# Supplementary material for: A moonlighting function of a chitin polysaccharide monooxygenase, CWR-1, in Neurospora crassa allorecognition
Source: eLife. 2022 Aug 30;11:e80459. doi: 10.7554/eLife.80459 (PMC9550227; doi:10.7554/eLife.80459)
Supplement: Figure 1—figure supplement 3—source data 1. — Comparison of the fusion test of the cwr-1HG1 paired with strains harboring cwr-2 alleles from six different haplogroups. [file elife-80459-fig1-figsupp3-data1.xlsx]

## Sheet: Figure 1-suppl 3B-source data 
Figure 1-figure supplement 3B-source data.
Comparison of the fusion test of the cwr-1HG1 paired with strains harboring cwr-2 alleles from six different haplogroups.
One-way ANOVA summary: F= 178.8, P value <0.0000000001
Tukey’s multiple comparison test	95.00% CI	Summary	P value
cwr-2HG1; DDD vs cwr-2HG2; DDD	62.45 to 84.88	*****	6e-10
cwr-2HG1; DDD vs cwr-2HG3; DDD	67.78 to 90.22	*****	2e-10
cwr-2HG1; DDD vs cwr-2HG4; DDD	55.45 to 77.88	*****	2e-09
cwr-2HG1; DDD vs cwr-2HG5; DDD	23.12 to 45.55	*****	3.1219e-06
cwr-2HG1; DDD vs cwr-2HG6; DDD	65.45 to 87.88	*****	3e-10
cwr-2HG2; DDD vs cwr-2HG3; DDD	-5.882 to 16.55	ns	0.614969
cwr-2HG2; DDD vs cwr-2HG4; DDD	-18.22 to 4.215	ns	0.349805
cwr-2HG2; DDD vs cwr-2HG5; DDD	-50.55 to -28.12	*****	7.072e-07
cwr-2HG2; DDD vs cwr-2HG6; DDD	-8.215 to 14.22	ns	0.939611
cwr-2HG3; DDD vs cwr-2HG4; DDD	-23.55 to -1.118	*	0.0284442
cwr-2HG3; DDD vs cwr-2HG5; DDD	-55.88 to -33.45	****	1.692e-07
cwr-2HG3; DDD vs cwr-2HG6; DDD	-13.55 to 8.882	ns	0.978544
cwr-2HG4; DDD vs cwr-2HG5; DDD	-43.55 to -21.12	*****	5.9378e-06
cwr-2HG4; DDD vs cwr-2HG6; DDD	-1.215 to 21.22	ns	0.0912917
cwr-2HG5; DDD vs cwr-2HG6; DDD	31.12 to 53.55	*****	3.111e-07
