# Supplementary material for: A moonlighting function of a chitin polysaccharide monooxygenase, CWR-1, in Neurospora crassa allorecognition
Source: eLife. 2022 Aug 30;11:e80459. doi: 10.7554/eLife.80459 (PMC9550227; doi:10.7554/eLife.80459)
Supplement: Figure 1—figure supplement 4—source data 2. — Deconvoluted mass spectra of the purified polysaccharide monooxygenase (PMO) domains from each haplogroup and selected mutants. The whole-protein mass spectrometry is described in ‘Materials and methods'. [file elife-80459-fig1-figsupp4-data2.xlsx]

## Sheet: Sheet1
HG1		HG2		HG3		HG4		HG5		HG6
X(Daltons)	Y(Counts)	X(Daltons)	Y(Counts)	X(Daltons)	Y(Counts)	X(Daltons)	Y(Counts)	X(Daltons)	Y(Counts)	X(Daltons)	Y(Counts)
10000	0.00014048	10000	0.000945747	10000	6.20233e-06	10000	4.21083e-05	10000	4.0169e-06	10000	0.000271507
10001	0.000335081	10001	0.00176826	10001	0.000483104	10001	0.000161199	10001	9.85161e-06	10001	0.000736445
10002	0.000557859	10002	0.00264716	10002	0.00137227	10002	0.000387627	10002	1.78422e-05	10002	0.00149886
10003	0.000747421	10003	0.00381485	10003	0.00308979	10003	0.000648039	10003	2.76245e-05	10003	0.00270697
10004	0.000852804	10004	0.0054636	10004	0.00585332	10004	0.000780581	10004	3.76147e-05	10004	0.00451454
10005	0.000870388	10005	0.00771677	10005	0.0092114	10005	0.000704567	10005	4.56494e-05	10005	0.00699067
10006	0.0008416	10006	0.010532	10006	0.0128606	10006	0.000512486	10006	5.0791e-05	10006	0.0100034
10007	0.000818991	10007	0.0136681	10007	0.0177105	10007	0.00033799	10007	5.47065e-05	10007	0.0131921
10008	0.000842105	10008	0.0168529	10008	0.0236736	10008	0.000236934	10008	6.15932e-05	10008	0.01612
10009	0.00093493	10009	0.0200724	10009	0.0281097	10009	0.000209596	10009	7.84334e-05	10009	0.0185063
10010	0.00110727	10010	0.0236793	10010	0.0289059	10010	0.000266329	10010	0.000118578	10010	0.020313
10011	0.00134433	10011	0.0281339	10011	0.0266835	10011	0.00050029	10011	0.000210471	10011	0.02161
10012	0.00159044	10012	0.0334118	10012	0.0229975	10012	0.0012653	10012	0.00040554	10012	0.0223657
10013	0.00175972	10013	0.0382428	10013	0.0180349	10013	0.00359348	10013	0.000748707	10013	0.0223517
10014	0.00179468	10014	0.0399451	10014	0.0116161	10014	0.00933849	10014	0.00115795	10014	0.0212605
10015	0.00172266	10015	0.0361378	10015	0.00552635	10015	0.0187157	10015	0.00134629	10015	0.0189854
10016	0.00164219	10016	0.0274949	10016	0.00187211	10016	0.0260337	10016	0.00111038	10016	0.0158367
10017	0.00167069	10017	0.0176984	10017	0.000511104	10017	0.0244121	10017	0.000652607	10017	0.012458
10018	0.00193619	10018	0.0100697	10018	0.000157319	10018	0.0161446	10018	0.00029301	10018	0.00949175
10019	0.00263804	10019	0.00545493	10019	6.73984e-05	10019	0.00839781	10019	0.000114123	10019	0.00730187
10020	0.00414844	10020	0.00307754	10020	4.09488e-05	10020	0.00400175	10020	4.54522e-05	10020	0.00595297
10021	0.00705482	10021	0.0019674	10021	4.23616e-05	10021	0.00205769	10021	2.18934e-05	10021	0.00536114
10022	0.0118478	10022	0.00150921	10022	8.10995e-05	10022	0.00130677	10022	1.45309e-05	10022	0.0054398
10023	0.0179703	10023	0.0014105	10023	0.000192116	10023	0.00110145	10023	1.41208e-05	10023	0.00615089
10024	0.0230684	10024	0.00156147	10024	0.000490695	10024	0.00122671	10024	1.97155e-05	10024	0.00744994
10025	0.0243955	10025	0.00193315	10025	0.00144881	10025	0.00168725	10025	3.63444e-05	10025	0.00915424
10026	0.021581	10026	0.00250758	10026	0.00438328	10026	0.00259107	10026	7.83054e-05	10026	0.0108568
10027	0.0168352	10027	0.0032258	10027	0.0121779	10027	0.00400205	10027	0.000173269	10027	0.0120681
10028	0.0125008	10028	0.00396507	10028	0.0311478	10028	0.00569531	10028	0.000352136	10028	0.0125373
10029	0.00955993	10029	0.00455932	10029	0.0686716	10029	0.00703788	10029	0.000608752	10029	0.0124077
10030	0.00798621	10030	0.00485679	10030	0.120756	10030	0.00737109	10030	0.00086698	10030	0.0120483
10031	0.00747668	10031	0.00478916	10031	0.162388	10031	0.00663103	10031	0.00103162	10031	0.011798
10032	0.0078014	10032	0.00440632	10032	0.157583	10032	0.0053664	10032	0.00107946	10032	0.0118419
10033	0.00887617	10033	0.00383938	10033	0.103935	10033	0.00416362	10033	0.00106354	10033	0.0122059
10034	0.0107759	10034	0.00321994	10034	0.0471687	10034	0.00327494	10034	0.00104664	10034	0.0127853
10035	0.0137887	10035	0.00262778	10035	0.018675	10035	0.00267539	10035	0.00105901	10035	0.0133944
10036	0.0185312	10036	0.00209569	10036	0.0100379	10036	0.00223635	10036	0.00109744	10036	0.0138698
10037	0.0261166	10037	0.0016405	10037	0.00757471	10037	0.00183984	10037	0.00114208	10037	0.0142064
10038	0.0383364	10038	0.00128087	10038	0.0067106	10038	0.00143864	10038	0.00118036	10038	0.0146218
10039	0.0576945	10039	0.0010328	10039	0.00747504	10039	0.00106137	10039	0.00122685	10039	0.0154871
10040	0.0868973	10040	0.000902289	10040	0.00990234	10040	0.000759354	10040	0.00132575	10040	0.0171865
10041	0.127232	10041	0.000890424	10041	0.0122015	10041	0.000554032	10041	0.00154339	10041	0.0199446
10042	0.175814	10042	0.00100342	10042	0.0146505	10042	0.000432449	10042	0.00196698	10042	0.0235602
10043	0.223534	10043	0.00124754	10043	0.0231011	10043	0.000368226	10043	0.0027028	10043	0.0270902
10044	0.257191	10044	0.00158938	10044	0.0433359	10044	0.000335166	10044	0.00383837	10044	0.0289436
10045	0.266838	10045	0.00189599	10045	0.068081	10045	0.000310493	10045	0.00533915	10045	0.0278476
10046	0.252876	10046	0.00195884	10046	0.077443	10046	0.000278318	10046	0.00693543	10046	0.0239861
10047	0.225636	10047	0.00167836	10047	0.0631838	10047	0.000235812	10047	0.00816932	10047	0.0188785
10048	0.198072	10048	0.00119556	10048	0.0390463	10048	0.000192603	10048	0.00867541	10048	0.0141194
10049	0.179194	10049	0.000742426	10049	0.0204392	10049	0.000160832	10049	0.00844735	10049	0.010493
10050	0.172574	10050	0.000435229	10050	0.0104145	10050	0.000147973	10050	0.0077982	10050	0.00803677
10051	0.177576	10051	0.000263207	10051	0.00543692	10051	0.000158845	10051	0.00709929	10051	0.00647016
10052	0.189791	10052	0.00017613	10052	0.00285513	10052	0.000201463	10052	0.00658315	10052	0.00548694
10053	0.200677	10053	0.000134446	10053	0.00187812	10053	0.000290506	10053	0.00630693	10053	0.00485463
10054	0.199898	10054	0.000115622	10054	0.00249543	10054	0.000442601	10054	0.00619187	10054	0.00441903
10055	0.181968	10055	0.000107723	10055	0.00529202	10055	0.000656132	10055	0.00607315	10055	0.00408098
10056	0.151022	10056	0.000104384	10056	0.0111832	10056	0.000882284	10056	0.00577213	10056	0.0037721
10057	0.117074	10057	0.000102855	10057	0.01945	10057	0.00102613	10057	0.00519912	10057	0.00344339
10058	0.0882584	10058	0.000103253	10058	0.0256441	10058	0.00100804	10058	0.00441835	10058	0.0030745
10059	0.0674633	10059	0.000107656	10059	0.025624	10059	0.000834259	10059	0.00360257	10059	0.00269355
10060	0.0538888	10060	0.000119289	10060	0.0207938	10060	0.000591594	10060	0.00292207	10060	0.00238106
10061	0.0455308	10061	0.000142613	10061	0.0149486	10061	0.000373739	10061	0.00247952	10061	0.00225443
10062	0.0405261	10062	0.000184537	10062	0.0101547	10062	0.000224752	10062	0.00232975	10062	0.00248487
10063	0.0375353	10063	0.000256715	10063	0.00755625	10063	0.000141403	10063	0.0025523	10063	0.00344767
10064	0.035742	10064	0.000378616	10064	0.00754454	10064	0.000103791	10064	0.00335952	10064	0.00621979
10065	0.0347329	10065	0.000579079	10065	0.00847042	10065	9.72598e-05	10065	0.00526598	10065	0.0139879
10066	0.034323	10066	0.000888237	10066	0.00832287	10066	0.000119861	10066	0.00928792	10066	0.0350472
10067	0.0343743	10067	0.00130551	10067	0.00728462	10067	0.000184128	10067	0.0167378	10067	0.0844403
10068	0.0346735	10068	0.00174527	10068	0.00652773	10068	0.000312189	10068	0.0275379	10068	0.170466
10069	0.034908	10069	0.00202333	10069	0.00785182	10069	0.000505353	10069	0.0374496	10069	0.262011
10070	0.0347332	10070	0.00197185	10070	0.0181638	10070	0.000691794	10070	0.0395627	10070	0.294686
10071	0.0338868	10071	0.00160582	10071	0.0569067	10071	0.000748013	10071	0.0321201	10071	0.24653
10072	0.03228	10072	0.0011168	10072	0.16308	10072	0.000634717	10072	0.0209357	10072	0.163492
10073	0.0300288	10073	0.000694052	10073	0.392092	10073	0.000444129	10073	0.011989	10073	0.0946256
10074	0.0274366	10074	0.000409094	10074	0.790545	10074	0.000280618	10074	0.00678187	10074	0.0532913
10075	0.0249455	10075	0.000243307	10075	1.30945	10075	0.000178914	10075	0.00425112	10075	0.0322006
10076	0.0230578	10076	0.000153976	10076	1.71276	10076	0.000128156	10076	0.00320569	10076	0.0222387
10077	0.0222564	10077	0.000107556	10077	1.73332	10077	0.000111904	10077	0.00299835	10077	0.0177828
10078	0.022969	10078	8.43238e-05	10078	1.36632	10078	0.000124189	10078	0.00341192	10078	0.0158374
10079	0.0255557	10079	7.3948e-05	10079	0.854547	10079	0.000174948	10079	0.004491	10079	0.0145676
10080	0.0301736	10080	7.099e-05	10080	0.43236	10080	0.000301139	10080	0.00645162	10080	0.0126875
10081	0.0363473	10081	7.19304e-05	10081	0.180692	10081	0.000593828	10081	0.00963899	10081	0.0097209
10082	0.0424048	10082	7.34061e-05	10082	0.0625057	10082	0.00123953	10082	0.014525	10082	0.00627347
10083	0.0456389	10083	7.17082e-05	10083	0.0169099	10083	0.00252309	10083	0.0217808	10083	0.00338905
10084	0.0439603	10084	6.40296e-05	10084	0.00343021	10084	0.00464976	10084	0.0324744	10084	0.00157963
10085	0.0377969	10085	5.07242e-05	10085	0.000744657	10085	0.00732552	10085	0.0484373	10085	0.000674891
10086	0.0298125	10086	3.56413e-05	10086	0.000320593	10086	0.00954206	10086	0.0728257	10086	0.00028653
10087	0.0227155	10087	2.31116e-05	10087	0.000266732	10087	0.0102226	10087	0.110738	10087	0.000131919
10088	0.0177984	10088	1.49744e-05	10088	0.000328551	10088	0.00921796	10088	0.169076	10088	7.11455e-05
10089	0.0151489	10089	1.07248e-05	10089	0.000486654	10089	0.00732831	10089	0.253283	10089	4.7198e-05
10090	0.0144346	10090	9.2653e-06	10090	0.000770504	10090	0.00544927	10090	0.357704	10090	3.88006e-05
10091	0.0153684	10091	1.00157e-05	10091	0.00118157	10091	0.00401719	10091	0.452746	10091	3.81687e-05
10092	0.0177788	10092	1.31664e-05	10092	0.00157284	10092	0.00307276	10092	0.48931	10092	4.21844e-05
10093	0.021491	10093	1.95263e-05	10093	0.00189638	10093	0.00250859	10093	0.438134	10093	4.89403e-05
10094	0.0262205	10094	3.00601e-05	10094	0.00275853	10094	0.00221944	10094	0.325737	10094	5.66017e-05
10095	0.03162	10095	4.53041e-05	10095	0.00498638	10095	0.00214964	10095	0.20972	10095	6.36837e-05
10096	0.0374649	10096	6.53923e-05	10096	0.00850732	10096	0.00229745	10096	0.126489	10096	6.97787e-05
10097	0.043788	10097	9.09538e-05	10097	0.013691	10097	0.00270805	10097	0.0788105	10097	7.55979e-05
10098	0.0507972	10098	0.000123788	10098	0.0239936	10098	0.0034521	10098	0.0554088	10098	8.21589e-05
10099	0.0585724	10099	0.000166043	10099	0.0451317	10099	0.00455912	10099	0.046193	10099	8.9784e-05
10100	0.0666648	10100	0.000217655	10100	0.0805853	10100	0.00589128	10100	0.0455132	10100	9.74715e-05
10101	0.0738152	10101	0.000273135	10101	0.127836	10101	0.00707192	10101	0.0505045	10101	0.000103059
10102	0.0781074	10102	0.000320596	10102	0.175428	10102	0.00768086	10102	0.0588687	10102	0.000104502
10103	0.0777458	10103	0.000346161	10103	0.196523	10103	0.0076244	10103	0.0674569	10103	0.000101695
10104	0.0721181	10104	0.0003423	10104	0.168419	10104	0.00722033	10104	0.072602	10104	9.72577e-05
10105	0.0623345	10105	0.000313254	10105	0.107839	10105	0.00691417	10105	0.0722037	10105	9.57706e-05
10106	0.0507519	10106	0.000272644	10106	0.0526825	10106	0.00703638	10106	0.0674644	10106	0.000103134
10107	0.039856	10107	0.000236121	10107	0.0207097	10107	0.00779333	10107	0.062274	10107	0.000128436
10108	0.0313375	10108	0.000216107	10108	0.00727393	10108	0.0093611	10108	0.0614302	10108	0.000190299
10109	0.0258815	10109	0.000222704	10109	0.00271198	10109	0.0119785	10109	0.070837	10109	0.000329965
10110	0.0235683	10110	0.000270319	10110	0.00135	10110	0.0160659	10110	0.102478	10110	0.000628746
10111	0.0244503	10111	0.000388236	10111	0.00112288	10111	0.0224303	10111	0.18979	10111	0.00120154
10112	0.0289346	10112	0.000631495	10112	0.00140092	10112	0.0325633	10112	0.430848	10112	0.00210143
10113	0.0377024	10113	0.00107662	10113	0.00211365	10113	0.0489494	10113	1.09262	10113	0.00315317
10114	0.050816	10114	0.00177357	10114	0.00345632	10114	0.0751569	10114	2.77063	10114	0.00397418
10115	0.0660106	10115	0.00266707	10115	0.00531459	10115	0.115297	10115	6.36026	10115	0.00431324
10116	0.0777888	10116	0.00359333	10116	0.0066444	10116	0.172396	10116	12.2894	10116	0.00427629
10117	0.0799206	10117	0.00440272	10117	0.00621988	10117	0.245386	10117	19.0916	10117	0.00415422
10118	0.0704112	10118	0.00506022	10118	0.00426641	10118	0.32467	10118	23.2228	10118	0.00417784
10119	0.0534085	10119	0.00560775	10119	0.00240289	10119	0.388138	10119	21.7927	10119	0.00445373
10120	0.0356172	10120	0.00607472	10120	0.00189675	10120	0.405352	10120	15.6905	10120	0.00501007
10121	0.0216204	10121	0.00645535	10121	0.00275215	10121	0.358269	10121	8.73897	10121	0.00586983
10122	0.0124918	10122	0.00676809	10122	0.00422988	10122	0.264054	10122	3.88271	10122	0.00716641
10123	0.00720873	10123	0.00713132	10123	0.00568113	10123	0.165408	10123	1.46291	10123	0.00934182
10124	0.00433465	10124	0.00779705	10124	0.00677254	10124	0.0939137	10124	0.512627	10124	0.013526
10125	0.00279389	10125	0.00917509	10125	0.00708137	10125	0.0538339	10125	0.186899	10125	0.0224464
10126	0.00195488	10126	0.0119413	10126	0.00647864	10126	0.0355046	10126	0.0790486	10126	0.0426147
10127	0.00149086	10127	0.0172915	10127	0.0055789	10127	0.0302037	10127	0.0419579	10127	0.0883014
10128	0.00124713	10128	0.0272665	10128	0.00477329	10128	0.0349977	10128	0.0288445	10128	0.183595
10129	0.00116086	10129	0.0446773	10129	0.00394804	10129	0.0536888	10129	0.0253085	10129	0.347301
10130	0.00122304	10130	0.0714778	10130	0.00316144	10130	0.0988634	10130	0.0270288	10130	0.548693
10131	0.00146685	10131	0.104982	10131	0.00251287	10131	0.192315	10131	0.0328982	10131	0.686603
10132	0.00196732	10132	0.135482	10132	0.00217385	10132	0.351607	10132	0.0423424	10132	0.674223
10133	0.00282854	10133	0.151585	10133	0.00303967	10133	0.556602	10133	0.0533525	10133	0.53866
10134	0.00412582	10134	0.150119	10134	0.00736753	10134	0.731991	10134	0.061373	10134	0.3766
10135	0.00579649	10135	0.138053	10135	0.0197095	10135	0.794795	10135	0.0613038	10135	0.251973
10136	0.0075587	10136	0.125198	10136	0.0483513	10136	0.726292	10136	0.0521724	10136	0.174336
10137	0.00898339	10137	0.118294	10137	0.108214	10137	0.578333	10137	0.0384817	10137	0.129731
10138	0.00971651	10138	0.120882	10138	0.226483	10138	0.419175	10138	0.0258249	10138	0.10297
10139	0.00967016	10139	0.135799	10139	0.431874	10139	0.290587	10139	0.0168582	10139	0.0835706
10140	0.00902655	10140	0.167573	10140	0.698134	10140	0.203454	10140	0.0114481	10140	0.0661244
10141	0.00808681	10141	0.224255	10141	0.908449	10141	0.152033	10141	0.00851549	10141	0.0496644
10142	0.00710697	10142	0.318272	10142	0.943488	10142	0.126718	10142	0.00712859	10142	0.0356308
10143	0.00621798	10143	0.464095	10143	0.815005	10143	0.11966	10143	0.00672775	10143	0.0252313
10144	0.00543157	10144	0.668927	10144	0.653635	10144	0.12481	10144	0.00702507	10144	0.0183367
10145	0.00469195	10145	0.917352	10145	0.54342	10145	0.13504	10145	0.00786251	10145	0.0139798
10146	0.00394215	10146	1.16486	10146	0.4471	10146	0.13996	10146	0.00909892	10146	0.0110906
10147	0.0031788	10147	1.35844	10147	0.314845	10147	0.129739	10147	0.0105567	10147	0.00885371
10148	0.00246191	10148	1.47144	10148	0.171276	10148	0.103925	10148	0.0120726	10148	0.0068345
10149	0.00187155	10149	1.51519	10149	0.070623	10149	0.072863	10149	0.0136583	10149	0.00498474
10150	0.00145688	10150	1.51876	10150	0.0249875	10150	0.0475679	10150	0.0157039	10150	0.00347197
10151	0.00122564	10151	1.50436	10151	0.0094837	10151	0.0320161	10151	0.0192067	10151	0.00242772
10152	0.00117073	10152	1.4777	10152	0.00432888	10152	0.0250175	10152	0.0262744	10152	0.00184546
10153	0.0013033	10153	1.4311	10153	0.00389946	10153	0.0250448	10153	0.04153	10153	0.00165926
10154	0.00167437	10154	1.35028	10154	0.00809646	10154	0.0333449	10154	0.0753822	10154	0.00186447
10155	0.00237255	10155	1.22113	10155	0.0187166	10155	0.0564	10155	0.149264	10155	0.00261677
10156	0.00346932	10156	1.03808	10156	0.0379945	10156	0.107967	10156	0.296852	10156	0.00432448
10157	0.00489495	10157	0.814361	10157	0.0600584	10157	0.202657	10157	0.543689	10157	0.00765362
10158	0.0063381	10158	0.583935	10158	0.0659489	10158	0.328635	10158	0.859886	10158	0.0131473
10159	0.00735733	10159	0.385904	10159	0.0490378	10159	0.424216	10159	1.14409	10159	0.0203066
10160	0.00769087	10160	0.242463	10160	0.0272317	10160	0.42319	10160	1.29896	10160	0.0270293
10161	0.00744049	10161	0.152359	10161	0.0138808	10161	0.331833	10161	1.31627	10161	0.0307805
10162	0.00694769	10162	0.101549	10162	0.00792995	10162	0.21549	10162	1.2609	10162	0.0306821
10163	0.00656619	10163	0.0755562	10163	0.00617749	10163	0.125003	10163	1.19993	10163	0.0279809
10164	0.00656122	10164	0.0646864	10164	0.00628541	10164	0.0706932	10164	1.16395	10164	0.0246236
10165	0.00714521	10165	0.064025	10165	0.00700762	10165	0.0424696	10165	1.14634	10165	0.0219119
10166	0.00854509	10166	0.0720156	10166	0.00824618	10166	0.0289955	10166	1.11452	10166	0.0201982
10167	0.0109867	10167	0.0891803	10167	0.0100964	10167	0.0232222	10167	1.02737	10167	0.0191097
10168	0.0144653	10168	0.116834	10168	0.0133665	10168	0.0215164	10168	0.862548	10168	0.017803
10169	0.01828	10169	0.155138	10169	0.0189773	10169	0.0218599	10169	0.639595	10169	0.0153814
10170	0.0208286	10170	0.200571	10170	0.0235173	10170	0.022657	10170	0.412474	10170	0.0116377
10171	0.0205215	10171	0.244746	10171	0.0214559	10171	0.0224754	10171	0.232142	10171	0.00744864
10172	0.0173243	10172	0.277007	10172	0.0141555	10172	0.020604	10172	0.116782	10172	0.0040353
10173	0.0128581	10173	0.289772	10173	0.00758296	10173	0.0174711	10173	0.0548446	10173	0.00192081
10174	0.00884909	10174	0.281963	10174	0.00410361	10174	0.0141232	10174	0.0254954	10174	0.000857355
10175	0.00604072	10175	0.258084	10175	0.00262476	10175	0.0113752	10175	0.0125292	10175	0.00038731
10176	0.00437454	10176	0.225055	10176	0.00180422	10176	0.00951222	10176	0.00693088	10176	0.000189895
10177	0.0035544	10177	0.189467	10177	0.00112189	10177	0.00847553	10177	0.0045307	10177	0.000106264
10178	0.00336575	10178	0.155944	10178	0.00065769	10178	0.00809148	10178	0.00358438	10178	6.95741e-05
10179	0.00377008	10179	0.126539	10179	0.000613059	10179	0.0081589	10179	0.00340357	10179	5.31961e-05
10180	0.00493468	10180	0.101168	10180	0.00125518	10180	0.00843158	10180	0.00372327	10180	4.62264e-05
10181	0.00725295	10181	0.0788113	10181	0.00261194	10181	0.00859139	10181	0.00439519	10181	4.35603e-05
10182	0.0112687	10182	0.0588266	10182	0.00383447	10182	0.0083144	10182	0.00519475	10182	4.21579e-05
10183	0.0173116	10183	0.0415677	10183	0.00396242	10183	0.00744948	10183	0.00574244	10183	4.01223e-05
10184	0.02485	10184	0.0279019	10184	0.00318492	10184	0.00614915	10184	0.00565813	10184	3.70111e-05
10185	0.0322201	10185	0.0182309	10185	0.00224988	10185	0.00476952	10185	0.0048748	10185	3.39027e-05
10186	0.0374934	10186	0.0120918	10186	0.00151707	10186	0.00362593	10186	0.00372711	10186	3.26581e-05
10187	0.0398617	10187	0.00853781	10187	0.00100487	10187	0.00285576	10187	0.00265701	10187	3.53924e-05
10188	0.0400376	10188	0.00666377	10188	0.000644285	10188	0.00245896	10188	0.00190876	10188	4.511e-05
10189	0.0394931	10189	0.00584232	10189	0.00045002	10189	0.00239954	10189	0.00151092	10189	6.7264e-05
10190	0.0396301	10190	0.00571195	10190	0.000504002	10190	0.00267316	10190	0.00142117	10190	0.00011064
10191	0.0415136	10191	0.00608559	10191	0.000871496	10191	0.00332622	10191	0.00164694	10191	0.000183063
10192	0.0459613	10192	0.00686499	10192	0.0015458	10192	0.00443073	10192	0.00231507	10192	0.000276708
10193	0.0535251	10193	0.00796386	10193	0.00207136	10193	0.0060009	10193	0.00371675	10193	0.000353829
10194	0.0639554	10194	0.00921337	10194	0.0018473	10194	0.00784631	10194	0.00626769	10194	0.000365736
10195	0.075027	10195	0.0102609	10195	0.00123797	10195	0.00945067	10195	0.0102075	10195	0.000302348
10196	0.081798	10196	0.010587	10196	0.00121474	10196	0.0101061	10196	0.0150218	10196	0.000204815
10197	0.0788395	10197	0.00980489	10197	0.00220804	10197	0.00941779	10197	0.0192336	10197	0.000120607
10198	0.0654087	10198	0.00807216	10198	0.0040479	10198	0.00773325	10198	0.0213619	10198	6.76654e-05
10199	0.0472023	10199	0.00606294	10199	0.00594916	10199	0.00587942	10199	0.0212853	10199	4.05831e-05
10200	0.0311469	10200	0.00443076	10200	0.00649083	10200	0.00450443	10200	0.0203057	10200	2.92514e-05
10201	0.0202829	10201	0.00343726	10201	0.00518352	10201	0.00382825	10201	0.0201094	10201	2.76239e-05
10202	0.0140722	10202	0.00305482	10202	0.00326231	10202	0.00385951	10202	0.0222175	10202	3.50432e-05
10203	0.0109223	10203	0.00320012	10203	0.00192011	10203	0.00463093	10203	0.0284455	10203	5.70229e-05
10204	0.00954626	10204	0.00381481	10204	0.00143914	10204	0.00620899	10204	0.0418653	10204	0.000107946
10205	0.00912458	10205	0.0047691	10205	0.00168363	10205	0.00844227	10205	0.0675692	10205	0.000212416
10206	0.00912332	10206	0.00571607	10206	0.00207523	10206	0.0106708	10206	0.111827	10206	0.000395145
10207	0.00916946	10207	0.00617543	10207	0.00187704	10207	0.0119605	10207	0.177341	10207	0.000653774
10208	0.00902036	10208	0.00592028	10208	0.00111309	10208	0.0118631	10208	0.254742	10208	0.000936862
10209	0.00854965	10209	0.00517718	10209	0.000475941	10209	0.0107023	10209	0.318345	10209	0.00116115
10210	0.00772289	10210	0.00435249	10210	0.000375815	10210	0.00907252	10210	0.337627	10210	0.00125894
10211	0.00659777	10211	0.00370813	10211	0.00087473	10211	0.00736015	10211	0.300639	10211	0.00121175
10212	0.00533806	10212	0.00330516	10212	0.00197939	10212	0.00571421	10212	0.2255	10212	0.00105165
10213	0.00417011	10213	0.00309013	10213	0.00373519	10213	0.00421876	10213	0.145342	10213	0.000841104
10214	0.00327934	10214	0.00296809	10214	0.00653312	10214	0.00298058	10214	0.0838749	10214	0.000644334
10215	0.00274862	10215	0.00284407	10215	0.0102626	10215	0.00208299	10215	0.0463048	10215	0.000504619
10216	0.00259515	10216	0.0026579	10216	0.0127947	10216	0.00153127	10216	0.026758	10216	0.000443163
10217	0.00285801	10217	0.00240726	10217	0.0115646	10217	0.00127929	10217	0.0179293	10217	0.000483751
10218	0.00369235	10218	0.00213695	10218	0.00727002	10218	0.00130433	10218	0.015272	10218	0.000709419
10219	0.00549619	10219	0.0019021	10219	0.00332145	10219	0.00169404	10219	0.0174573	10219	0.00141611
10220	0.00915905	10220	0.00173848	10220	0.00159541	10220	0.0028055	10220	0.0267228	10220	0.0035931
10221	0.0166002	10221	0.00165619	10221	0.00175811	10221	0.0056894	10221	0.0517416	10221	0.0101589
10222	0.0318852	10222	0.00164607	10222	0.00411711	10222	0.0131763	10222	0.115615	10222	0.0274113
10223	0.0632482	10223	0.00168598	10223	0.0117709	10223	0.0321132	10223	0.269968	10223	0.0613527
10224	0.125757	10224	0.00174359	10224	0.0296244	10224	0.0762315	10224	0.605303	10224	0.10288
10225	0.242044	10225	0.00178015	10225	0.0518548	10225	0.165737	10225	1.22837	10225	0.122439
10226	0.434715	10226	0.00175866	10226	0.0569694	10226	0.316637	10226	2.18169	10226	0.10287
10227	0.705079	10227	0.00165526	10227	0.0393977	10227	0.518766	10227	3.33863	10227	0.0635962
10228	1.00932	10228	0.0014686	10228	0.021056	10228	0.718008	10228	4.37072	10228	0.0314837
10229	1.26364	10229	0.00122206	10229	0.0168105	10229	0.829545	10229	4.87721	10229	0.0140802
10230	1.39161	10230	0.000956444	10230	0.0235488	10230	0.793402	10230	4.652	10230	0.00654759
10231	1.37192	10231	0.00071423	10231	0.0357428	10231	0.630783	10231	3.86167	10231	0.00361348
10232	1.23806	10232	0.000523758	10232	0.0481046	10232	0.429095	10232	2.90594	10232	0.00258019
10233	1.04108	10233	0.000393519	10233	0.0507154	10233	0.265513	10233	2.10869	10233	0.00241018
10234	0.820717	10234	0.000318579	10234	0.0393984	10234	0.163224	10234	1.57921	10234	0.00275986
10235	0.602566	10235	0.000291767	10235	0.0237848	10235	0.109563	10235	1.28407	10235	0.0034759
10236	0.407017	10236	0.0003135	10236	0.0124621	10236	0.086185	10236	1.15009	10236	0.00433277
10237	0.251511	10237	0.000401525	10237	0.0059017	10237	0.0812534	10237	1.10695	10237	0.00499901
10238	0.14399	10238	0.000608277	10238	0.00257482	10238	0.0889957	10238	1.09033	10238	0.00525952
10239	0.0792603	10239	0.00105989	10239	0.00110698	10239	0.10582	10239	1.0464	10239	0.00520338
10240	0.0445086	10240	0.00203963	10240	0.000539283	10240	0.126737	10240	0.95156	10240	0.00512329
10241	0.0273591	10241	0.00413906	10241	0.000351174	10241	0.144756	10241	0.824135	10241	0.00532391
10242	0.0196396	10242	0.00843378	10242	0.000253948	10242	0.154473	10242	0.705532	10242	0.0060819
10243	0.0171445	10243	0.0163651	10243	0.000170309	10243	0.155523	10243	0.630581	10243	0.0077402
10244	0.0182538	10244	0.0285417	10244	0.00013786	10244	0.151008	10244	0.617221	10244	0.0108293
10245	0.0228432	10245	0.0421711	10245	0.000183615	10245	0.143136	10245	0.67298	10245	0.016109
10246	0.0314298	10246	0.0501383	10246	0.000269063	10246	0.131128	10246	0.797918	10246	0.0243179
10247	0.0439903	10247	0.0464739	10247	0.000294119	10247	0.113032	10247	0.973039	10247	0.0353015
10248	0.0584895	10248	0.0335687	10248	0.000210455	10248	0.0895018	10248	1.14437	10248	0.0466507
10249	0.0707079	10249	0.019614	10249	0.000101779	10249	0.0651027	10249	1.23483	10249	0.0535102
10250	0.0767442	10250	0.00998012	10250	6.31648e-05	10250	0.0450264	10250	1.19611	10250	0.051653
10251	0.0759458	10251	0.00487833	10251	0.000175553	10251	0.0314919	10251	1.04806	10251	0.0417119
10252	0.0707486	10252	0.00253266	10252	0.000841489	10252	0.023791	10252	0.855212	10252	0.0288302
10253	0.0641406	10253	0.00150892	10253	0.00323666	10253	0.0202718	10253	0.675025	10253	0.0179024
10254	0.0578894	10254	0.00107208	10254	0.00874585	10254	0.0195989	10254	0.533996	10254	0.010652
10255	0.0525121	10255	0.000910036	10255	0.0179863	10255	0.0209739	10255	0.434932	10255	0.00649778
10256	0.0480578	10256	0.000906985	10256	0.0310828	10256	0.0240051	10256	0.371362	10256	0.00431619
10257	0.044799	10257	0.00104183	10257	0.0472942	10257	0.0286788	10257	0.336303	10257	0.00327452
10258	0.0434989	10258	0.00136031	10258	0.0694668	10258	0.035513	10258	0.325279	10258	0.00293218
10259	0.0454006	10259	0.00198378	10259	0.107805	10259	0.0457707	10259	0.336568	10259	0.0031428
10260	0.0523071	10260	0.00312282	10260	0.152597	10260	0.0616017	10260	0.370408	10260	0.00398317
10261	0.0668207	10261	0.00501863	10261	0.168314	10261	0.0858897	10261	0.427247	10261	0.00571485
10262	0.0920287	10262	0.00767936	10262	0.148783	10262	0.12107	10262	0.503979	10262	0.00864992
10263	0.128942	10263	0.0104485	10263	0.129958	10263	0.16558	10263	0.587301	10263	0.012723
10264	0.170661	10264	0.011999	10264	0.155489	10264	0.208032	10264	0.647429	10264	0.0169015
10265	0.198583	10265	0.0113405	10265	0.235882	10265	0.225911	10265	0.644184	10265	0.0193518
10266	0.192631	10266	0.00889414	10266	0.291397	10266	0.200712	10266	0.555951	10266	0.0189111
10267	0.152238	10267	0.00605741	10267	0.239625	10267	0.141305	10267	0.40896	10267	0.0162366
10268	0.0993749	10268	0.00388585	10268	0.130432	10268	0.0795792	10268	0.261474	10268	0.0130141
10269	0.0564014	10269	0.00260781	10269	0.0513199	10269	0.03826	10269	0.154855	10269	0.0105087
10270	0.0302383	10270	0.00202469	10270	0.0165907	10270	0.0177302	10270	0.0938038	10270	0.00915194
10271	0.0168979	10271	0.00192733	10271	0.0053883	10271	0.00923974	10271	0.0646016	10271	0.00892021
10272	0.0107565	10272	0.00222068	10272	0.00229604	10272	0.00620231	10272	0.05428	10272	0.00967064
10273	0.0082227	10273	0.00285558	10273	0.00119417	10273	0.00569033	10273	0.0558231	10273	0.0111668
10274	0.00757504	10274	0.00365271	10274	0.00076871	10274	0.00684487	10274	0.0659599	10274	0.0129267
10275	0.00810099	10275	0.00419006	10275	0.000774102	10275	0.00965815	10275	0.08139	10275	0.0141973
10276	0.00952886	10276	0.00406743	10276	0.00100678	10276	0.0141835	10276	0.0964881	10276	0.0143148
10277	0.0117746	10277	0.00334802	10277	0.00120352	10277	0.0200255	10277	0.105432	10277	0.0132068
10278	0.0148895	10278	0.00247366	10278	0.00112784	10278	0.0265015	10278	0.106886	10278	0.0114366
10279	0.0190744	10279	0.00179542	10279	0.000872785	10279	0.0332735	10279	0.104798	10279	0.0097321
10280	0.0246045	10280	0.0014016	10280	0.000791037	10280	0.0404517	10280	0.104927	10280	0.00857286
10281	0.0315636	10281	0.00124717	10281	0.00106501	10281	0.0479009	10281	0.112459	10281	0.00814395
10282	0.0394531	10282	0.00127504	10282	0.00160225	10282	0.0545303	10282	0.13288	10282	0.0084715
10283	0.0469784	10283	0.00144562	10283	0.0020909	10283	0.0585488	10283	0.17493	10283	0.00949224
10284	0.0523887	10284	0.00172084	10284	0.00208302	10284	0.0588765	10284	0.255079	10284	0.0109744
10285	0.0542965	10285	0.0020475	10285	0.00149477	10285	0.056281	10285	0.40343	10285	0.0123729
10286	0.0523499	10286	0.00236316	10286	0.000803498	10286	0.0527973	10286	0.668016	10286	0.0128786
10287	0.0473042	10287	0.00262065	10287	0.000481294	10287	0.0502417	10287	1.10712	10287	0.0118844
10288	0.0406202	10288	0.00280835	10288	0.000805296	10288	0.0493974	10288	1.75724	10288	0.00954847
10289	0.0338928	10289	0.00295476	10289	0.00189094	10289	0.0500717	10289	2.59075	10289	0.00673314
10290	0.0283384	10290	0.00312346	10290	0.00310069	10290	0.0514871	10290	3.51809	10290	0.00430845
10291	0.0245488	10291	0.00340608	10291	0.00357432	10291	0.0527316	10291	4.45991	10291	0.00263643
10292	0.0225635	10292	0.00391637	10292	0.00345001	10292	0.0531295	10292	5.42069	10292	0.00163742
10293	0.0220594	10293	0.00478215	10293	0.00310097	10293	0.0523486	10293	6.49153	10293	0.00108688
10294	0.0224522	10294	0.00611871	10294	0.0025364	10294	0.0502852	10294	7.80153	10294	0.000795756
10295	0.0229492	10295	0.0079674	10295	0.00203997	10295	0.0470212	10295	9.47235	10295	0.000647464
10296	0.0227601	10296	0.0102279	10296	0.00200499	10296	0.0429492	10296	11.5878	10296	0.000578682
10297	0.0214698	10297	0.012662	10297	0.00279028	10297	0.0388057	10297	14.1359	10297	0.000555932
10298	0.0192186	10298	0.0149703	10298	0.00522395	10298	0.0354044	10298	16.8558	10298	0.000560249
10299	0.0164683	10299	0.0168053	10299	0.0111829	10299	0.0332671	10299	19.0103	10299	0.000578885
10300	0.0136382	10300	0.0176799	10300	0.0235403	10300	0.0324327	10300	19.4036	10300	0.000602137
10301	0.010959	10301	0.0170243	10301	0.0404476	10301	0.032481	10301	17.1394	10301	0.000624524
10302	0.00854389	10302	0.0146327	10302	0.0508748	10302	0.0327303	10302	12.7361	10302	0.000648438
10303	0.00648389	10303	0.0111154	10303	0.048824	10303	0.0326305	10303	7.99747	10303	0.000686619
10304	0.00485609	10304	0.00760327	10304	0.0468348	10304	0.032181	10304	4.43892	10304	0.000761644
10305	0.00367944	10305	0.00492	10305	0.0629827	10305	0.0319994	10305	2.35669	10305	0.000904042
10306	0.00290009	10306	0.00322203	10306	0.097211	10306	0.0329877	10306	1.31103	10306	0.00114769
10307	0.00242077	10307	0.00227616	10307	0.127901	10307	0.0359323	10307	0.821658	10307	0.00151012
10308	0.00213504	10308	0.00180499	10308	0.13751	10308	0.0411703	10308	0.596549	10308	0.0019428
10309	0.00194337	10309	0.00161967	10309	0.125302	10309	0.0481092	10309	0.4899	10309	0.00228261
10310	0.00176201	10310	0.00161827	10310	0.0959446	10310	0.0546965	10310	0.428046	10310	0.00231802
10311	0.00154012	10311	0.00175668	10311	0.060364	10311	0.0577429	10311	0.369682	10311	0.00199312
10312	0.00127681	10312	0.00203164	10312	0.0336019	10312	0.0548461	10312	0.295876	10312	0.00149048
10313	0.00101338	10313	0.00247871	10313	0.0201051	10313	0.0464912	10313	0.210093	10313	0.00104416
10314	0.000800156	10314	0.00318098	10314	0.0136698	10314	0.0357826	10314	0.129927	10314	0.000761474
10315	0.000670584	10315	0.0042886	10315	0.00893583	10315	0.026049	10315	0.0705411	10315	0.000642388
10316	0.000646309	10316	0.00605763	10316	0.00571575	10316	0.0190626	10316	0.0348578	10316	0.000673069
10317	0.00077226	10317	0.0089263	10317	0.00541405	10317	0.0151225	10317	0.0167306	10317	0.000891253
10318	0.00119449	10318	0.0136592	10318	0.00883137	10318	0.0140846	10318	0.00853254	10318	0.00144748
10319	0.00236435	10319	0.0215904	10319	0.0154551	10319	0.0164538	10319	0.00511108	10319	0.00273182
10320	0.00557129	10320	0.0349162	10320	0.0211827	10320	0.0248149	10320	0.00391217	10320	0.00565933
10321	0.0138872	10321	0.0566474	10321	0.0213727	10321	0.0469763	10321	0.00397318	10321	0.0121981
10322	0.0319713	10322	0.0890625	10322	0.0165359	10322	0.102223	10322	0.00520516	10322	0.0258748
10323	0.0600273	10323	0.129191	10323	0.0105256	10323	0.224598	10323	0.0080512	10323	0.0506875
10324	0.0838342	10324	0.163445	10324	0.00645159	10324	0.433032	10324	0.0130261	10324	0.0856337
10325	0.0831006	10325	0.171424	10325	0.00561102	10325	0.649572	10325	0.0195653	10325	0.117537
10326	0.058753	10326	0.144408	10326	0.00853526	10326	0.701291	10326	0.0249165	10326	0.126868
10327	0.0314285	10327	0.0975116	10327	0.0181774	10327	0.533508	10327	0.0256406	10327	0.108875
10328	0.0141826	10328	0.0545148	10328	0.0414124	10328	0.299163	10328	0.0212767	10328	0.0791034
10329	0.00622576	10329	0.0269001	10329	0.0874877	10329	0.139002	10329	0.0148206	10329	0.0543343
10330	0.00306976	10330	0.0127606	10330	0.165368	10330	0.0644239	10330	0.00932445	10330	0.0404314
10331	0.00188559	10331	0.00637309	10331	0.274456	10331	0.0373436	10331	0.00580581	10331	0.0368915
10332	0.00149085	10332	0.00362686	10332	0.400152	10332	0.0331006	10332	0.00391105	10332	0.0442637
10333	0.00146333	10333	0.00248213	10333	0.512127	10333	0.049153	10333	0.00304204	10333	0.069394
10334	0.00165886	10334	0.00209076	10334	0.547284	10334	0.115219	10334	0.00280402	10334	0.132331
10335	0.00202817	10335	0.00215498	10335	0.475127	10335	0.358474	10335	0.00302093	10335	0.277046
10336	0.00256488	10336	0.00263896	10336	0.374782	10336	1.19707	10336	0.00365154	10336	0.576756
10337	0.00330237	10337	0.00366027	10337	0.306751	10337	3.5449	10337	0.00471003	10337	1.10622
10338	0.0043035	10338	0.00540687	10338	0.225625	10338	8.09637	10338	0.00619296	10338	1.85847
10339	0.00559852	10339	0.00793212	10339	0.120186	10339	13.1562	10339	0.00800241	10339	2.6529
10340	0.00705329	10340	0.0107772	10340	0.0480151	10340	14.8193	10340	0.00986932	10340	3.16374
10341	0.00824305	10341	0.0127915	10341	0.0285419	10341	11.7908	10341	0.0113245	10341	3.13358
10342	0.00855981	10342	0.0128112	10342	0.0471134	10342	6.97417	10342	0.0118232	10342	2.59705
10343	0.00767524	10343	0.0108196	10343	0.125249	10343	3.29572	10343	0.0110715	10343	1.84754
10344	0.00592297	10344	0.00799912	10344	0.301858	10344	1.35758	10344	0.00931954	10344	1.18131
10345	0.00404135	10345	0.005556	10345	0.490671	10345	0.541208	10345	0.00724619	10345	0.722588
10346	0.00257742	10346	0.00395961	10346	0.532981	10346	0.236869	10346	0.00549517	10346	0.45186
10347	0.00165647	10347	0.00314344	10347	0.461574	10347	0.130441	10347	0.00437007	10347	0.304526
10348	0.00116041	10348	0.00293587	10348	0.425172	10348	0.100644	10348	0.00390833	10348	0.226631
10349	0.000941044	10349	0.00328647	10349	0.448591	10349	0.112158	10349	0.00410694	10349	0.184724
10350	0.000903067	10350	0.00436856	10350	0.457891	10350	0.168945	10350	0.00509826	10350	0.159682
10351	0.00100046	10351	0.00674663	10351	0.395979	10351	0.299268	10351	0.00728047	10351	0.140579
10352	0.00120233	10352	0.0118094	10352	0.269945	10352	0.529947	10352	0.0114853	10352	0.121797
10353	0.00145171	10353	0.0227538	10353	0.141876	10353	0.818272	10353	0.0192417	10353	0.101851
10354	0.00164814	10354	0.0463447	10354	0.0630172	10354	1.01491	10354	0.033053	10354	0.0819876
10355	0.00169136	10355	0.0946123	10355	0.03002	10355	0.988612	10355	0.0561687	10355	0.0642475
10356	0.00155648	10356	0.182706	10356	0.0207226	10356	0.775253	10356	0.0906976	10356	0.0499784
10357	0.00130978	10357	0.317867	10357	0.0293229	10357	0.516445	10357	0.133598	10357	0.0394283
10358	0.00104803	10358	0.484511	10358	0.0584026	10358	0.312663	10358	0.174107	10358	0.0320943
10359	0.000838448	10359	0.645167	10359	0.0963907	10359	0.185159	10359	0.198876	10359	0.0272072
10360	0.00070733	10360	0.764411	10360	0.124788	10360	0.115775	10360	0.202444	10360	0.0240315
10361	0.000659365	10361	0.830651	10361	0.142678	10361	0.0821292	10361	0.190661	10361	0.0219676
10362	0.000698914	10362	0.853767	10362	0.147985	10362	0.0694514	10362	0.17365	10362	0.0205467
10363	0.000842164	10363	0.847909	10363	0.132303	10363	0.070336	10363	0.158097	10363	0.0194019
10364	0.00111753	10364	0.818539	10364	0.105187	10364	0.0810524	10364	0.145132	10364	0.0182656
10365	0.00154953	10365	0.761156	10365	0.076763	10365	0.0967605	10365	0.132003	10365	0.0170069
10366	0.0021294	10366	0.669828	10366	0.0477137	10366	0.107983	10366	0.115142	10366	0.0156701
10367	0.00280564	10367	0.548627	10367	0.0284885	10367	0.104676	10367	0.0935038	10367	0.0144485
10368	0.00353311	10368	0.415305	10368	0.0401207	10368	0.086602	10368	0.0699406	10368	0.0135839
10369	0.00435387	10369	0.292388	10369	0.126059	10369	0.0638994	10369	0.0489489	10369	0.0132598
10370	0.00544249	10370	0.194807	10370	0.395259	10370	0.0459286	10370	0.0333057	10370	0.013541
10371	0.00711008	10371	0.125685	10371	1.01441	10371	0.0354334	10371	0.0231336	10371	0.0143579
10372	0.00980471	10372	0.0804377	10372	2.02301	10372	0.0313859	10372	0.0171589	10372	0.0155318
10373	0.0140885	10373	0.0523397	10373	3.1647	10373	0.032502	10373	0.0140393	10373	0.0168959
10374	0.0204947	10374	0.0355708	10374	3.98118	10374	0.0385002	10374	0.0129062	10374	0.0185282
10375	0.0291816	10375	0.025976	10375	4.11693	10375	0.0502651	10375	0.0134147	10375	0.0209882
10376	0.0394789	10376	0.0208477	10376	3.62252	10376	0.0697758	10376	0.0156558	10376	0.025498
10377	0.0496679	10377	0.0184944	10377	2.78906	10377	0.0993723	10377	0.0200141	10377	0.034244
10378	0.0573886	10378	0.0178302	10378	1.8408	10378	0.138964	10378	0.0268142	10378	0.0509668
10379	0.060691	10379	0.0180709	10379	0.997202	10379	0.181067	10379	0.0356065	10379	0.0813755
10380	0.0591144	10380	0.0186258	10380	0.436072	10380	0.209477	10380	0.0445416	10380	0.131795
10381	0.0538999	10381	0.019178	10381	0.157561	10381	0.209699	10381	0.0509832	10381	0.204464
10382	0.0471115	10382	0.0197422	10382	0.0531179	10382	0.18303	10382	0.0533898	10382	0.291932
10383	0.040473	10383	0.0205031	10383	0.0237983	10383	0.144507	10383	0.0523428	10383	0.377414
10384	0.0348107	10384	0.0215088	10384	0.0247172	10384	0.108329	10384	0.0495429	10384	0.442709
10385	0.0302091	10385	0.022436	10385	0.0460566	10385	0.0802421	10385	0.0463015	10385	0.475977
10386	0.0264589	10386	0.022618	10386	0.074104	10386	0.0599886	10386	0.0429919	10386	0.473922
10387	0.0234255	10387	0.0214387	10387	0.0816478	10387	0.0456242	10387	0.0393707	10387	0.440625
10388	0.0211747	10388	0.0188386	10388	0.0685	10388	0.0355922	10388	0.0351477	10388	0.385576
10389	0.0198877	10389	0.0153947	10389	0.0682616	10389	0.0289761	10389	0.0303795	10389	0.320738
10390	0.0197251	10390	0.0118821	10390	0.0890094	10390	0.0251943	10390	0.0255049	10390	0.257088
10391	0.0207494	10391	0.00883384	10391	0.1017	10391	0.0238052	10391	0.0211003	10391	0.202435
10392	0.0228913	10392	0.00643984	10392	0.0931777	10392	0.0244551	10392	0.0176001	10392	0.16119
10393	0.0259401	10393	0.00466736	10393	0.076594	10393	0.0267701	10393	0.015169	10393	0.135373
10394	0.0296204	10394	0.00339346	10394	0.0619776	10394	0.0300824	10394	0.0137274	10394	0.126393
10395	0.0337952	10395	0.00247868	10395	0.0563152	10395	0.0330944	10395	0.0130214	10395	0.137875
10396	0.0386764	10396	0.00179981	10396	0.0715702	10396	0.0339178	10396	0.0126626	10396	0.180319
10397	0.0448624	10397	0.00126804	10397	0.102535	10397	0.0310239	10397	0.0121852	10397	0.278683
10398	0.0531549	10398	0.000839835	10398	0.114616	10398	0.0246826	10398	0.0112195	10398	0.481844
10399	0.0642193	10399	0.000510865	10399	0.092141	10399	0.0171261	10399	0.00972256	10399	0.862388
10400	0.0781454	10400	0.000287145	10400	0.0633249	10400	0.0107832	10400	0.00800982	10400	1.48056
10401	0.0940484	10401	0.000157138	10401	0.0510726	10401	0.00666045	10401	0.00650201	10401	2.30744
10402	0.110053	10402	9.2512e-05	10402	0.0559389	10402	0.00447798	10402	0.00546734	10402	3.18366
10403	0.123953	10403	6.62452e-05	10403	0.085938	10403	0.00362758	10403	0.0049824	10403	3.90543
10404	0.134338	10404	6.35027e-05	10404	0.181202	10404	0.00376589	10404	0.0050257	10404	4.37167
10405	0.141446	10405	8.29168e-05	10405	0.410094	10405	0.00497628	10405	0.00553519	10405	4.62854
10406	0.147185	10406	0.000136291	10406	0.775365	10406	0.00775955	10406	0.00636382	10406	4.78737
10407	0.154423	10407	0.000244028	10407	1.15791	10407	0.0127068	10407	0.00718658	10407	4.92367
10408	0.166184	10408	0.00040763	10408	1.47885	10408	0.0194257	10408	0.00753519	10408	5.02937
10409	0.185308	10409	0.000565522	10409	1.73937	10409	0.0254271	10409	0.00709406	10409	5.02593
10410	0.214771	10410	0.000620098	10410	1.80706	10410	0.0274312	10410	0.00600263	10410	4.82803
10411	0.258781	10411	0.000551125	10411	1.51607	10411	0.0247045	10411	0.00474012	10411	4.41959
10412	0.324806	10412	0.000435081	10412	0.99274	10412	0.0196189	10412	0.00372877	10412	3.87391
10413	0.426919	10413	0.000348575	10413	0.531009	10413	0.0148683	10413	0.00314225	10413	3.29926
10414	0.591545	10414	0.000324972	10414	0.249782	10414	0.0116623	10414	0.00299803	10414	2.7733
10415	0.869041	10415	0.000389585	10415	0.103123	10415	0.0100927	10415	0.00330443	10415	2.32297
10416	1.35967	10416	0.000623574	10416	0.0361519	10416	0.0100006	10416	0.0041405	10416	1.94287
10417	2.27274	10417	0.00129903	10417	0.0128824	10417	0.0114713	10417	0.00567883	10417	1.62006
10418	4.05218	10418	0.00327717	10418	0.00759232	10418	0.0150829	10418	0.00817974	10418	1.34702
10419	7.59553	10419	0.00907111	10419	0.00700052	10419	0.0221176	10419	0.0119655	10419	1.12187
10420	14.4496	10420	0.024711	10420	0.00737164	10420	0.0346381	10420	0.0173623	10420	0.943324
10421	26.371	10421	0.0597355	10421	0.0104478	10421	0.0548549	10421	0.0245973	10421	0.807713
10422	43.204	10422	0.117923	10422	0.0267769	10422	0.0831147	10422	0.0337007	10422	0.709714
10423	59.9886	10423	0.180879	10423	0.107568	10423	0.115472	10423	0.0445812	10423	0.64533
10424	68.5619	10424	0.213653	10424	0.437258	10424	0.144402	10424	0.057439	10424	0.614889
10425	65.244	10425	0.200734	10425	1.39151	10425	0.164164	10425	0.0734863	10425	0.625444
10426	54.4764	10426	0.160487	10426	3.16943	10426	0.175646	10426	0.0958109	10426	0.693542
10427	43.2161	10427	0.119499	10427	5.04545	10427	0.185617	10427	0.130389	10427	0.849767
10428	35.3097	10428	0.0911227	10428	5.93742	10428	0.202789	10428	0.187298	10428	1.14351
10429	31.3079	10429	0.07695	10429	6.00266	10429	0.235088	10429	0.2811	10429	1.63714
10430	30.2879	10430	0.0751002	10430	6.29935	10430	0.287852	10430	0.42642	10430	2.36676
10431	30.7887	10431	0.0845749	10431	6.99608	10431	0.35955	10431	0.622843	10431	3.26446
10432	31.0502	10432	0.105573	10432	6.80259	10432	0.434523	10432	0.833197	10432	4.11801
10433	29.5522	10433	0.137222	10433	4.92485	10433	0.481448	10433	0.983612	10433	4.68126
10434	25.8727	10434	0.173849	10434	2.61314	10434	0.469776	10434	1.00929	10434	4.86407
10435	20.8524	10435	0.203251	10435	1.2031	10435	0.396066	10435	0.906965	10435	4.77385
10436	15.7795	10436	0.211928	10436	0.598739	10436	0.289706	10436	0.731305	10436	4.58467
10437	11.5531	10437	0.195412	10437	0.298889	10437	0.189051	10437	0.546997	10437	4.41676
10438	8.48235	10438	0.162314	10438	0.123124	10438	0.116185	10438	0.394084	10438	4.31782
10439	6.4986	10439	0.126636	10439	0.0409087	10439	0.0729793	10439	0.28506	10439	4.30276
10440	5.39984	10440	0.0979301	10440	0.013592	10440	0.0517913	10440	0.216447	10440	4.39086
10441	4.98884	10441	0.0786743	10441	0.00624086	10441	0.0454111	10441	0.179531	10441	4.60832
10442	5.10017	10442	0.0669585	10442	0.00625055	10442	0.0509434	10442	0.165963	10442	4.94957
10443	5.53141	10443	0.0592108	10443	0.0164548	10443	0.0694923	10443	0.16868	10443	5.31044
10444	5.9345	10444	0.0516048	10444	0.0555432	10444	0.101369	10444	0.179748	10444	5.44663
10445	5.85105	10445	0.0415398	10445	0.134984	10445	0.13469	10445	0.188423	10445	5.07366
10446	5.04072	10446	0.0293599	10446	0.203757	10446	0.142162	10446	0.184308	10446	4.13318
10447	3.76372	10447	0.01794	10447	0.193666	10447	0.110799	10447	0.165064	10447	2.9282
10448	2.53343	10448	0.0097479	10448	0.127287	10448	0.0643254	10448	0.138571	10448	1.8696
10449	1.65999	10449	0.00503623	10449	0.0732207	10449	0.0303527	10449	0.115504	10449	1.1554
10450	1.15762	10450	0.00270345	10450	0.0505195	10450	0.0134115	10450	0.10248	10450	0.753983
10451	0.920168	10451	0.00164152	10451	0.0451068	10451	0.00645739	10451	0.102209	10451	0.559336
10452	0.850946	10452	0.00119142	10452	0.0538025	10452	0.00377574	10452	0.116828	10452	0.488681
10453	0.885264	10453	0.00104319	10453	0.0860495	10453	0.00276213	10453	0.149943	10453	0.497421
10454	0.967124	10454	0.00106357	10454	0.148138	10454	0.0024199	10454	0.205741	10454	0.564555
10455	1.03198	10455	0.00118683	10455	0.236848	10455	0.00234935	10455	0.284603	10455	0.67764
10456	1.02448	10456	0.00136086	10456	0.332542	10456	0.00236352	10456	0.377265	10456	0.825707
10457	0.934913	10457	0.00153542	10457	0.379608	10457	0.00238661	10457	0.464067	10457	1.00213
10458	0.801906	10458	0.00168015	10458	0.331741	10458	0.00242657	10458	0.523706	10458	1.21371
10459	0.674613	10459	0.00180042	10459	0.241733	10459	0.00253913	10459	0.544399	10459	1.48888
10460	0.58194	10460	0.00192569	10460	0.195516	10460	0.00279051	10460	0.526341	10460	1.88236
10461	0.530887	10461	0.00208027	10461	0.185129	10461	0.00323957	10461	0.476052	10461	2.47885
10462	0.517715	10462	0.00225877	10462	0.161386	10462	0.00393475	10462	0.401941	10462	3.39491
10463	0.536401	10463	0.0024193	10463	0.126304	10463	0.00491685	10463	0.314879	10463	4.76687
10464	0.581745	10464	0.00250273	10464	0.104464	10464	0.00622651	10464	0.228806	10464	6.70103
10465	0.648947	10465	0.00247247	10465	0.0961306	10465	0.00790238	10465	0.156566	10465	9.16632
10466	0.730348	10466	0.00234095	10466	0.0851076	10466	0.00992641	10466	0.104317	10466	11.8578
10467	0.810032	10467	0.00215675	10467	0.0656903	10467	0.0120769	10467	0.0707548	10467	14.1558
10468	0.860959	10468	0.00197334	10468	0.045959	10468	0.0137661	10468	0.0508799	10468	15.3504
10469	0.853784	10469	0.00183482	10469	0.0316631	10469	0.0141625	10469	0.0396913	10469	15.0941
10470	0.77876	10470	0.00178586	10470	0.0219643	10470	0.0128195	10470	0.0336463	10470	13.6902
10471	0.659991	10471	0.00189486	10471	0.0146047	10471	0.0102533	10471	0.0306536	10471	11.8762
10472	0.540706	10472	0.00229227	10472	0.00933851	10472	0.00757857	10472	0.0296818	10472	10.3368
10473	0.455395	10473	0.00324769	10473	0.00787457	10473	0.00561491	10473	0.0303793	10473	9.42858
10474	0.419648	10474	0.00529414	10474	0.0118979	10474	0.00458654	10474	0.0326945	10474	9.2021
10475	0.4391	10475	0.00924123	10475	0.0216027	10475	0.00445228	10475	0.0364326	10475	9.4871
10476	0.519484	10476	0.0155197	10476	0.0321517	10476	0.00527338	10476	0.0407737	10476	9.90572
10477	0.666687	10477	0.0225643	10477	0.0352679	10477	0.0074134	10477	0.044063	10477	9.92792
10478	0.876035	10478	0.0264696	10478	0.0289103	10478	0.0116176	10478	0.0444208	10478	9.14446
10479	1.1201	10479	0.0245812	10479	0.0200001	10479	0.0189098	10479	0.0410246	10479	7.6009
10480	1.35116	10480	0.0186105	10480	0.0166858	10480	0.0301103	10480	0.034745	10480	5.76505
10481	1.52088	10481	0.0122052	10481	0.0223534	10481	0.0448566	10481	0.0273683	10481	4.1311
10482	1.5977	10482	0.00743016	10482	0.038137	10482	0.060432	10482	0.0204139	10482	2.93278
10483	1.56987	10483	0.00445537	10483	0.0764916	10483	0.0715738	10483	0.0146631	10483	2.1668
10484	1.44411	10484	0.0027474	10484	0.175228	10484	0.0729377	10484	0.0103293	10484	1.73929
10485	1.2486	10485	0.00180072	10485	0.370586	10485	0.0635277	10485	0.00733607	10485	1.56603
10486	1.02963	10486	0.00129696	10486	0.660617	10486	0.0481765	10486	0.00548516	10486	1.60762
10487	0.833942	10487	0.00106472	10487	1.03036	10487	0.0334075	10487	0.00456333	10487	1.87221
10488	0.689854	10488	0.0010249	10488	1.47152	10488	0.0227775	10488	0.00444331	10488	2.3987
10489	0.603167	10489	0.00115571	10489	1.95895	10489	0.016458	10489	0.00517083	10489	3.20102
10490	0.564382	10490	0.0014584	10490	2.30269	10490	0.0132357	10490	0.00699855	10490	4.15654
10491	0.554806	10491	0.00188971	10491	2.14508	10491	0.0118846	10491	0.0102346	10491	4.92331
10492	0.548568	10492	0.00227247	10492	1.49632	10492	0.0114404	10492	0.0146803	10492	5.09204
10493	0.518612	10493	0.00233682	10493	0.871941	10493	0.0111019	10493	0.0189177	10493	4.55393
10494	0.451522	10494	0.00198838	10494	0.645566	10494	0.0102928	10494	0.0207696	10494	3.62643
10495	0.358019	10495	0.00144748	10495	0.787819	10495	0.00888134	10495	0.0193134	10495	2.74015
10496	0.263196	10496	0.000995919	10496	1.14741	10496	0.00718233	10496	0.0158301	10496	2.13149
10497	0.186743	10497	0.000747477	10497	1.61735	10497	0.00563443	10497	0.0122983	10497	1.83935
10498	0.134551	10498	0.000704968	10498	2.02467	10498	0.00450737	10498	0.00984926	10498	1.83895
10499	0.103461	10499	0.000910014	10499	2.15904	10499	0.00387014	10499	0.00872814	10499	2.12909
10500	0.0883058	10500	0.00160282	10500	2.07041	10500	0.00370801	10500	0.00889509	10500	2.74434
10501	0.0855855	10501	0.00354641	10501	1.94052	10501	0.00402873	10501	0.0104244	10501	3.70585
10502	0.0943316	10502	0.00871899	10502	1.74316	10502	0.00490686	10502	0.0136219	10502	4.92113
10503	0.115625	10503	0.0211002	10503	1.51604	10503	0.00645577	10503	0.0189681	10503	6.09789
10504	0.150801	10504	0.0457371	10504	1.66497	10504	0.00869434	10504	0.0269312	10504	6.80934
10505	0.197591	10505	0.0836962	10505	2.62792	10505	0.0113138	10505	0.037703	10505	6.75842
10506	0.245498	10506	0.126071	10506	4.35566	10506	0.0135416	10506	0.0509532	10506	6.01694
10507	0.276226	10507	0.156905	10507	5.95048	10507	0.0144281	10507	0.0656455	10507	4.96085
10508	0.273901	10508	0.165726	10508	6.22165	10508	0.0134997	10508	0.0799179	10508	3.98118
10509	0.237587	10509	0.155011	10509	5.23729	10509	0.0111381	10509	0.091268	10509	3.2908
10510	0.182119	10510	0.135049	10510	4.12331	10510	0.00826299	10510	0.0974791	10510	2.93875
10511	0.126518	10511	0.115255	10511	3.24791	10511	0.0056996	10511	0.0980939	10511	2.90681
10512	0.0828342	10512	0.10054	10512	2.35086	10512	0.00383014	10512	0.0951483	10512	3.17312
10513	0.0537836	10513	0.092114	10513	1.66827	10513	0.00265247	10513	0.0922593	10513	3.72181
10514	0.0366244	10514	0.0891146	10514	1.7442	10514	0.00200153	10514	0.0930143	10514	4.5227
10515	0.0274356	10515	0.0893269	10515	2.9073	10515	0.00171369	10515	0.10008	10515	5.51763
10516	0.0231682	10516	0.0892794	10516	4.83331	10516	0.00168747	10516	0.114971	10516	6.64705
10517	0.0219008	10517	0.0850386	10517	6.20922	10517	0.00188648	10517	0.137481	10517	7.91148
10518	0.022415	10518	0.0744837	10518	6.0779	10518	0.00233338	10518	0.164711	10518	9.41623
10519	0.0237714	10519	0.0592422	10519	6.01842	10519	0.00312421	10519	0.19141	10519	11.3553
10520	0.0251645	10520	0.043503	10520	10.3369	10520	0.00448168	10520	0.213092	10520	13.9342
10521	0.0260563	10521	0.0307608	10521	24.7277	10521	0.00685445	10521	0.229824	10521	17.2508
10522	0.0263357	10522	0.0221435	10522	56.7522	10522	0.0110331	10522	0.246831	10522	21.1825
10523	0.0262648	10523	0.0171137	10523	121.774	10523	0.018132	10523	0.27197	10523	25.3934
10524	0.0262558	10524	0.0147279	10524	242.089	10524	0.0291036	10524	0.313158	10524	29.5572
10525	0.0266772	10525	0.014306	10525	393.417	10525	0.0436683	10525	0.377183	10525	33.6795
10526	0.0277876	10526	0.0155919	10526	454.594	10526	0.0596789	10526	0.469536	10526	38.2462
10527	0.0297642	10527	0.0187677	10527	351.056	10527	0.0744909	10527	0.596035	10527	44.0773
10528	0.0327648	10528	0.0245345	10528	191.31	10528	0.0875802	10528	0.768204	10528	51.9739
10529	0.0369787	10529	0.0343188	10529	98.2829	10529	0.101605	10529	1.01179	10529	62.1716
10530	0.0426192	10530	0.0504705	10530	67.6374	10530	0.121263	10530	1.37156	10530	73.5371
10531	0.0497793	10531	0.0758175	10531	53.1273	10531	0.151313	10531	1.89536	10531	82.885
10532	0.0580673	10532	0.111074	10532	38.9784	10532	0.193386	10532	2.56507	10532	85.6512
10533	0.0660962	10533	0.149183	10533	29.6102	10533	0.240265	10533	3.16788	10533	78.8073
10534	0.0713222	10534	0.172087	10534	26.1237	10534	0.272305	10534	3.27982	10534	63.92
10535	0.071017	10535	0.162165	10535	23.1147	10535	0.26837	10535	2.64476	10535	46.4348
10536	0.0642527	10536	0.122801	10536	18.1546	10536	0.227888	10536	1.5995	10536	31.5085
10537	0.052993	10537	0.0768517	10537	13.4712	10537	0.173373	10537	0.735842	10537	21.1863
10538	0.0407728	10538	0.0426337	10538	11.7693	10538	0.127809	10538	0.276128	10538	14.9573
10539	0.0303834	10539	0.0230476	10539	14.5525	10539	0.0999998	10539	0.0948403	10539	11.4854
10540	0.022875	10540	0.0133109	10540	21.8413	10540	0.08906	10540	0.0341829	10540	9.58914
10541	0.0180587	10541	0.0087658	10541	29.517	10541	0.0926885	10541	0.0146689	10541	8.42902
10542	0.0153398	10542	0.00678412	10542	30.0412	10542	0.110831	10542	0.00817237	10542	7.45341
10543	0.0141997	10543	0.00619137	10543	21.8794	10543	0.146047	10543	0.00609743	10543	6.38879
10544	0.0143288	10544	0.00658777	10544	12.0714	10544	0.202546	10544	0.00595002	10544	5.23279
10545	0.0155889	10545	0.00799749	10545	6.09599	10545	0.283876	10545	0.00711104	10545	4.13912
10546	0.0178966	10546	0.010705	10546	3.76797	10546	0.387714	10546	0.00951528	10546	3.25259
10547	0.021059	10547	0.0150883	10547	3.54956	10547	0.497842	10547	0.0129734	10547	2.62863
10548	0.0246223	10548	0.0213456	10548	4.56608	10548	0.581028	10548	0.0166316	10548	2.25265
10549	0.0278746	10549	0.029273	10549	6.09261	10549	0.601655	10549	0.019016	10549	2.08837
10550	0.0301053	10550	0.0384345	10550	7.0242	10550	0.548958	10550	0.0190021	10550	2.10832
10551	0.0309728	10551	0.0486314	10551	6.39447	10551	0.446368	10551	0.0167185	10551	2.3013
10552	0.0306564	10552	0.0600063	10552	4.7771	10552	0.33072	10552	0.0132533	10552	2.6636
10553	0.0296749	10553	0.0724514	10553	3.6268	10553	0.228142	10553	0.00972215	10553	3.17892
10554	0.0285863	10554	0.084865	10554	3.50113	10554	0.148386	10554	0.00677053	10554	3.79671
10555	0.027817	10555	0.0952772	10555	4.32009	10555	0.0913844	10555	0.00461457	10555	4.43147
10556	0.0276746	10556	0.102293	10556	6.10378	10556	0.0535765	10556	0.00322437	10556	5.00262
10557	0.0284681	10557	0.106674	10557	9.21481	10557	0.030483	10557	0.00246923	10557	5.49657
10558	0.0306616	10558	0.111358	10558	14.54	10558	0.0175445	10558	0.00298008	10558	6.00073
10559	0.0350518	10559	0.120181	10559	23.1205	10559	0.0108664	10559	0.00364349	10559	6.68978
10560	0.0430271	10560	0.136747	10560	35.198	10560	0.00775315	10560	0.00781982	10560	7.79573
10561	0.0570187	10561	0.163791	10561	48.7877	10561	0.0067144	10561	0.0183971	10561	9.5879
10562	0.081265	10562	0.202002	10562	61.8359	10562	0.00717408	10562	0.0431416	10562	12.3331
10563	0.122972	10563	0.247663	10563	77.0691	10563	0.00920763	10563	0.124769	10563	16.1612
10564	0.193757	10564	0.290424	10564	102.667	10564	0.0133609	10564	0.179992	10564	20.7983
10565	0.310764	10565	0.314953	10565	144.654	10565	0.0203337	10565	0.206984	10565	25.3303
10566	0.495946	10566	0.308937	10566	185.524	10566	0.0302649	10566	0.740779	10566	28.3913
10567	0.771236	10567	0.272307	10567	188.439	10567	0.0418411	10567	0.872009	10567	28.9471
10568	1.14853	10568	0.217754	10568	148.313	10568	0.052223	10568	0.323831	10568	27.0613
10569	1.61841	10569	0.161444	10569	101.196	10569	0.058443	10569	1.43828	10569	23.8173
10570	2.14706	10570	0.113953	10570	75.757	10570	0.0592103	10570	0.599094	10570	20.5275
10571	2.68625	10571	0.0784203	10571	73.0291	10571	0.0554039	10571	0.119492	10571	18.0866
10572	3.18588	10572	0.0535332	10572	82.8788	10572	0.0490536	10572	0.0518918	10572	16.8825
10573	3.5922	10573	0.0366778	10573	102.053	10573	0.0420324	10573	0.049773	10573	17.0153
10574	3.83367	10574	0.0254855	10574	136.947	10574	0.0354213	10574	0.0188236	10574	18.4816
10575	3.82349	10575	0.0181924	10575	200.037	10575	0.0295747	10575	0.0223575	10575	21.1947
10576	3.50622	10576	0.0135497	10576	304.707	10576	0.0244756	10576	0.0262262	10576	24.8656
10577	2.92353	10577	0.0106762	10577	411.599	10577	0.0200543	10577	0.0143506	10577	28.8804
10578	2.22174	10578	0.00895189	10578	422.709	10578	0.0163352	10578	0.0113286	10578	32.3729
10579	1.57069	10579	0.00794425	10579	320.209	10579	0.0134225	10579	0.0069117	10579	34.5826
10580	1.07268	10580	0.00736198	10580	199.453	10580	0.0114266	10580	0.00794669	10580	35.2658
10581	0.742842	10581	0.00704654	10581	124.162	10581	0.0104445	10581	0.00764262	10581	34.7836
10582	0.547678	10582	0.00699087	10582	82.8769	10582	0.0106377	10582	0.0133673	10582	33.7828
10583	0.44589	10583	0.00735605	10583	56.0689	10583	0.0124024	10583	0.0107977	10583	32.7591
10584	0.406367	10584	0.00848942	10584	39.6227	10584	0.016613	10584	0.0432091	10584	31.7972
10585	0.408596	10585	0.0109914	10585	33.97	10585	0.0248215	10585	0.0498408	10585	30.5802
10586	0.435684	10586	0.0158016	10586	36.9789	10586	0.0388083	10586	0.0546555	10586	28.6598
10587	0.467011	10587	0.0239976	10587	39.6438	10587	0.0581803	10587	0.0815598	10587	25.8744
10588	0.47792	10588	0.0357302	10588	33.47	10588	0.0763115	10588	0.169719	10588	22.5969
10589	0.451115	10589	0.0485358	10589	21.3233	10589	0.0813076	10589	0.277237	10589	19.5474
10590	0.3899	10590	0.0575387	10590	11	10590	0.0677247	10590	0.175583	10590	17.3827
10591	0.315388	10591	0.0592229	10591	5.24562	10591	0.0445349	10591	0.167008	10591	16.4819
10592	0.24951	10592	0.0545536	10592	2.74056	10592	0.0245828	10592	0.114146	10592	17.0094
10593	0.203227	10593	0.0472802	10593	1.84181	10593	0.0126286	10593	0.0756119	10593	19.0295
10594	0.177393	10594	0.0405034	10594	1.85065	10594	0.00680155	10594	0.0982108	10594	22.4945
10595	0.168259	10595	0.0354699	10595	2.74117	10595	0.00423389	10595	0.212344	10595	27.1192
10596	0.170617	10596	0.0322408	10596	4.49979	10596	0.00318245	10596	0.449401	10596	32.3107
10597	0.178185	10597	0.0305971	10597	6.79642	10597	0.00284196	10597	0.529909	10597	37.3225
10598	0.184046	10598	0.0305649	10598	9.38906	10598	0.00286087	10598	0.934564	10598	41.5756
10599	0.183168	10599	0.0326065	10599	14.0286	10599	0.00307846	10599	1.69878	10599	44.8781
10600	0.175368	10600	0.0376365	10600	26.5576	10600	0.00343832	10600	1.26199	10600	47.3737
10601	0.164987	10601	0.0469101	10601	54.573	10601	0.00397356	10601	0.587167	10601	49.2964
10602	0.157409	10602	0.0615206	10602	103.349	10602	0.00479486	10602	0.436824	10602	50.7036
10603	0.156111	10603	0.0811142	10603	179.778	10603	0.00605811	10603	0.362249	10603	51.3196
10604	0.161901	10604	0.102356	10604	299.878	10604	0.00789976	10604	0.260464	10604	50.5927
10605	0.173345	10605	0.119356	10605	476.592	10605	0.0103277	10605	0.40919	10605	48.0147
10606	0.187679	10606	0.127193	10606	694.147	10606	0.013125	10606	0.383625	10606	43.5637
10607	0.202485	10607	0.125114	10607	890.832	10607	0.0159175	10607	0.571909	10607	37.8995
10608	0.217772	10608	0.115773	10608	967.987	10608	0.018443	10608	1.1199	10608	32.0763
10609	0.237172	10609	0.10226	10609	889.907	10609	0.0207838	10609	1.77138	10609	27.0224
10610	0.267822	10610	0.0865546	10610	740.098	10610	0.0233182	10610	3.71907	10610	23.2336
10611	0.319974	10611	0.0699422	10611	596.749	10611	0.0264429	10611	7.71753	10611	20.8094
10612	0.406816	10612	0.0537831	10612	476.096	10612	0.0302288	10612	20.8981	10612	19.6517
10613	0.542773	10613	0.0394792	10613	381.451	10613	0.0340996	10613	103.906	10613	19.642
10614	0.736719	10614	0.0279232	10614	295.139	10614	0.0367338	10614	86.0227	10614	20.744
10615	0.979392	10615	0.0192457	10615	201.7	10615	0.0365787	10615	66.7198	10615	23.0466
10616	1.23486	10616	0.0130618	10616	120.023	10616	0.03297	10616	42.8227	10616	26.7508
10617	1.45337	10617	0.00884465	10617	66.4731	10617	0.0268893	10617	90.8121	10617	32.0656
10618	1.60535	10618	0.00613297	10618	36.4814	10618	0.02038	10618	103.153	10618	38.9542
10619	1.70701	10619	0.00457848	10619	21.4957	10619	0.0151855	10619	90.0121	10619	46.745
10620	1.81428	10620	0.00397328	10620	15.6659	10620	0.012047	10620	122.296	10620	53.8549
10621	1.99896	10621	0.00437782	10621	15.401	10621	0.0110547	10621	151.939	10621	58.0943
10622	2.32967	10622	0.00654641	10622	18.4164	10622	0.0123887	10622	276.904	10622	57.7091
10623	2.8554	10623	0.0134239	10623	22.5598	10623	0.0169453	10623	167.552	10623	52.4572
10624	3.57352	10624	0.0356066	10624	25.9589	10624	0.0266895	10624	642.784	10624	43.7494
10625	4.39005	10625	0.109691	10625	26.935	10625	0.0440934	10625	447.98	10625	33.7918
10626	5.12807	10626	0.347646	10626	25.1744	10626	0.0694499	10626	1816.13	10626	24.5273
10627	5.62045	10627	1.01905	10627	23.5929	10627	0.0970813	10627	1404.58	10627	17.0548
10628	5.8058	10628	2.54509	10628	26.0764	10628	0.116007	10628	1370.52	10628	11.6203
10629	5.71914	10629	5.08724	10629	33.9496	10629	0.117558	10629	941.637	10629	7.93433
10630	5.40784	10630	7.73186	10630	44.398	10630	0.102083	10630	377.431	10630	5.52355
10631	4.88659	10631	8.5681	10631	51.7545	10631	0.0775847	10631	332.822	10631	3.95499
10632	4.17436	10632	6.74855	10632	52.6735	10632	0.0533617	10632	165.335	10632	2.91692
10633	3.35367	10633	3.79958	10633	49.0445	10633	0.0350234	10633	49.872	10633	2.21502
10634	2.56517	10634	1.6167	10634	45.8624	10634	0.0236576	10634	11.3466	10634	1.7385
10635	1.93456	10635	0.588449	10635	47.9743	10635	0.017933	10635	3.14023	10635	1.42588
10636	1.51826	10636	0.223923	10636	57.0165	10636	0.0164143	10636	1.51005	10636	1.24208
10637	1.31791	10637	0.115178	10637	70.3763	10637	0.0188462	10637	0.388883	10637	1.16832
10638	1.33276	10638	0.102844	10638	80.9251	10638	0.0271335	10638	0.415147	10638	1.20086
10639	1.61501	10639	0.187226	10639	79.5591	10639	0.0478494	10639	0.955297	10639	1.35456
10640	2.3361	10640	0.704311	10640	66.4045	10640	0.100335	10640	1.68665	10640	1.66958
10641	3.89402	10641	4.74109	10641	51.7936	10641	0.241855	10641	10.9185	10641	2.21913
10642	7.05245	10642	44.2876	10642	41.9267	10642	0.636919	10642	89.1057	10642	3.11051
10643	12.9256	10643	433.976	10643	36.8446	10643	1.69127	10643	740.242	10643	4.45765
10644	22.3192	10644	3528.5	10644	36.289	10644	4.07809	10644	5885.75	10644	6.29202
10645	34.1538	10645	20260.6	10645	38.1742	10645	8.03043	10645	26330	10645	8.41223
10646	44.417	10646	74948.7	10646	38.1531	10646	11.9445	10646	84465.4	10646	10.2915
10647	48.3082	10647	171964	10647	34.9217	10647	13.054	10647	172810	10647	11.2532
10648	44.4561	10648	244904	10648	34.5152	10648	10.8109	10648	206945	10648	10.9125
10649	35.8578	10649	222687	10649	44.5371	10649	7.35391	10649	158456	10649	9.47808
10650	26.602	10650	135733	10650	62.3954	10650	4.56343	10650	85245.4	10650	7.56957
10651	19.0308	10651	59220.5	10651	77.0344	10651	2.83714	10651	30974.6	10651	5.77884
10652	13.5979	10652	20065.1	10652	83.2289	10652	1.8624	10652	10588.7	10652	4.41737
10653	9.90023	10653	5816.61	10653	84.2531	10653	1.29725	10653	3898.3	10653	3.5477
10654	7.42393	10654	1609.82	10654	89.2466	10654	0.938834	10654	1167.4	10654	3.12429
10655	5.79536	10655	476.723	10655	113.066	10655	0.696262	10655	375.894	10655	3.10311
10656	4.78331	10656	167.363	10656	159.262	10656	0.537441	10656	186.914	10656	3.49118
10657	4.24408	10657	74.8825	10657	210.224	10657	0.450417	10657	135.194	10657	4.34615
10658	4.07835	10658	44.0042	10658	253.238	10658	0.428305	10658	80.2261	10658	5.72133
10659	4.19811	10659	33.6041	10659	297.047	10659	0.469108	10659	115.566	10659	7.55743
10660	4.48934	10660	32.1125	10660	343.519	10660	0.574386	10660	203.328	10660	9.60388
10661	4.7849	10661	36.6559	10661	362.169	10661	0.736298	10661	302.319	10661	11.5153
10662	4.89338	10662	48.0595	10662	323.844	10662	0.916487	10662	563.957	10662	13.1069
10663	4.6964	10663	70.6422	10663	247.715	10663	1.04433	10663	865.05	10663	14.5218
10664	4.22733	10664	114.941	10664	179.765	10664	1.05987	10664	1520.53	10664	16.1705
10665	3.63686	10665	204.365	10665	140.203	10665	0.964942	10665	2065.55	10665	18.5878
10666	3.08453	10666	387.14	10666	117.39	10666	0.81783	10666	4829.9	10666	22.3724
10667	2.66626	10667	748.438	10667	97.9198	10667	0.682833	10667	4456.17	10667	28.2159
10668	2.41231	10668	1394.69	10668	82.3764	10668	0.596914	10668	6154.71	10668	36.9274
10669	2.31632	10669	2356.17	10669	75.1827	10669	0.572264	10669	6814.07	10669	49.31
10670	2.35689	10670	3416.34	10670	73.4527	10670	0.610554	10670	9128.85	10670	65.663
10671	2.50114	10671	4084.41	10671	70.0591	10671	0.707129	10671	8717.69	10671	84.7044
10672	2.69564	10672	3943.41	10672	64.391	10672	0.838679	10672	4528.79	10672	102.301
10673	2.8598	10673	3075.26	10673	61.7586	10673	0.945001	10673	2799.94	10673	111.756
10674	2.90183	10674	1979.02	10674	63.5829	10674	0.941242	10674	1368.07	10674	107.584
10675	2.76364	10675	1095.75	10675	68.1281	10675	0.785947	10675	457.75	10675	90.6217
10676	2.46297	10676	554.229	10676	73.2435	10676	0.537504	10676	139.702	10676	68.1636
10677	2.08704	10677	275.588	10677	75.1042	10677	0.304741	10677	25.3399	10677	48.1104
10678	1.73975	10678	145.749	10678	71.8939	10678	0.150543	10678	7.02691	10678	34.2054
10679	1.49507	10679	88.1737	10679	64.8783	10679	0.0705936	10679	2.57238	10679	26.4008
10680	1.39196	10680	64.4551	10680	55.4876	10680	0.0351604	10680	0.941148	10680	23.4129
10681	1.45988	10681	58.4729	10681	46.1893	10681	0.0209217	10681	0.399042	10681	24.3521
10682	1.74943	10682	65.358	10682	40.603	10682	0.0162381	10682	0.38519	10682	29.0588
10683	2.34902	10683	86.4179	10683	39.9061	10683	0.016795	10683	0.449533	10683	37.5842
10684	3.35762	10684	126.527	10684	42.7681	10684	0.0218026	10684	0.685017	10684	48.9715
10685	4.76859	10685	190.106	10685	47.4197	10685	0.0315128	10685	1.52323	10685	60.0528
10686	6.30228	10686	273.797	10686	49.4305	10686	0.0444141	10686	3.26976	10686	66.2543
10687	7.42884	10687	361.007	10687	43.9064	10687	0.05528	10687	6.42152	10687	64.9995
10688	7.7474	10688	428.123	10688	32.4239	10688	0.0584417	10688	6.88199	10688	57.9891
10689	7.33405	10689	460.298	10689	21.1094	10689	0.0537583	10689	6.98299	10689	49.2974
10690	6.60782	10690	460.108	10690	13.7426	10690	0.0461448	10690	8.88445	10690	42.0945
10691	5.95992	10691	441.881	10691	10.0571	10691	0.0402663	10691	10.3617	10691	37.5021
10692	5.5826	10692	421.733	10692	8.5939	10692	0.0382605	10692	20.0697	10692	35.219
10693	5.51507	10693	412.696	10693	9.84524	10693	0.0408145	10693	29.9225	10693	34.307
10694	5.73678	10694	425.075	10694	16.4577	10694	0.0484488	10694	33.0305	10694	33.6879
10695	6.23434	10695	468.397	10695	29.2455	10695	0.0619463	10695	57.6102	10695	32.5989
10696	7.04726	10696	551.722	10696	43.7799	10696	0.082305	10696	102.265	10696	30.9825
10697	8.30264	10697	678.65	10697	53.4509	10697	0.110704	10697	111.502	10697	29.4793
10698	10.233	10698	833.627	10698	53.6569	10698	0.148444	10698	230.791	10698	29.0313
10699	13.1504	10699	965.713	10699	44.7753	10699	0.195951	10699	352.603	10699	30.5173
10700	17.3082	10700	997.085	10700	32.5227	10700	0.249632	10700	214.474	10700	34.5936
10701	22.5603	10701	878.976	10701	21.4412	10701	0.297471	10701	228.006	10701	41.4154
10702	27.9246	10702	648.628	10702	12.5944	10702	0.319465	10702	228.373	10702	49.8853
10703	31.6136	10703	404.291	10703	6.77251	10703	0.300142	10703	118.539	10703	56.9203
10704	32.0654	10704	221.322	10704	4.01723	10704	0.245029	10704	96.6296	10704	58.4424
10705	29.228	10705	113.518	10705	3.36239	10705	0.178502	10705	29.7209	10705	52.5909
10706	24.5659	10706	58.985	10706	4.27874	10706	0.123197	10706	10.7504	10706	41.7024
10707	19.8349	10707	33.3744	10707	6.8027	10707	0.087327	10707	5.90432	10707	30.143
10708	16.1121	10708	21.5308	10708	10.8635	10708	0.0689174	10708	3.52533	10708	20.9143
10709	13.7381	10709	15.9816	10709	15.0117	10709	0.0643125	10709	2.13236	10709	14.7287
10710	12.6976	10710	13.343	10710	16.1746	10710	0.0730212	10710	2.53624	10710	11.0395
10711	12.9404	10711	12.065	10711	13.1893	10711	0.100508	10711	1.89543	10711	9.08474
10712	14.5077	10712	11.383	10712	8.76187	10712	0.162435	10712	1.41576	10712	8.30446
10713	17.4584	10713	10.8676	10713	5.62915	10713	0.291061	10713	1.67543	10713	8.36961
10714	21.5581	10714	10.2187	10714	4.02266	10714	0.534213	10714	2.1137	10714	9.07927
10715	25.8269	10715	9.20413	10715	3.07677	10715	0.916211	10715	3.51704	10715	10.2274
10716	28.5364	10716	7.73603	10716	2.12783	10716	1.34533	10716	8.63143	10716	11.49
10717	28.2987	10717	5.98043	10717	1.14093	10717	1.58844	10717	8.76412	10717	12.4209
10718	25.385	10718	4.29481	10718	0.45325	10718	1.47692	10718	4.05998	10718	12.624
10719	21.4773	10719	2.98351	10719	0.14799	10719	1.11326	10719	2.20884	10719	11.9896
10720	18.1973	10720	2.13662	10720	0.0479649	10720	0.732697	10720	2.07835	10720	10.7521
10721	16.2763	10721	1.68423	10721	0.0169695	10721	0.465884	10721	1.25219	10721	9.30768
10722	15.7194	10722	1.52251	10722	0.00643882	10722	0.316346	10722	2.68899	10722	7.99243
10723	16.1398	10723	1.5784	10723	0.00297923	10723	0.246596	10723	3.79983	10723	6.99185
10724	16.8779	10724	1.80766	10724	0.0026481	10724	0.227703	10724	3.93028	10724	6.37239
10725	17.1333	10725	2.16348	10725	0.00433394	10725	0.247889	10725	6.36131	10725	6.14668
10726	16.3586	10726	2.56839	10726	0.00788905	10726	0.309858	10726	6.984	10726	6.3174
10727	14.6427	10727	2.9138	10727	0.0144967	10727	0.428438	10727	6.21741	10727	6.88393
10728	12.582	10728	3.08878	10728	0.0316365	10728	0.625798	10728	9.39609	10728	7.80566
10729	10.7696	10729	3.01628	10729	0.079151	10729	0.912054	10729	9.2893	10729	8.92308
10730	9.46235	10730	2.68273	10730	0.180006	10730	1.24055	10730	11.8856	10730	9.88372
10731	8.58117	10731	2.1546	10731	0.325818	10731	1.47115	10731	15.1117	10731	10.1994
10732	7.84567	10732	1.56086	10732	0.472528	10732	1.43886	10732	10.276	10732	9.52538
10733	6.94199	10733	1.03266	10733	0.573475	10733	1.12743	10733	4.78817	10733	7.9726
10734	5.7308	10734	0.642727	10734	0.598357	10734	0.713376	10734	3.04852	10734	6.07351
10735	4.36198	10735	0.394433	10735	0.587795	10735	0.383135	10735	1.52463	10735	4.39051
10736	3.13211	10736	0.25355	10736	0.63749	10736	0.190999	10736	0.547965	10736	3.20239
10737	2.2377	10737	0.182399	10737	0.777261	10737	0.0993409	10737	0.410038	10737	2.5157
10738	1.69986	10738	0.15581	10738	1.04409	10738	0.0608184	10738	0.246054	10738	2.23121
10739	1.45235	10739	0.163937	10739	1.54649	10739	0.048086	10739	0.142683	10739	2.25637
10740	1.43333	10740	0.212457	10740	2.09417	10740	0.0509648	10740	0.187723	10740	2.51775
10741	1.61869	10741	0.325482	10741	2.17858	10741	0.070479	10741	0.592769	10741	2.90981
10742	2.01538	10742	0.54754	10742	1.70187	10742	0.117768	10742	1.48434	10742	3.24558
10743	2.6358	10743	0.925844	10743	1.05831	10743	0.215476	10743	2.73694	10743	3.30477
10744	3.46605	10744	1.44793	10744	0.550973	10744	0.39318	10744	4.87382	10744	2.98838
10745	4.44572	10745	1.96774	10745	0.261791	10745	0.665482	10745	5.9564	10745	2.40487
10746	5.46971	10746	2.25008	10746	0.148599	10746	0.996626	10746	7.91649	10746	1.76529
10747	6.39981	10747	2.1664	10747	0.130937	10747	1.28747	10747	11.9594	10747	1.22566
10748	7.07087	10748	1.81081	10748	0.198803	10748	1.42101	10748	8.65621	10748	0.836482
10749	7.31244	10749	1.38468	10749	0.441358	10749	1.34376	10749	4.96884	10749	0.581662
10750	7.02305	10750	1.03153	10750	0.887149	10750	1.10734	10750	13.6336	10750	0.426083
10751	6.26792	10751	0.79627	10751	1.14341	10751	0.825452	10751	20.8202	10751	0.339353
10752	5.28742	10752	0.670007	10752	0.854498	10752	0.592429	10752	14.0472	10752	0.301822
10753	4.37048	10753	0.634353	10753	0.40686	10753	0.444136	10753	17.9725	10753	0.303682
10754	3.71292	10754	0.680068	10754	0.282042	10754	0.376301	10754	15.9685	10754	0.341679
10755	3.38294	10755	0.806736	10755	0.50287	10755	0.376766	10755	17.4253	10755	0.412557
10756	3.36533	10756	1.00793	10756	0.978584	10756	0.440795	10756	30.9777	10756	0.501291
10757	3.59113	10757	1.24556	10757	1.56924	10757	0.566309	10757	39.3229	10757	0.570898
10758	3.91847	10758	1.43809	10758	1.81429	10758	0.735415	10758	77.9506	10758	0.57474
10759	4.12268	10759	1.49968	10759	1.42702	10759	0.902181	10759	51.2085	10759	0.495799
10760	3.99261	10760	1.40796	10760	0.840037	10760	1.0147	10760	62.1863	10760	0.367319
10761	3.49828	10761	1.2168	10761	0.45981	10761	1.05628	10761	83.0523	10761	0.241452
10762	2.82207	10762	1.00131	10762	0.261042	10762	1.05287	10762	75.9977	10762	0.148502
10763	2.1944	10763	0.808602	10763	0.209775	10763	1.04231	10763	56.2106	10763	0.0908324
10764	1.74318	10764	0.651883	10764	0.331939	10764	1.04638	10764	38.4628	10764	0.0584903
10765	1.48635	10765	0.526415	10765	0.513959	10765	1.06242	10765	21.8428	10765	0.0414187
10766	1.39173	10766	0.423377	10766	0.520775	10766	1.06731	10766	12.3353	10766	0.0330541
10767	1.4157	10767	0.33606	10767	0.33261	10767	1.03067	10767	7.1309	10767	0.0298289
10768	1.50729	10768	0.261176	10768	0.158909	10768	0.936077	10768	5.59706	10768	0.0299673
10769	1.60237	10769	0.198257	10769	0.102027	10769	0.796414	10769	6.13431	10769	0.0325695
10770	1.63467	10770	0.148289	10770	0.130966	10770	0.646459	10770	7.19021	10770	0.0370223
10771	1.56735	10771	0.112031	10771	0.204807	10771	0.519562	10771	7.94539	10771	0.0426276
10772	1.41474	10772	0.0889842	10772	0.304927	10772	0.432401	10772	7.92005	10772	0.0484115
10773	1.22808	10773	0.0777274	10773	0.465972	10773	0.386587	10773	12.8155	10773	0.0531444
10774	1.06162	10774	0.0771118	10774	0.734469	10774	0.377154	10774	15.8673	10774	0.0556404
10775	0.951823	10775	0.087263	10775	1.12852	10775	0.398451	10775	17.494	10775	0.0553064
10776	0.919079	10776	0.109849	10776	1.6239	10776	0.446652	10776	29.3449	10776	0.0526104
10777	0.980594	10777	0.14775	10777	2.23603	10777	0.52262	10777	24.9952	10777	0.0489958
10778	1.16277	10778	0.20505	10778	3.35064	10778	0.638114	10778	27.516	10778	0.0462393
10779	1.50621	10779	0.289018	10779	5.89644	10779	0.826006	10779	33.1782	10779	0.0458268
10780	2.05479	10780	0.414776	10780	11.7092	10780	1.15597	10780	35.393	10780	0.0487378
10781	2.81927	10781	0.610522	10781	21.6143	10781	1.75808	10781	23.452	10781	0.0553607
10782	3.72611	10782	0.917078	10782	29.6426	10782	2.84052	10782	43.8013	10782	0.0650209
10783	4.60297	10783	1.36877	10783	28.1674	10783	4.63016	10783	62.4154	10783	0.0752089
10784	5.2491	10784	1.94291	10784	20.9076	10784	7.10433	10784	54.5847	10784	0.0817693
10785	5.54785	10785	2.50578	10785	18.5574	10785	9.57074	10785	48.5891	10785	0.0812506
10786	5.51576	10786	2.84705	10786	27.9149	10786	10.7448	10786	70.11	10786	0.0737114
10787	5.25821	10787	2.83263	10787	47.2296	10787	9.8508	10787	75.1791	10787	0.0625653
10788	4.89918	10788	2.51566	10788	60.833	10788	7.52574	10788	13.7812	10788	0.0516986
10789	4.5445	10789	2.06908	10789	53.8726	10789	5.09192	10789	4.99444	10789	0.0432851
10790	4.27937	10790	1.64584	10790	34.1124	10790	3.34495	10790	3.15462	10790	0.0376892
10791	4.1768	10791	1.31745	10791	17.7741	10791	2.36805	10791	1.89324	10791	0.0342828
10792	4.30385	10792	1.09343	10792	9.15377	10792	1.98181	10792	1.30537	10792	0.0321056
10793	4.72214	10793	0.957866	10793	5.01401	10793	2.0732	10793	1.04474	10793	0.0302612
10794	5.47329	10794	0.890839	10794	2.69785	10794	2.71475	10794	1.27099	10794	0.0282455
10795	6.53452	10795	0.874832	10795	1.38683	10795	4.21587	10795	1.31947	10795	0.0261687
10796	7.75308	10796	0.893741	10796	0.81054	10796	7.08752	10796	3.2019	10796	0.0246876
10797	8.82683	10797	0.930525	10797	0.581865	10797	11.6638	10797	9.68321	10797	0.0247561
10798	9.41574	10798	0.967583	10798	0.4762	10798	17.2692	10798	12.365	10798	0.0275755
10799	9.34134	10799	0.991494	10799	0.447314	10799	21.875	10799	18.0488	10799	0.0349345
10800	8.68522	10800	0.999149	10800	0.429187	10800	23.5249	10800	49.4364	10800	0.0496635
10801	7.68922	10801	0.999359	10801	0.36785	10801	22.1992	10801	100.073	10801	0.0751428
10802	6.58167	10802	1.00753	10802	0.305686	10802	19.5168	10802	71.6271	10802	0.111756
10803	5.48726	10803	1.03694	10803	0.286992	10803	17.0226	10803	86.5935	10803	0.150002
10804	4.44535	10804	1.09074	10804	0.295571	10804	15.3124	10804	159.048	10804	0.169139
10805	3.47304	10805	1.15617	10805	0.309323	10805	14.1845	10805	114.589	10805	0.153356
10806	2.60885	10806	1.2039	10806	0.307505	10806	13.0351	10806	279.13	10806	0.111012
10807	1.90739	10807	1.19925	10807	0.263203	10807	11.2995	10807	141.438	10807	0.0663571
10808	1.4045	10808	1.12482	10808	0.189191	10808	8.92167	10808	142.8	10808	0.0352271
10809	1.09877	10809	0.995775	10809	0.131043	10809	6.4214	10809	77.2167	10809	0.0183701
10810	0.968315	10810	0.850311	10810	0.1074	10810	4.39287	10810	53.7339	10810	0.0104577
10811	1.00253	10811	0.725772	10811	0.106491	10811	3.06618	10811	33.3935	10811	0.00703794
10812	1.22765	10812	0.644921	10812	0.127612	10812	2.35234	10812	11.133	10812	0.00576794
10813	1.71928	10813	0.619086	10813	0.218657	10813	2.08178	10813	12.1253	10813	0.00562638
10814	2.58582	10814	0.659328	10814	0.526624	10814	2.13339	10814	6.36133	10814	0.00618755
10815	3.88677	10815	0.788546	10815	1.47698	10815	2.44016	10815	8.63012	10815	0.00726171
10816	5.48768	10816	1.05362	10816	4.26625	10816	2.94599	10816	5.28458	10816	0.00879489
10817	6.98547	10817	1.53533	10817	11.7561	10817	3.56772	10817	4.56123	10817	0.010902
10818	7.87303	10818	2.33943	10818	28.159	10818	4.19153	10818	4.84477	10818	0.0138884
10819	7.855	10819	3.52961	10819	54.9691	10819	4.69227	10819	2.88331	10819	0.0181102
10820	7.00552	10820	4.98244	10820	85.7827	10820	4.94132	10820	2.91022	10820	0.0235041
10821	5.65668	10821	6.28837	10821	105.059	10821	4.81298	10821	5.60213	10821	0.0287737
10822	4.1893	10822	6.94656	10822	100.396	10822	4.24163	10822	8.48292	10822	0.0311192
10823	2.88947	10823	6.78977	10823	77.8763	10823	3.31502	10823	9.00209	10823	0.0281273
10824	1.89787	10824	6.12405	10824	52.0666	10824	2.27874	10824	10.3168	10824	0.0207017
10825	1.22631	10825	5.41885	10825	30.0017	10825	1.39211	10825	9.44587	10825	0.0125757
10826	0.812192	10826	4.99757	10826	13.8781	10826	0.779458	10826	6.84985	10826	0.00663396
10827	0.575503	10827	5.00406	10827	4.82935	10827	0.420375	10827	11.5293	10827	0.0032766
10828	0.451945	10828	5.50964	10828	1.27297	10828	0.23344	10828	10.3035	10828	0.00164368
10829	0.401338	10829	6.60566	10829	0.300962	10829	0.144726	10829	8.16401	10829	0.000899065
10830	0.403795	10830	8.46174	10830	0.121649	10830	0.109206	10830	6.68014	10830	0.000564742
10831	0.453512	10831	11.3797	10831	0.141017	10831	0.107711	10831	7.97688	10831	0.00042026
10832	0.553138	10832	15.8388	10832	0.219618	10832	0.142762	10832	4.87289	10832	0.000374527
10833	0.707375	10833	22.4514	10833	0.302882	10833	0.245099	10833	4.28804	10833	0.000395176
10834	0.914096	10834	31.6733	10834	0.323349	10834	0.494593	10834	5.58175	10834	0.000476585
10835	1.15494	10835	43.1791	10835	0.252276	10835	1.03173	10835	4.84605	10835	0.000622059
10836	1.39286	10836	55.2405	10836	0.143432	10836	1.96796	10836	7.58204	10836	0.000826157
10837	1.58245	10837	64.9507	10837	0.0635773	10837	3.13644	10837	7.72444	10837	0.0010575
10838	1.6874	10838	69.668	10838	0.0273823	10838	3.98194	10838	3.79222	10838	0.00125706
10839	1.69173	10839	68.5595	10839	0.0175401	10839	3.98974	10839	5.2803	10839	0.00136178
10840	1.60086	10840	62.8043	10840	0.0211396	10840	3.21243	10840	5.28415	10840	0.00133692
10841	1.43835	10841	54.5651	10841	0.0317908	10841	2.15103	10841	6.31247	10841	0.00119152
10842	1.24093	10842	45.8957	10842	0.0380483	10842	1.25193	10842	11.7173	10842	0.000970422
10843	1.04892	10843	38.2258	10843	0.0314919	10843	0.668629	10843	13.125	10843	0.000732048
10844	0.893689	10844	32.3171	10844	0.0190321	10844	0.350519	10844	9.56025	10844	0.00052409
10845	0.790881	10845	28.4328	10845	0.0100507	10845	0.195384	10845	11.3186	10845	0.000369613
10846	0.742303	10846	26.5659	10846	0.00519662	10846	0.125771	10846	14.8369	10846	0.000269228
10847	0.740853	10847	26.6256	10847	0.002526	10847	0.099839	10847	12.9941	10847	0.000212687
10848	0.772363	10848	28.4988	10848	0.00116038	10848	0.100473	10848	13.9075	10848	0.000189384
10849	0.814392	10849	31.9285	10849	0.000508317	10849	0.125443	10849	13.9369	10849	0.000193435
10850	0.837912	10850	36.2235	10850	0.000202604	10850	0.181962	10850	30.4409	10850	0.000224695
10851	0.817409	10851	40.0333	10851	7.69214e-05	10851	0.279879	10851	56.2796	10851	0.00028736
10852	0.745118	10852	41.7028	10852	3.95923e-05	10852	0.415428	10852	78.5152	10852	0.000385436
10853	0.635939	10853	40.3855	10853	4.99737e-05	10853	0.550672	10853	81.5745	10853	0.000513276
10854	0.516923	10854	36.9327	10854	7.56215e-05	10854	0.62134	10854	65.664	10854	0.000644042
10855	0.411578	10855	33.4214	10855	7.71587e-05	10855	0.589209	10855	40.4277	10855	0.000729253
10856	0.33197	10856	31.9681	10856	5.30746e-05	10856	0.479869	10856	17.1842	10856	0.000723248
10857	0.280441	10857	34.3334	10857	3.28088e-05	10857	0.352568	10857	7.1028	10857	0.000619834
10858	0.255112	10858	42.5179	10858	2.94826e-05	10858	0.249231	10858	2.98957	10858	0.000461392
10859	0.254477	10859	59.3247	10859	3.77411e-05	10859	0.180785	10859	1.16859	10859	0.000305958
10860	0.280153	10860	87.3042	10860	4.49545e-05	10860	0.141558	10860	0.93883	10860	0.000189028
10861	0.338547	10861	124.561	10861	4.13949e-05	10861	0.123232	10861	0.831261	10861	0.00011547
10862	0.441934	10862	159.808	10862	3.02682e-05	10862	0.120292	10862	0.567055	10862	7.43085e-05
10863	0.607991	10863	175.577	10863	1.90763e-05	10863	0.130691	10863	0.566629	10863	5.31119e-05
10864	0.854958	10864	162.258	10864	1.19882e-05	10864	0.155178	10864	0.514602	10864	4.34145e-05
10865	1.18934	10865	127.189	10865	1.08643e-05	10865	0.196179	10865	0.574574	10865	4.06277e-05
10866	1.58925	10866	86.806	10866	1.44851e-05	10866	0.255702	10866	1.20218	10866	4.26538e-05
10867	1.9987	10867	53.4512	10867	2.09636e-05	10867	0.331726	10867	1.88621	10867	4.88824e-05
10868	2.34942	10868	30.8709	10868	3.40919e-05	10868	0.414387	10868	4.5961	10868	5.98441e-05
10869	2.60035	10869	17.3794	10869	6.16907e-05	10869	0.48609	10869	5.34824	10869	7.74201e-05
10870	2.75945	10870	9.88601	10870	0.000103903	10870	0.528836	10870	10.1319	10870	0.000105438
10871	2.86844	10871	5.86351	10871	0.000152869	10871	0.53474	10871	11.153	10871	0.000150339
10872	2.96781	10872	3.71433	10872	0.000211005	10872	0.510308	10872	11.9217	10872	0.000220979
10873	3.06748	10873	2.54654	10873	0.000307674	10873	0.471002	10873	9.83221	10873	0.000325206
10874	3.13432	10874	1.8908	10874	0.00048849	10874	0.432478	10874	14.2433	10874	0.000460465
10875	3.10301	10875	1.50567	10875	0.000793678	10875	0.405888	10875	13.5587	10875	0.000602025
10876	2.91564	10876	1.26924	10876	0.00127814	10876	0.398651	10876	8.26259	10876	0.000705679
10877	2.57207	10877	1.12513	10877	0.0018311	10877	0.418435	10877	6.09922	10877	0.000737199
10878	2.14403	10878	1.05627	10878	0.00196038	10878	0.478986	10878	11.218	10878	0.000702766
10879	1.73193	10879	1.07231	10879	0.00146921	10879	0.609116	10879	8.55709	10879	0.000642466
10880	1.40791	10880	1.20671	10880	0.000938386	10880	0.868605	10880	3.76497	10880	0.000598977
10881	1.19535	10881	1.52286	10881	0.000847434	10881	1.37341	10881	6.79706	10881	0.000599854
10882	1.08233	10882	2.11722	10882	0.00112618	10882	2.3128	10882	10.5034	10882	0.00065948
10883	1.03854	10883	3.07784	10883	0.00157944	10883	3.8778	10883	11.6584	10883	0.000780757
10884	1.02151	10884	4.3333	10884	0.00196763	10884	5.97009	10884	16.7787	10884	0.000940696
10885	0.981075	10885	5.44881	10885	0.00200881	10885	7.82572	10885	15.9217	10885	0.00106739
10886	0.878225	10886	5.7364	10886	0.00161524	10886	8.28753	10886	12.7814	10886	0.00105668
10887	0.712273	10887	4.8915	10887	0.000982648	10887	6.972	10887	10.1614	10887	0.000864752
10888	0.523242	10888	3.39773	10888	0.000480642	10888	4.78322	10888	9.96359	10888	0.000576083
10889	0.358508	10889	2.00984	10889	0.000407655	10889	2.87549	10889	23.5892	10889	0.000322091
10890	0.241199	10890	1.09137	10890	0.000959652	10890	1.69312	10890	9.81171	10890	0.000162459
10891	0.168893	10891	0.59488	10891	0.0025793	10891	1.11132	10891	3.01347	10891	8.14014e-05
10892	0.128854	10892	0.352837	10892	0.0067002	10892	0.905921	10892	1.03479	10892	4.44474e-05
10893	0.109068	10893	0.23942	10893	0.015556	10893	0.957509	10893	1.75465	10893	2.81325e-05
10894	0.101123	10894	0.187687	10894	0.027063	10894	1.258	10894	1.90404	10894	2.1037e-05
10895	0.099397	10895	0.166248	10895	0.0328338	10895	1.84516	10895	1.33718	10895	1.8293e-05
10896	0.100158	10896	0.160867	10896	0.0285682	10896	2.6636	10896	2.1333	10896	1.79171e-05
10897	0.101536	10897	0.165647	10897	0.0188959	10897	3.42229	10897	1.86011	10897	1.91698e-05
10898	0.103569	10898	0.179522	10898	0.00955251	10898	3.71417	10898	1.24989	10898	2.19322e-05
10899	0.10741	10899	0.204578	10899	0.00345058	10899	3.39254	10899	1.4311	10899	2.64482e-05
10900	0.113877	10900	0.244591	10900	0.000991752	10900	2.69001	10900	1.16557	10900	3.30397e-05
10901	0.12203	10901	0.303086	10901	0.000547786	10901	1.93883	10901	1.03797	10901	4.14489e-05
10902	0.128447	10902	0.380765	10902	0.000563906	10902	1.32738	10902	2.44079	10902	4.97374e-05
10903	0.128295	10903	0.473848	10903	0.000486916	10903	0.892469	10903	2.74792	10903	5.38418e-05
10904	0.118696	10904	0.576989	10904	0.000311268	10904	0.604024	10904	5.31172	10904	4.99648e-05
10905	0.101624	10905	0.692455	10905	0.000159806	10905	0.422253	10905	21.6959	10905	3.88042e-05
10906	0.0826299	10906	0.841512	10906	6.90872e-05	10906	0.316215	10906	27.2901	10906	2.56342e-05
10907	0.0668027	10907	1.07437	10907	2.50141e-05	10907	0.26593	10907	12.3979	10907	1.52654e-05
10908	0.0565149	10908	1.48321	10908	8.01472e-06	10908	0.262212	10908	19.9867	10908	8.94213e-06
10909	0.0520584	10909	2.22249	10909	2.68816e-06	10909	0.307607	10909	35.5732	10909	5.64842e-06
10910	0.0531449	10910	3.51576	10910	2.43989e-06	10910	0.415832	10910	29.2918	10910	4.12358e-06
10911	0.0598917	10911	5.58639	10911	7.53042e-06	10911	0.600994	10911	44.0596	10911	3.58785e-06
10912	0.0733198	10912	8.47042	10912	2.61666e-05	10912	0.847069	10912	79.3891	10912	3.70407e-06
10913	0.0958103	10913	11.8605	10913	7.37873e-05	10913	1.07964	10913	60.9557	10913	4.43551e-06
10914	0.131687	10914	15.2613	10914	0.000150884	10914	1.20125	10914	86.6929	10914	6.00081e-06
10915	0.187407	10915	18.3713	10915	0.000231539	10915	1.17857	10915	128.274	10915	8.91932e-06
10916	0.269835	10916	21.2168	10916	0.000288607	10916	1.06359	10916	45.7799	10916	1.40334e-05
10917	0.380675	10917	23.8887	10917	0.00032997	10917	0.92893	10917	29.5452	10917	2.2228e-05
10918	0.508671	10918	26.2162	10918	0.000471832	10918	0.816209	10918	16.0626	10918	3.3589e-05
10919	0.628901	10919	27.7414	10919	0.000924445	10919	0.736351	10919	7.82503	10919	4.6655e-05
10920	0.717174	10920	28.0945	10920	0.00165113	10920	0.689616	10920	4.78343	10920	5.94192e-05
10921	0.767431	10921	27.437	10921	0.00221825	10921	0.679527	10921	3.78312	10921	7.18375e-05
10922	0.791046	10922	26.4669	10922	0.00231643	10922	0.71599	10922	2.88344	10922	8.68852e-05
10923	0.799826	10923	25.9856	10923	0.00201614	10923	0.810613	10923	2.54209	10923	0.000109016
10924	0.792463	10924	26.4973	10924	0.00150619	10924	0.964146	10924	2.29347	10924	0.000140893
10925	0.7573	10925	28.0651	10925	0.00101947	10925	1.14437	10925	2.27842	10925	0.000178229
10926	0.689851	10926	30.3211	10926	0.000693487	10926	1.27371	10926	2.38943	10926	0.000206333
10927	0.607176	10927	32.5725	10927	0.000456741	10927	1.26934	10927	1.85099	10927	0.000208811
10928	0.540858	10928	34.0324	10928	0.000253254	10928	1.11947	10928	0.723213	10928	0.000184858
10929	0.519669	10929	34.0686	10929	0.000116819	10929	0.893761	10929	0.450094	10929	0.000150148
10930	0.564637	10930	32.3212	10930	5.27958e-05	10930	0.672103	10930	0.187387	10930	0.000120032
10931	0.693072	10931	28.7566	10931	3.52044e-05	10931	0.492548	10931	0.106047	10931	9.99117e-05
10932	0.908068	10932	23.7813	10932	4.88237e-05	10932	0.357377	10932	0.10258	10932	8.79328e-05
10933	1.15939	10933	18.2494	10933	9.57303e-05	10933	0.257398	10933	0.15057	10933	7.97125e-05
10934	1.31567	10934	13.1308	10934	0.000213461	10934	0.184991	10934	0.0779532	10934	7.11216e-05
10935	1.24061	10935	9.04528	10935	0.000549961	10935	0.135226	10935	0.0509164	10935	6.00563e-05
10936	0.941233	10936	6.09917	10936	0.00140467	10936	0.103482	10936	0.0518132	10936	4.70106e-05
10937	0.575618	10937	4.07499	10937	0.00303465	10937	0.0846962	10937	0.111513	10937	3.39428e-05
10938	0.292546	10938	2.69013	10938	0.00574337	10938	0.0739222	10938	0.119719	10938	2.26719e-05
10939	0.130441	10939	1.73514	10939	0.0107623	10939	0.0667691	10939	0.0990676	10939	1.41367e-05
10940	0.0549591	10940	1.08871	10940	0.0192612	10940	0.0598465	10940	0.121212	10940	8.42445e-06
10941	0.0239424	10941	0.675879	10941	0.0280666	10941	0.0516236	10941	0.148845	10941	5.04883e-06
10942	0.0118879	10942	0.433051	10942	0.030627	10942	0.0428046	10942	0.0679956	10942	3.30784e-06
10943	0.00736008	10943	0.303188	10943	0.0253412	10943	0.035275	10943	0.0630882	10943	2.62299e-06
10944	0.00604391	10944	0.244335	10944	0.0173914	10944	0.0306599	10944	0.0376301	10944	2.74051e-06
10945	0.00667683	10945	0.233212	10945	0.0116653	10945	0.0300537	10945	0.0337485	10945	3.87946e-06
10946	0.00951952	10946	0.263077	10946	0.00838643	10946	0.0350129	10946	0.0506115	10946	7.08819e-06
10947	0.0160519	10947	0.341365	10947	0.00563395	10947	0.0494197	10947	0.0780987	10947	1.49785e-05
10948	0.0287186	10948	0.489517	10948	0.00304536	10948	0.0826203	10948	0.0431916	10948	3.2067e-05
10949	0.0492552	10949	0.743546	10949	0.00137005	10949	0.154101	10949	0.080149	10949	6.18888e-05
10950	0.075261	10950	1.15042	10950	0.000604556	10950	0.295512	10950	0.310641	10950	9.96084e-05
10951	0.09878	10951	1.75217	10951	0.000269793	10951	0.535291	10951	0.507559	10951	0.000129299
10952	0.110958	10952	2.55028	10952	0.000116446	10952	0.851367	10952	0.393948	10952	0.000135788
10953	0.108429	10953	3.45553	10953	5.799e-05	10953	1.12597	10953	0.736048	10953	0.0001181
10954	0.0941215	10954	4.25745	10954	4.49099e-05	10954	1.19598	10954	0.997337	10954	8.72853e-05
10955	0.0736374	10955	4.67449	10955	5.13041e-05	10955	1.00466	10955	0.827994	10955	5.57559e-05
10956	0.0523008	10956	4.5103	10956	6.16903e-05	10956	0.671814	10956	1.86502	10956	3.10969e-05
10957	0.034017	10957	3.81399	10957	6.33453e-05	10957	0.370249	10957	1.49256	10957	1.54242e-05
10958	0.0207217	10958	2.86638	10958	5.59862e-05	10958	0.180322	10958	0.569825	10958	7.12683e-06
10959	0.0123437	10959	1.98075	10959	5.50803e-05	10959	0.0862933	10959	0.322914	10959	3.34531e-06
10960	0.00762823	10960	1.32581	10960	8.89768e-05	10960	0.0462723	10960	0.416263	10960	1.79812e-06
10961	0.00518747	10961	0.913463	10961	0.000185988	10961	0.0316343	10961	0.204118	10961	1.24769e-06
10962	0.00403959	10962	0.683144	10962	0.000362841	10962	0.0300882	10962	0.305488	10962	1.19854e-06
10963	0.00363832	10963	0.569562	10963	0.000760595	10963	0.0402386	10963	0.648277	10963	1.56348e-06
10964	0.00372504	10964	0.5235	10964	0.00212441	10964	0.0702284	10964	0.55831	10964	2.48718e-06
10965	0.00419323	10965	0.506924	10965	0.00585955	10965	0.139754	10965	1.09643	10965	4.13155e-06
10966	0.00499535	10966	0.486737	10966	0.0109771	10966	0.272278	10966	2.19654	10966	6.16422e-06
10967	0.00606893	10967	0.440513	10967	0.0126376	10967	0.455879	10967	2.70958	10967	7.41408e-06
10968	0.00726552	10968	0.368201	10968	0.00896795	10968	0.602596	10968	2.12503	10968	6.85089e-06
10969	0.00830322	10969	0.289369	10969	0.00413729	10969	0.608523	10969	3.06882	10969	4.92645e-06
10970	0.00880834	10970	0.224667	10970	0.00153106	10970	0.475613	10970	0.632766	10970	2.93704e-06
10971	0.0084939	10971	0.183352	10971	0.000803617	10971	0.30098	10971	0.498444	10971	1.59513e-06
10972	0.00737887	10972	0.165465	10972	0.000991865	10972	0.16387	10972	0.234957	10972	8.72038e-07
10973	0.00582187	10973	0.168606	10973	0.00236373	10973	0.0817268	10973	0.0671168	10973	5.20242e-07
10974	0.00429121	10974	0.191342	10974	0.00592786	10974	0.0395863	10974	0.015292	10974	3.54921e-07
10975	0.00309769	10975	0.232691	10975	0.0121941	10975	0.0197047	10975	0.00402424	10975	2.80674e-07
10976	0.00232441	10976	0.289904	10976	0.0200519	10976	0.0107042	10976	0.00115853	10976	2.55804e-07
10977	0.00192602	10977	0.357831	10977	0.0243627	10977	0.00677034	10977	0.00047385	10977	2.66691e-07
10978	0.00184917	10978	0.432312	10978	0.02034	10978	0.0052938	10978	0.00032861	10978	3.18946e-07
10979	0.00211165	10979	0.515372	10979	0.0119875	10979	0.00531444	10979	0.000239855	10979	4.44373e-07
10980	0.00287591	10980	0.616602	10980	0.00619333	10980	0.00685948	10980	0.000325825	10980	7.38435e-07
10981	0.00460555	10981	0.747979	10981	0.00432822	10981	0.0109796	10981	0.000798726	10981	1.49919e-06
10982	0.00847968	10982	0.912279	10982	0.0048148	10982	0.0204993	10982	0.00362259	10982	3.77608e-06
10983	0.0174512	10983	1.08621	10983	0.00657081	10983	0.0416002	10983	0.01382	10983	1.1728e-05
10984	0.0385499	10984	1.20901	10984	0.00994447	10984	0.0854964	10984	0.0239019	10984	4.30614e-05
10985	0.0858229	10985	1.20311	10985	0.016005	10985	0.165828	10985	0.0986072	10985	0.000171418
10986	0.176289	10986	1.03602	10986	0.0237234	10986	0.282209	10986	0.178225	10986	0.000654127
10987	0.301772	10987	0.764522	10987	0.031191	10987	0.391863	10987	0.271357	10987	0.00208941
10988	0.39274	10988	0.493473	10988	0.0432056	10988	0.417551	10988	0.201101	10988	0.00496592
10989	0.367706	10989	0.293672	10989	0.07227	10989	0.330502	10989	0.223251	10989	0.00814505
10990	0.248231	10990	0.174299	10990	0.121395	10990	0.197196	10990	0.107299	10990	0.00904076
10991	0.129545	10991	0.112575	10991	0.164785	10991	0.0955254	10991	0.0531749	10991	0.00704738
10992	0.0595013	10992	0.0848452	10992	0.172036	10992	0.0428456	10992	0.0409706	10992	0.00419023
10993	0.0282019	10993	0.0766506	10993	0.149629	10993	0.0209217	10993	0.0264387	10993	0.00211255
10994	0.0158182	10994	0.0808182	10994	0.12256	10994	0.0128046	10994	0.0174805	10994	0.000998562
10995	0.0112027	10995	0.0928997	10995	0.0980331	10995	0.0104794	10995	0.0173604	10995	0.000475813
10996	0.00979845	10996	0.107413	10996	0.0720642	10996	0.0111049	10996	0.0495461	10996	0.000238459
10997	0.00979558	10997	0.117449	10997	0.0460754	10997	0.0137999	10997	0.0545343	10997	0.000130144
10998	0.0103343	10998	0.118794	10998	0.0253629	10998	0.0180211	10998	0.125852	10998	8.21554e-05
10999	0.0110204	10999	0.113607	10999	0.012065	10999	0.0229072	10999	0.169512	10999	6.64747e-05
11000	0.0119145	11000	0.108333	11000	0.00523382	11000	0.0275127	11000	0.10994	11000	7.78933e-05
11001	0.0134924	11001	0.109191	11001	0.00294505	11001	0.0314134	11001	0.389933	11001	0.000143034
11002	0.0165511	11002	0.120357	11002	0.00301191	11002	0.0347869	11002	0.109647	11002	0.000401222
11003	0.0221855	11003	0.143841	11003	0.00361031	11003	0.0379001	11003	0.0751471	11003	0.00149786
11004	0.0316224	11004	0.177475	11004	0.00340413	11004	0.0405903	11004	0.118928	11004	0.00609675
11005	0.0452847	11005	0.210908	11005	0.00227913	11005	0.0421361	11005	0.0923295	11005	0.0222434
11006	0.0607995	11006	0.22624	11006	0.00121072	11006	0.0415956	11006	0.0982785	11006	0.0625435
11007	0.0718557	11007	0.210109	11007	0.000703932	11007	0.0384395	11007	0.102795	11007	0.123372
11008	0.0716313	11008	0.167199	11008	0.000512612	11008	0.0330347	11008	0.0797352	11008	0.163861
11009	0.0594283	11009	0.116365	11009	0.000385894	11009	0.0265611	11009	0.0798913	11009	0.147058
11010	0.041849	11010	0.0740701	11010	0.00025173	11010	0.0204035	11010	0.155073	11010	0.0929454
11011	0.0263161	11011	0.0457301	11011	0.000127191	11011	0.0155089	11011	0.282837	11011	0.0445817
11012	0.0158755	11012	0.029093	11012	4.9804e-05	11012	0.0121655	11012	0.206381	11012	0.0179951
11013	0.00989657	11013	0.0200749	11013	2.10154e-05	11013	0.0101944	11013	0.250953	11013	0.00690922
11014	0.0067477	11014	0.0155648	11014	1.99903e-05	11014	0.0092309	11014	0.744685	11014	0.00285757
11015	0.00517491	11015	0.013818	11015	4.19099e-05	11015	0.00887525	11015	0.880882	11015	0.00141073
11016	0.0044832	11016	0.0141215	11016	8.66722e-05	11016	0.00874025	11016	1.21837	11016	0.000882117
11017	0.00437332	11017	0.0165092	11017	0.000123768	11017	0.00852757	11017	1.01012	11017	0.000703083
11018	0.00481356	11018	0.0216405	11018	0.000116146	11018	0.00814138	11018	0.803697	11018	0.000686137
11019	0.00601003	11019	0.0306398	11019	7.60798e-05	11019	0.00769612	11019	0.565199	11019	0.00076472
11020	0.00846095	11020	0.0444368	11020	4.11811e-05	11020	0.00737538	11020	0.344294	11020	0.000899811
11021	0.0130165	11021	0.0623001	11021	2.29562e-05	11021	0.00728904	11021	0.434207	11021	0.00104344
11022	0.0206724	11022	0.0807146	11022	1.35232e-05	11022	0.00743378	11022	0.594247	11022	0.00114059
11023	0.0316634	11023	0.0951501	11023	9.25626e-06	11023	0.00774033	11023	0.65853	11023	0.00116082
11024	0.0440757	11024	0.10426	11024	1.71288e-05	11024	0.0081653	11024	0.363876	11024	0.00111952
11025	0.0537785	11025	0.111676	11025	8.19951e-05	11025	0.00877313	11025	0.43066	11025	0.00105929
11026	0.0570415	11026	0.123843	11026	0.000474671	11026	0.0097405	11026	0.474063	11026	0.00101552
11027	0.0534159	11027	0.147465	11027	0.00253333	11027	0.0112605	11027	0.553926	11027	0.000998778
11028	0.0455269	11028	0.18779	11028	0.010586	11028	0.0133555	11028	0.631311	11028	0.00099495
11029	0.0366515	11029	0.244813	11029	0.0332771	11029	0.0156417	11029	0.641859	11029	0.000975026
11030	0.0290061	11030	0.306929	11030	0.0743971	11030	0.0173227	11030	1.58139	11030	0.000913959
11031	0.0235717	11031	0.351316	11031	0.109917	11031	0.0177929	11031	2.04525	11031	0.000810956
11032	0.0206237	11032	0.360396	11032	0.108042	11032	0.0174359	11032	0.813406	11032	0.000691293
11033	0.020283	11033	0.338785	11033	0.0814309	11033	0.017626	11033	0.271299	11033	0.000586332
11034	0.0228889	11034	0.307136	11034	0.0653234	11034	0.020306	11034	0.227238	11034	0.000514162
11035	0.0290204	11035	0.283159	11035	0.0729298	11035	0.0285711	11035	0.244048	11035	0.000475304
11036	0.0386672	11036	0.272218	11036	0.112317	11036	0.0488203	11036	0.460789	11036	0.000456459
11037	0.0492868	11037	0.268061	11037	0.195608	11037	0.0931738	11037	0.780722	11037	0.000435099
11038	0.0550683	11038	0.257134	11038	0.29241	11038	0.176042	11038	4.40006	11038	0.000389742
11039	0.051406	11039	0.228016	11039	0.341425	11039	0.296903	11039	5.91029	11039	0.000316971
11040	0.0405431	11040	0.182846	11040	0.340193	11040	0.424702	11040	8.76958	11040	0.000235917
11041	0.0289935	11041	0.136027	11041	0.33427	11041	0.518827	11041	11.0055	11041	0.000169645
11042	0.0209572	11042	0.100329	11042	0.370132	11042	0.566876	11042	5.28225	11042	0.00012801
11043	0.017036	11043	0.0793175	11043	0.538616	11043	0.584996	11043	5.40568	11043	0.000109558
11044	0.0165797	11044	0.0708016	11044	0.91758	11044	0.590352	11044	12.1577	11044	0.000110912
11045	0.0192686	11045	0.0715123	11045	1.31462	11045	0.584511	11045	14.7078	11045	0.000132366
11046	0.0252893	11046	0.0782216	11046	1.34271	11046	0.556394	11046	34.3365	11046	0.000179857
11047	0.0346738	11047	0.0867904	11047	0.979518	11047	0.496319	11047	28.2939	11047	0.000265956
11048	0.0461686	11048	0.0918216	11048	0.588082	11048	0.408535	11048	9.94379	11048	0.000409024
11049	0.0563887	11049	0.0884588	11049	0.386368	11049	0.310415	11049	13.3448	11049	0.000623588
11050	0.0605762	11050	0.0753534	11050	0.33911	11050	0.220705	11050	13.8715	11050	0.000892135
11051	0.055578	11051	0.0559778	11051	0.33156	11051	0.150165	11051	7.40116	11051	0.00113144
11052	0.0429217	11052	0.0364518	11052	0.267823	11052	0.100648	11052	3.94841	11052	0.0012164
11053	0.0280965	11053	0.0214572	11053	0.153819	11053	0.0687971	11053	1.60679	11053	0.00108973
11054	0.0161346	11054	0.0121063	11054	0.062575	11054	0.0497395	11054	0.602536	11054	0.000828118
11055	0.00864078	11055	0.00707089	11055	0.0227283	11055	0.0391892	11055	0.411993	11055	0.000560176
11056	0.00466475	11056	0.00460824	11056	0.0134041	11056	0.0341239	11056	0.277195	11056	0.000359681
11057	0.00274056	11057	0.00352899	11057	0.0164516	11057	0.0326705	11057	0.165025	11057	0.000233501
11058	0.00185355	11058	0.00323725	11058	0.0271654	11058	0.0337429	11058	0.230948	11058	0.00016112
11059	0.0014781	11059	0.00353385	11059	0.0467797	11059	0.0367305	11059	0.170562	11059	0.000122257
11060	0.0013776	11060	0.00450267	11060	0.0772291	11060	0.0412927	11060	0.112289	11060	0.000104254
11061	0.00145259	11061	0.00653281	11061	0.10894	11061	0.0471612	11061	0.123827	11061	0.000101196
11062	0.0016578	11062	0.0104515	11062	0.12065	11062	0.0538303	11062	0.151043	11062	0.000112131
11063	0.00195665	11063	0.0176317	11063	0.105531	11063	0.0601896	11063	0.111754	11063	0.000140494
11064	0.00229862	11064	0.0296137	11064	0.0803645	11064	0.0644655	11064	0.121471	11064	0.00019542
11065	0.00262484	11065	0.046499	11065	0.0608531	11065	0.0649492	11065	0.0949771	11065	0.000297455
11066	0.00290274	11066	0.0644774	11066	0.0446485	11066	0.0613025	11066	0.127468	11066	0.000498918
11067	0.00316061	11067	0.0757959	11067	0.0262858	11067	0.0552001	11067	0.0529784	11067	0.000956872
11068	0.00348733	11068	0.0740942	11068	0.0114215	11068	0.0495154	11068	0.030186	11068	0.00221772
11069	0.00399683	11069	0.0603843	11069	0.00563511	11069	0.0471078	11069	0.0448278	11069	0.00647938
11070	0.00477126	11070	0.0418983	11070	0.00649513	11070	0.0508179	11070	0.040143	11070	0.0237869
11071	0.00576716	11071	0.0256304	11071	0.00876244	11071	0.0653018	11071	0.0456564	11071	0.103185
11072	0.00669483	11072	0.0144515	11072	0.00916291	11072	0.101225	11072	0.0708941	11072	0.474153
11073	0.00703598	11073	0.00789834	11073	0.00799981	11073	0.183224	11073	0.228238	11073	2.02092
11074	0.00639959	11074	0.00440719	11074	0.00670323	11074	0.359335	11074	0.355136	11074	7.02047
11075	0.00494779	11075	0.00263163	11075	0.00565433	11075	0.687163	11075	0.172292	11075	17.9226
11076	0.00329053	11076	0.00173921	11076	0.00435147	11076	1.14133	11076	0.284905	11076	31.5051
11077	0.00195124	11077	0.00128754	11077	0.00263099	11077	1.48996	11077	0.288989	11077	37.2743
11078	0.00108371	11078	0.00105341	11078	0.00125356	11078	1.44085	11078	0.183053	11078	30.2204
11079	0.000593316	11079	0.00091957	11079	0.000654205	11079	1.02931	11079	0.393423	11079	17.7455
11080	0.000334732	11080	0.000818602	11080	0.000592705	11080	0.574624	11080	0.381266	11080	8.24622
11081	0.000201251	11081	0.00071433	11081	0.000755277	11081	0.277978	11081	0.449174	11081	3.40462
11082	0.000132116	11082	0.000599432	11082	0.00101038	11082	0.132267	11082	0.877627	11082	1.42388
11083	9.67377e-05	11083	0.000488499	11083	0.0017563	11083	0.0700189	11083	0.362675	11083	0.684111
11084	8.10766e-05	11084	0.000401767	11084	0.00423285	11084	0.0456093	11084	0.286882	11084	0.41403
11085	8.03193e-05	11085	0.000352989	11085	0.0106113	11085	0.0392454	11085	0.149958	11085	0.325772
11086	9.66862e-05	11086	0.000350675	11086	0.0228427	11086	0.0463283	11086	0.215633	11086	0.320749
11087	0.000141666	11087	0.000408261	11087	0.0386829	11087	0.0748685	11087	0.192841	11087	0.3612
11088	0.000242237	11088	0.000556555	11088	0.0500945	11088	0.157698	11088	0.399305	11088	0.419169
11089	0.00044412	11089	0.000852873	11089	0.0507935	11089	0.392991	11089	0.632999	11089	0.461021
11090	0.000785833	11090	0.00136707	11090	0.0431333	11090	1.01355	11090	2.45497	11090	0.458889
11091	0.00121857	11091	0.0020995	11091	0.0326152	11091	2.33588	11091	8.05845	11091	0.40919
11092	0.00155052	11092	0.0028306	11092	0.0219566	11092	4.22666	11092	12.8131	11092	0.331084
11093	0.00157591	11093	0.00311402	11093	0.0130325	11093	5.50362	11093	21.7405	11093	0.248157
11094	0.00129204	11094	0.00266998	11094	0.00702251	11094	4.99489	11094	72.0322	11094	0.175538
11095	0.000889243	11095	0.00177304	11095	0.00346142	11095	3.23808	11095	51.584	11095	0.119011
11096	0.000547056	11096	0.00095271	11096	0.00158977	11096	1.61464	11096	12.4587	11096	0.0787429
11097	0.000325241	11097	0.000456368	11097	0.000734675	11097	0.691937	11097	5.24389	11097	0.0522354
11098	0.000202929	11098	0.000223745	11098	0.000327992	11098	0.29072	11098	1.73747	11098	0.0360062
11099	0.000142703	11099	0.000130094	11099	0.000141745	11099	0.137036	11099	0.455142	11099	0.0267162
11100	0.000118238	11100	0.000100284	11100	0.000149918	11100	0.0816595	11100	0.321577	11100	0.0217781
11101	0.000116543	11101	0.000106598	11101	0.000451419	11101	0.0669532	11101	0.277503	11101	0.0193996
11102	0.000133998	11102	0.000150308	11102	0.00147665	11102	0.0779232	11102	0.343075	11102	0.0182943
11103	0.000173678	11103	0.000256295	11103	0.00463455	11103	0.124587	11103	0.493505	11103	0.0173863
11104	0.000245093	11104	0.000472008	11104	0.0127322	11104	0.249899	11104	1.11088	11104	0.0157703
11105	0.000365763	11105	0.00084216	11105	0.0269355	11105	0.55343	11105	3.00651	11105	0.0129988
11106	0.000563265	11106	0.00133026	11106	0.0407581	11106	1.18075	11106	12.1695	11106	0.00939536
11107	0.000874498	11107	0.00175075	11107	0.0443048	11107	2.15857	11107	24.0673	11107	0.00586719
11108	0.00133692	11108	0.00188226	11108	0.0390489	11108	3.13024	11108	61.812	11108	0.00320889
11109	0.00196863	11109	0.00170538	11109	0.0363819	11109	3.50606	11109	72.2418	11109	0.00161144
11110	0.00274579	11110	0.00141493	11110	0.0397212	11110	3.10593	11110	87.02	11110	0.000803579
11111	0.00360008	11111	0.00121065	11111	0.0407328	11111	2.32108	11111	129.051	11111	0.000436921
11112	0.00445116	11112	0.00120189	11112	0.0344034	11112	1.59774	11112	71.6719	11112	0.000280675
11113	0.00525255	11113	0.00148744	11113	0.0262231	11113	1.10806	11113	160.721	11113	0.000221332
11114	0.00600812	11114	0.00229007	11114	0.0206401	11114	0.830946	11114	87.2946	11114	0.000211059
11115	0.00674611	11115	0.0041	11115	0.0159928	11115	0.701041	11115	204.627	11115	0.000230682
11116	0.00748278	11116	0.00775025	11116	0.0124301	11116	0.671215	11116	144.753	11116	0.000271695
11117	0.00821844	11117	0.0141757	11117	0.0113935	11117	0.72014	11117	162.198	11117	0.000330499
11118	0.00898168	11118	0.0237046	11118	0.0102285	11118	0.845769	11118	146.251	11118	0.000410398
11119	0.0098942	11119	0.0353681	11119	0.00677037	11119	1.05713	11119	100.666	11119	0.000527345
11120	0.0112085	11120	0.0469946	11120	0.00324104	11120	1.3623	11120	114.982	11120	0.000717275
11121	0.0132957	11121	0.0560208	11121	0.0014364	11121	1.74819	11121	75.4202	11121	0.00104718
11122	0.016569	11122	0.0603016	11122	0.000865396	11122	2.1562	11122	144.56	11122	0.00163071
11123	0.0212472	11123	0.0586688	11123	0.00113868	11123	2.47452	11123	100.337	11123	0.00263429
11124	0.0268354	11124	0.0514242	11124	0.00280969	11124	2.57248	11124	199.215	11124	0.00423151
11125	0.0315764	11125	0.0405416	11125	0.00798924	11125	2.37361	11125	164.64	11125	0.00645668
11126	0.0328922	11126	0.0289811	11126	0.0212448	11126	1.91761	11126	246.271	11126	0.00900955
11127	0.0293899	11127	0.0192543	11127	0.0496817	11127	1.35071	11127	196.389	11127	0.0112566
11128	0.0224657	11128	0.0124117	11128	0.104162	11128	0.838569	11128	141.911	11128	0.0126152
11129	0.0151168	11129	0.00819928	11129	0.175136	11129	0.47439	11129	44.1922	11129	0.0130173
11130	0.00945693	11130	0.00584242	11130	0.199199	11130	0.259613	11130	69.1635	11130	0.012941
11131	0.00588905	11131	0.00462452	11131	0.139943	11131	0.149102	11131	21.3665	11131	0.0130511
11132	0.00389089	11132	0.0040496	11132	0.0609484	11132	0.0978461	11132	24.2836	11132	0.0139001
11133	0.0028406	11133	0.00378554	11133	0.0209507	11133	0.0779544	11133	11.7051	11133	0.0158633
11134	0.00230546	11134	0.00358569	11134	0.0121086	11134	0.0762848	11134	9.52198	11134	0.0191654
11135	0.00202447	11135	0.00327993	11135	0.0141748	11135	0.0878683	11135	6.51718	11135	0.0239465
11136	0.00183544	11136	0.00281975	11136	0.0155023	11136	0.110123	11136	7.97291	11136	0.0306125
11137	0.00163859	11137	0.00228163	11137	0.0112664	11137	0.137924	11137	6.35471	11137	0.0408248
11138	0.00139738	11138	0.00178554	11138	0.00542545	11138	0.161358	11138	4.99381	11138	0.0595978
11139	0.00113602	11139	0.00140799	11139	0.00203677	11139	0.169387	11139	6.12432	11139	0.100383
11140	0.000906408	11140	0.00116325	11140	0.000756177	11140	0.157198	11140	5.68592	11140	0.199093
11141	0.000748265	11141	0.0010314	11141	0.00048097	11141	0.129435	11141	3.51922	11141	0.447211
11142	0.000677252	11142	0.000986228	11142	0.000573782	11142	0.0961274	11142	4.8757	11142	1.03161
11143	0.000697261	11143	0.00100721	11143	0.000661978	11143	0.0661145	11143	5.49699	11143	2.14466
11144	0.000810263	11144	0.00108088	11144	0.00078915	11144	0.0435375	11144	1.73807	11144	3.53353
11145	0.0010019	11145	0.00119729	11145	0.00142532	11145	0.028394	11145	1.45814	11145	4.17682
11146	0.00119971	11146	0.00134369	11146	0.00308929	11146	0.0188026	11146	2.16237	11146	3.34935
11147	0.00126082	11147	0.00149807	11147	0.00514988	11147	0.0127578	11147	1.10098	11147	1.81048
11148	0.0010835	11148	0.00163102	11148	0.00558173	11148	0.00882542	11148	0.581397	11148	0.691325
11149	0.000745797	11149	0.00172396	11149	0.0038572	11149	0.00618323	11149	0.426514	11149	0.206866
11150	0.00042755	11150	0.00179706	11150	0.00192868	11150	0.00442651	11150	0.213542	11150	0.0569978
11151	0.000224327	11151	0.0019266	11151	0.00144793	11151	0.00335542	11151	0.124358	11151	0.0177474
11152	0.000122501	11152	0.00225487	11152	0.00354375	11152	0.00285412	11152	0.0464943	11152	0.00765937
11153	7.88758e-05	11153	0.00303919	11153	0.0110382	11153	0.00288515	11153	0.0313361	11153	0.0052177
11154	6.46057e-05	11154	0.0047956	11154	0.0341404	11154	0.003551	11154	0.0714277	11154	0.00557253
11155	6.71994e-05	11155	0.00851322	11155	0.120373	11155	0.00515934	11155	0.110466	11155	0.00810597
11156	8.25582e-05	11156	0.0155569	11156	0.340305	11156	0.00816649	11156	0.242407	11156	0.0130634
11157	0.000107865	11157	0.0263003	11157	0.562534	11157	0.0127587	11157	0.890778	11157	0.0192311
11158	0.000136659	11158	0.0377203	11158	0.516413	11158	0.0181585	11158	2.38052	11158	0.0227023
11159	0.000159839	11159	0.0441661	11159	0.268319	11159	0.0226842	11159	2.21314	11159	0.0204032
11160	0.00017303	11160	0.0430443	11160	0.103232	11160	0.0251272	11160	2.11218	11160	0.0142599
11161	0.000180923	11161	0.0372847	11161	0.147971	11161	0.025734	11161	2.70834	11161	0.00837087
11162	0.000193429	11162	0.0311175	11162	0.593546	11162	0.0254712	11162	1.76604	11162	0.00459
11163	0.000220356	11163	0.0264515	11163	1.90253	11163	0.0247806	11163	1.53894	11163	0.00260687
11164	0.00026915	11164	0.0229267	11164	4.32495	11164	0.0231177	11164	3.12832	11164	0.00164751
11165	0.000343044	11165	0.0192434	11165	7.39198	11165	0.0195567	11165	2.73878	11165	0.00119099
11166	0.000438227	11166	0.0145697	11166	9.62732	11166	0.0141737	11166	2.87635	11166	0.000978269
11167	0.00054515	11167	0.00951421	11167	9.1228	11167	0.00859834	11167	1.9943	11167	0.000897867
11168	0.000658512	11168	0.00544666	11168	6.07726	11168	0.00452346	11168	0.618991	11168	0.000916691
11169	0.000789062	11169	0.0029827	11169	3.00221	11169	0.0022805	11169	0.253851	11169	0.00105813
11170	0.000966201	11170	0.00178715	11170	1.42614	11170	0.00127188	11170	0.316052	11170	0.00142223
11171	0.00122957	11171	0.00132777	11171	1.0072	11171	0.000901273	11171	0.307198	11171	0.00228099
11172	0.00160823	11172	0.00128656	11172	1.07945	11172	0.000873608	11172	0.214788	11172	0.00436266
11173	0.00207875	11173	0.00153763	11173	1.37288	11173	0.0011296	11173	0.455426	11173	0.00959448
11174	0.0025186	11174	0.00197789	11174	1.89952	11174	0.00174929	11174	0.475832	11174	0.0226604
11175	0.00273213	11175	0.00234474	11175	2.53878	11175	0.00282534	11175	0.70514	11175	0.0528322
11176	0.00259567	11176	0.00228006	11176	2.94723	11176	0.00423287	11176	1.43205	11176	0.112119
11177	0.00217953	11177	0.00173652	11177	2.9105	11177	0.00549264	11177	0.436612	11177	0.203208
11178	0.00167871	11178	0.00106653	11178	2.38292	11178	0.00607207	11178	0.344998	11178	0.302153
11179	0.00125124	11179	0.00057757	11179	1.54839	11179	0.00585683	11179	0.274993	11179	0.361955
11180	0.000952987	11180	0.000310661	11180	0.858736	11180	0.00516188	11180	0.053954	11180	0.34866
11181	0.000773289	11181	0.000185553	11181	0.495987	11181	0.00437093	11181	0.030741	11181	0.272374
11182	0.000683571	11182	0.000132502	11182	0.291046	11182	0.00370469	11182	0.0366133	11182	0.175481
11183	0.000660447	11183	0.000116191	11183	0.149437	11183	0.00322914	11183	0.0190649	11183	0.0959452
11184	0.000689862	11184	0.000124195	11184	0.0750413	11184	0.00294426	11184	0.0133338	11184	0.0467399
11185	0.000763846	11185	0.000158654	11185	0.0446557	11185	0.00284991	11185	0.0124871	11185	0.0219084
11186	0.000874865	11186	0.000237685	11186	0.0296962	11186	0.00297897	11186	0.0100345	11186	0.0109642
11187	0.00100884	11187	0.000408446	11187	0.0228895	11187	0.00341675	11187	0.00927262	11187	0.00654576
11188	0.00113856	11188	0.000772906	11188	0.0278554	11188	0.00431912	11188	0.00931	11188	0.00503673
11189	0.00122309	11189	0.00150014	11189	0.0542608	11189	0.00591358	11189	0.0103836	11189	0.00500847
11190	0.0012213	11190	0.00271241	11190	0.109352	11190	0.0084174	11190	0.0130343	11190	0.00593134
11191	0.00111784	11191	0.00413446	11191	0.163408	11191	0.0117951	11191	0.0192274	11191	0.00733445
11192	0.00093973	11192	0.00492201	11192	0.160599	11192	0.0154646	11192	0.0513515	11192	0.0083628
11193	0.000741622	11193	0.00443101	11193	0.102746	11193	0.0183786	11193	0.0433722	11193	0.00819544
11194	0.00057196	11194	0.00307529	11194	0.046307	11194	0.0196895	11194	0.030283	11194	0.00692274
11195	0.000453366	11195	0.00175471	11195	0.0189388	11195	0.0193555	11195	0.0220531	11195	0.00538742
11196	0.000387511	11196	0.000901831	11196	0.0121668	11196	0.0180096	11196	0.0152867	11196	0.00426267
11197	0.000369176	11197	0.000459293	11197	0.0185822	11197	0.0163934	11197	0.00900885	11197	0.00374686
11198	0.000396119	11198	0.000251044	11198	0.0396994	11198	0.0149999	11198	0.00646745	11198	0.00382739
11199	0.000472343	11199	0.0001554	11199	0.0686363	11199	0.0140536	11199	0.00995964	11199	0.00451009
11200	0.000605431	11200	0.000111875	11200	0.0876877	11200	0.0136153	11200	0.00210717	11200	0.00587429
11201	0.000795925	11201	9.39033e-05	11201	0.0897137	11201	0.0136467	11201	0.00075211	11201	0.00804344
11202	0.00101798	11202	9.02127e-05	11202	0.0763552	11202	0.0140035	11202	0.000808614	11202	0.0111774
11203	0.00120532	11203	9.56395e-05	11203	0.0544192	11203	0.0143988	11203	0.000768577	11203	0.0155974
11204	0.00127416	11204	0.000106496	11204	0.0434905	11204	0.0144371	11204	0.00031433	11204	0.0221446
11205	0.00118745	11205	0.000118051	11205	0.0646398	11205	0.0138051	11205	0.000245964	11205	0.0329263
11206	0.00099413	11206	0.000124339	11206	0.130769	11206	0.0125222	11206	0.000396176	11206	0.0529664
11207	0.000787991	11207	0.000120974	11207	0.266713	11207	0.0109725	11207	0.000204935	11207	0.0942284
11208	0.000639843	11208	0.00010854	11208	0.567127	11208	0.00965211	11208	7.84231e-05	11208	0.185289
11209	0.000579441	11209	9.22707e-05	11209	1.22366	11209	0.00892188	11209	6.22062e-05	11209	0.391454
11210	0.000622394	11210	7.81347e-05	11210	2.44166	11210	0.00898168	11210	5.68537e-05	11210	0.842517
11211	0.000802197	11211	6.99322e-05	11211	4.24444	11211	0.00998508	11211	0.00015666	11211	1.725
11212	0.00118506	11212	6.9572e-05	11212	6.21756	11212	0.0121455	11212	0.000333357	11212	3.12829
11213	0.00184119	11213	7.89515e-05	11213	7.1331	11213	0.0157846	11213	0.000756603	11213	4.72395
11214	0.00273812	11214	0.000101769	11214	5.84991	11214	0.0213515	11214	0.00145873	11214	5.69693
11215	0.00362728	11215	0.000144865	11215	3.26706	11215	0.0294718	11215	0.00301503	11215	5.40581
11216	0.00415061	11216	0.000218897	11216	1.29225	11216	0.0410444	11216	0.0104685	11216	4.09718
11217	0.00416836	11217	0.000337169	11217	0.439949	11217	0.0573151	11217	0.0364758	11217	2.59131
11218	0.00388938	11218	0.000509756	11218	0.239906	11218	0.0797686	11218	0.0291103	11218	1.46248
11219	0.00366212	11219	0.000729674	11219	0.37436	11219	0.109749	11219	0.0858021	11219	0.798129
11220	0.00378606	11220	0.000955122	11220	0.74149	11220	0.147919	11220	0.240105	11220	0.455762
11221	0.00455574	11221	0.00110893	11221	1.27906	11221	0.193739	11221	0.421459	11221	0.289274
11222	0.00644207	11222	0.00111761	11222	1.86954	11222	0.244688	11222	0.593096	11222	0.209731
11223	0.0102301	11223	0.000968061	11223	2.36892	11223	0.294517	11223	0.867098	11223	0.171858
11224	0.0167207	11224	0.000721283	11224	2.72876	11224	0.331321	11224	1.36478	11224	0.152923
11225	0.0253684	11225	0.000466829	11225	3.00438	11225	0.339745	11225	1.12498	11225	0.140607
11226	0.0325925	11226	0.0002679	11226	3.09803	11226	0.311235	11226	2.87079	11226	0.128867
11227	0.0334524	11227	0.000141679	11227	2.73599	11227	0.254693	11227	4.37955	11227	0.117276
11228	0.0271291	11228	7.37233e-05	11228	1.97422	11228	0.192144	11228	1.50297	11228	0.10966
11229	0.0180958	11229	4.14289e-05	11229	1.26565	11229	0.142275	11229	0.552233	11229	0.111812
11230	0.0107963	11230	2.78907e-05	11230	0.940226	11230	0.111711	11230	1.58369	11230	0.131299
11231	0.00641359	11231	2.43657e-05	11231	1.09784	11231	0.0991661	11231	1.23617	11231	0.180401
11232	0.00419248	11232	2.81855e-05	11232	1.8281	11232	0.102018	11232	1.94564	11232	0.278698
11233	0.00320916	11233	4.09444e-05	11233	3.40453	11233	0.118679	11233	3.7143	11233	0.445692
11234	0.00290401	11234	6.70947e-05	11234	6.49678	11234	0.146739	11234	9.44504	11234	0.672213
11235	0.00300172	11235	0.000109515	11235	11.4843	11235	0.179025	11235	20.0308	11235	0.889282
11236	0.00335719	11236	0.000159935	11236	17.7093	11236	0.20229	11236	30.4748	11236	0.994886
11237	0.00385816	11237	0.000195139	11237	23.5418	11237	0.203638	11237	34.0009	11237	0.941108
11238	0.00438268	11238	0.00019524	11238	24.9569	11238	0.180989	11238	41.8014	11238	0.774811
11239	0.00479359	11239	0.000165852	11239	19.1244	11239	0.145176	11239	22.1892	11239	0.58357
11240	0.0049595	11240	0.000129882	11240	10.4862	11240	0.110501	11240	17.3821	11240	0.428602
11241	0.00480189	11241	0.000104557	11241	4.91048	11241	0.0854974	11241	12.7782	11241	0.329117
11242	0.0043484	11242	9.54728e-05	11242	3.20151	11242	0.0720788	11242	10.2169	11242	0.281523
11243	0.0037384	11243	0.000103699	11243	4.13218	11243	0.0694164	11243	4.72686	11243	0.279837
11244	0.00315357	11244	0.000130912	11244	6.74238	11244	0.0769548	11244	5.69067	11244	0.326763
11245	0.00273314	11245	0.000177676	11245	9.59063	11245	0.0948709	11245	4.38319	11245	0.439795
11246	0.00254914	11246	0.000236577	11246	11.0415	11246	0.122111	11246	7.56171	11246	0.658405
11247	0.00264265	11247	0.000290281	11247	10.8239	11247	0.153013	11247	3.96021	11247	1.05757
11248	0.00307927	11248	0.000325567	11248	10.0707	11248	0.176376	11248	2.67734	11248	1.77387
11249	0.00400936	11249	0.000350679	11249	9.33573	11249	0.181408	11249	3.54848	11249	3.04795
11250	0.00576272	11250	0.000396243	11250	8.09151	11250	0.166525	11250	2.33233	11250	5.26456
11251	0.00904485	11251	0.00051439	11251	6.14073	11251	0.140112	11251	1.39264	11251	8.90456
11252	0.0153464	11252	0.000808506	11252	4.16083	11252	0.112464	11252	1.13008	11252	14.2345
11253	0.0277097	11253	0.00152069	11253	2.98509	11253	0.0892037	11253	1.80057	11253	20.6669
11254	0.0518746	11254	0.00318772	11254	2.90916	11254	0.0710531	11254	3.18094	11254	26.3467
11255	0.0972283	11255	0.00674001	11255	3.5781	11255	0.0566491	11255	4.41323	11255	29.0089
11256	0.175815	11256	0.0131098	11256	4.15433	11256	0.0448815	11256	12.9489	11256	27.8305
11257	0.296964	11257	0.0220858	11257	4.05609	11257	0.0356663	11257	14.2884	11257	24.0791
11258	0.456855	11258	0.031503	11258	3.72408	11258	0.0294552	11258	6.12352	11258	19.758
11259	0.627351	11259	0.0382839	11259	4.09647	11259	0.0265904	11259	7.58686	11259	16.1453
11260	0.755402	11260	0.0404555	11260	5.58718	11260	0.0272916	11260	12.2223	11260	13.5446
11261	0.786408	11261	0.0380004	11261	7.36846	11261	0.0319947	11261	11.9981	11261	11.734
11262	0.704617	11262	0.0323054	11262	7.71495	11262	0.0414091	11262	24.427	11262	10.3918
11263	0.550001	11263	0.0252382	11263	6.08186	11263	0.0559273	11263	19.7119	11263	9.32056
11264	0.385969	11264	0.018402	11264	3.87761	11264	0.0745362	11264	15.0955	11264	8.49726
11265	0.254916	11265	0.0127198	11265	2.4832	11265	0.0941392	11265	12.4584	11265	8.00393
11266	0.166359	11266	0.00842953	11266	2.08953	11266	0.110351	11266	14.0211	11266	7.92797
11267	0.111651	11267	0.00536423	11267	2.37956	11267	0.119592	11267	19.3942	11267	8.30047
11268	0.0790791	11268	0.00324653	11268	3.07837	11268	0.120844	11268	11.8	11268	9.05918
11269	0.0599167	11269	0.00183948	11269	4.22981	11269	0.115551	11269	5.98739	11269	10.0083
11270	0.0488689	11270	0.00096409	11270	6.36558	11270	0.105905	11270	7.1309	11270	10.8105
11271	0.0429327	11271	0.000468475	11271	9.61364	11271	0.093178	11271	10.3922	11271	11.0889
11272	0.0403191	11272	0.000216111	11272	12.6138	11272	0.0775465	11272	9.78648	11272	10.6388
11273	0.0397147	11273	9.90574e-05	11273	13.9996	11273	0.0594327	11273	10.9405	11273	9.58504
11274	0.0398467	11274	4.79396e-05	11274	14.5354	11274	0.0408928	11274	16.8253	11274	8.31363
11275	0.0394038	11275	2.6104e-05	11275	15.6374	11275	0.0250752	11275	4.90369	11275	7.2394
11276	0.03739	11276	1.68614e-05	11276	17.0745	11276	0.0140277	11276	1.99588	11276	6.6422
11277	0.033655	11277	1.33515e-05	11277	17.7079	11277	0.007578	11277	1.14207	11277	6.67579
11278	0.0290175	11278	1.30959e-05	11278	16.9071	11278	0.0042859	11278	0.740718	11278	7.46296
11279	0.0247554	11279	1.57691e-05	11279	14.8924	11279	0.00276325	11279	0.299583	11279	9.15783
11280	0.021982	11280	2.27597e-05	11280	12.8284	11280	0.00217015	11280	0.140169	11280	11.9113
11281	0.0215133	11281	3.80114e-05	11281	12.2356	11281	0.00213957	11281	0.167119	11281	15.728
11282	0.0243029	11282	7.03274e-05	11282	13.8657	11282	0.00261815	11282	0.107966	11282	20.2834
11283	0.0322447	11283	0.000137499	11283	17.0253	11283	0.00379681	11283	0.11553	11283	24.8539
11284	0.0492368	11284	0.000271977	11284	20.2314	11284	0.00609979	11284	0.347798	11284	28.4895
11285	0.0821498	11285	0.000527049	11285	22.9384	11285	0.0100857	11285	0.583168	11285	30.3907
11286	0.14019	11286	0.000983666	11286	25.8837	11286	0.0160386	11286	1.48395	11286	30.282
11287	0.230102	11287	0.00175789	11287	29.6392	11287	0.0232195	11287	4.38578	11287	28.5307
11288	0.346871	11288	0.00299211	11288	33.1773	11288	0.029407	11288	1.78046	11288	25.9117
11289	0.465674	11289	0.00477216	11289	33.8458	11289	0.0317768	11289	1.0907	11289	23.2021
11290	0.544434	11290	0.00690769	11290	30.0081	11290	0.029	11290	1.68466	11290	20.8993
11291	0.542762	11291	0.00870751	11291	23.6279	11291	0.0224758	11291	0.525532	11291	19.1786
11292	0.451713	11292	0.00921512	11292	18.3074	11292	0.0151304	11292	0.29256	11292	18.0005
11293	0.309099	11293	0.00804817	11293	15.9333	11293	0.00920303	11293	0.124143	11293	17.2435
11294	0.174349	11294	0.0058664	11294	16.8366	11294	0.00533814	11294	0.060196	11294	16.8035
11295	0.0838148	11295	0.00371583	11295	21.2822	11295	0.00314903	11295	0.0391376	11295	16.6483
11296	0.0369547	11296	0.00217843	11296	28.8246	11296	0.00202583	11296	0.0343929	11296	16.8292
11297	0.0167179	11297	0.00127453	11297	36.6824	11297	0.00152179	11297	0.0652997	11297	17.4573
11298	0.0088575	11298	0.000802488	11298	41.1858	11298	0.00140978	11298	0.159133	11298	18.6607
11299	0.00616101	11299	0.000578967	11299	42.1323	11299	0.00164704	11299	0.317976	11299	20.5276
11300	0.0059254	11300	0.000497246	11300	43.0171	11300	0.0023619	11300	0.747144	11300	23.0384
11301	0.00762213	11301	0.000512038	11301	45.0662	11301	0.00384394	11301	3.59409	11301	26.0034
11302	0.0118501	11302	0.000619974	11302	45.3783	11302	0.00636512	11302	12.3695	11302	29.056
11303	0.0196601	11303	0.0008554	11303	42.0695	11303	0.00965416	11303	13.009	11303	31.7563
11304	0.0313919	11304	0.00130965	11304	36.2906	11304	0.0125345	11304	24.0248	11304	33.7794
11305	0.0455467	11305	0.00219274	11305	30.398	11305	0.0137739	11305	22.904	11305	35.0598
11306	0.059491	11306	0.00397664	11306	26.8692	11306	0.0133958	11306	11.6914	11306	35.7786
11307	0.0717281	11307	0.00766711	11307	26.9417	11307	0.0125079	11307	9.85507	11307	36.2193
11308	0.0829342	11308	0.0151519	11308	30.0658	11308	0.0122098	11308	7.70831	11308	36.6134
11309	0.0948863	11309	0.0292153	11309	35.3378	11309	0.0131753	11309	3.48042	11309	37.0555
11310	0.108946	11310	0.0524722	11310	41.4672	11310	0.0158696	11310	6.98015	11310	37.4882
11311	0.125319	11311	0.0853403	11311	45.5354	11311	0.0207384	11311	8.79796	11311	37.7298
11312	0.143151	11312	0.125019	11312	45.5394	11312	0.0281594	11312	3.93061	11312	37.528
11313	0.161061	11313	0.166537	11313	43.3328	11313	0.0382868	11313	5.80087	11313	36.6444
11314	0.177324	11314	0.203461	11314	41.8026	11314	0.050906	11314	9.25376	11314	34.9622
11315	0.18928	11315	0.226765	11315	41.2009	11315	0.0650966	11315	13.3596	11315	32.5689
11316	0.19277	11316	0.225805	11316	39.801	11316	0.0784652	11316	34.37	11316	29.7471
11317	0.183514	11317	0.1959	11317	36.7924	11317	0.0866725	11317	95.5342	11317	26.8653
11318	0.160858	11318	0.146348	11318	33.6464	11318	0.085201	11318	96.8814	11318	24.2402
11319	0.130305	11319	0.0956959	11319	31.6735	11319	0.0735279	11319	259.305	11319	22.0563
11320	0.100725	11320	0.0575113	11320	30.2183	11320	0.0568973	11320	333.468	11320	20.3709
11321	0.078848	11321	0.0341531	11321	29.0128	11321	0.0422056	11321	395.809	11321	19.1705
11322	0.0671725	11322	0.0216326	11322	29.5587	11322	0.0333123	11322	217.681	11322	18.4311
11323	0.0660932	11323	0.0154747	11323	32.6781	11323	0.0312201	11323	143.921	11323	18.1549
11324	0.0768409	11324	0.0127717	11324	36.5619	11324	0.0372088	11324	123.642	11324	18.3754
11325	0.103145	11325	0.0119537	11325	38.9419	11325	0.0560437	11325	78.6269	11325	19.1376
11326	0.150763	11326	0.0121272	11326	39.8821	11326	0.0986756	11326	105.324	11326	20.4641
11327	0.223431	11327	0.0126138	11327	40.2991	11327	0.181313	11327	49.8399	11327	22.3115
11328	0.315295	11328	0.0128003	11328	39.747	11328	0.312702	11328	68.8789	11328	24.523
11329	0.405975	11329	0.0122649	11329	37.8473	11329	0.471168	11329	44.8085	11329	26.7986
11330	0.466922	11330	0.0109567	11330	35.4564	11330	0.601149	11330	43.9778	11330	28.7206
11331	0.477078	11331	0.00915899	11331	33.5542	11331	0.649844	11331	30.8145	11331	29.8669
11332	0.43434	11332	0.00725085	11332	32.406	11332	0.605602	11332	19.6785	11332	29.9884
11333	0.354416	11333	0.00550588	11333	31.4274	11333	0.495925	11333	11.0364	11333	29.1536
11334	0.261104	11334	0.00405213	11334	30.3205	11334	0.361101	11334	9.91147	11334	27.7462
11335	0.175677	11335	0.00292388	11335	30.0988	11335	0.235092	11335	5.45973	11335	26.2984
11336	0.110176	11336	0.00211014	11336	31.2938	11336	0.138347	11336	7.93824	11336	25.2545
11337	0.0665745	11337	0.00157665	11337	31.8472	11337	0.0761127	11337	6.52886	11337	24.7669
11338	0.0405802	11338	0.00128218	11338	29.1617	11338	0.0420285	11338	1.85648	11338	24.5396
11339	0.026341	11339	0.00120465	11339	24.2663	11339	0.0259727	11339	0.706818	11339	23.7655
11340	0.0192142	11340	0.00138456	11340	20.9785	11340	0.0203414	11340	0.74343	11340	21.4303
11341	0.0164245	11341	0.00202114	11341	21.3946	11341	0.0222171	11341	0.425481	11341	17.1856
11342	0.0167489	11342	0.0037419	11342	25.2123	11342	0.0345742	11342	0.556291	11342	12.0236
11343	0.0200656	11343	0.00833067	11343	31.3912	11343	0.0714916	11343	0.942156	11343	7.55335
11344	0.0268813	11344	0.0201444	11344	37.3515	11344	0.17103	11344	0.839715	11344	4.63542
11345	0.0374418	11345	0.0465129	11345	39.733	11345	0.402197	11345	1.70932	11345	3.14381
11346	0.0502423	11346	0.0905286	11346	38.1869	11346	0.802915	11346	5.73082	11346	2.65262
11347	0.0613299	11347	0.135428	11347	35.3371	11347	1.22549	11347	8.71949	11347	2.94908
11348	0.0666187	11348	0.1492	11348	33.4816	11348	1.35839	11348	4.21854	11348	4.16514
11349	0.0655996	11349	0.122358	11349	32.919	11349	1.0976	11349	1.47627	11349	6.66709
11350	0.061633	11350	0.0790484	11350	32.4226	11350	0.68337	11350	0.996728	11350	10.529
11351	0.0589288	11351	0.0438523	11351	31.5039	11351	0.362063	11351	0.560714	11351	14.6987
11352	0.0605262	11352	0.022975	11352	31.4517	11352	0.185631	11352	0.347788	11352	17.2297
11353	0.0686211	11353	0.0123847	11353	33.1158	11353	0.105251	11353	0.351186	11353	17.1524
11354	0.0858633	11354	0.00734015	11354	35.6104	11354	0.0733561	11354	0.211625	11354	15.4127
11355	0.117075	11355	0.00501316	11355	38.0568	11355	0.0659607	11355	0.255851	11355	13.6227
11356	0.172691	11356	0.00406985	11356	40.3482	11356	0.0751365	11356	0.450313	11356	12.8385
11357	0.277314	11357	0.00398133	11357	41.7366	11357	0.101382	11357	0.527646	11357	13.5356
11358	0.4911	11358	0.00464015	11358	40.7901	11358	0.14907	11358	0.452164	11358	15.9859
11359	0.962777	11359	0.0061799	11359	37.8069	11359	0.222751	11359	0.578101	11359	20.3239
11360	2.0539	11360	0.00881328	11360	35.3264	11360	0.325311	11360	0.548617	11360	26.1883
11361	4.5901	11361	0.0125733	11361	34.9569	11361	0.461707	11361	0.630033	11361	32.3265
11362	10.2364	11362	0.0171072	11362	35.5578	11362	0.647757	11362	0.985966	11362	36.9276
11363	21.7225	11363	0.0218811	11363	35.2952	11363	0.915625	11363	0.75703	11363	38.8171
11364	42.1295	11364	0.0266958	11364	34.1882	11364	1.30228	11364	1.47407	11364	38.3123
11365	72.2824	11365	0.0318358	11365	33.3235	11365	1.80104	11365	2.87731	11365	36.7836
11366	106.927	11366	0.0375643	11366	32.4936	11366	2.27829	11366	4.52137	11366	35.6134
11367	134.064	11367	0.0433633	11367	31.1227	11367	2.46626	11367	8.45178	11367	35.5906
11368	141.899	11368	0.0475993	11368	30.0727	11368	2.18065	11368	6.49733	11368	36.8491
11369	128.571	11369	0.0483294	11369	29.8719	11369	1.56054	11369	4.80807	11369	38.9945
11370	103.007	11370	0.0449594	11370	29.6313	11370	0.933081	11370	1.61104	11370	41.287
11371	76.3268	11371	0.0389427	11371	29.2457	11371	0.496232	11371	0.984144	11371	42.963
11372	54.7749	11372	0.0326282	11372	29.7181	11372	0.252869	11372	0.247319	11372	43.6248
11373	39.4329	11373	0.0278005	11373	31.4921	11373	0.132024	11373	0.117241	11373	43.4123
11374	28.9852	11374	0.0253451	11374	34.1576	11374	0.074155	11374	0.0610808	11374	42.8127
11375	21.7918	11375	0.0257875	11375	36.6194	11375	0.046258	11375	0.03167	11375	42.3089
11376	16.6449	11376	0.029996	11376	37.7127	11376	0.0327959	11376	0.0176827	11376	42.1408
11377	12.8199	11377	0.0397486	11377	37.2909	11377	0.0269169	11377	0.00638971	11377	42.2662
11378	9.91682	11378	0.057828	11378	35.7226	11378	0.0257492	11378	0.00381424	11378	42.4579
11379	7.70687	11379	0.086493	11379	33.4268	11379	0.0282003	11379	0.00477758	11379	42.4493
11380	6.044	11380	0.123115	11380	32.055	11380	0.033666	11380	0.00618122	11380	42.0553
11381	4.82667	11381	0.156343	11381	33.4529	11381	0.0408132	11381	0.00940382	11381	41.2236
11382	3.97956	11382	0.171805	11382	36.7732	11382	0.0467913	11382	0.0150126	11382	40.0232
11383	3.44094	11383	0.165726	11383	39.317	11383	0.0482592	11383	0.0230198	11383	38.607
11384	3.15473	11384	0.148234	11384	40.198	11384	0.0440183	11384	0.0353867	11384	37.1755
11385	3.06523	11385	0.132765	11385	40.6294	11385	0.0360532	11385	0.044438	11385	35.9359
11386	3.11072	11386	0.128065	11386	40.4497	11386	0.0275456	11386	0.0755256	11386	35.0516
11387	3.21858	11387	0.139415	11387	38.2488	11387	0.0206054	11387	0.22208	11387	34.5898
11388	3.31244	11388	0.173481	11388	35.0148	11388	0.0158326	11388	0.261518	11388	34.4874
11389	3.33511	11389	0.243065	11389	32.9485	11389	0.0130157	11389	0.412026	11389	34.5525
11390	3.27167	11390	0.371748	11390	32.5111	11390	0.0117998	11390	0.567948	11390	34.5148
11391	3.15131	11391	0.597103	11391	34.1284	11391	0.0120124	11391	0.900037	11391	34.1213
11392	3.02781	11392	0.964596	11392	39.0794	11392	0.0137983	11392	1.35444	11392	33.2478
11393	2.95699	11393	1.49644	11393	46.5994	11393	0.0177351	11393	1.01502	11393	31.9648
11394	2.98434	11394	2.13095	11394	53.0371	11394	0.0250247	11394	2.08533	11394	30.5121
11395	3.14124	11395	2.68319	11395	55.0318	11395	0.0377962	11395	2.42255	11395	29.1942
11396	3.44008	11396	2.919	11396	51.9955	11396	0.059506	11396	4.32182	11396	28.2568
11397	3.86057	11397	2.72737	11397	45.3821	11397	0.09527	11397	3.06431	11397	27.8037
11398	4.33079	11398	2.21022	11398	37.4445	11398	0.151545	11398	3.11003	11398	27.7751
11399	4.72777	11399	1.58575	11399	31.1857	11399	0.233728	11399	5.0714	11399	27.9845
11400	4.92721	11400	1.03286	11400	29.5435	11400	0.339724	11400	7.39594	11400	28.2092
11401	4.88479	11401	0.625684	11401	33.4756	11401	0.450328	11401	5.63566	11401	28.3107
11402	4.67105	11402	0.359559	11402	41.2902	11402	0.526069	11402	7.78112	11402	28.324
11403	4.4184	11403	0.198848	11403	48.9841	11403	0.525504	11403	8.53097	11403	28.4579
11404	4.23737	11404	0.106946	11404	52.2511	11404	0.440111	11404	7.81609	11404	29.0139
11405	4.17069	11405	0.0565202	11405	49.4832	11405	0.307972	11405	4.55287	11405	30.2741
11406	4.19137	11406	0.0298056	11406	42.0629	11406	0.183349	11406	6.88881	11406	32.3886
11407	4.22471	11407	0.0160785	11407	33.5759	11407	0.0970562	11407	5.84737	11407	35.2426
11408	4.1881	11408	0.00920146	11408	27.5744	11408	0.0491133	11408	1.7646	11408	38.31
11409	4.03795	11409	0.00584439	11409	24.2112	11409	0.0261691	11409	1.05282	11409	40.6235
11410	3.79145	11410	0.00431008	11410	21.6129	11410	0.016312	11410	1.31871	11410	41.088
11411	3.50492	11411	0.00381068	11411	19.4354	11411	0.0129502	11411	0.475682	11411	39.1417
11412	3.23514	11412	0.00406559	11412	19.0102	11412	0.0135205	11412	0.552191	11412	35.2493
11413	3.01956	11413	0.00510809	11413	22.1072	11413	0.017859	11413	1.04027	11413	30.6664
11414	2.88096	11414	0.00718662	11414	29.798	11414	0.0270836	11414	1.24641	11414	26.6962
11415	2.84104	11415	0.0106257	11415	40.1773	11415	0.0418612	11415	1.53865	11415	24.1719
11416	2.93034	11416	0.0155184	11416	47.9571	11416	0.0595633	11416	2.57284	11416	23.4581
11417	3.19169	11417	0.0212958	11417	48.4274	11417	0.0735268	11417	2.11172	11417	24.6918
11418	3.67786	11418	0.026558	11418	41.404	11418	0.0779475	11418	1.35077	11418	27.937
11419	4.43815	11419	0.0295938	11419	30.8112	11419	0.0732322	11419	2.23583	11419	33.1341
11420	5.48412	11420	0.0294011	11420	21.1679	11420	0.0645378	11420	0.722372	11420	39.9008
11421	6.73569	11421	0.0263359	11421	14.7732	11421	0.056799	11421	0.345048	11421	47.3623
11422	7.98603	11422	0.0217875	11422	11.4547	11422	0.0525418	11422	0.186913	11422	54.2202
11423	8.95539	11423	0.0172519	11423	10.268	11423	0.0526264	11423	0.0748457	11423	59.1102
11424	9.44951	11424	0.0136522	11424	10.7592	11424	0.057519	11424	0.0662277	11424	61.0536
11425	9.5066	11425	0.0112667	11425	11.7403	11425	0.0681143	11425	0.183448	11425	59.7441
11426	9.39296	11426	0.0100052	11426	10.9686	11426	0.086293	11426	0.185042	11426	55.5552
11427	9.47345	11427	0.00967004	11427	8.21163	11427	0.115584	11427	0.137234	11427	49.3329
11428	10.1081	11428	0.0100674	11428	5.648	11428	0.162116	11428	0.129263	11428	42.1151
11429	11.6526	11429	0.0110108	11429	4.68799	11429	0.235646	11429	0.358884	11429	34.8948
11430	14.5107	11430	0.0123077	11430	5.3258	11430	0.349565	11430	0.927382	11430	28.4625
11431	19.139	11431	0.0137878	11431	7.47615	11431	0.516973	11431	0.792173	11431	23.3188
11432	25.906	11432	0.0153442	11432	11.5486	11432	0.738123	11432	0.454923	11432	19.6608
11433	34.7618	11433	0.0169035	11433	18.7054	11433	0.978524	11433	0.39635	11433	17.4472
11434	44.8299	11434	0.0183119	11434	31.0497	11434	1.15552	11434	0.711197	11434	16.5018
11435	54.2831	11435	0.01926	11435	49.6844	11435	1.17149	11435	0.738428	11435	16.5865
11436	60.9143	11436	0.0194216	11436	68.2854	11436	0.996459	11436	0.794416	11436	17.4235
11437	63.2782	11437	0.0187951	11437	73.7038	11437	0.711324	11437	0.992398	11437	18.7115
11438	61.525	11438	0.0179176	11438	62.1105	11438	0.438936	11438	0.487222	11438	20.197
11439	57.1685	11439	0.0177225	11439	45.0204	11439	0.247918	11439	0.20419	11439	21.7769
11440	52.0942	11440	0.0193632	11440	33.4795	11440	0.137839	11440	0.456441	11440	23.5321
11441	47.7158	11441	0.0244916	11441	28.8016	11441	0.0807083	11441	0.412444	11441	25.6332
11442	44.7118	11442	0.0361051	11442	29.8967	11442	0.051909	11442	0.370347	11442	28.163
11443	43.1446	11443	0.0595565	11443	38.4573	11443	0.0370255	11443	1.50454	11443	30.9233
11444	42.646	11444	0.102094	11444	52.3653	11444	0.028939	11444	3.3675	11444	33.2953
11445	42.5752	11445	0.167823	11445	61.9201	11445	0.0244733	11445	2.64083	11445	34.2798
11446	42.2332	11446	0.248523	11446	60.9995	11446	0.022442	11446	4.30218	11446	32.877
11447	41.182	11447	0.321477	11447	53.857	11447	0.0226924	11447	4.72257	11447	28.7508
11448	39.4907	11448	0.363777	11448	45.7414	11448	0.0257234	11448	2.12408	11448	22.6925
11449	37.6627	11449	0.368876	11449	37.7177	11449	0.0326006	11449	0.780798	11449	16.2997
11450	36.2726	11450	0.345811	11450	30.6783	11450	0.0447268	11450	0.588306	11450	11.0107
11451	35.6039	11451	0.30685	11451	24.8575	11451	0.0627024	11451	0.61746	11451	7.41169
11452	35.4853	11452	0.259836	11452	18.9125	11452	0.0838524	11452	0.567572	11452	5.34886
11453	35.3607	11453	0.209155	11453	13.4519	11453	0.100402	11453	0.539846	11453	4.43351
11454	34.6008	11454	0.159491	11454	10.4282	11454	0.102847	11454	1.01844	11454	4.39544
11455	32.9557	11455	0.116651	11455	9.99781	11455	0.0883063	11455	1.36218	11455	5.1799
11456	30.8102	11456	0.0850626	11456	11.4729	11456	0.0641144	11456	1.03486	11456	6.87009
11457	28.9982	11457	0.0659199	11457	14.4886	11457	0.0410293	11457	0.936902	11457	9.43675
11458	28.4184	11458	0.0584297	11458	17.4665	11458	0.0249803	11458	0.86241	11458	12.3975
11459	29.85	11459	0.0627083	11459	18.1053	11459	0.0160934	11459	0.895701	11459	14.8355
11460	34.0186	11460	0.0827051	11460	17.2095	11460	0.0123072	11460	0.628999	11460	16.0657
11461	41.656	11461	0.128871	11461	18.3608	11461	0.0121508	11461	0.528015	11461	16.2256
11462	53.2601	11462	0.217776	11462	23.0155	11462	0.0156701	11462	0.8082	11462	16.0503
11463	68.4294	11463	0.358447	11463	30.1748	11463	0.0245174	11463	1.4571	11463	16.284
11464	85.1034	11464	0.520598	11464	39.6046	11464	0.0408637	11464	2.39752	11464	17.3955
11465	99.617	11465	0.62565	11465	48.5875	11465	0.063602	11465	2.05429	11465	19.5722
11466	108.212	11466	0.612868	11466	48.0507	11466	0.0848217	11466	3.26993	11466	22.7158
11467	109.12	11467	0.506872	11467	35.0231	11467	0.0950469	11467	2.26139	11467	26.3577
11468	103.313	11468	0.380431	11468	20.72	11468	0.0930924	11468	1.60837	11468	29.6412
11469	93.3531	11469	0.28166	11469	13.7308	11469	0.0854896	11469	1.28061	11469	31.5701
11470	81.684	11470	0.219468	11470	10.9921	11470	0.0784714	11470	0.984411	11470	31.5037
11471	69.7968	11471	0.184879	11471	8.03247	11471	0.0741847	11471	0.835287	11471	29.5427
11472	58.4284	11472	0.166934	11472	4.8156	11472	0.0716542	11472	1.10653	11472	26.4562
11473	48.1162	11473	0.157766	11473	3.02283	11473	0.0688791	11473	1.51244	11473	23.2211
11474	39.464	11474	0.153424	11474	3.57797	11474	0.0648044	11474	0.651288	11474	20.5827
11475	32.99	11475	0.153308	11475	7.24531	11475	0.0603223	11475	0.831718	11475	18.9004
11476	28.8798	11476	0.158573	11476	16.5028	11476	0.0576635	11476	1.16307	11476	18.2172
11477	26.9054	11477	0.170196	11477	35.8511	11477	0.0592786	11477	1.10893	11477	18.3636
11478	26.4064	11478	0.187594	11478	64.6548	11478	0.0675839	11478	1.81386	11478	19.002
11479	26.1902	11479	0.208309	11479	93.9683	11479	0.0852921	11479	3.25464	11479	19.655
11480	24.6709	11480	0.229227	11480	116.335	11480	0.114842	11480	3.11513	11480	19.8085
11481	20.8258	11481	0.2488	11481	123.831	11481	0.155356	11481	3.46371	11481	19.1071
11482	15.3493	11482	0.268248	11482	110.605	11482	0.19775	11482	5.04686	11482	17.5208
11483	10.1491	11483	0.290573	11483	88.1827	11483	0.224377	11483	7.67184	11483	15.3466
11484	6.54788	11484	0.318559	11484	69.7004	11484	0.220417	11484	6.2231	11484	13.0464
11485	4.64262	11485	0.353581	11485	53.9224	11485	0.18825	11485	6.29316	11485	11.0435
11486	4.02576	11486	0.395857	11486	37.913	11486	0.145313	11486	7.99595	11486	9.60583
11487	4.45392	11487	0.445493	11487	23.4404	11487	0.108179	11487	5.50468	11487	8.85161
11488	6.00313	11488	0.502895	11488	13.2264	11488	0.0835205	11488	4.96908	11488	8.82863
11489	8.81627	11489	0.567298	11489	8.2227	11489	0.0708871	11489	4.72901	11489	9.60087
11490	12.4571	11490	0.633672	11490	7.1356	11490	0.0680417	11490	4.98599	11490	11.3117
11491	15.4845	11491	0.690094	11491	8.04144	11491	0.0736326	11491	6.08851	11491	14.2249
11492	16.421	11492	0.718622	11492	9.1573	11492	0.0876852	11492	6.10018	11492	18.739
11493	15.2811	11493	0.701387	11493	9.12325	11493	0.111213	11493	3.43835	11493	25.3138
11494	13.3872	11494	0.629693	11494	7.97409	11494	0.145206	11494	5.03191	11494	34.1539
11495	12.0207	11495	0.51085	11495	6.82616	11495	0.188476	11495	2.83705	11495	44.5048
11496	11.8505	11496	0.36807	11496	6.12004	11496	0.234224	11496	2.81099	11496	53.8521
11497	13.1929	11497	0.231907	11497	5.61026	11497	0.267791	11497	4.30267	11497	58.2268
11498	16.2616	11498	0.126591	11498	5.51604	11498	0.271267	11498	2.50717	11498	54.6858
11499	20.9979	11499	0.0600949	11499	6.13623	11499	0.236763	11499	1.58589	11499	44.1828
11500	26.5763	11500	0.0254289	11500	7.39204	11500	0.176373	11500	1.06326	11500	31.1147
11501	31.2505	11501	0.0101018	11501	9.17679	11501	0.114072	11501	0.50603	11501	19.7583
11502	33.283	11502	0.00408453	11502	10.7112	11502	0.0672665	11502	0.437074	11502	11.8522
11503	32.3178	11503	0.00186365	11503	10.354	11503	0.0391629	11503	0.173108	11503	7.04096
11504	29.5589	11504	0.00106917	11504	7.76866	11504	0.0248426	11504	0.12271	11504	4.29952
11505	26.6639	11505	0.000841278	11505	4.73094	11505	0.0188601	11505	0.0947746	11505	2.75914
11506	24.7785	11506	0.00094426	11506	2.68261	11506	0.0182127	11506	0.108751	11506	1.87754
11507	24.3817	11507	0.00147809	11507	1.54426	11507	0.0225704	11507	0.139808	11507	1.35765
11508	25.5162	11508	0.00298087	11508	0.985836	11508	0.034406	11508	0.232525	11508	1.0449
11509	27.9412	11509	0.00690231	11509	1.1326	11509	0.05982	11509	0.483475	11509	0.859477
11510	31.1418	11510	0.0161905	11510	2.44113	11510	0.108809	11510	1.04794	11510	0.760071
11511	34.3647	11511	0.0343397	11511	5.50273	11511	0.190841	11511	2.17067	11511	0.726341
11512	36.825	11512	0.0603013	11512	11.0302	11512	0.30098	11512	5.61639	11512	0.751368
11513	38.0065	11513	0.0829238	11513	19.0161	11513	0.403609	11513	7.95225	11513	0.838978
11514	37.8239	11514	0.087501	11514	25.3422	11514	0.44239	11514	12.1669	11514	1.00312
11515	36.5494	11515	0.0719845	11515	24.5497	11515	0.389549	11515	20.2096	11515	1.26663
11516	34.6191	11516	0.0486241	11516	18.0295	11516	0.279266	11516	14.737	11516	1.6549
11517	32.4759	11517	0.0293367	11517	10.9855	11517	0.171711	11517	13.3112	11517	2.17907
11518	30.4942	11518	0.017588	11518	5.70591	11518	0.0994043	11518	7.88642	11518	2.80914
11519	28.9594	11519	0.011698	11519	2.50978	11519	0.0613387	11519	6.0666	11519	3.45665
11520	28.0687	11520	0.00942723	11520	1.04169	11520	0.0458172	11520	6.24791	11520	3.99973
11521	27.9415	11521	0.00960799	11521	0.454426	11521	0.0453428	11521	7.97609	11521	4.35039
11522	28.6274	11522	0.0122296	11522	0.19455	11522	0.0606162	11522	7.9998	11522	4.50348
11523	30.0982	11523	0.0183189	11523	0.0866303	11523	0.103237	11523	8.36757	11523	4.51496
11524	32.2208	11524	0.0296646	11524	0.0610837	11524	0.200325	11524	11.875	11524	4.43703
11525	34.7349	11525	0.0476633	11525	0.0687353	11525	0.391054	11525	11.2483	11525	4.27576
11526	37.2874	11526	0.071109	11526	0.0763655	11526	0.693572	11526	22.3564	11526	4.00356
11527	39.5565	11527	0.0952269	11527	0.0673861	11527	1.05364	11527	69.4441	11527	3.6108
11528	41.4034	11528	0.114773	11528	0.0470455	11528	1.35621	11528	236.288	11528	3.14471
11529	42.9134	11529	0.128597	11529	0.0277443	11529	1.52369	11529	796.007	11529	2.69153
11530	44.2527	11530	0.140178	11530	0.0147194	11530	1.5744	11530	2028.24	11530	2.32317
11531	45.4413	11531	0.154361	11531	0.00857552	11531	1.57551	11531	3423.23	11531	2.06491
11532	46.2347	11532	0.17432	11532	0.00831622	11532	1.5768	11532	3924.18	11532	1.90033
11533	46.2615	11533	0.200236	11533	0.0124115	11533	1.5913	11533	3239.24	11533	1.79243
11534	45.3724	11534	0.229646	11534	0.0205147	11534	1.61342	11534	2119.83	11534	1.70508
11535	43.9099	11535	0.25984	11535	0.0338519	11535	1.6484	11535	1138.2	11535	1.61808
11536	42.6117	11536	0.291343	11536	0.0532393	11536	1.73166	11536	644.384	11536	1.52833
11537	42.2232	11537	0.329395	11537	0.0735291	11537	1.92897	11537	441.766	11537	1.43619
11538	43.1202	11538	0.381876	11538	0.0851679	11538	2.32659	11538	335.409	11538	1.33063
11539	45.0833	11539	0.454719	11539	0.0995225	11539	3.01045	11539	391.529	11539	1.18877
11540	47.2285	11540	0.545933	11540	0.181667	11540	3.99797	11540	744.672	11540	0.994997
11541	48.2277	11541	0.64091	11541	0.449564	11541	5.10726	11541	922.428	11541	0.76475
11542	46.9591	11542	0.716379	11542	1.04107	11542	5.90348	11542	1186.6	11542	0.54245
11543	43.2509	11543	0.756408	11543	2.31655	11543	5.95519	11543	1061.68	11543	0.369431
11544	38.0229	11544	0.767033	11544	5.5663	11544	5.24412	11544	945.087	11544	0.259515
11545	32.6666	11545	0.773345	11545	12.1913	11545	4.18486	11545	548.793	11545	0.2051
11546	28.3023	11546	0.805138	11546	19.3445	11546	3.23233	11546	359.958	11546	0.196223
11547	25.4889	11547	0.887855	11547	21.0482	11547	2.61244	11547	239.767	11547	0.234019
11548	24.3526	11548	1.04302	11548	16.9253	11548	2.3686	11548	207.821	11548	0.3376
11549	24.8155	11549	1.29346	11549	11.8155	11549	2.51591	11549	205.457	11549	0.544331
11550	26.734	11550	1.67285	11550	8.0401	11550	3.16173	11550	380.758	11550	0.890114
11551	29.9542	11551	2.24419	11551	5.01712	11551	4.61373	11551	524.152	11551	1.36123
11552	34.3767	11552	3.1306	11552	2.59135	11552	7.53925	11552	591.706	11552	1.86553
11553	40.0813	11553	4.55246	11553	1.10493	11553	13.1829	11553	1302.02	11553	2.29393
11554	47.4375	11554	6.84476	11554	0.424054	11554	23.4139	11554	1683.69	11554	2.62184
11555	57.0373	11555	10.38	11555	0.168766	11555	39.8484	11555	1725.61	11555	2.92811
11556	69.3018	11556	15.2842	11556	0.0948289	11556	61.1828	11556	2660.49	11556	3.33745
11557	83.7305	11557	20.9946	11557	0.093244	11557	80.4422	11557	6310.24	11557	3.97327
11558	98.1228	11558	26.1427	11558	0.133136	11558	87.8115	11558	4251.52	11558	4.9497
11559	108.701	11559	29.2909	11559	0.232033	11559	79.6156	11559	3067.53	11559	6.38469
11560	111.901	11560	30.0223	11560	0.436765	11560	62.0159	11560	2493.86	11560	8.41802
11561	106.751	11561	29.1745	11561	0.752837	11561	44.0595	11561	2302.89	11561	11.2031
11562	95.4112	11562	28.0806	11562	1.06943	11562	30.6362	11562	1428.89	11562	14.7891
11563	81.3506	11563	27.7871	11563	1.22233	11563	22.187	11563	1251.53	11563	18.7967
11564	67.2717	11564	28.7885	11564	1.21423	11564	17.3657	11564	1043.22	11564	22.0163
11565	54.4459	11565	31.0386	11565	1.26468	11565	14.7485	11565	653.676	11565	22.6138
11566	43.2159	11566	33.9725	11566	1.45885	11566	13.2652	11566	563.228	11566	19.5935
11567	33.681	11567	36.6588	11567	1.60403	11567	12.1537	11567	545.486	11567	14.2044
11568	25.9905	11568	38.332	11568	1.59555	11568	10.9218	11568	615.905	11568	8.95416
11569	20.255	11569	39.0633	11569	1.52081	11569	9.40283	11569	1164.42	11569	5.36299
11570	16.3996	11570	39.9084	11570	1.33572	11570	7.76207	11570	1700.41	11570	3.44411
11571	14.1749	11571	42.4444	11571	0.930799	11571	6.32865	11571	601.117	11571	2.65632
11572	13.2731	11572	48.2832	11572	0.481582	11572	5.37474	11572	624.661	11572	2.61377
11573	13.4084	11573	58.7748	11573	0.243767	11573	5.04496	11573	271.66	11573	3.22414
11574	14.3202	11574	74.4451	11574	0.22184	11574	5.44209	11574	127.773	11574	4.57348
11575	15.7468	11575	93.9362	11575	0.305154	11575	6.7191	11575	88.4288	11575	6.62188
11576	17.4386	11576	113.447	11576	0.437662	11576	9.01518	11576	48.5717	11576	8.76543
11577	19.2081	11577	128.237	11577	0.577794	11577	12.1202	11577	27.5981	11577	9.88191
11578	20.9459	11578	135.596	11578	0.668968	11578	15.0847	11578	22.9549	11578	9.29973
11579	22.547	11579	136.325	11579	0.712983	11579	16.5477	11579	15.1298	11579	7.50213
11580	23.7989	11580	133.409	11580	0.719882	11580	15.9276	11580	15.4065	11580	5.50537
11581	24.3504	11581	129.726	11581	0.64168	11581	13.9805	11581	22.3129	11581	3.95787
11582	23.8539	11582	126.697	11582	0.536756	11582	11.9561	11582	18.6464	11582	2.9865
11583	22.2243	11583	124.096	11583	0.626378	11583	10.6723	11583	37.4304	11583	2.47324
11584	19.7913	11584	120.57	11584	1.20243	11584	10.4073	11584	76.4497	11584	2.26236
11585	17.168	11585	114.65	11585	2.60924	11585	11.158	11585	173.366	11585	2.21179
11586	14.9526	11586	105.91	11586	4.76748	11586	12.742	11586	248.214	11586	2.18185
11587	13.5348	11587	95.5129	11587	6.49473	11587	14.6948	11587	498.725	11587	2.05008
11588	13.1159	11588	85.5995	11588	6.60364	11588	16.2381	11588	211.885	11588	1.77226
11589	13.8477	11589	78.0788	11589	5.58554	11589	16.6196	11589	144.17	11589	1.41316
11590	15.9759	11590	73.7779	11590	4.63538	11590	15.6514	11590	128.609	11590	1.08475
11591	19.9424	11591	72.1463	11591	4.00458	11591	13.84	11591	85.6139	11591	0.863037
11592	26.41	11592	71.1716	11592	3.37275	11592	11.9571	11592	98.1354	11592	0.772952
11593	36.0769	11593	67.7482	11593	2.66558	11593	10.5775	11593	61.0505	11593	0.82717
11594	49.0284	11594	59.3872	11594	2.00513	11594	9.96567	11594	47.7771	11594	1.06739
11595	63.5663	11595	46.6543	11595	1.44357	11595	10.1918	11595	34.9874	11595	1.58248
11596	75.4621	11596	33.201	11596	0.991162	11596	11.231	11596	44.7003	11596	2.46872
11597	79.5406	11597	22.6134	11597	0.677623	11597	12.9477	11597	57.068	11597	3.67715
11598	73.5506	11598	16.0871	11598	0.462665	11598	15.0137	11598	73.7724	11598	4.82547
11599	60.2702	11599	13.0597	11599	0.276491	11599	16.9047	11599	85.2381	11599	5.30768
11600	45.0379	11600	12.7124	11600	0.136082	11600	18.0835	11600	63.5428	11600	4.81333
11601	31.8771	11601	14.5971	11601	0.0669432	11601	18.2645	11601	50.6238	11601	3.64802
11602	22.1519	11602	18.3178	11602	0.0386395	11602	17.5223	11602	31.9298	11602	2.39985
11603	15.5004	11603	22.7048	11603	0.0225209	11603	16.1712	11603	23.8078	11603	1.44777
11604	11.0507	11604	25.5652	11604	0.012894	11604	14.57	11604	29.2354	11604	0.852961
11605	8.0416	11605	25.188	11605	0.00814909	11605	13.0033	11605	15.6746	11605	0.521055
11606	5.97105	11606	22.0984	11606	0.00526162	11606	11.6584	11606	17.3459	11606	0.345835
11607	4.54876	11607	18.3969	11607	0.00292451	11607	10.6474	11607	26.2861	11607	0.256611
11608	3.60833	11608	15.8507	11608	0.00150848	11608	10.0329	11608	26.2917	11608	0.215448
11609	3.04299	11609	15.2973	11609	0.00115886	11609	9.84634	11609	51.0348	11609	0.204936
11610	2.77688	11610	17.2437	11610	0.00139639	11610	10.0997	11610	88.1088	11610	0.21967
11611	2.75603	11611	22.4658	11611	0.00175556	11611	10.7913	11611	227.826	11611	0.261981
11612	2.93876	11612	31.9761	11612	0.00239422	11612	11.9012	11612	338.622	11612	0.339244
11613	3.27701	11613	45.9843	11613	0.00391936	11613	13.3723	11613	746.576	11613	0.458679
11614	3.69654	11614	62.1841	11614	0.00649043	11614	15.0814	11614	925.411	11614	0.615631
11615	4.09847	11615	75.5693	11615	0.00909701	11615	16.8208	11615	1375.97	11615	0.779555
11616	4.39807	11616	81.6265	11616	0.0094031	11616	18.3332	11616	1327.21	11616	0.898311
11617	4.57751	11617	79.9676	11617	0.00652942	11617	19.4205	11617	1423.18	11617	0.934385
11618	4.70156	11618	73.9782	11618	0.00321026	11618	20.0605	11618	766.271	11618	0.898838
11619	4.87968	11619	67.5777	11619	0.00210418	11619	20.4177	11619	491.642	11619	0.838994
11620	5.20821	11620	63.0168	11620	0.00386055	11620	20.708	11620	294.262	11620	0.799185
11621	5.72005	11621	60.6976	11621	0.00860079	11621	20.9954	11621	163.206	11621	0.797884
11622	6.34054	11622	59.7833	11622	0.0137631	11622	21.0234	11622	92.9433	11622	0.823833
11623	6.8659	11623	58.8402	11623	0.0149447	11623	20.1955	11623	67.5587	11623	0.837576
11624	7.02834	11624	56.5532	11624	0.013108	11624	17.8702	11624	26.0525	11624	0.788373
11625	6.66832	11625	52.4522	11625	0.0136968	11625	13.9851	11625	11.7724	11625	0.657299
11626	5.87495	11626	47.1621	11626	0.0170051	11626	9.43944	11626	10.2853	11626	0.484203
11627	4.92749	11627	41.9362	11627	0.0177827	11627	5.53596	11627	4.5604	11627	0.331529
11628	4.10267	11628	37.9465	11628	0.0146773	11628	2.97738	11628	1.17253	11628	0.232764
11629	3.55226	11629	35.9105	11629	0.0111917	11629	1.62811	11629	0.500498	11629	0.188962
11630	3.31428	11630	36.1022	11630	0.009116	11630	1.03369	11630	0.290242	11630	0.195912
11631	3.37323	11631	38.427	11631	0.00779516	11631	0.855502	11631	0.287214	11631	0.268984
11632	3.69409	11632	42.3178	11632	0.00650256	11632	0.963674	11632	0.487229	11632	0.467606
11633	4.22312	11633	46.5376	11633	0.00536746	11633	1.39882	11633	0.432958	11633	0.923339
11634	4.89114	11634	49.3332	11634	0.00491061	11634	2.31011	11634	0.486735	11634	1.81497
11635	5.65578	11635	49.2781	11635	0.00500292	11635	3.79116	11635	0.513178	11635	3.16436
11636	6.56977	11636	46.2548	11636	0.00503666	11636	5.60606	11636	0.369964	11636	4.54166
11637	7.82325	11637	41.4985	11637	0.00453033	11637	7.15292	11637	0.19697	11637	5.22708
11638	9.7408	11638	36.6566	11638	0.00356831	11638	7.89614	11638	0.0936767	11638	4.91306
11639	12.7476	11639	32.9037	11639	0.0027327	11639	7.75512	11639	0.0695019	11639	3.97392
11640	17.2686	11640	30.7347	11640	0.00229469	11640	6.99833	11640	0.0517679	11640	2.97052
11641	23.4592	11641	30.1732	11641	0.00200222	11641	5.93661	11641	0.0425495	11641	2.20434
11642	30.7368	11642	30.972	11642	0.0016795	11642	4.7806	11642	0.0227615	11642	1.71035
11643	37.3911	11643	32.6578	11643	0.00158182	11643	3.66056	11643	0.023765	11643	1.41012
11644	40.9089	11644	34.5246	11644	0.00232706	11644	2.67313	11644	0.0476635	11644	1.20462
11645	39.3941	11645	35.7947	11645	0.00420814	11645	1.88924	11645	0.0651113	11645	1.00722
11646	33.1812	11646	36.0387	11646	0.0057923	11646	1.33764	11646	0.128464	11646	0.771242
11647	24.8068	11647	35.5606	11647	0.00547644	11647	1.00323	11647	0.0997481	11647	0.514169
11648	17.1005	11648	35.3211	11648	0.00477195	11648	0.852311	11648	0.0893844	11648	0.293591
11649	11.5015	11649	36.4534	11649	0.00693635	11649	0.867118	11649	0.0659872	11649	0.146745
11650	8.01866	11650	39.772	11650	0.0142367	11650	1.07389	11650	0.083614	11650	0.0674667
11651	6.05733	11651	45.3129	11651	0.0261116	11651	1.55581	11651	0.214121	11651	0.0302321
11652	5.01118	11652	51.7076	11652	0.0393949	11652	2.40986	11652	0.481317	11652	0.0138534
11653	4.41743	11653	55.966	11653	0.0543464	11653	3.56141	11653	1.23173	11653	0.0066928
11654	3.93304	11654	55.0379	11654	0.0762974	11654	4.51933	11654	1.68105	11654	0.00347151
11655	3.34038	11655	48.591	11655	0.108319	11655	4.58252	11655	1.89669	11655	0.0019658
11656	2.60208	11656	39.5102	11656	0.140152	11656	3.6201	11656	1.01632	11656	0.00124207
11657	1.84186	11657	31.2431	11657	0.147519	11657	2.28211	11657	0.538561	11657	0.000897325
11658	1.21032	11658	25.5751	11658	0.117838	11658	1.2281	11658	0.271838	11658	0.000755436
11659	0.771747	11659	22.6946	11659	0.070765	11659	0.621809	11659	0.313855	11659	0.000746743
11660	0.504302	11660	22.126	11660	0.0364283	11660	0.329744	11660	0.154618	11660	0.00086384
11661	0.355521	11661	23.2499	11661	0.0232928	11661	0.201505	11661	0.355079	11661	0.00115798
11662	0.280347	11662	25.3624	11662	0.0213477	11662	0.151729	11662	0.252646	11662	0.001772
11663	0.250326	11663	27.6595	11663	0.0218462	11663	0.145056	11663	0.119462	11663	0.00301845
11664	0.249212	11664	29.3729	11664	0.0212375	11664	0.174579	11664	0.0866212	11664	0.00548181
11665	0.265575	11665	29.9789	11665	0.0184199	11665	0.253029	11665	0.113043	11665	0.00995919
11666	0.286192	11666	29.2974	11666	0.015732	11666	0.410174	11666	0.236465	11666	0.0167674
11667	0.294062	11667	27.4684	11667	0.0180055	11667	0.678433	11667	0.500633	11667	0.0243102
11668	0.275395	11668	24.9009	11668	0.0303317	11668	1.04286	11668	1.00467	11668	0.028785
11669	0.230828	11669	22.1954	11669	0.0546491	11669	1.37848	11669	1.43216	11669	0.0272693
11670	0.17588	11670	19.9997	11670	0.0825515	11670	1.49346	11670	1.11505	11670	0.0210026
11671	0.127749	11671	18.8691	11671	0.0962726	11671	1.31267	11671	2.27499	11671	0.0138083
11672	0.094537	11672	19.2528	11672	0.0857536	11672	0.96328	11672	2.30722	11672	0.00832377
11673	0.0759683	11673	21.6031	11673	0.0604616	11673	0.627702	11673	1.10076	11673	0.00498906
11674	0.0688363	11674	26.4598	11674	0.0373193	11674	0.39404	11674	0.559163	11674	0.0032152
11675	0.0702514	11675	34.3162	11675	0.0233748	11675	0.258876	11675	0.47065	11675	0.00238097
11676	0.0779752	11676	45.1326	11676	0.0152703	11676	0.190014	11676	0.530642	11676	0.00212815
11677	0.089551	11677	57.6754	11677	0.00905669	11677	0.161442	11677	0.941815	11677	0.00235833
11678	0.101837	11678	69.3241	11678	0.00444814	11678	0.159485	11678	0.761934	11678	0.00323475
11679	0.111796	11679	76.9287	11679	0.00190251	11679	0.180017	11679	0.673222	11679	0.0053051
11680	0.117932	11680	78.3466	11680	0.00093512	11680	0.225997	11680	1.35362	11680	0.00975119
11681	0.120893	11681	73.4953	11681	0.000901316	11681	0.306815	11681	2.75237	11681	0.0184952
11682	0.122782	11682	64.1787	11682	0.00127062	11682	0.437869	11682	3.61089	11682	0.0333105
11683	0.125931	11683	52.9837	11683	0.00165619	11683	0.635828	11683	4.50614	11683	0.0531796
11684	0.131936	11684	42.1155	11684	0.00215204	11684	0.901979	11684	8.38165	11684	0.0718335
11685	0.141091	11685	32.8279	11685	0.00325265	11685	1.19255	11685	8.01258	11685	0.0801919
11686	0.152199	11686	25.5027	11686	0.00459665	11686	1.40568	11686	27.4647	11686	0.0737448
11687	0.163045	11687	20.0248	11687	0.00486682	11687	1.43623	11687	30.7723	11687	0.0566347
11688	0.171694	11688	16.1156	11688	0.00381833	11688	1.27302	11688	24.9407	11688	0.037379
11689	0.177784	11689	13.5071	11689	0.00244768	11689	1.01268	11689	14.6875	11689	0.0221067
11690	0.182472	11690	11.9932	11690	0.00139993	11690	0.766105	11690	6.10418	11690	0.0123284
11691	0.186928	11691	11.4288	11691	0.000756065	11691	0.585115	11691	4.92116	11691	0.0068296
11692	0.190692	11692	11.7084	11692	0.000509603	11692	0.467532	11692	2.46821	11692	0.00391929
11693	0.191263	11693	12.711	11693	0.000673121	11693	0.389668	11693	1.63965	11693	0.00238091
11694	0.185506	11694	14.2037	11694	0.00101427	11694	0.327245	11694	3.5334	11694	0.00152751
11695	0.172213	11695	15.75	11695	0.00108843	11695	0.265722	11695	1.83469	11695	0.00101407
11696	0.15363	11696	16.7524	11696	0.00100809	11696	0.204537	11696	0.546626	11696	0.000679621
11697	0.134354	11697	16.7108	11697	0.00165668	11697	0.152061	11697	0.370601	11697	0.000453914
11698	0.118808	11698	15.5378	11698	0.00453343	11698	0.115353	11698	0.194545	11698	0.000305385
11699	0.109723	11699	13.6222	11699	0.0139569	11699	0.0957333	11699	0.0645064	11699	0.000214747
11700	0.108239	11700	11.5761	11700	0.0412079	11700	0.0916069	11700	0.0465535	11700	0.000166645
11701	0.114527	11701	9.93467	11701	0.0985113	11701	0.102076	11701	0.0886539	11701	0.000150518
11702	0.127855	11702	9.05582	11702	0.178039	11702	0.127687	11702	0.127632	11702	0.000163307
11703	0.145945	11703	9.24062	11703	0.247471	11703	0.168071	11703	0.307942	11703	0.000212114
11704	0.164654	11704	11.0138	11704	0.285075	11704	0.21791	11704	0.665959	11704	0.000317859
11705	0.179539	11705	15.6171	11705	0.298383	11705	0.265258	11705	0.627193	11705	0.000519178
11706	0.189193	11706	25.9343	11706	0.296412	11706	0.295779	11706	1.20035	11706	0.000870452
11707	0.197554	11707	47.9486	11707	0.289729	11707	0.299863	11707	3.12532	11707	0.00142229
11708	0.213516	11708	91.3729	11708	0.324743	11708	0.276297	11708	4.57975	11708	0.00217617
11709	0.250345	11709	164.283	11709	0.45621	11709	0.231475	11709	6.62894	11709	0.0030304
11710	0.328679	11710	256.759	11710	0.630066	11710	0.176744	11710	13.7391	11710	0.00377556
11711	0.484203	11711	328.785	11711	0.688471	11711	0.124473	11711	14.6731	11711	0.00419099
11712	0.776154	11712	336.397	11712	0.591305	11712	0.0833191	11712	10.8885	11712	0.00418633
11713	1.28096	11713	278.804	11713	0.511915	11713	0.0557915	11713	6.01641	11713	0.00384484
11714	2.039	11714	196.651	11714	0.759104	11714	0.0398877	11714	4.21868	11714	0.00333188
11715	2.94448	11715	127.005	11715	1.8295	11715	0.0324028	11715	4.8547	11715	0.00278561
11716	3.68413	11716	81.1551	11716	4.34275	11716	0.031106	11716	2.57217	11716	0.00228284
11717	3.90376	11717	54.4871	11717	8.41024	11717	0.0354038	11717	2.1518	11717	0.00186247
11718	3.52321	11718	39.5319	11718	12.8574	11718	0.0462862	11718	4.01805	11718	0.00155244
11719	2.80708	11719	30.8399	11719	15.7217	11719	0.0658701	11719	6.6412	11719	0.00137973
11720	2.09728	11720	25.1838	11720	15.8941	11720	0.0960659	11720	5.97222	11720	0.00137758
11721	1.57506	11721	20.8147	11721	13.5268	11721	0.13575	11721	4.42648	11721	0.00160837
11722	1.25626	11722	16.9182	11722	9.52572	11722	0.177294	11722	8.4186	11722	0.00220229
11723	1.08489	11723	13.2788	11723	5.40036	11723	0.206478	11723	7.63769	11723	0.00338154
11724	0.991937	11724	10.0075	11724	2.44777	11724	0.210391	11724	6.48711	11724	0.00537417
11725	0.914386	11725	7.29682	11725	0.922783	11725	0.189072	11725	11.972	11725	0.00810059
11726	0.810557	11726	5.25419	11726	0.33304	11726	0.156945	11726	8.80534	11726	0.010827
11727	0.677565	11727	3.85461	11727	0.139291	11727	0.131389	11727	5.21132	11727	0.0124305
11728	0.545131	11728	2.98574	11728	0.0726924	11728	0.124307	11728	2.6233	11728	0.0123214
11729	0.445584	11729	2.51709	11729	0.05293	11729	0.146991	11729	1.8175	11729	0.0108961
11730	0.394785	11730	2.34337	11730	0.060919	11730	0.226019	11730	3.35383	11730	0.00900299
11731	0.396339	11731	2.39248	11731	0.0905427	11731	0.431073	11731	2.73489	11731	0.00727258
11732	0.450927	11732	2.61013	11732	0.130681	11732	0.906874	11732	3.80139	11732	0.00594648
11733	0.554738	11733	2.93724	11733	0.157734	11733	1.82676	11733	5.59525	11733	0.00502745
11734	0.684897	11734	3.29865	11734	0.151671	11734	3.12162	11734	11.558	11734	0.00444417
11735	0.78919	11735	3.61894	11735	0.116871	11735	4.19732	11735	7.6011	11735	0.00413723
11736	0.810886	11736	3.86085	11736	0.0737932	11736	4.34372	11736	7.37	11736	0.0040891
11737	0.738263	11737	4.05349	11737	0.0392016	11737	3.55734	11737	13.3935	11737	0.00433081
11738	0.613721	11738	4.27957	11738	0.018923	11738	2.46723	11738	5.16441	11738	0.00493852
11739	0.489588	11739	4.62535	11739	0.00931196	11739	1.58647	11739	3.75117	11739	0.0060078
11740	0.392061	11740	5.11035	11740	0.00470689	11740	1.03321	11740	6.31965	11740	0.00756044
11741	0.321589	11741	5.60488	11741	0.00239413	11741	0.723588	11741	3.13804	11741	0.00933932
11742	0.267931	11742	5.79436	11742	0.00125391	11742	0.553604	11742	3.79573	11742	0.0106185
11743	0.221871	11743	5.3441	11743	0.00063916	11743	0.452072	11743	6.95643	11743	0.010464
11744	0.180581	11744	4.2501	11744	0.000335061	11744	0.37889	11744	3.89251	11744	0.00859565
11745	0.146746	11745	2.93176	11745	0.000283343	11745	0.317055	11745	4.30679	11745	0.00585146
11746	0.124031	11746	1.84716	11746	0.000449963	11746	0.265058	11746	4.09993	11746	0.00340613
11747	0.114079	11747	1.15899	11747	0.00090047	11747	0.227599	11747	2.52093	11747	0.00180519
11748	0.116579	11748	0.79589	11748	0.00187301	11748	0.208686	11748	3.01973	11748	0.000942205
11749	0.129414	11749	0.640815	11749	0.00382841	11749	0.210276	11749	3.50391	11749	0.000520564
11750	0.146715	11750	0.617365	11750	0.0073616	11750	0.233589	11750	6.24958	11750	0.00031866
11751	0.15731	11751	0.692099	11751	0.0130365	11751	0.279095	11751	6.74815	11751	0.000218495
11752	0.149884	11752	0.854681	11752	0.0208109	11752	0.343759	11752	10.5646	11752	0.00016511
11753	0.123551	11753	1.10072	11753	0.0283115	11753	0.417617	11753	8.7588	11753	0.000133989
11754	0.0895834	11754	1.42484	11754	0.0330081	11754	0.484527	11754	8.43675	11754	0.000114508
11755	0.0603496	11755	1.8232	11755	0.0359634	11755	0.529236	11755	9.87494	11755	0.000102353
11756	0.0407986	11756	2.29191	11756	0.0365991	11756	0.544858	11756	5.58645	11756	9.57692e-05
11757	0.0298842	11757	2.80499	11757	0.0334163	11757	0.533592	11757	4.13664	11757	9.3541e-05
11758	0.0250548	11758	3.27855	11758	0.0304337	11758	0.502354	11758	2.61783	11758	9.39381e-05
11759	0.0245945	11759	3.56667	11759	0.0282015	11759	0.459845	11759	1.53298	11759	9.44275e-05
11760	0.0281329	11760	3.54089	11760	0.0225953	11760	0.416786	11760	0.842967	11760	9.23642e-05
11761	0.0367894	11761	3.20713	11761	0.0151009	11761	0.386055	11761	0.623675	11761	8.64378e-05
11762	0.0536914	11762	2.71518	11762	0.00876542	11762	0.381474	11762	0.269805	11762	7.7455e-05
11763	0.0848706	11763	2.23631	11763	0.00402293	11763	0.41791	11763	0.194506	11763	6.73877e-05
11764	0.139255	11764	1.85724	11764	0.00131799	11764	0.513128	11764	0.292689	11764	5.77124e-05
11765	0.223962	11765	1.57339	11765	0.000361088	11765	0.684127	11765	0.507646	11765	4.8684e-05
11766	0.331342	11766	1.33377	11766	0.000116836	11766	0.924959	11766	2.09872	11766	3.98263e-05
11767	0.427515	11767	1.08914	11767	4.95075e-05	11767	1.16975	11767	2.68987	11767	3.09146e-05
11768	0.467892	11768	0.82832	11768	3.35204e-05	11768	1.29667	11768	1.2678	11768	2.25264e-05
11769	0.436782	11769	0.581236	11769	4.24506e-05	11769	1.22247	11769	0.545836	11769	1.56394e-05
11770	0.360941	11770	0.384805	11770	7.15147e-05	11770	0.990271	11770	0.459985	11770	1.08264e-05
11771	0.28039	11771	0.251909	11771	0.000144519	11771	0.721206	11771	0.332691	11771	8.00557e-06
11772	0.219876	11772	0.172324	11772	0.000347216	11772	0.505955	11772	0.321845	11772	6.81586e-06
11773	0.186685	11773	0.129009	11773	0.00089042	11773	0.369542	11773	0.194001	11773	7.07989e-06
11774	0.181703	11774	0.108522	11774	0.0022802	11774	0.301174	11774	0.402717	11774	9.14406e-06
11775	0.209621	11775	0.103091	11775	0.00564109	11775	0.286179	11775	0.2486	11775	1.42316e-05
11776	0.287151	11776	0.10937	11776	0.0127173	11776	0.319345	11776	0.279837	11776	2.47522e-05
11777	0.452598	11777	0.126919	11777	0.0237118	11777	0.406662	11777	0.502554	11777	4.36212e-05
11778	0.774047	11778	0.15681	11778	0.0343766	11778	0.561316	11778	0.572519	11778	7.09242e-05
11779	1.33466	11779	0.199563	11779	0.0391447	11779	0.793865	11779	0.639871	11779	9.92636e-05
11780	2.15508	11780	0.251489	11780	0.0365481	11780	1.09716	11780	0.414325	11780	0.000115342
11781	3.06454	11781	0.300539	11781	0.0284606	11781	1.43304	11781	0.440831	11781	0.000110786
11782	3.68775	11782	0.327011	11782	0.0183469	11782	1.7317	11782	0.602556	11782	8.97159e-05
11783	3.70682	11783	0.314561	11783	0.0101552	11783	1.91021	11783	0.404772	11783	6.33833e-05
11784	3.16028	11784	0.264594	11784	0.00539013	11784	1.90646	11784	0.200755	11784	4.06222e-05
11785	2.38006	11785	0.196774	11785	0.00303326	11785	1.7124	11785	0.119458	11785	2.44894e-05
11786	1.67819	11786	0.133521	11786	0.00186908	11786	1.38339	11786	0.0609349	11786	1.42933e-05
11787	1.18037	11787	0.0866328	11787	0.00123438	11787	1.0122	11787	0.048624	11787	8.25448e-06
11788	0.874837	11788	0.0568229	11788	0.000777135	11788	0.683544	11788	0.0295438	11788	4.82139e-06
11789	0.707797	11789	0.0399097	11789	0.000418961	11789	0.441486	11789	0.0100609	11789	2.94905e-06
11790	0.632199	11790	0.0316156	11790	0.000198966	11790	0.287993	11790	0.00432271	11790	2.00491e-06
11791	0.616561	11791	0.0292853	11791	8.59657e-05	11791	0.203074	11791	0.00432405	11791	1.64857e-06
11792	0.638342	11792	0.0319698	11792	2.9898e-05	11792	0.165139	11792	0.00496059	11792	1.79042e-06
11793	0.67446	11793	0.0399348	11793	8.38164e-06	11793	0.160685	11793	0.00285837	11793	2.70642e-06
11794	0.695538	11794	0.0534542	11794	3.2762e-06	11794	0.185012	11794	0.00439195	11794	5.59347e-06
11795	0.671196	11795	0.070282	11795	2.76568e-06	11795	0.237538	11795	0.00717846	11795	1.44104e-05
11796	0.588177	11796	0.0833953	11796	3.43446e-06	11796	0.312369	11796	0.0110923	11796	4.03528e-05
11797	0.464617	11797	0.0842595	11797	4.41984e-06	11797	0.389177	11797	0.0148081	11797	0.000107072
11798	0.338682	11798	0.0715313	11798	5.51369e-06	11798	0.439411	11798	0.0164737	11798	0.000243151
11799	0.240761	11799	0.0530988	11799	6.49629e-06	11799	0.450125	11799	0.0156868	11799	0.000449695
11800	0.180054	11800	0.0376313	11800	6.76318e-06	11800	0.436643	11800	0.0138441	11800	0.000678612
11801	0.152193	11801	0.0285221	11801	6.36928e-06	11801	0.428223	11801	0.0125523	11801	0.000870108
11802	0.150902	11802	0.0255708	11802	6.17158e-06	11802	0.449922	11802	0.0127259	11802	0.00100534
11803	0.172504	11803	0.0284389	11803	6.63381e-06	11803	0.516982	11803	0.0148575	11803	0.0011062
11804	0.212693	11804	0.0382759	11804	8.06386e-06	11804	0.630337	11804	0.0192558	11804	0.00120195
11805	0.258835	11805	0.0574427	11805	1.12592e-05	11805	0.761491	11805	0.0255347	11805	0.00131
11806	0.287428	11806	0.0870211	11806	1.5522e-05	11806	0.845712	11806	0.0317299	11806	0.00144284
11807	0.277877	11807	0.123196	11807	1.77217e-05	11807	0.824913	11807	0.0347837	11807	0.00163386
11808	0.231448	11808	0.158058	11808	1.68974e-05	11808	0.713008	11808	0.0331175	11808	0.00197526
11809	0.169209	11809	0.187424	11809	1.622e-05	11809	0.585444	11809	0.0281546	11809	0.00268403
11810	0.112374	11810	0.217424	11810	1.70025e-05	11810	0.509525	11810	0.0225909	11810	0.00427159
11811	0.07037	11811	0.264442	11811	1.57161e-05	11811	0.521039	11811	0.0181753	11811	0.00797888
11812	0.0429567	11812	0.355941	11812	1.06007e-05	11812	0.654544	11812	0.0153506	11812	0.0166087
11813	0.0263219	11813	0.54094	11813	5.37938e-06	11813	0.971575	11813	0.0139472	11813	0.0350136
11814	0.0166842	11814	0.9128	11814	3.26575e-06	11814	1.53557	11814	0.0137941	11814	0.0669753
11815	0.0113275	11815	1.63973	11815	4.90506e-06	11815	2.29091	11815	0.0150823	11815	0.106098
11816	0.008556	11816	2.97901	11816	1.81959e-05	11816	2.96277	11816	0.0187601	11816	0.132421
11817	0.00742382	11817	5.21886	11817	9.56232e-05	11817	3.26042	11817	0.0274483	11817	0.130216
11818	0.00750312	11818	8.49602	11818	0.000421897	11818	3.20799	11818	0.0479223	11818	0.105566
11819	0.00872586	11819	12.5687	11819	0.00142043	11819	3.09112	11819	0.0971053	11819	0.0761312
11820	0.0112596	11820	16.8272	11820	0.00418838	11820	3.19243	11820	0.212294	11820	0.0531923
11821	0.0153443	11821	20.7336	11821	0.0103917	11821	3.7238	11821	0.454537	11821	0.0386918
11822	0.0210398	11822	24.3689	11822	0.0176179	11822	4.90867	11822	0.872298	11822	0.0305489
11823	0.0279346	11823	28.5826	11823	0.018962	11823	7.02751	11823	1.41928	11823	0.0263538
11824	0.0349486	11824	34.7546	11824	0.0140961	11824	10.345	11824	1.92981	11824	0.0243046
11825	0.0403566	11825	44.4416	11825	0.00986945	11825	14.9667	11825	2.23639	11825	0.0230839
11826	0.0422107	11826	58.6849	11826	0.00839247	11826	20.7778	11826	2.29368	11826	0.0216895
11827	0.0393135	11827	76.3916	11827	0.00670819	11827	27.4593	11827	2.16269	11827	0.0194818
11828	0.0322635	11828	92.416	11828	0.00428846	11828	34.2849	11828	1.92248	11828	0.0163219
11829	0.0233829	11829	98.7003	11829	0.00314631	11829	39.5898	11829	1.62239	11829	0.0125649
11830	0.0152388	11830	90.5568	11830	0.00367875	11830	40.7055	11830	1.28934	11830	0.00882855
11831	0.00921856	11831	71.7812	11831	0.00423513	11831	35.702	11831	0.952653	11831	0.00567798
11832	0.00538281	11832	51.0959	11832	0.00353261	11832	26.0216	11832	0.651927	11832	0.00340247
11833	0.00315458	11833	34.7858	11833	0.00196355	11833	15.9454	11833	0.420252	11833	0.00197751
11834	0.00191983	11834	24.2927	11834	0.000686331	11834	8.71085	11834	0.265851	11834	0.0011897
11835	0.00124805	11835	18.38	11835	0.000144657	11835	4.66524	11835	0.174426	11835	0.000802642
11836	0.000887726	11836	15.3767	11836	2.78477e-05	11836	2.71156	11836	0.12464	11836	0.000651476
11837	0.000705214	11837	13.9479	11837	2.96633e-05	11837	1.83727	11837	0.0989803	11837	0.000656132
11838	0.000634276	11838	13.0636	11838	6.41811e-05	11838	1.47687	11838	0.0857273	11838	0.000800177
11839	0.000645422	11839	11.9268	11839	0.000103912	11839	1.36208	11839	0.0770606	11839	0.00110125
11840	0.000727249	11840	10.1395	11840	0.000143966	11840	1.36118	11840	0.0677806	11840	0.00156644
11841	0.000871039	11841	7.86417	11841	0.000200793	11841	1.40541	11841	0.0557532	11841	0.00213769
11842	0.00105653	11842	5.61852	11842	0.000236494	11842	1.47318	11842	0.0421951	11842	0.00268659
11843	0.00124894	11843	3.83429	11843	0.000193259	11843	1.58688	11843	0.0298984	11843	0.00310347
11844	0.0014184	11844	2.63437	11844	0.000109048	11844	1.79955	11844	0.020751	11844	0.00339806
11845	0.00156798	11845	1.9216	11845	6.47444e-05	11845	2.17436	11845	0.0149404	11845	0.00370532
11846	0.00174042	11846	1.54229	11846	0.000112361	11846	2.74944	11846	0.0117054	11846	0.00423149
11847	0.00200149	11847	1.36778	11847	0.000411178	11847	3.45911	11847	0.0101572	11847	0.00523318
11848	0.00242026	11848	1.29986	11848	0.00197359	11848	4.03638	11848	0.00955491	11848	0.00703611
11849	0.00304994	11849	1.25336	11849	0.00876934	11849	4.07807	11849	0.00925527	11849	0.00999763
11850	0.00389619	11850	1.1578	11850	0.0244011	11850	3.40488	11850	0.00870349	11850	0.0142523
11851	0.00487562	11851	0.986345	11851	0.0395431	11851	2.32539	11851	0.00762183	11851	0.0191907
11852	0.00580145	11852	0.770482	11852	0.0422439	11852	1.34035	11852	0.00616043	11852	0.023134
11853	0.00643691	11853	0.566072	11853	0.0443748	11853	0.697685	11853	0.00471074	11853	0.0240611
11854	0.00660563	11854	0.408092	11854	0.0661313	11854	0.358533	11854	0.00356888	11854	0.02123
11855	0.00629085	11855	0.300481	11855	0.105576	11855	0.198989	11855	0.00281403	11855	0.0159311
11856	0.00565271	11856	0.231596	11856	0.147338	11856	0.128139	11856	0.0023981	11856	0.0103782
11857	0.00494862	11857	0.188549	11857	0.176369	11857	0.100041	11857	0.00225659	11857	0.00610003
11858	0.00442061	11858	0.16261	11858	0.180039	11858	0.0961596	11858	0.00236324	11858	0.00342406
11859	0.00424054	11859	0.149337	11859	0.16567	11859	0.112345	11859	0.00274631	11859	0.00196994
11860	0.00453918	11860	0.147079	11860	0.156409	11860	0.152744	11860	0.00348594	11860	0.00124786
11861	0.00546437	11861	0.155452	11861	0.156838	11861	0.224457	11861	0.00468112	11861	0.000917268
11862	0.00717993	11862	0.173988	11862	0.149314	11862	0.324866	11862	0.0063553	11862	0.000795497
11863	0.00971648	11863	0.200773	11863	0.129703	11863	0.423324	11863	0.00832141	11863	0.000796915
11864	0.0126909	11864	0.231664	11864	0.120985	11864	0.46628	11864	0.0101695	11864	0.000883268
11865	0.0152179	11865	0.261572	11865	0.136454	11865	0.425005	11865	0.0115354	11865	0.00103856
11866	0.0164035	11866	0.288059	11866	0.162294	11866	0.327824	11866	0.0124543	11866	0.0012645
11867	0.0160676	11867	0.314515	11867	0.183323	11867	0.226118	11867	0.0134287	11867	0.00158867
11868	0.0148223	11868	0.350295	11868	0.190243	11868	0.149378	11868	0.0152644	11868	0.00207414
11869	0.0134856	11869	0.408617	11869	0.174707	11869	0.100546	11869	0.0190477	11869	0.00281729
11870	0.0125836	11870	0.503821	11870	0.138727	11870	0.0719216	11870	0.0264243	11870	0.00390858
11871	0.0122591	11871	0.645492	11871	0.0955825	11871	0.0558161	11871	0.0400331	11871	0.00531249
11872	0.012358	11872	0.823967	11872	0.0693693	11872	0.0472495	11872	0.0636568	11872	0.00668166
11873	0.0125034	11873	0.990681	11873	0.110628	11873	0.0434322	11873	0.10127	11873	0.00734453
11874	0.0122121	11874	1.06196	11874	0.341911	11874	0.0427039	11874	0.154278	11874	0.00677344
11875	0.0111438	11875	0.976008	11875	1.04306	11875	0.0435891	11875	0.217986	11875	0.00517914
11876	0.00935448	11876	0.758765	11876	2.85106	11876	0.0441471	11876	0.280936	11876	0.00336318
11877	0.00726836	11877	0.506906	11877	6.70242	11877	0.042132	11877	0.330049	11877	0.00197157
11878	0.00536769	11878	0.303866	11878	12.0395	11878	0.0363702	11878	0.358831	11878	0.00114491
11879	0.00392561	11879	0.174425	11879	15.554	11879	0.0280741	11879	0.371714	11879	0.000736499
11880	0.0029809	11880	0.10371	11880	14.6996	11880	0.0199597	11880	0.381408	11880	0.000585432
11881	0.00245479	11881	0.0692374	11881	10.7039	11881	0.013991	11881	0.402902	11881	0.00062249
11882	0.00225675	11882	0.055483	11882	6.29112	11882	0.0105352	11882	0.448471	11882	0.000907006
11883	0.00232902	11883	0.0552369	11883	3.09759	11883	0.00913775	11883	0.522385	11883	0.00173651
11884	0.00264406	11884	0.0675705	11884	1.34567	11884	0.00935036	11884	0.610712	11884	0.00396327
11885	0.00317513	11885	0.0961281	11885	0.530949	11885	0.010963	11885	0.671417	11885	0.00951084
11886	0.00386097	11886	0.146579	11886	0.185729	11886	0.01383	11886	0.650582	11886	0.0211971
11887	0.00460102	11887	0.220213	11887	0.0582514	11887	0.017579	11887	0.533862	11887	0.0396187
11888	0.00530341	11888	0.304388	11888	0.0215289	11888	0.0215084	11888	0.370991	11888	0.0578244
11889	0.00594454	11889	0.369769	11889	0.0170202	11889	0.0248165	11889	0.227249	11889	0.0633095
11890	0.00657231	11890	0.38488	11890	0.0253948	11890	0.0268831	11890	0.131161	11890	0.0514275
11891	0.00724952	11891	0.339835	11891	0.0402025	11891	0.0273056	11891	0.0767227	11891	0.031567
11892	0.00799064	11892	0.255289	11892	0.0515164	11892	0.0258459	11892	0.048381	11892	0.0154164
11893	0.00873562	11893	0.166019	11893	0.0486294	11893	0.022577	11893	0.0343716	11893	0.00655621
11894	0.00937141	11894	0.0967474	11894	0.0334889	11894	0.0181032	11894	0.0283427	11894	0.00276
11895	0.00977926	11895	0.0531864	11895	0.0178689	11895	0.0134345	11895	0.027678	11895	0.00133388
11896	0.00986435	11896	0.0293532	11896	0.00881815	11896	0.00947326	11896	0.0322569	11896	0.000841255
11897	0.00955184	11897	0.0172948	11897	0.00616673	11897	0.00661648	11897	0.0442174	11897	0.000734727
11898	0.00878956	11898	0.0114129	11898	0.00776548	11898	0.00479671	11898	0.0681915	11898	0.000858019
11899	0.00759899	11899	0.00865537	11899	0.0105118	11899	0.00375517	11899	0.11023	11899	0.00120017
11900	0.00613627	11900	0.00756858	11900	0.0112471	11900	0.00324958	11900	0.172169	11900	0.00175931
11901	0.00466543	11901	0.00754057	11901	0.0102049	11901	0.00312944	11901	0.241861	11901	0.00242856
11902	0.00343016	11902	0.0084128	11902	0.0100032	11902	0.00334744	11902	0.29204	11902	0.00299084
11903	0.00254554	11903	0.0103396	11903	0.0122871	11903	0.00397581	11903	0.299988	11903	0.003282
11904	0.00200135	11904	0.0137755	11904	0.0175699	11904	0.00527516	11904	0.268746	11904	0.00331709
11905	0.00173359	11905	0.0194675	11905	0.0244053	11905	0.00787788	11905	0.221241	11905	0.00321702
11906	0.00168361	11906	0.0282284	11906	0.0287446	11906	0.013201	11906	0.178684	11906	0.00307224
11907	0.00181889	11907	0.0401689	11907	0.028037	11907	0.0242158	11907	0.150422	11907	0.00289081
11908	0.00212753	11908	0.0534836	11908	0.0246882	11908	0.0463554	11908	0.137316	11908	0.0026299
11909	0.00260114	11909	0.064187	11909	0.0241589	11909	0.0871514	11909	0.13741	11909	0.00226136
11910	0.00321414	11910	0.0684757	11910	0.0335891	11910	0.152134	11910	0.148676	11910	0.00181825
11911	0.00390648	11911	0.0660707	11911	0.0634187	11911	0.237853	11911	0.169538	11911	0.00138007
11912	0.00457913	11912	0.0604214	11912	0.125193	11912	0.33027	11912	0.198875	11912	0.00101785
11913	0.00511563	11913	0.0558032	11913	0.215906	11913	0.413975	11913	0.236084	11913	0.000760255
11914	0.00543424	11914	0.0552017	11914	0.302043	11914	0.482592	11914	0.280603	11914	0.000601545
11915	0.00554481	11915	0.0604066	11915	0.354178	11915	0.539074	11915	0.329991	11915	0.000525815
11916	0.00556385	11916	0.0726849	11916	0.367513	11916	0.588878	11916	0.376997	11916	0.00052645
11917	0.00567685	11917	0.0923805	11917	0.330563	11917	0.634707	11917	0.408431	11917	0.000622197
11918	0.0060914	11918	0.117014	11918	0.269154	11918	0.675998	11918	0.409848	11918	0.000888336
11919	0.00701872	11919	0.139497	11919	0.255383	11919	0.711369	11919	0.375637	11919	0.00154949
11920	0.00865494	11920	0.150045	11920	0.304815	11920	0.741454	11920	0.315492	11920	0.00327212
11921	0.0110692	11921	0.14267	11921	0.354305	11921	0.770575	11921	0.248847	11921	0.00806031
11922	0.0139212	11922	0.120132	11922	0.335207	11922	0.806699	11922	0.192541	11922	0.021673
11923	0.0161835	11923	0.0913372	11923	0.264962	11923	0.859352	11923	0.154073	11923	0.0583255
11924	0.0164645	11924	0.0645996	11924	0.287109	11924	0.935035	11924	0.133511	11924	0.14346
11925	0.0141879	11925	0.0438893	11925	0.713424	11925	1.03042	11925	0.128187	11925	0.298436
11926	0.0103699	11926	0.029496	11926	2.0164	11926	1.12677	11926	0.135493	11926	0.498709
11927	0.00670834	11927	0.020125	11927	4.03093	11927	1.19446	11927	0.153541	11927	0.656441
11928	0.00416839	11928	0.0142989	11928	5.40842	11928	1.21288	11928	0.181545	11928	0.688344
11929	0.0027617	11929	0.0108596	11929	5.283	11929	1.19022	11929	0.22129	11929	0.596019
11930	0.00214442	11930	0.0090202	11930	4.49983	11930	1.15869	11930	0.279004	11930	0.448419
11931	0.00204677	11931	0.00828859	11931	4.05052	11931	1.14853	11931	0.364928	11931	0.310099
11932	0.00235547	11932	0.00836801	11932	4.08066	11932	1.1639	11932	0.486686	11932	0.208125
11933	0.00303361	11933	0.00905536	11933	4.80301	11933	1.17138	11933	0.632756	11933	0.142333
11934	0.0039785	11934	0.0101516	11934	6.0554	11934	1.10995	11934	0.755175	11934	0.103282
11935	0.00491509	11935	0.0114215	11935	6.37781	11935	0.938622	11935	0.786528	11935	0.0817874
11936	0.0054892	11936	0.0126314	11936	5.01501	11936	0.689015	11936	0.701868	11936	0.0713819
11937	0.00552131	11937	0.0136284	11937	3.14439	11937	0.444844	11937	0.549047	11937	0.0678705
11938	0.00510866	11938	0.0143778	11938	1.83938	11938	0.266071	11938	0.39816	11938	0.068244
11939	0.004475	11939	0.0149331	11939	1.20418	11939	0.158735	11939	0.286414	11939	0.0698818
11940	0.0037969	11940	0.0153886	11940	1.08215	11940	0.101527	11940	0.216129	11940	0.0704621
11941	0.00315743	11941	0.0158675	11941	1.17033	11941	0.0733124	11941	0.176326	11941	0.0685077
11942	0.00258174	11942	0.0165312	11942	1.12035	11942	0.061204	11942	0.156153	11942	0.0638618
11943	0.00207608	11943	0.0175602	11943	0.885838	11943	0.058911	11943	0.147809	11943	0.0574313
11944	0.00164367	11944	0.0190659	11944	0.704066	11944	0.0637229	11944	0.145079	11944	0.0503917
11945	0.0012858	11945	0.0209295	11945	0.788126	11945	0.074052	11945	0.141314	11945	0.0435621
11946	0.00100111	11946	0.0226332	11946	1.14926	11946	0.0872547	11946	0.129444	11946	0.0372926
11947	0.0007865	11947	0.0232881	11947	1.52825	11947	0.0983053	11947	0.10583	11947	0.031689
11948	0.000638211	11948	0.0220934	11948	1.65859	11948	0.101343	11948	0.0746695	11948	0.0268662
11949	0.000552719	11949	0.0190123	11949	1.64248	11949	0.0940746	11949	0.045473	11949	0.0230565
11950	0.000529045	11950	0.0149253	11950	1.67849	11950	0.0800699	11950	0.0249012	11950	0.020592
11951	0.000573082	11951	0.0109992	11951	1.69137	11951	0.0655937	11951	0.013241	11951	0.0199167
11952	0.000701846	11952	0.00797825	11952	1.66932	11952	0.0552025	11952	0.00752952	11952	0.0218107
11953	0.000942209	11953	0.0060316	11953	2.19559	11953	0.0507021	11953	0.00501966	11953	0.0280299
11954	0.00131349	11954	0.00501649	11954	4.64744	11954	0.0525597	11954	0.00417393	11954	0.0427786
11955	0.00178617	11955	0.00475455	11955	10.28	11955	0.061085	11955	0.00439121	11955	0.075799
11956	0.00224169	11956	0.0051603	11956	19.0184	11956	0.0761417	11956	0.00563835	11956	0.147392
11957	0.00250111	11957	0.00625111	11957	30.6926	11957	0.0954673	11957	0.00821735	11957	0.29111
11958	0.00244526	11958	0.0080927	11958	41.7549	11958	0.113408	11958	0.0124853	11958	0.539126
11959	0.00211375	11959	0.010725	11959	42.645	11959	0.123168	11959	0.0183828	11959	0.87642
11960	0.00166402	11960	0.0141237	11960	31.3253	11960	0.121956	11960	0.0250745	11960	1.19922
11961	0.00124695	11961	0.0182081	11961	18.2363	11961	0.113004	11961	0.0312929	11961	1.36075
11962	0.000934544	11962	0.0227952	11962	10.9875	11962	0.102126	11962	0.0362365	11962	1.29308
11963	0.000731219	11963	0.0274118	11963	8.65841	11963	0.0936524	11963	0.0400557	11963	1.05963
11964	0.000613243	11964	0.0311208	11964	7.90264	11964	0.0893382	11964	0.0435648	11964	0.781428
11965	0.000555436	11965	0.0327895	11965	6.90124	11965	0.0892094	11965	0.0477594	11965	0.545789
11966	0.000541904	11966	0.0319423	11966	5.83738	11966	0.0925445	11966	0.0536834	11966	0.381934
11967	0.000571142	11967	0.0294147	11967	5.53799	11967	0.0985335	11967	0.0627758	11967	0.283857
11968	0.000663856	11968	0.0269439	11968	6.71095	11968	0.106867	11968	0.0777835	11968	0.236537
11969	0.00088245	11969	0.0262616	11969	9.17008	11969	0.118427	11969	0.104737	11969	0.229637
11970	0.00138379	11970	0.0288463	11970	10.8602	11970	0.135944	11970	0.157597	11970	0.261662
11971	0.00254664	11971	0.0364125	11971	10.2716	11971	0.164365	11971	0.269788	11971	0.338288
11972	0.00516908	11972	0.0512653	11972	8.88686	11972	0.210493	11972	0.52125	11972	0.461756
11973	0.0103307	11973	0.0752976	11973	8.67662	11973	0.2802	11973	1.08739	11973	0.606716
11974	0.0177511	11974	0.106751	11974	10.3539	11974	0.369908	11974	2.26478	11974	0.702557
11975	0.0232332	11975	0.13689	11975	14.2527	11975	0.4537	11975	4.27141	11975	0.673686
11976	0.0214494	11976	0.152664	11976	18.8356	11976	0.48499	11976	6.63107	11976	0.522871
11977	0.0137678	11977	0.146506	11977	19.8208	11977	0.433349	11977	7.88163	11977	0.335293
11978	0.0064879	11978	0.122755	11978	15.2398	11978	0.321854	11978	6.93034	11978	0.188496
11979	0.00252361	11979	0.0928253	11979	8.646	11979	0.205555	11979	4.55692	11979	0.10124
11980	0.000948328	11980	0.0661683	11980	4.07368	11980	0.120538	11980	2.36563	11980	0.0571325
11981	0.000403247	11981	0.0465226	11981	2.17292	11981	0.0703711	11981	1.05847	11981	0.036881
11982	0.000217507	11982	0.0335343	11982	1.92057	11982	0.0441614	11982	0.452899	11982	0.0288872
11983	0.00015544	11983	0.0254257	11983	2.44286	11983	0.0315147	11983	0.204817	11983	0.0281319
11984	0.000144141	11984	0.0204944	11984	3.14409	11984	0.0263097	11984	0.105998	11984	0.0337275
11985	0.000164255	11985	0.0175355	11985	3.5415	11985	0.0257527	11985	0.0660154	11985	0.0479432
11986	0.00021719	11986	0.0158004	11986	3.43209	11986	0.0290648	11986	0.0504777	11986	0.0764195
11987	0.000317744	11987	0.0148478	11987	3.04362	11987	0.0367488	11987	0.0470435	11987	0.128095
11988	0.000492967	11988	0.0144013	11988	2.81885	11988	0.0501652	11988	0.0518915	11988	0.211813
11989	0.00077377	11989	0.0142381	11989	2.94358	11989	0.0708356	11989	0.0648343	11989	0.3267
11990	0.00116263	11990	0.014128	11990	3.25997	11990	0.0988675	11990	0.087323	11990	0.451114
11991	0.00157986	11991	0.0138446	11991	3.59118	11991	0.130599	11991	0.120854	11991	0.546651
11992	0.00185463	11992	0.0132356	11992	3.96723	11992	0.157265	11992	0.164395	11992	0.58454
11993	0.00183698	11993	0.0122905	11993	4.71856	11993	0.167488	11993	0.210354	11993	0.56886
11994	0.00154066	11994	0.0111352	11994	6.30778	11994	0.154023	11994	0.241847	11994	0.529401
11995	0.00112649	11995	0.00995744	11995	9.19551	11995	0.120236	11995	0.239003	11995	0.497759
11996	0.000754586	11996	0.00893287	11996	13.3133	11996	0.0793432	11996	0.196708	11996	0.494603
11997	0.000493973	11997	0.0081979	11997	16.4583	11997	0.0451844	11997	0.134345	11997	0.532493
[truncated: 38,003 more rows]
