# Supplementary material for: A moonlighting function of a chitin polysaccharide monooxygenase, CWR-1, in Neurospora crassa allorecognition
Source: eLife. 2022 Aug 30;11:e80459. doi: 10.7554/eLife.80459 (PMC9550227; doi:10.7554/eLife.80459)
Supplement: Figure 1—figure supplement 5—source data 1. — Blank subtracted HPAEC-PAD traces. The samples were prepared as described in ‘Materials and methods'. The time and nC response are listed in the table. [file elife-80459-fig1-figsupp5-data1.xlsx]

## Sheet: Sheet1
Figure 1-figure supplement 5A (chito-oligosaccharide standards)
chitotriose		chitotetraose		chitopentaose		chitohexaose		Mixed
time	nC	time	nC	time	nC	time	nC	time	nC
0.000167	-0.04275	0	0.0302	0	0.0334	0.000333	0.06535	0	0.02955
0.0085	-0.03425	0.008333	0.00935	0.008333	0.00985	0.008667	0.04445	0.008333	-0.00595
0.016833	-0.0246	0.016667	0.00105	0.016667	0.00065	0.017	0.0378	0.016667	-0.00515
0.025167	-0.02535	0.025	0.00405	0.025	0.005	0.025333	0.03975	0.025	-0.002
0.0335	-0.02905	0.033333	0.0094	0.033333	0.00765	0.033667	0.0428	0.033333	-0.00205
0.041833	-0.0306	0.041667	0.00805	0.041667	0.0083	0.042	0.04415	0.041667	-0.0008
0.050167	-0.02765	0.05	0.0098	0.05	0.0095	0.050333	0.04305	0.05	-0.00155
0.0585	-0.028	0.058333	0.01035	0.058333	0.00935	0.058667	0.04295	0.058333	5e-05
0.066833	-0.0267	0.066667	0.0105	0.066667	0.00925	0.067	0.04405	0.066667	0.00085
0.075167	-0.0282	0.075	0.00975	0.075	0.00885	0.075333	0.04285	0.075	-0.0002
0.0835	-0.0248	0.083333	0.01135	0.083333	0.0095	0.083667	0.04385	0.083333	0.00055
0.091833	-0.0266	0.091667	0.00895	0.091667	0.0083	0.092	0.0442	0.091667	-5e-05
0.100167	-0.0238	0.1	0.00975	0.1	0.0094	0.100333	0.0444	0.1	0.00025
0.1085	-0.02585	0.108333	0.0097	0.108333	0.0084	0.108667	0.0442	0.108333	0.0001
0.116833	-0.02535	0.116667	0.01145	0.116667	0.009	0.117	0.04365	0.116667	0.0011
0.125167	-0.02695	0.125	0.01	0.125	0.00805	0.125333	0.04285	0.125	-0.0012
0.1335	-0.02635	0.133333	0.0096	0.133333	0.00865	0.133667	0.0427	0.133333	-0.00065
0.141833	-0.02655	0.141667	0.0091	0.141667	0.00915	0.142	0.04335	0.141667	0.0008
0.150167	-0.025	0.15	0.01005	0.15	0.0101	0.150333	0.0447	0.15	0
0.1585	-0.0257	0.158333	0.01315	0.158333	0.0106	0.158667	0.0462	0.158333	0.0034
0.166833	-0.0273	0.166667	0.0113	0.166667	0.00975	0.167	0.0443	0.166667	-0.00125
0.175167	-0.027	0.175	0.00955	0.175	0.0089	0.175333	0.04395	0.175	-0.0019
0.1835	-0.0254	0.183333	0.0101	0.183333	0.0094	0.183667	0.045	0.183333	0.00015
0.191833	-0.0286	0.191667	0.00925	0.191667	0.008	0.192	0.0427	0.191667	-0.00125
0.200167	-0.02755	0.2	0.0107	0.2	0.00865	0.200333	0.0435	0.2	-0.00125
0.2085	-0.02655	0.208333	0.0119	0.208333	0.01095	0.208667	0.04375	0.208333	0.00065
0.216833	-0.02605	0.216667	0.0124	0.216667	0.0109	0.217	0.04355	0.216667	0.001
0.225167	-0.0273	0.225	0.01195	0.225	0.00855	0.225333	0.04375	0.225	-0.0004
0.2335	-0.0258	0.233333	0.0125	0.233333	0.00985	0.233667	0.045	0.233333	0.0007
0.241833	-0.02485	0.241667	0.0112	0.241667	0.01015	0.242	0.04385	0.241667	0.00075
0.250167	-0.02735	0.25	0.01025	0.25	0.0075	0.250333	0.0435	0.25	-0.00045
0.2585	-0.0257	0.258333	0.01175	0.258333	0.01005	0.258667	0.04485	0.258333	0.0016
0.266833	-0.0264	0.266667	0.0102	0.266667	0.0094	0.267	0.04395	0.266667	-0.0004
0.275167	-0.02565	0.275	0.01045	0.275	0.00935	0.275333	0.045	0.275	-5e-05
0.2835	-0.0269	0.283333	0.01165	0.283333	0.00845	0.283667	0.04445	0.283333	-0.00045
0.291833	-0.0273	0.291667	0.01015	0.291667	0.0076	0.292	0.04335	0.291667	-0.0017
0.300167	-0.02725	0.3	0.0102	0.3	0.0077	0.300333	0.04305	0.3	-0.00185
0.3085	-0.0268	0.308333	0.01035	0.308333	0.00775	0.308667	0.04375	0.308333	-0.0016
0.316833	-0.02685	0.316667	0.0116	0.316667	0.00785	0.317	0.0434	0.316667	-0.0018
0.325167	-0.02825	0.325	0.0094	0.325	0.00655	0.325333	0.04165	0.325	-0.00295
0.3335	-0.0272	0.333333	0.01045	0.333333	0.0076	0.333667	0.0426	0.333333	-0.00155
0.341833	-0.0276	0.341667	0.01195	0.341667	0.00915	0.342	0.0436	0.341667	-0.00085
0.350167	-0.02995	0.35	0.01165	0.35	0.0075	0.350333	0.04235	0.35	-0.0013
0.3585	-0.02795	0.358333	0.0112	0.358333	0.00935	0.358667	0.043	0.358333	-0.0015
0.366833	-0.0287	0.366667	0.01135	0.366667	0.0078	0.367	0.04245	0.366667	-0.0006
0.375167	-0.0287	0.375	0.01045	0.375	0.00805	0.375333	0.0423	0.375	-0.0016
0.3835	-0.03035	0.383333	0.00985	0.383333	0.0059	0.383667	0.04025	0.383333	-0.0023
0.391833	-0.02795	0.391667	0.0114	0.391667	0.00805	0.392	0.0425	0.391667	-0.00025
0.400167	-0.02755	0.4	0.01245	0.4	0.0097	0.400333	0.0439	0.4	0.00105
0.4085	-0.0276	0.408333	0.01285	0.408333	0.00985	0.408667	0.0436	0.408333	0.0005
0.416833	-0.02685	0.416667	0.0126	0.416667	0.0103	0.417	0.0438	0.416667	-5e-05
0.425167	-0.0281	0.425	0.00975	0.425	0.0085	0.425333	0.04225	0.425	-0.0021
0.4335	-0.0274	0.433333	0.01085	0.433333	0.00865	0.433667	0.04235	0.433333	-0.0004
0.441833	-0.0301	0.441667	0.01055	0.441667	0.00745	0.442	0.0416	0.441667	-0.00205
0.450167	-0.0281	0.45	0.0106	0.45	0.0086	0.450333	0.04365	0.45	-0.00045
0.4585	-0.0273	0.458333	0.0126	0.458333	0.0095	0.458667	0.0438	0.458333	-0.00155
0.466833	-0.02705	0.466667	0.01265	0.466667	0.00885	0.467	0.04335	0.466667	-0.0017
0.475167	-0.02595	0.475	0.01295	0.475	0.00975	0.475333	0.0455	0.475	0
0.4835	-0.0253	0.483333	0.01295	0.483333	0.01055	0.483667	0.0447	0.483333	-5e-05
0.491833	-0.02715	0.491667	0.01315	0.491667	0.00965	0.492	0.0438	0.491667	-0.00195
0.500167	-0.02705	0.5	0.013	0.5	0.00975	0.500333	0.04385	0.5	-0.00185
0.5085	-0.02745	0.508333	0.0131	0.508333	0.01015	0.508667	0.04415	0.508333	-0.00075
0.516833	-0.02655	0.516667	0.012	0.516667	0.01035	0.517	0.04375	0.516667	-0.00115
0.525167	-0.0271	0.525	0.0141	0.525	0.0098	0.525333	0.04535	0.525	0.0006
0.5335	-0.027	0.533333	0.01335	0.533333	0.01055	0.533667	0.04515	0.533333	0.0013
0.541833	-0.0263	0.541667	0.01555	0.541667	0.012	0.542	0.04455	0.541667	0.00035
0.550167	-0.0289	0.55	0.0116	0.55	0.00885	0.550333	0.0413	0.55	-0.0015
0.5585	-0.026	0.558333	0.01275	0.558333	0.01085	0.558667	0.044	0.558333	5e-05
0.566833	-0.0262	0.566667	0.012	0.566667	0.00885	0.567	0.04485	0.566667	0.00065
0.575167	-0.02655	0.575	0.014	0.575	0.0095	0.575333	0.0447	0.575	0
0.5835	-0.02855	0.583333	0.0127	0.583333	0.00985	0.583667	0.0441	0.583333	0.00015
0.591833	-0.02905	0.591667	0.01385	0.591667	0.0104	0.592	0.04435	0.591667	0.00065
0.600167	-0.02625	0.6	0.01285	0.6	0.00925	0.600333	0.0451	0.6	0.0007
0.6085	-0.02425	0.608333	0.0135	0.608333	0.01065	0.608667	0.0452	0.608333	0.0013
0.616833	-0.0242	0.616667	0.0125	0.616667	0.0093	0.617	0.044	0.616667	-0.0006
0.625167	-0.02495	0.625	0.01465	0.625	0.0093	0.625333	0.04585	0.625	-0.00115
0.6335	-0.0239	0.633333	0.0148	0.633333	0.01075	0.633667	0.0473	0.633333	0.0007
0.641833	-0.02305	0.641667	0.0158	0.641667	0.01215	0.642	0.04645	0.641667	0.0009
0.650167	-0.0223	0.65	0.0154	0.65	0.01225	0.650333	0.0459	0.65	0.00215
0.6585	-0.02355	0.658333	0.014	0.658333	0.01215	0.658667	0.04545	0.658333	0.0019
0.666833	-0.02225	0.666667	0.0145	0.666667	0.0127	0.667	0.04725	0.666667	0.00265
0.675167	-0.02195	0.675	0.01565	0.675	0.01375	0.675333	0.04735	0.675	0.00135
0.6835	-0.02235	0.683333	0.01585	0.683333	0.01375	0.683667	0.04655	0.683333	0.0032
0.691833	-0.0227	0.691667	0.01635	0.691667	0.0134	0.692	0.04845	0.691667	0.0032
0.700167	-0.02405	0.7	0.01455	0.7	0.0117	0.700333	0.0459	0.7	0.00135
0.7085	-0.0225	0.708333	0.0151	0.708333	0.01365	0.708667	0.04695	0.708333	0.0039
0.716833	-0.0245	0.716667	0.01315	0.716667	0.01255	0.717	0.04505	0.716667	0.00385
0.725167	-0.0236	0.725	0.01595	0.725	0.01275	0.725333	0.0477	0.725	0.0043
0.7335	-0.02475	0.733333	0.0145	0.733333	0.01185	0.733667	0.04685	0.733333	0.00215
0.741833	-0.0233	0.741667	0.015	0.741667	0.0116	0.742	0.04565	0.741667	0.00305
0.750167	-0.0223	0.75	0.0181	0.75	0.0131	0.750333	0.04835	0.75	0.00445
0.7585	-0.024	0.758333	0.01565	0.758333	0.0115	0.758667	0.0461	0.758333	0.0029
0.766833	-0.0234	0.766667	0.0177	0.766667	0.01395	0.767	0.04715	0.766667	0.0043
0.775167	-0.02415	0.775	0.0166	0.775	0.01065	0.775333	0.04605	0.775	0.0042
0.7835	-0.0234	0.783333	0.0172	0.783333	0.01275	0.783667	0.0481	0.783333	0.00465
0.791833	-0.0239	0.791667	0.016	0.791667	0.01195	0.792	0.047	0.791667	0.00255
0.800167	-0.0229	0.8	0.01485	0.8	0.01235	0.800333	0.0464	0.8	0.0022
0.8085	-0.02495	0.808333	0.01395	0.808333	0.0107	0.808667	0.04515	0.808333	0.00085
0.816833	-0.02415	0.816667	0.01555	0.816667	0.01125	0.817	0.04685	0.816667	0.00315
0.825167	-0.02705	0.825	0.01425	0.825	0.0098	0.825333	0.04635	0.825	0.00085
0.8335	-0.02465	0.833333	0.0157	0.833333	0.01095	0.833667	0.04675	0.833333	0.0011
0.841833	-0.0243	0.841667	0.01545	0.841667	0.01095	0.842	0.0472	0.841667	0.0014
0.850167	-0.02475	0.85	0.0146	0.85	0.01045	0.850333	0.0469	0.85	0.00085
0.8585	-0.02375	0.858333	0.01505	0.858333	0.01075	0.858667	0.04735	0.858333	0.0027
0.866833	-0.02385	0.866667	0.0159	0.866667	0.0119	0.867	0.04725	0.866667	0.00235
0.875167	-0.02485	0.875	0.0158	0.875	0.0107	0.875333	0.0466	0.875	0.0029
0.8835	-0.0238	0.883333	0.01625	0.883333	0.0105	0.883667	0.045	0.883333	0.00125
0.891833	-0.02445	0.891667	0.0163	0.891667	0.01045	0.892	0.0454	0.891667	0.00185
0.900167	-0.0222	0.9	0.01855	0.9	0.0132	0.900333	0.0491	0.9	0.0035
0.9085	-0.02505	0.908333	0.0171	0.908333	0.0128	0.908667	0.04685	0.908333	0.00255
0.916833	-0.02405	0.916667	0.0177	0.916667	0.0131	0.917	0.0467	0.916667	0.0018
0.925167	-0.02545	0.925	0.01505	0.925	0.01205	0.925333	0.0459	0.925	0.00155
0.9335	-0.02625	0.933333	0.01655	0.933333	0.0111	0.933667	0.0461	0.933333	0.00185
0.941833	-0.0254	0.941667	0.0179	0.941667	0.012	0.942	0.0462	0.941667	0.00355
0.950167	-0.02635	0.95	0.0169	0.95	0.01155	0.950333	0.0464	0.95	0.0011
0.9585	-0.02605	0.958333	0.01835	0.958333	0.0126	0.958667	0.0463	0.958333	0.0027
0.966833	-0.0262	0.966667	0.0168	0.966667	0.0108	0.967	0.04585	0.966667	0.0009
0.975167	-0.02465	0.975	0.01675	0.975	0.0114	0.975333	0.04735	0.975	0.001
0.9835	-0.02505	0.983333	0.0168	0.983333	0.01045	0.983667	0.04715	0.983333	0.00185
0.991833	-0.0231	0.991667	0.01665	0.991667	0.01165	0.992	0.0463	0.991667	0.00075
1.00017	-0.0249	1	0.0171	1	0.0107	1.00033	0.04555	1	0.0012
1.0085	-0.02545	1.00833	0.0187	1.00833	0.0121	1.00867	0.04825	1.00833	0.0025
1.01683	-0.0257	1.01667	0.018	1.01667	0.0114	1.017	0.0468	1.01667	0.0027
1.02517	-0.02445	1.025	0.0184	1.025	0.01125	1.02533	0.04745	1.025	0.002
1.0335	-0.02445	1.03333	0.01945	1.03333	0.01215	1.03367	0.049	1.03333	0.00125
1.04183	-0.02305	1.04167	0.01955	1.04167	0.0127	1.042	0.04825	1.04167	0.0015
1.05017	-0.02435	1.05	0.01915	1.05	0.0127	1.05033	0.0471	1.05	0.00205
1.0585	-0.02555	1.05833	0.0185	1.05833	0.0123	1.05867	0.04605	1.05833	0.0016
1.06683	-0.02575	1.06667	0.0184	1.06667	0.0126	1.067	0.04665	1.06667	0.00265
1.07517	-0.0261	1.075	0.0183	1.075	0.01105	1.07533	0.0472	1.075	0.00165
1.0835	-0.02415	1.08333	0.01905	1.08333	0.0122	1.08367	0.04725	1.08333	0.0025
1.09183	-0.025	1.09167	0.01945	1.09167	0.01385	1.092	0.04825	1.09167	0.0042
1.10017	-0.02685	1.1	0.01985	1.1	0.01245	1.10033	0.04785	1.1	0.00095
1.1085	-0.0256	1.10833	0.01945	1.10833	0.01375	1.10867	0.0469	1.10833	0.0001
1.11683	-0.0251	1.11667	0.0199	1.11667	0.0144	1.117	0.04685	1.11667	0.0017
1.12517	-0.02625	1.125	0.01835	1.125	0.01145	1.12533	0.0459	1.125	-0.0001
1.1335	-0.02595	1.13333	0.0195	1.13333	0.014	1.13367	0.0475	1.13333	0.00295
1.14183	-0.02625	1.14167	0.0192	1.14167	0.01215	1.142	0.0453	1.14167	0.00185
1.15017	-0.02625	1.15	0.0184	1.15	0.0116	1.15033	0.0453	1.15	0.0014
1.1585	-0.0261	1.15833	0.01985	1.15833	0.0121	1.15867	0.0464	1.15833	0.00095
1.16683	-0.0256	1.16667	0.021	1.16667	0.0127	1.167	0.04815	1.16667	0.00095
1.17517	-0.02465	1.175	0.02085	1.175	0.01145	1.17533	0.0467	1.175	0.00125
1.1835	-0.0266	1.18333	0.0184	1.18333	0.01145	1.18367	0.045	1.18333	0.00015
1.19183	-0.02555	1.19167	0.01815	1.19167	0.0113	1.192	0.0454	1.19167	0
1.20017	-0.02455	1.2	0.02005	1.2	0.01315	1.20033	0.04685	1.2	0.00155
1.2085	-0.0262	1.20833	0.01975	1.20833	0.01135	1.20867	0.0443	1.20833	0.0004
1.21683	-0.0246	1.21667	0.02015	1.21667	0.01365	1.217	0.04625	1.21667	0.002
1.22517	-0.026	1.225	0.02015	1.225	0.01235	1.22533	0.046	1.225	0.00045
1.2335	-0.02405	1.23333	0.01975	1.23333	0.01205	1.23367	0.04545	1.23333	-0.0005
1.24183	-0.0249	1.24167	0.02055	1.24167	0.01265	1.242	0.0453	1.24167	0.0013
1.25017	-0.0251	1.25	0.01985	1.25	0.01305	1.25033	0.04545	1.25	0.00225
1.2585	-0.0248	1.25833	0.0197	1.25833	0.01245	1.25867	0.0462	1.25833	0.00245
1.26683	-0.02535	1.26667	0.01885	1.26667	0.01205	1.267	0.0453	1.26667	0.0011
1.27517	-0.02465	1.275	0.02125	1.275	0.0138	1.27533	0.0468	1.275	0.00225
1.2835	-0.0249	1.28333	0.0209	1.28333	0.0125	1.28367	0.04605	1.28333	-0.00025
1.29183	-0.02005	1.29167	0.02545	1.29167	0.0175	1.292	0.051	1.29167	0.0048
1.30017	-0.013	1.3	0.033	1.3	0.0268	1.30033	0.05845	1.3	0.01375
1.3085	-0.0396	1.30833	0.0064	1.30833	-0.0009	1.30867	0.0315	1.30833	-0.0125
1.31683	-0.0542	1.31667	-0.00705	1.31667	-0.0162	1.317	0.0174	1.31667	-0.0263
1.32517	-0.03015	1.325	0.0155	1.325	0.00715	1.32533	0.03975	1.325	-0.00295
1.3335	-0.02605	1.33333	0.0206	1.33333	0.01265	1.33367	0.0451	1.33333	0.00295
1.34183	-0.0266	1.34167	0.0204	1.34167	0.01105	1.342	0.04495	1.34167	0.00215
1.35017	-0.0261	1.35	0.0206	1.35	0.01155	1.35033	0.0464	1.35	0.0015
1.3585	-0.02555	1.35833	0.0213	1.35833	0.011	1.35867	0.04635	1.35833	0.0011
1.36683	-0.0243	1.36667	0.0222	1.36667	0.01175	1.367	0.04645	1.36667	0.0024
1.37517	-0.0266	1.375	0.0203	1.375	0.0115	1.37533	0.04485	1.375	0.0008
1.3835	-0.02575	1.38333	0.0209	1.38333	0.0121	1.38367	0.04695	1.38333	0.0022
1.39183	-0.0261	1.39167	0.01985	1.39167	0.01255	1.392	0.0454	1.39167	0.00115
1.40017	-0.0254	1.4	0.02035	1.4	0.01145	1.40033	0.04485	1.4	0.00175
1.4085	-0.02505	1.40833	0.0213	1.40833	0.01155	1.40867	0.0454	1.40833	0.00095
1.41683	-0.02435	1.41667	0.02065	1.41667	0.01255	1.417	0.04565	1.41667	0.0016
1.42517	-0.0241	1.425	0.02035	1.425	0.01165	1.42533	0.0463	1.425	0.0017
1.4335	-0.0242	1.43333	0.021	1.43333	0.01235	1.43367	0.0465	1.43333	0.00235
1.44183	-0.0253	1.44167	0.0223	1.44167	0.0124	1.442	0.04715	1.44167	0.00305
1.45017	-0.0255	1.45	0.02165	1.45	0.01215	1.45033	0.04585	1.45	0.001
1.4585	-0.0259	1.45833	0.02055	1.45833	0.0131	1.45867	0.04615	1.45833	0.0007
1.46683	-0.0246	1.46667	0.0216	1.46667	0.0129	1.467	0.04615	1.46667	0.0029
1.47517	-0.0265	1.475	0.0224	1.475	0.01275	1.47533	0.04675	1.475	0.002
1.4835	-0.0272	1.48333	0.0209	1.48333	0.0117	1.48367	0.04565	1.48333	0.00175
1.49183	-0.0265	1.49167	0.0215	1.49167	0.0122	1.492	0.0466	1.49167	0.00205
1.50017	-0.02575	1.5	0.0215	1.5	0.01275	1.50033	0.04615	1.5	0.00125
1.5085	-0.02545	1.50833	0.0228	1.50833	0.0138	1.50867	0.04775	1.50833	0.00215
1.51683	-0.026	1.51667	0.0217	1.51667	0.0124	1.517	0.04625	1.51667	0.00245
1.52517	-0.02475	1.525	0.0229	1.525	0.0133	1.52533	0.04815	1.525	0.0031
1.5335	-0.02445	1.53333	0.02295	1.53333	0.01315	1.53367	0.0473	1.53333	0.0041
1.54183	-0.0237	1.54167	0.02355	1.54167	0.0134	1.542	0.04765	1.54167	0.00355
1.55017	-0.0224	1.55	0.0243	1.55	0.01505	1.55033	0.049	1.55	0.00375
1.5585	-0.0246	1.55833	0.02385	1.55833	0.01355	1.55867	0.04595	1.55833	0.00185
1.56683	-0.02515	1.56667	0.024	1.56667	0.0131	1.567	0.04715	1.56667	0.00305
1.57517	-0.02585	1.575	0.0228	1.575	0.01245	1.57533	0.04715	1.575	0.0026
1.5835	-0.02565	1.58333	0.0223	1.58333	0.0129	1.58367	0.0465	1.58333	0.00245
1.59183	-0.0262	1.59167	0.02265	1.59167	0.01365	1.592	0.0458	1.59167	0.0034
1.60017	-0.0254	1.6	0.02265	1.6	0.01265	1.60033	0.04715	1.6	0.003
1.6085	-0.02435	1.60833	0.0235	1.60833	0.01405	1.60867	0.04755	1.60833	0.00315
1.61683	-0.0242	1.61667	0.0247	1.61667	0.01435	1.617	0.04675	1.61667	0.0034
1.62517	-0.02325	1.625	0.0251	1.625	0.0149	1.62533	0.0482	1.625	0.0036
1.6335	-0.02545	1.63333	0.02455	1.63333	0.01415	1.63367	0.0477	1.63333	0.00315
1.64183	-0.02565	1.64167	0.02395	1.64167	0.0134	1.642	0.0471	1.64167	0.00265
1.65017	-0.02745	1.65	0.02435	1.65	0.01445	1.65033	0.04725	1.65	0.0051
1.6585	-0.02525	1.65833	0.0247	1.65833	0.01565	1.65867	0.04955	1.65833	0.00775
1.66683	-0.02475	1.66667	0.024	1.66667	0.0154	1.667	0.04765	1.66667	0.0046
1.67517	-0.02335	1.675	0.02285	1.675	0.01455	1.67533	0.0465	1.675	0.00295
1.6835	-0.0209	1.68333	0.0249	1.68333	0.015	1.68367	0.0478	1.68333	0.00525
1.69183	-0.0223	1.69167	0.02505	1.69167	0.01405	1.692	0.0481	1.69167	0.00545
1.70017	-0.0223	1.7	0.02515	1.7	0.0137	1.70033	0.04695	1.7	0.0039
1.7085	-0.02335	1.70833	0.0244	1.70833	0.0137	1.70867	0.04615	1.70833	0.00445
1.71683	-0.02375	1.71667	0.02635	1.71667	0.01595	1.717	0.04665	1.71667	0.00545
1.72517	-0.02405	1.725	0.02545	1.725	0.01525	1.72533	0.0478	1.725	0.00455
1.7335	-0.0248	1.73333	0.0244	1.73333	0.0132	1.73367	0.04695	1.73333	0.00485
1.74183	-0.02525	1.74167	0.0237	1.74167	0.0136	1.742	0.0468	1.74167	0.0037
1.75017	-0.02455	1.75	0.0263	1.75	0.01485	1.75033	0.0484	1.75	0.0048
1.7585	-0.0258	1.75833	0.02315	1.75833	0.01385	1.75867	0.04775	1.75833	0.00295
1.76683	-0.0238	1.76667	0.0251	1.76667	0.01385	1.767	0.04675	1.76667	0.00395
1.77517	-0.0235	1.775	0.02675	1.775	0.0158	1.77533	0.0488	1.775	0.00455
1.7835	-0.0246	1.78333	0.0253	1.78333	0.01515	1.78367	0.04865	1.78333	0.0036
1.79183	-0.0237	1.79167	0.0251	1.79167	0.01675	1.792	0.0492	1.79167	0.00425
1.80017	-0.02385	1.8	0.02445	1.8	0.01675	1.80033	0.04745	1.8	0.0037
1.8085	-0.0246	1.80833	0.0256	1.80833	0.01665	1.80867	0.0483	1.80833	0.0037
1.81683	-0.0256	1.81667	0.0261	1.81667	0.01425	1.817	0.04665	1.81667	0.0028
1.82517	-0.02545	1.825	0.0253	1.825	0.0157	1.82533	0.04715	1.825	0.00295
1.8335	-0.0241	1.83333	0.0247	1.83333	0.0165	1.83367	0.0487	1.83333	0.00345
1.84183	-0.0248	1.84167	0.02675	1.84167	0.01815	1.842	0.0489	1.84167	0.00555
1.85017	-0.0247	1.85	0.02765	1.85	0.01765	1.85033	0.04835	1.85	0.0053
1.8585	-0.02575	1.85833	0.0261	1.85833	0.0154	1.85867	0.0477	1.85833	0.00305
1.86683	-0.02465	1.86667	0.0246	1.86667	0.0158	1.867	0.04585	1.86667	0.0025
1.87517	-0.0254	1.875	0.0253	1.875	0.016	1.87533	0.0464	1.875	0.00285
1.8835	-0.0258	1.88333	0.02525	1.88333	0.0158	1.88367	0.0454	1.88333	0.0025
1.89183	-0.02525	1.89167	0.0246	1.89167	0.01505	1.892	0.04645	1.89167	0.0038
1.90017	-0.02515	1.9	0.0237	1.9	0.0153	1.90033	0.0446	1.9	0.00195
1.9085	-0.0234	1.90833	0.02675	1.90833	0.0163	1.90867	0.0475	1.90833	0.0043
1.91683	-0.02365	1.91667	0.02735	1.91667	0.0167	1.917	0.0477	1.91667	0.00455
1.92517	-0.02265	1.925	0.0268	1.925	0.0165	1.92533	0.04755	1.925	0.0051
1.9335	-0.02495	1.93333	0.02505	1.93333	0.01495	1.93367	0.0465	1.93333	0.00355
1.94183	-0.02475	1.94167	0.02635	1.94167	0.01625	1.942	0.047	1.94167	0.0041
1.95017	-0.02345	1.95	0.02765	1.95	0.01615	1.95033	0.04905	1.95	0.00465
1.9585	-0.02445	1.95833	0.0264	1.95833	0.01595	1.95867	0.0467	1.95833	0.00335
1.96683	-0.0235	1.96667	0.0267	1.96667	0.0164	1.967	0.04855	1.96667	0.00535
1.97517	-0.02445	1.975	0.0263	1.975	0.01705	1.97533	0.04815	1.975	0.004
1.9835	-0.02305	1.98333	0.02905	1.98333	0.0163	1.98367	0.04875	1.98333	0.0049
1.99183	-0.02215	1.99167	0.0271	1.99167	0.0163	1.992	0.04865	1.99167	0.00605
2.00017	-0.02225	2	0.0281	2	0.0168	2.00033	0.0502	2	0.0053
2.0085	-0.02095	2.00833	0.0285	2.00833	0.01765	2.00867	0.05	2.00833	0.0064
2.01683	-0.0236	2.01667	0.02855	2.01667	0.01665	2.017	0.0484	2.01667	0.00545
2.02517	-0.01995	2.025	0.03045	2.025	0.01985	2.02533	0.0505	2.025	0.00825
2.0335	-0.02045	2.03333	0.0303	2.03333	0.01815	2.03367	0.0506	2.03333	0.0075
2.04183	-0.021	2.04167	0.0294	2.04167	0.0198	2.042	0.04905	2.04167	0.00665
2.05017	-0.0225	2.05	0.0292	2.05	0.0182	2.05033	0.04955	2.05	0.00515
2.0585	-0.02305	2.05833	0.0285	2.05833	0.01615	2.05867	0.049	2.05833	0.003
2.06683	-0.0243	2.06667	0.0251	2.06667	0.0111	2.067	0.0459	2.06667	-0.0049
2.07517	-0.0315	2.075	0.00965	2.075	-0.00665	2.07533	0.0308	2.075	-0.02685
2.0835	-0.0557	2.08333	-0.0271	2.08333	-0.0455	2.08367	-0.0046	2.08333	-0.06625
2.09183	-0.1152	2.09167	-0.09335	2.09167	-0.10995	2.092	-0.07225	2.09167	-0.1161
2.10017	-0.21085	2.1	-0.1752	2.1	-0.1819	2.10033	-0.15595	2.1	-0.16165
2.1085	-0.32115	2.10833	-0.2434	2.10833	-0.236	2.10867	-0.2258	2.10833	-0.18695
2.11683	-0.3972	2.11667	-0.2682	2.11667	-0.2496	2.117	-0.2548	2.11667	-0.18845
2.12517	-0.3987	2.125	-0.2406	2.125	-0.22045	2.12533	-0.22645	2.125	-0.17935
2.1335	-0.308	2.13333	-0.16395	2.13333	-0.1583	2.13367	-0.1477	2.13333	-0.17045
2.14183	-0.16615	2.14167	-0.07325	2.14167	-0.0942	2.142	-0.0511	2.14167	-0.1709
2.15017	-0.03135	2.15	0.0042	2.15	-0.0402	2.15033	0.0331	2.15	-0.15355
2.1585	0.0703	2.15833	0.0677	2.15833	0.01195	2.15867	0.0975	2.15833	-0.0945
2.16683	0.14485	2.16667	0.125	2.16667	0.0754	2.167	0.15465	2.16667	0.01105
2.17517	0.2048	2.175	0.1866	2.175	0.1556	2.17533	0.2134	2.175	0.1429
2.1835	0.25375	2.18333	0.24265	2.18333	0.2345	2.18367	0.2699	2.18333	0.26205
2.19183	0.2661	2.19167	0.2684	2.19167	0.28325	2.192	0.2992	2.19167	0.3337
2.20017	0.2115	2.2	0.2268	2.2	0.2729	2.20033	0.2711	2.2	0.3277
2.2085	0.0566	2.20833	0.08665	2.20833	0.17435	2.20867	0.15595	2.20833	0.21655
2.21683	-0.2167	2.21667	-0.175	2.21667	-0.02875	2.217	-0.0666	2.21667	-0.0124
2.22517	-0.593	2.225	-0.54485	2.225	-0.32725	2.22533	-0.38635	2.225	-0.34975
2.2335	-1.0259	2.23333	-0.98145	2.23333	-0.67905	2.23367	-0.76395	2.23333	-0.75025
2.24183	-1.4534	2.24167	-1.4158	2.24167	-1.03425	2.242	-1.1407	2.24167	-1.1556
2.25017	-1.8142	2.25	-1.786	2.25	-1.3376	2.25033	-1.46165	2.25	-1.5051
2.2585	-2.07555	2.25833	-2.0553	2.25833	-1.5612	2.25867	-1.69285	2.25833	-1.7644
2.26683	-2.2185	2.26667	-2.20265	2.26667	-1.6875	2.267	-1.82075	2.26667	-1.9173
2.27517	-2.251	2.275	-2.2307	2.275	-1.72075	2.27533	-1.8477	2.275	-1.96155
2.2835	-2.1904	2.28333	-2.16545	2.28333	-1.67655	2.28367	-1.7941	2.28333	-1.919
2.29183	-2.0618	2.29167	-2.03055	2.29167	-1.57715	2.292	-1.68025	2.29167	-1.8111
2.30017	-1.8895	2.3	-1.8557	2.3	-1.44505	2.30033	-1.5306	2.3	-1.6604
2.3085	-1.69865	2.30833	-1.65975	2.30833	-1.29635	2.30867	-1.36585	2.30833	-1.4865
2.31683	-1.50715	2.31667	-1.4605	2.31667	-1.1426	2.317	-1.19555	2.31667	-1.29895
2.32517	-1.3209	2.325	-1.26885	2.325	-0.98675	2.32533	-1.02565	2.325	-1.0921
2.3335	-1.14585	2.33333	-1.0915	2.33333	-0.8288	2.33367	-0.85495	2.33333	-0.85155
2.34183	-0.9862	2.34167	-0.9314	2.34167	-0.66085	2.342	-0.6741	2.34167	-0.55905
2.35017	-0.8352	2.35	-0.78925	2.35	-0.47415	2.35033	-0.4745	2.35	-0.20155
2.3585	-0.6913	2.35833	-0.6618	2.35833	-0.26575	2.35867	-0.2508	2.35833	0.2109
2.36683	-0.55075	2.36667	-0.55315	2.36667	-0.04695	2.367	-0.009	2.36667	0.64335
2.37517	-0.4124	2.375	-0.45975	2.375	0.1661	2.37533	0.2375	2.375	1.0602
2.3835	-0.2782	2.38333	-0.3778	2.38333	0.36	2.38367	0.4676	2.38333	1.42045
2.39183	-0.15855	2.39167	-0.31065	2.39167	0.52345	2.392	0.6653	2.39167	1.70035
2.40017	-0.0615	2.4	-0.25145	2.4	0.64885	2.40033	0.82415	2.4	1.89025
2.4085	0.0019	2.40833	-0.2041	2.40833	0.7318	2.40867	0.9341	2.40833	1.99135
2.41683	0.03805	2.41667	-0.1633	2.41667	0.77955	2.417	1.00075	2.41667	2.01555
2.42517	0.0539	2.425	-0.12975	2.425	0.79485	2.42533	1.02835	2.425	1.9828
2.4335	0.05605	2.43333	-0.0988	2.43333	0.7857	2.43367	1.0246	2.43333	1.9021
2.44183	0.05245	2.44167	-0.07255	2.44167	0.7578	2.442	0.99845	2.44167	1.79235
2.45017	0.0476	2.45	-0.04965	2.45	0.7182	2.45033	0.95345	2.45	1.66515
2.4585	0.04215	2.45833	-0.0289	2.45833	0.67405	2.45867	0.9011	2.45833	1.5298
2.46683	0.03675	2.46667	-0.00765	2.46667	0.6274	2.467	0.84405	2.46667	1.39595
2.47517	0.0305	2.475	0.01105	2.475	0.5799	2.47533	0.7856	2.475	1.26645
2.4835	0.02765	2.48333	0.02855	2.48333	0.53765	2.48367	0.73145	2.48333	1.1474
2.49183	0.02635	2.49167	0.04755	2.49167	0.4985	2.492	0.6808	2.49167	1.0412
2.50017	0.02445	2.5	0.06425	2.5	0.46455	2.50033	0.63445	2.5	0.9463
2.5085	0.0237	2.50833	0.0815	2.50833	0.43555	2.50867	0.59625	2.50833	0.8651
2.51683	0.028	2.51667	0.10075	2.51667	0.4145	2.517	0.56525	2.51667	0.79755
2.52517	0.0319	2.525	0.11685	2.525	0.39425	2.52533	0.5375	2.525	0.7395
2.5335	0.0361	2.53333	0.1327	2.53333	0.37805	2.53367	0.51635	2.53333	0.6897
2.54183	0.04005	2.54167	0.1467	2.54167	0.36565	2.542	0.49745	2.54167	0.6479
2.55017	0.0466	2.55	0.16095	2.55	0.3572	2.55033	0.4825	2.55	0.6151
2.5585	0.05095	2.55833	0.17245	2.55833	0.34795	2.55867	0.47055	2.55833	0.58585
2.56683	0.05505	2.56667	0.18295	2.56667	0.3389	2.567	0.45885	2.56667	0.56205
2.57517	0.0586	2.575	0.1925	2.575	0.3321	2.57533	0.4522	2.575	0.5427
2.5835	0.06145	2.58333	0.19995	2.58333	0.3275	2.58367	0.4447	2.58333	0.52425
2.59183	0.06925	2.59167	0.21175	2.59167	0.3264	2.592	0.44225	2.59167	0.51635
2.60017	0.0727	2.6	0.2195	2.6	0.3238	2.60033	0.43865	2.6	0.50455
2.6085	0.07935	2.60833	0.22635	2.60833	0.32355	2.60867	0.43615	2.60833	0.4961
2.61683	0.07455	2.61667	0.2211	2.61667	0.3125	2.617	0.4232	2.61667	0.4779
2.62517	0.0833	2.625	0.2306	2.625	0.3138	2.62533	0.42465	2.625	0.4748
2.6335	0.08425	2.63333	0.23315	2.63333	0.3104	2.63367	0.4172	2.63333	0.46585
2.64183	0.089	2.64167	0.2361	2.64167	0.30915	2.642	0.4141	2.64167	0.45905
2.65017	0.09155	2.65	0.2388	2.65	0.3052	2.65033	0.411	2.65	0.4525
2.6585	0.09425	2.65833	0.24	2.65833	0.3029	2.65867	0.4061	2.65833	0.44685
2.66683	0.09645	2.66667	0.23985	2.66667	0.30065	2.667	0.40215	2.66667	0.4397
2.67517	0.0968	2.675	0.2399	2.675	0.29855	2.67533	0.39845	2.675	0.43485
2.6835	0.09685	2.68333	0.2408	2.68333	0.29485	2.68367	0.3926	2.68333	0.42995
2.69183	0.09555	2.69167	0.24055	2.69167	0.2946	2.692	0.391	2.69167	0.4275
2.70017	0.09595	2.7	0.24135	2.7	0.2924	2.70033	0.38815	2.7	0.4249
2.7085	0.0958	2.70833	0.23735	2.70833	0.29075	2.70867	0.38615	2.70833	0.4219
2.71683	0.09495	2.71667	0.23745	2.71667	0.29	2.717	0.3841	2.71667	0.4208
2.72517	0.09585	2.725	0.23655	2.725	0.29035	2.72533	0.38365	2.725	0.4188
2.7335	0.09555	2.73333	0.23605	2.73333	0.2893	2.73367	0.382	2.73333	0.4178
2.74183	0.09355	2.74167	0.23385	2.74167	0.289	2.742	0.3801	2.74167	0.41375
2.75017	0.09175	2.75	0.23165	2.75	0.2865	2.75033	0.37865	2.75	0.41015
2.7585	0.0921	2.75833	0.2304	2.75833	0.28475	2.75867	0.37555	2.75833	0.40685
2.76683	0.09125	2.76667	0.2289	2.76667	0.28215	2.767	0.3732	2.76667	0.40115
2.77517	0.0907	2.775	0.2282	2.775	0.28015	2.77533	0.36975	2.775	0.3947
2.7835	0.09195	2.78333	0.2277	2.78333	0.27585	2.78367	0.3656	2.78333	0.3907
2.79183	0.0941	2.79167	0.22905	2.79167	0.2746	2.792	0.36095	2.79167	0.3832
2.80017	0.09255	2.8	0.22595	2.8	0.27065	2.80033	0.3548	2.8	0.3767
2.8085	0.09405	2.80833	0.22625	2.80833	0.2667	2.80867	0.3486	2.80833	0.368
2.81683	0.0934	2.81667	0.22375	2.81667	0.26235	2.817	0.34135	2.81667	0.3599
2.82517	0.0912	2.825	0.2218	2.825	0.2554	2.82533	0.33475	2.825	0.3508
2.8335	0.09205	2.83333	0.22	2.83333	0.253	2.83367	0.32945	2.83333	0.34345
2.84183	0.08985	2.84167	0.2202	2.84167	0.248	2.842	0.32285	2.84167	0.3351
2.85017	0.08895	2.85	0.21885	2.85	0.24325	2.85033	0.3176	2.85	0.3273
2.8585	0.0869	2.85833	0.2166	2.85833	0.2392	2.85867	0.31135	2.85833	0.3178
2.86683	0.08475	2.86667	0.2151	2.86667	0.23495	2.867	0.30405	2.86667	0.30895
2.87517	0.08365	2.875	0.2133	2.875	0.2317	2.87533	0.2992	2.875	0.301
2.8835	0.08125	2.88333	0.2115	2.88333	0.2271	2.88367	0.29505	2.88333	0.29375
2.89183	0.0792	2.89167	0.2088	2.89167	0.2229	2.892	0.28855	2.89167	0.28655
2.90017	0.07645	2.9	0.20575	2.9	0.21885	2.90033	0.28415	2.9	0.28035
2.9085	0.0741	2.90833	0.20385	2.90833	0.21475	2.90867	0.28035	2.90833	0.2729
2.91683	0.07345	2.91667	0.20065	2.91667	0.21125	2.917	0.2754	2.91667	0.26795
2.92517	0.07345	2.925	0.2007	2.925	0.2094	2.92533	0.27165	2.925	0.2629
2.9335	0.07065	2.93333	0.1986	2.93333	0.20525	2.93367	0.2677	2.93333	0.25755
2.94183	0.0691	2.94167	0.19575	2.94167	0.20075	2.942	0.26445	2.94167	0.2536
2.95017	0.06685	2.95	0.19265	2.95	0.19895	2.95033	0.2603	2.95	0.24755
2.9585	0.0654	2.95833	0.19115	2.95833	0.1963	2.95867	0.25675	2.95833	0.2441
2.96683	0.0626	2.96667	0.19025	2.96667	0.19335	2.967	0.255	2.96667	0.2406
2.97517	0.0608	2.975	0.1865	2.975	0.19035	2.97533	0.2506	2.975	0.2365
2.9835	0.05745	2.98333	0.18305	2.98333	0.1869	2.98367	0.24615	2.98333	0.23095
2.99183	0.05845	2.99167	0.1806	2.99167	0.1861	2.992	0.2439	2.99167	0.22865
3.00017	0.0557	3	0.17915	3	0.183	3.00033	0.24115	3	0.22445
3.0085	0.0553	3.00833	0.1778	3.00833	0.1805	3.00867	0.23895	3.00833	0.22205
3.01683	0.0536	3.01667	0.17575	3.01667	0.1775	3.017	0.23365	3.01667	0.21915
3.02517	0.05445	3.025	0.1728	3.025	0.1764	3.02533	0.2315	3.025	0.21695
3.0335	0.052	3.03333	0.1709	3.03333	0.17405	3.03367	0.2281	3.03333	0.2131
3.04183	0.05315	3.04167	0.16935	3.04167	0.17285	3.042	0.22655	3.04167	0.2096
3.05017	0.0531	3.05	0.1686	3.05	0.1683	3.05033	0.2238	3.05	0.20485
3.0585	0.05215	3.05833	0.16655	3.05833	0.166	3.05867	0.2205	3.05833	0.20185
3.06683	0.05005	3.06667	0.16645	3.06667	0.16425	3.067	0.2184	3.06667	0.19865
3.07517	0.04865	3.075	0.16345	3.075	0.1614	3.07533	0.214	3.075	0.1935
3.0835	0.0483	3.08333	0.16275	3.08333	0.15825	3.08367	0.2139	3.08333	0.19055
3.09183	0.0462	3.09167	0.1592	3.09167	0.155	3.092	0.20815	3.09167	0.1857
3.10017	0.04625	3.1	0.15985	3.1	0.15335	3.10033	0.2071	3.1	0.1826
3.1085	0.04355	3.10833	0.1552	3.10833	0.1484	3.10867	0.20275	3.10833	0.17745
3.11683	0.04265	3.11667	0.15345	3.11667	0.1482	3.117	0.2004	3.11667	0.1757
3.12517	0.04235	3.125	0.1522	3.125	0.1463	3.12533	0.19665	3.125	0.1739
3.1335	0.04145	3.13333	0.1496	3.13333	0.14245	3.13367	0.19395	3.13333	0.17025
3.14183	0.0398	3.14167	0.14715	3.14167	0.13905	3.142	0.1916	3.14167	0.16695
3.15017	0.03765	3.15	0.14485	3.15	0.13715	3.15033	0.18995	3.15	0.1652
3.1585	0.03875	3.15833	0.1451	3.15833	0.13605	3.15867	0.1876	3.15833	0.16325
3.16683	0.0386	3.16667	0.14455	3.16667	0.13485	3.167	0.1857	3.16667	0.1619
3.17517	0.0372	3.175	0.14095	3.175	0.1328	3.17533	0.18365	3.175	0.1592
3.1835	0.03685	3.18333	0.14105	3.18333	0.1324	3.18367	0.1819	3.18333	0.15815
3.19183	0.03495	3.19167	0.14035	3.19167	0.12955	3.192	0.1796	3.19167	0.1555
3.20017	0.03405	3.2	0.13835	3.2	0.1288	3.20033	0.17865	3.2	0.15205
3.2085	0.0356	3.20833	0.13805	3.20833	0.12645	3.20867	0.17645	3.20833	0.1514
3.21683	0.03445	3.21667	0.13875	3.21667	0.12575	3.217	0.17645	3.21667	0.1514
3.22517	0.03295	3.225	0.13775	3.225	0.12435	3.22533	0.17505	3.225	0.14955
3.2335	0.03115	3.23333	0.1348	3.23333	0.12045	3.23367	0.17145	3.23333	0.14545
3.24183	0.032	3.24167	0.1349	3.24167	0.1193	3.242	0.1686	3.24167	0.14475
3.25017	0.02895	3.25	0.13155	3.25	0.11755	3.25033	0.16615	3.25	0.14255
3.2585	0.02925	3.25833	0.13275	3.25833	0.1184	3.25867	0.16945	3.25833	0.1396
3.26683	0.0292	3.26667	0.1323	3.26667	0.11995	3.267	0.16915	3.26667	0.1377
3.27517	0.02865	3.275	0.1347	3.275	0.11895	3.27533	0.1699	3.275	0.1371
3.2835	0.02595	3.28333	0.13295	3.28333	0.1172	3.28367	0.16675	3.28333	0.13475
3.29183	0.02725	3.29167	0.13185	3.29167	0.11565	3.292	0.16635	3.29167	0.1369
3.30017	0.02665	3.3	0.1298	3.3	0.1152	3.30033	0.16375	3.3	0.1379
3.3085	0.0274	3.30833	0.1298	3.30833	0.11485	3.30867	0.16365	3.30833	0.1373
3.31683	0.0256	3.31667	0.1287	3.31667	0.11275	3.317	0.1624	3.31667	0.1362
3.32517	0.0248	3.325	0.12505	3.325	0.1107	3.32533	0.1618	3.325	0.13385
3.3335	0.0246	3.33333	0.12525	3.33333	0.1122	3.33367	0.16205	3.33333	0.1346
3.34183	0.02355	3.34167	0.1255	3.34167	0.11135	3.342	0.1606	3.34167	0.13515
3.35017	0.02365	3.35	0.1267	3.35	0.1125	3.35033	0.1607	3.35	0.13615
3.3585	0.0257	3.35833	0.12675	3.35833	0.1161	3.35867	0.16185	3.35833	0.13845
3.36683	0.02485	3.36667	0.12795	3.36667	0.1173	3.367	0.16375	3.36667	0.1401
3.37517	0.02565	3.375	0.1281	3.375	0.12055	3.37533	0.1635	3.375	0.14405
3.3835	0.028	3.38333	0.13105	3.38333	0.1222	3.38367	0.16695	3.38333	0.1472
3.39183	0.03135	3.39167	0.1326	3.39167	0.12685	3.392	0.16945	3.39167	0.1512
3.40017	0.0334	3.4	0.13625	3.4	0.1315	3.40033	0.1728	3.4	0.1558
3.4085	0.03465	3.40833	0.13695	3.40833	0.1339	3.40867	0.17585	3.40833	0.1576
3.41683	0.03575	3.41667	0.1396	3.41667	0.13765	3.417	0.1788	3.41667	0.15745
3.42517	0.03495	3.425	0.13915	3.425	0.1407	3.42533	0.17995	3.425	0.15675
3.4335	0.0362	3.43333	0.1393	3.43333	0.1417	3.43367	0.1812	3.43333	0.15625
3.44183	0.03465	3.44167	0.14195	3.44167	0.1427	3.442	0.1827	3.44167	0.1547
3.45017	0.03465	3.45	0.14285	3.45	0.14325	3.45033	0.18285	3.45	0.15355
3.4585	0.03555	3.45833	0.1439	3.45833	0.1437	3.45867	0.18285	3.45833	0.1514
3.46683	0.03835	3.46667	0.14605	3.46667	0.1456	3.467	0.18455	3.46667	0.15205
3.47517	0.03885	3.475	0.14615	3.475	0.14625	3.47533	0.18675	3.475	0.1505
3.4835	0.03965	3.48333	0.14695	3.48333	0.14685	3.48367	0.1843	3.48333	0.1485
3.49183	0.03785	3.49167	0.14585	3.49167	0.1456	3.492	0.1831	3.49167	0.1467
3.50017	0.038	3.5	0.14605	3.5	0.1458	3.50033	0.18255	3.5	0.14565
3.5085	0.03665	3.50833	0.1465	3.50833	0.14485	3.50867	0.1835	3.50833	0.1439
3.51683	0.0352	3.51667	0.1456	3.51667	0.1424	3.517	0.17835	3.51667	0.142
3.52517	0.0344	3.525	0.14415	3.525	0.1443	3.52533	0.1785	3.525	0.1413
3.5335	0.03475	3.53333	0.1457	3.53333	0.14415	3.53367	0.1793	3.53333	0.1415
3.54183	0.03355	3.54167	0.14585	3.54167	0.14195	3.542	0.17875	3.54167	0.13905
3.55017	0.03065	3.55	0.142	3.55	0.14095	3.55033	0.1765	3.55	0.1352
3.5585	0.03045	3.55833	0.14255	3.55833	0.14015	3.55867	0.1754	3.55833	0.13595
3.56683	0.02895	3.56667	0.1396	3.56667	0.1378	3.567	0.1727	3.56667	0.1339
3.57517	0.0298	3.575	0.1408	3.575	0.13775	3.57533	0.17285	3.575	0.13365
3.5835	0.0307	3.58333	0.13965	3.58333	0.1384	3.58367	0.17215	3.58333	0.134
3.59183	0.0303	3.59167	0.1411	3.59167	0.1372	3.592	0.17145	3.59167	0.132
3.60017	0.0287	3.6	0.1395	3.6	0.1371	3.60033	0.17125	3.6	0.1315
3.6085	0.02935	3.60833	0.1401	3.60833	0.1359	3.60867	0.17125	3.60833	0.1306
3.61683	0.0311	3.61667	0.1388	3.61667	0.13515	3.617	0.17065	3.61667	0.12945
3.62517	0.0299	3.625	0.1377	3.625	0.1353	3.62533	0.16985	3.625	0.1292
3.6335	0.0291	3.63333	0.13825	3.63333	0.1344	3.63367	0.1682	3.63333	0.1279
3.64183	0.0291	3.64167	0.13885	3.64167	0.13475	3.642	0.16995	3.64167	0.12765
3.65017	0.02955	3.65	0.1379	3.65	0.13355	3.65033	0.16825	3.65	0.1286
3.6585	0.02845	3.65833	0.13745	3.65833	0.1337	3.65867	0.1686	3.65833	0.12675
3.66683	0.02985	3.66667	0.13775	3.66667	0.13445	3.667	0.16825	3.66667	0.12685
3.67517	0.0297	3.675	0.13695	3.675	0.13225	3.67533	0.16575	3.675	0.12555
3.6835	0.0282	3.68333	0.1365	3.68333	0.1327	3.68367	0.16595	3.68333	0.1246
3.69183	0.02965	3.69167	0.1369	3.69167	0.1328	3.692	0.16555	3.69167	0.1252
3.70017	0.0292	3.7	0.1378	3.7	0.13085	3.70033	0.1658	3.7	0.12425
3.7085	0.02785	3.70833	0.13595	3.70833	0.13185	3.70867	0.165	3.70833	0.12315
3.71683	0.02675	3.71667	0.13505	3.71667	0.1313	3.717	0.1647	3.71667	0.1239
3.72517	0.02715	3.725	0.1365	3.725	0.1303	3.72533	0.16335	3.725	0.1229
3.7335	0.0257	3.73333	0.13565	3.73333	0.13065	3.73367	0.1636	3.73333	0.1218
3.74183	0.0258	3.74167	0.134	3.74167	0.1301	3.742	0.16135	3.74167	0.12195
3.75017	0.0257	3.75	0.1357	3.75	0.13145	3.75033	0.16205	3.75	0.1236
3.7585	0.02435	3.75833	0.1341	3.75833	0.12895	3.75867	0.16	3.75833	0.1194
3.76683	0.0256	3.76667	0.1346	3.76667	0.1286	3.767	0.1611	3.76667	0.12165
3.77517	0.0251	3.775	0.13415	3.775	0.12815	3.77533	0.16215	3.775	0.1223
3.7835	0.0249	3.78333	0.13355	3.78333	0.12945	3.78367	0.16195	3.78333	0.12145
3.79183	0.0242	3.79167	0.13245	3.79167	0.12875	3.792	0.16085	3.79167	0.12095
3.80017	0.02605	3.8	0.13235	3.8	0.12925	3.80033	0.1602	3.8	0.1201
3.8085	0.02505	3.80833	0.1316	3.80833	0.12725	3.80867	0.1608	3.80833	0.12015
3.81683	0.02505	3.81667	0.1315	3.81667	0.127	3.817	0.1602	3.81667	0.1193
3.82517	0.0242	3.825	0.13015	3.825	0.1265	3.82533	0.15965	3.825	0.1179
3.8335	0.02575	3.83333	0.13055	3.83333	0.1269	3.83367	0.1594	3.83333	0.11775
3.84183	0.02475	3.84167	0.1287	3.84167	0.12545	3.842	0.15735	3.84167	0.1171
3.85017	0.02435	3.85	0.1277	3.85	0.1241	3.85033	0.15695	3.85	0.1158
3.8585	0.0248	3.85833	0.1276	3.85833	0.12375	3.85867	0.15675	3.85833	0.1151
3.86683	0.0231	3.86667	0.1288	3.86667	0.1256	3.867	0.15635	3.86667	0.11445
3.87517	0.02275	3.875	0.1267	3.875	0.1234	3.87533	0.15385	3.875	0.113
3.8835	0.0213	3.88333	0.1247	3.88333	0.1221	3.88367	0.1536	3.88333	0.11135
3.89183	0.0231	3.89167	0.1257	3.89167	0.12265	3.892	0.1529	3.89167	0.11105
3.90017	0.02315	3.9	0.1271	3.9	0.12485	3.90033	0.1552	3.9	0.11305
3.9085	0.02265	3.90833	0.1263	3.90833	0.1219	3.90867	0.1531	3.90833	0.1117
3.91683	0.0212	3.91667	0.12445	3.91667	0.1216	3.917	0.15335	3.91667	0.10845
3.92517	0.02135	3.925	0.1245	3.925	0.12215	3.92533	0.15245	3.925	0.10645
3.9335	0.02065	3.93333	0.1229	3.93333	0.12005	3.93367	0.1515	3.93333	0.10665
3.94183	0.02055	3.94167	0.1226	3.94167	0.11985	3.942	0.1508	3.94167	0.1061
3.95017	0.01915	3.95	0.12265	3.95	0.1191	3.95033	0.14905	3.95	0.10575
3.9585	0.02115	3.95833	0.1222	3.95833	0.1199	3.95867	0.1499	3.95833	0.10565
3.96683	0.02045	3.96667	0.123	3.96667	0.11885	3.967	0.14825	3.96667	0.10555
3.97517	0.02055	3.975	0.12315	3.975	0.1182	3.97533	0.14785	3.975	0.1035
3.9835	0.0197	3.98333	0.1235	3.98333	0.11795	3.98367	0.1476	3.98333	0.10405
3.99183	0.02245	3.99167	0.12265	3.99167	0.11685	3.992	0.14665	3.99167	0.10445
4.00017	0.02095	4	0.12285	4	0.1165	4.00033	0.14525	4	0.1029
4.0085	0.02015	4.00833	0.1236	4.00833	0.1156	4.00867	0.14655	4.00833	0.1023
4.01683	0.02045	4.01667	0.1236	4.01667	0.11645	4.017	0.146	4.01667	0.1043
4.02517	0.01965	4.025	0.12275	4.025	0.1147	4.02533	0.14505	4.025	0.1032
4.0335	0.0174	4.03333	0.1202	4.03333	0.1138	4.03367	0.14495	4.03333	0.10045
4.04183	0.01845	4.04167	0.12135	4.04167	0.11445	4.042	0.1438	4.04167	0.10135
4.05017	0.01845	4.05	0.1211	4.05	0.1141	4.05033	0.14355	4.05	0.1004
4.0585	0.019	4.05833	0.1209	4.05833	0.1129	4.05867	0.1436	4.05833	0.1
4.06683	0.02035	4.06667	0.12175	4.06667	0.11405	4.067	0.1435	4.06667	0.10045
4.07517	0.01835	4.075	0.12025	4.075	0.1121	4.07533	0.142	4.075	0.09935
4.0835	0.0184	4.08333	0.11975	4.08333	0.1119	4.08367	0.14155	4.08333	0.09805
4.09183	0.01795	4.09167	0.1201	4.09167	0.1132	4.092	0.14205	4.09167	0.09795
4.10017	0.01895	4.1	0.1218	4.1	0.11385	4.10033	0.14265	4.1	0.10035
4.1085	0.01795	4.10833	0.118	4.10833	0.11295	4.10867	0.1411	4.10833	0.0965
4.11683	0.01675	4.11667	0.1168	4.11667	0.11165	4.117	0.13895	4.11667	0.0954
4.12517	0.01755	4.125	0.1163	4.125	0.11405	4.12533	0.1418	4.125	0.0965
4.1335	0.0164	4.13333	0.1157	4.13333	0.1118	4.13367	0.1403	4.13333	0.09485
4.14183	0.01475	4.14167	0.1135	4.14167	0.11005	4.142	0.13795	4.14167	0.09365
4.15017	0.01625	4.15	0.1166	4.15	0.11035	4.15033	0.13885	4.15	0.09475
4.1585	0.0167	4.15833	0.11765	4.15833	0.11165	4.15867	0.1393	4.15833	0.09605
4.16683	0.0164	4.16667	0.11775	4.16667	0.11025	4.167	0.1396	4.16667	0.09455
4.17517	0.01655	4.175	0.11705	4.175	0.1103	4.17533	0.1382	4.175	0.09415
4.1835	0.01655	4.18333	0.11805	4.18333	0.11	4.18367	0.13615	4.18333	0.09335
4.19183	0.0156	4.19167	0.11745	4.19167	0.1086	4.192	0.13695	4.19167	0.09235
4.20017	0.0164	4.2	0.11755	4.2	0.1084	4.20033	0.13805	4.2	0.09355
4.2085	0.0157	4.20833	0.11635	4.20833	0.1082	4.20867	0.13645	4.20833	0.0934
4.21683	0.01515	4.21667	0.1155	4.21667	0.1074	4.217	0.135	4.21667	0.09185
4.22517	0.0139	4.225	0.1145	4.225	0.1061	4.22533	0.13455	4.225	0.09065
4.2335	0.01545	4.23333	0.1148	4.23333	0.106	4.23367	0.13505	4.23333	0.0903
4.24183	0.01365	4.24167	0.112	4.24167	0.10535	4.242	0.13335	4.24167	0.08845
4.25017	0.01455	4.25	0.11275	4.25	0.1064	4.25033	0.13395	4.25	0.09005
4.2585	0.0134	4.25833	0.11065	4.25833	0.10435	4.25867	0.13225	4.25833	0.089
4.26683	0.0114	4.26667	0.1104	4.26667	0.1032	4.267	0.1327	4.26667	0.08825
4.27517	0.01385	4.275	0.1143	4.275	0.1059	4.27533	0.1335	4.275	0.0915
4.2835	0.02045	4.28333	0.1184	4.28333	0.11125	4.28367	0.1401	4.28333	0.09805
4.29183	0.0517	4.29167	0.15095	4.29167	0.14445	4.292	0.1722	4.29167	0.1293
4.30017	0.01225	4.3	0.11115	4.3	0.106	4.30033	0.13425	4.3	0.08845
4.3085	0.0158	4.30833	0.11495	4.30833	0.1082	4.30867	0.13595	4.30833	0.09245
4.31683	0.0131	4.31667	0.1127	4.31667	0.10645	4.317	0.1344	4.31667	0.0911
4.32517	0.0138	4.325	0.11335	4.325	0.1057	4.32533	0.1352	4.325	0.0914
4.3335	0.01235	4.33333	0.1117	4.33333	0.10475	4.33367	0.1328	4.33333	0.09045
4.34183	0.0109	4.34167	0.1116	4.34167	0.10335	4.342	0.13145	4.34167	0.09015
4.35017	0.0116	4.35	0.11145	4.35	0.10465	4.35033	0.13315	4.35	0.0911
4.3585	0.01055	4.35833	0.1115	4.35833	0.10445	4.35867	0.1325	4.35833	0.08945
4.36683	0.01255	4.36667	0.1102	4.36667	0.1044	4.367	0.1329	4.36667	0.08935
4.37517	0.0109	4.375	0.1091	4.375	0.10325	4.37533	0.13105	4.375	0.09005
4.3835	0.0108	4.38333	0.10895	4.38333	0.104	4.38367	0.13235	4.38333	0.09095
4.39183	0.00935	4.39167	0.11015	4.39167	0.10275	4.392	0.132	4.39167	0.0916
4.40017	0.0104	4.4	0.1096	4.4	0.10255	4.40033	0.1332	4.4	0.09235
4.4085	0.0098	4.40833	0.1096	4.40833	0.1024	4.40867	0.1325	4.40833	0.09135
4.41683	0.0094	4.41667	0.10795	4.41667	0.10145	4.417	0.1331	4.41667	0.0896
4.42517	0.0101	4.425	0.10655	4.425	0.10115	4.42533	0.13195	4.425	0.08895
4.4335	0.0107	4.43333	0.1077	4.43333	0.10275	4.43367	0.1323	4.43333	0.0899
4.44183	0.01045	4.44167	0.1075	4.44167	0.10155	4.442	0.13185	4.44167	0.08965
4.45017	0.0082	4.45	0.1067	4.45	0.10005	4.45033	0.12965	4.45	0.0878
4.4585	0.00775	4.45833	0.10595	4.45833	0.10045	4.45867	0.13045	4.45833	0.08835
4.46683	0.0086	4.46667	0.10695	4.46667	0.0992	4.467	0.13015	4.46667	0.08715
4.47517	0.00705	4.475	0.10685	4.475	0.0997	4.47533	0.1287	4.475	0.0865
4.4835	0.0082	4.48333	0.10625	4.48333	0.0993	4.48367	0.12835	4.48333	0.0853
4.49183	0.00835	4.49167	0.1053	4.49167	0.0994	4.492	0.1281	4.49167	0.08485
4.50017	0.00675	4.5	0.1053	4.5	0.0979	4.50033	0.1266	4.5	0.0841
4.5085	0.0042	4.50833	0.1031	4.50833	0.09665	4.50867	0.12555	4.50833	0.0827
4.51683	0.00525	4.51667	0.10395	4.51667	0.09645	4.517	0.1248	4.51667	0.08225
4.52517	0.00515	4.525	0.10405	4.525	0.09575	4.52533	0.1239	4.525	0.08215
4.5335	0.0057	4.53333	0.1034	4.53333	0.0957	4.53367	0.124	4.53333	0.08035
4.54183	0.0051	4.54167	0.1038	4.54167	0.0951	4.542	0.1257	4.54167	0.08225
4.55017	0.0065	4.55	0.10235	4.55	0.0945	4.55033	0.12325	4.55	0.07995
4.5585	0.00565	4.55833	0.1021	4.55833	0.0944	4.55867	0.1232	4.55833	0.0803
4.56683	0.00435	4.56667	0.10295	4.56667	0.09355	4.567	0.12245	4.56667	0.08015
4.57517	0.0036	4.575	0.10385	4.575	0.0948	4.57533	0.1227	4.575	0.0797
4.5835	0.00545	4.58333	0.1034	4.58333	0.0931	4.58367	0.1227	4.58333	0.07965
4.59183	0.00545	4.59167	0.10265	4.59167	0.0921	4.592	0.12205	4.59167	0.07805
4.60017	0.00425	4.6	0.1018	4.6	0.09135	4.60033	0.12115	4.6	0.0775
4.6085	0.004	4.60833	0.10065	4.60833	0.09115	4.60867	0.12105	4.60833	0.07735
4.61683	0.00505	4.61667	0.1022	4.61667	0.09245	4.617	0.1222	4.61667	0.07715
4.62517	0.00465	4.625	0.1012	4.625	0.09245	4.62533	0.1202	4.625	0.0769
4.6335	0.0046	4.63333	0.1017	4.63333	0.0905	4.63367	0.1212	4.63333	0.0757
4.64183	0.0028	4.64167	0.0994	4.64167	0.08925	4.642	0.11925	4.64167	0.07425
4.65017	0.00425	4.65	0.101	4.65	0.08935	4.65033	0.12005	4.65	0.0759
4.6585	0.0039	4.65833	0.1007	4.65833	0.0899	4.65867	0.11935	4.65833	0.07675
4.66683	0.0018	4.66667	0.09755	4.66667	0.08965	4.667	0.1184	4.66667	0.07415
4.67517	0.00175	4.675	0.09705	4.675	0.0876	4.67533	0.1169	4.675	0.07435
4.6835	0.00175	4.68333	0.09735	4.68333	0.0884	4.68367	0.1183	4.68333	0.0743
4.69183	0.00185	4.69167	0.09855	4.69167	0.08765	4.692	0.11625	4.69167	0.0742
4.70017	0.0016	4.7	0.09795	4.7	0.087	4.70033	0.11695	4.7	0.07265
4.7085	0.0001	4.70833	0.09695	4.70833	0.0857	4.70867	0.1141	4.70833	0.07335
4.71683	0.00125	4.71667	0.09755	4.71667	0.08705	4.717	0.1161	4.71667	0.07445
4.72517	0.0017	4.725	0.09805	4.725	0.08575	4.72533	0.1162	4.725	0.07445
4.7335	0.0019	4.73333	0.0978	4.73333	0.0867	4.73367	0.11745	4.73333	0.07355
4.74183	0.00285	4.74167	0.0981	4.74167	0.0856	4.742	0.1174	4.74167	0.07405
4.75017	0.0033	4.75	0.0978	4.75	0.08705	4.75033	0.1182	4.75	0.0746
4.7585	0.00095	4.75833	0.0973	4.75833	0.0869	4.75867	0.11765	4.75833	0.0755
4.76683	0.0018	4.76667	0.09595	4.76667	0.08665	4.767	0.1182	4.76667	0.07395
4.77517	0.0015	4.775	0.09595	4.775	0.08635	4.77533	0.1172	4.775	0.0745
4.7835	0	4.78333	0.0966	4.78333	0.0846	4.78367	0.11655	4.78333	0.07195
4.79183	-0.0004	4.79167	0.0949	4.79167	0.0849	4.792	0.11615	4.79167	0.07295
4.80017	0.00165	4.8	0.0976	4.8	0.08685	4.80033	0.117	4.8	0.07475
4.8085	0.001	4.80833	0.09745	4.80833	0.0854	4.80867	0.117	4.80833	0.07325
4.81683	0.00045	4.81667	0.0972	4.81667	0.0848	4.817	0.1171	4.81667	0.07405
4.82517	-0.0009	4.825	0.096	4.825	0.0835	4.82533	0.1135	4.825	0.07215
4.8335	-0.00115	4.83333	0.09595	4.83333	0.08445	4.83367	0.11415	4.83333	0.073
4.84183	-0.0002	4.84167	0.09685	4.84167	0.0851	4.842	0.1146	4.84167	0.0742
4.85017	5e-05	4.85	0.09595	4.85	0.08415	4.85033	0.1145	4.85	0.07475
4.8585	-0.00115	4.85833	0.0956	4.85833	0.0853	4.85867	0.1138	4.85833	0.0721
4.86683	-0.00115	4.86667	0.0935	4.86667	0.08505	4.867	0.1119	4.86667	0.0726
4.87517	-0.0025	4.875	0.0935	4.875	0.0837	4.87533	0.11255	4.875	0.07275
4.8835	0.00155	4.88333	0.09595	4.88333	0.0866	4.88367	0.1137	4.88333	0.07495
4.89183	0.01195	4.89167	0.1062	4.89167	0.0969	4.892	0.1244	4.89167	0.0858
4.90017	-0.0009	4.9	0.09375	4.9	0.08305	4.90033	0.11095	4.9	0.0732
4.9085	-0.01665	4.90833	0.0777	4.90833	0.0683	4.90867	0.0961	4.90833	0.057
4.91683	-0.01345	4.91667	0.08185	4.91667	0.0723	4.917	0.10045	4.91667	0.06145
4.92517	0.0034	4.925	0.09725	4.925	0.08935	4.92533	0.11655	4.925	0.0775
4.9335	-0.00035	4.93333	0.09345	4.93333	0.0847	4.93367	0.11265	4.93333	0.0744
4.94183	-0.0017	4.94167	0.0908	4.94167	0.0839	4.942	0.11115	4.94167	0.0737
4.95017	-0.0018	4.95	0.09225	4.95	0.08315	4.95033	0.11225	4.95	0.07335
4.9585	-0.0007	4.95833	0.09315	4.95833	0.0828	4.95867	0.1127	4.95833	0.07395
4.96683	-0.00225	4.96667	0.0922	4.96667	0.0816	4.967	0.11155	4.96667	0.0739
4.97517	-0.0027	4.975	0.0923	4.975	0.08095	4.97533	0.11235	4.975	0.07285
4.9835	-0.00395	4.98333	0.0896	4.98333	0.0806	4.98367	0.11045	4.98333	0.0726
4.99183	-0.0019	4.99167	0.09195	4.99167	0.0827	4.992	0.1108	4.99167	0.07365
5.00017	-0.0018	5	0.0925	5	0.0835	5.00033	0.1118	5	0.0757
5.0085	-0.00125	5.00833	0.09235	5.00833	0.08205	5.00867	0.11135	5.00833	0.0753
5.01683	-0.0027	5.01667	0.09215	5.01667	0.08245	5.017	0.11095	5.01667	0.07415
5.02517	-0.00205	5.025	0.0931	5.025	0.0829	5.02533	0.11245	5.025	0.0754
5.0335	-0.0015	5.03333	0.09355	5.03333	0.0828	5.03367	0.11335	5.03333	0.07545
5.04183	-0.0013	5.04167	0.09255	5.04167	0.0834	5.042	0.11195	5.04167	0.07425
5.05017	-0.00315	5.05	0.0916	5.05	0.0821	5.05033	0.11245	5.05	0.07375
5.0585	-0.00125	5.05833	0.0908	5.05833	0.0826	5.05867	0.1125	5.05833	0.07485
5.06683	-0.0029	5.06667	0.09125	5.06667	0.08165	5.067	0.1126	5.06667	0.0741
5.07517	-0.00285	5.075	0.0903	5.075	0.07995	5.07533	0.112	5.075	0.07375
5.0835	-0.00305	5.08333	0.0893	5.08333	0.0808	5.08367	0.11165	5.08333	0.07445
5.09183	-0.0039	5.09167	0.08945	5.09167	0.07945	5.092	0.1119	5.09167	0.0765
5.10017	-0.0036	5.1	0.0893	5.1	0.0805	5.10033	0.11245	5.1	0.078
5.1085	-0.00325	5.10833	0.0894	5.10833	0.0808	5.10867	0.1152	5.10833	0.0802
5.11683	-0.0025	5.11667	0.08845	5.11667	0.07865	5.117	0.11535	5.11667	0.0806
5.12517	-0.00385	5.125	0.0882	5.125	0.07865	5.12533	0.1157	5.125	0.0817
5.1335	-0.0039	5.13333	0.0883	5.13333	0.0794	5.13367	0.1174	5.13333	0.085
5.14183	-0.00405	5.14167	0.08805	5.14167	0.0774	5.142	0.1195	5.14167	0.0851
5.15017	-0.0038	5.15	0.08885	5.15	0.07775	5.15033	0.1212	5.15	0.08795
5.1585	-0.0039	5.15833	0.08815	5.15833	0.0765	5.15867	0.1233	5.15833	0.0896
5.16683	-0.00345	5.16667	0.08795	5.16667	0.0784	5.167	0.125	5.16667	0.09065
5.17517	-0.00465	5.175	0.0866	5.175	0.07815	5.17533	0.1259	5.175	0.0904
5.1835	-0.00425	5.18333	0.08795	5.18333	0.0786	5.18367	0.12645	5.18333	0.0924
5.19183	-0.00535	5.19167	0.08605	5.19167	0.07675	5.192	0.12735	5.19167	0.0918
5.20017	-0.00595	5.2	0.08575	5.2	0.07845	5.20033	0.1278	5.2	0.0931
5.2085	-0.00525	5.20833	0.0871	5.20833	0.079	5.20867	0.1292	5.20833	0.09475
5.21683	-0.0053	5.21667	0.08715	5.21667	0.08065	5.217	0.12995	5.21667	0.09875
5.22517	-0.00505	5.225	0.08805	5.225	0.08145	5.22533	0.1303	5.225	0.10155
5.2335	-0.00565	5.23333	0.08835	5.23333	0.08355	5.23367	0.13125	5.23333	0.10545
5.24183	-0.00495	5.24167	0.0874	5.24167	0.08555	5.242	0.13155	5.24167	0.1101
5.25017	-0.00485	5.25	0.08905	5.25	0.08725	5.25033	0.13285	5.25	0.1165
5.2585	-0.00565	5.25833	0.08835	5.25833	0.08815	5.25867	0.1319	5.25833	0.1209
5.26683	-0.0055	5.26667	0.0887	5.26667	0.09005	5.267	0.1337	5.26667	0.12955
5.27517	-0.0029	5.275	0.0913	5.275	0.09475	5.27533	0.1362	5.275	0.139
5.2835	-0.0028	5.28333	0.09015	5.28333	0.0976	5.28367	0.13985	5.28333	0.1524
5.29183	-0.00235	5.29167	0.09345	5.29167	0.10115	5.292	0.1447	5.29167	0.17065
5.30017	-0.0012	5.3	0.0941	5.3	0.1066	5.30033	0.14935	5.3	0.19685
5.3085	0.0001	5.30833	0.0964	5.30833	0.11115	5.30867	0.15655	5.30833	0.234
5.31683	-0.00035	5.31667	0.0986	5.31667	0.11835	5.317	0.16715	5.31667	0.28435
5.32517	0.00065	5.325	0.1025	5.325	0.13075	5.32533	0.18565	5.325	0.3515
5.3335	0.0015	5.33333	0.10535	5.33333	0.1463	5.33367	0.20775	5.33333	0.43135
5.34183	0.00435	5.34167	0.1117	5.34167	0.1686	5.342	0.24255	5.34167	0.52115
5.35017	0.00505	5.35	0.11835	5.35	0.19725	5.35033	0.28725	5.35	0.6172
5.3585	0.00695	5.35833	0.1281	5.35833	0.2291	5.35867	0.3381	5.35833	0.70825
5.36683	0.00785	5.36667	0.1386	5.36667	0.2657	5.367	0.39485	5.36667	0.78865
5.37517	0.01055	5.375	0.1535	5.375	0.2995	5.37533	0.45455	5.375	0.85005
5.3835	0.0123	5.38333	0.16755	5.38333	0.3306	5.38367	0.5134	5.38333	0.89075
5.39183	0.0124	5.39167	0.17955	5.39167	0.35745	5.392	0.5614	5.39167	0.9039
5.40017	0.01255	5.4	0.1923	5.4	0.37655	5.40033	0.6008	5.4	0.8978
5.4085	0.0133	5.40833	0.20395	5.40833	0.3858	5.40867	0.62475	5.40833	0.87435
5.41683	0.0129	5.41667	0.21075	5.41667	0.3851	5.417	0.6334	5.41667	0.8358
5.42517	0.0115	5.425	0.2147	5.425	0.3779	5.42533	0.6316	5.425	0.79465
5.4335	0.01065	5.43333	0.21405	5.43333	0.3641	5.43367	0.6177	5.43333	0.7611
5.44183	0.00825	5.44167	0.21055	5.44167	0.3422	5.442	0.59855	5.44167	0.7386
5.45017	0.00555	5.45	0.2033	5.45	0.31785	5.45033	0.57835	5.45	0.74575
5.4585	0.0038	5.45833	0.19565	5.45833	0.29525	5.45867	0.56825	5.45833	0.80095
5.46683	0.0014	5.46667	0.1865	5.46667	0.26985	5.467	0.5738	5.46667	0.9191
5.47517	0.0016	5.475	0.1779	5.475	0.24855	5.47533	0.60915	5.475	1.1292
5.4835	0.0017	5.48333	0.1668	5.48333	0.23035	5.48367	0.68915	5.48333	1.46295
5.49183	0.0007	5.49167	0.1582	5.49167	0.21105	5.492	0.832	5.49167	1.9556
5.50017	-0.0016	5.5	0.14995	5.5	0.19905	5.50033	1.07035	5.5	2.64085
5.5085	-0.00515	5.50833	0.1407	5.50833	0.18865	5.50867	1.43385	5.50833	3.5459
5.51683	-0.00375	5.51667	0.1345	5.51667	0.1863	5.517	1.9607	5.51667	4.6953
5.52517	-0.00285	5.525	0.1291	5.525	0.18615	5.52533	2.68905	5.525	6.08085
5.5335	-0.003	5.53333	0.12475	5.53333	0.1909	5.53367	3.6507	5.53333	7.6822
5.54183	-0.00115	5.54167	0.11995	5.54167	0.2055	5.542	4.87165	5.54167	9.45645
5.55017	-0.0002	5.55	0.11535	5.55	0.2258	5.55033	6.3496	5.55	11.3375
5.5585	0.00355	5.55833	0.115	5.55833	0.2572	5.55867	8.06975	5.55833	13.2568
5.56683	0.0035	5.56667	0.11125	5.56667	0.29945	5.567	9.97655	5.56667	15.1364
5.57517	0.00505	5.575	0.1089	5.575	0.36435	5.57533	12.0038	5.575	16.9203
5.5835	0.00805	5.58333	0.10635	5.58333	0.45585	5.58367	14.0586	5.58333	18.5591
5.59183	0.0137	5.59167	0.10595	5.59167	0.59305	5.592	16.0567	5.59167	20.0332
5.60017	0.01545	5.6	0.1069	5.6	0.7916	5.60033	17.9039	5.6	21.3315
5.6085	0.0202	5.60833	0.10685	5.60833	1.08105	5.60867	19.534	5.60833	22.4704
5.61683	0.0213	5.61667	0.10405	5.61667	1.4906	5.617	20.8885	5.61667	23.4615
5.62517	0.0253	5.625	0.107	5.625	2.0638	5.62533	21.9374	5.625	24.3388
5.6335	0.02875	5.63333	0.107	5.63333	2.8347	5.63367	22.6651	5.63333	25.1215
5.64183	0.0327	5.64167	0.1086	5.64167	3.8367	5.642	23.0721	5.64167	25.8281
5.65017	0.03695	5.65	0.11015	5.65	5.09275	5.65033	23.1711	5.65	26.4625
5.6585	0.0371	5.65833	0.1109	5.65833	6.59575	5.65867	22.9754	5.65833	27.02
5.66683	0.0385	5.66667	0.11165	5.66667	8.3244	5.667	22.5185	5.66667	27.4917
5.67517	0.03895	5.675	0.11145	5.675	10.2255	5.67533	21.832	5.675	27.8536
5.6835	0.0421	5.68333	0.1137	5.68333	12.2243	5.68367	20.9467	5.68333	28.0834
5.69183	0.04215	5.69167	0.11635	5.69167	14.2272	5.692	19.8937	5.69167	28.162
5.70017	0.04415	5.7	0.1194	5.7	16.1527	5.70033	18.7181	5.7	28.0726
5.7085	0.0461	5.70833	0.1234	5.70833	17.9082	5.70867	17.4555	5.70833	27.8084
5.71683	0.0463	5.71667	0.12725	5.71667	19.4245	5.717	16.1417	5.71667	27.3629
5.72517	0.04635	5.725	0.1323	5.725	20.6566	5.72533	14.808	5.725	26.7505
5.7335	0.04745	5.73333	0.1387	5.73333	21.5738	5.73367	13.4914	5.73333	25.9922
5.74183	0.04915	5.74167	0.1513	5.74167	22.1647	5.742	12.2126	5.74167	25.1232
5.75017	0.04735	5.75	0.16875	5.75	22.4306	5.75033	10.9885	5.75	24.1909
5.7585	0.04585	5.75833	0.19655	5.75833	22.3832	5.75867	9.83545	5.75833	23.2535
5.76683	0.04345	5.76667	0.24735	5.76667	22.0463	5.767	8.76895	5.76667	22.3729
5.77517	0.0413	5.775	0.3323	5.775	21.453	5.77533	7.78895	5.775	21.6164
5.7835	0.03865	5.78333	0.47395	5.78333	20.6371	5.78367	6.90555	5.78333	21.0482
5.79183	0.03625	5.79167	0.69725	5.79167	19.6355	5.792	6.11215	5.79167	20.7152
5.80017	0.0344	5.8	1.0416	5.8	18.4918	5.80033	5.4088	5.8	20.6427
5.8085	0.0336	5.80833	1.5481	5.80833	17.2495	5.80867	4.7876	5.80833	20.8289
5.81683	0.03065	5.81667	2.26405	5.81667	15.94	5.817	4.24115	5.81667	21.2433
5.82517	0.0305	5.825	3.2344	5.825	14.6067	5.82533	3.7699	5.825	21.8432
5.8335	0.0298	5.83333	4.49085	5.83333	13.2791	5.83367	3.3607	5.83333	22.554
5.84183	0.02795	5.84167	6.0476	5.84167	11.9865	5.842	3.0067	5.84167	23.2995
5.85017	0.03	5.85	7.8941	5.85	10.7555	5.85033	2.7029	5.85	24.0075
5.8585	0.03145	5.85833	9.97975	5.85833	9.60345	5.85867	2.4428	5.85833	24.5978
5.86683	0.0339	5.86667	12.2266	5.86667	8.53855	5.867	2.21745	5.86667	25.0213
5.87517	0.03655	5.875	14.5359	5.875	7.56915	5.87533	2.02625	5.875	25.2334
5.8835	0.03715	5.88333	16.7948	5.88333	6.69795	5.88367	1.86065	5.88333	25.2104
5.89183	0.03925	5.89167	18.8942	5.89167	5.92005	5.892	1.7178	5.89167	24.9402
5.90017	0.04045	5.9	20.7486	5.9	5.2358	5.90033	1.59255	5.9	24.4309
5.9085	0.04035	5.90833	22.2854	5.90833	4.63215	5.90867	1.4836	5.90833	23.6928
5.91683	0.0437	5.91667	23.4657	5.91667	4.1093	5.917	1.3904	5.91667	22.7521
5.92517	0.04205	5.925	24.2639	5.925	3.6538	5.92533	1.3065	5.925	21.6348
5.9335	0.0418	5.93333	24.6794	5.93333	3.25985	5.93367	1.2313	5.93333	20.3832
5.94183	0.039	5.94167	24.7306	5.94167	2.9195	5.942	1.1637	5.94167	19.0301
5.95017	0.03685	5.95	24.4393	5.95	2.62445	5.95033	1.10225	5.95	17.6176
5.9585	0.03555	5.95833	23.84	5.95833	2.3688	5.95867	1.0484	5.95833	16.1849
5.96683	0.0328	5.96667	22.97	5.96667	2.14695	5.967	0.99485	5.96667	14.7695
5.97517	0.03145	5.975	21.8811	5.975	1.9574	5.97533	0.9474	5.975	13.4047
5.9835	0.02735	5.98333	20.6133	5.98333	1.78995	5.98367	0.90035	5.98333	12.119
5.99183	0.0287	5.99167	19.2201	5.99167	1.6459	5.992	0.85845	5.99167	10.9416
6.00017	0.033	6	17.7414	6	1.5177	6.00033	0.81625	6	9.8991
6.0085	0.044	6.00833	16.2258	6.00833	1.40575	6.00867	0.77765	6.00833	9.02145
6.01683	0.06465	6.01667	14.7158	6.01667	1.30685	6.017	0.7438	6.01667	8.3343
6.02517	0.1056	6.025	13.2462	6.025	1.2222	6.02533	0.7103	6.025	7.86995
6.0335	0.175	6.03333	11.8411	6.03333	1.14485	6.03367	0.67925	6.03333	7.65075
6.04183	0.28525	6.04167	10.5232	6.04167	1.0764	6.042	0.65075	6.04167	7.70035
6.05017	0.4572	6.05	9.30715	6.05	1.0133	6.05033	0.62445	6.05	8.03275
6.0585	0.71405	6.05833	8.2003	6.05833	0.95605	6.05867	0.59925	6.05833	8.6476
6.06683	1.0713	6.06667	7.2038	6.06667	0.9047	6.067	0.5775	6.06667	9.5296
6.07517	1.55715	6.075	6.3181	6.075	0.85675	6.07533	0.55585	6.075	10.6403
6.0835	2.1863	6.08333	5.54135	6.08333	0.81355	6.08367	0.5388	6.08333	11.9217
6.09183	2.96555	6.09167	4.8618	6.09167	0.77355	6.092	0.52275	6.09167	13.2996
6.10017	3.8908	6.1	4.2781	6.1	0.73835	6.10033	0.51015	6.1	14.6907
6.1085	4.9406	6.10833	3.7758	6.10833	0.7037	6.10867	0.4976	6.10833	16.0117
6.11683	6.08625	6.11667	3.35065	6.11667	0.6757	6.117	0.49145	6.11667	17.1916
6.12517	7.27275	6.125	2.98865	6.125	0.64505	6.12533	0.4819	6.125	18.1615
6.1335	8.44895	6.13333	2.6827	6.13333	0.61925	6.13367	0.4745	6.13333	18.8821
6.14183	9.55695	6.14167	2.42435	6.14167	0.59245	6.142	0.4682	6.14167	19.325
6.15017	10.542	6.15	2.20825	6.15	0.5716	6.15033	0.465	6.15	19.4807
6.1585	11.3612	6.15833	2.02675	6.15833	0.5504	6.15867	0.4613	6.15833	19.3563
6.16683	11.9743	6.16667	1.8703	6.16667	0.5309	6.167	0.45695	6.16667	18.9745
6.17517	12.3705	6.175	1.73645	6.175	0.5124	6.17533	0.453	6.175	18.3578
6.1835	12.5418	6.18333	1.6208	6.18333	0.49575	6.18367	0.44875	6.18333	17.5442
6.19183	12.4931	6.19167	1.519	6.19167	0.4788	6.192	0.4448	6.19167	16.579
6.20017	12.2434	6.2	1.4331	6.2	0.4659	6.20033	0.44275	6.2	15.5036
6.2085	11.8177	6.20833	1.34975	6.20833	0.44925	6.20867	0.4368	6.20833	14.3548
6.21683	11.2492	6.21667	1.277	6.21667	0.4371	6.217	0.43355	6.21667	13.1759
6.22517	10.5651	6.225	1.2073	6.225	0.42525	6.22533	0.4268	6.225	11.9959
6.2335	9.8046	6.23333	1.14415	6.23333	0.41415	6.23367	0.4209	6.23333	10.8468
6.24183	9.00215	6.24167	1.0852	6.24167	0.40475	6.242	0.4158	6.24167	9.75095
6.25017	8.1767	6.25	1.02725	6.25	0.39315	6.25033	0.4072	6.25	8.72135
6.2585	7.3615	6.25833	0.9724	6.25833	0.3833	6.25867	0.4012	6.25833	7.7712
6.26683	6.5738	6.26667	0.9215	6.26667	0.37495	6.267	0.39445	6.26667	6.90855
6.27517	5.82665	6.275	0.8737	6.275	0.36675	6.27533	0.3882	6.275	6.13245
6.2835	5.13305	6.28333	0.82765	6.28333	0.3586	6.28367	0.38015	6.28333	5.44435
6.29183	4.502	6.29167	0.785	6.29167	0.3518	6.292	0.3749	6.29167	4.8386
6.30017	3.9298	6.3	0.74185	6.3	0.34535	6.30033	0.3672	6.3	4.3104
6.3085	3.4235	6.30833	0.70425	6.30833	0.34085	6.30867	0.36125	6.30833	3.85385
6.31683	2.97565	6.31667	0.66925	6.31667	0.33455	6.317	0.3542	6.31667	3.4607
6.32517	2.58505	6.325	0.636	6.325	0.3284	6.32533	0.3484	6.325	3.12735
6.3335	2.24555	6.33333	0.60445	6.33333	0.32245	6.33367	0.34355	6.33333	2.84755
6.34183	1.95695	6.34167	0.579	6.34167	0.3204	6.342	0.34135	6.34167	2.6189
6.35017	1.706	6.35	0.5528	6.35	0.31515	6.35033	0.33745	6.35	2.42915
6.3585	1.4934	6.35833	0.5298	6.35833	0.31275	6.35867	0.33375	6.35833	2.2798
6.36683	1.31465	6.36667	0.50875	6.36667	0.31105	6.367	0.3328	6.36667	2.1652
6.37517	1.1613	6.375	0.4918	6.375	0.30955	6.37533	0.33185	6.375	2.07595
6.3835	1.0341	6.38333	0.47705	6.38333	0.3089	6.38367	0.3331	6.38333	2.0044
6.39183	0.92685	6.39167	0.462	6.39167	0.3101	6.392	0.33555	6.39167	1.9464
6.40017	0.8375	6.4	0.45275	6.4	0.31425	6.40033	0.3407	6.4	1.8994
6.4085	0.76215	6.40833	0.44565	6.40833	0.3168	6.40867	0.3469	6.40833	1.8491
6.41683	0.70305	6.41667	0.4444	6.41667	0.32535	6.417	0.3576	6.41667	1.8043
6.42517	0.65135	6.425	0.4423	6.425	0.3307	6.42533	0.3653	6.425	1.75325
6.4335	0.61115	6.43333	0.44365	6.43333	0.33705	6.43367	0.3717	6.43333	1.70215
6.44183	0.57595	6.44167	0.44795	6.44167	0.34205	6.442	0.3792	6.44167	1.64925
6.45017	0.5464	6.45	0.45335	6.45	0.34515	6.45033	0.3851	6.45	1.59625
6.4585	0.5199	6.45833	0.45675	6.45833	0.34575	6.45867	0.38755	6.45833	1.5407
6.46683	0.49825	6.46667	0.46045	6.46667	0.3453	6.467	0.38955	6.46667	1.48605
6.47517	0.47555	6.475	0.46125	6.475	0.34175	6.47533	0.38665	6.475	1.43235
6.4835	0.4571	6.48333	0.46105	6.48333	0.33785	6.48367	0.38435	6.48333	1.3809
6.49183	0.43745	6.49167	0.45765	6.49167	0.33265	6.492	0.3796	6.49167	1.33055
6.50017	0.42035	6.5	0.4543	6.5	0.3259	6.50033	0.3742	6.5	1.2834
6.5085	0.40295	6.50833	0.44935	6.50833	0.3192	6.50867	0.3652	6.50833	1.23705
6.51683	0.38515	6.51667	0.4421	6.51667	0.3134	6.517	0.35935	6.51667	1.19545
6.52517	0.3661	6.525	0.43165	6.525	0.305	6.52533	0.35015	6.525	1.15345
6.5335	0.3478	6.53333	0.42225	6.53333	0.2973	6.53367	0.3414	6.53333	1.1156
6.54183	0.2753	6.54167	0.3574	6.54167	0.23525	6.542	0.2774	6.54167	1.02355
6.55017	0.2957	6.55	0.384	6.55	0.2667	6.55033	0.3065	6.55	1.0245
6.5585	0.30155	6.55833	0.39675	6.55833	0.284	6.55867	0.32225	6.55833	1.0159
6.56683	0.2847	6.56667	0.38705	6.56667	0.27925	6.567	0.3155	6.56667	0.98435
6.57517	0.27045	6.575	0.3799	6.575	0.2777	6.57533	0.3093	6.575	0.95825
6.5835	0.2544	6.58333	0.36935	6.58333	0.2708	6.58367	0.3005	6.58333	0.92995
6.59183	0.2413	6.59167	0.36195	6.59167	0.2706	6.592	0.29555	6.59167	0.9088
6.60017	0.2303	6.6	0.3573	6.6	0.26845	6.60033	0.29185	6.6	0.88695
6.6085	0.21685	6.60833	0.34895	6.60833	0.2661	6.60867	0.28535	6.60833	0.86685
6.61683	0.2064	6.61667	0.34245	6.61667	0.2622	6.617	0.27885	6.61667	0.84835
6.62517	0.19415	6.625	0.33405	6.625	0.25975	6.62533	0.27295	6.625	0.83065
6.6335	0.1822	6.63333	0.3262	6.63333	0.256	6.63367	0.26725	6.63333	0.8136
6.64183	0.175	6.64167	0.32075	6.64167	0.25305	6.642	0.26255	6.64167	0.7987
6.65017	0.1655	6.65	0.31475	6.65	0.25095	6.65033	0.25895	6.65	0.78425
6.6585	0.161	6.65833	0.3096	6.65833	0.2499	6.65867	0.25645	6.65833	0.77115
6.66683	0.1527	6.66667	0.30515	6.66667	0.2467	6.667	0.253	6.66667	0.75735
6.67517	0.1473	6.675	0.2989	6.675	0.24405	6.67533	0.24895	6.675	0.74505
6.6835	0.1417	6.68333	0.2944	6.68333	0.2408	6.68367	0.24615	6.68333	0.7328
6.69183	0.13625	6.69167	0.28965	6.69167	0.23815	6.692	0.24455	6.69167	0.72255
6.70017	0.1315	6.7	0.28495	6.7	0.23395	6.70033	0.2429	6.7	0.7116
6.7085	0.12685	6.70833	0.27805	6.70833	0.22975	6.70867	0.24055	6.70833	0.7007
6.71683	0.1249	6.71667	0.27485	6.71667	0.22815	6.717	0.24035	6.71667	0.69285
6.72517	0.12195	6.725	0.2722	6.725	0.22465	6.72533	0.23945	6.725	0.68745
6.7335	0.1164	6.73333	0.2672	6.73333	0.2197	6.73367	0.2377	6.73333	0.67975
6.74183	0.11565	6.74167	0.26395	6.74167	0.21935	6.742	0.2389	6.74167	0.67475
6.75017	0.11265	6.75	0.25825	6.75	0.2154	6.75033	0.23885	6.75	0.67105
6.7585	0.11145	6.75833	0.25575	6.75833	0.21245	6.75867	0.2394	6.75833	0.6701
6.76683	0.1093	6.76667	0.2539	6.76667	0.2112	6.767	0.24065	6.76667	0.6716
6.77517	0.1094	6.775	0.25165	6.775	0.21115	6.77533	0.24445	6.775	0.6755
6.7835	0.1079	6.78333	0.25175	6.78333	0.21125	6.78367	0.2478	6.78333	0.6811
6.79183	0.10615	6.79167	0.251	6.79167	0.21055	6.792	0.2513	6.79167	0.68585
6.80017	0.10575	6.8	0.2509	6.8	0.21045	6.80033	0.2567	6.8	0.6931
6.8085	0.10835	6.80833	0.2516	6.80833	0.2134	6.80867	0.26165	6.80833	0.7028
6.81683	0.10615	6.81667	0.2521	6.81667	0.21505	6.817	0.2678	6.81667	0.7084
6.82517	0.10695	6.825	0.25405	6.825	0.21685	6.82533	0.27365	6.825	0.716
6.8335	0.1095	6.83333	0.26075	6.83333	0.222	6.83367	0.2819	6.83333	0.7251
6.84183	0.10915	6.84167	0.26455	6.84167	0.22415	6.842	0.28795	6.84167	0.73055
6.85017	0.1085	6.85	0.27065	6.85	0.22735	6.85033	0.29525	6.85	0.7354
6.8585	0.1106	6.85833	0.27645	6.85833	0.22935	6.85867	0.30145	6.85833	0.7372
6.86683	0.1113	6.86667	0.28215	6.86667	0.2317	6.867	0.30665	6.86667	0.7387
6.87517	0.11165	6.875	0.28885	6.875	0.23235	6.87533	0.3122	6.875	0.7379
6.8835	0.111	6.88333	0.29405	6.88333	0.23245	6.88367	0.31555	6.88333	0.73305
6.89183	0.1092	6.89167	0.2974	6.89167	0.2303	6.892	0.3188	6.89167	0.7296
6.90017	0.10965	6.9	0.30355	6.9	0.23215	6.90033	0.3211	6.9	0.7263
6.9085	0.10615	6.90833	0.3052	6.90833	0.2306	6.90867	0.3228	6.90833	0.721
6.91683	0.10455	6.91667	0.30665	6.91667	0.2296	6.917	0.3238	6.91667	0.71415
6.92517	0.10275	6.925	0.30705	6.925	0.22725	6.92533	0.32535	6.925	0.7079
6.9335	0.09865	6.93333	0.30345	6.93333	0.2252	6.93367	0.32455	6.93333	0.70165
6.94183	0.09835	6.94167	0.30195	6.94167	0.2228	6.942	0.32575	6.94167	0.69685
6.95017	0.0952	6.95	0.29885	6.95	0.2206	6.95033	0.32775	6.95	0.6907
6.9585	0.09365	6.95833	0.29685	6.95833	0.21845	6.95867	0.33125	6.95833	0.68825
6.96683	0.0913	6.96667	0.29095	6.96667	0.216	6.967	0.33065	6.96667	0.68175
6.97517	0.08855	6.975	0.28875	6.975	0.21705	6.97533	0.33415	6.975	0.6799
6.9835	0.0858	6.98333	0.2821	6.98333	0.21505	6.98367	0.3371	6.98333	0.67515
6.99183	0.08435	6.99167	0.27505	6.99167	0.2136	6.992	0.33815	6.99167	0.67045
7.00017	0.0816	7	0.2701	7	0.2118	7.00033	0.34045	7	0.66885
7.0085	0.0784	7.00833	0.26605	7.00833	0.21135	7.00867	0.3421	7.00833	0.6647
7.01683	0.07585	7.01667	0.2617	7.01667	0.2099	7.017	0.34465	7.01667	0.6608
7.02517	0.0743	7.025	0.25605	7.025	0.20825	7.02533	0.34525	7.025	0.65725
7.0335	0.0744	7.03333	0.2512	7.03333	0.2093	7.03367	0.34895	7.03333	0.65735
7.04183	0.0725	7.04167	0.24715	7.04167	0.20925	7.042	0.34975	7.04167	0.6545
7.05017	0.07205	7.05	0.24425	7.05	0.2094	7.05033	0.3498	7.05	0.6522
7.0585	0.06995	7.05833	0.23945	7.05833	0.2089	7.05867	0.3512	7.05833	0.65
7.06683	0.0654	7.06667	0.23375	7.06667	0.2053	7.067	0.3495	7.06667	0.64645
7.07517	0.06465	7.075	0.2313	7.075	0.2085	7.07533	0.3514	7.075	0.6456
7.0835	0.06375	7.08333	0.2275	7.08333	0.2084	7.08367	0.35045	7.08333	0.6429
7.09183	0.06255	7.09167	0.2249	7.09167	0.20965	7.092	0.34915	7.09167	0.6428
7.10017	0.06135	7.1	0.2227	7.1	0.20995	7.10033	0.3492	7.1	0.6414
7.1085	0.062	7.10833	0.22035	7.10833	0.211	7.10867	0.34745	7.10833	0.63945
7.11683	0.05985	7.11667	0.21545	7.11667	0.2109	7.117	0.34525	7.11667	0.63805
7.12517	0.05845	7.125	0.21245	7.125	0.21435	7.12533	0.3449	7.125	0.63725
7.1335	0.0595	7.13333	0.21305	7.13333	0.21595	7.13367	0.34455	7.13333	0.6364
7.14183	0.0594	7.14167	0.2117	7.14167	0.21855	7.142	0.3433	7.14167	0.63645
7.15017	0.05775	7.15	0.2103	7.15	0.21845	7.15033	0.34025	7.15	0.63265
7.1585	0.0571	7.15833	0.20975	7.15833	0.22175	7.15867	0.34	7.15833	0.63375
7.16683	0.05695	7.16667	0.20955	7.16667	0.22155	7.167	0.33945	7.16667	0.6327
7.17517	0.0569	7.175	0.2086	7.175	0.22475	7.17533	0.33775	7.175	0.63035
7.1835	0.0554	7.18333	0.2068	7.18333	0.22295	7.18367	0.33325	7.18333	0.626
7.19183	0.05375	7.19167	0.2051	7.19167	0.22335	7.192	0.33175	7.19167	0.6229
7.20017	0.05485	7.2	0.2044	7.2	0.2242	7.20033	0.3288	7.2	0.61985
7.2085	0.0541	7.20833	0.2048	7.20833	0.22545	7.20867	0.32575	7.20833	0.61645
7.21683	0.055	7.21667	0.20295	7.21667	0.2248	7.217	0.32325	7.21667	0.61125
7.22517	0.0534	7.225	0.20245	7.225	0.2239	7.22533	0.3203	7.225	0.6076
7.2335	0.0535	7.23333	0.20225	7.23333	0.22305	7.23367	0.3156	7.23333	0.6015
7.24183	0.0535	7.24167	0.20135	7.24167	0.2221	7.242	0.31265	7.24167	0.59775
7.25017	0.0535	7.25	0.20085	7.25	0.22285	7.25033	0.30975	7.25	0.595
7.2585	0.05155	7.25833	0.2014	7.25833	0.2205	7.25867	0.3052	7.25833	0.5903
7.26683	0.05125	7.26667	0.1995	7.26667	0.2181	7.267	0.30165	7.26667	0.58735
7.27517	0.0513	7.275	0.19785	7.275	0.21675	7.27533	0.29895	7.275	0.5848
7.2835	0.05105	7.28333	0.20005	7.28333	0.21595	7.28367	0.2972	7.28333	0.58455
7.29183	0.057	7.29167	0.2057	7.29167	0.2216	7.292	0.301	7.29167	0.5894
7.30017	0.06145	7.3	0.21045	7.3	0.2264	7.30033	0.3039	7.3	0.5928
7.3085	0.039	7.30833	0.18865	7.30833	0.2037	7.30867	0.2826	7.30833	0.5734
7.31683	0.0439	7.31667	0.19515	7.31667	0.20845	7.317	0.2862	7.31667	0.57935
7.32517	0.0263	7.325	0.1777	7.325	0.1915	7.32533	0.2699	7.325	0.56585
7.3335	0.05025	7.33333	0.2028	7.33333	0.21445	7.33367	0.2945	7.33333	0.594
7.34183	0.0457	7.34167	0.1979	7.34167	0.21045	7.342	0.29015	7.34167	0.59405
7.35017	0.04465	7.35	0.19805	7.35	0.2102	7.35033	0.2913	7.35	0.5998
7.3585	0.0467	7.35833	0.1994	7.35833	0.21215	7.35867	0.29585	7.35833	0.6076
7.36683	0.0496	7.36667	0.2033	7.36667	0.21705	7.367	0.30015	7.36667	0.6182
7.37517	0.0472	7.375	0.2013	7.375	0.2161	7.37533	0.2995	7.375	0.6252
7.3835	0.04755	7.38333	0.2003	7.38333	0.21765	7.38367	0.304	7.38333	0.6349
7.39183	0.048	7.39167	0.20065	7.39167	0.2204	7.392	0.30795	7.39167	0.64595
7.40017	0.04895	7.4	0.1991	7.4	0.2203	7.40033	0.31085	7.4	0.65675
7.4085	0.05105	7.40833	0.20035	7.40833	0.2242	7.40867	0.3171	7.40833	0.66925
7.41683	0.05585	7.41667	0.20315	7.41667	0.2294	7.417	0.32465	7.41667	0.68365
7.42517	0.0576	7.425	0.2031	7.425	0.22955	7.42533	0.3291	7.425	0.6953
7.4335	0.06	7.43333	0.2043	7.43333	0.2341	7.43367	0.33735	7.43333	0.70625
7.44183	0.0634	7.44167	0.20565	7.44167	0.23545	7.442	0.3462	7.44167	0.7168
7.45017	0.06785	7.45	0.2058	7.45	0.23725	7.45033	0.3554	7.45	0.72445
7.4585	0.07185	7.45833	0.20765	7.45833	0.23905	7.45867	0.36445	7.45833	0.73195
7.46683	0.0757	7.46667	0.20965	7.46667	0.24045	7.467	0.37295	7.46667	0.73635
7.47517	0.08035	7.475	0.2131	7.475	0.24175	7.47533	0.38195	7.475	0.73885
7.4835	0.0827	7.48333	0.21355	7.48333	0.2423	7.48367	0.3875	7.48333	0.73405
7.49183	0.0828	7.49167	0.21315	7.49167	0.23985	7.492	0.3946	7.49167	0.7297
7.50017	0.086	7.5	0.2145	7.5	0.2398	7.50033	0.39895	7.5	0.72285
7.5085	0.08665	7.50833	0.2159	7.50833	0.2376	7.50867	0.4	7.50833	0.7123
7.51683	0.0857	7.51667	0.21505	7.51667	0.2345	7.517	0.39985	7.51667	0.7011
7.52517	0.08635	7.525	0.2161	7.525	0.23425	7.52533	0.39895	7.525	0.68955
7.5335	0.0872	7.53333	0.2169	7.53333	0.2326	7.53367	0.39515	7.53333	0.6762
7.54183	0.08445	7.54167	0.2153	7.54167	0.2279	7.542	0.3877	7.54167	0.65945
7.55017	0.08455	7.55	0.21545	7.55	0.2282	7.55033	0.3808	7.55	0.6461
7.5585	0.08135	7.55833	0.2144	7.55833	0.2268	7.55867	0.3692	7.55833	0.6317
7.56683	0.07895	7.56667	0.2127	7.56667	0.22425	7.567	0.3565	7.56667	0.61565
7.57517	0.0761	7.575	0.21155	7.575	0.22395	7.57533	0.34215	7.575	0.6014
7.5835	0.07625	7.58333	0.2121	7.58333	0.2271	7.58367	0.32935	7.58333	0.5901
7.59183	0.0751	7.59167	0.21205	7.59167	0.22815	7.592	0.31565	7.59167	0.57975
7.60017	0.0733	7.6	0.21215	7.6	0.23055	7.60033	0.30135	7.6	0.5704
7.6085	0.07145	7.60833	0.21115	7.60833	0.232	7.60867	0.2859	7.60833	0.56085
7.61683	0.07055	7.61667	0.2108	7.61667	0.23525	7.617	0.26955	7.61667	0.55245
7.62517	0.0675	7.625	0.20895	7.625	0.23795	7.62533	0.25625	7.625	0.54565
7.6335	0.0674	7.63333	0.2079	7.63333	0.24	7.63367	0.244	7.63333	0.54095
7.64183	0.0671	7.64167	0.20645	7.64167	0.24315	7.642	0.2315	7.64167	0.5348
7.65017	0.06755	7.65	0.20815	7.65	0.24855	7.65033	0.2213	7.65	0.5328
7.6585	0.0662	7.65833	0.20995	7.65833	0.25165	7.65867	0.2132	7.65833	0.53105
7.66683	0.06505	7.66667	0.20805	7.66667	0.2539	7.667	0.2037	7.66667	0.5256
7.67517	0.06385	7.675	0.2096	7.675	0.25755	7.67533	0.1962	7.675	0.5238
7.6835	0.06425	7.68333	0.20785	7.68333	0.25905	7.68367	0.1892	7.68333	0.52175
7.69183	0.0622	7.69167	0.20885	7.69167	0.25605	7.692	0.18235	7.69167	0.51755
7.70017	0.0619	7.7	0.21065	7.7	0.2564	7.70033	0.1772	7.7	0.51625
7.7085	0.0635	7.70833	0.21345	7.70833	0.25555	7.70867	0.17375	7.70833	0.51415
7.71683	0.0637	7.71667	0.21445	7.71667	0.2503	7.717	0.1704	7.71667	0.5116
7.72517	0.0632	7.725	0.21825	7.725	0.24565	7.72533	0.1684	7.725	0.50855
7.7335	0.0618	7.73333	0.22075	7.73333	0.24075	7.73367	0.1674	7.73333	0.50505
7.74183	0.0637	7.74167	0.22475	7.74167	0.2342	7.742	0.1643	7.74167	0.50095
7.75017	0.06415	7.75	0.22875	7.75	0.22615	7.75033	0.1634	7.75	0.4972
7.7585	0.06335	7.75833	0.2335	7.75833	0.21725	7.75867	0.1611	7.75833	0.49115
7.76683	0.0644	7.76667	0.23805	7.76667	0.2097	7.767	0.1615	7.76667	0.48835
7.77517	0.0646	7.775	0.24305	7.775	0.2012	7.77533	0.16065	7.775	0.4818
7.7835	0.06445	7.78333	0.2466	7.78333	0.1909	7.78367	0.15915	7.78333	0.4763
7.79183	0.0671	7.79167	0.25215	7.79167	0.1835	7.792	0.1612	7.79167	0.4706
7.80017	0.0673	7.8	0.2553	7.8	0.17505	7.80033	0.1595	7.8	0.4645
7.8085	0.06835	7.80833	0.25885	7.80833	0.1676	7.80867	0.159	7.80833	0.45885
7.81683	0.069	7.81667	0.26275	7.81667	0.15975	7.817	0.15975	7.81667	0.45455
7.82517	0.06775	7.825	0.2641	7.825	0.15185	7.82533	0.15725	7.825	0.44815
7.8335	0.06915	7.83333	0.2678	7.83333	0.14745	7.83367	0.15825	7.83333	0.4446
7.84183	0.0705	7.84167	0.27095	7.84167	0.14265	7.842	0.159	7.84167	0.44265
7.85017	0.0698	7.85	0.27335	7.85	0.13825	7.85033	0.1588	7.85	0.4393
7.8585	0.06935	7.85833	0.2728	7.85833	0.13325	7.85867	0.1572	7.85833	0.43515
7.86683	0.06895	7.86667	0.27365	7.86667	0.12945	7.867	0.1571	7.86667	0.43305
7.87517	0.06925	7.875	0.2731	7.875	0.1266	7.87533	0.15485	7.875	0.43165
7.8835	0.06635	7.88333	0.2743	7.88333	0.12315	7.88367	0.15445	7.88333	0.43035
7.89183	0.06695	7.89167	0.27235	7.89167	0.12015	7.892	0.1516	7.89167	0.43015
7.90017	0.0679	7.9	0.27545	7.9	0.11945	7.90033	0.15185	7.9	0.43225
7.9085	0.0661	7.90833	0.27555	7.90833	0.11655	7.90867	0.15205	7.90833	0.43335
7.91683	0.06555	7.91667	0.2769	7.91667	0.11475	7.917	0.1501	7.91667	0.43175
7.92517	0.06585	7.925	0.2794	7.925	0.1137	7.92533	0.14745	7.925	0.4331
7.9335	0.0669	7.93333	0.28245	7.93333	0.1133	7.93367	0.1495	7.93333	0.4333
7.94183	0.065	7.94167	0.28575	7.94167	0.11115	7.942	0.1481	7.94167	0.43175
7.95017	0.06435	7.95	0.2897	7.95	0.1117	7.95033	0.14795	7.95	0.428
7.9585	0.06445	7.95833	0.2944	7.95833	0.10965	7.95867	0.1476	7.95833	0.42545
7.96683	0.06275	7.96667	0.29755	7.96667	0.1085	7.967	0.14665	7.96667	0.4175
7.97517	0.06345	7.975	0.2999	7.975	0.10835	7.97533	0.14715	7.975	0.41155
7.9835	0.0637	7.98333	0.30265	7.98333	0.10895	7.98367	0.14515	7.98333	0.40155
7.99183	0.06545	7.99167	0.3042	7.99167	0.10845	7.992	0.1465	7.99167	0.3938
8.00017	0.06355	8	0.302	8	0.1063	8.00033	0.1453	8	0.38095
8.0085	0.06385	8.00833	0.2995	8.00833	0.1045	8.00867	0.14665	8.00833	0.3704
8.01683	0.0628	8.01667	0.2943	8.01667	0.10305	8.017	0.145	8.01667	0.35905
8.02517	0.06395	8.025	0.2893	8.025	0.1048	8.02533	0.14715	8.025	0.3497
8.0335	0.06335	8.03333	0.2826	8.03333	0.1042	8.03367	0.1482	8.03333	0.34025
8.04183	0.06295	8.04167	0.27355	8.04167	0.10585	8.042	0.1492	8.04167	0.3312
8.05017	0.06235	8.05	0.2629	8.05	0.1087	8.05033	0.15125	8.05	0.32145
8.0585	0.0625	8.05833	0.2514	8.05833	0.10905	8.05867	0.1516	8.05833	0.31225
8.06683	0.06395	8.06667	0.24235	8.06667	0.11205	8.067	0.1568	8.06667	0.30865
8.07517	0.0631	8.075	0.2309	8.075	0.1137	8.07533	0.1582	8.075	0.29885
8.0835	0.0645	8.08333	0.22085	8.08333	0.11695	8.08367	0.1607	8.08333	0.294
8.09183	0.0648	8.09167	0.21205	8.09167	0.1189	8.092	0.16255	8.09167	0.28865
8.10017	0.065	8.1	0.20275	8.1	0.1202	8.10033	0.165	8.1	0.28315
8.1085	0.06395	8.10833	0.1911	8.10833	0.1209	8.10867	0.165	8.10833	0.2763
8.11683	0.06715	8.11667	0.1843	8.11667	0.12235	8.117	0.16665	8.11667	0.2728
8.12517	0.06865	8.125	0.17765	8.125	0.1231	8.12533	0.1663	8.125	0.26785
8.1335	0.06915	8.13333	0.1707	8.13333	0.12235	8.13367	0.16525	8.13333	0.26345
8.14183	0.06965	8.14167	0.16415	8.14167	0.1218	8.142	0.1652	8.14167	0.26095
8.15017	0.0708	8.15	0.15805	8.15	0.1224	8.15033	0.1643	8.15	0.25845
8.1585	0.0704	8.15833	0.1523	8.15833	0.11895	8.15867	0.1623	8.15833	0.2557
8.16683	0.0713	8.16667	0.14645	8.16667	0.11895	8.167	0.1626	8.16667	0.25595
8.17517	0.0715	8.175	0.1414	8.175	0.1169	8.17533	0.1591	8.175	0.2542
8.1835	0.0723	8.18333	0.13685	8.18333	0.1168	8.18367	0.15865	8.18333	0.2551
8.19183	0.0714	8.19167	0.12945	8.19167	0.1135	8.192	0.1555	8.19167	0.25405
8.20017	0.0711	8.2	0.12695	8.2	0.11225	8.20033	0.15485	8.2	0.2577
8.2085	0.0718	8.20833	0.123	8.20833	0.1118	8.20867	0.15215	8.20833	0.25915
8.21683	0.07125	8.21667	0.1189	8.21667	0.1094	8.217	0.1521	8.21667	0.25875
8.22517	0.071	8.225	0.11615	8.225	0.1088	8.22533	0.1522	8.225	0.2602
8.2335	0.074	8.23333	0.1148	8.23333	0.1094	8.23367	0.1536	8.23333	0.26045
8.24183	0.07395	8.24167	0.11315	8.24167	0.1088	8.242	0.15245	8.24167	0.26045
8.25017	0.0747	8.25	0.1122	8.25	0.1074	8.25033	0.15235	8.25	0.2603
8.2585	0.07705	8.25833	0.1101	8.25833	0.10745	8.25867	0.1524	8.25833	0.25865
8.26683	0.07675	8.26667	0.1097	8.26667	0.1072	8.267	0.1511	8.26667	0.25615
8.27517	0.0773	8.275	0.10865	8.275	0.1053	8.27533	0.1513	8.275	0.2546
8.2835	0.07845	8.28333	0.10905	8.28333	0.10695	8.28367	0.15345	8.28333	0.2544
8.29183	0.0785	8.29167	0.1103	8.29167	0.11025	8.292	0.15765	8.29167	0.2543
8.30017	0.07825	8.3	0.111	8.3	0.10975	8.30033	0.1595	8.3	0.2538
8.3085	0.07905	8.30833	0.1113	8.30833	0.1121	8.30867	0.16235	8.30833	0.25515
8.31683	0.0742	8.31667	0.11085	8.31667	0.1151	8.317	0.16495	8.31667	0.25725
8.32517	0.0733	8.325	0.11415	8.325	0.12185	8.32533	0.17245	8.325	0.26275
8.3335	0.0722	8.33333	0.11555	8.33333	0.12695	8.33367	0.1795	8.33333	0.26555
8.34183	0.06955	8.34167	0.1195	8.34167	0.13605	8.342	0.1889	8.34167	0.26975
8.35017	0.06785	8.35	0.12365	8.35	0.1461	8.35033	0.2011	8.35	0.2742
8.3585	0.06645	8.35833	0.1301	8.35833	0.15545	8.35867	0.2103	8.35833	0.2738
8.36683	0.0673	8.36667	0.138	8.36667	0.16285	8.367	0.21765	8.36667	0.2708
8.37517	0.06615	8.375	0.14725	8.375	0.1706	8.37533	0.22645	8.375	0.26545
8.3835	0.0673	8.38333	0.15845	8.38333	0.17495	8.38367	0.2315	8.38333	0.2597
8.39183	0.06645	8.39167	0.16445	8.39167	0.17345	8.392	0.2305	8.39167	0.25025
8.40017	0.0673	8.4	0.17185	8.4	0.17245	8.40033	0.2305	8.4	0.2415
8.4085	0.06835	8.40833	0.17775	8.40833	0.16885	8.40867	0.2272	8.40833	0.23175
8.41683	0.0708	8.41667	0.18185	8.41667	0.16405	8.417	0.22375	8.41667	0.2226
8.42517	0.07125	8.425	0.18065	8.425	0.15815	8.42533	0.21655	8.425	0.2138
8.4335	0.07285	8.43333	0.1784	8.43333	0.15245	8.43367	0.2111	8.43333	0.20665
8.44183	0.0728	8.44167	0.1733	8.44167	0.144	8.442	0.20505	8.44167	0.2001
8.45017	0.0705	8.45	0.1664	8.45	0.1371	8.45033	0.1991	8.45	0.1936
8.4585	0.0684	8.45833	0.1604	8.45833	0.1319	8.45867	0.19215	8.45833	0.18975
8.46683	0.0655	8.46667	0.1534	8.46667	0.12565	8.467	0.18805	8.46667	0.18625
8.47517	0.0605	8.475	0.14455	8.475	0.121	8.47533	0.1843	8.475	0.1813
8.4835	0.0577	8.48333	0.13895	8.48333	0.11835	8.48367	0.18265	8.48333	0.1783
8.49183	0.05295	8.49167	0.13205	8.49167	0.1151	8.492	0.1788	8.49167	0.1772
8.50017	0.051	8.5	0.1281	8.5	0.1144	8.50033	0.1775	8.5	0.17665
8.5085	0.04395	8.50833	0.1227	8.50833	0.1096	8.50867	0.17215	8.50833	0.17325
8.51683	0.0403	8.51667	0.1193	8.51667	0.10795	8.517	0.1722	8.51667	0.17235
8.52517	0.03665	8.525	0.11855	8.525	0.10885	8.52533	0.1711	8.525	0.171
8.5335	0.03265	8.53333	0.1149	8.53333	0.10635	8.53367	0.1685	8.53333	0.16885
8.54183	0.0292	8.54167	0.11245	8.54167	0.1055	8.542	0.1659	8.54167	0.166
8.55017	0.0284	8.55	0.11115	8.55	0.10535	8.55033	0.16455	8.55	0.1655
8.5585	0.0258	8.55833	0.1098	8.55833	0.10535	8.55867	0.161	8.55833	0.16365
8.56683	0.0261	8.56667	0.1105	8.56667	0.1061	8.567	0.1609	8.56667	0.1651
8.57517	0.0235	8.575	0.10955	8.575	0.105	8.57533	0.1567	8.575	0.1628
8.5835	0.0229	8.58333	0.1092	8.58333	0.10635	8.58367	0.15585	8.58333	0.16365
8.59183	0.02185	8.59167	0.1091	8.59167	0.1066	8.592	0.154	8.59167	0.163
8.60017	0.02215	8.6	0.1098	8.6	0.1091	8.60033	0.1534	8.6	0.16575
8.6085	0.0208	8.60833	0.1091	8.60833	0.10885	8.60867	0.15035	8.60833	0.16545
8.61683	0.01985	8.61667	0.1084	8.61667	0.1087	8.617	0.14835	8.61667	0.1659
8.62517	0.02115	8.625	0.10915	8.625	0.11225	8.62533	0.14845	8.625	0.1702
8.6335	0.0205	8.63333	0.1078	8.63333	0.1112	8.63367	0.14535	8.63333	0.17335
8.64183	0.02135	8.64167	0.10985	8.64167	0.1131	8.642	0.1454	8.64167	0.1776
8.65017	0.02145	8.65	0.10975	8.65	0.1147	8.65033	0.14395	8.65	0.18255
8.6585	0.02155	8.65833	0.11245	8.65833	0.1153	8.65867	0.1431	8.65833	0.1864
8.66683	0.02195	8.66667	0.1123	8.66667	0.11605	8.667	0.1419	8.66667	0.1917
8.67517	0.0228	8.675	0.1138	8.675	0.1171	8.67533	0.14065	8.675	0.1962
8.6835	0.02335	8.68333	0.11375	8.68333	0.117	8.68367	0.1388	8.68333	0.19945
8.69183	0.0254	8.69167	0.115	8.69167	0.119	8.692	0.13915	8.69167	0.20375
8.70017	0.0259	8.7	0.11575	8.7	0.11885	8.70033	0.13915	8.7	0.20675
8.7085	0.02815	8.70833	0.11795	8.70833	0.1198	8.70867	0.139	8.70833	0.21055
8.71683	0.03045	8.71667	0.11995	8.71667	0.12205	8.717	0.14085	8.71667	0.2142
8.72517	0.03355	8.725	0.1227	8.725	0.1231	8.72533	0.14185	8.725	0.2166
8.7335	0.0347	8.73333	0.1214	8.73333	0.1221	8.73367	0.14	8.73333	0.21655
8.74183	0.0376	8.74167	0.123	8.74167	0.12235	8.742	0.14045	8.74167	0.216
8.75017	0.03815	8.75	0.124	8.75	0.122	8.75033	0.1385	8.75	0.2155
8.7585	0.0413	8.75833	0.12585	8.75833	0.121	8.75867	0.14	8.75833	0.2135
8.76683	0.04045	8.76667	0.12435	8.76667	0.11965	8.767	0.1401	8.76667	0.20845
8.77517	0.0435	8.775	0.126	8.775	0.1198	8.77533	0.14135	8.775	0.20655
8.7835	0.0446	8.78333	0.12755	8.78333	0.119	8.78367	0.1407	8.78333	0.2037
8.79183	0.04405	8.79167	0.1289	8.79167	0.1184	8.792	0.14085	8.79167	0.2
8.80017	0.0458	8.8	0.12785	8.8	0.11775	8.80033	0.1414	8.8	0.19435
8.8085	0.04765	8.80833	0.129	8.80833	0.11965	8.80867	0.14365	8.80833	0.19305
8.81683	0.0448	8.81667	0.12745	8.81667	0.1173	8.817	0.14245	8.81667	0.18735
8.82517	0.0444	8.825	0.1281	8.825	0.1166	8.82533	0.1434	8.825	0.1836
8.8335	0.04435	8.83333	0.1279	8.83333	0.11655	8.83367	0.14305	8.83333	0.1794
8.84183	0.04265	8.84167	0.1264	8.84167	0.1141	8.842	0.14225	8.84167	0.176
8.85017	0.0418	8.85	0.1271	8.85	0.1128	8.85033	0.14325	8.85	0.17345
8.8585	0.0391	8.85833	0.12425	8.85833	0.11005	8.85867	0.14225	8.85833	0.1686
8.86683	0.03895	8.86667	0.12295	8.86667	0.1102	8.867	0.14245	8.86667	0.1673
8.87517	0.0377	8.875	0.12295	8.875	0.1108	8.87533	0.1439	8.875	0.16575
8.8835	0.0366	8.88333	0.1223	8.88333	0.1106	8.88367	0.1451	8.88333	0.1664
8.89183	0.03445	8.89167	0.1197	8.89167	0.1092	8.892	0.14345	8.89167	0.16255
8.90017	0.03265	8.9	0.1199	8.9	0.1081	8.90033	0.14335	8.9	0.1649
8.9085	0.0326	8.90833	0.11925	8.90833	0.10695	8.90867	0.1444	8.90833	0.16595
8.91683	0.03155	8.91667	0.117	8.91667	0.1064	8.917	0.14505	8.91667	0.16745
8.92517	0.03265	8.925	0.1174	8.925	0.10675	8.92533	0.14755	8.925	0.16975
8.9335	0.0314	8.93333	0.11675	8.93333	0.107	8.93367	0.14785	8.93333	0.17345
8.94183	0.03035	8.94167	0.1168	8.94167	0.10615	8.942	0.1471	8.94167	0.1762
8.95017	0.0299	8.95	0.1158	8.95	0.10535	8.95033	0.14835	8.95	0.17935
8.9585	0.0288	8.95833	0.11515	8.95833	0.10715	8.95867	0.14805	8.95833	0.1832
8.96683	0.0298	8.96667	0.1175	8.96667	0.109	8.967	0.1512	8.96667	0.18875
8.97517	0.03205	8.975	0.1181	8.975	0.1093	8.97533	0.1544	8.975	0.194
8.9835	0.0319	8.98333	0.1193	8.98333	0.11055	8.98367	0.15355	8.98333	0.19675
8.99183	0.0345	8.99167	0.1202	8.99167	0.11355	8.992	0.1559	8.99167	0.202
9.00017	0.03485	9	0.1213	9	0.1141	9.00033	0.15715	9	0.2042
9.0085	0.0369	9.00833	0.12435	9.00833	0.1161	9.00867	0.15925	9.00833	0.207
9.01683	0.03625	9.01667	0.125	9.01667	0.11505	9.017	0.16135	9.01667	0.2085
9.02517	0.04005	9.025	0.12885	9.025	0.11665	9.02533	0.16365	9.025	0.2099
9.0335	0.04025	9.03333	0.1313	9.03333	0.11865	9.03367	0.1647	9.03333	0.21105
9.04183	0.0419	9.04167	0.1343	9.04167	0.12	9.042	0.16725	9.04167	0.2115
9.05017	0.04435	9.05	0.137	9.05	0.1227	9.05033	0.1711	9.05	0.21405
9.0585	0.0488	9.05833	0.1422	9.05833	0.12545	9.05867	0.17415	9.05833	0.2142
9.06683	0.0499	9.06667	0.1463	9.06667	0.12895	9.067	0.17675	9.06667	0.21545
9.07517	0.05245	9.075	0.15225	9.075	0.13065	9.07533	0.18195	9.075	0.2153
9.0835	0.05375	9.08333	0.15565	9.08333	0.13445	9.08367	0.18455	9.08333	0.21705
9.09183	0.0561	9.09167	0.1594	9.09167	0.1368	9.092	0.1872	9.09167	0.21715
9.10017	0.058	9.1	0.1626	9.1	0.13905	9.10033	0.19055	9.1	0.218
9.1085	0.05935	9.10833	0.1678	9.10833	0.1435	9.10867	0.19635	9.10833	0.21935
9.11683	0.0598	9.11667	0.17045	9.11667	0.14725	9.117	0.19875	9.11667	0.22125
9.12517	0.06135	9.125	0.17425	9.125	0.15185	9.12533	0.2035	9.125	0.2237
9.1335	0.06035	9.13333	0.17595	9.13333	0.15665	9.13367	0.20715	9.13333	0.2252
9.14183	0.06035	9.14167	0.1776	9.14167	0.1602	9.142	0.21285	9.14167	0.2267
9.15017	0.06015	9.15	0.1808	9.15	0.16625	9.15033	0.21685	9.15	0.22865
9.1585	0.06135	9.15833	0.18605	9.15833	0.1715	9.15867	0.22365	9.15833	0.2327
9.16683	0.05905	9.16667	0.1872	9.16667	0.1745	9.167	0.2264	9.16667	0.2322
9.17517	0.05995	9.175	0.1908	9.175	0.1794	9.17533	0.2307	9.175	0.23355
9.1835	0.06005	9.18333	0.19295	9.18333	0.18265	9.18367	0.23235	9.18333	0.2331
9.19183	0.0603	9.19167	0.19815	9.19167	0.1859	9.192	0.23545	9.19167	0.23515
9.20017	0.0619	9.2	0.1997	9.2	0.18675	9.20033	0.23595	9.2	0.23445
9.2085	0.0611	9.20833	0.20085	9.20833	0.18505	9.20867	0.23465	9.20833	0.2329
9.21683	0.0613	9.21667	0.20135	9.21667	0.18425	9.217	0.2329	9.21667	0.2308
9.22517	0.064	9.225	0.2034	9.225	0.18255	9.22533	0.23035	9.225	0.22765
9.2335	0.0639	9.23333	0.20175	9.23333	0.1784	9.23367	0.2281	9.23333	0.2235
9.24183	0.06685	9.24167	0.19905	9.24167	0.17615	9.242	0.22375	9.24167	0.2201
9.25017	0.06975	9.25	0.1976	9.25	0.1729	9.25033	0.22075	9.25	0.2171
9.2585	0.0706	9.25833	0.1944	9.25833	0.16885	9.25867	0.217	9.25833	0.21455
9.26683	0.07055	9.26667	0.18955	9.26667	0.1657	9.267	0.2125	9.26667	0.2095
9.27517	0.07155	9.275	0.18635	9.275	0.1618	9.27533	0.2092	9.275	0.20755
9.2835	0.074	9.28333	0.1847	9.28333	0.1603	9.28367	0.20655	9.28333	0.205
9.29183	0.07375	9.29167	0.1807	9.29167	0.1573	9.292	0.203	9.29167	0.20295
9.30017	0.0742	9.3	0.17855	9.3	0.15635	9.30033	0.20325	9.3	0.2028
9.3085	0.0708	9.30833	0.1756	9.30833	0.15475	9.30867	0.19865	9.30833	0.1996
9.31683	0.0696	9.31667	0.17415	9.31667	0.15415	9.317	0.1983	9.31667	0.1991
9.32517	0.06875	9.325	0.1727	9.325	0.1525	9.32533	0.19845	9.325	0.19955
9.3335	0.0642	9.33333	0.1683	9.33333	0.1493	9.33367	0.19555	9.33333	0.1964
9.34183	0.0623	9.34167	0.1693	9.34167	0.1506	9.342	0.1962	9.34167	0.19785
9.35017	0.0601	9.35	0.17015	9.35	0.1517	9.35033	0.19675	9.35	0.198
9.3585	0.05825	9.35833	0.17055	9.35833	0.1522	9.35867	0.19655	9.35833	0.1973
9.36683	0.0553	9.36667	0.1674	9.36667	0.15045	9.367	0.1948	9.36667	0.1952
9.37517	0.0544	9.375	0.16715	9.375	0.1517	9.37533	0.1967	9.375	0.1959
9.3835	0.0507	9.38333	0.165	9.38333	0.14985	9.38367	0.1942	9.38333	0.19445
9.39183	0.0499	9.39167	0.16675	9.39167	0.15105	9.392	0.1962	9.39167	0.1954
9.40017	0.0469	9.4	0.1643	9.4	0.14945	9.40033	0.19505	9.4	0.19465
9.4085	0.0461	9.40833	0.16455	9.40833	0.1521	9.40867	0.1969	9.40833	0.19555
9.41683	0.0471	9.41667	0.16525	9.41667	0.1538	9.417	0.19845	9.41667	0.1944
9.42517	0.0426	9.425	0.162	9.425	0.1511	9.42533	0.19745	9.425	0.1941
9.4335	0.04685	9.43333	0.16255	9.43333	0.15445	9.43367	0.19875	9.43333	0.19495
9.44183	0.0446	9.44167	0.16255	9.44167	0.15435	9.442	0.1993	9.44167	0.19545
9.45017	0.04385	9.45	0.1616	9.45	0.1565	9.45033	0.20175	9.45	0.19425
9.4585	0.04345	9.45833	0.1609	9.45833	0.15825	9.45867	0.20265	9.45833	0.19535
9.46683	0.04385	9.46667	0.16045	9.46667	0.15865	9.467	0.2052	9.46667	0.1958
9.47517	0.04565	9.475	0.1612	9.475	0.1606	9.47533	0.2113	9.475	0.1978
9.4835	0.0461	9.48333	0.1628	9.48333	0.1623	9.48367	0.21905	9.48333	0.19765
9.49183	0.0475	9.49167	0.1651	9.49167	0.1695	9.492	0.2481	9.49167	0.2002
9.50017	0.04885	9.5	0.16635	9.5	0.1811	9.50033	0.34995	9.5	0.2013
9.5085	0.0484	9.50833	0.168	9.50833	0.2322	9.50867	0.57225	9.50833	0.203
9.51683	0.0463	9.51667	0.17025	9.51667	0.35805	9.517	0.7807	9.51667	0.20295
9.52517	0.04675	9.525	0.177	9.525	0.49525	9.52533	0.8736	9.525	0.2058
9.5335	0.04905	9.53333	0.2091	9.53333	0.56165	9.53367	0.88515	9.53333	0.2127
9.54183	0.0488	9.54167	0.28875	9.54167	0.56565	9.542	0.8469	9.54167	0.21725
9.55017	0.0515	9.55	0.3934	9.55	0.54065	9.55033	0.77985	9.55	0.2284
9.5585	0.0507	9.55833	0.44365	9.55833	0.48205	9.55867	0.8391	9.55833	0.25825
9.56683	0.05045	9.56667	0.4456	9.56667	0.45465	9.567	1.38635	9.56667	0.36425
9.57517	0.0489	9.575	0.41955	9.575	0.8465	9.57533	2.1163	9.575	0.5906
9.5835	0.05145	9.58333	0.37	9.58333	1.5779	9.58367	2.693	9.58333	0.81855
9.59183	0.0529	9.59167	0.34565	9.59167	2.245	9.592	3.10125	9.59167	0.9467
9.60017	0.0516	9.6	0.7305	9.6	2.74435	9.60033	3.39415	9.6	0.98495
9.6085	0.05155	9.60833	1.4679	9.60833	3.11005	9.60867	3.6155	9.60833	0.96065
9.61683	0.0531	9.61667	2.1491	9.61667	3.37845	9.617	3.8117	9.61667	0.9186
9.62517	0.05435	9.625	2.6692	9.625	3.60355	9.62533	4.00825	9.625	0.8906
9.6335	0.0532	9.63333	3.04915	9.63333	3.82095	9.63367	4.17635	9.63333	0.95585
9.64183	0.05325	9.64167	3.32735	9.64167	4.0206	9.642	4.298	9.64167	1.4059
9.65017	0.05435	9.65	3.5581	9.65	4.1755	9.65033	4.3819	9.65	2.0657
9.6585	0.0562	9.65833	3.781	9.65833	4.2841	9.65867	4.44065	9.65833	2.6325
9.66683	0.0544	9.66667	3.9804	9.66667	4.35925	9.667	4.4826	9.66667	3.0552
9.67517	0.05735	9.675	4.1344	9.675	4.41345	9.67533	4.51495	9.675	3.3651
9.6835	0.05765	9.68333	4.24035	9.68333	4.45205	9.68367	4.53865	9.68333	3.5948
9.69183	0.0572	9.69167	4.31135	9.69167	4.48205	9.692	4.5608	9.69167	3.7944
9.70017	0.05875	9.7	4.3642	9.7	4.507	9.70033	4.5806	9.7	3.9886
9.7085	0.05955	9.70833	4.40225	9.70833	4.5253	9.70867	4.59625	9.70833	4.15105
9.71683	0.0594	9.71667	4.43435	9.71667	4.5414	9.717	4.6109	9.71667	4.2699
9.72517	0.0601	9.725	4.45635	9.725	4.5553	9.72533	4.62285	9.725	4.3466
9.7335	0.06005	9.73333	4.47665	9.73333	4.5663	9.73367	4.6343	9.73333	4.3975
9.74183	0.0599	9.74167	4.49275	9.74167	4.5754	9.742	4.64475	9.74167	4.4326
9.75017	0.0624	9.75	4.5112	9.75	4.58845	9.75033	4.65835	9.75	4.4613
9.7585	0.0613	9.75833	4.5237	9.75833	4.59455	9.75867	4.66595	9.75833	4.47965
9.76683	0.062	9.76667	4.53505	9.76667	4.60185	9.767	4.67345	9.76667	4.49245
9.77517	0.06295	9.775	4.5477	9.775	4.6098	9.77533	4.6822	9.775	4.5054
9.7835	0.06325	9.78333	4.5577	9.78333	4.6185	9.78367	4.6912	9.78333	4.515
9.79183	0.0625	9.79167	4.56785	9.79167	4.6253	9.792	4.6968	9.79167	4.5209
9.80017	0.06275	9.8	4.5738	9.8	4.6301	9.80033	4.70275	9.8	4.52545
9.8085	0.06395	9.80833	4.5831	9.80833	4.6368	9.80867	4.7075	9.80833	4.5302
9.81683	0.06495	9.81667	4.59175	9.81667	4.6421	9.817	4.7113	9.81667	4.53365
9.82517	0.06575	9.825	4.59835	9.825	4.64765	9.82533	4.71385	9.825	4.5346
9.8335	0.07065	9.83333	4.6046	9.83333	4.6508	9.83367	4.7151	9.83333	4.5357
9.84183	0.09105	9.84167	4.6103	9.84167	4.65195	9.842	4.7131	9.84167	4.5359
9.85017	0.11975	9.85	4.61665	9.85	4.65255	9.85033	4.7117	9.85	4.5357
9.8585	0.13945	9.85833	4.6202	9.85833	4.6535	9.85867	4.70885	9.85833	4.5385
9.86683	0.14025	9.86667	4.62145	9.86667	4.6516	9.867	4.7038	9.86667	4.5402
9.87517	0.1315	9.875	4.62165	9.875	4.64855	9.87533	4.70035	9.875	4.5422
9.8835	0.1275	9.88333	4.6206	9.88333	4.64265	9.88367	4.6938	9.88333	4.54465
9.89183	0.12805	9.89167	4.61685	9.89167	4.6355	9.892	4.68545	9.89167	4.5447
9.90017	0.13215	9.9	4.6138	9.9	4.6306	9.90033	4.6801	9.9	4.55
9.9085	0.12625	9.90833	4.61195	9.90833	4.62545	9.90867	4.67435	9.90833	4.55395
9.91683	0.10515	9.91667	4.606	9.91667	4.61655	9.917	4.6648	9.91667	4.5549
9.92517	0.08065	9.925	4.59935	9.925	4.61	9.92533	4.65605	9.925	4.55655
9.9335	0.18705	9.93333	4.59145	9.93333	4.60065	9.93367	4.64695	9.93333	4.5578
9.94183	0.59405	9.94167	4.58625	9.94167	4.59065	9.942	4.64	9.94167	4.5589
9.95017	1.2074	9.95	4.57935	9.95	4.5813	9.95033	4.63005	9.95	4.5578
9.9585	1.81775	9.95833	4.56945	9.95833	4.5729	9.95867	4.62045	9.95833	4.55745
9.96683	2.3071	9.96667	4.5634	9.96667	4.5635	9.967	4.61095	9.96667	4.55675
9.97517	2.66915	9.975	4.55485	9.975	4.5552	9.97533	4.6026	9.975	4.55525
9.9835	2.956	9.98333	4.5466	9.98333	4.5435	9.98367	4.59385	9.98333	4.5515
9.99183	3.1969	9.99167	4.5358	9.99167	4.53415	9.992	4.5834	9.99167	4.5456
10.0002	3.391	10	4.5295	10	4.5258	10.0003	4.57345	10	4.5414
10.0085	3.533	10.0083	4.5191	10.0083	4.5166	10.0087	4.5633	10.0083	4.5331
10.0168	3.6355	10.0167	4.51155	10.0167	4.505	10.017	4.552	10.0167	4.52385
10.0252	3.7067	10.025	4.50155	10.025	4.4936	10.0253	4.54145	10.025	4.5158
10.0335	3.75585	10.0333	4.4929	10.0333	4.48355	10.0337	4.53085	10.0333	4.50545
10.0418	3.79425	10.0417	4.4831	10.0417	4.4726	10.042	4.52085	10.0417	4.49465
10.0502	3.8192	10.05	4.47175	10.05	4.461	10.0503	4.5092	10.05	4.4808
10.0585	3.8388	10.0583	4.46175	10.0583	4.4498	10.0587	4.4977	10.0583	4.46935
10.0668	3.8524	10.0667	4.451	10.0667	4.43845	10.067	4.48625	10.0667	4.4554
10.0752	3.8625	10.075	4.4405	10.075	4.42635	10.0753	4.4752	10.075	4.44035
10.0835	3.86935	10.0833	4.4303	10.0833	4.416	10.0837	4.46415	10.0833	4.42635
10.0918	3.87425	10.0917	4.41805	10.0917	4.4056	10.092	4.4542	10.0917	4.41205
10.1002	3.8766	10.1	4.4077	10.1	4.39505	10.1003	4.44355	10.1	4.3984
10.1085	3.87625	10.1083	4.3968	10.1083	4.3824	10.1087	4.4313	10.1083	4.38175
10.1168	3.8757	10.1167	4.3864	10.1167	4.37305	10.117	4.4211	10.1167	4.36765
10.1252	3.87195	10.125	4.375	10.125	4.36	10.1253	4.4093	10.125	4.35215
10.1335	3.86955	10.1333	4.36475	10.1333	4.3512	10.1337	4.39915	10.1333	4.34045
10.1418	3.86535	10.1417	4.35255	10.1417	4.33745	10.142	4.3872	10.1417	4.3248
10.1502	3.8628	10.15	4.3432	10.15	4.328	10.1503	4.37815	10.15	4.31315
10.1585	3.8587	10.1583	4.33235	10.1583	4.31665	10.1587	4.3659	10.1583	4.2991
10.1668	3.85445	10.1667	4.3207	10.1667	4.3047	10.167	4.3545	10.1667	4.28465
10.1752	3.8524	10.175	4.30965	10.175	4.2937	10.1753	4.344	10.175	4.27015
10.1835	3.8513	10.1833	4.29915	10.1833	4.2836	10.1837	4.33335	10.1833	4.2584
10.1918	3.8505	10.1917	4.29095	10.1917	4.27435	10.192	4.32475	10.1917	4.24685
10.2002	3.8471	10.2	4.28055	10.2	4.2633	10.2003	4.31385	10.2	4.2354
10.2085	3.84585	10.2083	4.2706	10.2083	4.25335	10.2087	4.3031	10.2083	4.22325
10.2168	3.8447	10.2167	4.2604	10.2167	4.24375	10.217	4.29325	10.2167	4.21195
10.2252	3.8411	10.225	4.24895	10.225	4.23105	10.2253	4.2823	10.225	4.1985
10.2335	3.839	10.2333	4.23975	10.2333	4.2216	10.2337	4.2729	10.2333	4.18775
10.2418	3.83595	10.2417	4.22945	10.2417	4.21255	10.242	4.2618	10.2417	4.17515
10.2502	3.8289	10.25	4.21865	10.25	4.20045	10.2503	4.25035	10.25	4.16205
10.2585	3.82665	10.2583	4.21165	10.2583	4.1913	10.2587	4.24195	10.2583	4.1525
10.2668	3.8187	10.2667	4.1966	10.2667	4.1784	10.267	4.2297	10.2667	4.13875
10.2752	3.8121	10.275	4.18605	10.275	4.1679	10.2753	4.21655	10.275	4.1252
10.2835	3.80815	10.2833	4.1774	10.2833	4.157	10.2837	4.20695	10.2833	4.1151
10.2918	3.8001	10.2917	4.1667	10.2917	4.14585	10.292	4.19565	10.2917	4.10345
10.3002	3.7917	10.3	4.1543	10.3	4.13355	10.3003	4.1817	10.3	4.0888
10.3085	3.78555	10.3083	4.14435	10.3083	4.12285	10.3087	4.17155	10.3083	4.07725
10.3168	3.77775	10.3167	4.13295	10.3167	4.1111	10.317	4.15765	10.3167	4.0643
10.3252	3.7681	10.325	4.121	10.325	4.09755	10.3253	4.1469	10.325	4.05145
10.3335	3.76045	10.3333	4.1114	10.3333	4.0866	10.3337	4.13425	10.3333	4.03865
10.3418	3.7501	10.3417	4.09855	10.3417	4.07285	10.342	4.1207	10.3417	4.0237
10.3502	3.7424	10.35	4.0888	10.35	4.0597	10.3503	4.1089	10.35	4.01085
10.3585	3.7323	10.3583	4.07605	10.3583	4.0464	10.3587	4.09565	10.3583	3.99535
10.3668	3.72275	10.3667	4.06495	10.3667	4.0343	10.367	4.08265	10.3667	3.98165
10.3752	3.71405	10.375	4.0533	10.375	4.0215	10.3753	4.06875	10.375	3.97065
10.3835	3.70185	10.3833	4.03785	10.3833	4.0069	10.3837	4.0535	10.3833	3.95375
10.3918	3.69315	10.3917	4.02655	10.3917	3.9939	10.392	4.04135	10.3917	3.9395
10.4002	3.6816	10.4	4.01435	10.4	3.97915	10.4003	4.0285	10.4	3.92455
10.4085	3.67115	10.4083	4.00225	10.4083	3.9651	10.4087	4.01555	10.4083	3.909
10.4168	3.6611	10.4167	3.98895	10.4167	3.9537	10.417	4.0019	10.4167	3.89565
10.4252	3.6502	10.425	3.9729	10.425	3.93765	10.4253	3.98705	10.425	3.8785
10.4335	3.6428	10.4333	3.9628	10.4333	3.92555	10.4337	3.9733	10.4333	3.866
10.4418	3.63065	10.4417	3.94725	10.4417	3.9102	10.442	3.9578	10.4417	3.85005
10.4502	3.6198	10.45	3.9333	10.45	3.89405	10.4503	3.9425	10.45	3.83395
10.4585	3.6072	10.4583	3.91865	10.4583	3.8782	10.4587	3.9262	10.4583	3.81655
10.4668	3.59515	10.4667	3.9042	10.4667	3.86365	10.467	3.91295	10.4667	3.80215
10.4752	3.58345	10.475	3.8912	10.475	3.8499	10.4753	3.89855	10.475	3.78795
10.4835	3.57015	10.4833	3.8756	10.4833	3.83315	10.4837	3.8807	10.4833	3.7694
10.4918	3.56105	10.4917	3.8607	10.4917	3.81905	10.492	3.868	10.4917	3.7544
10.5002	3.54875	10.5	3.8457	10.5	3.80275	10.5003	3.8504	10.5	3.7377
10.5085	3.5348	10.5083	3.82995	10.5083	3.7862	10.5087	3.8337	10.5083	3.72015
10.5168	3.52155	10.5167	3.8135	10.5167	3.7694	10.517	3.81665	10.5167	3.7029
10.5252	3.50885	10.525	3.7984	10.525	3.75235	10.5253	3.8011	10.525	3.68535
10.5335	3.4971	10.5333	3.7845	10.5333	3.7372	10.5337	3.7846	10.5333	3.6714
10.5418	3.48425	10.5417	3.76725	10.5417	3.72015	10.542	3.76895	10.5417	3.65305
10.5502	3.47205	10.55	3.75155	10.55	3.70305	10.5503	3.7506	10.55	3.63515
10.5585	3.46055	10.5583	3.737	10.5583	3.68795	10.5587	3.73685	10.5583	3.61905
10.5668	3.44785	10.5667	3.72045	10.5667	3.6719	10.567	3.72075	10.5667	3.60315
10.5752	3.43275	10.575	3.70545	10.575	3.6545	10.5753	3.7039	10.575	3.5854
10.5835	3.41955	10.5833	3.6884	10.5833	3.63775	10.5837	3.6861	10.5833	3.5687
10.5918	3.40505	10.5917	3.6721	10.5917	3.62085	10.592	3.66905	10.5917	3.5503
10.6002	3.3904	10.6	3.6557	10.6	3.6025	10.6003	3.65155	10.6	3.53275
10.6085	3.3757	10.6083	3.63795	10.6083	3.5868	10.6087	3.6346	10.6083	3.51445
10.6168	3.35995	10.6167	3.6214	10.6167	3.5698	10.617	3.61745	10.6167	3.49595
10.6252	3.3426	10.625	3.6059	10.625	3.5533	10.6253	3.6006	10.625	3.4788
10.6335	3.3276	10.6333	3.5886	10.6333	3.53425	10.6337	3.58315	10.6333	3.46135
10.6418	3.3115	10.6417	3.5727	10.6417	3.51605	10.642	3.56605	10.6417	3.44385
10.6502	3.29335	10.65	3.55565	10.65	3.5008	10.6503	3.54865	10.65	3.42645
10.6585	3.27395	10.6583	3.53735	10.6583	3.4828	10.6587	3.5317	10.6583	3.4086
10.6668	3.25575	10.6667	3.52245	10.6667	3.4675	10.667	3.51455	10.6667	3.3908
10.6752	3.2353	10.675	3.50285	10.675	3.44855	10.6753	3.49415	10.675	3.36785
10.6835	3.2167	10.6833	3.48545	10.6833	3.4327	10.6837	3.4788	10.6833	3.35145
10.6918	3.1977	10.6917	3.46995	10.6917	3.4148	10.692	3.4616	10.6917	3.33275
10.7002	3.17585	10.7	3.45245	10.7	3.39595	10.7003	3.4451	10.7	3.3135
10.7085	3.1519	10.7083	3.43305	10.7083	3.3767	10.7087	3.42575	10.7083	3.29325
10.7168	3.1308	10.7167	3.4163	10.7167	3.35905	10.717	3.40775	10.7167	3.27375
10.7252	3.1074	10.725	3.3988	10.725	3.3414	10.7253	3.3894	10.725	3.25195
10.7335	3.08455	10.7333	3.3816	10.7333	3.32225	10.7337	3.3711	10.7333	3.23085
10.7418	3.062	10.7417	3.3628	10.7417	3.3034	10.742	3.35125	10.7417	3.21025
10.7502	3.03915	10.75	3.34565	10.75	3.28525	10.7503	3.3334	10.75	3.189
10.7585	3.01395	10.7583	3.32625	10.7583	3.2642	10.7587	3.31255	10.7583	3.16665
10.7668	2.9893	10.7667	3.30765	10.7667	3.2442	10.767	3.2939	10.7667	3.14185
10.7752	2.9647	10.775	3.28795	10.775	3.2237	10.7753	3.2714	10.775	3.1171
10.7835	2.93965	10.7833	3.26685	10.7833	3.20215	10.7837	3.25	10.7833	3.09175
10.7918	2.9168	10.7917	3.24895	10.7917	3.17885	10.792	3.23045	10.7917	3.06715
10.8002	2.8913	10.8	3.2273	10.8	3.1566	10.8003	3.20675	10.8	3.04075
10.8085	2.86665	10.8083	3.2082	10.8083	3.13335	10.8087	3.18465	10.8083	3.01375
10.8168	2.842	10.8167	3.1873	10.8167	3.1099	10.817	3.1614	10.8167	2.98785
10.8252	2.8169	10.825	3.16635	10.825	3.0859	10.8253	3.13695	10.825	2.96035
10.8335	2.7905	10.8333	3.1423	10.8333	3.05935	10.8337	3.10995	10.8333	2.9298
10.8418	2.7665	10.8417	3.12015	10.8417	3.0343	10.842	3.08485	10.8417	2.9014
10.8502	2.74145	10.85	3.09825	10.85	3.0084	10.8503	3.06085	10.85	2.87495
10.8585	2.71435	10.8583	3.07465	10.8583	2.98085	10.8587	3.03305	10.8583	2.84295
10.8668	2.6895	10.8667	3.0495	10.8667	2.95485	10.867	3.006	10.8667	2.81555
10.8752	2.66315	10.875	3.02465	10.875	2.92525	10.8753	2.9777	10.875	2.78495
10.8835	2.6353	10.8833	2.99665	10.8833	2.8958	10.8837	2.94725	10.8833	2.75395
10.8918	2.6083	10.8917	2.9703	10.8917	2.86645	10.892	2.91875	10.8917	2.72325
10.9002	2.5826	10.9	2.9443	10.9	2.83635	10.9003	2.8893	10.9	2.6933
10.9085	2.556	10.9083	2.91735	10.9083	2.8077	10.9087	2.8601	10.9083	2.66285
10.9168	2.53025	10.9167	2.88885	10.9167	2.77855	10.917	2.83095	10.9167	2.6316
10.9252	2.50455	10.925	2.8604	10.925	2.74835	10.9253	2.80125	10.925	2.6003
10.9335	2.48045	10.9333	2.8319	10.9333	2.7179	10.9337	2.7706	10.9333	2.56955
10.9418	2.45245	10.9417	2.802	10.9417	2.6874	10.942	2.7385	10.9417	2.538
10.9502	2.4269	10.95	2.772	10.95	2.657	10.9503	2.7084	10.95	2.50635
10.9585	2.40135	10.9583	2.7424	10.9583	2.6253	10.9587	2.67645	10.9583	2.47465
10.9668	2.37685	10.9667	2.71195	10.9667	2.593	10.967	2.6452	10.9667	2.4423
10.9752	2.3531	10.975	2.68175	10.975	2.56265	10.9753	2.6148	10.975	2.41115
10.9835	2.32935	10.9833	2.6511	10.9833	2.53235	10.9837	2.58335	10.9833	2.37765
10.9918	2.30575	10.9917	2.6213	10.9917	2.50145	10.992	2.55235	10.9917	2.34455
11.0002	2.2822	11	2.59125	11	2.4712	11.0003	2.5209	11	2.3126
11.0085	2.2574	11.0083	2.5617	11.0083	2.4378	11.0087	2.488	11.0083	2.28035
11.0168	2.23035	11.0167	2.5292	11.0167	2.40625	11.017	2.4555	11.0167	2.2458
11.0252	2.2048	11.025	2.49675	11.025	2.3731	11.0253	2.4231	11.025	2.2109
11.0335	2.1797	11.0333	2.46835	11.0333	2.3449	11.0337	2.39195	11.0333	2.17935
11.0418	2.15255	11.0417	2.43935	11.0417	2.3126	11.042	2.36165	11.0417	2.1464
11.0502	2.1234	11.05	2.4066	11.05	2.28065	11.0503	2.32825	11.05	2.1093
11.0585	2.09265	11.0583	2.37215	11.0583	2.2496	11.0587	2.2959	11.0583	2.0765
11.0668	2.0615	11.0667	2.34155	11.0667	2.21735	11.067	2.26385	11.0667	2.0418
11.0752	2.02595	11.075	2.30955	11.075	2.1845	11.0753	2.22995	11.075	2.0073
11.0835	1.99235	11.0833	2.2768	11.0833	2.15105	11.0837	2.196	11.0833	1.9714
11.0918	1.9571	11.0917	2.2449	11.0917	2.11935	11.092	2.1628	11.0917	1.9377
11.1002	1.9192	11.1	2.21375	11.1	2.08605	11.1003	2.1309	11.1	1.89995
11.1085	1.88095	11.1083	2.17885	11.1083	2.0524	11.1087	2.09715	11.1083	1.86475
11.1168	1.8432	11.1167	2.14655	11.1167	2.0499	11.117	2.0624	11.1167	1.8291
11.1252	1.8072	11.125	2.1165	11.125	1.9853	11.1253	2.02985	11.125	1.79475
11.1335	1.7655	11.1333	2.083	11.1333	1.95255	11.1337	1.99425	11.1333	1.75885
11.1418	1.72625	11.1417	2.0494	11.1417	1.92135	11.142	1.96185	11.1417	1.7238
11.1502	1.68525	11.15	2.01745	11.15	1.88695	11.1503	1.927	11.15	1.68795
11.1585	1.64505	11.1583	1.98305	11.1583	1.8518	11.1587	1.8933	11.1583	1.6507
11.1668	1.60795	11.1667	1.9515	11.1667	1.81905	11.167	1.8609	11.1667	1.6164
11.1752	1.56805	11.175	1.9173	11.175	1.78585	11.1753	1.8264	11.175	1.58025
11.1835	1.5292	11.1833	1.8837	11.1833	1.7533	11.1837	1.79345	11.1833	1.54525
11.1918	1.48965	11.1917	1.85055	11.1917	1.7194	11.192	1.75935	11.1917	1.5113
11.2002	1.4492	11.2	1.81645	11.2	1.6845	11.2003	1.7248	11.2	1.4759
11.2085	1.41055	11.2083	1.7814	11.2083	1.6517	11.2087	1.69155	11.2083	1.4414
11.2168	1.37185	11.2167	1.74775	11.2167	1.61735	11.217	1.65665	11.2167	1.40755
11.2252	1.33355	11.225	1.71405	11.225	1.5846	11.2253	1.62435	11.225	1.37505
11.2335	1.2948	11.2333	1.6812	11.2333	1.55155	11.2337	1.5905	11.2333	1.34165
11.2418	1.2569	11.2417	1.6465	11.2417	1.518	11.242	1.5569	11.2417	1.30595
11.2502	1.2216	11.25	1.61475	11.25	1.487	11.2503	1.5251	11.25	1.27665
11.2585	1.18615	11.2583	1.58065	11.2583	1.45225	11.2587	1.4918	11.2583	1.24345
11.2668	1.1476	11.2667	1.5455	11.2667	1.4189	11.267	1.45605	11.2667	1.2111
11.2752	1.1137	11.275	1.51405	11.275	1.38805	11.2753	1.4257	11.275	1.18145
11.2835	1.0787	11.2833	1.48165	11.2833	1.3568	11.2837	1.3927	11.2833	1.15165
11.2918	1.04245	11.2917	1.4484	11.2917	1.32405	11.292	1.3611	11.2917	1.12075
11.3002	1.00945	11.3	1.41445	11.3	1.29275	11.3003	1.3291	11.3	1.09195
11.3085	0.9771	11.3083	1.38105	11.3083	1.26035	11.3087	1.29735	11.3083	1.0629
11.3168	0.9447	11.3167	1.3489	11.3167	1.22875	11.317	1.2659	11.3167	1.03425
11.3252	0.9132	11.325	1.31765	11.325	1.1994	11.3253	1.23615	11.325	1.00745
11.3335	0.88235	11.3333	1.2854	11.3333	1.1672	11.3337	1.2049	11.3333	0.9802
11.3418	0.85285	11.3417	1.2544	11.3417	1.1386	11.342	1.17475	11.3417	0.95265
11.3502	0.8221	11.35	1.22395	11.35	1.1083	11.3503	1.14645	11.35	0.9265
11.3585	0.79405	11.3583	1.1928	11.3583	1.0787	11.3587	1.1174	11.3583	0.9022
11.3668	0.7674	11.3667	1.16245	11.3667	1.0498	11.367	1.0886	11.3667	0.8761
11.3752	0.7431	11.375	1.13395	11.375	1.02425	11.3753	1.0621	11.375	0.8542
11.3835	0.71685	11.3833	1.1069	11.3833	0.9966	11.3837	1.0356	11.3833	0.8324
11.3918	0.69065	11.3917	1.07685	11.3917	0.9684	11.392	1.00835	11.3917	0.809
11.4002	0.6675	11.4	1.0483	11.4	0.9425	11.4003	0.981	11.4	0.7868
11.4085	0.64285	11.4083	1.02055	11.4083	0.9147	11.4087	0.95475	11.4083	0.76525
11.4168	0.6218	11.4167	0.99615	11.4167	0.8912	11.417	0.9318	11.4167	0.74765
11.4252	0.6003	11.425	0.9678	11.425	0.8674	11.4253	0.9069	11.425	0.7257
11.4335	0.5778	11.4333	0.9421	11.4333	0.84165	11.4337	0.8824	11.4333	0.70525
11.4418	0.55835	11.4417	0.9164	11.4417	0.8176	11.442	0.8585	11.4417	0.6866
11.4502	0.53795	11.45	0.8926	11.45	0.7936	11.4503	0.8358	11.45	0.6671
11.4585	0.51985	11.4583	0.86865	11.4583	0.77145	11.4587	0.8139	11.4583	0.65165
11.4668	0.5015	11.4667	0.8465	11.4667	0.74935	11.467	0.79355	11.4667	0.63555
11.4752	0.4838	11.475	0.82365	11.475	0.7282	11.4753	0.7716	11.475	0.6178
11.4835	0.46795	11.4833	0.80295	11.4833	0.70745	11.4837	0.75155	11.4833	0.60265
11.4918	0.4518	11.4917	0.77875	11.4917	0.68725	11.492	0.73	11.4917	0.5858
11.5002	0.4372	11.5	0.75955	11.5	0.66725	11.5003	0.71115	11.5	0.57215
11.5085	0.42065	11.5083	0.74025	11.5083	0.64875	11.5087	0.6921	11.5083	0.55705
11.5168	0.40495	11.5167	0.7201	11.5167	0.6292	11.517	0.67395	11.5167	0.5431
11.5252	0.39045	11.525	0.7004	11.525	0.6124	11.5253	0.6559	11.525	0.52985
11.5335	0.37915	11.5333	0.6831	11.5333	0.5944	11.5337	0.63925	11.5333	0.51815
11.5418	0.36485	11.5417	0.6635	11.5417	0.5769	11.542	0.6225	11.5417	0.50445
11.5502	0.35335	11.55	0.64905	11.55	0.56215	11.5503	0.6086	11.55	0.4936
11.5585	0.3431	11.5583	0.6325	11.5583	0.54785	11.5587	0.5927	11.5583	0.4823
11.5668	0.33105	11.5667	0.61665	11.5667	0.53215	11.567	0.5784	11.5667	0.47005
11.5752	0.3195	11.575	0.5999	11.575	0.5173	11.5753	0.56365	11.575	0.4598
11.5835	0.3094	11.5833	0.5831	11.5833	0.50285	11.5837	0.54945	11.5833	0.44915
11.5918	0.30075	11.5917	0.57075	11.5917	0.4902	11.592	0.53615	11.5917	0.4395
11.6002	0.29195	11.6	0.5571	11.6	0.47695	11.6003	0.52445	11.6	0.43015
11.6085	0.2819	11.6083	0.54245	11.6083	0.4651	11.6087	0.511	11.6083	0.42105
11.6168	0.2721	11.6167	0.52805	11.6167	0.4531	11.617	0.4977	11.6167	0.4113
11.6252	0.265	11.625	0.5165	11.625	0.4437	11.6253	0.4886	11.625	0.40405
11.6335	0.2556	11.6333	0.50475	11.6333	0.43075	11.6337	0.47505	11.6333	0.3951
11.6418	0.24925	11.6417	0.4948	11.6417	0.42025	11.642	0.4662	11.6417	0.3884
11.6502	0.24065	11.65	0.4813	11.65	0.409	11.6503	0.45365	11.65	0.3811
11.6585	0.23295	11.6583	0.4718	11.6583	0.399	11.6587	0.444	11.6583	0.3743
11.6668	0.22625	11.6667	0.4602	11.6667	0.38915	11.667	0.4345	11.6667	0.36605
11.6752	0.2188	11.675	0.4504	11.675	0.38045	11.6753	0.42565	11.675	0.3603
11.6835	0.21245	11.6833	0.43915	11.6833	0.37035	11.6837	0.41495	11.6833	0.3518
11.6918	0.2063	11.6917	0.4307	11.6917	0.3616	11.692	0.4062	11.6917	0.3455
11.7002	0.2021	11.7	0.42205	11.7	0.35495	11.7003	0.399	11.7	0.3421
11.7085	0.196	11.7083	0.41315	11.7083	0.34815	11.7087	0.39155	11.7083	0.33775
11.7168	0.1889	11.7167	0.4035	11.7167	0.33845	11.717	0.3838	11.7167	0.33075
11.7252	0.184	11.725	0.39455	11.725	0.3311	11.7253	0.3761	11.725	0.3271
11.7335	0.1815	11.7333	0.3885	11.7333	0.3255	11.7337	0.37025	11.7333	0.32185
11.7418	0.1782	11.7417	0.38255	11.7417	0.32055	11.742	0.3646	11.7417	0.31745
11.7502	0.17325	11.75	0.3745	11.75	0.31395	11.7503	0.3579	11.75	0.31315
11.7585	0.168	11.7583	0.36575	11.7583	0.305	11.7587	0.34975	11.7583	0.30755
11.7668	0.16445	11.7667	0.3593	11.7667	0.30075	11.767	0.34525	11.7667	0.3032
11.7752	0.16145	11.775	0.35235	11.775	0.2955	11.7753	0.33995	11.775	0.30095
11.7835	0.15795	11.7833	0.34655	11.7833	0.29015	11.7837	0.3346	11.7833	0.2975
11.7918	0.1543	11.7917	0.33975	11.7917	0.2857	11.792	0.3286	11.7917	0.29405
11.8002	0.15165	11.8	0.33475	11.8	0.281	11.8003	0.3244	11.8	0.29075
11.8085	0.149	11.8083	0.32945	11.8083	0.2774	11.8087	0.31925	11.8083	0.2865
11.8168	0.1421	11.8167	0.32185	11.8167	0.27095	11.817	0.3125	11.8167	0.28225
11.8252	0.1413	11.825	0.318	11.825	0.2659	11.8253	0.30875	11.825	0.2793
11.8335	0.1379	11.8333	0.3133	11.8333	0.26125	11.8337	0.3045	11.8333	0.27645
11.8418	0.1363	11.8417	0.30845	11.8417	0.25765	11.842	0.3008	11.8417	0.2742
11.8502	0.1345	11.85	0.3049	11.85	0.2554	11.8503	0.2969	11.85	0.27355
11.8585	0.1302	11.8583	0.2991	11.8583	0.25025	11.8587	0.2932	11.8583	0.26855
11.8668	0.129	11.8667	0.29375	11.8667	0.2453	11.867	0.289	11.8667	0.26585
11.8752	0.12605	11.875	0.28985	11.875	0.24315	11.8753	0.2858	11.875	0.26355
11.8835	0.1237	11.8833	0.28585	11.8833	0.2383	11.8837	0.28015	11.8833	0.2599
11.8918	0.1199	11.8917	0.27945	11.8917	0.23425	11.892	0.27575	11.8917	0.25835
11.9002	0.11815	11.9	0.2764	11.9	0.23075	11.9003	0.27425	11.9	0.25635
11.9085	0.11755	11.9083	0.2732	11.9083	0.2287	11.9087	0.27125	11.9083	0.25425
11.9168	0.11695	11.9167	0.271	11.9167	0.2265	11.917	0.2693	11.9167	0.2541
11.9252	0.11335	11.925	0.2663	11.925	0.2225	11.9253	0.2651	11.925	0.24845
11.9335	0.11405	11.9333	0.2653	11.9333	0.22015	11.9337	0.26365	11.9333	0.2488
11.9418	0.1133	11.9417	0.26235	11.9417	0.21895	11.942	0.26315	11.9417	0.2485
11.9502	0.11165	11.95	0.2585	11.95	0.21315	11.9503	0.25775	11.95	0.2449
11.9585	0.1103	11.9583	0.2545	11.9583	0.21215	11.9587	0.258	11.9583	0.2446
11.9668	0.1077	11.9667	0.251	11.9667	0.20935	11.967	0.2544	11.9667	0.2429
11.9752	0.10675	11.975	0.2501	11.975	0.2067	11.9753	0.2514	11.975	0.24135
11.9835	0.1057	11.9833	0.24825	11.9833	0.20455	11.9837	0.2499	11.9833	0.2406
11.9918	0.10305	11.9917	0.2445	11.9917	0.20475	11.992	0.2463	11.9917	0.23645
12.0002	0.1023	12	0.24235	12	0.2023	12.0003	0.2456	12	0.23525
12.0085	0.09915	12.0083	0.2385	12.0083	0.199	12.0087	0.2403	12.0083	0.23385
12.0168	0.09895	12.0167	0.23545	12.0167	0.19735	12.017	0.23945	12.0167	0.23125
12.0252	0.09505	12.025	0.23095	12.025	0.1933	12.0253	0.2366	12.025	0.22815
12.0335	0.0953	12.0333	0.23095	12.0333	0.1925	12.0337	0.2348	12.0333	0.2293
12.0418	0.0922	12.0417	0.2297	12.0417	0.19025	12.042	0.23335	12.0417	0.2287
12.0502	0.0915	12.05	0.225	12.05	0.1889	12.0503	0.23075	12.05	0.2255
12.0585	0.08985	12.0583	0.22355	12.0583	0.18725	12.0587	0.22945	12.0583	0.22415
12.0668	0.08965	12.0667	0.2221	12.0667	0.18525	12.067	0.22755	12.0667	0.22325
12.0752	0.08805	12.075	0.22005	12.075	0.1822	12.0753	0.2257	12.075	0.2214
12.0835	0.08555	12.0833	0.2176	12.0833	0.1804	12.0837	0.22355	12.0833	0.2211
12.0918	0.08185	12.0917	0.2135	12.0917	0.17685	12.092	0.2186	12.0917	0.21675
12.1002	0.08265	12.1	0.21465	12.1	0.1747	12.1003	0.2201	12.1	0.21735
12.1085	0.0809	12.1083	0.2134	12.1083	0.1739	12.1087	0.21855	12.1083	0.216
12.1168	0.08145	12.1167	0.21075	12.1167	0.1747	12.117	0.2172	12.1167	0.21435
12.1252	0.0815	12.125	0.2099	12.125	0.17315	12.1253	0.21905	12.125	0.21355
12.1335	0.07985	12.1333	0.20755	12.1333	0.17125	12.1337	0.2147	12.1333	0.21275
12.1418	0.0777	12.1417	0.2032	12.1417	0.16935	12.142	0.2125	12.1417	0.2087
12.1502	0.0751	12.15	0.2027	12.15	0.16645	12.1503	0.2104	12.15	0.2081
12.1585	0.07685	12.1583	0.20325	12.1583	0.16725	12.1587	0.2102	12.1583	0.2085
12.1668	0.07665	12.1667	0.2014	12.1667	0.1659	12.167	0.20795	12.1667	0.20775
12.1752	0.07435	12.175	0.19995	12.175	0.16425	12.1753	0.2078	12.175	0.20585
12.1835	0.07485	12.1833	0.1977	12.1833	0.1645	12.1837	0.2073	12.1833	0.2043
12.1918	0.07345	12.1917	0.197	12.1917	0.16175	12.192	0.2054	12.1917	0.2039
12.2002	0.0709	12.2	0.19495	12.2	0.16105	12.2003	0.2034	12.2	0.20065
12.2085	0.06885	12.2083	0.1927	12.2083	0.16005	12.2087	0.20275	12.2083	0.19925
12.2168	0.0686	12.2167	0.1915	12.2167	0.1599	12.217	0.20165	12.2167	0.2001
12.2252	0.06555	12.225	0.1907	12.225	0.1567	12.2253	0.2002	12.225	0.19815
12.2335	0.0644	12.2333	0.18865	12.2333	0.15525	12.2337	0.1994	12.2333	0.19735
12.2418	0.0634	12.2417	0.18675	12.2417	0.15435	12.242	0.1975	12.2417	0.19565
12.2502	0.06475	12.25	0.18655	12.25	0.1539	12.2503	0.1958	12.25	0.1948
12.2585	0.0613	12.2583	0.1868	12.2583	0.1519	12.2587	0.19395	12.2583	0.1942
12.2668	0.06015	12.2667	0.18435	12.2667	0.15115	12.267	0.19155	12.2667	0.19375
12.2752	0.05775	12.275	0.1824	12.275	0.1475	12.2753	0.1895	12.275	0.1907
12.2835	0.05835	12.2833	0.1818	12.2833	0.14645	12.2837	0.1892	12.2833	0.1892
12.2918	0.0579	12.2917	0.1808	12.2917	0.14735	12.292	0.1901	12.2917	0.1885
12.3002	0.059	12.3	0.1817	12.3	0.1477	12.3003	0.1894	12.3	0.18855
12.3085	0.0579	12.3083	0.1787	12.3083	0.146	12.3087	0.1876	12.3083	0.18695
12.3168	0.0571	12.3167	0.17835	12.3167	0.1458	12.317	0.1882	12.3167	0.18565
12.3252	0.056	12.325	0.1767	12.325	0.1437	12.3253	0.18715	12.325	0.1854
12.3335	0.0544	12.3333	0.1761	12.3333	0.1419	12.3337	0.18545	12.3333	0.1826
12.3418	0.0565	12.3417	0.17785	12.3417	0.1458	12.342	0.18755	12.3417	0.1861
12.3502	0.05595	12.35	0.1749	12.35	0.1432	12.3503	0.18585	12.35	0.1838
12.3585	0.055	12.3583	0.17465	12.3583	0.14285	12.3587	0.18545	12.3583	0.1838
12.3668	0.05375	12.3667	0.1739	12.3667	0.14315	12.367	0.18585	12.3667	0.18155
12.3752	0.0526	12.375	0.1733	12.375	0.14175	12.3753	0.18255	12.375	0.18185
12.3835	0.05035	12.3833	0.17115	12.3833	0.14055	12.3837	0.18235	12.3833	0.17945
12.3918	0.05115	12.3917	0.1705	12.3917	0.14045	12.392	0.1821	12.3917	0.17805
12.4002	0.05	12.4	0.16975	12.4	0.1396	12.4003	0.1815	12.4	0.1788
12.4085	0.04755	12.4083	0.1699	12.4083	0.13725	12.4087	0.18025	12.4083	0.1778
12.4168	0.0474	12.4167	0.16875	12.4167	0.13795	12.417	0.18055	12.4167	0.17735
12.4252	0.04475	12.425	0.1678	12.425	0.1374	12.4253	0.18065	12.425	0.17575
12.4335	0.0445	12.4333	0.1673	12.4333	0.13665	12.4337	0.18025	12.4333	0.1744
12.4418	0.0446	12.4417	0.1686	12.4417	0.1385	12.442	0.181	12.4417	0.17525
12.4502	0.04385	12.45	0.16805	12.45	0.1384	12.4503	0.1835	12.45	0.1775
12.4585	0.04185	12.4583	0.1677	12.4583	0.1391	12.4587	0.18345	12.4583	0.17615
12.4668	0.04145	12.4667	0.16745	12.4667	0.14095	12.467	0.18435	12.4667	0.1775
12.4752	0.04135	12.475	0.1694	12.475	0.14105	12.4753	0.1866	12.475	0.178
12.4835	0.04185	12.4833	0.169	12.4833	0.1433	12.4837	0.1886	12.4833	0.1784
12.4918	0.0411	12.4917	0.17105	12.4917	0.14525	12.492	0.19025	12.4917	0.17765
12.5002	0.0424	12.5	0.17355	12.5	0.1482	12.5003	0.1939	12.5	0.18045
12.5085	0.04105	12.5083	0.17455	12.5083	0.14935	12.5087	0.19555	12.5083	0.18095
12.5168	0.0369	12.5167	0.1744	12.5167	0.1494	12.517	0.19775	12.5167	0.17885
12.5252	0.0378	12.525	0.175	12.525	0.1524	12.5253	0.2019	12.525	0.18115
12.5335	0.03985	12.5333	0.18005	12.5333	0.15875	12.5337	0.20785	12.5333	0.18655
12.5418	0.0367	12.5417	0.1797	12.5417	0.16045	12.542	0.20975	12.5417	0.1856
12.5502	0.0367	12.55	0.1828	12.55	0.16425	12.5503	0.2129	12.55	0.1889
12.5585	0.0356	12.5583	0.18585	12.5583	0.16875	12.5587	0.21895	12.5583	0.1903
12.5668	0.03705	12.5667	0.18905	12.5667	0.17275	12.567	0.2227	12.5667	0.19355
12.5752	0.03475	12.575	0.19105	12.575	0.17695	12.5753	0.2281	12.575	0.1966
12.5835	0.0339	12.5833	0.1951	12.5833	0.1822	12.5837	0.2337	12.5833	0.19965
12.5918	0.0317	12.5917	0.1993	12.5917	0.187	12.592	0.23895	12.5917	0.2043
12.6002	0.0314	12.6	0.20415	12.6	0.19195	12.6003	0.24565	12.6	0.2092
12.6085	0.0306	12.6083	0.20875	12.6083	0.1982	12.6087	0.2511	12.6083	0.2128
12.6168	0.0298	12.6167	0.21305	12.6167	0.20365	12.617	0.2569	12.6167	0.21765
12.6252	0.03155	12.625	0.22135	12.625	0.21095	12.6253	0.26365	12.625	0.22385
12.6335	0.0292	12.6333	0.2256	12.6333	0.21685	12.6337	0.26755	12.6333	0.2293
12.6418	0.02865	12.6417	0.2316	12.6417	0.22095	12.642	0.2747	12.6417	0.235
12.6502	0.02785	12.65	0.2378	12.65	0.2267	12.6503	0.28085	12.65	0.2414
12.6585	0.0292	12.6583	0.24355	12.6583	0.23385	12.6587	0.28775	12.6583	0.2491
12.6668	0.0284	12.6667	0.2512	12.6667	0.2414	12.667	0.29525	12.6667	0.25635
12.6752	0.02735	12.675	0.2564	12.675	0.24705	12.6753	0.30265	12.675	0.26315
12.6835	0.0294	12.6833	0.26395	12.6833	0.2542	12.6837	0.30855	12.6833	0.27055
12.6918	0.0303	12.6917	0.27045	12.6917	0.26065	12.692	0.3152	12.6917	0.27765
12.7002	0.0287	12.7	0.2755	12.7	0.26645	12.7003	0.3209	12.7	0.2851
12.7085	0.02915	12.7083	0.28185	12.7083	0.27155	12.7087	0.32805	12.7083	0.2911
12.7168	0.0315	12.7167	0.28795	12.7167	0.279	12.717	0.33485	12.7167	0.30045
12.7252	0.031	12.725	0.2942	12.725	0.2841	12.7253	0.34175	12.725	0.30845
12.7335	0.0322	12.7333	0.30285	12.7333	0.29185	12.7337	0.3472	12.7333	0.3175
12.7418	0.03235	12.7417	0.30635	12.7417	0.29715	12.742	0.35135	12.7417	0.3212
12.7502	0.03345	12.75	0.31315	12.75	0.30265	12.7503	0.35685	12.75	0.32875
12.7585	0.0342	12.7583	0.31875	12.7583	0.30835	12.7587	0.3617	12.7583	0.33625
12.7668	0.03595	12.7667	0.3233	12.7667	0.3125	12.767	0.3655	12.7667	0.34235
12.7752	0.0377	12.775	0.3306	12.775	0.3177	12.7753	0.36955	12.775	0.3509
12.7835	0.03835	12.7833	0.3361	12.7833	0.3223	12.7837	0.37455	12.7833	0.35695
12.7918	0.0425	12.7917	0.34065	12.7917	0.32755	12.792	0.37935	12.7917	0.3635
12.8002	0.04445	12.8	0.3449	12.8	0.33245	12.8003	0.3824	12.8	0.3694
12.8085	0.0489	12.8083	0.3506	12.8083	0.33555	12.8087	0.3858	12.8083	0.3742
12.8168	0.05435	12.8167	0.3581	12.8167	0.3413	12.817	0.39145	12.8167	0.38125
12.8252	0.0584	12.825	0.36015	12.825	0.3427	12.8253	0.39395	12.825	0.38595
12.8335	0.0616	12.8333	0.3632	12.8333	0.3469	12.8337	0.3963	12.8333	0.38995
12.8418	0.06795	12.8417	0.3678	12.8417	0.3509	12.842	0.3991	12.8417	0.39475
12.8502	0.0728	12.85	0.37415	12.85	0.3539	12.8503	0.40335	12.85	0.3993
12.8585	0.08075	12.8583	0.3768	12.8583	0.35565	12.8587	0.4066	12.8583	0.4017
12.8668	0.08675	12.8667	0.37895	12.8667	0.3592	12.867	0.4086	12.8667	0.4044
12.8752	0.09585	12.875	0.383	12.875	0.36175	12.8753	0.41035	12.875	0.40795
12.8835	0.1008	12.8833	0.3828	12.8833	0.3615	12.8837	0.4121	12.8833	0.40915
12.8918	0.10905	12.8917	0.3867	12.8917	0.3629	12.892	0.41415	12.8917	0.41105
12.9002	0.11655	12.9	0.3879	12.9	0.36565	12.9003	0.41505	12.9	0.41405
12.9085	0.12485	12.9083	0.39195	12.9083	0.36795	12.9087	0.4167	12.9083	0.41525
12.9168	0.13375	12.9167	0.39385	12.9167	0.36955	12.917	0.4183	12.9167	0.41925
12.9252	0.14285	12.925	0.3953	12.925	0.3715	12.9253	0.4195	12.925	0.4203
12.9335	0.14985	12.9333	0.3951	12.9333	0.37165	12.9337	0.4204	12.9333	0.4203
12.9418	0.158	12.9417	0.3977	12.9417	0.37195	12.942	0.42025	12.9417	0.41915
12.9502	0.16745	12.95	0.39915	12.95	0.3732	12.9503	0.42195	12.95	0.42225
12.9585	0.17405	12.9583	0.40025	12.9583	0.3739	12.9587	0.4224	12.9583	0.42285
12.9668	0.1805	12.9667	0.39975	12.9667	0.37405	12.967	0.41985	12.9667	0.4248
12.9752	0.18855	12.975	0.4005	12.975	0.37545	12.9753	0.42	12.975	0.42515
12.9835	0.19585	12.9833	0.40205	12.9833	0.3755	12.9837	0.42205	12.9833	0.42565
12.9918	0.2027	12.9917	0.402	12.9917	0.37455	12.992	0.42105	12.9917	0.4247
13.0002	0.20965	13	0.4017	13	0.3743	13.0003	0.4194	13	0.42625
13.0085	0.2167	13.0083	0.40285	13.0083	0.37485	13.0087	0.4212	13.0083	0.428
13.0168	0.2211	13.0167	0.4038	13.0167	0.37555	13.017	0.42025	13.0167	0.42985
13.0252	0.2262	13.025	0.4024	13.025	0.3744	13.0253	0.4199	13.025	0.42955
13.0335	0.23165	13.0333	0.4035	13.0333	0.3759	13.0337	0.4211	13.0333	0.43135
13.0418	0.23695	13.0417	0.4047	13.0417	0.3768	13.042	0.4222	13.0417	0.43195
13.0502	0.2419	13.05	0.4046	13.05	0.37595	13.0503	0.42285	13.05	0.43405
13.0585	0.2465	13.0583	0.4039	13.0583	0.3766	13.0587	0.42345	13.0583	0.43375
13.0668	0.2512	13.0667	0.4056	13.0667	0.37795	13.067	0.4243	13.0667	0.43705
13.0752	0.2529	13.075	0.40455	13.075	0.3768	13.0753	0.42375	13.075	0.4341
13.0835	0.25715	13.0833	0.4038	13.0833	0.37705	13.0837	0.4247	13.0833	0.43475
13.0918	0.25895	13.0917	0.40515	13.0917	0.3779	13.092	0.4237	13.0917	0.43425
13.1002	0.26205	13.1	0.4042	13.1	0.3779	13.1003	0.4262	13.1	0.4365
13.1085	0.26335	13.1083	0.40455	13.1083	0.3792	13.1087	0.42585	13.1083	0.4359
13.1168	0.26475	13.1167	0.4036	13.1167	0.37995	13.117	0.4268	13.1167	0.43475
13.1252	0.26775	13.125	0.40535	13.125	0.38255	13.1253	0.42835	13.125	0.4364
13.1335	0.26775	13.1333	0.40525	13.1333	0.38125	13.1337	0.4259	13.1333	0.4347
13.1418	0.26825	13.1417	0.4054	13.1417	0.3807	13.142	0.42455	13.1417	0.4327
13.1502	0.26805	13.15	0.40635	13.15	0.3814	13.1503	0.42575	13.15	0.43075
13.1585	0.2682	13.1583	0.4067	13.1583	0.3826	13.1587	0.4245	13.1583	0.42795
13.1668	0.2684	13.1667	0.4081	13.1667	0.3823	13.167	0.42485	13.1667	0.4254
13.1752	0.26705	13.175	0.40725	13.175	0.3794	13.1753	0.42315	13.175	0.41985
13.1835	0.271	13.1833	0.4118	13.1833	0.3848	13.1837	0.42705	13.1833	0.4196
13.1918	0.2696	13.1917	0.41285	13.1917	0.38385	13.192	0.4257	13.1917	0.4139
13.2002	0.2647	13.2	0.41015	13.2	0.37865	13.2003	0.42015	13.2	0.40405
13.2085	0.2596	13.2083	0.4072	13.2083	0.37475	13.2087	0.41605	13.2083	0.39515
13.2168	0.2485	13.2167	0.39765	13.2167	0.36245	13.217	0.40415	13.2167	0.3761
13.2252	0.2515	13.225	0.4054	13.225	0.3683	13.2253	0.4099	13.225	0.37575
13.2335	0.2535	13.2333	0.4098	13.2333	0.3709	13.2337	0.4139	13.2333	0.3736
13.2418	0.2478	13.2417	0.40435	13.2417	0.364	13.242	0.40575	13.2417	0.36005
13.2502	0.2399	13.25	0.39905	13.25	0.35625	13.2503	0.39645	13.25	0.34405
13.2585	0.2316	13.2583	0.39595	13.2583	0.34785	13.2587	0.3903	13.2583	0.33195
13.2668	0.22305	13.2667	0.392	13.2667	0.33995	13.267	0.3812	13.2667	0.31915
13.2752	0.2148	13.275	0.3859	13.275	0.33235	13.2753	0.37375	13.275	0.3065
13.2835	0.2067	13.2833	0.38285	13.2833	0.325	13.2837	0.36475	13.2833	0.2955
13.2918	0.19665	13.2917	0.37925	13.2917	0.316	13.292	0.35735	13.2917	0.28555
13.3002	0.1857	13.3	0.36975	13.3	0.3042	13.3003	0.34435	13.3	0.2714
13.3085	0.17585	13.3083	0.36325	13.3083	0.2951	13.3087	0.33475	13.3083	0.25865
13.3168	0.16415	13.3167	0.35645	13.3167	0.2841	13.317	0.32375	13.3167	0.24945
13.3252	0.1523	13.325	0.3443	13.325	0.27185	13.3253	0.311	13.325	0.23735
13.3335	0.141	13.3333	0.33575	13.3333	0.26035	13.3337	0.29965	13.3333	0.2286
13.3418	0.1298	13.3417	0.3252	13.3417	0.24875	13.342	0.2884	13.3417	0.2209
13.3502	0.11965	13.35	0.31515	13.35	0.23765	13.3503	0.2753	13.35	0.21315
13.3585	0.1067	13.3583	0.3032	13.3583	0.2248	13.3587	0.26355	13.3583	0.20545
13.3668	0.0974	13.3667	0.2921	13.3667	0.2142	13.367	0.25245	13.3667	0.1991
13.3752	0.08695	13.375	0.2818	13.375	0.2022	13.3753	0.2417	13.375	0.19265
13.3835	0.07915	13.3833	0.26945	13.3833	0.19115	13.3837	0.23135	13.3833	0.18755
13.3918	0.0688	13.3917	0.2561	13.3917	0.18215	13.392	0.22025	13.3917	0.1821
13.4002	0.06275	13.4	0.24575	13.4	0.17365	13.4003	0.2123	13.4	0.1796
13.4085	0.0569	13.4083	0.2362	13.4083	0.1652	13.4087	0.20445	13.4083	0.17575
13.4168	0.0501	13.4167	0.2252	13.4167	0.1558	13.417	0.19615	13.4167	0.1707
13.4252	0.04585	13.425	0.21365	13.425	0.1491	13.4253	0.18965	13.425	0.16795
13.4335	0.0408	13.4333	0.2063	13.4333	0.1433	13.4337	0.18405	13.4333	0.16555
13.4418	0.03665	13.4417	0.1953	13.4417	0.13675	13.442	0.17765	13.4417	0.1626
13.4502	0.03325	13.45	0.18735	13.45	0.13065	13.4503	0.1729	13.45	0.15975
13.4585	0.0318	13.4583	0.17865	13.4583	0.1254	13.4587	0.16795	13.4583	0.1576
13.4668	0.029	13.4667	0.17195	13.4667	0.12355	13.467	0.16385	13.4667	0.1558
13.4752	0.02675	13.475	0.1661	13.475	0.11975	13.4753	0.1615	13.475	0.1554
13.4835	0.02345	13.4833	0.16235	13.4833	0.1162	13.4837	0.15815	13.4833	0.15345
13.4918	0.02195	13.4917	0.15625	13.4917	0.11495	13.492	0.15385	13.4917	0.1513
13.5002	0.02165	13.5	0.1507	13.5	0.11185	13.5003	0.15165	13.5	0.1491
13.5085	0.0184	13.5083	0.14715	13.5083	0.1094	13.5087	0.1494	13.5083	0.1484
13.5168	0.01585	13.5167	0.1421	13.5167	0.1068	13.517	0.1464	13.5167	0.14675
13.5252	0.01505	13.525	0.13895	13.525	0.10565	13.5253	0.14515	13.525	0.14605
13.5335	0.01545	13.5333	0.1382	13.5333	0.1042	13.5337	0.1422	13.5333	0.14515
13.5418	0.01375	13.5417	0.135	13.5417	0.1017	13.542	0.14235	13.5417	0.1439
13.5502	0.011	13.55	0.13295	13.55	0.10025	13.5503	0.1414	13.55	0.143
13.5585	0.012	13.5583	0.1321	13.5583	0.0987	13.5587	0.1393	13.5583	0.143
13.5668	0.0098	13.5667	0.1302	13.5667	0.09755	13.567	0.13795	13.5667	0.1413
13.5752	0.00985	13.575	0.12845	13.575	0.09685	13.5753	0.13605	13.575	0.14185
13.5835	0.0094	13.5833	0.1276	13.5833	0.09565	13.5837	0.13535	13.5833	0.14185
13.5918	0.0078	13.5917	0.1243	13.5917	0.0953	13.592	0.13405	13.5917	0.1414
13.6002	0.00915	13.6	0.1247	13.6	0.09415	13.6003	0.13445	13.6	0.14105
13.6085	0.008	13.6083	0.12385	13.6083	0.09455	13.6087	0.1335	13.6083	0.14135
13.6168	0.0084	13.6167	0.1219	13.6167	0.09335	13.617	0.13335	13.6167	0.1394
13.6252	0.00915	13.625	0.12265	13.625	0.0932	13.6253	0.1333	13.625	0.1414
13.6335	0.0084	13.6333	0.12275	13.6333	0.0914	13.6337	0.1326	13.6333	0.13945
13.6418	0.0083	13.6417	0.11885	13.6417	0.08965	13.642	0.13115	13.6417	0.1373
13.6502	0.00745	13.65	0.118	13.65	0.09045	13.6503	0.1323	13.65	0.13795
13.6585	0.00865	13.6583	0.11805	13.6583	0.0914	13.6587	0.13365	13.6583	0.1384
13.6668	0.0091	13.6667	0.1179	13.6667	0.0909	13.667	0.1323	13.6667	0.13875
13.6752	0.0099	13.675	0.1182	13.675	0.09065	13.6753	0.1331	13.675	0.1367
13.6835	0.009	13.6833	0.1148	13.6833	0.09085	13.6837	0.1307	13.6833	0.13715
13.6918	0.0073	13.6917	0.11445	13.6917	0.0891	13.692	0.1302	13.6917	0.13625
13.7002	0.00655	13.7	0.1126	13.7	0.08755	13.7003	0.1277	13.7	0.13535
13.7085	0.00575	13.7083	0.1121	13.7083	0.0866	13.7087	0.1278	13.7083	0.13525
13.7168	0.0046	13.7167	0.11075	13.7167	0.08625	13.717	0.12755	13.7167	0.13575
13.7252	0.0048	13.725	0.1124	13.725	0.0854	13.7253	0.1252	13.725	0.1349
13.7335	0.0028	13.7333	0.1107	13.7333	0.08365	13.7337	0.125	13.7333	0.13345
13.7418	0.0042	13.7417	0.11075	13.7417	0.0849	13.742	0.12365	13.7417	0.1338
13.7502	0.0051	13.75	0.11035	13.75	0.08435	13.7503	0.1254	13.75	0.13415
13.7585	0.00305	13.7583	0.1097	13.7583	0.0823	13.7587	0.12195	13.7583	0.13355
13.7668	0.00225	13.7667	0.1102	13.7667	0.0822	13.767	0.1227	13.7667	0.13415
13.7752	0.0024	13.775	0.10955	13.775	0.08055	13.7753	0.12085	13.775	0.13365
13.7835	0.00425	13.7833	0.1111	13.7833	0.0823	13.7837	0.1229	13.7833	0.1339
13.7918	0.0003	13.7917	0.10845	13.7917	0.08105	13.792	0.1202	13.7917	0.13235
13.8002	0.00255	13.8	0.1108	13.8	0.0813	13.8003	0.1234	13.8	0.1331
13.8085	0.00245	13.8083	0.1113	13.8083	0.08165	13.8087	0.12205	13.8083	0.1333
13.8168	0.00325	13.8167	0.11085	13.8167	0.0802	13.817	0.1224	13.8167	0.13365
13.8252	0.00365	13.825	0.11125	13.825	0.0802	13.8253	0.124	13.825	0.13295
13.8335	0.0025	13.8333	0.1093	13.8333	0.0796	13.8337	0.1223	13.8333	0.1322
13.8418	0.0019	13.8417	0.10855	13.8417	0.07815	13.842	0.12115	13.8417	0.13315
13.8502	0.00375	13.85	0.10905	13.85	0.07865	13.8503	0.12275	13.85	0.13335
13.8585	0.0043	13.8583	0.1101	13.8583	0.0788	13.8587	0.12095	13.8583	0.13225
13.8668	0.00055	13.8667	0.107	13.8667	0.078	13.867	0.1206	13.8667	0.1302
13.8752	0.0023	13.875	0.10845	13.875	0.07885	13.8753	0.1205	13.875	0.1322
13.8835	0.0017	13.8833	0.10655	13.8833	0.07855	13.8837	0.11895	13.8833	0.132
13.8918	-0.00075	13.8917	0.1055	13.8917	0.0783	13.892	0.11995	13.8917	0.1313
13.9002	-0.0006	13.9	0.1069	13.9	0.07895	13.9003	0.11885	13.9	0.13085
13.9085	5e-05	13.9083	0.1074	13.9083	0.0787	13.9087	0.1187	13.9083	0.1314
13.9168	-0.00235	13.9167	0.10805	13.9167	0.0765	13.917	0.11845	13.9167	0.13045
13.9252	-0.00225	13.925	0.10885	13.925	0.0769	13.9253	0.11865	13.925	0.1307
13.9335	-0.0023	13.9333	0.10725	13.9333	0.07495	13.9337	0.1184	13.9333	0.1301
13.9418	-0.0037	13.9417	0.1065	13.9417	0.07505	13.942	0.1164	13.9417	0.12875
13.9502	-0.00355	13.95	0.10725	13.95	0.0763	13.9503	0.1158	13.95	0.1294
13.9585	-0.00325	13.9583	0.10815	13.9583	0.07705	13.9587	0.1169	13.9583	0.12995
13.9668	-0.00305	13.9667	0.1083	13.9667	0.07625	13.967	0.11715	13.9667	0.13025
13.9752	-0.00385	13.975	0.1076	13.975	0.076	13.9753	0.11735	13.975	0.12935
13.9835	-0.0041	13.9833	0.1074	13.9833	0.075	13.9837	0.11675	13.9833	0.1262
13.9918	-0.00395	13.9917	0.1073	13.9917	0.07445	13.992	0.11835	13.9917	0.12925
14.0002	-0.00355	14	0.1086	14	0.0757	14.0003	0.1171	14	0.1282
14.0085	-0.00365	14.0083	0.1081	14.0083	0.07505	14.0087	0.1189	14.0083	0.1289
14.0168	-0.0085	14.0167	0.10495	14.0167	0.07335	14.017	0.1171	14.0167	0.1257
14.0252	-0.0049	14.025	0.10585	14.025	0.07445	14.0253	0.11755	14.025	0.126
14.0335	-0.0051	14.0333	0.10685	14.0333	0.0747	14.0337	0.119	14.0333	0.1274
14.0418	-0.00355	14.0417	0.1076	14.0417	0.07595	14.042	0.11895	14.0417	0.128
14.0502	-0.0009	14.05	0.1098	14.05	0.07625	14.0503	0.11965	14.05	0.13
14.0585	-0.00285	14.0583	0.10805	14.0583	0.07655	14.0587	0.119	14.0583	0.12795
14.0668	-0.0038	14.0667	0.1066	14.0667	0.07595	14.067	0.1173	14.0667	0.12735
14.0752	-0.0047	14.075	0.10765	14.075	0.07595	14.0753	0.1174	14.075	0.12605
14.0835	-0.00385	14.0833	0.10705	14.0833	0.0773	14.0837	0.11835	14.0833	0.126
14.0918	-0.00675	14.0917	0.10485	14.0917	0.075	14.092	0.1165	14.0917	0.1254
14.1002	-0.00685	14.1	0.1043	14.1	0.0751	14.1003	0.1167	14.1	0.1258
14.1085	-0.0066	14.1083	0.10615	14.1083	0.0752	14.1087	0.11745	14.1083	0.12645
14.1168	-0.00525	14.1167	0.10715	14.1167	0.07625	14.117	0.11855	14.1167	0.12685
14.1252	-0.00645	14.125	0.10635	14.125	0.07395	14.1253	0.11805	14.125	0.12475
14.1335	-0.006	14.1333	0.1076	14.1333	0.07485	14.1337	0.1163	14.1333	0.1268
14.1418	-0.0081	14.1417	0.1058	14.1417	0.0745	14.142	0.1175	14.1417	0.1251
14.1502	-0.0089	14.15	0.1046	14.15	0.07245	14.1503	0.11575	14.15	0.12295
14.1585	-0.00975	14.1583	0.1041	14.1583	0.07305	14.1587	0.1159	14.1583	0.1241
14.1668	-0.01095	14.1667	0.1025	14.1667	0.0723	14.167	0.11625	14.1667	0.1233
14.1752	-0.0101	14.175	0.10375	14.175	0.0717	14.1753	0.1158	14.175	0.12335
14.1835	-0.0091	14.1833	0.10485	14.1833	0.0732	14.1837	0.11835	14.1833	0.1242
14.1918	-0.00905	14.1917	0.1053	14.1917	0.0727	14.192	0.1165	14.1917	0.12455
14.2002	-0.00895	14.2	0.1039	14.2	0.07215	14.2003	0.11785	14.2	0.12295
14.2085	-0.0086	14.2083	0.1032	14.2083	0.07235	14.2087	0.11885	14.2083	0.12335
14.2168	-0.0086	14.2167	0.10185	14.2167	0.0712	14.217	0.1184	14.2167	0.12325
14.2252	-0.00995	14.225	0.1016	14.225	0.073	14.2253	0.12	14.225	0.1243
14.2335	-0.00875	14.2333	0.10375	14.2333	0.0729	14.2337	0.1195	14.2333	0.12475
14.2418	-0.0097	14.2417	0.10335	14.2417	0.07275	14.242	0.11925	14.2417	0.12365
14.2502	-0.0106	14.25	0.1024	14.25	0.07235	14.2503	0.11895	14.25	0.12265
14.2585	-0.0116	14.2583	0.1002	14.2583	0.07045	14.2587	0.11785	14.2583	0.12185
14.2668	-0.0107	14.2667	0.1019	14.2667	0.0714	14.267	0.11845	14.2667	0.12165
14.2752	-0.0138	14.275	0.0993	14.275	0.06945	14.2753	0.1167	14.275	0.1198
14.2835	-0.0145	14.2833	0.09855	14.2833	0.0682	14.2837	0.11465	14.2833	0.11845
14.2918	-0.01165	14.2917	0.1003	14.2917	0.06985	14.292	0.1149	14.2917	0.1199
14.3002	-0.0143	14.3	0.0986	14.3	0.06735	14.3003	0.11635	14.3	0.11875
14.3085	-0.0106	14.3083	0.0988	14.3083	0.0684	14.3087	0.1136	14.3083	0.1184
14.3168	-0.01675	14.3167	0.099	14.3167	0.0676	14.317	0.1133	14.3167	0.1184
14.3252	-0.0181	14.325	0.09825	14.325	0.0654	14.3253	0.11255	14.325	0.1171
14.3335	-0.01305	14.3333	0.0978	14.3333	0.06655	14.3337	0.11295	14.3333	0.1176
14.3418	-0.02695	14.3417	0.0973	14.3417	0.0649	14.342	0.1114	14.3417	0.11575
14.3502	-0.018	14.35	0.0981	14.35	0.0662	14.3503	0.113	14.35	0.1164
14.3585	-0.0177	14.3583	0.0976	14.3583	0.0661	14.3587	0.11415	14.3583	0.11615
14.3668	-0.01565	14.3667	0.09965	14.3667	0.0666	14.367	0.11305	14.3667	0.1167
14.3752	-0.0112	14.375	0.09825	14.375	0.0662	14.3753	0.11225	14.375	0.1168
14.3835	-0.01175	14.3833	0.09875	14.3833	0.06645	14.3837	0.11315	14.3833	0.11445
14.3918	-0.0154	14.3917	0.09755	14.3917	0.066	14.392	0.11195	14.3917	0.111
14.4002	-0.01385	14.4	0.09715	14.4	0.0663	14.4003	0.1132	14.4	0.1104
14.4085	-0.01395	14.4083	0.0971	14.4083	0.06595	14.4087	0.11295	14.4083	0.1127
14.4168	-0.01315	14.4167	0.0979	14.4167	0.0681	14.417	0.1123	14.4167	0.11285
14.4252	-0.0134	14.425	0.0976	14.425	0.06645	14.4253	0.1124	14.425	0.1106
14.4335	-0.0149	14.4333	0.0951	14.4333	0.06685	14.4337	0.1112	14.4333	0.11135
14.4418	-0.01365	14.4417	0.09685	14.4417	0.06745	14.442	0.11185	14.4417	0.1126
14.4502	-0.01425	14.45	0.0966	14.45	0.06715	14.4503	0.1112	14.45	0.11175
14.4585	-0.01375	14.4583	0.096	14.4583	0.06735	14.4587	0.1105	14.4583	0.11145
14.4668	-0.0148	14.4667	0.0951	14.4667	0.06765	14.467	0.11065	14.4667	0.11285
14.4752	-0.01405	14.475	0.09515	14.475	0.06715	14.4753	0.1099	14.475	0.1128
14.4835	-0.01465	14.4833	0.0952	14.4833	0.0676	14.4837	0.10925	14.4833	0.11325
14.4918	-0.0149	14.4917	0.09455	14.4917	0.0667	14.492	0.10795	14.4917	0.11295
14.5002	-0.01435	14.5	0.09535	14.5	0.0667	14.5003	0.1082	14.5	0.11195
14.5085	-0.01635	14.5083	0.09295	14.5083	0.06595	14.5087	0.1061	14.5083	0.1114
14.5168	-0.0167	14.5167	0.09425	14.5167	0.0665	14.517	0.107	14.5167	0.11305
14.5252	-0.01535	14.525	0.09445	14.525	0.0672	14.5253	0.10725	14.525	0.1134
14.5335	-0.01515	14.5333	0.09545	14.5333	0.0677	14.5337	0.1088	14.5333	0.1143
14.5418	-0.01265	14.5417	0.095	14.5417	0.0671	14.542	0.10755	14.5417	0.11505
14.5502	-0.0118	14.55	0.0963	14.55	0.06835	14.5503	0.10945	14.55	0.11605
14.5585	-0.0122	14.5583	0.09565	14.5583	0.067	14.5587	0.10805	14.5583	0.114
14.5668	-0.0134	14.5667	0.0956	14.5667	0.06885	14.567	0.10955	14.5667	0.11515
14.5752	-0.00975	14.575	0.0974	14.575	0.0689	14.5753	0.1119	14.575	0.11775
14.5835	-0.01195	14.5833	0.09555	14.5833	0.06785	14.5837	0.10995	14.5833	0.11425
14.5918	-0.0111	14.5917	0.0961	14.5917	0.0692	14.592	0.10975	14.5917	0.11555
14.6002	-0.01025	14.6	0.09565	14.6	0.06935	14.6003	0.1096	14.6	0.1155
14.6085	-0.00885	14.6083	0.0959	14.6083	0.0702	14.6087	0.11035	14.6083	0.11695
14.6168	-0.00925	14.6167	0.0969	14.6167	0.07115	14.617	0.1099	14.6167	0.1157
14.6252	-0.0075	14.625	0.09715	14.625	0.0704	14.6253	0.111	14.625	0.11565
14.6335	-0.0106	14.6333	0.0954	14.6333	0.06915	14.6337	0.1093	14.6333	0.1146
14.6418	-0.00925	14.6417	0.0954	14.6417	0.0682	14.642	0.1091	14.6417	0.11475
14.6502	-0.00975	14.65	0.09645	14.65	0.0692	14.6503	0.1083	14.65	0.11525
14.6585	-0.0107	14.6583	0.09585	14.6583	0.0688	14.6587	0.1095	14.6583	0.11575
14.6668	-0.0106	14.6667	0.0963	14.6667	0.0684	14.667	0.10715	14.6667	0.1136
14.6752	-0.01195	14.675	0.0956	14.675	0.0692	14.6753	0.10865	14.675	0.11445
14.6835	-0.0103	14.6833	0.0975	14.6833	0.06955	14.6837	0.1088	14.6833	0.11465
14.6918	-0.01245	14.6917	0.09615	14.6917	0.0684	14.692	0.1059	14.6917	0.1139
14.7002	-0.01245	14.7	0.09735	14.7	0.0679	14.7003	0.10745	14.7	0.1151
14.7085	-0.0136	14.7083	0.0963	14.7083	0.0667	14.7087	0.10525	14.7083	0.11385
14.7168	-0.01215	14.7167	0.0984	14.7167	0.0677	14.717	0.10615	14.7167	0.11535
14.7252	-0.01205	14.725	0.09835	14.725	0.0666	14.7253	0.10625	14.725	0.1158
14.7335	-0.01345	14.7333	0.0993	14.7333	0.06625	14.7337	0.1069	14.7333	0.1157
14.7418	-0.01165	14.7417	0.0986	14.7417	0.06655	14.742	0.10645	14.7417	0.1155
14.7502	-0.01045	14.75	0.09945	14.75	0.0675	14.7503	0.10715	14.75	0.1163
14.7585	-0.01275	14.7583	0.0983	14.7583	0.06605	14.7587	0.10605	14.7583	0.11405
14.7668	-0.0131	14.7667	0.09795	14.7667	0.06295	14.767	0.10575	14.7667	0.11505
14.7752	-0.01345	14.775	0.0971	14.775	0.0637	14.7753	0.10435	14.775	0.1134
14.7835	-0.0143	14.7833	0.09735	14.7833	0.0636	14.7837	0.1031	14.7833	0.1131
14.7918	-0.01375	14.7917	0.09765	14.7917	0.06315	14.792	0.10475	14.7917	0.1135
14.8002	-0.0129	14.8	0.0987	14.8	0.0643	14.8003	0.10455	14.8	0.1136
14.8085	-0.01255	14.8083	0.0992	14.8083	0.0662	14.8087	0.1047	14.8083	0.11425
14.8168	-0.01395	14.8167	0.0985	14.8167	0.06305	14.817	0.1035	14.8167	0.11265
14.8252	-0.0145	14.825	0.09635	14.825	0.06165	14.8253	0.1031	14.825	0.11195
14.8335	-0.0155	14.8333	0.0968	14.8333	0.0636	14.8337	0.1025	14.8333	0.11265
14.8418	-0.01605	14.8417	0.09625	14.8417	0.0625	14.842	0.10095	14.8417	0.1116
14.8502	-0.0171	14.85	0.09625	14.85	0.0613	14.8503	0.1019	14.85	0.1109
14.8585	-0.0192	14.8583	0.09605	14.8583	0.0613	14.8587	0.10095	14.8583	0.10915
14.8668	-0.01665	14.8667	0.09585	14.8667	0.05995	14.867	0.0996	14.8667	0.1104
14.8752	-0.01645	14.875	0.0952	14.875	0.06035	14.8753	0.10005	14.875	0.11115
14.8835	-0.0178	14.8833	0.09535	14.8833	0.05925	14.8837	0.1008	14.8833	0.11135
14.8918	-0.01895	14.8917	0.09645	14.8917	0.05865	14.892	0.0996	14.8917	0.11035
14.9002	-0.01765	14.9	0.0958	14.9	0.0601	14.9003	0.1001	14.9	0.10965
14.9085	-0.0193	14.9083	0.09485	14.9083	0.0564	14.9087	0.09975	14.9083	0.10925
14.9168	-0.0185	14.9167	0.0962	14.9167	0.05665	14.917	0.1009	14.9167	0.11075
14.9252	-0.0193	14.925	0.0973	14.925	0.0581	14.9253	0.10165	14.925	0.11015
14.9335	-0.0177	14.9333	0.09665	14.9333	0.05795	14.9337	0.0988	14.9333	0.1105
14.9418	-0.0182	14.9417	0.0964	14.9417	0.0589	14.942	0.09915	14.9417	0.1108
14.9502	-0.01765	14.95	0.09745	14.95	0.05785	14.9503	0.1014	14.95	0.11095
14.9585	-0.01845	14.9583	0.09765	14.9583	0.0569	14.9587	0.10145	14.9583	0.1107
14.9668	-0.0176	14.9667	0.09585	14.9667	0.05675	14.967	0.10065	14.9667	0.10995
14.9752	-0.0211	14.975	0.0949	14.975	0.05495	14.9753	0.09985	14.975	0.1096
14.9835	-0.0193	14.9833	0.09485	14.9833	0.0558	14.9837	0.099	14.9833	0.11005
14.9918	-0.01975	14.9917	0.09455	14.9917	0.05645	14.992	0.099	14.9917	0.10905
15.0002	-0.0185	15	0.0954	15	0.05715	15.0003	0.1016	15	0.10995
15.0085	-0.0193	15.0083	0.09435	15.0083	0.05665	15.0087	0.10025	15.0083	0.1106
15.0168	-0.0197	15.0167	0.0941	15.0167	0.05525	15.017	0.0997	15.0167	0.10805
15.0252	-0.0194	15.025	0.09355	15.025	0.05595	15.0253	0.0994	15.025	0.1101
15.0335	-0.0213	15.0333	0.09265	15.0333	0.0563	15.0337	0.09745	15.0333	0.10935
15.0418	-0.01895	15.0417	0.095	15.0417	0.05835	15.042	0.1001	15.0417	0.1116
15.0502	-0.021	15.05	0.0932	15.05	0.05625	15.0503	0.09875	15.05	0.10925
15.0585	-0.0186	15.0583	0.09525	15.0583	0.05755	15.0587	0.09995	15.0583	0.1111
15.0668	-0.02145	15.0667	0.09455	15.0667	0.05655	15.067	0.0992	15.0667	0.10965
15.0752	-0.0204	15.075	0.09575	15.075	0.0587	15.0753	0.1008	15.075	0.11125
15.0835	-0.02025	15.0833	0.0947	15.0833	0.05875	15.0837	0.1011	15.0833	0.11285
15.0918	-0.02	15.0917	0.09585	15.0917	0.05875	15.092	0.1018	15.0917	0.11135
15.1002	-0.02035	15.1	0.09415	15.1	0.05805	15.1003	0.1017	15.1	0.1121
15.1085	-0.0203	15.1083	0.0963	15.1083	0.05855	15.1087	0.10245	15.1083	0.1117
15.1168	-0.0204	15.1167	0.09535	15.1167	0.05845	15.117	0.1031	15.1167	0.11225
15.1252	-0.01835	15.125	0.09785	15.125	0.0615	15.1253	0.10585	15.125	0.1148
15.1335	-0.0194	15.1333	0.0981	15.1333	0.0608	15.1337	0.10385	15.1333	0.11435
15.1418	-0.01815	15.1417	0.09645	15.1417	0.05925	15.142	0.10495	15.1417	0.1143
15.1502	-0.01795	15.15	0.0965	15.15	0.06025	15.1503	0.1069	15.15	0.1147
15.1585	-0.01915	15.1583	0.0976	15.1583	0.0614	15.1587	0.1083	15.1583	0.1161
15.1668	-0.0181	15.1667	0.09735	15.1667	0.0623	15.167	0.10835	15.1667	0.118
15.1752	-0.01915	15.175	0.09645	15.175	0.0632	15.1753	0.10915	15.175	0.11785
15.1835	-0.01835	15.1833	0.098	15.1833	0.06515	15.1837	0.11065	15.1833	0.1218
15.1918	-0.0189	15.1917	0.09925	15.1917	0.06715	15.192	0.1126	15.1917	0.1236
15.2002	-0.0194	15.2	0.0982	15.2	0.0687	15.2003	0.113	15.2	0.12805
15.2085	-0.01995	15.2083	0.1001	15.2083	0.073	15.2087	0.1168	15.2083	0.133
15.2168	-0.0199	15.2167	0.10205	15.2167	0.07445	15.217	0.12015	15.2167	0.13955
15.2252	-0.0201	15.225	0.10475	15.225	0.0766	15.2253	0.12355	15.225	0.1462
15.2335	-0.02125	15.2333	0.1036	15.2333	0.0817	15.2337	0.12795	15.2333	0.15445
15.2418	-0.0209	15.2417	0.1074	15.2417	0.0867	15.242	0.1354	15.2417	0.16615
15.2502	-0.02	15.25	0.11045	15.25	0.0924	15.2503	0.14195	15.25	0.1805
15.2585	-0.0192	15.2583	0.1126	15.2583	0.10015	15.2587	0.1513	15.2583	0.19685
15.2668	-0.02035	15.2667	0.11785	15.2667	0.11095	15.267	0.1626	15.2667	0.21585
15.2752	-0.0196	15.275	0.1223	15.275	0.12215	15.2753	0.17625	15.275	0.23965
15.2835	-0.0165	15.2833	0.1318	15.2833	0.14	15.2837	0.1952	15.2833	0.2685
15.2918	-0.014	15.2917	0.13915	15.2917	0.1571	15.292	0.21585	15.2917	0.3021
15.3002	-0.0147	15.3	0.1474	15.3	0.1773	15.3003	0.23955	15.3	0.33715
15.3085	-0.0127	15.3083	0.159	15.3083	0.20335	15.3087	0.2679	15.3083	0.3793
15.3168	-0.00945	15.3167	0.17325	15.3167	0.2307	15.317	0.299	15.3167	0.42525
15.3252	-0.00795	15.325	0.19275	15.325	0.2653	15.3253	0.338	15.325	0.4764
15.3335	-0.01995	15.3333	0.21225	15.3333	0.30235	15.3337	0.37895	15.3333	0.5312
15.3418	0.0232	15.3417	0.2353	15.3417	0.3447	15.342	0.4245	15.3417	0.5892
15.3502	0.0293	15.35	0.26205	15.35	0.3891	15.3503	0.47485	15.35	0.65145
15.3585	0.0232	15.3583	0.2942	15.3583	0.4426	15.3587	0.52835	15.3583	0.71985
15.3668	0.0186	15.3667	0.33145	15.3667	0.4992	15.367	0.5887	15.3667	0.78925
15.3752	0.0359	15.375	0.37205	15.375	0.5598	15.3753	0.65205	15.375	0.8612
15.3835	0.0524	15.3833	0.41655	15.3833	0.62065	15.3837	0.7138	15.3833	0.93225
15.3918	0.07255	15.3917	0.4653	15.3917	0.6878	15.392	0.78365	15.3917	1.00535
15.4002	0.09045	15.4	0.5181	15.4	0.75455	15.4003	0.85205	15.4	1.07625
15.4085	0.11545	15.4083	0.5755	15.4083	0.82535	15.4087	0.9213	15.4083	1.14685
15.4168	0.14485	15.4167	0.6384	15.4167	0.8977	15.417	0.9939	15.4167	1.21705
15.4252	0.17905	15.425	0.7056	15.425	0.97015	15.4253	1.0682	15.425	1.2849
15.4335	0.21455	15.4333	0.77115	15.4333	1.04045	15.4337	1.1356	15.4333	1.3477
15.4418	0.2587	15.4417	0.84355	15.4417	1.11205	15.442	1.20555	15.4417	1.40655
15.4502	0.3046	15.45	0.91475	15.45	1.17975	15.4503	1.27305	15.45	1.46055
15.4585	0.355	15.4583	0.9863	15.4583	1.2454	15.4587	1.3362	15.4583	1.50825
15.4668	0.40975	15.4667	1.0589	15.4667	1.3083	15.467	1.39695	15.4667	1.5494
15.4752	0.46835	15.475	1.1294	15.475	1.3676	15.4753	1.45445	15.475	1.586
15.4835	0.5304	15.4833	1.1988	15.4833	1.4221	15.4837	1.50755	15.4833	1.61455
15.4918	0.59355	15.4917	1.2652	15.4917	1.47305	15.492	1.55695	15.4917	1.63685
15.5002	0.66035	15.5	1.3299	15.5	1.5209	15.5003	1.60065	15.5	1.6514
15.5085	0.72585	15.5083	1.38995	15.5083	1.56305	15.5087	1.6406	15.5083	1.6588
15.5168	0.7888	15.5167	1.44505	15.5167	1.5966	15.517	1.67255	15.5167	1.65715
15.5252	0.85335	15.525	1.498	15.525	1.62895	15.5253	1.70215	15.525	1.6509
15.5335	0.91455	15.5333	1.5468	15.5333	1.6582	15.5337	1.72675	15.5333	1.6369
15.5418	0.9707	15.5417	1.5871	15.5417	1.677	15.542	1.744	15.5417	1.6137
15.5502	1.02375	15.55	1.6267	15.55	1.69455	15.5503	1.75695	15.55	1.5863
15.5585	1.0694	15.5583	1.65945	15.5583	1.7029	15.5587	1.76415	15.5583	1.5483
15.5668	1.10945	15.5667	1.6869	15.5667	1.70965	15.567	1.765	15.5667	1.50615
15.5752	1.14085	15.575	1.71115	15.575	1.70855	15.5753	1.7596	15.575	1.4586
15.5835	1.16295	15.5833	1.7267	15.5833	1.69985	15.5837	1.74895	15.5833	1.4026
15.5918	1.1813	15.5917	1.7421	15.5917	1.68935	15.592	1.7334	15.5917	1.3486
15.6002	1.1867	15.6	1.7462	15.6	1.6673	15.6003	1.70965	15.6	1.28485
15.6085	1.18565	15.6083	1.74905	15.6083	1.64315	15.6087	1.68295	15.6083	1.22025
15.6168	1.1774	15.6167	1.74615	15.6167	1.6112	15.617	1.6493	15.6167	1.1521
15.6252	1.16025	15.625	1.7368	15.625	1.57265	15.6253	1.60865	15.625	1.08605
15.6335	1.13325	15.6333	1.71905	15.6333	1.5303	15.6337	1.5634	15.6333	1.01715
15.6418	1.09955	15.6417	1.69545	15.6417	1.47965	15.642	1.5131	15.6417	0.9492
15.6502	1.0623	15.65	1.66825	15.65	1.42745	15.6503	1.45695	15.65	0.88195
15.6585	1.01555	15.6583	1.6338	15.6583	1.3665	15.6587	1.39935	15.6583	0.8166
15.6668	0.9643	15.6667	1.5933	15.6667	1.30325	15.667	1.33625	15.6667	0.7524
15.6752	0.9128	15.675	1.548	15.675	1.23975	15.6753	1.272	15.675	0.69595
15.6835	0.8573	15.6833	1.49625	15.6833	1.1723	15.6837	1.20365	15.6833	0.639
15.6918	0.7994	15.6917	1.44125	15.6917	1.1054	15.692	1.13625	15.6917	0.5891
15.7002	0.73955	15.7	1.38225	15.7	1.0355	15.7003	1.0659	15.7	0.5405
15.7085	0.6799	15.7083	1.3189	15.7083	0.9655	15.7087	0.99725	15.7083	0.49525
15.7168	0.62195	15.7167	1.25065	15.7167	0.89625	15.717	0.9281	15.7167	0.45495
15.7252	0.56515	15.725	1.18375	15.725	0.83025	15.7253	0.8614	15.725	0.4206
15.7335	0.51105	15.7333	1.1145	15.7333	0.76495	15.7337	0.7966	15.7333	0.38665
15.7418	0.45945	15.7417	1.0462	15.7417	0.70445	15.742	0.7353	15.7417	0.35705
15.7502	0.41105	15.75	0.97755	15.75	0.6467	15.7503	0.67745	15.75	0.33245
15.7585	0.3657	15.7583	0.9096	15.7583	0.59225	15.7587	0.62355	15.7583	0.31015
15.7668	0.3222	15.7667	0.84195	15.7667	0.5395	15.767	0.5717	15.7667	0.2886
15.7752	0.285	15.775	0.77735	15.775	0.49345	15.7753	0.52425	15.775	0.2724
15.7835	0.24995	15.7833	0.7175	15.7833	0.4494	15.7837	0.48245	15.7833	0.2563
15.7918	0.21915	15.7917	0.6609	15.7917	0.40735	15.792	0.44115	15.7917	0.2423
15.8002	0.18825	15.8	0.60675	15.8	0.37125	15.8003	0.40645	15.8	0.2298
15.8085	0.1667	15.8083	0.55765	15.8083	0.33935	15.8087	0.37425	15.8083	0.22075
15.8168	0.1455	15.8167	0.51155	15.8167	0.31125	15.817	0.3473	15.8167	0.2115
15.8252	0.1281	15.825	0.4701	15.825	0.28515	15.8253	0.3218	15.825	0.20375
15.8335	0.10955	15.8333	0.4311	15.8333	0.2635	15.8337	0.29995	15.8333	0.19785
15.8418	0.0973	15.8417	0.3969	15.8417	0.24255	15.842	0.27955	15.8417	0.1924
15.8502	0.08535	15.85	0.36645	15.85	0.2249	15.8503	0.26265	15.85	0.18635
15.8585	0.0767	15.8583	0.3395	15.8583	0.2105	15.8587	0.2505	15.8583	0.1832
15.8668	0.0681	15.8667	0.3159	15.8667	0.19745	15.867	0.23835	15.8667	0.1794
15.8752	0.05825	15.875	0.293	15.875	0.18465	15.8753	0.22505	15.875	0.1745
15.8835	0.0516	15.8833	0.2744	15.8833	0.1761	15.8837	0.21515	15.8833	0.17125
15.8918	0.0447	15.8917	0.25745	15.8917	0.1648	15.892	0.2069	15.8917	0.1667
15.9002	0.04165	15.9	0.2454	15.9	0.15955	15.9003	0.2011	15.9	0.1662
15.9085	0.03795	15.9083	0.2322	15.9083	0.1507	15.9087	0.19295	15.9083	0.1621
15.9168	0.0347	15.9167	0.22095	15.9167	0.14595	15.917	0.1874	15.9167	0.1623
15.9252	0.03065	15.925	0.2116	15.925	0.14025	15.9253	0.18175	15.925	0.15845
15.9335	0.0263	15.9333	0.2012	15.9333	0.13475	15.9337	0.17615	15.9333	0.15445
15.9418	0.0248	15.9417	0.1945	15.9417	0.1318	15.942	0.17205	15.9417	0.1524
15.9502	0.021	15.95	0.1868	15.95	0.12745	15.9503	0.1678	15.95	0.151
15.9585	0.0191	15.9583	0.1808	15.9583	0.12415	15.9587	0.16455	15.9583	0.14905
15.9668	0.01685	15.9667	0.17695	15.9667	0.12065	15.967	0.16265	15.9667	0.14855
15.9752	0.01515	15.975	0.1739	15.975	0.11955	15.9753	0.15985	15.975	0.1479
15.9835	0.0145	15.9833	0.1697	15.9833	0.1164	15.9837	0.15825	15.9833	0.14745
15.9918	0.01225	15.9917	0.16655	15.9917	0.11355	15.992	0.15435	15.9917	0.14565
16.0002	0.01195	16	0.1644	16	0.1133	16.0003	0.1542	16	0.1456
16.0085	0.0105	16.0083	0.16135	16.0083	0.11275	16.0087	0.15115	16.0083	0.1451
16.0168	0.00775	16.0167	0.15755	16.0167	0.1063	16.017	0.1499	16.0167	0.14285
16.0252	0.0074	16.025	0.15645	16.025	0.10565	16.0253	0.14715	16.025	0.14355
16.0335	0.00775	16.0333	0.1538	16.0333	0.1044	16.0337	0.146	16.0333	0.1438
16.0418	0.00695	16.0417	0.1527	16.0417	0.10405	16.042	0.14545	16.0417	0.1427
16.0502	0.00745	16.05	0.1513	16.05	0.1027	16.0503	0.1462	16.05	0.1416
16.0585	0.0064	16.0583	0.1487	16.0583	0.10055	16.0587	0.14185	16.0583	0.13915
16.0668	0.00725	16.0667	0.14715	16.0667	0.10195	16.067	0.1434	16.0667	0.1412
16.0752	0.0067	16.075	0.1455	16.075	0.10075	16.0753	0.1418	16.075	0.13975
16.0835	0.00695	16.0833	0.143	16.0833	0.0977	16.0837	0.1409	16.0833	0.13985
16.0918	0.0066	16.0917	0.14265	16.0917	0.09795	16.092	0.14075	16.0917	0.13865
16.1002	0.0074	16.1	0.1413	16.1	0.0972	16.1003	0.14005	16.1	0.13765
16.1085	0.00665	16.1083	0.1407	16.1083	0.0975	16.1087	0.13765	16.1083	0.1387
16.1168	0.00725	16.1167	0.13965	16.1167	0.09755	16.117	0.13955	16.1167	0.13875
16.1252	0.00885	16.125	0.1382	16.125	0.0973	16.1253	0.1377	16.125	0.1368
16.1335	0.0087	16.1333	0.1374	16.1333	0.0957	16.1337	0.13725	16.1333	0.13775
16.1418	0.0072	16.1417	0.1367	16.1417	0.0962	16.142	0.13735	16.1417	0.1365
16.1502	0.0077	16.15	0.13555	16.15	0.09575	16.1503	0.13605	16.15	0.1372
16.1585	0.00505	16.1583	0.13475	16.1583	0.0948	16.1587	0.1346	16.1583	0.1358
16.1668	0.00415	16.1667	0.1338	16.1667	0.09325	16.167	0.1329	16.1667	0.13495
16.1752	0.0055	16.175	0.1332	16.175	0.0949	16.1753	0.1351	16.175	0.13585
16.1835	0.0067	16.1833	0.13205	16.1833	0.09535	16.1837	0.13485	16.1833	0.13515
16.1918	0.008	16.1917	0.13315	16.1917	0.09495	16.192	0.13475	16.1917	0.13725
16.2002	0.0064	16.2	0.13225	16.2	0.0931	16.2003	0.13355	16.2	0.1352
16.2085	0.0065	16.2083	0.13275	16.2083	0.09385	16.2087	0.13315	16.2083	0.1365
16.2168	0.00955	16.2167	0.1327	16.2167	0.09375	16.217	0.1338	16.2167	0.1371
16.2252	0.0071	16.225	0.1312	16.225	0.0911	16.2253	0.13285	16.225	0.1368
16.2335	0.0093	16.2333	0.13235	16.2333	0.09235	16.2337	0.1353	16.2333	0.1368
16.2418	0.01075	16.2417	0.1334	16.2417	0.0929	16.242	0.13545	16.2417	0.13905
16.2502	0.01065	16.25	0.1306	16.25	0.09175	16.2503	0.1339	16.25	0.13605
16.2585	0.01115	16.2583	0.1298	16.2583	0.0932	16.2587	0.13485	16.2583	0.1367
16.2668	0.00885	16.2667	0.12835	16.2667	0.0896	16.267	0.1332	16.2667	0.13335
16.2752	0.0121	16.275	0.1302	16.275	0.09425	16.2753	0.13465	16.275	0.13535
16.2835	0.0123	16.2833	0.12775	16.2833	0.09205	16.2837	0.1347	16.2833	0.13455
16.2918	0.0119	16.2917	0.12755	16.2917	0.09325	16.292	0.1346	16.2917	0.1356
16.3002	0.01105	16.3	0.1266	16.3	0.09155	16.3003	0.1338	16.3	0.1344
16.3085	0.0141	16.3083	0.12735	16.3083	0.09485	16.3087	0.13475	16.3083	0.1357
16.3168	0.0128	16.3167	0.12685	16.3167	0.0951	16.317	0.135	16.3167	0.1367
16.3252	0.0122	16.325	0.127	16.325	0.0953	16.3253	0.13605	16.325	0.1373
16.3335	0.0105	16.3333	0.12585	16.3333	0.09365	16.3337	0.1326	16.3333	0.1358
16.3418	0.0116	16.3417	0.1258	16.3417	0.09725	16.342	0.1354	16.3417	0.13775
16.3502	0.0103	16.35	0.12535	16.35	0.0959	16.3503	0.1326	16.35	0.13875
16.3585	0.0077	16.3583	0.1253	16.3583	0.09445	16.3587	0.13305	16.3583	0.13805
16.3668	0.00865	16.3667	0.12545	16.3667	0.0958	16.367	0.13265	16.3667	0.1386
16.3752	0.00895	16.375	0.1236	16.375	0.09425	16.3753	0.13255	16.375	0.1386
16.3835	0.00815	16.3833	0.12395	16.3833	0.09375	16.3837	0.1333	16.3833	0.13945
16.3918	0.00795	16.3917	0.12395	16.3917	0.0936	16.392	0.1323	16.3917	0.14065
16.4002	0.0078	16.4	0.1251	16.4	0.09405	16.4003	0.13235	16.4	0.1395
16.4085	0.0076	16.4083	0.12265	16.4083	0.09305	16.4087	0.1316	16.4083	0.14145
16.4168	0.00865	16.4167	0.1242	16.4167	0.09385	16.417	0.13265	16.4167	0.142
16.4252	0.00855	16.425	0.1236	16.425	0.093	16.4253	0.13385	16.425	0.14275
16.4335	0.009	16.4333	0.1244	16.4333	0.0946	16.4337	0.13295	16.4333	0.144
16.4418	0.01065	16.4417	0.1233	16.4417	0.09455	16.442	0.13495	16.4417	0.14465
16.4502	0.00925	16.45	0.1245	16.45	0.09425	16.4503	0.1355	16.45	0.1457
16.4585	0.0077	16.4583	0.12275	16.4583	0.09245	16.4587	0.13405	16.4583	0.14555
16.4668	0.00735	16.4667	0.1231	16.4667	0.09415	16.467	0.13475	16.4667	0.1469
16.4752	0.0072	16.475	0.12365	16.475	0.0954	16.4753	0.13625	16.475	0.14815
16.4835	0.00805	16.4833	0.12395	16.4833	0.094	16.4837	0.1363	16.4833	0.1496
16.4918	0.0073	16.4917	0.1228	16.4917	0.09445	16.492	0.13525	16.4917	0.14815
16.5002	0.00775	16.5	0.12205	16.5	0.0962	16.5003	0.13725	16.5	0.1495
16.5085	0.0073	16.5083	0.121	16.5083	0.0978	16.5087	0.13545	16.5083	0.1501
16.5168	0.00675	16.5167	0.12235	16.5167	0.09725	16.517	0.13695	16.5167	0.1498
16.5252	0.0067	16.525	0.12125	16.525	0.0982	16.5253	0.13685	16.525	0.1521
16.5335	0.0049	16.5333	0.1212	16.5333	0.0989	16.5337	0.13725	16.5333	0.15305
16.5418	0.00375	16.5417	0.12305	16.5417	0.09835	16.542	0.1361	16.5417	0.15135
16.5502	0.00495	16.55	0.12185	16.55	0.0986	16.5503	0.13735	16.55	0.1511
16.5585	0.00425	16.5583	0.1239	16.5583	0.09965	16.5587	0.13785	16.5583	0.15125
16.5668	0.0044	16.5667	0.12475	16.5667	0.10225	16.567	0.14045	16.5667	0.15365
16.5752	0.0038	16.575	0.12605	16.575	0.10155	16.5753	0.1388	16.575	0.1522
16.5835	0.0046	16.5833	0.12515	16.5833	0.10365	16.5837	0.1406	16.5833	0.1529
16.5918	0.00555	16.5917	0.128	16.5917	0.10345	16.592	0.1416	16.5917	0.15285
16.6002	0.005	16.6	0.12795	16.6	0.10355	16.6003	0.142	16.6	0.1507
16.6085	0.0077	16.6083	0.13185	16.6083	0.1042	16.6087	0.14505	16.6083	0.1517
16.6168	0.00795	16.6167	0.12955	16.6167	0.1038	16.617	0.1418	16.6167	0.1493
16.6252	0.008	16.625	0.1297	16.625	0.10435	16.6253	0.1424	16.625	0.1475
16.6335	0.00875	16.6333	0.1308	16.6333	0.1065	16.6337	0.14295	16.6333	0.1469
[truncated: 4,604 more rows]
