# Supplementary material for: A moonlighting function of a chitin polysaccharide monooxygenase, CWR-1, in Neurospora crassa allorecognition
Source: eLife. 2022 Aug 30;11:e80459. doi: 10.7554/eLife.80459 (PMC9550227; doi:10.7554/eLife.80459)
Supplement: Figure 1—figure supplement 5—source data 2. — Blank subtracted HPAEC-PAD traces. The samples were prepared as described in ‘Materials and methods'. The time and nC response are listed in the table. [file elife-80459-fig1-figsupp5-data2.xlsx]

## Sheet: Sheet1
Figure 1-figure supplement 5B (Oxidized standards)
chitotriose C1ox		chitotetraose C1ox		chitopentaose C1ox		chitohexaose C1ox		Mixed C1ox
time	nC	time	nC	time	nC	time	nC	time	nC
0.000167	0.15065	0.000333	0.0161	0.000333	0.12585	0.000167	0.0106	0	0.14045
0.0085	0.1209	0.008667	-0.01655	0.008667	0.1014	0.0085	-0.0173	0.008333	0.1101
0.016833	0.1092	0.017	-0.0264	0.017	0.0874	0.016833	-0.0292	0.016667	0.0967
0.025167	0.11455	0.025333	-0.02065	0.025333	0.0913	0.025167	-0.0249	0.025	0.1025
0.0335	0.11755	0.033667	-0.0183	0.033667	0.09575	0.0335	-0.02155	0.033333	0.10465
0.041833	0.11795	0.042	-0.0167	0.042	0.09595	0.041833	-0.01975	0.041667	0.1073
0.050167	0.11755	0.050333	-0.0159	0.050333	0.09685	0.050167	-0.0199	0.05	0.10485
0.0585	0.11605	0.058667	-0.01775	0.058667	0.0942	0.0585	-0.02065	0.058333	0.1045
0.066833	0.11425	0.067	-0.01765	0.067	0.09365	0.066833	-0.0203	0.066667	0.10405
0.075167	0.11485	0.075333	-0.0177	0.075333	0.09455	0.075167	-0.0198	0.075	0.10375
0.0835	0.1148	0.083667	-0.0184	0.083667	0.09405	0.0835	-0.02115	0.083333	0.10285
0.091833	0.1151	0.092	-0.01845	0.092	0.09355	0.091833	-0.02075	0.091667	0.10315
0.100167	0.115	0.100333	-0.01905	0.100333	0.0944	0.100167	-0.02045	0.1	0.1025
0.1085	0.1151	0.108667	-0.01705	0.108667	0.0968	0.1085	-0.02065	0.108333	0.10235
0.116833	0.11415	0.117	-0.017	0.117	0.0948	0.116833	-0.0207	0.116667	0.1029
0.125167	0.11515	0.125333	-0.01775	0.125333	0.09575	0.125167	-0.01985	0.125	0.1033
0.1335	0.1174	0.133667	-0.01765	0.133667	0.09465	0.1335	-0.0196	0.133333	0.10375
0.141833	0.1172	0.142	-0.01775	0.142	0.0936	0.141833	-0.02105	0.141667	0.1028
0.150167	0.11855	0.150333	-0.0168	0.150333	0.0952	0.150167	-0.0193	0.15	0.10405
0.1585	0.11585	0.158667	-0.0176	0.158667	0.09515	0.1585	-0.021	0.158333	0.10155
0.166833	0.11605	0.167	-0.01835	0.167	0.0943	0.166833	-0.0196	0.166667	0.1032
0.175167	0.11785	0.175333	-0.01615	0.175333	0.09555	0.175167	-0.01825	0.175	0.10355
0.1835	0.1179	0.183667	-0.01525	0.183667	0.09755	0.1835	-0.01825	0.183333	0.10535
0.191833	0.1177	0.192	-0.0163	0.192	0.0976	0.191833	-0.0175	0.191667	0.1036
0.200167	0.1174	0.200333	-0.01795	0.200333	0.09545	0.200167	-0.01825	0.2	0.10465
0.2085	0.11735	0.208667	-0.0162	0.208667	0.0953	0.2085	-0.01905	0.208333	0.1038
0.216833	0.11735	0.217	-0.0159	0.217	0.09625	0.216833	-0.019	0.216667	0.10405
0.225167	0.11765	0.225333	-0.01765	0.225333	0.09645	0.225167	-0.02005	0.225	0.10405
0.2335	0.118	0.233667	-0.0177	0.233667	0.09665	0.2335	-0.02	0.233333	0.10375
0.241833	0.1182	0.242	-0.0158	0.242	0.09845	0.241833	-0.0175	0.241667	0.10615
0.250167	0.11705	0.250333	-0.0152	0.250333	0.09705	0.250167	-0.0187	0.25	0.1042
0.2585	0.1158	0.258667	-0.01615	0.258667	0.0962	0.2585	-0.0195	0.258333	0.10265
0.266833	0.1171	0.267	-0.0163	0.267	0.09625	0.266833	-0.0199	0.266667	0.10315
0.275167	0.11955	0.275333	-0.0141	0.275333	0.0981	0.275167	-0.01825	0.275	0.1052
0.2835	0.1191	0.283667	-0.01575	0.283667	0.0969	0.2835	-0.01905	0.283333	0.10435
0.291833	0.11925	0.292	-0.0152	0.292	0.0969	0.291833	-0.018	0.291667	0.10565
0.300167	0.117	0.300333	-0.0158	0.300333	0.09595	0.300167	-0.01875	0.3	0.1041
0.3085	0.11905	0.308667	-0.01575	0.308667	0.0978	0.3085	-0.0173	0.308333	0.10595
0.316833	0.11815	0.317	-0.01575	0.317	0.0983	0.316833	-0.01825	0.316667	0.1048
0.325167	0.11795	0.325333	-0.01485	0.325333	0.0972	0.325167	-0.01575	0.325	0.10545
0.3335	0.11855	0.333667	-0.0144	0.333667	0.09785	0.3335	-0.01675	0.333333	0.1063
0.341833	0.11815	0.342	-0.01515	0.342	0.09785	0.341833	-0.0173	0.341667	0.1043
0.350167	0.11605	0.350333	-0.01705	0.350333	0.0974	0.350167	-0.0196	0.35	0.10245
0.3585	0.11885	0.358667	-0.0137	0.358667	0.09805	0.3585	-0.0156	0.358333	0.1061
0.366833	0.11845	0.367	-0.01395	0.367	0.0995	0.366833	-0.0166	0.366667	0.107
0.375167	0.11895	0.375333	-0.0139	0.375333	0.0988	0.375167	-0.0161	0.375	0.106
0.3835	0.11925	0.383667	-0.0151	0.383667	0.0992	0.3835	-0.01695	0.383333	0.1046
0.391833	0.1193	0.392	-0.0137	0.392	0.0997	0.391833	-0.0171	0.391667	0.1048
0.400167	0.1184	0.400333	-0.01485	0.400333	0.09825	0.400167	-0.0189	0.4	0.10385
0.4085	0.1178	0.408667	-0.01475	0.408667	0.0993	0.4085	-0.01965	0.408333	0.1049
0.416833	0.11795	0.417	-0.0152	0.417	0.0967	0.416833	-0.02015	0.416667	0.1037
0.425167	0.1195	0.425333	-0.01345	0.425333	0.0976	0.425167	-0.0187	0.425	0.10475
0.4335	0.11835	0.433667	-0.01405	0.433667	0.09865	0.4335	-0.0182	0.433333	0.10535
0.441833	0.1177	0.442	-0.01425	0.442	0.0985	0.441833	-0.0199	0.441667	0.10555
0.450167	0.11655	0.450333	-0.0155	0.450333	0.0984	0.450167	-0.02045	0.45	0.1038
0.4585	0.1181	0.458667	-0.01355	0.458667	0.09955	0.4585	-0.01845	0.458333	0.10485
0.466833	0.1187	0.467	-0.01365	0.467	0.0997	0.466833	-0.01745	0.466667	0.1064
0.475167	0.11805	0.475333	-0.0121	0.475333	0.101	0.475167	-0.0171	0.475	0.10485
0.4835	0.11885	0.483667	-0.01335	0.483667	0.1003	0.4835	-0.0173	0.483333	0.1062
0.491833	0.1191	0.492	-0.01305	0.492	0.1014	0.491833	-0.0162	0.491667	0.107
0.500167	0.11925	0.500333	-0.01185	0.500333	0.1023	0.500167	-0.0156	0.5	0.10805
0.5085	0.1203	0.508667	-0.0121	0.508667	0.1029	0.5085	-0.0159	0.508333	0.10785
0.516833	0.1201	0.517	-0.012	0.517	0.10245	0.516833	-0.0156	0.516667	0.10745
0.525167	0.1203	0.525333	-0.01255	0.525333	0.1011	0.525167	-0.016	0.525	0.10735
0.5335	0.12145	0.533667	-0.01205	0.533667	0.10115	0.5335	-0.01585	0.533333	0.10785
0.541833	0.1168	0.542	-0.01365	0.542	0.10065	0.541833	-0.0174	0.541667	0.1065
0.550167	0.11735	0.550333	-0.01425	0.550333	0.1004	0.550167	-0.0184	0.55	0.10795
0.5585	0.11875	0.558667	-0.0123	0.558667	0.1008	0.5585	-0.017	0.558333	0.1076
0.566833	0.1183	0.567	-0.0133	0.567	0.1018	0.566833	-0.0178	0.566667	0.1068
0.575167	0.1179	0.575333	-0.01285	0.575333	0.1019	0.575167	-0.01695	0.575	0.10675
0.5835	0.11815	0.583667	-0.01255	0.583667	0.1013	0.5835	-0.01865	0.583333	0.1076
0.591833	0.1176	0.592	-0.0146	0.592	0.1005	0.591833	-0.02	0.591667	0.10715
0.600167	0.11835	0.600333	-0.0138	0.600333	0.1008	0.600167	-0.01815	0.6	0.10745
0.6085	0.1187	0.608667	-0.0127	0.608667	0.10155	0.6085	-0.0177	0.608333	0.10825
0.616833	0.11835	0.617	-0.01275	0.617	0.10135	0.616833	-0.01855	0.616667	0.10735
0.625167	0.11745	0.625333	-0.0139	0.625333	0.10055	0.625167	-0.01775	0.625	0.1034
0.6335	0.1186	0.633667	-0.0131	0.633667	0.1023	0.6335	-0.01805	0.633333	0.105
0.641833	0.1181	0.642	-0.0122	0.642	0.1024	0.641833	-0.01785	0.641667	0.10595
0.650167	0.11925	0.650333	-0.01205	0.650333	0.1024	0.650167	-0.01785	0.65	0.10575
0.6585	0.11985	0.658667	-0.0121	0.658667	0.10215	0.6585	-0.01785	0.658333	0.1063
0.666833	0.1177	0.667	-0.0125	0.667	0.10215	0.666833	-0.0186	0.666667	0.1062
0.675167	0.1177	0.675333	-0.013	0.675333	0.1005	0.675167	-0.0178	0.675	0.10585
0.6835	0.11735	0.683667	-0.0125	0.683667	0.1007	0.6835	-0.0173	0.683333	0.1046
0.691833	0.11895	0.692	-0.0126	0.692	0.10205	0.691833	-0.01685	0.691667	0.10635
0.700167	0.11775	0.700333	-0.0138	0.700333	0.10075	0.700167	-0.0179	0.7	0.1054
0.7085	0.1206	0.708667	-0.01215	0.708667	0.1023	0.7085	-0.0153	0.708333	0.1091
0.716833	0.1194	0.717	-0.0129	0.717	0.1006	0.716833	-0.0167	0.716667	0.1066
0.725167	0.11745	0.725333	-0.01415	0.725333	0.1004	0.725167	-0.0175	0.725	0.1068
0.7335	0.1189	0.733667	-0.01305	0.733667	0.1023	0.7335	-0.01635	0.733333	0.10775
0.741833	0.11875	0.742	-0.0123	0.742	0.10285	0.741833	-0.0159	0.741667	0.10875
0.750167	0.119	0.750333	-0.0131	0.750333	0.10255	0.750167	-0.01595	0.75	0.108
0.7585	0.11985	0.758667	-0.01355	0.758667	0.10285	0.7585	-0.0147	0.758333	0.1086
0.766833	0.1189	0.767	-0.0115	0.767	0.10175	0.766833	-0.0166	0.766667	0.1092
0.775167	0.1181	0.775333	-0.01405	0.775333	0.10205	0.775167	-0.01735	0.775	0.1087
0.7835	0.1187	0.783667	-0.01535	0.783667	0.10145	0.7835	-0.01775	0.783333	0.10955
0.791833	0.1168	0.792	-0.0159	0.792	0.10015	0.791833	-0.01915	0.791667	0.1081
0.800167	0.11805	0.800333	-0.01515	0.800333	0.0999	0.800167	-0.0177	0.8	0.1085
0.8085	0.11815	0.808667	-0.0155	0.808667	0.1006	0.8085	-0.0196	0.808333	0.10715
0.816833	0.11855	0.817	-0.01515	0.817	0.1005	0.816833	-0.01735	0.816667	0.10755
0.825167	0.11905	0.825333	-0.01385	0.825333	0.101	0.825167	-0.01935	0.825	0.1081
0.8335	0.11855	0.833667	-0.01345	0.833667	0.10105	0.8335	-0.01975	0.833333	0.10845
0.841833	0.1186	0.842	-0.01405	0.842	0.09985	0.841833	-0.01855	0.841667	0.10805
0.850167	0.11995	0.850333	-0.01315	0.850333	0.101	0.850167	-0.0184	0.85	0.10785
0.8585	0.11865	0.858667	-0.0137	0.858667	0.10195	0.8585	-0.0175	0.858333	0.10865
0.866833	0.1193	0.867	-0.01305	0.867	0.1013	0.866833	-0.01675	0.866667	0.1087
0.875167	0.1199	0.875333	-0.01275	0.875333	0.1011	0.875167	-0.0166	0.875	0.10835
0.8835	0.119	0.883667	-0.01575	0.883667	0.10005	0.8835	-0.0185	0.883333	0.1061
0.891833	0.1206	0.892	-0.0147	0.892	0.10025	0.891833	-0.01745	0.891667	0.1078
0.900167	0.12105	0.900333	-0.01465	0.900333	0.1016	0.900167	-0.01655	0.9	0.10805
0.9085	0.11955	0.908667	-0.0174	0.908667	0.1003	0.9085	-0.01775	0.908333	0.1066
0.916833	0.12065	0.917	-0.01535	0.917	0.1028	0.916833	-0.01785	0.916667	0.108
0.925167	0.12055	0.925333	-0.0152	0.925333	0.1023	0.925167	-0.01745	0.925	0.1078
0.9335	0.11955	0.933667	-0.01455	0.933667	0.1026	0.9335	-0.0171	0.933333	0.1081
0.941833	0.1204	0.942	-0.0152	0.942	0.10405	0.941833	-0.01725	0.941667	0.1076
0.950167	0.1187	0.950333	-0.01535	0.950333	0.1021	0.950167	-0.0181	0.95	0.107
0.9585	0.11945	0.958667	-0.0135	0.958667	0.10205	0.9585	-0.01805	0.958333	0.1081
0.966833	0.11915	0.967	-0.01565	0.967	0.1024	0.966833	-0.01875	0.966667	0.1078
0.975167	0.11775	0.975333	-0.0168	0.975333	0.10225	0.975167	-0.01905	0.975	0.10665
0.9835	0.11755	0.983667	-0.0167	0.983667	0.1019	0.9835	-0.02005	0.983333	0.107
0.991833	0.1181	0.992	-0.01655	0.992	0.10165	0.991833	-0.0207	0.991667	0.10625
1.00017	0.11705	1.00033	-0.01755	1.00033	0.1003	1.00017	-0.01885	1	0.10515
1.0085	0.11925	1.00867	-0.0149	1.00867	0.10045	1.0085	-0.01955	1.00833	0.10585
1.01683	0.1204	1.017	-0.01395	1.017	0.10185	1.01683	-0.01905	1.01667	0.10625
1.02517	0.1201	1.02533	-0.01495	1.02533	0.1018	1.02517	-0.01975	1.025	0.10605
1.0335	0.12	1.03367	-0.0153	1.03367	0.1021	1.0335	-0.01845	1.03333	0.1082
1.04183	0.11935	1.042	-0.0153	1.042	0.10275	1.04183	-0.01885	1.04167	0.10685
1.05017	0.11915	1.05033	-0.01635	1.05033	0.10115	1.05017	-0.01895	1.05	0.10805
1.0585	0.11995	1.05867	-0.0163	1.05867	0.102	1.0585	-0.01845	1.05833	0.10725
1.06683	0.1194	1.067	-0.0171	1.067	0.10255	1.06683	-0.01855	1.06667	0.1074
1.07517	0.1199	1.07533	-0.01575	1.07533	0.10135	1.07517	-0.0168	1.075	0.10735
1.0835	0.12145	1.08367	-0.01615	1.08367	0.10105	1.0835	-0.01695	1.08333	0.10745
1.09183	0.12295	1.092	-0.0157	1.092	0.10205	1.09183	-0.0172	1.09167	0.10795
1.10017	0.1192	1.10033	-0.0193	1.10033	0.1	1.10017	-0.01815	1.1	0.1058
1.1085	0.12095	1.10867	-0.0167	1.10867	0.1024	1.1085	-0.0185	1.10833	0.10725
1.11683	0.121	1.117	-0.016	1.117	0.10275	1.11683	-0.01805	1.11667	0.10965
1.12517	0.11915	1.12533	-0.0172	1.12533	0.1037	1.12517	-0.01725	1.125	0.10725
1.1335	0.11945	1.13367	-0.0167	1.13367	0.1005	1.1335	-0.0189	1.13333	0.1066
1.14183	0.1183	1.142	-0.0178	1.142	0.1008	1.14183	-0.0191	1.14167	0.10655
1.15017	0.11905	1.15033	-0.01685	1.15033	0.1022	1.15017	-0.019	1.15	0.1084
1.1585	0.119	1.15867	-0.0175	1.15867	0.10095	1.1585	-0.02055	1.15833	0.1075
1.16683	0.11925	1.167	-0.0177	1.167	0.0996	1.16683	-0.01995	1.16667	0.10855
1.17517	0.11965	1.17533	-0.01625	1.17533	0.1008	1.17517	-0.0201	1.175	0.1086
1.1835	0.1204	1.18367	-0.017	1.18367	0.10115	1.1835	-0.02015	1.18333	0.1071
1.19183	0.12065	1.192	-0.0174	1.192	0.1014	1.19183	-0.01995	1.19167	0.10755
1.20017	0.12015	1.20033	-0.0165	1.20033	0.09975	1.20017	-0.0191	1.2	0.10675
1.2085	0.12145	1.20867	-0.01605	1.20867	0.10105	1.2085	-0.0188	1.20833	0.10605
1.21683	0.12155	1.217	-0.0156	1.217	0.10145	1.21683	-0.0186	1.21667	0.10775
1.22517	0.1228	1.22533	-0.01415	1.22533	0.1032	1.22517	-0.01795	1.225	0.10895
1.2335	0.1201	1.23367	-0.01545	1.23367	0.10165	1.2335	-0.01995	1.23333	0.1065
1.24183	0.1223	1.242	-0.0154	1.242	0.10315	1.24183	-0.0164	1.24167	0.10835
1.25017	0.1219	1.25033	-0.0157	1.25033	0.10235	1.25017	-0.01805	1.25	0.1074
1.2585	0.12215	1.25867	-0.0149	1.25867	0.10345	1.2585	-0.0177	1.25833	0.1095
1.26683	0.1237	1.267	-0.0148	1.267	0.1037	1.26683	-0.0167	1.26667	0.10945
1.27517	0.1238	1.27533	-0.01565	1.27533	0.10135	1.27517	-0.01775	1.275	0.10895
1.2835	0.12295	1.28367	-0.0154	1.28367	0.1029	1.2835	-0.0177	1.28333	0.10895
1.29183	0.1218	1.292	-0.0165	1.292	0.10085	1.29183	-0.0179	1.29167	0.109
1.30017	0.1222	1.30033	-0.0153	1.30033	0.10125	1.30017	-0.0166	1.3	0.10995
1.3085	0.12295	1.30867	-0.0148	1.30867	0.1031	1.3085	-0.0166	1.30833	0.11065
1.31683	0.12355	1.317	-0.01615	1.317	0.1024	1.31683	-0.0178	1.31667	0.10885
1.32517	0.12465	1.32533	-0.0149	1.32533	0.1027	1.32517	-0.0174	1.325	0.1108
1.3335	0.12365	1.33367	-0.0161	1.33367	0.10245	1.3335	-0.01895	1.33333	0.10995
1.34183	0.1233	1.342	-0.01555	1.342	0.1031	1.34183	-0.0185	1.34167	0.11085
1.35017	0.1242	1.35033	-0.0152	1.35033	0.1027	1.35017	-0.0188	1.35	0.11005
1.3585	0.1244	1.35867	-0.01635	1.35867	0.10335	1.3585	-0.01815	1.35833	0.1101
1.36683	0.124	1.367	-0.0151	1.367	0.1045	1.36683	-0.01865	1.36667	0.11115
1.37517	0.12325	1.37533	-0.0149	1.37533	0.10355	1.37517	-0.01785	1.375	0.1103
1.3835	0.12465	1.38367	-0.0143	1.38367	0.10415	1.3835	-0.0178	1.38333	0.1111
1.39183	0.1243	1.392	-0.01345	1.392	0.10435	1.39183	-0.0183	1.39167	0.11115
1.40017	0.12615	1.40033	-0.0128	1.40033	0.1059	1.40017	-0.01635	1.4	0.11295
1.4085	0.1262	1.40867	-0.01375	1.40867	0.10535	1.4085	-0.0166	1.40833	0.1121
1.41683	0.1213	1.417	-0.01495	1.417	0.1026	1.41683	-0.0185	1.41667	0.11
1.42517	0.1231	1.42533	-0.01385	1.42533	0.10465	1.42517	-0.01665	1.425	0.11065
1.4335	0.1233	1.43367	-0.01505	1.43367	0.10425	1.4335	-0.01735	1.43333	0.1102
1.44183	0.12535	1.442	-0.0135	1.442	0.10645	1.44183	-0.01625	1.44167	0.1123
1.45017	0.12535	1.45033	-0.0148	1.45033	0.1051	1.45017	-0.016	1.45	0.11285
1.4585	0.12395	1.45867	-0.0143	1.45867	0.1029	1.4585	-0.01705	1.45833	0.1107
1.46683	0.1245	1.467	-0.01465	1.467	0.10465	1.46683	-0.0164	1.46667	0.11295
1.47517	0.1218	1.47533	-0.01615	1.47533	0.10315	1.47517	-0.01855	1.475	0.111
1.4835	0.12525	1.48367	-0.01515	1.48367	0.10415	1.4835	-0.01815	1.48333	0.11065
1.49183	0.1251	1.492	-0.01405	1.492	0.10605	1.49183	-0.01665	1.49167	0.1133
1.50017	0.1259	1.50033	-0.01435	1.50033	0.1069	1.50017	-0.0162	1.5	0.1109
1.5085	0.12475	1.50867	-0.0149	1.50867	0.1065	1.5085	-0.01775	1.50833	0.11225
1.51683	0.12425	1.517	-0.01465	1.517	0.1057	1.51683	-0.0171	1.51667	0.11195
1.52517	0.123	1.52533	-0.0149	1.52533	0.1046	1.52517	-0.0192	1.525	0.1108
1.5335	0.12325	1.53367	-0.0159	1.53367	0.1061	1.5335	-0.01795	1.53333	0.11045
1.54183	0.12425	1.542	-0.0165	1.542	0.10645	1.54183	-0.01775	1.54167	0.1119
1.55017	0.12465	1.55033	-0.0156	1.55033	0.107	1.55017	-0.01805	1.55	0.1119
1.5585	0.12315	1.55867	-0.0165	1.55867	0.1055	1.5585	-0.0178	1.55833	0.11125
1.56683	0.12395	1.567	-0.01505	1.567	0.1068	1.56683	-0.01735	1.56667	0.11105
1.57517	0.1231	1.57533	-0.01515	1.57533	0.10525	1.57517	-0.01865	1.575	0.11165
1.5835	0.12355	1.58367	-0.0136	1.58367	0.1044	1.5835	-0.0192	1.58333	0.11015
1.59183	0.1243	1.592	-0.015	1.592	0.10515	1.59183	-0.0184	1.59167	0.1114
1.60017	0.1226	1.60033	-0.015	1.60033	0.1037	1.60017	-0.0195	1.6	0.11075
1.6085	0.12345	1.60867	-0.01495	1.60867	0.10545	1.6085	-0.0174	1.60833	0.1123
1.61683	0.12335	1.617	-0.01525	1.617	0.1048	1.61683	-0.0171	1.61667	0.1119
1.62517	0.124	1.62533	-0.0137	1.62533	0.1064	1.62517	-0.0172	1.625	0.1126
1.6335	0.12395	1.63367	-0.0129	1.63367	0.10775	1.6335	-0.01785	1.63333	0.11245
1.64183	0.1255	1.642	-0.01295	1.642	0.10675	1.64183	-0.0157	1.64167	0.1132
1.65017	0.12655	1.65033	-0.0132	1.65033	0.1069	1.65017	-0.0166	1.65	0.11285
1.6585	0.12475	1.65867	-0.01385	1.65867	0.10585	1.6585	-0.01715	1.65833	0.11245
1.66683	0.12305	1.667	-0.01425	1.667	0.10515	1.66683	-0.01775	1.66667	0.1111
1.67517	0.1244	1.67533	-0.015	1.67533	0.1059	1.67517	-0.01855	1.675	0.113
1.6835	0.12575	1.68367	-0.01265	1.68367	0.1086	1.6835	-0.016	1.68333	0.11555
1.69183	0.12425	1.692	-0.01495	1.692	0.10515	1.69183	-0.0185	1.69167	0.1117
1.70017	0.12515	1.70033	-0.01445	1.70033	0.1071	1.70017	-0.01775	1.7	0.1138
1.7085	0.1247	1.70867	-0.0132	1.70867	0.10815	1.7085	-0.01605	1.70833	0.11395
1.71683	0.12365	1.717	-0.0147	1.717	0.10675	1.71683	-0.01885	1.71667	0.1118
1.72517	0.12305	1.72533	-0.0174	1.72533	0.1049	1.72517	-0.02085	1.725	0.1107
1.7335	0.12335	1.73367	-0.0152	1.73367	0.10605	1.7335	-0.01995	1.73333	0.11255
1.74183	0.12285	1.742	-0.0162	1.742	0.1061	1.74183	-0.0188	1.74167	0.11255
1.75017	0.12225	1.75033	-0.0177	1.75033	0.1047	1.75017	-0.02025	1.75	0.11075
1.7585	0.12195	1.75867	-0.0166	1.75867	0.10495	1.7585	-0.02145	1.75833	0.1108
1.76683	0.12525	1.767	-0.0154	1.767	0.104	1.76683	-0.01985	1.76667	0.1132
1.77517	0.125	1.77533	-0.0158	1.77533	0.10545	1.77517	-0.0189	1.775	0.11085
1.7835	0.12335	1.78367	-0.018	1.78367	0.1039	1.7835	-0.0201	1.78333	0.10955
1.79183	0.12435	1.792	-0.0147	1.792	0.10545	1.79183	-0.01885	1.79167	0.10985
1.80017	0.12495	1.80033	-0.01455	1.80033	0.1052	1.80017	-0.0184	1.8	0.11135
1.8085	0.1244	1.80867	-0.0153	1.80867	0.1047	1.8085	-0.0173	1.80833	0.11145
1.81683	0.12595	1.817	-0.0142	1.817	0.10845	1.81683	-0.01785	1.81667	0.1128
1.82517	0.1245	1.82533	-0.01455	1.82533	0.1057	1.82517	-0.0173	1.825	0.11145
1.8335	0.12635	1.83367	-0.01315	1.83367	0.1067	1.8335	-0.018	1.83333	0.1125
1.84183	0.1248	1.842	-0.0158	1.842	0.1056	1.84183	-0.01745	1.84167	0.1123
1.85017	0.12455	1.85033	-0.01515	1.85033	0.1059	1.85017	-0.01805	1.85	0.11135
1.8585	0.1249	1.85867	-0.01545	1.85867	0.10655	1.8585	-0.01815	1.85833	0.1119
1.86683	0.12555	1.867	-0.01385	1.867	0.1073	1.86683	-0.0182	1.86667	0.1126
1.87517	0.12555	1.87533	-0.013	1.87533	0.1072	1.87517	-0.017	1.875	0.1126
1.8835	0.1254	1.88367	-0.01355	1.88367	0.1063	1.8835	-0.01825	1.88333	0.11175
1.89183	0.1247	1.892	-0.01315	1.892	0.1048	1.89183	-0.01845	1.89167	0.11265
1.90017	0.1243	1.90033	-0.0131	1.90033	0.1067	1.90017	-0.0181	1.9	0.11195
1.9085	0.124	1.90867	-0.01535	1.90867	0.1052	1.9085	-0.01945	1.90833	0.1111
1.91683	0.1227	1.917	-0.015	1.917	0.1045	1.91683	-0.02005	1.91667	0.11045
1.92517	0.1229	1.92533	-0.01615	1.92533	0.1055	1.92517	-0.02085	1.925	0.1112
1.9335	0.12365	1.93367	-0.01545	1.93367	0.1069	1.9335	-0.01715	1.93333	0.11185
1.94183	0.1244	1.942	-0.0163	1.942	0.10605	1.94183	-0.01715	1.94167	0.11175
1.95017	0.12555	1.95033	-0.01435	1.95033	0.10725	1.95017	-0.01785	1.95	0.1128
1.9585	0.12405	1.95867	-0.01485	1.95867	0.1064	1.9585	-0.019	1.95833	0.11185
1.96683	0.12585	1.967	-0.0137	1.967	0.1076	1.96683	-0.01745	1.96667	0.1127
1.97517	0.12645	1.97533	-0.01265	1.97533	0.10785	1.97517	-0.0163	1.975	0.11285
1.9835	0.12495	1.98367	-0.01285	1.98367	0.10725	1.9835	-0.01675	1.98333	0.11345
1.99183	0.12695	1.992	-0.01175	1.992	0.10895	1.99183	-0.01515	1.99167	0.1138
2.00017	0.12465	2.00033	-0.0129	2.00033	0.10895	2.00017	-0.0163	2	0.1131
2.0085	0.1235	2.00867	-0.0138	2.00867	0.1097	2.0085	-0.01565	2.00833	0.1146
2.01683	0.12525	2.017	-0.0142	2.017	0.1073	2.01683	-0.017	2.01667	0.11295
2.02517	0.12655	2.02533	-0.0132	2.02533	0.10905	2.02517	-0.01655	2.025	0.11355
2.0335	0.12575	2.03367	-0.01345	2.03367	0.10905	2.0335	-0.0157	2.03333	0.11345
2.04183	0.12365	2.042	-0.01465	2.042	0.1058	2.04183	-0.0184	2.04167	0.11215
2.05017	0.12455	2.05033	-0.01335	2.05033	0.10705	2.05017	-0.0169	2.05	0.1147
2.0585	0.1232	2.05867	-0.0158	2.05867	0.10815	2.0585	-0.01775	2.05833	0.11105
2.06683	0.1141	2.067	-0.0255	2.067	0.10195	2.06683	-0.0232	2.06667	0.1015
2.07517	0.08845	2.07533	-0.0494	2.07533	0.0839	2.07517	-0.03985	2.075	0.07715
2.0835	0.04275	2.08367	-0.09215	2.08367	0.04065	2.0835	-0.0821	2.08333	0.03155
2.09183	-0.01455	2.092	-0.15025	2.092	-0.02775	2.09183	-0.15055	2.09167	-0.03075
2.10017	-0.06495	2.10033	-0.2038	2.10033	-0.1062	2.10017	-0.2312	2.1	-0.08685
2.1085	-0.09685	2.10867	-0.23905	2.10867	-0.16585	2.1085	-0.2983	2.10833	-0.12425
2.11683	-0.10245	2.117	-0.24735	2.117	-0.18825	2.11683	-0.32165	2.11667	-0.13095
2.12517	-0.08865	2.12533	-0.23415	2.12533	-0.1615	2.12517	-0.2915	2.125	-0.11095
2.1335	-0.0655	2.13367	-0.20645	2.13367	-0.0972	2.1335	-0.2143	2.13333	-0.0733
2.14183	-0.0345	2.142	-0.1691	2.142	-0.0146	2.14183	-0.1171	2.14167	-0.02645
2.15017	0.0246	2.15033	-0.1124	2.15033	0.07215	2.15017	-0.0187	2.15	0.04505
2.1585	0.1692	2.15867	0.0161	2.15867	0.18085	2.1585	0.0788	2.15833	0.28725
2.16683	0.7039	2.167	0.45045	2.167	0.4638	2.16683	0.2394	2.16667	1.64575
2.17517	2.81765	2.17533	2.1347	2.17533	1.72315	2.17517	0.8132	2.175	7.933
2.1835	9.30935	2.18367	7.33395	2.18367	6.38445	2.1835	2.9488	2.18333	28.0284
2.19183	24.137	2.192	19.3636	2.192	18.9131	2.19183	9.00795	2.19167	72.5113
2.20017	49.9494	2.20033	40.6876	2.20033	43.8618	2.20017	21.9154	2.2	141.981
2.2085	85.3863	2.20867	70.6264	2.20867	81.9601	2.2085	43.2533	2.20833	220.621
2.21683	124.953	2.217	105.045	2.217	127.966	2.21683	71.6097	2.21667	284.118
2.22517	149.178	2.22533	138.43	2.22533	174.27	2.22517	102.868	2.225	318.179
2.2335	193.546	2.23367	167.244	2.23367	212.608	2.2335	132.286	2.23333	327.032
2.24183	214.925	2.242	188.062	2.242	240.065	2.24183	157.182	2.24167	326.017
2.25017	227.608	2.25033	200.936	2.25033	257.076	2.25017	174.666	2.25	323.912
2.2585	232.986	2.25867	206.893	2.25867	265.585	2.2585	184.953	2.25833	322.142
2.26683	232.495	2.267	207.074	2.267	267.699	2.26683	188.954	2.26667	320.484
2.27517	227.263	2.27533	202.554	2.27533	265.026	2.27517	187.653	2.275	318.793
2.2835	218.152	2.28367	194.224	2.28367	258.543	2.2835	182.022	2.28333	317.003
2.29183	205.821	2.292	182.81	2.292	248.818	2.29183	172.942	2.29167	314.988
2.30017	190.904	2.30033	169.066	2.30033	236.168	2.30017	161.22	2.3	312.383
2.3085	174.074	2.30867	153.743	2.30867	220.918	2.3085	147.623	2.30833	308.331
2.31683	156.096	2.317	137.589	2.317	203.504	2.31683	132.945	2.31667	301.787
2.32517	137.777	2.32533	121.338	2.32533	184.534	2.32517	117.886	2.325	292.168
2.3335	119.927	2.33367	105.647	2.33367	164.763	2.3335	103.103	2.33333	279.282
2.34183	103.221	2.342	91.0205	2.342	145.026	2.34183	89.1727	2.34167	263.052
2.35017	88.1466	2.35033	77.8027	2.35033	126.132	2.35017	76.5075	2.35	243.857
2.3585	74.9158	2.35867	66.1857	2.35867	108.749	2.3585	65.305	2.35833	222.606
2.36683	63.6144	2.367	56.2066	2.367	93.2882	2.36683	55.6382	2.36667	200.428
2.37517	54.1313	2.37533	47.7584	2.37533	79.9081	2.37517	47.4357	2.375	178.411
2.3835	46.2523	2.38367	40.6826	2.38367	68.5412	2.3835	40.5442	2.38333	157.501
2.39183	39.7276	2.392	34.7921	2.392	58.9639	2.39183	34.7882	2.39167	138.373
2.40017	34.3255	2.40033	29.8992	2.40033	50.9493	2.40017	30.0091	2.4	121.364
2.4085	29.3648	2.40867	25.3705	2.40867	44.2757	2.4085	25.5696	2.40833	106.522
2.41683	25.4594	2.417	21.8417	2.417	38.7041	2.41683	22.0951	2.41667	93.7019
2.42517	22.3174	2.42533	19.0367	2.42533	34.0174	2.42517	19.3121	2.425	82.7245
2.4335	19.7007	2.43367	16.7146	2.43367	29.6	2.4335	16.9793	2.43333	73.3407
2.44183	17.5093	2.442	14.7828	2.442	26.1089	2.44183	15.0099	2.44167	65.3036
2.45017	15.664	2.45033	13.17	2.45033	23.2576	2.45017	13.3466	2.45	58.4324
2.4585	14.1022	2.45867	11.8166	2.45867	20.8321	2.4585	11.9334	2.45833	52.5783
2.46683	12.7721	2.467	10.6743	2.467	18.7718	2.46683	10.7339	2.46667	47.5714
2.47517	11.6344	2.47533	9.7019	2.47533	17.0215	2.47517	9.7102	2.475	43.2641
2.4835	10.6529	2.48367	8.8699	2.48367	15.5151	2.4835	8.83075	2.48333	39.541
2.49183	9.7984	2.492	8.1494	2.492	14.2051	2.49183	8.0711	2.49167	36.3092
2.50017	9.0504	2.50033	7.5121	2.50033	13.0574	2.50017	7.4072	2.5	33.4755
2.5085	8.3835	2.50867	6.94025	2.50867	12.0447	2.5085	6.82105	2.50833	30.5308
2.51683	7.78925	2.517	6.43015	2.517	11.1399	2.51683	6.2999	2.51667	28.1663
2.52517	7.24865	2.52533	5.9659	2.52533	10.3235	2.52517	5.83015	2.525	26.1658
2.5335	6.74875	2.53367	5.5379	2.53367	9.57645	2.5335	5.3942	2.53333	24.362
2.54183	6.29395	2.542	5.1441	2.542	8.896	2.54183	5.00635	2.54167	22.7192
2.55017	5.86775	2.55033	4.77345	2.55033	8.26535	2.55017	4.64575	2.55	21.2023
2.5585	5.469	2.55867	4.42695	2.55867	7.6794	2.5585	4.30945	2.55833	19.7926
2.56683	5.09415	2.567	4.1046	2.567	7.1378	2.56683	3.9956	2.56667	18.4754
2.57517	4.74475	2.57533	3.80325	2.57533	6.6319	2.57517	3.7063	2.575	17.2437
2.5835	4.41595	2.58367	3.5216	2.58367	6.1669	2.5835	3.43555	2.58333	16.0869
2.59183	4.11325	2.592	3.2603	2.592	5.7353	2.59183	3.1845	2.59167	15.0098
2.60017	3.8349	2.60033	3.01505	2.60033	5.33335	2.60017	2.94865	2.6	14.0046
2.6085	3.57865	2.60867	2.79055	2.60867	4.9623	2.6085	2.7342	2.60833	13.0753
2.61683	3.3384	2.617	2.5825	2.617	4.61965	2.61683	2.5335	2.61667	12.215
2.62517	3.1187	2.62533	2.3926	2.62533	4.3052	2.62517	2.35045	2.625	11.4251
2.6335	2.9168	2.63367	2.21835	2.63367	4.0164	2.6335	2.18045	2.63333	10.6931
2.64183	2.73295	2.642	2.06145	2.642	3.7521	2.64183	2.02495	2.64167	10.0333
2.65017	2.56305	2.65033	1.91855	2.65033	3.50955	2.65017	1.8823	2.65	9.43095
2.6585	2.40865	2.65867	1.787	2.65867	3.28865	2.6585	1.75165	2.65833	8.8771
2.66683	2.2663	2.667	1.6679	2.667	3.08525	2.66683	1.63175	2.66667	8.3705
2.67517	2.13735	2.67533	1.5618	2.67533	2.9028	2.67517	1.52605	2.675	7.90975
2.6835	2.0176	2.68367	1.46335	2.68367	2.7384	2.6835	1.43015	2.68333	7.49125
2.69183	1.9095	2.692	1.37455	2.692	2.58795	2.69183	1.3435	2.69167	7.1125
2.70017	1.8084	2.70033	1.29255	2.70033	2.4525	2.70017	1.2649	2.7	6.77055
2.7085	1.71765	2.70867	1.2183	2.70867	2.3299	2.7085	1.19455	2.70833	6.46035
2.71683	1.6375	2.717	1.15035	2.717	2.22045	2.71683	1.1322	2.71667	6.17885
2.72517	1.5596	2.72533	1.08655	2.72533	2.11915	2.72517	1.07265	2.725	5.91945
2.7335	1.49065	2.73367	1.0262	2.73367	2.024	2.7335	1.018	2.73333	5.6836
2.74183	1.42935	2.742	0.9761	2.742	1.94095	2.74183	0.972	2.74167	5.46945
2.75017	1.37215	2.75033	0.9268	2.75033	1.8615	2.75017	0.9263	2.75	5.2686
2.7585	1.3197	2.75867	0.88175	2.75867	1.78425	2.7585	0.8831	2.75833	5.08095
2.76683	1.27415	2.767	0.8394	2.767	1.715	2.76683	0.8439	2.76667	4.90465
2.77517	1.2303	2.77533	0.80015	2.77533	1.65335	2.77517	0.8044	2.775	4.7364
2.7835	1.19045	2.78367	0.76275	2.78367	1.5918	2.7835	0.76935	2.78333	4.58005
2.79183	1.1497	2.792	0.72615	2.792	1.53105	2.79183	0.7318	2.79167	4.429
2.80017	1.11565	2.80033	0.6918	2.80033	1.4755	2.80017	0.7005	2.8	4.28835
2.8085	1.0802	2.80867	0.65935	2.80867	1.42055	2.8085	0.6647	2.80833	4.1513
2.81683	1.04695	2.817	0.63025	2.817	1.3692	2.81683	0.6333	2.81667	4.01945
2.82517	1.01425	2.82533	0.60115	2.82533	1.31815	2.82517	0.60455	2.825	3.8968
2.8335	0.9779	2.83367	0.5747	2.83367	1.2688	2.8335	0.57525	2.83333	3.77475
2.84183	0.94375	2.842	0.5455	2.842	1.2189	2.84183	0.5458	2.84167	3.65395
2.85017	0.90945	2.85033	0.51685	2.85033	1.1716	2.85017	0.5157	2.85	3.5352
2.8585	0.87515	2.85867	0.49125	2.85867	1.1263	2.8585	0.4886	2.85833	3.42205
2.86683	0.8422	2.867	0.46535	2.867	1.0826	2.86683	0.4619	2.86667	3.31025
2.87517	0.80955	2.87533	0.44005	2.87533	1.0405	2.87517	0.4378	2.875	3.20395
2.8835	0.77605	2.88367	0.41715	2.88367	1.0005	2.8835	0.4124	2.88333	3.09945
2.89183	0.74545	2.892	0.39435	2.892	0.9602	2.89183	0.38835	2.89167	3.0002
2.90017	0.7166	2.90033	0.37065	2.90033	0.9201	2.90017	0.3642	2.9	2.901
2.9085	0.68705	2.90867	0.34715	2.90867	0.88135	2.9085	0.34285	2.90833	2.80745
2.91683	0.6578	2.917	0.3264	2.917	0.84565	2.91683	0.3209	2.91667	2.7153
2.92517	0.6304	2.92533	0.30425	2.92533	0.8085	2.92517	0.3009	2.925	2.62365
2.9335	0.60505	2.93367	0.28425	2.93367	0.77525	2.9335	0.28155	2.93333	2.54065
2.94183	0.57945	2.942	0.2645	2.942	0.74405	2.94183	0.26165	2.94167	2.4605
2.95017	0.5566	2.95033	0.24755	2.95033	0.71345	2.95017	0.24545	2.95	2.3847
2.9585	0.536	2.95867	0.22955	2.95867	0.68465	2.9585	0.23045	2.95833	2.31095
2.96683	0.51145	2.967	0.2117	2.967	0.6569	2.96683	0.21175	2.96667	2.2373
2.97517	0.4894	2.97533	0.1924	2.97533	0.6308	2.97517	0.1957	2.975	2.1675
2.9835	0.4689	2.98367	0.1761	2.98367	0.6035	2.9835	0.1793	2.98333	2.1004
2.99183	0.4504	2.992	0.1624	2.992	0.583	2.99183	0.1654	2.99167	2.03675
3.00017	0.43045	3.00033	0.14585	3.00033	0.55805	3.00017	0.1502	3	1.9744
3.0085	0.41435	3.00867	0.1329	3.00867	0.53535	3.0085	0.13845	3.00833	1.9147
3.01683	0.3964	3.017	0.11885	3.017	0.5144	3.01683	0.12365	3.01667	1.8577
3.02517	0.38135	3.02533	0.1069	3.02533	0.4938	3.02517	0.11125	3.025	1.8019
3.0335	0.3628	3.03367	0.09185	3.03367	0.4716	3.0335	0.097	3.03333	1.74665
3.04183	0.34855	3.042	0.07965	3.042	0.453	3.04183	0.0854	3.04167	1.69815
3.05017	0.33415	3.05033	0.0694	3.05033	0.4308	3.05017	0.0745	3.05	1.6498
3.0585	0.32065	3.05867	0.0583	3.05867	0.4133	3.0585	0.06385	3.05833	1.6028
3.06683	0.30505	3.067	0.0466	3.067	0.39645	3.06683	0.0533	3.06667	1.55635
3.07517	0.29055	3.07533	0.0351	3.07533	0.3766	3.07517	0.04015	3.075	1.51
3.0835	0.2781	3.08367	0.0264	3.08367	0.35975	3.0835	0.03105	3.08333	1.4691
3.09183	0.26575	3.092	0.01565	3.092	0.34395	3.09183	0.0215	3.09167	1.4266
3.10017	0.25305	3.10033	0.0064	3.10033	0.32645	3.10017	0.0114	3.1	1.38515
3.1085	0.24075	3.10867	-0.00285	3.10867	0.31155	3.1085	0.00135	3.10833	1.3457
3.11683	0.2318	3.117	-0.00945	3.117	0.298	3.11683	-0.0039	3.11667	1.3099
3.12517	0.2228	3.12533	-0.01835	3.12533	0.28445	3.12517	-0.0124	3.125	1.27295
3.1335	0.21225	3.13367	-0.02565	3.13367	0.27035	3.1335	-0.02165	3.13333	1.23725
3.14183	0.2032	3.142	-0.0351	3.142	0.2543	3.14183	-0.0284	3.14167	1.2036
3.15017	0.1926	3.15033	-0.0433	3.15033	0.24255	3.15017	-0.0362	3.15	1.1695
3.1585	0.1836	3.15867	-0.0523	3.15867	0.22835	3.1585	-0.0455	3.15833	1.1372
3.16683	0.17315	3.167	-0.05925	3.167	0.21455	3.16683	-0.05385	3.16667	1.1045
3.17517	0.1671	3.17533	-0.0635	3.17533	0.20565	3.17517	-0.05895	3.175	1.07625
3.1835	0.15995	3.18367	-0.0681	3.18367	0.1964	3.1835	-0.06515	3.18333	1.04695
3.19183	0.15305	3.192	-0.0734	3.192	0.18745	3.19183	-0.06965	3.19167	1.01995
3.20017	0.14545	3.20033	-0.0791	3.20033	0.17895	3.20017	-0.07455	3.2	0.99615
3.2085	0.13715	3.20867	-0.0848	3.20867	0.16845	3.2085	-0.0803	3.20833	0.96825
3.21683	0.128	3.217	-0.0914	3.217	0.16005	3.21683	-0.0856	3.21667	0.9458
3.22517	0.1198	3.22533	-0.09835	3.22533	0.15	3.22517	-0.0899	3.225	0.92385
3.2335	0.1148	3.23367	-0.1024	3.23367	0.1418	3.2335	-0.09715	3.23333	0.90145
3.24183	0.10785	3.242	-0.1056	3.242	0.1344	3.24183	-0.1019	3.24167	0.88045
3.25017	0.1017	3.25033	-0.11135	3.25033	0.12545	3.25017	-0.10635	3.25	0.8577
3.2585	0.09615	3.25867	-0.11355	3.25867	0.11845	3.2585	-0.1096	3.25833	0.8384
3.26683	0.09025	3.267	-0.11765	3.267	0.11135	3.26683	-0.11375	3.26667	0.8171
3.27517	0.0856	3.27533	-0.1211	3.27533	0.1046	3.27517	-0.11615	3.275	0.79805
3.2835	0.0791	3.28367	-0.12595	3.28367	0.0977	3.2835	-0.121	3.28333	0.7783
3.29183	0.0735	3.292	-0.1296	3.292	0.09135	3.29183	-0.1237	3.29167	0.759
3.30017	0.06765	3.30033	-0.13475	3.30033	0.0832	3.30017	-0.12865	3.3	0.7401
3.3085	0.0622	3.30867	-0.1378	3.30867	0.0778	3.3085	-0.1307	3.30833	0.7226
3.31683	0.0562	3.317	-0.1433	3.317	0.07005	3.31683	-0.1352	3.31667	0.70255
3.32517	0.05445	3.32533	-0.14545	3.32533	0.0653	3.32517	-0.1375	3.325	0.6859
3.3335	0.0522	3.33367	-0.14685	3.33367	0.06005	3.3335	-0.13955	3.33333	0.67195
3.34183	0.04835	3.342	-0.1504	3.342	0.0546	3.34183	-0.14345	3.34167	0.65595
3.35017	0.0476	3.35033	-0.1516	3.35033	0.0517	3.35017	-0.1452	3.35	0.64335
3.3585	0.04975	3.35867	-0.1513	3.35867	0.05245	3.3585	-0.14425	3.35833	0.6341
3.36683	0.05015	3.367	-0.15095	3.367	0.05245	3.36683	-0.1432	3.36667	0.62515
3.37517	0.05155	3.37533	-0.14985	3.37533	0.05415	3.37517	-0.14125	3.375	0.61745
3.3835	0.0534	3.38367	-0.1506	3.38367	0.05475	3.3835	-0.1389	3.38333	0.6115
3.39183	0.0539	3.392	-0.14925	3.392	0.05405	3.39183	-0.13885	3.39167	0.60455
3.40017	0.0546	3.40033	-0.1485	3.40033	0.0534	3.40017	-0.1383	3.4	0.5963
3.4085	0.0529	3.40867	-0.1495	3.40867	0.05385	3.4085	-0.1368	3.40833	0.5894
3.41683	0.05225	3.417	-0.14925	3.417	0.0524	3.41683	-0.13525	3.41667	0.58065
3.42517	0.0508	3.42533	-0.15015	3.42533	0.05005	3.42517	-0.13555	3.425	0.56935
3.4335	0.05165	3.43367	-0.14795	3.43367	0.04895	3.4335	-0.1334	3.43333	0.5593
3.44183	0.04615	3.442	-0.15165	3.442	0.04545	3.44183	-0.13545	3.44167	0.5454
3.45017	0.0455	3.45033	-0.1497	3.45033	0.04285	3.45017	-0.1355	3.45	0.53405
3.4585	0.04255	3.45867	-0.1525	3.45867	0.0389	3.4585	-0.13705	3.45833	0.5211
3.46683	0.0401	3.467	-0.154	3.467	0.03575	3.46683	-0.13845	3.46667	0.50835
3.47517	0.03635	3.47533	-0.15515	3.47533	0.0326	3.47517	-0.1388	3.475	0.4957
3.4835	0.0369	3.48367	-0.1544	3.48367	0.0295	3.4835	-0.13885	3.48333	0.48565
3.49183	0.0339	3.492	-0.1562	3.492	0.02755	3.49183	-0.14125	3.49167	0.47415
3.50017	0.0319	3.50033	-0.1579	3.50033	0.0242	3.50017	-0.14245	3.5	0.4614
3.5085	0.0296	3.50867	-0.16005	3.50867	0.02135	3.5085	-0.14435	3.50833	0.4479
3.51683	0.0257	3.517	-0.16015	3.517	0.018	3.51683	-0.1451	3.51667	0.4376
3.52517	0.02375	3.52533	-0.1613	3.52533	0.01395	3.52517	-0.14515	3.525	0.42755
3.5335	0.0193	3.53367	-0.16405	3.53367	0.0097	3.5335	-0.14905	3.53333	0.41525
3.54183	0.01575	3.542	-0.16775	3.542	0.0059	3.54183	-0.1519	3.54167	0.40465
3.55017	0.01595	3.55033	-0.16755	3.55033	0.0047	3.55017	-0.1514	3.55	0.3985
3.5585	0.01225	3.55867	-0.17005	3.55867	0.0018	3.5585	-0.1536	3.55833	0.38745
3.56683	0.0112	3.567	-0.1701	3.567	-0.00055	3.56683	-0.1546	3.56667	0.37775
3.57517	0.00865	3.57533	-0.1722	3.57533	-0.0038	3.57517	-0.15695	3.575	0.3685
3.5835	0.0065	3.58367	-0.1727	3.58367	-0.0066	3.5835	-0.1588	3.58333	0.3602
3.59183	0.0047	3.592	-0.1742	3.592	-0.0071	3.59183	-0.15975	3.59167	0.3519
3.60017	0.0029	3.60033	-0.1763	3.60033	-0.01075	3.60017	-0.163	3.6	0.34345
3.6085	0.0011	3.60867	-0.1777	3.60867	-0.0128	3.6085	-0.16365	3.60833	0.3352
3.61683	0.00015	3.617	-0.17845	3.617	-0.01335	3.61683	-0.16515	3.61667	0.3299
3.62517	-0.0032	3.62533	-0.1789	3.62533	-0.015	3.62517	-0.16435	3.625	0.3204
3.6335	-0.0023	3.63367	-0.1794	3.63367	-0.01745	3.6335	-0.16595	3.63333	0.315
3.64183	-0.00305	3.642	-0.1793	3.642	-0.019	3.64183	-0.1672	3.64167	0.30805
3.65017	-0.005	3.65033	-0.18015	3.65033	-0.02115	3.65017	-0.16825	3.65	0.30145
3.6585	-0.00455	3.65867	-0.1779	3.65867	-0.0219	3.6585	-0.168	3.65833	0.29395
3.66683	-0.00735	3.667	-0.1816	3.667	-0.0237	3.66683	-0.1689	3.66667	0.2861
3.67517	-0.0091	3.67533	-0.1816	3.67533	-0.02515	3.67517	-0.1706	3.675	0.2783
3.6835	-0.01035	3.68367	-0.1834	3.68367	-0.02655	3.6835	-0.17115	3.68333	0.27135
3.69183	-0.01065	3.692	-0.18195	3.692	-0.027	3.69183	-0.17025	3.69167	0.2658
3.70017	-0.0116	3.70033	-0.1825	3.70033	-0.02785	3.70017	-0.16895	3.7	0.2605
3.7085	-0.01285	3.70867	-0.18525	3.70867	-0.0318	3.7085	-0.17245	3.70833	0.2517
3.71683	-0.0134	3.717	-0.1863	3.717	-0.03275	3.71683	-0.1726	3.71667	0.24505
3.72517	-0.0153	3.72533	-0.18875	3.72533	-0.0351	3.72517	-0.17515	3.725	0.23755
3.7335	-0.0176	3.73367	-0.19035	3.73367	-0.03555	3.7335	-0.1761	3.73333	0.2309
3.74183	-0.01735	3.742	-0.18785	3.742	-0.03555	3.74183	-0.1758	3.74167	0.2263
3.75017	-0.01925	3.75033	-0.1903	3.75033	-0.03525	3.75017	-0.17705	3.75	0.21875
3.7585	-0.02025	3.75867	-0.1904	3.75867	-0.03815	3.7585	-0.17795	3.75833	0.21175
3.76683	-0.02015	3.767	-0.19025	3.767	-0.0388	3.76683	-0.17895	3.76667	0.2077
3.77517	-0.02085	3.77533	-0.19	3.77533	-0.03825	3.77517	-0.1791	3.775	0.2031
3.7835	-0.02255	3.78367	-0.19185	3.78367	-0.03995	3.7835	-0.17865	3.78333	0.196
3.79183	-0.02275	3.792	-0.194	3.792	-0.041	3.79183	-0.18005	3.79167	0.191
3.80017	-0.02435	3.80033	-0.19435	3.80033	-0.0418	3.80017	-0.181	3.8	0.1844
3.8085	-0.0247	3.80867	-0.19545	3.80867	-0.0423	3.8085	-0.1805	3.80833	0.1806
3.81683	-0.02595	3.817	-0.194	3.817	-0.0434	3.81683	-0.1794	3.81667	0.1752
3.82517	-0.02575	3.82533	-0.194	3.82533	-0.0442	3.82517	-0.1803	3.825	0.17155
3.8335	-0.0269	3.83367	-0.1951	3.83367	-0.0449	3.8335	-0.18205	3.83333	0.167
3.84183	-0.0257	3.842	-0.1944	3.842	-0.0455	3.84183	-0.18115	3.84167	0.16355
3.85017	-0.0283	3.85033	-0.19525	3.85033	-0.0461	3.85017	-0.18325	3.85	0.1583
3.8585	-0.0286	3.85867	-0.19475	3.85867	-0.04835	3.8585	-0.183	3.85833	0.15545
3.86683	-0.0296	3.867	-0.1957	3.867	-0.0479	3.86683	-0.18255	3.86667	0.15085
3.87517	-0.02975	3.87533	-0.1967	3.87533	-0.0501	3.87517	-0.1831	3.875	0.1468
3.8835	-0.0297	3.88367	-0.1974	3.88367	-0.05	3.8835	-0.1838	3.88333	0.14305
3.89183	-0.0293	3.892	-0.1962	3.892	-0.0501	3.89183	-0.1833	3.89167	0.14065
3.90017	-0.0316	3.90033	-0.19865	3.90033	-0.05225	3.90017	-0.18485	3.9	0.13525
3.9085	-0.02935	3.90867	-0.19815	3.90867	-0.0522	3.9085	-0.18405	3.90833	0.1325
3.91683	-0.0315	3.917	-0.1983	3.917	-0.05315	3.91683	-0.18405	3.91667	0.12885
3.92517	-0.03005	3.92533	-0.1989	3.92533	-0.05445	3.92517	-0.18455	3.925	0.12495
3.9335	-0.0329	3.93367	-0.1997	3.93367	-0.05525	3.9335	-0.1863	3.93333	0.12135
3.94183	-0.032	3.942	-0.19805	3.942	-0.0538	3.94183	-0.1851	3.94167	0.11735
3.95017	-0.03395	3.95033	-0.2017	3.95033	-0.05715	3.95017	-0.1876	3.95	0.113
3.9585	-0.03395	3.95867	-0.20095	3.95867	-0.05755	3.9585	-0.18695	3.95833	0.1103
3.96683	-0.0336	3.967	-0.2009	3.967	-0.0578	3.96683	-0.189	3.96667	0.1077
3.97517	-0.0355	3.97533	-0.20385	3.97533	-0.0591	3.97517	-0.1913	3.975	0.1015
3.9835	-0.0351	3.98367	-0.20275	3.98367	-0.0601	3.9835	-0.18955	3.98333	0.10055
3.99183	-0.0338	3.992	-0.20185	3.992	-0.05855	3.99183	-0.18965	3.99167	0.09835
4.00017	-0.03325	4.00033	-0.2018	4.00033	-0.0587	4.00017	-0.1891	4	0.0959
4.0085	-0.03545	4.00867	-0.20195	4.00867	-0.05995	4.0085	-0.18955	4.00833	0.0921
4.01683	-0.03515	4.017	-0.2011	4.017	-0.06115	4.01683	-0.1896	4.01667	0.0891
4.02517	-0.03755	4.02533	-0.2036	4.02533	-0.0634	4.02517	-0.1932	4.025	0.084
4.0335	-0.03665	4.03367	-0.20185	4.03367	-0.06235	4.0335	-0.19005	4.03333	0.08195
4.04183	-0.0366	4.042	-0.20195	4.042	-0.06155	4.04183	-0.19165	4.04167	0.07905
4.05017	-0.0384	4.05033	-0.2005	4.05033	-0.06155	4.05017	-0.18905	4.05	0.078
4.0585	-0.03895	4.05867	-0.2014	4.05867	-0.06375	4.0585	-0.18955	4.05833	0.07285
4.06683	-0.0368	4.067	-0.20155	4.067	-0.0612	4.06683	-0.189	4.06667	0.07245
4.07517	-0.03705	4.07533	-0.20225	4.07533	-0.0623	4.07517	-0.191	4.075	0.0671
4.0835	-0.03585	4.08367	-0.20155	4.08367	-0.062	4.0835	-0.18865	4.08333	0.06675
4.09183	-0.03565	4.092	-0.20195	4.092	-0.06255	4.09183	-0.189	4.09167	0.06495
4.10017	-0.0373	4.10033	-0.20185	4.10033	-0.06285	4.10017	-0.19045	4.1	0.0612
4.1085	-0.0365	4.10867	-0.20215	4.10867	-0.06165	4.1085	-0.18985	4.10833	0.06145
4.11683	-0.036	4.117	-0.2	4.117	-0.06145	4.11683	-0.18835	4.11667	0.0608
4.12517	-0.0363	4.12533	-0.2006	4.12533	-0.06165	4.12517	-0.1894	4.125	0.05935
4.1335	-0.0367	4.13367	-0.19985	4.13367	-0.06225	4.1335	-0.18965	4.13333	0.05505
4.14183	-0.0371	4.142	-0.20075	4.142	-0.0628	4.14183	-0.18905	4.14167	0.05305
4.15017	-0.03765	4.15033	-0.20115	4.15033	-0.0636	4.15017	-0.1899	4.15	0.05075
4.1585	-0.03805	4.15867	-0.20115	4.15867	-0.06435	4.1585	-0.19015	4.15833	0.049
4.16683	-0.0384	4.167	-0.203	4.167	-0.06395	4.16683	-0.1902	4.16667	0.0484
4.17517	-0.0368	4.17533	-0.2005	4.17533	-0.06315	4.17517	-0.1894	4.175	0.04835
4.1835	-0.0371	4.18367	-0.2006	4.18367	-0.0644	4.1835	-0.18915	4.18333	0.0445
4.19183	-0.0377	4.192	-0.2001	4.192	-0.0654	4.19183	-0.1887	4.19167	0.0423
4.20017	-0.03975	4.20033	-0.20045	4.20033	-0.06405	4.20017	-0.1908	4.2	0.03995
4.2085	-0.03735	4.20867	-0.19955	4.20867	-0.06475	4.2085	-0.19075	4.20833	0.03815
4.21683	-0.03685	4.217	-0.19985	4.217	-0.0665	4.21683	-0.1893	4.21667	0.0363
4.22517	-0.03685	4.22533	-0.1996	4.22533	-0.06505	4.22517	-0.19045	4.225	0.0345
4.2335	-0.03695	4.23367	-0.198	4.23367	-0.0645	4.2335	-0.19025	4.23333	0.0341
4.24183	-0.0363	4.242	-0.19885	4.242	-0.0648	4.24183	-0.18935	4.24167	0.0324
4.25017	-0.03685	4.25033	-0.1995	4.25033	-0.066	4.25017	-0.1918	4.25	0.0304
4.2585	-0.03715	4.25867	-0.199	4.25867	-0.06495	4.2585	-0.1902	4.25833	0.0291
4.26683	-0.0374	4.267	-0.1989	4.267	-0.0653	4.26683	-0.18925	4.26667	0.03025
4.27517	-0.03565	4.27533	-0.19875	4.27533	-0.0644	4.27517	-0.19	4.275	0.02635
4.2835	-0.03635	4.28367	-0.19855	4.28367	-0.0633	4.2835	-0.1903	4.28333	0.02495
4.29183	-0.03825	4.292	-0.1999	4.292	-0.0646	4.29183	-0.1914	4.29167	0.0226
4.30017	-0.0363	4.30033	-0.1983	4.30033	-0.06395	4.30017	-0.19	4.3	0.02125
4.3085	-0.037	4.30867	-0.19795	4.30867	-0.06255	4.3085	-0.18815	4.30833	0.0219
4.31683	-0.03625	4.317	-0.19865	4.317	-0.0615	4.31683	-0.1882	4.31667	0.01905
4.32517	-0.03675	4.32533	-0.1984	4.32533	-0.06205	4.32517	-0.1886	4.325	0.01705
4.3335	-0.0367	4.33367	-0.197	4.33367	-0.06185	4.3335	-0.18975	4.33333	0.0176
4.34183	-0.03925	4.342	-0.1986	4.342	-0.06345	4.34183	-0.19145	4.34167	0.01405
4.35017	-0.03955	4.35033	-0.20025	4.35033	-0.0646	4.35017	-0.1931	4.35	0.0123
4.3585	-0.03905	4.35867	-0.20025	4.35867	-0.06335	4.3585	-0.1919	4.35833	0.0105
4.36683	-0.0383	4.367	-0.1994	4.367	-0.0639	4.36683	-0.19235	4.36667	0.0091
4.37517	-0.0391	4.37533	-0.20025	4.37533	-0.0621	4.37517	-0.19085	4.375	0.0095
4.3835	-0.03905	4.38367	-0.1996	4.38367	-0.0629	4.3835	-0.1909	4.38333	0.0067
4.39183	-0.0401	4.392	-0.19875	4.392	-0.06495	4.39183	-0.19255	4.39167	0.0047
4.40017	-0.03885	4.40033	-0.19845	4.40033	-0.0635	4.40017	-0.19245	4.4	0.0039
4.4085	-0.0367	4.40867	-0.19775	4.40867	-0.06305	4.4085	-0.1914	4.40833	0.00445
4.41683	-0.0385	4.417	-0.19685	4.417	-0.06215	4.41683	-0.19045	4.41667	0.00395
4.42517	-0.0369	4.42533	-0.1977	4.42533	-0.0618	4.42517	-0.1906	4.425	0.00285
4.4335	-0.0357	4.43367	-0.19565	4.43367	-0.06085	4.4335	-0.18965	4.43333	0.0024
4.44183	-0.0358	4.442	-0.1962	4.442	-0.0599	4.44183	-0.1893	4.44167	0.00195
4.45017	-0.03565	4.45033	-0.1949	4.45033	-0.05965	4.45017	-0.1894	4.45	0.0015
4.4585	-0.03665	4.45867	-0.19635	4.45867	-0.0612	4.4585	-0.1893	4.45833	-0.0002
4.46683	-0.03555	4.467	-0.1952	4.467	-0.05955	4.46683	-0.1886	4.46667	0.0006
4.47517	-0.03525	4.47533	-0.19565	4.47533	-0.05895	4.47517	-0.1881	4.475	-0.00075
4.4835	-0.03545	4.48367	-0.1966	4.48367	-0.05885	4.4835	-0.1897	4.48333	-0.002
4.49183	-0.0345	4.492	-0.1947	4.492	-0.05795	4.49183	-0.1877	4.49167	-0.0013
4.50017	-0.03395	4.50033	-0.1949	4.50033	-0.05735	4.50017	-0.18675	4.5	-0.00095
4.5085	-0.03315	4.50867	-0.19495	4.50867	-0.0593	4.5085	-0.18635	4.50833	-0.00235
4.51683	-0.0341	4.517	-0.1946	4.517	-0.05855	4.51683	-0.18815	4.51667	-0.00335
4.52517	-0.03335	4.52533	-0.1941	4.52533	-0.0582	4.52517	-0.18855	4.525	-0.00385
4.5335	-0.0345	4.53367	-0.1968	4.53367	-0.05975	4.5335	-0.1899	4.53333	-0.00475
4.54183	-0.03475	4.542	-0.1966	4.542	-0.05905	4.54183	-0.19085	4.54167	-0.00575
4.55017	-0.03645	4.55033	-0.1979	4.55033	-0.0602	4.55017	-0.1917	4.55	-0.00825
4.5585	-0.03285	4.55867	-0.19485	4.55867	-0.05895	4.5585	-0.18945	4.55833	-0.0069
4.56683	-0.0338	4.567	-0.1949	4.567	-0.0575	4.56683	-0.1889	4.56667	-0.0085
4.57517	-0.03185	4.57533	-0.1937	4.57533	-0.0589	4.57517	-0.1887	4.575	-0.0099
4.5835	-0.0323	4.58367	-0.19375	4.58367	-0.05805	4.5835	-0.18985	4.58333	-0.00915
4.59183	-0.0312	4.592	-0.19275	4.592	-0.05655	4.59183	-0.1879	4.59167	-0.0093
4.60017	-0.03145	4.60033	-0.19385	4.60033	-0.0574	4.60017	-0.1887	4.6	-0.01175
4.6085	-0.0319	4.60867	-0.19255	4.60867	-0.05505	4.6085	-0.18835	4.60833	-0.01
4.61683	-0.03095	4.617	-0.19265	4.617	-0.0547	4.61683	-0.18735	4.61667	-0.0108
4.62517	-0.02935	4.62533	-0.19075	4.62533	-0.05385	4.62517	-0.18615	4.625	-0.00985
4.6335	-0.02965	4.63367	-0.191	4.63367	-0.051	4.6335	-0.18675	4.63333	-0.0104
4.64183	-0.0307	4.642	-0.19035	4.642	-0.05175	4.64183	-0.1869	4.64167	-0.00955
4.65017	-0.0292	4.65033	-0.191	4.65033	-0.05415	4.65017	-0.1878	4.65	-0.013
4.6585	-0.03075	4.65867	-0.1924	4.65867	-0.0549	4.6585	-0.1893	4.65833	-0.0123
4.66683	-0.031	4.667	-0.192	4.667	-0.0539	4.66683	-0.1871	4.66667	-0.01435
4.67517	-0.03025	4.67533	-0.1915	4.67533	-0.05395	4.67517	-0.18735	4.675	-0.01285
4.6835	-0.02785	4.68367	-0.189	4.68367	-0.0502	4.6835	-0.1847	4.68333	-0.01125
4.69183	-0.0274	4.692	-0.19115	4.692	-0.05025	4.69183	-0.18645	4.69167	-0.0123
4.70017	-0.028	4.70033	-0.1906	4.70033	-0.0518	4.70017	-0.18595	4.7	-0.0135
4.7085	-0.0265	4.70867	-0.18855	4.70867	-0.0502	4.7085	-0.1857	4.70833	-0.01195
4.71683	-0.02665	4.717	-0.18875	4.717	-0.0505	4.71683	-0.1855	4.71667	-0.0122
4.72517	-0.0273	4.72533	-0.19075	4.72533	-0.05115	4.72517	-0.18695	4.725	-0.01385
4.7335	-0.02585	4.73367	-0.1884	4.73367	-0.04905	4.7335	-0.185	4.73333	-0.0127
4.74183	-0.02725	4.742	-0.18925	4.742	-0.0491	4.74183	-0.18655	4.74167	-0.0136
4.75017	-0.02575	4.75033	-0.1873	4.75033	-0.04855	4.75017	-0.18465	4.75	-0.0137
4.7585	-0.02655	4.75867	-0.1878	4.75867	-0.0489	4.7585	-0.18485	4.75833	-0.01405
4.76683	-0.02575	4.767	-0.1872	4.767	-0.04865	4.76683	-0.18485	4.76667	-0.0147
4.77517	-0.0255	4.77533	-0.1867	4.77533	-0.04765	4.77517	-0.1835	4.775	-0.0146
4.7835	-0.023	4.78367	-0.1862	4.78367	-0.0462	4.7835	-0.18305	4.78333	-0.0141
4.79183	-0.02415	4.792	-0.1857	4.792	-0.0443	4.79183	-0.18455	4.79167	-0.0123
4.80017	-0.0243	4.80033	-0.18555	4.80033	-0.047	4.80017	-0.18455	4.8	-0.0135
4.8085	-0.02255	4.80867	-0.18335	4.80867	-0.04435	4.8085	-0.1821	4.80833	-0.01245
4.81683	-0.0236	4.817	-0.18525	4.817	-0.04255	4.81683	-0.1819	4.81667	-0.0128
4.82517	-0.0226	4.82533	-0.185	4.82533	-0.04175	4.82517	-0.1822	4.825	-0.01195
4.8335	-0.02195	4.83367	-0.18425	4.83367	-0.04115	4.8335	-0.18315	4.83333	-0.01235
4.84183	-0.02	4.842	-0.18455	4.842	-0.04	4.84183	-0.1812	4.84167	-0.01165
4.85017	-0.02255	4.85033	-0.18355	4.85033	-0.039	4.85017	-0.18315	4.85	-0.0099
4.8585	-0.0199	4.85867	-0.1827	4.85867	-0.0373	4.8585	-0.18085	4.85833	-0.0095
4.86683	-0.019	4.867	-0.182	4.867	-0.03515	4.86683	-0.1801	4.86667	-0.00775
4.87517	-0.0195	4.87533	-0.18185	4.87533	-0.0342	4.87517	-0.18075	4.875	-0.0087
4.8835	-0.01815	4.88367	-0.182	4.88367	-0.03325	4.8835	-0.1797	4.88333	-0.0074
4.89183	-0.0174	4.892	-0.1803	4.892	-0.0317	4.89183	-0.18105	4.89167	-0.0073
4.90017	-0.0174	4.90033	-0.1811	4.90033	-0.0328	4.90017	-0.1821	4.9	-0.00675
4.9085	-0.018	4.90867	-0.18135	4.90867	-0.03385	4.9085	-0.18095	4.90833	-0.0077
4.91683	-0.01585	4.917	-0.1801	4.917	-0.0327	4.91683	-0.18105	4.91667	-0.00675
4.92517	-0.01815	4.92533	-0.17925	4.92533	-0.032	4.92517	-0.18065	4.925	-0.00655
4.9335	-0.01725	4.93367	-0.178	4.93367	-0.03095	4.9335	-0.1794	4.93333	-0.00465
4.94183	-0.0152	4.942	-0.1776	4.942	-0.0317	4.94183	-0.17915	4.94167	-0.00875
4.95017	-0.01575	4.95033	-0.17655	4.95033	-0.03185	4.95017	-0.1797	4.95	-0.0077
4.9585	-0.01485	4.95867	-0.17355	4.95867	-0.02965	4.9585	-0.17845	4.95833	-0.00565
4.96683	-0.0125	4.967	-0.17355	4.967	-0.02905	4.96683	-0.1762	4.96667	-0.0051
4.97517	-0.01285	4.97533	-0.1737	4.97533	-0.02845	4.97517	-0.17955	4.975	-0.00605
4.9835	-0.01245	4.98367	-0.1732	4.98367	-0.0277	4.9835	-0.1771	4.98333	-0.00555
4.99183	-0.0096	4.992	-0.1704	4.992	-0.02625	4.99183	-0.17525	4.99167	-0.00315
5.00017	-0.00775	5.00033	-0.16945	5.00033	-0.02515	5.00017	-0.17215	5	-0.00265
5.0085	-0.0088	5.00867	-0.17155	5.00867	-0.02525	5.0085	-0.1743	5.00833	-0.0037
5.01683	-0.008	5.017	-0.1719	5.017	-0.02515	5.01683	-0.17315	5.01667	-0.00375
5.02517	-0.00605	5.02533	-0.16985	5.02533	-0.02375	5.02517	-0.17215	5.025	-0.00255
5.0335	-0.00705	5.03367	-0.1697	5.03367	-0.0235	5.0335	-0.1714	5.03333	-0.0023
5.04183	-0.0064	5.042	-0.17055	5.042	-0.0238	5.04183	-0.17025	5.04167	-0.00255
5.05017	-0.00575	5.05033	-0.16975	5.05033	-0.0216	5.05017	-0.16965	5.05	-0.00185
5.0585	-0.0053	5.05867	-0.17045	5.05867	-0.02115	5.0585	-0.16925	5.05833	-0.0012
5.06683	-0.0059	5.067	-0.1702	5.067	-0.0206	5.06683	-0.171	5.06667	-0.0007
5.07517	-0.0044	5.07533	-0.16995	5.07533	-0.01885	5.07517	-0.16765	5.075	-0.0009
5.0835	-0.00485	5.08367	-0.17	5.08367	-0.01995	5.0835	-0.16785	5.08333	-0.00095
5.09183	-0.00535	5.092	-0.1705	5.092	-0.0218	5.09183	-0.16795	5.09167	-0.00105
5.10017	-0.0062	5.10033	-0.17105	5.10033	-0.0226	5.10017	-0.16605	5.1	-0.0005
5.1085	-0.00625	5.10867	-0.17235	5.10867	-0.022	5.1085	-0.16775	5.10833	0.0011
5.11683	-0.00575	5.117	-0.1713	5.117	-0.02165	5.11683	-0.16435	5.11667	0.00285
5.12517	-0.0054	5.12533	-0.17115	5.12533	-0.01965	5.12517	-0.1613	5.125	0.003
5.1335	-0.00405	5.13367	-0.17005	5.13367	-0.019	5.1335	-0.15795	5.13333	0.00625
5.14183	-0.0038	5.142	-0.1702	5.142	-0.01825	5.14183	-0.1581	5.14167	0.0079
5.15017	-0.0048	5.15033	-0.16965	5.15033	-0.01795	5.15017	-0.15765	5.15	0.0087
5.1585	-0.0037	5.15867	-0.17045	5.15867	-0.01785	5.1585	-0.15535	5.15833	0.0106
5.16683	-0.00545	5.167	-0.17005	5.167	-0.01755	5.16683	-0.1553	5.16667	0.00995
5.17517	-0.00485	5.17533	-0.16955	5.17533	-0.01655	5.17517	-0.15465	5.175	0.01195
5.1835	-0.00405	5.18367	-0.1701	5.18367	-0.0145	5.1835	-0.1539	5.18333	0.0131
5.19183	-0.00225	5.192	-0.16885	5.192	-0.0107	5.19183	-0.1523	5.19167	0.01405
5.20017	-0.00245	5.20033	-0.16855	5.20033	-0.00875	5.20017	-0.1529	5.2	0.016
5.2085	-0.00025	5.20867	-0.1665	5.20867	-0.00515	5.2085	-0.1522	5.20833	0.0187
5.21683	-0.0018	5.217	-0.16625	5.217	-0.0001	5.21683	-0.15205	5.21667	0.01935
5.22517	-0.0004	5.22533	-0.16485	5.22533	0.0049	5.22517	-0.15265	5.225	0.0196
5.2335	0.00185	5.23367	-0.16355	5.23367	0.0121	5.2335	-0.15015	5.23333	0.0198
5.24183	0.0053	5.242	-0.1614	5.242	0.01975	5.24183	-0.14965	5.24167	0.0241
5.25017	0.0059	5.25033	-0.16035	5.25033	0.0265	5.25017	-0.14915	5.25	0.02365
5.2585	0.0046	5.25867	-0.15985	5.25867	0.0317	5.2585	-0.15045	5.25833	0.0226
5.26683	0.0063	5.267	-0.1608	5.267	0.03655	5.26683	-0.14995	5.26667	0.0248
5.27517	0.0058	5.27533	-0.15935	5.27533	0.03825	5.27517	-0.14975	5.275	0.0248
5.2835	0.0054	5.28367	-0.162	5.28367	0.0389	5.2835	-0.1503	5.28333	0.02515
5.29183	0.00325	5.292	-0.1652	5.292	0.03725	5.29183	-0.15185	5.29167	0.0248
5.30017	0.00175	5.30033	-0.1668	5.30033	0.03385	5.30017	-0.15325	5.3	0.0258
5.3085	0.0011	5.30867	-0.1671	5.30867	0.03215	5.3085	-0.15375	5.30833	0.02675
5.31683	0.0004	5.317	-0.1684	5.317	0.02555	5.31683	-0.15425	5.31667	0.02745
5.32517	-0.0004	5.32533	-0.1693	5.32533	0.02165	5.32517	-0.15795	5.325	0.02725
5.3335	0.00145	5.33367	-0.16785	5.33367	0.0179	5.3335	-0.1575	5.33333	0.02825
5.34183	0.00195	5.342	-0.16835	5.342	0.0132	5.34183	-0.15845	5.34167	0.0263
5.35017	0.00235	5.35033	-0.1661	5.35033	0.0096	5.35017	-0.15785	5.35	0.02835
5.3585	0.004	5.35867	-0.16435	5.35867	0.00925	5.3585	-0.15495	5.35833	0.0298
5.36683	0.00575	5.367	-0.1632	5.367	0.00755	5.36683	-0.154	5.36667	0.02905
5.37517	0.0087	5.37533	-0.1618	5.37533	0.00795	5.37517	-0.1508	5.375	0.02955
5.3835	0.0104	5.38367	-0.15845	5.38367	0.0085	5.3835	-0.1488	5.38333	0.03025
5.39183	0.01245	5.392	-0.15735	5.392	0.00575	5.39183	-0.1472	5.39167	0.0323
5.40017	0.01445	5.40033	-0.15595	5.40033	0.006	5.40017	-0.14405	5.4	0.0331
5.4085	0.0165	5.40867	-0.1543	5.40867	0.0064	5.4085	-0.1426	5.40833	0.0336
5.41683	0.01845	5.417	-0.1522	5.417	0.0078	5.41683	-0.13905	5.41667	0.0343
5.42517	0.021	5.42533	-0.15025	5.42533	0.0091	5.42517	-0.13525	5.425	0.0375
5.4335	0.02145	5.43367	-0.1502	5.43367	0.0097	5.4335	-0.13385	5.43333	0.0384
5.44183	0.02115	5.442	-0.1501	5.442	0.01025	5.44183	-0.1313	5.44167	0.03975
5.45017	0.02295	5.45033	-0.14845	5.45033	0.01055	5.45017	-0.12915	5.45	0.0407
5.4585	0.0223	5.45867	-0.14795	5.45867	0.01175	5.4585	-0.12745	5.45833	0.04355
5.46683	0.02245	5.467	-0.14875	5.467	0.01065	5.46683	-0.12565	5.46667	0.0453
5.47517	0.02355	5.47533	-0.1488	5.47533	0.01105	5.47517	-0.12345	5.475	0.0476
5.4835	0.0236	5.48367	-0.1474	5.48367	0.01365	5.4835	-0.1208	5.48333	0.05205
5.49183	0.0244	5.492	-0.148	5.492	0.0148	5.49183	-0.12025	5.49167	0.05445
5.50017	0.0256	5.50033	-0.1465	5.50033	0.01705	5.50017	-0.1197	5.5	0.0568
5.5085	0.0236	5.50867	-0.1469	5.50867	0.01865	5.5085	-0.1199	5.50833	0.05725
5.51683	0.0245	5.517	-0.14585	5.517	0.0221	5.51683	-0.11965	5.51667	0.0583
5.52517	0.02645	5.52533	-0.145	5.52533	0.02405	5.52517	-0.11945	5.525	0.06145
5.5335	0.0255	5.53367	-0.14645	5.53367	0.0269	5.5335	-0.12135	5.53333	0.06255
5.54183	0.02695	5.542	-0.14375	5.542	0.03095	5.54183	-0.1205	5.54167	0.0657
5.55017	0.0292	5.55033	-0.1419	5.55033	0.0349	5.55017	-0.1202	5.55	0.06925
5.5585	0.0288	5.55867	-0.14085	5.55867	0.039	5.5585	-0.11985	5.55833	0.0697
5.56683	0.02985	5.567	-0.14015	5.567	0.04455	5.56683	-0.11945	5.56667	0.07175
5.57517	0.0286	5.57533	-0.14085	5.57533	0.0464	5.57517	-0.1222	5.575	0.0729
5.5835	0.03075	5.58367	-0.14015	5.58367	0.05015	5.5835	-0.12365	5.58333	0.0746
5.59183	0.0328	5.592	-0.13725	5.592	0.05405	5.59183	-0.1233	5.59167	0.076
5.60017	0.03365	5.60033	-0.13825	5.60033	0.05925	5.60017	-0.12315	5.6	0.07845
5.6085	0.03095	5.60867	-0.1387	5.60867	0.06105	5.6085	-0.1248	5.60833	0.0791
5.61683	0.03305	5.617	-0.13695	5.617	0.0656	5.61683	-0.12275	5.61667	0.08415
5.62517	0.03395	5.62533	-0.1356	5.62533	0.069	5.62517	-0.12255	5.625	0.0851
5.6335	0.03655	5.63367	-0.13485	5.63367	0.07115	5.6335	-0.1215	5.63333	0.088
5.64183	0.0344	5.642	-0.1337	5.642	0.0713	5.64183	-0.12225	5.64167	0.08825
5.65017	0.03445	5.65033	-0.1323	5.65033	0.0722	5.65017	-0.1218	5.65	0.09005
5.6585	0.03415	5.65867	-0.13225	5.65867	0.074	5.6585	-0.12035	5.65833	0.09365
5.66683	0.0359	5.667	-0.1298	5.667	0.07675	5.66683	-0.1169	5.66667	0.09465
5.67517	0.03395	5.67533	-0.12865	5.67533	0.0751	5.67517	-0.11555	5.675	0.09575
5.6835	0.03485	5.68367	-0.12475	5.68367	0.07665	5.6835	-0.11285	5.68333	0.0985
5.69183	0.03515	5.692	-0.1222	5.692	0.07805	5.69183	-0.1087	5.69167	0.1003
5.70017	0.0371	5.70033	-0.1161	5.70033	0.08015	5.70017	-0.1053	5.7	0.1039
5.7085	0.0372	5.70867	-0.11095	5.70867	0.0797	5.7085	-0.10255	5.70833	0.10845
5.71683	0.0409	5.717	-0.1037	5.717	0.0821	5.71683	-0.09795	5.71667	0.1124
5.72517	0.0395	5.72533	-0.1025	5.72533	0.07935	5.72517	-0.09715	5.725	0.11445
5.7335	0.0397	5.73367	-0.0987	5.73367	0.0789	5.7335	-0.09405	5.73333	0.1203
5.74183	0.0402	5.742	-0.09425	5.742	0.0775	5.74183	-0.0925	5.74167	0.12455
5.75017	0.0421	5.75033	-0.0889	5.75033	0.0801	5.75017	-0.0897	5.75	0.1299
5.7585	0.0424	5.75867	-0.0877	5.75867	0.07685	5.7585	-0.089	5.75833	0.13285
5.76683	0.0429	5.767	-0.08485	5.767	0.07605	5.76683	-0.08845	5.76667	0.1386
5.77517	0.04535	5.77533	-0.08155	5.77533	0.0747	5.77517	-0.0879	5.775	0.14395
5.7835	0.0461	5.78367	-0.0818	5.78367	0.0757	5.7835	-0.08685	5.78333	0.1479
5.79183	0.0446	5.792	-0.0815	5.792	0.0722	5.79183	-0.0891	5.79167	0.15025
5.80017	0.0444	5.80033	-0.08185	5.80033	0.07085	5.80017	-0.0895	5.8	0.15495
5.8085	0.0466	5.80867	-0.08025	5.80867	0.07235	5.8085	-0.08825	5.80833	0.15735
5.81683	0.04835	5.817	-0.0801	5.817	0.0709	5.81683	-0.0891	5.81667	0.15945
5.82517	0.0487	5.82533	-0.0814	5.82533	0.0712	5.82517	-0.09065	5.825	0.1607
5.8335	0.0499	5.83367	-0.0813	5.83367	0.0719	5.8335	-0.09145	5.83333	0.16415
5.84183	0.04925	5.842	-0.0833	5.842	0.0716	5.84183	-0.0938	5.84167	0.1608
5.85017	0.0506	5.85033	-0.08525	5.85033	0.07285	5.85017	-0.0952	5.85	0.1617
5.8585	0.0503	5.85867	-0.0868	5.85867	0.07455	5.8585	-0.0972	5.85833	0.16175
5.86683	0.0499	5.867	-0.0892	5.867	0.0747	5.86683	-0.099	5.86667	0.15985
5.87517	0.05075	5.87533	-0.09075	5.87533	0.07805	5.87517	-0.0993	5.875	0.1587
5.8835	0.05295	5.88367	-0.0914	5.88367	0.08075	5.8835	-0.0999	5.88333	0.1581
5.89183	0.05365	5.892	-0.0923	5.892	0.08395	5.89183	-0.1012	5.89167	0.1563
5.90017	0.0549	5.90033	-0.0941	5.90033	0.08715	5.90017	-0.10265	5.9	0.1567
5.9085	0.0552	5.90867	-0.096	5.90867	0.08805	5.9085	-0.104	5.90833	0.15535
5.91683	0.05505	5.917	-0.09795	5.917	0.08935	5.91683	-0.10325	5.91667	0.15435
5.92517	0.05535	5.92533	-0.0991	5.92533	0.0915	5.92517	-0.10415	5.925	0.1532
5.9335	0.05705	5.93367	-0.10035	5.93367	0.09305	5.9335	-0.10335	5.93333	0.15235
5.94183	0.057	5.942	-0.1022	5.942	0.0934	5.94183	-0.10625	5.94167	0.1511
5.95017	0.0587	5.95033	-0.1014	5.95033	0.09455	5.95017	-0.10425	5.95	0.15105
5.9585	0.0597	5.95867	-0.10325	5.95867	0.0925	5.9585	-0.10595	5.95833	0.1489
5.96683	0.05945	5.967	-0.10325	5.967	0.09255	5.96683	-0.1079	5.96667	0.1474
5.97517	0.0592	5.97533	-0.10665	5.97533	0.09115	5.97517	-0.10685	5.975	0.1451
5.9835	0.06105	5.98367	-0.10485	5.98367	0.09145	5.9835	-0.1066	5.98333	0.1447
5.99183	0.0617	5.992	-0.1074	5.992	0.09015	5.99183	-0.10735	5.99167	0.1418
6.00017	0.06235	6.00033	-0.1061	6.00033	0.0911	6.00017	-0.10725	6	0.1405
6.0085	0.0639	6.00867	-0.107	6.00867	0.089	6.0085	-0.1071	6.00833	0.13815
6.01683	0.06295	6.017	-0.1054	6.017	0.0875	6.01683	-0.108	6.01667	0.13605
6.02517	0.0626	6.02533	-0.10605	6.02533	0.0862	6.02517	-0.10975	6.025	0.13315
6.0335	0.0627	6.03367	-0.1079	6.03367	0.0825	6.0335	-0.11005	6.03333	0.1292
6.04183	0.0625	6.042	-0.1079	6.042	0.08055	6.04183	-0.1117	6.04167	0.125
6.05017	0.06355	6.05033	-0.10645	6.05033	0.08055	6.05017	-0.1121	6.05	0.1229
6.0585	0.06505	6.05867	-0.1047	6.05867	0.07945	6.0585	-0.11025	6.05833	0.12135
6.06683	0.0665	6.067	-0.10295	6.067	0.07945	6.06683	-0.1091	6.06667	0.119
6.07517	0.06595	6.07533	-0.10255	6.07533	0.07665	6.07517	-0.11035	6.075	0.1163
6.0835	0.0672	6.08367	-0.0991	6.08367	0.07705	6.0835	-0.10875	6.08333	0.1145
6.09183	0.0671	6.092	-0.09845	6.092	0.07685	6.09183	-0.1102	6.09167	0.11155
6.10017	0.06715	6.10033	-0.09755	6.10033	0.07525	6.10017	-0.11035	6.1	0.1098
6.1085	0.0712	6.10867	-0.0937	6.10867	0.07595	6.1085	-0.10585	6.10833	0.1096
6.11683	0.0717	6.117	-0.09245	6.117	0.07535	6.11683	-0.10565	6.11667	0.1089
6.12517	0.0726	6.12533	-0.0906	6.12533	0.07565	6.12517	-0.10315	6.125	0.10935
6.1335	0.07315	6.13367	-0.08995	6.13367	0.0754	6.1335	-0.10245	6.13333	0.10895
6.14183	0.0743	6.142	-0.08645	6.142	0.0756	6.14183	-0.1004	6.14167	0.1109
6.15017	0.0765	6.15033	-0.0865	6.15033	0.0748	6.15017	-0.09805	6.15	0.11265
6.1585	0.0768	6.15867	-0.084	6.15867	0.0764	6.1585	-0.0964	6.15833	0.11385
6.16683	0.0759	6.167	-0.08465	6.167	0.07665	6.16683	-0.0963	6.16667	0.11635
6.17517	0.0786	6.17533	-0.08115	6.17533	0.07955	6.17517	-0.09125	6.175	0.12085
6.1835	0.0782	6.18367	-0.08195	6.18367	0.07965	6.1835	-0.0899	6.18333	0.12405
6.19183	0.07905	6.192	-0.0815	6.192	0.07965	6.19183	-0.0892	6.19167	0.12605
6.20017	0.0804	6.20033	-0.08215	6.20033	0.07965	6.20017	-0.0874	6.2	0.13055
6.2085	0.08105	6.20867	-0.0795	6.20867	0.0805	6.2085	-0.0859	6.20833	0.1339
6.21683	0.07965	6.217	-0.08095	6.217	0.08045	6.21683	-0.0864	6.21667	0.13545
6.22517	0.07955	6.22533	-0.08355	6.22533	0.08025	6.22517	-0.08615	6.225	0.138
6.2335	0.07855	6.23367	-0.0835	6.23367	0.07905	6.2335	-0.08725	6.23333	0.1395
6.24183	0.07865	6.242	-0.08345	6.242	0.0808	6.24183	-0.0877	6.24167	0.1422
6.25017	0.0793	6.25033	-0.0837	6.25033	0.08035	6.25017	-0.0876	6.25	0.14145
6.2585	0.0805	6.25867	-0.08335	6.25867	0.08015	6.2585	-0.0869	6.25833	0.14415
6.26683	0.08065	6.267	-0.0837	6.267	0.0807	6.26683	-0.08685	6.26667	0.14335
6.27517	0.0825	6.27533	-0.0835	6.27533	0.08255	6.27517	-0.0853	6.275	0.1446
6.2835	0.08355	6.28367	-0.0825	6.28367	0.08435	6.2835	-0.08505	6.28333	0.1432
6.29183	0.08615	6.292	-0.0812	6.292	0.08215	6.29183	-0.0824	6.29167	0.14405
6.30017	0.08695	6.30033	-0.07935	6.30033	0.082	6.30017	-0.08395	6.3	0.1418
6.3085	0.091	6.30867	-0.076	6.30867	0.08575	6.3085	-0.07945	6.30833	0.1414
6.31683	0.0964	6.317	-0.07025	6.317	0.08955	6.31683	-0.0791	6.31667	0.13945
6.32517	0.10125	6.32533	-0.06305	6.32533	0.0937	6.32517	-0.077	6.325	0.1397
6.3335	0.1102	6.33367	-0.0536	6.33367	0.09815	6.3335	-0.0731	6.33333	0.1384
6.34183	0.1225	6.342	-0.04205	6.342	0.1079	6.34183	-0.0682	6.34167	0.1391
6.35017	0.1363	6.35033	-0.028	6.35033	0.11635	6.35017	-0.0609	6.35	0.139
6.3585	0.15155	6.35867	-0.01205	6.35867	0.1293	6.3585	-0.0516	6.35833	0.14005
6.36683	0.17265	6.367	0.00365	6.367	0.14355	6.36683	-0.0387	6.36667	0.1433
6.37517	0.18855	6.37533	0.01735	6.37533	0.15805	6.37517	-0.02555	6.375	0.14575
6.3835	0.2054	6.38367	0.02955	6.38367	0.17535	6.3835	-0.00925	6.38333	0.1463
6.39183	0.22125	6.392	0.03785	6.392	0.18935	6.39183	0.00765	6.39167	0.15335
6.40017	0.2351	6.40033	0.0458	6.40033	0.20375	6.40017	0.02495	6.4	0.16235
6.4085	0.24495	6.40867	0.04905	6.40867	0.21395	6.4085	0.0418	6.40833	0.1717
6.41683	0.2503	6.417	0.04765	6.417	0.222	6.41683	0.05385	6.41667	0.18475
6.42517	0.25185	6.42533	0.0466	6.42533	0.2257	6.42517	0.0657	6.425	0.2008
6.4335	0.2528	6.43367	0.04155	6.43367	0.2272	6.4335	0.0711	6.43333	0.2169
6.44183	0.24765	6.442	0.0362	6.442	0.2267	6.44183	0.07785	6.44167	0.23715
6.45017	0.24035	6.45033	0.02675	6.45033	0.22005	6.45017	0.07515	6.45	0.2531
6.4585	0.23485	6.45867	0.0208	6.45867	0.2149	6.4585	0.0732	6.45833	0.2697
6.46683	0.22775	6.467	0.01235	6.467	0.2094	6.46683	0.068	6.46667	0.2847
6.47517	0.2205	6.47533	0.00505	6.47533	0.20255	6.47517	0.06125	6.475	0.29685
6.4835	0.2093	6.48367	-0.0042	6.48367	0.1933	6.4835	0.0498	6.48333	0.3047
6.49183	0.20335	6.492	-0.0083	6.492	0.18805	6.49183	0.0432	6.49167	0.31155
6.50017	0.1935	6.50033	-0.0155	6.50033	0.18205	6.50017	0.0328	6.5	0.3107
6.5085	0.1867	6.50867	-0.02135	6.50867	0.1799	6.5085	0.0248	6.50833	0.31025
6.51683	0.17805	6.517	-0.0271	6.517	0.17395	6.51683	0.01415	6.51667	0.30705
6.52517	0.17245	6.52533	-0.03005	6.52533	0.1716	6.52517	0.00805	6.525	0.301
6.5335	0.1661	6.53367	-0.03505	6.53367	0.1704	6.5335	0.0023	6.53333	0.29425
6.54183	0.15615	6.542	-0.04295	6.542	0.1676	6.54183	-0.00775	6.54167	0.28305
6.55017	0.1494	6.55033	-0.04845	6.55033	0.1662	6.55017	-0.01485	6.55	0.2733
6.5585	0.1417	6.55867	-0.05135	6.55867	0.1656	6.5585	-0.0219	6.55833	0.2649
6.56683	0.13465	6.567	-0.05635	6.567	0.16465	6.56683	-0.03035	6.56667	0.25335
6.57517	0.1247	6.57533	-0.06285	6.57533	0.1642	6.57517	-0.0396	6.575	0.24345
6.5835	0.1159	6.58367	-0.06755	6.58367	0.161	6.5835	-0.0501	6.58333	0.23455
6.59183	0.1059	6.592	-0.0749	6.592	0.1582	6.59183	-0.06115	6.59167	0.2237
6.60017	0.10085	6.60033	-0.0788	6.60033	0.15755	6.60017	-0.06685	6.6	0.219
6.6085	0.0944	6.60867	-0.08165	6.60867	0.157	6.6085	-0.0759	6.60833	0.214
6.61683	0.0911	6.617	-0.0821	6.617	0.15775	6.61683	-0.0799	6.61667	0.21105
6.62517	0.08985	6.62533	-0.0844	6.62533	0.158	6.62517	-0.0852	6.625	0.20895
6.6335	0.09055	6.63367	-0.08185	6.63367	0.15995	6.6335	-0.0863	6.63333	0.21095
6.64183	0.09035	6.642	-0.082	6.642	0.1605	6.64183	-0.0898	6.64167	0.2108
6.65017	0.09295	6.65033	-0.0776	6.65033	0.16165	6.65017	-0.08835	6.65	0.21385
6.6585	0.0946	6.65867	-0.07635	6.65867	0.16125	6.6585	-0.087	6.65833	0.2161
6.66683	0.09745	6.667	-0.0748	6.667	0.1627	6.66683	-0.08655	6.66667	0.21955
6.67517	0.0988	6.67533	-0.07075	6.67533	0.16235	6.67517	-0.0844	6.675	0.22185
6.6835	0.10155	6.68367	-0.0685	6.68367	0.16185	6.6835	-0.08	6.68333	0.2249
6.69183	0.1062	6.692	-0.0668	6.692	0.16135	6.69183	-0.07865	6.69167	0.2268
6.70017	0.1084	6.70033	-0.06385	6.70033	0.16	6.70017	-0.0767	6.7	0.2284
6.7085	0.11035	6.70867	-0.06015	6.70867	0.15725	6.7085	-0.0753	6.70833	0.22915
6.71683	0.1138	6.717	-0.05775	6.717	0.15395	6.71683	-0.0738	6.71667	0.22735
6.72517	0.1159	6.72533	-0.0567	6.72533	0.15015	6.72517	-0.07425	6.725	0.2233
6.7335	0.1142	6.73367	-0.05515	6.73367	0.14595	6.7335	-0.0744	6.73333	0.2176
6.74183	0.1183	6.742	-0.05175	6.742	0.1434	6.74183	-0.0713	6.74167	0.21445
6.75017	0.1194	6.75033	-0.0472	6.75033	0.1391	6.75017	-0.0694	6.75	0.20825
6.7585	0.11905	6.75867	-0.04435	6.75867	0.13535	6.7585	-0.0685	6.75833	0.2024
6.76683	0.1206	6.767	-0.03995	6.767	0.13065	6.76683	-0.0658	6.76667	0.1958
6.77517	0.1212	6.77533	-0.03535	6.77533	0.1274	6.77517	-0.06585	6.775	0.1884
6.7835	0.1198	6.78367	-0.03215	6.78367	0.123	6.7835	-0.06475	6.78333	0.1826
6.79183	0.1191	6.792	-0.0281	6.792	0.1173	6.79183	-0.0646	6.79167	0.1763
6.80017	0.11955	6.80033	-0.0233	6.80033	0.1148	6.80017	-0.06165	6.8	0.1718
6.8085	0.121	6.80867	-0.0178	6.80867	0.11265	6.8085	-0.0595	6.80833	0.16825
6.81683	0.12005	6.817	-0.01605	6.817	0.11005	6.81683	-0.05885	6.81667	0.1657
6.82517	0.11895	6.82533	-0.01355	6.82533	0.1071	6.82517	-0.05955	6.825	0.1678
6.8335	0.1186	6.83367	-0.0124	6.83367	0.10415	6.8335	-0.0601	6.83333	0.16855
6.84183	0.11835	6.842	-0.01225	6.842	0.1031	6.84183	-0.0626	6.84167	0.1717
6.85017	0.1194	6.85033	-0.01035	6.85033	0.10275	6.85017	-0.06145	6.85	0.18025
6.8585	0.11845	6.85867	-0.01	6.85867	0.10295	6.8585	-0.0629	6.85833	0.1873
6.86683	0.1199	6.867	-0.01005	6.867	0.10345	6.86683	-0.0618	6.86667	0.1954
6.87517	0.1224	6.87533	-0.0099	6.87533	0.1073	6.87517	-0.0611	6.875	0.2051
6.8835	0.12355	6.88367	-0.01	6.88367	0.11095	6.8835	-0.06225	6.88333	0.21355
6.89183	0.125	6.892	-0.01105	6.892	0.11225	6.89183	-0.0627	6.89167	0.2214
6.90017	0.1269	6.90033	-0.01185	6.90033	0.1141	6.90017	-0.0635	6.9	0.2306
6.9085	0.1287	6.90867	-0.01255	6.90867	0.1156	6.9085	-0.0634	6.90833	0.2365
6.91683	0.1309	6.917	-0.01465	6.917	0.11985	6.91683	-0.06265	6.91667	0.2422
6.92517	0.1331	6.92533	-0.0153	6.92533	0.1232	6.92517	-0.05845	6.925	0.24495
6.9335	0.13555	6.93367	-0.01605	6.93367	0.1255	6.9335	-0.0621	6.93333	0.2491
6.94183	0.1357	6.942	-0.0194	6.942	0.12735	6.94183	-0.0631	6.94167	0.2482
6.95017	0.1383	6.95033	-0.01925	6.95033	0.1306	6.95017	-0.06015	6.95	0.2475
6.9585	0.1401	6.95867	-0.01915	6.95867	0.13305	6.9585	-0.05885	6.95833	0.2454
6.96683	0.1397	6.967	-0.02295	6.967	0.13395	6.96683	-0.06	6.96667	0.24125
6.97517	0.14005	6.97533	-0.02555	6.97533	0.1347	6.97517	-0.0596	6.975	0.2392
6.9835	0.14175	6.98367	-0.0274	6.98367	0.1362	6.9835	-0.0589	6.98333	0.2352
6.99183	0.14115	6.992	-0.0293	6.992	0.1353	6.99183	-0.05915	6.99167	0.22945
7.00017	0.14265	7.00033	-0.0317	7.00033	0.13575	7.00017	-0.05805	7	0.2259
7.0085	0.14335	7.00867	-0.03035	7.00867	0.1382	7.0085	-0.05745	7.00833	0.22135
7.01683	0.142	7.017	-0.03335	7.017	0.13625	7.01683	-0.0584	7.01667	0.2148
7.02517	0.14205	7.02533	-0.03375	7.02533	0.1373	7.02517	-0.0581	7.025	0.2108
7.0335	0.1433	7.03367	-0.03455	7.03367	0.1368	7.0335	-0.05865	7.03333	0.2064
7.04183	0.1445	7.042	-0.0333	7.042	0.13895	7.04183	-0.05575	7.04167	0.20355
7.05017	0.1444	7.05033	-0.03515	7.05033	0.13905	7.05017	-0.05745	7.05	0.1982
7.0585	0.145	7.05867	-0.03475	7.05867	0.1384	7.0585	-0.0556	7.05833	0.194
7.06683	0.14515	7.067	-0.03655	7.067	0.1394	7.06683	-0.0554	7.06667	0.18995
7.07517	0.14745	7.07533	-0.0358	7.07533	0.1408	7.07517	-0.0545	7.075	0.1889
7.0835	0.14775	7.08367	-0.0339	7.08367	0.1406	7.0835	-0.0542	7.08333	0.18595
7.09183	0.15065	7.092	-0.0325	7.092	0.1422	7.09183	-0.05325	7.09167	0.18405
7.10017	0.15105	7.10033	-0.0334	7.10033	0.14295	7.10017	-0.05395	7.1	0.18075
7.1085	0.1516	7.10867	-0.0336	7.10867	0.14315	7.1085	-0.0534	7.10833	0.1789
7.11683	0.15265	7.117	-0.03315	7.117	0.1438	7.11683	-0.0531	7.11667	0.1785
7.12517	0.1531	7.12533	-0.03465	7.12533	0.1453	7.12517	-0.05205	7.125	0.17845
7.1335	0.1525	7.13367	-0.0343	7.13367	0.14485	7.1335	-0.0534	7.13333	0.17505
7.14183	0.15355	7.142	-0.03245	7.142	0.1447	7.14183	-0.0513	7.14167	0.1752
7.15017	0.15335	7.15033	-0.0316	7.15033	0.1445	7.15017	-0.05135	7.15	0.1743
7.1585	0.15185	7.15867	-0.0312	7.15867	0.146	7.1585	-0.0519	7.15833	0.17435
7.16683	0.15165	7.167	-0.0347	7.167	0.14275	7.16683	-0.0526	7.16667	0.17305
7.17517	0.15005	7.17533	-0.03325	7.17533	0.14275	7.17517	-0.05245	7.175	0.1719
7.1835	0.151	7.18367	-0.0334	7.18367	0.1439	7.1835	-0.05165	7.18333	0.17385
7.19183	0.14905	7.192	-0.035	7.192	0.14475	7.19183	-0.0519	7.19167	0.1715
7.20017	0.1503	7.20033	-0.0337	7.20033	0.14285	7.20017	-0.05145	7.2	0.1719
7.2085	0.14925	7.20867	-0.034	7.20867	0.1421	7.2085	-0.0553	7.20833	0.1694
7.21683	0.1514	7.217	-0.03225	7.217	0.1439	7.21683	-0.05265	7.21667	0.17025
7.22517	0.1501	7.22533	-0.03445	7.22533	0.1433	7.22517	-0.05375	7.225	0.16915
7.2335	0.1501	7.23367	-0.03195	7.23367	0.1431	7.2335	-0.05305	7.23333	0.16935
7.24183	0.1496	7.242	-0.0338	7.242	0.14285	7.24183	-0.0534	7.24167	0.169
7.25017	0.1495	7.25033	-0.0338	7.25033	0.142	7.25017	-0.0537	7.25	0.1657
7.2585	0.1509	7.25867	-0.03285	7.25867	0.145	7.2585	-0.0517	7.25833	0.16625
7.26683	0.15045	7.267	-0.0326	7.267	0.14295	7.26683	-0.05305	7.26667	0.16575
7.27517	0.153	7.27533	-0.03155	7.27533	0.1444	7.27517	-0.0523	7.275	0.16655
7.2835	0.15295	7.28367	-0.0314	7.28367	0.14405	7.2835	-0.0524	7.28333	0.16495
7.29183	0.1529	7.292	-0.0322	7.292	0.14475	7.29183	-0.0523	7.29167	0.1636
7.30017	0.15545	7.30033	-0.0319	7.30033	0.14525	7.30017	-0.0518	7.3	0.1643
7.3085	0.15735	7.30867	-0.0308	7.30867	0.14595	7.3085	-0.0493	7.30833	0.1664
7.31683	0.15955	7.317	-0.02905	7.317	0.1479	7.31683	-0.04825	7.31667	0.16455
7.32517	0.1629	7.32533	-0.0297	7.32533	0.14735	7.32517	-0.048	7.325	0.16525
7.3335	0.1654	7.33367	-0.0292	7.33367	0.1472	7.3335	-0.04745	7.33333	0.16505
7.34183	0.16995	7.342	-0.0288	7.342	0.1463	7.34183	-0.04605	7.34167	0.1648
7.35017	0.1755	7.35033	-0.02905	7.35033	0.1486	7.35017	-0.045	7.35	0.1661
7.3585	0.1829	7.35867	-0.0282	7.35867	0.14765	7.3585	-0.04315	7.35833	0.16735
7.36683	0.18825	7.367	-0.0267	7.367	0.1483	7.36683	-0.04175	7.36667	0.1685
7.37517	0.1982	7.37533	-0.0252	7.37533	0.1489	7.37517	-0.0363	7.375	0.1705
7.3835	0.2055	7.38367	-0.02595	7.38367	0.14945	7.3835	-0.0335	7.38333	0.17105
7.39183	0.2158	7.392	-0.02295	7.392	0.15135	7.39183	-0.0283	7.39167	0.17505
7.40017	0.2266	7.40033	-0.0217	7.40033	0.15215	7.40017	-0.02255	7.4	0.1772
7.4085	0.2358	7.40867	-0.0215	7.40867	0.154	7.4085	-0.01575	7.40833	0.1819
7.41683	0.24245	7.417	-0.0193	7.417	0.15525	7.41683	-0.0074	7.41667	0.1889
7.42517	0.24765	7.42533	-0.0191	7.42533	0.1555	7.42517	-5e-05	7.425	0.19465
7.4335	0.25315	7.43367	-0.01935	7.43367	0.15415	7.4335	0.007	7.43333	0.2008
7.44183	0.2584	7.442	-0.0168	7.442	0.1576	7.44183	0.01845	7.44167	0.21245
7.45017	0.26035	7.45033	-0.01685	7.45033	0.15745	7.45017	0.02485	7.45	0.22175
7.4585	0.25805	7.45867	-0.01865	7.45867	0.1558	7.4585	0.0309	7.45833	0.23125
7.46683	0.2581	7.467	-0.0175	7.467	0.15745	7.46683	0.03895	7.46667	0.24355
7.47517	0.2538	7.47533	-0.01925	7.47533	0.15635	7.47517	0.04515	7.475	0.25505
7.4835	0.2505	7.48367	-0.01915	7.48367	0.15815	7.4835	0.04955	7.48333	0.26995
7.49183	0.24455	7.492	-0.0205	7.492	0.158	7.49183	0.0513	7.49167	0.28405
7.50017	0.23915	7.50033	-0.01925	7.50033	0.1591	7.50017	0.05385	7.5	0.29655
7.5085	0.2342	7.50867	-0.01945	7.50867	0.16005	7.5085	0.0566	7.50833	0.30835
7.51683	0.2267	7.517	-0.01995	7.517	0.1594	7.51683	0.0557	7.51667	0.31875
7.52517	0.2194	7.52533	-0.02085	7.52533	0.15915	7.52517	0.0525	7.525	0.3268
7.5335	0.2141	7.53367	-0.02255	7.53367	0.16065	7.5335	0.0502	7.53333	0.3329
7.54183	0.207	7.542	-0.0247	7.542	0.1604	7.54183	0.04505	7.54167	0.3357
7.55017	0.20245	7.55033	-0.023	7.55033	0.16405	7.55017	0.0407	7.55	0.3403
7.5585	0.1976	7.55867	-0.0223	7.55867	0.16645	7.5585	0.03555	7.55833	0.3395
7.56683	0.1955	7.567	-0.0223	7.567	0.1689	7.56683	0.03155	7.56667	0.33975
7.57517	0.1902	7.57533	-0.0219	7.57533	0.17035	7.57517	0.0241	7.575	0.33505
7.5835	0.18865	7.58367	-0.021	7.58367	0.176	7.5835	0.01695	7.58333	0.33205
7.59183	0.18795	7.592	-0.0193	7.592	0.18245	7.59183	0.01445	7.59167	0.328
7.60017	0.1839	7.60033	-0.01945	7.60033	0.18445	7.60017	0.00765	7.6	0.31905
7.6085	0.1825	7.60867	-0.01915	7.60867	0.1898	7.6085	0.00285	7.60833	0.313
7.61683	0.18165	7.617	-0.01825	7.617	0.19675	7.61683	-0.00055	7.61667	0.3042
7.62517	0.1801	7.62533	-0.0181	7.62533	0.2007	7.62517	-0.00565	7.625	0.29585
7.6335	0.17955	7.63367	-0.01745	7.63367	0.2073	7.6335	-0.0079	7.63333	0.29015
7.64183	0.1811	7.642	-0.0169	7.642	0.213	7.64183	-0.0101	7.64167	0.28325
7.65017	0.18015	7.65033	-0.01755	7.65033	0.2175	7.65017	-0.0133	7.65	0.2757
7.6585	0.1805	7.65867	-0.01705	7.65867	0.2213	7.6585	-0.01485	7.65833	0.2718
7.66683	0.17955	7.667	-0.01685	7.667	0.22405	7.66683	-0.0174	7.66667	0.26775
7.67517	0.18055	7.67533	-0.0167	7.67533	0.22645	7.67517	-0.0171	7.675	0.26355
7.6835	0.18025	7.68367	-0.0168	7.68367	0.2277	7.6835	-0.02175	7.68333	0.2615
7.69183	0.18115	7.692	-0.0137	7.692	0.2306	7.69183	-0.02105	7.69167	0.25955
7.70017	0.18	7.70033	-0.0166	7.70033	0.2292	7.70017	-0.02355	7.7	0.25835
7.7085	0.1802	7.70867	-0.01495	7.70867	0.22815	7.7085	-0.02365	7.70833	0.2587
7.71683	0.18095	7.717	-0.0135	7.717	0.22735	7.71683	-0.0237	7.71667	0.25955
7.72517	0.17895	7.72533	-0.0159	7.72533	0.2218	7.72517	-0.0255	7.725	0.25585
7.7335	0.1809	7.73367	-0.01535	7.73367	0.21835	7.7335	-0.0268	7.73333	0.25905
7.74183	0.1812	7.742	-0.0144	7.742	0.2176	7.74183	-0.0253	7.74167	0.25885
7.75017	0.1806	7.75033	-0.0121	7.75033	0.215	7.75017	-0.0248	7.75	0.25785
7.7585	0.1822	7.75867	-0.01125	7.75867	0.2117	7.7585	-0.02375	7.75833	0.25825
7.76683	0.1838	7.767	-0.00965	7.767	0.20935	7.76683	-0.02575	7.76667	0.25735
7.77517	0.18445	7.77533	-0.0079	7.77533	0.20575	7.77517	-0.0249	7.775	0.25615
7.7835	0.1854	7.78367	-0.00635	7.78367	0.20465	7.7835	-0.02455	7.78333	0.2532
7.79183	0.1852	7.792	-0.00465	7.792	0.20105	7.79183	-0.02315	7.79167	0.25055
7.80017	0.18695	7.80033	-0.0019	7.80033	0.19875	7.80017	-0.0222	7.8	0.2488
7.8085	0.18865	7.80867	0.0016	7.80867	0.1974	7.8085	-0.0207	7.80833	0.2462
7.81683	0.1894	7.817	0.00645	7.817	0.1961	7.81683	-0.0201	7.81667	0.24265
7.82517	0.18705	7.82533	0.00955	7.82533	0.19335	7.82517	-0.02175	7.825	0.23715
7.8335	0.18825	7.83367	0.01225	7.83367	0.1903	7.8335	-0.021	7.83333	0.2336
7.84183	0.19	7.842	0.01935	7.842	0.19185	7.84183	-0.02015	7.84167	0.2332
7.85017	0.1871	7.85033	0.0229	7.85033	0.18895	7.85017	-0.01955	7.85	0.22875
7.8585	0.18655	7.85867	0.0295	7.85867	0.1874	7.8585	-0.02045	7.85833	0.22805
7.86683	0.18895	7.867	0.03735	7.867	0.18935	7.86683	-0.0174	7.86667	0.2286
7.87517	0.1893	7.87533	0.043	7.87533	0.1888	7.87517	-0.01875	7.875	0.2266
7.8835	0.18965	7.88367	0.04885	7.88367	0.18785	7.8835	-0.0175	7.88333	0.2256
7.89183	0.18895	7.892	0.0545	7.892	0.187	7.89183	-0.01795	7.89167	0.2255
7.90017	0.1883	7.90033	0.05825	7.90033	0.18575	7.90017	-0.0183	7.9	0.2252
7.9085	0.18595	7.90867	0.05975	7.90867	0.18445	7.9085	-0.01945	7.90833	0.2243
7.91683	0.1877	7.917	0.06215	7.917	0.18555	7.91683	-0.0196	7.91667	0.22655
7.92517	0.187	7.92533	0.06335	7.92533	0.18415	7.92517	-0.0219	7.925	0.22815
7.9335	0.18695	7.93367	0.0638	7.93367	0.1846	7.9335	-0.01965	7.93333	0.2312
7.94183	0.187	7.942	0.0631	7.942	0.1856	7.94183	-0.01965	7.94167	0.235
7.95017	0.1892	7.95033	0.0608	7.95033	0.18665	7.95017	-0.01865	7.95	0.23995
7.9585	0.18795	7.95867	0.059	7.95867	0.1844	7.9585	-0.02035	7.95833	0.2431
7.96683	0.1898	7.967	0.05535	7.967	0.1851	7.96683	-0.0209	7.96667	0.24855
7.97517	0.19045	7.97533	0.0528	7.97533	0.18585	7.97517	-0.0205	7.975	0.2535
7.9835	0.1947	7.98367	0.0508	7.98367	0.18905	7.9835	-0.01845	7.98333	0.2604
7.99183	0.1955	7.992	0.0473	7.992	0.18965	7.99183	-0.01765	7.99167	0.26435
8.00017	0.19865	8.00033	0.04585	8.00033	0.1913	8.00017	-0.0163	8	0.26955
8.0085	0.20205	8.00867	0.04435	8.00867	0.19555	8.0085	-0.0131	8.00833	0.2745
8.01683	0.2038	8.017	0.0431	8.017	0.1954	8.01683	-0.0114	8.01667	0.27695
8.02517	0.2075	8.02533	0.04085	8.02533	0.1974	8.02517	-0.00765	8.025	0.27985
8.0335	0.2101	8.03367	0.03775	8.03367	0.2024	8.0335	-0.0081	8.03333	0.28055
8.04183	0.2103	8.042	0.03375	8.042	0.2016	8.04183	-0.0067	8.04167	0.2787
8.05017	0.21205	8.05033	0.03115	8.05033	0.2051	8.05017	-0.00175	8.05	0.27735
8.0585	0.21495	8.05867	0.03015	8.05867	0.20835	8.0585	0.00135	8.05833	0.2784
8.06683	0.2138	8.067	0.0258	8.067	0.2081	8.06683	0.00105	8.06667	0.27355
8.07517	0.2142	8.07533	0.02275	8.07533	0.20875	8.07517	0.00365	8.075	0.27045
8.0835	0.2128	8.08367	0.0201	8.08367	0.20825	8.0835	0.0051	8.08333	0.26775
8.09183	0.21265	8.092	0.01795	8.092	0.2062	8.09183	0.00415	8.09167	0.2645
8.10017	0.21115	8.10033	0.0149	8.10033	0.2068	8.10017	0.00325	8.1	0.26035
8.1085	0.213	8.10867	0.01275	8.10867	0.20585	8.1085	0.00415	8.10833	0.25955
8.11683	0.2135	8.117	0.0125	8.117	0.2054	8.11683	0.0024	8.11667	0.25605
8.12517	0.2124	8.12533	0.00845	8.12533	0.2035	8.12517	0.00215	8.125	0.25135
8.1335	0.2135	8.13367	0.0075	8.13367	0.2016	8.1335	0.00255	8.13333	0.25025
8.14183	0.2152	8.142	0.009	8.142	0.20235	8.14183	0.0008	8.14167	0.2486
8.15017	0.2147	8.15033	0.00785	8.15033	0.2002	8.15017	-0.00175	8.15	0.24375
8.1585	0.21895	8.15867	0.00815	8.15867	0.19955	8.1585	-0.0009	8.15833	0.2429
8.16683	0.21985	8.167	0.00675	8.167	0.19675	8.16683	-0.003	8.16667	0.2401
8.17517	0.22255	8.17533	0.00665	8.17533	0.197	8.17517	-0.00335	8.175	0.23705
8.1835	0.22575	8.18367	0.00625	8.18367	0.197	8.1835	-0.00355	8.18333	0.23435
8.19183	0.2296	8.192	0.0072	8.192	0.19805	8.19183	-0.00235	8.19167	0.23255
8.20017	0.2307	8.20033	0.00635	8.20033	0.19665	8.20017	-0.00295	8.2	0.23035
8.2085	0.23615	8.20867	0.00885	8.20867	0.198	8.2085	-0.00175	8.20833	0.22985
8.21683	0.23835	8.217	0.01125	8.217	0.1985	8.21683	-0.0013	8.21667	0.2305
8.22517	0.2401	8.22533	0.0137	8.22533	0.1981	8.22517	-0.00045	8.225	0.2311
8.2335	0.2416	8.23367	0.0179	8.23367	0.19805	8.2335	-0.0005	8.23333	0.22955
8.24183	0.2468	8.242	0.02425	8.242	0.20255	8.24183	0.00215	8.24167	0.23405
8.25017	0.2496	8.25033	0.03155	8.25033	0.20525	8.25017	0.00245	8.25	0.23535
8.2585	0.2549	8.25867	0.03995	8.25867	0.2094	8.2585	0.00375	8.25833	0.23635
8.26683	0.26285	8.267	0.0503	8.267	0.21655	8.26683	0.00855	8.26667	0.23975
8.27517	0.27175	8.27533	0.06115	8.27533	0.22505	8.27517	0.0137	8.275	0.2434
8.2835	0.2782	8.28367	0.0692	8.28367	0.23265	8.2835	0.01935	8.28333	0.24585
8.29183	0.284	8.292	0.07465	8.292	0.24115	8.29183	0.0266	8.29167	0.2473
8.30017	0.28925	8.30033	0.0785	8.30033	0.25315	8.30017	0.03645	8.3	0.2498
8.3085	0.2942	8.30867	0.08215	8.30867	0.26265	8.3085	0.04875	8.30833	0.2538
8.31683	0.29345	8.317	0.0798	8.317	0.2694	8.31683	0.06175	8.31667	0.2544
8.32517	0.2914	8.32533	0.0776	8.32533	0.2783	8.32517	0.07365	8.325	0.2572
8.3335	0.2871	8.33367	0.07295	8.33367	0.2799	8.3335	0.0817	8.33333	0.2594
8.34183	0.28045	8.342	0.06565	8.342	0.2817	8.34183	0.0892	8.34167	0.2637
8.35017	0.27245	8.35033	0.0582	8.35033	0.2792	8.35017	0.09305	8.35	0.2674
8.3585	0.26225	8.35867	0.05005	8.35867	0.2735	8.3585	0.0931	8.35833	0.27305
8.36683	0.25405	8.367	0.0434	8.367	0.26985	8.36683	0.09295	8.36667	0.2801
8.37517	0.2456	8.37533	0.0357	8.37533	0.26285	8.37517	0.08965	8.375	0.2881
8.3835	0.2365	8.38367	0.0288	8.38367	0.25405	8.3835	0.08185	8.38333	0.29635
8.39183	0.2286	8.392	0.0231	8.392	0.246	8.39183	0.07325	8.39167	0.3033
8.40017	0.22255	8.40033	0.01675	8.40033	0.23715	8.40017	0.0656	8.4	0.30925
8.4085	0.21295	8.40867	0.01025	8.40867	0.22775	8.4085	0.05365	8.40833	0.31095
8.41683	0.2044	8.417	0.0037	8.417	0.2187	8.41683	0.04325	8.41667	0.31145
8.42517	0.19435	8.42533	-0.00525	8.42533	0.2081	8.42517	0.03175	8.425	0.30475
8.4335	0.18615	8.43367	-0.0122	8.43367	0.1996	8.4335	0.02205	8.43333	0.2993
8.44183	0.1753	8.442	-0.0221	8.442	0.18725	8.44183	0.00725	8.44167	0.28415
8.45017	0.1648	8.45033	-0.03195	8.45033	0.1763	8.45017	-0.0058	8.45	0.2687
8.4585	0.15505	8.45867	-0.0426	8.45867	0.1662	8.4585	-0.01795	8.45833	0.2526
8.46683	0.14505	8.467	-0.0514	8.467	0.15525	8.46683	-0.0305	8.46667	0.23585
8.47517	0.13435	8.47533	-0.0628	8.47533	0.1437	8.47517	-0.04195	8.475	0.218
8.4835	0.12445	8.48367	-0.07075	8.48367	0.1364	8.4835	-0.05155	8.48333	0.20385
8.49183	0.1221	8.492	-0.07475	8.492	0.13175	8.49183	-0.05745	8.49167	0.1951
8.50017	0.1183	8.50033	-0.07845	8.50033	0.1283	8.50017	-0.06315	8.5	0.18735
8.5085	0.11745	8.50867	-0.0791	8.50867	0.12775	8.5085	-0.06525	8.50833	0.18295
8.51683	0.12055	8.517	-0.07635	8.517	0.13075	8.51683	-0.0643	8.51667	0.18125
8.52517	0.1267	8.52533	-0.06975	8.52533	0.13595	8.52517	-0.0603	8.525	0.1851
8.5335	0.1313	8.53367	-0.0638	8.53367	0.1425	8.5335	-0.05535	8.53333	0.1874
8.54183	0.13845	8.542	-0.05685	8.542	0.15165	8.54183	-0.0524	8.54167	0.19295
8.55017	0.1452	8.55033	-0.0487	8.55033	0.16005	8.55017	-0.04475	8.55	0.20005
8.5585	0.15405	8.55867	-0.0396	8.55867	0.1684	8.5585	-0.03735	8.55833	0.207
8.56683	0.1627	8.567	-0.0318	8.567	0.1794	8.56683	-0.0296	8.56667	0.2128
8.57517	0.16995	8.57533	-0.0244	8.57533	0.1886	8.57517	-0.0244	8.575	0.21735
8.5835	0.17625	8.58367	-0.018	8.58367	0.1968	8.5835	-0.01835	8.58333	0.2216
8.59183	0.1828	8.592	-0.01325	8.592	0.2026	8.59183	-0.01535	8.59167	0.2255
8.60017	0.1879	8.60033	-0.0076	8.60033	0.2121	8.60017	-0.0105	8.6	0.2304
8.6085	0.19145	8.60867	-0.00365	8.60867	0.219	8.6085	-0.00725	8.60833	0.2322
8.61683	0.1947	8.617	0.00085	8.617	0.22705	8.61683	-0.0043	8.61667	0.2352
8.62517	0.1988	8.62533	0.00585	8.62533	0.23325	8.62517	-0.00225	8.625	0.2381
8.6335	0.20035	8.63367	0.0064	8.63367	0.2369	8.6335	-0.0012	8.63333	0.2375
8.64183	0.20245	8.642	0.0081	8.642	0.24285	8.64183	-0.00075	8.64167	0.24045
8.65017	0.204	8.65033	0.01085	8.65033	0.2471	8.65017	0.002	8.65	0.2424
8.6585	0.20465	8.65867	0.0125	8.65867	0.25025	8.6585	0.00275	8.65833	0.24395
8.66683	0.20505	8.667	0.0128	8.667	0.2541	8.66683	0.00235	8.66667	0.2455
8.67517	0.2074	8.67533	0.01505	8.67533	0.25515	8.67517	0.004	8.675	0.2486
8.6835	0.2069	8.68367	0.01415	8.68367	0.2565	8.6835	0.0035	8.68333	0.2499
8.69183	0.20975	8.692	0.01665	8.692	0.25985	8.69183	0.0049	8.69167	0.2509
8.70017	0.20945	8.70033	0.0168	8.70033	0.25815	8.70017	0.00465	8.7	0.25425
8.7085	0.21125	8.70867	0.0207	8.70867	0.25905	8.7085	0.0059	8.70833	0.25775
8.71683	0.2126	8.717	0.02145	8.717	0.25855	8.71683	0.00535	8.71667	0.25935
8.72517	0.21235	8.72533	0.02135	8.72533	0.25715	8.72517	0.00525	8.725	0.2622
8.7335	0.2129	8.73367	0.02355	8.73367	0.25575	8.7335	0.0049	8.73333	0.26425
8.74183	0.21265	8.742	0.0237	8.742	0.25265	8.74183	0.00615	8.74167	0.2659
8.75017	0.215	8.75033	0.0247	8.75033	0.2522	8.75017	0.00865	8.75	0.26845
8.7585	0.2168	8.75867	0.0263	8.75867	0.25225	8.7585	0.01025	8.75833	0.271
8.76683	0.2179	8.767	0.02515	8.767	0.24905	8.76683	0.01085	8.76667	0.2713
8.77517	0.2199	8.77533	0.02815	8.77533	0.24725	8.77517	0.0127	8.775	0.2723
8.7835	0.21925	8.78367	0.0272	8.78367	0.2448	8.7835	0.01355	8.78333	0.27145
8.79183	0.2185	8.792	0.0272	8.792	0.24205	8.79183	0.0137	8.79167	0.2701
8.80017	0.2188	8.80033	0.02715	8.80033	0.24035	8.80017	0.01515	8.8	0.27045
8.8085	0.21795	8.80867	0.02615	8.80867	0.2388	8.8085	0.0163	8.80833	0.27135
8.81683	0.2197	8.817	0.026	8.817	0.23735	8.81683	0.01575	8.81667	0.271
8.82517	0.21965	8.82533	0.02775	8.82533	0.23555	8.82517	0.01615	8.825	0.2707
8.8335	0.2204	8.83367	0.02965	8.83367	0.23415	8.8335	0.01625	8.83333	0.2717
8.84183	0.2212	8.842	0.0297	8.842	0.23245	8.84183	0.0175	8.84167	0.27215
8.85017	0.22045	8.85033	0.0293	8.85033	0.2305	8.85017	0.01625	8.85	0.2699
8.8585	0.22005	8.85867	0.0309	8.85867	0.22895	8.8585	0.0162	8.85833	0.26995
8.86683	0.22145	8.867	0.0338	8.867	0.22985	8.86683	0.01805	8.86667	0.271
8.87517	0.222	8.87533	0.0343	8.87533	0.2279	8.87517	0.0184	8.875	0.26885
8.8835	0.2225	8.88367	0.0355	8.88367	0.2268	8.8835	0.0191	8.88333	0.2661
8.89183	0.2243	8.892	0.0378	8.892	0.2266	8.89183	0.01795	8.89167	0.2642
8.90017	0.22295	8.90033	0.04025	8.90033	0.2249	8.90017	0.01835	8.9	0.26145
8.9085	0.22395	8.90867	0.0418	8.90867	0.22725	8.9085	0.02015	8.90833	0.25815
8.91683	0.22615	8.917	0.04725	8.917	0.2288	8.91683	0.0213	8.91667	0.25715
8.92517	0.22735	8.92533	0.05205	8.92533	0.22925	8.92517	0.0227	8.925	0.25685
8.9335	0.2281	8.93367	0.05505	8.93367	0.22825	8.9335	0.0232	8.93333	0.2558
8.94183	0.22855	8.942	0.0584	8.942	0.2291	8.94183	0.02505	8.94167	0.25345
8.95017	0.23	8.95033	0.06435	8.95033	0.23155	8.95017	0.02675	8.95	0.25465
8.9585	0.2318	8.95867	0.0657	8.95867	0.2326	8.9585	0.02775	8.95833	0.25445
8.96683	0.2344	8.967	0.0703	8.967	0.2345	8.96683	0.0295	8.96667	0.25535
8.97517	0.23715	8.97533	0.07335	8.97533	0.23545	8.97517	0.03125	8.975	0.2576
8.9835	0.23885	8.98367	0.0774	8.98367	0.2372	8.9835	0.0346	8.98333	0.2569
8.99183	0.24055	8.992	0.08145	8.992	0.23815	8.99183	0.03615	8.99167	0.2598
9.00017	0.2438	9.00033	0.08245	9.00033	0.23895	9.00017	0.03875	9	0.26245
9.0085	0.2467	9.00867	0.0868	9.00867	0.24385	9.0085	0.04145	9.00833	0.2669
9.01683	0.2466	9.017	0.08745	9.017	0.2459	9.01683	0.04255	9.01667	0.2707
9.02517	0.25065	9.02533	0.0896	9.02533	0.2475	9.02517	0.04575	9.025	0.27545
9.0335	0.2541	9.03367	0.0911	9.03367	0.24875	9.0335	0.0474	9.03333	0.28
9.04183	0.25615	9.042	0.0921	9.042	0.2516	9.04183	0.0506	9.04167	0.28565
9.05017	0.25775	9.05033	0.09065	9.05033	0.25355	9.05017	0.0516	9.05	0.29115
9.0585	0.26045	9.05867	0.09025	9.05867	0.2556	9.0585	0.05375	9.05833	0.2977
9.06683	0.26175	9.067	0.0887	9.067	0.2584	9.06683	0.05525	9.06667	0.3021
9.07517	0.2628	9.07533	0.08615	9.07533	0.25985	9.07517	0.0556	9.075	0.30505
9.0835	0.26255	9.08367	0.0851	9.08367	0.26005	9.0835	0.0554	9.08333	0.30965
9.09183	0.26475	9.092	0.0832	9.092	0.2613	9.09183	0.05575	9.09167	0.31315
9.10017	0.2632	9.10033	0.08275	9.10033	0.26275	9.10017	0.05715	9.1	0.31625
9.1085	0.2632	9.10867	0.07925	9.10867	0.2631	9.1085	0.05715	9.10833	0.3189
9.11683	0.2649	9.117	0.07865	9.117	0.2641	9.11683	0.0584	9.11667	0.32055
9.12517	0.2621	9.12533	0.07565	9.12533	0.26345	9.12517	0.0561	9.125	0.3208
9.1335	0.26105	9.13367	0.07485	9.13367	0.2642	9.1335	0.0569	9.13333	0.32215
9.14183	0.25995	9.142	0.07035	9.142	0.2629	9.14183	0.0559	9.14167	0.31935
9.15017	0.2599	9.15033	0.06935	9.15033	0.26155	9.15017	0.05535	9.15	0.31905
9.1585	0.2577	9.15867	0.06575	9.15867	0.26055	9.1585	0.0524	9.15833	0.3142
9.16683	0.2547	9.167	0.06445	9.167	0.25815	9.16683	0.051	9.16667	0.3105
9.17517	0.25615	9.17533	0.0637	9.17533	0.25935	9.17517	0.05305	9.175	0.3099
9.1835	0.25365	9.18367	0.06135	9.18367	0.25705	9.1835	0.0512	9.18333	0.3073
9.19183	0.2523	9.192	0.05865	9.192	0.2562	9.19183	0.04895	9.19167	0.30275
9.20017	0.2523	9.20033	0.0583	9.20033	0.25505	9.20017	0.0475	9.2	0.2991
9.2085	0.2505	9.20867	0.05705	9.20867	0.25265	9.2085	0.0448	9.20833	0.29535
9.21683	0.25055	9.217	0.05835	9.217	0.2538	9.21683	0.0449	9.21667	0.2926
9.22517	0.24935	9.22533	0.0566	9.22533	0.25335	9.22517	0.04505	9.225	0.28875
9.2335	0.24985	9.23367	0.0555	9.23367	0.2516	9.2335	0.0439	9.23333	0.28565
9.24183	0.25155	9.242	0.05565	9.242	0.2529	9.24183	0.0444	9.24167	0.28445
9.25017	0.24985	9.25033	0.0543	9.25033	0.2511	9.25017	0.0431	9.25	0.2801
9.2585	0.2504	9.25867	0.0565	9.25867	0.25245	9.2585	0.0437	9.25833	0.2787
9.26683	0.2506	9.267	0.0581	9.267	0.25255	9.26683	0.04295	9.26667	0.27625
9.27517	0.2506	9.27533	0.05845	9.27533	0.2521	9.27517	0.04465	9.275	0.2755
9.2835	0.2528	9.28367	0.05995	9.28367	0.2539	9.2835	0.04515	9.28333	0.2747
9.29183	0.2531	9.292	0.06065	9.292	0.2543	9.29183	0.04665	9.29167	0.27415
9.30017	0.25255	9.30033	0.0595	9.30033	0.25435	9.30017	0.0455	9.3	0.2732
9.3085	0.25335	9.30867	0.0621	9.30867	0.25555	9.3085	0.047	9.30833	0.2728
9.31683	0.2541	9.317	0.06205	9.317	0.25635	9.31683	0.0482	9.31667	0.2721
9.32517	0.25745	9.32533	0.06425	9.32533	0.2581	9.32517	0.05015	9.325	0.27295
9.3335	0.2586	9.33367	0.06615	9.33367	0.25885	9.3335	0.05345	9.33333	0.27385
9.34183	0.25935	9.342	0.0664	9.342	0.25765	9.34183	0.0508	9.34167	0.2724
9.35017	0.26115	9.35033	0.06875	9.35033	0.26125	9.35017	0.05445	9.35	0.2741
9.3585	0.2616	9.35867	0.06875	9.35867	0.261	9.3585	0.0542	9.35833	0.27335
9.36683	0.2662	9.367	0.07085	9.367	0.26395	9.36683	0.05715	9.36667	0.27535
9.37517	0.2687	9.37533	0.07265	9.37533	0.26585	9.37517	0.0577	9.375	0.2753
9.3835	0.2701	9.38367	0.0756	9.38367	0.2679	9.3835	0.0602	9.38333	0.2762
9.39183	0.27585	9.392	0.08315	9.392	0.26995	9.39183	0.06365	9.39167	0.27745
9.40017	0.2921	9.40033	0.10645	9.40033	0.2706	9.40017	0.06445	9.4	0.2778
9.4085	0.3421	9.40867	0.16605	9.40867	0.2748	9.4085	0.06745	9.40833	0.27845
9.41683	0.44495	9.417	0.26205	9.417	0.27835	9.41683	0.07	9.41667	0.27835
9.42517	0.5469	9.42533	0.3276	9.42533	0.29445	9.42517	0.07575	9.425	0.2802
9.4335	0.581	9.43367	0.3359	9.43367	0.34515	9.4335	0.0955	9.43333	0.28155
9.44183	0.56525	9.442	0.31515	9.442	0.4601	9.44183	0.1613	9.44167	0.28355
9.45017	0.51895	9.45033	0.27295	9.45033	0.6114	9.45017	0.2996	9.45	0.2842
9.4585	0.4419	9.45867	0.21115	9.45867	0.7015	9.4585	0.46865	9.45833	0.2879
9.46683	0.63215	9.467	0.4941	9.467	0.71515	9.46683	0.5564	9.46667	0.2892
9.47517	1.40645	9.47533	1.3329	9.47533	0.68785	9.47517	0.55925	9.475	0.29265
9.4835	2.2973	9.48367	2.2225	9.48367	0.61535	9.4835	0.5123	9.48333	0.29465
9.49183	2.99675	9.492	2.9137	9.492	0.66895	9.49183	0.425	9.49167	0.298
9.50017	3.51095	9.50033	3.4211	9.50033	1.3018	9.50017	0.48895	9.5	0.3031
9.5085	3.88505	9.50867	3.78675	9.50867	2.21955	9.5085	1.14215	9.50833	0.3233
9.51683	4.16865	9.517	4.07065	9.517	2.9754	9.51683	2.049	9.51667	0.39875
9.52517	4.43245	9.52533	4.3387	9.52533	3.5254	9.52517	2.78165	9.525	0.5692
9.5335	4.6835	9.53367	4.58245	9.53367	3.9282	9.5335	3.31715	9.53333	0.83005
9.54183	4.8816	9.542	4.768	9.542	4.2218	9.54183	3.70475	9.54167	1.00995
9.55017	5.02245	9.55033	4.8955	9.55033	4.47795	9.55017	3.99605	9.55	1.06035
9.5585	5.1187	9.55867	4.9824	9.55867	4.7309	9.5585	4.25855	9.55833	1.03055
9.56683	5.18525	9.567	5.04095	9.567	4.9442	9.56683	4.5115	9.56667	0.9501
9.57517	5.23255	9.57533	5.08475	9.57533	5.09665	9.57517	4.7213	9.575	0.94925
9.5835	5.26945	9.58367	5.1193	9.58367	5.20305	9.5835	4.86915	9.58333	1.5259
9.59183	5.30015	9.592	5.147	9.592	5.2757	9.59183	4.97035	9.59167	2.46565
9.60017	5.3239	9.60033	5.16845	9.60033	5.3279	9.60017	5.0408	9.6	3.23785
9.6085	5.3464	9.60867	5.18785	9.60867	5.3681	9.6085	5.0921	9.60833	3.7805
9.61683	5.36505	9.617	5.2037	9.617	5.3987	9.61683	5.1297	9.61667	4.17015
9.62517	5.38295	9.62533	5.2199	9.62533	5.42535	9.62517	5.1629	9.625	4.4602
9.6335	5.39855	9.63367	5.2349	9.63367	5.448	9.6335	5.18915	9.63333	4.7079
9.64183	5.41155	9.642	5.24645	9.642	5.46485	9.64183	5.2091	9.64167	4.95225
9.65017	5.42695	9.65033	5.26	9.65033	5.4841	9.65017	5.2302	9.65	5.1674
9.6585	5.4384	9.65867	5.27425	9.65867	5.50005	9.6585	5.24935	9.65833	5.32325
9.66683	5.44755	9.667	5.2846	9.667	5.5134	9.66683	5.2645	9.66667	5.42715
9.67517	5.457	9.67533	5.29645	9.67533	5.52725	9.67517	5.279	9.675	5.49625
9.6835	5.46745	9.68367	5.3079	9.68367	5.5388	9.6835	5.29255	9.68333	5.5469
9.69183	5.47515	9.692	5.31895	9.692	5.5513	9.69183	5.3064	9.69167	5.5863
9.70017	5.4819	9.70033	5.32765	9.70033	5.56275	9.70017	5.31705	9.7	5.615
9.7085	5.48655	9.70867	5.33345	9.70867	5.57265	9.7085	5.32895	9.70833	5.6389
9.71683	5.4922	9.717	5.3403	9.717	5.5824	9.71683	5.33875	9.71667	5.66245
9.72517	5.494	9.72533	5.34455	9.72533	5.59105	9.72517	5.34655	9.725	5.683
9.7335	5.49215	9.73367	5.3455	9.73367	5.597	9.7335	5.3528	9.73333	5.6979
9.74183	5.4929	9.742	5.34805	9.742	5.6034	9.74183	5.3594	9.74167	5.7137
9.75017	5.4916	9.75033	5.34605	9.75033	5.6075	9.75017	5.3635	9.75	5.72645
9.7585	5.4877	9.75867	5.34465	9.75867	5.6092	9.7585	5.3656	9.75833	5.7373
9.76683	5.48395	9.767	5.3394	9.767	5.60915	9.76683	5.365	9.76667	5.7463
9.77517	5.47945	9.77533	5.33645	9.77533	5.60665	9.77517	5.3649	9.775	5.75225
9.7835	5.47345	9.78367	5.3298	9.78367	5.60295	9.7835	5.36415	9.78333	5.7579
9.79183	5.4673	9.792	5.3224	9.792	5.5991	9.79183	5.3578	9.79167	5.76015
9.80017	5.46145	9.80033	5.31485	9.80033	5.59355	9.80017	5.3525	9.8	5.7635
9.8085	5.4527	9.80867	5.3074	9.80867	5.5869	9.8085	5.34765	9.80833	5.7637
9.81683	5.4473	9.817	5.30075	9.817	5.58205	9.81683	5.34295	9.81667	5.763
9.82517	5.43895	9.82533	5.29115	9.82533	5.5753	9.82517	5.3364	9.825	5.7617
9.8335	5.4308	9.83367	5.2825	9.83367	5.567	9.8335	5.32885	9.83333	5.76075
9.84183	5.424	9.842	5.2731	9.842	5.5593	9.84183	5.3216	9.84167	5.75695
9.85017	5.4158	9.85033	5.265	9.85033	5.55185	9.85017	5.31465	9.85	5.75145
9.8585	5.40665	9.85867	5.25655	9.85867	5.54375	9.8585	5.3074	9.85833	5.74755
9.86683	5.399	9.867	5.2468	9.867	5.5338	9.86683	5.2985	9.86667	5.7421
9.87517	5.39065	9.87533	5.2373	9.87533	5.52555	9.87517	5.2918	9.875	5.7367
9.8835	5.38045	9.88367	5.22725	9.88367	5.51725	9.8835	5.28365	9.88333	5.7307
9.89183	5.3718	9.892	5.218	9.892	5.50705	9.89183	5.27465	9.89167	5.72595
9.90017	5.3637	9.90033	5.2077	9.90033	5.49795	9.90017	5.2656	9.9	5.71985
9.9085	5.35535	9.90867	5.199	9.90867	5.4892	9.9085	5.2591	9.90833	5.71515
9.91683	5.34425	9.917	5.1867	9.917	5.4785	9.91683	5.2492	9.91667	5.70785
9.92517	5.3345	9.92533	5.17565	9.92533	5.468	9.92517	5.23925	9.925	5.70015
9.9335	5.3232	9.93367	5.1647	9.93367	5.4572	9.9335	5.2288	9.93333	5.6944
9.94183	5.31215	9.942	5.15535	9.942	5.44875	9.94183	5.2171	9.94167	5.686
9.95017	5.3015	9.95033	5.14325	9.95033	5.43655	9.95017	5.2083	9.95	5.6774
9.9585	5.2933	9.95867	5.13605	9.95867	5.42665	9.9585	5.19885	9.95833	5.6717
9.96683	5.2811	9.967	5.12535	9.967	5.414	9.96683	5.18845	9.96667	5.6619
9.97517	5.27105	9.97533	5.11325	9.97533	5.403	9.97517	5.1774	9.975	5.6534
9.9835	5.26105	9.98367	5.1032	9.98367	5.39255	9.9835	5.16505	9.98333	5.6452
9.99183	5.24865	9.992	5.09115	9.992	5.3799	9.99183	5.15425	9.99167	5.63535
10.0002	5.2383	10.0003	5.0808	10.0003	5.3694	10.0002	5.14475	10	5.6235
10.0085	5.2293	10.0087	5.07035	10.0087	5.36035	10.0085	5.13445	10.0083	5.6152
10.0168	5.21905	10.017	5.0608	10.017	5.3473	10.0168	5.12305	10.0167	5.6046
10.0252	5.20785	10.0253	5.0507	10.0253	5.3372	10.0252	5.1109	10.025	5.59425
10.0335	5.1989	10.0337	5.0394	10.0337	5.326	10.0335	5.10185	10.0333	5.58365
10.0418	5.1871	10.042	5.02695	10.042	5.31365	10.0418	5.0894	10.0417	5.57065
10.0502	5.17675	10.0503	5.01855	10.0503	5.3033	10.0502	5.08015	10.05	5.5603
10.0585	5.1662	10.0587	5.0086	10.0587	5.29265	10.0585	5.0712	10.0583	5.5494
10.0668	5.15665	10.067	4.99835	10.067	5.28055	10.0668	5.0602	10.0667	5.53855
10.0752	5.14665	10.0753	4.9872	10.0753	5.2707	10.0752	5.05045	10.075	5.5268
10.0835	5.13865	10.0837	4.97795	10.0837	5.25945	10.0835	5.041	10.0833	5.51695
10.0918	5.12695	10.092	4.96625	10.092	5.2482	10.0918	5.03015	10.0917	5.50555
10.1002	5.11555	10.1003	4.9555	10.1003	5.2367	10.1002	5.01945	10.1	5.49455
10.1085	5.1043	10.1087	4.9425	10.1087	5.2252	10.1085	5.00795	10.1083	5.48195
10.1168	5.09265	10.117	4.93235	10.117	5.21385	10.1168	4.9982	10.1167	5.4725
10.1252	5.0836	10.1253	4.92165	10.1253	5.2043	10.1252	4.9891	10.125	5.4624
10.1335	5.07045	10.1337	4.9074	10.1337	5.1914	10.1335	4.97795	10.1333	5.44825
10.1418	5.0603	10.142	4.89745	10.142	5.1817	10.1418	4.96825	10.1417	5.43725
10.1502	5.04835	10.1503	4.8866	10.1503	5.17025	10.1502	4.9561	10.15	5.42645
10.1585	5.03725	10.1587	4.8739	10.1587	5.15685	10.1585	4.94415	10.1583	5.4159
10.1668	5.02315	10.167	4.85905	10.167	5.14475	10.1668	4.93265	10.1667	5.40305
10.1752	5.01145	10.1753	4.848	10.1753	5.1328	10.1752	4.9216	10.175	5.3939
10.1835	4.99895	10.1837	4.8342	10.1837	5.12	10.1835	4.908	10.1833	5.3815
10.1918	4.98585	10.192	4.82115	10.192	5.1077	10.1918	4.8974	10.1917	5.371
10.2002	4.97245	10.2003	4.80775	10.2003	5.0936	10.2002	4.88515	10.2	5.3589
10.2085	4.95925	10.2087	4.79445	10.2087	5.08135	10.2085	4.8721	10.2083	5.34745
10.2168	4.9467	10.217	4.78205	10.217	5.06805	10.2168	4.86015	10.2167	5.33645
10.2252	4.9319	10.2253	4.76685	10.2253	5.0534	10.2252	4.84775	10.225	5.32325
10.2335	4.91845	10.2337	4.75185	10.2337	5.04115	10.2335	4.83515	10.2333	5.3127
10.2418	4.9053	10.242	4.74025	10.242	5.0271	10.2418	4.8225	10.2417	5.30045
10.2502	4.8915	10.2503	4.7244	10.2503	5.01145	10.2502	4.8089	10.25	5.2889
10.2585	4.87695	10.2587	4.70895	10.2587	4.9986	10.2585	4.795	10.2583	5.27815
10.2668	4.8627	10.267	4.69515	10.267	4.9857	10.2668	4.7823	10.2667	5.26635
10.2752	4.84845	10.2753	4.67935	10.2753	4.96945	10.2752	4.7682	10.275	5.25395
10.2835	4.8329	10.2837	4.66345	10.2837	4.95495	10.2835	4.75315	10.2833	5.2407
10.2918	4.817	10.292	4.64785	10.292	4.9384	10.2918	4.7379	10.2917	5.2262
10.3002	4.80335	10.3003	4.6316	10.3003	4.9231	10.3002	4.72465	10.3	5.21545
10.3085	4.7875	10.3087	4.6161	10.3087	4.90975	10.3085	4.7095	10.3083	5.2028
10.3168	4.773	10.317	4.60095	10.317	4.89455	10.3168	4.6947	10.3167	5.18875
10.3252	4.7552	10.3253	4.58395	10.3253	4.87675	10.3252	4.6777	10.325	5.1747
10.3335	4.7375	10.3337	4.56455	10.3337	4.85985	10.3335	4.6613	10.3333	5.1608
10.3418	4.72175	10.342	4.551	10.342	4.8452	10.3418	4.6465	10.3417	5.14765
10.3502	4.7054	10.3503	4.53335	10.3503	4.8281	10.3502	4.6294	10.35	5.135
10.3585	4.6901	10.3587	4.51585	10.3587	4.8106	10.3585	4.6136	10.3583	5.1215
10.3668	4.6741	10.367	4.49945	10.367	4.79405	10.3668	4.59845	10.3667	5.10805
10.3752	4.6553	10.3753	4.4822	10.3753	4.77805	10.3752	4.5804	10.375	5.0909
10.3835	4.63865	10.3837	4.4644	10.3837	4.7618	10.3835	4.5655	10.3833	5.07745
10.3918	4.6194	10.392	4.44655	10.392	4.74185	10.3918	4.54675	10.3917	5.0603
10.4002	4.60245	10.4003	4.42975	10.4003	4.72715	10.4002	4.53035	10.4	5.0462
10.4085	4.58645	10.4087	4.411	10.4087	4.70915	10.4085	4.51255	10.4083	5.0311
10.4168	4.5676	10.417	4.39495	10.417	4.69195	10.4168	4.49665	10.4167	5.01635
10.4252	4.5493	10.4253	4.37465	10.4253	4.67245	10.4252	4.47755	10.425	4.9987
10.4335	4.53015	10.4337	4.35685	10.4337	4.65505	10.4335	4.4611	10.4333	4.98295
10.4418	4.51185	10.442	4.33875	10.442	4.6364	10.4418	4.4433	10.4417	4.96715
10.4502	4.4952	10.4503	4.32085	10.4503	4.6207	10.4502	4.4254	10.45	4.95115
10.4585	4.4766	10.4587	4.30275	10.4587	4.6003	10.4585	4.4066	10.4583	4.9332
10.4668	4.45935	10.467	4.28385	10.467	4.58305	10.4668	4.3895	10.4667	4.9171
10.4752	4.43995	10.4753	4.26545	10.4753	4.56415	10.4752	4.37095	10.475	4.9013
10.4835	4.4194	10.4837	4.2436	10.4837	4.54505	10.4835	4.3517	10.4833	4.88195
10.4918	4.4016	10.492	4.22555	10.492	4.5262	10.4918	4.33405	10.4917	4.86485
10.5002	4.383	10.5003	4.2055	10.5003	4.50725	10.5002	4.31445	10.5	4.8482
10.5085	4.3616	10.5087	4.1862	10.5087	4.489	10.5085	4.2931	10.5083	4.83015
10.5168	4.3433	10.517	4.16685	10.517	4.46995	10.5168	4.27575	10.5167	4.8118
10.5252	4.32295	10.5253	4.1479	10.5253	4.44795	10.5252	4.25525	10.525	4.79225
10.5335	4.3042	10.5337	4.1279	10.5337	4.42895	10.5335	4.2361	10.5333	4.7743
10.5418	4.28275	10.542	4.1056	10.542	4.4088	10.5418	4.21485	10.5417	4.75605
10.5502	4.264	10.5503	4.0862	10.5503	4.3894	10.5502	4.1952	10.55	4.73845
10.5585	4.2434	10.5587	4.0661	10.5587	4.3705	10.5585	4.1747	10.5583	4.71945
10.5668	4.2235	10.567	4.0467	10.567	4.34975	10.5668	4.1563	10.5667	4.70095
10.5752	4.20295	10.5753	4.0279	10.5753	4.3293	10.5752	4.13725	10.575	4.68185
10.5835	4.1823	10.5837	4.0047	10.5837	4.3099	10.5835	4.1155	10.5833	4.6629
10.5918	4.1629	10.592	3.9853	10.592	4.28835	10.5918	4.09555	10.5917	4.64245
10.6002	4.14175	10.6003	3.9638	10.6003	4.26565	10.6002	4.07525	10.6	4.6245
10.6085	4.11955	10.6087	3.9428	10.6087	4.2459	10.6085	4.05455	10.6083	4.6035
10.6168	4.09805	10.617	3.92025	10.617	4.2244	10.6168	4.03415	10.6167	4.5835
10.6252	4.0787	10.6253	3.8993	10.6253	4.2046	10.6252	4.01455	10.625	4.5633
10.6335	4.0589	10.6337	3.87845	10.6337	4.1852	10.6335	3.99475	10.6333	4.54555
10.6418	4.0366	10.642	3.85545	10.642	4.16275	10.6418	3.9729	10.6417	4.52565
10.6502	4.0145	10.6503	3.83295	10.6503	4.1403	10.6502	3.95215	10.65	4.50505
10.6585	3.995	10.6587	3.8123	10.6587	4.11985	10.6585	3.93255	10.6583	4.48605
10.6668	3.9706	10.667	3.7875	10.667	4.0967	10.6668	3.9088	10.6667	4.4634
10.6752	3.94625	10.6753	3.7612	10.6753	4.0729	10.6752	3.88815	10.675	4.44285
10.6835	3.9243	10.6837	3.73765	10.6837	4.05055	10.6835	3.86595	10.6833	4.42455
10.6918	3.8989	10.692	3.71185	10.692	4.02905	10.6918	3.8435	10.6917	4.40235
10.7002	3.87385	10.7003	3.68765	10.7003	4.00415	10.7002	3.8213	10.7	4.38155
10.7085	3.85	10.7087	3.66035	10.7087	3.9806	10.7085	3.79835	10.7083	4.3613
10.7168	3.82365	10.717	3.63515	10.717	3.95515	10.7168	3.7757	10.7167	4.3392
10.7252	3.7974	10.7253	3.60815	10.7253	3.9304	10.7252	3.75125	10.725	4.31795
10.7335	3.76945	10.7337	3.57765	10.7337	3.90385	10.7335	3.7267	10.7333	4.29715
10.7418	3.74215	10.742	3.54945	10.742	3.87645	10.7418	3.70085	10.7417	4.27555
10.7502	3.71465	10.7503	3.52055	10.7503	3.849	10.7502	3.67755	10.75	4.2546
10.7585	3.6854	10.7587	3.4906	10.7587	3.8213	10.7585	3.6511	10.7583	4.23365
10.7668	3.65475	10.767	3.46095	10.767	3.79515	10.7668	3.62515	10.7667	4.21345
10.7752	3.6251	10.7753	3.4302	10.7753	3.76485	10.7752	3.5976	10.775	4.19085
10.7835	3.5949	10.7837	3.3977	10.7837	3.7344	10.7835	3.5691	10.7833	4.16765
10.7918	3.5631	10.792	3.36615	10.792	3.70515	10.7918	3.54035	10.7917	4.14505
10.8002	3.5316	10.8003	3.33285	10.8003	3.67345	10.8002	3.51225	10.8	4.1212
10.8085	3.4967	10.8087	3.2994	10.8087	3.64085	10.8085	3.4809	10.8083	4.09635
10.8168	3.46575	10.817	3.26645	10.817	3.6102	10.8168	3.4538	10.8167	4.07175
10.8252	3.432	10.8253	3.23215	10.8253	3.5769	10.8252	3.42095	10.825	4.04625
10.8335	3.3991	10.8337	3.1966	10.8337	3.5434	10.8335	3.3869	10.8333	4.02145
10.8418	3.3677	10.842	3.16315	10.842	3.51125	10.8418	3.3558	10.8417	3.99445
10.8502	3.33085	10.8503	3.1257	10.8503	3.4736	10.8502	3.3208	10.85	3.96515
10.8585	3.2948	10.8587	3.0893	10.8587	3.4402	10.8585	3.2867	10.8583	3.93645
10.8668	3.26145	10.867	3.0561	10.867	3.40725	10.8668	3.2547	10.8667	3.90885
10.8752	3.2258	10.8753	3.0184	10.8753	3.371	10.8752	3.21925	10.875	3.87765
10.8835	3.19	10.8837	2.98115	10.8837	3.3357	10.8835	3.1828	10.8833	3.8455
10.8918	3.15495	10.892	2.9438	10.892	3.30175	10.8918	3.14825	10.8917	3.8142
10.9002	3.11995	10.9003	2.9095	10.9003	3.26565	10.9002	3.1137	10.9	3.7836
10.9085	3.08285	10.9087	2.87105	10.9087	3.2283	10.9085	3.0765	10.9083	3.75025
10.9168	3.04625	10.917	2.8325	10.917	3.19025	10.9168	3.0396	10.9167	3.7163
10.9252	3.011	10.9253	2.79635	10.9253	3.15465	10.9252	3.0062	10.925	3.68445
10.9335	2.97255	10.9337	2.7589	10.9337	3.11765	10.9335	2.969	10.9333	3.64995
10.9418	2.9371	10.942	2.72295	10.942	3.08005	10.9418	2.9342	10.9417	3.616
10.9502	2.89985	10.9503	2.684	10.9503	3.04335	10.9502	2.8973	10.95	3.57965
10.9585	2.8983	10.9587	2.64845	10.9587	3.008	10.9585	2.85925	10.9583	3.546
10.9668	2.8281	10.967	2.61115	10.967	2.96885	10.9668	2.82345	10.9667	3.51095
10.9752	2.79195	10.9753	2.57365	10.9753	2.93175	10.9752	2.78695	10.975	3.4757
10.9835	2.753	10.9837	2.53465	10.9837	2.8936	10.9835	2.74875	10.9833	3.4393
10.9918	2.7151	10.992	2.4954	10.992	2.855	10.9918	2.71115	10.9917	3.4019
11.0002	2.6775	11.0003	2.4571	11.0003	2.8176	11.0002	2.6749	11	3.36405
11.0085	2.64135	11.0087	2.41805	11.0087	2.78105	11.0085	2.6368	11.0083	3.3292
11.0168	2.60215	11.017	2.378	11.017	2.74275	11.0168	2.5986	11.0167	3.2925
11.0252	2.5653	11.0253	2.3391	11.0253	2.7041	11.0252	2.56115	11.025	3.2543
11.0335	2.5264	11.0337	2.2997	11.0337	2.6657	11.0335	2.52205	11.0333	3.21275
11.0418	2.48665	11.042	2.25965	11.042	2.6267	11.0418	2.48415	11.0417	3.17475
11.0502	2.4477	11.0503	2.2203	11.0503	2.58825	11.0502	2.44485	11.05	3.13915
11.0585	2.40885	11.0587	2.1798	11.0587	2.55065	11.0585	2.40595	11.0583	3.10325
11.0668	2.3704	11.067	2.14095	11.067	2.5123	11.0668	2.36945	11.0667	3.067
11.0752	2.33015	11.0753	2.09905	11.0753	2.47295	11.0752	2.32815	11.075	3.02685
11.0835	2.29135	11.0837	2.0591	11.0837	2.4337	11.0835	2.28765	11.0833	2.9892
11.0918	2.25055	11.092	2.0201	11.092	2.39255	11.0918	2.2469	11.0917	2.95
11.1002	2.2092	11.1003	1.97805	11.1003	2.35085	11.1002	2.2084	11.1	2.91185
11.1085	2.17095	11.1087	1.93735	11.1087	2.3122	11.1085	2.17035	11.1083	2.87435
11.1168	2.12845	11.117	1.8967	11.117	2.2712	11.1168	2.1259	11.1167	2.83415
11.1252	2.08965	11.1253	1.8567	11.1253	2.2319	11.1252	2.088	11.125	2.7966
11.1335	2.04885	11.1337	1.81485	11.1337	2.19035	11.1335	2.0457	11.1333	2.75535
11.1418	2.01105	11.142	1.77715	11.142	2.15045	11.1418	2.00765	11.1417	2.71755
11.1502	1.97035	11.1503	1.73675	11.1503	2.1104	11.1502	1.96735	11.15	2.6773
11.1585	1.9324	11.1587	1.69725	11.1587	2.07	11.1585	1.9265	11.1583	2.63865
11.1668	1.891	11.167	1.65645	11.167	2.02845	11.1668	1.88555	11.1667	2.59695
11.1752	1.8514	11.1753	1.6165	11.1753	1.98775	11.1752	1.84535	11.175	2.5584
11.1835	1.8114	11.1837	1.5765	11.1837	1.94925	11.1835	1.8046	11.1833	2.51715
11.1918	1.7735	11.192	1.53775	11.192	1.90875	11.1918	1.76415	11.1917	2.4769
11.2002	1.73195	11.2003	1.495	11.2003	1.867	11.2002	1.72325	11.2	2.4331
11.2085	1.6949	11.2087	1.45765	11.2087	1.827	11.2085	1.68385	11.2083	2.3936
11.2168	1.6585	11.217	1.41855	11.217	1.7884	11.2168	1.6443	11.2167	2.35465
11.2252	1.61975	11.2253	1.37975	11.2253	1.7481	11.2252	1.6039	11.225	2.3125
11.2335	1.58105	11.2337	1.33975	11.2337	1.7081	11.2335	1.5621	11.2333	2.2695
11.2418	1.544	11.242	1.3035	11.242	1.66915	11.2418	1.52325	11.2417	2.22945
11.2502	1.50555	11.2503	1.2659	11.2503	1.63035	11.2502	1.48235	11.25	2.1889
11.2585	1.46955	11.2587	1.2296	11.2587	1.59295	11.2585	1.44445	11.2583	2.14705
11.2668	1.43455	11.267	1.1938	11.267	1.55715	11.2668	1.4068	11.2667	2.1056
11.2752	1.39625	11.2753	1.1582	11.2753	1.51755	11.2752	1.3662	11.275	2.06295
11.2835	1.36145	11.2837	1.12255	11.2837	1.47995	11.2835	1.3263	11.2833	2.0203
11.2918	1.32635	11.292	1.0858	11.292	1.4415	11.2918	1.2872	11.2917	1.9766
11.3002	1.29165	11.3003	1.05165	11.3003	1.4056	11.3002	1.24865	11.3	1.935
11.3085	1.26065	11.3087	1.01995	11.3087	1.3719	11.3085	1.21335	11.3083	1.89485
11.3168	1.2294	11.317	0.98975	11.317	1.3373	11.3168	1.1781	11.3167	1.8549
11.3252	1.1965	11.3253	0.9578	11.3253	1.30245	11.3252	1.14235	11.325	1.812
11.3335	1.16535	11.3337	0.92785	11.3337	1.26905	11.3335	1.1055	11.3333	1.77195
11.3418	1.1379	11.342	0.90055	11.342	1.2371	11.3418	1.07345	11.3417	1.7318
11.3502	1.1103	11.3503	0.87405	11.3503	1.2069	11.3502	1.042	11.35	1.69295
11.3585	1.08185	11.3587	0.8453	11.3587	1.1759	11.3585	1.0084	11.3583	1.65195
11.3668	1.05515	11.367	0.82025	11.367	1.14685	11.3668	0.9789	11.3667	1.6132
11.3752	1.0296	11.3753	0.79485	11.3753	1.1181	11.3752	0.9476	11.375	1.5736
11.3835	1.0054	11.3837	0.7702	11.3837	1.09225	11.3835	0.91855	11.3833	1.5347
11.3918	0.98155	11.392	0.74695	11.392	1.0647	11.3918	0.889	11.3917	1.4974
11.4002	0.96135	11.4003	0.72675	11.4003	1.03955	11.4002	0.8641	11.4	1.4614
11.4085	0.94045	11.4087	0.70325	11.4087	1.01355	11.4085	0.83635	11.4083	1.42365
11.4168	0.91785	11.417	0.68395	11.417	0.98955	11.4168	0.81145	11.4167	1.38815
11.4252	0.89725	11.4253	0.66215	11.4253	0.9652	11.4252	0.78605	11.425	1.3521
11.4335	0.88	11.4337	0.64625	11.4337	0.94415	11.4335	0.7627	11.4333	1.3193
11.4418	0.8606	11.442	0.628	11.442	0.92445	11.4418	0.74015	11.4417	1.2849
11.4502	0.84335	11.4503	0.60925	11.4503	0.9023	11.4502	0.7171	11.45	1.25075
11.4585	0.8273	11.4587	0.5923	11.4587	0.88395	11.4585	0.6964	11.4583	1.21885
11.4668	0.80965	11.467	0.57645	11.467	0.86265	11.4668	0.6721	11.4667	1.18445
11.4752	0.79385	11.4753	0.5606	11.4753	0.84595	11.4752	0.65345	11.475	1.15525
11.4835	0.77845	11.4837	0.54475	11.4837	0.82825	11.4835	0.6336	11.4833	1.1251
11.4918	0.76445	11.492	0.53	11.492	0.80975	11.4918	0.6137	11.4917	1.0955
11.5002	0.751	11.5003	0.5174	11.5003	0.7957	11.5002	0.59865	11.5	1.0677
11.5085	0.73765	11.5087	0.5037	11.5087	0.7793	11.5085	0.58155	11.5083	1.0416
11.5168	0.7247	11.517	0.493	11.517	0.7635	11.5168	0.56555	11.5167	1.0159
11.5252	0.7119	11.5253	0.48195	11.5253	0.74955	11.5252	0.5498	11.525	0.98985
11.5335	0.69985	11.5337	0.4695	11.5337	0.73555	11.5335	0.534	11.5333	0.96695
11.5418	0.6921	11.542	0.4597	11.542	0.72435	11.5418	0.52125	11.5417	0.9435
11.5502	0.68075	11.5503	0.44815	11.5503	0.71045	11.5502	0.50625	11.55	0.9209
11.5585	0.67085	11.5587	0.43855	11.5587	0.698	11.5585	0.4947	11.5583	0.89895
11.5668	0.66005	11.567	0.4284	11.567	0.68655	11.5668	0.482	11.5667	0.8795
11.5752	0.65195	11.5753	0.41955	11.5753	0.6777	11.5752	0.47185	11.575	0.8588
11.5835	0.64385	11.5837	0.41105	11.5837	0.66675	11.5835	0.46035	11.5833	0.84095
11.5918	0.63465	11.592	0.40195	11.592	0.6552	11.5918	0.4491	11.5917	0.8217
11.6002	0.62605	11.6003	0.39315	11.6003	0.6461	11.6002	0.43765	11.6	0.80415
11.6085	0.6172	11.6087	0.3841	11.6087	0.63545	11.6085	0.4263	11.6083	0.78745
11.6168	0.61115	11.617	0.37805	11.617	0.62825	11.6168	0.418	11.6167	0.7744
11.6252	0.6039	11.6253	0.37055	11.6253	0.61955	11.6252	0.4072	11.625	0.75885
11.6335	0.59565	11.6337	0.3626	11.6337	0.61135	11.6335	0.39685	11.6333	0.74335
11.6418	0.5887	11.642	0.35445	11.642	0.6018	11.6418	0.38715	11.6417	0.72955
11.6502	0.58215	11.6503	0.3504	11.6503	0.59485	11.6502	0.3786	11.65	0.7175
11.6585	0.5749	11.6587	0.342	11.6587	0.58615	11.6585	0.36985	11.6583	0.7037
11.6668	0.5691	11.667	0.3364	11.667	0.57805	11.6668	0.36155	11.6667	0.69215
11.6752	0.5636	11.6753	0.33045	11.6753	0.5727	11.6752	0.35305	11.675	0.6821
11.6835	0.5563	11.6837	0.3248	11.6837	0.5646	11.6835	0.3444	11.6833	0.66945
11.6918	0.5485	11.692	0.31855	11.692	0.55945	11.6918	0.33835	11.6917	0.6609
11.7002	0.5418	11.7003	0.31455	11.7003	0.55205	11.7002	0.3317	11.7	0.6507
11.7085	0.53595	11.7087	0.30915	11.7087	0.54515	11.7085	0.32255	11.7083	0.64025
11.7168	0.53295	11.717	0.3048	11.717	0.5392	11.7168	0.3173	11.7167	0.6315
11.7252	0.52785	11.7253	0.3002	11.7253	0.5347	11.7252	0.31075	11.725	0.62425
11.7335	0.5237	11.7337	0.297	11.7337	0.5284	11.7335	0.3049	11.7333	0.6143
11.7418	0.51945	11.742	0.2929	11.742	0.52375	11.7418	0.2996	11.7417	0.60815
11.7502	0.5135	11.7503	0.28835	11.7503	0.5178	11.7502	0.29505	11.75	0.599
11.7585	0.5092	11.7587	0.28505	11.7587	0.51105	11.7585	0.2878	11.7583	0.59005
11.7668	0.50605	11.767	0.2818	11.767	0.50955	11.7668	0.2847	11.7667	0.5841
11.7752	0.5024	11.7753	0.27725	11.7753	0.50355	11.7752	0.2787	11.775	0.57765
11.7835	0.4992	11.7837	0.27455	11.7837	0.49925	11.7835	0.2729	11.7833	0.57185
11.7918	0.494	11.792	0.27	11.792	0.49475	11.7918	0.26875	11.7917	0.565
11.8002	0.49135	11.8003	0.26635	11.8003	0.4903	11.8002	0.2644	11.8	0.559
11.8085	0.48935	11.8087	0.2657	11.8087	0.4884	11.8085	0.26155	11.8083	0.55515
11.8168	0.4849	11.817	0.26045	11.817	0.4838	11.8168	0.2557	11.8167	0.54655
11.8252	0.47945	11.8253	0.2582	11.8253	0.4792	11.8252	0.25055	11.825	0.53995
11.8335	0.4788	11.8337	0.25455	11.8337	0.4769	11.8335	0.248	11.8333	0.5352
11.8418	0.47315	11.842	0.2505	11.842	0.4729	11.8418	0.2421	11.8417	0.52895
11.8502	0.4716	11.8503	0.24875	11.8503	0.4705	11.8502	0.23815	11.85	0.52515
11.8585	0.46775	11.8587	0.24495	11.8587	0.465	11.8585	0.2338	11.8583	0.51995
11.8668	0.46325	11.867	0.2416	11.867	0.46195	11.8668	0.22945	11.8667	0.5149
11.8752	0.4603	11.8753	0.2392	11.8753	0.4607	11.8752	0.2262	11.875	0.50955
11.8835	0.45735	11.8837	0.23585	11.8837	0.4568	11.8835	0.2228	11.8833	0.507
11.8918	0.45545	11.892	0.23515	11.892	0.45395	11.8918	0.21995	11.8917	0.5033
11.9002	0.45055	11.9003	0.2317	11.9003	0.45015	11.9002	0.2146	11.9	0.4976
11.9085	0.4498	11.9087	0.2295	11.9087	0.448	11.9085	0.21275	11.9083	0.49435
11.9168	0.44655	11.917	0.22725	11.917	0.4445	11.9168	0.2093	11.9167	0.4915
11.9252	0.44525	11.9253	0.2256	11.9253	0.4418	11.9252	0.20765	11.925	0.4888
11.9335	0.441	11.9337	0.22285	11.9337	0.4393	11.9335	0.20485	11.9333	0.4853
11.9418	0.44055	11.942	0.22115	11.942	0.43745	11.9418	0.2021	11.9417	0.4815
11.9502	0.43645	11.9503	0.21835	11.9503	0.4357	11.9502	0.2005	11.95	0.4773
11.9585	0.43435	11.9587	0.21605	11.9587	0.432	11.9585	0.19765	11.9583	0.4734
11.9668	0.4331	11.967	0.2146	11.967	0.4295	11.9668	0.19665	11.9667	0.4697
11.9752	0.4315	11.9753	0.2136	11.9753	0.42825	11.9752	0.19345	11.975	0.46735
11.9835	0.42845	11.9837	0.2095	11.9837	0.4237	11.9835	0.19175	11.9833	0.464
11.9918	0.42735	11.992	0.20725	11.992	0.42315	11.9918	0.1879	11.9917	0.46085
12.0002	0.42535	12.0003	0.2075	12.0003	0.42195	12.0002	0.186	12	0.4586
12.0085	0.42405	12.0087	0.2041	12.0087	0.4202	12.0085	0.1846	12.0083	0.4553
12.0168	0.42235	12.017	0.2029	12.017	0.4204	12.0168	0.1836	12.0167	0.45375
12.0252	0.42095	12.0253	0.20165	12.0253	0.4173	12.0252	0.17925	12.025	0.45
12.0335	0.42025	12.0337	0.20075	12.0337	0.416	12.0335	0.17835	12.0333	0.4479
12.0418	0.4155	12.042	0.19635	12.042	0.41255	12.0418	0.17465	12.0417	0.44275
12.0502	0.4143	12.0503	0.19365	12.0503	0.4114	12.0502	0.1725	12.05	0.4415
12.0585	0.41235	12.0587	0.19195	12.0587	0.4089	12.0585	0.1704	12.0583	0.439
12.0668	0.40895	12.067	0.1892	12.067	0.40605	12.0668	0.168	12.0667	0.436
12.0752	0.40805	12.0753	0.18895	12.0753	0.40515	12.0752	0.1668	12.075	0.4334
12.0835	0.4068	12.0837	0.18995	12.0837	0.4029	12.0835	0.1645	12.0833	0.4315
12.0918	0.4076	12.092	0.18835	12.092	0.4025	12.0918	0.1642	12.0917	0.4307
12.1002	0.4041	12.1003	0.18525	12.1003	0.4004	12.1002	0.1608	12.1	0.4262
12.1085	0.4035	12.1087	0.18355	12.1087	0.3992	12.1085	0.1596	12.1083	0.42565
12.1168	0.40105	12.117	0.18195	12.117	0.39695	12.1168	0.1576	12.1167	0.4225
12.1252	0.40085	12.1253	0.18195	12.1253	0.39735	12.1252	0.1569	12.125	0.42045
12.1335	0.3979	12.1337	0.17975	12.1337	0.39545	12.1335	0.15445	12.1333	0.41665
12.1418	0.3983	12.142	0.1784	12.142	0.39515	12.1418	0.1538	12.1417	0.41555
12.1502	0.3977	12.1503	0.17665	12.1503	0.39345	12.1502	0.15255	12.15	0.41505
12.1585	0.396	12.1587	0.1773	12.1587	0.3924	12.1585	0.15135	12.1583	0.40975
12.1668	0.3971	12.167	0.17485	12.167	0.3925	12.1668	0.1505	12.1667	0.40885
12.1752	0.3958	12.1753	0.1746	12.1753	0.39105	12.1752	0.15015	12.175	0.40875
12.1835	0.39335	12.1837	0.1722	12.1837	0.39	12.1835	0.14835	12.1833	0.407
12.1918	0.3937	12.192	0.171	12.192	0.3899	12.1918	0.1465	12.1917	0.40655
12.2002	0.3941	12.2003	0.17255	12.2003	0.39135	12.2002	0.1474	12.2	0.4036
12.2085	0.39375	12.2087	0.1704	12.2087	0.3902	12.2085	0.146	12.2083	0.40235
12.2168	0.39265	12.217	0.17	12.217	0.38985	12.2168	0.14465	12.2167	0.3991
12.2252	0.3883	12.2253	0.16635	12.2253	0.38615	12.2252	0.1403	12.225	0.39585
12.2335	0.3896	12.2337	0.16615	12.2337	0.3864	12.2335	0.1402	12.2333	0.39575
12.2418	0.3902	12.242	0.166	12.242	0.38505	12.2418	0.1394	12.2417	0.39495
12.2502	0.38915	12.2503	0.1647	12.2503	0.38625	12.2502	0.1381	12.25	0.3929
12.2585	0.3882	12.2587	0.1637	12.2587	0.3855	12.2585	0.13655	12.2583	0.39185
12.2668	0.38535	12.267	0.16235	12.267	0.384	12.2668	0.13445	12.2667	0.38845
12.2752	0.3854	12.2753	0.1638	12.2753	0.3843	12.2752	0.135	12.275	0.38925
12.2835	0.3843	12.2837	0.16275	12.2837	0.38195	12.2835	0.13235	12.2833	0.387
12.2918	0.3851	12.292	0.16365	12.292	0.38315	12.2918	0.13325	12.2917	0.3865
12.3002	0.3849	12.3003	0.16555	12.3003	0.3835	12.3002	0.1336	12.3	0.38585
12.3085	0.3841	12.3087	0.16575	12.3087	0.3835	12.3085	0.13515	12.3083	0.38605
12.3168	0.385	12.317	0.16535	12.317	0.3835	12.3168	0.1341	12.3167	0.38285
12.3252	0.38585	12.3253	0.16575	12.3253	0.38485	12.3252	0.1358	12.325	0.3836
12.3335	0.38615	12.3337	0.16525	12.3337	0.3832	12.3335	0.1345	12.3333	0.38005
12.3418	0.3861	12.342	0.1645	12.342	0.38375	12.3418	0.1343	12.3417	0.3795
12.3502	0.3873	12.3503	0.16585	12.3503	0.38555	12.3502	0.1343	12.35	0.3803
12.3585	0.38825	12.3587	0.16625	12.3587	0.3854	12.3585	0.1339	12.3583	0.37775
12.3668	0.38945	12.367	0.1668	12.367	0.38665	12.3668	0.1347	12.3667	0.3787
12.3752	0.392	12.3753	0.17035	12.3753	0.38915	12.3752	0.1349	12.375	0.37965
12.3835	0.3939	12.3837	0.1733	12.3837	0.3902	12.3835	0.13555	12.3833	0.37855
12.3918	0.39465	12.392	0.1729	12.392	0.39075	12.3918	0.1354	12.3917	0.37555
12.4002	0.39615	12.4003	0.17385	12.4003	0.39065	12.4002	0.13535	12.4	0.3748
12.4085	0.39855	12.4087	0.17875	12.4087	0.3926	12.4085	0.1375	12.4083	0.37555
12.4168	0.40045	12.417	0.1779	12.417	0.3954	12.4168	0.1375	12.4167	0.3729
12.4252	0.40415	12.4253	0.18205	12.4253	0.39665	12.4252	0.1386	12.425	0.37335
12.4335	0.4068	12.4337	0.18535	12.4337	0.39825	12.4335	0.13965	12.4333	0.3733
12.4418	0.4107	12.442	0.1897	12.442	0.4018	12.4418	0.1435	12.4417	0.37435
12.4502	0.4144	12.4503	0.1941	12.4503	0.40375	12.4502	0.14605	12.45	0.373
12.4585	0.41935	12.4587	0.1988	12.4587	0.40755	12.4585	0.1479	12.4583	0.373
12.4668	0.42305	12.467	0.2035	12.467	0.40995	12.4668	0.14955	12.4667	0.3741
12.4752	0.42885	12.4753	0.2075	12.4753	0.4136	12.4752	0.15295	12.475	0.37395
12.4835	0.4331	12.4837	0.21335	12.4837	0.4169	12.4835	0.15705	12.4833	0.374
12.4918	0.43985	12.492	0.21965	12.492	0.42235	12.4918	0.16075	12.4917	0.37505
12.5002	0.4444	12.5003	0.22445	12.5003	0.42745	12.5002	0.16615	12.5	0.37545
12.5085	0.4508	12.5087	0.2315	12.5087	0.4329	12.5085	0.17065	12.5083	0.37635
12.5168	0.45725	12.517	0.2395	12.517	0.4382	12.5168	0.17615	12.5167	0.37875
12.5252	0.4652	12.5253	0.24655	12.5253	0.44535	12.5252	0.18065	12.525	0.37925
12.5335	0.47	12.5337	0.25175	12.5337	0.4482	12.5335	0.1852	12.5333	0.381
12.5418	0.4772	12.542	0.2593	12.542	0.4542	12.5418	0.1917	12.5417	0.38305
12.5502	0.4843	12.5503	0.2648	12.5503	0.4609	12.5502	0.1979	12.55	0.38505
12.5585	0.49235	12.5587	0.27245	12.5587	0.4689	12.5585	0.20455	12.5583	0.38945
12.5668	0.4991	12.567	0.2793	12.567	0.4754	12.5668	0.21055	12.5667	0.3932
12.5752	0.5071	12.5753	0.28765	12.5753	0.4837	12.5752	0.2159	12.575	0.39545
12.5835	0.51295	12.5837	0.2954	12.5837	0.49095	12.5835	0.22375	12.5833	0.39775
12.5918	0.5192	12.592	0.3018	12.592	0.4965	12.5918	0.2299	12.5917	0.40095
12.6002	0.5258	12.6003	0.30875	12.6003	0.5018	12.6002	0.2341	12.6	0.40445
12.6085	0.53365	12.6087	0.3146	12.6087	0.5102	12.6085	0.24195	12.6083	0.4108
12.6168	0.54035	12.617	0.32155	12.617	0.5168	12.6168	0.24925	12.6167	0.4151
12.6252	0.54605	12.6253	0.329	12.6253	0.52425	12.6252	0.25505	12.625	0.42025
12.6335	0.55215	12.6337	0.33635	12.6337	0.5318	12.6335	0.26265	12.6333	0.4257
12.6418	0.55975	12.642	0.34465	12.642	0.53875	12.6418	0.26985	12.6417	0.43035
12.6502	0.5668	12.6503	0.35135	12.6503	0.54675	12.6502	0.27705	12.65	0.4373
12.6585	0.5726	12.6587	0.3585	12.6587	0.55385	12.6585	0.2842	12.6583	0.44405
12.6668	0.58	12.667	0.36555	12.667	0.5615	12.6668	0.2913	12.6667	0.4511
12.6752	0.5842	12.6753	0.37085	12.6753	0.56505	12.6752	0.2982	12.675	0.4574
12.6835	0.59	12.6837	0.37785	12.6837	0.57305	12.6835	0.3056	12.6833	0.465
12.6918	0.59675	12.692	0.38385	12.692	0.57945	12.6918	0.31345	12.6917	0.47215
12.7002	0.6021	12.7003	0.3896	12.7003	0.58645	12.7002	0.32065	12.7	0.4807
12.7085	0.6085	12.7087	0.39435	12.7087	0.5913	12.7085	0.3276	12.7083	0.48715
12.7168	0.6128	12.717	0.39845	12.717	0.59625	12.7168	0.33275	12.7167	0.4928
12.7252	0.6183	12.7253	0.40495	12.7253	0.603	12.7252	0.33975	12.725	0.50195
12.7335	0.62065	12.7337	0.4077	12.7337	0.60645	12.7335	0.34375	12.7333	0.5066
12.7418	0.6262	12.742	0.4127	12.742	0.61175	12.7418	0.35145	12.7417	0.5142
12.7502	0.62795	12.7503	0.41425	12.7503	0.6158	12.7502	0.35435	12.75	0.5195
12.7585	0.6329	12.7587	0.41885	12.7587	0.6221	12.7585	0.3599	12.7583	0.52785
12.7668	0.6363	12.767	0.4218	12.767	0.62575	12.7668	0.36345	12.7667	0.5351
12.7752	0.64015	12.7753	0.42455	12.7753	0.63045	12.7752	0.3682	12.775	0.5426
12.7835	0.64255	12.7837	0.42755	12.7837	0.63395	12.7835	0.3713	12.7833	0.54785
12.7918	0.64335	12.792	0.42865	12.792	0.636	12.7918	0.3747	12.7917	0.5543
12.8002	0.64575	12.8003	0.4299	12.8003	0.6392	12.8002	0.3767	12.8	0.5612
12.8085	0.6475	12.8087	0.43265	12.8087	0.64145	12.8085	0.38065	12.8083	0.5685
12.8168	0.64725	12.817	0.4339	12.817	0.64295	12.8168	0.3842	12.8167	0.57495
12.8252	0.64845	12.8253	0.43415	12.8253	0.64465	12.8252	0.38625	12.825	0.57965
12.8335	0.65005	12.8337	0.4368	12.8337	0.64765	12.8335	0.38695	12.8333	0.5854
12.8418	0.65205	12.842	0.4396	12.842	0.64905	12.8418	0.38995	12.8417	0.5925
12.8502	0.6531	12.8503	0.4391	12.8503	0.64855	12.8502	0.39125	12.85	0.59605
12.8585	0.65555	12.8587	0.4413	12.8587	0.65265	12.8585	0.39355	12.8583	0.60135
12.8668	0.65545	12.867	0.44295	12.867	0.6532	12.8668	0.3952	12.8667	0.60565
12.8752	0.65745	12.8753	0.4437	12.8753	0.655	12.8752	0.39835	12.875	0.6108
12.8835	0.65805	12.8837	0.44475	12.8837	0.6576	12.8835	0.3997	12.8833	0.614
12.8918	0.6584	12.892	0.44475	12.892	0.65845	12.8918	0.40225	12.8917	0.6186
12.9002	0.66105	12.9003	0.4486	12.9003	0.65975	12.9002	0.4038	12.9	0.62285
12.9085	0.6624	12.9087	0.44865	12.9087	0.6621	12.9085	0.40545	12.9083	0.62685
12.9168	0.66215	12.917	0.4463	12.917	0.6625	12.9168	0.40505	12.9167	0.62805
12.9252	0.66415	12.9253	0.45095	12.9253	0.66565	12.9252	0.40695	12.925	0.6319
12.9335	0.6667	12.9337	0.45285	12.9337	0.66585	12.9335	0.40845	12.9333	0.6373
12.9418	0.6668	12.942	0.45155	12.942	0.6684	12.9418	0.40965	12.9417	0.63925
12.9502	0.66625	12.9503	0.4521	12.9503	0.6684	12.9502	0.41	12.95	0.6409
12.9585	0.66715	12.9587	0.4524	12.9587	0.66805	12.9585	0.41115	12.9583	0.6425
12.9668	0.6677	12.967	0.4531	12.967	0.66815	12.9668	0.4094	12.9667	0.6426
12.9752	0.6691	12.9753	0.4541	12.9753	0.67105	12.9752	0.40985	12.975	0.64715
12.9835	0.6698	12.9837	0.4542	12.9837	0.67045	12.9835	0.41215	12.9833	0.6481
12.9918	0.6704	12.992	0.4539	12.992	0.671	12.9918	0.41115	12.9917	0.65205
13.0002	0.6725	13.0003	0.45615	13.0003	0.6728	13.0002	0.41365	13	0.6526
13.0085	0.6719	13.0087	0.45555	13.0087	0.6733	13.0085	0.413	13.0083	0.6524
13.0168	0.67085	13.017	0.45465	13.017	0.6737	13.0168	0.41275	13.0167	0.65325
13.0252	0.6719	13.0253	0.45625	13.0253	0.674	13.0252	0.4126	13.025	0.6555
13.0335	0.6724	13.0337	0.45655	13.0337	0.67465	13.0335	0.4129	13.0333	0.656
13.0418	0.6742	13.042	0.4565	13.042	0.6768	13.0418	0.41575	13.0417	0.65795
13.0502	0.67275	13.0503	0.456	13.0503	0.67675	13.0502	0.41615	13.05	0.66035
13.0585	0.67315	13.0587	0.45535	13.0587	0.67685	13.0585	0.4177	13.0583	0.6616
13.0668	0.673	13.067	0.4534	13.067	0.67695	13.0668	0.4187	13.0667	0.66285
13.0752	0.67085	13.0753	0.45115	13.0753	0.6767	13.0752	0.419	13.075	0.6635
13.0835	0.6702	13.0837	0.449	13.0837	0.67505	13.0835	0.41875	13.0833	0.66485
13.0918	0.67	13.092	0.44605	13.092	0.67485	13.0918	0.4191	13.0917	0.6654
13.1002	0.6675	13.1003	0.44235	13.1003	0.6743	13.1002	0.41915	13.1	0.66645
13.1085	0.66385	13.1087	0.4381	13.1087	0.6723	13.1085	0.41775	13.1083	0.66655
13.1168	0.662	13.117	0.4329	13.117	0.6705	13.1168	0.41555	13.1167	0.6679
13.1252	0.6578	13.1253	0.42765	13.1253	0.66865	13.1252	0.4153	13.125	0.6683
13.1335	0.6527	13.1337	0.42155	13.1337	0.66525	13.1335	0.4141	13.1333	0.6686
13.1418	0.64785	13.142	0.41265	13.142	0.66175	13.1418	0.41125	13.1417	0.6697
13.1502	0.6421	13.1503	0.40515	13.1503	0.65795	13.1502	0.40855	13.15	0.6698
13.1585	0.6338	13.1587	0.39635	13.1587	0.65215	13.1585	0.4036	13.1583	0.66965
13.1668	0.62435	13.167	0.3849	13.167	0.64425	13.1668	0.397	13.1667	0.6683
13.1752	0.61685	13.1753	0.3756	13.1753	0.6367	13.1752	0.39325	13.175	0.6703
13.1835	0.60525	13.1837	0.3622	13.1837	0.62915	13.1835	0.38615	13.1833	0.6686
13.1918	0.5964	13.192	0.3496	13.192	0.6207	13.1918	0.37995	13.1917	0.6685
13.2002	0.58295	13.2003	0.33815	13.2003	0.6108	13.2002	0.3736	13.2	0.66815
13.2085	0.5716	13.2087	0.32585	13.2087	0.6003	13.2085	0.3644	13.2083	0.6666
13.2168	0.55925	13.217	0.3134	13.217	0.5906	13.2168	0.35815	13.2167	0.66695
13.2252	0.5463	13.2253	0.30005	13.2253	0.57765	13.2252	0.34725	13.225	0.66525
13.2335	0.5349	13.2337	0.2875	13.2337	0.5654	13.2335	0.3379	13.2333	0.6643
13.2418	0.523	13.242	0.2772	13.242	0.55585	13.2418	0.3282	13.2417	0.66385
13.2502	0.51075	13.2503	0.26535	13.2503	0.54165	13.2502	0.31745	13.25	0.65785
13.2585	0.49775	13.2587	0.25485	13.2587	0.52965	13.2585	0.3067	13.2583	0.6557
13.2668	0.48485	13.267	0.2429	13.267	0.51655	13.2668	0.294	13.2667	0.6509
13.2752	0.47445	13.2753	0.23285	13.2753	0.50245	13.2752	0.28295	13.275	0.64715
13.2835	0.46225	13.2837	0.22255	13.2837	0.48955	13.2835	0.2688	13.2833	0.63995
13.2918	0.4529	13.292	0.2135	13.292	0.47735	13.2918	0.2571	13.2917	0.6339
13.3002	0.44095	13.3003	0.2039	13.3003	0.46445	13.3002	0.2434	13.3	0.6267
13.3085	0.4327	13.3087	0.1984	13.3087	0.4565	13.3085	0.2339	13.3083	0.6214
13.3168	0.42535	13.317	0.19025	13.317	0.44615	13.3168	0.2221	13.3167	0.6134
13.3252	0.4169	13.3253	0.18285	13.3253	0.43765	13.3252	0.20935	13.325	0.60195
13.3335	0.41235	13.3337	0.1788	13.3337	0.42965	13.3335	0.19925	13.3333	0.59115
13.3418	0.4037	13.342	0.17405	13.342	0.4188	13.3418	0.1868	13.3417	0.58035
13.3502	0.39715	13.3503	0.1674	13.3503	0.41105	13.3502	0.1782	13.35	0.56785
13.3585	0.39105	13.3587	0.1627	13.3587	0.4028	13.3585	0.1686	13.3583	0.55565
13.3668	0.38535	13.367	0.1584	13.367	0.3968	13.3668	0.1618	13.3667	0.54535
13.3752	0.38415	13.3753	0.1567	13.3753	0.3922	13.3752	0.15395	13.375	0.532
13.3835	0.37835	13.3837	0.1532	13.3837	0.38545	13.3835	0.1475	13.3833	0.51785
13.3918	0.3739	13.392	0.1489	13.392	0.37965	13.3918	0.1411	13.3917	0.5058
13.4002	0.372	13.4003	0.1467	13.4003	0.37415	13.4002	0.1333	13.4	0.49025
13.4085	0.36855	13.4087	0.1442	13.4087	0.37055	13.4085	0.129	13.4083	0.4771
13.4168	0.36655	13.417	0.14345	13.417	0.36745	13.4168	0.1259	13.4167	0.46605
13.4252	0.3628	13.4253	0.14115	13.4253	0.36285	13.4252	0.1212	13.425	0.45155
13.4335	0.36115	13.4337	0.14075	13.4337	0.36195	13.4335	0.11925	13.4333	0.44065
13.4418	0.36185	13.442	0.14105	13.442	0.36095	13.4418	0.1181	13.4417	0.4311
13.4502	0.35845	13.4503	0.13765	13.4503	0.35715	13.4502	0.11395	13.45	0.41905
13.4585	0.35725	13.4587	0.1384	13.4587	0.35625	13.4585	0.11275	13.4583	0.41145
13.4668	0.35765	13.467	0.1369	13.467	0.3534	13.4668	0.1116	13.4667	0.40345
13.4752	0.355	13.4753	0.13395	13.4753	0.3518	13.4752	0.10865	13.475	0.39415
13.4835	0.3542	13.4837	0.13115	13.4837	0.34895	13.4835	0.10475	13.4833	0.38565
13.4918	0.35305	13.492	0.13045	13.492	0.348	13.4918	0.1032	13.4917	0.3786
13.5002	0.35205	13.5003	0.1287	13.5003	0.34705	13.5002	0.1031	13.5	0.3738
13.5085	0.35105	13.5087	0.1282	13.5087	0.34555	13.5085	0.09905	13.5083	0.3681
13.5168	0.35105	13.517	0.127	13.517	0.3452	13.5168	0.09955	13.5167	0.36265
13.5252	0.34995	13.5253	0.12765	13.5253	0.3445	13.5252	0.0991	13.525	0.3594
13.5335	0.3481	13.5337	0.12325	13.5337	0.34245	13.5335	0.0945	13.5333	0.35365
13.5418	0.3451	13.542	0.12165	13.542	0.3412	13.5418	0.09295	13.5417	0.3485
13.5502	0.3467	13.5503	0.12095	13.5503	0.3404	13.5502	0.09375	13.55	0.3473
13.5585	0.3443	13.5587	0.1197	13.5587	0.3397	13.5585	0.09035	13.5583	0.34285
13.5668	0.3434	13.567	0.1201	13.567	0.33815	13.5668	0.0906	13.5667	0.34155
13.5752	0.3432	13.5753	0.11815	13.5753	0.337	13.5752	0.0881	13.575	0.33885
13.5835	0.34195	13.5837	0.1181	13.5837	0.33625	13.5835	0.08715	13.5833	0.3368
13.5918	0.33925	13.592	0.1181	13.592	0.33395	13.5918	0.08445	13.5917	0.33415
13.6002	0.3408	13.6003	0.1164	13.6003	0.33325	13.6002	0.0851	13.6	0.3339
13.6085	0.34035	13.6087	0.11765	13.6087	0.3335	13.6085	0.0845	13.6083	0.3317
13.6168	0.3383	13.617	0.11685	13.617	0.3304	13.6168	0.0839	13.6167	0.32875
13.6252	0.33915	13.6253	0.1176	13.6253	0.3312	13.6252	0.0827	13.625	0.32865
13.6335	0.33995	13.6337	0.11765	13.6337	0.33155	13.6335	0.08355	13.6333	0.32805
13.6418	0.33885	13.642	0.116	13.642	0.3309	13.6418	0.08145	13.6417	0.32615
13.6502	0.3381	13.6503	0.1156	13.6503	0.32895	13.6502	0.0827	13.65	0.3251
13.6585	0.33895	13.6587	0.11585	13.6587	0.32855	13.6585	0.08165	13.6583	0.32335
13.6668	0.33795	13.667	0.11505	13.667	0.3277	13.6668	0.08025	13.6667	0.32095
13.6752	0.3374	13.6753	0.11215	13.6753	0.3275	13.6752	0.0796	13.675	0.32045
13.6835	0.3361	13.6837	0.11415	13.6837	0.32845	13.6835	0.0794	13.6833	0.319
13.6918	0.3378	13.692	0.11415	13.692	0.32935	13.6918	0.07885	13.6917	0.31805
13.7002	0.3364	13.7003	0.1113	13.7003	0.3278	13.7002	0.07765	13.7	0.31645
13.7085	0.33775	13.7087	0.11255	13.7087	0.3285	13.7085	0.07755	13.7083	0.3169
13.7168	0.33725	13.717	0.1123	13.717	0.3305	13.7168	0.0753	13.7167	0.31565
13.7252	0.3368	13.7253	0.1119	13.7253	0.3291	13.7252	0.0761	13.725	0.3148
13.7335	0.33575	13.7337	0.11075	13.7337	0.3274	13.7335	0.07415	13.7333	0.3138
13.7418	0.3323	13.742	0.1092	13.742	0.3257	13.7418	0.0726	13.7417	0.31185
13.7502	0.3339	13.7503	0.1093	13.7503	0.32645	13.7502	0.0712	13.75	0.31045
13.7585	0.33205	13.7587	0.1086	13.7587	0.32475	13.7585	0.07085	13.7583	0.3091
13.7668	0.3304	13.767	0.1069	13.767	0.32425	13.7668	0.0693	13.7667	0.30825
13.7752	0.32965	13.7753	0.10805	13.7753	0.32405	13.7752	0.06745	13.775	0.30795
13.7835	0.33325	13.7837	0.10815	13.7837	0.3252	13.7835	0.06875	13.7833	0.30835
13.7918	0.3321	13.792	0.10885	13.792	0.32495	13.7918	0.0686	13.7917	0.30845
13.8002	0.3304	13.8003	0.1083	13.8003	0.32365	13.8002	0.06755	13.8	0.3073
13.8085	0.3309	13.8087	0.1085	13.8087	0.324	13.8085	0.068	13.8083	0.3082
13.8168	0.33165	13.817	0.10935	13.817	0.32135	13.8168	0.06855	13.8167	0.30585
13.8252	0.33295	13.8253	0.1097	13.8253	0.3251	13.8252	0.07055	13.825	0.3073
13.8335	0.33135	13.8337	0.1095	13.8337	0.3239	13.8335	0.069	13.8333	0.3055
13.8418	0.33295	13.842	0.11095	13.842	0.32395	13.8418	0.0686	13.8417	0.3048
13.8502	0.33305	13.8503	0.10955	13.8503	0.32515	13.8502	0.0688	13.85	0.30515
13.8585	0.33425	13.8587	0.1105	13.8587	0.32375	13.8585	0.0686	13.8583	0.3053
13.8668	0.33285	13.867	0.10985	13.867	0.3234	13.8668	0.06785	13.8667	0.30315
13.8752	0.33295	13.8753	0.10915	13.8753	0.3246	13.8752	0.06815	13.875	0.3044
13.8835	0.3342	13.8837	0.1097	13.8837	0.3255	13.8835	0.0684	13.8833	0.30385
13.8918	0.3342	13.892	0.10875	13.892	0.3266	13.8918	0.06845	13.8917	0.3046
13.9002	0.3345	13.9003	0.1111	13.9003	0.3265	13.9002	0.0671	13.9	0.30305
13.9085	0.3347	13.9087	0.10925	13.9087	0.32455	13.9085	0.0674	13.9083	0.3021
13.9168	0.3337	13.917	0.1083	13.917	0.32485	13.9168	0.06655	13.9167	0.30225
13.9252	0.3334	13.9253	0.1077	13.9253	0.32555	13.9252	0.06535	13.925	0.3019
13.9335	0.33365	13.9337	0.10845	13.9337	0.3265	13.9335	0.0657	13.9333	0.30155
13.9418	0.33315	13.942	0.10755	13.942	0.3253	13.9418	0.06495	13.9417	0.3021
13.9502	0.33325	13.9503	0.10875	13.9503	0.3261	13.9502	0.06495	13.95	0.30245
13.9585	0.33415	13.9587	0.1099	13.9587	0.32545	13.9585	0.06365	13.9583	0.3033
13.9668	0.33325	13.967	0.10965	13.967	0.32605	13.9668	0.0644	13.9667	0.3035
13.9752	0.3313	13.9753	0.10825	13.9753	0.3248	13.9752	0.06145	13.975	0.3023
13.9835	0.33445	13.9837	0.11	13.9837	0.32555	13.9835	0.063	13.9833	0.3046
13.9918	0.3344	13.992	0.11005	13.992	0.32465	13.9918	0.0636	13.9917	0.3037
14.0002	0.3338	14.0003	0.10985	14.0003	0.3253	14.0002	0.0633	14	0.30505
14.0085	0.33325	14.0087	0.11125	14.0087	0.3266	14.0085	0.064	14.0083	0.30415
14.0168	0.33435	14.017	0.1114	14.017	0.3246	14.0168	0.06285	14.0167	0.3041
14.0252	0.33605	14.0253	0.1112	14.0253	0.3259	14.0252	0.06515	14.025	0.30615
14.0335	0.3348	14.0337	0.1114	14.0337	0.32515	14.0335	0.06355	14.0333	0.30455
14.0418	0.3363	14.042	0.1108	14.042	0.3241	14.0418	0.06385	14.0417	0.3044
14.0502	0.33585	14.0503	0.11035	14.0503	0.3243	14.0502	0.06275	14.05	0.30505
14.0585	0.33675	14.0587	0.11	14.0587	0.32385	14.0585	0.0633	14.0583	0.3056
14.0668	0.33635	14.067	0.1092	14.067	0.3262	14.0668	0.0634	14.0667	0.30645
14.0752	0.33725	14.0753	0.11055	14.0753	0.3271	14.0752	0.0646	14.075	0.3066
14.0835	0.33775	14.0837	0.1106	14.0837	0.3278	14.0835	0.06365	14.0833	0.30835
14.0918	0.33605	14.092	0.11145	14.092	0.3269	14.0918	0.06155	14.0917	0.30795
14.1002	0.33575	14.1003	0.1079	14.1003	0.3245	14.1002	0.059	14.1	0.30385
14.1085	0.3372	14.1087	0.1103	14.1087	0.3259	14.1085	0.06145	14.1083	0.30715
14.1168	0.33675	14.117	0.10915	14.117	0.32615	14.1168	0.0595	14.1167	0.30805
14.1252	0.33655	14.1253	0.1078	14.1253	0.3263	14.1252	0.0587	14.125	0.3072
14.1335	0.3367	14.1337	0.10885	14.1337	0.3258	14.1335	0.05985	14.1333	0.30945
14.1418	0.3357	14.142	0.10915	14.142	0.32575	14.1418	0.05935	14.1417	0.3095
14.1502	0.33565	14.1503	0.10985	14.1503	0.32505	14.1502	0.058	14.15	0.30945
14.1585	0.3381	14.1587	0.11035	14.1587	0.3247	14.1585	0.05885	14.1583	0.3114
14.1668	0.33695	14.167	0.1106	14.167	0.32425	14.1668	0.0587	14.1667	0.31235
14.1752	0.3359	14.1753	0.1111	14.1753	0.3253	14.1752	0.0571	14.175	0.3119
14.1835	0.3368	14.1837	0.1102	14.1837	0.32425	14.1835	0.05825	14.1833	0.31295
14.1918	0.3382	14.192	0.1116	14.192	0.3254	14.1918	0.06025	14.1917	0.31355
14.2002	0.33695	14.2003	0.11115	14.2003	0.32375	14.2002	0.0579	14.2	0.31025
14.2085	0.3364	14.2087	0.1116	14.2087	0.3256	14.2085	0.0588	14.2083	0.31415
14.2168	0.33825	14.217	0.1115	14.217	0.32575	14.2168	0.0591	14.2167	0.31425
14.2252	0.33835	14.2253	0.11155	14.2253	0.32505	14.2252	0.0591	14.225	0.31555
14.2335	0.3368	14.2337	0.10965	14.2337	0.32245	14.2335	0.05775	14.2333	0.3148
14.2418	0.3359	14.242	0.1096	14.242	0.3232	14.2418	0.05855	14.2417	0.31585
14.2502	0.33725	14.2503	0.11135	14.2503	0.3259	14.2502	0.05895	14.25	0.3179
14.2585	0.3385	14.2587	0.11095	14.2587	0.32805	14.2585	0.05865	14.2583	0.31905
14.2668	0.3378	14.267	0.11055	14.267	0.32635	14.2668	0.0585	14.2667	0.31875
14.2752	0.33735	14.2753	0.1116	14.2753	0.3279	14.2752	0.0595	14.275	0.3202
14.2835	0.338	14.2837	0.11145	14.2837	0.32585	14.2835	0.05875	14.2833	0.32005
14.2918	0.33465	14.292	0.1088	14.292	0.32385	14.2918	0.05675	14.2917	0.31885
14.3002	0.33395	14.3003	0.10875	14.3003	0.32305	14.3002	0.05635	14.3	0.3192
14.3085	0.3332	14.3087	0.1086	14.3087	0.32315	14.3085	0.0559	14.3083	0.3187
14.3168	0.3337	14.317	0.1092	14.317	0.32285	14.3168	0.05615	14.3167	0.32185
14.3252	0.33275	14.3253	0.1068	14.3253	0.32235	14.3252	0.05595	14.325	0.32
14.3335	0.33135	14.3337	0.10895	14.3337	0.3218	14.3335	0.0543	14.3333	0.3223
14.3418	0.33085	14.342	0.1077	14.342	0.32085	14.3418	0.05365	14.3417	0.32205
14.3502	0.3319	14.3503	0.10875	14.3503	0.32065	14.3502	0.054	14.35	0.32355
14.3585	0.32925	14.3587	0.1059	14.3587	0.31815	14.3585	0.05215	14.3583	0.32075
14.3668	0.32955	14.367	0.1074	14.367	0.319	14.3668	0.0536	14.3667	0.32345
14.3752	0.3307	14.3753	0.1087	14.3753	0.31875	14.3752	0.05605	14.375	0.3239
14.3835	0.33145	14.3837	0.10995	14.3837	0.31965	14.3835	0.05685	14.3833	0.3253
14.3918	0.32905	14.392	0.1097	14.392	0.3192	14.3918	0.0545	14.3917	0.324
14.4002	0.32965	14.4003	0.1091	14.4003	0.3187	14.4002	0.056	14.4	0.3248
14.4085	0.33155	14.4087	0.1101	14.4087	0.31725	14.4085	0.0558	14.4083	0.32575
14.4168	0.33015	14.417	0.1073	14.417	0.31615	14.4168	0.0554	14.4167	0.32405
14.4252	0.32875	14.4253	0.1065	14.4253	0.315	14.4252	0.0544	14.425	0.32355
14.4335	0.33115	14.4337	0.10715	14.4337	0.3182	14.4335	0.05685	14.4333	0.3258
14.4418	0.3296	14.442	0.1077	14.442	0.3163	14.4418	0.05595	14.4417	0.32535
14.4502	0.3303	14.4503	0.1079	14.4503	0.31685	14.4502	0.0551	14.45	0.32515
14.4585	0.32975	14.4587	0.10655	14.4587	0.3173	14.4585	0.0549	14.4583	0.3232
14.4668	0.33055	14.467	0.1072	14.467	0.31615	14.4668	0.05575	14.4667	0.3245
14.4752	0.32865	14.4753	0.10695	14.4753	0.31545	14.4752	0.05385	14.475	0.32285
14.4835	0.32795	14.4837	0.1063	14.4837	0.3135	14.4835	0.0515	14.4833	0.3201
14.4918	0.3266	14.492	0.10375	14.492	0.3121	14.4918	0.0504	14.4917	0.3199
14.5002	0.32605	14.5003	0.1029	14.5003	0.3115	14.5002	0.05005	14.5	0.3171
14.5085	0.32695	14.5087	0.1037	14.5087	0.3118	14.5085	0.05035	14.5083	0.31895
14.5168	0.3225	14.517	0.1012	14.517	0.3089	14.5168	0.0492	14.5167	0.3161
14.5252	0.3247	14.5253	0.1022	14.5253	0.31005	14.5252	0.05005	14.525	0.3174
14.5335	0.3258	14.5337	0.1044	14.5337	0.311	14.5335	0.0506	14.5333	0.31655
14.5418	0.32465	14.542	0.10195	14.542	0.30895	14.5418	0.0491	14.5417	0.31585
14.5502	0.32455	14.5503	0.1029	14.5503	0.30965	14.5502	0.05075	14.55	0.31655
14.5585	0.3237	14.5587	0.103	14.5587	0.30975	14.5585	0.05065	14.5583	0.3161
14.5668	0.3245	14.567	0.1046	14.567	0.30995	14.5668	0.0505	14.5667	0.3158
14.5752	0.32545	14.5753	0.10285	14.5753	0.31055	14.5752	0.05045	14.575	0.31425
14.5835	0.32445	14.5837	0.10225	14.5837	0.3099	14.5835	0.05055	14.5833	0.31265
14.5918	0.32565	14.592	0.1025	14.592	0.3097	14.5918	0.05155	14.5917	0.3133
14.6002	0.3262	14.6003	0.1032	14.6003	0.31045	14.6002	0.05305	14.6	0.31305
14.6085	0.3252	14.6087	0.1013	14.6087	0.3103	14.6085	0.0531	14.6083	0.31195
14.6168	0.3256	14.617	0.101	14.617	0.30915	14.6168	0.0519	14.6167	0.3107
14.6252	0.32915	14.6253	0.10435	14.6253	0.3119	14.6252	0.055	14.625	0.3126
14.6335	0.32725	14.6337	0.10085	14.6337	0.3093	14.6335	0.05205	14.6333	0.31165
14.6418	0.3276	14.642	0.1012	14.642	0.31125	14.6418	0.05335	14.6417	0.3099
14.6502	0.32665	14.6503	0.1005	14.6503	0.30885	14.6502	0.05235	14.65	0.3075
14.6585	0.3273	14.6587	0.09955	14.6587	0.31055	14.6585	0.05155	14.6583	0.30845
14.6668	0.3255	14.667	0.0974	14.667	0.3096	14.6668	0.05025	14.6667	0.3057
14.6752	0.3261	14.6753	0.09755	14.6753	0.30935	14.6752	0.0503	14.675	0.30575
14.6835	0.325	14.6837	0.09645	14.6837	0.3093	14.6835	0.04905	14.6833	0.3051
14.6918	0.32495	14.692	0.09675	14.692	0.3107	14.6918	0.05205	14.6917	0.30585
14.7002	0.32325	14.7003	0.09515	14.7003	0.3077	14.7002	0.0502	14.7	0.30305
14.7085	0.3225	14.7087	0.094	14.7087	0.3068	14.7085	0.04795	14.7083	0.30175
14.7168	0.32345	14.717	0.09545	14.717	0.30675	14.7168	0.0482	14.7167	0.302
14.7252	0.3236	14.7253	0.0967	14.7253	0.30985	14.7252	0.0492	14.725	0.3026
14.7335	0.3227	14.7337	0.09665	14.7337	0.30605	14.7335	0.04995	14.7333	0.30065
14.7418	0.3247	14.742	0.09605	14.742	0.3068	14.7418	0.049	14.7417	0.30225
14.7502	0.32225	14.7503	0.09455	14.7503	0.30585	14.7502	0.04895	14.75	0.3012
14.7585	0.32295	14.7587	0.0952	14.7587	0.30725	14.7585	0.0501	14.7583	0.30005
14.7668	0.3233	14.767	0.0951	14.767	0.30745	14.7668	0.05125	14.7667	0.2993
14.7752	0.3257	14.7753	0.09525	14.7753	0.30705	14.7752	0.0515	14.775	0.2996
14.7835	0.32455	14.7837	0.09425	14.7837	0.30625	14.7835	0.05015	14.7833	0.29825
14.7918	0.32455	14.792	0.0928	14.792	0.30585	14.7918	0.04925	14.7917	0.29785
14.8002	0.32505	14.8003	0.0937	14.8003	0.3054	14.8002	0.0501	14.8	0.2982
14.8085	0.3251	14.8087	0.09315	14.8087	0.30675	14.8085	0.04995	14.8083	0.29865
14.8168	0.3249	14.817	0.09355	14.817	0.3077	14.8168	0.04885	14.8167	0.2985
14.8252	0.32525	14.8253	0.0924	14.8253	0.3069	14.8252	0.049	14.825	0.29685
14.8335	0.3259	14.8337	0.0922	14.8337	0.3076	14.8335	0.04855	14.8333	0.2974
14.8418	0.32665	14.842	0.0933	14.842	0.30685	14.8418	0.0479	14.8417	0.2964
14.8502	0.32435	14.8503	0.0907	14.8503	0.30655	14.8502	0.04555	14.85	0.29505
14.8585	0.3255	14.8587	0.09065	14.8587	0.30585	14.8585	0.04575	14.8583	0.2957
14.8668	0.32465	14.867	0.09065	14.867	0.30475	14.8668	0.0424	14.8667	0.2949
14.8752	0.3233	14.8753	0.08965	14.8753	0.3042	14.8752	0.0408	14.875	0.296
14.8835	0.3253	14.8837	0.08895	14.8837	0.30435	14.8835	0.04285	14.8833	0.2963
14.8918	0.32535	14.892	0.0895	14.892	0.30455	14.8918	0.0425	14.8917	0.29565
14.9002	0.3215	14.9003	0.08825	14.9003	0.3026	14.9002	0.0375	14.9	0.29355
14.9085	0.321	14.9087	0.08705	14.9087	0.30105	14.9085	0.0384	14.9083	0.2934
14.9168	0.32435	14.917	0.08915	14.917	0.30265	14.9168	0.03915	14.9167	0.29565
14.9252	0.32485	14.9253	0.089	14.9253	0.30145	14.9252	0.039	14.925	0.29625
14.9335	0.32385	14.9337	0.0891	14.9337	0.3019	14.9335	0.04045	14.9333	0.2951
14.9418	0.3246	14.942	0.09005	14.942	0.30215	14.9418	0.0406	14.9417	0.295
14.9502	0.3252	14.9503	0.0896	14.9503	0.30305	14.9502	0.04035	14.95	0.29645
14.9585	0.3251	14.9587	0.0892	14.9587	0.3035	14.9585	0.041	14.9583	0.297
14.9668	0.327	14.967	0.09005	14.967	0.3025	14.9668	0.0401	14.9667	0.29775
14.9752	0.32945	14.9753	0.0905	14.9753	0.303	14.9752	0.0399	14.975	0.2977
14.9835	0.3285	14.9837	0.09195	14.9837	0.30285	14.9835	0.0402	14.9833	0.29745
14.9918	0.32755	14.992	0.09035	14.992	0.303	14.9918	0.03845	14.9917	0.29595
15.0002	0.33025	15.0003	0.0924	15.0003	0.3052	15.0002	0.04045	15	0.29895
15.0085	0.332	15.0087	0.09095	15.0087	0.30645	15.0085	0.04035	15.0083	0.29855
15.0168	0.33105	15.017	0.0908	15.017	0.3053	15.0168	0.0377	15.0167	0.297
15.0252	0.3315	15.0253	0.0923	15.0253	0.3033	15.0252	0.03735	15.025	0.29805
15.0335	0.33455	15.0337	0.0952	15.0337	0.3048	15.0335	0.03705	15.0333	0.2997
15.0418	0.3325	15.042	0.09195	15.042	0.3029	15.0418	0.03375	15.0417	0.2954
15.0502	0.33305	15.0503	0.09455	15.0503	0.30555	15.0502	0.0331	15.05	0.29785
15.0585	0.3332	15.0587	0.09655	15.0587	0.30535	15.0585	0.03305	15.0583	0.2979
15.0668	0.3367	15.067	0.09875	15.067	0.30585	15.0668	0.03255	15.0667	0.29945
15.0752	0.33815	15.0753	0.10135	15.0753	0.3064	15.0752	0.03205	15.075	0.2968
15.0835	0.33915	15.0837	0.10515	15.0837	0.30655	15.0835	0.0317	15.0833	0.2976
15.0918	0.34375	15.092	0.1107	15.092	0.3091	15.0918	0.03305	15.0917	0.29905
15.1002	0.3484	15.1003	0.11885	15.1003	0.31105	15.1002	0.03345	15.1	0.29935
15.1085	0.35225	15.1087	0.1268	15.1087	0.3125	15.1085	0.0346	15.1083	0.2986
15.1168	0.35965	15.117	0.1367	15.117	0.31635	15.1168	0.036	15.1167	0.2995
15.1252	0.3668	15.1253	0.1476	15.1253	0.3196	15.1252	0.03685	15.125	0.2991
15.1335	0.3764	15.1337	0.16375	15.1337	0.3245	15.1335	0.0396	15.1333	0.2988
15.1418	0.38725	15.142	0.18105	15.142	0.3313	15.1418	0.04205	15.1417	0.2988
15.1502	0.40365	15.1503	0.20325	15.1503	0.3377	15.1502	0.0473	15.15	0.29865
15.1585	0.4212	15.1587	0.22865	15.1587	0.3481	15.1585	0.0521	15.1583	0.29645
15.1668	0.4419	15.167	0.25795	15.167	0.3592	15.1668	0.05835	15.1667	0.29355
15.1752	0.46685	15.1753	0.29125	15.1753	0.3731	15.1752	0.0638	15.175	0.29345
15.1835	0.4966	15.1837	0.32835	15.1837	0.3913	15.1835	0.07415	15.1833	0.2944
15.1918	0.53065	15.192	0.37205	15.192	0.4142	15.1918	0.0871	15.1917	0.2961
15.2002	0.5708	15.2003	0.4239	15.2003	0.44	15.2002	0.10225	15.2	0.2957
15.2085	0.61425	15.2087	0.47645	15.2087	0.4676	15.2085	0.1202	15.2083	0.2972
15.2168	0.66275	15.217	0.5362	15.217	0.50245	15.2168	0.1405	15.2167	0.299
15.2252	0.71415	15.2253	0.59835	15.2253	0.53775	15.2252	0.1628	15.225	0.29975
15.2335	0.773	15.2337	0.66425	15.2337	0.58135	15.2335	0.192	15.2333	0.30145
15.2418	0.83605	15.242	0.7355	15.242	0.628	15.2418	0.2234	15.2417	0.3046
15.2502	0.90455	15.2503	0.80965	15.2503	0.68275	15.2502	0.2624	15.25	0.30845
15.2585	0.97425	15.2587	0.88505	15.2587	0.73975	15.2585	0.30675	15.2583	0.31185
15.2668	1.0469	15.267	0.96265	15.267	0.80175	15.2668	0.3536	15.2667	0.31695
15.2752	1.12315	15.2753	1.04245	15.2753	0.8682	15.2752	0.40545	15.275	0.3246
15.2835	1.2018	15.2837	1.12135	15.2837	0.9387	15.2835	0.4641	15.2833	0.33215
15.2918	1.27635	15.292	1.1977	15.292	1.01045	15.2918	0.5221	15.2917	0.34065
15.3002	1.35535	15.3003	1.2723	15.3003	1.08725	15.3002	0.5872	15.3	0.35325
15.3085	1.432	15.3087	1.3459	15.3087	1.1644	15.3085	0.6556	15.3083	0.3682
15.3168	1.50585	15.317	1.41465	15.317	1.24095	15.3168	0.72765	15.3167	0.3873
15.3252	1.5776	15.3253	1.48005	15.3253	1.3179	15.3252	0.80305	15.325	0.4082
15.3335	1.6473	15.3337	1.5412	15.3337	1.39545	15.3335	0.8779	15.3333	0.43485
15.3418	1.714	15.342	1.59755	15.342	1.4691	15.3418	0.95395	15.3417	0.4637
15.3502	1.77585	15.3503	1.6485	15.3503	1.5409	15.3502	1.0292	15.35	0.49695
15.3585	1.832	15.3587	1.69415	15.3587	1.6084	15.3585	1.1024	15.3583	0.53485
15.3668	1.88405	15.367	1.73225	15.367	1.6729	15.3668	1.1768	15.3667	0.57765
15.3752	1.93015	15.3753	1.7672	15.3753	1.73445	15.3752	1.247	15.375	0.62685
15.3835	1.9717	15.3837	1.79495	15.3837	1.7917	15.3835	1.31105	15.3833	0.67945
15.3918	2.00815	15.392	1.81715	15.392	1.8455	15.3918	1.3754	15.3917	0.7377
15.4002	2.03985	15.4003	1.83725	15.4003	1.8936	15.4002	1.43265	15.4	0.79965
15.4085	2.0633	15.4087	1.8491	15.4087	1.9348	15.4085	1.48645	15.4083	0.86575
15.4168	2.08135	15.417	1.85495	15.417	1.9702	15.4168	1.53755	15.4167	0.93455
15.4252	2.0943	15.4253	1.8548	15.4253	2	15.4252	1.5804	15.425	1.0069
15.4335	2.09975	15.4337	1.84795	15.4337	2.025	15.4335	1.6204	15.4333	1.0821
15.4418	2.10115	15.442	1.837	15.442	2.04335	15.4418	1.65415	15.4417	1.15735
15.4502	2.09885	15.4503	1.818	15.4503	2.0586	15.4502	1.6861	15.45	1.2325
15.4585	2.08595	15.4587	1.79455	15.4587	2.06455	15.4585	1.70805	15.4583	1.30905
15.4668	2.0724	15.467	1.7677	15.467	2.06775	15.4668	1.7285	15.4667	1.3848
15.4752	2.04915	15.4753	1.72945	15.4753	2.0619	15.4752	1.7406	15.475	1.4567
15.4835	2.0225	15.4837	1.6862	15.4837	2.0545	15.4835	1.75095	15.4833	1.52675
15.4918	1.9857	15.492	1.63775	15.492	2.036	15.4918	1.7541	15.4917	1.59395
15.5002	1.94595	15.5003	1.58475	15.5003	2.0144	15.5002	1.75385	15.5	1.6586
15.5085	1.89875	15.5087	1.52585	15.5087	1.98605	15.5085	1.74745	15.5083	1.71665
15.5168	1.84765	15.517	1.4627	15.517	1.95315	15.5168	1.7329	15.5167	1.7718
15.5252	1.7929	15.5253	1.39635	15.5253	1.9131	15.5252	1.7163	15.525	1.82505
15.5335	1.7307	15.5337	1.32615	15.5337	1.8651	15.5335	1.6905	15.5333	1.86995
15.5418	1.666	15.542	1.2546	15.542	1.81325	15.5418	1.6591	15.5417	1.9084
15.5502	1.5953	15.5503	1.1782	15.5503	1.75325	15.5502	1.6202	15.55	1.9422
15.5585	1.5247	15.5587	1.10635	15.5587	1.69575	15.5585	1.5804	15.5583	1.9738
15.5668	1.4508	15.567	1.03035	15.567	1.6301	15.5668	1.53065	15.5667	2.00035
15.5752	1.3752	15.5753	0.9571	15.5753	1.5614	15.5752	1.47595	15.575	2.02015
15.5835	1.30015	15.5837	0.8864	15.5837	1.4914	15.5835	1.41755	15.5833	2.03525
15.5918	1.22675	15.592	0.81735	15.592	1.4194	15.5918	1.35355	15.5917	2.04345
15.6002	1.15325	15.6003	0.7517	15.6003	1.34545	15.6002	1.2865	15.6	2.04665
15.6085	1.0827	15.6087	0.68985	15.6087	1.27105	15.6085	1.2174	15.6083	2.0456
15.6168	1.0148	15.617	0.6284	15.617	1.197	15.6168	1.14575	15.6167	2.03615
15.6252	0.9501	15.6253	0.5758	15.6253	1.1258	15.6252	1.07245	15.625	2.02365
15.6335	0.8904	15.6337	0.52645	15.6337	1.0562	15.6335	0.9994	15.6333	2.006
15.6418	0.83295	15.642	0.4809	15.642	0.9893	15.6418	0.92645	15.6417	1.9802
15.6502	0.782	15.6503	0.44115	15.6503	0.9263	15.6502	0.8545	15.65	1.95055
15.6585	0.7361	15.6587	0.4048	15.6587	0.86735	15.6585	0.78465	15.6583	1.9124
15.6668	0.69065	15.667	0.3714	15.667	0.81275	15.6668	0.71715	15.6667	1.8661
15.6752	0.65185	15.6753	0.34115	15.6753	0.7618	15.6752	0.654	15.675	1.81775
15.6835	0.61675	15.6837	0.31425	15.6837	0.7162	15.6835	0.59415	15.6833	1.7633
15.6918	0.5865	15.692	0.29265	15.692	0.6731	15.6918	0.53935	15.6917	1.7044
15.7002	0.5586	15.7003	0.27085	15.7003	0.63645	15.7002	0.48545	15.7	1.6391
15.7085	0.53325	15.7087	0.25215	15.7087	0.6	15.7085	0.43565	15.7083	1.5699
15.7168	0.5158	15.717	0.241	15.717	0.5709	15.7168	0.39425	15.7167	1.50225
15.7252	0.4959	15.7253	0.2246	15.7253	0.54305	15.7252	0.35235	15.725	1.42925
15.7335	0.47815	15.7337	0.21115	15.7337	0.5184	15.7335	0.3163	15.7333	1.35475
15.7418	0.464	15.742	0.1989	15.742	0.49695	15.7418	0.28235	15.7417	1.27835
15.7502	0.4532	15.7503	0.1908	15.7503	0.4793	15.7502	0.25445	15.75	1.20805
15.7585	0.4434	15.7587	0.18355	15.7587	0.4653	15.7585	0.22945	15.7583	1.13565
15.7668	0.43455	15.767	0.1773	15.767	0.45155	15.7668	0.20765	15.7667	1.0649
15.7752	0.42615	15.7753	0.17085	15.7753	0.4389	15.7752	0.1864	15.775	0.9962
15.7835	0.41985	15.7837	0.16565	15.7837	0.4273	15.7835	0.16755	15.7833	0.9325
15.7918	0.4127	15.792	0.15915	15.792	0.4176	15.7918	0.15015	15.7917	0.87095
15.8002	0.40675	15.8003	0.1549	15.8003	0.4088	15.8002	0.1365	15.8	0.8136
15.8085	0.4026	15.8087	0.15235	15.8087	0.40295	15.8085	0.12425	15.8083	0.762
15.8168	0.39655	15.817	0.14685	15.817	0.3944	15.8168	0.1142	15.8167	0.71185
15.8252	0.39205	15.8253	0.14235	15.8253	0.38935	15.8252	0.1057	15.825	0.6672
15.8335	0.38725	15.8337	0.14015	15.8337	0.3854	15.8335	0.0978	15.8333	0.62855
15.8418	0.38435	15.842	0.13985	15.842	0.37905	15.8418	0.0886	15.8417	0.59155
15.8502	0.3823	15.8503	0.1369	15.8503	0.37655	15.8502	0.0848	15.85	0.5607
15.8585	0.3802	15.8587	0.1353	15.8587	0.37165	15.8585	0.07815	15.8583	0.53235
15.8668	0.3771	15.867	0.13455	15.867	0.3674	15.8668	0.0729	15.8667	0.507
15.8752	0.37525	15.8753	0.13125	15.8753	0.3643	15.8752	0.0697	15.875	0.48385
15.8835	0.37445	15.8837	0.1314	15.8837	0.36125	15.8835	0.06835	15.8833	0.46495
15.8918	0.37225	15.892	0.1283	15.892	0.36105	15.8918	0.0636	15.8917	0.4477
15.9002	0.37285	15.9003	0.12885	15.9003	0.357	15.9002	0.06265	15.9	0.4342
15.9085	0.37125	15.9087	0.1276	15.9087	0.35415	15.9085	0.05975	15.9083	0.4199
15.9168	0.37095	15.917	0.12685	15.917	0.35335	15.9168	0.05725	15.9167	0.40855
15.9252	0.3695	15.9253	0.12455	15.9253	0.3507	15.9252	0.0558	15.925	0.399
15.9335	0.36875	15.9337	0.1238	15.9337	0.351	15.9335	0.0547	15.9333	0.39205
15.9418	0.3681	15.942	0.12385	15.942	0.349	15.9418	0.0534	15.9417	0.3848
15.9502	0.3672	15.9503	0.12095	15.9503	0.3471	15.9502	0.0519	15.95	0.37675
15.9585	0.36515	15.9587	0.121	15.9587	0.34695	15.9585	0.051	15.9583	0.3706
15.9668	0.36395	15.967	0.1194	15.967	0.3439	15.9668	0.04835	15.9667	0.36605
15.9752	0.36055	15.9753	0.1172	15.9753	0.34265	15.9752	0.0437	15.975	0.35935
15.9835	0.36145	15.9837	0.1177	15.9837	0.3426	15.9835	0.04535	15.9833	0.35675
15.9918	0.3586	15.992	0.11575	15.992	0.343	15.9918	0.044	15.9917	0.35385
16.0002	0.3581	16.0003	0.11325	16.0003	0.3402	16.0002	0.04165	16	0.35055
16.0085	0.358	16.0087	0.1127	16.0087	0.34005	16.0085	0.04345	16.0083	0.34765
16.0168	0.35715	16.017	0.1128	16.017	0.33865	16.0168	0.0414	16.0167	0.3461
16.0252	0.35485	16.0253	0.1115	16.0253	0.3359	16.0252	0.0385	16.025	0.3419
16.0335	0.35365	16.0337	0.1104	16.0337	0.33385	16.0335	0.0371	16.0333	0.33885
16.0418	0.355	16.042	0.11265	16.042	0.33545	16.0418	0.0398	16.0417	0.34
16.0502	0.35425	16.0503	0.11225	16.0503	0.33435	16.0502	0.03775	16.05	0.33705
16.0585	0.3553	16.0587	0.1141	16.0587	0.3348	16.0585	0.0415	16.0583	0.33715
16.0668	0.35265	16.067	0.11395	16.067	0.33345	16.0668	0.0387	16.0667	0.33415
16.0752	0.3537	16.0753	0.1143	16.0753	0.33325	16.0752	0.04085	16.075	0.3336
16.0835	0.3537	16.0837	0.1143	16.0837	0.33285	16.0835	0.0405	16.0833	0.3314
16.0918	0.35285	16.092	0.1128	16.092	0.3311	16.0918	0.0403	16.0917	0.33255
16.1002	0.3526	16.1003	0.111	16.1003	0.3309	16.1002	0.03965	16.1	0.32945
16.1085	0.3537	16.1087	0.1108	16.1087	0.32985	16.1085	0.04065	16.1083	0.3279
16.1168	0.35345	16.117	0.11195	16.117	0.33205	16.1168	0.0408	16.1167	0.32755
16.1252	0.3544	16.1253	0.1109	16.1253	0.3312	16.1252	0.04055	16.125	0.3262
16.1335	0.3544	16.1337	0.11255	16.1337	0.3332	16.1335	0.04055	16.1333	0.3249
16.1418	0.3522	16.142	0.10955	16.142	0.33265	16.1418	0.03935	16.1417	0.3233
16.1502	0.3517	16.1503	0.10945	16.1503	0.3322	16.1502	0.039	16.15	0.32125
16.1585	0.35395	16.1587	0.1109	16.1587	0.33245	16.1585	0.0399	16.1583	0.322
16.1668	0.3538	16.167	0.1096	16.167	0.3325	16.1668	0.03975	16.1667	0.3203
16.1752	0.3491	16.1753	0.1065	16.1753	0.3298	16.1752	0.03695	16.175	0.31565
16.1835	0.34895	16.1837	0.10565	16.1837	0.3312	16.1835	0.03655	16.1833	0.3159
16.1918	0.35015	16.192	0.1071	16.192	0.3297	16.1918	0.03855	16.1917	0.31545
16.2002	0.34825	16.2003	0.10565	16.2003	0.3285	16.2002	0.038	16.2	0.31455
16.2085	0.3477	16.2087	0.10535	16.2087	0.32915	16.2085	0.03705	16.2083	0.31295
16.2168	0.34765	16.217	0.1061	16.217	0.32835	16.2168	0.0366	16.2167	0.3121
16.2252	0.34935	16.2253	0.10725	16.2253	0.33125	16.2252	0.03765	16.225	0.3131
16.2335	0.3485	16.2337	0.1051	16.2337	0.3282	16.2335	0.0371	16.2333	0.3118
16.2418	0.3478	16.242	0.10755	16.242	0.3301	16.2418	0.037	16.2417	0.3112
16.2502	0.34945	16.2503	0.1073	16.2503	0.3305	16.2502	0.0393	16.25	0.31235
16.2585	0.3498	16.2587	0.10755	16.2587	0.3312	16.2585	0.03965	16.2583	0.31115
16.2668	0.34965	16.267	0.1081	16.267	0.33115	16.2668	0.0405	16.2667	0.31165
16.2752	0.3511	16.2753	0.10755	16.2753	0.3321	16.2752	0.04165	16.275	0.312
16.2835	0.35185	16.2837	0.10825	16.2837	0.3319	16.2835	0.04165	16.2833	0.311
16.2918	0.35155	16.292	0.1085	16.292	0.33135	16.2918	0.0424	16.2917	0.3093
16.3002	0.3518	16.3003	0.1058	16.3003	0.3326	16.3002	0.0424	16.3	0.30955
16.3085	0.3522	16.3087	0.10645	16.3087	0.33235	16.3085	0.0425	16.3083	0.30975
16.3168	0.35225	16.317	0.10555	16.317	0.33325	16.3168	0.042	16.3167	0.31045
16.3252	0.35275	16.3253	0.1068	16.3253	0.3334	16.3252	0.04315	16.325	0.30885
16.3335	0.3521	16.3337	0.1061	16.3337	0.33365	16.3335	0.0425	16.3333	0.3076
16.3418	0.3517	16.342	0.10665	16.342	0.3336	16.3418	0.04255	16.3417	0.30715
16.3502	0.3527	16.3503	0.1071	16.3503	0.3334	16.3502	0.0416	16.35	0.30765
16.3585	0.3517	16.3587	0.10605	16.3587	0.33385	16.3585	0.0413	16.3583	0.3069
16.3668	0.3515	16.367	0.10535	16.367	0.33435	16.3668	0.0413	16.3667	0.30615
16.3752	0.35095	16.3753	0.1063	16.3753	0.3324	16.3752	0.04195	16.375	0.3054
16.3835	0.35475	16.3837	0.10775	16.3837	0.3361	16.3835	0.04295	16.3833	0.3076
16.3918	0.35245	16.392	0.108	16.392	0.33525	16.3918	0.0427	16.3917	0.30685
16.4002	0.35355	16.4003	0.10925	16.4003	0.3352	16.4002	0.04215	16.4	0.3066
16.4085	0.3556	16.4087	0.10985	16.4087	0.3363	16.4085	0.0433	16.4083	0.3057
16.4168	0.35335	16.417	0.10935	16.417	0.33505	16.4168	0.0405	16.4167	0.3045
16.4252	0.35545	16.4253	0.11195	16.4253	0.33805	16.4252	0.04435	16.425	0.30635
16.4335	0.35685	16.4337	0.11335	16.4337	0.33875	16.4335	0.046	16.4333	0.30675
16.4418	0.35845	16.442	0.11545	16.442	0.33885	16.4418	0.04735	16.4417	0.30675
16.4502	0.35725	16.4503	0.11555	16.4503	0.34155	16.4502	0.04795	16.45	0.30605
16.4585	0.36075	16.4587	0.1175	16.4587	0.34315	16.4585	0.0507	16.4583	0.30835
16.4668	0.36185	16.467	0.11925	16.467	0.34385	16.4668	0.0509	16.4667	0.308
16.4752	0.36465	16.4753	0.1201	16.4753	0.34615	16.4752	0.0543	16.475	0.3091
16.4835	0.36245	16.4837	0.1198	16.4837	0.34445	16.4835	0.05305	16.4833	0.3066
16.4918	0.36445	16.492	0.11975	16.492	0.3448	16.4918	0.05245	16.4917	0.30585
16.5002	0.36635	16.5003	0.1216	16.5003	0.34745	16.5002	0.056	16.5	0.3077
16.5085	0.3662	16.5087	0.12175	16.5087	0.3506	16.5085	0.0575	16.5083	0.30885
16.5168	0.36635	16.517	0.1205	16.517	0.3486	16.5168	0.0567	16.5167	0.30735
16.5252	0.36625	16.5253	0.11945	16.5253	0.3504	16.5252	0.05785	16.525	0.3094
16.5335	0.36505	16.5337	0.1198	16.5337	0.35055	16.5335	0.0598	16.5333	0.3066
16.5418	0.3647	16.542	0.118	16.542	0.35095	16.5418	0.0589	16.5417	0.3087
16.5502	0.36295	16.5503	0.11725	16.5503	0.3494	16.5502	0.05795	16.55	0.3081
16.5585	0.362	16.5587	0.11615	16.5587	0.3498	16.5585	0.05885	16.5583	0.30995
16.5668	0.36	16.567	0.1136	16.567	0.34875	16.5668	0.05865	16.5667	0.3089
16.5752	0.35635	16.5753	0.1116	16.5753	0.34745	16.5752	0.05775	16.575	0.3088
16.5835	0.35645	16.5837	0.1107	16.5837	0.34765	16.5835	0.05765	16.5833	0.311
16.5918	0.35735	16.592	0.1118	16.592	0.34795	16.5918	0.05985	16.5917	0.31295
16.6002	0.3547	16.6003	0.1119	16.6003	0.34695	16.6002	0.0604	16.6	0.3145
16.6085	0.35455	16.6087	0.11095	16.6087	0.34585	16.6085	0.05985	16.6083	0.3158
16.6168	0.35175	16.617	0.109	16.617	0.3441	16.6168	0.06035	16.6167	0.3161
16.6252	0.3501	16.6253	0.10825	16.6253	0.3424	16.6252	0.05995	16.625	0.31795
16.6335	0.34975	16.6337	0.10855	16.6337	0.34175	16.6335	0.0598	16.6333	0.31925
[truncated: 4,604 more rows]
