# Supplementary material for: A moonlighting function of a chitin polysaccharide monooxygenase, CWR-1, in Neurospora crassa allorecognition
Source: eLife. 2022 Aug 30;11:e80459. doi: 10.7554/eLife.80459 (PMC9550227; doi:10.7554/eLife.80459)
Supplement: Figure 1—source data 1. — Blank subtracted HPAEC-PAD traces. The samples were prepared as described in ‘Materials and methods'. The time and nC response are listed in the table. [file elife-80459-fig1-data1.xlsx]

## Sheet: Sheet1
Figure 1E Source Data (β-Chitin HG1)
HG1 + β-Chitin+ Asc.		HG1+β-Chitin		β-Chitin + Asc.		β-Chitin
time	nC	time	nC	time	nC	time	nC
0.000333	-0.2805	0	-0.37955	0.000333	0.0286	0.000167	-0.077
0.008667	-0.28465	0.008333	-0.3772	0.008667	0.02205	0.0085	-0.0926
0.017	-0.2894	0.016667	-0.3753	0.017	0.03635	0.016833	-0.0901
0.025333	-0.28355	0.025	-0.3729	0.025333	0.0434	0.025167	-0.087
0.033667	-0.28185	0.033333	-0.37305	0.033667	0.0474	0.0335	-0.08515
0.042	-0.27955	0.041667	-0.37385	0.042	0.0493	0.041833	-0.08385
0.050333	-0.2793	0.05	-0.3744	0.050333	0.0522	0.050167	-0.082
0.058667	-0.27785	0.058333	-0.37395	0.058667	0.0519	0.0585	-0.08045
0.067	-0.2785	0.066667	-0.37815	0.067	0.05105	0.066833	-0.0807
0.075333	-0.27945	0.075	-0.3787	0.075333	0.05015	0.075167	-0.0808
0.083667	-0.28085	0.083333	-0.38235	0.083667	0.0476	0.0835	-0.08195
0.092	-0.28005	0.091667	-0.3835	0.092	0.0496	0.091833	-0.08135
0.100333	-0.27755	0.1	-0.3844	0.100333	0.04945	0.100167	-0.07885
0.108667	-0.2785	0.108333	-0.386	0.108667	0.0474	0.1085	-0.076
0.117	-0.27625	0.116667	-0.38415	0.117	0.0497	0.116833	-0.07375
0.125333	-0.27795	0.125	-0.387	0.125333	0.0468	0.125167	-0.0742
0.133667	-0.277	0.133333	-0.3866	0.133667	0.04625	0.1335	-0.072
0.142	-0.2771	0.141667	-0.3877	0.142	0.0434	0.141833	-0.07215
0.150333	-0.27645	0.15	-0.38725	0.150333	0.0435	0.150167	-0.07115
0.158667	-0.27535	0.158333	-0.3851	0.158667	0.0441	0.1585	-0.0696
0.167	-0.2723	0.166667	-0.3846	0.167	0.04485	0.166833	-0.0692
0.175333	-0.27195	0.175	-0.38485	0.175333	0.04415	0.175167	-0.06995
0.183667	-0.2718	0.183333	-0.3864	0.183667	0.0429	0.1835	-0.07305
0.192	-0.2722	0.191667	-0.3863	0.192	0.04325	0.191833	-0.07285
0.200333	-0.27195	0.2	-0.38725	0.200333	0.0435	0.200167	-0.0743
0.208667	-0.27455	0.208333	-0.38645	0.208667	0.0434	0.2085	-0.0755
0.217	-0.2733	0.216667	-0.386	0.217	0.04485	0.216833	-0.07565
0.225333	-0.271	0.225	-0.38635	0.225333	0.046	0.225167	-0.07515
0.233667	-0.27175	0.233333	-0.3851	0.233667	0.0486	0.2335	-0.0746
0.242	-0.2718	0.241667	-0.38495	0.242	0.0466	0.241833	-0.075
0.250333	-0.271	0.25	-0.3863	0.250333	0.04955	0.250167	-0.0745
0.258667	-0.2701	0.258333	-0.3864	0.258667	0.0481	0.2585	-0.0743
0.267	-0.2714	0.266667	-0.38715	0.267	0.04735	0.266833	-0.07425
0.275333	-0.27085	0.275	-0.38665	0.275333	0.0479	0.275167	-0.07355
0.283667	-0.2707	0.283333	-0.3877	0.283667	0.04845	0.2835	-0.0719
0.292	-0.26815	0.291667	-0.3862	0.292	0.0491	0.291833	-0.0686
0.300333	-0.2688	0.3	-0.38805	0.300333	0.0482	0.300167	-0.0683
0.308667	-0.26805	0.308333	-0.38615	0.308667	0.0477	0.3085	-0.0685
0.317	-0.2693	0.316667	-0.3884	0.317	0.046	0.316833	-0.0698
0.325333	-0.2668	0.325	-0.38695	0.325333	0.04505	0.325167	-0.06815
0.333667	-0.2669	0.333333	-0.38665	0.333667	0.0445	0.3335	-0.06865
0.342	-0.26835	0.341667	-0.3872	0.342	0.04295	0.341833	-0.07055
0.350333	-0.2671	0.35	-0.38705	0.350333	0.04345	0.350167	-0.071
0.358667	-0.2655	0.358333	-0.38575	0.358667	0.0445	0.3585	-0.06865
0.367	-0.26635	0.366667	-0.3856	0.367	0.0434	0.366833	-0.07075
0.375333	-0.2667	0.375	-0.38525	0.375333	0.04265	0.375167	-0.07295
0.383667	-0.2637	0.383333	-0.3838	0.383667	0.04495	0.3835	-0.0695
0.392	-0.26395	0.391667	-0.38465	0.392	0.04245	0.391833	-0.072
0.400333	-0.26685	0.4	-0.38515	0.400333	0.0417	0.400167	-0.07195
0.408667	-0.2652	0.408333	-0.3846	0.408667	0.04345	0.4085	-0.07165
0.417	-0.26425	0.416667	-0.38235	0.417	0.04605	0.416833	-0.0694
0.425333	-0.2639	0.425	-0.38135	0.425333	0.047	0.425167	-0.06925
0.433667	-0.2637	0.433333	-0.3807	0.433667	0.0465	0.4335	-0.0681
0.442	-0.2649	0.441667	-0.3811	0.442	0.0468	0.441833	-0.0681
0.450333	-0.26445	0.45	-0.3822	0.450333	0.04515	0.450167	-0.06745
0.458667	-0.26415	0.458333	-0.38175	0.458667	0.0454	0.4585	-0.06885
0.467	-0.263	0.466667	-0.38225	0.467	0.0475	0.466833	-0.0652
0.475333	-0.2625	0.475	-0.3822	0.475333	0.0482	0.475167	-0.0641
0.483667	-0.2609	0.483333	-0.3799	0.483667	0.04915	0.4835	-0.0611
0.492	-0.26115	0.491667	-0.3822	0.492	0.0473	0.491833	-0.06
0.500333	-0.259	0.5	-0.37975	0.500333	0.04765	0.500167	-0.063
0.508667	-0.25675	0.508333	-0.37995	0.508667	0.04715	0.5085	-0.05915
0.517	-0.2589	0.516667	-0.38285	0.517	0.04375	0.516833	-0.06215
0.525333	-0.25935	0.525	-0.38165	0.525333	0.04305	0.525167	-0.0622
0.533667	-0.2615	0.533333	-0.3827	0.533667	0.03985	0.5335	-0.0643
0.542	-0.2585	0.541667	-0.3824	0.542	0.04125	0.541833	-0.062
0.550333	-0.25845	0.55	-0.38125	0.550333	0.043	0.550167	-0.0624
0.558667	-0.259	0.558333	-0.3799	0.558667	0.0426	0.5585	-0.0649
0.567	-0.25865	0.566667	-0.3826	0.567	0.0418	0.566833	-0.064
0.575333	-0.25775	0.575	-0.3823	0.575333	0.04295	0.575167	-0.06435
0.583667	-0.25675	0.583333	-0.3803	0.583667	0.04345	0.5835	-0.0644
0.592	-0.25815	0.591667	-0.3785	0.592	0.04325	0.591833	-0.0632
0.600333	-0.25625	0.6	-0.3775	0.600333	0.0455	0.600167	-0.06305
0.608667	-0.25745	0.608333	-0.37845	0.608667	0.04495	0.6085	-0.06135
0.617	-0.25645	0.616667	-0.3771	0.617	0.0465	0.616833	-0.06175
0.625333	-0.25515	0.625	-0.37935	0.625333	0.0471	0.625167	-0.0598
0.633667	-0.2562	0.633333	-0.38085	0.633667	0.0439	0.6335	-0.0609
0.642	-0.25545	0.641667	-0.38085	0.642	0.0444	0.641833	-0.06005
0.650333	-0.25435	0.65	-0.3807	0.650333	0.045	0.650167	-0.06045
0.658667	-0.25465	0.658333	-0.3806	0.658667	0.04515	0.6585	-0.0563
0.667	-0.25305	0.666667	-0.37965	0.667	0.0459	0.666833	-0.05585
0.675333	-0.2531	0.675	-0.37855	0.675333	0.04755	0.675167	-0.0549
0.683667	-0.25215	0.683333	-0.3777	0.683667	0.04755	0.6835	-0.05525
0.692	-0.2523	0.691667	-0.3787	0.692	0.0451	0.691833	-0.05575
0.700333	-0.2531	0.7	-0.37935	0.700333	0.04415	0.700167	-0.0549
0.708667	-0.25045	0.708333	-0.37855	0.708667	0.0442	0.7085	-0.05395
0.717	-0.2525	0.716667	-0.37935	0.717	0.04185	0.716833	-0.0531
0.725333	-0.2517	0.725	-0.3784	0.725333	0.0417	0.725167	-0.0537
0.733667	-0.2506	0.733333	-0.37615	0.733667	0.0426	0.7335	-0.0506
0.742	-0.2515	0.741667	-0.3771	0.742	0.0423	0.741833	-0.0546
0.750333	-0.2503	0.75	-0.37675	0.750333	0.04165	0.750167	-0.0551
0.758667	-0.25105	0.758333	-0.37845	0.758667	0.04185	0.7585	-0.0553
0.767	-0.25015	0.766667	-0.37745	0.767	0.0411	0.766833	-0.0547
0.775333	-0.25235	0.775	-0.37735	0.775333	0.04105	0.775167	-0.05645
0.783667	-0.25245	0.783333	-0.37655	0.783667	0.0411	0.7835	-0.05505
0.792	-0.2505	0.791667	-0.375	0.792	0.0434	0.791833	-0.05425
0.800333	-0.25085	0.8	-0.37325	0.800333	0.0443	0.800167	-0.0528
0.808667	-0.25085	0.808333	-0.3753	0.808667	0.045	0.8085	-0.0531
0.817	-0.2489	0.816667	-0.37595	0.817	0.04515	0.816833	-0.05155
0.825333	-0.24875	0.825	-0.3751	0.825333	0.0442	0.825167	-0.05055
0.833667	-0.24995	0.833333	-0.3763	0.833667	0.0433	0.8335	-0.04975
0.842	-0.248	0.841667	-0.3769	0.842	0.04535	0.841833	-0.0478
0.850333	-0.24855	0.85	-0.3748	0.850333	0.0439	0.850167	-0.0483
0.858667	-0.24635	0.858333	-0.3742	0.858667	0.0461	0.8585	-0.04485
0.867	-0.2467	0.866667	-0.37605	0.867	0.045	0.866833	-0.0457
0.875333	-0.2482	0.875	-0.3767	0.875333	0.04515	0.875167	-0.0489
0.883667	-0.24655	0.883333	-0.3742	0.883667	0.044	0.8835	-0.04615
0.892	-0.2462	0.891667	-0.3753	0.892	0.0444	0.891833	-0.0457
0.900333	-0.2458	0.9	-0.37545	0.900333	0.04335	0.900167	-0.0452
0.908667	-0.24795	0.908333	-0.3748	0.908667	0.0427	0.9085	-0.0461
0.917	-0.24715	0.916667	-0.3733	0.917	0.04265	0.916833	-0.0441
0.925333	-0.24635	0.925	-0.3733	0.925333	0.04305	0.925167	-0.0449
0.933667	-0.24745	0.933333	-0.3746	0.933667	0.041	0.9335	-0.04865
0.942	-0.24655	0.941667	-0.37395	0.942	0.0428	0.941833	-0.04835
0.950333	-0.2471	0.95	-0.3762	0.950333	0.0411	0.950167	-0.0504
0.958667	-0.2459	0.958333	-0.37395	0.958667	0.0421	0.9585	-0.0488
0.967	-0.24595	0.966667	-0.37405	0.967	0.0433	0.966833	-0.0487
0.975333	-0.24725	0.975	-0.37295	0.975333	0.04385	0.975167	-0.04735
0.983667	-0.2464	0.983333	-0.3726	0.983667	0.0451	0.9835	-0.04655
0.992	-0.24775	0.991667	-0.37315	0.992	0.04345	0.991833	-0.0463
1.00033	-0.2472	1	-0.3732	1.00033	0.04705	1.00017	-0.04545
1.00867	-0.2459	1.00833	-0.37195	1.00867	0.045	1.0085	-0.0428
1.017	-0.248	1.01667	-0.375	1.017	0.04295	1.01683	-0.04635
1.02533	-0.2475	1.025	-0.37485	1.02533	0.0435	1.02517	-0.04455
1.03367	-0.2479	1.03333	-0.37575	1.03367	0.0438	1.0335	-0.04605
1.042	-0.24815	1.04167	-0.37505	1.042	0.0428	1.04183	-0.04205
1.05033	-0.24715	1.05	-0.37475	1.05033	0.0439	1.05017	-0.0414
1.05867	-0.24755	1.05833	-0.3757	1.05867	0.04295	1.0585	-0.04525
1.067	-0.24825	1.06667	-0.3769	1.067	0.04345	1.06683	-0.0451
1.07533	-0.24525	1.075	-0.3743	1.07533	0.0414	1.07517	-0.0438
1.08367	-0.24745	1.08333	-0.3763	1.08367	0.039	1.0835	-0.04375
1.092	-0.24825	1.09167	-0.37615	1.092	0.0386	1.09183	-0.0434
1.10033	-0.24745	1.1	-0.37365	1.10033	0.03995	1.10017	-0.0423
1.10867	-0.24505	1.10833	-0.37215	1.10867	0.0418	1.1085	-0.0406
1.117	-0.2463	1.11667	-0.3712	1.117	0.04125	1.11683	-0.0415
1.12533	-0.24575	1.125	-0.37175	1.12533	0.0409	1.12517	-0.04185
1.13367	-0.2449	1.13333	-0.37415	1.13367	0.04135	1.1335	-0.04285
1.142	-0.24585	1.14167	-0.37335	1.142	0.0412	1.14183	-0.04385
1.15033	-0.2471	1.15	-0.3712	1.15033	0.0409	1.15017	-0.043
1.15867	-0.24575	1.15833	-0.37095	1.15867	0.04055	1.1585	-0.0434
1.167	-0.24615	1.16667	-0.3699	1.167	0.04265	1.16683	-0.0413
1.17533	-0.24605	1.175	-0.36965	1.17533	0.0436	1.17517	-0.042
1.18367	-0.24545	1.18333	-0.3701	1.18367	0.0459	1.1835	-0.04145
1.192	-0.24395	1.19167	-0.37025	1.192	0.0476	1.19183	-0.03895
1.20033	-0.2438	1.2	-0.3698	1.20033	0.04555	1.20017	-0.0389
1.20867	-0.2436	1.20833	-0.37045	1.20867	0.04625	1.2085	-0.03715
1.217	-0.24535	1.21667	-0.3713	1.217	0.04465	1.21683	-0.0379
1.22533	-0.2463	1.225	-0.37165	1.22533	0.0453	1.22517	-0.0385
1.23367	-0.24455	1.23333	-0.3718	1.23367	0.04525	1.2335	-0.03755
1.242	-0.24695	1.24167	-0.37175	1.242	0.0458	1.24183	-0.0363
1.25033	-0.2434	1.25	-0.3722	1.25033	0.0447	1.25017	-0.03835
1.25867	-0.2442	1.25833	-0.3724	1.25867	0.043	1.2585	-0.03805
1.267	-0.24265	1.26667	-0.3718	1.267	0.04255	1.26683	-0.03775
1.27533	-0.244	1.275	-0.37035	1.27533	0.0423	1.27517	-0.0362
1.28367	-0.24635	1.28333	-0.371	1.28367	0.03965	1.2835	-0.03785
1.292	-0.244	1.29167	-0.3705	1.292	0.04285	1.29183	-0.03645
1.30033	-0.244	1.3	-0.36895	1.30033	0.04105	1.30017	-0.0366
1.30867	-0.24555	1.30833	-0.36995	1.30867	0.04045	1.3085	-0.03795
1.317	-0.24385	1.31667	-0.36995	1.317	0.04065	1.31683	-0.0377
1.32533	-0.2457	1.325	-0.3716	1.32533	0.0393	1.32517	-0.03915
1.33367	-0.24345	1.33333	-0.37265	1.33367	0.0391	1.3335	-0.0403
1.342	-0.2467	1.34167	-0.3696	1.342	0.041	1.34183	-0.0379
1.35033	-0.2442	1.35	-0.3708	1.35033	0.0415	1.35017	-0.0379
1.35867	-0.2445	1.35833	-0.36855	1.35867	0.0441	1.3585	-0.0368
1.367	-0.24495	1.36667	-0.36795	1.367	0.0432	1.36683	-0.03645
1.37533	-0.2447	1.375	-0.36895	1.37533	0.04405	1.37517	-0.0367
1.38367	-0.24345	1.38333	-0.36865	1.38367	0.04585	1.3835	-0.0343
1.392	-0.2433	1.39167	-0.36845	1.392	0.0445	1.39183	-0.03365
1.40033	-0.244	1.4	-0.36895	1.40033	0.04575	1.40017	-0.0333
1.40867	-0.24275	1.40833	-0.36975	1.40867	0.0455	1.4085	-0.03365
1.417	-0.2431	1.41667	-0.37075	1.417	0.0467	1.41683	-0.0317
1.42533	-0.244	1.425	-0.36975	1.42533	0.0463	1.42517	-0.0309
1.43367	-0.2459	1.43333	-0.37245	1.43367	0.0447	1.4335	-0.03425
1.442	-0.24305	1.44167	-0.3706	1.442	0.04615	1.44183	-0.03305
1.45033	-0.2421	1.45	-0.37025	1.45033	0.04415	1.45017	-0.03125
1.45867	-0.2434	1.45833	-0.37065	1.45867	0.04185	1.4585	-0.033
1.467	-0.24525	1.46667	-0.372	1.467	0.04135	1.46683	-0.0349
1.47533	-0.2438	1.475	-0.3708	1.47533	0.04185	1.47517	-0.0326
1.48367	-0.24035	1.48333	-0.3679	1.48367	0.0446	1.4835	-0.029
1.492	-0.242	1.49167	-0.367	1.492	0.0426	1.49183	-0.0335
1.50033	-0.2434	1.5	-0.36955	1.50033	0.0414	1.50017	-0.0342
1.50867	-0.24375	1.50833	-0.37055	1.50867	0.0408	1.5085	-0.0354
1.517	-0.2422	1.51667	-0.3682	1.517	0.0433	1.51683	-0.0319
1.52533	-0.24435	1.525	-0.3703	1.52533	0.042	1.52517	-0.03345
1.53367	-0.2441	1.53333	-0.36885	1.53367	0.04265	1.5335	-0.0329
1.542	-0.24625	1.54167	-0.3689	1.542	0.04225	1.54183	-0.03335
1.55033	-0.2431	1.55	-0.36705	1.55033	0.04655	1.55017	-0.0291
1.55867	-0.245	1.55833	-0.3684	1.55867	0.047	1.5585	-0.0312
1.567	-0.2432	1.56667	-0.36825	1.567	0.0468	1.56683	-0.0304
1.57533	-0.24345	1.575	-0.3702	1.57533	0.0455	1.57517	-0.03065
1.58367	-0.24435	1.58333	-0.3696	1.58367	0.04505	1.5835	-0.02985
1.592	-0.2447	1.59167	-0.37105	1.592	0.04445	1.59183	-0.03115
1.60033	-0.2431	1.6	-0.36855	1.60033	0.04545	1.60017	-0.0284
1.60867	-0.24165	1.60833	-0.3707	1.60867	0.04565	1.6085	-0.0284
1.617	-0.24395	1.61667	-0.37005	1.617	0.04535	1.61683	-0.0307
1.62533	-0.2434	1.625	-0.3708	1.62533	0.0427	1.62517	-0.03235
1.63367	-0.24195	1.63333	-0.36915	1.63367	0.04325	1.6335	-0.029
1.642	-0.2417	1.64167	-0.37105	1.642	0.04205	1.64183	-0.0297
1.65033	-0.24255	1.65	-0.3708	1.65033	0.0416	1.65017	-0.0307
1.65867	-0.2438	1.65833	-0.37165	1.65867	0.0413	1.6585	-0.03075
1.667	-0.24275	1.66667	-0.3688	1.667	0.0418	1.66683	-0.0304
1.67533	-0.2424	1.675	-0.3669	1.67533	0.04385	1.67517	-0.02965
1.68367	-0.2449	1.68333	-0.36965	1.68367	0.04205	1.6835	-0.03375
1.692	-0.24165	1.69167	-0.36865	1.692	0.0426	1.69183	-0.0323
1.70033	-0.24255	1.7	-0.37035	1.70033	0.042	1.70017	-0.03295
1.70867	-0.2437	1.70833	-0.37025	1.70867	0.04145	1.7085	-0.0339
1.717	-0.24435	1.71667	-0.3696	1.717	0.04145	1.71683	-0.0333
1.72533	-0.2447	1.725	-0.36745	1.72533	0.0447	1.72517	-0.03205
1.73367	-0.24485	1.73333	-0.3683	1.73367	0.04485	1.7335	-0.03125
1.742	-0.24475	1.74167	-0.36505	1.742	0.04625	1.74183	-0.02915
1.75033	-0.24345	1.75	-0.36695	1.75033	0.0478	1.75017	-0.02885
1.75867	-0.2446	1.75833	-0.368	1.75867	0.04635	1.7585	-0.0295
1.767	-0.24195	1.76667	-0.3662	1.767	0.0471	1.76683	-0.02725
1.77533	-0.2418	1.775	-0.36725	1.77533	0.0476	1.77517	-0.0275
1.78367	-0.244	1.78333	-0.36885	1.78367	0.0463	1.7835	-0.02835
1.792	-0.2421	1.79167	-0.36745	1.792	0.04765	1.79183	-0.02595
1.80033	-0.2427	1.8	-0.36735	1.80033	0.0492	1.80017	-0.02595
1.80867	-0.24415	1.80833	-0.369	1.80867	0.04725	1.8085	-0.02815
1.817	-0.2437	1.81667	-0.3687	1.817	0.0464	1.81683	-0.02815
1.82533	-0.2447	1.825	-0.36955	1.82533	0.04335	1.82517	-0.0291
1.83367	-0.24605	1.83333	-0.37095	1.83367	0.0429	1.8335	-0.02845
1.842	-0.2467	1.84167	-0.36955	1.842	0.04225	1.84183	-0.0288
1.85033	-0.2471	1.85	-0.3713	1.85033	0.0423	1.85017	-0.02815
1.85867	-0.24325	1.85833	-0.36895	1.85867	0.0434	1.8585	-0.02735
1.867	-0.2456	1.86667	-0.37	1.867	0.0403	1.86683	-0.0309
1.87533	-0.2462	1.875	-0.372	1.87533	0.0408	1.87517	-0.03235
1.88367	-0.24665	1.88333	-0.3731	1.88367	0.04295	1.8835	-0.0324
1.892	-0.24535	1.89167	-0.3701	1.892	0.0428	1.89183	-0.0306
1.90033	-0.2488	1.9	-0.3701	1.90033	0.0417	1.90017	-0.03155
1.90867	-0.2488	1.90833	-0.3707	1.90867	0.0402	1.9085	-0.033
1.917	-0.2477	1.91667	-0.3686	1.917	0.04255	1.91683	-0.03135
1.92533	-0.2476	1.925	-0.36985	1.92533	0.04285	1.92517	-0.0307
1.93367	-0.2469	1.93333	-0.3701	1.93367	0.04315	1.9335	-0.0323
1.942	-0.24685	1.94167	-0.37035	1.942	0.0444	1.94183	-0.0312
1.95033	-0.2472	1.95	-0.3698	1.95033	0.04255	1.95017	-0.0283
1.95867	-0.2482	1.95833	-0.3714	1.95867	0.04415	1.9585	-0.03135
1.967	-0.2489	1.96667	-0.37085	1.967	0.0456	1.96683	-0.02965
1.97533	-0.2488	1.975	-0.37105	1.97533	0.04515	1.97517	-0.0289
1.98367	-0.2472	1.98333	-0.37005	1.98367	0.04585	1.9835	-0.02955
1.992	-0.249	1.99167	-0.3711	1.992	0.04535	1.99183	-0.0306
2.00033	-0.24745	2	-0.37035	2.00033	0.0452	2.00017	-0.03185
2.00867	-0.24755	2.00833	-0.3728	2.00867	0.0435	2.0085	-0.03245
2.017	-0.24795	2.01667	-0.37255	2.017	0.0422	2.01683	-0.0317
2.02533	-0.24995	2.025	-0.375	2.02533	0.04215	2.02517	-0.03255
2.03367	-0.25255	2.03333	-0.3753	2.03367	0.03845	2.0335	-0.03635
2.042	-0.2499	2.04167	-0.3726	2.042	0.04125	2.04183	-0.03015
2.05033	-0.25005	2.05	-0.37315	2.05033	0.03905	2.05017	-0.03295
2.05867	-0.2509	2.05833	-0.3731	2.05867	0.0389	2.0585	-0.0343
2.067	-0.25415	2.06667	-0.3771	2.067	0.03285	2.06683	-0.0383
2.07533	-0.2651	2.075	-0.3862	2.07533	0.018	2.07517	-0.0494
2.08367	-0.28695	2.08333	-0.4086	2.08367	-0.00785	2.0835	-0.0761
2.092	-0.3309	2.09167	-0.45195	2.092	-0.04435	2.09183	-0.11745
2.10033	-0.38165	2.1	-0.50565	2.10033	-0.0782	2.10017	-0.1672
2.10867	-0.43025	2.10833	-0.5521	2.10867	-0.1044	2.1085	-0.2101
2.117	-0.45675	2.11667	-0.58155	2.117	-0.12105	2.11683	-0.23605
2.12533	-0.45535	2.125	-0.5773	2.12533	-0.12735	2.12517	-0.23915
2.13367	-0.4221	2.13333	-0.5473	2.13367	-0.123	2.1335	-0.22255
2.142	-0.3616	2.14167	-0.49575	2.142	-0.0996	2.14183	-0.1869
2.15033	-0.26835	2.15	-0.4213	2.15033	-0.0339	2.15017	-0.117
2.15867	-0.1288	2.15833	-0.30045	2.15867	0.0943	2.1585	0.0175
2.167	0.08485	2.16667	-0.10575	2.167	0.2951	2.16683	0.24665
2.17533	0.43435	2.175	0.2112	2.17533	0.5637	2.17517	0.5806
2.18367	1.14985	2.18333	0.8088	2.18367	0.8725	2.1835	1.0211
2.192	2.891	2.19167	2.24925	2.192	1.1958	2.19183	1.59935
2.20033	6.79555	2.2	5.6229	2.20033	1.50365	2.20017	2.38155
2.20867	14.0429	2.20833	12.1703	2.20867	1.7799	2.2085	3.4507
2.217	25.0331	2.21667	22.3895	2.217	2.0032	2.21683	4.8219
2.22533	38.7056	2.225	35.2981	2.22533	2.15695	2.22517	6.37915
2.23367	52.9385	2.23333	48.621	2.23367	2.2359	2.2335	7.9029
2.242	65.5369	2.24167	59.941	2.242	2.24095	2.24183	9.16435
2.25033	75.0496	2.25	67.7935	2.25033	2.19075	2.25017	10.012
2.25867	80.9402	2.25833	71.8221	2.25867	2.0903	2.2585	10.3954
2.267	83.3922	2.26667	72.365	2.267	1.9641	2.26683	10.358
2.27533	82.9134	2.275	70.1917	2.27533	1.81645	2.27517	9.98155
2.28367	80.1478	2.28333	66.1164	2.28367	1.67015	2.2835	9.3717
2.292	75.7301	2.29167	60.83	2.292	1.5265	2.29183	8.6146
2.30033	70.231	2.3	54.9085	2.30033	1.3937	2.30017	7.78495
2.30867	64.1128	2.30833	48.7724	2.30867	1.27295	2.3085	6.9377
2.317	57.7499	2.31667	42.7216	2.317	1.16635	2.31683	6.1159
2.32533	51.413	2.325	36.9862	2.32533	1.0707	2.32517	5.34695
2.33367	45.3076	2.33333	31.7265	2.33367	0.98855	2.3335	4.6472
2.342	39.564	2.34167	27.0082	2.342	0.91925	2.34183	4.02235
2.35033	34.2957	2.35	22.8736	2.35033	0.8603	2.35017	3.4781
2.35867	29.5474	2.35833	19.3087	2.35867	0.80915	2.3585	3.0109
2.367	25.3534	2.36667	16.2835	2.367	0.7638	2.36683	2.6092
2.37533	21.7022	2.375	13.745	2.37533	0.7266	2.37517	2.2723
2.38367	18.5789	2.38333	11.636	2.38367	0.68945	2.3835	1.98925
2.392	15.9235	2.39167	9.9011	2.392	0.6605	2.39183	1.75745
2.40033	13.6816	2.4	8.47615	2.40033	0.6368	2.40017	1.56785
2.40867	11.8008	2.40833	7.308	2.40867	0.61455	2.4085	1.4112
2.417	10.2431	2.41667	6.35325	2.417	0.5973	2.41683	1.28825
2.42533	8.9485	2.425	5.56655	2.42533	0.5853	2.42517	1.1863
2.43367	7.8637	2.43333	4.90705	2.43367	0.57125	2.4335	1.10245
2.442	6.9643	2.44167	4.3598	2.442	0.56095	2.44183	1.04005
2.45033	6.21445	2.45	3.90515	2.45033	0.55675	2.45017	0.99035
2.45867	5.5818	2.45833	3.5288	2.45867	0.5492	2.4585	0.9521
2.467	5.0543	2.46667	3.21855	2.467	0.5488	2.46683	0.9279
2.47533	4.61255	2.475	2.9592	2.47533	0.55055	2.47517	0.9132
2.48367	4.239	2.48333	2.74265	2.48367	0.55115	2.4835	0.90575
2.492	3.9222	2.49167	2.55725	2.492	0.5512	2.49183	0.9029
2.50033	3.65125	2.5	2.3954	2.50033	0.55375	2.50017	0.9045
2.50867	3.41945	2.50833	2.25825	2.50867	0.55415	2.5085	0.9079
2.517	3.2162	2.51667	2.1385	2.517	0.554	2.51683	0.9103
2.52533	3.0419	2.525	2.0335	2.52533	0.5577	2.52517	0.9142
2.53367	2.88935	2.53333	1.94035	2.53367	0.56005	2.5335	0.91855
2.542	2.7563	2.54167	1.8598	2.542	0.56425	2.54183	0.92455
2.55033	2.63825	2.55	1.788	2.55033	0.569	2.55017	0.9314
2.55867	2.5343	2.55833	1.7237	2.55867	0.5744	2.5585	0.9369
2.567	2.44035	2.56667	1.66305	2.567	0.5783	2.56683	0.9427
2.57533	2.3514	2.575	1.60425	2.57533	0.5755	2.57517	0.94365
2.58367	2.26875	2.58333	1.5468	2.58367	0.57615	2.5835	0.9441
2.592	2.185	2.59167	1.4903	2.592	0.57205	2.59183	0.93845
2.60033	2.10375	2.6	1.43175	2.60033	0.5655	2.60017	0.92915
2.60867	2.0286	2.60833	1.3763	2.60867	0.55995	2.6085	0.92015
2.617	1.9531	2.61667	1.3218	2.617	0.55335	2.61683	0.907
2.62533	1.8801	2.625	1.26845	2.62533	0.5463	2.62517	0.89425
2.63367	1.8108	2.63333	1.2166	2.63367	0.5409	2.6335	0.88025
2.642	1.74245	2.64167	1.16845	2.642	0.5346	2.64183	0.86785
2.65033	1.6747	2.65	1.1223	2.65033	0.52795	2.65017	0.853
2.65867	1.61145	2.65833	1.07675	2.65867	0.5221	2.6585	0.83835
2.667	1.54985	2.66667	1.03455	2.667	0.5164	2.66683	0.82565
2.67533	1.48805	2.675	0.9912	2.67533	0.51155	2.67517	0.80735
2.68367	1.4298	2.68333	0.95135	2.68367	0.5168	2.6835	0.79215
2.692	1.3766	2.69167	0.9168	2.692	0.53005	2.69183	0.78225
2.70033	1.3312	2.7	0.8931	2.70033	0.55555	2.70017	0.7765
2.70867	1.2924	2.70833	0.87315	2.70867	0.59065	2.7085	0.7728
2.717	1.2615	2.71667	0.86255	2.717	0.6339	2.71683	0.77865
2.72533	1.2334	2.725	0.8518	2.72533	0.67335	2.72517	0.78345
2.73367	1.20895	2.73333	0.83975	2.73367	0.706	2.7335	0.7895
2.742	1.18435	2.74167	0.8231	2.742	0.73085	2.74183	0.79395
2.75033	1.1595	2.75	0.8028	2.75033	0.7429	2.75017	0.79165
2.75867	1.133	2.75833	0.77535	2.75867	0.74485	2.7585	0.79095
2.767	1.10785	2.76667	0.74455	2.767	0.7425	2.76683	0.78445
2.77533	1.08235	2.775	0.71315	2.77533	0.7358	2.77517	0.77885
2.78367	1.06115	2.78333	0.6837	2.78367	0.7191	2.7835	0.77105
2.792	1.0475	2.79167	0.65835	2.792	0.7047	2.79183	0.77115
2.80033	1.03245	2.8	0.6307	2.80033	0.6872	2.80017	0.76915
2.80867	1.0195	2.80833	0.6056	2.80867	0.6719	2.8085	0.7655
2.817	1.0079	2.81667	0.57825	2.817	0.6554	2.81683	0.756
2.82533	0.99785	2.825	0.55665	2.82533	0.6423	2.82517	0.74955
2.83367	0.98785	2.83333	0.5358	2.83367	0.62905	2.8335	0.7418
2.842	0.9749	2.84167	0.51465	2.842	0.61715	2.84183	0.73365
2.85033	0.96375	2.85	0.4924	2.85033	0.60525	2.85017	0.7236
2.85867	0.95075	2.85833	0.47345	2.85867	0.5926	2.8585	0.71515
2.867	0.938	2.86667	0.4554	2.867	0.58455	2.86683	0.7055
2.87533	0.92355	2.875	0.43455	2.87533	0.5739	2.87517	0.69585
2.88367	0.90985	2.88333	0.4177	2.88367	0.5663	2.8835	0.6855
2.892	0.8934	2.89167	0.39925	2.892	0.557	2.89183	0.67765
2.90033	0.8807	2.9	0.38255	2.90033	0.55525	2.90017	0.6715
2.90867	0.8724	2.90833	0.37355	2.90867	0.5555	2.9085	0.6676
2.917	0.8633	2.91667	0.36045	2.917	0.556	2.91683	0.6652
2.92533	0.86075	2.925	0.3558	2.92533	0.55965	2.92517	0.66665
2.93367	0.8659	2.93333	0.34845	2.93367	0.5639	2.9335	0.66435
2.942	0.88215	2.94167	0.3435	2.942	0.56835	2.94183	0.6678
2.95033	0.9124	2.95	0.33695	2.95033	0.5708	2.95017	0.6698
2.95867	0.9559	2.95833	0.3259	2.95867	0.5705	2.9585	0.66545
2.967	1.01315	2.96667	0.3131	2.967	0.5716	2.96683	0.65865
2.97533	1.0839	2.975	0.3015	2.97533	0.57435	2.97517	0.6523
2.98367	1.1547	2.98333	0.2873	2.98367	0.57485	2.9835	0.64245
2.992	1.2123	2.99167	0.26945	2.992	0.57225	2.99183	0.6272
3.00033	1.254	3	0.25245	3.00033	0.57125	3.00017	0.6101
3.00867	1.2756	3.00833	0.2315	3.00867	0.5695	3.0085	0.5937
3.017	1.2773	3.01667	0.2143	3.017	0.5699	3.01683	0.5788
3.02533	1.259	3.025	0.19615	3.02533	0.5675	3.02517	0.5587
3.03367	1.22995	3.03333	0.18115	3.03367	0.56925	3.0335	0.5452
3.042	1.1912	3.04167	0.16385	3.042	0.56595	3.04183	0.52735
3.05033	1.1455	3.05	0.14795	3.05033	0.56275	3.05017	0.5112
3.05867	1.09745	3.05833	0.1318	3.05867	0.5614	3.0585	0.49535
3.067	1.0484	3.06667	0.11765	3.067	0.5607	3.06683	0.4828
3.07533	1.00065	3.075	0.1025	3.07533	0.55845	3.07517	0.46875
3.08367	0.9549	3.08333	0.08975	3.08367	0.5583	3.0835	0.4559
3.092	0.91325	3.09167	0.0771	3.092	0.5633	3.09183	0.44355
3.10033	0.87705	3.1	0.0662	3.10033	0.56825	3.10017	0.43205
3.10867	0.84195	3.10833	0.0545	3.10867	0.57605	3.1085	0.423
3.117	0.81175	3.11667	0.046	3.117	0.58625	3.11683	0.4123
3.12533	0.78535	3.125	0.0351	3.12533	0.5932	3.12517	0.40055
3.13367	0.75975	3.13333	0.0261	3.13367	0.59755	3.1335	0.3932
3.142	0.73605	3.14167	0.01715	3.142	0.60105	3.14183	0.38525
3.15033	0.7126	3.15	0.0102	3.15033	0.6011	3.15017	0.37785
3.15867	0.6853	3.15833	-0.0017	3.15867	0.59845	3.1585	0.36755
3.167	0.66525	3.16667	-0.0049	3.167	0.59615	3.16683	0.3653
3.17533	0.6432	3.175	-0.0105	3.17533	0.59135	3.17517	0.35815
3.18367	0.6211	3.18333	-0.01855	3.18367	0.58575	3.1835	0.34905
3.192	0.60085	3.19167	-0.0274	3.192	0.5812	3.19183	0.3428
3.20033	0.5826	3.2	-0.0331	3.20033	0.5753	3.20017	0.33725
3.20867	0.5617	3.20833	-0.039	3.20867	0.571	3.2085	0.3315
3.217	0.54385	3.21667	-0.04615	3.217	0.56625	3.21683	0.32515
3.22533	0.52965	3.225	-0.04935	3.22533	0.5656	3.22517	0.3225
3.23367	0.5138	3.23333	-0.0548	3.23367	0.56165	3.2335	0.31625
3.242	0.5013	3.24167	-0.0567	3.242	0.56055	3.24183	0.31395
3.25033	0.4914	3.25	-0.05985	3.25033	0.5609	3.25017	0.31315
3.25867	0.4844	3.25833	-0.06075	3.25867	0.5623	3.2585	0.31395
3.267	0.47405	3.26667	-0.06265	3.267	0.56055	3.26683	0.3147
3.27533	0.47095	3.275	-0.0602	3.27533	0.5647	3.27517	0.31625
3.28367	0.4695	3.28333	-0.05645	3.28367	0.56815	3.2835	0.3177
3.292	0.4767	3.29167	-0.04555	3.292	0.57625	3.29183	0.3232
3.30033	0.4757	3.3	-0.0305	3.30033	0.5893	3.30017	0.32665
3.30867	0.51495	3.30833	-0.0031	3.30867	0.61385	3.3085	0.3348
3.317	0.55715	3.31667	0.0412	3.317	0.6496	3.31683	0.35095
3.32533	0.62125	3.325	0.103	3.32533	0.69965	3.32517	0.3743
3.33367	0.7116	3.33333	0.18845	3.33367	0.76925	3.3335	0.4097
3.342	0.82195	3.34167	0.2922	3.342	0.84965	3.34183	0.45045
3.35033	0.96135	3.35	0.4189	3.35033	0.9479	3.35017	0.50745
3.35867	1.1158	3.35833	0.5536	3.35867	1.0519	3.3585	0.56685
3.367	1.27585	3.36667	0.69325	3.367	1.1579	3.36683	0.63025
3.37533	1.45085	3.375	0.8416	3.37533	1.27465	3.37517	0.70895
3.38367	1.65925	3.38333	1.01805	3.38367	1.4279	3.3835	0.82685
3.392	1.7115	3.39167	1.04385	3.392	1.4322	3.39183	0.79795
3.40033	1.81335	3.4	1.11615	3.40033	1.48995	3.40017	0.8291
3.40867	1.94985	3.40833	1.227	3.40867	1.58855	3.4085	0.90365
3.417	2.03155	3.41667	1.2872	3.417	1.64145	3.41683	0.93485
3.42533	2.0932	3.425	1.33105	3.42533	1.6807	3.42517	0.9559
3.43367	2.14925	3.43333	1.37385	3.43367	1.71975	3.4335	0.98025
3.442	2.19195	3.44167	1.40355	3.442	1.74825	3.44183	0.99565
3.45033	2.2283	3.45	1.4316	3.45033	1.7717	3.45017	1.00905
3.45867	2.2582	3.45833	1.4546	3.45867	1.7939	3.4585	1.0213
3.467	2.2834	3.46667	1.4719	3.467	1.81075	3.46683	1.029
3.47533	2.3044	3.475	1.48775	3.47533	1.8258	3.47517	1.03245
3.48367	2.32225	3.48333	1.5019	3.48367	1.8386	3.4835	1.03865
3.492	2.33825	3.49167	1.51475	3.492	1.8506	3.49183	1.0435
3.50033	2.35095	3.5	1.5255	3.50033	1.861	3.50017	1.0441
3.50867	2.36215	3.50833	1.5362	3.50867	1.86875	3.5085	1.04585
3.517	2.3745	3.51667	1.5496	3.517	1.87925	3.51683	1.05235
3.52533	2.37955	3.525	1.5579	3.52533	1.8852	3.52517	1.0531
3.53367	2.3854	3.53333	1.56575	3.53367	1.8891	3.5335	1.05505
3.542	2.3978	3.54167	1.5751	3.542	1.89755	3.54183	1.0595
3.55033	2.40395	3.55	1.58485	3.55033	1.90545	3.55017	1.0618
3.55867	2.41885	3.55833	1.6014	3.55867	1.91925	3.5585	1.06985
3.567	2.43725	3.56667	1.61705	3.567	1.9347	3.56683	1.08145
3.57533	2.2868	3.575	1.46855	3.57533	1.78445	3.57517	0.9278
3.58367	2.4288	3.58333	1.612	3.58367	1.92765	3.5835	1.0664
3.592	2.44985	3.59167	1.6346	3.592	1.94845	3.59183	1.0856
3.60033	2.4472	3.6	1.63355	3.60033	1.9462	3.60017	1.0792
3.60867	2.44985	3.60833	1.6369	3.60867	1.9465	3.6085	1.07815
3.617	2.45355	3.61667	1.6405	3.617	1.94965	3.61683	1.07765
3.62533	2.4558	3.625	1.64405	3.62533	1.9529	3.62517	1.079
3.63367	2.459	3.63333	1.64765	3.63367	1.9543	3.6335	1.0794
3.642	2.464	3.64167	1.65265	3.642	1.95725	3.64183	1.08175
3.65033	2.46825	3.65	1.65845	3.65033	1.9619	3.65017	1.083
3.65867	2.4695	3.65833	1.6619	3.65867	1.96475	3.6585	1.0834
3.667	2.47095	3.66667	1.6634	3.667	1.9641	3.66683	1.0809
3.67533	2.4733	3.675	1.6687	3.67533	1.96495	3.67517	1.08265
3.68367	2.476	3.68333	1.6739	3.68367	1.97065	3.6835	1.0848
3.692	2.4787	3.69167	1.67565	3.692	1.97135	3.69183	1.08605
3.70033	2.48265	3.7	1.6818	3.70033	1.97395	3.70017	1.0886
3.70867	2.4844	3.70833	1.68435	3.70867	1.9753	3.7085	1.08925
3.717	2.4831	3.71667	1.6849	3.717	1.97525	3.71683	1.08755
3.72533	2.4861	3.725	1.6895	3.72533	1.9774	3.72517	1.0889
3.73367	2.49075	3.73333	1.69405	3.73367	1.9819	3.7335	1.09035
3.742	2.4907	3.74167	1.6956	3.742	1.9836	3.74183	1.0903
3.75033	2.49045	3.75	1.69715	3.75033	1.98225	3.75017	1.0892
3.75867	2.4906	3.75833	1.6981	3.75867	1.98315	3.7585	1.0887
3.767	2.49035	3.76667	1.6998	3.767	1.9844	3.76683	1.08745
3.77533	2.49065	3.775	1.7021	3.77533	1.9838	3.77517	1.0869
3.78367	2.48945	3.78333	1.7031	3.78367	1.98475	3.7835	1.08695
3.792	2.49005	3.79167	1.70515	3.792	1.9866	3.79183	1.0868
3.80033	2.4912	3.8	1.7087	3.80033	1.9888	3.80017	1.08765
3.80867	2.49	3.80833	1.7072	3.80867	1.98765	3.8085	1.08535
3.817	2.4886	3.81667	1.7066	3.817	1.9886	3.81683	1.0853
3.82533	2.48915	3.825	1.70735	3.82533	1.9871	3.82517	1.0847
3.83367	2.48705	3.83333	1.7064	3.83367	1.98545	3.8335	1.0837
3.842	2.487	3.84167	1.70705	3.842	1.98675	3.84183	1.08215
3.85033	2.48655	3.85	1.7084	3.85033	1.9861	3.85017	1.0829
3.85867	2.48425	3.85833	1.70875	3.85867	1.9867	3.8585	1.083
3.867	2.4831	3.86667	1.709	3.867	1.9848	3.86683	1.0794
3.87533	2.48315	3.875	1.707	3.87533	1.9849	3.87517	1.07895
3.88367	2.48365	3.88333	1.71085	3.88367	1.9844	3.8835	1.08045
3.892	2.481	3.89167	1.7086	3.892	1.98125	3.89183	1.07995
3.90033	2.4794	3.9	1.70995	3.90033	1.9811	3.90017	1.0801
3.90867	2.4787	3.90833	1.7099	3.90867	1.98105	3.9085	1.07855
3.917	2.48165	3.91667	1.71085	3.917	1.9816	3.91683	1.08035
3.92533	2.48195	3.925	1.7139	3.92533	1.9832	3.92517	1.08175
3.93367	2.47695	3.93333	1.71065	3.93367	1.98005	3.9335	1.07585
3.942	2.4763	3.94167	1.7103	3.942	1.97885	3.94183	1.07605
3.95033	2.47535	3.95	1.71065	3.95033	1.9787	3.95017	1.07695
3.95867	2.4728	3.95833	1.71115	3.95867	1.9808	3.9585	1.07515
3.967	2.4708	3.96667	1.7112	3.967	1.97835	3.96683	1.075
3.97533	2.46905	3.975	1.7109	3.97533	1.97745	3.97517	1.07425
3.98367	2.4668	3.98333	1.71085	3.98367	1.97695	3.9835	1.0733
3.992	2.46455	3.99167	1.7116	3.992	1.97775	3.99183	1.0739
4.00033	2.4639	4	1.7091	4.00033	1.9783	4.00017	1.0724
4.00867	2.462	4.00833	1.7071	4.00867	1.97405	4.0085	1.07065
4.017	2.45945	4.01667	1.70465	4.017	1.9729	4.01683	1.06855
4.02533	2.45875	4.025	1.70525	4.02533	1.9718	4.02517	1.07
4.03367	2.45655	4.03333	1.70405	4.03367	1.9704	4.0335	1.06875
4.042	2.4551	4.04167	1.70295	4.042	1.9705	4.04183	1.06855
4.05033	2.45365	4.05	1.7003	4.05033	1.96875	4.05017	1.06735
4.05867	2.4517	4.05833	1.70025	4.05867	1.9678	4.0585	1.06495
4.067	2.44705	4.06667	1.69895	4.067	1.9642	4.06683	1.06225
4.07533	2.44555	4.075	1.6974	4.07533	1.96135	4.07517	1.06235
4.08367	2.44225	4.08333	1.69475	4.08367	1.9601	4.0835	1.0615
4.092	2.4376	4.09167	1.6931	4.092	1.95685	4.09183	1.05895
4.10033	2.43555	4.1	1.6916	4.10033	1.95365	4.10017	1.05795
4.10867	2.43125	4.10833	1.68925	4.10867	1.9513	4.1085	1.05525
4.117	2.42845	4.11667	1.6884	4.117	1.9504	4.11683	1.05285
4.12533	2.4235	4.125	1.68615	4.12533	1.9474	4.12517	1.05005
4.13367	2.42265	4.13333	1.68565	4.13367	1.9479	4.1335	1.04885
4.142	2.4189	4.14167	1.6833	4.142	1.94415	4.14183	1.04825
4.15033	2.41435	4.15	1.68295	4.15033	1.94535	4.15017	1.0477
4.15867	2.4111	4.15833	1.681	4.15867	1.94325	4.1585	1.04715
4.167	2.40745	4.16667	1.67935	4.167	1.94255	4.16683	1.04705
4.17533	2.40565	4.175	1.6796	4.17533	1.94085	4.17517	1.04475
4.18367	2.40425	4.18333	1.6778	4.18367	1.93895	4.1835	1.0437
4.192	2.40175	4.19167	1.67565	4.192	1.93745	4.19183	1.04085
4.20033	2.40085	4.2	1.67405	4.20033	1.93605	4.20017	1.0402
4.20867	2.39965	4.20833	1.67215	4.20867	1.9338	4.2085	1.04055
4.217	2.3983	4.21667	1.6702	4.217	1.9331	4.21683	1.03935
4.22533	2.3993	4.225	1.66915	4.22533	1.93395	4.22517	1.03925
4.23367	2.39465	4.23333	1.66615	4.23367	1.9286	4.2335	1.03665
4.242	2.39485	4.24167	1.6672	4.242	1.93095	4.24183	1.036
4.25033	2.39575	4.25	1.66795	4.25033	1.93135	4.25017	1.0376
4.25867	2.3928	4.25833	1.6643	4.25867	1.9287	4.2585	1.03695
4.267	2.3942	4.26667	1.66675	4.267	1.92965	4.26683	1.03955
4.27533	2.39015	4.275	1.665	4.27533	1.92965	4.27517	1.0389
4.28367	2.39165	4.28333	1.66625	4.28367	1.92995	4.2835	1.043
4.292	2.3925	4.29167	1.66785	4.292	1.93395	4.29183	1.0478
4.30033	2.39385	4.3	1.6699	4.30033	1.93575	4.30017	1.0515
4.30867	2.39115	4.30833	1.66875	4.30867	1.9366	4.3085	1.05215
4.317	2.3882	4.31667	1.66675	4.317	1.9348	4.31683	1.05185
4.32533	2.3848	4.325	1.6644	4.32533	1.9354	4.32517	1.05435
4.33367	2.38275	4.33333	1.663	4.33367	1.9336	4.3335	1.05405
4.342	2.37555	4.34167	1.6574	4.342	1.92925	4.34183	1.04995
4.35033	2.37275	4.35	1.65585	4.35033	1.9277	4.35017	1.04925
4.35867	2.36465	4.35833	1.65165	4.35867	1.92215	4.3585	1.04555
4.367	2.35935	4.36667	1.64615	4.367	1.91925	4.36683	1.0407
4.37533	2.3519	4.375	1.641	4.37533	1.91585	4.37517	1.03865
4.38367	2.34755	4.38333	1.63775	4.38367	1.9123	4.3835	1.0345
4.392	2.34195	4.39167	1.63465	4.392	1.90785	4.39183	1.03095
4.40033	2.33655	4.4	1.63	4.40033	1.9029	4.40017	1.02555
4.40867	2.332	4.40833	1.62605	4.40867	1.9012	4.4085	1.02435
4.417	2.32625	4.41667	1.6207	4.417	1.89705	4.41683	1.021
4.42533	2.32065	4.425	1.61845	4.42533	1.8941	4.42517	1.0169
4.43367	2.31605	4.43333	1.6142	4.43367	1.89025	4.4335	1.0113
4.442	2.31375	4.44167	1.61235	4.442	1.88635	4.44183	1.01075
4.45033	2.30755	4.45	1.6069	4.45033	1.88015	4.45017	1.00705
4.45867	2.3032	4.45833	1.60535	4.45867	1.8769	4.4585	1.00355
4.467	2.299	4.46667	1.60095	4.467	1.87385	4.46683	1.00365
4.47533	2.2943	4.475	1.59875	4.47533	1.8685	4.47517	0.9975
4.48367	2.29345	4.48333	1.59985	4.48367	1.8697	4.4835	0.99815
4.492	2.2909	4.49167	1.5981	4.492	1.866	4.49183	0.99355
4.50033	2.2839	4.5	1.5932	4.50033	1.86155	4.50017	0.9896
4.50867	2.2832	4.50833	1.59075	4.50867	1.8592	4.5085	0.9867
4.517	2.2797	4.51667	1.58935	4.517	1.8582	4.51683	0.9851
4.52533	2.2747	4.525	1.58725	4.52533	1.854	4.52517	0.98085
4.53367	2.2706	4.53333	1.5837	4.53367	1.84995	4.5335	0.9796
4.542	2.2624	4.54167	1.5771	4.542	1.8437	4.54183	0.97235
4.55033	2.2641	4.55	1.57885	4.55033	1.84585	4.55017	0.97535
4.55867	2.26075	4.55833	1.5761	4.55867	1.844	4.5585	0.9755
4.567	2.2616	4.56667	1.5757	4.567	1.84575	4.56683	0.97725
4.57533	2.25975	4.575	1.57235	4.57533	1.84425	4.57517	0.97665
4.58367	2.2574	4.58333	1.57345	4.58367	1.84265	4.5835	0.9788
4.592	2.25355	4.59167	1.57165	4.592	1.8425	4.59183	0.98085
4.60033	2.25405	4.6	1.57345	4.60033	1.84425	4.60017	0.98905
4.60867	2.2571	4.60833	1.58015	4.60867	1.85315	4.6085	1.00325
4.617	2.266	4.61667	1.5947	4.617	1.86895	4.61683	1.0337
4.62533	2.28145	4.625	1.6174	4.62533	1.89405	4.62517	1.08275
4.63367	2.3086	4.63333	1.6514	4.63367	1.93565	4.6335	1.1698
4.642	2.3434	4.64167	1.69415	4.642	1.99305	4.64183	1.29245
4.65033	2.38435	4.65	1.74905	4.65033	2.0692	4.65017	1.4629
4.65867	2.4433	4.65833	1.81385	4.65867	2.1672	4.6585	1.6784
4.667	2.50065	4.66667	1.87505	4.667	2.2722	4.66683	1.9183
4.67533	2.55425	4.675	1.92935	4.67533	2.37495	4.67517	2.16205
4.68367	2.59165	4.68333	1.9646	4.68367	2.4546	4.6835	2.37115
4.692	2.61705	4.69167	1.98335	4.692	2.5152	4.69183	2.53725
4.70033	2.6251	4.7	1.98165	4.70033	2.5459	4.70017	2.6351
4.70867	2.6163	4.70833	1.96675	4.70867	2.549	4.7085	2.66465
4.717	2.59715	4.71667	1.93845	4.717	2.5273	4.71683	2.63275
4.72533	2.56795	4.725	1.90205	4.72533	2.48595	4.72517	2.5517
4.73367	2.53315	4.73333	1.8608	4.73367	2.43205	4.7335	2.434
4.742	2.49735	4.74167	1.8201	4.742	2.37395	4.74183	2.30025
4.75033	2.4608	4.75	1.77955	4.75033	2.31135	4.75017	2.1562
4.75867	2.42505	4.75833	1.7413	4.75867	2.24615	4.7585	2.0126
4.767	2.3909	4.76667	1.7068	4.767	2.1897	4.76683	1.8753
4.77533	2.36125	4.775	1.6751	4.77533	2.134	4.77517	1.7446
4.78367	2.3322	4.78333	1.64515	4.78367	2.08335	4.7835	1.62705
4.792	2.30805	4.79167	1.6223	4.792	2.03955	4.79183	1.5234
4.80033	2.2838	4.8	1.59895	4.80033	1.9979	4.80017	1.43045
4.80867	2.2646	4.80833	1.5816	4.80867	1.9639	4.8085	1.3486
4.817	2.2464	4.81667	1.5641	4.817	1.9314	4.81683	1.2788
4.82533	2.23345	4.825	1.55265	4.82533	1.90555	4.82517	1.22175
4.83367	2.21895	4.83333	1.54185	4.83367	1.88405	4.8335	1.1728
4.842	2.2045	4.84167	1.53005	4.842	1.8631	4.84183	1.13155
4.85033	2.1978	4.85	1.52285	4.85033	1.8508	4.85017	1.1024
4.85867	2.1899	4.85833	1.51505	4.85867	1.8355	4.8585	1.0744
4.867	2.18205	4.86667	1.5077	4.867	1.8238	4.86683	1.0511
4.87533	2.1737	4.875	1.49965	4.87533	1.8135	4.87517	1.02945
4.88367	2.1698	4.88333	1.49415	4.88367	1.80635	4.8835	1.0167
4.892	2.16125	4.89167	1.49005	4.892	1.7975	4.89183	1.00335
4.90033	2.15595	4.9	1.48605	4.90033	1.79185	4.90017	0.9917
4.90867	2.15135	4.90833	1.48085	4.90867	1.7858	4.9085	0.98245
4.917	2.149	4.91667	1.4808	4.917	1.78305	4.91683	0.9756
4.92533	2.1444	4.925	1.47485	4.92533	1.779	4.92517	0.96765
4.93367	2.1395	4.93333	1.46975	4.93367	1.7745	4.9335	0.95965
4.942	2.13505	4.94167	1.46295	4.942	1.7706	4.94183	0.95115
4.95033	2.13165	4.95	1.4598	4.95033	1.76625	4.95017	0.94735
4.95867	2.12995	4.95833	1.4569	4.95867	1.76295	4.9585	0.9425
4.967	2.1239	4.96667	1.45255	4.967	1.7577	4.96683	0.9374
4.97533	2.12255	4.975	1.44875	4.97533	1.7569	4.97517	0.9344
4.98367	2.1205	4.98333	1.44615	4.98367	1.7541	4.9835	0.9315
4.992	2.1168	4.99167	1.44215	4.992	1.75055	4.99183	0.92565
5.00033	2.1131	5	1.4383	5.00033	1.74735	5.00017	0.91805
5.00867	2.1124	5.00833	1.43755	5.00867	1.74555	5.0085	0.9178
5.017	2.1122	5.01667	1.4353	5.017	1.74225	5.01683	0.9143
5.02533	2.1057	5.025	1.4313	5.02533	1.7381	5.02517	0.9091
5.03367	2.10495	5.03333	1.42965	5.03367	1.7351	5.0335	0.90675
5.042	2.10255	5.04167	1.42665	5.042	1.7332	5.04183	0.9044
5.05033	2.0998	5.05	1.42445	5.05033	1.73075	5.05017	0.9002
5.05867	2.0942	5.05833	1.4212	5.05867	1.72715	5.0585	0.8965
5.067	2.0944	5.06667	1.41985	5.067	1.72615	5.06683	0.8934
5.07533	2.0892	5.075	1.41535	5.07533	1.722	5.07517	0.8887
5.08367	2.08665	5.08333	1.4134	5.08367	1.72025	5.0835	0.88665
5.092	2.083	5.09167	1.41025	5.092	1.71905	5.09183	0.8841
5.10033	2.08245	5.1	1.4097	5.10033	1.7187	5.10017	0.88515
5.10867	2.0806	5.10833	1.40995	5.10867	1.7186	5.1085	0.88425
5.117	2.07775	5.11667	1.40355	5.117	1.71535	5.11683	0.88075
5.12533	2.07425	5.125	1.4007	5.12533	1.71725	5.12517	0.8814
5.13367	2.0724	5.13333	1.3967	5.13367	1.714	5.1335	0.8798
5.142	2.06735	5.14167	1.3933	5.142	1.71165	5.14183	0.87645
5.15033	2.0656	5.15	1.38935	5.15033	1.70865	5.15017	0.87495
5.15867	2.06405	5.15833	1.3892	5.15867	1.70975	5.1585	0.8746
5.167	2.06115	5.16667	1.38325	5.167	1.7068	5.16683	0.8721
5.17533	2.05915	5.175	1.38135	5.17533	1.7053	5.17517	0.872
5.18367	2.0564	5.18333	1.3773	5.18367	1.70405	5.1835	0.86795
5.192	2.05685	5.19167	1.3758	5.192	1.7021	5.19183	0.8682
5.20033	2.0558	5.2	1.3724	5.20033	1.7015	5.20017	0.8678
5.20867	2.0517	5.20833	1.369	5.20867	1.69615	5.2085	0.8634
5.217	2.04985	5.21667	1.36655	5.217	1.69505	5.21683	0.8637
5.22533	2.0508	5.225	1.3647	5.22533	1.69425	5.22517	0.86105
5.23367	2.05145	5.23333	1.36455	5.23367	1.6947	5.2335	0.8612
5.242	2.0475	5.24167	1.3596	5.242	1.6903	5.24183	0.85795
5.25033	2.0445	5.25	1.3546	5.25033	1.68745	5.25017	0.8541
5.25867	2.04195	5.25833	1.35205	5.25867	1.68505	5.2585	0.8528
5.267	2.03945	5.26667	1.35065	5.267	1.6832	5.26683	0.8507
5.27533	2.0352	5.275	1.34615	5.27533	1.68085	5.27517	0.84805
5.28367	2.0326	5.28333	1.3451	5.28367	1.67955	5.2835	0.84805
5.292	2.0316	5.29167	1.3445	5.292	1.6769	5.29183	0.8455
5.30033	2.0292	5.3	1.3415	5.30033	1.67825	5.30017	0.8452
5.30867	2.0245	5.30833	1.33905	5.30867	1.6758	5.3085	0.843
5.317	2.0231	5.31667	1.33645	5.317	1.67575	5.31683	0.84375
5.32533	2.0187	5.325	1.33345	5.32533	1.67285	5.32517	0.84135
5.33367	2.0167	5.33333	1.3338	5.33367	1.6729	5.3335	0.8421
5.342	2.01615	5.34167	1.3295	5.342	1.6726	5.34183	0.8375
5.35033	2.01725	5.35	1.33025	5.35033	1.67195	5.35017	0.8384
5.35867	2.01805	5.35833	1.3288	5.35867	1.67105	5.3585	0.8384
5.367	2.0201	5.36667	1.329	5.367	1.67275	5.36683	0.83915
5.37533	2.02055	5.375	1.32585	5.37533	1.67215	5.37517	0.8373
5.38367	2.02115	5.38333	1.32515	5.38367	1.67	5.3835	0.8399
5.392	2.0237	5.39167	1.3245	5.392	1.67155	5.39183	0.8405
5.40033	2.02465	5.4	1.3243	5.40033	1.6703	5.40017	0.84035
5.40867	2.0245	5.40833	1.3216	5.40867	1.67125	5.4085	0.84265
5.417	2.02345	5.41667	1.319	5.417	1.67035	5.41683	0.84305
5.42533	2.02295	5.425	1.31895	5.42533	1.67155	5.42517	0.8436
5.43367	2.01695	5.43333	1.3144	5.43367	1.66795	5.4335	0.83835
5.442	2.01415	5.44167	1.31015	5.442	1.667	5.44183	0.8369
5.45033	2.00855	5.45	1.3078	5.45033	1.6658	5.45017	0.8362
5.45867	2.0049	5.45833	1.30925	5.45867	1.66505	5.4585	0.83375
5.467	2.0062	5.46667	1.3112	5.467	1.66455	5.46683	0.83435
5.47533	2.0126	5.475	1.3216	5.47533	1.66815	5.47517	0.83795
5.48367	2.0249	5.48333	1.3426	5.48367	1.67835	5.4835	0.84605
5.492	2.0481	5.49167	1.3755	5.492	1.69465	5.49183	0.86105
5.50033	2.0907	5.5	1.4302	5.50033	1.7205	5.50017	0.88845
5.50867	2.15535	5.50833	1.5113	5.50867	1.7595	5.5085	0.9337
5.517	2.24065	5.51667	1.61975	5.517	1.815	5.51683	0.9963
5.52533	2.35645	5.525	1.76135	5.52533	1.893	5.52517	1.08845
5.53367	2.49205	5.53333	1.9276	5.53367	1.9895	5.5335	1.20485
5.542	2.6441	5.54167	2.1071	5.542	2.102	5.54183	1.3474
5.55033	2.7991	5.55	2.288	5.55033	2.22145	5.55017	1.50445
5.55867	2.94415	5.55833	2.44655	5.55867	2.3428	5.5585	1.66445
5.567	3.0626	5.56667	2.5708	5.567	2.4503	5.56683	1.81445
5.57533	3.14535	5.575	2.64555	5.57533	2.53225	5.57517	1.9394
5.58367	3.1826	5.58333	2.6682	5.58367	2.58655	5.5835	2.02495
5.592	3.17765	5.59167	2.64	5.592	2.60335	5.59183	2.06765
5.60033	3.13545	5.6	2.57055	5.60033	2.59255	5.60017	2.06835
5.60867	3.06185	5.60833	2.4695	5.60867	2.5476	5.6085	2.0241
5.617	2.96415	5.61667	2.34735	5.617	2.48355	5.61683	1.9469
5.62533	2.85695	5.625	2.21725	5.62533	2.4034	5.62517	1.84775
5.63367	2.74605	5.63333	2.0868	5.63367	2.3176	5.6335	1.7383
5.642	2.63905	5.64167	1.9627	5.642	2.2318	5.64183	1.6242
5.65033	2.53625	5.65	1.8495	5.65033	2.14915	5.65017	1.51225
5.65867	2.4439	5.65833	1.7491	5.65867	2.07225	5.6585	1.4079
5.667	2.3611	5.66667	1.66215	5.667	2.00075	5.66683	1.312
5.67533	2.29145	5.675	1.586	5.67533	1.93965	5.67517	1.2263
5.68367	2.2353	5.68333	1.5249	5.68367	1.8898	5.6835	1.1538
5.692	2.19	5.69167	1.47235	5.692	1.844	5.69183	1.093
5.70033	2.1572	5.7	1.43225	5.70033	1.80505	5.70017	1.03895
5.70867	2.1367	5.70833	1.3994	5.70867	1.77325	5.7085	0.9949
5.717	2.12795	5.71667	1.3793	5.717	1.74925	5.71683	0.9596
5.72533	2.13525	5.725	1.3681	5.72533	1.7307	5.72517	0.93425
5.73367	2.15305	5.73333	1.36485	5.73367	1.7156	5.7335	0.91215
5.742	2.18815	5.74167	1.3708	5.742	1.7077	5.74183	0.89555
5.75033	2.2338	5.75	1.3833	5.75033	1.69965	5.75017	0.8853
5.75867	2.28255	5.75833	1.401	5.75867	1.6971	5.7585	0.8805
5.767	2.3363	5.76667	1.4182	5.767	1.6956	5.76683	0.8763
5.77533	2.38355	5.775	1.436	5.77533	1.69615	5.77517	0.8758
5.78367	2.42505	5.78333	1.4463	5.78367	1.69965	5.7835	0.8789
5.792	2.45815	5.79167	1.4586	5.792	1.7112	5.79183	0.8891
5.80033	2.4744	5.8	1.4574	5.80033	1.7198	5.80017	0.8993
5.80867	2.4728	5.80833	1.4508	5.80867	1.7355	5.8085	0.91575
5.817	2.45975	5.81667	1.435	5.817	1.75035	5.81683	0.93455
5.82533	2.43455	5.825	1.4158	5.82533	1.7673	5.82517	0.95735
5.83367	2.3972	5.83333	1.39295	5.83367	1.78315	5.8335	0.97985
5.842	2.35675	5.84167	1.37045	5.842	1.7961	5.84183	1.00305
5.85033	2.31445	5.85	1.34585	5.85033	1.8063	5.85017	1.0227
5.85867	2.2704	5.85833	1.3234	5.85867	1.8111	5.8585	1.03515
5.867	2.2292	5.86667	1.30135	5.867	1.81005	5.86683	1.04075
5.87533	2.19105	5.875	1.2811	5.87533	1.80445	5.87517	1.03825
5.88367	2.15695	5.88333	1.2628	5.88367	1.7936	5.8835	1.0306
5.892	2.12725	5.89167	1.2473	5.892	1.7808	5.89183	1.01575
5.90033	2.10225	5.9	1.23295	5.90033	1.7655	5.90017	0.99485
5.90867	2.08105	5.90833	1.2225	5.90867	1.7493	5.9085	0.9757
5.917	2.0656	5.91667	1.2113	5.917	1.7346	5.91683	0.9532
5.92533	2.0545	5.925	1.2042	5.92533	1.71835	5.92517	0.9328
5.93367	2.04475	5.93333	1.196	5.93367	1.7039	5.9335	0.90875
5.942	2.038	5.94167	1.18775	5.942	1.68835	5.94183	0.8884
5.95033	2.0346	5.95	1.1828	5.95033	1.67835	5.95017	0.8709
5.95867	2.0326	5.95833	1.1798	5.95867	1.66755	5.9585	0.85455
5.967	2.03135	5.96667	1.1738	5.967	1.658	5.96683	0.84135
5.97533	2.03285	5.975	1.17175	5.97533	1.65035	5.97517	0.82775
5.98367	2.03755	5.98333	1.17155	5.98367	1.6485	5.9835	0.81775
5.992	2.0403	5.99167	1.1717	5.992	1.6431	5.99183	0.8082
6.00033	2.04745	6	1.17335	6.00033	1.64105	6.00017	0.80285
6.00867	2.05435	6.00833	1.173	6.00867	1.63745	6.0085	0.79685
6.017	2.05975	6.01667	1.1767	6.017	1.6359	6.01683	0.7947
6.02533	2.06705	6.025	1.17985	6.02533	1.6334	6.02517	0.792
6.03367	2.07725	6.03333	1.1863	6.03367	1.63585	6.0335	0.79425
6.042	2.08625	6.04167	1.18945	6.042	1.63595	6.04183	0.79555
6.05033	2.0958	6.05	1.192	6.05033	1.6381	6.05017	0.79995
6.05867	2.10315	6.05833	1.1914	6.05867	1.6385	6.0585	0.80105
6.067	2.10905	6.06667	1.1903	6.067	1.6372	6.06683	0.801
6.07533	2.1155	6.075	1.1863	6.07533	1.63585	6.07517	0.80085
6.08367	2.11795	6.08333	1.18135	6.08367	1.6353	6.0835	0.79795
6.092	2.12205	6.09167	1.1751	6.092	1.6338	6.09183	0.795
6.10033	2.1235	6.1	1.1667	6.10033	1.63085	6.10017	0.79115
6.10867	2.127	6.10833	1.1599	6.10867	1.6291	6.1085	0.7876
6.117	2.12915	6.11667	1.15215	6.117	1.6265	6.11683	0.78085
6.12533	2.13365	6.125	1.14495	6.12533	1.6244	6.12517	0.77475
6.13367	2.13795	6.13333	1.1391	6.13367	1.6219	6.1335	0.77165
6.142	2.1408	6.14167	1.13305	6.142	1.6193	6.14183	0.76685
6.15033	2.14205	6.15	1.12895	6.15033	1.61725	6.15017	0.7637
6.15867	2.14305	6.15833	1.1223	6.15867	1.61605	6.1585	0.7584
6.167	2.14665	6.16667	1.11815	6.167	1.61725	6.16683	0.75585
6.17533	2.1484	6.175	1.11555	6.17533	1.6166	6.17517	0.75395
6.18367	2.147	6.18333	1.1106	6.18367	1.615	6.1835	0.75105
6.192	2.144	6.19167	1.1074	6.192	1.6145	6.19183	0.7486
6.20033	2.1396	6.2	1.103	6.20033	1.6124	6.20017	0.7455
6.20867	2.13325	6.20833	1.1006	6.20867	1.6123	6.2085	0.7417
6.217	2.12705	6.21667	1.09735	6.217	1.6133	6.21683	0.74025
6.22533	2.1203	6.225	1.09495	6.22533	1.61335	6.22517	0.73995
6.23367	2.11775	6.23333	1.09475	6.23367	1.61385	6.2335	0.73875
6.242	2.11105	6.24167	1.09145	6.242	1.6155	6.24183	0.73835
6.25033	2.10565	6.25	1.0874	6.25033	1.6152	6.25017	0.73555
6.25867	2.1013	6.25833	1.0836	6.25867	1.61585	6.2585	0.73455
6.267	2.10055	6.26667	1.08065	6.267	1.61545	6.26683	0.73345
6.27533	2.10185	6.275	1.0774	6.27533	1.6154	6.27517	0.733
6.28367	2.10665	6.28333	1.07865	6.28367	1.61765	6.2835	0.73215
6.292	2.11545	6.29167	1.075	6.292	1.61715	6.29183	0.7326
6.30033	2.12305	6.3	1.07375	6.30033	1.61725	6.30017	0.7268
6.30867	2.1373	6.30833	1.07385	6.30867	1.62195	6.3085	0.72835
6.317	2.15045	6.31667	1.0708	6.317	1.62105	6.31683	0.72705
6.32533	2.16845	6.325	1.07045	6.32533	1.6216	6.32517	0.72775
6.33367	2.18195	6.33333	1.06945	6.33367	1.6229	6.3335	0.72705
6.342	2.1978	6.34167	1.06965	6.342	1.62495	6.34183	0.72685
6.35033	2.2108	6.35	1.0671	6.35033	1.627	6.35017	0.7263
6.35867	2.22105	6.35833	1.0649	6.35867	1.62685	6.3585	0.72425
6.367	2.22635	6.36667	1.0631	6.367	1.62675	6.36683	0.7216
6.37533	2.2272	6.375	1.05625	6.37533	1.6262	6.37517	0.71815
6.38367	2.22525	6.38333	1.05215	6.38367	1.6258	6.3835	0.7147
6.392	2.21585	6.39167	1.0458	6.392	1.6255	6.39183	0.7102
6.40033	2.2034	6.4	1.0389	6.40033	1.6234	6.40017	0.7062
6.40867	2.19185	6.40833	1.03215	6.40867	1.62495	6.4085	0.701
6.417	2.17705	6.41667	1.02795	6.417	1.6242	6.41683	0.69875
6.42533	2.1605	6.425	1.02145	6.42533	1.6219	6.42517	0.69245
6.43367	2.1412	6.43333	1.0135	6.43367	1.619	6.4335	0.6868
6.442	2.1259	6.44167	1.00905	6.442	1.6198	6.44183	0.68205
6.45033	2.10995	6.45	1.0029	6.45033	1.6176	6.45017	0.67845
6.45867	2.09685	6.45833	0.9969	6.45867	1.61645	6.4585	0.67465
6.467	2.08215	6.46667	0.99145	6.467	1.6164	6.46683	0.67
6.47533	2.0724	6.475	0.9864	6.47533	1.61655	6.47517	0.6684
6.48367	2.06395	6.48333	0.98365	6.48367	1.6169	6.4835	0.666
6.492	2.0577	6.49167	0.97785	6.492	1.6171	6.49183	0.66055
6.50033	2.05285	6.5	0.97355	6.50033	1.6174	6.50017	0.6573
6.50867	2.05095	6.50833	0.9705	6.50867	1.6182	6.5085	0.6549
6.517	2.05365	6.51667	0.96995	6.517	1.62095	6.51683	0.65425
6.52533	2.0525	6.525	0.96685	6.52533	1.62235	6.52517	0.65155
6.53367	2.05685	6.53333	0.9635	6.53367	1.62525	6.5335	0.6501
6.542	2.06915	6.54167	0.96295	6.542	1.62935	6.54183	0.6521
6.55033	2.07825	6.55	0.9621	6.55033	1.63145	6.55017	0.64785
6.55867	2.09245	6.55833	0.96025	6.55867	1.63385	6.5585	0.6469
6.567	2.112	6.56667	0.9568	6.567	1.6378	6.56683	0.6462
6.57533	2.1379	6.575	0.9572	6.57533	1.6435	6.57517	0.6459
6.58367	2.1663	6.58333	0.95555	6.58367	1.64695	6.5835	0.6446
6.592	2.19935	6.59167	0.9579	6.592	1.6565	6.59183	0.64685
6.60033	2.24005	6.6	0.96135	6.60033	1.66315	6.60017	0.64965
6.60867	2.27935	6.60833	0.96275	6.60867	1.67205	6.6085	0.65335
6.617	2.32035	6.61667	0.96355	6.617	1.6782	6.61683	0.6558
6.62533	2.36055	6.625	0.96235	6.62533	1.6866	6.62517	0.65845
6.63367	2.39625	6.63333	0.95965	6.63367	1.69175	6.6335	0.65805
6.642	2.4296	6.64167	0.9614	6.642	1.70215	6.64183	0.66225
6.65033	2.456	6.65	0.9599	6.65033	1.70925	6.65017	0.66275
6.65867	2.477	6.65833	0.95955	6.65867	1.7175	6.6585	0.66505
6.667	2.48865	6.66667	0.9562	6.667	1.72355	6.66683	0.6642
6.67533	2.4936	6.675	0.9541	6.67533	1.73185	6.67517	0.66435
6.68367	2.4898	6.68333	0.94785	6.68367	1.7377	6.6835	0.6606
6.692	2.4791	6.69167	0.9453	6.692	1.74395	6.69183	0.6576
6.70033	2.4629	6.7	0.9405	6.70033	1.7487	6.70017	0.6548
6.70867	2.4446	6.70833	0.9368	6.70867	1.75565	6.7085	0.65075
6.717	2.42185	6.71667	0.93215	6.717	1.7615	6.71683	0.64685
6.72533	2.39985	6.725	0.92915	6.72533	1.76985	6.72517	0.64365
6.73367	2.38155	6.73333	0.93105	6.73367	1.78105	6.7335	0.6422
6.742	2.358	6.74167	0.92825	6.742	1.7891	6.74183	0.63645
6.75033	2.34105	6.75	0.9276	6.75033	1.8009	6.75017	0.6332
6.75867	2.3275	6.75833	0.9293	6.75867	1.81105	6.7585	0.62905
6.767	2.3205	6.76667	0.9351	6.767	1.82665	6.76683	0.63
6.77533	2.313	6.775	0.93755	6.77533	1.8403	6.77517	0.62695
6.78367	2.31605	6.78333	0.94365	6.78367	1.85995	6.7835	0.6304
6.792	2.3198	6.79167	0.94915	6.792	1.87865	6.79183	0.6341
6.80033	2.328	6.8	0.9539	6.80033	1.9013	6.80017	0.63995
6.80867	2.33735	6.80833	0.9549	6.80867	1.92325	6.8085	0.6453
6.817	2.3482	6.81667	0.95605	6.817	1.9479	6.81683	0.65355
6.82533	2.36175	6.825	0.95805	6.82533	1.9707	6.82517	0.6638
6.83367	2.37745	6.83333	0.96015	6.83367	1.9974	6.8335	0.6729
6.842	2.39355	6.84167	0.96445	6.842	2.0255	6.84183	0.6838
6.85033	2.41005	6.85	0.96985	6.85033	2.0498	6.85017	0.69055
6.85867	2.4304	6.85833	0.9854	6.85867	2.07575	6.8585	0.6938
6.867	2.45575	6.86667	1.0106	6.867	2.10465	6.86683	0.69895
6.87533	2.4824	6.875	1.0507	6.87533	2.13155	6.87517	0.7021
6.88367	2.514	6.88333	1.104	6.88367	2.1612	6.8835	0.7072
6.892	2.54985	6.89167	1.17925	6.892	2.19695	6.89183	0.71115
6.90033	2.59225	6.9	1.27545	6.90033	2.24595	6.90017	0.71735
6.90867	2.6468	6.90833	1.40045	6.90867	2.3233	6.9085	0.72895
6.917	2.72825	6.91667	1.54095	6.917	2.4561	6.91683	0.7443
6.92533	2.85155	6.925	1.69675	6.92533	2.7092	6.92517	0.7652
6.93367	3.04375	6.93333	1.85665	6.93367	3.1785	6.9335	0.7874
6.942	3.34385	6.94167	2.01615	6.942	4.0117	6.94183	0.8132
6.95033	3.7942	6.95	2.16955	6.95033	5.37765	6.95017	0.84085
6.95867	4.42115	6.95833	2.302	6.95867	7.4231	6.9585	0.86805
6.967	5.24305	6.96667	2.4035	6.967	10.2382	6.96683	0.8921
6.97533	6.244	6.975	2.4759	6.97533	13.8125	6.97517	0.91895
6.98367	7.37405	6.98333	2.50805	6.98367	17.9958	6.9835	0.9415
6.992	8.56715	6.99167	2.50435	6.992	22.5394	6.99183	0.96235
7.00033	9.7443	7	2.46485	7.00033	27.1269	7.00017	0.9859
7.00867	10.8321	7.00833	2.39825	7.00867	31.4677	7.0085	1.0114
7.017	11.7774	7.01667	2.3067	7.017	35.2704	7.01683	1.0443
7.02533	12.545	7.025	2.20165	7.02533	38.3801	7.02517	1.08345
7.03367	13.126	7.03333	2.08795	7.03367	40.769	7.0335	1.12425
7.042	13.5264	7.04167	1.9703	7.042	42.4709	7.04183	1.16435
7.05033	13.7655	7.05	1.85665	7.05033	43.568	7.05017	1.19855
7.05867	13.8659	7.05833	1.7463	7.05867	44.1846	7.0585	1.21945
7.067	13.8519	7.06667	1.6453	7.067	44.4308	7.06683	1.23135
7.07533	13.7448	7.075	1.5512	7.07533	44.3862	7.07517	1.2313
7.08367	13.5727	7.08333	1.4653	7.08367	44.1315	7.0835	1.2192
7.092	13.3346	7.09167	1.391	7.092	43.7375	7.09183	1.20035
7.10033	13.0577	7.1	1.32425	7.10033	43.2478	7.10017	1.17455
7.10867	12.75	7.10833	1.2654	7.10867	42.6992	7.1085	1.144
7.117	12.426	7.11667	1.2155	7.117	42.1067	7.11683	1.1102
7.12533	12.0875	7.125	1.1687	7.12533	41.4958	7.12517	1.07565
7.13367	11.7462	7.13333	1.1286	7.13367	40.8635	7.1335	1.03925
7.142	11.4035	7.14167	1.0946	7.142	40.224	7.14183	1.007
7.15033	11.0602	7.15	1.06405	7.15033	39.5737	7.15017	0.97325
7.15867	10.7208	7.15833	1.03745	7.15867	38.9188	7.1585	0.942
7.167	10.3872	7.16667	1.01455	7.167	38.2567	7.16683	0.91245
7.17533	10.06	7.175	0.993	7.17533	37.5896	7.17517	0.8848
7.18367	9.74285	7.18333	0.97175	7.18367	36.9236	7.1835	0.86035
7.192	9.4374	7.19167	0.9537	7.192	36.2777	7.19183	0.8359
7.20033	9.14175	7.2	0.93855	7.20033	35.6317	7.20017	0.8146
7.20867	8.85515	7.20833	0.92275	7.20867	34.9769	7.2085	0.7922
7.217	8.58345	7.21667	0.9122	7.217	34.3373	7.21683	0.7749
7.22533	8.3222	7.225	0.90225	7.22533	33.7248	7.22517	0.7578
7.23367	8.0754	7.23333	0.8958	7.23367	33.1249	7.2335	0.74205
7.242	7.84205	7.24167	0.8951	7.242	32.5439	7.24183	0.72805
7.25033	7.6301	7.25	0.9024	7.25033	32.0031	7.25017	0.7194
7.25867	7.43845	7.25833	0.91795	7.25867	31.4811	7.2585	0.71485
7.267	7.272	7.26667	0.9451	7.267	30.9776	7.26683	0.7151
7.27533	7.13245	7.275	0.98635	7.27533	30.5083	7.27517	0.72245
7.28367	7.01475	7.28333	1.04035	7.28367	30.0699	7.2835	0.7411
7.292	6.92505	7.29167	1.10575	7.292	29.6626	7.29183	0.7684
7.30033	6.8525	7.3	1.174	7.30033	29.2881	7.30017	0.8003
7.30867	6.78675	7.30833	1.2395	7.30867	28.9326	7.3085	0.83865
7.317	6.72235	7.31667	1.2947	7.317	28.598	7.31683	0.87975
7.32533	6.6509	7.325	1.3315	7.32533	28.2651	7.32517	0.9151
7.33367	6.56495	7.33333	1.34785	7.33367	27.9389	7.3335	0.943
7.342	6.46495	7.34167	1.34105	7.342	27.6081	7.34183	0.9605
7.35033	6.3512	7.35	1.31635	7.35033	27.271	7.35017	0.96115
7.35867	6.2275	7.35833	1.2764	7.35867	26.9306	7.3585	0.95165
7.367	6.0931	7.36667	1.2228	7.367	26.584	7.36683	0.9252
7.37533	5.9602	7.375	1.1692	7.37533	26.2386	7.37517	0.8977
7.38367	5.8255	7.38333	1.11375	7.38367	25.9094	7.3835	0.8645
7.392	5.69345	7.39167	1.06325	7.392	25.5755	7.39183	0.828
7.40033	5.56155	7.4	1.01365	7.40033	25.246	7.40017	0.79525
7.40867	5.43095	7.40833	0.97355	7.40867	24.9354	7.4085	0.76255
7.417	5.2997	7.41667	0.93525	7.417	24.6403	7.41683	0.7338
7.42533	5.1688	7.425	0.90625	7.42533	24.3559	7.42517	0.7103
7.43367	5.03555	7.43333	0.8777	7.43367	24.0901	7.4335	0.68355
7.442	4.9036	7.44167	0.8567	7.442	23.8369	7.44183	0.6647
7.45033	4.77195	7.45	0.8385	7.45033	23.5908	7.45017	0.6492
7.45867	4.63715	7.45833	0.8216	7.45867	23.3464	7.4585	0.63515
7.467	4.5058	7.46667	0.8074	7.467	23.1099	7.46683	0.6232
7.47533	4.3743	7.475	0.79565	7.47533	22.8734	7.47517	0.61075
7.48367	4.2485	7.48333	0.7863	7.48367	22.6434	7.4835	0.6015
7.492	4.1244	7.49167	0.77475	7.492	22.4142	7.49183	0.58985
7.50033	4.00625	7.5	0.76545	7.50033	22.1873	7.50017	0.58175
7.50867	3.89215	7.50833	0.7567	7.50867	21.965	7.5085	0.5744
7.517	3.78385	7.51667	0.7518	7.517	21.7424	7.51683	0.567
7.52533	3.68065	7.525	0.74345	7.52533	21.5241	7.52517	0.561
7.53367	3.58455	7.53333	0.7391	7.53367	21.3103	7.5335	0.55635
7.542	3.49515	7.54167	0.73665	7.542	21.1063	7.54183	0.55355
7.55033	3.40935	7.55	0.732	7.55033	20.8964	7.55017	0.5492
7.55867	3.33085	7.55833	0.7267	7.55867	20.6929	7.5585	0.54495
7.567	3.25745	7.56667	0.72345	7.567	20.4999	7.56683	0.54205
7.57533	3.1868	7.575	0.71865	7.57533	20.3028	7.57517	0.5389
7.58367	3.12275	7.58333	0.71515	7.58367	20.1018	7.5835	0.5366
7.592	3.06175	7.59167	0.71005	7.592	19.9018	7.59183	0.5311
7.60033	3.005	7.6	0.70595	7.60033	19.7096	7.60017	0.52865
7.60867	2.95455	7.60833	0.7041	7.60867	19.5181	7.6085	0.5275
7.617	2.904	7.61667	0.6996	7.617	19.3268	7.61683	0.52185
7.62533	2.85785	7.625	0.69775	7.62533	19.1415	7.62517	0.51875
7.63367	2.813	7.63333	0.6929	7.63367	18.9519	7.6335	0.5163
7.642	2.7728	7.64167	0.68995	7.642	18.7615	7.64183	0.51485
7.65033	2.73405	7.65	0.68865	7.65033	18.5703	7.65017	0.5153
7.65867	2.6957	7.65833	0.6845	7.65867	18.3768	7.6585	0.511
7.667	2.6613	7.66667	0.6841	7.667	18.1902	7.66683	0.51145
7.67533	2.62515	7.675	0.68115	7.67533	18.0003	7.67517	0.50905
7.68367	2.5912	7.68333	0.67815	7.68367	17.8138	7.6835	0.5073
7.692	2.56025	7.69167	0.6735	7.692	17.6267	7.69183	0.5051
7.70033	2.52755	7.7	0.6727	7.70033	17.4419	7.70017	0.50535
7.70867	2.4956	7.70833	0.6705	7.70867	17.2578	7.7085	0.5028
7.717	2.4647	7.71667	0.6666	7.717	17.0716	7.71683	0.5016
7.72533	2.4349	7.725	0.66525	7.72533	16.89	7.72517	0.50035
7.73367	2.4052	7.73333	0.66245	7.73367	16.7066	7.7335	0.4991
7.742	2.3772	7.74167	0.6616	7.742	16.5253	7.74183	0.4992
7.75033	2.3481	7.75	0.6582	7.75033	16.3413	7.75017	0.4954
7.75867	2.3212	7.75833	0.65555	7.75867	16.1647	7.7585	0.4939
7.767	2.29435	7.76667	0.6528	7.767	15.9784	7.76683	0.49245
7.77533	2.268	7.775	0.64925	7.77533	15.788	7.77517	0.4887
7.78367	2.2426	7.78333	0.64725	7.78367	15.6011	7.7835	0.4863
7.792	2.21675	7.79167	0.644	7.792	15.4169	7.79183	0.48385
7.80033	2.1932	7.8	0.64125	7.80033	15.2325	7.80017	0.4813
7.80867	2.17105	7.80833	0.6397	7.80867	15.0534	7.8085	0.47695
7.817	2.1502	7.81667	0.63785	7.817	14.8772	7.81683	0.4749
7.82533	2.1261	7.825	0.6349	7.82533	14.6973	7.82517	0.47245
7.83367	2.1038	7.83333	0.63195	7.83367	14.5169	7.8335	0.46905
7.842	2.0802	7.84167	0.62885	7.842	14.3359	7.84183	0.4649
7.85033	2.06305	7.85	0.62695	7.85033	14.1609	7.85017	0.4659
7.85867	2.04435	7.85833	0.62565	7.85867	13.9816	7.8585	0.4647
7.867	2.0216	7.86667	0.62195	7.867	13.8011	7.86683	0.4596
7.87533	2.0037	7.875	0.61575	7.87533	13.6223	7.87517	0.4583
7.88367	1.98615	7.88333	0.6135	7.88367	13.4418	7.8835	0.45655
7.892	1.9676	7.89167	0.61025	7.892	13.2599	7.89183	0.45335
7.90033	1.9486	7.9	0.60495	7.90033	13.079	7.90017	0.45075
7.90867	1.9317	7.90833	0.6011	7.90867	12.8996	7.9085	0.44695
7.917	1.9155	7.91667	0.5975	7.917	12.7209	7.91683	0.44525
7.92533	1.89935	7.925	0.59155	7.92533	12.5389	7.92517	0.4403
7.93367	1.8825	7.93333	0.58755	7.93367	12.357	7.9335	0.4348
7.942	1.8677	7.94167	0.58505	7.942	12.1854	7.94183	0.4326
7.95033	1.8524	7.95	0.58435	7.95033	12.0134	7.95017	0.4294
7.95867	1.83935	7.95833	0.5811	7.95867	11.8357	7.9585	0.4239
7.967	1.8268	7.96667	0.58295	7.967	11.6612	7.96683	0.4241
7.97533	1.81555	7.975	0.584	7.97533	11.4927	7.97517	0.42555
7.98367	1.80595	7.98333	0.58755	7.98367	11.3252	7.9835	0.4303
7.992	1.7944	7.99167	0.5884	7.992	11.1602	7.99183	0.43025
8.00033	1.78455	8	0.5935	8.00033	11.0007	8.00017	0.4366
8.00867	1.77255	8.00833	0.5922	8.00867	10.8376	8.0085	0.43845
8.017	1.76095	8.01667	0.59365	8.017	10.6729	8.01683	0.44265
8.02533	1.7503	8.025	0.5929	8.02533	10.5084	8.02517	0.4436
8.03367	1.7389	8.03333	0.59365	8.03367	10.3421	8.0335	0.4451
8.042	1.72985	8.04167	0.59345	8.042	10.1788	8.04183	0.44695
8.05033	1.7203	8.05	0.5927	8.05033	10.0145	8.05017	0.44285
8.05867	1.7066	8.05833	0.5883	8.05867	9.8469	8.0585	0.4383
8.067	1.69775	8.06667	0.5851	8.067	9.6854	8.06683	0.4392
8.07533	1.68895	8.075	0.5846	8.07533	9.52425	8.07517	0.438
8.08367	1.6789	8.08333	0.57975	8.08367	9.36195	8.0835	0.43315
8.092	1.6691	8.09167	0.578	8.092	9.20405	8.09183	0.43075
8.10033	1.66055	8.1	0.5765	8.10033	9.0479	8.10017	0.43005
8.10867	1.65145	8.10833	0.57535	8.10867	8.89385	8.1085	0.4294
8.117	1.64315	8.11667	0.5715	8.117	8.74025	8.11683	0.4288
8.12533	1.6329	8.125	0.56945	8.12533	8.5916	8.12517	0.4275
8.13367	1.62315	8.13333	0.5659	8.13367	8.44335	8.1335	0.42555
8.142	1.61155	8.14167	0.56195	8.142	8.2907	8.14183	0.42355
8.15033	1.6008	8.15	0.55805	8.15033	8.1403	8.15017	0.42235
8.15867	1.5926	8.15833	0.557	8.15867	7.9952	8.1585	0.42195
8.167	1.58155	8.16667	0.5549	8.167	7.85005	8.16683	0.4221
8.17533	1.5719	8.175	0.5509	8.17533	7.7048	8.17517	0.419
8.18367	1.5606	8.18333	0.54755	8.18367	7.56335	8.1835	0.4159
8.192	1.55	8.19167	0.5467	8.192	7.4235	8.19183	0.41355
8.20033	1.54115	8.2	0.54475	8.20033	7.2841	8.20017	0.4122
8.20867	1.53175	8.20833	0.5427	8.20867	7.1443	8.2085	0.41055
8.217	1.52285	8.21667	0.54195	8.217	7.0081	8.21683	0.40765
8.22533	1.5191	8.225	0.54425	8.22533	6.875	8.22517	0.4087
8.23367	1.51595	8.23333	0.54835	8.23367	6.74675	8.2335	0.41115
8.242	1.5147	8.24167	0.55195	8.242	6.62025	8.24183	0.4115
8.25033	1.51265	8.25	0.55425	8.25033	6.49495	8.25017	0.4131
8.25867	1.5153	8.25833	0.5632	8.25867	6.3751	8.2585	0.4171
8.267	1.51795	8.26667	0.57265	8.267	6.2604	8.26683	0.42105
8.27533	1.5206	8.275	0.57955	8.27533	6.14555	8.27517	0.42475
8.28367	1.52395	8.28333	0.5899	8.28367	6.0373	8.2835	0.43195
8.292	1.52335	8.29167	0.59575	8.292	5.92675	8.29183	0.4359
8.30033	1.5238	8.3	0.60205	8.30033	5.81905	8.30017	0.44305
8.30867	1.5172	8.30833	0.60275	8.30867	5.71045	8.3085	0.44775
8.317	1.5115	8.31667	0.603	8.317	5.6002	8.31683	0.44955
8.32533	1.5022	8.325	0.5999	8.32533	5.49015	8.32517	0.4508
8.33367	1.48935	8.33333	0.59255	8.33367	5.3743	8.3335	0.4499
8.342	1.477	8.34167	0.5853	8.342	5.25795	8.34183	0.44635
8.35033	1.46155	8.35	0.576	8.35033	5.14205	8.35017	0.4397
8.35867	1.4465	8.35833	0.56425	8.35867	5.02595	8.3585	0.43365
8.367	1.4325	8.36667	0.5563	8.367	4.9149	8.36683	0.426
8.37533	1.41695	8.375	0.54615	8.37533	4.80315	8.37517	0.417
8.38367	1.4052	8.38333	0.53905	8.38367	4.69315	8.3835	0.4116
8.392	1.39315	8.39167	0.5318	8.392	4.5874	8.39183	0.4063
8.40033	1.3804	8.4	0.5255	8.40033	4.48165	8.40017	0.40165
8.40867	1.36845	8.40833	0.5187	8.40867	4.3769	8.4085	0.39545
8.417	1.36235	8.41667	0.5171	8.417	4.2807	8.41683	0.39495
8.42533	1.35125	8.425	0.51215	8.42533	4.1815	8.42517	0.3915
8.43367	1.3438	8.43333	0.50675	8.43367	4.08635	8.4335	0.38625
8.442	1.33645	8.44167	0.5019	8.442	3.99415	8.44183	0.38505
8.45033	1.32695	8.45	0.49945	8.45033	3.90255	8.45017	0.38135
8.45867	1.32095	8.45833	0.4976	8.45867	3.8122	8.4585	0.38025
8.467	1.3132	8.46667	0.4969	8.467	3.72715	8.46683	0.3811
8.47533	1.306	8.475	0.49625	8.47533	3.642	8.47517	0.38255
8.48367	1.29985	8.48333	0.49305	8.48367	3.5578	8.4835	0.3813
8.492	1.2922	8.49167	0.4906	8.492	3.47735	8.49183	0.38135
8.50033	1.28545	8.5	0.48935	8.50033	3.3984	8.50017	0.38165
8.50867	1.27785	8.50833	0.486	8.50867	3.3182	8.5085	0.38095
8.517	1.2722	8.51667	0.4818	8.517	3.24035	8.51683	0.38
8.52533	1.26465	8.525	0.48105	8.52533	3.1649	8.52517	0.3791
8.53367	1.2575	8.53333	0.478	8.53367	3.0916	8.5335	0.37815
8.542	1.2477	8.54167	0.4734	8.542	3.0178	8.54183	0.376
8.55033	1.2404	8.55	0.4718	8.55033	2.94755	8.55017	0.37185
8.55867	1.231	8.55833	0.4675	8.55867	2.8763	8.5585	0.36745
8.567	1.22555	8.56667	0.4624	8.567	2.8077	8.56683	0.3661
8.57533	1.2197	8.575	0.46335	8.57533	2.7419	8.57517	0.36625
8.58367	1.2109	8.58333	0.45875	8.58367	2.67375	8.5835	0.3623
8.592	1.2037	8.59167	0.45625	8.592	2.60605	8.59183	0.3578
8.60033	1.2003	8.6	0.4543	8.60033	2.54485	8.60017	0.3579
8.60867	1.19575	8.60833	0.4525	8.60867	2.4831	8.6085	0.35565
8.617	1.19165	8.61667	0.45195	8.617	2.42225	8.61683	0.3545
8.62533	1.18855	8.625	0.44725	8.62533	2.36135	8.62517	0.35025
8.63367	1.1847	8.63333	0.4458	8.63367	2.30385	8.6335	0.3488
8.642	1.1805	8.64167	0.4437	8.642	2.24595	8.64183	0.3466
8.65033	1.17675	8.65	0.4401	8.65033	2.1897	8.65017	0.34525
8.65867	1.1757	8.65833	0.4401	8.65867	2.1376	8.6585	0.34665
8.667	1.17315	8.66667	0.43985	8.667	2.0859	8.66683	0.346
8.67533	1.1712	8.675	0.43785	8.67533	2.03315	8.67517	0.3436
8.68367	1.1671	8.68333	0.43545	8.68367	1.98325	8.6835	0.3427
8.692	1.16545	8.69167	0.43475	8.692	1.93575	8.69183	0.34375
8.70033	1.16255	8.7	0.43405	8.70033	1.8875	8.70017	0.34255
8.70867	1.1582	8.70833	0.4298	8.70867	1.83975	8.7085	0.341
8.717	1.15525	8.71667	0.42875	8.717	1.79435	8.71683	0.3405
8.72533	1.1497	8.725	0.42535	8.72533	1.7483	8.72517	0.3397
8.73367	1.14505	8.73333	0.42765	8.73367	1.7083	8.7335	0.3436
8.742	1.1376	8.74167	0.42165	8.742	1.66225	8.74183	0.3378
8.75033	1.13205	8.75	0.42225	8.75033	1.621	8.75017	0.33905
8.75867	1.1245	8.75833	0.4189	8.75867	1.57735	8.7585	0.3375
8.767	1.1176	8.76667	0.4173	8.767	1.5384	8.76683	0.3363
8.77533	1.1089	8.775	0.41455	8.77533	1.49675	8.77517	0.33345
8.78367	1.0999	8.78333	0.4128	8.78367	1.45755	8.7835	0.3312
8.792	1.0946	8.79167	0.41145	8.792	1.42075	8.79183	0.3318
8.80033	1.0865	8.8	0.41015	8.80033	1.38285	8.80017	0.32925
8.80867	1.0792	8.80833	0.40625	8.80867	1.3469	8.8085	0.32655
8.817	1.07145	8.81667	0.40395	8.817	1.3107	8.81683	0.3241
8.82533	1.0639	8.825	0.40295	8.82533	1.27465	8.82517	0.32215
8.83367	1.05715	8.83333	0.39965	8.83367	1.2397	8.8335	0.3202
8.842	1.0521	8.84167	0.39995	8.842	1.20875	8.84183	0.3209
8.85033	1.0474	8.85	0.4001	8.85033	1.17825	8.85017	0.32115
8.85867	1.04095	8.85833	0.4	8.85867	1.14855	8.8585	0.3209
8.867	1.0386	8.86667	0.3974	8.867	1.1195	8.86683	0.3217
8.87533	1.03245	8.875	0.3935	8.87533	1.0886	8.87517	0.32045
8.88367	1.0288	8.88333	0.3923	8.88367	1.05985	8.8835	0.32
8.892	1.02595	8.89167	0.39175	8.892	1.0321	8.89183	0.3182
8.90033	1.0216	8.9	0.3885	8.90033	1.0039	8.90017	0.31615
8.90867	1.02095	8.90833	0.3874	8.90867	0.97855	8.9085	0.3181
8.917	1.02305	8.91667	0.3876	8.917	0.95345	8.91683	0.3192
8.92533	1.0263	8.925	0.38845	8.92533	0.93065	8.92517	0.3188
8.93367	1.02615	8.93333	0.38495	8.93367	0.90405	8.9335	0.3147
8.942	1.03015	8.94167	0.3866	8.942	0.87995	8.94183	0.31635
8.95033	1.03855	8.95	0.38705	8.95033	0.85945	8.95017	0.3184
8.95867	1.04695	8.95833	0.3887	8.95867	0.8376	8.9585	0.3201
8.967	1.05465	8.96667	0.3868	8.967	0.81625	8.96683	0.3203
8.97533	1.06605	8.975	0.38815	8.97533	0.79525	8.97517	0.3218
8.98367	1.0769	8.98333	0.38835	8.98367	0.77585	8.9835	0.32395
8.992	1.08585	8.99167	0.3894	8.992	0.7555	8.99183	0.3221
9.00033	1.09515	9	0.38675	9.00033	0.73445	9.00017	0.3219
9.00867	1.1037	9.00833	0.3875	9.00867	0.71665	9.0085	0.323
9.017	1.1078	9.01667	0.38655	9.017	0.69645	9.01683	0.3209
9.02533	1.1113	9.025	0.38505	9.02533	0.6781	9.02517	0.3213
9.03367	1.11115	9.03333	0.3831	9.03367	0.65795	9.0335	0.31935
9.042	1.11105	9.04167	0.38095	9.042	0.63895	9.04183	0.3202
9.05033	1.1073	9.05	0.38075	9.05033	0.62105	9.05017	0.31835
9.05867	1.09875	9.05833	0.37605	9.05867	0.60295	9.0585	0.3151
9.067	1.09295	9.06667	0.3725	9.067	0.5849	9.06683	0.31395
9.07533	1.08295	9.075	0.36985	9.07533	0.564	9.07517	0.31245
9.08367	1.07455	9.08333	0.3678	9.08367	0.5485	9.0835	0.30985
9.092	1.06575	9.09167	0.3654	9.092	0.5296	9.09183	0.3081
9.10033	1.0598	9.1	0.365	9.10033	0.51555	9.10017	0.30915
9.10867	1.05485	9.10833	0.3614	9.10867	0.49845	9.1085	0.3059
9.117	1.0541	9.11667	0.36245	9.117	0.4833	9.11683	0.3053
9.12533	1.0587	9.125	0.3602	9.12533	0.4694	9.12517	0.30205
9.13367	1.0717	9.13333	0.358	9.13367	0.45295	9.1335	0.2995
9.142	1.09305	9.14167	0.35675	9.142	0.4358	9.14183	0.29785
9.15033	1.127	9.15	0.3564	9.15033	0.42195	9.15017	0.29555
9.15867	1.1774	9.15833	0.3593	9.15867	0.40955	9.1585	0.29535
9.167	1.24965	9.16667	0.36405	9.167	0.3982	9.16683	0.29635
9.17533	1.33955	9.175	0.3685	9.17533	0.3872	9.17517	0.29535
9.18367	1.4526	9.18333	0.374	9.18367	0.3754	9.1835	0.2952
9.192	1.59095	9.19167	0.38195	9.192	0.3649	9.19183	0.2948
9.20033	1.75535	9.2	0.39875	9.20033	0.3576	9.20017	0.29815
9.20867	1.9405	9.20833	0.4198	9.20867	0.35325	9.2085	0.30175
9.217	2.14725	9.21667	0.44975	9.217	0.352	9.21683	0.31055
9.22533	2.3674	9.225	0.49405	9.22533	0.35705	9.22517	0.32455
9.23367	2.59535	9.23333	0.55175	9.23367	0.36895	9.2335	0.34445
9.242	2.82015	9.24167	0.62605	9.242	0.3914	9.24183	0.3728
9.25033	3.0332	9.25	0.72055	9.25033	0.4218	9.25017	0.4097
9.25867	3.2207	9.25833	0.83135	9.25867	0.46295	9.2585	0.458
9.267	3.37545	9.26667	0.9526	9.267	0.51305	9.26683	0.51515
9.27533	3.48575	9.275	1.08365	9.27533	0.5757	9.27517	0.5823
9.28367	3.54605	9.28333	1.2117	9.28367	0.63915	9.2835	0.6543
9.292	3.54655	9.29167	1.32585	9.292	0.7008	9.29183	0.7241
9.30033	3.4943	9.3	1.4153	9.30033	0.7579	9.30017	0.7882
9.30867	3.3883	9.30833	1.47445	9.30867	0.80225	9.3085	0.8388
9.317	3.23605	9.31667	1.49425	9.317	0.8257	9.31683	0.87085
9.32533	3.0523	9.325	1.47645	9.32533	0.83075	9.32517	0.88545
9.33367	2.8445	9.33333	1.42655	9.33367	0.81595	9.3335	0.8784
9.342	2.6199	9.34167	1.3474	9.342	0.77775	9.34183	0.84915
9.35033	2.39755	9.35	1.24705	9.35033	0.72715	9.35017	0.8052
9.35867	2.18425	9.35833	1.1387	9.35867	0.66345	9.3585	0.7513
9.367	1.98015	9.36667	1.02355	9.367	0.59465	9.36683	0.68865
9.37533	1.7947	9.375	0.90815	9.37533	0.52185	9.37517	0.62325
9.38367	1.6284	9.38333	0.803	9.38367	0.44985	9.3835	0.55895
9.392	1.4837	9.39167	0.70705	9.392	0.38335	9.39183	0.4974
9.40033	1.3573	9.4	0.62115	9.40033	0.32385	9.40017	0.4436
9.40867	1.2523	9.40833	0.54885	9.40867	0.2714	9.4085	0.39755
9.417	1.16585	9.41667	0.4892	9.417	0.2298	9.41683	0.36065
9.42533	1.0942	9.425	0.439	9.42533	0.1936	9.42517	0.3305
9.43367	1.0356	9.43333	0.39755	9.43367	0.1623	9.4335	0.30285
9.442	0.99115	9.44167	0.3729	9.442	0.1413	9.44183	0.2846
9.45033	0.95385	9.45	0.3482	9.45033	0.12015	9.45017	0.2694
9.45867	0.9272	9.45833	0.3315	9.45867	0.10965	9.4585	0.26235
9.467	0.9033	9.46667	0.3178	9.467	0.0965	9.46683	0.25485
9.47533	0.8867	9.475	0.30885	9.47533	0.0912	9.47517	0.25325
9.48367	0.87235	9.48333	0.30315	9.48367	0.0853	9.4835	0.25225
9.492	0.86015	9.49167	0.2967	9.492	0.0793	9.49183	0.2485
9.50033	0.8509	9.5	0.2953	9.50033	0.07465	9.50017	0.2482
9.50867	0.84285	9.50833	0.2934	9.50867	0.06815	9.5085	0.2481
9.517	0.8335	9.51667	0.2909	9.517	0.0641	9.51683	0.24435
9.52533	0.82625	9.525	0.2885	9.52533	0.05935	9.52517	0.24535
9.53367	0.82165	9.53333	0.28785	9.53367	0.0575	9.5335	0.2468
9.542	0.8161	9.54167	0.28455	9.542	0.05405	9.54183	0.24635
9.55033	0.81045	9.55	0.2866	9.55033	0.0507	9.55017	0.24565
9.55867	0.80545	9.55833	0.28205	9.55867	0.04775	9.5585	0.24315
9.567	0.80285	9.56667	0.2826	9.567	0.04735	9.56683	0.245
9.57533	0.79665	9.575	0.28205	9.57533	0.0435	9.57517	0.24445
9.58367	0.7908	9.58333	0.2799	9.58367	0.0401	9.5835	0.2445
9.592	0.78745	9.59167	0.2792	9.592	0.0387	9.59183	0.24325
9.60033	0.78445	9.6	0.27935	9.60033	0.03645	9.60017	0.24235
9.60867	0.7823	9.60833	0.2805	9.60867	0.0365	9.6085	0.2443
9.617	0.7772	9.61667	0.2775	9.617	0.0336	9.61683	0.24295
9.62533	0.77535	9.625	0.2778	9.62533	0.03425	9.62517	0.24335
9.63367	0.7682	9.63333	0.27565	9.63367	0.0285	9.6335	0.24165
9.642	0.7661	9.64167	0.2739	9.642	0.0257	9.64183	0.2417
9.65033	0.76185	9.65	0.2734	9.65033	0.0239	9.65017	0.2418
9.65867	0.75765	9.65833	0.2718	9.65867	0.02055	9.6585	0.24045
9.667	0.755	9.66667	0.2715	9.667	0.0181	9.66683	0.24045
9.67533	0.7496	9.675	0.27055	9.67533	0.01565	9.67517	0.23815
9.68367	0.74635	9.68333	0.26995	9.68367	0.0122	9.6835	0.2352
9.692	0.74195	9.69167	0.27015	9.692	0.00975	9.69183	0.2364
9.70033	0.73725	9.7	0.2682	9.70033	0.0056	9.70017	0.2353
9.70867	0.73155	9.70833	0.2679	9.70867	0.00265	9.7085	0.232
9.717	0.72275	9.71667	0.2653	9.717	-0.00045	9.71683	0.22925
9.72533	0.7196	9.725	0.26275	9.72533	-0.0029	9.72517	0.2284
9.73367	0.7176	9.73333	0.26445	9.73367	-0.00205	9.7335	0.2302
9.742	0.71415	9.74167	0.26175	9.742	-0.0063	9.74183	0.22785
9.75033	0.70815	9.75	0.25805	9.75033	-0.0058	9.75017	0.22505
9.75867	0.70415	9.75833	0.25775	9.75867	-0.00805	9.7585	0.2251
9.767	0.6993	9.76667	0.25585	9.767	-0.00905	9.76683	0.2242
9.77533	0.69575	9.775	0.25575	9.77533	-0.0096	9.77517	0.2241
9.78367	0.69225	9.78333	0.25585	9.78367	-0.0083	9.7835	0.22505
9.792	0.69	9.79167	0.25515	9.792	-0.0098	9.79183	0.2259
9.80033	0.6861	9.8	0.25355	9.80033	-0.00945	9.80017	0.22515
9.80867	0.68445	9.80833	0.2525	9.80867	-0.00845	9.8085	0.2271
9.817	0.6809	9.81667	0.25095	9.817	-0.0079	9.81683	0.2276
9.82533	0.67625	9.825	0.24875	9.82533	-0.01185	9.82517	0.2261
9.83367	0.6716	9.83333	0.2476	9.83367	-0.01165	9.8335	0.22585
9.842	0.66875	9.84167	0.2471	9.842	-0.0127	9.84183	0.2231
9.85033	0.6634	9.85	0.24635	9.85033	-0.01305	9.85017	0.223
9.85867	0.66125	9.85833	0.244	9.85867	-0.01565	9.8585	0.22135
9.867	0.65615	9.86667	0.24285	9.867	-0.0148	9.86683	0.2192
9.87533	0.65225	9.875	0.2406	9.87533	-0.01785	9.87517	0.21675
9.88367	0.65105	9.88333	0.2405	9.88367	-0.01755	9.8835	0.21865
9.892	0.64585	9.89167	0.23905	9.892	-0.01845	9.89183	0.21525
9.90033	0.6406	9.9	0.2356	9.90033	-0.01975	9.90017	0.2151
9.90867	0.6375	9.90833	0.23335	9.90867	-0.0238	9.9085	0.2122
9.917	0.6357	9.91667	0.2344	9.917	-0.02255	9.91683	0.2127
9.92533	0.63335	9.925	0.23335	9.92533	-0.02105	9.92517	0.21155
9.93367	0.6286	9.93333	0.229	9.93367	-0.022	9.9335	0.2094
9.942	0.62495	9.94167	0.22745	9.942	-0.02185	9.94183	0.2084
9.95033	0.62005	9.95	0.22515	9.95033	-0.02245	9.95017	0.2056
9.95867	0.6166	9.95833	0.22375	9.95867	-0.0202	9.9585	0.2058
9.967	0.61115	9.96667	0.22135	9.967	-0.02105	9.96683	0.20475
9.97533	0.6092	9.975	0.2202	9.97533	-0.01935	9.97517	0.2041
9.98367	0.60575	9.98333	0.21895	9.98367	-0.01925	9.9835	0.2035
9.992	0.6038	9.99167	0.21765	9.992	-0.01645	9.99183	0.2052
10.0003	0.5981	10	0.21455	10.0003	-0.0175	10.0002	0.20405
10.0087	0.59525	10.0083	0.2145	10.0087	-0.0169	10.0085	0.2036
10.017	0.5927	10.0167	0.2131	10.017	-0.01555	10.0168	0.20395
10.0253	0.5892	10.025	0.2107	10.0253	-0.01535	10.0252	0.20285
10.0337	0.58675	10.0333	0.2097	10.0337	-0.016	10.0335	0.20305
10.042	0.58095	10.0417	0.20685	10.042	-0.0182	10.0418	0.20085
10.0503	0.5796	10.05	0.20495	10.0503	-0.0165	10.0502	0.20015
10.0587	0.5757	10.0583	0.20235	10.0587	-0.01805	10.0585	0.19855
10.067	0.5725	10.0667	0.20075	10.067	-0.01915	10.0668	0.19565
10.0753	0.5696	10.075	0.19975	10.0753	-0.0194	10.0752	0.1954
10.0837	0.5661	10.0833	0.19735	10.0837	-0.0199	10.0835	0.1938
10.092	0.56105	10.0917	0.1936	10.092	-0.02285	10.0918	0.1921
10.1003	0.5596	10.1	0.1932	10.1003	-0.0222	10.1002	0.18965
10.1087	0.56	10.1083	0.19345	10.1087	-0.02155	10.1085	0.18945
10.117	0.55815	10.1167	0.19535	10.117	-0.02	10.1168	0.1895
10.1253	0.5581	10.125	0.19075	10.1253	-0.01995	10.1252	0.18745
10.1337	0.5558	10.1333	0.1901	10.1337	-0.01975	10.1335	0.1846
10.142	0.5553	10.1417	0.18905	10.142	-0.0188	10.1418	0.18445
10.1503	0.5528	10.15	0.18715	10.1503	-0.01835	10.1502	0.182
10.1587	0.5542	10.1583	0.1869	10.1587	-0.01765	10.1585	0.18245
10.167	0.5551	10.1667	0.18765	10.167	-0.01495	10.1668	0.1838
10.1753	0.5553	10.175	0.1886	10.1753	-0.0128	10.1752	0.1847
10.1837	0.55605	10.1833	0.18625	10.1837	-0.0129	10.1835	0.1842
10.192	0.55825	10.1917	0.1868	10.192	-0.0095	10.1918	0.186
10.2003	0.55715	10.2	0.18495	10.2003	-0.01175	10.2002	0.1847
10.2087	0.5556	10.2083	0.1834	10.2087	-0.0096	10.2085	0.18405
10.217	0.55585	10.2167	0.1838	10.217	-0.00765	10.2168	0.18485
10.2253	0.5558	10.225	0.1834	10.2253	-0.00765	10.2252	0.1849
10.2337	0.55385	10.2333	0.18255	10.2337	-0.00485	10.2335	0.186
10.242	0.55295	10.2417	0.18415	10.242	-0.0023	10.2418	0.18525
10.2503	0.5513	10.25	0.18395	10.2503	-0.0027	10.2502	0.1853
10.2587	0.5489	10.2583	0.1837	10.2587	-0.0026	10.2585	0.1864
10.267	0.5436	10.2667	0.17985	10.267	-0.00455	10.2668	0.1844
10.2753	0.5404	10.275	0.17925	10.2753	-0.001	10.2752	0.18615
10.2837	0.5362	10.2833	0.1758	10.2837	0.0004	10.2835	0.18605
10.292	0.53265	10.2917	0.17705	10.292	0.0033	10.2918	0.1862
10.3003	0.5319	10.3	0.17735	10.3003	0.00535	10.3002	0.18625
10.3087	0.5266	10.3083	0.17285	10.3087	0.0037	10.3085	0.1839
10.317	0.5256	10.3167	0.17105	10.317	0.0072	10.3168	0.1856
10.3253	0.52345	10.325	0.1702	10.3253	0.00885	10.3252	0.1853
10.3337	0.52135	10.3333	0.16885	10.3337	0.0113	10.3335	0.18695
10.342	0.5196	10.3417	0.1675	10.342	0.01315	10.3418	0.18845
10.3503	0.5185	10.35	0.16805	10.3503	0.01735	10.3502	0.19045
10.3587	0.5178	10.3583	0.1671	10.3587	0.01975	10.3585	0.19075
10.367	0.51825	10.3667	0.1658	10.367	0.02155	10.3668	0.1915
10.3753	0.51895	10.375	0.16595	10.3753	0.02735	10.3752	0.1943
10.3837	0.51905	10.3833	0.16455	10.3837	0.0265	10.3835	0.19545
10.392	0.51865	10.3917	0.1659	10.392	0.0294	10.3918	0.19595
10.4003	0.5194	10.4	0.166	10.4003	0.03155	10.4002	0.1979
10.4087	0.51645	10.4083	0.1646	10.4087	0.03155	10.4085	0.196
10.417	0.51675	10.4167	0.1638	10.417	0.035	10.4168	0.19835
10.4253	0.51505	10.425	0.16425	10.4253	0.03755	10.4252	0.19995
10.4337	0.5111	10.4333	0.16105	10.4337	0.0366	10.4335	0.1952
10.442	0.5113	10.4417	0.16255	10.442	0.0398	10.4418	0.19875
10.4503	0.5059	10.45	0.1604	10.4503	0.03805	10.4502	0.19915
10.4587	0.503	10.4583	0.15785	10.4587	0.0393	10.4585	0.1982
10.467	0.4985	10.4667	0.1557	10.467	0.0401	10.4668	0.1965
10.4753	0.4962	10.475	0.15645	10.4753	0.0407	10.4752	0.19615
10.4837	0.49345	10.4833	0.1545	10.4837	0.0429	10.4835	0.19535
10.492	0.4894	10.4917	0.14995	10.492	0.04215	10.4918	0.1916
10.5003	0.48645	10.5	0.14675	10.5003	0.04085	10.5002	0.1878
10.5087	0.4839	10.5083	0.1442	10.5087	0.0409	10.5085	0.1865
10.517	0.48165	10.5167	0.14345	10.517	0.04235	10.5168	0.18495
10.5253	0.4786	10.525	0.1409	10.5253	0.04265	10.5252	0.18225
10.5337	0.47695	10.5333	0.1394	10.5337	0.0421	10.5335	0.18145
10.542	0.47625	10.5417	0.13745	10.542	0.0442	10.5418	0.1784
10.5503	0.4792	10.55	0.13795	10.5503	0.0453	10.5502	0.17995
10.5587	0.48055	10.5583	0.13505	10.5587	0.04725	10.5585	0.1783
10.567	0.4826	10.5667	0.13265	10.567	0.04645	10.5668	0.17445
10.5753	0.4892	10.575	0.13155	10.5753	0.0466	10.5752	0.17535
10.5837	0.50085	10.5833	0.12905	10.5837	0.04815	10.5835	0.17335
10.592	0.51385	10.5917	0.12775	10.592	0.04895	10.5918	0.17285
10.6003	0.53795	10.6	0.12775	10.6003	0.05115	10.6002	0.17215
10.6087	0.57645	10.6083	0.1265	10.6087	0.0506	10.6085	0.17165
10.617	0.63645	10.6167	0.1256	10.617	0.05585	10.6168	0.1716
10.6253	0.7199	10.625	0.12635	10.6253	0.06025	10.6252	0.1757
10.6337	0.8066	10.6333	0.12585	10.6337	0.06665	10.6335	0.18435
10.642	0.85295	10.6417	0.125	10.642	0.07855	10.6418	0.20105
10.6503	0.8479	10.65	0.12395	10.6503	0.09785	10.6502	0.2223
10.6587	0.82545	10.6583	0.12355	10.6587	0.1286	10.6585	0.25115
10.667	0.8053	10.6667	0.1288	10.667	0.1597	10.6668	0.2754
10.6753	0.78315	10.675	0.12975	10.6753	0.16955	10.6752	0.27605
10.6837	0.74545	10.6833	0.13025	10.6837	0.1598	10.6835	0.2628
10.692	0.6845	10.6917	0.13575	10.692	0.1434	10.6918	0.2442
10.7003	0.61315	10.7	0.14765	10.7003	0.12845	10.7002	0.22795
10.7087	0.5533	10.7083	0.16985	10.7087	0.11875	10.7085	0.22125
10.717	0.50845	10.7167	0.19435	10.717	0.1018	10.7168	0.21165
10.7253	0.4612	10.725	0.2166	10.7253	0.078	10.7252	0.1988
10.7337	0.47355	10.7333	0.21615	10.7337	0.0504	10.7335	0.178
10.742	1.07675	10.7417	0.2046	10.742	0.03215	10.7418	0.1593
10.7503	2.09905	10.75	0.1913	10.7503	0.0213	10.7502	0.1459
10.7587	3.0132	10.7583	0.1804	10.7587	-0.0052	10.7585	0.1286
10.767	3.69615	10.7667	0.16625	10.767	0.00775	10.7668	0.4074
10.7753	4.1912	10.775	0.1543	10.7753	0.53915	10.7752	1.21375
10.7837	4.56915	10.7833	0.12825	10.7837	1.47185	10.7835	2.1075
10.792	4.89105	10.7917	0.10645	10.792	2.34815	10.7918	2.8352
10.8003	5.1524	10.8	0.08555	10.8003	3.02685	10.8002	3.3757
10.8087	5.34345	10.8083	0.07465	10.8087	3.5329	10.8085	3.78065
10.817	5.4734	10.8167	0.06885	10.817	3.92985	10.8168	4.0952
10.8253	5.55915	10.825	0.05	10.8253	4.277	10.8252	4.3641
10.8337	5.6147	10.8333	0.11865	10.8337	4.5659	10.8335	4.60535
10.842	5.6553	10.8417	0.729	10.842	4.78375	10.8418	4.81545
10.8503	5.68665	10.85	1.65115	10.8503	4.9368	10.8502	4.9756
10.8587	5.70885	10.8583	2.46865	10.8587	5.0422	10.8585	5.08425
10.867	5.72385	10.8667	3.0849	10.867	5.1164	10.8668	5.1576
10.8753	5.7338	10.875	3.5357	10.8753	5.1664	10.8752	5.2069
10.8837	5.74285	10.8833	3.8873	10.8837	5.2068	10.8835	5.24555
10.892	5.7445	10.8917	4.18645	10.892	5.2371	10.8918	5.27015
10.9003	5.7464	10.9	4.44475	10.9003	5.2596	10.9002	5.29165
10.9087	5.7477	10.9083	4.6463	10.9087	5.2783	10.9085	5.305
10.917	5.7478	10.9167	4.78535	10.917	5.29175	10.9168	5.31645
10.9253	5.7473	10.925	4.8776	10.9253	5.3023	10.9252	5.3247
10.9337	5.7457	10.9333	4.9396	10.9337	5.31105	10.9335	5.32895
10.942	5.74275	10.9417	4.98265	10.942	5.3147	10.9418	5.33385
10.9503	5.74065	10.95	5.01295	10.9503	5.3204	10.9502	5.3378
10.9587	5.7382	10.9583	5.0334	10.9587	5.3236	10.9585	5.33885
10.967	5.73645	10.9667	5.0491	10.967	5.3284	10.9668	5.34215
10.9753	5.7331	10.975	5.05875	10.9753	5.33085	10.9752	5.34365
10.9837	5.73035	10.9833	5.0643	10.9837	5.3353	10.9835	5.3457
10.992	5.7253	10.9917	5.06755	10.992	5.33735	10.9918	5.34395
11.0003	5.72505	11	5.0712	11.0003	5.34135	11.0002	5.3454
11.0087	5.71905	11.0083	5.0702	11.0087	5.3409	11.0085	5.34475
11.017	5.71445	11.0167	5.07105	11.017	5.34355	11.0168	5.34605
11.0253	5.70695	11.025	5.06765	11.0253	5.34335	11.0252	5.3441
11.0337	5.7012	11.0333	5.0645	11.0337	5.34455	11.0335	5.34285
11.042	5.69645	11.0417	5.0656	11.042	5.34685	11.0418	5.34245
11.0503	5.68845	11.05	5.0655	11.0503	5.34615	11.0502	5.3402
11.0587	5.68125	11.0583	5.0597	11.0587	5.34425	11.0585	5.33455
11.067	5.67375	11.0667	5.057	11.067	5.3443	11.0668	5.33065
11.0753	5.6659	11.075	5.05565	11.0753	5.34365	11.0752	5.325
11.0837	5.65865	11.0833	5.0546	11.0837	5.34085	11.0835	5.3226
11.092	5.6496	11.0917	5.05175	11.092	5.33755	11.0918	5.31775
11.1003	5.6425	11.1	5.0506	11.1003	5.33525	11.1002	5.31145
11.1087	5.63415	11.1083	5.04725	11.1087	5.33215	11.1085	5.3047
11.117	5.6273	11.1167	5.0412	11.117	5.32625	11.1168	5.29685
11.1253	5.6229	11.125	5.0362	11.1253	5.3239	11.1252	5.29185
11.1337	5.61695	11.1333	5.0289	11.1337	5.3174	11.1335	5.28325
11.142	5.61345	11.1417	5.02325	11.142	5.3138	11.1418	5.2773
11.1503	5.60625	11.15	5.01305	11.1503	5.30825	11.1502	5.26935
11.1587	5.6032	11.1583	5.00515	11.1587	5.30565	11.1585	5.26205
11.167	5.59885	11.1667	4.99465	11.167	5.301	11.1668	5.2539
11.1753	5.5961	11.175	4.9863	11.1753	5.3007	11.1752	5.246
11.1837	5.59345	11.1833	4.9759	11.1837	5.29895	11.1835	5.23875
11.192	5.5914	11.1917	4.9655	11.192	5.2984	11.1918	5.23465
11.2003	5.58775	11.2	4.9535	11.2003	5.29515	11.2002	5.22575
11.2087	5.58315	11.2083	4.9417	11.2087	5.2947	11.2085	5.22005
11.217	5.5788	11.2167	4.9315	11.217	5.29735	11.2168	5.2127
11.2253	5.57315	11.225	4.91805	11.2253	5.299	11.2252	5.20615
11.2337	5.56735	11.2333	4.90885	11.2337	5.30225	11.2335	5.19885
11.242	5.56055	11.2417	4.89605	11.242	5.30575	11.2418	5.19305
11.2503	5.54915	11.25	4.88125	11.2503	5.30555	11.2502	5.1835
11.2587	5.53835	11.2583	4.871	11.2587	5.3059	11.2585	5.1761
11.267	5.52645	11.2667	4.8625	11.267	5.30795	11.2668	5.167
11.2753	5.51105	11.275	4.85075	11.2753	5.305	11.2752	5.1597
11.2837	5.4929	11.2833	4.8382	11.2837	5.30125	11.2835	5.14905
11.292	5.478	11.2917	4.8316	11.292	5.2983	11.2918	5.1412
11.3003	5.45875	11.3	4.82085	11.3003	5.29065	11.3002	5.13145
11.3087	5.4386	11.3083	4.8098	11.3087	5.28135	11.3085	5.1204
11.317	5.4185	11.3167	4.80245	11.317	5.27115	11.3168	5.1084
11.3253	5.39545	11.325	4.79415	11.3253	5.25245	11.3252	5.0951
11.3337	5.37225	11.3333	4.7858	11.3337	5.2369	11.3335	5.08165
11.342	5.3517	11.3417	4.77995	11.342	5.21965	11.3418	5.06695
11.3503	5.3266	11.35	4.7735	11.3503	5.19865	11.3502	5.05085
11.3587	5.3041	11.3583	4.7678	11.3587	5.17825	11.3585	5.03545
11.367	5.28365	11.3667	4.7622	11.367	5.1582	11.3668	5.0179
11.3753	5.25865	11.375	4.7565	11.3753	5.13205	11.3752	4.9993
11.3837	5.239	11.3833	4.75325	11.3837	5.1315	11.3835	4.9834
11.392	5.218	11.3917	4.74685	11.392	5.0847	11.3918	4.96545
11.4003	5.1973	11.4	4.74405	11.4003	5.06225	11.4002	4.9513
11.4087	5.1742	11.4083	4.73305	11.4087	5.03555	11.4085	4.9302
11.417	5.15505	11.4167	4.72695	11.417	5.01305	11.4168	4.91295
11.4253	5.13585	11.425	4.71835	11.4253	4.9904	11.4252	4.8932
11.4337	5.1157	11.4333	4.704	11.4337	4.96795	11.4335	4.8736
11.442	5.09625	11.4417	4.6922	11.442	4.94665	11.4418	4.85255
11.4503	5.077	11.45	4.67855	11.4503	4.92385	11.4502	4.834
11.4587	5.0551	11.4583	4.6611	11.4587	4.9021	11.4585	4.81395
11.467	5.03835	11.4667	4.64395	11.467	4.8852	11.4668	4.7951
11.4753	5.02005	11.475	4.6282	11.4753	4.8676	11.4752	4.77905
11.4837	5.0012	11.4833	4.60655	11.4837	4.8479	11.4835	4.7611
11.492	4.9824	11.4917	4.5847	11.492	4.83175	11.4918	4.74445
11.5003	4.9665	11.5	4.56385	11.5003	4.81295	11.5002	4.728
11.5087	4.94495	11.5083	4.53775	11.5087	4.79245	11.5085	4.70885
11.517	4.9261	11.5167	4.5128	11.517	4.77255	11.5168	4.68955
11.5253	4.9083	11.525	4.487	11.5253	4.758	11.5252	4.67175
11.5337	4.8897	11.5333	4.4623	11.5337	4.73965	11.5335	4.65405
11.542	4.87135	11.5417	4.437	11.542	4.7233	11.5418	4.63905
11.5503	4.8525	11.55	4.4111	11.5503	4.70585	11.5502	4.61895
11.5587	4.83405	11.5583	4.3871	11.5587	4.6885	11.5585	4.60105
11.567	4.81725	11.5667	4.3613	11.567	4.67115	11.5668	4.5842
11.5753	4.7969	11.575	4.3361	11.5753	4.6531	11.5752	4.5658
11.5837	4.77645	11.5833	4.31045	11.5837	4.63245	11.5835	4.54565
11.592	4.7579	11.5917	4.28655	11.592	4.6149	11.5918	4.52585
11.6003	4.743	11.6	4.26515	11.6003	4.60045	11.6002	4.5091
11.6087	4.72195	11.6083	4.2435	11.6087	4.58255	11.6085	4.4895
11.617	4.7025	11.6167	4.21945	11.617	4.5649	11.6168	4.46955
11.6253	4.68525	11.625	4.1973	11.6253	4.54755	11.6252	4.45185
11.6337	4.6663	11.6333	4.1768	11.6337	4.5311	11.6335	4.43365
11.642	4.6459	11.6417	4.15705	11.642	4.51435	11.6418	4.41595
11.6503	4.6249	11.65	4.13355	11.6503	4.4966	11.6502	4.3936
11.6587	4.60695	11.6583	4.11345	11.6587	4.48025	11.6585	4.3764
11.667	4.5899	11.6667	4.09565	11.667	4.4642	11.6668	4.35935
11.6753	4.57215	11.675	4.0756	11.6753	4.44685	11.6752	4.34125
11.6837	4.55435	11.6833	4.05495	11.6837	4.43245	11.6835	4.32215
11.692	4.53465	11.6917	4.03535	11.692	4.41305	11.6918	4.3046
11.7003	4.51595	11.7	4.017	11.7003	4.39735	11.7002	4.2868
11.7087	4.49455	11.7083	3.9945	11.7087	4.3766	11.7085	4.2669
11.717	4.47555	11.7167	3.97375	11.717	4.3623	11.7168	4.24935
11.7253	4.45685	11.725	3.95315	11.7253	4.34545	11.7252	4.2303
11.7337	4.43845	11.7333	3.935	11.7337	4.3294	11.7335	4.2146
11.742	4.4161	11.7417	3.91175	11.742	4.30955	11.7418	4.1946
11.7503	4.39825	11.75	3.89315	11.7503	4.29375	11.7502	4.17625
11.7587	4.3774	11.7583	3.8702	11.7587	4.2738	11.7585	4.1557
11.767	4.3541	11.7667	3.84805	11.767	4.25345	11.7668	4.1364
11.7753	4.3279	11.775	3.8251	11.7753	4.2332	11.7752	4.11565
11.7837	4.30475	11.7833	3.8012	11.7837	4.21105	11.7835	4.09305
11.792	4.28185	11.7917	3.77755	11.792	4.19085	11.7918	4.0735
11.8003	4.2546	11.8	3.75295	11.8003	4.16635	11.8002	4.0488
11.8087	4.22725	11.8083	3.7242	11.8087	4.14175	11.8085	4.0232
11.817	4.19675	11.8167	3.6977	11.817	4.11495	11.8168	3.9959
11.8253	4.16645	11.825	3.6701	11.8253	4.09075	11.8252	3.9706
11.8337	4.13525	11.8333	3.64095	11.8337	4.06205	11.8335	3.94375
11.842	4.1051	11.8417	3.61195	11.842	4.0345	11.8418	3.91565
11.8503	4.07195	11.85	3.58185	11.8503	4.0059	11.8502	3.88585
11.8587	4.0397	11.8583	3.55345	11.8587	3.9779	11.8585	3.858
11.867	4.0057	11.8667	3.5209	11.867	3.94605	11.8668	3.8263
11.8753	3.9708	11.875	3.4872	11.8753	3.91445	11.8752	3.7942
11.8837	3.9367	11.8833	3.45725	11.8837	3.88205	11.8835	3.7634
11.892	3.89945	11.8917	3.4249	11.892	3.8483	11.8918	3.7292
11.9003	3.8625	11.9	3.3908	11.9003	3.81445	11.9002	3.69555
11.9087	3.8266	11.9083	3.3594	11.9087	3.78265	11.9085	3.6616
11.917	3.78885	11.9167	3.32575	11.917	3.7459	11.9168	3.62795
11.9253	3.7524	11.925	3.29195	11.9253	3.71405	11.9252	3.59165
11.9337	3.71455	11.9333	3.25925	11.9337	3.6786	11.9335	3.55445
11.942	3.67825	11.9417	3.2272	11.942	3.6448	11.9418	3.5198
11.9503	3.6381	11.95	3.19245	11.9503	3.6068	11.9502	3.48315
11.9587	3.59785	11.9583	3.1571	11.9587	3.5716	11.9585	3.44565
11.967	3.5595	11.9667	3.12255	11.967	3.53645	11.9668	3.4104
11.9753	3.5191	11.975	3.0887	11.9753	3.49955	11.9752	3.37445
11.9837	3.48165	11.9833	3.05465	11.9837	3.4635	11.9835	3.3369
11.992	3.44165	11.9917	3.0176	11.992	3.4274	11.9918	3.2984
12.0003	3.39985	12	2.9805	12.0003	3.38995	12.0002	3.25815
12.0087	3.36055	12.0083	2.9448	12.0087	3.35475	12.0085	3.22225
12.017	3.3201	12.0167	2.91055	12.017	3.3193	12.0168	3.18305
12.0253	3.27815	12.025	2.87175	12.0253	3.28225	12.0252	3.1464
12.0337	3.23505	12.0333	2.834	12.0337	3.24445	12.0335	3.1072
12.042	3.19445	12.0417	2.7982	12.042	3.20635	12.0418	3.066
12.0503	3.15295	12.05	2.75605	12.0503	3.1696	12.0502	3.02865
12.0587	3.11	12.0583	2.7164	12.0587	3.13105	12.0585	2.99
12.067	3.066	12.0667	2.6748	12.067	3.08995	12.0668	2.94795
12.0753	3.0215	12.075	2.63155	12.0753	3.04715	12.0752	2.90765
12.0837	2.9779	12.0833	2.59075	12.0837	3.0078	12.0835	2.8673
12.092	2.93265	12.0917	2.5468	12.092	2.96535	12.0918	2.8243
12.1003	2.8871	12.1	2.50315	12.1003	2.9243	12.1002	2.78125
12.1087	2.8434	12.1083	2.45935	12.1087	2.88355	12.1085	2.74075
12.117	2.79725	12.1167	2.4145	12.117	2.8407	12.1168	2.6951
12.1253	2.75345	12.125	2.3716	12.1253	2.79945	12.1252	2.65625
12.1337	2.7121	12.1333	2.32855	12.1337	2.75545	12.1335	2.61445
12.142	2.6654	12.1417	2.2836	12.142	2.7124	12.1418	2.5722
12.1503	2.62225	12.15	2.241	12.1503	2.67445	12.1502	2.53105
12.1587	2.5789	12.1583	2.1972	12.1587	2.6318	12.1585	2.4893
12.167	2.5384	12.1667	2.15665	12.167	2.5935	12.1668	2.4507
12.1753	2.49685	12.175	2.11375	12.1753	2.5533	12.1752	2.4112
12.1837	2.4533	12.1833	2.07115	12.1837	2.5134	12.1835	2.368
12.192	2.4118	12.1917	2.03115	12.192	2.4737	12.1918	2.3287
12.2003	2.37125	12.2	1.98885	12.2003	2.4344	12.2002	2.28875
12.2087	2.32785	12.2083	1.9472	12.2087	2.39705	12.2085	2.2497
12.217	2.28645	12.2167	1.9068	12.217	2.35705	12.2168	2.20865
12.2253	2.2462	12.225	1.8672	12.2253	2.3189	12.2252	2.171
12.2337	2.2047	12.2333	1.82575	12.2337	2.2819	12.2335	2.13375
12.242	2.16315	12.2417	1.7829	12.242	2.2437	12.2418	2.0943
12.2503	2.1243	12.25	1.74155	12.2503	2.20325	12.2502	2.0563
12.2587	2.0815	12.2583	1.69965	12.2587	2.1657	12.2585	2.01565
12.267	2.0397	12.2667	1.6586	12.267	2.12435	12.2668	1.9753
12.2753	1.998	12.275	1.61555	12.2753	2.0865	12.2752	1.93405
12.2837	1.95545	12.2833	1.57505	12.2837	2.04725	12.2835	1.8932
12.292	1.9139	12.2917	1.53255	12.292	2.00835	12.2918	1.85505
12.3003	1.8722	12.3	1.49155	12.3003	1.96955	12.3002	1.81335
12.3087	1.8293	12.3083	1.4503	12.3087	1.9275	12.3085	1.7708
12.317	1.78685	12.3167	1.4056	12.317	1.8858	12.3168	1.7277
12.3253	1.7431	12.325	1.3637	12.3253	1.84375	12.3252	1.68685
12.3337	1.69905	12.3333	1.32385	12.3337	1.8026	12.3335	1.6462
12.342	1.65375	12.3417	1.28015	12.342	1.76055	12.3418	1.60205
12.3503	1.6121	12.35	1.2383	12.3503	1.71865	12.3502	1.5603
12.3587	1.56785	12.3583	1.1984	12.3587	1.67735	12.3585	1.51725
12.367	1.5272	12.3667	1.15945	12.367	1.63875	12.3668	1.4766
12.3753	1.4843	12.375	1.11675	12.3753	1.5979	12.3752	1.4332
12.3837	1.44075	12.3833	1.0766	12.3837	1.55565	12.3835	1.39085
12.392	1.39925	12.3917	1.03825	12.392	1.5169	12.3918	1.35045
12.4003	1.35795	12.4	0.9992	12.4003	1.47685	12.4002	1.31065
12.4087	1.318	12.4083	0.9641	12.4087	1.4396	12.4085	1.2718
12.417	1.2808	12.4167	0.9282	12.417	1.40325	12.4168	1.23285
12.4253	1.23985	12.425	0.8905	12.4253	1.36415	12.4252	1.195
12.4337	1.203	12.4333	0.85465	12.4337	1.3321	12.4335	1.15785
12.442	1.16645	12.4417	0.8197	12.442	1.29385	12.4418	1.12025
12.4503	1.1311	12.45	0.78645	12.4503	1.261	12.4502	1.0856
12.4587	1.09395	12.4583	0.7543	12.4587	1.22425	12.4585	1.0494
12.467	1.0594	12.4667	0.72215	12.467	1.19245	12.4668	1.0141
12.4753	1.0288	12.475	0.6903	12.4753	1.1596	12.4752	0.9818
12.4837	0.9951	12.4833	0.6606	12.4837	1.1283	12.4835	0.95035
12.492	0.9642	12.4917	0.63155	12.492	1.0963	12.4918	0.91535
12.5003	0.93395	12.5	0.6045	12.5003	1.0653	12.5002	0.8839
12.5087	0.9045	12.5083	0.57725	12.5087	1.0343	12.5085	0.85415
12.517	0.87265	12.5167	0.54985	12.517	1.003	12.5168	0.82295
12.5253	0.84565	12.525	0.52575	12.5253	0.97625	12.5252	0.79395
12.5337	0.81815	12.5333	0.50035	12.5337	0.94725	12.5335	0.76575
12.542	0.79245	12.5417	0.47835	12.542	0.92165	12.5418	0.7382
12.5503	0.76815	12.55	0.4558	12.5503	0.89505	12.5502	0.7118
12.5587	0.74135	12.5583	0.43255	12.5587	0.87135	12.5585	0.6836
12.567	0.71905	12.5667	0.41125	12.567	0.8466	12.5668	0.65825
12.5753	0.6972	12.575	0.39395	12.5753	0.82455	12.5752	0.63415
12.5837	0.6741	12.5833	0.3744	12.5837	0.8015	12.5835	0.6106
12.592	0.65375	12.5917	0.3561	12.592	0.78235	12.5918	0.5903
12.6003	0.63305	12.6	0.33975	12.6003	0.761	12.6002	0.56935
12.6087	0.6157	12.6083	0.3242	12.6087	0.74535	12.6085	0.55095
12.617	0.59735	12.6167	0.3079	12.617	0.72595	12.6168	0.53135
12.6253	0.5812	12.625	0.29425	12.6253	0.7096	12.6252	0.51485
12.6337	0.5629	12.6333	0.2785	12.6337	0.6914	12.6335	0.4977
12.642	0.54515	12.6417	0.263	12.642	0.67405	12.6418	0.47855
12.6503	0.53245	12.65	0.2507	12.6503	0.6603	12.6502	0.46475
12.6587	0.51815	12.6583	0.23795	12.6587	0.64775	12.6585	0.4494
12.667	0.504	12.6667	0.2273	12.667	0.6334	12.6668	0.4384
12.6753	0.49205	12.675	0.2162	12.6753	0.61845	12.6752	0.42245
12.6837	0.4794	12.6833	0.203	12.6837	0.60635	12.6835	0.4069
12.692	0.4688	12.6917	0.19335	12.692	0.5957	12.6918	0.39555
12.7003	0.4557	12.7	0.18335	12.7003	0.58175	12.7002	0.3846
12.7087	0.4445	12.7083	0.17455	12.7087	0.57175	12.7085	0.3732
12.717	0.4333	12.7167	0.16515	12.717	0.5592	12.7168	0.36175
12.7253	0.4251	12.725	0.15745	12.7253	0.5495	12.7252	0.35285
12.7337	0.41725	12.7333	0.15175	12.7337	0.5452	12.7335	0.3434
12.742	0.40725	12.7417	0.14155	12.742	0.53345	12.7418	0.33305
12.7503	0.39945	12.75	0.13205	12.7503	0.5263	12.7502	0.3251
12.7587	0.3876	12.7583	0.1247	12.7587	0.51575	12.7585	0.31495
12.767	0.38095	12.7667	0.1194	12.767	0.5106	12.7668	0.3075
12.7753	0.37265	12.775	0.11195	12.7753	0.50345	12.7752	0.2981
12.7837	0.3651	12.7833	0.1057	12.7837	0.49755	12.7835	0.29045
12.792	0.3595	12.7917	0.09985	12.792	0.49115	12.7918	0.28505
12.8003	0.3535	12.8	0.0963	12.8003	0.488	12.8002	0.28075
12.8087	0.3464	12.8083	0.08675	12.8087	0.4831	12.8085	0.27355
12.817	0.34	12.8167	0.08285	12.817	0.4772	12.8168	0.26705
12.8253	0.33555	12.825	0.07665	12.8253	0.46965	12.8252	0.26175
12.8337	0.3305	12.8333	0.0723	12.8337	0.4666	12.8335	0.2565
12.842	0.32385	12.8417	0.06735	12.842	0.46145	12.8418	0.25235
12.8503	0.3191	12.85	0.0636	12.8503	0.458	12.8502	0.24725
12.8587	0.31365	12.8583	0.05715	12.8587	0.45455	12.8585	0.2413
12.867	0.30625	12.8667	0.05325	12.867	0.44895	12.8668	0.2354
12.8753	0.306	12.875	0.0484	12.8753	0.4449	12.8752	0.231
12.8837	0.3026	12.8833	0.046	12.8837	0.4414	12.8835	0.2288
12.892	0.29535	12.8917	0.04155	12.892	0.43655	12.8918	0.2239
12.9003	0.29045	12.9	0.0394	12.9003	0.43245	12.9002	0.21975
12.9087	0.2856	12.9083	0.03305	12.9087	0.42795	12.9085	0.21525
12.917	0.28195	12.9167	0.0304	12.917	0.42765	12.9168	0.2112
12.9253	0.27905	12.925	0.02875	12.9253	0.42515	12.9252	0.2073
12.9337	0.27385	12.9333	0.0209	12.9337	0.4205	12.9335	0.2027
12.942	0.2684	12.9417	0.01875	12.942	0.4171	12.9418	0.1982
12.9503	0.26385	12.95	0.015	12.9503	0.4145	12.9502	0.195
12.9587	0.25885	12.9583	0.0112	12.9587	0.41185	12.9585	0.1924
12.967	0.25595	12.9667	0.00795	12.967	0.4083	12.9668	0.18815
12.9753	0.25315	12.975	0.0072	12.9753	0.40585	12.9752	0.1859
12.9837	0.2524	12.9833	0.00425	12.9837	0.4045	12.9835	0.1834
12.992	0.2478	12.9917	0.00095	12.992	0.4028	12.9918	0.1803
13.0003	0.2453	13	-0.00295	13.0003	0.40025	13.0002	0.17705
13.0087	0.24095	13.0083	-0.0063	13.0087	0.396	13.0085	0.17405
13.017	0.24025	13.0167	-0.0078	13.017	0.396	13.0168	0.1741
13.0253	0.2364	13.025	-0.0118	13.0253	0.39385	13.0252	0.1699
13.0337	0.2321	13.0333	-0.01475	13.0337	0.3911	13.0335	0.1644
13.042	0.22935	13.0417	-0.0174	13.042	0.3883	13.0418	0.1638
13.0503	0.2275	13.05	-0.0203	13.0503	0.38585	13.0502	0.1603
13.0587	0.2245	13.0583	-0.02155	13.0587	0.3851	13.0585	0.15695
13.067	0.2222	13.0667	-0.02325	13.067	0.381	13.0668	0.15355
13.0753	0.22255	13.075	-0.02545	13.0753	0.38075	13.0752	0.1537
13.0837	0.21785	13.0833	-0.02845	13.0837	0.37835	13.0835	0.14965
13.092	0.21495	13.0917	-0.03165	13.092	0.37425	13.0918	0.14565
13.1003	0.21425	13.1	-0.0334	13.1003	0.3741	13.1002	0.14635
13.1087	0.2112	13.1083	-0.036	13.1087	0.37175	13.1085	0.1441
13.117	0.20875	13.1167	-0.03915	13.117	0.36885	13.1168	0.14035
13.1253	0.2063	13.125	-0.04265	13.1253	0.36715	13.1252	0.13705
13.1337	0.2051	13.1333	-0.04165	13.1337	0.36685	13.1335	0.1344
13.142	0.20215	13.1417	-0.0456	13.142	0.36485	13.1418	0.13145
13.1503	0.1982	13.15	-0.0483	13.1503	0.3626	13.1502	0.12995
13.1587	0.19605	13.1583	-0.04845	13.1587	0.3626	13.1585	0.1283
13.167	0.19555	13.1667	-0.0492	13.167	0.361	13.1668	0.129
13.1753	0.1936	13.175	-0.0512	13.1753	0.35805	13.1752	0.1251
13.1837	0.1914	13.1833	-0.0545	13.1837	0.3573	13.1835	0.1237
13.192	0.19125	13.1917	-0.0566	13.192	0.35885	13.1918	0.12255
13.2003	0.18905	13.2	-0.06065	13.2003	0.3538	13.2002	0.12095
13.2087	0.1859	13.2083	-0.0636	13.2087	0.35215	13.2085	0.1172
13.217	0.18575	13.2167	-0.0659	13.217	0.3522	13.2168	0.11615
13.2253	0.1844	13.225	-0.067	13.2253	0.3491	13.2252	0.1157
13.2337	0.1827	13.2333	-0.06815	13.2337	0.34785	13.2335	0.1151
13.242	0.1814	13.2417	-0.07075	13.242	0.3463	13.2418	0.1105
13.2503	0.1805	13.25	-0.0703	13.2503	0.3472	13.2502	0.1102
13.2587	0.17895	13.2583	-0.07315	13.2587	0.3432	13.2585	0.1078
13.267	0.17725	13.2667	-0.07585	13.267	0.34265	13.2668	0.10615
13.2753	0.17385	13.275	-0.07795	13.2753	0.33955	13.2752	0.1038
13.2837	0.17185	13.2833	-0.08045	13.2837	0.3384	13.2835	0.1016
13.292	0.1725	13.2917	-0.07865	13.292	0.33795	13.2918	0.10045
13.3003	0.16965	13.3	-0.08245	13.3003	0.33485	13.3002	0.0964
13.3087	0.1682	13.3083	-0.0855	13.3087	0.3326	13.3085	0.0934
13.317	0.1667	13.3167	-0.08745	13.317	0.3329	13.3168	0.09075
13.3253	0.16565	13.325	-0.0873	13.3253	0.3329	13.3252	0.09065
13.3337	0.1635	13.3333	-0.08905	13.3337	0.33205	13.3335	0.0881
13.342	0.1645	13.3417	-0.08995	13.342	0.33235	13.3418	0.08775
13.3503	0.1634	13.35	-0.09115	13.3503	0.3313	13.3502	0.0864
13.3587	0.16145	13.3583	-0.0928	13.3587	0.3304	13.3585	0.0851
13.367	0.16065	13.3667	-0.0937	13.367	0.3321	13.3668	0.08495
13.3753	0.15785	13.375	-0.098	13.3753	0.32805	13.3752	0.08025
13.3837	0.1589	13.3833	-0.09855	13.3837	0.3273	13.3835	0.07955
13.392	0.15595	13.3917	-0.10065	13.392	0.32785	13.3918	0.0789
13.4003	0.15445	13.4	-0.10325	13.4003	0.32555	13.4002	0.07855
13.4087	0.1552	13.4083	-0.1021	13.4087	0.32745	13.4085	0.07645
13.417	0.15365	13.4167	-0.10455	13.417	0.3247	13.4168	0.07615
13.4253	0.15135	13.425	-0.106	13.4253	0.3251	13.4252	0.0752
13.4337	0.1517	13.4333	-0.10655	13.4337	0.32425	13.4335	0.0729
13.442	0.1513	13.4417	-0.1103	13.442	0.3215	13.4418	0.0708
13.4503	0.14995	13.45	-0.10955	13.4503	0.32045	13.4502	0.06965
13.4587	0.1473	13.4583	-0.1111	13.4587	0.3199	13.4585	0.06865
13.467	0.14805	13.4667	-0.113	13.467	0.31865	13.4668	0.0681
13.4753	0.14775	13.475	-0.1132	13.4753	0.3181	13.4752	0.0655
13.4837	0.1504	13.4833	-0.1125	13.4837	0.31995	13.4835	0.06605
13.492	0.1504	13.4917	-0.11435	13.492	0.31965	13.4918	0.0648
13.5003	0.1483	13.5	-0.11685	13.5003	0.31885	13.5002	0.0632
13.5087	0.14865	13.5083	-0.1166	13.5087	0.3195	13.5085	0.0626
13.517	0.1481	13.5167	-0.1162	13.517	0.31915	13.5168	0.06085
13.5253	0.1468	13.525	-0.12015	13.5253	0.3182	13.5252	0.05825
13.5337	0.14935	13.5333	-0.1171	13.5337	0.31965	13.5335	0.0606
13.542	0.14995	13.5417	-0.11865	13.542	0.32025	13.5418	0.06035
13.5503	0.1504	13.55	-0.1206	13.5503	0.32095	13.5502	0.06065
13.5587	0.14895	13.5583	-0.1224	13.5587	0.32235	13.5585	0.0587
13.567	0.1506	13.5667	-0.12365	13.567	0.32305	13.5668	0.05915
13.5753	0.15245	13.575	-0.12445	13.5753	0.3242	13.5752	0.0594
13.5837	0.1522	13.5833	-0.1247	13.5837	0.3271	13.5835	0.05925
13.592	0.1487	13.5917	-0.12925	13.592	0.32425	13.5918	0.0557
13.6003	0.1487	13.6	-0.13015	13.6003	0.3265	13.6002	0.05745
13.6087	0.14855	13.6083	-0.13025	13.6087	0.327	13.6085	0.0576
13.617	0.1533	13.6167	-0.1295	13.617	0.3289	13.6168	0.056
13.6253	0.1549	13.625	-0.12905	13.6253	0.33035	13.6252	0.0551
13.6337	0.15365	13.6333	-0.1307	13.6337	0.3294	13.6335	0.0534
13.642	0.14885	13.6417	-0.13375	13.642	0.3297	13.6418	0.05205
13.6503	0.14945	13.65	-0.1334	13.6503	0.33105	13.6502	0.0531
13.6587	0.14605	13.6583	-0.13445	13.6587	0.3317	13.6585	0.05115
13.667	0.1421	13.6667	-0.1361	13.667	0.3318	13.6668	0.0483
13.6753	0.13845	13.675	-0.1368	13.6753	0.3338	13.6752	0.0462
13.6837	0.13585	13.6833	-0.1393	13.6837	0.33345	13.6835	0.0458
13.692	0.1341	13.6917	-0.14115	13.692	0.3346	13.6918	0.0454
13.7003	0.13035	13.7	-0.14125	13.7003	0.3358	13.7002	0.04455
13.7087	0.12585	13.7083	-0.14265	13.7087	0.3367	13.7085	0.0442
13.717	0.12285	13.7167	-0.14485	13.717	0.33695	13.7168	0.04215
13.7253	0.12095	13.725	-0.14375	13.7253	0.33635	13.7252	0.0418
13.7337	0.1175	13.7333	-0.14545	13.7337	0.33825	13.7335	0.04335
13.742	0.11635	13.7417	-0.1452	13.742	0.33845	13.7418	0.0429
13.7503	0.1163	13.75	-0.14795	13.7503	0.34065	13.7502	0.0436
13.7587	0.11365	13.7583	-0.1468	13.7587	0.3413	13.7585	0.04535
13.767	0.11215	13.7667	-0.1479	13.767	0.33975	13.7668	0.0451
13.7753	0.11155	13.775	-0.14955	13.7753	0.34115	13.7752	0.0453
13.7837	0.1114	13.7833	-0.1493	13.7837	0.34015	13.7835	0.04595
13.792	0.1099	13.7917	-0.1484	13.792	0.34215	13.7918	0.0464
13.8003	0.1108	13.8	-0.1504	13.8003	0.3427	13.8002	0.0471
13.8087	0.1119	13.8083	-0.1501	13.8087	0.3426	13.8085	0.04735
13.817	0.1123	13.8167	-0.1498	13.817	0.3412	13.8168	0.04875
13.8253	0.11585	13.825	-0.14725	13.8253	0.34435	13.8252	0.0508
13.8337	0.11475	13.8333	-0.15035	13.8337	0.34585	13.8335	0.0512
13.842	0.11655	13.8417	-0.1503	13.842	0.3457	13.8418	0.0526
13.8503	0.1208	13.85	-0.1477	13.8503	0.3492	13.8502	0.05645
13.8587	0.1255	13.8583	-0.1449	13.8587	0.3511	13.8585	0.05835
13.867	0.13025	13.8667	-0.14505	13.867	0.3539	13.8668	0.06105
13.8753	0.134	13.875	-0.1447	13.8753	0.35685	13.8752	0.0637
13.8837	0.138	13.8833	-0.14165	13.8837	0.36125	13.8835	0.06755
13.892	0.1424	13.8917	-0.13975	13.892	0.36465	13.8918	0.0724
13.9003	0.1476	13.9	-0.13635	13.9003	0.3689	13.9002	0.07685
13.9087	0.157	13.9083	-0.1309	13.9087	0.3768	13.9085	0.08355
13.917	0.16205	13.9167	-0.12835	13.917	0.384	13.9168	0.08905
13.9253	0.17045	13.925	-0.1226	13.9253	0.3927	13.9252	0.096
13.9337	0.18025	13.9333	-0.11725	13.9337	0.40135	13.9335	0.1062
13.942	0.1878	13.9417	-0.1144	13.942	0.40715	13.9418	0.1115
13.9503	0.1963	13.95	-0.10745	13.9503	0.4151	13.9502	0.12105
13.9587	0.20345	13.9583	-0.1012	13.9587	0.4229	13.9585	0.1303
13.967	0.2129	13.9667	-0.09445	13.967	0.4328	13.9668	0.13965
13.9753	0.22165	13.975	-0.0868	13.9753	0.44035	13.9752	0.1479
13.9837	0.23155	13.9833	-0.07605	13.9837	0.4524	13.9835	0.16025
13.992	0.24055	13.9917	-0.06735	13.992	0.4629	13.9918	0.16895
14.0003	0.2481	14	-0.059	14.0003	0.47035	14.0002	0.1762
14.0087	0.25725	14.0083	-0.04945	14.0087	0.479	14.0085	0.1872
14.017	0.2658	14.0167	-0.03785	14.017	0.48895	14.0168	0.19715
14.0253	0.273	14.025	-0.0288	14.0253	0.49885	14.0252	0.20515
14.0337	0.28285	14.0333	-0.01895	14.0337	0.50665	14.0335	0.2166
14.042	0.29065	14.0417	-0.00635	14.042	0.5165	14.0418	0.226
14.0503	0.29835	14.05	0.00415	14.0503	0.5262	14.0502	0.2346
14.0587	0.30305	14.0583	0.0108	14.0587	0.5321	14.0585	0.24075
14.067	0.30945	14.0667	0.01785	14.067	0.5411	14.0668	0.25
14.0753	0.3159	14.075	0.0305	14.0753	0.55085	14.0752	0.25925
14.0837	0.32055	14.0833	0.0374	14.0837	0.5578	14.0835	0.26565
14.092	0.32835	14.0917	0.0478	14.092	0.5684	14.0918	0.27535
14.1003	0.33415	14.1	0.0576	14.1003	0.5758	14.1002	0.28345
14.1087	0.33885	14.1083	0.06715	14.1087	0.58395	14.1085	0.29165
14.117	0.34345	14.1167	0.07365	14.117	0.5901	14.1168	0.2995
14.1253	0.35005	14.125	0.0802	14.1253	0.5978	14.1252	0.30585
14.1337	0.3538	14.1333	0.08755	14.1337	0.6007	14.1335	0.31235
14.142	0.35655	14.1417	0.09315	14.142	0.60655	14.1418	0.31655
14.1503	0.35925	14.15	0.09815	14.1503	0.6095	14.1502	0.3224
14.1587	0.36125	14.1583	0.1023	14.1587	0.6152	14.1585	0.32595
14.167	0.36435	14.1667	0.10805	14.167	0.61845	14.1668	0.3287
14.1753	0.3686	14.175	0.1133	14.1753	0.62405	14.1752	0.33395
14.1837	0.37375	14.1833	0.1159	14.1837	0.6276	14.1835	0.33755
14.192	0.3729	14.1917	0.11685	14.192	0.6276	14.1918	0.33695
14.2003	0.37685	14.2	0.1214	14.2003	0.6305	14.2002	0.34115
14.2087	0.3791	14.2083	0.1263	14.2087	0.63415	14.2085	0.34305
14.217	0.38165	14.2167	0.1275	14.217	0.6354	14.2168	0.34665
14.2253	0.38185	14.225	0.13095	14.2253	0.63715	14.2252	0.3481
14.2337	0.3861	14.2333	0.135	14.2337	0.64065	14.2335	0.35095
14.242	0.3902	14.2417	0.1359	14.242	0.64485	14.2418	0.3518
14.2503	0.38965	14.25	0.1355	14.2503	0.6442	14.2502	0.3504
14.2587	0.39105	14.2583	0.1372	14.2587	0.6475	14.2585	0.3519
14.267	0.39395	14.2667	0.14095	14.267	0.65095	14.2668	0.35535
14.2753	0.3943	14.275	0.14215	14.2753	0.6525	14.2752	0.3572
14.2837	0.39655	14.2833	0.14485	14.2837	0.6542	14.2835	0.3581
14.292	0.39875	14.2917	0.14325	14.292	0.6567	14.2918	0.3613
14.3003	0.3991	14.3	0.14425	14.3003	0.66105	14.3002	0.3636
14.3087	0.40065	14.3083	0.1422	14.3087	0.66145	14.3085	0.36535
14.317	0.39785	14.3167	0.14105	14.317	0.6601	14.3168	0.3648
14.3253	0.39765	14.325	0.1389	14.3253	0.65995	14.3252	0.3655
14.3337	0.39445	14.3333	0.13595	14.3337	0.65895	14.3335	0.3649
14.342	0.39325	14.3417	0.13435	14.342	0.65955	14.3418	0.36335
14.3503	0.39005	14.35	0.1306	14.3503	0.65825	14.3502	0.3626
14.3587	0.38685	14.3583	0.1252	14.3587	0.65705	14.3585	0.36195
14.367	0.38055	14.3667	0.11855	14.367	0.65525	14.3668	0.35805
14.3753	0.37425	14.375	0.11155	14.3753	0.64975	14.3752	0.3561
14.3837	0.3705	14.3833	0.1045	14.3837	0.64625	14.3835	0.35315
14.392	0.35815	14.3917	0.09255	14.392	0.6374	14.3918	0.3453
14.4003	0.35085	14.4	0.08325	14.4003	0.6327	14.4002	0.3412
14.4087	0.3431	14.4083	0.07345	14.4087	0.6254	14.4085	0.33425
14.417	0.3312	14.4167	0.0609	14.417	0.61525	14.4168	0.3256
14.4253	0.321	14.425	0.048	14.4253	0.60655	14.4252	0.31745
14.4337	0.3094	14.4333	0.0324	14.4337	0.5943	14.4335	0.30555
14.442	0.29635	14.4417	0.01775	14.442	0.5815	14.4418	0.2943
14.4503	0.2843	14.45	0.00345	14.4503	0.5704	14.4502	0.2833
14.4587	0.27025	14.4583	-0.01265	14.4587	0.5536	14.4585	0.2678
14.467	0.25785	14.4667	-0.02975	14.467	0.53725	14.4668	0.25405
14.4753	0.2486	14.475	-0.04225	14.4753	0.5243	14.4752	0.2413
14.4837	0.23665	14.4833	-0.05705	14.4837	0.508	14.4835	0.22365
14.492	0.2262	14.4917	-0.07215	14.492	0.4939	14.4918	0.20875
14.5003	0.21635	14.5	-0.0879	14.5003	0.47805	14.5002	0.19215
14.5087	0.2074	14.5083	-0.10205	14.5087	0.46305	14.5085	0.1783
14.517	0.2002	14.5167	-0.11455	14.517	0.44705	14.5168	0.1609
14.5253	0.1891	14.525	-0.12725	14.5253	0.43245	14.5252	0.1463
14.5337	0.17815	14.5333	-0.13815	14.5337	0.41655	14.5335	0.13085
14.542	0.17365	14.5417	-0.1456	14.542	0.40565	14.5418	0.1205
14.5503	0.1671	14.55	-0.1553	14.5503	0.39395	14.5502	0.10495
14.5587	0.1617	14.5583	-0.1622	14.5587	0.3826	14.5585	0.09095
14.567	0.1577	14.5667	-0.1699	14.567	0.37125	14.5668	0.081
14.5753	0.15135	14.575	-0.17745	14.5753	0.3601	14.5752	0.06975
14.5837	0.14615	14.5833	-0.1821	14.5837	0.3518	14.5835	0.06185
14.592	0.1412	14.5917	-0.18835	14.592	0.34405	14.5918	0.0533
14.6003	0.1398	14.6	-0.1929	14.6003	0.3368	14.6002	0.0467
14.6087	0.1409	14.6083	-0.1938	14.6087	0.3325	14.6085	0.0399
14.617	0.14035	14.6167	-0.1985	14.617	0.32715	14.6168	0.0335
14.6253	0.14125	14.625	-0.20315	14.6253	0.3218	14.6252	0.02735
14.6337	0.14425	14.6333	-0.20425	14.6337	0.31915	14.6335	0.02385
14.642	0.14695	14.6417	-0.207	14.642	0.31395	14.6418	0.019
14.6503	0.15265	14.65	-0.20995	14.6503	0.30985	14.6502	0.0151
14.6587	0.1607	14.6583	-0.20955	14.6587	0.3084	14.6585	0.0121
14.667	0.17055	14.6667	-0.2117	14.667	0.307	14.6668	0.0086
14.6753	0.18165	14.675	-0.2138	14.6753	0.2926	14.6752	0.00935
14.6837	0.1929	14.6833	-0.2173	14.6837	0.20235	14.6835	0.00455
14.692	0.20655	14.6917	-0.21775	14.692	0.37735	14.6918	0.00215
14.7003	0.22045	14.7	-0.21845	14.7003	0.29295	14.7002	0.00275
14.7087	0.2339	14.7083	-0.2216	14.7087	0.26755	14.7085	-0.0004
14.717	0.24805	14.7167	-0.221	14.717	0.2875	14.7168	-0.00135
14.7253	0.26025	14.725	-0.22435	14.7253	0.29615	14.7252	-0.00275
14.7337	0.2715	14.7333	-0.22515	14.7337	0.2966	14.7335	-0.00485
14.742	0.2848	14.7417	-0.2236	14.742	0.29965	14.7418	-0.00745
14.7503	0.295	14.75	-0.2237	14.7503	0.30255	14.7502	-0.00725
14.7587	0.3056	14.7583	-0.2243	14.7587	0.30435	14.7585	-0.0065
14.767	0.31125	14.7667	-0.22585	14.767	0.305	14.7668	-0.00905
14.7753	0.3139	14.775	-0.2303	14.7753	0.3054	14.7752	-0.01275
14.7837	0.3215	14.7833	-0.2273	14.7837	0.3101	14.7835	-0.01115
14.792	0.3258	14.7917	-0.22805	14.792	0.31205	14.7918	-0.01185
14.8003	0.32935	14.8	-0.2286	14.8003	0.3166	14.8002	-0.0126
14.8087	0.3289	14.8083	-0.23195	14.8087	0.3171	14.8085	-0.01535
14.817	0.3286	14.8167	-0.2308	14.817	0.31995	14.8168	-0.01615
14.8253	0.3296	14.825	-0.2306	14.8253	0.3243	14.8252	-0.01595
14.8337	0.3273	14.8333	-0.2336	14.8337	0.3095	14.8335	-0.0173
14.842	0.32685	14.8417	-0.2323	14.842	0.2836	14.8418	-0.01745
14.8503	0.32755	14.85	-0.23245	14.8503	0.51115	14.8502	-0.0171
14.8587	0.32875	14.8583	-0.23475	14.8587	0.3166	14.8585	-0.0176
14.867	0.3294	14.8667	-0.23515	14.867	0.3196	14.8668	-0.0175
14.8753	0.3297	14.875	-0.2355	14.8753	0.33995	14.8752	-0.0185
14.8837	0.33115	14.8833	-0.23725	14.8837	0.34765	14.8835	-0.02065
14.892	0.33175	14.8917	-0.2381	14.892	0.3551	14.8918	-0.01985
14.9003	0.33425	14.9	-0.24185	14.9003	0.3603	14.9002	-0.02115
14.9087	0.33985	14.9083	-0.2391	14.9087	0.37005	14.9085	-0.0195
14.917	0.345	14.9167	-0.2383	14.917	0.38125	14.9168	-0.0181
14.9253	0.34965	14.925	-0.23875	14.9253	0.39335	14.9252	-0.0211
14.9337	0.3557	14.9333	-0.2409	14.9337	0.4041	14.9335	-0.0225
14.942	0.36345	14.9417	-0.2425	14.942	0.4184	14.9418	-0.0231
14.9503	0.3736	14.95	-0.2433	14.9503	0.43305	14.9502	-0.02235
14.9587	0.3816	14.9583	-0.24305	14.9587	0.45015	14.9585	-0.0242
14.967	0.39465	14.9667	-0.24425	14.967	0.47185	14.9668	-0.02335
14.9753	0.40835	14.975	-0.24505	14.9753	0.49765	14.9752	-0.02595
14.9837	0.4248	14.9833	-0.24185	14.9837	0.53085	14.9835	-0.023
14.992	0.4389	14.9917	-0.24635	14.992	0.5673	14.9918	-0.02615
15.0003	0.4574	15	-0.24755	15.0003	0.6135	15.0002	-0.0263
15.0087	0.4742	15.0083	-0.24765	15.0087	0.67065	15.0085	-0.0276
15.017	0.49195	15.0167	-0.2497	15.017	0.743	15.0168	-0.03005
15.0253	0.509	15.025	-0.24865	15.0253	0.827	15.0252	-0.02865
15.0337	0.5262	15.0333	-0.24915	15.0337	0.92635	15.0335	-0.02895
15.042	0.544	15.0417	-0.24835	15.042	1.03885	15.0418	-0.0254
15.0503	0.55595	15.05	-0.249	15.0503	1.1541	15.0502	-0.0278
15.0587	0.5696	15.0583	-0.2507	15.0587	1.27295	15.0585	-0.02625
15.067	0.5771	15.0667	-0.25115	15.067	1.38975	15.0668	-0.0249
15.0753	0.58225	15.075	-0.25245	15.0753	1.4992	15.0752	-0.02605
15.0837	0.58645	15.0833	-0.25185	15.0837	1.5991	15.0835	-0.02515
15.092	0.5852	15.0917	-0.25015	15.092	1.686	15.0918	-0.02545
15.1003	0.57955	15.1	-0.25265	15.1003	1.75985	15.1002	-0.02495
15.1087	0.571	15.1083	-0.25285	15.1087	1.81595	15.1085	-0.0251
15.117	0.5579	15.1167	-0.256	15.117	1.8592	15.1168	-0.02905
15.1253	0.5429	15.125	-0.2566	15.1253	1.8854	15.1252	-0.02945
15.1337	0.52575	15.1333	-0.25615	15.1337	1.9044	15.1335	-0.0286
15.142	0.50345	15.1417	-0.2577	15.142	1.9101	15.1418	-0.0281
15.1503	0.4833	15.15	-0.257	15.1503	1.90875	15.1502	-0.02765
15.1587	0.4593	15.1583	-0.25935	15.1587	1.89965	15.1585	-0.0293
15.167	0.43335	15.1667	-0.2576	15.167	1.8865	15.1668	-0.0285
15.1753	0.40765	15.175	-0.25895	15.1753	1.8652	15.1752	-0.03065
15.1837	0.37915	15.1833	-0.26095	15.1837	1.84195	15.1835	-0.0322
15.192	0.35205	15.1917	-0.2608	15.192	1.8155	15.1918	-0.0331
15.2003	0.32455	15.2	-0.26095	15.2003	1.78995	15.2002	-0.033
15.2087	0.2974	15.2083	-0.26185	15.2087	1.76065	15.2085	-0.03245
15.217	0.2714	15.2167	-0.2628	15.217	1.73235	15.2168	-0.03125
15.2253	0.24775	15.225	-0.2609	15.2253	1.70505	15.2252	-0.0321
15.2337	0.2231	15.2333	-0.26355	15.2337	1.6753	15.2335	-0.03125
15.242	0.2	15.2417	-0.26545	15.242	1.6452	15.2418	-0.0342
15.2503	0.1788	15.25	-0.26475	15.2503	1.6185	15.2502	-0.0323
15.2587	0.1593	15.2583	-0.2661	15.2587	1.59155	15.2585	-0.03
15.267	0.1388	15.2667	-0.26425	15.267	1.5644	15.2668	-0.03125
15.2753	0.1208	15.275	-0.2658	15.2753	1.5402	15.2752	-0.0325
15.2837	0.1059	15.2833	-0.2665	15.2837	1.5156	15.2835	-0.0325
15.292	0.0892	15.2917	-0.26755	15.292	1.48895	15.2918	-0.03345
15.3003	0.07485	15.3	-0.27085	15.3003	1.46465	15.3002	-0.0353
15.3087	0.0623	15.3083	-0.27075	15.3087	1.443	15.3085	-0.0374
15.317	0.05155	15.3167	-0.27065	15.317	1.4194	15.3168	-0.0363
15.3253	0.0409	15.325	-0.2712	15.3253	1.3981	15.3252	-0.03795
15.3337	0.0292	15.3333	-0.2718	15.3337	1.3753	15.3335	-0.038
15.342	0.0219	15.3417	-0.2722	15.342	1.3563	15.3418	-0.04025
15.3503	0.0144	15.35	-0.27145	15.3503	1.3388	15.3502	-0.0394
15.3587	0.00875	15.3583	-0.26955	15.3587	1.3208	15.3585	-0.03795
15.367	0.00045	15.3667	-0.272	15.367	1.3024	15.3668	-0.04025
15.3753	-0.00165	15.375	-0.2722	15.3753	1.2852	15.3752	-0.04085
15.3837	-0.008	15.3833	-0.273	15.3837	1.26775	15.3835	-0.04245
15.392	-0.01125	15.3917	-0.2724	15.392	1.25285	15.3918	-0.0388
15.4003	-0.01595	15.4	-0.2739	15.4003	1.2354	15.4002	-0.0415
15.4087	-0.0185	15.4083	-0.27195	15.4087	1.2215	15.4085	-0.0408
15.417	-0.0243	15.4167	-0.27405	15.417	1.205	15.4168	-0.04315
15.4253	-0.0242	15.425	-0.275	15.4253	1.19105	15.4252	-0.0418
15.4337	-0.02505	15.4333	-0.2705	15.4337	1.17825	15.4335	-0.0405
15.442	-0.0272	15.4417	-0.27225	15.442	1.1628	15.4418	-0.04135
15.4503	-0.02925	15.45	-0.27225	15.4503	1.14615	15.4502	-0.04045
15.4587	-0.0305	15.4583	-0.27465	15.4587	1.13135	15.4585	-0.0413
15.467	-0.0346	15.4667	-0.2744	15.467	1.1174	15.4668	-0.0411
15.4753	-0.035	15.475	-0.2753	15.4753	1.1032	15.4752	-0.04275
15.4837	-0.036	15.4833	-0.27565	15.4837	1.08855	15.4835	-0.0408
15.492	-0.03745	15.4917	-0.2762	15.492	1.0749	15.4918	-0.04305
15.5003	-0.03935	15.5	-0.2742	15.5003	1.06	15.5002	-0.0445
15.5087	-0.0418	15.5083	-0.27585	15.5087	1.0431	15.5085	-0.04535
15.517	-0.04165	15.5167	-0.27465	15.517	1.0301	15.5168	-0.045
15.5253	-0.0448	15.525	-0.2785	15.5253	1.0146	15.5252	-0.04555
15.5337	-0.0481	15.5333	-0.27775	15.5337	0.9999	15.5335	-0.04575
15.542	-0.04405	15.5417	-0.2731	15.542	0.98935	15.5418	-0.04305
15.5503	-0.0479	15.55	-0.27855	15.5503	0.97225	15.5502	-0.0452
15.5587	-0.0465	15.5583	-0.27795	15.5587	0.96085	15.5585	-0.04575
15.567	-0.0499	15.5667	-0.2788	15.567	0.9464	15.5668	-0.0472
15.5753	-0.0527	15.575	-0.27975	15.5753	0.93165	15.5752	-0.0486
15.5837	-0.05435	15.5833	-0.2813	15.5837	0.9177	15.5835	-0.0493
15.592	-0.0543	15.5917	-0.28005	15.592	0.90565	15.5918	-0.0492
15.6003	-0.0556	15.6	-0.2778	15.6003	0.8918	15.6002	-0.04745
15.6087	-0.0565	15.6083	-0.2793	15.6087	0.8815	15.6085	-0.04685
15.617	-0.05925	15.6167	-0.28075	15.617	0.8659	15.6168	-0.04885
15.6253	-0.0614	15.625	-0.2848	15.6253	0.8535	15.6252	-0.0489
15.6337	-0.0609	15.6333	-0.28485	15.6337	0.83705	15.6335	-0.04915
15.642	-0.0631	15.6417	-0.2877	15.642	0.8232	15.6418	-0.05095
15.6503	-0.0647	15.65	-0.28835	15.6503	0.8084	15.6502	-0.05305
15.6587	-0.06365	15.6583	-0.289	15.6587	0.79775	15.6585	-0.0504
15.667	-0.06465	15.6667	-0.29015	15.667	0.7837	15.6668	-0.0515
15.6753	-0.06705	15.675	-0.2916	15.6753	0.77095	15.6752	-0.0534
15.6837	-0.0682	15.6833	-0.294	15.6837	0.75655	15.6835	-0.05315
15.692	-0.06685	15.6917	-0.2945	15.692	0.74535	15.6918	-0.05305
15.7003	-0.0705	15.7	-0.29525	15.7003	0.72835	15.7002	-0.05495
15.7087	-0.07295	15.7083	-0.29815	15.7087	0.7158	15.7085	-0.05585
15.717	-0.07315	15.7167	-0.29875	15.717	0.70235	15.7168	-0.05695
15.7253	-0.0743	15.725	-0.3007	15.7253	0.6896	15.7252	-0.05655
15.7337	-0.07325	15.7333	-0.30035	15.7337	0.68055	15.7335	-0.05625
15.742	-0.07375	15.7417	-0.30255	15.742	0.6677	15.7418	-0.0604
15.7503	-0.0753	15.75	-0.3032	15.7503	0.65565	15.7502	-0.06085
15.7587	-0.07575	15.7583	-0.30385	15.7587	0.64175	15.7585	-0.06105
15.767	-0.07825	15.7667	-0.3063	15.767	0.631	15.7668	-0.06205
15.7753	-0.07925	15.775	-0.3092	15.7753	0.61785	15.7752	-0.06455
15.7837	-0.07915	15.7833	-0.30695	15.7837	0.6096	15.7835	-0.06205
15.792	-0.0787	15.7917	-0.30585	15.792	0.6006	15.7918	-0.06105
15.8003	-0.08015	15.8	-0.30905	15.8003	0.5892	15.8002	-0.0641
15.8087	-0.07965	15.8083	-0.31115	15.8087	0.5802	15.8085	-0.06645
15.817	-0.07905	15.8167	-0.3096	15.817	0.5696	15.8168	-0.06415
15.8253	-0.07795	15.825	-0.3112	15.8253	0.56055	15.8252	-0.06325
15.8337	-0.0796	15.8333	-0.31195	15.8337	0.54925	15.8335	-0.06515
15.842	-0.07965	15.8417	-0.31335	15.842	0.5395	15.8418	-0.0667
15.8503	-0.0796	15.85	-0.31305	15.8503	0.53095	15.8502	-0.0664
15.8587	-0.0791	15.8583	-0.31335	15.8587	0.5223	15.8585	-0.0666
15.867	-0.0786	15.8667	-0.315	15.867	0.51315	15.8668	-0.0684
15.8753	-0.0797	15.875	-0.3169	15.8753	0.50225	15.8752	-0.07075
15.8837	-0.0778	15.8833	-0.3163	15.8837	0.4956	15.8835	-0.0678
15.892	-0.07925	15.8917	-0.31825	15.892	0.4856	15.8918	-0.0711
15.9003	-0.07855	15.9	-0.31725	15.9003	0.47745	15.9002	-0.06995
15.9087	-0.0787	15.9083	-0.31825	15.9087	0.46825	15.9085	-0.07085
15.917	-0.07755	15.9167	-0.318	15.917	0.46065	15.9168	-0.07065
15.9253	-0.07515	15.925	-0.3174	15.9253	0.45615	15.9252	-0.06975
15.9337	-0.076	15.9333	-0.3208	15.9337	0.44725	15.9335	-0.07155
15.942	-0.0736	15.9417	-0.3211	15.942	0.4403	15.9418	-0.07225
15.9503	-0.0732	15.95	-0.31935	15.9503	0.4357	15.9502	-0.07225
15.9587	-0.07495	15.9583	-0.32265	15.9587	0.42585	15.9585	-0.07345
15.967	-0.07085	15.9667	-0.32195	15.967	0.42015	15.9668	-0.0712
15.9753	-0.06785	15.975	-0.32215	15.9753	0.4151	15.9752	-0.07105
15.9837	-0.06495	15.9833	-0.32185	15.9837	0.41055	15.9835	-0.0702
15.992	-0.06035	15.9917	-0.3222	15.992	0.40545	15.9918	-0.07
16.0003	-0.0541	16	-0.32285	16.0003	0.4017	16.0002	-0.0682
16.0087	-0.04925	16.0083	-0.3236	16.0087	0.39325	16.0085	-0.06905
16.017	-0.0419	16.0167	-0.32495	16.017	0.38585	16.0168	-0.06845
16.0253	-0.0298	16.025	-0.32435	16.0253	0.38395	16.0252	-0.06585
16.0337	-0.02055	16.0333	-0.3249	16.0337	0.3785	16.0335	-0.0662
16.042	-0.0089	16.0417	-0.3244	16.042	0.37235	16.0418	-0.06565
16.0503	0.00535	16.05	-0.32355	16.0503	0.3683	16.0502	-0.06725
16.0587	0.0221	16.0583	-0.32415	16.0587	0.36495	16.0585	-0.06595
16.067	0.0391	16.0667	-0.32395	16.067	0.3598	16.0668	-0.0662
16.0753	0.0569	16.075	-0.3243	16.0753	0.35615	16.0752	-0.0666
16.0837	0.07295	16.0833	-0.3252	16.0837	0.34985	16.0835	-0.0669
16.092	0.09295	16.0917	-0.32725	16.092	0.34605	16.0918	-0.0688
16.1003	0.1135	16.1	-0.32575	16.1003	0.3471	16.1002	-0.06555
16.1087	0.1337	16.1083	-0.3255	16.1087	0.3446	16.1085	-0.0642
16.117	0.15165	16.1167	-0.32465	16.117	0.34275	16.1168	-0.06395
16.1253	0.1663	16.125	-0.3279	16.1253	0.3393	16.1252	-0.06485
16.1337	0.17735	16.1333	-0.3274	16.1337	0.33725	16.1335	-0.06515
16.142	0.1882	16.1417	-0.32865	16.142	0.33645	16.1418	-0.0657
16.1503	0.19805	16.15	-0.3288	16.1503	0.3357	16.1502	-0.06645
16.1587	0.20595	16.1583	-0.32825	16.1587	0.33415	16.1585	-0.06735
16.167	0.21225	16.1667	-0.3299	16.167	0.33385	16.1668	-0.0664
16.1753	0.21565	16.175	-0.3311	16.1753	0.33445	16.1752	-0.0661
16.1837	0.22025	16.1833	-0.32985	16.1837	0.33775	16.1835	-0.0645
16.192	0.2195	16.1917	-0.3317	16.192	0.3364	16.1918	-0.0646
16.2003	0.22065	16.2	-0.3306	16.2003	0.3373	16.2002	-0.065
16.2087	0.2205	16.2083	-0.33165	16.2087	0.3385	16.2085	-0.06385
16.217	0.21875	16.2167	-0.33245	16.217	0.34015	16.2168	-0.0637
16.2253	0.21635	16.225	-0.3332	16.2253	0.3426	16.2252	-0.0665
16.2337	0.2139	16.2333	-0.3333	16.2337	0.34595	16.2335	-0.06455
16.242	0.20975	16.2417	-0.33465	16.242	0.3481	16.2418	-0.0678
16.2503	0.20675	16.25	-0.33315	16.2503	0.34995	16.2502	-0.0666
16.2587	0.20355	16.2583	-0.3342	16.2587	0.35095	16.2585	-0.0659
16.267	0.1988	16.2667	-0.33395	16.267	0.35415	16.2668	-0.0664
16.2753	0.19375	16.275	-0.3355	16.2753	0.35465	16.2752	-0.0671
16.2837	0.1916	16.2833	-0.33455	16.2837	0.35835	16.2835	-0.0667
16.292	0.1869	16.2917	-0.33505	16.292	0.3617	16.2918	-0.0659
16.3003	0.18135	16.3	-0.33555	16.3003	0.3644	16.3002	-0.06815
16.3087	0.17665	16.3083	-0.3368	16.3087	0.36815	16.3085	-0.06765
16.317	0.17045	16.3167	-0.33685	16.317	0.3697	16.3168	-0.06845
16.3253	0.1662	16.325	-0.336	16.3253	0.37385	16.3252	-0.0673
16.3337	0.16085	16.3333	-0.33645	16.3337	0.3762	16.3335	-0.06785
16.342	0.15565	16.3417	-0.33455	16.342	0.37885	16.3418	-0.06805
16.3503	0.14995	16.35	-0.3353	16.3503	0.3815	16.3502	-0.06675
16.3587	0.1463	16.3583	-0.33575	16.3587	0.3848	16.3585	-0.06605
16.367	0.1417	16.3667	-0.3366	16.367	0.38465	16.3668	-0.06495
16.3753	0.1375	16.375	-0.3362	16.3753	0.386	16.3752	-0.06425
16.3837	0.1334	16.3833	-0.3377	16.3837	0.38565	16.3835	-0.06425
16.392	0.1312	16.3917	-0.33605	16.392	0.38635	16.3918	-0.06245
16.4003	0.1283	16.4	-0.3364	16.4003	0.3859	16.4002	-0.06345
16.4087	0.12825	16.4083	-0.33445	16.4087	0.38655	16.4085	-0.0625
16.417	0.12645	16.4167	-0.33655	16.417	0.3854	16.4168	-0.06235
16.4253	0.12755	16.425	-0.33495	16.4253	0.38485	16.4252	-0.0624
16.4337	0.1289	16.4333	-0.33435	16.4337	0.3833	16.4335	-0.06265
16.442	0.13135	16.4417	-0.3356	16.442	0.38065	16.4418	-0.06305
16.4503	0.13415	16.45	-0.3318	16.4503	0.38145	16.4502	-0.0611
16.4587	0.14085	16.4583	-0.3305	16.4587	0.37935	16.4585	-0.06035
16.467	0.1497	16.4667	-0.3261	16.467	0.3821	16.4668	-0.0571
16.4753	0.16225	16.475	-0.32275	16.4753	0.3838	16.4752	-0.056
16.4837	0.17625	16.4833	-0.31845	16.4837	0.3885	16.4835	-0.0521
16.492	0.19355	16.4917	-0.3127	16.492	0.3936	16.4918	-0.04835
16.5003	0.21325	16.5	-0.30405	16.5003	0.4007	16.5002	-0.04245
16.5087	0.23935	16.5083	-0.29345	16.5087	0.4097	16.5085	-0.0361
16.517	0.26935	16.5167	-0.2835	16.517	0.4222	16.5168	-0.02765
16.5253	0.30685	16.525	-0.26625	16.5253	0.43835	16.5252	-0.01685
16.5337	0.3506	16.5333	-0.2463	16.5337	0.4595	16.5335	-0.00105
16.542	0.4049	16.5417	-0.21975	16.542	0.48735	16.5418	0.01925
16.5503	0.46225	16.55	-0.19185	16.5503	0.51935	16.5502	0.0412
16.5587	0.52835	16.5583	-0.15745	16.5587	0.5569	16.5585	0.06955
16.567	0.6023	16.5667	-0.11595	16.567	0.603	16.5668	0.1007
16.5753	0.68325	16.575	-0.0701	16.5753	0.6517	16.5752	0.13975
16.5837	0.7722	16.5833	-0.0149	16.5837	0.71065	16.5835	0.1833
16.592	0.8684	16.5917	0.0459	16.592	0.77725	16.5918	0.2355
16.6003	0.9711	16.6	0.1174	16.6003	0.851	16.6002	0.29515
16.6087	1.08025	16.6083	0.1929	16.6087	0.9331	16.6085	0.36295
16.617	1.1925	16.6167	0.2751	16.617	1.0207	16.6168	0.43615
16.6253	1.3057	16.625	0.3619	16.6253	1.11145	16.6252	0.5172
16.6337	1.42225	16.6333	0.45445	16.6337	1.21385	16.6335	0.6039
[truncated: 4,604 more rows]
