# Supplementary material for: A moonlighting function of a chitin polysaccharide monooxygenase, CWR-1, in Neurospora crassa allorecognition
Source: eLife. 2022 Aug 30;11:e80459. doi: 10.7554/eLife.80459 (PMC9550227; doi:10.7554/eLife.80459)
Supplement: Figure 1—source data 2. — The amount of bound copper that was calculated for each polysaccharide monooxygenase (PMO) construct. The amount of copper was determined using ICP-MS and then divided by the protein concentration to generate a ratio. The protein concentration was determined using the absorbance at 280 nm with a NanoDrop UV-Vis with extinction coefficients predicted by Benchling (all Cys oxidized). The results from the technical triplicates are listed. [file elife-80459-fig1-data2.xlsx]

## Sheet: Sheet1
	Copper Equivalents (Cu µM/Protein µM)
	Haplogroup
	HG1	0.65	0.71	0.72
