# Supplementary material for: A moonlighting function of a chitin polysaccharide monooxygenase, CWR-1, in Neurospora crassa allorecognition
Source: eLife. 2022 Aug 30;11:e80459. doi: 10.7554/eLife.80459 (PMC9550227; doi:10.7554/eLife.80459)
Supplement: Figure 1—source data 3. — The slopes from monitoring polysaccharide monooxygenase (PMO)-catalyzed oxygen reduction using an HRP-coupled assay. A PMO sample (2 µM) was incubated at room temperature with 100 µM Amplex red, 1.3 µM HRP (Sigma), 2 mM ascorbate in 50 mM MOPS pH 7.0. The change in absorbance at 540 nm vs. time (min) is listed for each biological replicate in this table. [file elife-80459-fig1-data3.xlsx]

## Sheet: Sheet1
Oxygen Reduction Assay (A540nm*min-1)
Haplogroup
HG1	0.059	0.057	0.065
