# Supplementary material for: A moonlighting function of a chitin polysaccharide monooxygenase, CWR-1, in Neurospora crassa allorecognition
Source: eLife. 2022 Aug 30;11:e80459. doi: 10.7554/eLife.80459 (PMC9550227; doi:10.7554/eLife.80459)
Supplement: Figure 1—source data 4. — Fusion test of the truncated versions of CWR-1 paired with cwr-2HG3; ΔΔΔ. [file elife-80459-fig1-data4.xlsx]

## Sheet: Figure 1C-source data
Figure 1C-source data.
Fusion test of the truncated versions of CWR-1 paired with cwr-2HG3; DDD.
One-way ANOVA summary: F= 164.6, P value 0.0000001579
Tukey’s multiple comparison test	95.00% CI	Summary	P value
DDD vs cwr-1HG1; DDD	66.66 to 92.01	****	1.587e-07
DDD vs cwr-1DG/SHG1; DDD	52.99 to 78.34	****	8.425e-07
DDD vs cwr-1DG/SDX278HG1; DDD	54.66 to 80.01	****	6.853e-07
cwr-1HG1; DDD vs cwr-1DG/SHG1; DDD	-26.34 to -0.9914	*	0.0352091
cwr-1HG1; DDD vs cwr-1DG/SDX278HG1; DDD	-24.68 to 0.6753	ns	0.0635974
cwr-1DG/SHG1; DDD vs cwr-1DG/SDX278HG1; DDD	-11.01 to 14.34	ns	0.973266
