# Supplementary material for: A moonlighting function of a chitin polysaccharide monooxygenase, CWR-1, in Neurospora crassa allorecognition
Source: eLife. 2022 Aug 30;11:e80459. doi: 10.7554/eLife.80459 (PMC9550227; doi:10.7554/eLife.80459)
Supplement: Figure 3—source data 1. — Fusion test of the different CWR-1 full-length and CWR-1 chimeras paired with cwr-1HG1cwr-2HG1. [file elife-80459-fig3-data1.xlsx]

## Sheet: Figure 3D-source data 
Figure 3D-source data.
Fusion test of the different CWR-1 full length and CWR-1 chimeras paired with cwr-1HG1cwr-2HG1.
One-way ANOVA summary: F= 76.27, P value <0.0000000001
Tukey’s multiple comparison test	95.00% CI	Summary	P value
cwr-1HG1; DDD vs cwr-1HG2; DDD	62.02 to 89.31	****	<0.0000000001
cwr-1HG1; DDD vs cwr-1HG3; DDD	61.69 to 88.98	****	<0.0000000001
cwr-1HG1; DDD vs cwr-1HG4; DDD	58.69 to 85.98	****	<0.0000000001
cwr-1HG1; DDD vs cwr-1HG5; DDD	64.36 to 91.64	****	<0.0000000001
cwr-1HG1; DDD vs cwr-1HG6; DDD	71.36 to 98.64	****	<0.0000000001
cwr-1HG1; DDD vs cwr-1HG2+HG1; DDD	63.69 to 90.98	****	<0.0000000001
cwr-1HG1; DDD vs cwr-1HG3+HG1; DDD	64.02 to 91.31	****	<0.0000000001
cwr-1HG1; DDD vs cwr-1HG4+HG1; DDD	57.02 to 84.31	****	<0.0000000001
cwr-1HG1; DDD vs cwr-1HG5+HG1; DDD	57.36 to 84.64	****	<0.0000000001
cwr-1HG1; DDD vs cwr-1HG6+HG1; DDD	70.02 to 97.31	****	<0.0000000001
cwr-1HG2; DDD vs cwr-1HG3; DDD	-13.98 to 13.31	ns	>0.9999999999
cwr-1HG2; DDD vs cwr-1HG4; DDD	-16.98 to 10.31	ns	0.997744
cwr-1HG2; DDD vs cwr-1HG5; DDD	-11.31 to 15.98	ns	0.999895
cwr-1HG2; DDD vs cwr-1HG6; DDD	-4.310 to 22.98	ns	0.384075
cwr-1HG2; DDD vs cwr-1HG2+HG1; DDD	-11.98 to 15.31	ns	0.999995
cwr-1HG2; DDD vs cwr-1HG3+HG1; DDD	-11.64 to 15.64	ns	0.999974
cwr-1HG2; DDD vs cwr-1HG4+HG1; DDD	-18.64 to 8.643	ns	0.957101
cwr-1HG2; DDD vs cwr-1HG5+HG1; DDD	-18.31 to 8.977	ns	0.972553
cwr-1HG2; DDD vs cwr-1HG6+HG1; DDD	-5.643 to 21.64	ns	0.591294
cwr-1HG3; DDD vs cwr-1HG4; DDD	-16.64 to 10.64	ns	0.999055
cwr-1HG3; DDD vs cwr-1HG5; DDD	-10.98 to 16.31	ns	0.999656
cwr-1HG3; DDD vs cwr-1HG6; DDD	-3.977 to 23.31	ns	0.338482
cwr-1HG3; DDD vs cwr-1HG2+HG1; DDD	-11.64 to 15.64	ns	0.999974
cwr-1HG3; DDD vs cwr-1HG3+HG1; DDD	-11.31 to 15.98	ns	0.999895
cwr-1HG3; DDD vs cwr-1HG4+HG1; DDD	-18.31 to 8.977	ns	0.972553
cwr-1HG3; DDD vs cwr-1HG5+HG1; DDD	-17.98 to 9.310	ns	0.983473
cwr-1HG3; DDD vs cwr-1HG6+HG1; DDD	-5.310 to 21.98	ns	0.537148
cwr-1HG4; DDD vs cwr-1HG5; DDD	-7.977 to 19.31	ns	0.910006
cwr-1HG4; DDD vs cwr-1HG6; DDD	-0.9766 to 26.31	ns	0.084388
cwr-1HG4; DDD vs cwr-1HG2+HG1; DDD	-8.643 to 18.64	ns	0.957101
cwr-1HG4; DDD vs cwr-1HG3+HG1; DDD	-8.310 to 18.98	ns	0.936407
cwr-1HG4; DDD vs cwr-1HG4+HG1; DDD	-15.31 to 11.98	ns	0.999995
cwr-1HG4; DDD vs cwr-1HG5+HG1; DDD	-14.98 to 12.31	ns	0.999999
cwr-1HG4; DDD vs cwr-1HG6+HG1; DDD	-2.310 to 24.98	ns	0.164219
cwr-1HG5; DDD vs cwr-1HG6; DDD	-6.643 to 20.64	ns	0.749304
cwr-1HG5; DDD vs cwr-1HG2+HG1; DDD	-14.31 to 12.98	ns	1
cwr-1HG5; DDD vs cwr-1HG3+HG1; DDD	-13.98 to 13.31	ns	>0.9999999999
cwr-1HG5; DDD vs cwr-1HG4+HG1; DDD	-20.98 to 6.310	ns	0.6985
cwr-1HG5; DDD vs cwr-1HG5+HG1; DDD	-20.64 to 6.643	ns	0.749304
cwr-1HG5; DDD vs cwr-1HG6+HG1; DDD	-7.977 to 19.31	ns	0.910006
cwr-1HG6; DDD vs cwr-1HG2+HG1; DDD	-21.31 to 5.977	ns	0.645447
cwr-1HG6; DDD vs cwr-1HG3+HG1; DDD	-20.98 to 6.310	ns	0.6985
cwr-1HG6; DDD vs cwr-1HG4+HG1; DDD	-27.98 to -0.6901	*	0.0340649
cwr-1HG6; DDD vs cwr-1HG5+HG1; DDD	-27.64 to -0.3567	*	0.0410545
cwr-1HG6; DDD vs cwr-1HG6+HG1; DDD	-14.98 to 12.31	ns	0.999999
cwr-1HG2+HG1; DDD vs cwr-1HG3+HG1; DDD	-13.31 to 13.98	ns	>0.9999999999
cwr-1HG2+HG1; DDD vs cwr-1HG4+HG1; DDD	-20.31 to 6.977	ns	0.796743
cwr-1HG2+HG1; DDD vs cwr-1HG5+HG1; DDD	-19.98 to 7.310	ns	0.839822
cwr-1HG2+HG1; DDD vs cwr-1HG6+HG1; DDD	-7.310 to 19.98	ns	0.839822
cwr-1HG3+HG1; DDD vs cwr-1HG4+HG1; DDD	-20.64 to 6.643	ns	0.749304
cwr-1HG3+HG1; DDD vs cwr-1HG5+HG1; DDD	-20.31 to 6.977	ns	0.796743
cwr-1HG3+HG1; DDD vs cwr-1HG6+HG1; DDD	-7.643 to 19.64	ns	0.877748
cwr-1HG4+HG1; DDD vs cwr-1HG5+HG1; DDD	-13.31 to 13.98	ns	>0.9999999999
cwr-1HG4+HG1; DDD vs cwr-1HG6+HG1; DDD	-0.6433 to 26.64	ns	0.0707891
cwr-1HG5+HG1; DDD vs cwr-1HG6+HG1; DDD	-0.9766 to 26.31	ns	0.084388
