# Supplementary material for: A moonlighting function of a chitin polysaccharide monooxygenase, CWR-1, in Neurospora crassa allorecognition
Source: eLife. 2022 Aug 30;11:e80459. doi: 10.7554/eLife.80459 (PMC9550227; doi:10.7554/eLife.80459)
Supplement: Figure 4—figure supplement 1—source data 1. — Blank subtracted HPAEC-PAD traces. The samples were prepared as described in ‘Materials and methods.’ The time and nC response are listed in the table. [file elife-80459-fig4-figsupp1-data1.xlsx]

## Sheet: Sheet1
Figure 4-figure supplement 1 (reaction before fusion experiment)
HG1+FCSG 2489 CW		FGSC2489 CW+Asc.		HG 4+ JW242 CW		JW242 CW+ Asc.
time	nC	time	nC	time	nC	time	nC
0.000167	0.319601	0	-0.0513	0.000333	-0.4034	0.000333	-0.1463
0.0085	0.277251	0.008333	-0.05755	0.008667	-0.40095	0.008667	-0.153
0.016833	0.271551	0.016667	-0.0366	0.017	-0.4044	0.017	-0.148
0.025167	0.279051	0.025	-0.02595	0.025333	-0.39925	0.025333	-0.136
0.0335	0.282251	0.033333	-0.02155	0.033667	-0.3961	0.033667	-0.13035
0.041833	0.282201	0.041667	-0.02175	0.042	-0.3964	0.042	-0.1263
0.050167	0.284601	0.05	-0.02	0.050333	-0.39555	0.050333	-0.1226
0.0585	0.286101	0.058333	-0.02065	0.058667	-0.3945	0.058667	-0.1199
0.066833	0.285201	0.066667	-0.01925	0.067	-0.39465	0.067	-0.12105
0.075167	0.287751	0.075	-0.0191	0.075333	-0.39565	0.075333	-0.1208
0.0835	0.286101	0.083333	-0.01885	0.083667	-0.39695	0.083667	-0.12155
0.091833	0.285351	0.091667	-0.0185	0.092	-0.397	0.092	-0.12255
0.100167	0.286551	0.1	-0.01945	0.100333	-0.3963	0.100333	-0.1225
0.1085	0.286551	0.108333	-0.0185	0.108667	-0.399	0.108667	-0.1221
0.116833	0.288801	0.116667	-0.01825	0.117	-0.3977	0.117	-0.12225
0.125167	0.288401	0.125	-0.023	0.125333	-0.3993	0.125333	-0.123
0.1335	0.288251	0.133333	-0.02145	0.133667	-0.3996	0.133667	-0.12405
0.141833	0.291001	0.141667	-0.0209	0.142	-0.4023	0.142	-0.12555
0.150167	0.290551	0.15	-0.021	0.150333	-0.4022	0.150333	-0.1229
0.1585	0.292051	0.158333	-0.02035	0.158667	-0.39765	0.158667	-0.12195
0.166833	0.293351	0.166667	-0.0213	0.167	-0.39655	0.167	-0.11935
0.175167	0.295501	0.175	-0.0181	0.175333	-0.39735	0.175333	-0.11625
0.1835	0.29455	0.183333	-0.0199	0.183667	-0.39805	0.183667	-0.11815
0.191833	0.295	0.191667	-0.0196	0.192	-0.39685	0.192	-0.1167
0.200167	0.29675	0.2	-0.01775	0.200333	-0.3981	0.200333	-0.1158
0.2085	0.295	0.208333	-0.0199	0.208667	-0.3985	0.208667	-0.1139
0.216833	0.29855	0.216667	-0.0172	0.217	-0.39755	0.217	-0.11445
0.225167	0.29785	0.225	-0.0166	0.225333	-0.3959	0.225333	-0.11325
0.2335	0.30055	0.233333	-0.01775	0.233667	-0.3978	0.233667	-0.11195
0.241833	0.2993	0.241667	-0.01815	0.242	-0.39735	0.242	-0.11095
0.250167	0.3	0.25	-0.0191	0.250333	-0.39705	0.250333	-0.10745
0.2585	0.30015	0.258333	-0.01805	0.258667	-0.39705	0.258667	-0.1084
0.266833	0.30355	0.266667	-0.019	0.267	-0.3975	0.267	-0.1062
0.275167	0.30335	0.275	-0.01935	0.275333	-0.3984	0.275333	-0.107
0.2835	0.30415	0.283333	-0.02015	0.283667	-0.39745	0.283667	-0.1076
0.291833	0.30315	0.291667	-0.01925	0.292	-0.39655	0.292	-0.1067
0.300167	0.30585	0.3	-0.0181	0.300333	-0.39695	0.300333	-0.1082
0.3085	0.3044	0.308333	-0.01985	0.308667	-0.39575	0.308667	-0.10785
0.316833	0.305	0.316667	-0.01795	0.317	-0.3977	0.317	-0.10815
0.325167	0.3053	0.325	-0.00095	0.325333	-0.39745	0.325333	-0.10655
0.3335	0.30655	0.333333	0.02125	0.333667	-0.39665	0.333667	-0.10565
0.341833	0.3058	0.341667	-0.266	0.342	-0.39765	0.342	-0.10595
0.350167	0.3082	0.35	-0.03675	0.350333	-0.3961	0.350333	-0.1044
0.3585	0.3092	0.358333	0.0023	0.358667	-0.3953	0.358667	-0.1008
0.366833	0.30895	0.366667	-0.00265	0.367	-0.3975	0.367	-0.1022
0.375167	0.30875	0.375	-0.0081	0.375333	-0.3971	0.375333	-0.10145
0.3835	0.3107	0.383333	-0.01165	0.383667	-0.39395	0.383667	-0.09835
0.391833	0.3121	0.391667	-0.0132	0.392	-0.3959	0.392	-0.09965
0.400167	0.3123	0.4	-0.01065	0.400333	-0.39635	0.400333	-0.0978
0.4085	0.31345	0.408333	-0.0133	0.408667	-0.395	0.408667	-0.0976
0.416833	0.3115	0.416667	-0.0128	0.417	-0.3949	0.417	-0.0963
0.425167	0.3141	0.425	-0.0101	0.425333	-0.39605	0.425333	-0.09375
0.4335	0.31315	0.433333	-0.01305	0.433667	-0.39555	0.433667	-0.09295
0.441833	0.31125	0.441667	-0.02675	0.442	-0.3967	0.442	-0.09335
0.450167	0.3127	0.45	-0.0352	0.450333	-0.3983	0.450333	-0.0916
0.4585	0.3157	0.458333	-0.04645	0.458667	-0.39775	0.458667	-0.092
0.466833	0.31605	0.466667	-0.0691	0.467	-0.3964	0.467	-0.0923
0.475167	0.31535	0.475	-0.00565	0.475333	-0.39575	0.475333	-0.09235
0.4835	0.3177	0.483333	-0.01295	0.483667	-0.39475	0.483667	-0.0902
0.491833	0.31845	0.491667	0.04615	0.492	-0.39695	0.492	-0.0923
0.500167	0.31695	0.5	0.003	0.500333	-0.39405	0.500333	-0.09005
0.5085	0.31745	0.508333	-0.0055	0.508667	-0.39425	0.508667	-0.089
0.516833	0.31775	0.516667	-0.0159	0.517	-0.3978	0.517	-0.09255
0.525167	0.3183	0.525	-0.0152	0.525333	-0.39765	0.525333	-0.0919
0.5335	0.3202	0.533333	-0.016	0.533667	-0.398	0.533667	-0.09235
0.541833	0.32065	0.541667	-0.016	0.542	-0.3956	0.542	-0.08935
0.550167	0.322	0.55	-0.0137	0.550333	-0.39715	0.550333	-0.0891
0.5585	0.32175	0.558333	-0.00655	0.558667	-0.39555	0.558667	-0.08945
0.566833	0.3212	0.566667	0.0048	0.567	-0.3957	0.567	-0.08735
0.575167	0.3225	0.575	-0.01185	0.575333	-0.3954	0.575333	-0.08525
0.5835	0.32195	0.583333	-0.00455	0.583667	-0.39525	0.583667	-0.08525
0.591833	0.3238	0.591667	-0.02555	0.592	-0.3955	0.592	-0.0858
0.600167	0.323	0.6	-0.0009	0.600333	-0.39435	0.600333	-0.0841
0.6085	0.3228	0.608333	-0.00655	0.608667	-0.39575	0.608667	-0.082
0.616833	0.3242	0.616667	-0.0109	0.617	-0.39515	0.617	-0.0792
0.625167	0.32375	0.625	-0.01045	0.625333	-0.3949	0.625333	-0.07905
0.6335	0.3255	0.633333	-0.01355	0.633667	-0.39725	0.633667	-0.0805
0.641833	0.32645	0.641667	-0.0142	0.642	-0.3964	0.642	-0.07835
0.650167	0.326	0.65	-0.01395	0.650333	-0.39795	0.650333	-0.07945
0.6585	0.32565	0.658333	-0.0145	0.658667	-0.3971	0.658667	-0.0794
0.666833	0.3257	0.666667	-0.01535	0.667	-0.3959	0.667	-0.07945
0.675167	0.32755	0.675	-0.01475	0.675333	-0.3965	0.675333	-0.07965
0.6835	0.32975	0.683333	-0.0138	0.683667	-0.39595	0.683667	-0.07885
0.691833	0.32685	0.691667	-0.01275	0.692	-0.3974	0.692	-0.0783
0.700167	0.32765	0.7	-0.01535	0.700333	-0.3975	0.700333	-0.07935
0.7085	0.3277	0.708333	-0.01225	0.708667	-0.3973	0.708667	-0.0773
0.716833	0.33	0.716667	0.05985	0.717	-0.3965	0.717	-0.07715
0.725167	0.32915	0.725	-0.0038	0.725333	-0.39685	0.725333	-0.07755
0.7335	0.331	0.733333	0.0275	0.733667	-0.3961	0.733667	-0.0769
0.741833	0.3315	0.741667	-0.05035	0.742	-0.3982	0.742	-0.0768
0.750167	0.33305	0.75	-0.03515	0.750333	-0.39795	0.750333	-0.07625
0.7585	0.33165	0.758333	-0.0052	0.758667	-0.3972	0.758667	-0.0759
0.766833	0.33345	0.766667	0.0642	0.767	-0.39725	0.767	-0.07545
0.775167	0.33295	0.775	-0.02355	0.775333	-0.39875	0.775333	-0.0748
0.7835	0.33405	0.783333	-0.03545	0.783667	-0.3963	0.783667	-0.0749
0.791833	0.33435	0.791667	-0.02815	0.792	-0.39855	0.792	-0.07555
0.800167	0.33475	0.8	-0.0225	0.800333	-0.3971	0.800333	-0.07225
0.8085	0.3358	0.808333	-0.01915	0.808667	-0.39715	0.808667	-0.07205
0.816833	0.3337	0.816667	-0.01575	0.817	-0.3961	0.817	-0.07145
0.825167	0.3356	0.825	-0.0145	0.825333	-0.39665	0.825333	-0.07135
0.8335	0.33645	0.833333	-0.0157	0.833667	-0.39605	0.833667	-0.07
0.841833	0.33625	0.841667	-0.0149	0.842	-0.39655	0.842	-0.0702
0.850167	0.33525	0.85	-0.01305	0.850333	-0.396	0.850333	-0.07115
0.8585	0.33615	0.858333	-0.0136	0.858667	-0.3958	0.858667	-0.0698
0.866833	0.3385	0.866667	-0.01285	0.867	-0.3954	0.867	-0.0707
0.875167	0.337	0.875	-0.0138	0.875333	-0.39645	0.875333	-0.071
0.8835	0.33655	0.883333	-0.01285	0.883667	-0.39535	0.883667	-0.0709
0.891833	0.33755	0.891667	-0.01305	0.892	-0.39495	0.892	-0.0704
0.900167	0.3391	0.9	-0.01085	0.900333	-0.39575	0.900333	-0.0687
0.9085	0.3393	0.908333	-0.0098	0.908667	-0.39535	0.908667	-0.06895
0.916833	0.3397	0.916667	-0.01195	0.917	-0.3946	0.917	-0.0665
0.925167	0.3408	0.925	-0.0149	0.925333	-0.3948	0.925333	-0.0671
0.9335	0.34325	0.933333	-0.0135	0.933667	-0.3961	0.933667	-0.0673
0.941833	0.34085	0.941667	-0.0136	0.942	-0.39565	0.942	-0.06705
0.950167	0.34345	0.95	-0.0142	0.950333	-0.39645	0.950333	-0.06865
0.9585	0.3416	0.958333	-0.0154	0.958667	-0.39525	0.958667	-0.06625
0.966833	0.34195	0.966667	-0.0132	0.967	-0.39575	0.967	-0.06565
0.975167	0.34415	0.975	-0.01375	0.975333	-0.39645	0.975333	-0.06475
0.9835	0.34335	0.983333	-0.0146	0.983667	-0.39725	0.983667	-0.0639
0.991833	0.3433	0.991667	-0.01295	0.992	-0.39715	0.992	-0.0639
1.00017	0.3432	1	-0.01445	1.00033	-0.3972	1.00033	-0.06295
1.0085	0.34565	1.00833	-0.01575	1.00867	-0.3974	1.00867	-0.0603
1.01683	0.34455	1.01667	-0.01665	1.017	-0.39875	1.017	-0.0615
1.02517	0.34655	1.025	-0.01635	1.02533	-0.39805	1.02533	-0.06135
1.0335	0.34425	1.03333	-0.01715	1.03367	-0.3993	1.03367	-0.06305
1.04183	0.3466	1.04167	-0.01575	1.042	-0.39905	1.042	-0.0639
1.05017	0.34775	1.05	-0.01665	1.05033	-0.3976	1.05033	-0.0619
1.0585	0.34665	1.05833	-0.0216	1.05867	-0.39845	1.05867	-0.06385
1.06683	0.34645	1.06667	-0.00165	1.067	-0.39885	1.067	-0.0639
1.07517	0.34775	1.075	-0.03165	1.07533	-0.39775	1.07533	-0.0623
1.0835	0.34835	1.08333	0.0822	1.08367	-0.3983	1.08367	-0.06545
1.09183	0.34595	1.09167	0.027	1.092	-0.39845	1.092	-0.06505
1.10017	0.348	1.1	-0.0023	1.10033	-0.39635	1.10033	-0.06375
1.1085	0.3469	1.10833	-0.0246	1.10867	-0.39755	1.10867	-0.06165
1.11683	0.3477	1.11667	-0.02075	1.117	-0.39735	1.117	-0.0632
1.12517	0.3485	1.125	-0.0164	1.12533	-0.39645	1.12533	-0.0615
1.1335	0.3495	1.13333	-0.01705	1.13367	-0.3955	1.13367	-0.06245
1.14183	0.35005	1.14167	-0.01635	1.142	-0.39755	1.142	-0.06195
1.15017	0.34735	1.15	-0.01635	1.15033	-0.3958	1.15033	-0.05985
1.1585	0.35075	1.15833	-0.01625	1.15867	-0.39705	1.15867	-0.0606
1.16683	0.34925	1.16667	-0.0163	1.167	-0.39675	1.167	-0.0602
1.17517	0.35145	1.175	-0.0171	1.17533	-0.39725	1.17533	-0.05895
1.1835	0.35155	1.18333	-0.0158	1.18367	-0.3966	1.18367	-0.0593
1.19183	0.35275	1.19167	-0.01735	1.192	-0.39635	1.192	-0.0567
1.20017	0.3517	1.2	-0.01685	1.20033	-0.39725	1.20033	-0.05735
1.2085	0.3531	1.20833	-0.0195	1.20867	-0.3959	1.20867	-0.0556
1.21683	0.3516	1.21667	-0.0192	1.217	-0.39825	1.217	-0.0587
1.22517	0.3509	1.225	-0.0172	1.22533	-0.4011	1.22533	-0.0598
1.2335	0.3525	1.23333	-0.0158	1.23367	-0.3997	1.23367	-0.05905
1.24183	0.3538	1.24167	-0.0162	1.242	-0.3995	1.242	-0.05975
1.25017	0.3519	1.25	-0.01885	1.25033	-0.3989	1.25033	-0.06005
1.2585	0.35275	1.25833	-0.0193	1.25867	-0.39925	1.25867	-0.0621
1.26683	0.3531	1.26667	-0.01755	1.267	-0.39885	1.267	-0.0614
1.27517	0.35285	1.275	-0.01795	1.27533	-0.39775	1.27533	-0.0613
1.2835	0.3535	1.28333	-0.01915	1.28367	-0.40005	1.28367	-0.06175
1.29183	0.3544	1.29167	-0.01935	1.292	-0.3967	1.292	-0.06035
1.30017	0.35455	1.3	-0.02	1.30033	-0.3992	1.30033	-0.0602
1.3085	0.35395	1.30833	-0.01845	1.30867	-0.39885	1.30867	-0.06055
1.31683	0.3546	1.31667	-0.0177	1.317	-0.3981	1.317	-0.0586
1.32517	0.3562	1.325	-0.01705	1.32533	-0.39925	1.32533	-0.0604
1.3335	0.3555	1.33333	-0.01785	1.33367	-0.40005	1.33367	-0.05925
1.34183	0.3566	1.34167	-0.02	1.342	-0.39845	1.342	-0.0585
1.35017	0.35355	1.35	-0.0213	1.35033	-0.39825	1.35033	-0.05785
1.3585	0.3551	1.35833	-0.02175	1.35867	-0.39865	1.35867	-0.05575
1.36683	0.3563	1.36667	-0.02245	1.367	-0.39935	1.367	-0.05585
1.37517	0.3571	1.375	-0.02035	1.37533	-0.3995	1.37533	-0.0568
1.3835	0.3557	1.38333	-0.021	1.38367	-0.39825	1.38367	-0.05645
1.39183	0.3565	1.39167	-0.0195	1.392	-0.39885	1.392	-0.05645
1.40017	0.3573	1.4	-0.021	1.40033	-0.3984	1.40033	-0.05715
1.4085	0.3564	1.40833	-0.02085	1.40867	-0.3981	1.40867	-0.05835
1.41683	0.35665	1.41667	-0.0206	1.417	-0.3986	1.417	-0.05785
1.42517	0.35815	1.425	-0.02075	1.42533	-0.39835	1.42533	-0.0598
1.4335	0.3558	1.43333	-0.01765	1.43367	-0.40095	1.43367	-0.0623
1.44183	0.35475	1.44167	-0.01615	1.442	-0.3984	1.442	-0.0605
1.45017	0.35565	1.45	-0.0181	1.45033	-0.3988	1.45033	-0.0607
1.4585	0.3574	1.45833	-0.0188	1.45867	-0.3998	1.45867	-0.06305
1.46683	0.3572	1.46667	-0.01755	1.467	-0.39885	1.467	-0.06245
1.47517	0.3555	1.475	-0.0188	1.47533	-0.3987	1.47533	-0.06085
1.4835	0.35865	1.48333	-0.01915	1.48367	-0.39575	1.48367	-0.05845
1.49183	0.356	1.49167	-0.02	1.492	-0.3985	1.492	-0.0614
1.50017	0.3578	1.5	-0.0216	1.50033	-0.39835	1.50033	-0.0607
1.5085	0.35735	1.50833	-0.02125	1.50867	-0.3992	1.50867	-0.0614
1.51683	0.35585	1.51667	-0.02485	1.517	-0.3968	1.517	-0.05845
1.52517	0.3571	1.525	-0.0291	1.52533	-0.39765	1.52533	-0.0596
1.5335	0.3562	1.53333	-0.07715	1.53367	-0.3976	1.53367	-0.06205
1.54183	0.35385	1.54167	0.0161	1.542	-0.39855	1.542	-0.0619
1.55017	0.35955	1.55	0.17025	1.55033	-0.39725	1.55033	-0.05815
1.5585	0.3579	1.55833	-0.01165	1.55867	-0.39695	1.55867	-0.05935
1.56683	0.3577	1.56667	-0.04245	1.567	-0.39575	1.567	-0.05805
1.57517	0.3558	1.575	-0.0271	1.57533	-0.39705	1.57533	-0.0578
1.5835	0.3568	1.58333	-0.02405	1.58367	-0.39615	1.58367	-0.0577
1.59183	0.3558	1.59167	-0.0234	1.592	-0.39825	1.592	-0.06145
1.60017	0.35535	1.6	-0.02295	1.60033	-0.3981	1.60033	-0.05995
1.6085	0.35455	1.60833	-0.022	1.60867	-0.39865	1.60867	-0.0611
1.61683	0.35475	1.61667	-0.0205	1.617	-0.39825	1.617	-0.06245
1.62517	0.35435	1.625	-0.0241	1.62533	-0.39955	1.62533	-0.06345
1.6335	0.3557	1.63333	-0.02145	1.63367	-0.3979	1.63367	-0.0625
1.64183	0.35565	1.64167	-0.0219	1.642	-0.39805	1.642	-0.0635
1.65017	0.35565	1.65	-0.0226	1.65033	-0.3993	1.65033	-0.0647
1.6585	0.35595	1.65833	-0.02275	1.65867	-0.3996	1.65867	-0.06565
1.66683	0.3558	1.66667	-0.02175	1.667	-0.39655	1.667	-0.064
1.67517	0.35605	1.675	-0.0224	1.67533	-0.39735	1.67533	-0.06245
1.6835	0.3562	1.68333	-0.02085	1.68367	-0.3974	1.68367	-0.066
1.69183	0.35695	1.69167	-0.0216	1.692	-0.397	1.692	-0.0661
1.70017	0.3566	1.7	-0.0219	1.70033	-0.3961	1.70033	-0.0645
1.7085	0.35675	1.70833	-0.0219	1.70867	-0.398	1.70867	-0.0661
1.71683	0.35525	1.71667	-0.0204	1.717	-0.3961	1.717	-0.06685
1.72517	0.35475	1.725	-0.0218	1.72533	-0.3969	1.72533	-0.06525
1.7335	0.3558	1.73333	-0.02235	1.73367	-0.3967	1.73367	-0.0648
1.74183	0.3568	1.74167	-0.02175	1.742	-0.3963	1.742	-0.0635
1.75017	0.3543	1.75	-0.02215	1.75033	-0.39545	1.75033	-0.0635
1.7585	0.35525	1.75833	-0.02415	1.75867	-0.39765	1.75867	-0.0629
1.76683	0.35585	1.76667	-0.0212	1.767	-0.39625	1.767	-0.06215
1.77517	0.35425	1.775	-0.02245	1.77533	-0.39495	1.77533	-0.06315
1.7835	0.3532	1.78333	-0.01905	1.78367	-0.397	1.78367	-0.06695
1.79183	0.3537	1.79167	-0.02105	1.792	-0.3952	1.792	-0.0655
1.80017	0.35375	1.8	-0.02315	1.80033	-0.3963	1.80033	-0.0672
1.8085	0.35435	1.80833	-0.02335	1.80867	-0.3977	1.80867	-0.0685
1.81683	0.3532	1.81667	-0.02155	1.817	-0.39605	1.817	-0.0681
1.82517	0.3542	1.825	-0.02305	1.82533	-0.39815	1.82533	-0.07185
1.8335	0.35375	1.83333	-0.02465	1.83367	-0.39815	1.83367	-0.07195
1.84183	0.35315	1.84167	-0.02055	1.842	-0.39715	1.842	-0.07225
1.85017	0.3535	1.85	-0.0233	1.85033	-0.39525	1.85033	-0.07115
1.8585	0.35255	1.85833	-0.02305	1.85867	-0.3965	1.85867	-0.0722
1.86683	0.3539	1.86667	-0.02415	1.867	-0.3981	1.867	-0.0714
1.87517	0.3544	1.875	-0.0234	1.87533	-0.3986	1.87533	-0.07265
1.8835	0.3523	1.88333	-0.0235	1.88367	-0.3966	1.88367	-0.07255
1.89183	0.3535	1.89167	-0.0222	1.892	-0.396	1.892	-0.07115
1.90017	0.3498	1.9	-0.0245	1.90033	-0.39725	1.90033	-0.0732
1.9085	0.3516	1.90833	-0.0249	1.90867	-0.3967	1.90867	-0.07475
1.91683	0.35015	1.91667	-0.0259	1.917	-0.39715	1.917	-0.0747
1.92517	0.35155	1.925	-0.0267	1.92533	-0.3993	1.92533	-0.0733
1.9335	0.35045	1.93333	-0.0254	1.93367	-0.39885	1.93367	-0.0752
1.94183	0.35075	1.94167	-0.02365	1.942	-0.3978	1.942	-0.07485
1.95017	0.3495	1.95	-0.02805	1.95033	-0.3975	1.95033	-0.0739
1.9585	0.34925	1.95833	-0.0268	1.95867	-0.39855	1.95867	-0.0759
1.96683	0.3474	1.96667	-0.0273	1.967	-0.39825	1.967	-0.0755
1.97517	0.34825	1.975	-0.02675	1.97533	-0.3981	1.97533	-0.0773
1.9835	0.34595	1.98333	-0.0279	1.98367	-0.39675	1.98367	-0.07805
1.99183	0.3477	1.99167	-0.0271	1.992	-0.39755	1.992	-0.0796
2.00017	0.3457	2	-0.0279	2.00033	-0.3964	2.00033	-0.0787
2.0085	0.3456	2.00833	-0.02875	2.00867	-0.3988	2.00867	-0.082
2.01683	0.3466	2.01667	-0.0298	2.017	-0.39825	2.017	-0.0822
2.02517	0.3466	2.025	-0.0296	2.02533	-0.3983	2.02533	-0.08365
2.0335	0.34665	2.03333	-0.0294	2.03367	-0.40015	2.03367	-0.08635
2.04183	0.34685	2.04167	-0.03015	2.042	-0.39565	2.042	-0.08365
2.05017	0.34875	2.05	-0.02805	2.05033	-0.39945	2.05033	-0.08435
2.0585	0.34775	2.05833	-0.02665	2.05867	-0.3981	2.05867	-0.08575
2.06683	0.3457	2.06667	-0.02965	2.067	-0.4009	2.067	-0.0879
2.07517	0.3397	2.075	-0.03165	2.07533	-0.40825	2.07533	-0.09745
2.0835	0.3177	2.08333	-0.0396	2.08367	-0.4326	2.08367	-0.119
2.09183	0.267	2.09167	-0.0572	2.092	-0.4791	2.092	-0.16405
2.10017	0.1738	2.1	-0.0773	2.10033	-0.5418	2.10033	-0.2279
2.1085	0.06915	2.10833	-0.0865	2.10867	-0.6065	2.10867	-0.28955
2.11683	-0.0225	2.11667	-0.06995	2.117	-0.6471	2.117	-0.3325
2.12517	-0.07	2.125	-0.02075	2.12533	-0.6474	2.12533	-0.3392
2.1335	-0.05885	2.13333	0.0531	2.13367	-0.59865	2.13367	-0.3026
2.14183	0.0172	2.14167	0.15555	2.142	-0.50515	2.142	-0.2305
2.15017	0.13455	2.15	0.2604	2.15033	-0.37535	2.15033	-0.12455
2.1585	0.2908	2.15833	0.3781	2.15867	-0.2013	2.15867	0.02245
2.16683	0.49495	2.16667	0.50245	2.167	0.04015	2.167	0.2332
2.17517	0.78	2.175	0.64535	2.17533	0.3903	2.17533	0.52825
2.1835	1.22505	2.18333	0.81285	2.18367	0.9791	2.18367	0.9227
2.19183	2.06405	2.19167	1.00755	2.192	2.2074	2.192	1.46055
2.20017	3.7568	2.2	1.23185	2.20033	4.88255	2.20033	2.22515
2.2085	6.8659	2.20833	1.49585	2.20867	9.98245	2.20867	3.3265
2.21683	11.6984	2.21667	1.80125	2.217	18.0059	2.217	4.82855
2.22517	18.0099	2.225	2.14785	2.22533	28.4292	2.22533	6.66985
2.2335	24.9621	2.23333	2.5046	2.23367	39.7957	2.23367	8.6688
2.24183	31.484	2.24167	2.83955	2.242	50.3128	2.242	10.5757
2.25017	36.6701	2.25	3.1103	2.25033	58.5883	2.25033	12.1639
2.2585	40.0387	2.25833	3.2934	2.25867	64.0109	2.25867	13.2704
2.26683	41.5074	2.26667	3.3784	2.267	66.5546	2.267	13.8501
2.27517	41.3088	2.275	3.3735	2.27533	66.541	2.27533	13.9232
2.2835	39.809	2.28333	3.2922	2.28367	64.4898	2.28367	13.5849
2.29183	37.4136	2.29167	3.15775	2.292	60.9158	2.292	12.9382
2.30017	34.474	2.3	2.9888	2.30033	56.3152	2.30033	12.0945
2.3085	31.2817	2.30833	2.8072	2.30867	51.1439	2.30867	11.1497
2.31683	28.0397	2.31667	2.6234	2.317	45.7641	2.317	10.1808
2.32517	24.9027	2.325	2.4439	2.32533	40.4572	2.32533	9.2353
2.3335	21.9638	2.33333	2.2831	2.33367	35.43	2.33367	8.3523
2.34183	19.2728	2.34167	2.1383	2.342	30.8122	2.342	7.54385
2.35017	16.86	2.35	2.01035	2.35033	26.6731	2.35033	6.8197
2.3585	14.733	2.35833	1.90065	2.35867	23.0325	2.35867	6.1862
2.36683	12.8776	2.36667	1.80895	2.367	19.8849	2.367	5.6423
2.37517	11.2812	2.375	1.7284	2.37533	17.2067	2.37533	5.1806
2.3835	9.9186	2.38333	1.6641	2.38367	14.954	2.38367	4.791
2.39183	8.7612	2.39167	1.61015	2.392	13.0756	2.392	4.46575
2.40017	7.7808	2.4	1.5618	2.40033	11.5204	2.40033	4.1961
2.4085	6.9466	2.40833	1.5189	2.40867	10.2304	2.40867	3.96905
2.41683	6.23975	2.41667	1.4795	2.417	9.15865	2.417	3.77825
2.42517	5.6313	2.425	1.4422	2.42533	8.2593	2.42533	3.61815
2.4335	5.11155	2.43333	1.4115	2.43367	7.5076	2.43367	3.4785
2.44183	4.6644	2.44167	1.38155	2.442	6.8816	2.442	3.3615
2.45017	4.2791	2.45	1.35615	2.45033	6.3542	2.45033	3.26475
2.4585	3.95065	2.45833	1.33395	2.45867	5.9059	2.45867	3.18275
2.46683	3.66765	2.46667	1.3118	2.467	5.5319	2.467	3.11865
2.47517	3.42515	2.475	1.28965	2.47533	5.2119	2.47533	3.06715
2.4835	3.21745	2.48333	1.2662	2.48367	4.9383	2.48367	3.02525
2.49183	3.0371	2.49167	1.2432	2.492	4.69955	2.492	2.99085
2.50017	2.88115	2.5	1.21885	2.50033	4.4875	2.50033	2.95745
2.5085	2.74085	2.50833	1.19255	2.50867	4.29675	2.50867	2.9263
2.51683	2.6173	2.51667	1.1651	2.517	4.1213	2.517	2.89495
2.52517	2.50765	2.525	1.13955	2.52533	3.95955	2.52533	2.86085
2.5335	2.40625	2.53333	1.11315	2.53367	3.8093	2.53367	2.82925
2.54183	2.31315	2.54167	1.08935	2.542	3.6677	2.542	2.80125
2.55017	2.2276	2.55	1.06185	2.55033	3.53745	2.55033	2.77655
2.5585	2.14385	2.55833	1.03835	2.55867	3.4123	2.55867	2.75345
2.56683	2.0659	2.56667	1.0166	2.567	3.2937	2.567	2.7298
2.57517	1.9927	2.575	0.99535	2.57533	3.1796	2.57533	2.7021
2.5835	1.92505	2.58333	0.97335	2.58367	3.0692	2.58367	2.66715
2.59183	1.85785	2.59167	0.9549	2.592	2.95915	2.592	2.62575
2.60017	1.79805	2.6	0.9375	2.60033	2.8509	2.60033	2.574
2.6085	1.7425	2.60833	0.9236	2.60867	2.74495	2.60867	2.5191
2.61683	1.6917	2.61667	0.90955	2.617	2.64215	2.617	2.4578
2.62517	1.64395	2.625	0.89165	2.62533	2.54325	2.62533	2.39255
2.6335	1.5997	2.63333	0.877	2.63367	2.44895	2.63367	2.3303
2.64183	1.5613	2.64167	0.8647	2.642	2.3569	2.642	2.2672
2.65017	1.527	2.65	0.85785	2.65033	2.26715	2.65033	2.20535
2.6585	1.4969	2.65833	0.85505	2.65867	2.1825	2.65867	2.14405
2.66683	1.4686	2.66667	0.85305	2.667	2.10075	2.667	2.0858
2.67517	1.4458	2.675	0.85095	2.67533	2.02205	2.67533	2.033
2.6835	1.4228	2.68333	0.8468	2.68367	1.95415	2.68367	1.9902
2.69183	1.39865	2.69167	0.8419	2.692	1.89695	2.692	1.9612
2.70017	1.3784	2.7	0.83705	2.70033	1.8561	2.70033	1.95715
2.7085	1.3549	2.70833	0.83195	2.70867	1.8302	2.70867	1.971
2.71683	1.33465	2.71667	0.8329	2.717	1.82475	2.717	2.00725
2.72517	1.3221	2.725	0.8469	2.72533	1.8271	2.72533	2.05285
2.7335	1.31435	2.73333	0.91365	2.73367	1.8389	2.73367	2.10315
2.74183	1.3159	2.74167	0.8108	2.742	1.8559	2.742	2.1457
2.75017	1.3193	2.75	0.89815	2.75033	1.87235	2.75033	2.1807
2.7585	1.3293	2.75833	0.96445	2.75867	1.89405	2.75867	2.2045
2.76683	1.35415	2.76667	1.00095	2.767	1.9158	2.767	2.22225
2.77517	1.3826	2.775	1.03895	2.77533	1.9446	2.77533	2.24065
2.7835	1.4164	2.78333	1.08045	2.78367	1.9795	2.78367	2.2607
2.79183	1.4539	2.79167	1.119	2.792	2.0235	2.792	2.2895
2.80017	1.49055	2.8	1.15495	2.80033	2.06525	2.80033	2.3196
2.8085	1.5223	2.80833	1.1838	2.80867	2.11095	2.80867	2.3487
2.81683	1.5497	2.81667	1.2079	2.817	2.15105	2.817	2.378
2.82517	1.57325	2.825	1.2225	2.82533	2.18975	2.82533	2.4069
2.8335	1.58845	2.83333	1.235	2.83367	2.22135	2.83367	2.43135
2.84183	1.5977	2.84167	1.23885	2.842	2.2425	2.842	2.44845
2.85017	1.6065	2.85	1.24105	2.85033	2.257	2.85033	2.45755
2.8585	1.61665	2.85833	1.2397	2.85867	2.263	2.85867	2.4597
2.86683	1.63495	2.86667	1.2343	2.867	2.26135	2.867	2.45505
2.87517	1.6654	2.875	1.22985	2.87533	2.25285	2.87533	2.44255
2.8835	1.7162	2.88333	1.2232	2.88367	2.2383	2.88367	2.42755
2.89183	1.78995	2.89167	1.21515	2.892	2.22025	2.892	2.4068
2.90017	1.87785	2.9	1.2031	2.90033	2.19755	2.90033	2.3829
2.9085	1.97225	2.90833	1.19325	2.90867	2.17435	2.90867	2.35565
2.91683	2.0591	2.91667	1.1828	2.917	2.14775	2.917	2.32385
2.92517	2.1284	2.925	1.1754	2.92533	2.1245	2.92533	2.2894
2.9335	2.1705	2.93333	1.17785	2.93367	2.1056	2.93367	2.25195
2.94183	2.18635	2.94167	1.2197	2.942	2.10485	2.942	2.21365
2.95017	2.182	2.95	1.0854	2.95033	2.12965	2.95033	2.1745
2.9585	2.1615	2.95833	1.1258	2.95867	2.19015	2.95867	2.13645
2.96683	2.12965	2.96667	1.13045	2.967	2.28845	2.967	2.1009
2.97517	2.09525	2.975	1.11015	2.97533	2.4195	2.97533	2.0693
2.9835	2.05465	2.98333	1.0933	2.98367	2.56385	2.98367	2.04385
2.99183	2.01605	2.99167	1.0838	2.992	2.69855	2.992	2.01545
3.00017	1.9758	3	1.07175	3.00033	2.8131	3.00033	1.9939
3.0085	1.9408	3.00833	1.0636	3.00867	2.89045	3.00867	1.97255
3.01683	1.90745	3.01667	1.0653	3.017	2.93025	3.017	1.9531
3.02517	1.8753	3.025	1.0436	3.02533	2.9332	3.02533	1.93495
3.0335	1.84475	3.03333	1.03145	3.03367	2.915	3.03367	1.9166
3.04183	1.8173	3.04167	1.02255	3.042	2.87385	3.042	1.8969
3.05017	1.7903	3.05	1.0114	3.05033	2.82135	3.05033	1.8782
3.0585	1.76295	3.05833	1.0005	3.05867	2.76015	3.05867	1.85845
3.06683	1.73675	3.06667	0.99095	3.067	2.69715	3.067	1.8391
3.07517	1.71005	3.075	0.981	3.07533	2.63275	3.07533	1.82005
3.0835	1.68455	3.08333	0.97095	3.08367	2.5702	3.08367	1.8009
3.09183	1.65975	3.09167	0.96105	3.092	2.51115	3.092	1.78235
3.10017	1.6365	3.1	0.94935	3.10033	2.45555	3.10033	1.76115
3.1085	1.61385	3.10833	0.9405	3.10867	2.4052	3.10867	1.74285
3.11683	1.5931	3.11667	0.9286	3.117	2.36055	3.117	1.7244
3.12517	1.5709	3.125	0.91655	3.12533	2.31735	3.12533	1.7039
3.1335	1.5507	3.13333	0.90505	3.13367	2.2784	3.13367	1.68795
3.14183	1.5331	3.14167	0.8924	3.142	2.2397	3.142	1.6702
3.15017	1.51465	3.15	0.8825	3.15033	2.2045	3.15033	1.6528
3.1585	1.49445	3.15833	0.8709	3.15867	2.16755	3.15867	1.63405
3.16683	1.47835	3.16667	0.86	3.167	2.13215	3.167	1.61975
3.17517	1.45885	3.175	0.85145	3.17533	2.0969	3.17533	1.60375
3.1835	1.4416	3.18333	0.8399	3.18367	2.0608	3.18367	1.58785
3.19183	1.42445	3.19167	0.82815	3.192	2.02505	3.192	1.5725
3.20017	1.40745	3.2	0.81685	3.20033	1.99105	3.20033	1.5592
3.2085	1.39225	3.20833	0.8048	3.20867	1.9551	3.20867	1.54425
3.21683	1.3761	3.21667	0.7963	3.217	1.9195	3.217	1.52735
3.22517	1.36265	3.225	0.7847	3.22533	1.8855	3.22533	1.5116
3.2335	1.3509	3.23333	0.77465	3.23367	1.8496	3.23367	1.49525
3.24183	1.34045	3.24167	0.7627	3.242	1.8149	3.242	1.48
3.25017	1.33175	3.25	0.75055	3.25033	1.781	3.25033	1.4652
3.2585	1.324	3.25833	0.7411	3.25867	1.74785	3.25867	1.44905
3.26683	1.31615	3.26667	0.73175	3.267	1.7132	3.267	1.4304
3.27517	1.3088	3.275	0.7221	3.27533	1.681	3.27533	1.41595
3.2835	1.30185	3.28333	0.71355	3.28367	1.64905	3.28367	1.39855
3.29183	1.2918	3.29167	0.7059	3.292	1.6212	3.292	1.3844
3.30017	1.2823	3.3	0.6992	3.30033	1.59345	3.30033	1.36905
3.3085	1.2728	3.30833	0.69145	3.30867	1.5721	3.30867	1.358
3.31683	1.2629	3.31667	0.68285	3.317	1.55535	3.317	1.3508
3.32517	1.25525	3.325	0.67905	3.32533	1.54695	3.32533	1.34805
3.3335	1.24395	3.33333	0.67575	3.33367	1.54805	3.33367	1.35105
3.34183	1.23555	3.34167	0.6725	3.342	1.55505	3.342	1.3567
3.35017	1.2258	3.35	0.67065	3.35033	1.5782	3.35033	1.37435
3.3585	1.2165	3.35833	0.66685	3.35867	1.60375	3.35867	1.39465
3.36683	1.20985	3.36667	0.6639	3.367	1.638	3.367	1.4177
3.37517	1.20055	3.375	0.6621	3.37533	1.6912	3.37533	1.4613
3.3835	1.1898	3.38333	0.65855	3.38367	1.7845	3.38367	1.54425
3.39183	1.1835	3.39167	0.65305	3.392	1.7361	3.392	1.48785
3.40017	1.17125	3.4	0.64885	3.40033	1.75075	3.40033	1.4923
3.4085	1.16535	3.40833	0.6439	3.40867	1.80925	3.40867	1.54255
3.41683	1.15355	3.41667	0.63685	3.417	1.8237	3.417	1.55055
3.42517	1.1446	3.425	0.6363	3.42533	1.8268	3.42533	1.55215
3.4335	1.13495	3.43333	0.62995	3.43367	1.83395	3.43367	1.5551
3.44183	1.12615	3.44167	0.62535	3.442	1.8315	3.442	1.55205
3.45017	1.1167	3.45	0.62175	3.45033	1.82895	3.45033	1.5488
3.4585	1.1102	3.45833	0.61715	3.45867	1.82325	3.45867	1.5438
3.46683	1.1009	3.46667	0.61365	3.467	1.8169	3.467	1.5367
3.47517	1.09425	3.475	0.6057	3.47533	1.80755	3.47533	1.52815
3.4835	1.0894	3.48333	0.5996	3.48367	1.79875	3.48367	1.51965
3.49183	1.0844	3.49167	0.5911	3.492	1.7919	3.492	1.51195
3.50017	1.07435	3.5	0.58675	3.50033	1.78335	3.50033	1.50375
3.5085	1.0691	3.50833	0.57955	3.50867	1.7723	3.50867	1.49455
3.51683	1.0615	3.51667	0.57235	3.517	1.7642	3.517	1.48795
3.52517	1.0548	3.525	0.5652	3.52533	1.75375	3.52533	1.47775
3.5335	1.0473	3.53333	0.5582	3.53367	1.7445	3.53367	1.469
3.54183	1.03905	3.54167	0.55275	3.542	1.7379	3.542	1.4634
3.55017	1.03225	3.55	0.54845	3.55033	1.72835	3.55033	1.4575
3.5585	1.0222	3.55833	0.5426	3.55867	1.72625	3.55867	1.4559
3.56683	1.01645	3.56667	0.5383	3.567	1.72905	3.567	1.45895
3.57517	1.00665	3.575	0.5324	3.57533	1.56395	3.57533	1.29545
3.5835	0.9998	3.58333	0.5283	3.58367	1.6941	3.58367	1.4269
3.59183	0.9899	3.59167	0.5243	3.592	1.7038	3.592	1.43585
3.60017	0.982	3.6	0.519	3.60033	1.68885	3.60033	1.4215
3.6085	0.97455	3.60833	0.5129	3.60867	1.67715	3.60867	1.41075
3.61683	0.969	3.61667	0.50795	3.617	1.6691	3.617	1.4027
3.62517	0.95905	3.625	0.50305	3.62533	1.66085	3.62533	1.3965
3.6335	0.9515	3.63333	0.49845	3.63367	1.6551	3.63367	1.38965
3.64183	0.9467	3.64167	0.49095	3.642	1.65035	3.642	1.38495
3.65017	0.9414	3.65	0.48795	3.65033	1.64425	3.65033	1.38045
3.6585	0.9338	3.65833	0.48455	3.65867	1.6373	3.65867	1.37145
3.66683	0.92665	3.66667	0.4804	3.667	1.6289	3.667	1.36365
3.67517	0.92105	3.675	0.47705	3.67533	1.6233	3.67533	1.3571
3.6835	0.9158	3.68333	0.47725	3.68367	1.61955	3.68367	1.3529
3.69183	0.9098	3.69167	0.47755	3.692	1.61315	3.692	1.3475
3.70017	0.90375	3.7	0.4742	3.70033	1.61085	3.70033	1.34455
3.7085	0.8998	3.70833	0.476	3.70867	1.60515	3.70867	1.33795
3.71683	0.8949	3.71667	0.47275	3.717	1.5978	3.717	1.3305
3.72517	0.8885	3.725	0.47535	3.72533	1.5906	3.72533	1.32555
3.7335	0.88435	3.73333	0.4747	3.73367	1.5852	3.73367	1.3225
3.74183	0.8782	3.74167	0.4757	3.742	1.5798	3.742	1.31445
3.75017	0.8733	3.75	0.47395	3.75033	1.57285	3.75033	1.3069
3.7585	0.869	3.75833	0.4721	3.75867	1.5666	3.75867	1.3022
3.76683	0.8656	3.76667	0.47345	3.767	1.56025	3.767	1.29495
3.77517	0.864	3.775	0.47145	3.77533	1.55485	3.77533	1.28965
3.7835	0.8623	3.78333	0.47095	3.78367	1.54755	3.78367	1.28025
3.79183	0.86055	3.79167	0.4704	3.792	1.54015	3.792	1.27415
3.80017	0.86365	3.8	0.467	3.80033	1.5353	3.80033	1.27075
3.8085	0.8667	3.80833	0.4649	3.80867	1.5277	3.80867	1.26265
3.81683	0.87055	3.81667	0.46105	3.817	1.5215	3.817	1.25745
3.82517	0.8776	3.825	0.4582	3.82533	1.5157	3.82533	1.25225
3.8335	0.883	3.83333	0.452	3.83367	1.50885	3.83367	1.24485
3.84183	0.8894	3.84167	0.44885	3.842	1.50465	3.842	1.2403
3.85017	0.8952	3.85	0.44355	3.85033	1.49865	3.85033	1.2345
3.8585	0.8963	3.85833	0.44015	3.85867	1.4935	3.85867	1.2294
3.86683	0.8977	3.86667	0.43505	3.867	1.4884	3.867	1.2226
3.87517	0.8946	3.875	0.42905	3.87533	1.48295	3.87533	1.2191
3.8835	0.8919	3.88333	0.42835	3.88367	1.4801	3.88367	1.21515
3.89183	0.8878	3.89167	0.4239	3.892	1.4737	3.892	1.2088
3.90017	0.88255	3.9	0.41745	3.90033	1.47085	3.90033	1.2045
3.9085	0.8769	3.90833	0.41675	3.90867	1.4685	3.90867	1.1999
3.91683	0.8713	3.91667	0.41185	3.917	1.46605	3.917	1.19765
3.92517	0.86485	3.925	0.4077	3.92533	1.46325	3.92533	1.197
3.9335	0.8571	3.93333	0.4056	3.93367	1.4579	3.93367	1.18955
3.94183	0.84845	3.94167	0.40495	3.942	1.4559	3.942	1.187
3.95017	0.8416	3.95	0.40255	3.95033	1.45365	3.95033	1.18335
3.9585	0.83515	3.95833	0.40295	3.95867	1.4527	3.95867	1.18195
3.96683	0.82565	3.96667	0.3998	3.967	1.45035	3.967	1.1797
3.97517	0.81765	3.975	0.39725	3.97533	1.4489	3.97533	1.1747
3.9835	0.8142	3.98333	0.39625	3.98367	1.4451	3.98367	1.17445
3.99183	0.8063	3.99167	0.3916	3.992	1.4435	3.992	1.17095
4.00017	0.79985	4	0.3906	4.00033	1.4393	4.00033	1.1664
4.0085	0.7935	4.00833	0.38615	4.00867	1.4355	4.00867	1.161
4.01683	0.7887	4.01667	0.38645	4.017	1.43025	4.017	1.15605
4.02517	0.7843	4.025	0.3814	4.02533	1.4271	4.02533	1.1509
4.0335	0.77785	4.03333	0.3823	4.03367	1.4223	4.03367	1.14355
4.04183	0.7748	4.04167	0.3788	4.042	1.416	4.042	1.13585
4.05017	0.7702	4.05	0.37885	4.05033	1.4117	4.05033	1.1297
4.0585	0.76455	4.05833	0.376	4.05867	1.40835	4.05867	1.1235
4.06683	0.7601	4.06667	0.37155	4.067	1.40945	4.067	1.11725
4.07517	0.7579	4.075	0.37335	4.07533	1.4049	4.07533	1.11115
4.0835	0.7549	4.08333	0.37085	4.08367	1.39975	4.08367	1.1052
4.09183	0.75065	4.09167	0.36935	4.092	1.3932	4.092	1.09915
4.10017	0.7494	4.1	0.3681	4.10033	1.3886	4.10033	1.0936
4.1085	0.74865	4.10833	0.3681	4.10867	1.38375	4.10867	1.09025
4.11683	0.74875	4.11667	0.3676	4.117	1.3789	4.117	1.08475
4.12517	0.7489	4.125	0.3696	4.12533	1.3769	4.12533	1.08145
4.1335	0.7503	4.13333	0.36675	4.13367	1.37495	4.13367	1.0772
4.14183	0.74995	4.14167	0.3671	4.142	1.3698	4.142	1.07245
4.15017	0.74905	4.15	0.36825	4.15033	1.36785	4.15033	1.06815
4.1585	0.75025	4.15833	0.36715	4.15867	1.3643	4.15867	1.0624
4.16683	0.7465	4.16667	0.3647	4.167	1.36125	4.167	1.0588
4.17517	0.74875	4.175	0.36485	4.17533	1.35815	4.17533	1.0563
4.1835	0.74535	4.18333	0.3659	4.18367	1.35705	4.18367	1.052
4.19183	0.74675	4.19167	0.3659	4.192	1.35435	4.192	1.049
4.20017	0.74175	4.2	0.3654	4.20033	1.35675	4.20033	1.04865
4.2085	0.74005	4.20833	0.36715	4.20867	1.35735	4.20867	1.05025
4.21683	0.73855	4.21667	0.3649	4.217	1.35945	4.217	1.0476
4.22517	0.7353	4.225	0.36355	4.22533	1.36555	4.22533	1.0504
4.2335	0.7301	4.23333	0.36195	4.23367	1.3685	4.23367	1.04885
4.24183	0.73035	4.24167	0.3626	4.242	1.37415	4.242	1.05145
4.25017	0.72455	4.25	0.36285	4.25033	1.3813	4.25033	1.0548
4.2585	0.72185	4.25833	0.36255	4.25867	1.38345	4.25867	1.0548
4.26683	0.7212	4.26667	0.36185	4.267	1.3865	4.267	1.0558
4.27517	0.71875	4.275	0.3623	4.27533	1.38605	4.27533	1.053
4.2835	0.71575	4.28333	0.36055	4.28367	1.3887	4.28367	1.05345
4.29183	0.71525	4.29167	0.3627	4.292	1.3878	4.292	1.05255
4.30017	0.71385	4.3	0.36445	4.30033	1.385	4.30033	1.0486
4.3085	0.71035	4.30833	0.3629	4.30867	1.3806	4.30867	1.0454
4.31683	0.707	4.31667	0.36365	4.317	1.37425	4.317	1.03855
4.32517	0.7074	4.325	0.35995	4.32533	1.37005	4.32533	1.03665
4.3335	0.7031	4.33333	0.3595	4.33367	1.3654	4.33367	1.03495
4.34183	0.7013	4.34167	0.35955	4.342	1.3632	4.342	1.02985
4.35017	0.6982	4.35	0.35875	4.35033	1.3591	4.35033	1.0272
4.3585	0.6965	4.35833	0.3565	4.35867	1.3551	4.35867	1.02365
4.36683	0.69525	4.36667	0.357	4.367	1.34895	4.367	1.01945
4.37517	0.6922	4.375	0.35505	4.37533	1.3466	4.37533	1.0156
4.3835	0.6911	4.38333	0.35545	4.38367	1.34395	4.38367	1.0134
4.39183	0.6895	4.39167	0.35505	4.392	1.34195	4.392	1.01045
4.40017	0.6887	4.4	0.35235	4.40033	1.3366	4.40033	1.0054
4.4085	0.68665	4.40833	0.3521	4.40867	1.3356	4.40867	1.0016
4.41683	0.68715	4.41667	0.3507	4.417	1.33265	4.417	0.99485
4.42517	0.6854	4.425	0.3499	4.42533	1.3287	4.42533	0.98735
4.4335	0.6837	4.43333	0.3497	4.43367	1.32575	4.43367	0.9816
4.44183	0.68285	4.44167	0.35025	4.442	1.3223	4.442	0.9775
4.45017	0.68125	4.45	0.34765	4.45033	1.3158	4.45033	0.9676
4.4585	0.6822	4.45833	0.34875	4.45867	1.3123	4.45867	0.9621
4.46683	0.6804	4.46667	0.3476	4.467	1.3082	4.467	0.95535
4.47517	0.67875	4.475	0.34535	4.47533	1.30465	4.47533	0.9483
4.4835	0.6774	4.48333	0.34535	4.48367	1.3028	4.48367	0.94685
4.49183	0.67675	4.49167	0.34565	4.492	1.30025	4.492	0.94095
4.50017	0.6764	4.5	0.3455	4.50033	1.2958	4.50033	0.93595
4.5085	0.67535	4.50833	0.34515	4.50867	1.29265	4.50867	0.9323
4.51683	0.6748	4.51667	0.3459	4.517	1.29015	4.517	0.93075
4.52517	0.6735	4.525	0.3453	4.52533	1.28615	4.52533	0.92765
4.5335	0.67285	4.53333	0.34815	4.53367	1.28525	4.53367	0.92445
4.54183	0.6719	4.54167	0.3513	4.542	1.27935	4.542	0.9195
4.55017	0.6723	4.55	0.35395	4.55033	1.2808	4.55033	0.9228
4.5585	0.67255	4.55833	0.36275	4.55867	1.2801	4.55867	0.92425
4.56683	0.67335	4.56667	0.3781	4.567	1.2836	4.567	0.92745
4.57517	0.67195	4.575	0.39785	4.57533	1.2822	4.57533	0.9267
4.5835	0.6773	4.58333	0.4233	4.58367	1.2821	4.58367	0.9275
4.59183	0.67695	4.59167	0.45875	4.592	1.27775	4.592	0.92385
4.60017	0.67845	4.6	0.5022	4.60033	1.27355	4.60033	0.9224
4.6085	0.679	4.60833	0.54935	4.60867	1.2688	4.60867	0.9294
4.61683	0.6821	4.61667	0.5973	4.617	1.2699	4.617	0.94325
4.62517	0.68375	4.625	0.65	4.62533	1.27165	4.62533	0.96975
4.6335	0.684	4.63333	0.70875	4.63367	1.28595	4.63367	1.01825
4.64183	0.68645	4.64167	0.77155	4.642	1.30915	4.642	1.08815
4.65017	0.6869	4.65	0.85755	4.65033	1.3486	4.65033	1.1865
4.6585	0.68245	4.65833	0.9638	4.65867	1.41125	4.65867	1.31465
4.66683	0.6841	4.66667	1.0978	4.667	1.48315	4.667	1.45695
4.67517	0.67985	4.675	1.25895	4.67533	1.558	4.67533	1.60155
4.6835	0.67795	4.68333	1.42155	4.68367	1.62565	4.68367	1.72295
4.69183	0.6742	4.69167	1.5677	4.692	1.6853	4.692	1.82015
4.70017	0.67105	4.7	1.72205	4.70033	1.72475	4.70033	1.8781
4.7085	0.6692	4.70833	1.7978	4.70867	1.74485	4.70867	1.8951
4.71683	0.6666	4.71667	1.80175	4.717	1.74705	4.717	1.8787
4.72517	0.66295	4.725	1.7651	4.72533	1.73015	4.72533	1.82925
4.7335	0.66555	4.73333	1.7222	4.73367	1.7013	4.73367	1.7622
4.74183	0.66325	4.74167	1.6451	4.742	1.6666	4.742	1.6836
4.75017	0.6628	4.75	1.53195	4.75033	1.6251	4.75033	1.59755
4.7585	0.6637	4.75833	1.41615	4.75867	1.5821	4.75867	1.5095
4.76683	0.6641	4.76667	1.3057	4.767	1.54375	4.767	1.4288
4.77517	0.66615	4.775	1.2017	4.77533	1.5062	4.77533	1.3507
4.7835	0.66445	4.78333	1.1032	4.78367	1.46945	4.78367	1.2794
4.79183	0.663	4.79167	1.0101	4.792	1.4391	4.792	1.21425
4.80017	0.6678	4.8	0.9289	4.80033	1.40885	4.80033	1.1574
4.8085	0.66615	4.80833	0.8544	4.80867	1.3841	4.80867	1.10645
4.81683	0.66755	4.81667	0.7868	4.817	1.35935	4.817	1.0613
4.82517	0.66965	4.825	0.73135	4.82533	1.3445	4.82533	1.0258
4.8335	0.67155	4.83333	0.6831	4.83367	1.32805	4.83367	0.995
4.84183	0.6736	4.84167	0.64145	4.842	1.3129	4.842	0.9681
4.85017	0.6773	4.85	0.60685	4.85033	1.30475	4.85033	0.9503
4.8585	0.68285	4.85833	0.57775	4.85867	1.293	4.85867	0.93175
4.86683	0.68725	4.86667	0.5532	4.867	1.28585	4.867	0.9178
4.87517	0.69125	4.875	0.5323	4.87533	1.2796	4.87533	0.90345
4.8835	0.6948	4.88333	0.51435	4.88367	1.2767	4.88367	0.89215
4.89183	0.6977	4.89167	0.5002	4.892	1.27195	4.892	0.8842
4.90017	0.70315	4.9	0.4873	4.90033	1.2703	4.90033	0.8746
4.9085	0.7046	4.90833	0.4787	4.90867	1.2661	4.90867	0.86675
4.91683	0.70855	4.91667	0.47105	4.917	1.266	4.917	0.8619
4.92517	0.7098	4.925	0.4657	4.92533	1.26295	4.92533	0.85675
4.9335	0.71405	4.93333	0.4641	4.93367	1.26015	4.93367	0.84915
4.94183	0.718	4.94167	0.45965	4.942	1.2533	4.942	0.84155
4.95017	0.724	4.95	0.4593	4.95033	1.25355	4.95033	0.8394
4.9585	0.73885	4.95833	0.46	4.95867	1.24855	4.95867	0.83225
4.96683	0.75625	4.96667	0.46065	4.967	1.24465	4.967	0.82475
4.97517	0.78845	4.975	0.4597	4.97533	1.24185	4.97533	0.81995
4.9835	0.83005	4.98333	0.46045	4.98367	1.23725	4.98367	0.813
4.99183	0.88375	4.99167	0.45915	4.992	1.23215	4.992	0.8091
5.00017	0.9478	5	0.46075	5.00033	1.2281	5.00033	0.8038
5.0085	1.0158	5.00833	0.4622	5.00867	1.22505	5.00867	0.80095
5.01683	1.0845	5.01667	0.4626	5.017	1.22285	5.017	0.79695
5.02517	1.149	5.025	0.46335	5.02533	1.2191	5.02533	0.7916
5.0335	1.19965	5.03333	0.46455	5.03367	1.21705	5.03367	0.7896
5.04183	1.2384	5.04167	0.4662	5.042	1.21515	5.042	0.7873
5.05017	1.2568	5.05	0.4696	5.05033	1.2111	5.05033	0.78485
5.0585	1.25865	5.05833	0.4725	5.05867	1.21095	5.05867	0.78335
5.06683	1.24205	5.06667	0.478	5.067	1.2124	5.067	0.78325
5.07517	1.21755	5.075	0.48055	5.07533	1.21015	5.07533	0.78105
5.0835	1.18345	5.08333	0.48615	5.08367	1.2119	5.08367	0.78375
5.09183	1.1448	5.09167	0.49185	5.092	1.21335	5.092	0.78405
5.10017	1.104	5.1	0.49705	5.10033	1.2178	5.10033	0.78595
5.1085	1.069	5.10833	0.50395	5.10867	1.22225	5.10867	0.7911
5.11683	1.0343	5.11667	0.5108	5.117	1.2234	5.117	0.7924
5.12517	1.00765	5.125	0.51615	5.12533	1.22565	5.12533	0.79475
5.1335	0.98035	5.13333	0.52305	5.13367	1.2281	5.13367	0.7971
5.14183	0.9615	5.14167	0.5317	5.142	1.22935	5.142	0.79795
5.15017	0.94085	5.15	0.54185	5.15033	1.2295	5.15033	0.7974
5.1585	0.9288	5.15833	0.55035	5.15867	1.23295	5.15867	0.79745
5.16683	0.9157	5.16667	0.5621	5.167	1.2321	5.167	0.79825
5.17517	0.90835	5.175	0.5733	5.17533	1.23295	5.17533	0.7962
5.1835	0.8984	5.18333	0.58505	5.18367	1.23005	5.18367	0.79435
5.19183	0.89025	5.19167	0.59695	5.192	1.2343	5.192	0.7928
5.20017	0.88245	5.2	0.61155	5.20033	1.2309	5.20033	0.79245
5.2085	0.87455	5.20833	0.6287	5.20867	1.2298	5.20867	0.7877
5.21683	0.866	5.21667	0.64645	5.217	1.2298	5.217	0.79345
5.22517	0.86085	5.225	0.66545	5.22533	1.23175	5.22533	0.79455
5.2335	0.85365	5.23333	0.6854	5.23367	1.23295	5.23367	0.79325
5.24183	0.8466	5.24167	0.713	5.242	1.23085	5.242	0.78815
5.25017	0.83925	5.25	0.73725	5.25033	1.23025	5.25033	0.78585
5.2585	0.83365	5.25833	0.77045	5.25867	1.2294	5.25867	0.78335
5.26683	0.8283	5.26667	0.79835	5.267	1.2307	5.267	0.78215
5.27517	0.82295	5.275	0.83805	5.27533	1.2313	5.27533	0.78325
5.2835	0.81935	5.28333	0.8763	5.28367	1.2358	5.28367	0.7834
5.29183	0.81435	5.29167	0.9225	5.292	1.2383	5.292	0.7867
5.30017	0.81505	5.3	0.9798	5.30033	1.24585	5.30033	0.79335
5.3085	0.81495	5.30833	1.0635	5.30867	1.25475	5.30867	0.8051
5.31683	0.81475	5.31667	1.22475	5.317	1.27185	5.317	0.82445
5.32517	0.81715	5.325	1.58525	5.32533	1.29705	5.32533	0.8549
5.3335	0.81925	5.33333	2.36175	5.33367	1.3367	5.33367	0.90085
5.34183	0.8176	5.34167	3.79675	5.342	1.3896	5.342	0.96255
5.35017	0.8199	5.35	6.0812	5.35033	1.4618	5.35033	1.04655
5.3585	0.8209	5.35833	9.2359	5.35867	1.5513	5.35867	1.14845
5.36683	0.81855	5.36667	13.0645	5.367	1.65785	5.367	1.26715
5.37517	0.8163	5.375	17.2096	5.37533	1.7751	5.37533	1.39315
5.3835	0.8146	5.38333	21.2449	5.38367	1.8958	5.38367	1.51705
5.39183	0.8169	5.39167	24.833	5.392	2.009	5.392	1.633
5.40017	0.8161	5.4	27.7482	5.40033	2.10695	5.40033	1.7237
5.4085	0.8166	5.40833	29.9187	5.40867	2.1815	5.40867	1.7858
5.41683	0.8183	5.41667	31.4228	5.417	2.22205	5.417	1.81605
5.42517	0.8196	5.425	32.3792	5.42533	2.23435	5.42533	1.81415
5.4335	0.82145	5.43333	32.9046	5.43367	2.2126	5.43367	1.77825
5.44183	0.8224	5.44167	33.1029	5.442	2.17105	5.442	1.7229
5.45017	0.82355	5.45	33.047	5.45033	2.107	5.45033	1.65385
5.4585	0.8264	5.45833	32.7786	5.45867	2.0367	5.45867	1.57605
5.46683	0.82755	5.46667	32.3302	5.467	1.9696	5.467	1.50415
5.47517	0.8305	5.475	31.7373	5.47533	1.9147	5.47533	1.4537
5.4835	0.83325	5.48333	31.0357	5.48367	1.88805	5.48367	1.4316
5.49183	0.8381	5.49167	30.2559	5.492	1.9042	5.492	1.46345
5.50017	0.8381	5.5	29.4311	5.50033	1.9923	5.50033	1.57185
5.5085	0.8426	5.50833	28.577	5.50867	2.1798	5.50867	1.7858
5.51683	0.8454	5.51667	27.714	5.517	2.49365	5.517	2.12795
5.52517	0.84795	5.525	26.848	5.52533	2.96085	5.52533	2.62085
5.5335	0.85125	5.53333	25.9923	5.53367	3.58685	5.53367	3.26155
5.54183	0.8555	5.54167	25.1487	5.542	4.35955	5.542	4.02775
5.55017	0.86355	5.55	24.3311	5.55033	5.234	5.55033	4.86965
5.5585	0.8677	5.55833	23.5238	5.55867	6.141	5.55867	5.7137
5.56683	0.87215	5.56667	22.7396	5.567	6.9971	5.567	6.47805
5.57517	0.87865	5.575	21.9816	5.57533	7.71485	5.57533	7.0861
5.5835	0.8863	5.58333	21.2496	5.58367	8.22535	5.58367	7.4829
5.59183	0.8949	5.59167	20.5448	5.592	8.48975	5.592	7.64115
5.60017	0.90465	5.6	19.8524	5.60033	8.50285	5.60033	7.5692
5.6085	0.91285	5.60833	19.203	5.60867	8.28385	5.60867	7.2944
5.61683	0.92245	5.61667	18.5758	5.617	7.87785	5.617	6.8642
5.62517	0.93185	5.625	17.9784	5.62533	7.34115	5.62533	6.3344
5.6335	0.9393	5.63333	17.4055	5.63367	6.73355	5.63367	5.7523
5.64183	0.94895	5.64167	16.8632	5.642	6.0981	5.642	5.15865
5.65017	0.957	5.65	16.3409	5.65033	5.4751	5.65033	4.5834
5.6585	0.96755	5.65833	15.8418	5.65867	4.88625	5.65867	4.0443
5.66683	0.97515	5.66667	15.3673	5.667	4.34895	5.667	3.5528
5.67517	0.9863	5.675	14.9163	5.67533	3.8688	5.67533	3.11945
5.6835	0.9954	5.68333	14.4893	5.68367	3.45565	5.68367	2.7449
5.69183	1.00375	5.69167	14.0795	5.692	3.10335	5.692	2.42165
5.70017	1.0156	5.7	13.6902	5.70033	2.81325	5.70033	2.1526
5.7085	1.02435	5.70833	13.3239	5.70867	2.5788	5.70867	1.9268
5.71683	1.0324	5.71667	12.9705	5.717	2.39715	5.717	1.74425
5.72517	1.0446	5.725	12.6411	5.72533	2.269	5.72533	1.6022
5.7335	1.0573	5.73333	12.3273	5.73367	2.18025	5.73367	1.4925
5.74183	1.0732	5.74167	12.0264	5.742	2.1345	5.742	1.41545
5.75017	1.0848	5.75	11.7421	5.75033	2.1262	5.75033	1.3718
5.7585	1.09905	5.75833	11.4737	5.75867	2.1511	5.75867	1.35605
5.76683	1.11725	5.76667	11.2198	5.767	2.202	5.767	1.36615
5.77517	1.1351	5.775	10.9789	5.77533	2.277	5.77533	1.40665
5.7835	1.15485	5.78333	10.7453	5.78367	2.3666	5.78367	1.46775
5.79183	1.17755	5.79167	10.5251	5.792	2.4705	5.792	1.5495
5.80017	1.20165	5.8	10.3199	5.80033	2.5685	5.80033	1.63345
5.8085	1.22455	5.80833	10.1243	5.80867	2.6538	5.80867	1.71165
5.81683	1.252	5.81667	9.94045	5.817	2.71675	5.817	1.7753
5.82517	1.28185	5.825	9.7667	5.82533	2.74915	5.82533	1.8149
5.8335	1.3131	5.83333	9.6039	5.83367	2.74635	5.83367	1.82205
5.84183	1.3482	5.84167	9.44605	5.842	2.71235	5.842	1.7997
5.85017	1.3813	5.85	9.2992	5.85033	2.6462	5.85033	1.7531
5.8585	1.4216	5.85833	9.1571	5.85867	2.558	5.85867	1.68535
5.86683	1.4612	5.86667	9.02165	5.867	2.4542	5.867	1.607
5.87517	1.49695	5.875	8.89135	5.87533	2.34505	5.87533	1.52105
5.8835	1.53875	5.88333	8.7671	5.88367	2.23605	5.88367	1.4347
5.89183	1.5802	5.89167	8.65115	5.892	2.132	5.892	1.35375
5.90017	1.6233	5.9	8.54245	5.90033	2.0346	5.90033	1.27595
5.9085	1.66795	5.90833	8.43705	5.90867	1.94755	5.90867	1.20675
5.91683	1.7142	5.91667	8.34235	5.917	1.8694	5.917	1.14735
5.92517	1.76305	5.925	8.24865	5.92533	1.8037	5.92533	1.09585
5.9335	1.8166	5.93333	8.16215	5.93367	1.74505	5.93367	1.05105
5.94183	1.86935	5.94167	8.08265	5.942	1.69435	5.942	1.01265
5.95017	1.92965	5.95	8.00045	5.95033	1.65175	5.95033	0.98205
5.9585	1.9901	5.95833	7.9293	5.95867	1.61655	5.95867	0.9544
5.96683	2.05385	5.96667	7.84105	5.967	1.58535	5.967	0.93275
5.97517	2.1241	5.975	7.82135	5.97533	1.5588	5.97533	0.91465
5.9835	2.19725	5.98333	7.80105	5.98367	1.5364	5.98367	0.901
5.99183	2.27455	5.99167	7.71	5.992	1.51745	5.992	0.8877
6.00017	2.35335	6	7.63785	6.00033	1.50455	6.00033	0.87985
6.0085	2.43595	6.00833	7.5937	6.00867	1.49355	6.00867	0.8744
6.01683	2.5213	6.01667	7.55495	6.017	1.48575	6.017	0.8709
6.02517	2.61335	6.025	7.51745	6.02533	1.4807	6.02533	0.8728
6.0335	2.7177	6.03333	7.4808	6.03367	1.4827	6.03367	0.87475
6.04183	2.8378	6.04167	7.449	6.042	1.483	6.042	0.8788
6.05017	3.0058	6.05	7.4196	6.05033	1.486	6.05033	0.8854
6.0585	3.24825	6.05833	7.39425	6.05867	1.48895	6.05867	0.88935
6.06683	3.63405	6.06667	7.37685	6.067	1.49045	6.067	0.89075
6.07517	4.2371	6.075	7.36525	6.07533	1.49195	6.07533	0.89055
6.0835	5.1453	6.08333	7.36155	6.08367	1.48935	6.08367	0.88565
6.09183	6.43245	6.09167	7.36695	6.092	1.4846	6.092	0.87955
6.10017	8.1313	6.1	7.38105	6.10033	1.478	6.10033	0.87135
6.1085	10.2278	6.10833	7.4059	6.10867	1.4722	6.10867	0.8633
6.11683	12.639	6.11667	7.43725	6.117	1.4662	6.117	0.85375
6.12517	15.2486	6.125	7.47575	6.12533	1.4613	6.12533	0.84635
6.1335	17.9096	6.13333	7.5144	6.13367	1.45615	6.13367	0.838
6.14183	20.4844	6.14167	7.55455	6.142	1.45425	6.142	0.83195
6.15017	22.846	6.15	7.5859	6.15033	1.44985	6.15033	0.8265
6.1585	24.9066	6.15833	7.6051	6.15867	1.4493	6.15867	0.82325
6.16683	26.6149	6.16667	7.6129	6.167	1.45	6.167	0.8197
6.17517	27.9546	6.175	7.6069	6.17533	1.4499	6.17533	0.81905
6.1835	28.937	6.18333	7.58505	6.18367	1.4522	6.18367	0.81595
6.19183	29.5916	6.19167	7.5509	6.192	1.45485	6.192	0.8156
6.20017	29.9561	6.2	7.5076	6.20033	1.45635	6.20033	0.8154
6.2085	30.0665	6.20833	7.45985	6.20867	1.45995	6.20867	0.8166
6.21683	29.967	6.21667	7.40435	6.217	1.46405	6.217	0.8175
6.22517	29.6968	6.225	7.3471	6.22533	1.4694	6.22533	0.81905
6.2335	29.2895	6.23333	7.2917	6.23367	1.4744	6.23367	0.8225
6.24183	28.7541	6.24167	7.2388	6.242	1.47975	6.242	0.8269
6.25017	28.1367	6.25	7.19185	6.25033	1.48375	6.25033	0.82845
6.2585	27.467	6.25833	7.1475	6.25867	1.4888	6.25867	0.8309
6.26683	26.7574	6.26667	7.10485	6.267	1.4944	6.267	0.8334
6.27517	26.0257	6.275	7.06975	6.27533	1.50275	6.27533	0.83655
6.2835	25.2939	6.28333	7.0362	6.28367	1.50895	6.28367	0.8394
6.29183	24.552	6.29167	7.01135	6.292	1.51735	6.292	0.84295
6.30017	23.8127	6.3	6.9868	6.30033	1.5251	6.30033	0.8448
6.3085	23.0724	6.30833	6.96775	6.30867	1.53685	6.30867	0.8521
6.31683	22.3359	6.31667	6.9505	6.317	1.54785	6.317	0.85515
6.32517	21.6119	6.325	6.93645	6.32533	1.55945	6.32533	0.86115
6.3335	20.8955	6.33333	6.92905	6.33367	1.57315	6.33367	0.86635
6.34183	20.1938	6.34167	6.92175	6.342	1.58765	6.342	0.8717
6.35017	19.502	6.35	6.9144	6.35033	1.6026	6.35033	0.8766
6.3585	18.8335	6.35833	6.9109	6.35867	1.61575	6.35867	0.8805
6.36683	18.1806	6.36667	6.90865	6.367	1.62685	6.367	0.88575
6.37517	17.5526	6.375	6.9072	6.37533	1.638	6.37533	0.8884
6.3835	16.9537	6.38333	6.9101	6.38367	1.64935	6.38367	0.8924
6.39183	16.3761	6.39167	6.91255	6.392	1.65715	6.392	0.89475
6.40017	15.821	6.4	6.91645	6.40033	1.6642	6.40033	0.8969
6.4085	15.293	6.40833	6.9211	6.40867	1.6729	6.40867	0.8993
6.41683	14.7933	6.41667	6.92355	6.417	1.68325	6.417	0.90405
6.42517	14.3147	6.425	6.929	6.42533	1.6895	6.42533	0.90595
6.4335	13.8519	6.43333	6.93245	6.43367	1.6973	6.43367	0.9088
6.44183	13.415	6.44167	6.9369	6.442	1.70745	6.442	0.9146
6.45017	13	6.45	6.93775	6.45033	1.7183	6.45033	0.91855
6.4585	12.6057	6.45833	6.94005	6.45867	1.72905	6.45867	0.9236
6.46683	12.2355	6.46667	6.9386	6.467	1.73965	6.467	0.92795
6.47517	11.8821	6.475	6.9388	6.47533	1.754	6.47533	0.93135
6.4835	11.5446	6.48333	6.93545	6.48367	1.76965	6.48367	0.9382
6.49183	11.2228	6.49167	6.9315	6.492	1.7846	6.492	0.94295
6.50017	10.9099	6.5	6.9239	6.50033	1.8001	6.50033	0.94895
6.5085	10.6126	6.50833	6.91555	6.50867	1.8192	6.50867	0.957
6.51683	10.3258	6.51667	6.9043	6.517	1.83895	6.517	0.9661
6.52517	10.0501	6.525	6.89365	6.52533	1.8584	6.52533	0.97245
6.5335	9.7819	6.53333	6.8758	6.53367	1.8817	6.53367	0.9804
6.54183	9.5225	6.54167	6.85655	6.542	1.9094	6.542	0.9919
6.55017	9.2728	6.55	6.83185	6.55033	1.9343	6.55033	1.00095
6.5585	9.02855	6.55833	6.80645	6.55867	1.96315	6.55867	1.0114
6.56683	8.7957	6.56667	6.7749	6.567	1.99275	6.567	1.02095
6.57517	8.56615	6.575	6.74025	6.57533	2.0267	6.57533	1.03275
6.5835	8.3488	6.58333	6.70225	6.58367	2.05945	6.58367	1.04645
6.59183	8.1339	6.59167	6.65875	6.592	2.0971	6.592	1.05915
6.60017	7.92965	6.6	6.6177	6.60033	2.1367	6.60033	1.07465
6.6085	7.73485	6.60833	6.56875	6.60867	2.1799	6.60867	1.0914
6.61683	7.54285	6.61667	6.51455	6.617	2.224	6.617	1.1076
6.62517	7.35755	6.625	6.4581	6.62533	2.2705	6.62533	1.12705
6.6335	7.1794	6.63333	6.3992	6.63367	2.3166	6.63367	1.14285
6.64183	7.01065	6.64167	6.3347	6.642	2.3688	6.642	1.1646
6.65017	6.84695	6.65	6.27135	6.65033	2.4183	6.65033	1.18495
6.6585	6.68945	6.65833	6.2025	6.65867	2.4751	6.65867	1.2042
6.66683	6.5413	6.66667	6.13	6.667	2.52955	6.667	1.22735
6.67517	6.39515	6.675	6.05295	6.67533	2.5872	6.67533	1.2516
6.6835	6.2544	6.68333	5.9768	6.68367	2.6475	6.68367	1.2778
6.69183	6.1204	6.69167	5.8943	6.692	2.7112	6.692	1.3036
6.70017	5.991	6.7	5.81455	6.70033	2.77545	6.70033	1.33455
6.7085	5.869	6.70833	5.7309	6.70867	2.84535	6.70867	1.36645
6.71683	5.74355	6.71667	5.64845	6.717	2.918	6.717	1.40275
6.72517	5.6293	6.725	5.5562	6.72533	2.99575	6.72533	1.43795
6.7335	5.51855	6.73333	5.47125	6.73367	3.0792	6.73367	1.48375
6.74183	5.41235	6.74167	5.38105	6.742	3.16005	6.742	1.5236
6.75017	5.311	6.75	5.29355	6.75033	3.24925	6.75033	1.57095
6.7585	5.21455	6.75833	5.2056	6.75867	3.3418	6.75867	1.61845
6.76683	5.12105	6.76667	5.11635	6.767	3.4398	6.767	1.6708
6.77517	5.03385	6.775	5.0305	6.77533	3.5384	6.77533	1.72345
6.7835	4.95425	6.78333	4.94495	6.78367	3.64925	6.78367	1.7802
6.79183	4.8755	6.79167	4.8622	6.792	3.76015	6.792	1.84025
6.80017	4.8043	6.8	4.7849	6.80033	3.87895	6.80033	1.90365
6.8085	4.72965	6.80833	4.7147	6.80867	4.0008	6.80867	1.9679
6.81683	4.6615	6.81667	4.651	6.817	4.131	6.817	2.0362
6.82517	4.59215	6.825	4.59505	6.82533	4.268	6.82533	2.10815
6.8335	4.5246	6.83333	4.55335	6.83367	4.4137	6.83367	2.1837
6.84183	4.45635	6.84167	4.51915	6.842	4.56455	6.842	2.26205
6.85017	4.39005	6.85	4.4884	6.85033	4.7204	6.85033	2.3413
6.8585	4.3223	6.85833	4.4528	6.85867	4.8866	6.85867	2.42445
6.86683	4.2548	6.86667	4.41055	6.867	5.05915	6.867	2.51365
6.87517	4.1858	6.875	4.35225	6.87533	5.23985	6.87533	2.6072
6.8835	4.1193	6.88333	4.27885	6.88367	5.4343	6.88367	2.7105
6.89183	4.0529	6.89167	4.1909	6.892	5.64265	6.892	2.8294
6.90017	3.9911	6.9	4.09385	6.90033	5.87335	6.90033	2.979
6.9085	3.9256	6.90833	3.9882	6.90867	6.143	6.90867	3.18105
6.91683	3.8651	6.91667	3.88065	6.917	6.47485	6.917	3.48495
6.92517	3.80395	6.925	3.77595	6.92533	6.90815	6.92533	3.968
6.9335	3.74615	6.93333	3.6746	6.93367	7.50485	6.93367	4.74275
6.94183	3.68895	6.94167	3.581	6.942	8.3621	6.942	5.96155
6.95017	3.63395	6.95	3.49205	6.95033	9.5863	6.95033	7.78085
6.9585	3.57815	6.95833	3.411	6.95867	11.2775	6.95867	10.3253
6.96683	3.52525	6.96667	3.33405	6.967	13.5152	6.967	13.6466
6.97517	3.47415	6.975	3.26065	6.97533	16.3208	6.97533	17.6709
6.9835	3.42815	6.98333	3.19275	6.98367	19.6147	6.98367	22.1897
6.99183	3.37935	6.99167	3.1294	6.992	23.2472	6.992	26.9384
7.00017	3.334	7	3.0684	7.00033	27.0162	7.00033	31.5943
7.0085	3.28925	7.00833	3.0091	7.00867	30.6908	7.00867	35.8719
7.01683	3.2467	7.01667	2.95525	7.017	34.0737	7.017	39.5576
7.02517	3.20605	7.025	2.90645	7.02533	37.0139	7.02533	42.5528
7.0335	3.1647	7.03333	2.8519	7.03367	39.4412	7.03367	44.7995
7.04183	3.1272	7.04167	2.8007	7.042	41.3255	7.042	46.3647
7.05017	3.09245	7.05	2.75485	7.05033	42.6977	7.05033	47.3372
7.0585	3.0565	7.05833	2.70945	7.05867	43.6084	7.05867	47.8376
7.06683	3.0198	7.06667	2.6656	7.067	44.1305	7.067	47.9697
7.07517	2.98655	7.075	2.6249	7.07533	44.3103	7.07533	47.8344
7.0835	2.95585	7.08333	2.5819	7.08367	44.2089	7.08367	47.5043
7.09183	2.9285	7.09167	2.5432	7.092	43.8581	7.092	47.0525
7.10017	2.8972	7.1	2.50345	7.10033	43.3334	7.10033	46.5102
7.1085	2.87225	7.10833	2.46325	7.10867	42.6411	7.10867	45.928
7.11683	2.8461	7.11667	2.42695	7.117	41.7772	7.117	45.309
7.12517	2.82105	7.125	2.39075	7.12533	40.8072	7.12533	44.6708
7.1335	2.79545	7.13333	2.35595	7.13367	39.7569	7.13367	44.0237
7.14183	2.77075	7.14167	2.32005	7.142	38.6292	7.142	43.3757
7.15017	2.7439	7.15	2.29045	7.15033	37.4534	7.15033	42.7249
7.1585	2.7168	7.15833	2.2582	7.15867	36.2503	7.15867	42.0573
7.16683	2.6897	7.16667	2.2249	7.167	35.0243	7.167	41.3457
7.17517	2.66205	7.175	2.1947	7.17533	33.7754	7.17533	40.6247
7.1835	2.6333	7.18333	2.16285	7.18367	32.5316	7.18367	39.8965
7.19183	2.60305	7.19167	2.1328	7.192	31.3003	7.192	39.1518
7.20017	2.5744	7.2	2.1045	7.20033	30.0917	7.20033	38.398
7.2085	2.54475	7.20833	2.0773	7.20867	28.9124	7.20867	37.6352
7.21683	2.51615	7.21667	2.0499	7.217	27.7714	7.217	36.8633
7.22517	2.488	7.225	2.02515	7.22533	26.6711	7.22533	36.0731
7.2335	2.46075	7.23333	1.99775	7.23367	25.6135	7.23367	35.2856
7.24183	2.43485	7.24167	1.9737	7.242	24.6025	7.242	34.4967
7.25017	2.40925	7.25	1.9474	7.25033	23.6521	7.25033	33.7307
7.2585	2.38185	7.25833	1.92545	7.25867	22.762	7.25867	32.9862
7.26683	2.36	7.26667	1.90385	7.267	21.9386	7.267	32.2839
7.27517	2.3347	7.275	1.87995	7.27533	21.196	7.27533	31.6245
7.2835	2.3116	7.28333	1.8577	7.28367	20.5353	7.28367	31.0233
7.29183	2.29065	7.29167	1.83515	7.292	19.9616	7.292	30.4761
7.30017	2.26855	7.3	1.81505	7.30033	19.4396	7.30033	29.9726
7.3085	2.24685	7.30833	1.79465	7.30867	18.9597	7.30867	29.4917
7.31683	2.227	7.31667	1.77495	7.317	18.5083	7.317	29.0144
7.32517	2.20445	7.325	1.7534	7.32533	18.0471	7.32533	28.5212
7.3335	2.1851	7.33333	1.7346	7.33367	17.5548	7.33367	28.5144
7.34183	2.1657	7.34167	1.71595	7.342	17.0212	7.342	27.4282
7.35017	2.1463	7.35	1.6979	7.35033	16.4377	7.35033	26.8109
7.3585	2.12915	7.35833	1.67975	7.35867	15.808	7.35867	26.1551
7.36683	2.1122	7.36667	1.6641	7.367	15.1432	7.367	25.4799
7.37517	2.09455	7.375	1.6466	7.37533	14.4726	7.37533	24.8103
7.3835	2.07665	7.38333	1.6318	7.38367	13.8018	7.38367	24.1482
7.39183	2.05855	7.39167	1.618	7.392	13.1514	7.392	23.5167
7.40017	2.04145	7.4	1.6017	7.40033	12.5258	7.40033	22.9148
7.4085	2.0257	7.40833	1.58605	7.40867	11.9337	7.40867	22.3439
7.41683	2.0086	7.41667	1.57145	7.417	11.373	7.417	21.8016
7.42517	1.999	7.425	1.5581	7.42533	10.8481	7.42533	21.2973
7.4335	1.9798	7.43333	1.5432	7.43367	10.3531	7.43367	20.8195
7.44183	1.9647	7.44167	1.5287	7.442	9.89115	7.442	20.3758
7.45017	1.9512	7.45	1.51535	7.45033	9.45985	7.45033	19.9544
7.4585	1.9359	7.45833	1.50195	7.45867	9.05195	7.45867	19.5583
7.46683	1.921	7.46667	1.48765	7.467	8.67035	7.467	19.1836
7.47517	1.9082	7.475	1.47315	7.47533	8.31095	7.47533	18.8246
7.4835	1.89725	7.48333	1.46115	7.48367	7.971	7.48367	18.483
7.49183	1.88285	7.49167	1.44915	7.492	7.64555	7.492	18.1568
7.50017	1.8671	7.5	1.4357	7.50033	7.34115	7.50033	17.8419
7.5085	1.8568	7.50833	1.4251	7.50867	7.0515	7.50867	17.5422
7.51683	1.8454	7.51667	1.41185	7.517	6.7776	7.517	17.2542
7.52517	1.8307	7.525	1.4008	7.52533	6.5179	7.52533	16.9789
7.5335	1.81745	7.53333	1.39135	7.53367	6.2738	7.53367	16.7145
7.54183	1.80595	7.54167	1.37915	7.542	6.04355	7.542	16.4492
7.55017	1.79365	7.55	1.36835	7.55033	5.82015	7.55033	16.1945
7.5585	1.7821	7.55833	1.357	7.55867	5.6075	7.55867	15.9464
7.56683	1.76975	7.56667	1.3465	7.567	5.40475	7.567	15.7032
7.57517	1.76	7.575	1.33635	7.57533	5.20965	7.57533	15.4667
7.5835	1.7478	7.58333	1.326	7.58367	5.0255	7.58367	15.2378
7.59183	1.7345	7.59167	1.317	7.592	4.8474	7.592	15.0144
7.60017	1.7253	7.6	1.30875	7.60033	4.6765	7.60033	14.7891
7.6085	1.71315	7.60833	1.3012	7.60867	4.51615	7.60867	14.5677
7.61683	1.7047	7.61667	1.29135	7.617	4.3601	7.617	14.3476
7.62517	1.69405	7.625	1.2828	7.62533	4.211	7.62533	14.132
7.6335	1.68285	7.63333	1.2722	7.63367	4.07055	7.63367	13.9187
7.64183	1.67405	7.64167	1.2629	7.642	3.935	7.642	13.7092
7.65017	1.66355	7.65	1.2563	7.65033	3.80705	7.65033	13.5066
7.6585	1.6523	7.65833	1.2477	7.65867	3.6864	7.65867	13.3019
7.66683	1.6418	7.66667	1.24015	7.667	3.5705	7.667	13.1053
7.67517	1.6334	7.675	1.2316	7.67533	3.45925	7.67533	12.9065
7.6835	1.6225	7.68333	1.22135	7.68367	3.35405	7.68367	12.7157
7.69183	1.61095	7.69167	1.21415	7.692	3.25205	7.692	12.5219
7.70017	1.60365	7.7	1.20725	7.70033	3.1556	7.70033	12.3294
7.7085	1.5908	7.70833	1.1981	7.70867	3.0625	7.70867	12.1427
7.71683	1.58155	7.71667	1.19245	7.717	2.9733	7.717	11.9609
7.72517	1.57125	7.725	1.1844	7.72533	2.88735	7.72533	11.7729
7.7335	1.5624	7.73333	1.17655	7.73367	2.8046	7.73367	11.5833
7.74183	1.5534	7.74167	1.16905	7.742	2.72595	7.742	11.4008
7.75017	1.5437	7.75	1.16035	7.75033	2.6459	7.75033	11.2174
7.7585	1.53355	7.75833	1.15165	7.75867	2.5725	7.75867	11.0361
7.76683	1.5251	7.76667	1.14425	7.767	2.4999	7.767	10.859
7.77517	1.5161	7.775	1.13825	7.77533	2.4304	7.77533	10.685
7.7835	1.50775	7.78333	1.13275	7.78367	2.3646	7.78367	10.5093
7.79183	1.49855	7.79167	1.12655	7.792	2.3008	7.792	10.3339
7.80017	1.49295	7.8	1.12005	7.80033	2.2391	7.80033	10.1617
7.8085	1.48585	7.80833	1.11785	7.80867	2.18135	7.80867	9.99155
7.81683	1.4788	7.81667	1.11245	7.817	2.12555	7.817	9.82115
7.82517	1.4696	7.825	1.10935	7.82533	2.0695	7.82533	9.65215
7.8335	1.4631	7.83333	1.1069	7.83367	2.01525	7.83367	9.484
7.84183	1.4552	7.84167	1.1021	7.842	1.9609	7.842	9.31615
7.85017	1.4504	7.85	1.10005	7.85033	1.91235	7.85033	9.15215
7.8585	1.4442	7.85833	1.09435	7.85867	1.86125	7.85867	8.98895
7.86683	1.44095	7.86667	1.0879	7.867	1.80745	7.867	8.82
7.87517	1.4348	7.875	1.0836	7.87533	1.75765	7.87533	8.65845
7.8835	1.4364	7.88333	1.079	7.88367	1.71055	7.88367	8.4987
7.89183	1.43585	7.89167	1.0739	7.892	1.66055	7.892	8.3378
7.90017	1.44095	7.9	1.0768	7.90033	1.6134	7.90033	8.1829
7.9085	1.4518	7.90833	1.08525	7.90867	1.56785	7.90867	8.02725
7.91683	1.4684	7.91667	1.0942	7.917	1.52165	7.917	7.8709
7.92517	1.49845	7.925	1.09225	7.92533	1.47575	7.92533	7.71815
7.9335	1.53835	7.93333	1.08315	7.93367	1.42945	7.93367	7.56545
7.94183	1.58965	7.94167	1.05635	7.942	1.38735	7.942	7.41765
7.95017	1.65455	7.95	0.99985	7.95033	1.3491	7.95033	7.2729
7.9585	1.7297	7.95833	1.0976	7.95867	1.3093	7.95867	7.131
7.96683	1.81165	7.96667	1.84005	7.967	1.2789	7.967	6.99375
7.97517	1.89485	7.975	3.0338	7.97533	1.2516	7.97533	6.8597
7.9835	1.97315	7.98333	4.1818	7.98367	1.22775	7.98367	6.72725
7.99183	2.04075	7.99167	5.08745	7.992	1.2035	7.992	6.5947
8.00017	2.08925	8	5.7625	8.00033	1.184	8.00033	6.46835
8.0085	2.11975	8.00833	6.2636	8.00867	1.1617	8.00867	6.3361
8.01683	2.1301	8.01667	6.6492	8.017	1.13925	8.017	6.20865
8.02517	2.12385	8.025	7.01405	8.02533	1.11685	8.02533	6.0821
8.0335	2.10245	8.03333	7.366	8.03367	1.0943	8.03367	5.95365
8.04183	2.06705	8.04167	7.6475	8.042	1.0727	8.042	5.82805
8.05017	2.0196	8.05	7.84055	8.05033	1.0486	8.05033	5.7044
8.0585	1.9629	8.05833	7.9702	8.05867	1.02395	8.05867	5.57725
8.06683	1.9028	8.06667	8.05485	8.067	1.0035	8.067	5.45425
8.07517	1.8382	8.075	8.115	8.07533	0.9846	8.07533	5.33555
8.0835	1.76905	8.08333	8.15705	8.08367	0.9652	8.08367	5.21685
8.09183	1.70065	8.09167	8.18865	8.092	0.9491	8.092	5.10385
8.10017	1.6324	8.1	8.21115	8.10033	0.935	8.10033	4.9884
8.1085	1.56935	8.10833	8.22575	8.10867	0.92085	8.10867	4.8754
8.11683	1.5128	8.11667	8.2357	8.117	0.90855	8.117	4.76495
8.12517	1.4582	8.125	8.2394	8.12533	0.89715	8.12533	4.65675
8.1335	1.4128	8.13333	8.2409	8.13367	0.88365	8.13367	4.5473
8.14183	1.37545	8.14167	8.23755	8.142	0.8688	8.142	4.4421
8.15017	1.344	8.15	8.23505	8.15033	0.85525	8.15033	4.33635
8.1585	1.3171	8.15833	8.22615	8.15867	0.83935	8.15867	4.23285
8.16683	1.2981	8.16667	8.2188	8.167	0.82205	8.167	4.13195
8.17517	1.28095	8.175	8.20625	8.17533	0.80225	8.17533	4.02995
8.1835	1.26775	8.18333	8.1919	8.18367	0.78415	8.18367	3.9302
8.19183	1.2546	8.19167	8.17605	8.192	0.76505	8.192	3.83235
8.20017	1.2459	8.2	8.16185	8.20033	0.75235	8.20033	3.7375
8.2085	1.23705	8.20833	8.14355	8.20867	0.74235	8.20867	3.64575
8.21683	1.23075	8.21667	8.12335	8.217	0.74275	8.217	3.5573
8.22517	1.22205	8.225	8.1042	8.22533	0.7571	8.22533	3.4766
8.2335	1.21495	8.23333	8.0849	8.23367	0.78895	8.23367	3.40435
8.24183	1.20825	8.24167	8.05905	8.242	0.84365	8.242	3.3359
8.25017	1.20375	8.25	8.0387	8.25033	0.9195	8.25033	3.2725
8.2585	1.19605	8.25833	8.0126	8.25867	1.02085	8.25867	3.21985
8.26683	1.191	8.26667	7.98895	8.267	1.1431	8.267	3.1732
8.27517	1.1852	8.275	7.9614	8.27533	1.2782	8.27533	3.1286
8.2835	1.17975	8.28333	7.9373	8.28367	1.4182	8.28367	3.0871
8.29183	1.17295	8.29167	7.90785	8.292	1.547	8.292	3.03975
8.30017	1.16795	8.3	7.88025	8.30033	1.65385	8.30033	2.99205
8.3085	1.1633	8.30833	7.8532	8.30867	1.7303	8.30867	2.93445
8.31683	1.1562	8.31667	7.8251	8.317	1.7671	8.317	2.87075
8.32517	1.1512	8.325	7.7934	8.32533	1.7651	8.32533	2.8009
8.3335	1.14395	8.33333	7.76375	8.33367	1.7225	8.33367	2.7222
8.34183	1.13825	8.34167	7.73365	8.342	1.64975	8.342	2.63695
8.35017	1.1332	8.35	7.7023	8.35033	1.5525	8.35033	2.54835
8.3585	1.12955	8.35833	7.6702	8.35867	1.44	8.35867	2.4556
8.36683	1.12565	8.36667	7.64035	8.367	1.3223	8.367	2.3679
8.37517	1.11865	8.375	7.65105	8.37533	1.20505	8.37533	2.279
8.3835	1.11435	8.38333	7.5657	8.38367	1.0912	8.38367	2.19485
8.39183	1.11	8.39167	7.45135	8.392	0.9847	8.392	2.114
8.40017	1.10725	8.4	7.4821	8.40033	0.8912	8.40033	2.03625
8.4085	1.1044	8.40833	7.47095	8.40867	0.8057	8.40867	1.9613
8.41683	1.1013	8.41667	7.4375	8.417	0.7332	8.417	1.8936
8.42517	1.09715	8.425	7.4014	8.42533	0.67005	8.42533	1.82585
8.4335	1.0912	8.43333	7.3651	8.43367	0.61415	8.43367	1.7631
8.44183	1.0905	8.44167	7.3288	8.442	0.5672	8.442	1.7016
8.45017	1.08745	8.45	7.2936	8.45033	0.5268	8.45033	1.642
8.4585	1.08275	8.45833	7.2554	8.45867	0.49195	8.45867	1.58745
8.46683	1.07815	8.46667	7.21875	8.467	0.4651	8.467	1.5345
8.47517	1.0764	8.475	7.1814	8.47533	0.43965	8.47533	1.4837
8.4835	1.07215	8.48333	7.14045	8.48367	0.41575	8.48367	1.4334
8.49183	1.0713	8.49167	7.1069	8.492	0.39875	8.492	1.38735
8.50017	1.06525	8.5	7.068	8.50033	0.38125	8.50033	1.33995
8.5085	1.06345	8.50833	7.03085	8.50867	0.36625	8.50867	1.2946
8.51683	1.0606	8.51667	6.99	8.517	0.35375	8.517	1.2518
8.52517	1.05985	8.525	6.95045	8.52533	0.34215	8.52533	1.2102
8.5335	1.0589	8.53333	6.91065	8.53367	0.3319	8.53367	1.1675
8.54183	1.05605	8.54167	6.87055	8.542	0.32035	8.542	1.12435
8.55017	1.054	8.55	6.8301	8.55033	0.3117	8.55033	1.08435
8.5585	1.05345	8.55833	6.7874	8.55867	0.30185	8.55867	1.0453
8.56683	1.05065	8.56667	6.7456	8.567	0.29315	8.567	1.00735
8.57517	1.0508	8.575	6.7035	8.57533	0.28655	8.57533	0.97055
8.5835	1.04945	8.58333	6.66295	8.58367	0.2796	8.58367	0.9333
8.59183	1.0483	8.59167	6.61845	8.592	0.2706	8.592	0.8973
8.60017	1.0476	8.6	6.5773	8.60033	0.26785	8.60033	0.8662
8.6085	1.04485	8.60833	6.5307	8.60867	0.2602	8.60867	0.8334
8.61683	1.04465	8.61667	6.4858	8.617	0.25445	8.617	0.80135
8.62517	1.0404	8.625	6.4408	8.62533	0.2485	8.62533	0.768
8.6335	1.0378	8.63333	6.3929	8.63367	0.24305	8.63367	0.73965
8.64183	1.0357	8.64167	6.34475	8.642	0.23775	8.642	0.71165
8.65017	1.0597	8.65	6.29765	8.65033	0.23145	8.65033	0.68085
8.6585	1.0475	8.65833	6.25015	8.65867	0.2303	8.65867	0.65255
8.66683	0.9059	8.66667	6.19965	8.667	0.22655	8.667	0.62695
8.67517	1.0132	8.675	6.14885	8.67533	0.2219	8.67533	0.6014
8.6835	1.04105	8.68333	6.0983	8.68367	0.2192	8.68367	0.5768
8.69183	1.0286	8.69167	6.04575	8.692	0.21635	8.692	0.5539
8.70017	1.01305	8.7	5.9906	8.70033	0.2158	8.70033	0.5309
8.7085	1.00985	8.70833	5.93465	8.70867	0.21435	8.70867	0.5073
8.71683	1.0023	8.71667	5.88015	8.717	0.2117	8.717	0.48545
8.72517	0.99815	8.725	5.8241	8.72533	0.21045	8.72533	0.4628
8.7335	0.99315	8.73333	5.7664	8.73367	0.2124	8.73367	0.4435
8.74183	0.9909	8.74167	5.70665	8.742	0.207	8.742	0.41965
8.75017	0.98675	8.75	5.6459	8.75033	0.2048	8.75033	0.3987
8.7585	0.98415	8.75833	5.5848	8.75867	0.202	8.75867	0.37605
8.76683	0.9789	8.76667	5.5243	8.767	0.1985	8.767	0.35545
8.77517	0.9767	8.775	5.4633	8.77533	0.19345	8.77533	0.3336
8.7835	0.9725	8.78333	5.39995	8.78367	0.18795	8.78367	0.31085
8.79183	0.97115	8.79167	5.33885	8.792	0.183	8.792	0.2913
8.80017	0.96775	8.8	5.275	8.80033	0.17805	8.80033	0.26915
8.8085	0.96515	8.80833	5.2148	8.80867	0.172	8.80867	0.24895
8.81683	0.9614	8.81667	5.1491	8.817	0.1668	8.817	0.2281
8.82517	0.95855	8.825	5.08435	8.82533	0.16185	8.82533	0.2081
8.8335	0.9574	8.83333	5.0188	8.83367	0.1578	8.83367	0.192
8.84183	0.95445	8.84167	4.95385	8.842	0.1534	8.842	0.17345
8.85017	0.95145	8.85	4.88535	8.85033	0.1511	8.85033	0.1572
8.8585	0.95	8.85833	4.8209	8.85867	0.1471	8.85867	0.14085
8.86683	0.94835	8.86667	4.7567	8.867	0.1438	8.867	0.1268
8.87517	0.9463	8.875	4.6992	8.87533	0.1399	8.87533	0.1098
8.8835	0.9421	8.88333	4.6671	8.88367	0.1375	8.88367	0.0959
8.89183	0.94285	8.89167	4.5481	8.892	0.13395	8.892	0.08095
8.90017	0.94	8.9	4.3597	8.90033	0.1308	8.90033	0.06465
8.9085	0.9371	8.90833	4.42475	8.90867	0.12875	8.90867	0.0508
8.91683	0.9366	8.91667	4.35435	8.917	0.12685	8.917	0.0375
8.92517	0.9354	8.925	4.2773	8.92533	0.12615	8.92533	0.02505
8.9335	0.93385	8.93333	4.20485	8.93367	0.12035	8.93367	0.0093
8.94183	0.931	8.94167	4.1334	8.942	0.11865	8.942	-0.0035
8.95017	0.9304	8.95	4.06415	8.95033	0.1184	8.95033	-0.01595
8.9585	0.92965	8.95833	3.99295	8.95867	0.11735	8.95867	-0.0273
8.96683	0.929	8.96667	3.92275	8.967	0.11525	8.967	-0.03875
8.97517	0.92635	8.975	3.8501	8.97533	0.1146	8.97533	-0.04905
8.9835	0.9262	8.98333	3.77845	8.98367	0.11375	8.98367	-0.05735
8.99183	0.9249	8.99167	3.70785	8.992	0.1132	8.992	-0.0674
9.00017	0.92405	9	3.6363	9.00033	0.111	9.00033	-0.0794
9.0085	0.92405	9.00833	3.5634	9.00867	0.1119	9.00867	-0.0865
9.01683	0.92115	9.01667	3.49405	9.017	0.11025	9.017	-0.09515
9.02517	0.9211	9.025	3.4223	9.02533	0.1096	9.02533	-0.10445
9.0335	0.9182	9.03333	3.3524	9.03367	0.1077	9.03367	-0.1141
9.04183	0.91915	9.04167	3.2806	9.042	0.10785	9.042	-0.1223
9.05017	0.9205	9.05	3.21255	9.05033	0.10765	9.05033	-0.1298
9.0585	0.92105	9.05833	3.14035	9.05867	0.1043	9.05867	-0.1386
9.06683	0.9197	9.06667	3.07005	9.067	0.1033	9.067	-0.1468
9.07517	0.92105	9.075	3.0004	9.07533	0.10125	9.07533	-0.15455
9.0835	0.927	9.08333	2.9316	9.08367	0.10165	9.08367	-0.16165
9.09183	0.9382	9.09167	2.865	9.092	0.0982	9.092	-0.16895
9.10017	0.9514	9.1	2.79665	9.10033	0.0993	9.10033	-0.1765
9.1085	0.95235	9.10833	2.73125	9.10867	0.097	9.10867	-0.1843
9.11683	0.95475	9.11667	2.66655	9.117	0.0966	9.117	-0.19035
9.12517	0.9525	9.125	2.60335	9.12533	0.0953	9.12533	-0.1971
9.1335	0.9482	9.13333	2.54065	9.13367	0.09715	9.13367	-0.20215
9.14183	0.9395	9.14167	2.4785	9.142	0.0959	9.142	-0.20725
9.15017	0.9268	9.15	2.41825	9.15033	0.09675	9.15033	-0.2139
9.1585	0.9139	9.15833	2.3583	9.15867	0.1005	9.15867	-0.21325
9.16683	0.89965	9.16667	2.29855	9.167	0.1058	9.167	-0.2145
9.17517	0.8853	9.175	2.24095	9.17533	0.11325	9.17533	-0.21205
9.1835	0.87385	9.18333	2.1849	9.18367	0.12935	9.18367	-0.20535
9.19183	0.86205	9.19167	2.12945	9.192	0.15235	9.192	-0.19385
9.20017	0.8361	9.2	2.0737	9.20033	0.1916	9.20033	-0.1697
9.2085	0.77705	9.20833	2.02135	9.20867	0.2501	9.20867	-0.13435
9.21683	1.07965	9.21667	1.9698	9.217	0.3378	9.217	-0.0812
9.22517	2.2988	9.225	1.9193	9.22533	0.46445	9.22533	-0.00255
9.2335	4.0441	9.23333	1.87005	9.23367	0.63565	9.23367	0.1044
9.24183	5.67975	9.24167	1.82445	9.242	0.8628	9.242	0.24475
9.25017	6.95785	9.25	1.77735	9.25033	1.14375	9.25033	0.4139
9.2585	7.88195	9.25833	1.73285	9.25867	1.4777	9.25867	0.6117
9.26683	8.54475	9.26667	1.6896	9.267	1.8463	9.267	0.8272
9.27517	9.03	9.275	1.6493	9.27533	2.2342	9.27533	1.0496
9.2835	9.40295	9.28333	1.6072	9.28367	2.60715	9.28367	1.25885
9.29183	9.7036	9.29167	1.56745	9.292	2.9317	9.292	1.436
9.30017	9.95925	9.3	1.53115	9.30033	3.1844	9.30033	1.56755
9.3085	10.2088	9.30833	1.4923	9.30867	3.3427	9.30867	1.64065
9.31683	10.4555	9.31667	1.45625	9.317	3.393	9.317	1.6491
9.32517	10.6714	9.325	1.42435	9.32533	3.33785	9.32533	1.5959
9.3335	10.8392	9.33333	1.39	9.33367	3.19025	9.33367	1.4925
9.34183	10.9624	9.34167	1.36075	9.342	2.9655	9.342	1.3426
9.35017	11.0523	9.35	1.3304	9.35033	2.68955	9.35033	1.1686
9.3585	11.1182	9.35833	1.30145	9.35867	2.38435	9.35867	0.9827
9.36683	11.1665	9.36667	1.27255	9.367	2.07045	9.367	0.79195
9.37517	11.2052	9.375	1.2487	9.37533	1.7657	9.37533	0.6101
9.3835	11.2357	9.38333	1.22325	9.38367	1.4815	9.38367	0.44485
9.39183	11.2608	9.39167	1.19815	9.392	1.2247	9.392	0.29635
9.40017	11.2799	9.4	1.17275	9.40033	1.0023	9.40033	0.167
9.4085	11.2954	9.40833	1.149	9.40867	0.81345	9.40867	0.0592
9.41683	11.3092	9.41667	1.12755	9.417	0.6567	9.417	-0.02785
9.42517	11.3185	9.425	1.10705	9.42533	0.5299	9.42533	-0.0976
9.4335	11.3273	9.43333	1.08535	9.43367	0.42785	9.43367	-0.15505
9.44183	11.3318	9.44167	1.065	9.442	0.3492	9.442	-0.1961
9.45017	11.3353	9.45	1.04785	9.45033	0.2876	9.45033	-0.22805
9.4585	11.3385	9.45833	1.0289	9.45867	0.24265	9.45867	-0.2508
9.46683	11.337	9.46667	1.01305	9.467	0.20725	9.467	-0.2686
9.47517	11.3362	9.475	0.9948	9.47533	0.18155	9.47533	-0.2807
9.4835	11.3345	9.48333	0.9779	9.48367	0.16235	9.48367	-0.2894
9.49183	11.3325	9.49167	0.9619	9.492	0.14675	9.492	-0.2977
9.50017	11.3274	9.5	0.9505	9.50033	0.13675	9.50033	-0.30225
9.5085	11.3213	9.50833	0.9367	9.50867	0.1296	9.50867	-0.30595
9.51683	11.3162	9.51667	0.92245	9.517	0.12505	9.517	-0.31005
9.52517	11.3118	9.525	0.90925	9.52533	0.12305	9.52533	-0.3139
9.5335	11.3038	9.53333	0.8956	9.53367	0.1267	9.53367	-0.3155
9.54183	11.295	9.54167	0.8849	9.542	0.1293	9.542	-0.31385
9.55017	11.2896	9.55	0.87075	9.55033	0.1328	9.55033	-0.3177
9.5585	11.2804	9.55833	0.8605	9.55867	0.13885	9.55867	-0.3202
9.56683	11.2704	9.56667	0.8503	9.567	0.14765	9.567	-0.3172
9.57517	11.2613	9.575	0.84005	9.57533	0.1529	9.57533	-0.3187
9.5835	11.2526	9.58333	0.8291	9.58367	0.1592	9.58367	-0.319
9.59183	11.2432	9.59167	0.81955	9.592	0.16175	9.592	-0.3227
9.60017	11.2299	9.6	0.81245	9.60033	0.1665	9.60033	-0.32155
9.6085	11.2196	9.60833	0.8019	9.60867	0.16885	9.60867	-0.31955
9.61683	11.2071	9.61667	0.79145	9.617	0.1696	9.617	-0.32045
9.62517	11.1948	9.625	0.7825	9.62533	0.16935	9.62533	-0.3198
9.6335	11.1804	9.63333	0.77745	9.63367	0.16505	9.63367	-0.3214
9.64183	11.1686	9.64167	0.7667	9.642	0.16285	9.642	-0.32045
9.65017	11.1529	9.65	0.7608	9.65033	0.1598	9.65033	-0.321
9.6585	11.1389	9.65833	0.75235	9.65867	0.1539	9.65867	-0.3211
9.66683	11.1235	9.66667	0.7473	9.667	0.1498	9.667	-0.3204
9.67517	11.1087	9.675	0.7415	9.67533	0.14545	9.67533	-0.32115
9.6835	11.0938	9.68333	0.7344	9.68367	0.1408	9.68367	-0.321
9.69183	11.0775	9.69167	0.7276	9.692	0.1379	9.692	-0.32075
9.70017	11.0616	9.7	0.7222	9.70033	0.13335	9.70033	-0.32035
9.7085	11.0436	9.70833	0.7174	9.70867	0.1309	9.70867	-0.3186
9.71683	11.0281	9.71667	0.70985	9.717	0.1278	9.717	-0.3207
9.72517	11.0088	9.725	0.70585	9.72533	0.12515	9.72533	-0.31925
9.7335	10.9929	9.73333	0.69975	9.73367	0.1268	9.73367	-0.31545
9.74183	10.9723	9.74167	0.69345	9.742	0.1251	9.742	-0.3157
9.75017	10.9555	9.75	0.69265	9.75033	0.12455	9.75033	-0.3152
9.7585	10.9354	9.75833	0.68555	9.75867	0.12525	9.75867	-0.3145
9.76683	10.9157	9.76667	0.6795	9.767	0.1251	9.767	-0.31275
9.77517	10.8942	9.775	0.6767	9.77533	0.12765	9.77533	-0.31165
9.7835	10.8751	9.78333	0.6746	9.78367	0.1297	9.78367	-0.30915
9.79183	10.8534	9.79167	0.6701	9.792	0.1306	9.792	-0.31005
9.80017	10.8328	9.8	0.66645	9.80033	0.1313	9.80033	-0.30955
9.8085	10.811	9.80833	0.66245	9.80867	0.13415	9.80867	-0.3077
9.81683	10.7902	9.81667	0.65975	9.817	0.13665	9.817	-0.3086
9.82517	10.7668	9.825	0.65525	9.82533	0.139	9.82533	-0.30995
9.8335	10.7469	9.83333	0.6517	9.83367	0.1438	9.83367	-0.3134
9.84183	10.7208	9.84167	0.6522	9.842	0.14975	9.842	-0.3134
9.85017	10.6984	9.85	0.64715	9.85033	0.1564	9.85033	-0.3156
9.8585	10.676	9.85833	0.6468	9.85867	0.16685	9.85867	-0.3179
9.86683	10.6535	9.86667	0.6424	9.867	0.17825	9.867	-0.32
9.87517	10.6292	9.875	0.64085	9.87533	0.19245	9.87533	-0.32145
9.8835	10.606	9.88333	0.64065	9.88367	0.20705	9.88367	-0.3207
9.89183	10.5823	9.89167	0.63735	9.892	0.2218	9.892	-0.3206
9.90017	10.5596	9.9	0.6352	9.90033	0.2359	9.90033	-0.3211
9.9085	10.5332	9.90833	0.6344	9.90867	0.2484	9.90867	-0.32185
9.91683	10.5085	9.91667	0.6335	9.917	0.25755	9.917	-0.3179
9.92517	10.4843	9.925	0.63435	9.92533	0.26355	9.92533	-0.31575
9.9335	10.458	9.93333	0.63265	9.93367	0.2639	9.93367	-0.31555
9.94183	10.4342	9.94167	0.6324	9.942	0.261	9.942	-0.3128
9.95017	10.4056	9.95	0.63145	9.95033	0.25605	9.95033	-0.3104
9.9585	10.3779	9.95833	0.633	9.95867	0.2479	9.95867	-0.3058
9.96683	10.353	9.96667	0.63395	9.967	0.2343	9.967	-0.3054
9.97517	10.3247	9.975	0.6343	9.97533	0.2239	9.97533	-0.30145
9.9835	10.2934	9.98333	0.6352	9.98367	0.2102	9.98367	-0.2996
9.99183	10.2827	9.99167	0.63505	9.992	0.2015	9.992	-0.2957
10.0002	10.2353	10	0.63605	10.0003	0.18925	10.0003	-0.2949
10.0085	10.2119	10.0083	0.6361	10.0087	0.17965	10.0087	-0.2934
10.0168	10.1814	10.0167	0.6356	10.017	0.17195	10.017	-0.28905
10.0252	10.1538	10.025	0.6375	10.0253	0.1631	10.0253	-0.2893
10.0335	10.1221	10.0333	0.6374	10.0337	0.15815	10.0337	-0.28945
10.0418	10.0908	10.0417	0.6365	10.042	0.15065	10.042	-0.2915
10.0502	10.0594	10.05	0.6363	10.0503	0.14775	10.0503	-0.28815
10.0585	10.0286	10.0583	0.63485	10.0587	0.14215	10.0587	-0.2893
10.0668	9.99575	10.0667	0.63565	10.067	0.1407	10.067	-0.2894
10.0752	9.9631	10.075	0.6362	10.0753	0.1386	10.0753	-0.29035
10.0835	9.92145	10.0833	0.63665	10.0837	0.1363	10.0837	-0.2899
10.0918	9.8966	10.0917	0.63665	10.092	0.1323	10.092	-0.2921
10.1002	9.8609	10.1	0.6368	10.1003	0.1308	10.1003	-0.2927
10.1085	9.8252	10.1083	0.63705	10.1087	0.1292	10.1087	-0.29
10.1168	9.8017	10.1167	0.6386	10.117	0.12935	10.117	-0.28885
10.1252	9.74355	10.125	0.64075	10.1253	0.12955	10.1253	-0.29065
10.1335	9.69325	10.1333	0.6417	10.1337	0.127	10.1337	-0.2902
10.1418	9.79765	10.1417	0.64725	10.142	0.12675	10.142	-0.2884
10.1502	9.54345	10.15	0.64985	10.1503	0.1255	10.1503	-0.28885
10.1585	9.60095	10.1583	0.6553	10.1587	0.1262	10.1587	-0.2887
10.1668	9.5653	10.1667	0.6597	10.167	0.12595	10.167	-0.28495
10.1752	9.51265	10.175	0.6698	10.1753	0.12625	10.1753	-0.28425
10.1835	9.46695	10.1833	0.67685	10.1837	0.12535	10.1837	-0.28245
10.1918	9.42415	10.1917	0.6855	10.192	0.12885	10.192	-0.2774
10.2002	9.37785	10.2	0.69555	10.2003	0.1267	10.2003	-0.2778
10.2085	9.33005	10.2083	0.70865	10.2087	0.12645	10.2087	-0.2762
10.2168	9.2831	10.2167	0.721	10.217	0.1269	10.217	-0.27445
10.2252	9.2335	10.225	0.73505	10.2253	0.1282	10.2253	-0.27355
10.2335	9.18215	10.2333	0.74795	10.2337	0.12845	10.2337	-0.2712
10.2418	9.13205	10.2417	0.76555	10.242	0.1301	10.242	-0.2683
10.2502	9.07825	10.25	0.78295	10.2503	0.1314	10.2503	-0.26675
10.2585	9.022	10.2583	0.7979	10.2587	0.13425	10.2587	-0.26205
10.2668	8.97	10.2667	0.81495	10.267	0.13315	10.267	-0.26115
10.2752	8.91205	10.275	0.83375	10.2753	0.13565	10.2753	-0.2582
10.2835	8.85335	10.2833	0.852201	10.2837	0.1365	10.2837	-0.25495
10.2918	8.79625	10.2917	0.869651	10.292	0.1381	10.292	-0.2514
10.3002	8.73585	10.3	0.885401	10.3003	0.1399	10.3003	-0.24655
10.3085	8.67615	10.3083	0.900851	10.3087	0.13995	10.3087	-0.24475
10.3168	8.6135	10.3167	0.919651	10.317	0.1429	10.317	-0.2412
10.3252	8.5476	10.325	0.934851	10.3253	0.14555	10.3253	-0.24015
10.3335	8.48435	10.3333	0.949451	10.3337	0.14775	10.3337	-0.2381
10.3418	8.41995	10.3417	0.961551	10.342	0.1524	10.342	-0.238
10.3502	8.34965	10.35	0.975051	10.3503	0.15785	10.3503	-0.2366
10.3585	8.28415	10.3583	0.987501	10.3587	0.162	10.3587	-0.2355
10.3668	8.21355	10.3667	0.999701	10.367	0.1713	10.367	-0.23295
10.3752	8.1446	10.375	1.00785	10.3753	0.1826	10.3753	-0.23185
10.3835	8.07325	10.3833	1.02045	10.3837	0.19335	10.3837	-0.2314
10.3918	7.99965	10.3917	1.0279	10.392	0.2089	10.392	-0.22795
10.4002	7.92535	10.4	1.035	10.4003	0.2238	10.4003	-0.22595
10.4085	7.85215	10.4083	1.04235	10.4087	0.2374	10.4087	-0.22755
10.4168	7.7754	10.4167	1.048	10.417	0.25085	10.417	-0.22495
10.4252	7.7012	10.425	1.056	10.4253	0.26445	10.4253	-0.22215
10.4335	7.62135	10.4333	1.0609	10.4337	0.26975	10.4337	-0.22085
10.4418	7.54165	10.4417	1.0652	10.442	0.27765	10.442	-0.21805
10.4502	7.46075	10.45	1.06755	10.4503	0.2762	10.4503	-0.215
10.4585	7.38205	10.4583	1.0684	10.4587	0.27335	10.4587	-0.2166
10.4668	7.29675	10.4667	1.07325	10.467	0.26695	10.467	-0.2142
10.4752	7.21395	10.475	1.07405	10.4753	0.25765	10.4753	-0.21275
10.4835	7.1315	10.4833	1.07355	10.4837	0.24665	10.4837	-0.20905
10.4918	7.04495	10.4917	1.06635	10.492	0.2344	10.492	-0.20805
10.5002	6.9577	10.5	1.0645	10.5003	0.22255	10.5003	-0.20785
10.5085	6.8739	10.5083	1.0588	10.5087	0.2106	10.5087	-0.20575
10.5168	6.78185	10.5167	1.05105	10.517	0.2023	10.517	-0.2005
10.5252	6.689	10.525	1.0414	10.5253	0.19635	10.5253	-0.19705
10.5335	6.59715	10.5333	1.0273	10.5337	0.1927	10.5337	-0.19135
10.5418	6.5045	10.5417	1.01295	10.542	0.1905	10.542	-0.18435
10.5502	6.4133	10.55	0.997851	10.5503	0.1934	10.5503	-0.17125
10.5585	6.3196	10.5583	0.978801	10.5587	0.19735	10.5587	-0.16075
10.5668	6.22465	10.5667	0.958451	10.567	0.20185	10.567	-0.15025
10.5752	6.1307	10.575	0.936201	10.5753	0.2107	10.5753	-0.13715
10.5835	6.0335	10.5833	0.913951	10.5837	0.2171	10.5837	-0.1254
10.5918	5.935	10.5917	0.890651	10.592	0.2239	10.592	-0.1173
10.6002	5.8375	10.6	0.866201	10.6003	0.231	10.6003	-0.108
10.6085	5.7385	10.6083	0.845301	10.6087	0.24185	10.6087	-0.0953
10.6168	5.64185	10.6167	0.820501	10.617	0.267	10.617	-0.0665
10.6252	5.54045	10.625	0.795351	10.6253	0.3172	10.6253	-0.00925
10.6335	5.4413	10.6333	0.775201	10.6337	0.39335	10.6337	0.07015
10.6418	5.34155	10.6417	0.751751	10.642	0.4818	10.642	0.13325
10.6502	5.2418	10.65	0.732151	10.6503	0.5209	10.6503	0.14255
10.6585	5.1404	10.6583	0.713901	10.6587	0.50855	10.6587	0.12065
10.6668	5.0424	10.6667	0.696601	10.667	0.48115	10.667	0.09815
10.6752	4.943	10.675	0.681751	10.6753	0.46025	10.6753	0.08565
10.6835	4.8443	10.6833	0.668001	10.6837	0.4521	10.6837	0.0713
10.6918	4.7462	10.6917	0.65565	10.692	0.4286	10.692	0.0362
10.7002	4.6504	10.7	0.64595	10.7003	0.38305	10.7003	-0.01695
10.7085	4.552	10.7083	0.63955	10.7087	0.3479	10.7087	-0.0621
10.7168	4.45665	10.7167	0.63025	10.717	0.37075	10.717	-0.0949
10.7252	4.36055	10.725	0.6245	10.7253	0.56675	10.7253	-0.0943
10.7335	4.26725	10.7333	0.61985	10.7337	1.2279	10.7337	-0.06465
10.7418	4.17465	10.7417	0.61805	10.742	2.72155	10.742	0.1146
10.7502	4.08245	10.75	0.61605	10.7503	4.77645	10.7503	0.8168
10.7585	3.99115	10.7583	0.6172	10.7587	6.36265	10.7587	1.7736
10.7668	3.90605	10.7667	0.617	10.767	7.10895	10.767	2.57975
10.7752	3.8184	10.775	0.61895	10.7753	7.38385	10.7753	3.1815
10.7835	3.7344	10.7833	0.6227	10.7837	7.5483	10.7837	3.62335
10.7918	3.65245	10.7917	0.62555	10.792	7.6663	10.792	3.97225
10.8002	3.57015	10.8	0.628601	10.8003	7.56925	10.8003	4.2534
10.8085	3.4899	10.8083	0.637101	10.8087	7.22725	10.8087	4.46075
10.8168	3.4111	10.8167	0.640701	10.817	6.791	10.817	4.59845
10.8252	3.33635	10.825	0.648001	10.8253	6.4069	10.8253	4.6857
10.8335	3.2614	10.8333	0.654351	10.8337	6.1266	10.8337	4.74135
10.8418	3.18775	10.8417	0.661151	10.842	5.9429	10.842	4.78045
10.8502	3.11825	10.85	0.671301	10.8503	5.82325	10.8503	4.81005
10.8585	3.04775	10.8583	0.681851	10.8587	5.7438	10.8587	4.833
10.8668	2.9803	10.8667	0.690351	10.867	5.6909	10.867	4.85095
10.8752	2.9148	10.875	0.702601	10.8753	5.65245	10.8753	4.863
10.8835	2.8484	10.8833	0.714101	10.8837	5.6249	10.8837	4.87595
10.8918	2.7831	10.8917	0.728301	10.892	5.6021	10.892	4.8833
10.9002	2.7258	10.9	0.743451	10.9003	5.58655	10.9003	4.89005
10.9085	2.6675	10.9083	0.761801	10.9087	5.5729	10.9087	4.8939
10.9168	2.6083	10.9167	0.780001	10.917	5.5601	10.917	4.8985
10.9252	2.55345	10.925	0.799451	10.9253	5.5509	10.9253	4.9025
10.9335	2.49995	10.9333	0.826751	10.9337	5.54355	10.9337	4.90335
10.9418	2.44675	10.9417	0.851951	10.942	5.53665	10.942	4.9053
10.9502	2.39715	10.95	0.882151	10.9503	5.5352	10.9503	4.9106
10.9585	2.34555	10.9583	0.915401	10.9587	5.53185	10.9587	4.91005
10.9668	2.29895	10.9667	0.957601	10.967	5.53135	10.967	4.9122
10.9752	2.2527	10.975	1.003	10.9753	5.5286	10.9753	4.9149
10.9835	2.2091	10.9833	1.05445	10.9837	5.528	10.9837	4.9166
10.9918	2.1656	10.9917	1.1154	10.992	5.52555	10.992	4.91715
11.0002	2.12425	11	1.1828	11.0003	5.52625	11.0003	4.9195
11.0085	2.085	11.0083	1.2593	11.0087	5.52135	11.0087	4.91865
11.0168	2.04665	11.0167	1.3424	11.017	5.5195	11.017	4.9202
11.0252	2.01095	11.025	1.43005	11.0253	5.5147	11.0253	4.92105
11.0335	1.97425	11.0333	1.5224	11.0337	5.5108	11.0337	4.91865
11.0418	1.9408	11.0417	1.61315	11.042	5.504	11.042	4.92
11.0502	1.9099	11.05	1.70125	11.0503	5.4982	11.0503	4.91695
11.0585	1.8754	11.0583	1.7797	11.0587	5.49085	11.0587	4.9133
11.0668	1.8451	11.0667	1.8528	11.067	5.48315	11.067	4.9133
11.0752	1.8152	11.075	1.91405	11.0753	5.4789	11.0753	4.91095
11.0835	1.79	11.0833	1.9616	11.0837	5.4731	11.0837	4.91045
11.0918	1.76205	11.0917	1.99995	11.092	5.46695	11.092	4.9104
11.1002	1.73555	11.1	2.02155	11.1003	5.4593	11.1003	4.90855
11.1085	1.7109	11.1083	2.03405	11.1087	5.4525	11.1087	4.9125
11.1168	1.6865	11.1167	2.0328	11.117	5.449	11.117	4.9171
11.1252	1.66385	11.125	2.02195	11.1253	5.44445	11.1253	4.9248
11.1335	1.64385	11.1333	2.001	11.1337	5.4421	11.1337	4.93545
11.1418	1.62105	11.1417	1.9708	11.142	5.44245	11.142	4.9489
11.1502	1.60015	11.15	1.9378	11.1503	5.44095	11.1503	4.96525
11.1585	1.5809	11.1583	1.8952	11.1587	5.4454	11.1587	4.98565
11.1668	1.56025	11.1667	1.85115	11.167	5.4494	11.167	5.00705
11.1752	1.54325	11.175	1.8022	11.1753	5.4573	11.1753	5.03315
11.1835	1.52485	11.1833	1.75395	11.1837	5.464	11.1837	5.0619
11.1918	1.50695	11.1917	1.703	11.192	5.47545	11.192	5.0917
11.2002	1.4921	11.2	1.6533	11.2003	5.48235	11.2003	5.11885
11.2085	1.4754	11.2083	1.59895	11.2087	5.4902	11.2087	5.14675
11.2168	1.46125	11.2167	1.5498	11.217	5.4999	11.217	5.17195
11.2252	1.4475	11.225	1.5016	11.2253	5.5064	11.2253	5.19345
11.2335	1.43345	11.2333	1.45565	11.2337	5.5111	11.2337	5.212
11.2418	1.41975	11.2417	1.411	11.242	5.515	11.242	5.2243
11.2502	1.40545	11.25	1.36745	11.2503	5.5121	11.2503	5.22885
11.2585	1.39425	11.2583	1.32715	11.2587	5.5082	11.2587	5.2283
11.2668	1.3807	11.2667	1.28695	11.267	5.5001	11.267	5.2249
11.2752	1.36915	11.275	1.25125	11.2753	5.4885	11.2753	5.20865
11.2835	1.3573	11.2833	1.2159	11.2837	5.4746	11.2837	5.18615
11.2918	1.344	11.2917	1.1854	11.292	5.4593	11.292	5.1655
11.3002	1.33535	11.3	1.1562	11.3003	5.4355	11.3003	5.1329
11.3085	1.3238	11.3083	1.12865	11.3087	5.41315	11.3087	5.09835
11.3168	1.3129	11.3167	1.10495	11.317	5.38725	11.317	5.0604
11.3252	1.30295	11.325	1.08225	11.3253	5.357	11.3253	5.01775
11.3335	1.29315	11.3333	1.0569	11.3337	5.3281	11.3337	4.9744
11.3418	1.28375	11.3417	1.03825	11.342	5.2991	11.342	4.929
11.3502	1.27285	11.35	1.0225	11.3503	5.2666	11.3503	4.88
11.3585	1.2641	11.3583	1.00505	11.3587	5.237	11.3587	4.8367
11.3668	1.2579	11.3667	0.989801	11.367	5.20745	11.367	4.7941
11.3752	1.248	11.375	0.977351	11.3753	5.17745	11.3753	4.75005
11.3835	1.24015	11.3833	0.964901	11.3837	5.14965	11.3837	4.71005
11.3918	1.23155	11.3917	0.951801	11.392	5.12305	11.392	4.6734
11.4002	1.2251	11.4	0.942751	11.4003	5.0986	11.4003	4.6393
11.4085	1.21665	11.4083	0.936301	11.4087	5.06935	11.4087	4.6044
11.4168	1.20955	11.4167	0.929601	11.417	5.04255	11.417	4.5732
11.4252	1.20185	11.425	0.921901	11.4253	5.01875	11.4253	4.5449
11.4335	1.19745	11.4333	0.915701	11.4337	4.9981	11.4337	4.5152
11.4418	1.19075	11.4417	0.910351	11.442	4.97535	11.442	4.49065
11.4502	1.1825	11.45	0.906801	11.4503	4.95645	11.4503	4.46825
11.4585	1.17725	11.4583	0.902101	11.4587	4.9338	11.4587	4.4433
11.4668	1.17145	11.4667	0.898551	11.467	4.9174	11.467	4.42225
11.4752	1.16295	11.475	0.895351	11.4753	4.89935	11.4753	4.4037
11.4835	1.1566	11.4833	0.893151	11.4837	4.8803	11.4837	4.38345
11.4918	1.1518	11.4917	0.892001	11.492	4.86235	11.492	4.3687
11.5002	1.14795	11.5	0.889451	11.5003	4.846	11.5003	4.34935
11.5085	1.14125	11.5083	0.887351	11.5087	4.8253	11.5087	4.33115
11.5168	1.1375	11.5167	0.884851	11.517	4.80635	11.517	4.31235
11.5252	1.1303	11.525	0.883901	11.5253	4.78975	11.5253	4.2955
11.5335	1.1264	11.5333	0.882501	11.5337	4.7712	11.5337	4.27805
11.5418	1.1234	11.5417	0.882101	11.542	4.7568	11.542	4.26155
11.5502	1.118	11.55	0.880051	11.5503	4.73745	11.5503	4.2425
11.5585	1.11525	11.5583	0.880351	11.5587	4.72105	11.5587	4.22725
11.5668	1.1093	11.5667	0.879301	11.567	4.7066	11.567	4.211
11.5752	1.1077	11.575	0.879251	11.5753	4.68705	11.5753	4.193
11.5835	1.104	11.5833	0.876501	11.5837	4.669	11.5837	4.17485
11.5918	1.10145	11.5917	0.877051	11.592	4.6529	11.592	4.1561
11.6002	1.0984	11.6	0.872901	11.6003	4.636	11.6003	4.1421
11.6085	1.09535	11.6083	0.874301	11.6087	4.6191	11.6087	4.12545
11.6168	1.09275	11.6167	0.873851	11.617	4.60195	11.617	4.1084
11.6252	1.09045	11.625	0.872101	11.6253	4.5884	11.6253	4.0937
11.6335	1.0873	11.6333	0.872551	11.6337	4.57055	11.6337	4.07725
11.6418	1.0865	11.6417	0.870401	11.642	4.55445	11.642	4.06315
11.6502	1.0842	11.65	0.869101	11.6503	4.53475	11.6503	4.04365
11.6585	1.0837	11.6583	0.869151	11.6587	4.5205	11.6587	4.0272
11.6668	1.08125	11.6667	0.868151	11.667	4.50355	11.667	4.0139
11.6752	1.0802	11.675	0.866801	11.6753	4.4872	11.6753	3.99925
11.6835	1.07975	11.6833	0.867701	11.6837	4.47045	11.6837	3.98465
11.6918	1.0774	11.6917	0.867501	11.692	4.45345	11.692	3.9685
11.7002	1.0738	11.7	0.866851	11.7003	4.43615	11.7003	3.95415
11.7085	1.07555	11.7083	0.865201	11.7087	4.41735	11.7087	3.93595
11.7168	1.0743	11.7167	0.864051	11.717	4.40035	11.717	3.919
11.7252	1.0757	11.725	0.862651	11.7253	4.3816	11.7253	3.90435
11.7335	1.07485	11.7333	0.862251	11.7337	4.36255	11.7337	3.88605
11.7418	1.07645	11.7417	0.861801	11.742	4.3425	11.742	3.8691
11.7502	1.07545	11.75	0.863451	11.7503	4.3257	11.7503	3.8535
11.7585	1.07485	11.7583	0.864251	11.7587	4.3021	11.7587	3.8351
11.7668	1.0759	11.7667	0.867101	11.767	4.2798	11.767	3.81565
11.7752	1.07955	11.775	0.866301	11.7753	4.25505	11.7753	3.7954
11.7835	1.0771	11.7833	0.870051	11.7837	4.2314	11.7837	3.77285
11.7918	1.0787	11.7917	0.872601	11.792	4.20605	11.792	3.7559
11.8002	1.08355	11.8	0.873901	11.8003	4.1775	11.8003	3.73225
11.8085	1.0833	11.8083	0.874901	11.8087	4.14775	11.8087	3.70745
11.8168	1.0881	11.8167	0.876801	11.817	4.11765	11.817	3.6827
11.8252	1.09055	11.825	0.877901	11.8253	4.08615	11.8253	3.65865
11.8335	1.0944	11.8333	0.881851	11.8337	4.0527	11.8337	3.6321
11.8418	1.0988	11.8417	0.881601	11.842	4.01945	11.842	3.60475
11.8502	1.10025	11.85	0.881551	11.8503	3.98395	11.8503	3.575
11.8585	1.10525	11.8583	0.882951	11.8587	3.9491	11.8587	3.54905
11.8668	1.11195	11.8667	0.882051	11.867	3.91405	11.867	3.5176
11.8752	1.1193	11.875	0.879801	11.8753	3.8765	11.8753	3.4872
11.8835	1.12475	11.8833	0.875551	11.8837	3.84035	11.8837	3.45935
11.8918	1.1347	11.8917	0.872051	11.892	3.8024	11.892	3.4276
11.9002	1.14165	11.9	0.866051	11.9003	3.76155	11.9003	3.39385
11.9085	1.14855	11.9083	0.862401	11.9087	3.72635	11.9087	3.3639
11.9168	1.1599	11.9167	0.856451	11.917	3.68685	11.917	3.32935
11.9252	1.1717	11.925	0.846701	11.9253	3.6487	11.9253	3.29675
11.9335	1.1784	11.9333	0.838151	11.9337	3.6099	11.9337	3.26275
11.9418	1.19155	11.9417	0.828101	11.942	3.57345	11.942	3.23045
11.9502	1.2032	11.95	0.816801	11.9503	3.5325	11.9503	3.19645
11.9585	1.21315	11.9583	0.805351	11.9587	3.4938	11.9587	3.1617
11.9668	1.2264	11.9667	0.796551	11.967	3.4569	11.967	3.12775
11.9752	1.23785	11.975	0.787151	11.9753	3.41605	11.9753	3.0922
11.9835	1.25045	11.9833	0.775551	11.9837	3.37715	11.9837	3.0579
11.9918	1.26075	11.9917	0.763801	11.992	3.33735	11.992	3.0227
12.0002	1.27245	12	0.752851	12.0003	3.29645	12.0003	2.98685
12.0085	1.28245	12.0083	0.743401	12.0087	3.259	12.0087	2.94995
12.0168	1.29445	12.0167	0.733501	12.017	3.2202	12.017	2.9166
12.0252	1.30555	12.025	0.723951	12.0253	3.1793	12.0253	2.8782
12.0335	1.3138	12.0333	0.714401	12.0337	3.14075	12.0337	2.84185
12.0418	1.3241	12.0417	0.707451	12.042	3.09805	12.042	2.80305
12.0502	1.3336	12.05	0.698401	12.0503	3.05775	12.0503	2.7665
12.0585	1.34425	12.0583	0.688551	12.0587	3.0165	12.0587	2.7267
12.0668	1.3506	12.0667	0.683151	12.067	2.97335	12.067	2.6861
12.0752	1.3593	12.075	0.678701	12.0753	2.92875	12.0753	2.64465
12.0835	1.36775	12.0833	0.671151	12.0837	2.8868	12.0837	2.6038
12.0918	1.37575	12.0917	0.669651	12.092	2.8414	12.092	2.5617
12.1002	1.3826	12.1	0.667251	12.1003	2.79955	12.1003	2.51765
12.1085	1.3885	12.1083	0.666551	12.1087	2.7542	12.1087	2.47705
12.1168	1.39635	12.1167	0.665501	12.117	2.70935	12.117	2.4332
12.1252	1.4016	12.125	0.670501	12.1253	2.6677	12.1253	2.3931
12.1335	1.40705	12.1333	0.677601	12.1337	2.6233	12.1337	2.3493
12.1418	1.41205	12.1417	0.690251	12.142	2.58015	12.142	2.30725
12.1502	1.41795	12.15	0.708651	12.1503	2.539	12.1503	2.2667
12.1585	1.4224	12.1583	0.730801	12.1587	2.49575	12.1587	2.22565
12.1668	1.426	12.1667	0.760351	12.167	2.4561	12.167	2.1885
12.1752	1.4326	12.175	0.795401	12.1753	2.4144	12.1753	2.1495
12.1835	1.43615	12.1833	0.837451	12.1837	2.3731	12.1837	2.10975
12.1918	1.439	12.1917	0.887951	12.192	2.3322	12.192	2.07135
12.2002	1.44445	12.2	0.943801	12.2003	2.29295	12.2003	2.03425
12.2085	1.45095	12.2083	1.00915	12.2087	2.25365	12.2087	1.996
12.2168	1.4523	12.2167	1.0773	12.217	2.21135	12.217	1.95765
12.2252	1.45275	12.225	1.15185	12.2253	2.17125	12.2253	1.91955
12.2335	1.46105	12.2333	1.2276	12.2337	2.1324	12.2337	1.884
12.2418	1.4617	12.2417	1.3045	12.242	2.09265	12.242	1.8469
12.2502	1.46635	12.25	1.3797	12.2503	2.05225	12.2503	1.80845
12.2585	1.4655	12.2583	1.45005	12.2587	2.012	12.2587	1.7719
12.2668	1.4679	12.2667	1.5149	12.267	1.9695	12.267	1.7345
12.2752	1.4701	12.275	1.575	12.2753	1.9308	12.2753	1.69475
12.2835	1.4684	12.2833	1.6246	12.2837	1.8901	12.2837	1.65635
12.2918	1.46925	12.2917	1.66045	12.292	1.84935	12.292	1.61705
12.3002	1.46885	12.3	1.6849	12.3003	1.80935	12.3003	1.58005
12.3085	1.46705	12.3083	1.6938	12.3087	1.76765	12.3087	1.53955
12.3168	1.46545	12.3167	1.69435	12.317	1.72425	12.317	1.50055
12.3252	1.46055	12.325	1.67925	12.3253	1.6831	12.3253	1.46
12.3335	1.4546	12.3333	1.64995	12.3337	1.6426	12.3337	1.42155
12.3418	1.44755	12.3417	1.61185	12.342	1.59995	12.342	1.3804
12.3502	1.43955	12.35	1.5637	12.3503	1.55875	12.3503	1.34085
12.3585	1.4303	12.3583	1.5059	12.3587	1.5179	12.3587	1.30315
12.3668	1.4214	12.3667	1.44365	12.367	1.47785	12.367	1.2661
12.3752	1.40775	12.375	1.3767	12.3753	1.4388	12.3753	1.2276
12.3835	1.39455	12.3833	1.3051	12.3837	1.39685	12.3837	1.1893
12.3918	1.38145	12.3917	1.23425	12.392	1.3589	12.392	1.15335
12.4002	1.36635	12.4	1.16485	12.4003	1.32095	12.4003	1.11625
12.4085	1.34915	12.4083	1.094	12.4087	1.28275	12.4087	1.08035
12.4168	1.3277	12.4167	1.0286	12.417	1.2449	12.417	1.047
12.4252	1.31015	12.425	0.96525	12.4253	1.2071	12.4253	1.01205
12.4335	1.29245	12.4333	0.9079	12.4337	1.1711	12.4337	0.9793
12.4418	1.2714	12.4417	0.85615	12.442	1.13625	12.442	0.94585
12.4502	1.24785	12.45	0.8072	12.4503	1.10355	12.4503	0.91535
12.4585	1.2273	12.4583	0.76395	12.4587	1.06805	12.4587	0.8833
12.4668	1.20565	12.4667	0.7233	12.467	1.03435	12.467	0.8506
12.4752	1.18425	12.475	0.6907	12.4753	1.00415	12.4753	0.82235
12.4835	1.16495	12.4833	0.66225	12.4837	0.97325	12.4837	0.7918
12.4918	1.14635	12.4917	0.6362	12.492	0.9428	12.492	0.7636
12.5002	1.12455	12.5	0.6112	12.5003	0.91335	12.5003	0.73475
12.5085	1.10755	12.5083	0.59395	12.5087	0.88605	12.5087	0.7093
12.5168	1.0889	12.5167	0.577	12.517	0.85675	12.517	0.6805
12.5252	1.07275	12.525	0.5609	12.5253	0.8292	12.5253	0.65735
12.5335	1.05245	12.5333	0.5499	12.5337	0.8024	12.5337	0.6314
12.5418	1.0397	12.5417	0.5398	12.542	0.7788	12.542	0.61
12.5502	1.02415	12.55	0.5306	12.5503	0.75545	12.5503	0.58715
12.5585	1.01075	12.5583	0.5233	12.5587	0.73125	12.5587	0.5639
12.5668	0.99695	12.5667	0.5171	12.567	0.7092	12.567	0.5424
12.5752	0.98585	12.575	0.5116	12.5753	0.6891	12.5753	0.5251
12.5835	0.97535	12.5833	0.50645	12.5837	0.6691	12.5837	0.50355
12.5918	0.9639	12.5917	0.5011	12.592	0.65135	12.592	0.4864
12.6002	0.954	12.6	0.49915	12.6003	0.6303	12.6003	0.46835
12.6085	0.948	12.6083	0.49585	12.6087	0.61285	12.6087	0.454
12.6168	0.93685	12.6167	0.48945	12.617	0.59585	12.617	0.43575
12.6252	0.9334	12.625	0.4865	12.6253	0.5795	12.6253	0.4217
12.6335	0.92225	12.6333	0.4838	12.6337	0.56355	12.6337	0.40825
12.6418	0.9183	12.6417	0.4832	12.642	0.54695	12.642	0.3922
12.6502	0.9143	12.65	0.47985	12.6503	0.5335	12.6503	0.37945
12.6585	0.97895	12.6583	0.4768	12.6587	0.5193	12.6587	0.3661
12.6668	0.8624	12.6667	0.47435	12.667	0.5094	12.667	0.35525
12.6752	0.9909	12.675	0.47085	12.6753	0.49685	12.6753	0.34315
12.6835	0.8952	12.6833	0.4705	12.6837	0.48485	12.6837	0.33175
12.6918	0.8742	12.6917	0.46875	12.692	0.4739	12.692	0.32095
12.7002	0.8845	12.7	0.46695	12.7003	0.464	12.7003	0.312
12.7085	0.8894	12.7083	0.4662	12.7087	0.45505	12.7087	0.3015
12.7168	0.88195	12.7167	0.46435	12.717	0.4467	12.717	0.2929
12.7252	0.87645	12.725	0.46115	12.7253	0.43775	12.7253	0.28475
12.7335	0.87855	12.7333	0.4595	12.7337	0.4301	12.7337	0.2788
12.7418	0.87545	12.7417	0.4567	12.742	0.422	12.742	0.26965
12.7502	0.87355	12.75	0.45795	12.7503	0.41565	12.7503	0.263
12.7585	0.8725	12.7583	0.45705	12.7587	0.40595	12.7587	0.2559
12.7668	0.8694	12.7667	0.4562	12.767	0.40205	12.767	0.25095
12.7752	0.86885	12.775	0.4574	12.7753	0.3959	12.7753	0.24505
12.7835	0.8679	12.7833	0.4551	12.7837	0.3886	12.7837	0.23955
12.7918	0.86855	12.7917	0.45715	12.792	0.3842	12.792	0.2346
12.8002	0.86855	12.8	0.45815	12.8003	0.38135	12.8003	0.2307
12.8085	0.8705	12.8083	0.4571	12.8087	0.374	12.8087	0.2269
12.8168	0.87055	12.8167	0.45865	12.817	0.36675	12.817	0.22225
12.8252	0.8718	12.825	0.46075	12.8253	0.363	12.8253	0.21685
12.8335	0.87155	12.8333	0.45985	12.8337	0.35765	12.8337	0.21375
12.8418	0.8748	12.8417	0.46275	12.842	0.35455	12.842	0.20845
12.8502	0.8749	12.85	0.4623	12.8503	0.3489	12.8503	0.2027
12.8585	0.87715	12.8583	0.4646	12.8587	0.34375	12.8587	0.1989
12.8668	0.87865	12.8667	0.4631	12.867	0.33905	12.867	0.195
12.8752	0.8815	12.875	0.4637	12.8753	0.3356	12.8753	0.1925
12.8835	0.8828	12.8833	0.46075	12.8837	0.33115	12.8837	0.19
12.8918	0.88725	12.8917	0.4602	12.892	0.3261	12.892	0.18595
12.9002	0.88935	12.9	0.45955	12.9003	0.32305	12.9003	0.1836
12.9085	0.8948	12.9083	0.45925	12.9087	0.31885	12.9087	0.17995
12.9168	0.89565	12.9167	0.4563	12.917	0.31525	12.917	0.1771
12.9252	0.9001	12.925	0.45475	12.9253	0.3124	12.9253	0.17655
12.9335	0.903	12.9333	0.45245	12.9337	0.3101	12.9337	0.17145
12.9418	0.9091	12.9417	0.45065	12.942	0.307	12.942	0.1684
12.9502	0.91035	12.95	0.44805	12.9503	0.3023	12.9503	0.1653
12.9585	0.9136	12.9583	0.44615	12.9587	0.2996	12.9587	0.16445
12.9668	0.9191	12.9667	0.4423	12.967	0.2966	12.967	0.15955
12.9752	0.9201	12.975	0.4393	12.9753	0.2937	12.9753	0.15795
12.9835	0.9244	12.9833	0.43975	12.9837	0.2912	12.9837	0.15765
12.9918	0.9292	12.9917	0.4377	12.992	0.28725	12.992	0.15495
13.0002	0.93155	13	0.43635	13.0003	0.28565	13.0003	0.1539
13.0085	0.93455	13.0083	0.4356	13.0087	0.28195	13.0087	0.152
13.0168	0.9367	13.0167	0.43345	13.017	0.2804	13.017	0.15035
13.0252	0.93735	13.025	0.4318	13.0253	0.2765	13.0253	0.1481
13.0335	0.9425	13.0333	0.4311	13.0337	0.2734	13.0337	0.14465
13.0418	0.94225	13.0417	0.4294	13.042	0.27125	13.042	0.14225
13.0502	0.94575	13.05	0.43055	13.0503	0.27005	13.0503	0.1399
13.0585	0.94365	13.0583	0.43235	13.0587	0.2673	13.0587	0.13775
13.0668	0.9441	13.0667	0.43245	13.067	0.26685	13.067	0.1353
13.0752	0.94365	13.075	0.43435	13.0753	0.26545	13.0753	0.1344
13.0835	0.94185	13.0833	0.4365	13.0837	0.2649	13.0837	0.1322
13.0918	0.93965	13.0917	0.4379	13.092	0.26305	13.092	0.1295
13.1002	0.93705	13.1	0.4381	13.1003	0.2621	13.1003	0.1288
13.1085	0.9335	13.1083	0.4407	13.1087	0.25915	13.1087	0.12755
13.1168	0.93045	13.1167	0.4415	13.117	0.25715	13.117	0.12465
13.1252	0.9261	13.125	0.4446	13.1253	0.25495	13.1253	0.1234
13.1335	0.9199	13.1333	0.446	13.1337	0.2552	13.1337	0.12525
13.1418	0.9126	13.1417	0.44895	13.142	0.25305	13.142	0.1241
13.1502	0.9083	13.15	0.4509	13.1503	0.2502	13.1503	0.1218
13.1585	0.9005	13.1583	0.45005	13.1587	0.2503	13.1587	0.1206
13.1668	0.89165	13.1667	0.45215	13.167	0.24975	13.167	0.1211
13.1752	0.8836	13.175	0.45485	13.1753	0.2477	13.1753	0.11735
13.1835	0.87425	13.1833	0.45475	13.1837	0.24755	13.1837	0.1172
13.1918	0.8647	13.1917	0.4535	13.192	0.2476	13.192	0.1182
13.2002	0.85655	13.2	0.4547	13.2003	0.24425	13.2003	0.11615
13.2085	0.8459	13.2083	0.454	13.2087	0.2412	13.2087	0.11365
13.2168	0.83875	13.2167	0.4516	13.217	0.2414	13.217	0.1126
13.2252	0.82935	13.225	0.4506	13.2253	0.23795	13.2253	0.11145
13.2335	0.82145	13.2333	0.4487	13.2337	0.2376	13.2337	0.10935
13.2418	0.8147	13.2417	0.4463	13.242	0.2378	13.242	0.10775
13.2502	0.80705	13.25	0.4451	13.2503	0.2375	13.2503	0.1082
13.2585	0.79715	13.2583	0.43975	13.2587	0.23535	13.2587	0.10535
13.2668	0.78985	13.2667	0.4409	13.267	0.2331	13.267	0.1044
13.2752	0.7833	13.275	0.4382	13.2753	0.2318	13.2753	0.10245
13.2835	0.77575	13.2833	0.4358	13.2837	0.231	13.2837	0.10095
13.2918	0.772	13.2917	0.4333	13.292	0.23105	13.292	0.1028
13.3002	0.76435	13.3	0.4295	13.3003	0.2294	13.3003	0.1014
13.3085	0.7603	13.3083	0.42765	13.3087	0.2269	13.3087	0.09885
13.3168	0.75015	13.3167	0.42695	13.317	0.2261	13.317	0.0975
13.3252	0.74825	13.325	0.42305	13.3253	0.22675	13.3253	0.0988
13.3335	0.7398	13.3333	0.4207	13.3337	0.2245	13.3337	0.09715
13.3418	0.7378	13.3417	0.41985	13.342	0.2271	13.342	0.0973
13.3502	0.73185	13.35	0.4169	13.3503	0.22585	13.3503	0.0986
13.3585	0.7285	13.3583	0.41525	13.3587	0.22495	13.3587	0.09795
13.3668	0.72595	13.3667	0.41395	13.367	0.226	13.367	0.0975
13.3752	0.7213	13.375	0.41	13.3753	0.2232	13.3753	0.0945
13.3835	0.71915	13.3833	0.40755	13.3837	0.2226	13.3837	0.09705
13.3918	0.7162	13.3917	0.4067	13.392	0.22285	13.392	0.0948
13.4002	0.712	13.4	0.4051	13.4003	0.22195	13.4003	0.09395
13.4085	0.7078	13.4083	0.4036	13.4087	0.22285	13.4087	0.09485
13.4168	0.70685	13.4167	0.403	13.417	0.22465	13.417	0.0937
13.4252	0.70475	13.425	0.399	13.4253	0.22565	13.4253	0.09295
13.4335	0.70305	13.4333	0.3988	13.4337	0.22695	13.4337	0.0919
13.4418	0.6999	13.4417	0.3979	13.442	0.22705	13.442	0.09135
13.4502	0.6995	13.45	0.39395	13.4503	0.22925	13.4503	0.09145
13.4585	0.69625	13.4583	0.39435	13.4587	0.23295	13.4587	0.0906
13.4668	0.6967	13.4667	0.3921	13.467	0.2356	13.467	0.09245
13.4752	0.6956	13.475	0.3932	13.4753	0.2403	13.4753	0.0922
13.4835	0.6947	13.4833	0.3907	13.4837	0.246	13.4837	0.095
13.4918	0.6917	13.4917	0.39055	13.492	0.2524	13.492	0.0965
13.5002	0.69155	13.5	0.3891	13.5003	0.2592	13.5003	0.0964
13.5085	0.6926	13.5083	0.38805	13.5087	0.2684	13.5087	0.0987
13.5168	0.7132	13.5167	0.38945	13.517	0.27895	13.517	0.10235
13.5252	0.71365	13.525	0.38575	13.5253	0.2863	13.5253	0.10255
13.5335	0.6626	13.5333	0.3852	13.5337	0.29925	13.5337	0.1061
13.5418	0.6984	13.5417	0.38535	13.542	0.31235	13.542	0.11015
13.5502	0.7116	13.55	0.38605	13.5503	0.3217	13.5503	0.1128
13.5585	0.70225	13.5583	0.3851	13.5587	0.33385	13.5587	0.11665
13.5668	0.69055	13.5667	0.38615	13.567	0.34285	13.567	0.121
13.5752	0.6857	13.575	0.3861	13.5753	0.3536	13.5753	0.1262
13.5835	0.68155	13.5833	0.38415	13.5837	0.3592	13.5837	0.1305
13.5918	0.68545	13.5917	0.3857	13.592	0.3636	13.592	0.13065
13.6002	0.6847	13.6	0.3838	13.6003	0.36785	13.6003	0.1355
13.6085	0.6869	13.6083	0.38555	13.6087	0.372	13.6087	0.1396
13.6168	0.68715	13.6167	0.38385	13.617	0.37435	13.617	0.14245
13.6252	0.6873	13.625	0.3821	13.6253	0.3754	13.6253	0.14765
13.6335	0.6894	13.6333	0.38275	13.6337	0.3725	13.6337	0.14825
13.6418	0.6932	13.6417	0.38375	13.642	0.37	13.642	0.15145
13.6502	0.6963	13.65	0.38325	13.6503	0.36955	13.6503	0.15445
13.6585	0.69655	13.6583	0.38425	13.6587	0.36395	13.6587	0.1574
13.6668	0.7001	13.6667	0.38585	13.667	0.3601	13.667	0.1583
13.6752	0.70635	13.675	0.38635	13.6753	0.35185	13.6753	0.15945
13.6835	0.7106	13.6833	0.39005	13.6837	0.348	13.6837	0.15955
13.6918	0.71305	13.6917	0.38965	13.692	0.34265	13.692	0.1586
13.7002	0.7194	13.7	0.3913	13.7003	0.33685	13.7003	0.1585
13.7085	0.7232	13.7083	0.39265	13.7087	0.33135	13.7087	0.1586
13.7168	0.7286	13.7167	0.39335	13.717	0.3252	13.717	0.15625
13.7252	0.73265	13.725	0.396	13.7253	0.31925	13.7253	0.15735
13.7335	0.74045	13.7333	0.394	13.7337	0.31435	13.7337	0.15765
13.7418	0.74585	13.7417	0.39305	13.742	0.3094	13.742	0.15825
13.7502	0.75005	13.75	0.39485	13.7503	0.3045	13.7503	0.1566
13.7585	0.75615	13.7583	0.39705	13.7587	0.30005	13.7587	0.1584
13.7668	0.7598	13.7667	0.40005	13.767	0.29505	13.767	0.15705
13.7752	0.76665	13.775	0.40005	13.7753	0.29155	13.7753	0.15455
13.7835	0.7737	13.7833	0.39915	13.7837	0.28865	13.7837	0.15565
13.7918	0.7766	13.7917	0.40305	13.792	0.28715	13.792	0.15495
13.8002	0.78265	13.8	0.4008	13.8003	0.28545	13.8003	0.1554
13.8085	0.78575	13.8083	0.4018	13.8087	0.2858	13.8087	0.15635
13.8168	0.7908	13.8167	0.4011	13.817	0.2833	13.817	0.1563
13.8252	0.79365	13.825	0.40365	13.8253	0.2842	13.8253	0.1582
13.8335	0.79625	13.8333	0.3997	13.8337	0.28405	13.8337	0.1617
13.8418	0.7994	13.8417	0.4019	13.842	0.28665	13.842	0.163
13.8502	0.7978	13.85	0.4002	13.8503	0.28835	13.8503	0.16705
13.8585	0.8015	13.8583	0.39845	13.8587	0.28935	13.8587	0.1713
13.8668	0.8004	13.8667	0.40125	13.867	0.2936	13.867	0.17465
13.8752	0.79965	13.875	0.40065	13.8753	0.29805	13.8753	0.17795
13.8835	0.80045	13.8833	0.3978	13.8837	0.30115	13.8837	0.18565
13.8918	0.7963	13.8917	0.40035	13.892	0.3058	13.892	0.1917
13.9002	0.7931	13.9	0.39935	13.9003	0.31015	13.9003	0.1979
13.9085	0.79305	13.9083	0.3955	13.9087	0.31545	13.9087	0.20535
13.9168	0.78735	13.9167	0.3964	13.917	0.32335	13.917	0.21145
13.9252	0.7844	13.925	0.39525	13.9253	0.3313	13.9253	0.22205
13.9335	0.77855	13.9333	0.3953	13.9337	0.34045	13.9337	0.2303
13.9418	0.77575	13.9417	0.39535	13.942	0.34495	13.942	0.23755
13.9502	0.77015	13.95	0.3981	13.9503	0.35385	13.9503	0.24745
13.9585	0.76355	13.9583	0.39285	13.9587	0.36195	13.9587	0.254
13.9668	0.7584	13.9667	0.3939	13.967	0.36865	13.967	0.26295
13.9752	0.75345	13.975	0.39175	13.9753	0.3763	13.9753	0.27085
13.9835	0.74725	13.9833	0.39245	13.9837	0.38575	13.9837	0.27925
13.9918	0.74165	13.9917	0.393	13.992	0.39375	13.992	0.2896
14.0002	0.7341	14	0.3916	14.0003	0.40015	14.0003	0.29695
14.0085	0.72995	14.0083	0.3921	14.0087	0.40855	14.0087	0.3041
14.0168	0.7252	14.0167	0.391	14.017	0.41855	14.017	0.315
14.0252	0.7227	14.025	0.3931	14.0253	0.42465	14.0253	0.3208
14.0335	0.7154	14.0333	0.38895	14.0337	0.4323	14.0337	0.32845
14.0418	0.7113	14.0417	0.39095	14.042	0.43855	14.042	0.336
14.0502	0.7103	14.05	0.3908	14.0503	0.44595	14.0503	0.3442
14.0585	0.70255	14.0583	0.38955	14.0587	0.4482	14.0587	0.3495
14.0668	0.69925	14.0667	0.3906	14.067	0.45355	14.067	0.3544
14.0752	0.69545	14.075	0.3904	14.0753	0.46155	14.0753	0.3632
14.0835	0.695	14.0833	0.39425	14.0837	0.46625	14.0837	0.36805
14.0918	0.68965	14.0917	0.39315	14.092	0.47325	14.092	0.3739
14.1002	0.6862	14.1	0.3941	14.1003	0.4785	14.1003	0.3807
14.1085	0.6841	14.1083	0.3975	14.1087	0.48365	14.1087	0.3861
14.1168	0.6821	14.1167	0.40265	14.117	0.48705	14.117	0.39145
14.1252	0.67945	14.125	0.40545	14.1253	0.48935	14.1253	0.394
14.1335	0.67825	14.1333	0.4124	14.1337	0.4933	14.1337	0.3998
14.1418	0.6769	14.1417	0.4146	14.142	0.4957	14.142	0.40115
14.1502	0.6779	14.15	0.4208	14.1503	0.5009	14.1503	0.40495
14.1585	0.6751	14.1583	0.4273	14.1587	0.50115	14.1587	0.4051
14.1668	0.67375	14.1667	0.43455	14.167	0.50355	14.167	0.40715
14.1752	0.67515	14.175	0.44225	14.1753	0.50685	14.1753	0.4118
14.1835	0.6735	14.1833	0.44735	14.1837	0.5121	14.1837	0.41515
14.1918	0.6749	14.1917	0.45555	14.192	0.5108	14.192	0.4134
14.2002	0.6751	14.2	0.46055	14.2003	0.5148	14.2003	0.41675
14.2085	0.6757	14.2083	0.46675	14.2087	0.5183	14.2087	0.4191
14.2168	0.67585	14.2167	0.4723	14.217	0.5187	14.217	0.41995
14.2252	0.67825	14.225	0.4808	14.2253	0.516	14.2253	0.4212
14.2335	0.6821	14.2333	0.4837	14.2337	0.52405	14.2337	0.42505
14.2418	0.68325	14.2417	0.4895	14.242	0.5273	14.242	0.42595
14.2502	0.6904	14.25	0.49115	14.2503	0.52755	14.2503	0.42655
14.2585	0.6932	14.2583	0.49585	14.2587	0.5323	14.2587	0.4281
14.2668	0.70005	14.2667	0.4984	14.267	0.5342	14.267	0.431
14.2752	0.68625	14.275	0.4992	14.2753	0.53625	14.2753	0.43385
14.2835	0.7531	14.2833	0.4978	14.2837	0.53685	14.2837	0.4349
14.2918	0.7367	14.2917	0.49455	14.292	0.5386	14.292	0.43685
14.3002	0.71815	14.3	0.4956	14.3003	0.5416	14.3003	0.43965
14.3085	0.7616	14.3083	0.49285	14.3087	0.54275	14.3087	0.43875
14.3168	0.7712	14.3167	0.4887	14.317	0.5427	14.317	0.4377
14.3252	0.7787	14.325	0.48595	14.3253	0.54415	14.3253	0.4394
14.3335	0.7944	14.3333	0.48105	14.3337	0.54225	14.3337	0.43705
14.3418	0.8134	14.3417	0.4736	14.342	0.54175	14.342	0.4347
14.3502	0.8368	14.35	0.4692	14.3503	0.54015	14.3503	0.43285
14.3585	0.8648	14.3583	0.4629	14.3587	0.5369	14.3587	0.4285
14.3668	0.89545	14.3667	0.4559	14.367	0.5341	14.367	0.424
14.3752	0.92785	14.375	0.44845	14.3753	0.5295	14.3753	0.41965
14.3835	0.9611	14.3833	0.4419	14.3837	0.52405	14.3837	0.4145
14.3918	0.9979	14.3917	0.4355	14.392	0.5161	14.392	0.40535
14.4002	1.03775	14.4	0.427	14.4003	0.51145	14.4003	0.3983
14.4085	1.07685	14.4083	0.4194	14.4087	0.5053	14.4087	0.39055
14.4168	1.12195	14.4167	0.41205	14.417	0.49465	14.417	0.3794
14.4252	1.16515	14.425	0.4054	14.4253	0.4864	14.4253	0.3706
14.4335	1.2122	14.4333	0.3983	14.4337	0.4776	14.4337	0.35765
14.4418	1.25875	14.4417	0.39105	14.442	0.46885	14.442	0.34495
14.4502	1.3034	14.45	0.3878	14.4503	0.45955	14.4503	0.3326
14.4585	1.34905	14.4583	0.3797	14.4587	0.4495	14.4587	0.31915
14.4668	1.39175	14.4667	0.37825	14.467	0.4393	14.467	0.3023
14.4752	1.43485	14.475	0.3709	14.4753	0.4324	14.4753	0.29045
14.4835	1.4738	14.4833	0.3671	14.4837	0.4227	14.4837	0.27725
14.4918	1.5098	14.4917	0.363	14.492	0.41455	14.492	0.264
14.5002	1.54585	14.5	0.36105	14.5003	0.40505	14.5003	0.24895
14.5085	1.57505	14.5083	0.3596	14.5087	0.39805	14.5087	0.2364
14.5168	1.60305	14.5167	0.3574	14.517	0.3901	14.517	0.224
14.5252	1.6239	14.525	0.35615	14.5253	0.3827	14.5253	0.20975
14.5335	1.64145	14.5333	0.35505	14.5337	0.375	14.5337	0.19685
14.5418	1.6528	14.5417	0.35565	14.542	0.3685	14.542	0.18685
14.5502	1.6621	14.55	0.35295	14.5503	0.36125	14.5503	0.17595
14.5585	1.6595	14.5583	0.35105	14.5587	0.3539	14.5587	0.16555
14.5668	1.6541	14.5667	0.3511	14.567	0.34685	14.567	0.15715
14.5752	1.64605	14.575	0.35045	14.5753	0.33985	14.5753	0.14875
14.5835	1.62985	14.5833	0.3509	14.5837	0.3329	14.5837	0.1427
14.5918	1.61055	14.5917	0.3474	14.592	0.32545	14.592	0.13375
14.6002	1.5832	14.6	0.3469	14.6003	0.31605	14.6003	0.12835
14.6085	1.55455	14.6083	0.3512	14.6087	0.30995	14.6087	0.12325
14.6168	1.52015	14.6167	0.34885	14.617	0.3048	14.617	0.11765
14.6252	1.48225	14.625	0.3495	14.6253	0.29865	14.6253	0.1133
14.6335	1.44315	14.6333	0.34745	14.6337	0.29375	14.6337	0.10985
14.6418	1.4021	14.6417	0.34925	14.642	0.28835	14.642	0.10615
14.6502	1.357	14.65	0.3501	14.6503	0.2841	14.6503	0.103
14.6585	1.3095	14.6583	0.35045	14.6587	0.28125	14.6587	0.09725
14.6668	1.264	14.6667	0.34925	14.667	0.27995	14.667	0.09685
14.6752	1.218	14.675	0.35335	14.6753	0.27915	14.6753	0.09705
14.6835	1.17295	14.6833	0.3489	14.6837	0.27845	14.6837	0.0938
14.6918	1.12755	14.6917	0.352	14.692	0.2811	14.692	0.09365
14.7002	1.0812	14.7	0.3519	14.7003	0.2827	14.7003	0.09245
14.7085	1.04185	14.7083	0.3509	14.7087	0.28645	14.7087	0.0896
14.7168	1.00015	14.7167	0.3528	14.717	0.29165	14.717	0.0906
14.7252	0.96255	14.725	0.3535	14.7253	0.296	14.7253	0.08805
14.7335	0.92645	14.7333	0.3524	14.7337	0.3012	14.7337	0.0884
14.7418	0.894	14.7417	0.35375	14.742	0.30825	14.742	0.0884
14.7502	0.8621	14.75	0.35325	14.7503	0.31525	14.7503	0.09135
14.7585	0.83405	14.7583	0.28305	14.7587	0.32325	14.7587	0.09265
14.7668	0.8082	14.7667	0.41835	14.767	0.32805	14.767	0.0918
14.7752	0.78555	14.775	0.4061	14.7753	0.33255	14.7753	0.0919
14.7835	0.76445	14.7833	0.33105	14.7837	0.3411	14.7837	0.0953
14.7918	0.7474	14.7917	0.34715	14.792	0.3451	14.792	0.09505
14.8002	0.73295	14.8	0.3485	14.8003	0.35425	14.8003	0.0995
14.8085	0.7171	14.8083	0.35235	14.8087	0.3598	14.8087	0.10015
14.8168	0.70535	14.8167	0.3517	14.817	0.36745	14.817	0.10085
14.8252	0.6921	14.825	0.35215	14.8253	0.37445	14.8253	0.10625
14.8335	0.6828	14.8333	0.3526	14.8337	0.38165	14.8337	0.1079
14.8418	0.6751	14.8417	0.35165	14.842	0.3912	14.842	0.1114
14.8502	0.66645	14.85	0.35365	14.8503	0.40045	14.8503	0.1157
14.8585	0.66045	14.8583	0.35275	14.8587	0.4121	14.8587	0.1219
14.8668	0.65645	14.8667	0.35185	14.867	0.4231	14.867	0.1287
14.8752	0.6504	14.875	0.3526	14.8753	0.43635	14.8753	0.13615
14.8835	0.64415	14.8833	0.3509	14.8837	0.45	14.8837	0.1445
14.8918	0.64265	14.8917	0.35265	14.892	0.4656	14.892	0.15335
14.9002	0.6404	14.9	0.3514	14.9003	0.48045	14.9003	0.16235
14.9085	0.6359	14.9083	0.3521	14.9087	0.4992	14.9087	0.17525
14.9168	0.63535	14.9167	0.35045	14.917	0.51795	14.917	0.18995
14.9252	0.63185	14.925	0.3515	14.9253	0.5378	14.9253	0.2037
14.9335	0.6291	14.9333	0.3507	14.9337	0.55725	14.9337	0.2184
14.9418	0.6283	14.9417	0.3504	14.942	0.57885	14.942	0.2361
14.9502	0.62565	14.95	0.35125	14.9503	0.60385	14.9503	0.2543
14.9585	0.6245	14.9583	0.35045	14.9587	0.63105	14.9587	0.2761
14.9668	0.62305	14.9667	0.35	14.967	0.66	14.967	0.3018
14.9752	0.6215	14.975	0.3499	14.9753	0.69225	14.9753	0.329
14.9835	0.62115	14.9833	0.3511	14.9837	0.7315	14.9837	0.36545
14.9918	0.6194	14.9917	0.3506	14.992	0.76905	14.992	0.40555
15.0002	0.61725	15	0.3493	15.0003	0.811	15.0003	0.4537
15.0085	0.61565	15.0083	0.34935	15.0087	0.8553	15.0087	0.5113
15.0168	0.61335	15.0167	0.35015	15.017	0.8988	15.017	0.5827
15.0252	0.61345	15.025	0.35	15.0253	0.9417	15.0253	0.6627
15.0335	0.6115	15.0333	0.34925	15.0337	0.9803	15.0337	0.74875
15.0418	0.611	15.0417	0.3509	15.042	1.0203	15.042	0.8467
15.0502	0.60855	15.05	0.35075	15.0503	1.04795	15.0503	0.9412
15.0585	0.6081	15.0583	0.35065	15.0587	1.07315	15.0587	1.03645
15.0668	0.6081	15.0667	0.35045	15.067	1.08905	15.067	1.1269
15.0752	0.60365	15.075	0.34965	15.0753	1.09765	15.0753	1.2098
15.0835	0.6393	15.0833	0.3492	15.0837	1.0999	15.0837	1.284
15.0918	0.7035	15.0917	0.35075	15.092	1.09595	15.092	1.3464
15.1002	0.5763	15.1	0.3503	15.1003	1.0866	15.1003	1.3988
15.1085	0.62905	15.1083	0.3546	15.1087	1.07085	15.1087	1.43655
15.1168	0.6149	15.1167	0.35095	15.117	1.0465	15.117	1.46125
15.1252	0.60555	15.125	0.35375	15.1253	1.01975	15.1253	1.4779
15.1335	0.6032	15.1333	0.3515	15.1337	0.9918	15.1337	1.4884
15.1418	0.60215	15.1417	0.3515	15.142	0.9604	15.142	1.48835
15.1502	0.60265	15.15	0.3519	15.1503	0.92705	15.1503	1.48325
15.1585	0.601	15.1583	0.34775	15.1587	0.89155	15.1587	1.4699
15.1668	0.60195	15.1667	0.34785	15.167	0.8538	15.167	1.4544
15.1752	0.5989	15.175	0.34735	15.1753	0.8166	15.1753	1.43425
15.1835	0.60115	15.1833	0.347	15.1837	0.77865	15.1837	1.40925
15.1918	0.60025	15.1917	0.3443	15.192	0.7415	15.192	1.38585
15.2002	0.59915	15.2	0.344	15.2003	0.7042	15.2003	1.3586
15.2085	0.59935	15.2083	0.3435	15.2087	0.66975	15.2087	1.3325
15.2168	0.5981	15.2167	0.34215	15.217	0.6337	15.217	1.3003
15.2252	0.5957	15.225	0.3421	15.2253	0.59965	15.2253	1.2729
15.2335	0.5971	15.2333	0.3414	15.2337	0.564	15.2337	1.24265
15.2418	0.59675	15.2417	0.34055	15.242	0.53175	15.242	1.2129
15.2502	0.5965	15.25	0.3395	15.2503	0.50305	15.2503	1.18525
15.2585	0.5965	15.2583	0.339	15.2587	0.47535	15.2587	1.1568
15.2668	0.59825	15.2667	0.33755	15.267	0.4471	15.267	1.1284
15.2752	0.5984	15.275	0.3381	15.2753	0.4222	15.2753	1.09855
15.2835	0.59795	15.2833	0.33675	15.2837	0.3975	15.2837	1.0693
15.2918	0.59685	15.2917	0.33805	15.292	0.3743	15.292	1.0403
15.3002	0.59645	15.3	0.3349	15.3003	0.35255	15.3003	1.0142
15.3085	0.59885	15.3083	0.3347	15.3087	0.33325	15.3087	0.9871
15.3168	0.59785	15.3167	0.335	15.317	0.3173	15.317	0.96225
15.3252	0.59775	15.325	0.3351	15.3253	0.2998	15.3253	0.93985
15.3335	0.59905	15.3333	0.33295	15.3337	0.28435	15.3337	0.91595
15.3418	0.5986	15.3417	0.3324	15.342	0.27295	15.342	0.89415
15.3502	0.59995	15.35	0.332	15.3503	0.26	15.3503	0.87385
15.3585	0.60015	15.3583	0.3299	15.3587	0.25	15.3587	0.85645
15.3668	0.6023	15.3667	0.32915	15.367	0.2399	15.367	0.83565
15.3752	0.6031	15.375	0.3294	15.3753	0.2318	15.3753	0.8173
15.3835	0.6047	15.3833	0.3277	15.3837	0.2238	15.3837	0.80055
15.3918	0.60535	15.3917	0.3251	15.392	0.2194	15.392	0.7864
15.4002	0.60675	15.4	0.3261	15.4003	0.21225	15.4003	0.7673
15.4085	0.607	15.4083	0.3273	15.4087	0.2062	15.4087	0.75315
15.4168	0.61035	15.4167	0.3252	15.417	0.20005	15.417	0.73695
15.4252	0.61105	15.425	0.3251	15.4253	0.19645	15.4253	0.7247
15.4335	0.61215	15.4333	0.32835	15.4337	0.19325	15.4337	0.71405
15.4418	0.6122	15.4417	0.32835	15.442	0.1888	15.442	0.70035
15.4502	0.61515	15.45	0.3259	15.4503	0.1847	15.4503	0.68865
15.4585	0.617	15.4583	0.324	15.4587	0.18	15.4587	0.6738
15.4668	0.6193	15.4667	0.32535	15.467	0.1773	15.467	0.66185
15.4752	0.6192	15.475	0.32625	15.4753	0.1744	15.4753	0.6484
15.4835	0.62125	15.4833	0.3282	15.4837	0.17335	15.4837	0.63635
15.4918	0.6236	15.4917	0.3267	15.492	0.17015	15.492	0.62565
15.5002	0.62485	15.5	0.31315	15.5003	0.16695	15.5003	0.61415
15.5085	0.62575	15.5083	0.28555	15.5087	0.16295	15.5087	0.59915
15.5168	0.6287	15.5167	0.34025	15.517	0.16415	15.517	0.58865
15.5252	0.6305	15.525	0.28105	15.5253	0.16035	15.5253	0.57505
15.5335	0.6296	15.5333	0.3135	15.5337	0.15905	15.5337	0.56265
15.5418	0.629	15.5417	0.32125	15.542	0.15945	15.542	0.5527
15.5502	0.63025	15.55	0.3253	15.5503	0.1558	15.5503	0.5396
15.5585	0.62895	15.5583	0.32565	15.5587	0.1549	15.5587	0.5277
15.5668	0.62935	15.5667	0.3265	15.567	0.153	15.567	0.51585
15.5752	0.6274	15.575	0.32645	15.5753	0.1494	15.5753	0.50235
15.5835	0.627	15.5833	0.3237	15.5837	0.1493	15.5837	0.48985
15.5918	0.6257	15.5917	0.32465	15.592	0.14795	15.592	0.47765
15.6002	0.6241	15.6	0.3255	15.6003	0.14575	15.6003	0.46655
15.6085	0.6213	15.6083	0.32695	15.6087	0.14345	15.6087	0.45555
15.6168	0.62035	15.6167	0.3249	15.617	0.14065	15.617	0.44375
15.6252	0.61785	15.625	0.3256	15.6253	0.13705	15.6253	0.43025
15.6335	0.6147	15.6333	0.32545	15.6337	0.1352	15.6337	0.4195
15.6418	0.61205	15.6417	0.32635	15.642	0.13195	15.642	0.40545
15.6502	0.61065	15.65	0.3254	15.6503	0.12815	15.6503	0.394
15.6585	0.60505	15.6583	0.32415	15.6587	0.12715	15.6587	0.3828
15.6668	0.60315	15.6667	0.32455	15.667	0.12375	15.667	0.3705
15.6752	0.60215	15.675	0.32265	15.6753	0.12095	15.6753	0.35905
15.6835	0.60045	15.6833	0.32375	15.6837	0.11735	15.6837	0.34835
15.6918	0.59625	15.6917	0.32245	15.692	0.11475	15.692	0.3369
15.7002	0.59475	15.7	0.3206	15.7003	0.1113	15.7003	0.32775
15.7085	0.59215	15.7083	0.3219	15.7087	0.10815	15.7087	0.31665
15.7168	0.5872	15.7167	0.32225	15.717	0.1075	15.717	0.3078
15.7252	0.5872	15.725	0.3191	15.7253	0.1035	15.7253	0.2972
15.7335	0.5867	15.7333	0.31765	15.7337	0.10255	15.7337	0.2897
15.7418	0.58725	15.7417	0.3198	15.742	0.0985	15.742	0.27945
15.7502	0.58475	15.75	0.31995	15.7503	0.0964	15.7503	0.2717
15.7585	0.58425	15.7583	0.32	15.7587	0.09575	15.7587	0.26385
15.7668	0.5839	15.7667	0.31735	15.767	0.09415	15.767	0.25585
15.7752	0.58625	15.775	0.3182	15.7753	0.08985	15.7753	0.24415
15.7835	0.5863	15.7833	0.3173	15.7837	0.0902	15.7837	0.2386
15.7918	0.58715	15.7917	0.31915	15.792	0.08995	15.792	0.23275
15.8002	0.58865	15.8	0.31825	15.8003	0.08655	15.8003	0.22525
15.8085	0.5902	15.8083	0.31805	15.8087	0.0858	15.8087	0.21855
15.8168	0.5939	15.8167	0.3151	15.817	0.08505	15.817	0.213
15.8252	0.5983	15.825	0.31555	15.8253	0.0849	15.8253	0.208
15.8335	0.60225	15.8333	0.3148	15.8337	0.08165	15.8337	0.2008
15.8418	0.6066	15.8417	0.31415	15.842	0.0808	15.842	0.1922
15.8502	0.61375	15.85	0.31205	15.8503	0.08085	15.8503	0.18765
15.8585	0.61865	15.8583	0.31195	15.8587	0.07895	15.8587	0.1808
15.8668	0.6273	15.8667	0.3109	15.867	0.0772	15.867	0.17605
15.8752	0.63385	15.875	0.3106	15.8753	0.0734	15.8753	0.16805
15.8835	0.64135	15.8833	0.30835	15.8837	0.0746	15.8837	0.1647
15.8918	0.6528	15.8917	0.31105	15.892	0.07435	15.892	0.1586
15.9002	0.66275	15.9	0.3101	15.9003	0.07505	15.9003	0.15455
15.9085	0.6737	15.9083	0.31095	15.9087	0.0719	15.9087	0.14805
15.9168	0.686	15.9167	0.31005	15.917	0.07275	15.917	0.14535
15.9252	0.69995	15.925	0.30755	15.9253	0.07455	15.9253	0.142
15.9335	0.7114	15.9333	0.3104	15.9337	0.07245	15.9337	0.13525
15.9418	0.7257	15.9417	0.3078	15.942	0.0737	15.942	0.13125
15.9502	0.73905	15.95	0.3087	15.9503	0.0739	15.9503	0.1282
15.9585	0.75375	15.9583	0.31065	15.9587	0.07355	15.9587	0.12325
15.9668	0.76775	15.9667	0.30945	15.967	0.0741	15.967	0.11835
15.9752	0.7831	15.975	0.30835	15.9753	0.0746	15.9753	0.11645
15.9835	0.7986	15.9833	0.30965	15.9837	0.0775	15.9837	0.114
15.9918	0.81425	15.9917	0.30895	15.992	0.07715	15.992	0.11245
16.0002	0.82945	16	0.30695	16.0003	0.0787	16.0003	0.10785
16.0085	0.8442	16.0083	0.3091	16.0087	0.0808	16.0087	0.10465
16.0168	0.8577	16.0167	0.30795	16.017	0.08075	16.017	0.09985
16.0252	0.87135	16.025	0.3085	16.0253	0.08465	16.0253	0.0983
16.0335	0.88565	16.0333	0.30805	16.0337	0.0854	16.0337	0.0941
16.0418	0.89835	16.0417	0.3061	16.042	0.08875	16.042	0.0916
16.0502	0.9108	16.05	0.309	16.0503	0.09195	16.0503	0.09045
16.0585	0.92165	16.0583	0.3088	16.0587	0.09845	16.0587	0.0902
16.0668	0.9332	16.0667	0.3094	16.067	0.10335	16.067	0.08925
16.0752	0.9438	16.075	0.30735	16.0753	0.1076	16.0753	0.0862
16.0835	0.9516	16.0833	0.30605	16.0837	0.1136	16.0837	0.0846
16.0918	0.9583	16.0917	0.3079	16.092	0.12125	16.092	0.0847
16.1002	0.9658	16.1	0.3074	16.1003	0.12775	16.1003	0.0865
16.1085	0.96925	16.1083	0.31075	16.1087	0.13625	16.1087	0.0884
16.1168	0.97485	16.1167	0.30855	16.117	0.1471	16.117	0.0907
16.1252	0.97895	16.125	0.30825	16.1253	0.1535	16.1253	0.0908
16.1335	0.9806	16.1333	0.3097	16.1337	0.16115	16.1337	0.09155
16.1418	0.98235	16.1417	0.30665	16.142	0.1712	16.142	0.09615
16.1502	0.98325	16.15	0.3103	16.1503	0.1794	16.1503	0.0964
16.1585	0.98085	16.1583	0.3127	16.1587	0.18625	16.1587	0.0993
16.1668	0.97895	16.1667	0.30905	16.167	0.19655	16.167	0.1046
16.1752	0.9782	16.175	0.3113	16.1753	0.20325	16.1753	0.10735
16.1835	0.97525	16.1833	0.30925	16.1837	0.21195	16.1837	0.1125
16.1918	0.97335	16.1917	0.30925	16.192	0.21865	16.192	0.1163
16.2002	0.96765	16.2	0.3103	16.2003	0.22655	16.2003	0.1206
16.2085	0.96425	16.2083	0.3098	16.2087	0.2315	16.2087	0.12385
16.2168	0.95995	16.2167	0.30805	16.217	0.2365	16.217	0.126
16.2252	0.95605	16.225	0.30725	16.2253	0.2427	16.2253	0.1283
16.2335	0.9509	16.2333	0.3084	16.2337	0.2492	16.2337	0.1352
16.2418	0.9469	16.2417	0.30795	16.242	0.25335	16.242	0.1355
16.2502	0.94185	16.25	0.3083	16.2503	0.25815	16.2503	0.13825
16.2585	0.9362	16.2583	0.30995	16.2587	0.26265	16.2587	0.1427
16.2668	0.9313	16.2667	0.30975	16.267	0.26925	16.267	0.14655
16.2752	0.92395	16.275	0.30815	16.2753	0.2733	16.2753	0.1481
16.2835	0.9168	16.2833	0.31075	16.2837	0.27865	16.2837	0.15165
16.2918	0.91285	16.2917	0.3077	16.292	0.2802	16.292	0.1546
16.3002	0.90885	16.3	0.31145	16.3003	0.28465	16.3003	0.15635
16.3085	0.90265	16.3083	0.3091	16.3087	0.29025	16.3087	0.159
16.3168	0.89685	16.3167	0.31	16.317	0.29435	16.317	0.16135
16.3252	0.88805	16.325	0.30865	16.3253	0.2983	16.3253	0.1639
16.3335	0.8831	16.3333	0.30885	16.3337	0.30255	16.3337	0.16435
16.3418	0.8772	16.3417	0.3102	16.342	0.30565	16.342	0.1648
16.3502	0.86735	16.35	0.30965	16.3503	0.3084	16.3503	0.1655
16.3585	0.8607	16.3583	0.3105	16.3587	0.3135	16.3587	0.1654
16.3668	0.8538	16.3667	0.30765	16.367	0.31845	16.367	0.16535
16.3752	0.84605	16.375	0.30925	16.3753	0.32025	16.3753	0.16595
16.3835	0.83935	16.3833	0.3096	16.3837	0.32455	16.3837	0.1634
16.3918	0.8318	16.3917	0.30705	16.392	0.3306	16.392	0.1647
16.4002	0.82305	16.4	0.3096	16.4003	0.33245	16.4003	0.1612
16.4085	0.8153	16.4083	0.30995	16.4087	0.33595	16.4087	0.161
16.4168	0.8067	16.4167	0.31	16.417	0.3401	16.417	0.1589
16.4252	0.7998	16.425	0.31035	16.4253	0.34425	16.4253	0.1578
16.4335	0.7929	16.4333	0.31015	16.4337	0.3465	16.4337	0.1558
16.4418	0.78625	16.4417	0.3116	16.442	0.3505	16.442	0.15435
16.4502	0.7817	16.45	0.3092	16.4503	0.35745	16.4503	0.15685
16.4585	0.7717	16.4583	0.31185	16.4587	0.3625	16.4587	0.1579
16.4668	0.7664	16.4667	0.3091	16.467	0.36945	16.467	0.16185
16.4752	0.75895	16.475	0.31045	16.4753	0.3773	16.4753	0.1668
16.4835	0.75405	16.4833	0.3097	16.4837	0.38625	16.4837	0.17755
16.4918	0.75035	16.4917	0.31135	16.492	0.39575	16.492	0.18675
16.5002	0.7445	16.5	0.3098	16.5003	0.40905	16.5003	0.20105
16.5085	0.73935	16.5083	0.31105	16.5087	0.42425	16.5087	0.2195
16.5168	0.73525	16.5167	0.31095	16.517	0.4442	16.517	0.24305
16.5252	0.73205	16.525	0.31105	16.5253	0.4645	16.5253	0.272
16.5335	0.72795	16.5333	0.30905	16.5337	0.49145	16.5337	0.30575
16.5418	0.72825	16.5417	0.30965	16.542	0.5243	16.542	0.34815
16.5502	0.7276	16.55	0.3096	16.5503	0.56175	16.5503	0.39495
16.5585	0.7248	16.5583	0.3113	16.5587	0.60585	16.5587	0.4492
16.5668	0.725	16.5667	0.3113	16.567	0.6569	16.567	0.511
16.5752	0.72305	16.575	0.3134	16.5753	0.71435	16.5753	0.57955
16.5835	0.7232	16.5833	0.3097	16.5837	0.77715	16.5837	0.6552
16.5918	0.72295	16.5917	0.3115	16.592	0.8523	16.592	0.7397
16.6002	0.7218	16.6	0.31285	16.6003	0.9353	16.6003	0.82975
16.6085	0.72335	16.6083	0.31325	16.6087	1.02215	16.6087	0.92705
16.6168	0.7262	16.6167	0.31345	16.617	1.11615	16.617	1.02655
16.6252	0.72605	16.625	0.31205	16.6253	1.2133	16.6253	1.1293
16.6335	0.7284	16.6333	0.31105	16.6337	1.31605	16.6337	1.2355
[truncated: 4,604 more rows]
