# Supplementary material for: A moonlighting function of a chitin polysaccharide monooxygenase, CWR-1, in Neurospora crassa allorecognition
Source: eLife. 2022 Aug 30;11:e80459. doi: 10.7554/eLife.80459 (PMC9550227; doi:10.7554/eLife.80459)
Supplement: Figure 4—source data 1. — Blank subtracted HPAEC-PAD traces. The samples were prepared as described in ‘Materials and methods.’ The time and nC response are listed in the table. [file elife-80459-fig4-data1.xlsx]

## Sheet: Sheet1
Figure 4A Source Data (α-chitin)
α-chitin		α-chitin + Asc.		HG1		HG2		HG3		HG4		HG5		HG6
time	nC	time	nC	time	nC	time	nC	time	nC	time	nC	time	nC	time	nC
0	-1.3579	0.000333	-1.66945	0.000333	-1.83745	0.000333	-1.84445	0.000167	-0.03625	0	-1.69135	0.000167	-1.9148	0	-1.86635
0.008333	-1.36735	0.008667	-1.67715	0.008667	-1.8438	0.008667	-1.8582	0.0085	-0.0587	0.008333	-1.6891	0.0085	-1.92295	0.008333	-1.8748
0.016667	-1.36675	0.017	-1.67525	0.017	-1.84215	0.017	-1.85135	0.016833	-0.06145	0.016667	-1.6923	0.016833	-1.9238	0.016667	-1.87055
0.025	-1.3672	0.025333	-1.6702	0.025333	-1.83605	0.025333	-1.84755	0.025167	-0.05315	0.025	-1.6915	0.025167	-1.9207	0.025	-1.86795
0.033333	-1.36545	0.033667	-1.66625	0.033667	-1.8317	0.033667	-1.844	0.0335	-0.0504	0.033333	-1.6883	0.0335	-1.91565	0.033333	-1.86335
0.041667	-1.36175	0.042	-1.66255	0.042	-1.82855	0.042	-1.8398	0.041833	-0.0495	0.041667	-1.6866	0.041833	-1.9151	0.041667	-1.86035
0.05	-1.36525	0.050333	-1.6635	0.050333	-1.82725	0.050333	-1.8404	0.050167	-0.04945	0.05	-1.68745	0.050167	-1.91405	0.05	-1.86135
0.058333	-1.3651	0.058667	-1.66345	0.058667	-1.82815	0.058667	-1.8395	0.0585	-0.0511	0.058333	-1.68755	0.0585	-1.9124	0.058333	-1.8612
0.066667	-1.36485	0.067	-1.6645	0.067	-1.8305	0.067	-1.8408	0.066833	-0.05155	0.066667	-1.6888	0.066833	-1.91535	0.066667	-1.8612
0.075	-1.3655	0.075333	-1.6634	0.075333	-1.83285	0.075333	-1.83945	0.075167	-0.04985	0.075	-1.69	0.075167	-1.91495	0.075	-1.86095
0.083333	-1.36415	0.083667	-1.6641	0.083667	-1.8316	0.083667	-1.8383	0.0835	-0.05035	0.083333	-1.6902	0.0835	-1.91355	0.083333	-1.8614
0.091667	-1.3648	0.092	-1.6638	0.092	-1.8318	0.092	-1.8394	0.091833	-0.05155	0.091667	-1.69005	0.091833	-1.91305	0.091667	-1.85915
0.1	-1.36395	0.100333	-1.66445	0.100333	-1.82865	0.100333	-1.83655	0.100167	-0.05055	0.1	-1.69015	0.100167	-1.9134	0.1	-1.85825
0.108333	-1.36365	0.108667	-1.6635	0.108667	-1.83105	0.108667	-1.83805	0.1085	-0.05	0.108333	-1.69015	0.1085	-1.91265	0.108333	-1.85935
0.116667	-1.36465	0.117	-1.6665	0.117	-1.8319	0.117	-1.83885	0.116833	-0.0494	0.116667	-1.69055	0.116833	-1.91465	0.116667	-1.8611
0.125	-1.36265	0.125333	-1.6626	0.125333	-1.82945	0.125333	-1.8355	0.125167	-0.0503	0.125	-1.68965	0.125167	-1.91215	0.125	-1.8564
0.133333	-1.36485	0.133667	-1.6633	0.133667	-1.83095	0.133667	-1.8364	0.1335	-0.0497	0.133333	-1.69145	0.1335	-1.913	0.133333	-1.8594
0.141667	-1.36255	0.142	-1.6632	0.142	-1.8305	0.142	-1.8361	0.141833	-0.05145	0.141667	-1.69175	0.141833	-1.9123	0.141667	-1.85735
0.15	-1.3622	0.150333	-1.66325	0.150333	-1.829	0.150333	-1.83525	0.150167	-0.0502	0.15	-1.68925	0.150167	-1.912	0.15	-1.85725
0.158333	-1.36475	0.158667	-1.66305	0.158667	-1.82965	0.158667	-1.83735	0.1585	-0.05075	0.158333	-1.69115	0.1585	-1.91085	0.158333	-1.8568
0.166667	-1.36165	0.167	-1.66185	0.167	-1.83105	0.167	-1.83655	0.166833	-0.05165	0.166667	-1.68965	0.166833	-1.9099	0.166667	-1.85525
0.175	-1.3637	0.175333	-1.6636	0.175333	-1.83065	0.175333	-1.83715	0.175167	-0.04795	0.175	-1.69115	0.175167	-1.90965	0.175	-1.8568
0.183333	-1.36235	0.183667	-1.6622	0.183667	-1.8282	0.183667	-1.8358	0.1835	-0.0484	0.183333	-1.68925	0.1835	-1.90805	0.183333	-1.85585
0.191667	-1.36395	0.192	-1.66065	0.192	-1.83005	0.192	-1.836	0.191833	-0.04815	0.191667	-1.6911	0.191833	-1.9079	0.191667	-1.85535
0.2	-1.3634	0.200333	-1.6621	0.200333	-1.8291	0.200333	-1.83725	0.200167	-0.0486	0.2	-1.6913	0.200167	-1.91025	0.2	-1.8546
0.208333	-1.3654	0.208667	-1.66315	0.208667	-1.82875	0.208667	-1.83745	0.2085	-0.0483	0.208333	-1.69575	0.2085	-1.9093	0.208333	-1.8554
0.216667	-1.3647	0.217	-1.6626	0.217	-1.8288	0.217	-1.8366	0.216833	-0.0493	0.216667	-1.69385	0.216833	-1.90835	0.216667	-1.85425
0.225	-1.36415	0.225333	-1.6632	0.225333	-1.82845	0.225333	-1.8357	0.225167	-0.0491	0.225	-1.69485	0.225167	-1.9075	0.225	-1.853
0.233333	-1.36555	0.233667	-1.66485	0.233667	-1.8314	0.233667	-1.83865	0.2335	-0.04905	0.233333	-1.69635	0.2335	-1.90965	0.233333	-1.85355
0.241667	-1.36725	0.242	-1.6638	0.242	-1.83	0.242	-1.83715	0.241833	-0.04865	0.241667	-1.69725	0.241833	-1.90875	0.241667	-1.854
0.25	-1.36335	0.250333	-1.66005	0.250333	-1.8264	0.250333	-1.83415	0.250167	-0.0484	0.25	-1.69215	0.250167	-1.90605	0.25	-1.85085
0.258333	-1.3645	0.258667	-1.6631	0.258667	-1.82635	0.258667	-1.83765	0.2585	-0.0478	0.258333	-1.6945	0.2585	-1.9069	0.258333	-1.8536
0.266667	-1.3633	0.267	-1.6615	0.267	-1.82695	0.267	-1.83565	0.266833	-0.0492	0.266667	-1.6935	0.266833	-1.90735	0.266667	-1.85205
0.275	-1.362	0.275333	-1.66135	0.275333	-1.824	0.275333	-1.8328	0.275167	-0.04725	0.275	-1.6918	0.275167	-1.90435	0.275	-1.8498
0.283333	-1.3623	0.283667	-1.6605	0.283667	-1.82515	0.283667	-1.8337	0.2835	-0.04845	0.283333	-1.69185	0.2835	-1.90525	0.283333	-1.84935
0.291667	-1.3641	0.292	-1.66235	0.292	-1.8266	0.292	-1.8362	0.291833	-0.0477	0.291667	-1.6929	0.291833	-1.90605	0.291667	-1.8526
0.3	-1.3638	0.300333	-1.6608	0.300333	-1.82635	0.300333	-1.83445	0.300167	-0.04905	0.3	-1.6938	0.300167	-1.9076	0.3	-1.85225
0.308333	-1.36545	0.308667	-1.6605	0.308667	-1.8282	0.308667	-1.83505	0.3085	-0.047	0.308333	-1.6937	0.3085	-1.90775	0.308333	-1.85145
0.316667	-1.36495	0.317	-1.66115	0.317	-1.82615	0.317	-1.83495	0.316833	-0.0478	0.316667	-1.69375	0.316833	-1.90685	0.316667	-1.8518
0.325	-1.3646	0.325333	-1.66225	0.325333	-1.82775	0.325333	-1.8344	0.325167	-0.0467	0.325	-1.6932	0.325167	-1.9081	0.325	-1.8536
0.333333	-1.36485	0.333667	-1.6608	0.333667	-1.82485	0.333667	-1.8337	0.3335	-0.04725	0.333333	-1.6934	0.3335	-1.9075	0.333333	-1.85175
0.341667	-1.3641	0.342	-1.66035	0.342	-1.82625	0.342	-1.83395	0.341833	-0.04795	0.341667	-1.69195	0.341833	-1.90685	0.341667	-1.85195
0.35	-1.3625	0.350333	-1.66215	0.350333	-1.82465	0.350333	-1.8348	0.350167	-0.05075	0.35	-1.6922	0.350167	-1.90595	0.35	-1.85175
0.358333	-1.36535	0.358667	-1.66145	0.358667	-1.8259	0.358667	-1.8356	0.3585	-0.0471	0.358333	-1.69245	0.3585	-1.9071	0.358333	-1.85295
0.366667	-1.36555	0.367	-1.6619	0.367	-1.82375	0.367	-1.8345	0.366833	-0.04815	0.366667	-1.68895	0.366833	-1.90395	0.366667	-1.8497
0.375	-1.36365	0.375333	-1.6597	0.375333	-1.82395	0.375333	-1.83585	0.375167	-0.0477	0.375	-1.6926	0.375167	-1.9037	0.375	-1.8501
0.383333	-1.36515	0.383667	-1.66155	0.383667	-1.82255	0.383667	-1.8354	0.3835	-0.0466	0.383333	-1.6945	0.3835	-1.9042	0.383333	-1.85135
0.391667	-1.36305	0.392	-1.66025	0.392	-1.82265	0.392	-1.83595	0.391833	-0.04655	0.391667	-1.69445	0.391833	-1.90315	0.391667	-1.84965
0.4	-1.36425	0.400333	-1.66235	0.400333	-1.8224	0.400333	-1.8387	0.400167	-0.0491	0.4	-1.69515	0.400167	-1.9042	0.4	-1.85125
0.408333	-1.36485	0.408667	-1.6629	0.408667	-1.8216	0.408667	-1.8368	0.4085	-0.04805	0.408333	-1.6947	0.4085	-1.90315	0.408333	-1.8506
0.416667	-1.36415	0.417	-1.6623	0.417	-1.81955	0.417	-1.83435	0.416833	-0.04855	0.416667	-1.69285	0.416833	-1.8997	0.416667	-1.8497
0.425	-1.36315	0.425333	-1.66225	0.425333	-1.8204	0.425333	-1.83445	0.425167	-0.04785	0.425	-1.6926	0.425167	-1.9024	0.425	-1.8498
0.433333	-1.36305	0.433667	-1.6643	0.433667	-1.82035	0.433667	-1.8345	0.4335	-0.04715	0.433333	-1.6928	0.4335	-1.9018	0.433333	-1.85115
0.441667	-1.36395	0.442	-1.6646	0.442	-1.82115	0.442	-1.8355	0.441833	-0.04735	0.441667	-1.6938	0.441833	-1.9026	0.441667	-1.8497
0.45	-1.36185	0.450333	-1.66205	0.450333	-1.81945	0.450333	-1.83375	0.450167	-0.04925	0.45	-1.69145	0.450167	-1.90055	0.45	-1.8486
0.458333	-1.3618	0.458667	-1.66245	0.458667	-1.82065	0.458667	-1.8329	0.4585	-0.04795	0.458333	-1.6912	0.4585	-1.90115	0.458333	-1.84835
0.466667	-1.3615	0.467	-1.6618	0.467	-1.8193	0.467	-1.8321	0.466833	-0.04825	0.466667	-1.6911	0.466833	-1.90025	0.466667	-1.8477
0.475	-1.3604	0.475333	-1.65865	0.475333	-1.81655	0.475333	-1.83105	0.475167	-0.0487	0.475	-1.68915	0.475167	-1.8985	0.475	-1.84395
0.483333	-1.35985	0.483667	-1.65785	0.483667	-1.816	0.483667	-1.83115	0.4835	-0.04695	0.483333	-1.687	0.4835	-1.8985	0.483333	-1.8453
0.491667	-1.3625	0.492	-1.6591	0.492	-1.8186	0.492	-1.83205	0.491833	-0.0484	0.491667	-1.6894	0.491833	-1.89845	0.491667	-1.84685
0.5	-1.36185	0.500333	-1.65855	0.500333	-1.81775	0.500333	-1.83115	0.500167	-0.04605	0.5	-1.6876	0.500167	-1.8981	0.5	-1.84555
0.508333	-1.3639	0.508667	-1.6602	0.508667	-1.81955	0.508667	-1.83245	0.5085	-0.0472	0.508333	-1.69095	0.5085	-1.9014	0.508333	-1.84755
0.516667	-1.3626	0.517	-1.6608	0.517	-1.81795	0.517	-1.8325	0.516833	-0.04585	0.516667	-1.6883	0.516833	-1.89955	0.516667	-1.8462
0.525	-1.3628	0.525333	-1.6622	0.525333	-1.8174	0.525333	-1.8348	0.525167	-0.0463	0.525	-1.6911	0.525167	-1.90185	0.525	-1.84715
0.533333	-1.3625	0.533667	-1.66395	0.533667	-1.82015	0.533667	-1.8343	0.5335	-0.04725	0.533333	-1.69055	0.5335	-1.90145	0.533333	-1.8488
0.541667	-1.3634	0.542	-1.66385	0.542	-1.81605	0.542	-1.8343	0.541833	-0.0486	0.541667	-1.69095	0.541833	-1.90295	0.541667	-1.8483
0.55	-1.3616	0.550333	-1.6607	0.550333	-1.8171	0.550333	-1.8317	0.550167	-0.0474	0.55	-1.6873	0.550167	-1.89965	0.55	-1.8479
0.558333	-1.36275	0.558667	-1.6626	0.558667	-1.8179	0.558667	-1.8327	0.5585	-0.04665	0.558333	-1.68965	0.5585	-1.8991	0.558333	-1.8476
0.566667	-1.3615	0.567	-1.6588	0.567	-1.8159	0.567	-1.83205	0.566833	-0.04745	0.566667	-1.68725	0.566833	-1.89655	0.566667	-1.8465
0.575	-1.363	0.575333	-1.66275	0.575333	-1.81575	0.575333	-1.8327	0.575167	-0.0467	0.575	-1.68735	0.575167	-1.89895	0.575	-1.8492
0.583333	-1.36245	0.583667	-1.66165	0.583667	-1.8164	0.583667	-1.8316	0.5835	-0.04605	0.583333	-1.68775	0.5835	-1.89895	0.583333	-1.84825
0.591667	-1.3625	0.592	-1.65895	0.592	-1.8161	0.592	-1.83055	0.591833	-0.0478	0.591667	-1.6865	0.591833	-1.8976	0.591667	-1.8462
0.6	-1.36405	0.600333	-1.66175	0.600333	-1.8199	0.600333	-1.8349	0.600167	-0.04855	0.6	-1.68905	0.600167	-1.8987	0.6	-1.8486
0.608333	-1.3642	0.608667	-1.66115	0.608667	-1.81985	0.608667	-1.8344	0.6085	-0.0471	0.608333	-1.68625	0.6085	-1.89865	0.608333	-1.8466
0.616667	-1.36065	0.617	-1.6601	0.617	-1.8167	0.617	-1.83175	0.616833	-0.047	0.616667	-1.685	0.616833	-1.89435	0.616667	-1.84425
0.625	-1.35975	0.625333	-1.6603	0.625333	-1.81555	0.625333	-1.83015	0.625167	-0.0483	0.625	-1.6834	0.625167	-1.89465	0.625	-1.846
0.633333	-1.35865	0.633667	-1.6595	0.633667	-1.81605	0.633667	-1.8292	0.6335	-0.04815	0.633333	-1.68325	0.6335	-1.8943	0.633333	-1.84445
0.641667	-1.35985	0.642	-1.66145	0.642	-1.81635	0.642	-1.82985	0.641833	-0.04735	0.641667	-1.6857	0.641833	-1.8948	0.641667	-1.8455
0.65	-1.3598	0.650333	-1.6582	0.650333	-1.8134	0.650333	-1.82935	0.650167	-0.0486	0.65	-1.68245	0.650167	-1.89415	0.65	-1.8429
0.658333	-1.35975	0.658667	-1.6585	0.658667	-1.81505	0.658667	-1.8274	0.6585	-0.0475	0.658333	-1.6808	0.6585	-1.89355	0.658333	-1.84555
0.666667	-1.35885	0.667	-1.6595	0.667	-1.81535	0.667	-1.8293	0.666833	-0.0477	0.666667	-1.68145	0.666833	-1.89445	0.666667	-1.84385
0.675	-1.3597	0.675333	-1.6608	0.675333	-1.8154	0.675333	-1.8291	0.675167	-0.04725	0.675	-1.6832	0.675167	-1.8952	0.675	-1.8449
0.683333	-1.35975	0.683667	-1.6589	0.683667	-1.81445	0.683667	-1.82975	0.6835	-0.04975	0.683333	-1.6839	0.6835	-1.8945	0.683333	-1.84605
0.691667	-1.35915	0.692	-1.65985	0.692	-1.81355	0.692	-1.8299	0.691833	-0.04855	0.691667	-1.6809	0.691833	-1.8943	0.691667	-1.84425
0.7	-1.35905	0.700333	-1.6602	0.700333	-1.8141	0.700333	-1.82905	0.700167	-0.04945	0.7	-1.68235	0.700167	-1.89415	0.7	-1.8452
0.708333	-1.35805	0.708667	-1.6605	0.708667	-1.81315	0.708667	-1.8296	0.7085	-0.0466	0.708333	-1.6821	0.7085	-1.894	0.708333	-1.84355
0.716667	-1.36065	0.717	-1.66175	0.717	-1.81675	0.717	-1.82975	0.716833	-0.048	0.716667	-1.6836	0.716833	-1.8964	0.716667	-1.84675
0.725	-1.36005	0.725333	-1.66165	0.725333	-1.81555	0.725333	-1.8287	0.725167	-0.0497	0.725	-1.6822	0.725167	-1.8936	0.725	-1.8453
0.733333	-1.3605	0.733667	-1.66265	0.733667	-1.81525	0.733667	-1.82905	0.7335	-0.0484	0.733333	-1.6826	0.7335	-1.89375	0.733333	-1.84575
0.741667	-1.3594	0.742	-1.66075	0.742	-1.8141	0.742	-1.82865	0.741833	-0.04785	0.741667	-1.68185	0.741833	-1.8932	0.741667	-1.84275
0.75	-1.3601	0.750333	-1.6611	0.750333	-1.812	0.750333	-1.8273	0.750167	-0.048	0.75	-1.68135	0.750167	-1.89265	0.75	-1.8444
0.758333	-1.35955	0.758667	-1.6624	0.758667	-1.81375	0.758667	-1.8261	0.7585	-0.04705	0.758333	-1.681	0.7585	-1.8921	0.758333	-1.8432
0.766667	-1.35925	0.767	-1.66045	0.767	-1.81225	0.767	-1.8253	0.766833	-0.04645	0.766667	-1.679	0.766833	-1.8908	0.766667	-1.8419
0.775	-1.35905	0.775333	-1.6614	0.775333	-1.8135	0.775333	-1.82635	0.775167	-0.04825	0.775	-1.681	0.775167	-1.8911	0.775	-1.8445
0.783333	-1.35775	0.783667	-1.6619	0.783667	-1.81175	0.783667	-1.82585	0.7835	-0.0469	0.783333	-1.67905	0.7835	-1.8913	0.783333	-1.8404
0.791667	-1.3575	0.792	-1.66155	0.792	-1.81355	0.792	-1.8248	0.791833	-0.0494	0.791667	-1.679	0.791833	-1.8921	0.791667	-1.8404
0.8	-1.3568	0.800333	-1.6633	0.800333	-1.81385	0.800333	-1.8237	0.800167	-0.04775	0.8	-1.67825	0.800167	-1.88975	0.8	-1.84095
0.808333	-1.3572	0.808667	-1.66205	0.808667	-1.8126	0.808667	-1.8242	0.8085	-0.04875	0.808333	-1.67865	0.8085	-1.89035	0.808333	-1.83995
0.816667	-1.35725	0.817	-1.6613	0.817	-1.81165	0.817	-1.82405	0.816833	-0.0467	0.816667	-1.67675	0.816833	-1.88975	0.816667	-1.8407
0.825	-1.35745	0.825333	-1.66075	0.825333	-1.81115	0.825333	-1.82285	0.825167	-0.0476	0.825	-1.6752	0.825167	-1.88855	0.825	-1.83755
0.833333	-1.35905	0.833667	-1.6628	0.833667	-1.81025	0.833667	-1.82405	0.8335	-0.04785	0.833333	-1.67805	0.8335	-1.8887	0.833333	-1.84075
0.841667	-1.36005	0.842	-1.66125	0.842	-1.81035	0.842	-1.8223	0.841833	-0.04795	0.841667	-1.6764	0.841833	-1.88805	0.841667	-1.8382
0.85	-1.3576	0.850333	-1.6614	0.850333	-1.8095	0.850333	-1.82065	0.850167	-0.0477	0.85	-1.6756	0.850167	-1.885	0.85	-1.83705
0.858333	-1.3588	0.858667	-1.6631	0.858667	-1.81185	0.858667	-1.82335	0.8585	-0.04745	0.858333	-1.67815	0.8585	-1.88925	0.858333	-1.83995
0.866667	-1.35735	0.867	-1.66115	0.867	-1.8091	0.867	-1.8191	0.866833	-0.04725	0.866667	-1.67435	0.866833	-1.88725	0.866667	-1.839
0.875	-1.3594	0.875333	-1.6622	0.875333	-1.8107	0.875333	-1.8219	0.875167	-0.0475	0.875	-1.67795	0.875167	-1.88975	0.875	-1.83935
0.883333	-1.3574	0.883667	-1.6619	0.883667	-1.81045	0.883667	-1.82105	0.8835	-0.04865	0.883333	-1.6772	0.8835	-1.88775	0.883333	-1.83785
0.891667	-1.3598	0.892	-1.6617	0.892	-1.8107	0.892	-1.82165	0.891833	-0.04735	0.891667	-1.67795	0.891833	-1.88915	0.891667	-1.8389
0.9	-1.3603	0.900333	-1.66205	0.900333	-1.81015	0.900333	-1.8226	0.900167	-0.04665	0.9	-1.6779	0.900167	-1.8895	0.9	-1.84025
0.908333	-1.3592	0.908667	-1.66445	0.908667	-1.8109	0.908667	-1.82265	0.9085	-0.049	0.908333	-1.67775	0.9085	-1.88745	0.908333	-1.8389
0.916667	-1.3574	0.917	-1.6603	0.917	-1.8092	0.917	-1.8197	0.916833	-0.04785	0.916667	-1.67565	0.916833	-1.8868	0.916667	-1.83845
0.925	-1.3578	0.925333	-1.6616	0.925333	-1.80895	0.925333	-1.8212	0.925167	-0.04775	0.925	-1.6762	0.925167	-1.88745	0.925	-1.83755
0.933333	-1.35935	0.933667	-1.66185	0.933667	-1.81085	0.933667	-1.8221	0.9335	-0.04855	0.933333	-1.67605	0.9335	-1.88765	0.933333	-1.8376
0.941667	-1.3582	0.942	-1.6624	0.942	-1.80855	0.942	-1.82135	0.941833	-0.0464	0.941667	-1.6759	0.941833	-1.88495	0.941667	-1.8385
0.95	-1.35835	0.950333	-1.6598	0.950333	-1.8068	0.950333	-1.8187	0.950167	-0.04645	0.95	-1.6731	0.950167	-1.88415	0.95	-1.83705
0.958333	-1.35825	0.958667	-1.66175	0.958667	-1.8068	0.958667	-1.81885	0.9585	-0.04635	0.958333	-1.6764	0.9585	-1.8851	0.958333	-1.83885
0.966667	-1.35865	0.967	-1.6611	0.967	-1.80695	0.967	-1.819	0.966833	-0.0481	0.966667	-1.6753	0.966833	-1.8848	0.966667	-1.83855
0.975	-1.35875	0.975333	-1.66275	0.975333	-1.808	0.975333	-1.81955	0.975167	-0.04805	0.975	-1.6765	0.975167	-1.8853	0.975	-1.8384
0.983333	-1.3562	0.983667	-1.6599	0.983667	-1.80685	0.983667	-1.81915	0.9835	-0.0479	0.983333	-1.67375	0.9835	-1.8841	0.983333	-1.83545
0.991667	-1.3569	0.992	-1.66	0.992	-1.80385	0.992	-1.8152	0.991833	-0.04865	0.991667	-1.67295	0.991833	-1.88155	0.991667	-1.8345
1	-1.3542	1.00033	-1.65925	1.00033	-1.8049	1.00033	-1.8148	1.00017	-0.0493	1	-1.6717	1.00017	-1.88265	1	-1.83435
1.00833	-1.3555	1.00867	-1.661	1.00867	-1.8068	1.00867	-1.8153	1.0085	-0.04765	1.00833	-1.6725	1.0085	-1.8823	1.00833	-1.8342
1.01667	-1.35585	1.017	-1.6608	1.017	-1.80605	1.017	-1.8174	1.01683	-0.04745	1.01667	-1.67195	1.01683	-1.8828	1.01667	-1.83305
1.025	-1.35525	1.02533	-1.66055	1.02533	-1.8046	1.02533	-1.815	1.02517	-0.04745	1.025	-1.6718	1.02517	-1.88145	1.025	-1.83205
1.03333	-1.3558	1.03367	-1.65965	1.03367	-1.80515	1.03367	-1.8137	1.0335	-0.04725	1.03333	-1.67065	1.0335	-1.8794	1.03333	-1.8338
1.04167	-1.3561	1.042	-1.6608	1.042	-1.80405	1.042	-1.81455	1.04183	-0.04745	1.04167	-1.67125	1.04183	-1.88105	1.04167	-1.8342
1.05	-1.3552	1.05033	-1.66055	1.05033	-1.8065	1.05033	-1.81485	1.05017	-0.04825	1.05	-1.67215	1.05017	-1.88205	1.05	-1.83535
1.05833	-1.35725	1.05867	-1.66005	1.05867	-1.80745	1.05867	-1.8143	1.0585	-0.0465	1.05833	-1.67265	1.0585	-1.88255	1.05833	-1.83425
1.06667	-1.35525	1.067	-1.66005	1.067	-1.8051	1.067	-1.81325	1.06683	-0.04665	1.06667	-1.6725	1.06683	-1.8817	1.06667	-1.8332
1.075	-1.3558	1.07533	-1.66235	1.07533	-1.8068	1.07533	-1.81405	1.07517	-0.0469	1.075	-1.6727	1.07517	-1.88375	1.075	-1.8357
1.08333	-1.3546	1.08367	-1.6612	1.08367	-1.80545	1.08367	-1.8118	1.0835	-0.04525	1.08333	-1.67145	1.0835	-1.88215	1.08333	-1.8328
1.09167	-1.35675	1.092	-1.6619	1.092	-1.8059	1.092	-1.81295	1.09183	-0.0456	1.09167	-1.67285	1.09183	-1.8813	1.09167	-1.8348
1.1	-1.35555	1.10033	-1.6607	1.10033	-1.8029	1.10033	-1.81385	1.10017	-0.0488	1.1	-1.67195	1.10017	-1.8807	1.1	-1.83385
1.10833	-1.35545	1.10867	-1.65965	1.10867	-1.8032	1.10867	-1.81295	1.1085	-0.0461	1.10833	-1.6704	1.1085	-1.88	1.10833	-1.8321
1.11667	-1.35745	1.117	-1.6621	1.117	-1.8039	1.117	-1.81455	1.11683	-0.0446	1.11667	-1.67465	1.11683	-1.88225	1.11667	-1.835
1.125	-1.35355	1.12533	-1.65975	1.12533	-1.80145	1.12533	-1.8113	1.12517	-0.04645	1.125	-1.6681	1.12517	-1.8785	1.125	-1.8295
1.13333	-1.35495	1.13367	-1.66175	1.13367	-1.80055	1.13367	-1.8108	1.1335	-0.0466	1.13333	-1.67035	1.1335	-1.8785	1.13333	-1.8316
1.14167	-1.35555	1.142	-1.66	1.142	-1.80275	1.142	-1.81275	1.14183	-0.0474	1.14167	-1.67225	1.14183	-1.8798	1.14167	-1.83325
1.15	-1.35565	1.15033	-1.6625	1.15033	-1.8027	1.15033	-1.8104	1.15017	-0.04705	1.15	-1.67235	1.15017	-1.87905	1.15	-1.8328
1.15833	-1.3533	1.15867	-1.66015	1.15867	-1.8002	1.15867	-1.81075	1.1585	-0.0468	1.15833	-1.66915	1.1585	-1.87675	1.15833	-1.82905
1.16667	-1.3551	1.167	-1.6587	1.167	-1.802	1.167	-1.8098	1.16683	-0.0466	1.16667	-1.6692	1.16683	-1.87635	1.16667	-1.8311
1.175	-1.3539	1.17533	-1.65875	1.17533	-1.80085	1.17533	-1.80895	1.17517	-0.04645	1.175	-1.66855	1.17517	-1.87695	1.175	-1.8293
1.18333	-1.35355	1.18367	-1.6593	1.18367	-1.80015	1.18367	-1.80955	1.1835	-0.04625	1.18333	-1.6689	1.1835	-1.8772	1.18333	-1.8315
1.19167	-1.35385	1.192	-1.65955	1.192	-1.8014	1.192	-1.8085	1.19183	-0.0475	1.19167	-1.6672	1.19183	-1.8755	1.19167	-1.83055
1.2	-1.3533	1.20033	-1.6594	1.20033	-1.8006	1.20033	-1.8099	1.20017	-0.0478	1.2	-1.6685	1.20017	-1.8747	1.2	-1.8307
1.20833	-1.354	1.20867	-1.6609	1.20867	-1.8014	1.20867	-1.8107	1.2085	-0.0455	1.20833	-1.66915	1.2085	-1.8769	1.20833	-1.8309
1.21667	-1.3526	1.217	-1.65935	1.217	-1.79975	1.217	-1.8087	1.21683	-0.047	1.21667	-1.66685	1.21683	-1.87435	1.21667	-1.8279
1.225	-1.35135	1.22533	-1.65835	1.22533	-1.7989	1.22533	-1.80725	1.22517	-0.0457	1.225	-1.6655	1.22517	-1.87565	1.225	-1.82775
1.23333	-1.3532	1.23367	-1.6583	1.23367	-1.7987	1.23367	-1.8074	1.2335	-0.04725	1.23333	-1.66645	1.2335	-1.8757	1.23333	-1.827
1.24167	-1.3511	1.242	-1.65945	1.242	-1.8004	1.242	-1.80645	1.24183	-0.04565	1.24167	-1.66625	1.24183	-1.8752	1.24167	-1.8279
1.25	-1.35475	1.25033	-1.66095	1.25033	-1.8	1.25033	-1.80825	1.25017	-0.04665	1.25	-1.6667	1.25017	-1.8757	1.25	-1.8301
1.25833	-1.35285	1.25867	-1.6593	1.25867	-1.79935	1.25867	-1.8083	1.2585	-0.04655	1.25833	-1.66655	1.2585	-1.8756	1.25833	-1.8293
1.26667	-1.3523	1.267	-1.65795	1.267	-1.7985	1.267	-1.80675	1.26683	-0.04545	1.26667	-1.66435	1.26683	-1.8736	1.26667	-1.82885
1.275	-1.35525	1.27533	-1.6592	1.27533	-1.7984	1.27533	-1.80595	1.27517	-0.0452	1.275	-1.6662	1.27517	-1.8766	1.275	-1.82935
1.28333	-1.35445	1.28367	-1.66035	1.28367	-1.80095	1.28367	-1.8093	1.2835	-0.0468	1.28333	-1.66635	1.2835	-1.87625	1.28333	-1.82915
1.29167	-1.35575	1.292	-1.6613	1.292	-1.7997	1.292	-1.8089	1.29183	-0.0465	1.29167	-1.66525	1.29183	-1.876	1.29167	-1.8291
1.3	-1.35595	1.30033	-1.65995	1.30033	-1.8013	1.30033	-1.8092	1.30017	-0.0461	1.3	-1.6653	1.30017	-1.8763	1.3	-1.8298
1.30833	-1.35575	1.30867	-1.65875	1.30867	-1.80145	1.30867	-1.80815	1.3085	-0.04555	1.30833	-1.6662	1.3085	-1.87635	1.30833	-1.8289
1.31667	-1.35305	1.317	-1.65685	1.317	-1.79985	1.317	-1.80705	1.31683	-0.04655	1.31667	-1.6649	1.31683	-1.87575	1.31667	-1.8283
1.325	-1.3544	1.32533	-1.6587	1.32533	-1.80055	1.32533	-1.80725	1.32517	-0.04455	1.325	-1.66445	1.32517	-1.87565	1.325	-1.82965
1.33333	-1.35605	1.33367	-1.65605	1.33367	-1.7987	1.33367	-1.8066	1.3335	-0.0456	1.33333	-1.66345	1.3335	-1.8733	1.33333	-1.82915
1.34167	-1.35655	1.342	-1.6594	1.342	-1.7994	1.342	-1.80715	1.34183	-0.04485	1.34167	-1.66365	1.34183	-1.8742	1.34167	-1.82895
1.35	-1.35575	1.35033	-1.65845	1.35033	-1.7991	1.35033	-1.8075	1.35017	-0.0458	1.35	-1.66395	1.35017	-1.87405	1.35	-1.829
1.35833	-1.3562	1.35867	-1.659	1.35867	-1.79845	1.35867	-1.8074	1.3585	-0.04695	1.35833	-1.6612	1.3585	-1.87525	1.35833	-1.82745
1.36667	-1.3541	1.367	-1.6571	1.367	-1.79625	1.367	-1.8044	1.36683	-0.0455	1.36667	-1.66095	1.36683	-1.8732	1.36667	-1.8254
1.375	-1.3545	1.37533	-1.65825	1.37533	-1.79765	1.37533	-1.80315	1.37517	-0.0463	1.375	-1.66125	1.37517	-1.87345	1.375	-1.82785
1.38333	-1.35445	1.38367	-1.6586	1.38367	-1.79885	1.38367	-1.80525	1.3835	-0.04435	1.38333	-1.6625	1.3835	-1.87445	1.38333	-1.8272
1.39167	-1.35485	1.392	-1.6583	1.392	-1.79665	1.392	-1.80395	1.39183	-0.04445	1.39167	-1.6639	1.39183	-1.8734	1.39167	-1.827
1.4	-1.3552	1.40033	-1.66085	1.40033	-1.8019	1.40033	-1.80785	1.40017	-0.04495	1.4	-1.6662	1.40017	-1.87715	1.4	-1.82925
1.40833	-1.35455	1.40867	-1.6591	1.40867	-1.7985	1.40867	-1.8044	1.4085	-0.04425	1.40833	-1.6642	1.4085	-1.87535	1.40833	-1.8278
1.41667	-1.35375	1.417	-1.65845	1.417	-1.7984	1.417	-1.8051	1.41683	-0.0466	1.41667	-1.66285	1.41683	-1.8751	1.41667	-1.82585
1.425	-1.3536	1.42533	-1.65835	1.42533	-1.798	1.42533	-1.80595	1.42517	-0.04545	1.425	-1.66155	1.42517	-1.87535	1.425	-1.82775
1.43333	-1.3533	1.43367	-1.6571	1.43367	-1.7944	1.43367	-1.80355	1.4335	-0.0449	1.43333	-1.66055	1.4335	-1.8731	1.43333	-1.82695
1.44167	-1.3565	1.442	-1.66045	1.442	-1.79705	1.442	-1.80745	1.44183	-0.04485	1.44167	-1.66215	1.44183	-1.8744	1.44167	-1.82775
1.45	-1.35455	1.45033	-1.65875	1.45033	-1.79715	1.45033	-1.8049	1.45017	-0.04505	1.45	-1.6626	1.45017	-1.8735	1.45	-1.8268
1.45833	-1.35475	1.45867	-1.65875	1.45867	-1.79615	1.45867	-1.8049	1.4585	-0.045	1.45833	-1.6626	1.4585	-1.8746	1.45833	-1.82815
1.46667	-1.3548	1.467	-1.6605	1.467	-1.7979	1.467	-1.80605	1.46683	-0.0439	1.46667	-1.663	1.46683	-1.8741	1.46667	-1.8299
1.475	-1.3546	1.47533	-1.66145	1.47533	-1.7967	1.47533	-1.80675	1.47517	-0.0462	1.475	-1.6619	1.47517	-1.8749	1.475	-1.8277
1.48333	-1.35395	1.48367	-1.65925	1.48367	-1.7968	1.48367	-1.80645	1.4835	-0.0451	1.48333	-1.66325	1.4835	-1.874	1.48333	-1.8272
1.49167	-1.35525	1.492	-1.6606	1.492	-1.7964	1.492	-1.80645	1.49183	-0.04365	1.49167	-1.66225	1.49183	-1.8744	1.49167	-1.8276
1.5	-1.35715	1.50033	-1.659	1.50033	-1.7958	1.50033	-1.80505	1.50017	-0.04415	1.5	-1.6643	1.50017	-1.87505	1.5	-1.82635
1.50833	-1.355	1.50867	-1.6585	1.50867	-1.7955	1.50867	-1.80415	1.5085	-0.04565	1.50833	-1.66545	1.5085	-1.87395	1.50833	-1.826
1.51667	-1.35475	1.517	-1.66	1.517	-1.79575	1.517	-1.8046	1.51683	-0.04485	1.51667	-1.6633	1.51683	-1.87675	1.51667	-1.8264
1.525	-1.356	1.52533	-1.66075	1.52533	-1.79725	1.52533	-1.8063	1.52517	-0.04675	1.525	-1.6649	1.52517	-1.87595	1.525	-1.82635
1.53333	-1.35625	1.53367	-1.6584	1.53367	-1.7963	1.53367	-1.80485	1.5335	-0.04645	1.53333	-1.6643	1.5335	-1.8751	1.53333	-1.82665
1.54167	-1.35415	1.542	-1.6583	1.542	-1.7958	1.542	-1.80465	1.54183	-0.04595	1.54167	-1.66195	1.54183	-1.87405	1.54167	-1.8257
1.55	-1.35625	1.55033	-1.65955	1.55033	-1.79655	1.55033	-1.8044	1.55017	-0.0453	1.55	-1.66535	1.55017	-1.87435	1.55	-1.8241
1.55833	-1.3525	1.55867	-1.65755	1.55867	-1.79595	1.55867	-1.80185	1.5585	-0.04495	1.55833	-1.66245	1.5585	-1.8724	1.55833	-1.824
1.56667	-1.3531	1.567	-1.6571	1.567	-1.79425	1.567	-1.8026	1.56683	-0.04515	1.56667	-1.66125	1.56683	-1.87365	1.56667	-1.82435
1.575	-1.35475	1.57533	-1.65695	1.57533	-1.79465	1.57533	-1.8026	1.57517	-0.0454	1.575	-1.66245	1.57517	-1.8735	1.575	-1.82315
1.58333	-1.35345	1.58367	-1.65655	1.58367	-1.7926	1.58367	-1.80155	1.5835	-0.04525	1.58333	-1.6617	1.5835	-1.8744	1.58333	-1.8229
1.59167	-1.3526	1.592	-1.6557	1.592	-1.7937	1.592	-1.801	1.59183	-0.0445	1.59167	-1.66185	1.59183	-1.8716	1.59167	-1.82295
1.6	-1.35345	1.60033	-1.6567	1.60033	-1.79345	1.60033	-1.8019	1.60017	-0.0465	1.6	-1.66085	1.60017	-1.8714	1.6	-1.8239
1.60833	-1.35305	1.60867	-1.65615	1.60867	-1.79385	1.60867	-1.8031	1.6085	-0.0448	1.60833	-1.6644	1.6085	-1.87345	1.60833	-1.82515
1.61667	-1.3517	1.617	-1.65755	1.617	-1.79415	1.617	-1.80295	1.61683	-0.04485	1.61667	-1.6621	1.61683	-1.87205	1.61667	-1.8246
1.625	-1.3562	1.62533	-1.65755	1.62533	-1.7961	1.62533	-1.80345	1.62517	-0.046	1.625	-1.6645	1.62517	-1.87375	1.625	-1.8265
1.63333	-1.35425	1.63367	-1.65805	1.63367	-1.79515	1.63367	-1.80245	1.6335	-0.0447	1.63333	-1.6627	1.6335	-1.87295	1.63333	-1.8261
1.64167	-1.35335	1.642	-1.65735	1.642	-1.79715	1.642	-1.80165	1.64183	-0.04325	1.64167	-1.66315	1.64183	-1.87425	1.64167	-1.8265
1.65	-1.3532	1.65033	-1.65635	1.65033	-1.79465	1.65033	-1.80275	1.65017	-0.0428	1.65	-1.6629	1.65017	-1.8735	1.65	-1.82635
1.65833	-1.3548	1.65867	-1.6586	1.65867	-1.79605	1.65867	-1.8015	1.6585	-0.04395	1.65833	-1.66295	1.6585	-1.87455	1.65833	-1.8267
1.66667	-1.3537	1.667	-1.6572	1.667	-1.79445	1.667	-1.8034	1.66683	-0.04515	1.66667	-1.6592	1.66683	-1.87425	1.66667	-1.82525
1.675	-1.35165	1.67533	-1.65755	1.67533	-1.7924	1.67533	-1.7995	1.67517	-0.0437	1.675	-1.6571	1.67517	-1.87225	1.675	-1.82625
1.68333	-1.3519	1.68367	-1.65615	1.68367	-1.79235	1.68367	-1.79905	1.6835	-0.0412	1.68333	-1.65735	1.6835	-1.8708	1.68333	-1.823
1.69167	-1.35355	1.692	-1.659	1.692	-1.79395	1.692	-1.79965	1.69183	-0.0435	1.69167	-1.66075	1.69183	-1.87195	1.69167	-1.82465
1.7	-1.3523	1.70033	-1.65985	1.70033	-1.79465	1.70033	-1.8003	1.70017	-0.04135	1.7	-1.6627	1.70017	-1.87225	1.7	-1.82635
1.70833	-1.352	1.70867	-1.6595	1.70867	-1.7963	1.70867	-1.79915	1.7085	-0.04235	1.70833	-1.66005	1.7085	-1.87235	1.70833	-1.8242
1.71667	-1.35085	1.717	-1.65955	1.717	-1.796	1.717	-1.8001	1.71683	-0.0438	1.71667	-1.66345	1.71683	-1.8731	1.71667	-1.82755
1.725	-1.3545	1.72533	-1.6608	1.72533	-1.7969	1.72533	-1.80215	1.72517	-0.04405	1.725	-1.66615	1.72517	-1.8729	1.725	-1.8288
1.73333	-1.35375	1.73367	-1.6603	1.73367	-1.79685	1.73367	-1.80025	1.7335	-0.0444	1.73333	-1.664	1.7335	-1.875	1.73333	-1.82695
1.74167	-1.3556	1.742	-1.6606	1.742	-1.79455	1.742	-1.7993	1.74183	-0.0442	1.74167	-1.6636	1.74183	-1.8726	1.74167	-1.82715
1.75	-1.3544	1.75033	-1.6592	1.75033	-1.7938	1.75033	-1.79945	1.75017	-0.0445	1.75	-1.6614	1.75017	-1.87285	1.75	-1.8261
1.75833	-1.351	1.75867	-1.6557	1.75867	-1.79235	1.75867	-1.7989	1.7585	-0.0453	1.75833	-1.65975	1.7585	-1.86955	1.75833	-1.82395
1.76667	-1.3518	1.767	-1.6569	1.767	-1.79445	1.767	-1.79875	1.76683	-0.0432	1.76667	-1.6603	1.76683	-1.8697	1.76667	-1.82375
1.775	-1.3525	1.77533	-1.6587	1.77533	-1.79455	1.77533	-1.7987	1.77517	-0.0439	1.775	-1.66215	1.77517	-1.8695	1.775	-1.82485
1.78333	-1.34965	1.78367	-1.65775	1.78367	-1.7929	1.78367	-1.79695	1.7835	-0.04455	1.78333	-1.66195	1.7835	-1.8692	1.78333	-1.8241
1.79167	-1.3493	1.792	-1.658	1.792	-1.79345	1.792	-1.7989	1.79183	-0.0435	1.79167	-1.6636	1.79183	-1.87025	1.79167	-1.82415
1.8	-1.3514	1.80033	-1.65755	1.80033	-1.7946	1.80033	-1.7981	1.80017	-0.0451	1.8	-1.66385	1.80017	-1.8716	1.8	-1.82405
1.80833	-1.35345	1.80867	-1.6596	1.80867	-1.7947	1.80867	-1.7982	1.8085	-0.0436	1.80833	-1.6636	1.8085	-1.8722	1.80833	-1.825
1.81667	-1.35115	1.817	-1.65785	1.817	-1.79355	1.817	-1.799	1.81683	-0.0431	1.81667	-1.6627	1.81683	-1.8708	1.81667	-1.82375
1.825	-1.35175	1.82533	-1.65845	1.82533	-1.7951	1.82533	-1.80005	1.82517	-0.0435	1.825	-1.6616	1.82517	-1.8715	1.825	-1.8243
1.83333	-1.35205	1.83367	-1.6588	1.83367	-1.7957	1.83367	-1.801	1.8335	-0.04175	1.83333	-1.6639	1.8335	-1.87345	1.83333	-1.825
1.84167	-1.35085	1.842	-1.65795	1.842	-1.79525	1.842	-1.80075	1.84183	-0.0442	1.84167	-1.66295	1.84183	-1.8724	1.84167	-1.82475
1.85	-1.35065	1.85033	-1.65895	1.85033	-1.7959	1.85033	-1.80165	1.85017	-0.0438	1.85	-1.66485	1.85017	-1.87205	1.85	-1.826
1.85833	-1.3507	1.85867	-1.6589	1.85867	-1.79425	1.85867	-1.799	1.8585	-0.0431	1.85833	-1.66135	1.8585	-1.87115	1.85833	-1.8245
1.86667	-1.35185	1.867	-1.65815	1.867	-1.79365	1.867	-1.7979	1.86683	-0.0438	1.86667	-1.66155	1.86683	-1.8722	1.86667	-1.8227
1.875	-1.3507	1.87533	-1.6575	1.87533	-1.7937	1.87533	-1.7984	1.87517	-0.0421	1.875	-1.6613	1.87517	-1.87135	1.875	-1.82155
1.88333	-1.3508	1.88367	-1.65945	1.88367	-1.7939	1.88367	-1.80015	1.8835	-0.0425	1.88333	-1.6622	1.8835	-1.8726	1.88333	-1.82405
1.89167	-1.3492	1.892	-1.6589	1.892	-1.7942	1.892	-1.79925	1.89183	-0.04175	1.89167	-1.66205	1.89183	-1.87	1.89167	-1.824
1.9	-1.34855	1.90033	-1.65775	1.90033	-1.79185	1.90033	-1.79815	1.90017	-0.04185	1.9	-1.66	1.90017	-1.8688	1.9	-1.82285
1.90833	-1.34735	1.90867	-1.6557	1.90867	-1.79295	1.90867	-1.79685	1.9085	-0.04335	1.90833	-1.65865	1.9085	-1.8675	1.90833	-1.8197
1.91667	-1.3473	1.917	-1.65705	1.917	-1.79365	1.917	-1.79735	1.91683	-0.04345	1.91667	-1.65945	1.91683	-1.86875	1.91667	-1.822
1.925	-1.34855	1.92533	-1.6568	1.92533	-1.7926	1.92533	-1.796	1.92517	-0.04505	1.925	-1.65855	1.92517	-1.86765	1.925	-1.82165
1.93333	-1.347	1.93367	-1.65625	1.93367	-1.79265	1.93367	-1.79635	1.9335	-0.0418	1.93333	-1.65595	1.9335	-1.86735	1.93333	-1.8201
1.94167	-1.3488	1.942	-1.6582	1.942	-1.79445	1.942	-1.7974	1.94183	-0.04295	1.94167	-1.6591	1.94183	-1.87075	1.94167	-1.82175
1.95	-1.3472	1.95033	-1.6564	1.95033	-1.79335	1.95033	-1.7957	1.95017	-0.0425	1.95	-1.6592	1.95017	-1.86715	1.95	-1.81985
1.95833	-1.34525	1.95867	-1.65615	1.95867	-1.79045	1.95867	-1.79405	1.9585	-0.04145	1.95833	-1.65765	1.9585	-1.86835	1.95833	-1.8184
1.96667	-1.3478	1.967	-1.6563	1.967	-1.7938	1.967	-1.7968	1.96683	-0.0422	1.96667	-1.6592	1.96683	-1.86785	1.96667	-1.8218
1.975	-1.3474	1.97533	-1.65785	1.97533	-1.7934	1.97533	-1.79545	1.97517	-0.0414	1.975	-1.65995	1.97517	-1.8684	1.975	-1.8217
1.98333	-1.34645	1.98367	-1.65555	1.98367	-1.7916	1.98367	-1.7969	1.9835	-0.04185	1.98333	-1.6581	1.9835	-1.86785	1.98333	-1.8207
1.99167	-1.3467	1.992	-1.65655	1.992	-1.79145	1.992	-1.7957	1.99183	-0.0398	1.99167	-1.65925	1.99183	-1.8674	1.99167	-1.8207
2	-1.34505	2.00033	-1.65405	2.00033	-1.7912	2.00033	-1.79435	2.00017	-0.0414	2	-1.65555	2.00017	-1.8655	2	-1.8193
2.00833	-1.3464	2.00867	-1.6552	2.00867	-1.79335	2.00867	-1.79505	2.0085	-0.0402	2.00833	-1.6584	2.0085	-1.86635	2.00833	-1.82095
2.01667	-1.34595	2.017	-1.6547	2.017	-1.7932	2.017	-1.7956	2.01683	-0.0403	2.01667	-1.6565	2.01683	-1.86685	2.01667	-1.8219
2.025	-1.3462	2.02533	-1.654	2.02533	-1.79285	2.02533	-1.7947	2.02517	-0.0403	2.025	-1.65685	2.02517	-1.8665	2.025	-1.81915
2.03333	-1.34545	2.03367	-1.65525	2.03367	-1.793	2.03367	-1.79445	2.0335	-0.0418	2.03333	-1.65625	2.0335	-1.86595	2.03333	-1.82005
2.04167	-1.34555	2.042	-1.6523	2.042	-1.79295	2.042	-1.79325	2.04183	-0.04285	2.04167	-1.6562	2.04183	-1.86485	2.04167	-1.8203
2.05	-1.3444	2.05033	-1.65475	2.05033	-1.79345	2.05033	-1.79315	2.05017	-0.04165	2.05	-1.65615	2.05017	-1.8639	2.05	-1.82
2.05833	-1.3491	2.05867	-1.6574	2.05867	-1.79515	2.05867	-1.79545	2.0585	-0.0417	2.05833	-1.65815	2.0585	-1.8664	2.05833	-1.8217
2.06667	-1.3468	2.067	-1.65705	2.067	-1.79335	2.067	-1.79615	2.06683	-0.04725	2.06667	-1.6559	2.06683	-1.8659	2.06667	-1.82195
2.075	-1.35355	2.07533	-1.66215	2.07533	-1.7958	2.07533	-1.8031	2.07517	-0.06145	2.075	-1.65875	2.07517	-1.87175	2.075	-1.8253
2.08333	-1.3699	2.08367	-1.6782	2.08367	-1.81045	2.08367	-1.82765	2.0835	-0.0951	2.08333	-1.6751	2.0835	-1.89075	2.08333	-1.84355
2.09167	-1.40295	2.092	-1.71425	2.092	-1.84995	2.092	-1.87755	2.09183	-0.15645	2.09167	-1.71405	2.09183	-1.93015	2.09167	-1.8805
2.1	-1.44565	2.10033	-1.7665	2.10033	-1.91855	2.10033	-1.9484	2.10017	-0.2279	2.1	-1.77795	2.10017	-1.98925	2.1	-1.92715
2.10833	-1.48455	2.10867	-1.81255	2.10867	-2.00245	2.10867	-2.0228	2.1085	-0.2983	2.10833	-1.8497	2.1085	-2.0435	2.10833	-1.9627
2.11667	-1.4887	2.117	-1.8258	2.117	-2.06215	2.117	-2.0627	2.11683	-0.3431	2.11667	-1.8862	2.11683	-2.06245	2.11667	-1.9614
2.125	-1.4483	2.12533	-1.7972	2.12533	-2.0543	2.12533	-2.05635	2.12517	-0.3602	2.125	-1.8504	2.12517	-2.02915	2.125	-1.9126
2.13333	-1.37355	2.13367	-1.73565	2.13367	-1.95835	2.13367	-2.00115	2.1335	-0.34975	2.13333	-1.7357	2.1335	-1.9427	2.13333	-1.8266
2.14167	-1.28335	2.142	-1.66505	2.142	-1.8049	2.142	-1.9034	2.14183	-0.3107	2.14167	-1.5811	2.14183	-1.8285	2.14167	-1.7272
2.15	-1.2125	2.15033	-1.61575	2.15033	-1.6626	2.15033	-1.76715	2.15017	-0.2308	2.15	-1.4498	2.15017	-1.71985	2.15	-1.64335
2.15833	-1.1582	2.15867	-1.5906	2.15867	-1.56655	2.15867	-1.5523	2.1585	-0.09015	2.15833	-1.3445	2.1585	-1.63335	2.15833	-1.56895
2.16667	-1.09725	2.167	-1.5477	2.167	-1.50105	2.167	-1.21215	2.16683	0.11795	2.16667	-1.18695	2.16683	-1.53985	2.16667	-1.46815
2.175	-1.0014	2.17533	-1.44785	2.17533	-1.4134	2.17533	-0.71305	2.17517	0.38355	2.175	-0.8745	2.17517	-1.40995	2.175	-1.28505
2.18333	-0.8612	2.18367	-1.2602	2.18367	-1.25035	2.18367	-0.0585	2.1835	0.70955	2.18333	-0.23635	2.1835	-1.2111	2.18333	-0.8839
2.19167	-0.6789	2.192	-0.9567	2.192	-0.9288	2.192	0.73035	2.19183	1.1207	2.19167	1.2972	2.19183	-0.9242	2.19167	0.059
2.2	-0.4602	2.20033	-0.5265	2.20033	-0.2432	2.20033	1.63625	2.20017	1.67455	2.2	5.1391	2.20017	-0.53105	2.2	2.09655
2.20833	-0.18875	2.20867	0.0331	2.20867	1.1763	2.20867	2.65355	2.2085	2.4322	2.20833	13.5785	2.2085	-0.01675	2.20833	5.8088
2.21667	0.14305	2.217	0.6932	2.217	3.7823	2.217	3.75515	2.21683	3.4125	2.21667	28.6932	2.21683	0.6083	2.21667	11.4313
2.225	0.5329	2.22533	1.40785	2.22533	7.87455	2.22533	4.8888	2.22517	4.5665	2.225	50.5082	2.22517	1.3067	2.225	18.6317
2.23333	0.94285	2.23367	2.09875	2.23367	13.2835	2.23367	5.96675	2.2335	5.7753	2.23333	75.7188	2.2335	2.00835	2.23333	26.5331
2.24167	1.3165	2.242	2.70065	2.242	19.1358	2.242	6.88755	2.24183	6.8934	2.24167	98.4172	2.24183	2.6397	2.24167	34.0362
2.25	1.60305	2.25033	3.15385	2.25033	24.0232	2.25033	7.5555	2.25017	7.77495	2.25	113.242	2.25017	3.1291	2.25	40.179
2.25833	1.76775	2.25867	3.43095	2.25867	26.827	2.25867	7.9161	2.2585	8.32165	2.25833	118.615	2.2585	3.4392	2.25833	44.374
2.26667	1.80225	2.267	3.5218	2.267	27.3806	2.267	7.9621	2.26683	8.5009	2.26667	117.184	2.26683	3.5607	2.26667	46.4613
2.275	1.72345	2.27533	3.4492	2.27533	26.288	2.27533	7.7221	2.27517	8.34085	2.275	111.049	2.27517	3.50525	2.275	46.5983
2.28333	1.5561	2.28367	3.23885	2.28367	24.305	2.28367	7.25765	2.2835	7.9137	2.28333	102.824	2.2835	3.3104	2.28333	45.151
2.29167	1.33805	2.292	2.93565	2.292	21.9705	2.292	6.64095	2.29183	7.3112	2.29167	94.1516	2.29183	3.0186	2.29167	42.5486
2.3	1.09355	2.30033	2.57675	2.30033	19.5389	2.30033	5.93985	2.30017	6.61535	2.3	85.4458	2.30017	2.67045	2.3	39.2
2.30833	0.8509	2.30867	2.2017	2.30867	17.1245	2.30867	5.2147	2.3085	5.8931	2.30833	76.7572	2.3085	2.30055	2.30833	35.4572
2.31667	0.62425	2.317	1.838	2.317	14.7953	2.317	4.51615	2.31683	5.19175	2.31667	68.1962	2.31683	1.94415	2.31667	31.5877
2.325	0.43385	2.32533	1.51995	2.32533	12.6294	2.32533	3.8928	2.32517	4.54975	2.325	59.9977	2.32517	1.6249	2.325	27.8091
2.33333	0.29495	2.33367	1.27755	2.33367	10.6874	2.33367	3.3709	2.3335	3.99955	2.33333	52.3907	2.3335	1.3691	2.33333	24.2747
2.34167	0.216	2.342	1.1249	2.342	9.00835	2.342	2.9687	2.34183	3.5583	2.34167	45.5335	2.34183	1.1879	2.34167	21.0855
2.35	0.1915	2.35033	1.0613	2.35033	7.59925	2.35033	2.6794	2.35017	3.2453	2.35	39.5147	2.35017	1.08355	2.35	18.2787
2.35833	0.2144	2.35867	1.0767	2.35867	6.45235	2.35867	2.4791	2.3585	3.05265	2.35833	34.3526	2.3585	1.04825	2.35833	15.8723
2.36667	0.2625	2.367	1.13855	2.367	5.5336	2.367	2.33895	2.36683	2.96175	2.36667	29.9911	2.36683	1.05025	2.36667	13.83
2.375	0.32085	2.37533	1.22115	2.37533	4.80475	2.37533	2.2343	2.37517	2.9363	2.375	25.869	2.37517	1.0823	2.375	12.1168
2.38333	0.37125	2.38367	1.29625	2.38367	4.20765	2.38367	2.13845	2.3835	2.94345	2.38333	22.4795	2.3835	1.1117	2.38333	10.6735
2.39167	0.40085	2.392	1.34365	2.392	3.6935	2.392	2.03895	2.39183	2.94965	2.39167	19.8141	2.39183	1.1235	2.39167	9.45225
2.4	0.40955	2.40033	1.35625	2.40033	3.23105	2.40033	1.9258	2.40017	2.93395	2.4	17.5498	2.40017	1.11215	2.4	8.4046
2.40833	0.38905	2.40867	1.325	2.40867	2.80495	2.40867	1.79395	2.4085	2.8878	2.40833	15.5836	2.4085	1.066	2.40833	7.4891
2.41667	0.345	2.417	1.25805	2.417	2.41555	2.417	1.6428	2.41683	2.809	2.41667	13.8619	2.41683	0.99315	2.41667	6.67795
2.425	0.2797	2.42533	1.15665	2.42533	2.055	2.42533	1.4737	2.42517	2.702	2.425	12.3425	2.42517	0.8902	2.425	5.95015
2.43333	0.2004	2.43367	1.02925	2.43367	1.7256	2.43367	1.29425	2.4335	2.5718	2.43333	10.9966	2.4335	0.7621	2.43333	5.28305
2.44167	0.1102	2.442	0.8837	2.442	1.42225	2.442	1.10825	2.44183	2.425	2.44167	9.7999	2.44183	0.61865	2.44167	4.67825
2.45	0.01485	2.45033	0.7302	2.45033	1.1441	2.45033	0.9212	2.45017	2.27065	2.45	8.73725	2.45017	0.4685	2.45	4.12695
2.45833	-0.0835	2.45867	0.56895	2.45867	0.88695	2.45867	0.7364	2.4585	2.1106	2.45833	7.79415	2.4585	0.3122	2.45833	3.62125
2.46667	-0.17985	2.467	0.4133	2.467	0.65685	2.467	0.5566	2.46683	1.95455	2.46667	6.96265	2.46683	0.15915	2.46667	3.16505
2.475	-0.26915	2.47533	0.262	2.47533	0.44895	2.47533	0.3926	2.47517	1.8054	2.475	6.22785	2.47517	0.01495	2.475	2.7542
2.48333	-0.3502	2.48367	0.12065	2.48367	0.26505	2.48367	0.23835	2.4835	1.6655	2.48333	5.58385	2.4835	-0.12245	2.48333	2.3846
2.49167	-0.425	2.492	-0.00915	2.492	0.1016	2.492	0.10055	2.49183	1.5381	2.49167	5.01485	2.49183	-0.24715	2.49167	2.0562
2.5	-0.48885	2.50033	-0.12575	2.50033	-0.04045	2.50033	-0.02035	2.50017	1.42245	2.5	4.5133	2.50017	-0.35825	2.5	1.7674
2.50833	-0.54595	2.50867	-0.23105	2.50867	-0.16805	2.50867	-0.1279	2.5085	1.31925	2.50833	4.0648	2.5085	-0.4624	2.50833	1.5086
2.51667	-0.5936	2.517	-0.32275	2.517	-0.27695	2.517	-0.2158	2.51683	1.2288	2.51667	3.6675	2.51683	-0.54955	2.51667	1.28215
2.525	-0.6369	2.52533	-0.4061	2.52533	-0.37595	2.52533	-0.291	2.52517	1.1484	2.525	3.31275	2.52517	-0.62905	2.525	1.07875
2.53333	-0.6766	2.53367	-0.4791	2.53367	-0.46145	2.53367	-0.35195	2.5335	1.0789	2.53333	2.99785	2.5335	-0.70105	2.53333	0.90025
2.54167	-0.70955	2.542	-0.5407	2.542	-0.53575	2.542	-0.40125	2.54183	1.0215	2.54167	2.7246	2.54183	-0.76185	2.54167	0.74415
2.55	-0.73725	2.55033	-0.59285	2.55033	-0.6	2.55033	-0.4428	2.55017	0.97245	2.55	2.48075	2.55017	-0.8112	2.55	0.6077
2.55833	-0.76365	2.55867	-0.6336	2.55867	-0.6573	2.55867	-0.4752	2.5585	0.93045	2.55833	2.26275	2.5585	-0.8541	2.55833	0.49115
2.56667	-0.78595	2.567	-0.6642	2.567	-0.7048	2.567	-0.4985	2.56683	0.89785	2.56667	2.0678	2.56683	-0.88695	2.56667	0.3912
2.575	-0.80885	2.57533	-0.6924	2.57533	-0.75045	2.57533	-0.52505	2.57517	0.87505	2.575	1.8883	2.57517	-0.91705	2.575	0.30005
2.58333	-0.8287	2.58367	-0.71045	2.58367	-0.78765	2.58367	-0.5453	2.5835	0.8593	2.58333	1.7251	2.5835	-0.9415	2.58333	0.22015
2.59167	-0.84855	2.592	-0.7296	2.592	-0.8251	2.592	-0.5699	2.59183	0.84845	2.59167	1.5732	2.59183	-0.96465	2.59167	0.1464
2.6	-0.86225	2.60033	-0.7445	2.60033	-0.85445	2.60033	-0.5933	2.60017	0.8415	2.6	1.43485	2.60017	-0.9839	2.6	0.0806
2.60833	-0.8817	2.60867	-0.7651	2.60867	-0.8905	2.60867	-0.6185	2.6085	0.83675	2.60833	1.2997	2.6085	-1.0051	2.60833	0.01335
2.61667	-0.89665	2.617	-0.7836	2.617	-0.9219	2.617	-0.64275	2.61683	0.83075	2.61667	1.1732	2.61683	-1.02585	2.61667	-0.0514
2.625	-0.91095	2.62533	-0.80075	2.62533	-0.9515	2.62533	-0.66155	2.62517	0.8245	2.625	1.0582	2.62517	-1.04575	2.625	-0.1114
2.63333	-0.92545	2.63367	-0.82035	2.63367	-0.98155	2.63367	-0.6753	2.6335	0.81395	2.63333	0.9475	2.6335	-1.06475	2.63333	-0.1728
2.64167	-0.9358	2.642	-0.839	2.642	-1.0089	2.642	-0.67905	2.64183	0.80325	2.64167	0.84735	2.64183	-1.0827	2.64167	-0.2274
2.65	-0.9464	2.65033	-0.8561	2.65033	-1.03665	2.65033	-0.67745	2.65017	0.7892	2.65	0.75	2.65017	-1.1	2.65	-0.28145
2.65833	-0.9539	2.65867	-0.8722	2.65867	-1.0654	2.65867	-0.67355	2.6585	0.77265	2.65833	0.66005	2.6585	-1.1131	2.65833	-0.3327
2.66667	-0.96355	2.667	-0.88625	2.667	-1.089	2.667	-0.66655	2.66683	0.7537	2.66667	0.57375	2.66683	-1.1248	2.66667	-0.38315
2.675	-0.9659	2.67533	-0.89695	2.67533	-1.1136	2.67533	-0.66475	2.67517	0.73235	2.675	0.49485	2.67517	-1.13115	2.675	-0.4269
2.68333	-0.9685	2.68367	-0.90275	2.68367	-1.1375	2.68367	-0.67025	2.6835	0.7061	2.68333	0.41825	2.6835	-1.1359	2.68333	-0.4694
2.69167	-0.9683	2.692	-0.90085	2.692	-1.15835	2.692	-0.68315	2.69183	0.68055	2.69167	0.35085	2.69183	-1.1406	2.69167	-0.50775
2.7	-0.96875	2.70033	-0.89515	2.70033	-1.18215	2.70033	-0.70455	2.70017	0.65385	2.7	0.2838	2.70017	-1.1484	2.7	-0.54735
2.70833	-0.96685	2.70867	-0.8803	2.70867	-1.19955	2.70867	-0.7232	2.7085	0.62815	2.70833	0.22235	2.7085	-1.15285	2.70833	-0.5833
2.71667	-0.96575	2.717	-0.85465	2.717	-1.2122	2.717	-0.7342	2.71683	0.60745	2.71667	0.16685	2.71683	-1.15705	2.71667	-0.6056
2.725	-0.9654	2.72533	-0.8131	2.72533	-1.2208	2.72533	-0.72495	2.72517	0.59255	2.725	0.11705	2.72517	-1.158	2.725	-0.6177
2.73333	-0.96315	2.73367	-0.746	2.73367	-1.21665	2.73367	-0.68525	2.7335	0.5915	2.73333	0.0777	2.7335	-1.1464	2.73333	-0.60705
2.74167	-0.9628	2.742	-0.6524	2.742	-1.1981	2.742	-0.60585	2.74183	0.61775	2.74167	0.05225	2.74183	-1.12455	2.74167	-0.5708
2.75	-0.9612	2.75033	-0.5235	2.75033	-1.1615	2.75033	-0.4809	2.75017	0.6707	2.75	0.04	2.75017	-1.0849	2.75	-0.5044
2.75833	-0.95855	2.75867	-0.3614	2.75867	-1.1065	2.75867	-0.3136	2.7585	0.76505	2.75833	0.04075	2.7585	-1.03005	2.75833	-0.4059
2.76667	-0.95445	2.767	-0.1672	2.767	-1.0358	2.767	-0.10585	2.76683	0.90045	2.76667	0.0589	2.76683	-0.95765	2.76667	-0.2806
2.775	-0.95315	2.77533	0.0449	2.77533	-0.95275	2.77533	0.123	2.77517	1.0777	2.775	0.0828	2.77517	-0.87545	2.775	-0.1367
2.78333	-0.9487	2.78367	0.2678	2.78367	-0.8626	2.78367	0.36675	2.7835	1.28975	2.78333	0.1134	2.7835	-0.7861	2.78333	0.01655
2.79167	-0.9468	2.792	0.48975	2.792	-0.77425	2.792	0.6147	2.79183	1.5244	2.79167	0.14145	2.79183	-0.6947	2.79167	0.17065
2.8	-0.94555	2.80033	0.6975	2.80033	-0.69195	2.80033	0.8495	2.80017	1.77335	2.8	0.16715	2.80017	-0.6064	2.8	0.31645
2.80833	-0.94425	2.80867	0.89085	2.80867	-0.6156	2.80867	1.06145	2.8085	2.01885	2.80833	0.1885	2.8085	-0.51855	2.80833	0.456
2.81667	-0.9476	2.817	1.05995	2.817	-0.5508	2.817	1.24355	2.81683	2.25265	2.81667	0.20305	2.81683	-0.4443	2.81667	0.5764
2.825	-0.95185	2.82533	1.20195	2.82533	-0.4971	2.82533	1.3977	2.82517	2.46255	2.825	0.21125	2.82517	-0.3819	2.825	0.67735
2.83333	-0.96085	2.83367	1.3127	2.83367	-0.45655	2.83367	1.5246	2.8335	2.6458	2.83333	0.212	2.8335	-0.33375	2.83333	0.75605
2.84167	-0.9635	2.842	1.4	2.842	-0.4231	2.842	1.6257	2.84183	2.7952	2.84167	0.21435	2.84183	-0.2879	2.84167	0.81945
2.85	-0.96755	2.85033	1.46395	2.85033	-0.3982	2.85033	1.69805	2.85017	2.91325	2.85	0.21	2.85017	-0.2547	2.85	0.8654
2.85833	-0.97525	2.85867	1.50765	2.85867	-0.37955	2.85867	1.74695	2.8585	3.00215	2.85833	0.1992	2.8585	-0.22935	2.85833	0.89495
2.86667	-0.9818	2.867	1.53135	2.867	-0.3711	2.867	1.77135	2.86683	3.0625	2.86667	0.18725	2.86683	-0.21005	2.86667	0.9112
2.875	-0.9908	2.87533	1.5354	2.87533	-0.3745	2.87533	1.77405	2.87517	3.09605	2.875	0.1673	2.87517	-0.2053	2.875	0.9095
2.88333	-1	2.88367	1.51935	2.88367	-0.3907	2.88367	1.75615	2.8835	3.1078	2.88333	0.13655	2.8835	-0.2101	2.88333	0.88915
2.89167	-1.0057	2.892	1.49205	2.892	-0.41	2.892	1.72995	2.89183	3.09595	2.89167	0.10365	2.89183	-0.22025	2.89167	0.8617
2.9	-1.01135	2.90033	1.45705	2.90033	-0.4285	2.90033	1.6952	2.90017	3.07	2.9	0.0766	2.90017	-0.23325	2.9	0.82845
2.90833	-1.0178	2.90867	1.4206	2.90867	-0.45095	2.90867	1.65925	2.9085	3.0306	2.90833	0.0494	2.9085	-0.2483	2.90833	0.78625
2.91667	-1.02255	2.917	1.3796	2.917	-0.47305	2.917	1.6183	2.91683	2.9866	2.91667	0.02955	2.91683	-0.264	2.91667	0.74485
2.925	-1.0254	2.92533	1.3363	2.92533	-0.49105	2.92533	1.57795	2.92517	2.9386	2.925	0.00895	2.92517	-0.27875	2.925	0.70085
2.93333	-1.0324	2.93367	1.2913	2.93367	-0.511	2.93367	1.5323	2.9335	2.89275	2.93333	-0.0115	2.9335	-0.29385	2.93333	0.65895
2.94167	-1.03805	2.942	1.2435	2.942	-0.53295	2.942	1.48325	2.94183	2.84805	2.94167	-0.0352	2.94183	-0.3111	2.94167	0.61255
2.95	-1.04415	2.95033	1.19245	2.95033	-0.55255	2.95033	1.4293	2.95017	2.80805	2.95	-0.06095	2.95017	-0.32935	2.95	0.56695
2.95833	-1.05105	2.95867	1.1364	2.95867	-0.57555	2.95867	1.3682	2.9585	2.76875	2.95833	-0.0913	2.9585	-0.35555	2.95833	0.52065
2.96667	-1.0563	2.967	1.082	2.967	-0.59745	2.967	1.30875	2.96683	2.72735	2.96667	-0.12315	2.96683	-0.37875	2.96667	0.4744
2.975	-1.06285	2.97533	1.02525	2.97533	-0.6202	2.97533	1.2469	2.97517	2.6802	2.975	-0.1542	2.97517	-0.40345	2.975	0.42765
2.98333	-1.0702	2.98367	0.9646	2.98367	-0.64245	2.98367	1.18535	2.9835	2.63385	2.98333	-0.18505	2.9835	-0.42815	2.98333	0.38105
2.99167	-1.0782	2.992	0.9017	2.992	-0.66585	2.992	1.12375	2.99183	2.5883	2.99167	-0.2176	2.99183	-0.45365	2.99167	0.3382
3	-1.0833	3.00033	0.849	3.00033	-0.68535	3.00033	1.06555	3.00017	2.5379	3	-0.24295	3.00017	-0.47355	3	0.2962
3.00833	-1.08815	3.00867	0.7961	3.00867	-0.7043	3.00867	1.01095	3.0085	2.4911	3.00833	-0.26675	3.0085	-0.4932	3.00833	0.2577
3.01667	-1.09415	3.017	0.74295	3.017	-0.7234	3.017	0.9577	3.01683	2.44435	3.01667	-0.2891	3.01683	-0.51195	3.01667	0.2195
3.025	-1.10045	3.02533	0.6921	3.02533	-0.7429	3.02533	0.9042	3.02517	2.40005	3.025	-0.3064	3.02517	-0.52745	3.025	0.18365
3.03333	-1.10505	3.03367	0.64685	3.03367	-0.75815	3.03367	0.8573	3.0335	2.35555	3.03333	-0.31745	3.0335	-0.53695	3.03333	0.1551
3.04167	-1.1092	3.042	0.6015	3.042	-0.7722	3.042	0.8113	3.04183	2.31745	3.04167	-0.324	3.04183	-0.5439	3.04167	0.1274
3.05	-1.11435	3.05033	0.55705	3.05033	-0.7854	3.05033	0.7659	3.05017	2.27795	3.05	-0.33045	3.05017	-0.55335	3.05	0.0998
3.05833	-1.11825	3.05867	0.51525	3.05867	-0.7986	3.05867	0.7186	3.0585	2.24055	3.05833	-0.3389	3.0585	-0.5587	3.05833	0.07265
3.06667	-1.1273	3.067	0.4687	3.067	-0.81605	3.067	0.66925	3.06683	2.20145	3.06667	-0.3541	3.06683	-0.5723	3.06667	0.0384
3.075	-1.1311	3.07533	0.4254	3.07533	-0.8313	3.07533	0.62285	3.07517	2.1629	3.075	-0.37535	3.07517	-0.58705	3.075	0.00525
3.08333	-1.13445	3.08367	0.38485	3.08367	-0.84665	3.08367	0.5784	3.0835	2.1282	3.08333	-0.3991	3.0835	-0.6019	3.08333	-0.0265
3.09167	-1.14095	3.092	0.3435	3.092	-0.8652	3.092	0.5343	3.09183	2.09405	3.09167	-0.4274	3.09183	-0.6226	3.09167	-0.0598
3.1	-1.1443	3.10033	0.30255	3.10033	-0.8804	3.10033	0.49245	3.10017	2.05845	3.1	-0.4574	3.10017	-0.6424	3.1	-0.0945
3.10833	-1.1489	3.10867	0.2638	3.10867	-0.89755	3.10867	0.4498	3.1085	2.0244	3.10833	-0.4874	3.1085	-0.6634	3.10833	-0.12975
3.11667	-1.15475	3.117	0.22545	3.117	-0.91545	3.117	0.40655	3.11683	1.9923	3.11667	-0.51815	3.11683	-0.68655	3.11667	-0.16345
3.125	-1.15845	3.12533	0.18905	3.12533	-0.93015	3.12533	0.37005	3.12517	1.96145	3.125	-0.54435	3.12517	-0.70685	3.125	-0.1934
3.13333	-1.1603	3.13367	0.1529	3.13367	-0.9459	3.13367	0.3336	3.1335	1.92865	3.13333	-0.5696	3.1335	-0.7272	3.13333	-0.2235
3.14167	-1.1621	3.142	0.1205	3.142	-0.9577	3.142	0.3016	3.14183	1.89835	3.14167	-0.5922	3.14183	-0.7432	3.14167	-0.2487
3.15	-1.1647	3.15033	0.08815	3.15033	-0.97375	3.15033	0.27225	3.15017	1.86985	3.15	-0.6132	3.15017	-0.76105	3.15	-0.273
3.15833	-1.16835	3.15867	0.05735	3.15867	-0.9858	3.15867	0.24875	3.1585	1.8408	3.15833	-0.6345	3.1585	-0.7779	3.15833	-0.2898
3.16667	-1.16915	3.167	0.03	3.167	-0.99795	3.167	0.23705	3.16683	1.8119	3.16667	-0.6498	3.16683	-0.79095	3.16667	-0.29305
3.175	-1.17015	3.17533	-0.00085	3.17533	-1.0091	3.17533	0.2337	3.17517	1.78635	3.175	-0.66735	3.17517	-0.80465	3.175	-0.282
3.18333	-1.17315	3.18367	-0.02905	3.18367	-1.025	3.18367	0.2418	3.1835	1.7614	3.18333	-0.6813	3.1835	-0.8164	3.18333	-0.2483
3.19167	-1.17375	3.192	-0.0547	3.192	-1.0346	3.192	0.26095	3.19183	1.7382	3.19167	-0.69355	3.19183	-0.82835	3.19167	-0.19085
3.2	-1.17445	3.20033	-0.08025	3.20033	-1.0454	3.20033	0.2888	3.20017	1.716	3.2	-0.7072	3.20017	-0.83975	3.2	-0.116
3.20833	-1.1782	3.20867	-0.1071	3.20867	-1.05775	3.20867	0.31625	3.2085	1.69295	3.20833	-0.7213	3.2085	-0.8504	3.20833	-0.0386
3.21667	-1.17885	3.217	-0.13195	3.217	-1.0673	3.217	0.3337	3.21683	1.6736	3.21667	-0.73175	3.21683	-0.8624	3.21667	0.0306
3.225	-1.18055	3.22533	-0.155	3.22533	-1.07645	3.22533	0.34585	3.22517	1.6527	3.225	-0.7435	3.22517	-0.87145	3.225	0.0802
3.23333	-1.1786	3.23367	-0.17415	3.23367	-1.08225	3.23367	0.34795	3.2335	1.63315	3.23333	-0.75165	3.2335	-0.8774	3.23333	0.1065
3.24167	-1.17955	3.242	-0.1943	3.242	-1.0922	3.242	0.3409	3.24183	1.614	3.24167	-0.76325	3.24183	-0.8871	3.24167	0.1018
3.25	-1.17745	3.25033	-0.21335	3.25033	-1.10395	3.25033	0.32765	3.25017	1.59235	3.25	-0.77255	3.25017	-0.89435	3.25	0.077
3.25833	-1.1759	3.25867	-0.2246	3.25867	-1.11085	3.25867	0.3184	3.2585	1.5711	3.25833	-0.779	3.2585	-0.9006	3.25833	0.03465
3.26667	-1.1762	3.267	-0.23605	3.267	-1.1206	3.267	0.3086	3.26683	1.54505	3.26667	-0.7874	3.26683	-0.9083	3.26667	-0.01935
3.275	-1.1702	3.27533	-0.24255	3.27533	-1.12835	3.27533	0.3103	3.27517	1.5204	3.275	-0.79065	3.27517	-0.91375	3.275	-0.07505
3.28333	-1.16565	3.28367	-0.243	3.28367	-1.13355	3.28367	0.3164	3.2835	1.49425	3.28333	-0.79195	3.2835	-0.91725	3.28333	-0.13185
3.29167	-1.1638	3.292	-0.2456	3.292	-1.1421	3.292	0.3219	3.29183	1.4667	3.29167	-0.7991	3.29183	-0.9226	3.29167	-0.1928
3.3	-1.15945	3.30033	-0.24695	3.30033	-1.1491	3.30033	0.33095	3.30017	1.43835	3.3	-0.80115	3.30017	-0.9264	3.3	-0.2468
3.30833	-1.1529	3.30867	-0.24475	3.30867	-1.1545	3.30867	0.3395	3.3085	1.41205	3.30833	-0.80515	3.3085	-0.93165	3.30833	-0.2971
3.31667	-1.14655	3.317	-0.24655	3.317	-1.1628	3.317	0.3424	3.31683	1.3844	3.31667	-0.80735	3.31683	-0.9355	3.31667	-0.3459
3.325	-1.1397	3.32533	-0.2465	3.32533	-1.16585	3.32533	0.3492	3.32517	1.3585	3.325	-0.812	3.32517	-0.937	3.325	-0.3904
3.33333	-1.13025	3.33367	-0.2477	3.33367	-1.1689	3.33367	0.35105	3.3335	1.3344	3.33333	-0.81255	3.3335	-0.9376	3.33333	-0.4261
3.34167	-1.11935	3.342	-0.2463	3.342	-1.17185	3.342	0.35435	3.34183	1.31045	3.34167	-0.81055	3.34183	-0.93635	3.34167	-0.4564
3.35	-1.108	3.35033	-0.2481	3.35033	-1.1762	3.35033	0.35475	3.35017	1.289	3.35	-0.8095	3.35017	-0.9343	3.35	-0.4832
3.35833	-1.09485	3.35867	-0.247	3.35867	-1.1752	3.35867	0.35155	3.3585	1.27265	3.35833	-0.80705	3.3585	-0.93035	3.35833	-0.50515
3.36667	-1.0845	3.367	-0.24905	3.367	-1.17685	3.367	0.34765	3.36683	1.25575	3.36667	-0.80605	3.36683	-0.92835	3.36667	-0.5239
3.375	-1.0714	3.37533	-0.2526	3.37533	-1.1778	3.37533	0.34045	3.37517	1.24135	3.375	-0.8057	3.37517	-0.9261	3.375	-0.544
3.38333	-1.07005	3.38367	-0.2635	3.38367	-1.18715	3.38367	0.3246	3.3835	1.22805	3.38333	-0.8184	3.3835	-0.9346	3.38333	-0.56735
3.39167	-1.0659	3.392	-0.27265	3.392	-1.192	3.392	0.31005	3.39183	1.21515	3.39167	-0.8268	3.39183	-0.93965	3.39167	-0.5907
3.4	-1.06545	3.40033	-0.28595	3.40033	-1.20015	3.40033	0.29015	3.40017	1.20145	3.4	-0.8399	3.40017	-0.95035	3.4	-0.61745
3.40833	-1.0707	3.40867	-0.3025	3.40867	-1.21025	3.40867	0.26945	3.4085	1.187	3.40833	-0.85685	3.4085	-0.96455	3.40833	-0.6432
3.41667	-1.07925	3.417	-0.32215	3.417	-1.2235	3.417	0.24625	3.41683	1.1715	3.41667	-0.8756	3.41683	-0.9817	3.41667	-0.67195
3.425	-1.08655	3.42533	-0.33965	3.42533	-1.23155	3.42533	0.22385	3.42517	1.1557	3.425	-0.89105	3.42517	-0.99655	3.425	-0.6969
3.43333	-1.0888	3.43367	-0.35175	3.43367	-1.2348	3.43367	0.20685	3.4335	1.1398	3.43333	-0.90095	3.4335	-1.0069	3.43333	-0.7167
3.44167	-1.0761	3.442	-0.348	3.442	-1.2239	3.442	0.2047	3.44183	1.1202	3.44167	-0.89635	3.44183	-1.00275	3.44167	-0.72055
3.45	-1.21045	3.45033	-0.49335	3.45033	-1.36145	3.45033	0.05785	3.45017	1.1014	3.45	-1.0359	3.45017	-1.14495	3.45	-0.86865
3.45833	-1.2016	3.45867	-0.49515	3.45867	-1.35655	3.45867	0.0508	3.4585	1.08135	3.45833	-1.0349	3.4585	-1.14345	3.45833	-0.8748
3.46667	-1.11885	3.467	-0.42275	3.467	-1.27605	3.467	0.11925	3.46683	1.0613	3.46667	-0.95905	3.46683	-1.0685	3.46667	-0.8056
3.475	-1.132	3.47533	-0.44495	3.47533	-1.2896	3.47533	0.09395	3.47517	1.04225	3.475	-0.97665	3.47517	-1.08835	3.475	-0.8305
3.48333	-1.14185	3.48367	-0.4658	3.48367	-1.30425	3.48367	0.0711	3.4835	1.02515	3.48333	-0.9941	3.4835	-1.10885	3.48333	-0.85455
3.49167	-1.1473	3.492	-0.4826	3.492	-1.315	3.492	0.0533	3.49183	1.0076	3.49167	-1.0074	3.49183	-1.1208	3.49167	-0.87275
3.5	-1.15355	3.50033	-0.4968	3.50033	-1.3226	3.50033	0.03495	3.50017	0.98915	3.5	-1.0177	3.50017	-1.1344	3.5	-0.88905
3.50833	-1.15785	3.50867	-0.51475	3.50867	-1.3338	3.50867	0.01905	3.5085	0.97035	3.50833	-1.02925	3.5085	-1.14565	3.50833	-0.90735
3.51667	-1.16285	3.517	-0.52865	3.517	-1.34	3.517	0.0025	3.51683	0.9544	3.51667	-1.0404	3.51683	-1.15725	3.51667	-0.9221
3.525	-1.16515	3.52533	-0.5412	3.52533	-1.34675	3.52533	-0.01015	3.52517	0.93975	3.525	-1.04855	3.52517	-1.16375	3.525	-0.9361
3.53333	-1.1695	3.53367	-0.5546	3.53367	-1.35485	3.53367	-0.02445	3.5335	0.92335	3.53333	-1.0568	3.5335	-1.17465	3.53333	-0.95115
3.54167	-1.1706	3.542	-0.5647	3.542	-1.35985	3.542	-0.0364	3.54183	0.90555	3.54167	-1.0633	3.54183	-1.1841	3.54167	-0.96395
3.55	-1.1721	3.55033	-0.57585	3.55033	-1.36545	3.55033	-0.04755	3.55017	0.896	3.55	-1.07105	3.55017	-1.1908	3.55	-0.97465
3.55833	-1.17305	3.55867	-0.5866	3.55867	-1.37135	3.55867	-0.059	3.5585	0.88015	3.55833	-1.07805	3.5585	-1.1996	3.55833	-0.98695
3.56667	-1.17665	3.567	-0.59855	3.567	-1.37505	3.567	-0.07075	3.56683	0.8667	3.56667	-1.0844	3.56683	-1.20615	3.56667	-0.99815
3.575	-1.1801	3.57533	-0.61135	3.57533	-1.38345	3.57533	-0.08145	3.57517	0.85495	3.575	-1.0941	3.57517	-1.21575	3.575	-1.01235
3.58333	-1.1815	3.58367	-0.62095	3.58367	-1.3885	3.58367	-0.09325	3.5835	0.8448	3.58333	-1.10105	3.5835	-1.2196	3.58333	-1.0206
3.59167	-1.1832	3.592	-0.6288	3.592	-1.39285	3.592	-0.10195	3.59183	0.8323	3.59167	-1.10795	3.59183	-1.2277	3.59167	-1.03
3.6	-1.1833	3.60033	-0.63865	3.60033	-1.3982	3.60033	-0.1094	3.60017	0.82065	3.6	-1.11315	3.60017	-1.2336	3.6	-1.03755
3.60833	-1.1861	3.60867	-0.64875	3.60867	-1.40275	3.60867	-0.11715	3.6085	0.80845	3.60833	-1.1199	3.6085	-1.2409	3.60833	-1.03765
3.61667	-1.18405	3.617	-0.65705	3.617	-1.4078	3.617	-0.1236	3.61683	0.79795	3.61667	-1.1254	3.61683	-1.24385	3.61667	-1.05425
3.625	-1.1863	3.62533	-0.6676	3.62533	-1.41125	3.62533	-0.1307	3.62517	0.7867	3.625	-1.1302	3.62517	-1.2515	3.625	-1.0623
3.63333	-1.1892	3.63367	-0.677	3.63367	-1.41725	3.63367	-0.1387	3.6335	0.77945	3.63333	-1.13665	3.6335	-1.2592	3.63333	-1.07065
3.64167	-1.1907	3.642	-0.68745	3.642	-1.42145	3.642	-0.1431	3.64183	0.77	3.64167	-1.14325	3.64183	-1.26575	3.64167	-1.07985
3.65	-1.19035	3.65033	-0.69575	3.65033	-1.42425	3.65033	-0.1485	3.65017	0.76015	3.65	-1.14915	3.65017	-1.2705	3.65	-1.0865
3.65833	-1.18825	3.65867	-0.6996	3.65867	-1.42645	3.65867	-0.14965	3.6585	0.75365	3.65833	-1.15095	3.6585	-1.2736	3.65833	-1.0909
3.66667	-1.19525	3.667	-0.71255	3.667	-1.4355	3.667	-0.1603	3.66683	0.7447	3.66667	-1.1616	3.66683	-1.2844	3.66667	-1.1044
3.675	-1.19645	3.67533	-0.7212	3.67533	-1.4383	3.67533	-0.16595	3.67517	0.7354	3.675	-1.16615	3.67517	-1.2897	3.675	-1.11195
3.68333	-1.1977	3.68367	-0.7284	3.68367	-1.4444	3.68367	-0.1743	3.6835	0.7268	3.68333	-1.1744	3.6835	-1.29615	3.68333	-1.1222
3.69167	-1.19555	3.692	-0.7359	3.692	-1.4452	3.692	-0.17985	3.69183	0.7204	3.69167	-1.1777	3.69183	-1.2997	3.69167	-1.1291
3.7	-1.19455	3.70033	-0.74135	3.70033	-1.44835	3.70033	-0.1895	3.70017	0.7134	3.7	-1.18255	3.70017	-1.30475	3.7	-1.1345
3.70833	-1.1966	3.70867	-0.7499	3.70867	-1.4509	3.70867	-0.20025	3.7085	0.7052	3.70833	-1.18835	3.7085	-1.31105	3.70833	-1.14255
3.71667	-1.19865	3.717	-0.75965	3.717	-1.4556	3.717	-0.21355	3.71683	0.69785	3.71667	-1.1967	3.71683	-1.317	3.71667	-1.1503
3.725	-1.1972	3.72533	-0.7632	3.72533	-1.45645	3.72533	-0.22435	3.72517	0.689	3.725	-1.198	3.72517	-1.3199	3.725	-1.15695
3.73333	-1.1996	3.73367	-0.7725	3.73367	-1.4608	3.73367	-0.2368	3.7335	0.681	3.73333	-1.2085	3.7335	-1.32655	3.73333	-1.1649
3.74167	-1.1988	3.742	-0.7791	3.742	-1.4637	3.742	-0.24735	3.74183	0.67575	3.74167	-1.21	3.74183	-1.3294	3.74167	-1.17015
3.75	-1.1965	3.75033	-0.78425	3.75033	-1.4651	3.75033	-0.25845	3.75017	0.66885	3.75	-1.21465	3.75017	-1.3339	3.75	-1.17585
3.75833	-1.19795	3.75867	-0.79205	3.75867	-1.4694	3.75867	-0.27025	3.7585	0.66335	3.75833	-1.2204	3.7585	-1.3368	3.75833	-1.18205
3.76667	-1.1968	3.767	-0.798	3.767	-1.4723	3.767	-0.2827	3.76683	0.65805	3.76667	-1.2254	3.76683	-1.3391	3.76667	-1.1877
3.775	-1.198	3.77533	-0.805	3.77533	-1.4735	3.77533	-0.2917	3.77517	0.6526	3.775	-1.22815	3.77517	-1.3442	3.775	-1.1928
3.78333	-1.19805	3.78367	-0.8104	3.78367	-1.4766	3.78367	-0.3031	3.7835	0.6468	3.78333	-1.23185	3.7835	-1.34585	3.78333	-1.198
3.79167	-1.19895	3.792	-0.81695	3.792	-1.48015	3.792	-0.31275	3.79183	0.64085	3.79167	-1.23615	3.79183	-1.34905	3.79167	-1.20535
3.8	-1.19905	3.80033	-0.82245	3.80033	-1.4802	3.80033	-0.3222	3.80017	0.635	3.8	-1.2392	3.80017	-1.35385	3.8	-1.21125
3.80833	-1.19915	3.80867	-0.83175	3.80867	-1.4857	3.80867	-0.33405	3.8085	0.6299	3.80833	-1.242	3.8085	-1.35795	3.80833	-1.21815
3.81667	-1.2003	3.817	-0.83605	3.817	-1.4883	3.817	-0.34235	3.81683	0.625	3.81667	-1.24605	3.81683	-1.36175	3.81667	-1.22355
3.825	-1.20105	3.82533	-0.8422	3.82533	-1.49135	3.82533	-0.3521	3.82517	0.6212	3.825	-1.2484	3.82517	-1.36575	3.825	-1.23075
3.83333	-1.2027	3.83367	-0.84725	3.83367	-1.49495	3.83367	-0.3613	3.8335	0.6158	3.83333	-1.25245	3.8335	-1.36915	3.83333	-1.2382
3.84167	-1.20305	3.842	-0.8541	3.842	-1.49855	3.842	-0.36845	3.84183	0.6121	3.84167	-1.257	3.84183	-1.37325	3.84167	-1.24335
3.85	-1.2021	3.85033	-0.85755	3.85033	-1.50125	3.85033	-0.37455	3.85017	0.6064	3.85	-1.2604	3.85017	-1.37545	3.85	-1.2455
3.85833	-1.20295	3.85867	-0.8607	3.85867	-1.5026	3.85867	-0.3824	3.8585	0.6012	3.85833	-1.26295	3.8585	-1.3792	3.85833	-1.2511
3.86667	-1.2007	3.867	-0.86275	3.867	-1.50385	3.867	-0.3846	3.86683	0.5979	3.86667	-1.2627	3.86683	-1.38115	3.86667	-1.25315
3.875	-1.20355	3.87533	-0.86955	3.87533	-1.50765	3.87533	-0.39285	3.87517	0.59395	3.875	-1.26835	3.87517	-1.38355	3.875	-1.2583
3.88333	-1.20225	3.88367	-0.8726	3.88367	-1.51105	3.88367	-0.4003	3.8835	0.5908	3.88333	-1.26895	3.8835	-1.38775	3.88333	-1.2643
3.89167	-1.20505	3.892	-0.87805	3.892	-1.514	3.892	-0.408	3.89183	0.58835	3.89167	-1.2736	3.89183	-1.3911	3.89167	-1.2711
3.9	-1.20415	3.90033	-0.88215	3.90033	-1.5169	3.90033	-0.4121	3.90017	0.58435	3.9	-1.27215	3.90017	-1.39345	3.9	-1.2753
3.90833	-1.2073	3.90867	-0.88835	3.90867	-1.5217	3.90867	-0.4213	3.9085	0.5799	3.90833	-1.27355	3.9085	-1.3995	3.90833	-1.2816
3.91667	-1.2035	3.917	-0.8898	3.917	-1.5218	3.917	-0.4214	3.91683	0.57705	3.91667	-1.26985	3.91683	-1.39875	3.91667	-1.28265
3.925	-1.20545	3.92533	-0.8945	3.92533	-1.5265	3.92533	-0.42815	3.92517	0.57285	3.925	-1.2691	3.92517	-1.40095	3.925	-1.2878
3.93333	-1.2052	3.93367	-0.9009	3.93367	-1.5293	3.93367	-0.43605	3.9335	0.56835	3.93333	-1.26635	3.9335	-1.40225	3.93333	-1.29245
3.94167	-1.2079	3.942	-0.9038	3.942	-1.53175	3.942	-0.43955	3.94183	0.56625	3.94167	-1.26605	3.94183	-1.40155	3.94167	-1.29585
3.95	-1.20835	3.95033	-0.90755	3.95033	-1.53595	3.95033	-0.44815	3.95017	0.56145	3.95	-1.2648	3.95017	-1.4042	3.95	-1.29975
3.95833	-1.2097	3.95867	-0.91315	3.95867	-1.5397	3.95867	-0.4528	3.9585	0.5579	3.95833	-1.26745	3.9585	-1.40435	3.95833	-1.30445
3.96667	-1.21125	3.967	-0.9182	3.967	-1.5442	3.967	-0.46095	3.96683	0.5539	3.96667	-1.27035	3.96683	-1.4075	3.96667	-1.3106
3.975	-1.21565	3.97533	-0.92265	3.97533	-1.54985	3.97533	-0.4678	3.97517	0.5473	3.975	-1.2735	3.97517	-1.4089	3.975	-1.3159
3.98333	-1.2132	3.98367	-0.92565	3.98367	-1.553	3.98367	-0.4721	3.9835	0.54475	3.98333	-1.27635	3.9835	-1.408	3.98333	-1.31755
3.99167	-1.21155	3.992	-0.9311	3.992	-1.5533	3.992	-0.476	3.99183	0.5414	3.99167	-1.28315	3.99183	-1.41015	3.99167	-1.3225
4	-1.2158	4.00033	-0.93535	4.00033	-1.5582	4.00033	-0.4812	4.00017	0.536	4	-1.28815	4.00017	-1.4133	4	-1.32885
4.00833	-1.2174	4.00867	-0.9397	4.00867	-1.5627	4.00867	-0.48845	4.0085	0.5324	4.00833	-1.29355	4.0085	-1.41765	4.00833	-1.33405
4.01667	-1.2164	4.017	-0.94515	4.017	-1.5646	4.017	-0.49215	4.01683	0.5282	4.01667	-1.29905	4.01683	-1.41945	4.01667	-1.33655
4.025	-1.218	4.02533	-0.9476	4.02533	-1.5671	4.02533	-0.49835	4.02517	0.52035	4.025	-1.3023	4.02517	-1.4227	4.025	-1.3417
4.03333	-1.21785	4.03367	-0.95215	4.03367	-1.57055	4.03367	-0.5027	4.0335	0.5197	4.03333	-1.3046	4.0335	-1.4238	4.03333	-1.3441
4.04167	-1.21835	4.042	-0.95515	4.042	-1.5739	4.042	-0.50685	4.04183	0.5152	4.04167	-1.3078	4.04183	-1.4256	4.04167	-1.34685
4.05	-1.2192	4.05033	-0.9629	4.05033	-1.5789	4.05033	-0.5135	4.05017	0.5135	4.05	-1.3139	4.05017	-1.43045	4.05	-1.3542
4.05833	-1.22175	4.05867	-0.9649	4.05867	-1.5821	4.05867	-0.51815	4.0585	0.50825	4.05833	-1.31435	4.0585	-1.4327	4.05833	-1.357
4.06667	-1.2204	4.067	-0.9703	4.067	-1.5852	4.067	-0.5227	4.06683	0.5058	4.06667	-1.3175	4.06683	-1.43455	4.06667	-1.36105
4.075	-1.2225	4.07533	-0.974	4.07533	-1.58705	4.07533	-0.5264	4.07517	0.50265	4.075	-1.32	4.07517	-1.4367	4.075	-1.36505
4.08333	-1.2226	4.08367	-0.97725	4.08367	-1.58955	4.08367	-0.53015	4.0835	0.50065	4.08333	-1.322	4.0835	-1.43825	4.08333	-1.36815
4.09167	-1.22385	4.092	-0.9822	4.092	-1.59425	4.092	-0.538	4.09183	0.499	4.09167	-1.3249	4.09183	-1.4431	4.09167	-1.37305
4.1	-1.22105	4.10033	-0.9851	4.10033	-1.59575	4.10033	-0.54125	4.10017	0.4936	4.1	-1.32785	4.10017	-1.4443	4.1	-1.37465
4.10833	-1.22185	4.10867	-0.9891	4.10867	-1.59835	4.10867	-0.54515	4.1085	0.4934	4.10833	-1.32985	4.1085	-1.44835	4.10833	-1.3774
4.11667	-1.22	4.117	-0.9885	4.117	-1.59735	4.117	-0.54855	4.11683	0.49185	4.11667	-1.3292	4.11683	-1.44705	4.11667	-1.3784
4.125	-1.2208	4.12533	-0.99485	4.12533	-1.60175	4.12533	-0.5546	4.12517	0.48945	4.125	-1.33525	4.12517	-1.4511	4.125	-1.3829
4.13333	-1.2224	4.13367	-0.99655	4.13367	-1.6036	4.13367	-0.56075	4.1335	0.4875	4.13333	-1.3382	4.1335	-1.45395	4.13333	-1.3842
4.14167	-1.2183	4.142	-0.9968	4.142	-1.6009	4.142	-0.56285	4.14183	0.48645	4.14167	-1.3372	4.14183	-1.452	4.14167	-1.3825
4.15	-1.2161	4.15033	-0.9995	4.15033	-1.6026	4.15033	-0.5681	4.15017	0.48285	4.15	-1.34105	4.15017	-1.4539	4.15	-1.3847
4.15833	-1.2129	4.15867	-0.9995	4.15867	-1.59955	4.15867	-0.5693	4.1585	0.48015	4.15833	-1.33955	4.1585	-1.45425	4.15833	-1.38125
4.16667	-1.21315	4.167	-1.00205	4.167	-1.5997	4.167	-0.57375	4.16683	0.47795	4.16667	-1.342	4.16683	-1.4549	4.16667	-1.38075
4.175	-1.21335	4.17533	-1.00635	4.17533	-1.60425	4.17533	-0.58055	4.17517	0.4781	4.175	-1.3475	4.17517	-1.4568	4.175	-1.3831
4.18333	-1.21415	4.18367	-1.0098	4.18367	-1.60435	4.18367	-0.58465	4.1835	0.4751	4.18333	-1.35075	4.1835	-1.45785	4.18333	-1.38545
4.19167	-1.21055	4.192	-1.00875	4.192	-1.60145	4.192	-0.5885	4.19183	0.4728	4.19167	-1.35135	4.19183	-1.4584	4.19167	-1.3855
4.2	-1.2085	4.20033	-1.01225	4.20033	-1.6027	4.20033	-0.5912	4.20017	0.4699	4.2	-1.35365	4.20017	-1.46	4.2	-1.3863
4.20833	-1.2096	4.20867	-1.01595	4.20867	-1.60475	4.20867	-0.59715	4.2085	0.46975	4.20833	-1.3581	4.2085	-1.46255	4.20833	-1.3912
4.21667	-1.21065	4.217	-1.01845	4.217	-1.60635	4.217	-0.60235	4.21683	0.46825	4.21667	-1.36165	4.21683	-1.46635	4.21667	-1.39365
4.225	-1.2105	4.22533	-1.0206	4.22533	-1.60845	4.22533	-0.60775	4.22517	0.46765	4.225	-1.3672	4.22517	-1.4708	4.225	-1.39655
4.23333	-1.20965	4.23367	-1.02365	4.23367	-1.6113	4.23367	-0.61155	4.2335	0.4663	4.23333	-1.37245	4.2335	-1.47495	4.23333	-1.40095
4.24167	-1.2101	4.242	-1.0242	4.242	-1.61075	4.242	-0.6163	4.24183	0.46485	4.24167	-1.37895	4.24183	-1.47965	4.24167	-1.40505
4.25	-1.21195	4.25033	-1.02945	4.25033	-1.6159	4.25033	-0.6241	4.25017	0.4626	4.25	-1.38995	4.25017	-1.4871	4.25	-1.4109
4.25833	-1.21445	4.25867	-1.03205	4.25867	-1.6187	4.25867	-0.63005	4.2585	0.46215	4.25833	-1.40265	4.2585	-1.4937	4.25833	-1.41755
4.26667	-1.2133	4.267	-1.03275	4.267	-1.61925	4.267	-0.6344	4.26683	0.4628	4.26667	-1.41705	4.26683	-1.5005	4.26667	-1.42105
4.275	-1.2163	4.27533	-1.0376	4.27533	-1.6242	4.27533	-0.64275	4.27517	0.46175	4.275	-1.4288	4.27517	-1.5094	4.275	-1.42825
4.28333	-1.21635	4.28367	-1.0364	4.28367	-1.62315	4.28367	-0.64345	4.2835	0.46015	4.28333	-1.4334	4.2835	-1.51125	4.28333	-1.4287
4.29167	-1.21615	4.292	-1.04115	4.292	-1.62625	4.292	-0.64675	4.29183	0.45855	4.29167	-1.43295	4.29183	-1.51435	4.29167	-1.43015
4.3	-1.21895	4.30033	-1.04555	4.30033	-1.6287	4.30033	-0.6481	4.30017	0.4592	4.3	-1.4231	4.30017	-1.5139	4.3	-1.43265
4.30833	-1.22165	4.30867	-1.04915	4.30867	-1.6331	4.30867	-0.64975	4.3085	0.4586	4.30833	-1.40915	4.3085	-1.5104	4.30833	-1.4329
4.31667	-1.22225	4.317	-1.05155	4.317	-1.63515	4.317	-0.6473	4.31683	0.45765	4.31667	-1.38945	4.31683	-1.50445	4.31667	-1.42805
4.325	-1.2257	4.32533	-1.05545	4.32533	-1.63775	4.32533	-0.64715	4.32517	0.45845	4.325	-1.36785	4.32517	-1.4993	4.325	-1.42705
4.33333	-1.22925	4.33367	-1.06115	4.33367	-1.6398	4.33367	-0.6477	4.3335	0.45775	4.33333	-1.35085	4.3335	-1.4942	4.33333	-1.42595
4.34167	-1.2277	4.342	-1.0618	4.342	-1.64155	4.342	-0.64515	4.34183	0.4553	4.34167	-1.3306	4.34183	-1.48815	4.34167	-1.4229
4.35	-1.23	4.35033	-1.06445	4.35033	-1.64315	4.35033	-0.64575	4.35017	0.45495	4.35	-1.3161	4.35017	-1.48475	4.35	-1.4238
4.35833	-1.229	4.35867	-1.0665	4.35867	-1.64365	4.35867	-0.6442	4.3585	0.45455	4.35833	-1.30345	4.3585	-1.48285	4.35833	-1.4197
4.36667	-1.2299	4.367	-1.071	4.367	-1.64605	4.367	-0.6447	4.36683	0.4527	4.36667	-1.29845	4.36683	-1.48255	4.36667	-1.42335
4.375	-1.23305	4.37533	-1.0712	4.37533	-1.64745	4.37533	-0.6449	4.37517	0.45255	4.375	-1.2919	4.37517	-1.4836	4.375	-1.4244
4.38333	-1.23385	4.38367	-1.0734	4.38367	-1.6481	4.38367	-0.64335	4.3835	0.45	4.38333	-1.29095	4.3835	-1.48395	4.38333	-1.4247
4.39167	-1.23215	4.392	-1.075	4.392	-1.6494	4.392	-0.64425	4.39183	0.44775	4.39167	-1.29	4.39183	-1.4852	4.39167	-1.42555
4.4	-1.23225	4.40033	-1.07565	4.40033	-1.64845	4.40033	-0.6439	4.40017	0.44765	4.4	-1.2911	4.40017	-1.4844	4.4	-1.4291
4.40833	-1.22955	4.40867	-1.07785	4.40867	-1.648	4.40867	-0.643	4.4085	0.4477	4.40833	-1.292	4.4085	-1.48555	4.40833	-1.4291
4.41667	-1.2323	4.417	-1.08185	4.417	-1.6519	4.417	-0.6489	4.41683	0.4447	4.41667	-1.29925	4.41683	-1.4897	4.41667	-1.43445
4.425	-1.23055	4.42533	-1.081	4.42533	-1.6513	4.42533	-0.6481	4.42517	0.4449	4.425	-1.2993	4.42517	-1.49185	4.425	-1.4354
4.43333	-1.23285	4.43367	-1.0841	4.43367	-1.6522	4.43367	-0.65355	4.4335	0.4437	4.43333	-1.30725	4.4335	-1.4957	4.43333	-1.4386
4.44167	-1.23145	4.442	-1.0848	4.442	-1.6547	4.442	-0.65865	4.44183	0.4422	4.44167	-1.31035	4.44183	-1.4993	4.44167	-1.44175
4.45	-1.23365	4.45033	-1.08775	4.45033	-1.65645	4.45033	-0.6649	4.45017	0.4427	4.45	-1.3168	4.45017	-1.50425	4.45	-1.44735
4.45833	-1.2343	4.45867	-1.09135	4.45867	-1.65745	4.45867	-0.6705	4.4585	0.44095	4.45833	-1.3264	4.4585	-1.5072	4.45833	-1.45245
4.46667	-1.23635	4.467	-1.09345	4.467	-1.658	4.467	-0.67555	4.46683	0.4407	4.46667	-1.33265	4.46683	-1.5106	4.46667	-1.454
4.475	-1.2361	4.47533	-1.0989	4.47533	-1.65995	4.47533	-0.6816	4.47517	0.4379	4.475	-1.3388	4.47517	-1.51735	4.475	-1.4593
4.48333	-1.24015	4.48367	-1.1037	4.48367	-1.66225	4.48367	-0.68775	4.4835	0.4378	4.48333	-1.34595	4.4835	-1.52045	4.48333	-1.46465
4.49167	-1.24375	4.492	-1.1074	4.492	-1.6647	4.492	-0.69305	4.49183	0.4379	4.49167	-1.353	4.49183	-1.5245	4.49167	-1.4672
4.5	-1.2431	4.50033	-1.1066	4.50033	-1.6657	4.50033	-0.69655	4.50017	0.4382	4.5	-1.3545	4.50017	-1.5274	4.5	-1.47135
4.50833	-1.2454	4.50867	-1.11125	4.50867	-1.6674	4.50867	-0.7014	4.5085	0.4357	4.50833	-1.36085	4.5085	-1.5306	4.50833	-1.47655
4.51667	-1.2445	4.517	-1.11185	4.517	-1.6652	4.517	-0.7037	4.51683	0.4352	4.51667	-1.3614	4.51683	-1.5316	4.51667	-1.4754
4.525	-1.24525	4.52533	-1.1131	4.52533	-1.6648	4.52533	-0.70805	4.52517	0.43265	4.525	-1.36525	4.52517	-1.5332	4.525	-1.47785
4.53333	-1.2463	4.53367	-1.1179	4.53367	-1.6678	4.53367	-0.70975	4.5335	0.42945	4.53333	-1.36905	4.5335	-1.5367	4.53333	-1.48155
4.54167	-1.2462	4.542	-1.11765	4.542	-1.6663	4.542	-0.71165	4.54183	0.42865	4.54167	-1.37035	4.54183	-1.5369	4.54167	-1.4818
4.55	-1.2504	4.55033	-1.12185	4.55033	-1.669	4.55033	-0.7181	4.55017	0.4264	4.55	-1.37695	4.55017	-1.5409	4.55	-1.4873
4.55833	-1.24815	4.55867	-1.1226	4.55867	-1.6703	4.55867	-0.72235	4.5585	0.426	4.55833	-1.3816	4.5585	-1.5421	4.55833	-1.48915
4.56667	-1.2495	4.567	-1.126	4.567	-1.67175	4.567	-0.7271	4.56683	0.42605	4.56667	-1.38375	4.56683	-1.5472	4.56667	-1.49155
4.575	-1.2489	4.57533	-1.12485	4.57533	-1.67055	4.57533	-0.7287	4.57517	0.42465	4.575	-1.3861	4.57517	-1.54665	4.575	-1.493
4.58333	-1.2506	4.58367	-1.12795	4.58367	-1.67205	4.58367	-0.735	4.5835	0.42345	4.58333	-1.39115	4.5835	-1.55015	4.58333	-1.49635
4.59167	-1.25135	4.592	-1.13	4.592	-1.67385	4.592	-0.7377	4.59183	0.42435	4.59167	-1.39475	4.59183	-1.5506	4.59167	-1.4969
4.6	-1.2509	4.60033	-1.13055	4.60033	-1.6747	4.60033	-0.73935	4.60017	0.42075	4.6	-1.3947	4.60017	-1.5517	4.6	-1.49965
4.60833	-1.2513	4.60867	-1.12935	4.60867	-1.67365	4.60867	-0.73995	4.6085	0.42155	4.60833	-1.3941	4.6085	-1.54825	4.60833	-1.4959
4.61667	-1.24815	4.617	-1.12695	4.617	-1.67165	4.617	-0.736	4.61683	0.42055	4.61667	-1.38995	4.61683	-1.5465	4.61667	-1.49535
4.625	-1.2451	4.62533	-1.12225	4.62533	-1.66795	4.62533	-0.7302	4.62517	0.42045	4.625	-1.38295	4.62517	-1.53735	4.625	-1.492
4.63333	-1.24335	4.63367	-1.1176	4.63367	-1.6647	4.63367	-0.721	4.6335	0.42215	4.63333	-1.3723	4.6335	-1.53015	4.63333	-1.48535
4.64167	-1.2375	4.642	-1.1057	4.642	-1.6581	4.642	-0.706	4.64183	0.42185	4.64167	-1.3539	4.64183	-1.5154	4.64167	-1.47425
4.65	-1.2283	4.65033	-1.0916	4.65033	-1.64795	4.65033	-0.6844	4.65017	0.4233	4.65	-1.32605	4.65017	-1.4955	4.65	-1.45985
4.65833	-1.21905	4.65867	-1.07735	4.65867	-1.6382	4.65867	-0.66045	4.6585	0.4212	4.65833	-1.2949	4.6585	-1.4717	4.65833	-1.4448
4.66667	-1.205	4.667	-1.05305	4.667	-1.6236	4.667	-0.6331	4.66683	0.42315	4.66667	-1.2549	4.66683	-1.44115	4.66667	-1.42135
4.675	-1.19385	4.67533	-1.0313	4.67533	-1.6124	4.67533	-0.6076	4.67517	0.42635	4.675	-1.21805	4.67517	-1.41345	4.675	-1.4016
4.68333	-1.1802	4.68367	-1.0107	4.68367	-1.59985	4.68367	-0.58175	4.6835	0.4323	4.68333	-1.1804	4.6835	-1.38555	4.68333	-1.38005
4.69167	-1.1676	4.692	-0.98715	4.692	-1.5882	4.692	-0.5578	4.69183	0.4388	4.69167	-1.14655	4.69183	-1.3577	4.69167	-1.35955
4.7	-1.16005	4.70033	-0.972	4.70033	-1.5812	4.70033	-0.54595	4.70017	0.4476	4.7	-1.12545	4.70017	-1.3428	4.7	-1.3486
4.70833	-1.14255	4.70867	-0.94735	4.70867	-1.56505	4.70867	-0.52825	4.7085	0.4587	4.70833	-1.10245	4.7085	-1.3212	4.70833	-1.3273
4.71667	-1.1745	4.717	-0.97485	4.717	-1.5968	4.717	-0.56075	4.71683	0.4698	4.71667	-1.13515	4.71683	-1.3508	4.71667	-1.35945
4.725	-1.13325	4.72533	-0.93245	4.72533	-1.5596	4.72533	-0.5256	4.72517	0.4825	4.725	-1.10285	4.72517	-1.31225	4.725	-1.3211
4.73333	-1.1854	4.73367	-0.98595	4.73367	-1.6138	4.73367	-0.58605	4.7335	0.4944	4.73333	-1.1687	4.7335	-1.37125	4.73333	-1.3783
4.74167	-1.1527	4.742	-0.9569	4.742	-1.58225	4.742	-0.5651	4.74183	0.506	4.74167	-1.152	4.74183	-1.3476	4.74167	-1.3497
4.75	-1.1597	4.75033	-0.9666	4.75033	-1.59115	4.75033	-0.5837	4.75017	0.51455	4.75	-1.1796	4.75017	-1.3667	4.75	-1.36375
4.75833	-1.17105	4.75867	-0.98365	4.75867	-1.60235	4.75867	-0.60635	4.7585	0.5212	4.75833	-1.2098	4.7585	-1.39	4.75833	-1.38055
4.76667	-1.1772	4.767	-0.99485	4.767	-1.61065	4.767	-0.62325	4.76683	0.52425	4.76667	-1.237	4.76683	-1.4063	4.76667	-1.3943
4.775	-1.1863	4.77533	-1.0097	4.77533	-1.6191	4.77533	-0.6435	4.77517	0.5268	4.775	-1.263	4.77517	-1.4284	4.775	-1.40965
4.78333	-1.19025	4.78367	-1.01745	4.78367	-1.62395	4.78367	-0.65725	4.7835	0.52375	4.78333	-1.2846	4.7835	-1.4434	4.78333	-1.4183
4.79167	-1.1983	4.792	-1.0269	4.792	-1.6313	4.792	-0.67205	4.79183	0.51905	4.79167	-1.30615	4.79183	-1.4595	4.79167	-1.42845
4.8	-1.2032	4.80033	-1.033	4.80033	-1.63755	4.80033	-0.68305	4.80017	0.51305	4.8	-1.32525	4.80017	-1.4749	4.8	-1.43785
4.80833	-1.2088	4.80867	-1.04185	4.80867	-1.64215	4.80867	-0.69475	4.8085	0.50755	4.80833	-1.34315	4.8085	-1.48735	4.80833	-1.4461
4.81667	-1.21085	4.817	-1.04195	4.817	-1.6466	4.817	-0.70305	4.81683	0.4997	4.81667	-1.3537	4.81683	-1.4963	4.81667	-1.45395
4.825	-1.21055	4.82533	-1.04355	4.82533	-1.6494	4.82533	-0.70805	4.82517	0.4921	4.825	-1.3651	4.82517	-1.504	4.825	-1.45635
4.83333	-1.21035	4.83367	-1.0423	4.83367	-1.6502	4.83367	-0.70955	4.8335	0.4848	4.83333	-1.3731	4.8335	-1.5121	4.83333	-1.45925
4.84167	-1.2131	4.842	-1.0431	4.842	-1.6532	4.842	-0.71405	4.84183	0.4792	4.84167	-1.38275	4.84183	-1.5184	4.84167	-1.4632
4.85	-1.21135	4.85033	-1.03855	4.85033	-1.65395	4.85033	-0.7131	4.85017	0.47355	4.85	-1.3882	4.85017	-1.52155	4.85	-1.4634
4.85833	-1.2084	4.85867	-1.0305	4.85867	-1.65215	4.85867	-0.7099	4.8585	0.4691	4.85833	-1.39035	4.8585	-1.5209	4.85833	-1.4605
4.86667	-1.20595	4.867	-1.02505	4.867	-1.6512	4.867	-0.70325	4.86683	0.4659	4.86667	-1.39445	4.86683	-1.52235	4.86667	-1.4587
4.875	-1.2035	4.87533	-1.0197	4.87533	-1.65045	4.87533	-0.6975	4.87517	0.46355	4.875	-1.39795	4.87517	-1.5233	4.875	-1.4559
4.88333	-1.1996	4.88367	-1.0124	4.88367	-1.6503	4.88367	-0.6926	4.8835	0.46245	4.88333	-1.39845	4.8835	-1.52545	4.88333	-1.45425
4.89167	-1.19615	4.892	-1.0027	4.892	-1.65005	4.892	-0.68615	4.89183	0.4641	4.89167	-1.4013	4.89183	-1.5247	4.89167	-1.45115
4.9	-1.19065	4.90033	-0.9939	4.90033	-1.6463	4.90033	-0.6781	4.90017	0.46265	4.9	-1.3995	4.90017	-1.5234	4.9	-1.44515
4.90833	-1.1851	4.90867	-0.98165	4.90867	-1.64405	4.90867	-0.67155	4.9085	0.4623	4.90833	-1.40185	4.9085	-1.5231	4.90833	-1.4408
4.91667	-1.17865	4.917	-0.9686	4.917	-1.64005	4.917	-0.66495	4.91683	0.46605	4.91667	-1.40075	4.91683	-1.52015	4.91667	-1.4351
4.925	-1.17175	4.92533	-0.95305	4.92533	-1.63875	4.92533	-0.6587	4.92517	0.4706	4.925	-1.40065	4.92517	-1.52025	4.925	-1.43165
4.93333	-1.1629	4.93367	-0.93925	4.93367	-1.63655	4.93367	-0.6534	4.9335	0.47705	4.93333	-1.40095	4.9335	-1.5204	4.93333	-1.42545
4.94167	-1.1558	4.942	-0.9234	4.942	-1.63425	4.942	-0.6472	4.94183	0.48325	4.94167	-1.4016	4.94183	-1.521	4.94167	-1.4212
4.95	-1.14465	4.95033	-0.9029	4.95033	-1.63	4.95033	-0.63675	4.95017	0.4906	4.95	-1.39885	4.95017	-1.5193	4.95	-1.41305
4.95833	-1.1356	4.95867	-0.88645	4.95867	-1.62675	4.95867	-0.62895	4.9585	0.4997	4.95833	-1.39915	4.9585	-1.51905	4.95833	-1.40685
4.96667	-1.1257	4.967	-0.86765	4.967	-1.62345	4.967	-0.62315	4.96683	0.5089	4.96667	-1.39785	4.96683	-1.51835	4.96667	-1.399
4.975	-1.11565	4.97533	-0.84715	4.97533	-1.61995	4.97533	-0.6141	4.97517	0.5162	4.975	-1.3987	4.97517	-1.5172	4.975	-1.39285
4.98333	-1.10495	4.98367	-0.82345	4.98367	-1.6141	4.98367	-0.60175	4.9835	0.52365	4.98333	-1.39535	4.9835	-1.5129	4.98333	-1.3826
4.99167	-1.0958	4.992	-0.8018	4.992	-1.6107	4.992	-0.59165	4.99183	0.53175	4.99167	-1.3969	4.99183	-1.5089	4.99167	-1.3749
5	-1.086	5.00033	-0.777	5.00033	-1.605	5.00033	-0.5747	5.00017	0.5384	5	-1.3935	5.00017	-1.50035	5	-1.3601
5.00833	-1.0772	5.00867	-0.7516	5.00867	-1.5993	5.00867	-0.5592	5.0085	0.5435	5.00833	-1.3913	5.0085	-1.4978	5.00833	-1.3477
5.01667	-1.0701	5.017	-0.72805	5.017	-1.59295	5.017	-0.5442	5.01683	0.5492	5.01667	-1.3879	5.01683	-1.49375	5.01667	-1.33475
5.025	-1.0616	5.02533	-0.704	5.02533	-1.5843	5.02533	-0.5206	5.02517	0.55795	5.025	-1.3809	5.02517	-1.48685	5.025	-1.3202
5.03333	-1.0559	5.03367	-0.68525	5.03367	-1.5793	5.03367	-0.50455	5.0335	0.5614	5.03333	-1.37895	5.0335	-1.48615	5.03333	-1.30835
5.04167	-1.0509	5.042	-0.66335	5.042	-1.57225	5.042	-0.48425	5.04183	0.5674	5.04167	-1.3734	5.04183	-1.4834	5.04167	-1.2946
5.05	-1.0456	5.05033	-0.64375	5.05033	-1.567	5.05033	-0.4673	5.05017	0.57385	5.05	-1.367	5.05017	-1.48205	5.05	-1.2783
5.05833	-1.0422	5.05867	-0.626	5.05867	-1.56195	5.05867	-0.45085	5.0585	0.58205	5.05833	-1.3645	5.0585	-1.48045	5.05833	-1.2661
5.06667	-1.0423	5.067	-0.61055	5.067	-1.55945	5.067	-0.4401	5.06683	0.5873	5.06667	-1.3608	5.06683	-1.48045	5.06667	-1.2531
5.075	-1.0388	5.07533	-0.595	5.07533	-1.5526	5.07533	-0.4301	5.07517	0.59635	5.075	-1.3524	5.07517	-1.4808	5.075	-1.2408
5.08333	-1.0372	5.08367	-0.58315	5.08367	-1.55115	5.08367	-0.42355	5.0835	0.6019	5.08333	-1.34855	5.0835	-1.48235	5.08333	-1.2301
5.09167	-1.03485	5.092	-0.5683	5.092	-1.5479	5.092	-0.4179	5.09183	0.6103	5.09167	-1.3388	5.09183	-1.4815	5.09167	-1.219
5.1	-1.02985	5.10033	-0.55435	5.10033	-1.544	5.10033	-0.4067	5.10017	0.6177	5.1	-1.32895	5.10017	-1.4796	5.1	-1.21035
5.10833	-1.018	5.10867	-0.5325	5.10867	-1.5333	5.10867	-0.3803	5.1085	0.62445	5.10833	-1.3085	5.1085	-1.47265	5.10833	-1.19025
5.11667	-1.01075	5.117	-0.51535	5.117	-1.5247	5.117	-0.34965	5.11683	0.63105	5.11667	-1.29005	5.11683	-1.4639	5.11667	-1.1785
5.125	-1.0609	5.12533	-0.5559	5.12533	-1.5724	5.12533	-0.3526	5.12517	0.6408	5.125	-1.32375	5.12517	-1.5123	5.125	-1.22105
5.13333	-1.02	5.13367	-0.5048	5.13367	-1.5311	5.13367	-0.23745	5.1335	0.6492	5.13333	-1.2584	5.1335	-1.4717	5.13333	-1.1735
5.14167	-1.01155	5.142	-0.48985	5.142	-1.5231	5.142	-0.11565	5.14183	0.65585	5.14167	-1.2113	5.14183	-1.46175	5.14167	-1.1534
5.15	-1.01095	5.15033	-0.48185	5.15033	-1.5209	5.15033	0.04145	5.15017	0.6611	5.15	-1.15695	5.15017	-1.46015	5.15	-1.14075
5.15833	-1.0105	5.15867	-0.47255	5.15867	-1.51565	5.15867	0.24985	5.1585	0.66695	5.15833	-1.0785	5.1585	-1.45515	5.15833	-1.12095
5.16667	-1.0043	5.167	-0.4609	5.167	-1.50915	5.167	0.49835	5.16683	0.67235	5.16667	-0.97795	5.16683	-1.44375	5.16667	-1.09615
5.175	-1.0007	5.17533	-0.4535	5.17533	-1.50245	5.17533	0.76785	5.17517	0.67705	5.175	-0.86045	5.17517	-1.4378	5.175	-1.0704
5.18333	-0.9972	5.18367	-0.4422	5.18367	-1.4952	5.18367	1.03895	5.1835	0.6838	5.18333	-0.7349	5.1835	-1.425	5.18333	-1.03945
5.19167	-0.99335	5.192	-0.43375	5.192	-1.48625	5.192	1.28045	5.19183	0.6901	5.19167	-0.61115	5.19183	-1.4163	5.19167	-1.0098
5.2	-0.98835	5.20033	-0.4221	5.20033	-1.47965	5.20033	1.4717	5.20017	0.7007	5.2	-0.5011	5.20017	-1.4045	5.2	-0.98245
5.20833	-0.9857	5.20867	-0.4135	5.20867	-1.4743	5.20867	1.5917	5.2085	0.71795	5.20833	-0.42325	5.2085	-1.3966	5.20833	-0.96475
5.21667	-0.98365	5.217	-0.4058	5.217	-1.4711	5.217	1.63495	5.21683	0.74285	5.21667	-0.3776	5.21683	-1.38885	5.21667	-0.9536
5.225	-0.98	5.22533	-0.3963	5.22533	-1.4665	5.22533	1.60835	5.22517	0.78045	5.225	-0.36635	5.22517	-1.3813	5.225	-0.9466
5.23333	-0.97945	5.23367	-0.3881	5.23367	-1.46645	5.23367	1.52195	5.2335	0.83535	5.23333	-0.3891	5.2335	-1.3724	5.23333	-0.947
5.24167	-0.9751	5.242	-0.37635	5.242	-1.46335	5.242	1.3973	5.24183	0.91255	5.24167	-0.43245	5.24183	-1.36	5.24167	-0.94635
5.25	-0.96825	5.25033	-0.36015	5.25033	-1.46025	5.25033	1.2544	5.25017	1.00665	5.25	-0.4894	5.25017	-1.3383	5.25	-0.94495
5.25833	-0.9567	5.25867	-0.33895	5.25867	-1.4548	5.25867	1.1124	5.2585	1.11825	5.25833	-0.5464	5.2585	-1.2991	5.25833	-0.9336
5.26667	-0.93715	5.267	-0.3017	5.267	-1.43725	5.267	0.99015	5.26683	1.24285	5.26667	-0.59275	5.26683	-1.2304	5.26667	-0.905
5.275	-0.90735	5.27533	-0.2527	5.27533	-1.41005	5.27533	0.8996	5.27517	1.3662	5.275	-0.62165	5.27517	-1.12335	5.275	-0.853
5.28333	-0.86105	5.28367	-0.1726	5.28367	-1.361	5.28367	0.8577	5.2835	1.48005	5.28333	-0.6086	5.2835	-0.9524	5.28333	-0.76125
5.29167	-0.7966	5.292	-0.0698	5.292	-1.29515	5.292	0.8609	5.29183	1.57505	5.29167	-0.5641	5.29183	-0.7096	5.29167	-0.62935
5.3	-0.71075	5.30033	0.06675	5.30033	-1.20265	5.30033	0.92035	5.30017	1.64985	5.3	-0.46655	5.30017	-0.3835	5.3	-0.4467
5.30833	-0.5991	5.30867	0.24485	5.30867	-1.0806	5.30867	1.03735	5.3085	1.71	5.30833	-0.3113	5.3085	0.0398	5.30833	-0.2027
5.31667	-0.46245	5.317	0.46315	5.317	-0.9275	5.317	1.202	5.31683	1.7642	5.31667	-0.10585	5.31683	0.5406	5.31667	0.09155
5.325	-0.30335	5.32533	0.7162	5.32533	-0.75455	5.32533	1.40095	5.32517	1.8258	5.325	0.13885	5.32517	1.10295	5.325	0.42715
5.33333	-0.13005	5.33367	0.99455	5.33367	-0.57315	5.33367	1.61605	5.3335	1.91525	5.33333	0.40195	5.3335	1.6874	5.33333	0.7802
5.34167	0.05015	5.342	1.28555	5.342	-0.3918	5.342	1.8291	5.34183	2.03525	5.34167	0.66285	5.34183	2.249	5.34167	1.1291
5.35	0.22565	5.35033	1.5741	5.35033	-0.2244	5.35033	2.0235	5.35017	2.19705	5.35	0.89615	5.35017	2.7436	5.35	1.44785
5.35833	0.3817	5.35867	1.8452	5.35867	-0.0878	5.35867	2.1836	5.3585	2.39045	5.35833	1.07875	5.3585	3.1327	5.35833	1.70705
5.36667	0.5165	5.367	2.0872	5.367	0.01405	5.367	2.30305	5.36683	2.6033	5.36667	1.20155	5.36683	3.3914	5.36667	1.89855
5.375	0.6195	5.37533	2.2875	5.37533	0.0706	5.37533	2.37285	5.37517	2.816	5.375	1.25135	5.37517	3.50595	5.375	2.00815
5.38333	0.69635	5.38367	2.4493	5.38367	0.0934	5.38367	2.40195	5.3835	3.00665	5.38333	1.2389	5.3835	3.48655	5.38333	2.0422
5.39167	0.7433	5.392	2.5739	5.392	0.08105	5.392	2.3942	5.39183	3.1566	5.39167	1.17015	5.39183	3.34875	5.39167	2.00995
5.4	0.76975	5.40033	2.66715	5.40033	0.04325	5.40033	2.36235	5.40017	3.25245	5.4	1.0579	5.40017	3.11575	5.4	1.92045
5.40833	0.7778	5.40867	2.7339	5.40867	-0.014	5.40867	2.31475	5.4085	3.28605	5.40833	0.9141	5.4085	2.81655	5.40833	1.79315
5.41667	0.77885	5.417	2.788	5.417	-0.07715	5.417	2.25985	5.41683	3.257	5.41667	0.75825	5.41683	2.4776	5.41667	1.6447
5.425	0.77335	5.42533	2.82975	5.42533	-0.1473	5.42533	2.20715	5.42517	3.1789	5.425	0.5912	5.42517	2.12	5.425	1.48425
5.43333	0.7678	5.43367	2.8682	5.43367	-0.2147	5.43367	2.16165	5.4335	3.05655	5.43333	0.43175	5.4335	1.7601	5.43333	1.32565
5.44167	0.7675	5.442	2.9115	5.442	-0.2746	5.442	2.13005	5.44183	2.9061	5.44167	0.2811	5.44183	1.41825	5.44167	1.1781
5.45	0.77275	5.45033	2.95425	5.45033	-0.33085	5.45033	2.1108	5.45017	2.74195	5.45	0.1447	5.45017	1.09855	5.45	1.04435
5.45833	0.7861	5.45867	3.0055	5.45867	-0.37475	5.45867	2.10915	5.4585	2.5744	5.45833	0.0258	5.4585	0.8072	5.45833	0.9262
5.46667	0.8083	5.467	3.06075	5.467	-0.40715	5.467	2.12445	5.46683	2.41305	5.46667	-0.075	5.46683	0.5477	5.46667	0.83245
5.475	0.83875	5.47533	3.1228	5.47533	-0.42975	5.47533	2.15585	5.47517	2.26905	5.475	-0.15565	5.47517	0.32395	5.475	0.75875
5.48333	0.8761	5.48367	3.19095	5.48367	-0.4427	5.48367	2.20265	5.4835	2.1452	5.48333	-0.2184	5.4835	0.13215	5.48333	0.70335
5.49167	0.92255	5.492	3.2626	5.492	-0.4468	5.492	2.26405	5.49183	2.04235	5.49167	-0.26435	5.49183	-0.02885	5.49167	0.66725
5.5	0.977	5.50033	3.3387	5.50033	-0.44165	5.50033	2.33565	5.50017	1.96575	5.5	-0.29565	5.50017	-0.1627	5.5	0.64965
5.50833	1.0346	5.50867	3.41925	5.50867	-0.43115	5.50867	2.4174	5.5085	1.91045	5.50833	-0.3143	5.5085	-0.27585	5.50833	0.6443
5.51667	1.101	5.517	3.5094	5.517	-0.4075	5.517	2.5122	5.51683	1.88115	5.51667	-0.31885	5.51683	-0.3642	5.51667	0.6595
5.525	1.1747	5.52533	3.6057	5.52533	-0.37865	5.52533	2.6134	5.52517	1.87395	5.525	-0.3124	5.52517	-0.43575	5.525	0.6897
5.53333	1.2489	5.53367	3.70645	5.53367	-0.34295	5.53367	2.71985	5.5335	1.8839	5.53333	-0.30235	5.5335	-0.49225	5.53333	0.7301
5.54167	1.3258	5.542	3.81305	5.542	-0.3018	5.542	2.82865	5.54183	1.91575	5.54167	-0.2838	5.54183	-0.5348	5.54167	0.78185
5.55	1.4034	5.55033	3.9265	5.55033	-0.25415	5.55033	2.94255	5.55017	1.9622	5.55	-0.25995	5.55017	-0.5676	5.55	0.84315
5.55833	1.48625	5.55867	4.04815	5.55867	-0.201	5.55867	3.05495	5.5585	2.02035	5.55833	-0.2305	5.5585	-0.58675	5.55833	0.91795
5.56667	1.56755	5.567	4.17115	5.567	-0.14535	5.567	3.1687	5.56683	2.0884	5.56667	-0.2	5.56683	-0.60195	5.56667	0.9976
5.575	1.6523	5.57533	4.30485	5.57533	-0.08425	5.57533	3.28455	5.57517	2.166	5.575	-0.16275	5.57517	-0.60595	5.575	1.0874
5.58333	1.73485	5.58367	4.4441	5.58367	-0.0194	5.58367	3.404	5.5835	2.25015	5.58333	-0.12405	5.5835	-0.60795	5.58333	1.18425
5.59167	1.8235	5.592	4.592	5.592	0.05255	5.592	3.5257	5.59183	2.3439	5.59167	-0.07945	5.59183	-0.59985	5.59167	1.2892
5.6	1.911	5.60033	4.7453	5.60033	0.125	5.60033	3.6463	5.60017	2.4405	5.6	-0.03785	5.60017	-0.59145	5.6	1.39595
5.60833	2.00155	5.60867	4.9074	5.60867	0.20255	5.60867	3.7724	5.6085	2.5459	5.60833	0.01465	5.6085	-0.5781	5.60833	1.5114
5.61667	2.092	5.617	5.07295	5.617	0.2823	5.617	3.89585	5.61683	2.6594	5.61667	0.06505	5.61683	-0.562	5.61667	1.6275
5.625	2.19005	5.62533	5.24515	5.62533	0.36645	5.62533	4.0234	5.62517	2.78325	5.625	0.1222	5.62517	-0.5396	5.625	1.7481
5.63333	2.28295	5.63367	5.41285	5.63367	0.4466	5.63367	4.14355	5.6335	2.9178	5.63333	0.18005	5.6335	-0.51495	5.63333	1.86755
5.64167	2.3535	5.642	5.55535	5.642	0.5077	5.642	4.23685	5.64183	3.0665	5.64167	0.2178	5.64183	-0.50905	5.64167	1.96635
5.65	2.4202	5.65033	5.6889	5.65033	0.5679	5.65033	4.32025	5.65017	3.2295	5.65	0.26095	5.65017	-0.4954	5.65	2.05915
5.65833	2.51065	5.65867	5.83675	5.65867	0.6587	5.65867	4.42195	5.6585	3.4069	5.65833	0.33265	5.6585	-0.4447	5.65833	2.1799
5.66667	2.5633	5.667	5.9371	5.667	0.71865	5.667	4.48645	5.66683	3.59755	5.66667	0.379	5.66683	-0.41085	5.66667	2.2701
5.675	2.59445	5.67533	5.99955	5.67533	0.7667	5.67533	4.5223	5.67517	3.79615	5.675	0.4137	5.67517	-0.38265	5.675	2.34065
5.68333	2.60645	5.68367	6.02515	5.68367	0.8049	5.68367	4.5367	5.6835	3.9993	5.68333	0.4456	5.6835	-0.3489	5.68333	2.40255
5.69167	2.59515	5.692	6.0171	5.692	0.8319	5.692	4.53255	5.69183	4.1981	5.69167	0.46615	5.69183	-0.316	5.69167	2.44805
5.7	2.56985	5.70033	5.9728	5.70033	0.85495	5.70033	4.5143	5.70017	4.3892	5.7	0.486	5.70017	-0.2737	5.7	2.4858
5.70833	2.5254	5.70867	5.90265	5.70867	0.86905	5.70867	4.4852	5.7085	4.56145	5.70833	0.49885	5.7085	-0.2308	5.70833	2.51755
5.71667	2.4689	5.717	5.80775	5.717	0.88345	5.717	4.45225	5.71683	4.7091	5.71667	0.5107	5.71683	-0.1815	5.71667	2.5503
5.725	2.4097	5.72533	5.70815	5.72533	0.9016	5.72533	4.42695	5.72517	4.82415	5.725	0.52195	5.72517	-0.1223	5.725	2.5876
5.73333	2.35585	5.73367	5.61675	5.73367	0.9321	5.73367	4.4217	5.7335	4.9086	5.73333	0.5434	5.7335	-0.05345	5.73333	2.6462
5.74167	2.31345	5.742	5.5455	5.742	0.9755	5.742	4.43775	5.74183	4.95715	5.74167	0.5755	5.74183	0.02535	5.74167	2.7229
5.75	2.2969	5.75033	5.51675	5.75033	1.04155	5.75033	4.49165	5.75017	4.97615	5.75	0.62315	5.75017	0.1164	5.75	2.8381
5.75833	2.31035	5.75867	5.54115	5.75867	1.1295	5.75867	4.5799	5.7585	4.9679	5.75833	0.68765	5.7585	0.2168	5.75833	2.9874
5.76667	2.3626	5.767	5.63625	5.767	1.254	5.767	4.7191	5.76683	4.94575	5.76667	0.7767	5.76683	0.33575	5.76667	3.18425
5.775	2.4626	5.77533	5.80585	5.77533	1.40265	5.77533	4.8997	5.77517	4.9204	5.775	0.8881	5.77517	0.46375	5.775	3.42435
5.78333	2.60345	5.78367	6.0483	5.78367	1.5792	5.78367	5.1163	5.7835	4.90405	5.78333	1.01915	5.7835	0.59915	5.78333	3.70375
5.79167	2.78665	5.792	6.3619	5.792	1.7815	5.792	5.3603	5.79183	4.9089	5.79167	1.16895	5.79183	0.7409	5.79167	4.01375
5.8	3.0026	5.80033	6.7264	5.80033	1.99395	5.80033	5.6185	5.80017	4.9545	5.8	1.32925	5.80017	0.8803	5.8	4.3412
5.80833	3.2378	5.80867	7.1211	5.80867	2.21035	5.80867	5.87405	5.8085	5.05225	5.80833	1.48685	5.8085	1.01355	5.80833	4.6691
5.81667	3.48065	5.817	7.5281	5.817	2.4206	5.817	6.114	5.81683	5.20865	5.81667	1.64415	5.81683	1.13875	5.81667	4.9869
5.825	3.71425	5.82533	7.9157	5.82533	2.6099	5.82533	6.31685	5.82517	5.4277	5.825	1.78315	5.82517	1.24555	5.825	5.2686
5.83333	3.92365	5.83367	8.2583	5.83367	2.7695	5.83367	6.4717	5.8335	5.71095	5.83333	1.89875	5.8335	1.3331	5.83333	5.50405
5.84167	4.09305	5.842	8.5365	5.842	2.88865	5.842	6.5667	5.84183	6.04665	5.84167	1.9856	5.84183	1.3953	5.84167	5.6779
5.85	4.21115	5.85033	8.73045	5.85033	2.9616	5.85033	6.59665	5.85017	6.42035	5.85	2.0355	5.85017	1.43175	5.85	5.7821
5.85833	4.2737	5.85867	8.8278	5.85867	2.98435	5.85867	6.55795	5.8585	6.8133	5.85833	2.04935	5.8585	1.44375	5.85833	5.81135
5.86667	4.27325	5.867	8.82245	5.867	2.9592	5.867	6.4557	5.86683	7.20395	5.86667	2.02855	5.86683	1.43375	5.86667	5.7676
5.875	4.21245	5.87533	8.7132	5.87533	2.8887	5.87533	6.2929	5.87517	7.5673	5.875	1.9778	5.87517	1.40935	5.875	5.65745
5.88333	4.09265	5.88367	8.50835	5.88367	2.77375	5.88367	6.07895	5.8835	7.885	5.88333	1.89675	5.8835	1.37305	5.88333	5.48105
5.89167	3.9167	5.892	8.2134	5.892	2.62255	5.892	5.8196	5.89183	8.1354	5.89167	1.79225	5.89183	1.33015	5.89167	5.25335
5.9	3.69475	5.90033	7.84575	5.90033	2.44605	5.90033	5.53135	5.90017	8.3023	5.9	1.67145	5.90017	1.28925	5.9	4.98385
5.90833	3.4383	5.90867	7.41765	5.90867	2.25245	5.90867	5.2252	5.9085	8.3789	5.90833	1.5428	5.9085	1.2591	5.90833	4.6914
5.91667	3.15605	5.917	6.94335	5.917	2.047	5.917	4.9092	5.91683	8.36245	5.91667	1.41375	5.91683	1.2465	5.91667	4.38095
5.925	2.86185	5.92533	6.4449	5.92533	1.8439	5.92533	4.60105	5.92517	8.25545	5.925	1.28825	5.92517	1.25415	5.925	4.06875
5.93333	2.55665	5.93367	5.9277	5.93367	1.6403	5.93367	4.2988	5.9335	8.06345	5.93333	1.1686	5.9335	1.2817	5.93333	3.76325
5.94167	2.2604	5.942	5.41715	5.942	1.4535	5.942	4.0195	5.94183	7.79745	5.94167	1.06555	5.94183	1.34	5.94167	3.47795
5.95	1.97905	5.95033	4.9239	5.95033	1.28795	5.95033	3.77295	5.95017	7.4743	5.95	0.9864	5.95017	1.43505	5.95	3.22045
5.95833	1.70815	5.95867	4.4502	5.95867	1.1389	5.95867	3.5522	5.9585	7.10705	5.95833	0.9214	5.9585	1.55565	5.95833	2.99045
5.96667	1.4625	5.967	4.01185	5.967	1.01495	5.967	3.3741	5.96683	6.711	5.96667	0.8828	5.96683	1.71075	5.96667	2.80085
5.975	1.24095	5.97533	3.6208	5.97533	0.92045	5.97533	3.23825	5.97517	6.29845	5.975	0.867	5.97517	1.89795	5.975	2.65265
5.98333	1.0545	5.98367	3.2822	5.98367	0.8562	5.98367	3.15425	5.9835	5.8881	5.98333	0.8853	5.9835	2.12195	5.98333	2.55635
5.99167	0.9027	5.992	3.00185	5.992	0.82585	5.992	3.12035	5.99183	5.4922	5.99167	0.9298	5.99183	2.3799	5.99167	2.51105
6	0.7992	6.00033	2.79575	6.00033	0.83535	6.00033	3.14845	6.00017	5.1226	6	1.0138	6.00017	2.6788	6	2.52735
6.00833	0.74445	6.00867	2.66905	6.00867	0.88395	6.00867	3.23685	6.0085	4.7883	6.00833	1.1347	6.0085	3.01675	6.00833	2.6052
6.01667	0.74215	6.017	2.62415	6.017	0.975	6.017	3.3902	6.01683	4.50165	6.01667	1.29545	6.01683	3.39755	6.01667	2.7507
6.025	0.80045	6.02533	2.6728	6.02533	1.11315	6.02533	3.6083	6.02517	4.26975	6.025	1.49905	6.02517	3.81915	6.025	2.96435
6.03333	0.9163	6.03367	2.8174	6.03367	1.29335	6.03367	3.8848	6.0335	4.10465	6.03333	1.74255	6.0335	4.2796	6.03333	3.2463
6.04167	1.0917	6.042	3.05365	6.042	1.5168	6.042	4.21465	6.04183	4.014	6.04167	2.0231	6.04183	4.76915	6.04167	3.59095
6.05	1.3244	6.05033	3.37905	6.05033	1.7757	6.05033	4.58205	6.05017	4.0076	6.05	2.33695	6.05017	5.2802	6.05	3.98755
6.05833	1.59995	6.05867	3.77115	6.05867	2.0583	6.05867	4.96855	6.0585	4.0919	6.05833	2.6686	6.0585	5.79	6.05833	4.4206
6.06667	1.90965	6.067	4.21705	6.067	2.3535	6.067	5.35695	6.06683	4.27385	6.06667	3.00695	6.06683	6.28295	6.06667	4.87045
6.075	2.2323	6.07533	4.6844	6.07533	2.64245	6.07533	5.7236	6.07517	4.5519	6.075	3.3305	6.07517	6.73935	6.075	5.311
6.08333	2.55665	6.08367	5.15315	6.08367	2.9132	6.08367	6.0492	6.0835	4.92615	6.08333	3.63305	6.0835	7.1349	6.08333	5.7277
6.09167	2.85675	6.092	5.59265	6.092	3.14765	6.092	6.3153	6.09183	5.38335	6.09167	3.89005	6.09183	7.4492	6.09167	6.0914
6.1	3.1266	6.10033	5.98375	6.10033	3.3385	6.10033	6.51525	6.10017	5.9085	6.1	4.09565	6.10017	7.67295	6.1	6.3936
6.10833	3.3432	6.10867	6.2968	6.10867	3.4689	6.10867	6.6313	6.1085	6.4844	6.10833	4.2344	6.1085	7.79385	6.10833	6.61095
6.11667	3.50075	6.117	6.52265	6.117	3.5371	6.117	6.66595	6.11683	7.0764	6.11667	4.30385	6.11683	7.80925	6.11667	6.7419
6.125	3.58465	6.12533	6.64475	6.12533	3.5338	6.12533	6.6083	6.12517	7.65915	6.125	4.2974	6.12517	7.712	6.125	6.77035
6.13333	3.6049	6.13367	6.6707	6.13367	3.4717	6.13367	6.4733	6.1335	8.20375	6.13333	4.2247	6.1335	7.5202	6.13333	6.70785
6.14167	3.5568	6.142	6.59795	6.142	3.34905	6.142	6.2685	6.14183	8.6802	6.14167	4.0857	6.14183	7.23815	6.14167	6.5522
6.15	3.44115	6.15033	6.43405	6.15033	3.17335	6.15033	5.9973	6.15017	9.06875	6.15	3.89125	6.15017	6.87645	6.15	6.31065
6.15833	3.27565	6.15867	6.1926	6.15867	2.95935	6.15867	5.6786	6.1585	9.3515	6.15833	3.6504	6.1585	6.45835	6.15833	5.99865
6.16667	3.06345	6.167	5.8868	6.167	2.71205	6.167	5.3244	6.16683	9.5132	6.16667	3.37675	6.16683	5.99365	6.16667	5.6292
6.175	2.8167	6.17533	5.52995	6.17533	2.43895	6.17533	4.9477	6.17517	9.5572	6.175	3.07725	6.17517	5.50255	6.175	5.21745
6.18333	2.5475	6.18367	5.13595	6.18367	2.155	6.18367	4.56075	6.1835	9.48235	6.18333	2.7672	6.1835	4.99875	6.18333	4.77995
6.19167	2.2635	6.192	4.7238	6.192	1.8671	6.192	4.1755	6.19183	9.29935	6.19167	2.45455	6.19183	4.49615	6.19167	4.332
6.2	1.9758	6.20033	4.3054	6.20033	1.58245	6.20033	3.80185	6.20017	9.02075	6.2	2.1476	6.20017	4.0085	6.2	3.88735
6.20833	1.688	6.20867	3.88885	6.20867	1.3101	6.20867	3.4518	6.2085	8.66705	6.20833	1.8541	6.2085	3.54215	6.20833	3.4559
6.21667	1.4115	6.217	3.48765	6.217	1.05215	6.217	3.13035	6.21683	8.24695	6.21667	1.57865	6.21683	3.1089	6.21667	3.04975
6.225	1.14765	6.22533	3.10525	6.22533	0.81195	6.22533	2.847	6.22517	7.7887	6.225	1.32315	6.22517	2.71145	6.225	2.67185
6.23333	0.90145	6.23367	2.74905	6.23367	0.59385	6.23367	2.6085	6.2335	7.30585	6.23333	1.093	6.2335	2.3585	6.23333	2.3298
6.24167	0.67595	6.242	2.42715	6.242	0.3998	6.242	2.4205	6.24183	6.81705	6.24167	0.89435	6.24183	2.05625	6.24167	2.02465
6.25	0.4723	6.25033	2.1312	6.25033	0.2284	6.25033	2.28535	6.25017	6.33625	6.25	0.72305	6.25017	1.8	6.25	1.7573
6.25833	0.2884	6.25867	1.87075	6.25867	0.08025	6.25867	2.20245	6.2585	5.87835	6.25833	0.58045	6.2585	1.59245	6.25833	1.5267
6.26667	0.1271	6.267	1.64055	6.267	-0.04455	6.267	2.17265	6.26683	5.45	6.26667	0.4695	6.26683	1.43505	6.26667	1.34005
6.275	-0.01375	6.27533	1.44075	6.27533	-0.1436	6.27533	2.1847	6.27517	5.06545	6.275	0.3872	6.27517	1.3232	6.275	1.18665
6.28333	-0.14	6.28367	1.2676	6.28367	-0.2252	6.28367	2.2339	6.2835	4.7321	6.28333	0.33065	6.2835	1.253	6.28333	1.06565
6.29167	-0.25135	6.292	1.12265	6.292	-0.29155	6.292	2.29935	6.29183	4.47415	6.29167	0.30175	6.29183	1.2183	6.29167	0.97735
6.3	-0.3452	6.30033	0.99945	6.30033	-0.3396	6.30033	2.37575	6.30017	4.3199	6.3	0.2939	6.30017	1.2133	6.3	0.9151
6.30833	-0.4291	6.30867	0.89595	6.30867	-0.3782	6.30867	2.44255	6.3085	4.3348	6.30833	0.3019	6.3085	1.2278	6.30833	0.87225
6.31667	-0.50055	6.317	0.815	6.317	-0.4021	6.317	2.49705	6.31683	4.6024	6.31667	0.32185	6.31683	1.25655	6.31667	0.84825
6.325	-0.5664	6.32533	0.7464	6.32533	-0.4232	6.32533	2.5247	6.32517	5.2262	6.325	0.3438	6.32517	1.28815	6.325	0.83595
6.33333	-0.6197	6.33367	0.69435	6.33367	-0.4371	6.33367	2.53805	6.3335	6.3078	6.33333	0.36755	6.3335	1.32475	6.33333	0.8352
6.34167	-0.6666	6.342	0.6583	6.342	-0.4472	6.342	2.53735	6.34183	7.91345	6.34167	0.39265	6.34183	1.35655	6.34167	0.8436
6.35	-0.70915	6.35033	0.63795	6.35033	-0.4537	6.35033	2.5351	6.35017	10.0398	6.35	0.41215	6.35017	1.39115	6.35	0.86015
6.35833	-0.7453	6.35867	0.64205	6.35867	-0.453	6.35867	2.55095	6.3585	12.6104	6.35833	0.43095	6.3585	1.4496	6.35833	0.89445
6.36667	-0.778	6.367	0.6868	6.367	-0.43035	6.367	2.6205	6.36683	15.5086	6.36667	0.4602	6.36683	1.56815	6.36667	0.96165
6.375	-0.80905	6.37533	0.8115	6.37533	-0.35685	6.37533	2.80375	6.37517	18.5673	6.375	0.52065	6.37517	1.82065	6.375	1.09645
6.38333	-0.8358	6.38367	1.08105	6.38367	-0.1614	6.38367	3.16485	6.3835	21.6313	6.38333	0.64965	6.3835	2.31295	6.38333	1.3601
6.39167	-0.86135	6.392	1.5778	6.392	0.2555	6.392	3.7929	6.39183	24.5663	6.39167	0.90005	6.39183	3.1589	6.39167	1.8313
6.4	-0.88155	6.40033	2.39685	6.40033	1.00905	6.40033	4.74475	6.40017	27.2857	6.4	1.3396	6.40017	4.4418	6.4	2.5904
6.40833	-0.9029	6.40867	3.6017	6.40867	2.1798	6.40867	6.04735	6.4085	29.7151	6.40833	2.0161	6.4085	6.1785	6.40833	3.6916
6.41667	-0.91955	6.417	5.2144	6.417	3.7822	6.417	7.6749	6.41683	31.8263	6.41667	2.95835	6.41683	8.3093	6.41667	5.14425
6.425	-0.93425	6.42533	7.18165	6.42533	5.74775	6.42533	9.551	6.42517	33.6018	6.425	4.1451	6.42517	10.6882	6.425	6.905
6.43333	-0.94385	6.43367	9.38285	6.43367	7.93385	6.43367	11.5679	6.4335	35.0522	6.43333	5.51635	6.4335	13.125	6.43333	8.8694
6.44167	-0.9491	6.442	11.6636	6.442	10.1619	6.442	13.6127	6.44183	36.1787	6.44167	6.98115	6.44183	15.4347	6.44167	10.8972
6.45	-0.9523	6.45033	13.8557	6.45033	12.2488	6.45033	15.5779	6.45017	36.998	6.45	8.4447	6.45017	17.4559	6.45	12.8591
6.45833	-0.9553	6.45867	15.8154	6.45867	14.0396	6.45867	17.3876	6.4585	37.5194	6.45833	9.80965	6.4585	19.0903	6.45833	14.6426
6.46667	-0.94645	6.467	17.4717	6.467	14.0497	6.467	19.0126	6.46683	37.7698	6.46667	11.0289	6.46683	20.3307	6.46667	16.1888
6.475	-0.9438	6.47533	18.7641	6.47533	16.6291	6.47533	20.4194	6.47517	37.7534	6.475	12.0462	6.47517	21.1816	6.475	17.4531
6.48333	-0.92495	6.48367	19.7294	6.48367	17.388	6.48367	21.6154	6.4835	37.5067	6.48333	12.8829	6.4835	21.7244	6.48333	18.4622
6.49167	-0.9057	6.492	20.387	6.492	17.8754	6.492	22.58	6.49183	37.0537	6.49167	13.533	6.49183	22.0087	6.49167	19.2207
6.5	-0.8868	6.50033	20.7906	6.50033	18.1394	6.50033	23.3208	6.50017	36.4217	6.5	14.0166	6.50017	22.0908	6.5	19.7545
6.50833	-0.86665	6.50867	20.9847	6.50867	18.2347	6.50867	23.8632	6.5085	35.6273	6.50833	14.3554	6.5085	22.0214	6.50833	20.0991
6.51667	-0.8463	6.517	21.0074	6.517	18.2057	6.517	24.2103	6.51683	34.7165	6.51667	14.5683	6.51683	21.8325	6.51667	20.2858
6.525	-0.82645	6.52533	20.8924	6.52533	18.0851	6.52533	24.3841	6.52517	33.7406	6.525	14.6677	6.52517	21.5512	6.525	20.3353
6.53333	-0.8147	6.53367	20.6763	6.53367	17.8863	6.53367	24.4035	6.5335	32.6934	6.53333	14.6706	6.5335	21.1976	6.53333	20.2678
6.54167	-0.8008	6.542	20.3673	6.542	17.6247	6.542	24.2921	6.54183	31.5831	6.54167	14.5921	6.54183	20.7905	6.54167	20.1089
6.55	-0.79645	6.55033	19.9837	6.55033	17.3143	6.55033	24.0576	6.55017	30.4463	6.55	14.4439	6.55017	20.3316	6.55	19.8688
6.55833	-0.79235	6.55867	19.5521	6.55867	16.9773	6.55867	23.7388	6.5585	29.3087	6.55833	14.2408	6.5585	19.8519	6.55833	19.5669
6.56667	-0.79135	6.567	19.0824	6.567	16.6148	6.567	23.3483	6.56683	28.155	6.56667	13.9922	6.56683	19.3465	6.56667	19.2142
6.575	-0.7935	6.57533	18.5949	6.57533	16.2344	6.57533	22.9063	6.57517	26.9979	6.575	13.7157	6.57517	18.8397	6.575	18.827
6.58333	-0.79725	6.58367	18.0905	6.58367	15.8451	6.58367	22.4262	6.5835	25.841	6.58333	13.4233	6.5835	18.3175	6.58333	18.4105
6.59167	-0.80355	6.592	17.5864	6.592	15.4466	6.592	21.9249	6.59183	24.6769	6.59167	13.1183	6.59183	17.7891	6.59167	17.9719
6.6	-0.8103	6.60033	17.08	6.60033	15.0374	6.60033	21.4173	6.60017	23.5103	6.6	12.8151	6.60017	17.2738	6.6	17.5309
6.60833	-0.8154	6.60867	16.5813	6.60867	14.6312	6.60867	20.9204	6.6085	22.3631	6.60833	12.5447	6.6085	16.7767	6.60833	17.0938
6.61667	-0.82435	6.617	16.0874	6.617	14.2204	6.617	20.4349	6.61683	21.2397	6.61667	12.3039	6.61683	16.2933	6.61667	16.6733
6.625	-0.8285	6.62533	15.6153	6.62533	13.818	6.62533	19.9824	6.62517	20.1559	6.625	12.1188	6.62517	15.8474	6.625	16.274
6.63333	-0.83095	6.63367	15.1601	6.63367	13.4238	6.63367	19.5604	6.6335	19.119	6.63333	12.0022	6.6335	15.441	6.63333	15.9086
6.64167	-0.829	6.642	14.7303	6.642	13.0412	6.642	19.1685	6.64183	18.1338	6.64167	11.9517	6.64183	15.0825	6.64167	15.5925
6.65	-0.8222	6.65033	14.3247	6.65033	12.6743	6.65033	18.8077	6.65017	17.2064	6.65	11.9485	6.65017	14.7714	6.65	15.3163
6.65833	-0.80905	6.65867	13.9503	6.65867	12.3263	6.65867	18.4648	6.6585	16.3334	6.65833	11.9786	6.6585	14.5219	6.65833	15.0744
6.66667	-0.7865	6.667	13.6066	6.667	12.0048	6.667	18.1376	6.66683	15.5178	6.66667	12.011	6.66683	14.3384	6.66667	14.8583
6.675	-0.7556	6.67533	13.2928	6.67533	11.7089	6.67533	17.8049	6.67517	14.7584	6.675	12.0142	6.67517	14.2257	6.675	14.6577
6.68333	-0.7118	6.68367	13.0189	6.68367	11.4516	6.68367	17.4703	6.6835	14.0492	6.68333	11.9763	6.6835	14.2034	6.68333	14.4628
6.69167	-0.6537	6.692	12.7807	6.692	11.2248	6.692	17.1466	6.69183	13.3879	6.69167	11.8868	6.69183	14.277	6.69167	14.2692
6.7	-0.5798	6.70033	12.5803	6.70033	11.0373	6.70033	16.8377	6.70017	12.7825	6.7	11.7573	6.70017	14.4578	6.7	14.0868
6.70833	-0.4845	6.70867	12.4294	6.70867	10.897	6.70867	16.5617	6.7085	12.2269	6.70833	11.617	6.7085	14.7555	6.70833	13.9337
6.71667	-0.37255	6.717	12.3255	6.717	10.8054	6.717	16.3266	6.71683	11.7271	6.71667	11.4826	6.71683	15.1689	6.71667	13.8157
6.725	-0.2391	6.72533	12.2677	6.72533	10.7508	6.72533	16.1375	6.72517	11.2799	6.725	11.3783	6.72517	15.6912	6.725	13.7472
6.73333	-0.08635	6.73367	12.244	6.73367	10.7346	6.73367	15.9888	6.7335	10.8918	6.73333	11.3158	6.7335	16.2959	6.73333	13.7276
6.74167	0.0777	6.742	12.2538	6.742	10.7508	6.742	15.8707	6.74183	10.5766	6.74167	11.2991	6.74183	16.9532	6.74167	13.7561
6.75	0.25105	6.75033	12.2925	6.75033	10.7864	6.75033	15.7752	6.75017	10.3381	6.75	11.314	6.75017	17.6275	6.75	13.8175
6.75833	0.42285	6.75867	12.3415	6.75867	10.8305	6.75867	15.6899	6.7585	10.1777	6.75833	11.3559	6.7585	18.2843	6.75833	13.8983
6.76667	0.58815	6.767	12.3963	6.767	10.8765	6.767	15.6021	6.76683	10.1038	6.76667	11.4083	6.76683	18.8889	6.76667	13.9849
6.775	0.7398	6.77533	12.4463	6.77533	10.9123	6.77533	15.4967	6.77517	10.1108	6.775	11.4543	6.77517	19.3973	6.775	14.0618
6.78333	0.87055	6.78367	12.4781	6.78367	10.9232	6.78367	15.3674	6.7835	10.1944	6.78333	11.4722	6.7835	19.7868	6.78333	14.1089
6.79167	0.97325	6.792	12.4811	6.792	10.8984	6.792	15.2005	6.79183	10.3383	6.79167	11.4556	6.79183	20.0417	6.79167	14.1167
6.8	1.044	6.80033	12.4534	6.80033	10.8398	6.80033	14.9907	6.80017	10.5289	6.8	11.3892	6.80017	20.1477	6.8	14.0767
6.80833	1.08535	6.80867	12.3893	6.80867	10.7393	6.80867	14.7371	6.8085	10.747	6.80833	11.2703	6.8085	20.0997	6.80833	13.9815
6.81667	1.0891	6.817	12.2907	6.817	10.5998	6.817	14.4383	6.81683	10.9666	6.81667	11.0917	6.81683	19.9032	6.81667	13.8214
6.825	1.0659	6.82533	12.1576	6.82533	10.4217	6.82533	14.1006	6.82517	11.1692	6.825	10.8636	6.82517	19.5652	6.825	13.6066
6.83333	1.0105	6.83367	11.9903	6.83367	10.2041	6.83367	13.7218	6.8335	11.3344	6.83333	10.5786	6.8335	19.0902	6.83333	13.3346
6.84167	0.9325	6.842	11.7978	6.842	9.96075	6.842	13.3139	6.84183	11.4474	6.84167	10.2452	6.84183	18.502	6.84167	13.0179
6.85	0.83195	6.85033	11.5823	6.85033	9.69155	6.85033	12.8811	6.85017	11.4983	6.85	9.8702	6.85017	17.8191	6.85	12.6605
6.85833	0.71955	6.85867	11.3524	6.85867	9.4126	6.85867	12.4375	6.8585	11.4777	6.85833	9.46655	6.8585	17.0673	6.85833	12.2746
6.86667	0.59355	6.867	11.1122	6.867	9.11855	6.867	11.9752	6.86683	11.3882	6.86667	9.0428	6.86683	16.2635	6.86667	11.8654
6.875	0.4636	6.87533	10.8682	6.87533	8.82755	6.87533	11.5131	6.87517	11.2345	6.875	8.60805	6.87517	15.4353	6.875	11.4424
6.88333	0.33315	6.88367	10.6332	6.88367	8.54345	6.88367	11.0623	6.8835	11.0157	6.88333	8.1819	6.8835	14.6056	6.88333	11.0208
6.89167	0.20225	6.892	10.4026	6.892	8.27435	6.892	10.6214	6.89183	10.7469	6.89167	7.76165	6.89183	13.7831	6.89167	10.6004
6.9	0.077	6.90033	10.1845	6.90033	8.0244	6.90033	10.1951	6.90017	10.4367	6.9	7.3609	6.90017	12.9886	6.9	10.1915
6.90833	-0.04265	6.90867	9.98835	6.90867	7.8008	6.90867	9.79025	6.9085	10.0912	6.90833	6.9845	6.9085	12.2335	6.90833	9.80345
6.91667	-0.1547	6.917	9.80585	6.917	7.59845	6.917	9.41255	6.91683	9.7148	6.91667	6.6398	6.91683	11.5262	6.91667	9.4403
6.925	-0.25555	6.92533	9.64125	6.92533	7.4283	6.92533	9.0582	6.92517	9.3165	6.925	6.3278	6.92517	10.8715	6.925	9.1018
6.93333	-0.35	6.93367	9.49565	6.93367	7.2855	6.93367	8.7267	6.9335	8.9075	6.93333	6.04815	6.9335	10.2685	6.93333	8.78895
6.94167	-0.4304	6.942	9.3741	6.942	7.17835	6.942	8.4251	6.94183	8.4877	6.94167	5.8054	6.94183	9.7261	6.94167	8.50985
6.95	-0.5068	6.95033	9.2675	6.95033	7.099	6.95033	8.14355	6.95017	8.0688	6.95	5.5956	6.95017	9.2357	6.95	8.25735
6.95833	-0.5738	6.95867	9.1842	6.95867	7.0511	6.95867	7.88535	6.9585	7.65135	6.95833	5.42205	6.9585	8.7969	6.95833	8.03415
6.96667	-0.629	6.967	9.1166	6.967	7.03245	6.967	7.653	6.96683	7.2392	6.96667	5.27845	6.96683	8.4048	6.96667	7.8424
6.975	-0.68055	6.97533	9.06535	6.97533	7.03435	6.97533	7.43595	6.97517	6.83805	6.975	5.1571	6.97517	8.0554	6.975	7.67485
6.98333	-0.72265	6.98367	9.0266	6.98367	7.05875	6.98367	7.24255	6.9835	6.45325	6.98333	5.063	6.9835	7.7499	6.98333	7.5379
6.99167	-0.76055	6.992	8.9986	6.992	7.10065	6.992	7.0599	6.99183	6.0877	6.99167	4.99145	6.99183	7.4785	6.99167	7.4299
7	-0.7928	7.00033	8.9818	7.00033	7.16065	7.00033	6.89725	7.00017	5.74385	7	4.93675	7.00017	7.2418	7	7.3421
7.00833	-0.82155	7.00867	8.9739	7.00867	7.22755	7.00867	6.74275	7.0085	5.42645	7.00833	4.89495	7.0085	7.0309	7.00833	7.27195
7.01667	-0.84605	7.017	8.9707	7.017	7.2997	7.017	6.5979	7.01683	5.13035	7.01667	4.863	7.01683	6.8422	7.01667	7.2195
7.025	-0.8681	7.02533	8.97685	7.02533	7.37675	7.02533	6.4632	7.02517	4.8633	7.025	4.83545	7.02517	6.6753	7.025	7.18205
7.03333	-0.8867	7.03367	8.9855	7.03367	7.4457	7.03367	6.33825	7.0335	4.6204	7.03333	4.80605	7.0335	6.5226	7.03333	7.15085
7.04167	-0.902	7.042	8.99845	7.042	7.50595	7.042	6.2179	7.04183	4.40335	7.04167	4.7766	7.04183	6.38715	7.04167	7.12175
7.05	-0.91585	7.05033	9.01075	7.05033	7.5557	7.05033	6.10165	7.05017	4.2078	7.05	4.74025	7.05017	6.26055	7.05	7.09225
7.05833	-0.92715	7.05867	9.0281	7.05867	7.59	7.05867	5.99	7.0585	4.0324	7.05833	4.69765	7.0585	6.14905	7.05833	7.05855
7.06667	-0.93685	7.067	9.04165	7.067	7.60925	7.067	5.8788	7.06683	3.8747	7.06667	4.6394	7.06683	6.0426	7.06667	7.01575
7.075	-0.94775	7.07533	9.0523	7.07533	7.6067	7.07533	5.7757	7.07517	3.7397	7.075	4.5738	7.07517	5.94345	7.075	6.967
7.08333	-0.95635	7.08367	9.0606	7.08367	7.5795	7.08367	5.67195	7.0835	3.6198	7.08333	4.491	7.0835	5.8476	7.08333	6.9117
7.09167	-0.9642	7.092	9.06745	7.092	7.5312	7.092	5.5735	7.09183	3.5115	7.09167	4.39965	7.09183	5.7581	7.09167	6.8519
7.1	-0.97105	7.10033	9.06935	7.10033	7.45425	7.10033	5.47855	7.10017	3.41335	7.1	4.2927	7.10017	5.672	7.1	6.7843
7.10833	-0.9793	7.10867	9.0581	7.10867	7.3505	7.10867	5.38195	7.1085	3.325	7.10833	4.17445	7.1085	5.58705	7.10833	6.7142
7.11667	-0.98855	7.117	9.04	7.117	7.2227	7.117	5.2874	7.11683	3.24555	7.11667	4.0442	7.11683	5.50245	7.11667	6.63835
7.125	-0.99375	7.12533	9.0158	7.12533	7.0745	7.12533	5.19415	7.12517	3.17395	7.125	3.90535	7.12517	5.42025	7.125	6.5603
7.13333	-0.99995	7.13367	8.98395	7.13367	6.9048	7.13367	5.1017	7.1335	3.10355	7.13333	3.761	7.1335	5.34025	7.13333	6.47935
7.14167	-1.0066	7.142	8.9411	7.142	6.7184	7.142	5.01135	7.14183	3.04505	7.14167	3.60985	7.14183	5.26065	7.14167	6.39565
7.15	-1.01345	7.15033	8.8906	7.15033	6.51435	7.15033	4.92025	7.15017	2.9875	7.15	3.45605	7.15017	5.175	7.15	6.30725
7.15833	-1.01685	7.15867	8.8336	7.15867	6.30005	7.15867	4.83325	7.1585	2.9336	7.15833	3.2974	7.1585	5.0955	7.15833	6.2185
7.16667	-1.02405	7.167	8.76125	7.167	6.06795	7.167	4.74275	7.16683	2.88015	7.16667	3.13625	7.16683	5.0107	7.16667	6.1252
7.175	-1.0306	7.17533	8.67515	7.17533	5.8294	7.17533	4.6536	7.17517	2.82995	7.175	2.97395	7.17517	4.92575	7.175	6.0329
7.18333	-1.03825	7.18367	8.58205	7.18367	5.58075	7.18367	4.56285	7.1835	2.78285	7.18333	2.81265	7.1835	4.8387	7.18333	5.933
7.19167	-1.04485	7.192	8.47715	7.192	5.3316	7.192	4.4728	7.19183	2.73595	7.19167	2.6539	7.19183	4.7506	7.19167	5.8306
7.2	-1.051	7.20033	8.367	7.20033	5.08205	7.20033	4.38165	7.20017	2.6914	7.2	2.4961	7.20017	4.6639	7.2	5.7244
7.20833	-1.0516	7.20867	8.24845	7.20867	4.83725	7.20867	4.29435	7.2085	2.6472	7.20833	2.34705	7.2085	4.5749	7.20833	5.6179
7.21667	-1.0601	7.217	8.119	7.217	4.58965	7.217	4.20305	7.21683	2.60595	7.21667	2.19545	7.21683	4.48155	7.21667	5.5073
7.225	-1.0649	7.22533	7.9836	7.22533	4.35015	7.22533	4.1139	7.22517	2.563	7.225	2.0501	7.22517	4.3877	7.225	5.395
7.23333	-1.0725	7.23367	7.8436	7.23367	4.11445	7.23367	4.0268	7.2335	2.5232	7.23333	1.90885	7.2335	4.29225	7.23333	5.2799
7.24167	-1.0764	7.242	7.69815	7.242	3.88825	7.242	3.93845	7.24183	2.4821	7.24167	1.77405	7.24183	4.19715	7.24167	5.165
7.25	-1.07935	7.25033	7.54895	7.25033	3.66875	7.25033	3.852	7.25017	2.443	7.25	1.64755	7.25017	4.1015	7.25	5.04605
7.25833	-1.0863	7.25867	7.3938	7.25867	3.454	7.25867	3.76735	7.2585	2.4064	7.25833	1.5246	7.2585	4.00525	7.25833	4.92645
7.26667	-1.0883	7.267	7.23895	7.267	3.25225	7.267	3.685	7.26683	2.3689	7.26667	1.4157	7.26683	3.90965	7.26667	4.80665
7.275	-1.09305	7.27533	7.08235	7.27533	3.05935	7.27533	3.6046	7.27517	2.3363	7.275	1.311	7.27517	3.8175	7.275	4.6856
7.28333	-1.09605	7.28367	6.924	7.28367	2.8724	7.28367	3.5233	7.2835	2.30345	7.28333	1.21265	7.2835	3.72115	7.28333	4.5649
7.29167	-1.0989	7.292	6.76615	7.292	2.69545	7.292	3.4471	7.29183	2.26925	7.29167	1.11985	7.29183	3.62745	7.29167	4.44715
7.3	-1.103	7.30033	6.60135	7.30033	2.5262	7.30033	3.36575	7.30017	2.23835	7.3	1.03065	7.30017	3.5336	7.3	4.327
7.30833	-1.1058	7.30867	6.44035	7.30867	2.3662	7.30867	3.28465	7.3085	2.20845	7.30833	0.9485	7.3085	3.44115	7.30833	4.20975
7.31667	-1.10755	7.317	6.27945	7.317	2.21195	7.317	3.20435	7.31683	2.18	7.31667	0.8696	7.31683	3.3488	7.31667	4.0925
7.325	-1.1117	7.32533	6.1218	7.32533	2.06875	7.32533	3.12495	7.32517	2.15375	7.325	0.79815	7.32517	3.2594	7.325	3.9777
7.33333	-1.1146	7.33367	5.96245	7.33367	1.929	7.33367	3.04345	7.3335	2.12665	7.33333	0.72805	7.3335	3.17035	7.33333	3.8606
7.34167	-1.11825	7.342	5.80715	7.342	1.798	7.342	2.9626	7.34183	2.1023	7.34167	0.6633	7.34183	3.0801	7.34167	3.74795
7.35	-1.1197	7.35033	5.65305	7.35033	1.6739	7.35033	2.8837	7.35017	2.0791	7.35	0.60185	7.35017	2.9902	7.35	3.637
7.35833	-1.1236	7.35867	5.50095	7.35867	1.5544	7.35867	2.80405	7.3585	2.05385	7.35833	0.54325	7.3585	2.90275	7.35833	3.52855
7.36667	-1.1282	7.367	5.3492	7.367	1.43935	7.367	2.72415	7.36683	2.03185	7.36667	0.4838	7.36683	2.8152	7.36667	3.4205
7.375	-1.1296	7.37533	5.2051	7.37533	1.33395	7.37533	2.64725	7.37517	2.00945	7.375	0.4325	7.37517	2.73065	7.375	3.317
7.38333	-1.1305	7.38367	5.06175	7.38367	1.2313	7.38367	2.5714	7.3835	1.98845	7.38333	0.38185	7.3835	2.64815	7.38333	3.21305
7.39167	-1.13575	7.392	4.9192	7.392	1.13285	7.392	2.497	7.39183	1.9685	7.39167	0.3284	7.39183	2.56345	7.39167	3.11065
7.4	-1.13575	7.40033	4.783	7.40033	1.0429	7.40033	2.422	7.40017	1.94965	7.4	0.27895	7.40017	2.48005	7.4	3.01195
7.40833	-1.13905	7.40867	4.6497	7.40867	0.9537	7.40867	2.3498	7.4085	1.93305	7.40833	0.22755	7.4085	2.39755	7.40833	2.91695
7.41667	-1.1419	7.417	4.51665	7.417	0.86885	7.417	2.27745	7.41683	1.91635	7.41667	0.17365	7.41683	2.31595	7.41667	2.82045
7.425	-1.14515	7.42533	4.38745	7.42533	0.78675	7.42533	2.204	7.42517	1.9009	7.425	0.12275	7.42517	2.2319	7.425	2.7257
7.43333	-1.14815	7.43367	4.2629	7.43367	0.7125	7.43367	2.13565	7.4335	1.88555	7.43333	0.07235	7.4335	2.1536	7.43333	2.63565
7.44167	-1.15155	7.442	4.1418	7.442	0.6365	7.442	2.06445	7.44183	1.8743	7.44167	0.0212	7.44183	2.074	7.44167	2.5463
7.45	-1.15375	7.45033	4.02285	7.45033	0.56515	7.45033	2.0004	7.45017	1.8612	7.45	-0.0261	7.45017	1.996	7.45	2.4592
7.45833	-1.15825	7.45867	3.90855	7.45867	0.49985	7.45867	1.93635	7.4585	1.84645	7.45833	-0.06865	7.4585	1.92135	7.45833	2.3759
7.46667	-1.1603	7.467	3.79725	7.467	0.4367	7.467	1.8772	7.46683	1.83595	7.46667	-0.10505	7.46683	1.85105	7.46667	2.29625
7.475	-1.1627	7.47533	3.68775	7.47533	0.3767	7.47533	1.8198	7.47517	1.82115	7.475	-0.13525	7.47517	1.7808	7.475	2.2224
7.48333	-1.1689	7.48367	3.5809	7.48367	0.31605	7.48367	1.765	7.4835	1.8085	7.48333	-0.1522	7.4835	1.71615	7.48333	2.1556
7.49167	-1.1695	7.492	3.48115	7.492	0.26255	7.492	1.72025	7.49183	1.7921	7.49167	-0.1524	7.49183	1.66135	7.49167	2.1025
7.5	-1.17465	7.50033	3.38225	7.50033	0.2096	7.50033	1.67415	7.50017	1.7758	7.5	-0.1313	7.50017	1.6112	7.5	2.0592
7.50833	-1.1751	7.50867	3.28795	7.50867	0.15855	7.50867	1.6377	7.5085	1.7598	7.50833	-0.084	7.5085	1.57065	7.50833	2.03675
7.51667	-1.1769	7.517	3.19705	7.517	0.11205	7.517	1.60555	7.51683	1.7441	7.51667	-0.0043	7.51683	1.5398	7.51667	2.03265
7.525	-1.17615	7.52533	3.11105	7.52533	0.0669	7.52533	1.57695	7.52517	1.7249	7.525	0.10865	7.52517	1.52235	7.525	2.04505
7.53333	-1.1781	7.53367	3.0273	7.53367	0.02435	7.53367	1.5539	7.5335	1.70665	7.53333	0.24685	7.5335	1.50485	7.53333	2.0769
7.54167	-1.1764	7.542	2.94865	7.542	-0.01605	7.542	1.532	7.54183	1.68675	7.54167	0.4062	7.54183	1.5013	7.54167	2.12475
7.55	-1.17795	7.55033	2.8685	7.55033	-0.0549	7.55033	1.50795	7.55017	1.6674	7.55	0.5666	7.55017	1.49375	7.55	2.17525
7.55833	-1.1796	7.55867	2.78875	7.55867	-0.09435	7.55867	1.48025	7.5585	1.64745	7.55833	0.7156	7.5585	1.48265	7.55833	2.22295
7.56667	-1.17855	7.567	2.7164	7.567	-0.1295	7.567	1.4501	7.56683	1.6299	7.56667	0.8418	7.56683	1.4668	7.56667	2.26045
7.575	-1.17735	7.57533	2.64445	7.57533	-0.1622	7.57533	1.41385	7.57517	1.61045	7.575	0.9264	7.57517	1.44095	7.575	2.2815
7.58333	-1.18055	7.58367	2.57365	7.58367	-0.1975	7.58367	1.3715	7.5835	1.5919	7.58333	0.9652	7.5835	1.4004	7.58333	2.27865
7.59167	-1.1798	7.592	2.50615	7.592	-0.22655	7.592	1.3268	7.59183	1.57805	7.59167	0.95615	7.59183	1.35195	7.59167	2.2493
7.6	-1.182	7.60033	2.43725	7.60033	-0.2592	7.60033	1.2755	7.60017	1.5592	7.6	0.901	7.60017	1.29225	7.6	2.19615
7.60833	-1.183	7.60867	2.369	7.60867	-0.28945	7.60867	1.2193	7.6085	1.5436	7.60833	0.8119	7.6085	1.2243	7.60833	2.11845
7.61667	-1.18465	7.617	2.3059	7.617	-0.317	7.617	1.1669	7.61683	1.528	7.61667	0.6986	7.61683	1.15615	7.61667	2.0261
7.625	-1.187	7.62533	2.24105	7.62533	-0.34605	7.62533	1.10825	7.62517	1.5139	7.625	0.5638	7.62517	1.08485	7.625	1.9161
7.63333	-1.1881	7.63367	2.1785	7.63367	-0.3712	7.63367	1.05495	7.6335	1.4995	7.63333	0.42605	7.6335	1.0135	7.63333	1.8017
7.64167	-1.19095	7.642	2.1167	7.642	-0.39855	7.642	0.99955	7.64183	1.48735	7.64167	0.28575	7.64183	0.9417	7.64167	1.68165
7.65	-1.19175	7.65033	2.0583	7.65033	-0.4234	7.65033	0.95045	7.65017	1.4748	7.65	0.1549	7.65017	0.8758	7.65	1.56495
7.65833	-1.19465	7.65867	1.9991	7.65867	-0.4479	7.65867	0.8995	7.6585	1.4635	7.65833	0.03115	7.6585	0.81245	7.65833	1.45255
7.66667	-1.19405	7.667	1.94525	7.667	-0.46865	7.667	0.8557	7.66683	1.45035	7.66667	-0.0791	7.66683	0.75395	7.66667	1.34815
7.675	-1.19785	7.67533	1.8872	7.67533	-0.4921	7.67533	0.8106	7.67517	1.4401	7.675	-0.1804	7.67517	0.69695	7.675	1.24595
7.68333	-1.19965	7.68367	1.83405	7.68367	-0.51315	7.68367	0.7701	7.6835	1.4271	7.68333	-0.2703	7.6835	0.6452	7.68333	1.154
7.69167	-1.20115	7.692	1.7835	7.692	-0.53385	7.692	0.7323	7.69183	1.4181	7.69167	-0.34675	7.69183	0.59865	7.69167	1.06725
7.7	-1.20445	7.70033	1.73175	7.70033	-0.55265	7.70033	0.6928	7.70017	1.40595	7.7	-0.41565	7.70017	0.55045	7.7	0.98875
7.70833	-1.2064	7.70867	1.6823	7.70867	-0.5722	7.70867	0.65765	7.7085	1.3974	7.70833	-0.47425	7.7085	0.5073	7.70833	0.9175
7.71667	-1.20725	7.717	1.63515	7.717	-0.58745	7.717	0.62615	7.71683	1.3889	7.71667	-0.52095	7.71683	0.46805	7.71667	0.85265
7.725	-1.20705	7.72533	1.59035	7.72533	-0.60645	7.72533	0.5956	7.72517	1.37765	7.725	-0.5655	7.72517	0.42905	7.725	0.79405
7.73333	-1.2094	7.73367	1.5451	7.73367	-0.622	7.73367	0.56825	7.7335	1.36995	7.73333	-0.6027	7.7335	0.39485	7.73333	0.74055
7.74167	-1.21125	7.742	1.5036	7.742	-0.63635	7.742	0.5405	7.74183	1.36075	7.74167	-0.6339	7.74183	0.35955	7.74167	0.69125
7.75	-1.21135	7.75033	1.45815	7.75033	-0.6522	7.75033	0.51565	7.75017	1.35135	7.75	-0.66155	7.75017	0.3277	7.75	0.6446
7.75833	-1.21435	7.75867	1.4121	7.75867	-0.6688	7.75867	0.48595	7.7585	1.34355	7.75833	-0.6904	7.7585	0.29525	7.75833	0.59775
7.76667	-1.21435	7.767	1.372	7.767	-0.68205	7.767	0.462	7.76683	1.33515	7.76667	-0.70965	7.76683	0.26495	7.76667	0.5583
7.775	-1.21645	7.77533	1.32885	7.77533	-0.6954	7.77533	0.43635	7.77517	1.3274	7.775	-0.7294	7.77517	0.23575	7.775	0.5198
7.78333	-1.2163	7.78367	1.28945	7.78367	-0.70735	7.78367	0.41465	7.7835	1.3188	7.78333	-0.7456	7.7835	0.2072	7.78333	0.4839
7.79167	-1.21785	7.792	1.2493	7.792	-0.7229	7.792	0.39135	7.79183	1.3105	7.79167	-0.76565	7.79183	0.1791	7.79167	0.44745
7.8	-1.22055	7.80033	1.2067	7.80033	-0.7386	7.80033	0.3669	7.80017	1.3012	7.8	-0.78355	7.80017	0.1498	7.8	0.4119
7.80833	-1.2237	7.80867	1.1669	7.80867	-0.74985	7.80867	0.3435	7.8085	1.294	7.80833	-0.7964	7.8085	0.1221	7.80833	0.3799
7.81667	-1.2235	7.817	1.12855	7.817	-0.76255	7.817	0.3226	7.81683	1.28495	7.81667	-0.80955	7.81683	0.09655	7.81667	0.3472
7.825	-1.22475	7.82533	1.09115	7.82533	-0.77715	7.82533	0.2998	7.82517	1.2765	7.825	-0.82245	7.82517	0.07065	7.825	0.3181
7.83333	-1.2282	7.83367	1.05265	7.83367	-0.7883	7.83367	0.2806	7.8335	1.26975	7.83333	-0.83655	7.8335	0.0445	7.83333	0.2862
7.84167	-1.2291	7.842	1.01465	7.842	-0.79995	7.842	0.2579	7.84183	1.2657	7.84167	-0.85	7.84183	0.01785	7.84167	0.25675
7.85	-1.2307	7.85033	0.9781	7.85033	-0.8118	7.85033	0.23665	7.85017	1.2571	7.85	-0.86255	7.85017	-0.00765	7.85	0.2252
7.85833	-1.23305	7.85867	0.942	7.85867	-0.8236	7.85867	0.2159	7.8585	1.25045	7.85833	-0.874	7.8585	-0.03065	7.85833	0.1982
7.86667	-1.2343	7.867	0.90825	7.867	-0.8335	7.867	0.1974	7.86683	1.2462	7.86667	-0.8847	7.86683	-0.05545	7.86667	0.17025
7.875	-1.23395	7.87533	0.87485	7.87533	-0.84695	7.87533	0.1787	7.87517	1.2401	7.875	-0.89605	7.87517	-0.07745	7.875	0.14305
7.88333	-1.23495	7.88367	0.84095	7.88367	-0.8561	7.88367	0.16045	7.8835	1.23325	7.88333	-0.90565	7.8835	-0.09905	7.88333	0.11765
7.89167	-1.2341	7.892	0.81105	7.892	-0.8626	7.892	0.14385	7.89183	1.23015	7.89167	-0.91355	7.89183	-0.11775	7.89167	0.0957
7.9	-1.23795	7.90033	0.7766	7.90033	-0.87515	7.90033	0.12415	7.90017	1.22235	7.9	-0.92205	7.90017	-0.14105	7.9	0.06935
7.90833	-1.23975	7.90867	0.74515	7.90867	-0.88385	7.90867	0.1073	7.9085	1.2151	7.90833	-0.93045	7.9085	-0.1621	7.90833	0.04415
7.91667	-1.24345	7.917	0.71465	7.917	-0.89245	7.917	0.09165	7.91683	1.2092	7.91667	-0.9367	7.91683	-0.18225	7.91667	0.0225
7.925	-1.2437	7.92533	0.68565	7.92533	-0.9003	7.92533	0.07545	7.92517	1.20065	7.925	-0.9457	7.92517	-0.20115	7.925	-0.00125
7.93333	-1.2436	7.93367	0.65735	7.93367	-0.9085	7.93367	0.06	7.9335	1.19335	7.93333	-0.95145	7.9335	-0.21925	7.93333	-0.0196
7.94167	-1.24395	7.942	0.62835	7.942	-0.91655	7.942	0.04655	7.94183	1.18545	7.94167	-0.9567	7.94183	-0.2361	7.94167	-0.0404
7.95	-1.2463	7.95033	0.5981	7.95033	-0.92655	7.95033	0.02985	7.95017	1.17885	7.95	-0.96445	7.95017	-0.2549	7.95	-0.06405
7.95833	-1.24845	7.95867	0.57	7.95867	-0.9351	7.95867	0.01545	7.9585	1.16945	7.95833	-0.96935	7.9585	-0.2725	7.95833	-0.08155
7.96667	-1.24935	7.967	0.54015	7.967	-0.94265	7.967	0.001	7.96683	1.16185	7.96667	-0.9754	7.96683	-0.29205	7.96667	-0.1009
7.975	-1.25	7.97533	0.5126	7.97533	-0.95015	7.97533	-0.0148	7.97517	1.1545	7.975	-0.98205	7.97517	-0.3088	7.975	-0.1214
7.98333	-1.2535	7.98367	0.48325	7.98367	-0.96085	7.98367	-0.0295	7.9835	1.14705	7.98333	-0.9912	7.9835	-0.326	7.98333	-0.1409
7.99167	-1.25445	7.992	0.45595	7.992	-0.968	7.992	-0.0453	7.99183	1.1391	7.99167	-0.99795	7.99183	-0.34345	7.99167	-0.1575
8	-1.25755	8.00033	0.42805	8.00033	-0.9749	8.00033	-0.05885	8.00017	1.1315	8	-1.0034	8.00017	-0.36035	8	-0.1732
8.00833	-1.2563	8.00867	0.40055	8.00867	-0.98245	8.00867	-0.07605	8.0085	1.1252	8.00833	-1.0121	8.0085	-0.376	8.00833	-0.18865
8.01667	-1.25975	8.017	0.37285	8.017	-0.98965	8.017	-0.08885	8.01683	1.1171	8.01667	-1.0191	8.01683	-0.3902	8.01667	-0.2038
8.025	-1.262	8.02533	0.3452	8.02533	-0.99765	8.02533	-0.1046	8.02517	1.11095	8.025	-1.02685	8.02517	-0.407	8.025	-0.21895
8.03333	-1.26425	8.03367	0.31735	8.03367	-1.0059	8.03367	-0.1198	8.0335	1.1038	8.03333	-1.03525	8.0335	-0.42375	8.03333	-0.23405
8.04167	-1.26615	8.042	0.2938	8.042	-1.0116	8.042	-0.1328	8.04183	1.0942	8.04167	-1.0413	8.04183	-0.43775	8.04167	-0.2423
8.05	-1.26885	8.05033	0.2659	8.05033	-1.01935	8.05033	-0.1474	8.05017	1.0882	8.05	-1.04955	8.05017	-0.4552	8.05	-0.25075
8.05833	-1.2679	8.05867	0.24005	8.05867	-1.026	8.05867	-0.1597	8.0585	1.08325	8.05833	-1.05585	8.0585	-0.4686	8.05833	-0.25645
8.06667	-1.2685	8.067	0.21655	8.067	-1.03155	8.067	-0.1727	8.06683	1.07405	8.06667	-1.0603	8.06683	-0.482	8.06667	-0.2581
8.075	-1.27155	8.07533	0.1937	8.07533	-1.03825	8.07533	-0.1862	8.07517	1.0687	8.075	-1.0677	8.07517	-0.49795	8.075	-0.2589
8.08333	-1.2708	8.08367	0.17105	8.08367	-1.0454	8.08367	-0.19845	8.0835	1.06515	8.08333	-1.0723	8.0835	-0.5091	8.08333	-0.25495
8.09167	-1.2753	8.092	0.14695	8.092	-1.05175	8.092	-0.21095	8.09183	1.05945	8.09167	-1.0781	8.09183	-0.5236	8.09167	-0.25315
8.1	-1.27445	8.10033	0.12615	8.10033	-1.05735	8.10033	-0.22215	8.10017	1.05295	8.1	-1.0828	8.10017	-0.5352	8.1	-0.25005
8.10833	-1.2762	8.10867	0.10695	8.10867	-1.06405	8.10867	-0.23105	8.1085	1.0488	8.10833	-1.0887	8.1085	-0.5481	8.10833	-0.24815
8.11667	-1.2764	8.117	0.0856	8.117	-1.0691	8.117	-0.2408	8.11683	1.0456	8.11667	-1.09165	8.11683	-0.5586	8.11667	-0.25345
8.125	-1.27735	8.12533	0.0686	8.12533	-1.0729	8.12533	-0.2495	8.12517	1.0388	8.125	-1.09465	8.12517	-0.57065	8.125	-0.25805
8.13333	-1.2772	8.13367	0.0501	8.13367	-1.07745	8.13367	-0.2577	8.1335	1.0364	8.13333	-1.0987	8.1335	-0.58035	8.13333	-0.27275
8.14167	-1.2806	8.142	0.0276	8.142	-1.08595	8.142	-0.2675	8.14183	1.03065	8.14167	-1.10565	8.14183	-0.5937	8.14167	-0.29395
8.15	-1.2777	8.15033	0.0112	8.15033	-1.08725	8.15033	-0.2709	8.15017	1.0254	8.15	-1.10485	8.15017	-0.59965	8.15	-0.31315
8.15833	-1.279	8.15867	-0.00585	8.15867	-1.0918	8.15867	-0.27745	8.1585	1.02355	8.15833	-1.1074	8.1585	-0.6087	8.15833	-0.33565
8.16667	-1.2799	8.167	-0.0233	8.167	-1.095	8.167	-0.2837	8.16683	1.01615	8.16667	-1.1126	8.16683	-0.6176	8.16667	-0.36025
8.175	-1.2804	8.17533	-0.04255	8.17533	-1.101	8.17533	-0.29075	8.17517	1.01045	8.175	-1.11645	8.17517	-0.6244	8.175	-0.3865
8.18333	-1.28135	8.18367	-0.0564	8.18367	-1.1026	8.18367	-0.29185	8.1835	1.00595	8.18333	-1.1152	8.1835	-0.628	8.18333	-0.40735
8.19167	-1.28075	8.192	-0.0726	8.192	-1.1065	8.192	-0.2973	8.19183	1.0001	8.19167	-1.11545	8.19183	-0.63165	8.19167	-0.43075
8.2	-1.2786	8.20033	-0.0843	8.20033	-1.1041	8.20033	-0.29765	8.20017	0.9952	8.2	-1.11355	8.20017	-0.6317	8.2	-0.4489
8.20833	-1.2805	8.20867	-0.1009	8.20867	-1.10745	8.20867	-0.3031	8.2085	0.9924	8.20833	-1.114	8.2085	-0.6336	8.20833	-0.4682
8.21667	-1.2804	8.217	-0.11725	8.217	-1.1094	8.217	-0.3087	8.21683	0.98925	8.21667	-1.1127	8.21683	-0.63455	8.21667	-0.4874
8.225	-1.28045	8.22533	-0.1311	8.22533	-1.1082	8.22533	-0.31435	8.22517	0.9814	8.225	-1.10915	8.22517	-0.6349	8.225	-0.50135
8.23333	-1.27995	8.23367	-0.1469	8.23367	-1.10845	8.23367	-0.32125	8.2335	0.9775	8.23333	-1.10605	8.2335	-0.6345	8.23333	-0.5162
8.24167	-1.28195	8.242	-0.1619	8.242	-1.10815	8.242	-0.3298	8.24183	0.9726	8.24167	-1.10495	8.24183	-0.6362	8.24167	-0.53195
8.25	-1.2825	8.25033	-0.1774	8.25033	-1.1074	8.25033	-0.3365	8.25017	0.9678	8.25	-1.10265	8.25017	-0.63765	8.25	-0.5463
8.25833	-1.28005	8.25867	-0.19155	8.25867	-1.10745	8.25867	-0.34545	8.2585	0.96375	8.25833	-1.10015	8.2585	-0.6402	8.25833	-0.5573
8.26667	-1.28215	8.267	-0.2072	8.267	-1.1121	8.267	-0.35635	8.26683	0.96095	8.26667	-1.10155	8.26683	-0.64785	8.26667	-0.5733
8.275	-1.2859	8.27533	-0.22405	8.27533	-1.1182	8.27533	-0.36925	8.27517	0.9584	8.275	-1.1056	8.27517	-0.6595	8.275	-0.59205
8.28333	-1.2894	8.28367	-0.2409	8.28367	-1.1216	8.28367	-0.38025	8.2835	0.95325	8.28333	-1.1087	8.2835	-0.66905	8.28333	-0.60705
8.29167	-1.28825	8.292	-0.254	8.292	-1.1259	8.292	-0.3898	8.29183	0.94995	8.29167	-1.1108	8.29183	-0.6804	8.29167	-0.61835
8.3	-1.29155	8.30033	-0.27295	8.30033	-1.13265	8.30033	-0.4025	8.30017	0.94565	8.3	-1.1179	8.30017	-0.69705	8.3	-0.63525
8.30833	-1.2952	8.30867	-0.2875	8.30867	-1.14065	8.30867	-0.4165	8.3085	0.94405	8.30833	-1.124	8.3085	-0.713	8.30833	-0.65215
8.31667	-1.29635	8.317	-0.30345	8.317	-1.14785	8.317	-0.42485	8.31683	0.94085	8.31667	-1.12975	8.31683	-0.729	8.31667	-0.66715
8.325	-1.2976	8.32533	-0.3191	8.32533	-1.15485	8.32533	-0.43635	8.32517	0.9414	8.325	-1.1385	8.32517	-0.7447	8.325	-0.68335
8.33333	-1.30195	8.33367	-0.3372	8.33367	-1.1634	8.33367	-0.4483	8.3335	0.94165	8.33333	-1.14705	8.3335	-0.76305	8.33333	-0.7004
8.34167	-1.303	8.342	-0.3501	8.342	-1.16945	8.342	-0.45605	8.34183	0.9462	8.34167	-1.1538	8.34183	-0.77615	8.34167	-0.71195
8.35	-1.3055	8.35033	-0.3668	8.35033	-1.17925	8.35033	-0.4653	8.35017	0.95435	8.35	-1.16165	8.35017	-0.79465	8.35	-0.72755
8.35833	-1.30475	8.35867	-0.3778	8.35867	-1.1847	8.35867	-0.47065	8.3585	0.96855	8.35833	-1.16545	8.3585	-0.80815	8.35833	-0.74055
8.36667	-1.3069	8.367	-0.39245	8.367	-1.1944	8.367	-0.4779	8.36683	0.9905	8.36667	-1.1716	8.36683	-0.82355	8.36667	-0.7533
8.375	-1.31105	8.37533	-0.40905	8.37533	-1.20305	8.37533	-0.4806	8.37517	1.01655	8.375	-1.1783	8.37517	-0.83725	8.375	-0.7679
8.38333	-1.3113	8.38367	-0.4214	8.38367	-1.21045	8.38367	-0.47835	8.3835	1.05045	8.38333	-1.17725	8.3835	-0.8482	8.38333	-0.77805
8.39167	-1.31135	8.392	-0.43345	8.392	-1.2146	8.392	-0.4646	8.39183	1.09105	8.39167	-1.1683	8.39183	-0.8549	8.39167	-0.78205
8.4	-1.3113	8.40033	-0.44625	8.40033	-1.2227	8.40033	-0.445	8.40017	1.13385	8.4	-1.15835	8.40017	-0.86105	8.4	-0.78725
8.40833	-1.314	8.40867	-0.45595	8.40867	-1.22835	8.40867	-0.4071	8.4085	1.1744	8.40833	-1.13385	8.4085	-0.86075	8.40833	-0.7859
8.41667	-1.30955	8.417	-0.4635	8.417	-1.2307	8.417	-0.3479	8.41683	1.21045	8.41667	-1.09015	8.41683	-0.85545	8.41667	-0.77675
8.425	-1.3093	8.42533	-0.4735	8.42533	-1.2359	8.42533	-0.26155	8.42517	1.23845	8.425	-1.0242	8.42517	-0.8403	8.425	-0.7583
8.43333	-1.30675	8.43367	-0.4785	8.43367	-1.2372	8.43367	-0.13885	8.4335	1.25655	8.43333	-0.91585	8.4335	-0.81515	8.43333	-0.72285
8.44167	-1.30335	8.442	-0.48165	8.442	-1.2385	8.442	0.024	8.44183	1.2567	8.44167	-0.7629	8.44183	-0.77495	8.44167	-0.6725
8.45	-1.29355	8.45033	-0.4813	8.45033	-1.23695	8.45033	0.22715	8.45017	1.2447	8.45	-0.55275	8.45017	-0.72065	8.45	-0.5988
8.45833	-1.28445	8.45867	-0.48	8.45867	-1.2368	8.45867	0.46855	8.4585	1.21955	8.45833	-0.27695	8.4585	-0.6513	8.45833	-0.5017
8.46667	-1.27085	8.467	-0.47495	8.467	-1.23235	8.467	0.73475	8.46683	1.185	8.46667	0.0657	8.46683	-0.5703	8.46667	-0.3813
8.475	-1.2565	8.47533	-0.4667	8.47533	-1.22805	8.47533	1.0073	8.47517	1.14085	8.475	0.46215	8.47517	-0.4779	8.475	-0.24565
8.48333	-1.2392	8.48367	-0.45675	8.48367	-1.2248	8.48367	1.2654	8.4835	1.09585	8.48333	0.8947	8.4835	-0.38915	8.48333	-0.10235
8.49167	-1.219	8.492	-0.44735	8.492	-1.21975	8.492	1.48395	8.49183	1.0511	8.49167	1.3353	8.49183	-0.3042	8.49167	0.04175
8.5	-1.1977	8.50033	-0.43915	8.50033	-1.213	8.50033	1.64395	8.50017	1.0066	8.5	1.74575	8.50017	-0.2358	8.5	0.16965
8.50833	-1.1803	8.50867	-0.4333	8.50867	-1.2096	8.50867	1.7334	8.5085	0.96905	8.50833	2.0925	8.5085	-0.1879	8.50833	0.266
8.51667	-1.16625	8.517	-0.4311	8.517	-1.2069	8.517	1.7472	8.51683	0.93735	8.51667	2.3423	8.51683	-0.1648	8.51667	0.3277
8.525	-1.16075	8.52533	-0.43395	8.52533	-1.2097	8.52533	1.69295	8.52517	0.9107	8.525	2.4811	8.52517	-0.17095	8.525	0.3477
8.53333	-1.15395	8.53367	-0.43955	8.53367	-1.2098	8.53367	1.58165	8.5335	0.88875	8.53333	2.50425	8.5335	-0.19765	8.53333	0.33055
8.54167	-1.1555	8.542	-0.45445	8.542	-1.2151	8.542	1.4236	8.54183	0.8698	8.54167	2.41705	8.54183	-0.24555	8.54167	0.2764
8.55	-1.15805	8.55033	-0.4683	8.55033	-1.22045	8.55033	1.24095	8.55017	0.85635	8.55	2.24125	8.55017	-0.30655	8.55	0.1973
8.55833	-1.1689	8.55867	-0.48745	8.55867	-1.2299	8.55867	1.0398	8.5585	0.846	8.55833	1.9959	8.5585	-0.37745	8.55833	0.0994
8.56667	-1.1807	8.567	-0.507	8.567	-1.2377	8.567	0.83465	8.56683	0.8384	8.56667	1.7081	8.56683	-0.4508	8.56667	-0.013
8.575	-1.19365	8.57533	-0.5301	8.57533	-1.2467	8.57533	0.6374	8.57517	0.8317	8.575	1.3959	8.57517	-0.52685	8.575	-0.12685
8.58333	-1.2081	8.58367	-0.54905	8.58367	-1.25755	8.58367	0.4528	8.5835	0.82735	8.58333	1.0854	8.5835	-0.59835	8.58333	-0.2373
8.59167	-1.22355	8.592	-0.5691	8.592	-1.26475	8.592	0.2806	8.59183	0.8223	8.59167	0.78385	8.59183	-0.66585	8.59167	-0.34545
8.6	-1.2371	8.60033	-0.58855	8.60033	-1.274	8.60033	0.13	8.60017	0.81835	8.6	0.50375	8.60017	-0.72695	8.6	-0.44395
8.60833	-1.2509	8.60867	-0.6077	8.60867	-1.2805	8.60867	-0.00575	8.6085	0.81575	8.60833	0.24585	8.6085	-0.7824	8.60833	-0.53395
8.61667	-1.2607	8.617	-0.6232	8.617	-1.28945	8.617	-0.12095	8.61683	0.8139	8.61667	0.01465	8.61683	-0.83005	8.61667	-0.61205
8.625	-1.2715	8.62533	-0.6399	8.62533	-1.29735	8.62533	-0.21855	8.62517	0.8122	8.625	-0.18935	8.62517	-0.87145	8.625	-0.683
8.63333	-1.28055	8.63367	-0.6534	8.63367	-1.30445	8.63367	-0.30355	8.6335	0.80655	8.63333	-0.3701	8.6335	-0.9077	8.63333	-0.74365
8.64167	-1.2909	8.642	-0.66895	8.642	-1.3111	8.642	-0.37375	8.64183	0.80735	8.64167	-0.5259	8.64183	-0.9388	8.64167	-0.79705
8.65	-1.29555	8.65033	-0.68115	8.65033	-1.31675	8.65033	-0.4298	8.65017	0.80655	8.65	-0.65605	8.65017	-0.96345	8.65	-0.8407
8.65833	-1.30075	8.65867	-0.69005	8.65867	-1.3218	8.65867	-0.47525	8.6585	0.80535	8.65833	-0.76875	8.6585	-0.9833	8.65833	-0.8781
8.66667	-1.30715	8.667	-0.6991	8.667	-1.3263	8.667	-0.5125	8.66683	0.8032	8.66667	-0.86265	8.66683	-1.0003	8.66667	-0.9079
8.675	-1.3101	8.67533	-0.709	8.67533	-1.3299	8.67533	-0.5412	8.67517	0.80355	8.675	-0.93995	8.67517	-1.01295	8.675	-0.93285
8.68333	-1.3128	8.68367	-0.71685	8.68367	-1.33175	8.68367	-0.56375	8.6835	0.79965	8.68333	-0.9988	8.6835	-1.0241	8.68333	-0.95165
8.69167	-1.31775	8.692	-0.7258	8.692	-1.33805	8.692	-0.5848	8.69183	0.80025	8.69167	-1.05	8.69183	-1.0366	8.69167	-0.96955
8.7	-1.31905	8.70033	-0.73265	8.70033	-1.34255	8.70033	-0.5984	8.70017	0.79815	8.7	-1.0869	8.70017	-1.0448	8.7	-0.97925
8.70833	-1.3206	8.70867	-0.73945	8.70867	-1.3453	8.70867	-0.6101	8.7085	0.79685	8.70833	-1.11345	8.7085	-1.052	8.70833	-0.9913
8.71667	-1.3222	8.717	-0.7495	8.717	-1.3506	8.717	-0.61805	8.71683	0.79405	8.71667	-1.13235	8.71683	-1.058	8.71667	-1.00005
8.725	-1.32315	8.72533	-0.75605	8.72533	-1.35535	8.72533	-0.62395	8.72517	0.7918	8.725	-1.14495	8.72517	-1.0641	8.725	-1.00885
8.73333	-1.32315	8.73367	-0.763	8.73367	-1.35705	8.73367	-0.62805	8.7335	0.78975	8.73333	-1.1508	8.7335	-1.06845	8.73333	-1.01605
8.74167	-1.3254	8.742	-0.7699	8.742	-1.3604	8.742	-0.63095	8.74183	0.78665	8.74167	-1.15395	8.74183	-1.0732	8.74167	-1.0214
8.75	-1.3279	8.75033	-0.7783	8.75033	-1.3656	8.75033	-0.6365	8.75017	0.7858	8.75	-1.1549	8.75017	-1.0801	8.75	-1.02885
8.75833	-1.3264	8.75867	-0.7827	8.75867	-1.36945	8.75867	-0.6401	8.7585	0.78375	8.75833	-1.1554	8.7585	-1.0859	8.75833	-1.03375
8.76667	-1.3304	8.767	-0.79225	8.767	-1.3731	8.767	-0.64795	8.76683	0.7817	8.76667	-1.15885	8.76683	-1.0934	8.76667	-1.04155
8.775	-1.33155	8.77533	-0.79825	8.77533	-1.3751	8.77533	-0.6531	8.77517	0.7815	8.775	-1.1599	8.77517	-1.10005	8.775	-1.04725
8.78333	-1.33065	8.78367	-0.8026	8.78367	-1.37655	8.78367	-0.6544	8.7835	0.77855	8.78333	-1.1593	8.7835	-1.1051	8.78333	-1.05095
8.79167	-1.33215	8.792	-0.8083	8.792	-1.37945	8.792	-0.663	8.79183	0.7768	8.79167	-1.16445	8.79183	-1.1103	8.79167	-1.05575
8.8	-1.33155	8.80033	-0.81425	8.80033	-1.38075	8.80033	-0.66845	8.80017	0.7731	8.8	-1.17055	8.80017	-1.11685	8.8	-1.06015
8.80833	-1.33225	8.80867	-0.82255	8.80867	-1.38625	8.80867	-0.6764	8.8085	0.7711	8.80833	-1.1794	8.8085	-1.12455	8.80833	-1.06625
8.81667	-1.3331	8.817	-0.8266	8.817	-1.388	8.817	-0.6802	8.81683	0.76855	8.81667	-1.18765	8.81683	-1.12955	8.81667	-1.0702
8.825	-1.33605	8.82533	-0.8364	8.82533	-1.3938	8.82533	-0.6899	8.82517	0.7675	8.825	-1.2025	8.82517	-1.13815	8.825	-1.0793
8.83333	-1.3366	8.83367	-0.84055	8.83367	-1.39675	8.83367	-0.6934	8.8335	0.76665	8.83333	-1.2135	8.8335	-1.146	8.83333	-1.0857
8.84167	-1.3377	8.842	-0.84665	8.842	-1.3981	8.842	-0.6987	8.84183	0.7648	8.84167	-1.2244	8.84183	-1.15305	8.84167	-1.09065
8.85	-1.33675	8.85033	-0.851	8.85033	-1.399	8.85033	-0.70045	8.85017	0.761	8.85	-1.2353	8.85017	-1.15645	8.85	-1.09505
8.85833	-1.3359	8.85867	-0.8535	8.85867	-1.4001	8.85867	-0.70485	8.8585	0.75885	8.85833	-1.24335	8.8585	-1.1608	8.85833	-1.0962
8.86667	-1.3383	8.867	-0.85985	8.867	-1.4039	8.867	-0.7118	8.86683	0.75785	8.86667	-1.25675	8.86683	-1.1681	8.86667	-1.10365
8.875	-1.33815	8.87533	-0.8624	8.87533	-1.4051	8.87533	-0.71695	8.87517	0.75545	8.875	-1.26575	8.87517	-1.1732	8.875	-1.10775
8.88333	-1.33935	8.88367	-0.869	8.88367	-1.40815	8.88367	-0.7262	8.8835	0.75255	8.88333	-1.277	8.8835	-1.17855	8.88333	-1.1146
8.89167	-1.3414	8.892	-0.8763	8.892	-1.4129	8.892	-0.7337	8.89183	0.75045	8.89167	-1.2862	8.89183	-1.1857	8.89167	-1.12025
8.9	-1.3395	8.90033	-0.8779	8.90033	-1.4139	8.90033	-0.7394	8.90017	0.74895	8.9	-1.2931	8.90017	-1.1891	8.9	-1.12215
8.90833	-1.33905	8.90867	-0.8849	8.90867	-1.4201	8.90867	-0.7493	8.9085	0.7486	8.90833	-1.29955	8.9085	-1.19405	8.90833	-1.1271
8.91667	-1.34055	8.917	-0.8889	8.917	-1.42155	8.917	-0.7581	8.91683	0.7459	8.91667	-1.3059	8.91683	-1.19805	8.91667	-1.13205
8.925	-1.3417	8.92533	-0.8933	8.92533	-1.4224	8.92533	-0.76635	8.92517	0.7471	8.925	-1.31205	8.92517	-1.2005	8.925	-1.13345
8.93333	-1.3426	8.93367	-0.89555	8.93367	-1.4229	8.93367	-0.77285	8.9335	0.7459	8.93333	-1.31605	8.9335	-1.203	8.93333	-1.1367
8.94167	-1.342	8.942	-0.9001	8.942	-1.42455	8.942	-0.7792	8.94183	0.74495	8.94167	-1.3192	8.94183	-1.20405	8.94167	-1.14015
8.95	-1.3402	8.95033	-0.9042	8.95033	-1.42695	8.95033	-0.7848	8.95017	0.7451	8.95	-1.3243	8.95017	-1.20855	8.95	-1.14275
8.95833	-1.3408	8.95867	-0.9062	8.95867	-1.42725	8.95867	-0.78875	8.9585	0.74335	8.95833	-1.329	8.9585	-1.21295	8.95833	-1.1447
8.96667	-1.34215	8.967	-0.9116	8.967	-1.42945	8.967	-0.7923	8.96683	0.7441	8.96667	-1.3322	8.96683	-1.2147	8.96667	-1.1447
8.975	-1.34415	8.97533	-0.91615	8.97533	-1.4316	8.97533	-0.7957	8.97517	0.74155	8.975	-1.3373	8.97517	-1.2189	8.975	-1.1467
8.98333	-1.3413	8.98367	-0.91795	8.98367	-1.43275	8.98367	-0.7947	8.9835	0.7391	8.98333	-1.3385	8.9835	-1.2184	8.98333	-1.1447
8.99167	-1.3425	8.992	-0.92295	8.992	-1.43605	8.992	-0.79825	8.99183	0.73725	8.99167	-1.34045	8.99183	-1.2224	8.99167	-1.146
9	-1.34175	9.00033	-0.92545	9.00033	-1.43525	9.00033	-0.8001	9.00017	0.73495	9	-1.3439	9.00017	-1.22225	9	-1.1452
9.00833	-1.34405	9.00867	-0.929	9.00867	-1.4392	9.00867	-0.802	9.0085	0.7336	9.00833	-1.34665	9.0085	-1.2256	9.00833	-1.1474
9.01667	-1.3452	9.017	-0.93415	9.017	-1.4432	9.017	-0.8038	9.01683	0.7314	9.01667	-1.35075	9.01683	-1.2275	9.01667	-1.1492
9.025	-1.3444	9.02533	-0.93755	9.02533	-1.4439	9.02533	-0.80615	9.02517	0.72975	9.025	-1.3524	9.02517	-1.2288	9.025	-1.1518
9.03333	-1.34215	9.03367	-0.9373	9.03367	-1.44255	9.03367	-0.80935	9.0335	0.7275	9.03333	-1.3515	9.0335	-1.22725	9.03333	-1.15075
9.04167	-1.34285	9.042	-0.9409	9.042	-1.44515	9.042	-0.81575	9.04183	0.7236	9.04167	-1.3549	9.04183	-1.2306	9.04167	-1.1532
9.05	-1.3444	9.05033	-0.9453	9.05033	-1.4458	9.05033	-0.82265	9.05017	0.7237	9.05	-1.3581	9.05017	-1.2326	9.05	-1.15715
9.05833	-1.34145	9.05867	-0.9479	9.05867	-1.44575	9.05867	-0.8272	9.0585	0.72105	9.05833	-1.358	9.0585	-1.23405	9.05833	-1.1602
9.06667	-1.342	9.067	-0.9518	9.067	-1.44815	9.067	-0.8373	9.06683	0.71985	9.06667	-1.36105	9.06683	-1.23565	9.06667	-1.1675
9.075	-1.3417	9.07533	-0.95395	9.07533	-1.4467	9.07533	-0.8413	9.07517	0.71715	9.075	-1.36185	9.07517	-1.23625	9.075	-1.17155
9.08333	-1.3424	9.08367	-0.95775	9.08367	-1.4528	9.08367	-0.8494	9.0835	0.7146	9.08333	-1.36785	9.0835	-1.24205	9.08333	-1.1814
9.09167	-1.34335	9.092	-0.96085	9.092	-1.45155	9.092	-0.85665	9.09183	0.71435	9.09167	-1.3711	9.09183	-1.2434	9.09167	-1.18725
9.1	-1.34355	9.10033	-0.96385	9.10033	-1.45435	9.10033	-0.86305	9.10017	0.71425	9.1	-1.3749	9.10017	-1.2456	9.1	-1.19325
9.10833	-1.34405	9.10867	-0.96675	9.10867	-1.4575	9.10867	-0.8721	9.1085	0.71245	9.10833	-1.3793	9.1085	-1.24995	9.10833	-1.2023
9.11667	-1.34625	9.117	-0.9711	9.117	-1.4601	9.117	-0.87755	9.11683	0.71265	9.11667	-1.3818	9.11683	-1.2533	9.11667	-1.20725
9.125	-1.3443	9.12533	-0.976	9.12533	-1.46465	9.12533	-0.8841	9.12517	0.7108	9.125	-1.38725	9.12517	-1.25685	9.125	-1.2129
9.13333	-1.34505	9.13367	-0.9806	9.13367	-1.46385	9.13367	-0.8915	9.1335	0.71105	9.13333	-1.3895	9.1335	-1.2607	9.13333	-1.21805
9.14167	-1.3448	9.142	-0.98235	9.142	-1.4657	9.142	-0.89525	9.14183	0.71	9.14167	-1.3912	9.14183	-1.26435	9.14167	-1.22375
9.15	-1.34705	9.15033	-0.9874	9.15033	-1.4687	9.15033	-0.90315	9.15017	0.71055	9.15	-1.39755	9.15017	-1.2706	9.15	-1.2305
9.15833	-1.3452	9.15867	-0.99105	9.15867	-1.47065	9.15867	-0.90645	9.1585	0.708	9.15833	-1.39725	9.1585	-1.27555	9.15833	-1.23415
9.16667	-1.346	9.167	-0.99455	9.167	-1.4721	9.167	-0.91055	9.16683	0.706	9.16667	-1.4016	9.16683	-1.27975	9.16667	-1.2375
9.175	-1.3466	9.17533	-0.9975	9.17533	-1.47405	9.17533	-0.9153	9.17517	0.7064	9.175	-1.4036	9.17517	-1.28365	9.175	-1.2399
9.18333	-1.34735	9.18367	-0.9994	9.18367	-1.474	9.18367	-0.91835	9.1835	0.70515	9.18333	-1.4055	9.1835	-1.2872	9.18333	-1.24475
9.19167	-1.3463	9.192	-1.00475	9.192	-1.4801	9.192	-0.9233	9.19183	0.7016	9.19167	-1.4077	9.19183	-1.29315	9.19167	-1.2481
9.2	-1.3468	9.20033	-1.0066	9.20033	-1.47885	9.20033	-0.9262	9.20017	0.7014	9.2	-1.4101	9.20017	-1.2966	9.2	-1.25
9.20833	-1.3487	9.20867	-1.0129	9.20867	-1.48455	9.20867	-0.93325	9.2085	0.69995	9.20833	-1.41365	9.2085	-1.3025	9.20833	-1.2559
9.21667	-1.34825	9.217	-1.01475	9.217	-1.48515	9.217	-0.9369	9.21683	0.6993	9.21667	-1.41625	9.21683	-1.3071	9.21667	-1.258
9.225	-1.3483	9.22533	-1.0185	9.22533	-1.48635	9.22533	-0.9384	9.22517	0.6977	9.225	-1.41655	9.22517	-1.3122	9.225	-1.2608
9.23333	-1.34505	9.23367	-1.0195	9.23367	-1.48595	9.23367	-0.94195	9.2335	0.6948	9.23333	-1.4181	9.2335	-1.3147	9.23333	-1.26295
9.24167	-1.3464	9.242	-1.02405	9.242	-1.49045	9.242	-0.94605	9.24183	0.6911	9.24167	-1.4214	9.24183	-1.3184	9.24167	-1.26585
9.25	-1.34545	9.25033	-1.02525	9.25033	-1.4899	9.25033	-0.9488	9.25017	0.6904	9.25	-1.4225	9.25017	-1.3221	9.25	-1.2687
9.25833	-1.3485	9.25867	-1.0311	9.25867	-1.4943	9.25867	-0.9539	9.2585	0.6891	9.25833	-1.42435	9.2585	-1.32615	9.25833	-1.2722
9.26667	-1.34525	9.267	-1.03095	9.267	-1.4942	9.267	-0.9542	9.26683	0.6863	9.26667	-1.42425	9.26683	-1.3266	9.26667	-1.2716
9.275	-1.3453	9.27533	-1.03545	9.27533	-1.4961	9.27533	-0.9579	9.27517	0.68435	9.275	-1.4263	9.27517	-1.3297	9.275	-1.27505
9.28333	-1.34545	9.28367	-1.03675	9.28367	-1.4968	9.28367	-0.95795	9.2835	0.68205	9.28333	-1.42745	9.2835	-1.33145	9.28333	-1.27635
9.29167	-1.34685	9.292	-1.0394	9.292	-1.49685	9.292	-0.9615	9.29183	0.67985	9.29167	-1.42795	9.29183	-1.33465	9.29167	-1.2783
9.3	-1.3449	9.30033	-1.04025	9.30033	-1.49815	9.30033	-0.9607	9.30017	0.6774	9.3	-1.4283	9.30017	-1.3376	9.3	-1.2799
9.30833	-1.3456	9.30867	-1.0433	9.30867	-1.49915	9.30867	-0.9619	9.3085	0.67525	9.30833	-1.4311	9.3085	-1.33835	9.30833	-1.2821
9.31667	-1.34525	9.317	-1.0434	9.317	-1.50065	9.317	-0.9591	9.31683	0.6734	9.31667	-1.4305	9.31683	-1.3392	9.31667	-1.2835
9.325	-1.34435	9.32533	-1.0464	9.32533	-1.501	9.32533	-0.9589	9.32517	0.67265	9.325	-1.4308	9.32517	-1.34115	9.325	-1.2846
9.33333	-1.34645	9.33367	-1.05085	9.33367	-1.50305	9.33367	-0.95755	9.3335	0.67025	9.33333	-1.4333	9.3335	-1.3434	9.33333	-1.2893
9.34167	-1.3468	9.342	-1.05385	9.342	-1.5059	9.342	-0.95245	9.34183	0.6667	9.34167	-1.4334	9.34183	-1.34545	9.34167	-1.2905
9.35	-1.34705	9.35033	-1.0582	9.35033	-1.50825	9.35033	-0.95125	9.35017	0.66635	9.35	-1.43335	9.35017	-1.34705	9.35	-1.2921
9.35833	-1.34695	9.35867	-1.0618	9.35867	-1.50955	9.35867	-0.9444	9.3585	0.6632	9.35833	-1.43485	9.3585	-1.3491	9.35833	-1.29225
9.36667	-1.34725	9.367	-1.0636	9.367	-1.51005	9.367	-0.93965	9.36683	0.6616	9.36667	-1.4368	9.36683	-1.35105	9.36667	-1.29455
9.375	-1.3474	9.37533	-1.06555	9.37533	-1.51175	9.37533	-0.9355	9.37517	0.6602	9.375	-1.4384	9.37517	-1.3532	9.375	-1.2959
9.38333	-1.3489	9.38367	-1.06935	9.38367	-1.51545	9.38367	-0.9307	9.3835	0.65995	9.38333	-1.4389	9.3835	-1.3582	9.38333	-1.29825
9.39167	-1.34645	9.392	-1.0706	9.392	-1.515	9.392	-0.92705	9.39183	0.65985	9.39167	-1.4386	9.39183	-1.35805	9.39167	-1.29745
9.4	-1.3483	9.40033	-1.0757	9.40033	-1.51855	9.40033	-0.92955	9.40017	0.65885	9.4	-1.44065	9.40017	-1.3629	9.4	-1.3008
9.40833	-1.35045	9.40867	-1.0785	9.40867	-1.5194	9.40867	-0.9354	9.4085	0.65805	9.40833	-1.4433	9.4085	-1.36765	9.40833	-1.3036
9.41667	-1.3501	9.417	-1.07975	9.417	-1.5207	9.417	-0.9353	9.41683	0.655	9.41667	-1.4413	9.41683	-1.3682	9.41667	-1.3005
9.425	-1.3488	9.42533	-1.0818	9.42533	-1.52275	9.42533	-0.94055	9.42517	0.6553	9.425	-1.4427	9.42517	-1.3705	9.425	-1.30545
9.43333	-1.3514	9.43367	-1.08755	9.43367	-1.52545	9.43367	-0.94775	9.4335	0.65385	9.43333	-1.4453	9.4335	-1.3761	9.43333	-1.3106
9.44167	-1.3507	9.442	-1.09085	9.442	-1.52795	9.442	-0.9573	9.44183	0.6534	9.44167	-1.4469	9.44183	-1.37885	9.44167	-1.3121
9.45	-1.35285	9.45033	-1.09375	9.45033	-1.52825	9.45033	-0.9667	9.45017	0.65345	9.45	-1.45025	9.45017	-1.38385	9.45	-1.3152
9.45833	-1.35175	9.45867	-1.09535	9.45867	-1.5302	9.45867	-0.97265	9.4585	0.654	9.45833	-1.4486	9.4585	-1.38245	9.45833	-1.3181
9.46667	-1.35355	9.467	-1.09865	9.467	-1.53125	9.467	-0.982	9.46683	0.65125	9.46667	-1.45385	9.46683	-1.3872	9.46667	-1.32175
9.475	-1.35275	9.47533	-1.101	9.47533	-1.53295	9.47533	-0.9887	9.47517	0.6538	9.475	-1.454	9.47517	-1.38985	9.475	-1.3243
9.48333	-1.35275	9.48367	-1.1043	9.48367	-1.53525	9.48367	-0.99575	9.4835	0.65255	9.48333	-1.45675	9.4835	-1.39325	9.48333	-1.3265
9.49167	-1.3553	9.492	-1.1059	9.492	-1.53625	9.492	-1.002	9.49183	0.6515	9.49167	-1.4568	9.49183	-1.39445	9.49167	-1.3282
9.5	-1.35825	9.50033	-1.10985	9.50033	-1.5403	9.50033	-1.0049	9.50017	0.6505	9.5	-1.4628	9.50017	-1.3972	9.5	-1.3308
9.50833	-1.35655	9.50867	-1.1118	9.50867	-1.53945	9.50867	-1.0022	9.5085	0.64925	9.50833	-1.46005	9.5085	-1.39815	9.50833	-1.32745
9.51667	-1.35785	9.517	-1.11345	9.517	-1.54045	9.517	-1.00235	9.51683	0.649	9.51667	-1.4622	9.51683	-1.39845	9.51667	-1.32545
9.525	-1.35665	9.52533	-1.1153	9.52533	-1.541	9.52533	-0.9921	9.52517	0.6488	9.525	-1.46075	9.52517	-1.3971	9.525	-1.3173
9.53333	-1.35915	9.53367	-1.12085	9.53367	-1.54595	9.53367	-0.98665	9.5335	0.6488	9.53333	-1.46365	9.5335	-1.39875	9.53333	-1.3123
9.54167	-1.3555	9.542	-1.12015	9.542	-1.5452	9.542	-0.973	9.54183	0.64835	9.54167	-1.45755	9.54183	-1.3948	9.54167	-1.29895
9.55	-1.3578	9.55033	-1.12225	9.55033	-1.5453	9.55033	-0.9616	9.55017	0.6482	9.55	-1.4562	9.55017	-1.3946	9.55	-1.28505
9.55833	-1.35805	9.55867	-1.12635	9.55867	-1.5486	9.55867	-0.94695	9.5585	0.64775	9.55833	-1.4547	9.5585	-1.39255	9.55833	-1.26885
9.56667	-1.35935	9.567	-1.1297	9.567	-1.55	9.567	-0.93425	9.56683	0.646	9.56667	-1.4513	9.56683	-1.39135	9.56667	-1.2512
9.575	-1.35835	9.57533	-1.13025	9.57533	-1.54905	9.57533	-0.9202	9.57517	0.6449	9.575	-1.4456	9.57517	-1.3885	9.575	-1.23275
9.58333	-1.3595	9.58367	-1.1312	9.58367	-1.5522	9.58367	-0.90765	9.5835	0.64455	9.58333	-1.43985	9.5835	-1.38585	9.58333	-1.2134
9.59167	-1.3582	9.592	-1.13345	9.592	-1.5526	9.592	-0.9012	9.59183	0.64515	9.59167	-1.43415	9.59183	-1.3848	9.59167	-1.19675
9.6	-1.35715	9.60033	-1.13495	9.60033	-1.5551	9.60033	-0.8991	9.60017	0.6422	9.6	-1.4276	9.60017	-1.3836	9.6	-1.1847
9.60833	-1.35715	9.60867	-1.13555	9.60867	-1.55425	9.60867	-0.89885	9.6085	0.64245	9.60833	-1.4222	9.6085	-1.3831	9.60833	-1.17385
9.61667	-1.3572	9.617	-1.13505	9.617	-1.55385	9.617	-0.90295	9.61683	0.6405	9.61667	-1.41705	9.61683	-1.3811	9.61667	-1.172
9.625	-1.3593	9.62533	-1.13705	9.62533	-1.5576	9.62533	-0.9104	9.62517	0.6414	9.625	-1.41565	9.62517	-1.38485	9.625	-1.1736
9.63333	-1.36105	9.63367	-1.14055	9.63367	-1.56065	9.63367	-0.9233	9.6335	0.63865	9.63333	-1.41395	9.6335	-1.38735	9.63333	-1.1796
9.64167	-1.36095	9.642	-1.13875	9.642	-1.5606	9.642	-0.93335	9.64183	0.63695	9.64167	-1.4119	9.64183	-1.3891	9.64167	-1.19195
9.65	-1.3614	9.65033	-1.14025	9.65033	-1.5613	9.65033	-0.94885	9.65017	0.6378	9.65	-1.41065	9.65017	-1.3913	9.65	-1.20485
9.65833	-1.36	9.65867	-1.13925	9.65867	-1.5603	9.65867	-0.9604	9.6585	0.63775	9.65833	-1.40985	9.6585	-1.3939	9.65833	-1.21755
9.66667	-1.361	9.667	-1.14205	9.667	-1.56225	9.667	-0.9774	9.66683	0.63465	9.66667	-1.41515	9.66683	-1.3973	9.66667	-1.23475
9.675	-1.35995	9.67533	-1.1444	9.67533	-1.563	9.67533	-0.9934	9.67517	0.63515	9.675	-1.42205	9.67517	-1.4025	9.675	-1.2522
9.68333	-1.36265	9.68367	-1.14515	9.68367	-1.56455	9.68367	-1.0069	9.6835	0.63245	9.68333	-1.4263	9.6835	-1.4045	9.68333	-1.2699
9.69167	-1.36285	9.692	-1.1456	9.692	-1.5656	9.692	-1.01995	9.69183	0.63365	9.69167	-1.4326	9.69183	-1.4089	9.69167	-1.2858
9.7	-1.3606	9.70033	-1.14595	9.70033	-1.5655	9.70033	-1.02985	9.70017	0.63295	9.7	-1.43465	9.70017	-1.41115	9.7	-1.2997
9.70833	-1.36195	9.70867	-1.148	9.70867	-1.5683	9.70867	-1.04255	9.7085	0.63195	9.70833	-1.4441	9.7085	-1.4177	9.70833	-1.31645
9.71667	-1.3629	9.717	-1.152	9.717	-1.57325	9.717	-1.0527	9.71683	0.6326	9.71667	-1.45285	9.71683	-1.4231	9.71667	-1.33065
9.725	-1.36155	9.72533	-1.1516	9.72533	-1.5704	9.72533	-1.05855	9.72517	0.6333	9.725	-1.4554	9.72517	-1.4211	9.725	-1.3397
9.73333	-1.36125	9.73367	-1.1521	9.73367	-1.572	9.73367	-1.0638	9.7335	0.63085	9.73333	-1.4625	9.7335	-1.4252	9.73333	-1.34695
9.74167	-1.36245	9.742	-1.1528	9.742	-1.5705	9.742	-1.0699	9.74183	0.631	9.74167	-1.46615	9.74183	-1.42595	9.74167	-1.3555
9.75	-1.3633	9.75033	-1.1558	9.75033	-1.5721	9.75033	-1.0742	9.75017	0.6304	9.75	-1.4736	9.75017	-1.42705	9.75	-1.36185
9.75833	-1.3599	9.75867	-1.15405	9.75867	-1.5717	9.75867	-1.07555	9.7585	0.6313	9.75833	-1.47435	9.7585	-1.42715	9.75833	-1.3646
9.76667	-1.36215	9.767	-1.1575	9.767	-1.5722	9.767	-1.08045	9.76683	0.63395	9.76667	-1.47985	9.76683	-1.42895	9.76667	-1.36825
9.775	-1.3622	9.77533	-1.15805	9.77533	-1.5737	9.77533	-1.0818	9.77517	0.6349	9.775	-1.485	9.77517	-1.4296	9.775	-1.3727
9.78333	-1.36085	9.78367	-1.15675	9.78367	-1.5736	9.78367	-1.0804	9.7835	0.6366	9.78333	-1.48545	9.7835	-1.42775	9.78333	-1.37375
9.79167	-1.3615	9.792	-1.15765	9.792	-1.57435	9.792	-1.0822	9.79183	0.63695	9.79167	-1.4895	9.79183	-1.42665	9.79167	-1.37465
9.8	-1.36335	9.80033	-1.1588	9.80033	-1.57675	9.80033	-1.08345	9.80017	0.63995	9.8	-1.49215	9.80017	-1.4264	9.8	-1.3771
9.80833	-1.3582	9.80867	-1.1563	9.80867	-1.575	9.80867	-1.0791	9.8085	0.64255	9.80833	-1.49075	9.8085	-1.41945	9.80833	-1.37495
9.81667	-1.36025	9.817	-1.1567	9.817	-1.57605	9.817	-1.07935	9.81683	0.64675	9.81667	-1.4928	9.81683	-1.41645	9.81667	-1.373
9.825	-1.35895	9.82533	-1.154	9.82533	-1.57775	9.82533	-1.0775	9.82517	0.6445	9.825	-1.4962	9.82517	-1.41205	9.825	-1.37395
9.83333	-1.35965	9.83367	-1.1534	9.83367	-1.5788	9.83367	-1.0766	9.8335	0.6548	9.83333	-1.4991	9.8335	-1.40865	9.83333	-1.3725
9.84167	-1.35885	9.842	-1.1525	9.842	-1.58065	9.842	-1.0728	9.84183	0.66115	9.84167	-1.5	9.84183	-1.4041	9.84167	-1.37005
9.85	-1.3584	9.85033	-1.1488	9.85033	-1.5801	9.85033	-1.0692	9.85017	0.66525	9.85	-1.5	9.85017	-1.3959	9.85	-1.36745
9.85833	-1.3568	9.85867	-1.14535	9.85867	-1.5829	9.85867	-1.06575	9.8585	0.67265	9.85833	-1.50025	9.8585	-1.3897	9.85833	-1.36405
9.86667	-1.35895	9.867	-1.14265	9.867	-1.58425	9.867	-1.06025	9.86683	0.6785	9.86667	-1.5029	9.86683	-1.3789	9.86667	-1.36185
9.875	-1.36125	9.87533	-1.1412	9.87533	-1.586	9.87533	-1.04735	9.87517	0.68485	9.875	-1.50565	9.87517	-1.36075	9.875	-1.3588
9.88333	-1.3582	9.88367	-1.13535	9.88367	-1.58475	9.88367	-1.01725	9.8835	0.6917	9.88333	-1.506	9.8835	-1.33185	9.88333	-1.3525
9.89167	-1.35895	9.892	-1.1282	9.892	-1.585	9.892	-0.98015	9.89183	0.7052	9.89167	-1.50505	9.89183	-1.30365	9.89167	-1.34265
9.9	-1.35635	9.90033	-1.11515	9.90033	-1.58555	9.90033	-0.9345	9.90017	0.7311	9.9	-1.50735	9.90017	-1.27525	9.9	-1.31675
9.90833	-1.35865	9.90867	-1.092	9.90867	-1.58585	9.90867	-0.89085	9.9085	0.7778	9.90833	-1.50875	9.9085	-1.2635	9.90833	-1.2756
9.91667	-1.3583	9.917	-1.0591	9.917	-1.58745	9.917	-0.86175	9.91683	0.8358	9.91667	-1.5078	9.91683	-1.26465	9.91667	-1.2227
9.925	-1.35645	9.92533	-1.0227	9.92533	-1.58595	9.92533	-0.8509	9.92517	0.87335	9.925	-1.50635	9.92517	-1.2789	9.925	-1.16655
9.93333	-1.354	9.93367	-0.98895	9.93367	-1.58505	9.93367	-0.85845	9.9335	0.8764	9.93333	-1.5067	9.9335	-1.29655	9.93333	-1.1291
9.94167	-1.3543	9.942	-0.97445	9.942	-1.5862	9.942	-0.87875	9.94183	0.86185	9.94167	-1.5084	9.94183	-1.3196	9.94167	-1.122
9.95	-1.35335	9.95033	-0.9745	9.95033	-1.5857	9.95033	-0.89965	9.95017	0.84225	9.95	-1.50685	9.95017	-1.34045	9.95	-1.1349
9.95833	-1.35345	9.95867	-0.98415	9.95867	-1.5859	9.95867	-0.9144	9.9585	0.8329	9.95833	-1.50625	9.9585	-1.35265	9.95833	-1.1555
9.96667	-1.35155	9.967	-1.0053	9.967	-1.5855	9.967	-0.92665	9.96683	0.8289	9.96667	-1.50615	9.96683	-1.36605	9.96667	-1.1817
9.975	-1.351	9.97533	-1.02835	9.97533	-1.58785	9.97533	-0.9347	9.97517	0.81565	9.975	-1.50795	9.97517	-1.3813	9.975	-1.204
9.98333	-1.3501	9.98367	-1.04715	9.98367	-1.58955	9.98367	-0.94555	9.9835	0.78725	9.98333	-1.5092	9.9835	-1.42155	9.98333	-1.22105
9.99167	-1.34915	9.992	-1.06415	9.992	-1.58705	9.992	-0.9774	9.99183	0.75085	9.99167	-1.50915	9.99183	-1.42645	9.99167	-1.231
10	-1.3472	10.0003	-1.07625	10.0003	-1.58975	10.0003	-1.0136	10.0002	0.71065	10	-1.51	10.0002	-1.0891	10	-1.2442
10.0083	-1.34605	10.0087	-1.1015	10.0087	-1.592	10.0087	-0.7722	10.0085	0.76215	10.0083	-1.51055	10.0085	-0.33825	10.0083	-1.28795
10.0167	-1.34075	10.017	-1.15145	10.017	-1.59285	10.017	-0.0508	10.0168	1.14675	10.0167	-1.5118	10.0168	0.5016	10.0167	-1.3529
10.025	-1.33405	10.0253	-1.08075	10.0253	-1.59325	10.0253	0.83845	10.0252	1.77405	10.025	-1.51285	10.0252	1.2242	10.025	-1.1835
10.0333	-1.3277	10.0337	-0.55585	10.0337	-1.5929	10.0337	1.6271	10.0335	2.37645	10.0333	-1.5148	10.0335	1.78865	10.0333	-0.5172
10.0417	-1.3186	10.042	0.3097	10.042	-1.59215	10.042	2.24645	10.0418	2.85965	10.0417	-1.5151	10.0418	2.21675	10.0417	0.35995
10.05	-1.3147	10.0503	1.17015	10.0503	-1.5935	10.0503	2.71355	10.0502	3.22885	10.05	-1.51635	10.0502	2.5443	10.05	1.1584
10.0583	-1.31585	10.0587	1.8762	10.0587	-1.5949	10.0587	3.06715	10.0585	3.5062	10.0583	-1.5179	10.0585	2.8014	10.0583	1.7947
10.0667	-1.31895	10.067	2.4275	10.067	-1.594	10.067	3.3405	10.0668	3.74685	10.0667	-1.52025	10.0668	3.0254	10.0667	2.2768
10.075	-1.3269	10.0753	2.8454	10.0753	-1.5902	10.0753	3.5659	10.0752	3.96905	10.075	-1.51915	10.0752	3.24255	10.075	2.64325
10.0833	-1.336	10.0837	3.1711	10.0837	-1.5842	10.0837	3.77935	10.0835	4.15235	10.0833	-1.5199	10.0835	3.4423	10.0833	2.9265
10.0917	-1.3479	10.092	3.4275	10.092	-1.58105	10.092	3.9809	10.0918	4.2792	10.0917	-1.52235	10.0918	3.60405	10.0917	3.1597
10.1	-1.3524	10.1003	3.6627	10.1003	-1.5705	10.1003	4.1577	10.1002	4.3594	10.1	-1.5199	10.1002	3.7264	10.1	3.38405
10.1083	-1.36105	10.1087	3.89015	10.1087	-1.56655	10.1087	4.29285	10.1085	4.41015	10.1083	-1.5196	10.1085	3.8107	10.1083	3.59675
10.1167	-1.3676	10.117	4.09455	10.117	-1.56745	10.117	4.3889	10.1168	4.44445	10.1167	-1.51775	10.1168	3.872	10.1167	3.77845
10.125	-1.37485	10.1253	4.2596	10.1253	-1.5702	10.1253	4.4539	10.1252	4.4676	10.125	-1.51335	10.1252	3.91645	10.125	3.9155
10.1333	-1.38275	10.1337	4.37855	10.1337	-1.5764	10.1337	4.50065	10.1335	4.4816	10.1333	-1.5041	10.1335	3.9466	10.1333	4.0135
10.1417	-1.3951	10.142	4.4639	10.142	-1.58345	10.142	4.53235	10.1418	4.4927	10.1417	-1.49425	10.1418	3.9701	10.1417	4.0825
10.15	-1.4298	10.1503	4.5212	10.1503	-1.59415	10.1503	4.55635	10.1502	4.499	10.15	-1.4832	10.1502	3.98665	10.15	4.12675
10.1583	-1.42025	10.1587	4.56295	10.1587	-1.60475	10.1587	4.5727	10.1585	4.5028	10.1583	-1.47305	10.1585	4.0004	10.1583	4.16175
10.1667	-1.0935	10.167	4.5946	10.167	-1.61105	10.167	4.5882	10.1668	4.5023	10.1667	-1.46765	10.1668	4.01195	10.1667	4.18745
10.175	-0.37425	10.1753	4.61795	10.1753	-1.62025	10.1753	4.59585	10.1752	4.5022	10.175	-1.4673	10.1752	4.0185	10.175	4.2049
10.1833	0.4503	10.1837	4.6354	10.1837	-1.6292	10.1837	4.6033	10.1835	4.4978	10.1833	-1.4733	10.1835	4.0251	10.1833	4.21995
10.1917	1.1812	10.192	4.64865	10.192	-1.64055	10.192	4.60855	10.1918	4.4927	10.1917	-1.4782	10.1918	4.02815	10.1917	4.23245
10.2	1.77105	10.2003	4.66005	10.2003	-1.64765	10.2003	4.6118	10.2002	4.48715	10.2	-1.4857	10.2002	4.03135	10.2	4.24265
10.2083	2.22655	10.2087	4.66405	10.2087	-1.6598	10.2087	4.61215	10.2085	4.48185	10.2083	-1.49635	10.2085	4.03215	10.2083	4.245
10.2167	2.58625	10.217	4.6729	10.217	-1.66715	10.217	4.61455	10.2168	4.4763	10.2167	-1.5017	10.2168	4.033	10.2167	4.253
10.225	2.88355	10.2253	4.69005	10.2253	-1.6839	10.2253	4.62895	10.2252	4.47015	10.225	-1.4947	10.2252	4.043	10.225	4.26875
10.2333	3.1459	10.2337	4.7098	10.2337	-1.56755	10.2337	4.64435	10.2335	4.46475	10.2333	-1.48645	10.2335	4.0605	10.2333	4.28985
10.2417	3.38045	10.242	4.7134	10.242	-1.04825	10.242	4.6432	10.2418	4.46215	10.2417	-1.4926	10.2418	4.0586	10.2417	4.2943
10.25	3.58165	10.2503	4.69085	10.2503	-0.28155	10.2503	4.61785	10.2502	4.45625	10.25	-1.52605	10.2502	4.03265	10.25	4.26945
10.2583	3.7714	10.2587	4.6839	10.2587	0.4779	10.2587	4.60635	10.2585	4.45125	10.2583	-1.5391	10.2585	4.024	10.2583	4.2635
10.2667	3.92415	10.267	4.6862	10.267	1.10245	10.267	4.6056	10.2668	4.4479	10.2667	-1.5435	10.2668	4.02375	10.2667	4.26375
10.275	4.02295	10.2753	4.6705	10.2753	1.5601	10.2753	4.5889	10.2752	4.44625	10.275	-1.55615	10.2752	4.00505	10.275	4.2502
10.2833	4.0924	10.2837	4.6586	10.2837	1.90825	10.2837	4.5766	10.2835	4.4401	10.2833	-1.57225	10.2835	3.9925	10.2833	4.241
10.2917	4.14155	10.292	4.65305	10.292	2.1811	10.292	4.5662	10.2918	4.43485	10.2917	-1.5817	10.2918	3.9832	10.2917	4.23375
10.3	4.17895	10.3003	4.64685	10.3003	2.42245	10.3003	4.5603	10.3002	4.43045	10.3	-1.34335	10.3002	3.9773	10.3	4.2256
10.3083	4.20435	10.3087	4.6386	10.3087	2.6502	10.3087	4.5507	10.3085	4.42635	10.3083	-0.66925	10.3085	3.9686	10.3083	4.2183
10.3167	4.2262	10.317	4.6299	10.317	2.8456	10.317	4.5439	10.3168	4.4201	10.3167	0.1724	10.3168	3.9607	10.3167	4.21145
10.325	4.23845	10.3253	4.6236	10.3253	2.99285	10.3253	4.53225	10.3252	4.41315	10.325	0.925551	10.3252	3.95115	10.325	4.20425
10.3333	4.24905	10.3337	4.61485	10.3337	3.0975	10.3337	4.52175	10.3335	4.40525	10.3333	1.51405	10.3335	3.94185	10.3333	4.1966
10.3417	4.25425	10.342	4.60365	10.342	3.1674	10.342	4.5108	10.3418	4.4011	10.3417	1.95775	10.3418	3.9328	10.3417	4.1888
10.35	4.2576	10.3503	4.5954	10.3503	3.21125	10.3503	4.4991	10.3502	4.3912	10.35	2.2906	10.3502	3.9218	10.35	4.17765
10.3583	4.2595	10.3587	4.5856	10.3587	3.2459	10.3587	4.49125	10.3585	4.38195	10.3583	2.55725	10.3585	3.9117	10.3583	4.17065
10.3667	4.2615	10.367	4.57755	10.367	3.2685	10.367	4.4814	10.3668	4.37485	10.3667	2.80025	10.3668	3.9039	10.3667	4.16175
10.375	4.25875	10.3753	4.56455	10.3753	3.2841	10.3753	4.46885	10.3752	4.364	10.375	3.02195	10.3752	3.89275	10.375	4.151
10.3833	4.2563	10.3837	4.5551	10.3837	3.2956	10.3837	4.4587	10.3835	4.3535	10.3833	3.2093	10.3835	3.8837	10.3833	4.1421
10.3917	4.25315	10.392	4.5441	10.392	3.30325	10.392	4.4457	10.3918	4.3418	10.3917	3.34515	10.3918	3.87275	10.3917	4.13115
10.4	4.2487	10.4003	4.5316	10.4003	3.30735	10.4003	4.43565	10.4002	4.33075	10.4	3.43865	10.4002	3.8612	10.4	4.11925
10.4083	4.24055	10.4087	4.51965	10.4087	3.3081	10.4087	4.42185	10.4085	4.3178	10.4083	3.4991	10.4085	3.8482	10.4083	4.10925
10.4167	4.2358	10.417	4.5075	10.417	3.3062	10.417	4.40785	10.4168	4.30735	10.4167	3.54135	10.4168	3.8354	10.4167	4.0984
10.425	4.22655	10.4253	4.4936	10.4253	3.30575	10.4253	4.3953	10.4252	4.2941	10.425	3.5682	10.4252	3.823	10.425	4.08475
10.4333	4.2138	10.4337	4.4795	10.4337	3.302	10.4337	4.3803	10.4335	4.27995	10.4333	3.58535	10.4335	3.8092	10.4333	4.0735
10.4417	4.20655	10.442	4.46575	10.442	3.29555	10.442	4.3669	10.4418	4.26615	10.4417	3.59585	10.4418	3.79735	10.4417	4.058
10.45	4.19665	10.4503	4.4527	10.4503	3.2904	10.4503	4.3531	10.4502	4.2543	10.45	3.6038	10.4502	3.78445	10.45	4.04795
10.4583	4.1883	10.4587	4.44075	10.4587	3.28385	10.4587	4.3408	10.4585	4.23975	10.4583	3.6072	10.4585	3.77345	10.4583	4.0353
10.4667	4.1746	10.467	4.42145	10.467	3.2742	10.467	4.32245	10.4668	4.228	10.4667	3.6093	10.4668	3.75475	10.4667	4.01995
10.475	4.1655	10.4753	4.4083	10.4753	3.26845	10.4753	4.3092	10.4752	4.2139	10.475	3.60895	10.4752	3.74455	10.475	4.0064
10.4833	4.1541	10.4837	4.3924	10.4837	3.25935	10.4837	4.295	10.4835	4.19645	10.4833	3.60665	10.4835	3.7305	10.4833	3.99335
10.4917	4.1416	10.492	4.37815	10.492	3.24855	10.492	4.278	10.4918	4.18375	10.4917	3.6016	10.4918	3.71585	10.4917	3.97805
10.5	4.12905	10.5003	4.3608	10.5003	3.23915	10.5003	4.26275	10.5002	4.1684	10.5	3.59905	10.5002	3.7023	10.5	3.96645
10.5083	4.11375	10.5087	4.34435	10.5087	3.22785	10.5087	4.2463	10.5085	4.15465	10.5083	3.59395	10.5085	3.6828	10.5083	3.94765
10.5167	4.10155	10.517	4.3288	10.517	3.21735	10.517	4.2301	10.5168	4.13935	10.5167	3.5837	10.5168	3.66965	10.5167	3.93625
10.525	4.08985	10.5253	4.31195	10.5253	3.20645	10.5253	4.21515	10.5252	4.1244	10.525	3.57645	10.5252	3.6555	10.525	3.92065
10.5333	4.07295	10.5337	4.2942	10.5337	3.1932	10.5337	4.19635	10.5335	4.10705	10.5333	3.5637	10.5335	3.6374	10.5333	3.90265
10.5417	4.06035	10.542	4.2774	10.542	3.18135	10.542	4.18055	10.5418	4.0912	10.5417	3.5544	10.5418	3.6215	10.5417	3.8905
10.55	4.04235	10.5503	4.25605	10.5503	3.1656	10.5503	4.1611	10.5502	4.07735	10.55	3.5414	10.5502	3.60215	10.55	3.86885
10.5583	4.03135	10.5587	4.24	10.5587	3.1538	10.5587	4.14645	10.5585	4.0595	10.5583	3.53235	10.5585	3.589	10.5583	3.85485
10.5667	4.01285	10.567	4.21835	10.567	3.138	10.567	4.1239	10.5668	4.04395	10.5667	3.51795	10.5668	3.56665	10.5667	3.8347
10.575	3.99775	10.5753	4.19945	10.5753	3.12265	10.5753	4.10565	10.5752	4.02705	10.575	3.50365	10.5752	3.549	10.575	3.8178
10.5833	3.98155	10.5837	4.18085	10.5837	3.1095	10.5837	4.0866	10.5835	4.01045	10.5833	3.4927	10.5835	3.5322	10.5833	3.7996
10.5917	3.96645	10.592	4.16	10.592	3.0923	10.592	4.0666	10.5918	3.9938	10.5917	3.4785	10.5918	3.51515	10.5917	3.78405
10.6	3.9477	10.6003	4.1392	10.6003	3.077	10.6003	4.04745	10.6002	3.97795	10.6	3.46205	10.6002	3.49455	10.6	3.7629
10.6083	3.93475	10.6087	4.123	10.6087	3.0633	10.6087	4.03005	10.6085	3.96165	10.6083	3.45005	10.6085	3.47915	10.6083	3.74795
10.6167	3.9158	10.617	4.1012	10.617	3.0456	10.617	4.0113	10.6168	3.9441	10.6167	3.4336	10.6168	3.46025	10.6167	3.72995
10.625	3.89935	10.6253	4.08125	10.6253	3.02875	10.6253	3.9899	10.6252	3.92855	10.625	3.41695	10.6252	3.4413	10.625	3.71105
10.6333	3.88145	10.6337	4.0605	10.6337	3.0123	10.6337	3.9715	10.6335	3.91295	10.6333	3.3998	10.6335	3.42135	10.6333	3.6913
10.6417	3.86515	10.642	4.04315	10.642	2.9978	10.642	3.95335	10.6418	3.8949	10.6417	3.38565	10.6418	3.40385	10.6417	3.6756
10.65	3.84735	10.6503	4.02165	10.6503	2.9764	10.6503	3.9337	10.6502	3.88035	10.65	3.36455	10.6502	3.3838	10.65	3.65465
10.6583	3.8264	10.6587	3.99805	10.6587	2.95545	10.6587	3.91025	10.6585	3.86365	10.6583	3.3457	10.6585	3.36365	10.6583	3.6351
10.6667	3.8105	10.667	3.97895	10.667	2.93695	10.667	3.89035	10.6668	3.8461	10.6667	3.32735	10.6668	3.34545	10.6667	3.61615
10.675	3.7916	10.6753	3.95635	10.6753	2.91775	10.6753	3.8677	10.6752	3.8275	10.675	3.3069	10.6752	3.3228	10.675	3.59685
10.6833	3.77185	10.6837	3.9346	10.6837	2.8967	10.6837	3.84395	10.6835	3.80885	10.6833	3.28365	10.6835	3.30295	10.6833	3.57505
10.6917	3.7529	10.692	3.91135	10.692	2.87475	10.692	3.82165	10.6918	3.7923	10.6917	3.2634	10.6918	3.28185	10.6917	3.55635
10.7	3.7325	10.7003	3.8907	10.7003	2.8527	10.7003	3.7972	10.7002	3.7763	10.7	3.24175	10.7002	3.261	10.7	3.5337
10.7083	3.71395	10.7087	3.8666	10.7087	2.8299	10.7087	3.77145	10.7085	3.7597	10.7083	3.216	10.7085	3.23735	10.7083	3.5111
10.7167	3.69045	10.717	3.8436	10.717	2.80655	10.717	3.7479	10.7168	3.7418	10.7167	3.19365	10.7168	3.21355	10.7167	3.4908
10.725	3.6677	10.7253	3.81775	10.7253	2.7799	10.7253	3.72225	10.7252	3.7237	10.725	3.166	10.7252	3.188	10.725	3.4652
10.7333	3.64615	10.7337	3.7937	10.7337	2.75605	10.7337	3.6957	10.7335	3.7052	10.7333	3.1435	10.7335	3.1649	10.7333	3.44315
10.7417	3.62265	10.742	3.76805	10.742	2.7307	10.742	3.6669	10.7418	3.68635	10.7417	3.11445	10.7418	3.1412	10.7417	3.4181
10.75	3.6004	10.7503	3.74145	10.7503	2.70375	10.7503	3.63805	10.7502	3.66765	10.75	3.0893	10.7502	3.1153	10.75	3.3931
10.7583	3.5726	10.7587	3.71115	10.7587	2.678	10.7587	3.60605	10.7585	3.6447	10.7583	3.06	10.7585	3.08685	10.7583	3.36635
10.7667	3.545	10.767	3.67975	10.767	2.64735	10.767	3.57385	10.7668	3.6268	10.7667	3.0299	10.7668	3.0575	10.7667	3.3369
10.775	3.5177	10.7753	3.65175	10.7753	2.62015	10.7753	3.53885	10.7752	3.6052	10.775	2.9987	10.7752	3.02755	10.775	3.30695
10.7833	3.48885	10.7837	3.61815	10.7837	2.5889	10.7837	3.5059	10.7835	3.5806	10.7833	2.97065	10.7835	2.9939	10.7833	3.2755
10.7917	3.45735	10.792	3.58335	10.792	2.55825	10.792	3.46985	10.7918	3.55665	10.7917	2.938	10.7918	2.9629	10.7917	3.24495
10.8	3.42195	10.8003	3.5481	10.8003	2.52695	10.8003	3.4319	10.8002	3.534	10.8	2.9046	10.8002	2.9286	10.8	3.20905
10.8083	3.3881	10.8087	3.5106	10.8087	2.49545	10.8087	3.39415	10.8085	3.5061	10.8083	2.87495	10.8085	2.89345	10.8083	3.1769
10.8167	3.35195	10.817	3.47195	10.817	2.4634	10.817	3.35485	10.8168	3.4806	10.8167	2.8405	10.8168	2.8553	10.8167	3.13915
10.825	3.3155	10.8253	3.43415	10.8253	2.43225	10.8253	3.3146	10.8252	3.45275	10.825	2.8073	10.8252	2.8188	10.825	3.1015
10.8333	3.278	10.8337	3.39435	10.8337	2.40005	10.8337	3.27385	10.8335	3.42395	10.8333	2.7759	10.8335	2.78125	10.8333	3.06495
10.8417	3.23895	10.842	3.3524	10.842	2.3691	10.842	3.235	10.8418	3.3985	10.8417	2.7467	10.8418	2.74145	10.8417	3.02625
10.85	3.1981	10.8503	3.3079	10.8503	2.3371	10.8503	3.1925	10.8502	3.3657	10.85	2.7183	10.8502	2.7016	10.85	2.9864
10.8583	3.15715	10.8587	3.2659	10.8587	2.3074	10.8587	3.1491	10.8585	3.33375	10.8583	2.6908	10.8585	2.66295	10.8583	2.9454
10.8667	3.11515	10.867	3.22045	10.867	2.27725	10.867	3.10335	10.8668	3.30505	10.8667	2.66815	10.8668	2.6186	10.8667	2.9028
10.875	3.07525	10.8753	3.17565	10.8753	2.2493	10.8753	3.0594	10.8752	3.27345	10.875	2.65165	10.8752	2.5789	10.875	2.86085
10.8833	3.0297	10.8837	3.1295	10.8837	2.2236	10.8837	3.0124	10.8835	3.24155	10.8833	2.6393	10.8835	2.53565	10.8833	2.8189
10.8917	2.9861	10.892	3.08505	10.892	2.2015	10.892	2.9688	10.8918	3.2093	10.8917	2.63415	10.8918	2.494	10.8917	2.7746
10.9	2.94305	10.9003	3.03745	10.9003	2.18005	10.9003	2.92395	10.9002	3.1796	10.9	2.6277	10.9002	2.44935	10.9	2.7306
10.9083	2.89945	10.9087	2.99095	10.9087	2.16155	10.9087	2.8765	10.9085	3.14595	10.9083	2.621	10.9085	2.40565	10.9083	2.68735
10.9167	2.8527	10.917	2.94295	10.917	2.1466	10.917	2.82935	10.9168	3.1118	10.9167	2.60765	10.9168	2.3604	10.9167	2.6437
10.925	2.80905	10.9253	2.89685	10.9253	2.1319	10.9253	2.7845	10.9252	3.0801	10.925	2.59305	10.9252	2.32075	10.925	2.5994
10.9333	2.7616	10.9337	2.8474	10.9337	2.10765	10.9337	2.73555	10.9335	3.045	10.9333	2.56645	10.9335	2.27285	10.9333	2.55265
10.9417	2.7155	10.942	2.79975	10.942	2.0867	10.942	2.6897	10.9418	3.01285	10.9417	2.5355	10.9418	2.2273	10.9417	2.50825
10.95	2.66755	10.9503	2.7486	10.9503	2.0566	10.9503	2.63745	10.9502	2.97875	10.95	2.4977	10.9502	2.17955	10.95	2.4617
10.9583	2.62005	10.9587	2.6978	10.9587	2.0243	10.9587	2.58785	10.9585	2.94585	10.9583	2.454	10.9585	2.133	10.9583	2.4122
10.9667	2.5737	10.967	2.64845	10.967	1.98765	10.967	2.5395	10.9668	2.91125	10.9667	2.4054	10.9668	2.08735	10.9667	2.3668
10.975	2.52625	10.9753	2.5999	10.9753	1.94785	10.9753	2.4915	10.9752	2.87765	10.975	2.3519	10.9752	2.0409	10.975	2.3196
10.9833	2.47875	10.9837	2.54745	10.9837	1.90105	10.9837	2.44035	10.9835	2.84305	10.9833	2.28875	10.9835	1.99255	10.9833	2.27065
10.9917	2.4293	10.992	2.4981	10.992	1.85195	10.992	2.38895	10.9918	2.8091	10.9917	2.22245	10.9918	1.945	10.9917	2.2217
11	2.38	11.0003	2.44585	11.0003	1.7988	11.0003	2.3378	11.0002	2.77515	11	2.153	11.0002	1.89835	11	2.17075
11.0083	2.3308	11.0087	2.39455	11.0087	1.74185	11.0087	2.28705	11.0085	2.73995	11.0083	2.0805	11.0085	1.8477	11.0083	2.1241
11.0167	2.282	11.017	2.34425	11.017	1.68515	11.017	2.2366	11.0168	2.7053	11.0167	2.0074	11.0168	1.80325	11.0167	2.07545
11.025	2.23115	11.0253	2.2931	11.0253	1.62365	11.0253	2.186	11.0252	2.67235	11.025	1.93225	11.0252	1.75255	11.025	2.02675
11.0333	2.1806	11.0337	2.23905	11.0337	1.5602	11.0337	2.13245	11.0335	2.63505	11.0333	1.85815	11.0335	1.70475	11.0333	1.97615
11.0417	2.1271	11.042	2.18565	11.042	1.49485	11.042	2.0783	11.0418	2.6002	11.0417	1.78185	11.0418	1.65315	11.0417	1.92505
11.05	2.07925	11.0503	2.1364	11.0503	1.43305	11.0503	2.02945	11.0502	2.56355	11.05	1.7086	11.0502	1.60755	11.05	1.8783
11.0583	2.025	11.0587	2.08015	11.0587	1.3667	11.0587	1.9711	11.0585	2.5283	11.0583	1.63325	11.0585	1.5572	11.0583	1.82515
11.0667	1.97025	11.067	2.0292	11.067	1.29905	11.067	1.9174	11.0668	2.4922	11.0667	1.5587	11.0668	1.50595	11.0667	1.77245
11.075	1.9129	11.0753	1.9717	11.0753	1.23435	11.0753	1.8618	11.0752	2.45375	11.075	1.48205	11.0752	1.4527	11.075	1.7189
11.0833	1.85925	11.0837	1.91945	11.0837	1.1679	11.0837	1.80695	11.0835	2.4183	11.0833	1.40705	11.0835	1.40445	11.0833	1.6676
11.0917	1.80095	11.092	1.86335	11.092	1.09935	11.092	1.74865	11.0918	2.3799	11.0917	1.332	11.0918	1.35025	11.0917	1.61315
11.1	1.74565	11.1003	1.81005	11.1003	1.0381	11.1003	1.6942	11.1002	2.34205	11.1	1.2617	11.1002	1.3022	11.1	1.5623
11.1083	1.68845	11.1087	1.7553	11.1087	0.972101	11.1087	1.6392	11.1085	2.3047	11.1083	1.1876	11.1085	1.2508	11.1083	1.5079
11.1167	1.6301	11.117	1.69945	11.117	0.907001	11.117	1.58335	11.1168	2.2656	11.1167	1.11495	11.1168	1.19735	11.1167	1.45355
11.125	1.5709	11.1253	1.6427	11.1253	0.840801	11.1253	1.52515	11.1252	2.2283	11.125	1.0437	11.1252	1.14525	11.125	1.4001
11.1333	1.51275	11.1337	1.58685	11.1337	0.777651	11.1337	1.4677	11.1335	2.1881	11.1333	0.970851	11.1335	1.09355	11.1333	1.34545
11.1417	1.45215	11.142	1.53	11.142	0.714501	11.142	1.4099	11.1418	2.15115	11.1417	0.899951	11.1418	1.04115	11.1417	1.2886
11.15	1.3928	11.1503	1.47405	11.1503	0.650501	11.1503	1.35175	11.1502	2.11295	11.15	0.831151	11.1502	0.987651	11.15	1.2357
11.1583	1.33365	11.1587	1.417	11.1587	0.587301	11.1587	1.2947	11.1585	2.07365	11.1583	0.758251	11.1585	0.936001	11.1583	1.17875
11.1667	1.2731	11.167	1.3611	11.167	0.524201	11.167	1.23575	11.1668	2.0339	11.1667	0.688451	11.1668	0.882451	11.1667	1.12315
11.175	1.21185	11.1753	1.3033	11.1753	0.46325	11.1753	1.17785	11.1752	1.99355	11.175	0.620751	11.1752	0.829651	11.175	1.06695
11.1833	1.1511	11.1837	1.24305	11.1837	0.39875	11.1837	1.11735	11.1835	1.9569	11.1833	0.550101	11.1835	0.778201	11.1833	1.00965
11.1917	1.09035	11.192	1.18595	11.192	0.33835	11.192	1.05915	11.1918	1.9175	11.1917	0.480751	11.1918	0.723201	11.1917	0.950901
11.2	1.0309	11.2003	1.1302	11.2003	0.2768	11.2003	0.999501	11.2002	1.8782	11.2	0.4153	11.2002	0.670551	11.2	0.895801
11.2083	0.969001	11.2087	1.06945	11.2087	0.21725	11.2087	0.940301	11.2085	1.84135	11.2083	0.34505	11.2085	0.616951	11.2083	0.835201
11.2167	0.910751	11.217	1.01455	11.217	0.15955	11.217	0.884851	11.2168	1.8039	11.2167	0.2829	11.2168	0.567101	11.2167	0.780651
11.225	0.851801	11.2253	0.957351	11.2253	0.10025	11.2253	0.826851	11.2252	1.7677	11.225	0.2171	11.2252	0.517201	11.225	0.726751
11.2333	0.793651	11.2337	0.901251	11.2337	0.04355	11.2337	0.770851	11.2335	1.72685	11.2333	0.15455	11.2335	0.465401	11.2333	0.670651
11.2417	0.731001	11.242	0.840101	11.242	-0.018	11.242	0.711651	11.2418	1.6922	11.2417	0.0883	11.2418	0.4113	11.2417	0.612101
11.25	0.674951	11.2503	0.787801	11.2503	-0.0678	11.2503	0.656601	11.2502	1.65385	11.25	0.03035	11.2502	0.36785	11.25	0.559551
11.2583	0.617001	11.2587	0.733451	11.2587	-0.12235	11.2587	0.601201	11.2585	1.618	11.2583	-0.02815	11.2585	0.31475	11.2583	0.504551
11.2667	0.558451	11.267	0.675251	11.267	-0.17935	11.267	0.543251	11.2668	1.5831	11.2667	-0.0911	11.2668	0.2646	11.2667	0.4483
11.275	0.497251	11.2753	0.619601	11.2753	-0.234	11.2753	0.485851	11.2752	1.54725	11.275	-0.1512	11.2752	0.2157	11.275	0.39405
11.2833	0.443801	11.2837	0.565851	11.2837	-0.2853	11.2837	0.4339	11.2835	1.51135	11.2833	-0.2055	11.2835	0.17035	11.2833	0.34125
11.2917	0.38825	11.292	0.515751	11.292	-0.33475	11.292	0.38215	11.2918	1.47435	11.2917	-0.25955	11.2918	0.1243	11.2917	0.29095
11.3	0.33285	11.3003	0.462001	11.3003	-0.38565	11.3003	0.32885	11.3002	1.43975	11.3	-0.315	11.3002	0.0782	11.3	0.2376
11.3083	0.2799	11.3087	0.4102	11.3087	-0.43195	11.3087	0.2789	11.3085	1.40695	11.3083	-0.36445	11.3085	0.03405	11.3083	0.1887
11.3167	0.22625	11.317	0.35925	11.317	-0.47975	11.317	0.22675	11.3168	1.37295	11.3167	-0.4156	11.3168	-0.0105	11.3167	0.1369
11.325	0.17465	11.3253	0.3077	11.3253	-0.52635	11.3253	0.17715	11.3252	1.34035	11.325	-0.4656	11.3252	-0.05525	11.325	0.08435
11.3333	0.12625	11.3337	0.2582	11.3337	-0.5719	11.3337	0.1282	11.3335	1.30775	11.3333	-0.51225	11.3335	-0.09725	11.3333	0.03545
11.3417	0.07795	11.342	0.2124	11.342	-0.61255	11.342	0.08455	11.3418	1.27775	11.3417	-0.55535	11.3418	-0.1362	11.3417	-0.00725
11.35	0.02885	11.3503	0.1614	11.3503	-0.65495	11.3503	0.0359	11.3502	1.2485	11.35	-0.60085	11.3502	-0.18125	11.35	-0.0559
11.3583	-0.01915	11.3587	0.11615	11.3587	-0.69635	11.3587	-0.0082	11.3585	1.21725	11.3583	-0.6455	11.3585	-0.22245	11.3583	-0.1012
11.3667	-0.06795	11.367	0.0689	11.367	-0.738	11.367	-0.0532	11.3668	1.1895	11.3667	-0.6864	11.3668	-0.2635	11.3667	-0.14735
11.375	-0.112	11.3753	0.02535	11.3753	-0.7739	11.3753	-0.0948	11.3752	1.1611	11.375	-0.72485	11.3752	-0.30035	11.375	-0.18925
11.3833	-0.1578	11.3837	-0.0208	11.3837	-0.8121	11.3837	-0.13555	11.3835	1.13405	11.3833	-0.7633	11.3835	-0.3416	11.3833	-0.23625
11.3917	-0.19795	11.392	-0.0614	11.392	-0.84515	11.392	-0.175	11.3918	1.107	11.3917	-0.7965	11.3918	-0.37825	11.3917	-0.2762
11.4	-0.24075	11.4003	-0.10145	11.4003	-0.88075	11.4003	-0.21305	11.4002	1.08515	11.4	-0.8297	11.4002	-0.41615	11.4	-0.31625
11.4083	-0.2818	11.4087	-0.1456	11.4087	-0.91395	11.4087	-0.25235	11.4085	1.0619	11.4083	-0.86515	11.4085	-0.45455	11.4083	-0.36035
11.4167	-0.3194	11.417	-0.1822	11.417	-0.9439	11.417	-0.28765	11.4168	1.0369	11.4167	-0.8938	11.4168	-0.4904	11.4167	-0.39875
11.425	-0.3538	11.4253	-0.2211	11.4253	-0.9747	11.4253	-0.32075	11.4252	1.01365	11.425	-0.9213	11.4252	-0.525	11.425	-0.4339
11.4333	-0.3904	11.4337	-0.2582	11.4337	-1.00325	11.4337	-0.3542	11.4335	0.9938	11.4333	-0.94915	11.4335	-0.55975	11.4333	-0.4717
11.4417	-0.42565	11.442	-0.29595	11.442	-1.02835	11.442	-0.3886	11.4418	0.97335	11.4417	-0.9756	11.4418	-0.5912	11.4417	-0.50865
11.45	-0.46125	11.4503	-0.33075	11.4503	-1.05285	11.4503	-0.41905	11.4502	0.9535	11.45	-1.00035	11.4502	-0.6262	11.45	-0.54395
11.4583	-0.4944	11.4587	-0.36565	11.4587	-1.0804	11.4587	-0.45105	11.4585	0.93815	11.4583	-1.0255	11.4585	-0.6605	11.4583	-0.57905
11.4667	-0.52345	11.467	-0.39795	11.467	-1.10215	11.467	-0.4799	11.4668	0.9179	11.4667	-1.04505	11.4668	-0.69045	11.4667	-0.6089
11.475	-0.5543	11.4753	-0.4301	11.4753	-1.1248	11.4753	-0.50855	11.4752	0.90035	11.475	-1.06665	11.4752	-0.7205	11.475	-0.6396
11.4833	-0.58335	11.4837	-0.4603	11.4837	-1.1444	11.4837	-0.53295	11.4835	0.8842	11.4833	-1.08505	11.4835	-0.74905	11.4833	-0.67095
11.4917	-0.6124	11.492	-0.4925	11.492	-1.1648	11.492	-0.55995	11.4918	0.8685	11.4917	-1.10365	11.4918	-0.78015	11.4917	-0.7014
11.5	-0.63945	11.5003	-0.52105	11.5003	-1.18445	11.5003	-0.58335	11.5002	0.8536	11.5	-1.12045	11.5002	-0.8097	11.5	-0.72925
11.5083	-0.66465	11.5087	-0.54815	11.5087	-1.2004	11.5087	-0.60855	11.5085	0.84085	11.5083	-1.13535	11.5085	-0.83465	11.5083	-0.7551
11.5167	-0.6907	11.517	-0.57595	11.517	-1.219	11.517	-0.63085	11.5168	0.82665	11.5167	-1.15025	11.5168	-0.86285	11.5167	-0.7811
11.525	-0.7136	11.5253	-0.60265	11.5253	-1.2358	11.5253	-0.6564	11.5252	0.81465	11.525	-1.1677	11.5252	-0.8895	11.525	-0.80655
11.5333	-0.7377	11.5337	-0.63025	11.5337	-1.25145	11.5337	-0.67705	11.5335	0.80235	11.5333	-1.18165	11.5335	-0.91405	11.5333	-0.8326
11.5417	-0.7586	11.542	-0.65225	11.542	-1.2651	11.542	-0.695	11.5418	0.7914	11.5417	-1.1919	11.5418	-0.93755	11.5417	-0.8563
11.55	-0.7822	11.5503	-0.6786	11.5503	-1.2828	11.5503	-0.718	11.5502	0.77945	11.55	-1.2062	11.5502	-0.96155	11.55	-0.8796
11.5583	-0.8037	11.5587	-0.7014	11.5587	-1.29515	11.5587	-0.7364	11.5585	0.7702	11.5583	-1.21715	11.5585	-0.985	11.5583	-0.9003
11.5667	-0.82285	11.567	-0.7222	11.567	-1.30705	11.567	-0.75495	11.5668	0.7587	11.5667	-1.2277	11.5668	-1.00475	11.5667	-0.91985
11.575	-0.8377	11.5753	-0.7396	11.5753	-1.3154	11.5753	-0.771	11.5752	0.75075	11.575	-1.2337	11.5752	-1.02575	11.575	-0.9384
11.5833	-0.86015	11.5837	-0.76205	11.5837	-1.32835	11.5837	-0.79255	11.5835	0.74345	11.5833	-1.2461	11.5835	-1.04655	11.5833	-0.95895
11.5917	-0.87515	11.592	-0.78255	11.592	-1.33745	11.592	-0.80675	11.5918	0.73375	11.5917	-1.25285	11.5918	-1.0656	11.5917	-0.9758
11.6	-0.8938	11.6003	-0.80215	11.6003	-1.3513	11.6003	-0.82705	11.6002	0.72505	11.6	-1.26495	11.6002	-1.08665	11.6	-0.99575
11.6083	-0.9079	11.6087	-0.81865	11.6087	-1.358	11.6087	-0.83845	11.6085	0.7165	11.6083	-1.2717	11.6085	-1.1016	11.6083	-1.0117
11.6167	-0.92175	11.617	-0.8353	11.617	-1.36615	11.617	-0.8546	11.6168	0.71125	11.6167	-1.2786	11.6168	-1.11855	11.6167	-1.0256
11.625	-0.9372	11.6253	-0.8526	11.6253	-1.3731	11.6253	-0.8677	11.6252	0.70205	11.625	-1.28515	11.6252	-1.13315	11.625	-1.04245
11.6333	-0.9507	11.6337	-0.87095	11.6337	-1.3828	11.6337	-0.8818	11.6335	0.69505	11.6333	-1.29215	11.6335	-1.1506	11.6333	-1.0573
11.6417	-0.9632	11.642	-0.884	11.642	-1.39125	11.642	-0.89505	11.6418	0.68825	11.6417	-1.3	11.6418	-1.16565	11.6417	-1.0721
11.65	-0.9745	11.6503	-0.90045	11.6503	-1.3993	11.6503	-0.9096	11.6502	0.68295	11.65	-1.30495	11.6502	-1.1798	11.65	-1.08615
11.6583	-0.9862	11.6587	-0.91555	11.6587	-1.40695	11.6587	-0.92025	11.6585	0.6753	11.6583	-1.30935	11.6585	-1.19295	11.6583	-1.0996
11.6667	-0.9975	11.667	-0.931	11.667	-1.41475	11.667	-0.93565	11.6668	0.6705	11.6667	-1.3169	11.6668	-1.20515	11.6667	-1.11275
11.675	-1.00775	11.6753	-0.94395	11.6753	-1.42055	11.6753	-0.9468	11.6752	0.66505	11.675	-1.3239	11.6752	-1.21745	11.675	-1.12555
11.6833	-1.0184	11.6837	-0.95945	11.6837	-1.42855	11.6837	-0.9615	11.6835	0.65855	11.6833	-1.3309	11.6835	-1.23145	11.6833	-1.1388
11.6917	-1.0281	11.692	-0.968	11.692	-1.43155	11.692	-0.97095	11.6918	0.6538	11.6917	-1.33435	11.6918	-1.2408	11.6917	-1.14765
11.7	-1.0379	11.7003	-0.98345	11.7003	-1.43875	11.7003	-0.98325	11.7002	0.64885	11.7	-1.3407	11.7002	-1.254	11.7	-1.16105
11.7083	-1.04555	11.7087	-0.9946	11.7087	-1.4437	11.7087	-0.9923	11.7085	0.64395	11.7083	-1.34425	11.7085	-1.26305	11.7083	-1.1716
11.7167	-1.05485	11.717	-1.00495	11.717	-1.449	11.717	-1.00305	11.7168	0.63895	11.7167	-1.34935	11.7168	-1.2727	11.7167	-1.18375
11.725	-1.0605	11.7253	-1.0163	11.7253	-1.4542	11.7253	-1.0139	11.7252	0.63515	11.725	-1.3535	11.7252	-1.28245	11.725	-1.19405
11.7333	-1.0703	11.7337	-1.0278	11.7337	-1.45955	11.7337	-1.02225	11.7335	0.62995	11.7333	-1.3614	11.7335	-1.29155	11.7333	-1.2027
11.7417	-1.078	11.742	-1.0364	11.742	-1.4652	11.742	-1.0314	11.7418	0.62535	11.7417	-1.3661	11.7418	-1.30075	11.7417	-1.2134
11.75	-1.08645	11.7503	-1.0482	11.7503	-1.47225	11.7503	-1.03985	11.7502	0.62	11.75	-1.3724	11.7502	-1.3102	11.75	-1.223
11.7583	-1.09335	11.7587	-1.0568	11.7587	-1.4779	11.7587	-1.0509	11.7585	0.6134	11.7583	-1.3773	11.7585	-1.3192	11.7583	-1.23145
11.7667	-1.1007	11.767	-1.0666	11.767	-1.48275	11.767	-1.0594	11.7668	0.611	11.7667	-1.38155	11.7668	-1.32815	11.7667	-1.2411
11.775	-1.10645	11.7753	-1.076	11.7753	-1.4876	11.7753	-1.0674	11.7752	0.6089	11.775	-1.38565	11.7752	-1.33435	11.775	-1.2497
11.7833	-1.1134	11.7837	-1.08665	11.7837	-1.49295	11.7837	-1.0762	11.7835	0.60335	11.7833	-1.3916	11.7835	-1.34235	11.7833	-1.25815
11.7917	-1.11895	11.792	-1.0951	11.792	-1.49745	11.792	-1.0848	11.7918	0.5993	11.7917	-1.39675	11.7918	-1.3514	11.7917	-1.26545
11.8	-1.12505	11.8003	-1.10155	11.8003	-1.50165	11.8003	-1.09095	11.8002	0.59645	11.8	-1.4011	11.8002	-1.35915	11.8	-1.2749
11.8083	-1.12955	11.8087	-1.1099	11.8087	-1.50645	11.8087	-1.09775	11.8085	0.59445	11.8083	-1.4044	11.8085	-1.3659	11.8083	-1.2821
11.8167	-1.13525	11.817	-1.11745	11.817	-1.5107	11.817	-1.10625	11.8168	0.5885	11.8167	-1.40755	11.8168	-1.37015	11.8167	-1.28975
11.825	-1.13985	11.8253	-1.1258	11.8253	-1.51515	11.8253	-1.1125	11.8252	0.5854	11.825	-1.41405	11.8252	-1.3788	11.825	-1.29825
11.8333	-1.146	11.8337	-1.1343	11.8337	-1.5211	11.8337	-1.1216	11.8335	0.5832	11.8333	-1.42	11.8335	-1.3862	11.8333	-1.3042
11.8417	-1.14765	11.842	-1.14	11.842	-1.52235	11.842	-1.1258	11.8418	0.57855	11.8417	-1.42215	11.8418	-1.38935	11.8417	-1.3102
11.85	-1.1538	11.8503	-1.14875	11.8503	-1.5258	11.8503	-1.13305	11.8502	0.57605	11.85	-1.4269	11.8502	-1.39355	11.85	-1.31645
11.8583	-1.15865	11.8587	-1.1578	11.8587	-1.53265	11.8587	-1.1397	11.8585	0.57275	11.8583	-1.43005	11.8585	-1.4033	11.8583	-1.3235
11.8667	-1.1631	11.867	-1.16065	11.867	-1.5353	11.867	-1.14545	11.8668	0.5697	11.8667	-1.43325	11.8668	-1.40745	11.8667	-1.32845
11.875	-1.16845	11.8753	-1.1684	11.8753	-1.53855	11.8753	-1.1494	11.8752	0.5665	11.875	-1.43685	11.8752	-1.41295	11.875	-1.33525
11.8833	-1.17295	11.8837	-1.1764	11.8837	-1.54345	11.8837	-1.15865	11.8835	0.5642	11.8833	-1.4451	11.8835	-1.4181	11.8833	-1.34295
11.8917	-1.1766	11.892	-1.1785	11.892	-1.54395	11.892	-1.16175	11.8918	0.56155	11.8917	-1.44605	11.8918	-1.4226	11.8917	-1.34675
11.9	-1.1809	11.9003	-1.1861	11.9003	-1.549	11.9003	-1.168	11.9002	0.55715	11.9	-1.451	11.9002	-1.42815	11.9	-1.35245
11.9083	-1.183	11.9087	-1.19255	11.9087	-1.5509	11.9087	-1.17385	11.9085	0.5538	11.9083	-1.45335	11.9085	-1.43095	11.9083	-1.35695
11.9167	-1.1866	11.917	-1.19825	11.917	-1.5561	11.917	-1.18055	11.9168	0.55075	11.9167	-1.45855	11.9168	-1.43715	11.9167	-1.36425
11.925	-1.1884	11.9253	-1.20345	11.9253	-1.55905	11.9253	-1.18775	11.9252	0.5491	11.925	-1.46215	11.9252	-1.441	11.925	-1.3689
11.9333	-1.1931	11.9337	-1.2094	11.9337	-1.56165	11.9337	-1.19185	11.9335	0.5469	11.9333	-1.4657	11.9335	-1.4455	11.9333	-1.37465
11.9417	-1.1959	11.942	-1.2133	11.942	-1.5631	11.942	-1.1966	11.9418	0.5447	11.9417	-1.4691	11.9418	-1.44845	11.9417	-1.3776
11.95	-1.1971	11.9503	-1.2169	11.9503	-1.56495	11.9503	-1.1996	11.9502	0.54225	11.95	-1.47015	11.9502	-1.45085	11.95	-1.38045
11.9583	-1.2014	11.9587	-1.219	11.9587	-1.56775	11.9587	-1.2057	11.9585	0.53835	11.9583	-1.4753	11.9585	-1.45425	11.9583	-1.3856
11.9667	-1.20425	11.967	-1.22475	11.967	-1.57115	11.967	-1.2073	11.9668	0.53745	11.9667	-1.4775	11.9668	-1.4588	11.9667	-1.38925
11.975	-1.2053	11.9753	-1.22895	11.9753	-1.5728	11.9753	-1.21225	11.9752	0.53635	11.975	-1.48095	11.9752	-1.46115	11.975	-1.39465
11.9833	-1.20875	11.9837	-1.23335	11.9837	-1.57565	11.9837	-1.2155	11.9835	0.53195	11.9833	-1.4818	11.9835	-1.46375	11.9833	-1.39815
11.9917	-1.21355	11.992	-1.236	11.992	-1.5793	11.992	-1.2186	11.9918	0.53115	11.9917	-1.48545	11.9918	-1.46965	11.9917	-1.40285
12	-1.2154	12.0003	-1.24315	12.0003	-1.5808	12.0003	-1.2237	12.0002	0.5274	12	-1.48785	12.0002	-1.47065	12	-1.4069
12.0083	-1.21775	12.0087	-1.24535	12.0087	-1.58215	12.0087	-1.2263	12.0085	0.52655	12.0083	-1.4887	12.0085	-1.4736	12.0083	-1.40845
12.0167	-1.2222	12.017	-1.2524	12.017	-1.58815	12.017	-1.2327	12.0168	0.52595	12.0167	-1.4949	12.0168	-1.47855	12.0167	-1.4148
12.025	-1.2268	12.0253	-1.2579	12.0253	-1.591	12.0253	-1.2385	12.0252	0.52435	12.025	-1.4981	12.0252	-1.48245	12.025	-1.41855
12.0333	-1.22825	12.0337	-1.2577	12.0337	-1.5928	12.0337	-1.24035	12.0335	0.5219	12.0333	-1.5004	12.0335	-1.48555	12.0333	-1.4212
12.0417	-1.23055	12.042	-1.26065	12.042	-1.59215	12.042	-1.2414	12.0418	0.5187	12.0417	-1.5029	12.0418	-1.4889	12.0417	-1.4242
12.05	-1.2325	12.0503	-1.26405	12.0503	-1.5953	12.0503	-1.2472	12.0502	0.51795	12.05	-1.50665	12.0502	-1.4907	12.05	-1.4308
12.0583	-1.2367	12.0587	-1.2672	12.0587	-1.59965	12.0587	-1.25	12.0585	0.5154	12.0583	-1.51045	12.0585	-1.4938	12.0583	-1.4316
12.0667	-1.23795	12.067	-1.271	12.067	-1.5994	12.067	-1.25315	12.0668	0.5127	12.0667	-1.5095	12.0668	-1.4951	12.0667	-1.4347
12.075	-1.2403	12.0753	-1.27305	12.0753	-1.60295	12.0753	-1.2572	12.0752	0.51155	12.075	-1.51285	12.0752	-1.4978	12.075	-1.43695
12.0833	-1.23875	12.0837	-1.2737	12.0837	-1.6032	12.0837	-1.2582	12.0835	0.51055	12.0833	-1.5142	12.0835	-1.4998	12.0833	-1.4385
12.0917	-1.24305	12.092	-1.27875	12.092	-1.6065	12.092	-1.26195	12.0918	0.5109	12.0917	-1.51625	12.0918	-1.50265	12.0917	-1.4438
12.1	-1.24355	12.1003	-1.2813	12.1003	-1.6069	12.1003	-1.2634	12.1002	0.50855	12.1	-1.5152	12.1002	-1.50295	12.1	-1.4443
12.1083	-1.24625	12.1087	-1.28465	12.1087	-1.60945	12.1087	-1.2678	12.1085	0.50735	12.1083	-1.52015	12.1085	-1.5069	12.1083	-1.44985
12.1167	-1.24945	12.117	-1.28805	12.117	-1.61185	12.117	-1.27155	12.1168	0.50425	12.1167	-1.52165	12.1168	-1.50995	12.1167	-1.45285
12.125	-1.25095	12.1253	-1.29005	12.1253	-1.61355	12.1253	-1.2746	12.1252	0.505	12.125	-1.52405	12.1252	-1.51225	12.125	-1.45555
12.1333	-1.2518	12.1337	-1.2936	12.1337	-1.61445	12.1337	-1.2762	12.1335	0.5016	12.1333	-1.5242	12.1335	-1.51485	12.1333	-1.4572
12.1417	-1.254	12.142	-1.2972	12.142	-1.6155	12.142	-1.2791	12.1418	0.50095	12.1417	-1.52625	12.1418	-1.5177	12.1417	-1.4592
12.15	-1.2559	12.1503	-1.29905	12.1503	-1.61785	12.1503	-1.2791	12.1502	0.501	12.15	-1.52875	12.1502	-1.51905	12.15	-1.4608
12.1583	-1.25685	12.1587	-1.3003	12.1587	-1.6206	12.1587	-1.2833	12.1585	0.4994	12.1583	-1.53155	12.1585	-1.5204	12.1583	-1.46305
12.1667	-1.26015	12.167	-1.30305	12.167	-1.62275	12.167	-1.28605	12.1668	0.49845	12.1667	-1.5329	12.1668	-1.52375	12.1667	-1.46705
12.175	-1.26345	12.1753	-1.30695	12.1753	-1.62615	12.1753	-1.2883	12.1752	0.49905	12.175	-1.53505	12.1752	-1.52645	12.175	-1.4693
12.1833	-1.2644	12.1837	-1.30895	12.1837	-1.62865	12.1837	-1.29145	12.1835	0.49715	12.1833	-1.5377	12.1835	-1.53	12.1833	-1.47295
12.1917	-1.2662	12.192	-1.31345	12.192	-1.6274	12.192	-1.29535	12.1918	0.4964	12.1917	-1.53865	12.1918	-1.5288	12.1917	-1.4732
12.2	-1.26775	12.2003	-1.3149	12.2003	-1.6308	12.2003	-1.29835	12.2002	0.4973	12.2	-1.53845	12.2002	-1.5331	12.2	-1.4767
12.2083	-1.2693	12.2087	-1.3159	12.2087	-1.6315	12.2087	-1.2999	12.2085	0.4956	12.2083	-1.5398	12.2085	-1.53455	12.2083	-1.4778
12.2167	-1.27115	12.217	-1.31885	12.217	-1.6335	12.217	-1.30165	12.2168	0.49585	12.2167	-1.54115	12.2168	-1.53685	12.2167	-1.47985
12.225	-1.273	12.2253	-1.32255	12.2253	-1.6353	12.2253	-1.3045	12.2252	0.49245	12.225	-1.5447	12.2252	-1.5401	12.225	-1.4821
12.2333	-1.2747	12.2337	-1.3256	12.2337	-1.63695	12.2337	-1.3094	12.2335	0.49205	12.2333	-1.54745	12.2335	-1.5419	12.2333	-1.4838
12.2417	-1.2756	12.242	-1.32745	12.242	-1.638	12.242	-1.3111	12.2418	0.49275	12.2417	-1.5483	12.2418	-1.5438	12.2417	-1.4871
12.25	-1.276	12.2503	-1.32835	12.2503	-1.6382	12.2503	-1.3119	12.2502	0.4919	12.25	-1.54855	12.2502	-1.54315	12.25	-1.487
12.2583	-1.2768	12.2587	-1.3287	12.2587	-1.63905	12.2587	-1.31445	12.2585	0.48925	12.2583	-1.55055	12.2585	-1.5449	12.2583	-1.48935
12.2667	-1.2803	12.267	-1.3318	12.267	-1.64195	12.267	-1.318	12.2668	0.4878	12.2667	-1.55225	12.2668	-1.54725	12.2667	-1.49175
12.275	-1.28145	12.2753	-1.3324	12.2753	-1.64265	12.2753	-1.3183	12.2752	0.4865	12.275	-1.55435	12.2752	-1.5483	12.275	-1.4925
12.2833	-1.2836	12.2837	-1.3346	12.2837	-1.6438	12.2837	-1.32055	12.2835	0.48575	12.2833	-1.5551	12.2835	-1.5494	12.2833	-1.4934
12.2917	-1.28315	12.292	-1.3338	12.292	-1.64415	12.292	-1.31995	12.2918	0.4854	12.2917	-1.55525	12.2918	-1.54955	12.2917	-1.49465
12.3	-1.28475	12.3003	-1.3384	12.3003	-1.6476	12.3003	-1.3229	12.3002	0.4843	12.3	-1.5581	12.3002	-1.55185	12.3	-1.4965
12.3083	-1.286	12.3087	-1.33755	12.3087	-1.64475	12.3087	-1.32095	12.3085	0.48495	12.3083	-1.55815	12.3085	-1.55215	12.3083	-1.49685
12.3167	-1.28555	12.317	-1.3381	12.317	-1.6449	12.317	-1.3217	12.3168	0.48365	12.3167	-1.5569	12.3168	-1.55285	12.3167	-1.49865
12.325	-1.28435	12.3253	-1.3385	12.3253	-1.6439	12.3253	-1.32075	12.3252	0.4847	12.325	-1.5559	12.3252	-1.55235	12.325	-1.49705
12.3333	-1.286	12.3337	-1.33895	12.3337	-1.6437	12.3337	-1.3217	12.3335	0.48275	12.3333	-1.55595	12.3335	-1.55295	12.3333	-1.49715
12.3417	-1.28695	12.342	-1.3386	12.342	-1.64305	12.342	-1.31805	12.3418	0.48305	12.3417	-1.5548	12.3418	-1.5507	12.3417	-1.49745
12.35	-1.2895	12.3503	-1.34295	12.3503	-1.64435	12.3503	-1.32035	12.3502	0.4834	12.35	-1.5562	12.3502	-1.5528	12.35	-1.5014
12.3583	-1.28825	12.3587	-1.339	12.3587	-1.64185	12.3587	-1.31535	12.3585	0.4816	12.3583	-1.55305	12.3585	-1.5486	12.3583	-1.4965
12.3667	-1.29175	12.367	-1.34295	12.367	-1.641	12.367	-1.31705	12.3668	0.48315	12.3667	-1.55595	12.3668	-1.5501	12.3667	-1.49825
12.375	-1.29005	12.3753	-1.34145	12.3753	-1.64045	12.3753	-1.31305	12.3752	0.4841	12.375	-1.5516	12.3752	-1.54815	12.375	-1.49635
12.3833	-1.292	12.3837	-1.34135	12.3837	-1.64075	12.3837	-1.3134	12.3835	0.4868	12.3833	-1.5502	12.3835	-1.5483	12.3833	-1.49665
12.3917	-1.2922	12.392	-1.341	12.392	-1.64035	12.392	-1.30975	12.3918	0.4876	12.3917	-1.55155	12.3918	-1.54705	12.3917	-1.49435
12.4	-1.2942	12.4003	-1.344	12.4003	-1.64105	12.4003	-1.312	12.4002	0.4895	12.4	-1.5515	12.4002	-1.5463	12.4	-1.49675
12.4083	-1.2951	12.4087	-1.34165	12.4087	-1.63965	12.4087	-1.30805	12.4085	0.4948	12.4083	-1.5523	12.4085	-1.5448	12.4083	-1.4944
12.4167	-1.29485	12.417	-1.34295	12.417	-1.63705	12.417	-1.3054	12.4168	0.4973	12.4167	-1.5495	12.4168	-1.5427	12.4167	-1.49095
12.425	-1.29445	12.4253	-1.3398	12.4253	-1.637	12.4253	-1.30285	12.4252	0.50265	12.425	-1.54655	12.4252	-1.54025	12.425	-1.4894
12.4333	-1.29315	12.4337	-1.33725	12.4337	-1.6327	12.4337	-1.29785	12.4335	0.50655	12.4333	-1.54235	12.4335	-1.53665	12.4333	-1.4878
12.4417	-1.2943	12.442	-1.3376	12.442	-1.6317	12.442	-1.2958	12.4418	0.51265	12.4417	-1.5429	12.4418	-1.53615	12.4417	-1.48615
12.45	-1.29695	12.4503	-1.33545	12.4503	-1.6316	12.4503	-1.29595	12.4502	0.5211	12.45	-1.54195	12.4502	-1.5342	12.45	-1.4855
12.4583	-1.29835	12.4587	-1.33445	12.4587	-1.6308	12.4587	-1.2952	12.4585	0.52825	12.4583	-1.5409	12.4585	-1.5331	12.4583	-1.4846
12.4667	-1.2987	12.467	-1.33425	12.467	-1.6293	12.467	-1.29195	12.4668	0.53665	12.4667	-1.54135	12.4668	-1.5317	12.4667	-1.48425
12.475	-1.29875	12.4753	-1.3351	12.4753	-1.6304	12.4753	-1.29385	12.4752	0.5446	12.475	-1.5419	12.4752	-1.5309	12.475	-1.4828
12.4833	-1.2997	12.4837	-1.33605	12.4837	-1.6306	12.4837	-1.294	12.4835	0.55345	12.4833	-1.54175	12.4835	-1.53155	12.4833	-1.4823
12.4917	-1.29965	12.492	-1.33525	12.492	-1.62865	12.492	-1.29245	12.4918	0.5623	12.4917	-1.54185	12.4918	-1.5314	12.4917	-1.4819
12.5	-1.30255	12.5003	-1.3361	12.5003	-1.63025	12.5003	-1.29385	12.5002	0.56625	12.5	-1.5414	12.5002	-1.5314	12.5	-1.4825
12.5083	-1.3014	12.5087	-1.3346	12.5087	-1.6296	12.5087	-1.29255	12.5085	0.571	12.5083	-1.54295	12.5085	-1.5315	12.5083	-1.48145
12.5167	-1.302	12.517	-1.3357	12.517	-1.62905	12.517	-1.2949	12.5168	0.578	12.5167	-1.541	12.5168	-1.53125	12.5167	-1.4822
12.525	-1.304	12.5253	-1.33715	12.5253	-1.63285	12.5253	-1.29805	12.5252	0.5843	12.525	-1.54435	12.5252	-1.53405	12.525	-1.4842
12.5333	-1.30255	12.5337	-1.33645	12.5337	-1.6338	12.5337	-1.29875	12.5335	0.5866	12.5333	-1.5431	12.5335	-1.53255	12.5333	-1.48165
12.5417	-1.30545	12.542	-1.33735	12.542	-1.6332	12.542	-1.30035	12.5418	0.5896	12.5417	-1.5436	12.5418	-1.5339	12.5417	-1.4832
12.55	-1.305	12.5503	-1.333	12.5503	-1.63245	12.5503	-1.29955	12.5502	0.5902	12.55	-1.5437	12.5502	-1.53315	12.55	-1.48075
12.5583	-1.3078	12.5587	-1.33705	12.5587	-1.6335	12.5587	-1.3034	12.5585	0.5912	12.5583	-1.5455	12.5585	-1.53645	12.5583	-1.48315
12.5667	-1.3071	12.567	-1.3358	12.567	-1.6341	12.567	-1.303	12.5668	0.591	12.5667	-1.54725	12.5668	-1.5356	12.5667	-1.48345
12.575	-1.30765	12.5753	-1.3376	12.5753	-1.63445	12.5753	-1.30435	12.5752	0.5899	12.575	-1.5485	12.5752	-1.53955	12.575	-1.48505
12.5833	-1.30755	12.5837	-1.33645	12.5837	-1.6339	12.5837	-1.30585	12.5835	0.5864	12.5833	-1.5488	12.5835	-1.53925	12.5833	-1.4847
12.5917	-1.3076	12.592	-1.3395	12.592	-1.6353	12.592	-1.30795	12.5918	0.5841	12.5917	-1.5498	12.5918	-1.54065	12.5917	-1.48645
12.6	-1.3096	12.6003	-1.34075	12.6003	-1.63855	12.6003	-1.3098	12.6002	0.57985	12.6	-1.55145	12.6002	-1.5417	12.6	-1.4878
12.6083	-1.3117	12.6087	-1.34375	12.6087	-1.64105	12.6087	-1.3137	12.6085	0.5743	12.6083	-1.55295	12.6085	-1.54275	12.6083	-1.4911
12.6167	-1.31175	12.617	-1.3431	12.617	-1.6393	12.617	-1.31265	12.6168	0.57005	12.6167	-1.55355	12.6168	-1.5431	12.6167	-1.48955
12.625	-1.3125	12.6253	-1.34485	12.6253	-1.64255	12.6253	-1.31655	12.6252	0.56365	12.625	-1.55565	12.6252	-1.5465	12.625	-1.48975
12.6333	-1.3133	12.6337	-1.3441	12.6337	-1.642	12.6337	-1.31625	12.6335	0.55775	12.6333	-1.55575	12.6335	-1.5448	12.6333	-1.49205
12.6417	-1.3137	12.642	-1.3454	12.642	-1.64305	12.642	-1.319	12.6418	0.55205	12.6417	-1.55735	12.6418	-1.54755	12.6417	-1.4915
12.65	-1.3168	12.6503	-1.34655	12.6503	-1.6433	12.6503	-1.3209	12.6502	0.54745	12.65	-1.5575	12.6502	-1.5488	12.65	-1.4926
12.6583	-1.3159	12.6587	-1.34815	12.6587	-1.64675	12.6587	-1.32125	12.6585	0.54285	12.6583	-1.5598	12.6585	-1.549	12.6583	-1.49565
12.6667	-1.3188	12.667	-1.35185	12.667	-1.6492	12.667	-1.3247	12.6668	0.5368	12.6667	-1.5617	12.6668	-1.54925	12.6667	-1.4965
12.675	-1.3163	12.6753	-1.349	12.6753	-1.64655	12.6753	-1.3237	12.6752	0.53	12.675	-1.5594	12.6752	-1.54735	12.675	-1.4956
12.6833	-1.31995	12.6837	-1.35205	12.6837	-1.64935	12.6837	-1.32365	12.6835	0.525	12.6833	-1.56085	12.6835	-1.54845	12.6833	-1.49725
12.6917	-1.3194	12.692	-1.3517	12.692	-1.6475	12.692	-1.32415	12.6918	0.5201	12.6917	-1.5624	12.6918	-1.5473	12.6917	-1.4957
12.7	-1.3174	12.7003	-1.3508	12.7003	-1.6483	12.7003	-1.3222	12.7002	0.5148	12.7	-1.56165	12.7002	-1.54585	12.7	-1.49345
12.7083	-1.31785	12.7087	-1.3484	12.7087	-1.6481	12.7087	-1.31895	12.7085	0.5112	12.7083	-1.56225	12.7085	-1.54435	12.7083	-1.49105
12.7167	-1.3167	12.717	-1.34795	12.717	-1.64965	12.717	-1.3181	12.7168	0.50765	12.7167	-1.5631	12.7168	-1.5406	12.7167	-1.48975
12.725	-1.32145	12.7253	-1.35095	12.7253	-1.65225	12.7253	-1.3197	12.7252	0.5054	12.725	-1.5677	12.7252	-1.54305	12.725	-1.4942
12.7333	-1.32085	12.7337	-1.346	12.7337	-1.6504	12.7337	-1.3137	12.7335	0.4986	12.7333	-1.56445	12.7335	-1.5389	12.7333	-1.48765
12.7417	-1.32105	12.742	-1.34705	12.742	-1.65225	12.742	-1.3119	12.7418	0.4953	12.7417	-1.5648	12.7418	-1.5351	12.7417	-1.48685
12.75	-1.31855	12.7503	-1.34185	12.7503	-1.65085	12.7503	-1.3064	12.7502	0.49155	12.75	-1.5655	12.7502	-1.5297	12.75	-1.48165
12.7583	-1.3219	12.7587	-1.33995	12.7587	-1.65315	12.7587	-1.3035	12.7585	0.48935	12.7583	-1.56485	12.7585	-1.5267	12.7583	-1.48125
12.7667	-1.3214	12.767	-1.33495	12.767	-1.65295	12.767	-1.2987	12.7668	0.4875	12.7667	-1.56695	12.7668	-1.5193	12.7667	-1.4755
12.775	-1.3186	12.7753	-1.32725	12.7753	-1.65135	12.7753	-1.28955	12.7752	0.4866	12.775	-1.5645	12.7752	-1.5131	12.775	-1.4676
12.7833	-1.31875	12.7837	-1.3224	12.7837	-1.65305	12.7837	-1.28295	12.7835	0.4848	12.7833	-1.5663	12.7835	-1.5063	12.7833	-1.4634
12.7917	-1.31645	12.792	-1.31185	12.792	-1.65005	12.792	-1.2717	12.7918	0.482	12.7917	-1.56365	12.7918	-1.496	12.7917	-1.45245
12.8	-1.31905	12.8003	-1.30795	12.8003	-1.65475	12.8003	-1.2667	12.8002	0.4799	12.8	-1.56865	12.8002	-1.49285	12.8	-1.4508
12.8083	-1.3063	12.8087	-1.29005	12.8087	-1.64115	12.8087	-1.24765	12.8085	0.4793	12.8083	-1.5572	12.8085	-1.4699	12.8083	-1.4295
12.8167	-1.29925	12.817	-1.2743	12.817	-1.63605	12.817	-1.2309	12.8168	0.4776	12.8167	-1.55295	12.8168	-1.4606	12.8167	-1.4166
12.825	-1.4111	12.8253	-1.37955	12.8253	-1.75025	12.8253	-1.3365	12.8252	0.4766	12.825	-1.66765	12.8252	-1.56345	12.825	-1.52185
12.8333	-1.35875	12.8337	-1.31765	12.8337	-1.69715	12.8337	-1.274	12.8335	0.47835	12.8333	-1.6167	12.8335	-1.50245	12.8333	-1.462
12.8417	-1.28395	12.842	-1.2345	12.842	-1.62395	12.842	-1.1887	12.8418	0.47975	12.8417	-1.54095	12.8418	-1.42035	12.8417	-1.37915
12.85	-1.2875	12.8503	-1.22905	12.8503	-1.62685	12.8503	-1.18585	12.8502	0.47975	12.85	-1.54965	12.8502	-1.41735	12.85	-1.3741
12.8583	-1.28165	12.8587	-1.21715	12.8587	-1.62335	12.8587	-1.1736	12.8585	0.48265	12.8583	-1.54785	12.8585	-1.40355	12.8583	-1.36275
12.8667	-1.2769	12.867	-1.20335	12.867	-1.619	12.867	-1.1603	12.8668	0.48515	12.8667	-1.5441	12.8668	-1.3925	12.8667	-1.35185
12.875	-1.2661	12.8753	-1.1872	12.8753	-1.61005	12.8753	-1.1454	12.8752	0.4897	12.875	-1.5363	12.8752	-1.3791	12.875	-1.33645
12.8833	-1.2606	12.8837	-1.17375	12.8837	-1.60395	12.8837	-1.1318	12.8835	0.4931	12.8833	-1.5315	12.8835	-1.3675	12.8833	-1.324
12.8917	-1.249	12.892	-1.16015	12.892	-1.59335	12.892	-1.11685	12.8918	0.49875	12.8917	-1.52615	12.8918	-1.35425	12.8917	-1.30995
12.9	-1.23735	12.9003	-1.1437	12.9003	-1.58225	12.9003	-1.1004	12.9002	0.50615	12.9	-1.51375	12.9002	-1.3395	12.9	-1.29535
12.9083	-1.22705	12.9087	-1.13135	12.9087	-1.57215	12.9087	-1.08905	12.9085	0.51395	12.9083	-1.50395	12.9085	-1.3301	12.9083	-1.2809
12.9167	-1.21235	12.917	-1.1154	12.917	-1.55895	12.917	-1.0741	12.9168	0.52015	12.9167	-1.49155	12.9168	-1.31755	12.9167	-1.26835
12.925	-1.1981	12.9253	-1.1029	12.9253	-1.54565	12.9253	-1.0621	12.9252	0.5299	12.925	-1.48045	12.9252	-1.30775	12.925	-1.258
12.9333	-1.1837	12.9337	-1.08945	12.9337	-1.53155	12.9337	-1.05075	12.9335	0.5414	12.9333	-1.4647	12.9335	-1.2969	12.9333	-1.2446
12.9417	-1.1701	12.942	-1.0759	12.942	-1.51665	12.942	-1.03935	12.9418	0.5514	12.9417	-1.45005	12.9418	-1.2855	12.9417	-1.2329
12.95	-1.15485	12.9503	-1.0644	12.9503	-1.5033	12.9503	-1.02985	12.9502	0.5618	12.95	-1.4372	12.9502	-1.27885	12.95	-1.22295
12.9583	-1.1402	12.9587	-1.05225	12.9587	-1.48755	12.9587	-1.0175	12.9585	0.57475	12.9583	-1.42075	12.9585	-1.2666	12.9583	-1.21075
12.9667	-1.12625	12.967	-1.0384	12.967	-1.47365	12.967	-1.00735	12.9668	0.5854	12.9667	-1.4032	12.9668	-1.2594	12.9667	-1.20075
12.975	-1.11505	12.9753	-1.03455	12.9753	-1.4632	12.9753	-1.00355	12.9752	0.59895	12.975	-1.39035	12.9752	-1.2555	12.975	-1.1964
12.9833	-1.10135	12.9837	-1.0259	12.9837	-1.4497	12.9837	-0.995	12.9835	0.6132	12.9833	-1.3765	12.9835	-1.24875	12.9833	-1.1885
12.9917	-1.08895	12.992	-1.0169	12.992	-1.43645	12.992	-0.98815	12.9918	0.62485	12.9917	-1.36015	12.9918	-1.2415	12.9917	-1.18055
13	-1.07695	13.0003	-1.0093	13.0003	-1.42645	13.0003	-0.98265	13.0002	0.63885	13	-1.34535	13.0002	-1.2379	13	-1.17395
13.0083	-1.06355	13.0087	-1.00145	13.0087	-1.4129	13.0087	-0.9787	13.0085	0.6513	13.0083	-1.3307	13.0085	-1.2333	13.0083	-1.16735
13.0167	-1.05535	13.017	-0.99775	13.017	-1.4066	13.017	-0.9762	13.0168	0.6639	13.0167	-1.3217	13.0168	-1.23055	13.0167	-1.16635
13.025	-1.0474	13.0253	-0.99535	13.0253	-1.40045	13.0253	-0.9769	13.0252	0.67555	13.025	-1.31405	13.0252	-1.2317	13.025	-1.1637
13.0333	-1.04315	13.0337	-0.99705	13.0337	-1.3977	13.0337	-0.982	13.0335	0.68765	13.0333	-1.30865	13.0335	-1.2316	13.0333	-1.16295
13.0417	-1.03555	13.042	-0.99555	13.042	-1.39365	13.042	-0.98355	13.0418	0.6985	13.0417	-1.3015	13.0418	-1.2319	13.0417	-1.16135
13.05	-1.0309	13.0503	-0.99425	13.0503	-1.3919	13.0503	-0.98875	13.0502	0.71055	13.05	-1.2977	13.0502	-1.23575	13.05	-1.16085
13.0583	-1.0287	13.0587	-0.9972	13.0587	-1.3927	13.0587	-0.99475	13.0585	0.71915	13.0583	-1.2965	13.0585	-1.238	13.0583	-1.16475
13.0667	-1.03015	13.067	-1.00395	13.067	-1.3964	13.067	-1.00625	13.0668	0.727	13.0667	-1.3014	13.0668	-1.2458	13.0667	-1.1708
13.075	-1.02685	13.0753	-1.00605	13.0753	-1.3993	13.0753	-1.01375	13.0752	0.7356	13.075	-1.3018	13.0752	-1.252	13.075	-1.174
13.0833	-1.03005	13.0837	-1.0152	13.0837	-1.40655	13.0837	-1.0265	13.0835	0.7442	13.0833	-1.30985	13.0835	-1.26095	13.0833	-1.1832
13.0917	-1.03575	13.092	-1.02415	13.092	-1.41505	13.092	-1.0414	13.0918	0.75275	13.0917	-1.3185	13.0918	-1.27075	13.0917	-1.191
13.1	-1.04335	13.1003	-1.03955	13.1003	-1.42785	13.1003	-1.0585	13.1002	0.7563	13.1	-1.33	13.1002	-1.285	13.1	-1.2045
13.1083	-1.0484	13.1087	-1.0512	13.1087	-1.4385	13.1087	-1.07345	13.1085	0.76155	13.1083	-1.34085	13.1085	-1.29835	13.1083	-1.2138
13.1167	-1.06005	13.117	-1.0625	13.117	-1.4527	13.117	-1.09275	13.1168	0.7673	13.1167	-1.35515	13.1168	-1.3107	13.1167	-1.2284
13.125	-1.0729	13.1253	-1.0783	13.1253	-1.46975	13.1253	-1.1116	13.1252	0.76925	13.125	-1.37005	13.1252	-1.3277	13.125	-1.24265
13.1333	-1.08405	13.1337	-1.09385	13.1337	-1.48215	13.1337	-1.1306	13.1335	0.77095	13.1333	-1.38185	13.1335	-1.34425	13.1333	-1.25725
13.1417	-1.09865	13.142	-1.1104	13.142	-1.49715	13.142	-1.15045	13.1418	0.7729	13.1417	-1.39605	13.1418	-1.3606	13.1417	-1.2741
13.15	-1.11105	13.1503	-1.1275	13.1503	-1.51205	13.1503	-1.1686	13.1502	0.7749	13.15	-1.41165	13.1502	-1.375	13.15	-1.28755
13.1583	-1.12285	13.1587	-1.1452	13.1587	-1.525	13.1587	-1.1859	13.1585	0.7748	13.1583	-1.42495	13.1585	-1.39105	13.1583	-1.3041
13.1667	-1.1393	13.167	-1.16485	13.167	-1.54095	13.167	-1.20385	13.1668	0.7737	13.1667	-1.4409	13.1668	-1.40915	13.1667	-1.3216
13.175	-1.15285	13.1753	-1.1836	13.1753	-1.55305	13.1753	-1.22195	13.1752	0.77175	13.175	-1.4548	13.1752	-1.4258	13.175	-1.33905
13.1833	-1.1666	13.1837	-1.198	13.1837	-1.5655	13.1837	-1.2364	13.1835	0.76715	13.1833	-1.4662	13.1835	-1.43875	13.1833	-1.3523
13.1917	-1.1853	13.192	-1.21785	13.192	-1.58195	13.192	-1.25355	13.1918	0.76155	13.1917	-1.4821	13.1918	-1.45745	13.1917	-1.36785
13.2	-1.19915	13.2003	-1.2352	13.2003	-1.5941	13.2003	-1.26965	13.2002	0.75675	13.2	-1.4931	13.2002	-1.4716	13.2	-1.3844
13.2083	-1.2123	13.2087	-1.2516	13.2087	-1.60445	13.2087	-1.28295	13.2085	0.7499	13.2083	-1.50395	13.2085	-1.48545	13.2083	-1.3987
13.2167	-1.2247	13.217	-1.26755	13.217	-1.61485	13.217	-1.29535	13.2168	0.7437	13.2167	-1.5158	13.2168	-1.49845	13.2167	-1.4127
13.225	-1.2368	13.2253	-1.28005	13.2253	-1.6248	13.2253	-1.3074	13.2252	0.7339	13.225	-1.5245	13.2252	-1.5057	13.225	-1.42265
13.2333	-1.2494	13.2337	-1.2952	13.2337	-1.63305	13.2337	-1.3165	13.2335	0.7252	13.2333	-1.5332	13.2335	-1.5194	13.2333	-1.4366
13.2417	-1.25765	13.242	-1.3052	13.242	-1.64025	13.242	-1.32695	13.2418	0.7156	13.2417	-1.54165	13.2418	-1.52705	13.2417	-1.4456
13.25	-1.2712	13.2503	-1.3185	13.2503	-1.64925	13.2503	-1.33575	13.2502	0.70245	13.25	-1.55185	13.2502	-1.53905	13.25	-1.4579
13.2583	-1.27805	13.2587	-1.3307	13.2587	-1.65395	13.2587	-1.34415	13.2585	0.6887	13.2583	-1.5574	13.2585	-1.5453	13.2583	-1.4658
13.2667	-1.2855	13.267	-1.3383	13.267	-1.656	13.267	-1.3481	13.2668	0.6739	13.2667	-1.5621	13.2668	-1.5513	13.2667	-1.47215
13.275	-1.2931	13.2753	-1.34715	13.2753	-1.66555	13.2753	-1.3557	13.2752	0.6608	13.275	-1.56695	13.2752	-1.5593	13.275	-1.48035
13.2833	-1.2988	13.2837	-1.35625	13.2837	-1.66945	13.2837	-1.3612	13.2835	0.64595	13.2833	-1.57215	13.2835	-1.5636	13.2833	-1.48685
13.2917	-1.3042	13.292	-1.36235	13.292	-1.67465	13.292	-1.3668	13.2918	0.63195	13.2917	-1.5761	13.2918	-1.56775	13.2917	-1.4933
13.3	-1.3096	13.3003	-1.36765	13.3003	-1.67885	13.3003	-1.37155	13.3002	0.61555	13.3	-1.5805	13.3002	-1.5705	13.3	-1.49905
13.3083	-1.3136	13.3087	-1.37425	13.3087	-1.6818	13.3087	-1.37355	13.3085	0.60285	13.3083	-1.58235	13.3085	-1.5752	13.3083	-1.50495
13.3167	-1.317	13.317	-1.37895	13.317	-1.6828	13.317	-1.37745	13.3168	0.588	13.3167	-1.58475	13.3168	-1.5779	13.3167	-1.50785
13.325	-1.319	13.3253	-1.38335	13.3253	-1.68475	13.3253	-1.38005	13.3252	0.57415	13.325	-1.5885	13.3252	-1.58055	13.325	-1.51275
13.3333	-1.3214	13.3337	-1.3863	13.3337	-1.68465	13.3337	-1.38395	13.3335	0.5626	13.3333	-1.5884	13.3335	-1.58085	13.3333	-1.51415
13.3417	-1.3254	13.342	-1.3906	13.342	-1.6874	13.342	-1.3858	13.3418	0.5485	13.3417	-1.5917	13.3418	-1.5815	13.3417	-1.5192
13.35	-1.3294	13.3503	-1.3962	13.3503	-1.68945	13.3503	-1.38975	13.3502	0.5342	13.35	-1.5931	13.3502	-1.5859	13.35	-1.5218
13.3583	-1.33165	13.3587	-1.3986	13.3587	-1.69165	13.3587	-1.3934	13.3585	0.52255	13.3583	-1.5972	13.3585	-1.58665	13.3583	-1.52695
13.3667	-1.3324	13.367	-1.40065	13.367	-1.69105	13.367	-1.39615	13.3668	0.5112	13.3667	-1.5982	13.3668	-1.5852	13.3667	-1.52715
13.375	-1.33485	13.3753	-1.4027	13.3753	-1.69255	13.3753	-1.39675	13.3752	0.50365	13.375	-1.5981	13.3752	-1.58885	13.375	-1.5306
13.3833	-1.3371	13.3837	-1.4065	13.3837	-1.6945	13.3837	-1.3992	13.3835	0.4934	13.3833	-1.60055	13.3835	-1.5895	13.3833	-1.5339
13.3917	-1.33745	13.392	-1.40615	13.392	-1.6939	13.392	-1.4003	13.3918	0.48415	13.3917	-1.59865	13.3918	-1.59025	13.3917	-1.534
13.4	-1.3403	13.4003	-1.4121	13.4003	-1.6953	13.4003	-1.4043	13.4002	0.4767	13.4	-1.6003	13.4002	-1.59285	13.4	-1.53925
13.4083	-1.3415	13.4087	-1.41215	13.4087	-1.69405	13.4087	-1.4046	13.4085	0.47005	13.4083	-1.5985	13.4085	-1.59005	13.4083	-1.5396
13.4167	-1.3414	13.417	-1.41435	13.417	-1.695	13.417	-1.4072	13.4168	0.465	13.4167	-1.60275	13.4168	-1.5879	13.4167	-1.54165
13.425	-1.33955	13.4253	-1.4133	13.4253	-1.6924	13.4253	-1.40675	13.4252	0.4587	13.425	-1.5986	13.4252	-1.5862	13.425	-1.5427
13.4333	-1.34285	13.4337	-1.41865	13.4337	-1.69515	13.4337	-1.409	13.4335	0.4551	13.4333	-1.60325	13.4335	-1.58635	13.4333	-1.5459
13.4417	-1.3432	13.442	-1.4196	13.442	-1.696	13.442	-1.41015	13.4418	0.4535	13.4417	-1.6041	13.4418	-1.58215	13.4417	-1.54785
13.45	-1.3452	13.4503	-1.4206	13.4503	-1.69425	13.4503	-1.41195	13.4502	0.447	13.45	-1.60325	13.4502	-1.57795	13.45	-1.55025
13.4583	-1.34595	13.4587	-1.4241	13.4587	-1.6954	13.4587	-1.4125	13.4585	0.44675	13.4583	-1.60485	13.4585	-1.57215	13.4583	-1.55185
13.4667	-1.34745	13.467	-1.4235	13.467	-1.69635	13.467	-1.4128	13.4668	0.44685	13.4667	-1.60515	13.4668	-1.56545	13.4667	-1.55245
13.475	-1.35165	13.4753	-1.4303	13.4753	-1.699	13.4753	-1.4151	13.4752	0.44505	13.475	-1.60735	13.4752	-1.5578	13.475	-1.5579
13.4833	-1.3487	13.4837	-1.4282	13.4837	-1.6964	13.4837	-1.4129	13.4835	0.44295	13.4833	-1.60405	13.4835	-1.54305	13.4833	-1.5541
13.4917	-1.3496	13.492	-1.4284	13.492	-1.69655	13.492	-1.40985	13.4918	0.4424	13.4917	-1.60435	13.4918	-1.5277	13.4917	-1.5549
13.5	-1.3508	13.5003	-1.42665	13.5003	-1.69495	13.5003	-1.40745	13.5002	0.44295	13.5	-1.6037	13.5002	-1.5097	13.5	-1.5566
13.5083	-1.3514	13.5087	-1.42865	13.5087	-1.6958	13.5087	-1.4076	13.5085	0.4417	13.5083	-1.60325	13.5085	-1.4936	13.5083	-1.55675
13.5167	-1.3526	13.517	-1.4293	13.517	-1.69365	13.517	-1.4035	13.5168	0.44185	13.5167	-1.6041	13.5168	-1.4693	13.5167	-1.556
13.525	-1.35525	13.5253	-1.42995	13.5253	-1.69595	13.5253	-1.4011	13.5252	0.4448	13.525	-1.60505	13.5252	-1.44975	13.525	-1.55605
13.5333	-1.3526	13.5337	-1.4283	13.5337	-1.69365	13.5337	-1.3959	13.5335	0.44255	13.5333	-1.60335	13.5335	-1.42645	13.5333	-1.55285
13.5417	-1.3518	13.542	-1.42655	13.542	-1.6943	13.542	-1.39065	13.5418	0.4435	13.5417	-1.6021	13.5418	-1.3987	13.5417	-1.5497
13.55	-1.3517	13.5503	-1.42135	13.5503	-1.6898	13.5503	-1.38375	13.5502	0.44505	13.55	-1.59905	13.5502	-1.37175	13.55	-1.5466
13.5583	-1.35325	13.5587	-1.42	13.5587	-1.6886	13.5587	-1.3786	13.5585	0.4443	13.5583	-1.5991	13.5585	-1.3453	13.5583	-1.54335
13.5667	-1.35455	13.567	-1.41715	13.567	-1.68675	13.567	-1.37155	13.5668	0.44525	13.5667	-1.5995	13.5668	-1.3207	13.5667	-1.5399
13.575	-1.35235	13.5753	-1.4111	13.5753	-1.68385	13.5753	-1.3616	13.5752	0.4445	13.575	-1.59865	13.5752	-1.295	13.575	-1.53525
13.5833	-1.3551	13.5837	-1.4052	13.5837	-1.6767	13.5837	-1.3534	13.5835	0.4451	13.5833	-1.59505	13.5835	-1.27025	13.5833	-1.52805
13.5917	-1.35325	13.592	-1.39995	13.592	-1.672	13.592	-1.3414	13.5918	0.44495	13.5917	-1.5924	13.5918	-1.2475	13.5917	-1.51945
13.6	-1.35395	13.6003	-1.39385	13.6003	-1.6659	13.6003	-1.334	13.6002	0.4436	13.6	-1.5885	13.6002	-1.2264	13.6	-1.5137
13.6083	-1.35425	13.6087	-1.3869	13.6087	-1.66045	13.6087	-1.3252	13.6085	0.446	13.6083	-1.58465	13.6085	-1.20775	13.6083	-1.50565
13.6167	-1.35255	13.617	-1.37555	13.617	-1.6506	13.617	-1.3119	13.6168	0.44365	13.6167	-1.5792	13.6168	-1.1898	13.6167	-1.49595
13.625	-1.35335	13.6253	-1.3697	13.6253	-1.64455	13.6253	-1.3028	13.6252	0.44555	13.625	-1.57495	13.6252	-1.1738	13.625	-1.4874
13.6333	-1.35415	13.6337	-1.3616	13.6337	-1.63605	13.6337	-1.2934	13.6335	0.4476	13.6333	-1.5681	13.6335	-1.16155	13.6333	-1.47935
13.6417	-1.3531	13.642	-1.35285	13.642	-1.62685	13.642	-1.2815	13.6418	0.45105	13.6417	-1.56475	13.6418	-1.14655	13.6417	-1.47055
13.65	-1.3534	13.6503	-1.34245	13.6503	-1.61595	13.6503	-1.27165	13.6502	0.454	13.65	-1.55495	13.6502	-1.13175	13.65	-1.4589
13.6583	-1.35115	13.6587	-1.33195	13.6587	-1.60475	13.6587	-1.25745	13.6585	0.4585	13.6583	-1.5473	13.6585	-1.11735	13.6583	-1.4472
13.6667	-1.34935	13.667	-1.3192	13.667	-1.5912	13.667	-1.2445	13.6668	0.46205	13.6667	-1.53795	13.6668	-1.1044	13.6667	-1.4348
13.675	-1.35015	13.6753	-1.3092	13.6753	-1.57755	13.6753	-1.2302	13.6752	0.46915	13.675	-1.5277	13.6752	-1.08945	13.675	-1.42485
13.6833	-1.3557	13.6837	-1.3018	13.6837	-1.56955	13.6837	-1.21935	13.6835	0.4785	13.6833	-1.524	13.6835	-1.07835	13.6833	-1.419
13.6917	-1.35505	13.692	-1.29	13.692	-1.55265	13.692	-1.20375	13.6918	0.48975	13.6917	-1.5148	13.6918	-1.06235	13.6917	-1.40635
13.7	-1.3484	13.7003	-1.27335	13.7003	-1.5293	13.7003	-1.17785	13.7002	0.50335	13.7	-1.50075	13.7002	-1.03745	13.7	-1.39015
13.7083	-1.34795	13.7087	-1.2586	13.7087	-1.51	13.7087	-1.153	13.7085	0.5209	13.7083	-1.48945	13.7085	-1.0161	13.7083	-1.3766
13.7167	-1.35315	13.717	-1.2448	13.717	-1.489	13.717	-1.127	13.7168	0.538	13.7167	-1.4791	13.7168	-0.9943	13.7167	-1.3642
13.725	-1.3534	13.7253	-1.2277	13.7253	-1.4611	13.7253	-1.09435	13.7252	0.55885	13.725	-1.46435	13.7252	-0.96615	13.725	-1.34435
13.7333	-1.355	13.7337	-1.20725	13.7337	-1.42995	13.7337	-1.05705	13.7335	0.5811	13.7333	-1.45035	13.7335	-0.935	13.7333	-1.32535
13.7417	-1.3564	13.742	-1.18265	13.742	-1.39275	13.742	-1.01525	13.7418	0.6044	13.7417	-1.4328	13.7418	-0.9016	13.7417	-1.3001
13.75	-1.35585	13.7503	-1.1519	13.7503	-1.3517	13.7503	-0.97045	13.7502	0.6311	13.75	-1.41335	13.7502	-0.86345	13.75	-1.27
13.7583	-1.354	13.7587	-1.11715	13.7587	-1.3037	13.7587	-0.92005	13.7585	0.6597	13.7583	-1.3905	13.7585	-0.82425	13.7583	-1.2367
13.7667	-1.3541	13.767	-1.0737	13.767	-1.25515	13.767	-0.87205	13.7668	0.68765	13.7667	-1.36615	13.7668	-0.7852	13.7667	-1.1969
13.775	-1.355	13.7753	-1.02805	13.7753	-1.20315	13.7753	-0.82205	13.7752	0.71855	13.775	-1.3369	13.7752	-0.74685	13.775	-1.15585
13.7833	-1.3571	13.7837	-0.9759	13.7837	-1.1502	13.7837	-0.77305	13.7835	0.7514	13.7833	-1.30905	13.7835	-0.7075	13.7833	-1.1114
13.7917	-1.3558	13.792	-0.92005	13.792	-1.09635	13.792	-0.72415	13.7918	0.786	13.7917	-1.27695	13.7918	-0.67155	13.7917	-1.0631
13.8	-1.35525	13.8003	-0.8623	13.8003	-1.04625	13.8003	-0.6813	13.8002	0.82005	13.8	-1.24825	13.8002	-0.6401	13.8	-1.01605
13.8083	-1.3584	13.8087	-0.80465	13.8087	-1.00105	13.8087	-0.6428	13.8085	0.8593	13.8083	-1.2184	13.8085	-0.61245	13.8083	-0.96815
13.8167	-1.3564	13.817	-0.7469	13.817	-0.9573	13.817	-0.6094	13.8168	0.8995	13.8167	-1.18915	13.8168	-0.5898	13.8167	-0.92
13.825	-1.35595	13.8253	-0.69185	13.8253	-0.9159	13.8253	-0.58025	13.8252	0.94805	13.825	-1.15905	13.8252	-0.572	13.825	-0.8778
13.8333	-1.3557	13.8337	-0.6383	13.8337	-0.8822	13.8337	-0.5578	13.8335	0.99985	13.8333	-1.1332	13.8335	-0.5585	13.8333	-0.83585
13.8417	-1.3586	13.842	-0.5945	13.842	-0.85795	13.842	-0.5435	13.8418	1.06255	13.8417	-1.11365	13.8418	-0.5547	13.8417	-0.8015
13.85	-1.357	13.8503	-0.5539	13.8503	-0.8365	13.8503	-0.5307	13.8502	1.1355	13.85	-1.09135	13.8502	-0.55475	13.85	-0.7701
13.8583	-1.35715	13.8587	-0.52095	13.8587	-0.8233	13.8587	-0.5275	13.8585	1.22375	13.8583	-1.0773	13.8585	-0.5575	13.8583	-0.74505
13.8667	-1.3585	13.867	-0.4958	13.867	-0.81635	13.867	-0.5301	13.8668	1.3245	13.8667	-1.0683	13.8668	-0.5674	13.8667	-0.727
13.875	-1.35975	13.8753	-0.47745	13.8753	-0.8148	13.8753	-0.5345	13.8752	1.44545	13.875	-1.0611	13.8752	-0.58255	13.875	-0.7152
13.8833	-1.35835	13.8837	-0.46245	13.8837	-0.8169	13.8837	-0.54535	13.8835	1.5816	13.8833	-1.0533	13.8835	-0.6012	13.8833	-0.7073
13.8917	-1.35865	13.892	-0.45795	13.892	-0.82295	13.892	-0.55655	13.8918	1.729	13.8917	-1.0532	13.8918	-0.6231	13.8917	-0.70615
13.9	-1.35775	13.9003	-0.45745	13.9003	-0.8377	13.9003	-0.57565	13.9002	1.88515	13.9	-1.05645	13.9002	-0.6478	13.9	-0.71025
13.9083	-1.3598	13.9087	-0.4655	13.9087	-0.8539	13.9087	-0.595	13.9085	2.04745	13.9083	-1.0609	13.9085	-0.6746	13.9083	-0.71875
13.9167	-1.36085	13.917	-0.47715	13.917	-0.87375	13.917	-0.616	13.9168	2.2065	13.9167	-1.07015	13.9168	-0.7033	13.9167	-0.73265
13.925	-1.36185	13.9253	-0.4918	13.9253	-0.8936	13.9253	-0.6396	13.9252	2.36045	13.925	-1.07985	13.9252	-0.73085	13.925	-0.74935
13.9333	-1.35965	13.9337	-0.5101	13.9337	-0.9151	13.9337	-0.6604	13.9335	2.50075	13.9333	-1.0916	13.9335	-0.7614	13.9333	-0.7652
13.9417	-1.36205	13.942	-0.5349	13.942	-0.94075	13.942	-0.6879	13.9418	2.62515	13.9417	-1.1052	13.9418	-0.7915	13.9417	-0.7866
13.95	-1.36135	13.9503	-0.5573	13.9503	-0.96415	13.9503	-0.7101	13.9502	2.7324	13.95	-1.11995	13.9502	-0.8224	13.95	-0.81005
13.9583	-1.362	13.9587	-0.58145	13.9587	-0.9883	13.9587	-0.73545	13.9585	2.81895	13.9583	-1.13635	13.9585	-0.84985	13.9583	-0.83
13.9667	-1.36415	13.967	-0.60655	13.967	-1.0138	13.967	-0.7599	13.9668	2.8822	13.9667	-1.15135	13.9668	-0.8806	13.9667	-0.85525
13.975	-1.3643	13.9753	-0.6309	13.9753	-1.0374	13.9753	-0.78175	13.9752	2.9223	13.975	-1.168	13.9752	-0.9096	13.975	-0.8769
13.9833	-1.36385	13.9837	-0.65635	13.9837	-1.06035	13.9837	-0.80675	13.9835	2.94295	13.9833	-1.18345	13.9835	-0.93415	13.9833	-0.89905
13.9917	-1.3651	13.992	-0.68005	13.992	-1.083	13.992	-0.82925	13.9918	2.94295	13.9917	-1.20005	13.9918	-0.959	13.9917	-0.92045
14	-1.3674	14.0003	-0.70545	14.0003	-1.10505	14.0003	-0.85135	14.0002	2.92535	14	-1.2145	14.0002	-0.9843	14	-0.94505
14.0083	-1.3666	14.0087	-0.7253	14.0087	-1.1237	14.0087	-0.8696	14.0085	2.89255	14.0083	-1.2305	14.0085	-1.00545	14.0083	-0.9624
14.0167	-1.36655	14.017	-0.7447	14.017	-1.1416	14.017	-0.89055	14.0168	2.8447	14.0167	-1.24305	14.0168	-1.02755	14.0167	-0.9812
14.025	-1.3684	14.0253	-0.76325	14.0253	-1.1607	14.0253	-0.90935	14.0252	2.78695	14.025	-1.2582	14.0252	-1.04745	14.025	-0.9979
14.0333	-1.37045	14.0337	-0.78205	14.0337	-1.177	14.0337	-0.92955	14.0335	2.7162	14.0333	-1.27095	14.0335	-1.0659	14.0333	-1.01545
14.0417	-1.36995	14.042	-0.79825	14.042	-1.1927	14.042	-0.94595	14.0418	2.6389	14.0417	-1.2817	14.0418	-1.08185	14.0417	-1.0336
14.05	-1.36915	14.0503	-0.8115	14.0503	-1.20495	14.0503	-0.9613	14.0502	2.55695	14.05	-1.29255	14.0502	-1.09745	14.05	-1.046
14.0583	-1.36845	14.0587	-0.8217	14.0587	-1.21575	14.0587	-0.9757	14.0585	2.46885	14.0583	-1.3006	14.0585	-1.11215	14.0583	-1.0583
14.0667	-1.37085	14.067	-0.83575	14.067	-1.2297	14.067	-0.9941	14.0668	2.3795	14.0667	-1.31035	14.0668	-1.1267	14.0667	-1.0712
14.075	-1.36985	14.0753	-0.84315	14.0753	-1.2376	14.0753	-1.00685	14.0752	2.2885	14.075	-1.32115	14.0752	-1.1401	14.075	-1.08255
14.0833	-1.37185	14.0837	-0.8524	14.0837	-1.24675	14.0837	-1.0214	14.0835	2.19595	14.0833	-1.3295	14.0835	-1.1506	14.0833	-1.0932
14.0917	-1.3722	14.092	-0.8606	14.092	-1.25385	14.092	-1.03645	14.0918	2.1024	14.0917	-1.3369	14.0918	-1.1623	14.0917	-1.1048
14.1	-1.37435	14.1003	-0.86895	14.1003	-1.2606	14.1003	-1.0509	14.1002	2.00615	14.1	-1.34605	14.1002	-1.17435	14.1	-1.11475
14.1083	-1.37185	14.1087	-0.8711	14.1087	-1.2637	14.1087	-1.06095	14.1085	1.918	14.1083	-1.35185	14.1085	-1.1833	14.1083	-1.1202
14.1167	-1.3743	14.117	-0.8761	14.117	-1.2689	14.117	-1.07225	14.1168	1.8268	14.1167	-1.3575	14.1168	-1.19445	14.1167	-1.12805
14.125	-1.37465	14.1253	-0.8787	14.1253	-1.2694	14.1253	-1.0844	14.1252	1.73905	14.125	-1.36175	14.1252	-1.2034	14.125	-1.13465
14.1333	-1.3738	14.1337	-0.8806	14.1337	-1.2689	14.1337	-1.0934	14.1335	1.6538	14.1333	-1.36505	14.1335	-1.21055	14.1333	-1.14035
14.1417	-1.3726	14.142	-0.88155	14.142	-1.2697	14.142	-1.10405	14.1418	1.57175	14.1417	-1.36835	14.1418	-1.2198	14.1417	-1.14505
14.15	-1.3731	14.1503	-0.8784	14.1503	-1.267	14.1503	-1.1143	14.1502	1.49095	14.15	-1.3712	14.1502	-1.2243	14.15	-1.14775
14.1583	-1.37405	14.1587	-0.88175	14.1587	-1.2666	14.1587	-1.1246	14.1585	1.4173	14.1583	-1.3754	14.1585	-1.23265	14.1583	-1.15345
14.1667	-1.3758	14.167	-0.8817	14.167	-1.2678	14.167	-1.1335	14.1668	1.345	14.1667	-1.37945	14.1668	-1.2401	14.1667	-1.15935
14.175	-1.3758	14.1753	-0.8804	14.1753	-1.26625	14.1753	-1.14295	14.1752	1.2771	14.175	-1.3814	14.1752	-1.24915	14.175	-1.16475
14.1833	-1.3743	14.1837	-0.87945	14.1837	-1.26555	14.1837	-1.15125	14.1835	1.2134	14.1833	-1.3819	14.1835	-1.25515	14.1833	-1.16705
14.1917	-1.3747	14.192	-0.87905	14.192	-1.26545	14.192	-1.1573	14.1918	1.1533	14.1917	-1.386	14.1918	-1.26065	14.1917	-1.1712
14.2	-1.37565	14.2003	-0.88	14.2003	-1.2667	14.2003	-1.16865	14.2002	1.09435	14.2	-1.3886	14.2002	-1.268	14.2	-1.1753
14.2083	-1.3748	14.2087	-0.8774	14.2087	-1.269	14.2087	-1.175	14.2085	1.0428	14.2083	-1.39065	14.2085	-1.276	14.2083	-1.18025
14.2167	-1.3755	14.217	-0.87745	14.217	-1.2731	14.217	-1.1837	14.2168	0.99595	14.2167	-1.39335	14.2168	-1.28365	14.2167	-1.18375
14.225	-1.3754	14.2253	-0.8789	14.2253	-1.27635	14.2253	-1.19085	14.2252	0.9502	14.225	-1.3965	14.2252	-1.28945	14.225	-1.1894
14.2333	-1.37625	14.2337	-0.87835	14.2337	-1.2819	14.2337	-1.20015	14.2335	0.9057	14.2333	-1.4015	14.2335	-1.2968	14.2333	-1.19255
14.2417	-1.3769	14.242	-0.8816	14.242	-1.28765	14.242	-1.2068	14.2418	0.8667	14.2417	-1.40545	14.2418	-1.30215	14.2417	-1.19425
14.25	-1.3773	14.2503	-0.88625	14.2503	-1.2959	14.2503	-1.21475	14.2502	0.83215	14.25	-1.4108	14.2502	-1.31045	14.25	-1.20235
14.2583	-1.3796	14.2587	-0.8889	14.2587	-1.30855	14.2587	-1.22385	14.2585	0.7988	14.2583	-1.41915	14.2585	-1.319	14.2583	-1.2082
14.2667	-1.3771	14.267	-0.89365	14.267	-1.31855	14.267	-1.23085	14.2668	0.7697	14.2667	-1.4269	14.2668	-1.3278	14.2667	-1.2157
14.275	-1.3782	14.2753	-0.8986	14.2753	-1.33	14.2753	-1.23685	14.2752	0.74315	14.275	-1.4337	14.2752	-1.33535	14.275	-1.2198
14.2833	-1.37965	14.2837	-0.9049	14.2837	-1.34205	14.2837	-1.24515	14.2835	0.7182	14.2833	-1.44095	14.2835	-1.3414	14.2833	-1.22575
14.2917	-1.3803	14.292	-0.9128	14.292	-1.3575	14.292	-1.25235	14.2918	0.69255	14.2917	-1.4501	14.2918	-1.35055	14.2917	-1.2335
14.3	-1.3795	14.3003	-0.9207	14.3003	-1.37265	14.3003	-1.25765	14.3002	0.66965	14.3	-1.45725	14.3002	-1.35875	14.3	-1.2416
14.3083	-1.37935	14.3087	-0.92805	14.3087	-1.3882	14.3087	-1.26445	14.3085	0.6487	14.3083	-1.46485	14.3085	-1.36705	14.3083	-1.24905
14.3167	-1.37955	14.317	-0.93955	14.317	-1.4051	14.317	-1.27325	14.3168	0.6299	14.3167	-1.47535	14.3168	-1.37665	14.3167	-1.25925
14.325	-1.37995	14.3253	-0.94645	14.3253	-1.42035	14.3253	-1.27925	14.3252	0.60995	14.325	-1.4853	14.3252	-1.38345	14.325	-1.2658
14.3333	-1.37845	14.3337	-0.9576	14.3337	-1.43415	14.3337	-1.28425	14.3335	0.5946	14.3333	-1.49255	14.3335	-1.39185	14.3333	-1.27485
14.3417	-1.38205	14.342	-0.97075	14.342	-1.4535	14.342	-1.28975	14.3418	0.5795	14.3417	-1.50325	14.3418	-1.4026	14.3417	-1.28535
14.35	-1.38135	14.3503	-0.98505	14.3503	-1.47105	14.3503	-1.29985	14.3502	0.5654	14.35	-1.5127	14.3502	-1.4142	14.35	-1.2941
14.3583	-1.3837	14.3587	-0.9983	14.3587	-1.48815	14.3587	-1.30655	14.3585	0.54995	14.3583	-1.52265	14.3585	-1.42345	14.3583	-1.3057
14.3667	-1.38345	14.367	-1.01055	14.367	-1.5031	14.367	-1.3111	14.3668	0.5388	14.3667	-1.5306	14.3668	-1.4313	14.3667	-1.31425
14.375	-1.38185	14.3753	-1.0242	14.3753	-1.51765	14.3753	-1.3187	14.3752	0.5269	14.375	-1.5374	14.3752	-1.4404	14.375	-1.3247
14.3833	-1.38285	14.3837	-1.03945	14.3837	-1.53485	14.3837	-1.3267	14.3835	0.5159	14.3833	-1.5471	14.3835	-1.45185	14.3833	-1.33645
14.3917	-1.383	14.392	-1.05665	14.392	-1.5523	14.392	-1.3336	14.3918	0.5063	14.3917	-1.55635	14.3918	-1.46245	14.3917	-1.34805
14.4	-1.38375	14.4003	-1.07025	14.4003	-1.56575	14.4003	-1.34065	14.4002	0.4977	14.4	-1.56275	14.4002	-1.4724	14.4	-1.3563
14.4083	-1.38515	14.4087	-1.0849	14.4087	-1.5797	14.4087	-1.3478	14.4085	0.4885	14.4083	-1.5711	14.4085	-1.48045	14.4083	-1.3671
14.4167	-1.38525	14.417	-1.09885	14.417	-1.5923	14.417	-1.35425	14.4168	0.47785	14.4167	-1.5789	14.4168	-1.48745	14.4167	-1.37985
14.425	-1.38655	14.4253	-1.1146	14.4253	-1.6049	14.4253	-1.3603	14.4252	0.46895	14.425	-1.58435	14.4252	-1.49875	14.425	-1.39075
14.4333	-1.3849	14.4337	-1.12665	14.4337	-1.6146	14.4337	-1.366	14.4335	0.4639	14.4333	-1.5887	14.4335	-1.50625	14.4333	-1.39975
14.4417	-1.3882	14.442	-1.14145	14.442	-1.625	14.442	-1.37185	14.4418	0.457	14.4417	-1.5936	14.4418	-1.5131	14.4417	-1.4078
14.45	-1.38615	14.4503	-1.15565	14.4503	-1.63495	14.4503	-1.3773	14.4502	0.44995	14.45	-1.59945	14.4502	-1.5234	14.45	-1.41615
14.4583	-1.3867	14.4587	-1.17045	14.4587	-1.64415	14.4587	-1.38505	14.4585	0.44425	14.4583	-1.60695	14.4585	-1.53085	14.4583	-1.4274
14.4667	-1.3884	14.467	-1.18425	14.467	-1.65225	14.467	-1.3949	14.4668	0.43925	14.4667	-1.6113	14.4668	-1.53805	14.4667	-1.43585
14.475	-1.3875	14.4753	-1.1953	14.4753	-1.6614	14.4753	-1.3987	14.4752	0.4341	14.475	-1.61685	14.4752	-1.5445	14.475	-1.4451
14.4833	-1.38865	14.4837	-1.20945	14.4837	-1.67035	14.4837	-1.4071	14.4835	0.4281	14.4833	-1.61935	14.4835	-1.5526	14.4833	-1.45275
14.4917	-1.38665	14.492	-1.221	14.492	-1.67455	14.492	-1.41165	14.4918	0.42135	14.4917	-1.62235	14.4918	-1.55895	14.4917	-1.46085
14.5	-1.3907	14.5003	-1.2363	14.5003	-1.68345	14.5003	-1.4205	14.5002	0.4168	14.5	-1.62765	14.5002	-1.5685	14.5	-1.4702
14.5083	-1.3872	14.5087	-1.2456	14.5087	-1.68865	14.5087	-1.42535	14.5085	0.4125	14.5083	-1.62945	14.5085	-1.57485	14.5083	-1.47615
14.5167	-1.38575	14.517	-1.25655	14.517	-1.69305	14.517	-1.4329	14.5168	0.4074	14.5167	-1.6342	14.5168	-1.5792	14.5167	-1.48455
14.525	-1.38505	14.5253	-1.2667	14.5253	-1.6985	14.5253	-1.4393	14.5252	0.405	14.525	-1.63755	14.5252	-1.58525	14.525	-1.49425
14.5333	-1.38665	14.5337	-1.27875	14.5337	-1.70415	14.5337	-1.44445	14.5335	0.4025	14.5333	-1.639	14.5335	-1.5901	14.5333	-1.4999
14.5417	-1.3874	14.542	-1.28955	14.542	-1.7085	14.542	-1.4514	14.5418	0.3975	14.5417	-1.6409	14.5418	-1.59725	14.5417	-1.5098
14.55	-1.38905	14.5503	-1.29905	14.5503	-1.71305	14.5503	-1.4574	14.5502	0.3943	14.55	-1.64395	14.5502	-1.602	14.55	-1.5152
14.5583	-1.38965	14.5587	-1.30835	14.5587	-1.71645	14.5587	-1.46585	14.5585	0.39095	14.5583	-1.6468	14.5585	-1.60735	14.5583	-1.5211
14.5667	-1.389	14.567	-1.31825	14.567	-1.72055	14.567	-1.47165	14.5668	0.387	14.5667	-1.6486	14.5668	-1.6129	14.5667	-1.5281
14.575	-1.3861	14.5753	-1.3227	14.5753	-1.7207	14.5753	-1.4749	14.5752	0.38385	14.575	-1.6482	14.5752	-1.6145	14.575	-1.52915
14.5833	-1.3851	14.5837	-1.3299	14.5837	-1.72175	14.5837	-1.4786	14.5835	0.38115	14.5833	-1.6496	14.5835	-1.61855	14.5833	-1.5357
14.5917	-1.3873	14.592	-1.3403	14.592	-1.72565	14.592	-1.4838	14.5918	0.37965	14.5917	-1.65165	14.5918	-1.62415	14.5917	-1.5417
14.6	-1.38895	14.6003	-1.35185	14.6003	-1.72855	14.6003	-1.4884	14.6002	0.3802	14.6	-1.65455	14.6002	-1.62835	14.6	-1.54655
14.6083	-1.38975	14.6087	-1.3587	14.6087	-1.7337	14.6087	-1.49495	14.6085	0.37595	14.6083	-1.6564	14.6085	-1.63265	14.6083	-1.5526
14.6167	-1.3874	14.617	-1.3651	14.617	-1.73285	14.617	-1.49685	14.6168	0.37485	14.6167	-1.6564	14.6168	-1.63515	14.6167	-1.55495
14.625	-1.38855	14.6253	-1.37055	14.6253	-1.73605	14.6253	-1.5005	14.6252	0.3753	14.625	-1.65565	14.6252	-1.63815	14.625	-1.5594
14.6333	-1.3895	14.6337	-1.37885	14.6337	-1.73805	14.6337	-1.50395	14.6335	0.3714	14.6333	-1.65675	14.6335	-1.6434	14.6333	-1.56445
14.6417	-1.38975	14.642	-1.3863	14.642	-1.7388	14.642	-1.5076	14.6418	0.3697	14.6417	-1.6611	14.6418	-1.6467	14.6417	-1.56875
14.65	-1.3887	14.6503	-1.39225	14.6503	-1.74135	14.6503	-1.51065	14.6502	0.3669	14.65	-1.65995	14.6502	-1.6491	14.65	-1.5755
14.6583	-1.38935	14.6587	-1.39825	14.6587	-1.74195	14.6587	-1.51185	14.6585	0.36525	14.6583	-1.6586	14.6585	-1.6509	14.6583	-1.57925
14.6667	-1.39035	14.667	-1.4055	14.667	-1.74475	14.667	-1.5178	14.6668	0.36215	14.6667	-1.6629	14.6668	-1.65485	14.6667	-1.5845
14.675	-1.38885	14.6753	-1.40945	14.6753	-1.7442	14.6753	-1.51905	14.6752	0.36085	14.675	-1.66245	14.6752	-1.65725	14.675	-1.58505
14.6833	-1.3897	14.6837	-1.41525	14.6837	-1.7456	14.6837	-1.5201	14.6835	0.3573	14.6833	-1.66375	14.6835	-1.6603	14.6833	-1.58905
14.6917	-1.38985	14.692	-1.42065	14.692	-1.7474	14.692	-1.5244	14.6918	0.358	14.6917	-1.665	14.6918	-1.6649	14.6917	-1.59285
14.7	-1.3884	14.7003	-1.4263	14.7003	-1.74945	14.7003	-1.5259	14.7002	0.3536	14.7	-1.665	14.7002	-1.66615	14.7	-1.59445
14.7083	-1.38945	14.7087	-1.43135	14.7087	-1.75125	14.7087	-1.52615	14.7085	0.3505	14.7083	-1.66765	14.7085	-1.66835	14.7083	-1.59965
14.7167	-1.38925	14.717	-1.43605	14.717	-1.7529	14.717	-1.52795	14.7168	0.34945	14.7167	-1.6677	14.7168	-1.6711	14.7167	-1.6028
14.725	-1.38735	14.7253	-1.44035	14.7253	-1.7527	14.7253	-1.5272	14.7252	0.34905	14.725	-1.66875	14.7252	-1.6704	14.725	-1.6045
14.7333	-1.38705	14.7337	-1.44345	14.7337	-1.7527	14.7337	-1.52885	14.7335	0.34635	14.7333	-1.6697	14.7335	-1.6716	14.7333	-1.6068
14.7417	-1.38675	14.742	-1.44935	14.742	-1.75445	14.742	-1.5274	14.7418	0.34545	14.7417	-1.6692	14.7418	-1.67255	14.7417	-1.6084
14.75	-1.38785	14.7503	-1.45185	14.7503	-1.75365	14.7503	-1.52835	14.7502	0.3424	14.75	-1.66725	14.7502	-1.6712	14.75	-1.6094
14.7583	-1.3871	14.7587	-1.4551	14.7587	-1.7556	14.7587	-1.5293	14.7585	0.34195	14.7583	-1.6674	14.7585	-1.67185	14.7583	-1.6121
14.7667	-1.3878	14.767	-1.45775	14.767	-1.75375	14.767	-1.529	14.7668	0.34	14.7667	-1.66645	14.7668	-1.67095	14.7667	-1.6109
14.775	-1.38665	14.7753	-1.46025	14.7753	-1.7552	14.7753	-1.5273	14.7752	0.3384	14.775	-1.6675	14.7752	-1.66875	14.775	-1.6137
14.7833	-1.38635	14.7837	-1.465	14.7837	-1.75465	14.7837	-1.52695	14.7835	0.3368	14.7833	-1.66825	14.7835	-1.6687	14.7833	-1.6154
14.7917	-1.38865	14.792	-1.46875	14.792	-1.75555	14.792	-1.5242	14.7918	0.33535	14.7917	-1.668	14.7918	-1.66795	14.7917	-1.618
14.8	-1.38665	14.8003	-1.46915	14.8003	-1.7543	14.8003	-1.52155	14.8002	0.3337	14.8	-1.6668	14.8002	-1.6659	14.8	-1.61605
14.8083	-1.3867	14.8087	-1.47305	14.8087	-1.7584	14.8087	-1.51785	14.8085	0.33215	14.8083	-1.66735	14.8085	-1.6634	14.8083	-1.618
14.8167	-1.38895	14.817	-1.47535	14.817	-1.75745	14.817	-1.51465	14.8168	0.3311	14.8167	-1.6672	14.8168	-1.66065	14.8167	-1.61745
14.825	-1.3875	14.8253	-1.4772	14.8253	-1.7561	14.8253	-1.51035	14.8252	0.3294	14.825	-1.6677	14.8252	-1.65575	14.825	-1.61565
14.8333	-1.38775	14.8337	-1.47825	14.8337	-1.75745	14.8337	-1.50615	14.8335	0.3291	14.8333	-1.6689	14.8335	-1.6522	14.8333	-1.6164
14.8417	-1.3865	14.842	-1.47955	14.842	-1.7592	14.842	-1.50015	14.8418	0.3276	14.8417	-1.6693	14.8418	-1.6476	14.8417	-1.61425
14.85	-1.38805	14.8503	-1.4787	14.8503	-1.7574	14.8503	-1.49315	14.8502	0.3267	14.85	-1.66715	14.8502	-1.6411	14.85	-1.61125
14.8583	-1.38775	14.8587	-1.48115	14.8587	-1.7572	14.8587	-1.48695	14.8585	0.3249	14.8583	-1.6678	14.8585	-1.6376	14.8583	-1.6085
14.8667	-1.3899	14.867	-1.48195	14.867	-1.7578	14.867	-1.48115	14.8668	0.32365	14.8667	-1.66915	14.8668	-1.6324	14.8667	-1.60625
14.875	-1.39115	14.8753	-1.4802	14.8753	-1.759	14.8753	-1.47415	14.8752	0.323	14.875	-1.66825	14.8752	-1.62895	14.875	-1.6038
14.8833	-1.3887	14.8837	-1.4779	14.8837	-1.7583	14.8837	-1.46545	14.8835	0.32305	14.8833	-1.66855	14.8835	-1.6212	14.8833	-1.5986
14.8917	-1.39285	14.892	-1.4782	14.892	-1.7583	14.892	-1.4622	14.8918	0.3194	14.8917	-1.6703	14.8918	-1.6177	14.8917	-1.59425
14.9	-1.3893	14.9003	-1.4731	14.9003	-1.7558	14.9003	-1.4536	14.9002	0.31645	14.9	-1.66645	14.9002	-1.6106	14.9	-1.58885
14.9083	-1.3878	14.9087	-1.46725	14.9087	-1.75415	14.9087	-1.4455	14.9085	0.316	14.9083	-1.66505	14.9085	-1.6055	14.9083	-1.5806
14.9167	-1.38785	14.917	-1.4653	14.917	-1.7543	14.917	-1.43875	14.9168	0.31585	14.9167	-1.66535	14.9168	-1.5998	14.9167	-1.57515
14.925	-1.38845	14.9253	-1.4632	14.9253	-1.75485	14.9253	-1.4337	14.9252	0.3144	14.925	-1.6657	14.9252	-1.59715	14.925	-1.56865
14.9333	-1.39085	14.9337	-1.4594	14.9337	-1.7534	14.9337	-1.4297	14.9335	0.3139	14.9333	-1.6659	14.9335	-1.59345	14.9333	-1.56545
14.9417	-1.39125	14.942	-1.4547	14.942	-1.75015	14.942	-1.42575	14.9418	0.3124	14.9417	-1.66425	14.9418	-1.58905	14.9417	-1.5592
14.95	-1.38915	14.9503	-1.45035	14.9503	-1.74715	14.9503	-1.41835	14.9502	0.3116	14.95	-1.66305	14.9502	-1.58645	14.95	-1.55355
14.9583	-1.38995	14.9587	-1.44765	14.9587	-1.74615	14.9587	-1.41675	14.9585	0.3114	14.9583	-1.6627	14.9585	-1.58705	14.9583	-1.54665
14.9667	-1.39	14.967	-1.4429	14.967	-1.7434	14.967	-1.4144	14.9668	0.3111	14.9667	-1.66065	14.9668	-1.5848	14.9667	-1.54125
14.975	-1.39085	14.9753	-1.44045	14.9753	-1.7412	14.9753	-1.4143	14.9752	0.31165	14.975	-1.66095	14.9752	-1.58475	14.975	-1.5386
14.9833	-1.39045	14.9837	-1.43395	14.9837	-1.7378	14.9837	-1.41125	14.9835	0.30955	14.9833	-1.65675	14.9835	-1.5842	14.9833	-1.53125
14.9917	-1.3922	14.992	-1.42935	14.992	-1.73185	14.992	-1.4089	14.9918	0.3089	14.9917	-1.6533	14.9918	-1.5855	14.9917	-1.5274
15	-1.3905	15.0003	-1.4253	15.0003	-1.7269	15.0003	-1.4076	15.0002	0.3078	15	-1.65135	15.0002	-1.58495	15	-1.5249
15.0083	-1.39105	15.0087	-1.42225	15.0087	-1.72355	15.0087	-1.40645	15.0085	0.3083	15.0083	-1.6452	15.0085	-1.5848	15.0083	-1.52095
15.0167	-1.393	15.017	-1.4194	15.017	-1.722	15.017	-1.40885	15.0168	0.30795	15.0167	-1.6451	15.0168	-1.5878	15.0167	-1.5181
15.025	-1.39295	15.0253	-1.4178	15.0253	-1.7176	15.0253	-1.40755	15.0252	0.30895	15.025	-1.6397	15.0252	-1.58955	15.025	-1.5153
15.0333	-1.3955	15.0337	-1.4167	15.0337	-1.71545	15.0337	-1.4106	15.0335	0.3098	15.0333	-1.6399	15.0335	-1.5955	15.0333	-1.51775
15.0417	-1.39665	15.042	-1.41445	15.042	-1.71255	15.042	-1.41005	15.0418	0.3065	15.0417	-1.63445	15.0418	-1.5932	15.0417	-1.51465
15.05	-1.3947	15.0503	-1.40995	15.0503	-1.7068	15.0503	-1.40545	15.0502	0.3071	15.05	-1.62725	15.0502	-1.59345	15.05	-1.50985
15.0583	-1.3951	15.0587	-1.40945	15.0587	-1.70395	15.0587	-1.4016	15.0585	0.30765	15.0583	-1.6206	15.0585	-1.5915	15.0583	-1.50855
15.0667	-1.39345	15.067	-1.40625	15.067	-1.69735	15.067	-1.3979	15.0668	0.30805	15.0667	-1.61615	15.0668	-1.5906	15.0667	-1.5031
15.075	-1.393	15.0753	-1.39945	15.0753	-1.6937	15.0753	-1.3906	15.0752	0.3063	15.075	-1.60875	15.0752	-1.5857	15.075	-1.49775
15.0833	-1.39155	15.0837	-1.39345	15.0837	-1.68885	15.0837	-1.37845	15.0835	0.3061	15.0833	-1.6015	15.0835	-1.5799	15.0833	-1.4904
15.0917	-1.3925	15.092	-1.3838	15.092	-1.68525	15.092	-1.36155	15.0918	0.30835	15.0917	-1.59405	15.0918	-1.57145	15.0917	-1.4803
15.1	-1.3951	15.1003	-1.37505	15.1003	-1.68145	15.1003	-1.34175	15.1002	0.30775	15.1	-1.58705	15.1002	-1.56085	15.1	-1.4671
15.1083	-1.3926	15.1087	-1.35995	15.1087	-1.67335	15.1087	-1.30575	15.1085	0.30825	15.1083	-1.57625	15.1085	-1.54035	15.1083	-1.44425
15.1167	-1.3914	15.117	-1.3363	15.117	-1.66635	15.117	-1.26245	15.1168	0.30975	15.1167	-1.5644	15.1168	-1.5161	15.1167	-1.41525
15.125	-1.3898	15.1253	-1.30955	15.1253	-1.65495	15.1253	-1.20575	15.1252	0.31185	15.125	-1.5504	15.1252	-1.484	15.125	-1.3808
15.1333	-1.38815	15.1337	-1.27335	15.1337	-1.6421	15.1337	-1.1344	15.1335	0.313	15.1333	-1.53245	15.1335	-1.44325	15.1333	-1.33585
15.1417	-1.3856	15.142	-1.22665	15.142	-1.62355	15.142	-1.04415	15.1418	0.31425	15.1417	-1.50925	15.1418	-1.3923	15.1417	-1.27625
15.15	-1.3834	15.1503	-1.16715	15.1503	-1.60385	15.1503	-0.92895	15.1502	0.3182	15.15	-1.4829	15.1502	-1.3273	15.15	-1.1973
15.1583	-1.38005	15.1587	-1.09085	15.1587	-1.57465	15.1587	-0.78785	15.1585	0.32305	15.1583	-1.44875	15.1585	-1.249	15.1583	-1.10285
15.1667	-1.37345	15.167	-0.99345	15.167	-1.53885	15.167	-0.6143	15.1668	0.3241	15.1667	-1.40285	15.1668	-1.15095	15.1667	-0.98475
15.175	-1.36675	15.1753	-0.87715	15.1753	-1.49225	15.1753	-0.40425	15.1752	0.32895	15.175	-1.35025	15.1752	-1.03385	15.175	-0.8402
15.1833	-1.35755	15.1837	-0.73375	15.1837	-1.4361	15.1837	-0.15705	15.1835	0.33005	15.1833	-1.28305	15.1835	-0.8948	15.1833	-0.6635
15.1917	-1.34645	15.192	-0.56125	15.192	-1.36485	15.192	0.13275	15.1918	0.336	15.1917	-1.1995	15.1918	-0.7329	15.1917	-0.4556
15.2	-1.33265	15.2003	-0.35915	15.2003	-1.27915	15.2003	0.46635	15.2002	0.3425	15.2	-1.09735	15.2002	-0.5454	15.2	-0.21225
15.2083	-1.3149	15.2087	-0.12505	15.2087	-1.17785	15.2087	0.8397	15.2085	0.34875	15.2083	-0.9767	15.2085	-0.33305	15.2083	0.0671
15.2167	-1.2981	15.217	0.1404	15.217	-1.0616	15.217	1.25265	15.2168	0.35775	15.2167	-0.83845	15.2168	-0.098	15.2167	0.3832
15.225	-1.27515	15.2253	0.4379	15.2253	-0.9231	15.2253	1.7037	15.2252	0.3611	15.225	-0.67285	15.2252	0.1604	15.225	0.7352
15.2333	-1.2469	15.2337	0.7671	15.2337	-0.76665	15.2337	2.18645	15.2335	0.3687	15.2333	-0.48235	15.2335	0.4428	15.2333	1.12585
15.2417	-1.2136	15.242	1.12565	15.242	-0.59225	15.242	2.6931	15.2418	0.37535	15.2417	-0.26815	15.2418	0.74185	15.2417	1.54595
15.25	-1.17965	15.2503	1.50305	15.2503	-0.4028	15.2503	3.20835	15.2502	0.38425	15.25	-0.0337	15.2502	1.05175	15.25	1.98335
15.2583	-1.13975	15.2587	1.893	15.2587	-0.19875	15.2587	3.7211	15.2585	0.39085	15.2583	0.217	15.2585	1.3679	15.2583	2.43715
15.2667	-1.09765	15.267	2.293	15.267	0.0132	15.267	4.222	15.2668	0.39865	15.2667	0.4857	15.2668	1.6839	15.2667	2.8978
15.275	-1.05075	15.2753	2.6935	15.2753	0.2328	15.2753	4.69925	15.2752	0.40725	15.275	0.7644	15.2752	1.99545	15.275	3.3527
15.2833	-0.9994	15.2837	3.0843	15.2837	0.4565	15.2837	5.14495	15.2835	0.41805	15.2833	1.046	15.2835	2.29075	15.2833	3.79565
15.2917	-0.94935	15.292	3.45315	15.292	0.6717	15.292	5.5397	15.2918	0.4265	15.2917	1.3259	15.2918	2.5653	15.2917	4.2136
15.3	-0.9	15.3003	3.79375	15.3003	0.87465	15.3003	5.8732	15.3002	0.43965	15.3	1.59315	15.3002	2.8123	15.3	4.5983
15.3083	-0.8499	15.3087	4.0992	15.3087	1.06245	15.3087	6.14065	15.3085	0.45535	15.3083	1.84165	15.3085	3.0254	15.3083	4.9369
15.3167	-0.8039	15.317	4.3608	15.317	1.22945	15.317	6.3398	15.3168	0.47125	15.3167	2.0653	15.3168	3.19785	15.3167	5.223
15.325	-0.75805	15.3253	4.57435	15.3253	1.37325	15.3253	6.46395	15.3252	0.4921	15.325	2.25735	15.3252	3.32915	15.325	5.4526
15.3333	-0.7149	15.3337	4.73355	15.3337	1.48795	15.3337	6.51345	15.3335	0.5187	15.3333	2.41495	15.3335	3.4171	15.3333	5.61835
15.3417	-0.6822	15.342	4.8364	15.342	1.568	15.342	6.48735	15.3418	0.5507	15.3417	2.5294	15.3418	3.4553	15.3417	5.717
15.35	-0.6555	15.3503	4.8788	15.3503	1.6139	15.3503	6.38875	15.3502	0.58835	15.35	2.5989	15.3502	3.44535	15.35	5.74545
15.3583	-0.63515	15.3587	4.8661	15.3587	1.6281	15.3587	6.22385	15.3585	0.63615	15.3583	2.62635	15.3585	3.39305	15.3583	5.71335
15.3667	-0.6213	15.367	4.79845	15.367	1.61125	15.367	5.9963	15.3668	0.6945	15.3667	2.6109	15.3668	3.2965	15.3667	5.6146
15.375	-0.6143	15.3753	4.67685	15.3753	1.5603	15.3753	5.71425	15.3752	0.76645	15.375	2.5539	15.3752	3.16295	15.375	5.45955
15.3833	-0.61455	15.3837	4.51265	15.3837	1.48025	15.3837	5.39055	15.3835	0.8509	15.3833	2.46065	15.3835	2.99625	15.3833	5.25275
15.3917	-0.6239	15.392	4.30275	15.392	1.37505	15.392	5.02805	15.3918	0.95705	15.3917	2.3328	15.3918	2.8005	15.3917	4.99585
15.4	-0.63995	15.4003	4.0601	15.4003	1.24775	15.4003	4.639	15.4002	1.0817	15.4	2.1718	15.4002	2.57825	15.4	4.70335
15.4083	-0.6638	15.4087	3.7846	15.4087	1.09885	15.4087	4.2314	15.4085	1.22665	15.4083	1.98525	15.4085	2.33735	15.4083	4.3778
15.4167	-0.6927	15.417	3.4874	15.417	0.93505	15.417	3.81595	15.4168	1.3941	15.4167	1.77945	15.4168	2.0842	15.4167	4.0291
15.425	-0.72695	15.4253	3.17435	15.4253	0.76315	15.4253	3.39695	15.4252	1.58315	15.425	1.5612	15.4252	1.8234	15.425	3.66715
15.4333	-0.75995	15.4337	2.85205	15.4337	0.58645	15.4337	2.9871	15.4335	1.79865	15.4333	1.3355	15.4335	1.56145	15.4333	3.29745
15.4417	-0.80415	15.442	2.5232	15.442	0.40475	15.442	2.5845	15.4418	2.0362	15.4417	1.10465	15.4418	1.29825	15.4417	2.9215
15.45	-0.846	15.4503	2.1983	15.4503	0.22465	15.4503	2.2001	15.4502	2.2954	15.45	0.87515	15.4502	1.0418	15.45	2.55135
15.4583	-0.88565	15.4587	1.88115	15.4587	0.04955	15.4587	1.83605	15.4585	2.57355	15.4583	0.6511	15.4585	0.79285	15.4583	2.1937
15.4667	-0.9272	15.467	1.57545	15.467	-0.1188	15.467	1.4973	15.4668	2.8663	15.4667	0.434	15.4668	0.5571	15.4667	1.84935
15.475	-0.97195	15.4753	1.27995	15.4753	-0.2838	15.4753	1.1794	15.4752	3.1703	15.475	0.2231	15.4752	0.33055	15.475	1.51785
15.4833	-1.01135	15.4837	1.0081	15.4837	-0.4349	15.4837	0.89125	15.4835	3.4787	15.4833	0.0274	15.4835	0.12215	15.4833	1.2111
15.4917	-1.05295	15.492	0.7506	15.492	-0.57625	15.492	0.6251	15.4918	3.7862	15.4917	-0.15565	15.4918	-0.0735	15.4917	0.92185
15.5	-1.0865	15.5003	0.51375	15.5003	-0.7047	15.5003	0.3881	15.5002	4.0888	15.5	-0.32115	15.5002	-0.24855	15.5	0.66
15.5083	-1.12005	15.5087	0.2971	15.5087	-0.82265	15.5087	0.174	15.5085	4.3728	15.5083	-0.473	15.5085	-0.4087	15.5083	0.41415
15.5167	-1.1515	15.517	0.10065	15.517	-0.92685	15.517	-0.01765	15.5168	4.63665	15.5167	-0.61195	15.5168	-0.55345	15.5167	0.1945
15.525	-1.1777	15.5253	-0.0762	15.5253	-1.02335	15.5253	-0.1833	15.5252	4.8766	15.525	-0.73485	15.5252	-0.6817	15.525	-0.005
15.5333	-1.20625	15.5337	-0.2353	15.5337	-1.1096	15.5337	-0.33285	15.5335	5.0843	15.5333	-0.84465	15.5335	-0.79895	15.5333	-0.18375
15.5417	-1.22735	15.542	-0.3754	15.542	-1.183	15.542	-0.4638	15.5418	5.2542	15.5417	-0.94315	15.5418	-0.89955	15.5417	-0.3405
15.55	-1.24835	15.5503	-0.49895	15.5503	-1.2478	15.5503	-0.574	15.5502	5.3782	15.55	-1.026	15.5502	-0.9876	15.55	-0.4788
15.5583	-1.2655	15.5587	-0.6065	15.5587	-1.30465	15.5587	-0.67185	15.5585	5.46525	15.5583	-1.09935	15.5585	-1.06355	15.5583	-0.60175
15.5667	-1.2846	15.567	-0.70325	15.567	-1.3535	15.567	-0.7581	15.5668	5.5028	15.5667	-1.16305	15.5668	-1.1323	15.5667	-0.7082
15.575	-1.2988	15.5753	-0.7876	15.5753	-1.3984	15.5753	-0.8314	15.5752	5.49705	15.575	-1.2231	15.5752	-1.19085	15.575	-0.8032
15.5833	-1.3139	15.5837	-0.8637	15.5837	-1.4384	15.5837	-0.89865	15.5835	5.44915	15.5833	-1.27335	15.5835	-1.24395	15.5833	-0.8878
15.5917	-1.32135	15.592	-0.92435	15.592	-1.4692	15.592	-0.953	15.5918	5.36095	15.5917	-1.31285	15.5918	-1.2842	15.5917	-0.95605
15.6	-1.3322	15.6003	-0.97955	15.6003	-1.49835	15.6003	-0.9993	15.6002	5.23285	15.6	-1.34845	15.6002	-1.3243	15.6	-1.01705
15.6083	-1.3365	15.6087	-1.02565	15.6087	-1.51805	15.6087	-1.03755	15.6085	5.06845	15.6083	-1.37715	15.6085	-1.3543	15.6083	-1.0667
15.6167	-1.34505	15.617	-1.06685	15.617	-1.5392	15.617	-1.0736	15.6168	4.87395	15.6167	-1.40415	15.6168	-1.38365	15.6167	-1.1155
15.625	-1.34985	15.6253	-1.10315	15.6253	-1.55945	15.6253	-1.1033	15.6252	4.6562	15.625	-1.42705	15.6252	-1.40865	15.625	-1.1548
15.6333	-1.35785	15.6337	-1.13945	15.6337	-1.5759	15.6337	-1.1312	15.6335	4.41855	15.6333	-1.4498	15.6335	-1.4327	15.6333	-1.19195
15.6417	-1.362	15.642	-1.1651	15.642	-1.5902	15.642	-1.1553	15.6418	4.16935	15.6417	-1.46655	15.6418	-1.45095	15.6417	-1.21925
15.65	-1.36455	15.6503	-1.18765	15.6503	-1.602	15.6503	-1.17345	15.6502	3.911	15.65	-1.4805	15.6502	-1.46435	15.65	-1.2439
15.6583	-1.3667	15.6587	-1.2088	15.6587	-1.6129	15.6587	-1.19105	15.6585	3.6476	15.6583	-1.4935	15.6585	-1.47835	15.6583	-1.26745
15.6667	-1.36955	15.667	-1.22475	15.667	-1.6218	15.667	-1.20485	15.6668	3.38545	15.6667	-1.50295	15.6668	-1.49125	15.6667	-1.28625
15.675	-1.37355	15.6753	-1.24	15.6753	-1.62895	15.6753	-1.2177	15.6752	3.1295	15.675	-1.5128	15.6752	-1.50095	15.675	-1.3028
15.6833	-1.3741	15.6837	-1.2535	15.6837	-1.63615	15.6837	-1.22835	15.6835	2.88295	15.6833	-1.51925	15.6835	-1.5098	15.6833	-1.3185
15.6917	-1.37295	15.692	-1.2644	15.692	-1.64005	15.692	-1.2347	15.6918	2.64825	15.6917	-1.52605	15.6918	-1.5159	15.6917	-1.3286
15.7	-1.3767	15.7003	-1.27455	15.7003	-1.64495	15.7003	-1.24305	15.7002	2.4232	15.7	-1.5328	15.7002	-1.52295	15.7	-1.34175
15.7083	-1.3799	15.7087	-1.2821	15.7087	-1.64965	15.7087	-1.2488	15.7085	2.216	15.7083	-1.537	15.7085	-1.52795	15.7083	-1.3491
15.7167	-1.3812	15.717	-1.29105	15.717	-1.6542	15.717	-1.25285	15.7168	2.02905	15.7167	-1.5422	15.7168	-1.53005	15.7167	-1.3578
15.725	-1.38445	15.7253	-1.2989	15.7253	-1.65985	15.7253	-1.2576	15.7252	1.8525	15.725	-1.5487	15.7252	-1.5376	15.725	-1.36615
15.7333	-1.3832	15.7337	-1.30105	15.7337	-1.6611	15.7337	-1.25585	15.7335	1.69285	15.7333	-1.55075	15.7335	-1.5374	15.7333	-1.36985
15.7417	-1.38525	15.742	-1.307	15.742	-1.6636	15.742	-1.2581	15.7418	1.54765	15.7417	-1.55215	15.7418	-1.541	15.7417	-1.3727
15.75	-1.3873	15.7503	-1.30985	15.7503	-1.6656	15.7503	-1.25965	15.7502	1.42315	15.75	-1.55665	15.7502	-1.54345	15.75	-1.3786
15.7583	-1.38715	15.7587	-1.3107	15.7587	-1.66635	15.7587	-1.25675	15.7585	1.31085	15.7583	-1.55485	15.7585	-1.5427	15.7583	-1.3787
15.7667	-1.3895	15.767	-1.3121	15.767	-1.66665	15.767	-1.25615	15.7668	1.2109	15.7667	-1.5564	15.7668	-1.5429	15.7667	-1.3793
15.775	-1.3903	15.7753	-1.31395	15.7753	-1.6672	15.7753	-1.25535	15.7752	1.123	15.775	-1.5572	15.7752	-1.54335	15.775	-1.38005
15.7833	-1.3923	15.7837	-1.3137	15.7837	-1.66605	15.7837	-1.25395	15.7835	1.0452	15.7833	-1.55715	15.7835	-1.54415	15.7833	-1.38045
15.7917	-1.3926	15.792	-1.31355	15.792	-1.6671	15.792	-1.25005	15.7918	0.9782	15.7917	-1.55455	15.7918	-1.5433	15.7917	-1.37945
15.8	-1.3936	15.8003	-1.3113	15.8003	-1.66465	15.8003	-1.247	15.8002	0.9181	15.8	-1.5542	15.8002	-1.54175	15.8	-1.3777
15.8083	-1.3946	15.8087	-1.3087	15.8087	-1.66425	15.8087	-1.2437	15.8085	0.86825	15.8083	-1.5497	15.8085	-1.5409	15.8083	-1.3748
15.8167	-1.3929	15.817	-1.3076	15.817	-1.6633	15.817	-1.2435	15.8168	0.8216	15.8167	-1.5451	15.8168	-1.5381	15.8167	-1.3729
15.825	-1.39635	15.8253	-1.30875	15.8253	-1.66265	15.8253	-1.24295	15.8252	0.7833	15.825	-1.5432	15.8252	-1.5394	15.825	-1.3744
15.8333	-1.3964	15.8337	-1.30605	15.8337	-1.66005	15.8337	-1.23985	15.8335	0.74915	15.8333	-1.5385	15.8335	-1.53885	15.8333	-1.3721
15.8417	-1.3946	15.842	-1.3039	15.842	-1.65975	15.842	-1.23685	15.8418	0.7196	15.8417	-1.5337	15.8418	-1.53745	15.8417	-1.36925
15.85	-1.396	15.8503	-1.30275	15.8503	-1.65665	15.8503	-1.2337	15.8502	0.69395	15.85	-1.52895	15.8502	-1.53535	15.85	-1.36505
15.8583	-1.39555	15.8587	-1.3019	15.8587	-1.65535	15.8587	-1.23435	15.8585	0.6698	15.8583	-1.5225	15.8585	-1.5331	15.8583	-1.3645
15.8667	-1.3978	15.867	-1.30015	15.867	-1.65625	15.867	-1.2356	15.8668	0.6505	15.8667	-1.51875	15.8668	-1.5342	15.8667	-1.3645
15.875	-1.3972	15.8753	-1.29975	15.8753	-1.65355	15.8753	-1.23445	15.8752	0.63015	15.875	-1.51075	15.8752	-1.5313	15.875	-1.36155
15.8833	-1.3973	15.8837	-1.2981	15.8837	-1.65255	15.8837	-1.23515	15.8835	0.61495	15.8833	-1.50445	15.8835	-1.5312	15.8833	-1.3601
15.8917	-1.3993	15.892	-1.3	15.892	-1.6521	15.892	-1.23835	15.8918	0.59845	15.8917	-1.49995	15.8918	-1.5327	15.8917	-1.3619
15.9	-1.39785	15.9003	-1.30105	15.9003	-1.6539	15.9003	-1.23995	15.9002	0.58725	15.9	-1.49345	15.9002	-1.53225	15.9	-1.35955
15.9083	-1.39885	15.9087	-1.302	15.9087	-1.65385	15.9087	-1.24375	15.9085	0.5763	15.9083	-1.4881	15.9085	-1.5334	15.9083	-1.36195
15.9167	-1.3965	15.917	-1.3034	15.917	-1.65345	15.917	-1.2475	15.9168	0.5663	15.9167	-1.48265	15.9168	-1.5339	15.9167	-1.36165
15.925	-1.39465	15.9253	-1.3065	15.9253	-1.65235	15.9253	-1.25115	15.9252	0.55435	15.925	-1.478	15.9252	-1.5351	15.925	-1.363
15.9333	-1.3985	15.9337	-1.31185	15.9337	-1.6571	15.9337	-1.25875	15.9335	0.5473	15.9333	-1.4745	15.9335	-1.53895	15.9333	-1.3658
15.9417	-1.3971	15.942	-1.31475	15.942	-1.65805	15.942	-1.26495	15.9418	0.5398	15.9417	-1.47115	15.9418	-1.53955	15.9417	-1.3698
15.95	-1.3992	15.9503	-1.3198	15.9503	-1.6626	15.9503	-1.27165	15.9502	0.5324	15.95	-1.47135	15.9502	-1.5432	15.95	-1.37305
15.9583	-1.399	15.9587	-1.32385	15.9587	-1.6636	15.9587	-1.27885	15.9585	0.527	15.9583	-1.4698	15.9585	-1.54515	15.9583	-1.3774
15.9667	-1.39945	15.967	-1.3288	15.967	-1.6673	15.967	-1.28685	15.9668	0.5231	15.9667	-1.4667	15.9668	-1.54655	15.9667	-1.37985
15.975	-1.3981	15.9753	-1.33215	15.9753	-1.66865	15.9753	-1.2943	15.9752	0.5178	15.975	-1.4642	15.9752	-1.54925	15.975	-1.38425
15.9833	-1.39965	15.9837	-1.34305	15.9837	-1.67645	15.9837	-1.304	15.9835	0.51505	15.9833	-1.4702	15.9835	-1.55605	15.9833	-1.39295
15.9917	-1.4012	15.992	-1.34865	15.992	-1.68005	15.992	-1.31295	15.9918	0.51365	15.9917	-1.47195	15.9918	-1.55865	15.9917	-1.39825
16	-1.4018	16.0003	-1.356	16.0003	-1.68255	16.0003	-1.32215	16.0002	0.5098	16	-1.4723	16.0002	-1.56275	16	-1.40525
16.0083	-1.40115	16.0087	-1.363	16.0087	-1.68725	16.0087	-1.3321	16.0085	0.5099	16.0083	-1.47625	16.0085	-1.5676	16.0083	-1.41085
16.0167	-1.4027	16.017	-1.37125	16.017	-1.6941	16.017	-1.34265	16.0168	0.50885	16.0167	-1.48395	16.0168	-1.5731	16.0167	-1.4196
16.025	-1.4045	16.0253	-1.3798	16.0253	-1.69945	16.0253	-1.35415	16.0252	0.50875	16.025	-1.49045	16.0252	-1.57925	16.025	-1.4284
16.0333	-1.40375	16.0337	-1.3858	16.0337	-1.7002	16.0337	-1.36205	16.0335	0.50795	16.0333	-1.49605	16.0335	-1.58125	16.0333	-1.43475
16.0417	-1.40315	16.042	-1.3929	16.042	-1.7049	16.042	-1.37115	16.0418	0.51135	16.0417	-1.5035	16.0418	-1.58755	16.0417	-1.44495
16.05	-1.4043	16.0503	-1.3985	16.0503	-1.70935	16.0503	-1.3817	16.0502	0.51095	16.05	-1.51285	16.0502	-1.593	16.05	-1.45195
16.0583	-1.40475	16.0587	-1.40495	16.0587	-1.71245	16.0587	-1.3882	16.0585	0.51565	16.0583	-1.5201	16.0585	-1.59885	16.0583	-1.458
16.0667	-1.40755	16.067	-1.4131	16.067	-1.71705	16.067	-1.39745	16.0668	0.5143	16.0667	-1.53015	16.0668	-1.60485	16.0667	-1.46605
16.075	-1.4053	16.0753	-1.41945	16.0753	-1.71815	16.0753	-1.40465	16.0752	0.51665	16.075	-1.53685	16.0752	-1.60975	16.075	-1.4749
16.0833	-1.40505	16.0837	-1.42305	16.0837	-1.72335	16.0837	-1.41105	16.0835	0.51835	16.0833	-1.54555	16.0835	-1.6135	16.0833	-1.4813
16.0917	-1.4066	16.092	-1.4289	16.092	-1.7268	16.092	-1.4177	16.0918	0.523	16.0917	-1.5534	16.0918	-1.61855	16.0917	-1.4877
16.1	-1.40525	16.1003	-1.4356	16.1003	-1.72745	16.1003	-1.4234	16.1002	0.52375	16.1	-1.5617	16.1002	-1.6226	16.1	-1.49315
16.1083	-1.40685	16.1087	-1.44015	16.1087	-1.72905	16.1087	-1.4299	16.1085	0.5248	16.1083	-1.5696	16.1085	-1.6265	16.1083	-1.49965
16.1167	-1.40735	16.117	-1.4433	16.117	-1.7327	16.117	-1.4373	16.1168	0.5271	16.1167	-1.5762	16.1168	-1.63	16.1167	-1.5048
16.125	-1.40905	16.1253	-1.4479	16.1253	-1.73565	16.1253	-1.4412	16.1252	0.52895	16.125	-1.58535	16.1252	-1.63465	16.125	-1.5113
16.1333	-1.4082	16.1337	-1.44985	16.1337	-1.73475	16.1337	-1.44445	16.1335	0.5313	16.1333	-1.58925	16.1335	-1.638	16.1333	-1.51515
16.1417	-1.41035	16.142	-1.4547	16.142	-1.73755	16.142	-1.4497	16.1418	0.53185	16.1417	-1.5965	16.1418	-1.64225	16.1417	-1.52335
16.15	-1.40935	16.1503	-1.4571	16.1503	-1.7387	16.1503	-1.4529	16.1502	0.5319	16.15	-1.6023	16.1502	-1.64675	16.15	-1.52365
16.1583	-1.40825	16.1587	-1.46015	16.1587	-1.74015	16.1587	-1.4549	16.1585	0.53285	16.1583	-1.6049	16.1585	-1.64735	16.1583	-1.5283
16.1667	-1.4099	16.167	-1.46265	16.167	-1.74245	16.167	-1.45885	16.1668	0.533	16.1667	-1.6116	16.1668	-1.6509	16.1667	-1.5307
16.175	-1.41225	16.1753	-1.46745	16.1753	-1.7463	16.1753	-1.4626	16.1752	0.5279	16.175	-1.6151	16.1752	-1.6529	16.175	-1.53715
16.1833	-1.41045	16.1837	-1.46715	16.1837	-1.74605	16.1837	-1.4666	16.1835	0.52705	16.1833	-1.6181	16.1835	-1.65525	16.1833	-1.5395
16.1917	-1.4116	16.192	-1.4697	16.192	-1.7477	16.192	-1.4692	16.1918	0.52585	16.1917	-1.62235	16.1918	-1.6577	16.1917	-1.543
16.2	-1.41215	16.2003	-1.4719	16.2003	-1.75035	16.2003	-1.47555	16.2002	0.5227	16.2	-1.626	16.2002	-1.66255	16.2	-1.54695
16.2083	-1.4102	16.2087	-1.4707	16.2087	-1.74695	16.2087	-1.4731	16.2085	0.5193	16.2083	-1.6254	16.2085	-1.6622	16.2083	-1.5472
16.2167	-1.4121	16.217	-1.47365	16.217	-1.74825	16.217	-1.47705	16.2168	0.5163	16.2167	-1.6293	16.2168	-1.66325	16.2167	-1.5488
16.225	-1.41145	16.2253	-1.47425	16.2253	-1.75135	16.2253	-1.47865	16.2252	0.51345	16.225	-1.63185	16.2252	-1.6671	16.225	-1.5504
16.2333	-1.4093	16.2337	-1.4753	16.2337	-1.75085	16.2337	-1.4793	16.2335	0.50695	16.2333	-1.63265	16.2335	-1.6633	16.2333	-1.55125
16.2417	-1.40885	16.242	-1.47455	16.242	-1.7497	16.242	-1.4788	16.2418	0.50295	16.2417	-1.6323	16.2418	-1.66275	16.2417	-1.55015
16.25	-1.40965	16.2503	-1.4776	16.2503	-1.75125	16.2503	-1.4802	16.2502	0.4969	16.25	-1.63415	16.2502	-1.66505	16.25	-1.5526
16.2583	-1.4088	16.2587	-1.47915	16.2587	-1.75125	16.2587	-1.48295	16.2585	0.49225	16.2583	-1.6359	16.2585	-1.66575	16.2583	-1.5523
16.2667	-1.40825	16.267	-1.47715	16.267	-1.75125	16.267	-1.4843	16.2668	0.4877	16.2667	-1.63435	16.2668	-1.6653	16.2667	-1.5529
16.275	-1.4095	16.2753	-1.4789	16.2753	-1.7509	16.2753	-1.4842	16.2752	0.4827	16.275	-1.6349	16.2752	-1.66455	16.275	-1.55575
16.2833	-1.4064	16.2837	-1.47705	16.2837	-1.7511	16.2837	-1.4835	16.2835	0.47725	16.2833	-1.6353	16.2835	-1.66525	16.2833	-1.55495
16.2917	-1.4038	16.292	-1.4782	16.292	-1.7501	16.292	-1.484	16.2918	0.4712	16.2917	-1.63475	16.2918	-1.6654	16.2917	-1.5539
16.3	-1.40225	16.3003	-1.4776	16.3003	-1.7497	16.3003	-1.4808	16.3002	0.4647	16.3	-1.6332	16.3002	-1.66545	16.3	-1.553
16.3083	-1.4007	16.3087	-1.4765	16.3087	-1.74795	16.3087	-1.48185	16.3085	0.4587	16.3083	-1.63275	16.3085	-1.66665	16.3083	-1.5532
16.3167	-1.4018	16.317	-1.48	16.317	-1.75055	16.317	-1.48125	16.3168	0.45415	16.3167	-1.63355	16.3168	-1.667	16.3167	-1.55475
16.325	-1.39905	16.3253	-1.47825	16.3253	-1.74835	16.3253	-1.4806	16.3252	0.4499	16.325	-1.6349	16.3252	-1.6674	16.325	-1.55265
16.3333	-1.3963	16.3337	-1.47935	16.3337	-1.7467	16.3337	-1.48135	16.3335	0.4438	16.3333	-1.63225	16.3335	-1.66465	16.3333	-1.55375
16.3417	-1.3947	16.342	-1.479	16.342	-1.74785	16.342	-1.48295	16.3418	0.4394	16.3417	-1.6309	16.3418	-1.66425	16.3417	-1.554
16.35	-1.39595	16.3503	-1.48065	16.3503	-1.74825	16.3503	-1.48325	16.3502	0.43725	16.35	-1.6332	16.3502	-1.6656	16.35	-1.555
16.3583	-1.3935	16.3587	-1.48055	16.3587	-1.7486	16.3587	-1.4845	16.3585	0.4325	16.3583	-1.63245	16.3585	-1.6664	16.3583	-1.5544
16.3667	-1.3906	16.367	-1.4785	16.367	-1.7471	16.367	-1.48385	16.3668	0.4295	16.3667	-1.6315	16.3668	-1.6653	16.3667	-1.55485
16.375	-1.39035	16.3753	-1.47845	16.3753	-1.74655	16.3753	-1.48465	16.3752	0.4241	16.375	-1.63085	16.3752	-1.66445	16.375	-1.55465
16.3833	-1.388	16.3837	-1.4791	16.3837	-1.7459	16.3837	-1.4861	16.3835	0.42325	16.3833	-1.6297	16.3835	-1.66545	16.3833	-1.555
16.3917	-1.3898	16.392	-1.47925	16.392	-1.7464	16.392	-1.48785	16.3918	0.4189	16.3917	-1.63135	16.3918	-1.66745	16.3917	-1.55535
16.4	-1.38945	16.4003	-1.48265	16.4003	-1.7462	16.4003	-1.49055	16.4002	0.41565	16.4	-1.6317	16.4002	-1.6676	16.4	-1.5566
16.4083	-1.38885	16.4087	-1.4823	16.4087	-1.748	16.4087	-1.49085	16.4085	0.41385	16.4083	-1.6306	16.4085	-1.6693	16.4083	-1.55765
16.4167	-1.38855	16.417	-1.4859	16.417	-1.7481	16.417	-1.4953	16.4168	0.4102	16.4167	-1.63205	16.4168	-1.67035	16.4167	-1.559
16.425	-1.38305	16.4253	-1.483	16.4253	-1.7453	16.4253	-1.4931	16.4252	0.4088	16.425	-1.631	16.4252	-1.66905	16.425	-1.55645
16.4333	-1.3839	16.4337	-1.4823	16.4337	-1.7462	16.4337	-1.4954	16.4335	0.40715	16.4333	-1.6297	16.4335	-1.6699	16.4333	-1.55805
16.4417	-1.38445	16.442	-1.48425	16.442	-1.7479	16.442	-1.49715	16.4418	0.40485	16.4417	-1.63005	16.4418	-1.6716	16.4417	-1.55815
16.45	-1.38545	16.4503	-1.48635	16.4503	-1.74925	16.4503	-1.49865	16.4502	0.40265	16.45	-1.63325	16.4502	-1.67185	16.45	-1.5603
16.4583	-1.3868	16.4587	-1.48925	16.4587	-1.75345	16.4587	-1.5003	16.4585	0.4029	16.4583	-1.6349	16.4585	-1.6737	16.4583	-1.565
16.4667	-1.38625	16.467	-1.48965	16.467	-1.75095	16.467	-1.504	16.4668	0.4025	16.4667	-1.63425	16.4668	-1.6761	16.4667	-1.56565
16.475	-1.38865	16.4753	-1.49295	16.4753	-1.754	16.4753	-1.50635	16.4752	0.4038	16.475	-1.6366	16.4752	-1.6786	16.475	-1.5672
16.4833	-1.38825	16.4837	-1.49435	16.4837	-1.7544	16.4837	-1.5082	16.4835	0.4005	16.4833	-1.63645	16.4835	-1.6793	16.4833	-1.56855
16.4917	-1.3901	16.492	-1.49445	16.492	-1.75475	16.492	-1.5101	16.4918	0.3992	16.4917	-1.6365	16.4918	-1.68055	16.4917	-1.57055
16.5	-1.39035	16.5003	-1.4955	16.5003	-1.75685	16.5003	-1.512	16.5002	0.4014	16.5	-1.6389	16.5002	-1.6823	16.5	-1.572
16.5083	-1.39175	16.5087	-1.49925	16.5087	-1.7591	16.5087	-1.51415	16.5085	0.4009	16.5083	-1.64085	16.5085	-1.68675	16.5083	-1.575
16.5167	-1.3935	16.517	-1.49945	16.517	-1.7592	16.517	-1.5176	16.5168	0.4019	16.5167	-1.6427	16.5168	-1.6881	16.5167	-1.5771
16.525	-1.3939	16.5253	-1.5011	16.5253	-1.75995	16.5253	-1.519	16.5252	0.4042	16.525	-1.6452	16.5252	-1.6865	16.525	-1.578
16.5333	-1.3934	16.5337	-1.5032	16.5337	-1.76115	16.5337	-1.5213	16.5335	0.4033	16.5333	-1.6445	16.5335	-1.6871	16.5333	-1.58005
16.5417	-1.3963	16.542	-1.5063	16.542	-1.76425	16.542	-1.52425	16.5418	0.40475	16.5417	-1.6489	16.5418	-1.6914	16.5417	-1.58355
16.55	-1.3968	16.5503	-1.50535	16.5503	-1.76225	16.5503	-1.5244	16.5502	0.4054	16.55	-1.6491	16.5502	-1.6896	16.55	-1.58265
16.5583	-1.3997	16.5587	-1.50845	16.5587	-1.76415	16.5587	-1.5262	16.5585	0.40645	16.5583	-1.64855	16.5585	-1.69225	16.5583	-1.58535
16.5667	-1.40095	16.567	-1.51025	16.567	-1.7646	16.567	-1.5291	16.5668	0.4067	16.5667	-1.6524	16.5668	-1.69375	16.5667	-1.5891
16.575	-1.40185	16.5753	-1.5087	16.5753	-1.76535	16.5753	-1.5295	16.5752	0.4073	16.575	-1.65205	16.5752	-1.69525	16.575	-1.5896
16.5833	-1.40275	16.5837	-1.50885	16.5837	-1.7632	16.5837	-1.52785	16.5835	0.4079	16.5833	-1.6523	16.5835	-1.6935	16.5833	-1.58755
16.5917	-1.4023	16.592	-1.51155	16.592	-1.76665	16.592	-1.5314	16.5918	0.41015	16.5917	-1.65495	16.5918	-1.69505	16.5917	-1.5914
16.6	-1.40495	16.6003	-1.51535	16.6003	-1.76765	16.6003	-1.53325	16.6002	0.4108	16.6	-1.65735	16.6002	-1.6972	16.6	-1.5933
16.6083	-1.40515	16.6087	-1.5149	16.6087	-1.76645	16.6087	-1.5358	16.6085	0.4103	16.6083	-1.6571	16.6085	-1.6968	16.6083	-1.5949
16.6167	-1.4072	16.617	-1.5155	16.617	-1.7676	16.617	-1.5358	16.6168	0.41375	16.6167	-1.65875	16.6168	-1.6963	16.6167	-1.5952
16.625	-1.4094	16.6253	-1.51785	16.6253	-1.7679	16.6253	-1.5373	16.6252	0.4118	16.625	-1.65875	16.6252	-1.6978	16.625	-1.59735
16.6333	-1.4068	16.6337	-1.51675	16.6337	-1.76605	16.6337	-1.53715	16.6335	0.41155	16.6333	-1.65825	16.6335	-1.69615	16.6333	-1.59615
[truncated: 4,604 more rows]
