# Supplementary material for: A moonlighting function of a chitin polysaccharide monooxygenase, CWR-1, in Neurospora crassa allorecognition
Source: eLife. 2022 Aug 30;11:e80459. doi: 10.7554/eLife.80459 (PMC9550227; doi:10.7554/eLife.80459)
Supplement: Figure 4—source data 2. — Blank subtracted HPAEC-PAD traces. The samples were prepared as described in ‘Materials and methods.’ The time and nC response are listed in the table. [file elife-80459-fig4-data2.xlsx]

## Sheet: Sheet1
Figure 4B Source Data (β-Chitin)
β-Chitin		β-Chitin + Asc.		HG1		HG2		HG3		HG4		HG5		HG6
time	nC	time	nC	time	nC	time	nC	time	nC	time	nC	time	nC	time	nC
0.000167	0.04	0.000333	-0.0953	0	-0.0055	0.000333	-0.0765	0	-0.14195	0.000167	0.1268	0.000333	-0.72165	0.000333	-0.1535
0.0085	0.0516	0.008667	-0.0675	0.008333	-0.00635	0.008667	-0.0718	0.008333	-0.13385	0.0085	0.1251	0.008667	-0.72525	0.008667	-0.14575
0.016833	0.0469	0.017	-0.06275	0.016667	-0.006	0.017	-0.0749	0.016667	-0.13855	0.016833	0.12585	0.017	-0.7308	0.017	-0.14445
0.025167	0.0473	0.025333	-0.0622	0.025	-0.00375	0.025333	-0.07275	0.025	-0.1364	0.025167	0.1278	0.025333	-0.7292	0.025333	-0.14415
0.0335	0.0491	0.033667	-0.06385	0.033333	-0.00485	0.033667	-0.074	0.033333	-0.13575	0.0335	0.12675	0.033667	-0.7272	0.033667	-0.14715
0.041833	0.04945	0.042	-0.0655	0.041667	-0.00415	0.042	-0.0728	0.041667	-0.13605	0.041833	0.12785	0.042	-0.7258	0.042	-0.14735
0.050167	0.0515	0.050333	-0.06565	0.05	-0.00325	0.050333	-0.07165	0.05	-0.1332	0.050167	0.1288	0.050333	-0.72565	0.050333	-0.14585
0.0585	0.0511	0.058667	-0.06675	0.058333	-0.0042	0.058667	-0.07285	0.058333	-0.1343	0.0585	0.1291	0.058667	-0.72575	0.058667	-0.14595
0.066833	0.0507	0.067	-0.0682	0.066667	-0.0029	0.067	-0.07105	0.066667	-0.13315	0.066833	0.1299	0.067	-0.72565	0.067	-0.14595
0.075167	0.0496	0.075333	-0.0702	0.075	-0.0023	0.075333	-0.0707	0.075	-0.13425	0.075167	0.12865	0.075333	-0.7271	0.075333	-0.14625
0.0835	0.0493	0.083667	-0.0697	0.083333	-0.00295	0.083667	-0.0719	0.083333	-0.1338	0.0835	0.12915	0.083667	-0.7249	0.083667	-0.14585
0.091833	0.0482	0.092	-0.0711	0.091667	-0.00415	0.092	-0.0723	0.091667	-0.13355	0.091833	0.1297	0.092	-0.724	0.092	-0.148
0.100167	0.0494	0.100333	-0.0718	0.1	-0.0015	0.100333	-0.07135	0.1	-0.13355	0.100167	0.13015	0.100333	-0.72405	0.100333	-0.14815
0.1085	0.04975	0.108667	-0.07395	0.108333	-0.00265	0.108667	-0.07275	0.108333	-0.1343	0.1085	0.12875	0.108667	-0.7245	0.108667	-0.15075
0.116833	0.0493	0.117	-0.07475	0.116667	-0.00265	0.117	-0.0734	0.116667	-0.13315	0.116833	0.1307	0.117	-0.7235	0.117	-0.1497
0.125167	0.0487	0.125333	-0.0778	0.125	-0.00365	0.125333	-0.0737	0.125	-0.1353	0.125167	0.12835	0.125333	-0.7225	0.125333	-0.1512
0.1335	0.0474	0.133667	-0.0794	0.133333	-0.00475	0.133667	-0.07615	0.133333	-0.1357	0.1335	0.12705	0.133667	-0.72425	0.133667	-0.1528
0.141833	0.04705	0.142	-0.08045	0.141667	-0.0059	0.142	-0.07695	0.141667	-0.13425	0.141833	0.1282	0.142	-0.72555	0.142	-0.1529
0.150167	0.04925	0.150333	-0.0794	0.15	-0.00405	0.150333	-0.07565	0.15	-0.13435	0.150167	0.13055	0.150333	-0.72475	0.150333	-0.1512
0.1585	0.05085	0.158667	-0.0785	0.158333	-0.0033	0.158667	-0.07505	0.158333	-0.13365	0.1585	0.13095	0.158667	-0.728	0.158667	-0.1489
0.166833	0.04925	0.167	-0.0784	0.166667	-0.0026	0.167	-0.0746	0.166667	-0.13335	0.166833	0.1312	0.167	-0.7266	0.167	-0.1504
0.175167	0.0481	0.175333	-0.07855	0.175	-0.00305	0.175333	-0.0742	0.175	-0.1336	0.175167	0.1299	0.175333	-0.7262	0.175333	-0.14905
0.1835	0.0477	0.183667	-0.0812	0.183333	-0.0044	0.183667	-0.07595	0.183333	-0.1347	0.1835	0.12985	0.183667	-0.72235	0.183667	-0.1469
0.191833	0.04875	0.192	-0.08225	0.191667	-0.0034	0.192	-0.07505	0.191667	-0.13575	0.191833	0.12985	0.192	-0.72395	0.192	-0.15235
0.200167	0.0505	0.200333	-0.08085	0.2	-0.00315	0.200333	-0.0748	0.2	-0.13385	0.200167	0.1303	0.200333	-0.7238	0.200333	-0.15315
0.2085	0.04825	0.208667	-0.0812	0.208333	-0.0029	0.208667	-0.07365	0.208333	-0.13365	0.2085	0.1315	0.208667	-0.7257	0.208667	-0.15195
0.216833	0.0485	0.217	-0.082	0.216667	-0.00325	0.217	-0.0731	0.216667	-0.1351	0.216833	0.13035	0.217	-0.7249	0.217	-0.1531
0.225167	0.04995	0.225333	-0.08215	0.225	-0.00265	0.225333	-0.072	0.225	-0.13375	0.225167	0.1303	0.225333	-0.72535	0.225333	-0.1534
0.2335	0.0501	0.233667	-0.08255	0.233333	-0.00075	0.233667	-0.07215	0.233333	-0.1332	0.2335	0.13105	0.233667	-0.72815	0.233667	-0.1512
0.241833	0.05005	0.242	-0.0826	0.241667	-0.0026	0.242	-0.07295	0.241667	-0.13385	0.241833	0.1302	0.242	-0.72655	0.242	-0.15025
0.250167	0.0509	0.250333	-0.0823	0.25	-0.00155	0.250333	-0.0744	0.25	-0.13485	0.250167	0.13075	0.250333	-0.7255	0.250333	-0.15085
0.2585	0.0505	0.258667	-0.0819	0.258333	-0.00175	0.258667	-0.0711	0.258333	-0.13315	0.2585	0.13245	0.258667	-0.72565	0.258667	-0.14805
0.266833	0.0506	0.267	-0.08015	0.266667	0.0009	0.267	-0.0714	0.266667	-0.13295	0.266833	0.13315	0.267	-0.72715	0.267	-0.14795
0.275167	0.04845	0.275333	-0.0831	0.275	-0.0032	0.275333	-0.07355	0.275	-0.134	0.275167	0.1313	0.275333	-0.7241	0.275333	-0.14865
0.2835	0.04935	0.283667	-0.08385	0.283333	-0.00205	0.283667	-0.0732	0.283333	-0.13385	0.2835	0.13235	0.283667	-0.72585	0.283667	-0.1499
0.291833	0.04825	0.292	-0.08345	0.291667	-0.0015	0.292	-0.07255	0.291667	-0.1325	0.291833	0.13235	0.292	-0.72645	0.292	-0.14975
0.300167	0.048	0.300333	-0.08195	0.3	-0.0014	0.300333	-0.0745	0.3	-0.133	0.300167	0.1326	0.300333	-0.72795	0.300333	-0.1504
0.3085	0.04855	0.308667	-0.08195	0.308333	-0.00125	0.308667	-0.0739	0.308333	-0.1321	0.3085	0.1351	0.308667	-0.72815	0.308667	-0.1483
0.316833	0.04605	0.317	-0.08615	0.316667	-0.0027	0.317	-0.07635	0.316667	-0.1354	0.316833	0.1324	0.317	-0.72925	0.317	-0.151
0.325167	0.04615	0.325333	-0.08625	0.325	-0.00275	0.325333	-0.0754	0.325	-0.1345	0.325167	0.1324	0.325333	-0.72925	0.325333	-0.1504
0.3335	0.0475	0.333667	-0.0844	0.333333	-0.0036	0.333667	-0.07575	0.333333	-0.1324	0.3335	0.13355	0.333667	-0.72825	0.333667	-0.15025
0.341833	0.04895	0.342	-0.08495	0.341667	-0.0021	0.342	-0.0737	0.341667	-0.1324	0.341833	0.1343	0.342	-0.72795	0.342	-0.1477
0.350167	0.04825	0.350333	-0.08435	0.35	-0.00195	0.350333	-0.07515	0.35	-0.1332	0.350167	0.1341	0.350333	-0.7297	0.350333	-0.14885
0.3585	0.0474	0.358667	-0.08495	0.358333	-0.0042	0.358667	-0.07505	0.358333	-0.1338	0.3585	0.13305	0.358667	-0.72995	0.358667	-0.14845
0.366833	0.0486	0.367	-0.0849	0.366667	-0.0027	0.367	-0.0752	0.366667	-0.13215	0.366833	0.13485	0.367	-0.72985	0.367	-0.1453
0.375167	0.04975	0.375333	-0.0852	0.375	-0.0034	0.375333	-0.07425	0.375	-0.13225	0.375167	0.1333	0.375333	-0.7286	0.375333	-0.1467
0.3835	0.0495	0.383667	-0.08575	0.383333	-0.00405	0.383667	-0.0739	0.383333	-0.13295	0.3835	0.13555	0.383667	-0.73025	0.383667	-0.1501
0.391833	0.05015	0.392	-0.08505	0.391667	-0.0026	0.392	-0.07325	0.391667	-0.13175	0.391833	0.1344	0.392	-0.7288	0.392	-0.1506
0.400167	0.04895	0.400333	-0.0857	0.4	-0.00375	0.400333	-0.0731	0.4	-0.13145	0.400167	0.1344	0.400333	-0.73035	0.400333	-0.1496
0.4085	0.0492	0.408667	-0.08685	0.408333	-0.0029	0.408667	-0.07345	0.408333	-0.13255	0.4085	0.1341	0.408667	-0.7313	0.408667	-0.15015
0.416833	0.04845	0.417	-0.08755	0.416667	-0.0041	0.417	-0.0731	0.416667	-0.1339	0.416833	0.13325	0.417	-0.73085	0.417	-0.1506
0.425167	0.04775	0.425333	-0.08675	0.425	-0.0039	0.425333	-0.07315	0.425	-0.1339	0.425167	0.1348	0.425333	-0.7314	0.425333	-0.14965
0.4335	0.04905	0.433667	-0.0872	0.433333	-0.0026	0.433667	-0.07415	0.433333	-0.1327	0.4335	0.1344	0.433667	-0.7307	0.433667	-0.1485
0.441833	0.0498	0.442	-0.0882	0.441667	-0.0019	0.442	-0.0727	0.441667	-0.13195	0.441833	0.135	0.442	-0.7309	0.442	-0.14955
0.450167	0.0493	0.450333	-0.0872	0.45	-0.0014	0.450333	-0.07065	0.45	-0.1318	0.450167	0.13515	0.450333	-0.7303	0.450333	-0.14735
0.4585	0.05	0.458667	-0.08735	0.458333	-0.0022	0.458667	-0.0718	0.458333	-0.13285	0.4585	0.13685	0.458667	-0.73065	0.458667	-0.1484
0.466833	0.04805	0.467	-0.08665	0.466667	-0.00485	0.467	-0.07155	0.466667	-0.13175	0.466833	0.13545	0.467	-0.7307	0.467	-0.14875
0.475167	0.04955	0.475333	-0.08665	0.475	-0.0028	0.475333	-0.0711	0.475	-0.13085	0.475167	0.13665	0.475333	-0.7278	0.475333	-0.14775
0.4835	0.0491	0.483667	-0.08695	0.483333	-0.00175	0.483667	-0.07125	0.483333	-0.1306	0.4835	0.13685	0.483667	-0.72765	0.483667	-0.1478
0.491833	0.04695	0.492	-0.0859	0.491667	-0.00295	0.492	-0.0736	0.491667	-0.131	0.491833	0.137	0.492	-0.7307	0.492	-0.1489
0.500167	0.04875	0.500333	-0.0879	0.5	-0.0034	0.500333	-0.0729	0.5	-0.13105	0.500167	0.137	0.500333	-0.7282	0.500333	-0.1492
0.5085	0.04725	0.508667	-0.08895	0.508333	-0.0042	0.508667	-0.0758	0.508333	-0.1334	0.5085	0.1352	0.508667	-0.73075	0.508667	-0.15005
0.516833	0.045	0.517	-0.09055	0.516667	-0.00675	0.517	-0.07725	0.516667	-0.13415	0.516833	0.1355	0.517	-0.7317	0.517	-0.151
0.525167	0.0488	0.525333	-0.08655	0.525	-0.0032	0.525333	-0.075	0.525	-0.1312	0.525167	0.13895	0.525333	-0.73305	0.525333	-0.1473
0.5335	0.05115	0.533667	-0.08475	0.533333	-0.00115	0.533667	-0.07415	0.533333	-0.13005	0.5335	0.14	0.533667	-0.7323	0.533667	-0.14555
0.541833	0.0488	0.542	-0.08655	0.541667	-0.00415	0.542	-0.0755	0.541667	-0.13235	0.541833	0.1384	0.542	-0.73285	0.542	-0.14605
0.550167	0.04755	0.550333	-0.08785	0.55	-0.00485	0.550333	-0.07565	0.55	-0.13105	0.550167	0.1376	0.550333	-0.7278	0.550333	-0.1468
0.5585	0.0482	0.558667	-0.08835	0.558333	-0.0043	0.558667	-0.0765	0.558333	-0.13125	0.5585	0.1361	0.558667	-0.7316	0.558667	-0.1458
0.566833	0.04985	0.567	-0.08845	0.566667	-0.00535	0.567	-0.07695	0.566667	-0.1315	0.566833	0.13675	0.567	-0.72945	0.567	-0.1492
0.575167	0.04905	0.575333	-0.0883	0.575	-0.00575	0.575333	-0.0772	0.575	-0.1329	0.575167	0.1361	0.575333	-0.73105	0.575333	-0.1503
0.5835	0.04795	0.583667	-0.08835	0.583333	-0.00605	0.583667	-0.0758	0.583333	-0.13265	0.5835	0.1366	0.583667	-0.72985	0.583667	-0.1504
0.591833	0.04755	0.592	-0.08875	0.591667	-0.00475	0.592	-0.0758	0.591667	-0.1313	0.591833	0.1365	0.592	-0.72755	0.592	-0.1497
0.600167	0.04875	0.600333	-0.0899	0.6	-0.0042	0.600333	-0.07415	0.6	-0.13195	0.600167	0.13685	0.600333	-0.7303	0.600333	-0.14945
0.6085	0.0499	0.608667	-0.0871	0.608333	-0.0018	0.608667	-0.07265	0.608333	-0.1312	0.6085	0.13995	0.608667	-0.73015	0.608667	-0.1472
0.616833	0.04985	0.617	-0.0887	0.616667	-0.00325	0.617	-0.0744	0.616667	-0.13255	0.616833	0.13955	0.617	-0.72925	0.617	-0.1473
0.625167	0.0508	0.625333	-0.08755	0.625	-0.0019	0.625333	-0.07305	0.625	-0.13125	0.625167	0.1401	0.625333	-0.7264	0.625333	-0.1468
0.6335	0.0508	0.633667	-0.08775	0.633333	-0.00245	0.633667	-0.07325	0.633333	-0.12965	0.6335	0.13825	0.633667	-0.72655	0.633667	-0.14765
0.641833	0.05095	0.642	-0.0863	0.641667	-0.0008	0.642	-0.07095	0.641667	-0.12985	0.641833	0.1393	0.642	-0.7258	0.642	-0.1449
0.650167	0.05035	0.650333	-0.08855	0.65	-0.0033	0.650333	-0.0726	0.65	-0.1304	0.650167	0.13975	0.650333	-0.72615	0.650333	-0.1462
0.6585	0.049	0.658667	-0.08925	0.658333	-0.0031	0.658667	-0.073	0.658333	-0.13035	0.6585	0.13965	0.658667	-0.7268	0.658667	-0.1467
0.666833	0.05075	0.667	-0.08755	0.666667	-0.00045	0.667	-0.07225	0.666667	-0.12995	0.666833	0.1394	0.667	-0.7263	0.667	-0.1462
0.675167	0.04985	0.675333	-0.08805	0.675	-0.002	0.675333	-0.074	0.675	-0.13025	0.675167	0.13935	0.675333	-0.7269	0.675333	-0.1462
0.6835	0.04925	0.683667	-0.0884	0.683333	-0.0022	0.683667	-0.0734	0.683333	-0.1288	0.6835	0.1415	0.683667	-0.728	0.683667	-0.14585
0.691833	0.04855	0.692	-0.0891	0.691667	-0.00225	0.692	-0.07445	0.691667	-0.1298	0.691833	0.1401	0.692	-0.7257	0.692	-0.14605
0.700167	0.04885	0.700333	-0.08945	0.7	-0.00325	0.700333	-0.07575	0.7	-0.1309	0.700167	0.1389	0.700333	-0.72705	0.700333	-0.1466
0.7085	0.04825	0.708667	-0.0892	0.708333	-0.0042	0.708667	-0.0752	0.708333	-0.1306	0.7085	0.1398	0.708667	-0.7279	0.708667	-0.1455
0.716833	0.05005	0.717	-0.08655	0.716667	-0.002	0.717	-0.0739	0.716667	-0.12785	0.716833	0.1406	0.717	-0.72985	0.717	-0.1442
0.725167	0.04855	0.725333	-0.08785	0.725	-0.00385	0.725333	-0.0745	0.725	-0.12905	0.725167	0.1412	0.725333	-0.7267	0.725333	-0.14385
0.7335	0.0481	0.733667	-0.0896	0.733333	-0.0047	0.733667	-0.0759	0.733333	-0.13025	0.7335	0.13975	0.733667	-0.72785	0.733667	-0.14555
0.741833	0.04835	0.742	-0.08925	0.741667	-0.0042	0.742	-0.0755	0.741667	-0.13	0.741833	0.1416	0.742	-0.72555	0.742	-0.1411
0.750167	0.0498	0.750333	-0.09115	0.75	-0.005	0.750333	-0.07515	0.75	-0.1323	0.750167	0.13975	0.750333	-0.7272	0.750333	-0.14515
0.7585	0.04935	0.758667	-0.0917	0.758333	-0.0051	0.758667	-0.07555	0.758333	-0.1317	0.7585	0.13915	0.758667	-0.7259	0.758667	-0.14885
0.766833	0.04845	0.767	-0.09265	0.766667	-0.00415	0.767	-0.07655	0.766667	-0.13205	0.766833	0.1391	0.767	-0.7258	0.767	-0.1469
0.775167	0.04905	0.775333	-0.0906	0.775	-0.0025	0.775333	-0.07375	0.775	-0.12985	0.775167	0.1405	0.775333	-0.72725	0.775333	-0.14525
0.7835	0.05015	0.783667	-0.0907	0.783333	-0.003	0.783667	-0.07515	0.783333	-0.13185	0.7835	0.13955	0.783667	-0.7255	0.783667	-0.1459
0.791833	0.04965	0.792	-0.0902	0.791667	-0.0034	0.792	-0.0745	0.791667	-0.1312	0.791833	0.1407	0.792	-0.7253	0.792	-0.14445
0.800167	0.05095	0.800333	-0.09055	0.8	-0.002	0.800333	-0.073	0.8	-0.1304	0.800167	0.14075	0.800333	-0.7254	0.800333	-0.14505
0.8085	0.04935	0.808667	-0.0922	0.808333	-0.0033	0.808667	-0.07515	0.808333	-0.1311	0.8085	0.1389	0.808667	-0.72325	0.808667	-0.145
0.816833	0.05	0.817	-0.09155	0.816667	-0.00505	0.817	-0.075	0.816667	-0.13085	0.816833	0.13925	0.817	-0.7244	0.817	-0.14475
0.825167	0.0485	0.825333	-0.0909	0.825	-0.0031	0.825333	-0.07395	0.825	-0.13	0.825167	0.13985	0.825333	-0.72435	0.825333	-0.145
0.8335	0.04885	0.833667	-0.09	0.833333	-0.004	0.833667	-0.07405	0.833333	-0.1304	0.8335	0.1402	0.833667	-0.7242	0.833667	-0.1447
0.841833	0.0495	0.842	-0.0911	0.841667	-0.00405	0.842	-0.07315	0.841667	-0.12955	0.841833	0.1414	0.842	-0.7228	0.842	-0.1448
0.850167	0.04885	0.850333	-0.0911	0.85	-0.0034	0.850333	-0.0725	0.85	-0.12885	0.850167	0.14035	0.850333	-0.7205	0.850333	-0.1433
0.8585	0.0493	0.858667	-0.09185	0.858333	-0.0029	0.858667	-0.0744	0.858333	-0.1304	0.8585	0.14185	0.858667	-0.72355	0.858667	-0.1444
0.866833	0.0479	0.867	-0.09085	0.866667	-0.0036	0.867	-0.07425	0.866667	-0.12895	0.866833	0.14295	0.867	-0.72205	0.867	-0.1444
0.875167	0.0481	0.875333	-0.0927	0.875	-0.0032	0.875333	-0.0758	0.875	-0.12805	0.875167	0.14085	0.875333	-0.72245	0.875333	-0.14415
0.8835	0.04815	0.883667	-0.0928	0.883333	-0.00415	0.883667	-0.0753	0.883333	-0.1296	0.8835	0.14125	0.883667	-0.7228	0.883667	-0.14445
0.891833	0.04825	0.892	-0.0931	0.891667	-0.00435	0.892	-0.0773	0.891667	-0.13095	0.891833	0.13965	0.892	-0.72375	0.892	-0.1453
0.900167	0.04705	0.900333	-0.0919	0.9	-0.0042	0.900333	-0.07575	0.9	-0.1301	0.900167	0.14125	0.900333	-0.7219	0.900333	-0.1429
0.9085	0.05055	0.908667	-0.0919	0.908333	-0.00545	0.908667	-0.07595	0.908333	-0.12845	0.9085	0.14265	0.908667	-0.72245	0.908667	-0.14275
0.916833	0.0489	0.917	-0.0917	0.916667	-0.0044	0.917	-0.07585	0.916667	-0.1284	0.916833	0.1418	0.917	-0.72095	0.917	-0.1425
0.925167	0.0485	0.925333	-0.09225	0.925	-0.0054	0.925333	-0.07625	0.925	-0.1282	0.925167	0.14365	0.925333	-0.72345	0.925333	-0.1418
0.9335	0.05005	0.933667	-0.0938	0.933333	-0.00475	0.933667	-0.0756	0.933333	-0.12965	0.9335	0.14165	0.933667	-0.72285	0.933667	-0.14065
0.941833	0.0491	0.942	-0.0945	0.941667	-0.00675	0.942	-0.07555	0.941667	-0.1296	0.941833	0.142	0.942	-0.72205	0.942	-0.1445
0.950167	0.0486	0.950333	-0.09385	0.95	-0.00595	0.950333	-0.07665	0.95	-0.13025	0.950167	0.14175	0.950333	-0.7209	0.950333	-0.14625
0.9585	0.04875	0.958667	-0.09545	0.958333	-0.00515	0.958667	-0.07505	0.958333	-0.13045	0.9585	0.14155	0.958667	-0.7212	0.958667	-0.144
0.966833	0.04955	0.967	-0.09365	0.966667	-0.00445	0.967	-0.075	0.966667	-0.13	0.966833	0.1421	0.967	-0.7204	0.967	-0.1441
0.975167	0.05115	0.975333	-0.0929	0.975	-0.00325	0.975333	-0.07555	0.975	-0.12985	0.975167	0.1427	0.975333	-0.72235	0.975333	-0.14275
0.9835	0.05225	0.983667	-0.09355	0.983333	-0.00465	0.983667	-0.0732	0.983333	-0.12915	0.9835	0.14305	0.983667	-0.722	0.983667	-0.1419
0.991833	0.05285	0.992	-0.09175	0.991667	-0.00305	0.992	-0.0733	0.991667	-0.1286	0.991833	0.1437	0.992	-0.7186	0.992	-0.14005
1.00017	0.05195	1.00033	-0.09355	1	-0.004	1.00033	-0.0742	1	-0.1291	1.00017	0.1434	1.00033	-0.72005	1.00033	-0.1417
1.0085	0.05275	1.00867	-0.09155	1.00833	-0.0025	1.00867	-0.0737	1.00833	-0.1275	1.0085	0.14375	1.00867	-0.72105	1.00867	-0.1396
1.01683	0.05075	1.017	-0.0929	1.01667	-0.00235	1.017	-0.074	1.01667	-0.12795	1.01683	0.1437	1.017	-0.7204	1.017	-0.1395
1.02517	0.0511	1.02533	-0.09195	1.025	-0.00275	1.02533	-0.07315	1.025	-0.12695	1.02517	0.1438	1.02533	-0.7181	1.02533	-0.13965
1.0335	0.051	1.03367	-0.09185	1.03333	-0.00255	1.03367	-0.0721	1.03333	-0.12665	1.0335	0.14415	1.03367	-0.71875	1.03367	-0.14015
1.04183	0.05025	1.042	-0.0936	1.04167	-0.0025	1.042	-0.0726	1.04167	-0.12725	1.04183	0.14435	1.042	-0.71885	1.042	-0.13995
1.05017	0.0482	1.05033	-0.0942	1.05	-0.0037	1.05033	-0.07395	1.05	-0.12845	1.05017	0.1433	1.05033	-0.7212	1.05033	-0.14105
1.0585	0.0497	1.05867	-0.0927	1.05833	-0.00315	1.05867	-0.07335	1.05833	-0.1269	1.0585	0.1449	1.05867	-0.72185	1.05867	-0.1396
1.06683	0.04915	1.067	-0.09415	1.06667	-0.00235	1.067	-0.0739	1.06667	-0.12765	1.06683	0.14375	1.067	-0.7197	1.067	-0.14
1.07517	0.04925	1.07533	-0.09325	1.075	-0.00295	1.07533	-0.07455	1.075	-0.1288	1.07517	0.1439	1.07533	-0.7222	1.07533	-0.13985
1.0835	0.0496	1.08367	-0.0928	1.08333	-0.0021	1.08367	-0.07365	1.08333	-0.1262	1.0835	0.14425	1.08367	-0.72005	1.08367	-0.13915
1.09183	0.05045	1.092	-0.09345	1.09167	-0.0038	1.092	-0.07405	1.09167	-0.12595	1.09183	0.14595	1.092	-0.7175	1.092	-0.13845
1.10017	0.0502	1.10033	-0.0934	1.1	-0.00375	1.10033	-0.07385	1.1	-0.1279	1.10017	0.14465	1.10033	-0.71895	1.10033	-0.13775
1.1085	0.04935	1.10867	-0.09315	1.10833	-0.00575	1.10867	-0.07525	1.10833	-0.12775	1.1085	0.14625	1.10867	-0.7187	1.10867	-0.1384
1.11683	0.04945	1.117	-0.09305	1.11667	-0.0052	1.117	-0.0741	1.11667	-0.127	1.11683	0.1452	1.117	-0.7196	1.117	-0.13675
1.12517	0.04725	1.12533	-0.0954	1.125	-0.00595	1.12533	-0.0773	1.125	-0.12845	1.12517	0.1443	1.12533	-0.7166	1.12533	-0.1405
1.1335	0.0483	1.13367	-0.0954	1.13333	-0.0074	1.13367	-0.07595	1.13333	-0.1285	1.1335	0.1438	1.13367	-0.7183	1.13367	-0.142
1.14183	0.04835	1.142	-0.09455	1.14167	-0.00605	1.142	-0.07525	1.14167	-0.1287	1.14183	0.1429	1.142	-0.7197	1.142	-0.14105
1.15017	0.0488	1.15033	-0.0938	1.15	-0.00555	1.15033	-0.0741	1.15	-0.12695	1.15017	0.1444	1.15033	-0.7191	1.15033	-0.1404
1.1585	0.04875	1.15867	-0.09415	1.15833	-0.0041	1.15867	-0.07425	1.15833	-0.1266	1.1585	0.1444	1.15867	-0.7157	1.15867	-0.14005
1.16683	0.04875	1.167	-0.09605	1.16667	-0.00495	1.167	-0.07405	1.16667	-0.128	1.16683	0.14415	1.167	-0.71675	1.167	-0.1397
1.17517	0.04965	1.17533	-0.09385	1.175	-0.0037	1.17533	-0.07285	1.175	-0.12735	1.17517	0.14455	1.17533	-0.717	1.17533	-0.13895
1.1835	0.05105	1.18367	-0.09405	1.18333	-0.0041	1.18367	-0.07485	1.18333	-0.12895	1.1835	0.14555	1.18367	-0.7169	1.18367	-0.1379
1.19183	0.05085	1.192	-0.0935	1.19167	-0.00415	1.192	-0.0731	1.19167	-0.1278	1.19183	0.1451	1.192	-0.71745	1.192	-0.1384
1.20017	0.05065	1.20033	-0.09485	1.2	-0.0031	1.20033	-0.0728	1.2	-0.12725	1.20017	0.14565	1.20033	-0.71775	1.20033	-0.1366
1.2085	0.04915	1.20867	-0.09425	1.20833	-0.00405	1.20867	-0.0736	1.20833	-0.127	1.2085	0.1443	1.20867	-0.7181	1.20867	-0.13805
1.21683	0.04795	1.217	-0.09385	1.21667	-0.0053	1.217	-0.0738	1.21667	-0.1267	1.21683	0.14575	1.217	-0.71645	1.217	-0.13815
1.22517	0.0467	1.22533	-0.09485	1.225	-0.0052	1.22533	-0.07385	1.225	-0.1287	1.22517	0.14515	1.22533	-0.7154	1.22533	-0.1396
1.2335	0.04865	1.23367	-0.09345	1.23333	-0.0048	1.23367	-0.07305	1.23333	-0.12675	1.2335	0.1459	1.23367	-0.71695	1.23367	-0.13815
1.24183	0.04755	1.242	-0.09425	1.24167	-0.00575	1.242	-0.0741	1.24167	-0.1269	1.24183	0.14575	1.242	-0.71675	1.242	-0.13885
1.25017	0.04805	1.25033	-0.0932	1.25	-0.0048	1.25033	-0.0738	1.25	-0.12685	1.25017	0.14585	1.25033	-0.71845	1.25033	-0.1382
1.2585	0.0493	1.25867	-0.09505	1.25833	-0.0041	1.25867	-0.0752	1.25833	-0.12765	1.2585	0.1443	1.25867	-0.7174	1.25867	-0.13775
1.26683	0.0471	1.267	-0.0945	1.26667	-0.0053	1.267	-0.0754	1.26667	-0.12715	1.26683	0.1446	1.267	-0.71635	1.267	-0.1396
1.27517	0.0489	1.27533	-0.09365	1.275	-0.00505	1.27533	-0.0748	1.275	-0.1262	1.27517	0.1445	1.27533	-0.71835	1.27533	-0.13905
1.2835	0.0493	1.28367	-0.0933	1.28333	-0.0045	1.28367	-0.0758	1.28333	-0.127	1.2835	0.14575	1.28367	-0.71975	1.28367	-0.13745
1.29183	0.04875	1.292	-0.0931	1.29167	-0.00495	1.292	-0.0748	1.29167	-0.1263	1.29183	0.14635	1.292	-0.72175	1.292	-0.137
1.30017	0.04775	1.30033	-0.0941	1.3	-0.00595	1.30033	-0.07625	1.3	-0.12635	1.30017	0.14635	1.30033	-0.7209	1.30033	-0.1357
1.3085	0.0483	1.30867	-0.0947	1.30833	-0.00535	1.30867	-0.076	1.30833	-0.127	1.3085	0.14595	1.30867	-0.7204	1.30867	-0.1363
1.31683	0.04905	1.317	-0.0952	1.31667	-0.0057	1.317	-0.07615	1.31667	-0.12875	1.31683	0.1457	1.317	-0.722	1.317	-0.1408
1.32517	0.04905	1.32533	-0.09625	1.325	-0.00625	1.32533	-0.0766	1.325	-0.12845	1.32517	0.1447	1.32533	-0.72185	1.32533	-0.1405
1.3335	0.048	1.33367	-0.0959	1.33333	-0.00585	1.33367	-0.07695	1.33333	-0.12745	1.3335	0.1446	1.33367	-0.71955	1.33367	-0.1393
1.34183	0.0493	1.342	-0.09505	1.34167	-0.0043	1.342	-0.07365	1.34167	-0.1264	1.34183	0.14535	1.342	-0.721	1.342	-0.14015
1.35017	0.049	1.35033	-0.09585	1.35	-0.00475	1.35033	-0.07255	1.35	-0.12795	1.35017	0.1445	1.35033	-0.7209	1.35033	-0.14025
1.3585	0.04875	1.35867	-0.0948	1.35833	-0.0053	1.35867	-0.07165	1.35833	-0.1267	1.3585	0.14455	1.35867	-0.72055	1.35867	-0.1387
1.36683	0.0482	1.367	-0.0964	1.36667	-0.00585	1.367	-0.07355	1.36667	-0.12795	1.36683	0.14375	1.367	-0.71825	1.367	-0.13935
1.37517	0.0499	1.37533	-0.09575	1.375	-0.00355	1.37533	-0.0735	1.375	-0.12625	1.37517	0.1444	1.37533	-0.71805	1.37533	-0.13685
1.3835	0.049	1.38367	-0.0954	1.38333	-0.00505	1.38367	-0.07115	1.38333	-0.12685	1.3835	0.1452	1.38367	-0.7214	1.38367	-0.13785
1.39183	0.04975	1.392	-0.0944	1.39167	-0.00345	1.392	-0.0721	1.39167	-0.12795	1.39183	0.14535	1.392	-0.72185	1.392	-0.13585
1.40017	0.04895	1.40033	-0.0963	1.4	-0.0061	1.40033	-0.07305	1.4	-0.12775	1.40017	0.14395	1.40033	-0.7224	1.40033	-0.13735
1.4085	0.04915	1.40867	-0.0963	1.40833	-0.0056	1.40867	-0.07335	1.40833	-0.12795	1.4085	0.1432	1.40867	-0.7217	1.40867	-0.1376
1.41683	0.0467	1.417	-0.09615	1.41667	-0.0044	1.417	-0.0724	1.41667	-0.12825	1.41683	0.1441	1.417	-0.72145	1.417	-0.1385
1.42517	0.04885	1.42533	-0.0948	1.425	-0.0033	1.42533	-0.0719	1.425	-0.12725	1.42517	0.14565	1.42533	-0.72085	1.42533	-0.13825
1.4335	0.0477	1.43367	-0.09465	1.43333	-0.0034	1.43367	-0.073	1.43333	-0.1271	1.4335	0.1467	1.43367	-0.72025	1.43367	-0.1375
1.44183	0.04785	1.442	-0.0975	1.44167	-0.0036	1.442	-0.07345	1.44167	-0.1282	1.44183	0.14435	1.442	-0.7219	1.442	-0.1375
1.45017	0.04815	1.45033	-0.0964	1.45	-0.0031	1.45033	-0.0732	1.45	-0.1283	1.45017	0.1448	1.45033	-0.72285	1.45033	-0.13675
1.4585	0.04645	1.45867	-0.0969	1.45833	-0.00545	1.45867	-0.07585	1.45833	-0.128	1.4585	0.14535	1.45867	-0.72485	1.45867	-0.1382
1.46683	0.0474	1.467	-0.097	1.46667	-0.00545	1.467	-0.0752	1.46667	-0.12775	1.46683	0.1454	1.467	-0.72555	1.467	-0.137
1.47517	0.048	1.47533	-0.09625	1.475	-0.0051	1.47533	-0.0745	1.475	-0.1262	1.47517	0.1464	1.47533	-0.7246	1.47533	-0.1366
1.4835	0.0474	1.48367	-0.0963	1.48333	-0.00605	1.48367	-0.0754	1.48333	-0.12725	1.4835	0.14515	1.48367	-0.7226	1.48367	-0.13715
1.49183	0.04805	1.492	-0.0975	1.49167	-0.00635	1.492	-0.07435	1.49167	-0.1276	1.49183	0.14655	1.492	-0.72365	1.492	-0.13485
1.50017	0.0482	1.50033	-0.09765	1.5	-0.00675	1.50033	-0.0758	1.5	-0.12915	1.50017	0.1444	1.50033	-0.72415	1.50033	-0.13705
1.5085	0.04695	1.50867	-0.1004	1.50833	-0.00885	1.50867	-0.077	1.50833	-0.13135	1.5085	0.14395	1.50867	-0.7238	1.50867	-0.14125
1.51683	0.04795	1.517	-0.0992	1.51667	-0.0064	1.517	-0.07615	1.51667	-0.1293	1.51683	0.1437	1.517	-0.7217	1.517	-0.13975
1.52517	0.04815	1.52533	-0.09805	1.525	-0.0061	1.52533	-0.07515	1.525	-0.1284	1.52517	0.14535	1.52533	-0.72515	1.52533	-0.13885
1.5335	0.04905	1.53367	-0.0966	1.53333	-0.00485	1.53367	-0.07515	1.53333	-0.12905	1.5335	0.1456	1.53367	-0.7243	1.53367	-0.13915
1.54183	0.04885	1.542	-0.0968	1.54167	-0.00465	1.542	-0.07465	1.54167	-0.12815	1.54183	0.1444	1.542	-0.7232	1.542	-0.13875
1.55017	0.04975	1.55033	-0.09825	1.55	-0.0058	1.55033	-0.0752	1.55	-0.12885	1.55017	0.14485	1.55033	-0.725	1.55033	-0.138
1.5585	0.04915	1.55867	-0.0987	1.55833	-0.00515	1.55867	-0.0765	1.55833	-0.1292	1.5585	0.1437	1.55867	-0.72255	1.55867	-0.13785
1.56683	0.05015	1.567	-0.0982	1.56667	-0.00585	1.567	-0.0753	1.56667	-0.12825	1.56683	0.144	1.567	-0.7232	1.567	-0.1372
1.57517	0.04985	1.57533	-0.0969	1.575	-0.0034	1.57533	-0.07535	1.575	-0.12825	1.57517	0.1444	1.57533	-0.72155	1.57533	-0.1368
1.5835	0.04945	1.58367	-0.0974	1.58333	-0.00375	1.58367	-0.07425	1.58333	-0.1287	1.5835	0.1445	1.58367	-0.7217	1.58367	-0.1374
1.59183	0.04705	1.592	-0.0979	1.59167	-0.0044	1.592	-0.07545	1.59167	-0.12825	1.59183	0.14485	1.592	-0.72205	1.592	-0.1376
1.60017	0.0486	1.60033	-0.09685	1.6	-0.00445	1.60033	-0.075	1.6	-0.12865	1.60017	0.146	1.60033	-0.72285	1.60033	-0.13675
1.6085	0.04845	1.60867	-0.0964	1.60833	-0.0035	1.60867	-0.07615	1.60833	-0.128	1.6085	0.1453	1.60867	-0.72395	1.60867	-0.13695
1.61683	0.0477	1.617	-0.0969	1.61667	-0.00505	1.617	-0.0779	1.61667	-0.12825	1.61683	0.14575	1.617	-0.72425	1.617	-0.13865
1.62517	0.045	1.62533	-0.09985	1.625	-0.0057	1.62533	-0.07785	1.625	-0.1294	1.62517	0.1445	1.62533	-0.7247	1.62533	-0.13855
1.6335	0.0449	1.63367	-0.10185	1.63333	-0.0067	1.63367	-0.0783	1.63333	-0.13075	1.6335	0.14305	1.63367	-0.7235	1.63367	-0.14215
1.64183	0.0445	1.642	-0.10265	1.64167	-0.00795	1.642	-0.0798	1.64167	-0.1322	1.64183	0.14245	1.642	-0.7216	1.642	-0.1424
1.65017	0.0465	1.65033	-0.10155	1.65	-0.0059	1.65033	-0.07785	1.65	-0.1304	1.65017	0.14515	1.65033	-0.72205	1.65033	-0.13975
1.6585	0.04595	1.65867	-0.10055	1.65833	-0.0057	1.65867	-0.07925	1.65833	-0.1306	1.6585	0.1437	1.65867	-0.7221	1.65867	-0.13775
1.66683	0.0458	1.667	-0.09765	1.66667	-0.00765	1.667	-0.07915	1.66667	-0.1309	1.66683	0.1417	1.667	-0.7224	1.667	-0.1375
1.67517	0.0473	1.67533	-0.0956	1.675	-0.0057	1.67533	-0.07785	1.675	-0.1296	1.67517	0.14465	1.67533	-0.7213	1.67533	-0.1327
1.6835	0.04625	1.68367	-0.09765	1.68333	-0.0063	1.68367	-0.08025	1.68333	-0.1291	1.6835	0.1427	1.68367	-0.7176	1.68367	-0.1372
1.69183	0.04685	1.692	-0.09695	1.69167	-0.0088	1.692	-0.07915	1.69167	-0.1302	1.69183	0.14115	1.692	-0.72065	1.692	-0.13955
1.70017	0.0449	1.70033	-0.09965	1.7	-0.0091	1.70033	-0.08235	1.7	-0.13175	1.70017	0.1392	1.70033	-0.72195	1.70033	-0.14235
1.7085	0.04585	1.70867	-0.09965	1.70833	-0.0111	1.70867	-0.08165	1.70833	-0.13185	1.7085	0.1409	1.70867	-0.7226	1.70867	-0.1404
1.71683	0.0467	1.717	-0.10045	1.71667	-0.00925	1.717	-0.0805	1.71667	-0.13115	1.71683	0.1411	1.717	-0.72295	1.717	-0.14135
1.72517	0.04815	1.72533	-0.09975	1.725	-0.007	1.72533	-0.07825	1.725	-0.13105	1.72517	0.1431	1.72533	-0.7245	1.72533	-0.1393
1.7335	0.04805	1.73367	-0.0994	1.73333	-0.0079	1.73367	-0.0775	1.73333	-0.1308	1.7335	0.14195	1.73367	-0.722	1.73367	-0.13825
1.74183	0.04755	1.742	-0.09975	1.74167	-0.00765	1.742	-0.07885	1.74167	-0.1299	1.74183	0.1422	1.742	-0.7203	1.742	-0.13765
1.75017	0.04855	1.75033	-0.1	1.75	-0.00695	1.75033	-0.0778	1.75	-0.13025	1.75017	0.1432	1.75033	-0.72045	1.75033	-0.1386
1.7585	0.04615	1.75867	-0.10055	1.75833	-0.00755	1.75867	-0.07925	1.75833	-0.13115	1.7585	0.1422	1.75867	-0.71785	1.75867	-0.13945
1.76683	0.04745	1.767	-0.1001	1.76667	-0.0057	1.767	-0.0765	1.76667	-0.13025	1.76683	0.144	1.767	-0.71925	1.767	-0.13815
1.77517	0.04585	1.77533	-0.09925	1.775	-0.00715	1.77533	-0.0778	1.775	-0.1293	1.77517	0.14385	1.77533	-0.71975	1.77533	-0.1393
1.7835	0.04425	1.78367	-0.1016	1.78333	-0.009	1.78367	-0.0794	1.78333	-0.1308	1.7835	0.1407	1.78367	-0.71895	1.78367	-0.14145
1.79183	0.0462	1.792	-0.1011	1.79167	-0.0082	1.792	-0.07725	1.79167	-0.1309	1.79183	0.14115	1.792	-0.71785	1.792	-0.1398
1.80017	0.0456	1.80033	-0.09965	1.8	-0.0068	1.80033	-0.0778	1.8	-0.13055	1.80017	0.14235	1.80033	-0.7183	1.80033	-0.13965
1.8085	0.0456	1.80867	-0.0998	1.80833	-0.00795	1.80867	-0.0779	1.80833	-0.12905	1.8085	0.1426	1.80867	-0.71915	1.80867	-0.1393
1.81683	0.0438	1.817	-0.1021	1.81667	-0.0075	1.817	-0.0795	1.81667	-0.13075	1.81683	0.1408	1.817	-0.71685	1.817	-0.1408
1.82517	0.04335	1.82533	-0.1012	1.825	-0.0094	1.82533	-0.07995	1.825	-0.1313	1.82517	0.1408	1.82533	-0.71995	1.82533	-0.14155
1.8335	0.04345	1.83367	-0.1019	1.83333	-0.00995	1.83367	-0.08015	1.83333	-0.13085	1.8335	0.14065	1.83367	-0.72105	1.83367	-0.14145
1.84183	0.04505	1.842	-0.1	1.84167	-0.0082	1.842	-0.0785	1.84167	-0.1293	1.84183	0.1424	1.842	-0.71885	1.842	-0.14005
1.85017	0.04655	1.85033	-0.0988	1.85	-0.0079	1.85033	-0.078	1.85	-0.12925	1.85017	0.14275	1.85033	-0.71955	1.85033	-0.1386
1.8585	0.0455	1.85867	-0.101	1.85833	-0.00925	1.85867	-0.0797	1.85833	-0.1297	1.8585	0.1417	1.85867	-0.7184	1.85867	-0.1395
1.86683	0.0443	1.867	-0.1019	1.86667	-0.01015	1.867	-0.0804	1.86667	-0.132	1.86683	0.1411	1.867	-0.7176	1.867	-0.1387
1.87517	0.04525	1.87533	-0.10205	1.875	-0.01025	1.87533	-0.0806	1.875	-0.1321	1.87517	0.1401	1.87533	-0.7155	1.87533	-0.1413
1.8835	0.04665	1.88367	-0.1034	1.88333	-0.01055	1.88367	-0.08005	1.88333	-0.1322	1.8835	0.1398	1.88367	-0.7168	1.88367	-0.1422
1.89183	0.045	1.892	-0.1051	1.89167	-0.0103	1.892	-0.0793	1.89167	-0.1313	1.89183	0.13905	1.892	-0.7164	1.892	-0.14175
1.90017	0.04455	1.90033	-0.10285	1.9	-0.00855	1.90033	-0.07835	1.9	-0.13105	1.90017	0.14	1.90033	-0.713	1.90033	-0.14125
1.9085	0.0464	1.90867	-0.1018	1.90833	-0.00715	1.90867	-0.07835	1.90833	-0.1303	1.9085	0.14085	1.90867	-0.7117	1.90867	-0.1408
1.91683	0.0468	1.917	-0.10205	1.91667	-0.0087	1.917	-0.0771	1.91667	-0.13205	1.91683	0.1401	1.917	-0.71505	1.917	-0.1402
1.92517	0.04655	1.92533	-0.10115	1.925	-0.008	1.92533	-0.07545	1.925	-0.1298	1.92517	0.1407	1.92533	-0.71445	1.92533	-0.13805
1.9335	0.04705	1.93367	-0.1004	1.93333	-0.0089	1.93367	-0.0764	1.93333	-0.1299	1.9335	0.1403	1.93367	-0.7119	1.93367	-0.13855
1.94183	0.048	1.942	-0.1002	1.94167	-0.00825	1.942	-0.07665	1.94167	-0.1286	1.94183	0.14045	1.942	-0.7152	1.942	-0.13885
1.95017	0.0472	1.95033	-0.1007	1.95	-0.00795	1.95033	-0.0755	1.95	-0.13055	1.95017	0.14095	1.95033	-0.7127	1.95033	-0.1398
1.9585	0.04465	1.95867	-0.10075	1.95833	-0.00755	1.95867	-0.0772	1.95833	-0.13085	1.9585	0.1405	1.95867	-0.71115	1.95867	-0.1404
1.96683	0.0456	1.967	-0.1	1.96667	-0.0082	1.967	-0.07675	1.96667	-0.1309	1.96683	0.1414	1.967	-0.71245	1.967	-0.13925
1.97517	0.0454	1.97533	-0.09975	1.975	-0.0077	1.97533	-0.0764	1.975	-0.1301	1.97517	0.1418	1.97533	-0.7145	1.97533	-0.1388
1.9835	0.045	1.98367	-0.1015	1.98333	-0.0084	1.98367	-0.0777	1.98333	-0.1314	1.9835	0.14055	1.98367	-0.71225	1.98367	-0.14255
1.99183	0.0447	1.992	-0.1009	1.99167	-0.00775	1.992	-0.0765	1.99167	-0.12945	1.99183	0.14205	1.992	-0.71195	1.992	-0.14075
2.00017	0.0437	2.00033	-0.10235	2	-0.0095	2.00033	-0.07695	2	-0.1304	2.00017	0.13935	2.00033	-0.70995	2.00033	-0.1412
2.0085	0.04535	2.00867	-0.10185	2.00833	-0.0075	2.00867	-0.0771	2.00833	-0.1306	2.0085	0.142	2.00867	-0.7101	2.00867	-0.14
2.01683	0.04465	2.017	-0.10185	2.01667	-0.01055	2.017	-0.07855	2.01667	-0.13145	2.01683	0.1413	2.017	-0.70975	2.017	-0.14055
2.02517	0.04565	2.02533	-0.1017	2.025	-0.00975	2.02533	-0.0779	2.025	-0.1304	2.02517	0.14225	2.02533	-0.7089	2.02533	-0.14025
2.0335	0.04395	2.03367	-0.1013	2.03333	-0.00995	2.03367	-0.07875	2.03333	-0.13195	2.0335	0.14075	2.03367	-0.70825	2.03367	-0.1406
2.04183	0.036	2.042	-0.10895	2.04167	-0.0185	2.042	-0.0867	2.04167	-0.1391	2.04183	0.13265	2.042	-0.7082	2.042	-0.14835
2.05017	0.0122	2.05033	-0.1341	2.05	-0.04195	2.05033	-0.11025	2.05	-0.16205	2.05017	0.1086	2.05033	-0.70735	2.05033	-0.17075
2.0585	-0.0426	2.05867	-0.18725	2.05833	-0.09795	2.05867	-0.165	2.05833	-0.2177	2.0585	0.05415	2.05867	-0.7088	2.05867	-0.2278
2.06683	-0.13705	2.067	-0.2825	2.06667	-0.19825	2.067	-0.26135	2.06667	-0.31265	2.06683	-0.0463	2.067	-0.70835	2.067	-0.32805
2.07517	-0.26955	2.07533	-0.4122	2.075	-0.33625	2.07533	-0.39735	2.075	-0.44715	2.07517	-0.18545	2.07533	-0.7119	2.07533	-0.4667
2.0835	-0.4152	2.08367	-0.5534	2.08333	-0.48555	2.08367	-0.5498	2.08333	-0.59525	2.0835	-0.3314	2.08367	-0.7311	2.08367	-0.6095
2.09183	-0.52825	2.092	-0.66785	2.09167	-0.5898	2.092	-0.68355	2.09167	-0.7204	2.09183	-0.4323	2.092	-0.77845	2.092	-0.7051
2.10017	-0.5552	2.10033	-0.70395	2.1	-0.5871	2.10033	-0.74495	2.1	-0.7706	2.10017	-0.4217	2.10033	-0.8583	2.10033	-0.68605
2.1085	-0.4558	2.10867	-0.6206	2.10833	-0.44795	2.10867	-0.6904	2.10833	-0.7046	2.1085	-0.27535	2.10867	-0.9441	2.10867	-0.5262
2.11683	-0.22765	2.117	-0.4108	2.11667	-0.195	2.117	-0.5139	2.11667	-0.518	2.11683	-0.02055	2.117	-0.99615	2.117	-0.24805
2.12517	0.07975	2.12533	-0.11735	2.125	0.10095	2.12533	-0.24255	2.125	-0.2465	2.12517	0.27475	2.12533	-0.9697	2.12533	0.07545
2.1335	0.37685	2.13367	0.1638	2.13333	0.35325	2.13367	0.05035	2.13333	0.0308	2.1335	0.5199	2.13367	-0.8618	2.13367	0.3514
2.14183	0.5751	2.142	0.343	2.14167	0.5051	2.142	0.29345	2.14167	0.2429	2.14183	0.6696	2.142	-0.6863	2.142	0.5058
2.15017	0.62775	2.15033	0.38645	2.15	0.5523	2.15033	0.44895	2.15	0.3598	2.15017	0.72695	2.15033	-0.48055	2.15033	0.5406
2.1585	0.5262	2.15867	0.3205	2.15833	0.52155	2.15867	0.51075	2.15833	0.37585	2.1585	0.72615	2.15867	-0.26665	2.15867	0.49825
2.16683	0.3033	2.167	0.18775	2.16667	0.4491	2.167	0.4898	2.16667	0.31685	2.16683	0.6993	2.167	-0.02	2.167	0.42765
2.17517	-0.0062	2.17533	0.01385	2.175	0.3982	2.17533	0.40485	2.175	0.202	2.17517	0.6469	2.17533	0.3073	2.17533	0.4319
2.1835	-0.3737	2.18367	-0.2033	2.18333	0.56085	2.18367	0.28255	2.18333	0.0446	2.1835	0.56115	2.18367	0.8041	2.18367	0.8474
2.19183	-0.74135	2.192	-0.43435	2.19167	1.3947	2.192	0.20805	2.19167	-0.0896	2.19183	0.4805	2.192	1.66985	2.192	2.47845
2.20017	-1.00555	2.20033	-0.57395	2.2	3.5537	2.20033	0.34185	2.2	-0.0718	2.20017	0.48685	2.20033	3.39645	2.20033	6.50095
2.2085	-1.04375	2.20867	-0.4136	2.20833	7.57725	2.20867	0.87925	2.20833	0.27305	2.2085	0.6738	2.20867	6.7517	2.20867	13.8799
2.21683	-0.75785	2.217	0.2946	2.21667	13.4733	2.217	1.9706	2.21667	1.0908	2.21683	1.09245	2.217	12.4169	2.217	24.5909
2.22517	-0.1368	2.22533	1.6775	2.225	20.5639	2.22533	3.63395	2.225	2.4014	2.22517	1.71055	2.22533	20.4526	2.22533	37.1413
2.2335	0.7427	2.23367	3.58775	2.23333	27.7616	2.23367	5.72345	2.23333	4.06645	2.2335	2.4346	2.23367	30.0139	2.23367	48.9301
2.24183	1.73135	2.242	5.5665	2.24167	33.9657	2.242	7.98595	2.24167	5.831	2.24183	3.1404	2.242	39.6505	2.242	57.5684
2.25017	2.67135	2.25033	7.03695	2.25	38.4365	2.25033	10.1588	2.25	7.42425	2.25017	3.72225	2.25033	47.8973	2.25033	62.0309
2.2585	3.43915	2.25867	7.6695	2.25833	40.8814	2.25867	12.042	2.25833	8.6343	2.2585	4.116	2.25867	53.7837	2.25867	62.6225
2.26683	3.964	2.267	7.54815	2.26667	41.3934	2.267	13.5129	2.26667	9.3578	2.26683	4.30245	2.267	56.9716	2.267	60.3897
2.27517	4.23575	2.27533	7.0007	2.275	40.2934	2.27533	14.5223	2.275	9.5961	2.27517	4.30235	2.27533	57.6405	2.27533	56.3958
2.2835	4.2799	2.28367	6.31795	2.28333	38.0098	2.28367	15.0622	2.28333	9.4221	2.2835	4.1583	2.28367	56.2404	2.28367	51.4378
2.29183	4.14485	2.292	5.64115	2.29167	34.9549	2.292	15.1531	2.29167	8.94295	2.29183	3.91135	2.292	53.3223	2.292	46.0778
2.30017	3.88655	2.30033	4.9929	2.3	31.4972	2.30033	14.8525	2.3	8.2644	2.30017	3.61015	2.30033	49.3978	2.30033	40.6654
2.3085	3.5566	2.30867	4.36825	2.30833	27.9123	2.30867	14.2308	2.30833	7.4792	2.3085	3.2835	2.30867	44.9109	2.30867	35.4464
2.31683	3.19345	2.317	3.7748	2.31667	24.4077	2.317	13.3697	2.31667	6.661	2.31683	2.9613	2.317	40.2114	2.317	30.5954
2.32517	2.8268	2.32533	3.22745	2.325	21.1176	2.32533	12.3546	2.325	5.86025	2.32517	2.6556	2.32533	35.5658	2.32533	26.2136
2.3335	2.475	2.33367	2.7383	2.33333	18.1254	2.33367	11.2644	2.33333	5.11225	2.3335	2.37825	2.33367	31.1552	2.33367	22.3392
2.34183	2.15185	2.342	2.31515	2.34167	15.4663	2.342	10.1585	2.34167	4.4341	2.34183	2.13165	2.342	27.0921	2.342	18.9831
2.35017	1.866	2.35033	1.96245	2.35	13.1623	2.35033	9.08695	2.35	3.8387	2.35017	1.92175	2.35033	23.4304	2.35033	16.127
2.3585	1.61935	2.35867	1.6693	2.35833	11.1951	2.35867	8.07745	2.35833	3.32385	2.3585	1.7414	2.35867	20.1964	2.35867	13.7241
2.36683	1.40575	2.367	1.4255	2.36667	9.5405	2.367	7.1593	2.36667	2.8842	2.36683	1.5885	2.367	17.3754	2.367	11.7225
2.37517	1.2282	2.37533	1.2276	2.375	8.16105	2.37533	6.3617	2.375	2.51435	2.37517	1.4619	2.37533	14.956	2.37533	10.0633
2.3835	1.07695	2.38367	1.0631	2.38333	7.01445	2.38367	5.7137	2.38333	2.2013	2.3835	1.35	2.38367	12.8955	2.38367	8.6821
2.39183	0.9527	2.392	0.9282	2.39167	6.06245	2.392	5.2496	2.39167	1.9398	2.39183	1.25735	2.392	11.1546	2.392	7.53345
2.40017	0.85085	2.40033	0.8186	2.4	5.27125	2.40033	4.98325	2.4	1.72275	2.40017	1.17845	2.40033	9.68385	2.40033	6.57045
2.4085	0.7644	2.40867	0.72365	2.40833	4.60575	2.40867	4.8957	2.40833	1.53655	2.4085	1.10695	2.40867	8.44045	2.40867	5.75885
2.41683	0.69	2.417	0.64105	2.41667	4.0453	2.417	4.94105	2.41667	1.37635	2.41683	1.0435	2.417	7.3884	2.417	5.06985
2.42517	0.62655	2.42533	0.5733	2.425	3.57435	2.42533	5.0542	2.425	1.2419	2.42517	0.98885	2.42533	6.49445	2.42533	4.48815
2.4335	0.5749	2.43367	0.51255	2.43333	3.1751	2.43367	5.1589	2.43333	1.12555	2.4335	0.9385	2.43367	5.7312	2.43367	3.9902
2.44183	0.531	2.442	0.46315	2.44167	2.8371	2.442	5.20505	2.44167	1.0234	2.44183	0.89245	2.442	5.07905	2.442	3.5642
2.45017	0.4938	2.45033	0.4196	2.45	2.54975	2.45033	5.1617	2.45	0.9376	2.45017	0.8544	2.45033	4.5192	2.45033	3.2056
2.4585	0.46115	2.45867	0.38215	2.45833	2.3055	2.45867	5.03315	2.45833	0.8609	2.4585	0.81735	2.45867	4.0353	2.45867	2.903
2.46683	0.4327	2.467	0.34865	2.46667	2.10025	2.467	4.849	2.46667	0.79505	2.46683	0.78285	2.467	3.61915	2.467	2.64795
2.47517	0.40925	2.47533	0.31955	2.475	1.92515	2.47533	4.6764	2.475	0.73865	2.47517	0.75235	2.47533	3.257	2.47533	2.43875
2.4835	0.3888	2.48367	0.2944	2.48333	1.77835	2.48367	4.5864	2.48333	0.69055	2.4835	0.72495	2.48367	2.94265	2.48367	2.2634
2.49183	0.3724	2.492	0.2715	2.49167	1.6537	2.492	4.6446	2.49167	0.64855	2.49183	0.6973	2.492	2.6685	2.492	2.1143
2.50017	0.35805	2.50033	0.25215	2.5	1.5484	2.50033	4.8816	2.5	0.6114	2.50017	0.6745	2.50033	2.4318	2.50033	1.98545
2.5085	0.3444	2.50867	0.2348	2.50833	1.45885	2.50867	5.26825	2.50833	0.57895	2.5085	0.65335	2.50867	2.22265	2.50867	1.87175
2.51683	0.3317	2.517	0.22	2.51667	1.38165	2.517	5.7323	2.51667	0.5511	2.51683	0.6321	2.517	2.04565	2.517	1.76945
2.52517	0.32365	2.52533	0.2063	2.525	1.3133	2.52533	6.17845	2.525	0.52675	2.52517	0.61745	2.52533	1.8912	2.52533	1.67885
2.5335	0.3167	2.53367	0.1948	2.53333	1.2527	2.53367	6.5174	2.53333	0.50995	2.5335	0.603	2.53367	1.752	2.53367	1.59795
2.54183	0.31655	2.542	0.1865	2.54167	1.2018	2.542	6.69625	2.54167	0.5012	2.54183	0.5967	2.542	1.63175	2.542	1.52365
2.55017	0.31925	2.55033	0.17965	2.55	1.1527	2.55033	6.70035	2.55	0.4986	2.55017	0.58995	2.55033	1.5228	2.55033	1.45685
2.5585	0.32245	2.55867	0.17715	2.55833	1.1068	2.55867	6.5441	2.55833	0.50405	2.5585	0.5878	2.55867	1.4231	2.55867	1.39375
2.56683	0.33145	2.567	0.17385	2.56667	1.06155	2.567	6.2648	2.56667	0.5094	2.56683	0.58235	2.567	1.32895	2.567	1.3339
2.57517	0.3363	2.57533	0.17165	2.575	1.01715	2.57533	5.9031	2.575	0.5152	2.57517	0.57775	2.57533	1.2407	2.57533	1.27575
2.5835	0.34015	2.58367	0.1694	2.58333	0.9752	2.58367	5.49545	2.58333	0.5186	2.5835	0.57185	2.58367	1.15785	2.58367	1.2209
2.59183	0.3421	2.592	0.1628	2.59167	0.93365	2.592	5.0687	2.59167	0.51785	2.59183	0.564	2.592	1.08135	2.592	1.1691
2.60017	0.33665	2.60033	0.15255	2.6	0.89135	2.60033	4.63925	2.6	0.5066	2.60017	0.55315	2.60033	1.0121	2.60033	1.1143
2.6085	0.3277	2.60867	0.1408	2.60833	0.84825	2.60867	4.2187	2.60833	0.4909	2.6085	0.53855	2.60867	0.94255	2.60867	1.06175
2.61683	0.31685	2.617	0.12865	2.61667	0.8092	2.617	3.82065	2.61667	0.47155	2.61683	0.52475	2.617	0.8805	2.617	1.01085
2.62517	0.30655	2.62533	0.12055	2.625	0.77235	2.62533	3.4468	2.625	0.4496	2.62517	0.51185	2.62533	0.8234	2.62533	0.9588
2.6335	0.29305	2.63367	0.1131	2.63333	0.7374	2.63367	3.1017	2.63333	0.42335	2.6335	0.4991	2.63367	0.769	2.63367	0.9089
2.64183	0.27925	2.642	0.10435	2.64167	0.7035	2.642	2.79185	2.64167	0.39845	2.64183	0.48575	2.642	0.7241	2.642	0.86315
2.65017	0.26685	2.65033	0.1013	2.65	0.6748	2.65033	2.51675	2.65	0.37795	2.65017	0.4776	2.65033	0.68305	2.65033	0.81815
2.6585	0.25475	2.65867	0.09395	2.65833	0.6445	2.65867	2.27085	2.65833	0.3539	2.6585	0.46665	2.65867	0.6491	2.65867	0.77455
2.66683	0.24355	2.667	0.08785	2.66667	0.61905	2.667	2.06225	2.66667	0.33425	2.66683	0.4578	2.667	0.61995	2.667	0.73495
2.67517	0.2326	2.67533	0.081	2.675	0.59195	2.67533	1.88045	2.675	0.3157	2.67517	0.4499	2.67533	0.5975	2.67533	0.69715
2.6835	0.2246	2.68367	0.0804	2.68333	0.57325	2.68367	1.7326	2.68333	0.302	2.6835	0.4486	2.68367	0.5762	2.68367	0.66425
2.69183	0.21705	2.692	0.0784	2.69167	0.55485	2.692	1.60805	2.69167	0.2883	2.69183	0.446	2.692	0.5581	2.692	0.63265
2.70017	0.21195	2.70033	0.084	2.7	0.5406	2.70033	1.51005	2.7	0.2785	2.70017	0.4503	2.70033	0.5351	2.70033	0.6052
2.7085	0.2082	2.70867	0.09515	2.70833	0.52995	2.70867	1.43195	2.70833	0.2734	2.7085	0.4582	2.70867	0.513	2.70867	0.5797
2.71683	0.2055	2.717	0.1087	2.71667	0.52025	2.717	1.36665	2.71667	0.2678	2.71683	0.46765	2.717	0.48855	2.717	0.55435
2.72517	0.2054	2.72533	0.1295	2.725	0.51585	2.72533	1.31595	2.725	0.2632	2.72517	0.4789	2.72533	0.45995	2.72533	0.53345
2.7335	0.207	2.73367	0.15045	2.73333	0.51205	2.73367	1.27	2.73333	0.26215	2.7335	0.49135	2.73367	0.435	2.73367	0.51455
2.74183	0.2082	2.742	0.172	2.74167	0.5086	2.742	1.23095	2.74167	0.25915	2.74183	0.50165	2.742	0.41025	2.742	0.4998
2.75017	0.2076	2.75033	0.18125	2.75	0.5049	2.75033	1.1936	2.75	0.25585	2.75017	0.50975	2.75033	0.3912	2.75033	0.4854
2.7585	0.2077	2.75867	0.1833	2.75833	0.50235	2.75867	1.1583	2.75833	0.2536	2.7585	0.5164	2.75867	0.37995	2.75867	0.4741
2.76683	0.2059	2.767	0.1803	2.76667	0.503	2.767	1.1258	2.76667	0.2538	2.76683	0.525	2.767	0.3767	2.767	0.46745
2.77517	0.20805	2.77533	0.174	2.775	0.50565	2.77533	1.09725	2.775	0.25925	2.77517	0.53325	2.77533	0.36995	2.77533	0.4647
2.7835	0.21015	2.78367	0.1698	2.78333	0.51325	2.78367	1.0743	2.78333	0.2672	2.7835	0.54515	2.78367	0.36645	2.78367	0.46705
2.79183	0.2095	2.792	0.16355	2.79167	0.51995	2.792	1.0543	2.79167	0.2772	2.79183	0.5546	2.792	0.366	2.792	0.46915
2.80017	0.20925	2.80033	0.1622	2.8	0.531	2.80033	1.04055	2.8	0.2925	2.80017	0.56795	2.80033	0.36625	2.80033	0.47635
2.8085	0.21205	2.80867	0.1617	2.80833	0.5452	2.80867	1.03155	2.80833	0.30885	2.8085	0.5827	2.80867	0.37285	2.80867	0.48215
2.81683	0.21135	2.817	0.1618	2.81667	0.5561	2.817	1.02445	2.81667	0.32615	2.81683	0.59385	2.817	0.3761	2.817	0.48655
2.82517	0.21465	2.82533	0.1628	2.825	0.5687	2.82533	1.02265	2.825	0.34315	2.82517	0.60605	2.82533	0.37655	2.82533	0.4938
2.8335	0.21565	2.83367	0.1631	2.83333	0.58005	2.83367	1.0215	2.83333	0.36035	2.8335	0.618	2.83367	0.37855	2.83367	0.4976
2.84183	0.21835	2.842	0.16505	2.84167	0.5896	2.842	1.0208	2.84167	0.37645	2.84183	0.6288	2.842	0.3792	2.842	0.5003
2.85017	0.2197	2.85033	0.16385	2.85	0.596	2.85033	1.01905	2.85	0.389	2.85017	0.63475	2.85033	0.37745	2.85033	0.503
2.8585	0.2208	2.85867	0.1643	2.85833	0.6014	2.85867	1.0198	2.85833	0.40005	2.8585	0.64245	2.85867	0.3778	2.85867	0.5047
2.86683	0.2207	2.867	0.164	2.86667	0.6049	2.867	1.01475	2.86667	0.4078	2.86683	0.6471	2.867	0.3827	2.867	0.5037
2.87517	0.2205	2.87533	0.16205	2.875	0.6038	2.87533	1.00795	2.875	0.4112	2.87517	0.64785	2.87533	0.38705	2.87533	0.5011
2.8835	0.2189	2.88367	0.1608	2.88333	0.6045	2.88367	1.00035	2.88333	0.4144	2.8835	0.6503	2.88367	0.3917	2.88367	0.498
2.89183	0.2175	2.892	0.161	2.89167	0.6048	2.892	0.9947	2.89167	0.4181	2.89183	0.6533	2.892	0.4015	2.892	0.49515
2.90017	0.2188	2.90033	0.15945	2.9	0.60495	2.90033	0.9871	2.9	0.4192	2.90017	0.65685	2.90033	0.4194	2.90033	0.4942
2.9085	0.2167	2.90867	0.1605	2.90833	0.60645	2.90867	0.98045	2.90833	0.4213	2.9085	0.663	2.90867	0.44095	2.90867	0.49425
2.91683	0.21685	2.917	0.16375	2.91667	0.61115	2.917	0.9748	2.91667	0.42495	2.91683	0.67485	2.917	0.46905	2.917	0.49725
2.92517	0.21785	2.92533	0.16555	2.925	0.6205	2.92533	0.97315	2.925	0.43235	2.92517	0.69385	2.92533	0.4974	2.92533	0.5064
2.9335	0.22095	2.93367	0.17325	2.93333	0.6384	2.93367	0.9787	2.93333	0.44525	2.9335	0.72445	2.93367	0.52455	2.93367	0.5269
2.94183	0.22125	2.942	0.1788	2.94167	0.66695	2.942	0.99135	2.94167	0.45785	2.94183	0.76865	2.942	0.53995	2.942	0.5579
2.95017	0.2249	2.95033	0.18705	2.95	0.7076	2.95033	1.01785	2.95	0.4822	2.95017	0.82905	2.95033	0.5449	2.95033	0.6055
2.9585	0.22665	2.95867	0.1939	2.95833	0.7589	2.95867	1.0601	2.95833	0.5149	2.9585	0.90365	2.95867	0.5362	2.95867	0.66605
2.96683	0.22835	2.967	0.19965	2.96667	0.8188	2.967	1.1147	2.96667	0.55425	2.96683	0.9827	2.967	0.5171	2.967	0.731
2.97517	0.22825	2.97533	0.20065	2.975	0.8738	2.97533	1.1785	2.975	0.59555	2.97517	1.0564	2.97533	0.4904	2.97533	0.7905
2.9835	0.22435	2.98367	0.2009	2.98333	0.92165	2.98367	1.2401	2.98333	0.6353	2.9835	1.1137	2.98367	0.4581	2.98367	0.83265
2.99183	0.2223	2.992	0.19935	2.99167	0.955	2.992	1.29535	2.99167	0.66825	2.99183	1.1522	2.992	0.4175	2.992	0.8561
3.00017	0.2184	3.00033	0.19745	3	0.96935	3.00033	1.33395	3	0.69155	3.00017	1.16675	3.00033	0.38255	3.00033	0.8553
3.0085	0.2158	3.00867	0.19585	3.00833	0.9659	3.00867	1.354	3.00833	0.70355	3.0085	1.15955	3.00867	0.34785	3.00867	0.84145
3.01683	0.21065	3.017	0.1936	3.01667	0.9494	3.017	1.35515	3.01667	0.7024	3.01683	1.13625	3.017	0.3151	3.017	0.8135
3.02517	0.20535	3.02533	0.19175	3.025	0.9243	3.02533	1.34435	3.025	0.69225	3.02517	1.10155	3.02533	0.28415	3.02533	0.78025
3.0335	0.20045	3.03367	0.19115	3.03333	0.8914	3.03367	1.31995	3.03333	0.6767	3.0335	1.0588	3.03367	0.2596	3.03367	0.7443
3.04183	0.19855	3.042	0.1905	3.04167	0.8577	3.042	1.28945	3.04167	0.6564	3.04183	1.0164	3.042	0.23575	3.042	0.70835
3.05017	0.19315	3.05033	0.1881	3.05	0.82	3.05033	1.253	3.05	0.6314	3.05017	0.97105	3.05033	0.2148	3.05033	0.6718
3.0585	0.19095	3.05867	0.18825	3.05833	0.7875	3.05867	1.21755	3.05833	0.6097	3.0585	0.9289	3.05867	0.1968	3.05867	0.6389
3.06683	0.18765	3.067	0.18765	3.06667	0.7555	3.067	1.1803	3.06667	0.58465	3.06683	0.88895	3.067	0.1754	3.067	0.60905
3.07517	0.1827	3.07533	0.18845	3.075	0.7263	3.07533	1.144	3.075	0.5621	3.07517	0.85265	3.07533	0.15705	3.07533	0.5826
3.0835	0.18215	3.08367	0.1889	3.08333	0.70155	3.08367	1.11405	3.08333	0.54375	3.0835	0.82195	3.08367	0.13845	3.08367	0.5583
3.09183	0.1807	3.092	0.19235	3.09167	0.6786	3.092	1.08675	3.09167	0.52705	3.09183	0.79435	3.092	0.1163	3.092	0.5377
3.10017	0.179	3.10033	0.19465	3.1	0.65825	3.10033	1.06185	3.1	0.5124	3.10017	0.7686	3.10033	0.09275	3.10033	0.5196
3.1085	0.17695	3.10867	0.19955	3.10833	0.6422	3.10867	1.0416	3.10833	0.50125	3.1085	0.74765	3.10867	0.0718	3.10867	0.505
3.11683	0.17275	3.117	0.206	3.11667	0.62625	3.117	1.0215	3.11667	0.4909	3.11683	0.7292	3.117	0.0489	3.117	0.49045
3.12517	0.1712	3.12533	0.21065	3.125	0.61235	3.12533	1.0051	3.125	0.48325	3.12517	0.71245	3.12533	0.0276	3.12533	0.4764
3.1335	0.1643	3.13367	0.2108	3.13333	0.5958	3.13367	0.98855	3.13333	0.47055	3.1335	0.69215	3.13367	0.00945	3.13367	0.46145
3.14183	0.163	3.142	0.21785	3.14167	0.5822	3.142	0.9749	3.14167	0.4629	3.14183	0.67815	3.142	-0.00635	3.142	0.4484
3.15017	0.16205	3.15033	0.2211	3.15	0.5675	3.15033	0.96095	3.15	0.45515	3.15017	0.66455	3.15033	-0.02325	3.15033	0.437
3.1585	0.15785	3.15867	0.22025	3.15833	0.55275	3.15867	0.94475	3.15833	0.44335	3.1585	0.6507	3.15867	-0.0379	3.15867	0.42305
3.16683	0.1559	3.167	0.2185	3.16667	0.53595	3.167	0.9298	3.16667	0.4311	3.16683	0.63535	3.167	-0.04725	3.167	0.4105
3.17517	0.1527	3.17533	0.21325	3.175	0.52335	3.17533	0.9143	3.175	0.4178	3.17517	0.62305	3.17533	-0.0587	3.17533	0.3974
3.1835	0.14995	3.18367	0.2061	3.18333	0.5086	3.18367	0.9006	3.18333	0.4057	3.1835	0.6103	3.18367	-0.0714	3.18367	0.38485
3.19183	0.1467	3.192	0.1986	3.19167	0.4962	3.192	0.88945	3.19167	0.39385	3.19183	0.59775	3.192	-0.0811	3.192	0.375
3.20017	0.1461	3.20033	0.1894	3.2	0.4835	3.20033	0.87755	3.2	0.3808	3.20017	0.58655	3.20033	-0.08925	3.20033	0.36905
3.2085	0.1437	3.20867	0.1807	3.20833	0.4748	3.20867	0.8682	3.20833	0.37065	3.2085	0.5784	3.20867	-0.09765	3.20867	0.36405
3.21683	0.1436	3.217	0.17495	3.21667	0.4678	3.217	0.86365	3.21667	0.36315	3.21683	0.57215	3.217	-0.10555	3.217	0.3675
3.22517	0.14245	3.22533	0.16685	3.225	0.45945	3.22533	0.861	3.225	0.35335	3.22517	0.5657	3.22533	-0.111	3.22533	0.3847
3.2335	0.14155	3.23367	0.1608	3.23333	0.45205	3.23367	0.8673	3.23333	0.3461	3.2335	0.56015	3.23367	-0.1117	3.23367	0.4249
3.24183	0.1408	3.242	0.1553	3.24167	0.44845	3.242	0.88725	3.24167	0.3408	3.24183	0.55705	3.242	-0.1141	3.242	0.5012
3.25017	0.14165	3.25033	0.15235	3.25	0.44595	3.25033	0.92425	3.25	0.33805	3.25017	0.55485	3.25033	-0.1149	3.25033	0.61525
3.2585	0.14185	3.25867	0.14905	3.25833	0.4431	3.25867	0.98265	3.25833	0.3338	3.2585	0.5552	3.25867	-0.1094	3.25867	0.76075
3.26683	0.14155	3.267	0.1469	3.26667	0.44295	3.267	1.0641	3.26667	0.33295	3.26683	0.5552	3.267	-0.10235	3.267	0.91595
3.27517	0.14285	3.27533	0.14525	3.275	0.4416	3.27533	1.1595	3.275	0.33395	3.27517	0.55565	3.27533	-0.0852	3.27533	1.05505
3.2835	0.14165	3.28367	0.14435	3.28333	0.4403	3.28367	1.25605	3.28333	0.33465	3.2835	0.55645	3.28367	-0.0635	3.28367	1.15915
3.29183	0.14335	3.292	0.14305	3.29167	0.44	3.292	1.3424	3.29167	0.3355	3.29183	0.5563	3.292	-0.04605	3.292	1.217
3.30017	0.14385	3.30033	0.1409	3.3	0.4399	3.30033	1.40775	3.3	0.3353	3.30017	0.55485	3.30033	-0.0233	3.30033	1.2267
3.3085	0.1438	3.30867	0.139	3.30833	0.43765	3.30867	1.44545	3.30833	0.33685	3.3085	0.5549	3.30867	-0.0026	3.30867	1.2035
3.31683	0.1457	3.317	0.13815	3.31667	0.4368	3.317	1.4587	3.31667	0.3383	3.31683	0.5525	3.317	0.01595	3.317	1.1544
3.32517	0.14555	3.32533	0.13635	3.325	0.43435	3.32533	1.4464	3.325	0.33695	3.32517	0.55155	3.32533	0.03	3.32533	1.09015
3.3335	0.1455	3.33367	0.13715	3.33333	0.43155	3.33367	1.41845	3.33333	0.3364	3.3335	0.55095	3.33367	0.0427	3.33367	1.01895
3.34183	0.14775	3.342	0.1366	3.34167	0.43105	3.342	1.38285	3.34167	0.33715	3.34183	0.5515	3.342	0.05365	3.342	0.94575
3.35017	0.14925	3.35033	0.1388	3.35	0.4297	3.35033	1.3389	3.35	0.33535	3.35017	0.5504	3.35033	0.0579	3.35033	0.87235
3.3585	0.1537	3.35867	0.1463	3.35833	0.4302	3.35867	1.2968	3.35833	0.33845	3.3585	0.55345	3.35867	0.0636	3.35867	0.80855
3.36683	0.1562	3.367	0.14985	3.36667	0.43145	3.367	1.25655	3.36667	0.33865	3.36683	0.55675	3.367	0.06805	3.367	0.74505
3.37517	0.16	3.37533	0.1596	3.375	0.4329	3.37533	1.2212	3.375	0.34045	3.37517	0.55985	3.37533	0.07125	3.37533	0.6883
3.3835	0.1659	3.38367	0.1676	3.38333	0.43635	3.38367	1.1892	3.38333	0.3415	3.3835	0.5617	3.38367	0.06585	3.38367	0.63735
3.39183	0.16965	3.392	0.17655	3.39167	0.4379	3.392	1.16075	3.39167	0.3427	3.39183	0.56365	3.392	0.0693	3.392	0.59105
3.40017	0.1732	3.40033	0.18255	3.4	0.44015	3.40033	1.1357	3.4	0.3434	3.40017	0.5642	3.40033	0.0686	3.40033	0.5497
3.4085	0.17895	3.40867	0.19135	3.40833	0.4397	3.40867	1.115	3.40833	0.34385	3.4085	0.5662	3.40867	0.0695	3.40867	0.5149
3.41683	0.18465	3.417	0.19605	3.41667	0.43965	3.417	1.0941	3.41667	0.3435	3.41683	0.5662	3.417	0.06605	3.417	0.4851
3.42517	0.18725	3.42533	0.20095	3.425	0.44	3.42533	1.0767	3.425	0.3423	3.42517	0.56495	3.42533	0.06735	3.42533	0.46115
3.4335	0.18855	3.43367	0.20255	3.43333	0.43825	3.43367	1.0576	3.43333	0.33905	3.4335	0.5602	3.43367	0.07335	3.43367	0.43815
3.44183	0.19125	3.442	0.2041	3.44167	0.4351	3.442	1.04075	3.44167	0.33655	3.44183	0.55645	3.442	0.09045	3.442	0.4198
3.45017	0.1915	3.45033	0.20525	3.45	0.432	3.45033	1.02595	3.45	0.3321	3.45017	0.5531	3.45033	-0.03695	3.45033	0.40325
3.4585	0.1938	3.45867	0.20735	3.45833	0.4309	3.45867	1.0136	3.45833	0.32995	3.4585	0.55045	3.45867	-0.0229	3.45867	0.39355
3.46683	0.1917	3.467	0.2064	3.46667	0.42365	3.467	0.99895	3.46667	0.3257	3.46683	0.5475	3.467	0.06345	3.467	0.3809
3.47517	0.19165	3.47533	0.2058	3.475	0.42165	3.47533	0.98845	3.475	0.3208	3.47517	0.5442	3.47533	0.05315	3.47533	0.36765
3.4835	0.1912	3.48367	0.20435	3.48333	0.4202	3.48367	0.97805	3.48333	0.3162	3.4835	0.54065	3.48367	0.04795	3.48367	0.35695
3.49183	0.1905	3.492	0.2067	3.49167	0.41765	3.492	0.96895	3.49167	0.31465	3.49183	0.5401	3.492	0.0428	3.492	0.34665
3.50017	0.1923	3.50033	0.20575	3.5	0.415	3.50033	0.9608	3.5	0.3109	3.50017	0.537	3.50033	0.0402	3.50033	0.33505
3.5085	0.1907	3.50867	0.2054	3.50833	0.4123	3.50867	0.9536	3.50833	0.30705	3.5085	0.53305	3.50867	0.037	3.50867	0.32495
3.51683	0.19245	3.517	0.2063	3.51667	0.4106	3.517	0.94685	3.51667	0.3054	3.51683	0.53405	3.517	0.03385	3.517	0.3171
3.52517	0.19315	3.52533	0.2072	3.525	0.40925	3.52533	0.9404	3.525	0.30405	3.52517	0.5304	3.52533	0.0343	3.52533	0.309
3.5335	0.1961	3.53367	0.2075	3.53333	0.40715	3.53367	0.93675	3.53333	0.305	3.5335	0.53	3.53367	0.0321	3.53367	0.30445
3.54183	0.19425	3.542	0.20585	3.54167	0.403	3.542	0.9295	3.54167	0.30005	3.54183	0.52625	3.542	0.034	3.542	0.29615
3.55017	0.1963	3.55033	0.20505	3.55	0.39885	3.55033	0.92235	3.55	0.29765	3.55017	0.52405	3.55033	0.03475	3.55033	0.28925
3.5585	0.19595	3.55867	0.2031	3.55833	0.39635	3.55867	0.9167	3.55833	0.29625	3.5585	0.52335	3.55867	0.03485	3.55867	0.2815
3.56683	0.1965	3.567	0.20425	3.56667	0.3955	3.567	0.91225	3.56667	0.29145	3.56683	0.5209	3.567	0.03345	3.567	0.2765
3.57517	0.19605	3.57533	0.2023	3.575	0.3949	3.57533	0.9097	3.575	0.2898	3.57517	0.51795	3.57533	0.031	3.57533	0.2729
3.5835	0.1932	3.58367	0.2008	3.58333	0.3905	3.58367	0.9033	3.58333	0.28485	3.5835	0.51505	3.58367	0.032	3.58367	0.26655
3.59183	0.1913	3.592	0.1996	3.59167	0.38635	3.592	0.89865	3.59167	0.2812	3.59183	0.5118	3.592	0.02985	3.592	0.2615
3.60017	0.1939	3.60033	0.20085	3.6	0.38415	3.60033	0.8964	3.6	0.2794	3.60017	0.5102	3.60033	0.02815	3.60033	0.2564
3.6085	0.1935	3.60867	0.19825	3.60833	0.38165	3.60867	0.8912	3.60833	0.27815	3.6085	0.5076	3.60867	0.0237	3.60867	0.2516
3.61683	0.19395	3.617	0.1992	3.61667	0.37895	3.617	0.8879	3.61667	0.2768	3.61683	0.5064	3.617	0.02125	3.617	0.25095
3.62517	0.19515	3.62533	0.19905	3.625	0.377	3.62533	0.88385	3.625	0.27615	3.62517	0.5066	3.62533	0.0169	3.62533	0.25065
3.6335	0.19375	3.63367	0.1987	3.63333	0.377	3.63367	0.8828	3.63333	0.27475	3.6335	0.50615	3.63367	0.0135	3.63367	0.2507
3.64183	0.191	3.642	0.19695	3.64167	0.37395	3.642	0.881	3.64167	0.2724	3.64183	0.50575	3.642	0.0077	3.642	0.25035
3.65017	0.1893	3.65033	0.1968	3.65	0.3728	3.65033	0.8813	3.65	0.2719	3.65017	0.5054	3.65033	0.00675	3.65033	0.2526
3.6585	0.18835	3.65867	0.19595	3.65833	0.3705	3.65867	0.8825	3.65833	0.27075	3.6585	0.5064	3.65867	0.0084	3.65867	0.25655
3.66683	0.19025	3.667	0.19835	3.66667	0.37125	3.667	0.88915	3.66667	0.2745	3.66683	0.50935	3.667	-0.0008	3.667	0.26445
3.67517	0.18865	3.67533	0.19705	3.675	0.3689	3.67533	0.89135	3.675	0.2742	3.67517	0.50985	3.67533	-0.0032	3.67533	0.271
3.6835	0.18815	3.68367	0.19595	3.68333	0.36605	3.68367	0.89815	3.68333	0.2764	3.6835	0.51185	3.68367	-0.007	3.68367	0.27655
3.69183	0.1912	3.692	0.19735	3.69167	0.36705	3.692	0.9072	3.69167	0.2793	3.69183	0.51315	3.692	-0.00795	3.692	0.2856
3.70017	0.19055	3.70033	0.19565	3.7	0.3652	3.70033	0.91575	3.7	0.28185	3.70017	0.51415	3.70033	-0.00885	3.70033	0.28865
3.7085	0.1891	3.70867	0.19405	3.70833	0.3613	3.70867	0.92115	3.70833	0.2836	3.7085	0.5118	3.70867	-0.01275	3.70867	0.29105
3.71683	0.1902	3.717	0.194	3.71667	0.35985	3.717	0.9305	3.71667	0.2862	3.71683	0.51365	3.717	-0.0169	3.717	0.2927
3.72517	0.19015	3.72533	0.19145	3.725	0.35735	3.72533	0.93585	3.725	0.28575	3.72517	0.51325	3.72533	-0.0175	3.72533	0.29065
3.7335	0.1892	3.73367	0.1905	3.73333	0.3569	3.73367	0.94055	3.73333	0.28555	3.7335	0.512	3.73367	-0.0199	3.73367	0.28665
3.74183	0.1892	3.742	0.1909	3.74167	0.35525	3.742	0.9409	3.74167	0.28275	3.74183	0.5093	3.742	-0.0194	3.742	0.2797
3.75017	0.18815	3.75033	0.18895	3.75	0.3522	3.75033	0.94205	3.75	0.27905	3.75017	0.50655	3.75033	-0.0204	3.75033	0.2729
3.7585	0.18925	3.75867	0.18925	3.75833	0.35365	3.75867	0.94075	3.75833	0.27705	3.7585	0.50315	3.75867	-0.0241	3.75867	0.2662
3.76683	0.18995	3.767	0.1885	3.76667	0.3518	3.767	0.9388	3.76667	0.27425	3.76683	0.4997	3.767	-0.0247	3.767	0.2589
3.77517	0.1896	3.77533	0.1894	3.775	0.3501	3.77533	0.93675	3.775	0.27085	3.77517	0.4977	3.77533	-0.0264	3.77533	0.2515
3.7835	0.1882	3.78367	0.1891	3.78333	0.3506	3.78367	0.9338	3.78333	0.2684	3.7835	0.4954	3.78367	-0.0262	3.78367	0.24605
3.79183	0.1906	3.792	0.1894	3.79167	0.34795	3.792	0.92945	3.79167	0.2663	3.79183	0.49135	3.792	-0.03105	3.792	0.2392
3.80017	0.18825	3.80033	0.1891	3.8	0.34765	3.80033	0.92605	3.8	0.26405	3.80017	0.4892	3.80033	-0.0305	3.80033	0.23435
3.8085	0.18835	3.80867	0.18875	3.80833	0.3457	3.80867	0.9203	3.80833	0.2598	3.8085	0.48655	3.80867	-0.0312	3.80867	0.2271
3.81683	0.18965	3.817	0.1885	3.81667	0.34605	3.817	0.91355	3.81667	0.25805	3.81683	0.48395	3.817	-0.0334	3.817	0.2233
3.82517	0.18865	3.82533	0.18765	3.825	0.34615	3.82533	0.9078	3.825	0.25605	3.82517	0.4814	3.82533	-0.03555	3.82533	0.2193
3.8335	0.18745	3.83367	0.1876	3.83333	0.34495	3.83367	0.89875	3.83333	0.2529	3.8335	0.47975	3.83367	-0.03745	3.83367	0.2138
3.84183	0.1899	3.842	0.18825	3.84167	0.34405	3.842	0.892	3.84167	0.2525	3.84183	0.47895	3.842	-0.03835	3.842	0.21185
3.85017	0.18845	3.85033	0.18815	3.85	0.34275	3.85033	0.8844	3.85	0.25015	3.85017	0.47645	3.85033	-0.03935	3.85033	0.2082
3.8585	0.1881	3.85867	0.18585	3.85833	0.34195	3.85867	0.8774	3.85833	0.24835	3.8585	0.47525	3.85867	-0.0408	3.85867	0.2043
3.86683	0.18715	3.867	0.18805	3.86667	0.3404	3.867	0.8685	3.86667	0.2465	3.86683	0.4747	3.867	-0.0384	3.867	0.20225
3.87517	0.1873	3.87533	0.1857	3.875	0.33915	3.87533	0.86075	3.875	0.2447	3.87517	0.47165	3.87533	-0.04	3.87533	0.1985
3.8835	0.1868	3.88367	0.18555	3.88333	0.33855	3.88367	0.8529	3.88333	0.24275	3.8835	0.47025	3.88367	-0.04175	3.88367	0.1959
3.89183	0.1855	3.892	0.18445	3.89167	0.3376	3.892	0.84405	3.89167	0.2412	3.89183	0.4688	3.892	-0.0394	3.892	0.193
3.90017	0.1846	3.90033	0.18405	3.9	0.3344	3.90033	0.83765	3.9	0.23975	3.90017	0.4674	3.90033	-0.0409	3.90033	0.18945
3.9085	0.18665	3.90867	0.18555	3.90833	0.33485	3.90867	0.8324	3.90833	0.2397	3.9085	0.4684	3.90867	-0.0414	3.90867	0.188
3.91683	0.1854	3.917	0.1837	3.91667	0.33245	3.917	0.8264	3.91667	0.2367	3.91683	0.46735	3.917	-0.0416	3.917	0.18605
3.92517	0.18475	3.92533	0.18465	3.925	0.3318	3.92533	0.82105	3.925	0.23575	3.92517	0.4658	3.92533	-0.0417	3.92533	0.18355
3.9335	0.18345	3.93367	0.18325	3.93333	0.33015	3.93367	0.81525	3.93333	0.2351	3.9335	0.46465	3.93367	-0.04395	3.93367	0.1809
3.94183	0.18545	3.942	0.18365	3.94167	0.33045	3.942	0.81185	3.94167	0.23335	3.94183	0.4647	3.942	-0.0436	3.942	0.18035
3.95017	0.18505	3.95033	0.18195	3.95	0.32835	3.95033	0.8053	3.95	0.2325	3.95017	0.4624	3.95033	-0.04545	3.95033	0.17805
3.9585	0.18285	3.95867	0.18095	3.95833	0.3277	3.95867	0.80225	3.95833	0.2291	3.9585	0.4598	3.95867	-0.04765	3.95867	0.17485
3.96683	0.18375	3.967	0.18185	3.96667	0.32755	3.967	0.7987	3.96667	0.23275	3.96683	0.4585	3.967	-0.0486	3.967	0.1753
3.97517	0.18445	3.97533	0.1822	3.975	0.32745	3.97533	0.7959	3.975	0.23205	3.97517	0.45875	3.97533	-0.0519	3.97533	0.17555
3.9835	0.18395	3.98367	0.18145	3.98333	0.32515	3.98367	0.79265	3.98333	0.2301	3.9835	0.4578	3.98367	-0.0531	3.98367	0.175
3.99183	0.1848	3.992	0.18265	3.99167	0.3259	3.992	0.78985	3.99167	0.23165	3.99183	0.45805	3.992	-0.0525	3.992	0.1747
4.00017	0.18535	4.00033	0.18145	4	0.3258	4.00033	0.78625	4	0.232	4.00017	0.45825	4.00033	-0.0551	4.00033	0.17355
4.0085	0.1825	4.00867	0.1806	4.00833	0.3254	4.00867	0.78135	4.00833	0.23075	4.0085	0.4563	4.00867	-0.0558	4.00867	0.17185
4.01683	0.183	4.017	0.18055	4.01667	0.32455	4.017	0.7795	4.01667	0.2317	4.01683	0.4576	4.017	-0.05625	4.017	0.17175
4.02517	0.18105	4.02533	0.17945	4.025	0.32245	4.02533	0.7772	4.025	0.2303	4.02517	0.45665	4.02533	-0.0559	4.02533	0.1697
4.0335	0.1796	4.03367	0.17795	4.03333	0.3207	4.03367	0.77325	4.03333	0.2289	4.0335	0.45745	4.03367	-0.05805	4.03367	0.1668
4.04183	0.17975	4.042	0.17765	4.04167	0.3194	4.042	0.77275	4.04167	0.2295	4.04183	0.458	4.042	-0.05665	4.042	0.1677
4.05017	0.1798	4.05033	0.17935	4.05	0.32	4.05033	0.77075	4.05	0.2306	4.05017	0.4594	4.05033	-0.05855	4.05033	0.1667
4.0585	0.17855	4.05867	0.1781	4.05833	0.31675	4.05867	0.76885	4.05833	0.2294	4.0585	0.4597	4.05867	-0.0587	4.05867	0.1645
4.06683	0.17775	4.067	0.17425	4.06667	0.3152	4.067	0.77015	4.06667	0.22885	4.06683	0.45915	4.067	-0.05635	4.067	0.16455
4.07517	0.1791	4.07533	0.1779	4.075	0.31695	4.07533	0.7735	4.075	0.23125	4.07517	0.46225	4.07533	-0.0542	4.07533	0.16535
4.0835	0.1761	4.08367	0.17435	4.08333	0.31145	4.08367	0.7721	4.08333	0.229	4.0835	0.4594	4.08367	-0.05045	4.08367	0.1607
4.09183	0.1777	4.092	0.17465	4.09167	0.3101	4.092	0.77295	4.09167	0.22955	4.09183	0.46005	4.092	-0.04845	4.092	0.16235
4.10017	0.17825	4.10033	0.1744	4.1	0.3106	4.10033	0.776	4.1	0.2324	4.10017	0.4588	4.10033	-0.04315	4.10033	0.1619
4.1085	0.17715	4.10867	0.1744	4.10833	0.30725	4.10867	0.7757	4.10833	0.233	4.1085	0.45735	4.10867	-0.04015	4.10867	0.16115
4.11683	0.17575	4.117	0.17365	4.11667	0.30605	4.117	0.7756	4.11667	0.2315	4.11683	0.4553	4.117	-0.036	4.117	0.15745
4.12517	0.17525	4.12533	0.17215	4.125	0.3022	4.12533	0.77345	4.125	0.23005	4.12517	0.45235	4.12533	-0.039	4.12533	0.15645
4.1335	0.17605	4.13367	0.17025	4.13333	0.3011	4.13367	0.7719	4.13333	0.22825	4.1335	0.4504	4.13367	-0.03985	4.13367	0.15475
4.14183	0.17405	4.142	0.1706	4.14167	0.29955	4.142	0.76975	4.14167	0.2281	4.14183	0.44835	4.142	-0.03735	4.142	0.1528
4.15017	0.1748	4.15033	0.1706	4.15	0.30005	4.15033	0.76895	4.15	0.22655	4.15017	0.44705	4.15033	-0.04255	4.15033	0.15155
4.1585	0.1744	4.15867	0.1701	4.15833	0.29915	4.15867	0.76745	4.15833	0.22715	4.1585	0.44645	4.15867	-0.04215	4.15867	0.1508
4.16683	0.1751	4.167	0.17075	4.16667	0.301	4.167	0.7654	4.16667	0.2248	4.16683	0.44515	4.167	-0.04865	4.167	0.1492
4.17517	0.17635	4.17533	0.17165	4.175	0.3019	4.17533	0.765	4.175	0.2258	4.17517	0.44605	4.17533	-0.0534	4.17533	0.1496
4.1835	0.17675	4.18367	0.17185	4.18333	0.30225	4.18367	0.76295	4.18333	0.2239	4.1835	0.44715	4.18367	-0.05755	4.18367	0.14955
4.19183	0.17545	4.192	0.17085	4.19167	0.3021	4.192	0.75965	4.19167	0.2235	4.19183	0.4479	4.192	-0.0602	4.192	0.1481
4.20017	0.176	4.20033	0.16905	4.2	0.3036	4.20033	0.7589	4.2	0.2237	4.20017	0.4484	4.20033	-0.06165	4.20033	0.14935
4.2085	0.17425	4.20867	0.17145	4.20833	0.30635	4.20867	0.7577	4.20833	0.22305	4.2085	0.4492	4.20867	-0.0671	4.20867	0.1493
4.21683	0.17435	4.217	0.1729	4.21667	0.3065	4.217	0.7567	4.21667	0.2241	4.21683	0.45305	4.217	-0.07235	4.217	0.1497
4.22517	0.17445	4.22533	0.1731	4.225	0.30915	4.22533	0.7559	4.225	0.2244	4.22517	0.45655	4.22533	-0.0746	4.22533	0.1511
4.2335	0.1751	4.23367	0.1745	4.23333	0.31375	4.23367	0.7551	4.23333	0.22585	4.2335	0.4602	4.23367	-0.07955	4.23367	0.15225
4.24183	0.17615	4.242	0.17705	4.24167	0.3159	4.242	0.7547	4.24167	0.2284	4.24183	0.4649	4.242	-0.082	4.242	0.1539
4.25017	0.1803	4.25033	0.18085	4.25	0.32185	4.25033	0.75655	4.25	0.23395	4.25017	0.47085	4.25033	-0.0885	4.25033	0.15835
4.2585	0.1817	4.25867	0.184	4.25833	0.32535	4.25867	0.7569	4.25833	0.2342	4.2585	0.47425	4.25867	-0.0918	4.25867	0.1597
4.26683	0.18555	4.267	0.1871	4.26667	0.327	4.267	0.7581	4.26667	0.23915	4.26683	0.4774	4.267	-0.0968	4.267	0.16125
4.27517	0.19	4.27533	0.1886	4.275	0.3302	4.27533	0.76005	4.275	0.24275	4.27517	0.4793	4.27533	-0.1023	4.27533	0.1638
4.2835	0.1968	4.28367	0.19395	4.28333	0.334	4.28367	0.7646	4.28333	0.24935	4.2835	0.48245	4.28367	-0.0996	4.28367	0.16655
4.29183	0.2015	4.292	0.1957	4.29167	0.33595	4.292	0.76585	4.29167	0.25235	4.29183	0.48245	4.292	-0.09965	4.292	0.1678
4.30017	0.20485	4.30033	0.19515	4.3	0.33485	4.30033	0.7667	4.3	0.2552	4.30017	0.47975	4.30033	-0.0972	4.30033	0.1649
4.3085	0.21205	4.30867	0.1957	4.30833	0.33645	4.30867	0.7683	4.30833	0.25775	4.3085	0.4791	4.30867	-0.09285	4.30867	0.1662
4.31683	0.21345	4.317	0.1955	4.31667	0.33275	4.317	0.76795	4.31667	0.25705	4.31683	0.47575	4.317	-0.08405	4.317	0.16295
4.32517	0.2154	4.32533	0.19315	4.325	0.33155	4.32533	0.76485	4.325	0.25395	4.32517	0.47355	4.32533	-0.07815	4.32533	0.1613
4.3335	0.2173	4.33367	0.1934	4.33333	0.32935	4.33367	0.763	4.33333	0.2533	4.3335	0.4711	4.33367	-0.07175	4.33367	0.15985
4.34183	0.21745	4.342	0.1918	4.34167	0.32775	4.342	0.75985	4.34167	0.2506	4.34183	0.46635	4.342	-0.06365	4.342	0.15655
4.35017	0.21975	4.35033	0.19295	4.35	0.32705	4.35033	0.7578	4.35	0.24895	4.35017	0.4633	4.35033	-0.05855	4.35033	0.15665
4.3585	0.2204	4.35867	0.19165	4.35833	0.32405	4.35867	0.75355	4.35833	0.24625	4.3585	0.45775	4.35867	-0.05165	4.35867	0.15555
4.36683	0.21675	4.367	0.1895	4.36667	0.31925	4.367	0.7469	4.36667	0.2414	4.36683	0.4522	4.367	-0.0483	4.367	0.1518
4.37517	0.2153	4.37533	0.1873	4.375	0.317	4.37533	0.7414	4.375	0.23755	4.37517	0.44685	4.37533	-0.0465	4.37533	0.1473
4.3835	0.2145	4.38367	0.18565	4.38333	0.31425	4.38367	0.73795	4.38333	0.23385	4.3835	0.44245	4.38367	-0.0459	4.38367	0.1463
4.39183	0.211	4.392	0.1833	4.39167	0.31135	4.392	0.7325	4.39167	0.22995	4.39183	0.4357	4.392	-0.04495	4.392	0.14235
4.40017	0.2068	4.40033	0.18055	4.4	0.30705	4.40033	0.727	4.4	0.2266	4.40017	0.4306	4.40033	-0.04405	4.40033	0.13765
4.4085	0.20465	4.40867	0.17945	4.40833	0.30595	4.40867	0.7231	4.40833	0.2248	4.4085	0.42475	4.40867	-0.04685	4.40867	0.1325
4.41683	0.20055	4.417	0.17755	4.41667	0.30475	4.417	0.71965	4.41667	0.2207	4.41683	0.42275	4.417	-0.05115	4.417	0.12765
4.42517	0.19865	4.42533	0.17785	4.425	0.3048	4.42533	0.7147	4.425	0.2192	4.42517	0.42315	4.42533	-0.05155	4.42533	0.12245
4.4335	0.195	4.43367	0.1758	4.43333	0.30195	4.43367	0.70785	4.43333	0.2164	4.4335	0.42685	4.43367	-0.05545	4.43367	0.1184
4.44183	0.1925	4.442	0.17595	4.44167	0.302	4.442	0.7031	4.44167	0.2137	4.44183	0.42995	4.442	-0.0589	4.442	0.1154
4.45017	0.1907	4.45033	0.1756	4.45	0.3009	4.45033	0.698	4.45	0.21175	4.45017	0.4367	4.45033	-0.06455	4.45033	0.11715
4.4585	0.18665	4.45867	0.1764	4.45833	0.2992	4.45867	0.69255	4.45833	0.2089	4.4585	0.44245	4.45867	-0.06955	4.45867	0.11955
4.46683	0.18625	4.467	0.17765	4.46667	0.29885	4.467	0.6892	4.46667	0.2095	4.46683	0.45055	4.467	-0.07305	4.467	0.1263
4.47517	0.18625	4.47533	0.1802	4.475	0.29975	4.47533	0.6885	4.475	0.2093	4.47517	0.457	4.47533	-0.0808	4.47533	0.13505
4.4835	0.1849	4.48367	0.17945	4.48333	0.2983	4.48367	0.68915	4.48333	0.20925	4.4835	0.45935	4.48367	-0.08515	4.48367	0.14125
4.49183	0.1821	4.492	0.17925	4.49167	0.29805	4.492	0.69225	4.49167	0.2103	4.49183	0.46195	4.492	-0.08905	4.492	0.14905
4.50017	0.1821	4.50033	0.17915	4.5	0.2977	4.50033	0.6982	4.5	0.21005	4.50017	0.464	4.50033	-0.09125	4.50033	0.1549
4.5085	0.18055	4.50867	0.17805	4.50833	0.2958	4.50867	0.70255	4.50833	0.2104	4.5085	0.46265	4.50867	-0.09685	4.50867	0.15855
4.51683	0.18115	4.517	0.17895	4.51667	0.29405	4.517	0.70985	4.51667	0.2103	4.51683	0.4632	4.517	-0.0956	4.517	0.16125
4.52517	0.1762	4.52533	0.1782	4.525	0.2923	4.52533	0.71515	4.525	0.21135	4.52517	0.46065	4.52533	-0.1015	4.52533	0.16175
4.5335	0.1774	4.53367	0.1773	4.53333	0.29295	4.53367	0.7219	4.53333	0.2126	4.5335	0.45945	4.53367	-0.1048	4.53367	0.1638
4.54183	0.1776	4.542	0.17655	4.54167	0.2908	4.542	0.72375	4.54167	0.21435	4.54183	0.4576	4.542	-0.1067	4.542	0.16385
4.55017	0.1778	4.55033	0.17645	4.55	0.291	4.55033	0.7272	4.55	0.21395	4.55017	0.4553	4.55033	-0.1107	4.55033	0.1631
4.5585	0.17665	4.55867	0.1764	4.55833	0.28985	4.55867	0.7283	4.55833	0.21605	4.5585	0.4539	4.55867	-0.11275	4.55867	0.16325
4.56683	0.1757	4.567	0.17525	4.56667	0.2902	4.567	0.72715	4.56667	0.21465	4.56683	0.44995	4.567	-0.11425	4.567	0.1604
4.57517	0.17385	4.57533	0.174	4.575	0.28945	4.57533	0.72725	4.575	0.21385	4.57517	0.44825	4.57533	-0.1184	4.57533	0.1567
4.5835	0.1729	4.58367	0.1733	4.58333	0.28825	4.58367	0.7252	4.58333	0.2134	4.5835	0.4451	4.58367	-0.1226	4.58367	0.15285
4.59183	0.17295	4.592	0.1734	4.59167	0.28625	4.592	0.7235	4.59167	0.2129	4.59183	0.44145	4.592	-0.123	4.592	0.15145
4.60017	0.17215	4.60033	0.17205	4.6	0.2848	4.60033	0.72045	4.6	0.21165	4.60017	0.4398	4.60033	-0.127	4.60033	0.1487
4.6085	0.17215	4.60867	0.172	4.60833	0.28465	4.60867	0.7176	4.60833	0.21065	4.6085	0.43695	4.60867	-0.1266	4.60867	0.1455
4.61683	0.17125	4.617	0.1722	4.61667	0.2842	4.617	0.71435	4.61667	0.20905	4.61683	0.4357	4.617	-0.1285	4.617	0.14345
4.62517	0.1703	4.62533	0.17095	4.625	0.28295	4.62533	0.70985	4.625	0.2081	4.62517	0.433	4.62533	-0.1306	4.62533	0.1411
4.6335	0.1709	4.63367	0.16955	4.63333	0.2819	4.63367	0.70645	4.63333	0.20655	4.6335	0.42995	4.63367	-0.1321	4.63367	0.13785
4.64183	0.1696	4.642	0.1687	4.64167	0.282	4.642	0.70215	4.64167	0.20435	4.64183	0.42635	4.642	-0.1324	4.642	0.13515
4.65017	0.168	4.65033	0.16655	4.65	0.2795	4.65033	0.69825	4.65	0.20345	4.65017	0.4244	4.65033	-0.13185	4.65033	0.13215
4.6585	0.1682	4.65867	0.16695	4.65833	0.2795	4.65867	0.6952	4.65833	0.20265	4.6585	0.42515	4.65867	-0.1322	4.65867	0.13115
4.66683	0.1671	4.667	0.16625	4.66667	0.27755	4.667	0.6907	4.66667	0.2009	4.66683	0.4218	4.667	-0.13145	4.667	0.12855
4.67517	0.1683	4.67533	0.16515	4.675	0.27675	4.67533	0.688	4.675	0.19905	4.67517	0.4211	4.67533	-0.12965	4.67533	0.12895
4.6835	0.1687	4.68367	0.1642	4.68333	0.2755	4.68367	0.68595	4.68333	0.19755	4.6835	0.42005	4.68367	-0.13115	4.68367	0.1269
4.69183	0.16665	4.692	0.1617	4.69167	0.27305	4.692	0.68245	4.69167	0.1939	4.69183	0.41555	4.692	-0.12765	4.692	0.12415
4.70017	0.1675	4.70033	0.162	4.7	0.27575	4.70033	0.68105	4.7	0.1936	4.70017	0.41755	4.70033	-0.13205	4.70033	0.1247
4.7085	0.16575	4.70867	0.16185	4.70833	0.2737	4.70867	0.677	4.70833	0.1906	4.7085	0.41405	4.70867	-0.1199	4.70867	0.12305
4.71683	0.1655	4.717	0.16035	4.71667	0.27355	4.717	0.6774	4.71667	0.18955	4.71683	0.41385	4.717	-0.15415	4.717	0.12035
4.72517	0.1643	4.72533	0.1591	4.725	0.27165	4.72533	0.67485	4.725	0.18755	4.72517	0.412	4.72533	-0.11455	4.72533	0.1198
4.7335	0.1634	4.73367	0.16	4.73333	0.2736	4.73367	0.676	4.73333	0.18735	4.7335	0.4109	4.73367	-0.16365	4.73367	0.11935
4.74183	0.16345	4.742	0.15905	4.74167	0.2734	4.742	0.6764	4.74167	0.18615	4.74183	0.40995	4.742	-0.12585	4.742	0.11785
4.75017	0.16115	4.75033	0.15775	4.75	0.27145	4.75033	0.67455	4.75	0.18355	4.75017	0.4074	4.75033	-0.12835	4.75033	0.1162
4.7585	0.16135	4.75867	0.15955	4.75833	0.2734	4.75867	0.6744	4.75833	0.18405	4.7585	0.40665	4.75867	-0.13485	4.75867	0.11565
4.76683	0.1602	4.767	0.15815	4.76667	0.2735	4.767	0.67555	4.76667	0.18395	4.76683	0.404	4.767	-0.1365	4.767	0.11375
4.77517	0.15865	4.77533	0.15705	4.775	0.2722	4.77533	0.67275	4.775	0.18265	4.77517	0.4047	4.77533	-0.1378	4.77533	0.11225
4.7835	0.15785	4.78367	0.1569	4.78333	0.2714	4.78367	0.6699	4.78333	0.1815	4.7835	0.40415	4.78367	-0.1379	4.78367	0.1117
4.79183	0.1562	4.792	0.1542	4.79167	0.2708	4.792	0.6672	4.79167	0.17905	4.79183	0.40015	4.792	-0.1394	4.792	0.11005
4.80017	0.1574	4.80033	0.15615	4.8	0.27275	4.80033	0.66495	4.8	0.179	4.80017	0.4001	4.80033	-0.14195	4.80033	0.11
4.8085	0.1568	4.80867	0.1557	4.80833	0.2719	4.80867	0.6612	4.80833	0.17945	4.8085	0.40035	4.80867	-0.1438	4.80867	0.1094
4.81683	0.1563	4.817	0.1548	4.81667	0.27225	4.817	0.65895	4.81667	0.1781	4.81683	0.39855	4.817	-0.1457	4.817	0.1089
4.82517	0.15725	4.82533	0.15545	4.825	0.2735	4.82533	0.6581	4.825	0.1781	4.82517	0.4002	4.82533	-0.1461	4.82533	0.1101
4.8335	0.15385	4.83367	0.15465	4.83333	0.2729	4.83367	0.65425	4.83333	0.1758	4.8335	0.39935	4.83367	-0.14565	4.83367	0.10795
4.84183	0.15635	4.842	0.157	4.84167	0.2742	4.842	0.6532	4.84167	0.17845	4.84183	0.40205	4.842	-0.14855	4.842	0.1094
4.85017	0.1534	4.85033	0.155	4.85	0.27195	4.85033	0.64885	4.85	0.17815	4.85017	0.40055	4.85033	-0.1462	4.85033	0.10745
4.8585	0.1535	4.85867	0.1562	4.85833	0.27425	4.85867	0.64815	4.85833	0.1777	4.8585	0.4022	4.85867	-0.1451	4.85867	0.1096
4.86683	0.1536	4.867	0.15505	4.86667	0.27435	4.867	0.6479	4.86667	0.1794	4.86683	0.40315	4.867	-0.14575	4.867	0.1097
4.87517	0.15245	4.87533	0.1557	4.875	0.27585	4.87533	0.64505	4.875	0.17765	4.87517	0.4026	4.87533	-0.1459	4.87533	0.1097
4.8835	0.15305	4.88367	0.15595	4.88333	0.27765	4.88367	0.644	4.88333	0.17885	4.8835	0.4028	4.88367	-0.1475	4.88367	0.11135
4.89183	0.1537	4.892	0.1569	4.89167	0.2806	4.892	0.6435	4.89167	0.18215	4.89183	0.405	4.892	-0.14725	4.892	0.11395
4.90017	0.15255	4.90033	0.1575	4.9	0.2821	4.90033	0.64325	4.9	0.18215	4.90017	0.40485	4.90033	-0.1442	4.90033	0.1142
4.9085	0.154	4.90867	0.1569	4.90833	0.28375	4.90867	0.6434	4.90833	0.1846	4.9085	0.4074	4.90867	-0.1448	4.90867	0.1158
4.91683	0.1551	4.917	0.15905	4.91667	0.28575	4.917	0.6427	4.91667	0.18595	4.91683	0.4075	4.917	-0.14335	4.917	0.1178
4.92517	0.1533	4.92533	0.15795	4.925	0.28605	4.92533	0.64255	4.925	0.1871	4.92517	0.406	4.92533	-0.1422	4.92533	0.116
4.9335	0.1536	4.93367	0.1583	4.93333	0.2869	4.93367	0.64155	4.93333	0.19045	4.9335	0.40685	4.93367	-0.13845	4.93367	0.1176
4.94183	0.15385	4.942	0.1581	4.94167	0.28735	4.942	0.6402	4.94167	0.19105	4.94183	0.4062	4.942	-0.1406	4.942	0.1172
4.95017	0.1531	4.95033	0.15825	4.95	0.2861	4.95033	0.64035	4.95	0.19215	4.95017	0.40395	4.95033	-0.1362	4.95033	0.1154
4.9585	0.15245	4.95867	0.1574	4.95833	0.28545	4.95867	0.6396	4.95833	0.19345	4.9585	0.40465	4.95867	-0.13595	4.95867	0.11515
4.96683	0.1519	4.967	0.15715	4.96667	0.28435	4.967	0.63945	4.96667	0.1935	4.96683	0.4046	4.967	-0.13635	4.967	0.1145
4.97517	0.15095	4.97533	0.1562	4.975	0.28415	4.97533	0.637	4.975	0.1945	4.97517	0.4016	4.97533	-0.1398	4.97533	0.11215
4.9835	0.1499	4.98367	0.1548	4.98333	0.28395	4.98367	0.6383	4.98333	0.19365	4.9835	0.4009	4.98367	-0.1384	4.98367	0.11255
4.99183	0.149	4.992	0.1543	4.99167	0.28395	4.992	0.63545	4.99167	0.19185	4.99183	0.40185	4.992	-0.13985	4.992	0.11165
5.00017	0.1502	5.00033	0.1544	5	0.2852	5.00033	0.63675	5	0.1931	5.00017	0.4017	5.00033	-0.1367	5.00033	0.1117
5.0085	0.152	5.00867	0.15475	5.00833	0.28645	5.00867	0.63715	5.00833	0.194	5.0085	0.4034	5.00867	-0.1363	5.00867	0.11305
5.01683	0.1486	5.017	0.1545	5.01667	0.28375	5.017	0.6375	5.01667	0.1923	5.01683	0.40255	5.017	-0.1352	5.017	0.1116
5.02517	0.1494	5.02533	0.15375	5.025	0.2853	5.02533	0.6376	5.025	0.1955	5.02517	0.40415	5.02533	-0.1321	5.02533	0.11385
5.0335	0.14885	5.03367	0.1545	5.03333	0.28505	5.03367	0.6384	5.03333	0.198	5.0335	0.40385	5.03367	-0.13155	5.03367	0.1136
5.04183	0.1496	5.042	0.155	5.04167	0.2862	5.042	0.6418	5.04167	0.1991	5.04183	0.40595	5.042	-0.12845	5.042	0.1146
5.05017	0.1476	5.05033	0.15395	5.05	0.286	5.05033	0.64065	5.05	0.202	5.05017	0.40385	5.05033	-0.1268	5.05033	0.11145
5.0585	0.1492	5.05867	0.1537	5.05833	0.2866	5.05867	0.64235	5.05833	0.20575	5.0585	0.4068	5.05867	-0.12665	5.05867	0.1159
5.06683	0.15055	5.067	0.1533	5.06667	0.28755	5.067	0.64465	5.06667	0.209	5.06683	0.4076	5.067	-0.12775	5.067	0.11645
5.07517	0.15145	5.07533	0.15515	5.075	0.29035	5.07533	0.64765	5.075	0.211	5.07517	0.40845	5.07533	-0.1264	5.07533	0.1181
5.0835	0.1527	5.08367	0.1545	5.08333	0.29185	5.08367	0.64995	5.08333	0.2139	5.0835	0.41095	5.08367	-0.12755	5.08367	0.1206
5.09183	0.1544	5.092	0.15705	5.09167	0.295	5.092	0.6538	5.09167	0.2161	5.09183	0.4124	5.092	-0.12585	5.092	0.1216
5.10017	0.1576	5.10033	0.15665	5.1	0.2971	5.10033	0.65885	5.1	0.21665	5.10017	0.41405	5.10033	-0.12615	5.10033	0.126
5.1085	0.16205	5.10867	0.1612	5.10833	0.3015	5.10867	0.6664	5.10833	0.2195	5.1085	0.4171	5.10867	-0.1139	5.10867	0.12755
5.11683	0.16395	5.117	0.1614	5.11667	0.3035	5.117	0.6718	5.11667	0.2204	5.11683	0.4188	5.117	-0.10485	5.117	0.12845
5.12517	0.1673	5.12533	0.16335	5.125	0.30665	5.12533	0.6771	5.125	0.22135	5.12517	0.42105	5.12533	-0.15035	5.12533	0.1314
5.1335	0.1688	5.13367	0.16525	5.13333	0.31135	5.13367	0.68425	5.13333	0.22175	5.1335	0.4232	5.13367	-0.0999	5.13367	0.133
5.14183	0.17115	5.142	0.16675	5.14167	0.3149	5.142	0.69045	5.14167	0.22425	5.14183	0.4252	5.142	-0.07645	5.142	0.1356
5.15017	0.1699	5.15033	0.16545	5.15	0.31645	5.15033	0.6922	5.15	0.2222	5.15017	0.42615	5.15033	-0.0515	5.15033	0.1335
5.1585	0.17315	5.15867	0.16725	5.15833	0.31915	5.15867	0.69535	5.15833	0.2236	5.1585	0.42745	5.15867	-0.01525	5.15867	0.1348
5.16683	0.1731	5.167	0.16725	5.16667	0.32065	5.167	0.69445	5.16667	0.22205	5.16683	0.4288	5.167	0.03195	5.167	0.1364
5.17517	0.1742	5.17533	0.1689	5.175	0.3245	5.17533	0.69415	5.175	0.22275	5.17517	0.43025	5.17533	0.0833	5.17533	0.13815
5.1835	0.17625	5.18367	0.17055	5.18333	0.32585	5.18367	0.6935	5.18333	0.22565	5.1835	0.4327	5.18367	0.13815	5.18367	0.1396
5.19183	0.1748	5.192	0.1677	5.19167	0.3256	5.192	0.68915	5.19167	0.22235	5.19183	0.4304	5.192	0.18975	5.192	0.1375
5.20017	0.1758	5.20033	0.16865	5.2	0.3277	5.20033	0.68835	5.2	0.2233	5.20017	0.43195	5.20033	0.2351	5.20033	0.13955
5.2085	0.1745	5.20867	0.1684	5.20833	0.3274	5.20867	0.6866	5.20833	0.2226	5.2085	0.43005	5.20867	0.26455	5.20867	0.139
5.21683	0.1763	5.217	0.1706	5.21667	0.3296	5.217	0.68625	5.21667	0.2248	5.21683	0.43265	5.217	0.27765	5.217	0.1411
5.22517	0.1774	5.22533	0.1706	5.225	0.3308	5.22533	0.6867	5.225	0.2231	5.22517	0.4339	5.22533	0.2772	5.22533	0.1418
5.2335	0.1779	5.23367	0.17255	5.23333	0.3302	5.23367	0.69165	5.23333	0.2229	5.2335	0.43555	5.23367	0.26445	5.23367	0.14405
5.24183	0.1762	5.242	0.1707	5.24167	0.3315	5.242	0.699	5.24167	0.2232	5.24183	0.4359	5.242	0.2381	5.242	0.14455
5.25017	0.17555	5.25033	0.17245	5.25	0.334	5.25033	0.71535	5.25	0.22135	5.25017	0.4374	5.25033	0.20925	5.25033	0.1473
5.2585	0.17555	5.25867	0.1726	5.25833	0.33615	5.25867	0.7416	5.25833	0.22035	5.2585	0.44045	5.25867	0.1745	5.25867	0.1505
5.26683	0.17505	5.267	0.1741	5.26667	0.33855	5.267	0.78395	5.26667	0.21915	5.26683	0.4428	5.267	0.1456	5.267	0.15535
5.27517	0.1732	5.27533	0.1749	5.275	0.34145	5.27533	0.84575	5.275	0.21935	5.27517	0.4462	5.27533	0.1195	5.27533	0.15975
5.2835	0.1731	5.28367	0.17825	5.28333	0.3462	5.28367	0.9302	5.28333	0.22025	5.2835	0.4505	5.28367	0.10805	5.28367	0.1661
5.29183	0.1718	5.292	0.17755	5.29167	0.3462	5.292	1.03255	5.29167	0.2191	5.29183	0.4506	5.292	0.10265	5.292	0.1715
5.30017	0.17255	5.30033	0.1815	5.3	0.3496	5.30033	1.15885	5.3	0.22205	5.30017	0.4524	5.30033	0.1126	5.30033	0.17955
5.3085	0.172	5.30867	0.1815	5.30833	0.34955	5.30867	1.2939	5.30833	0.2253	5.3085	0.4535	5.30867	0.1385	5.30867	0.18535
5.31683	0.1716	5.317	0.1826	5.31667	0.3511	5.317	1.4308	5.31667	0.2275	5.31683	0.45105	5.317	0.1796	5.317	0.18905
5.32517	0.1713	5.32533	0.18185	5.325	0.3505	5.32533	1.55835	5.325	0.2297	5.32517	0.4508	5.32533	0.2331	5.32533	0.1913
5.3335	0.17075	5.33367	0.1809	5.33333	0.34915	5.33367	1.66435	5.33333	0.23305	5.3335	0.4479	5.33367	0.29415	5.33367	0.19165
5.34183	0.1703	5.342	0.18065	5.34167	0.34615	5.342	1.73795	5.34167	0.23495	5.34183	0.446	5.342	0.3535	5.342	0.19005
5.35017	0.1694	5.35033	0.18035	5.35	0.34515	5.35033	1.7775	5.35	0.23625	5.35017	0.4444	5.35033	0.38775	5.35033	0.1876
5.3585	0.1676	5.35867	0.17865	5.35833	0.3434	5.35867	1.7776	5.35833	0.23645	5.3585	0.44325	5.35867	0.47505	5.35867	0.18325
5.36683	0.16725	5.367	0.18065	5.36667	0.3435	5.367	1.7444	5.36667	0.23765	5.36683	0.4485	5.367	0.51865	5.367	0.18015
5.37517	0.1658	5.37533	0.1759	5.375	0.3412	5.37533	1.6845	5.375	0.23525	5.37517	0.45615	5.37533	0.49485	5.37533	0.1755
5.3835	0.1648	5.38367	0.1763	5.38333	0.3431	5.38367	1.61065	5.38333	0.2345	5.3835	0.47145	5.38367	0.4938	5.38367	0.173
5.39183	0.164	5.392	0.1779	5.39167	0.3462	5.392	1.532	5.39167	0.2338	5.39183	0.4955	5.392	0.4741	5.392	0.173
5.40017	0.1653	5.40033	0.18045	5.4	0.3519	5.40033	1.46425	5.4	0.23555	5.40017	0.5339	5.40033	0.44435	5.40033	0.17605
5.4085	0.16405	5.40867	0.18505	5.40833	0.3577	5.40867	1.4216	5.40833	0.24045	5.4085	0.5824	5.40867	0.4034	5.40867	0.1825
5.41683	0.1659	5.417	0.19095	5.41667	0.37005	5.417	1.427	5.41667	0.249	5.41683	0.6429	5.417	0.36065	5.417	0.1943
5.42517	0.16735	5.42533	0.19975	5.425	0.38345	5.42533	1.4988	5.425	0.2657	5.42517	0.7114	5.42533	0.31565	5.42533	0.211
5.4335	0.1706	5.43367	0.20805	5.43333	0.3988	5.43367	1.6633	5.43333	0.2926	5.4335	0.7834	5.43367	0.2724	5.43367	0.2318
5.44183	0.1755	5.442	0.2187	5.44167	0.41955	5.442	1.94055	5.44167	0.3341	5.44183	0.8509	5.442	0.2329	5.442	0.25745
5.45017	0.185	5.45033	0.2287	5.45	0.43915	5.45033	2.34075	5.45	0.39405	5.45017	0.9084	5.45033	0.1944	5.45033	0.2859
5.4585	0.19365	5.45867	0.23875	5.45833	0.4564	5.45867	2.85855	5.45833	0.46905	5.4585	0.9488	5.45867	0.1634	5.45867	0.3135
5.46683	0.2072	5.467	0.24575	5.46667	0.4703	5.467	3.46805	5.46667	0.5591	5.46683	0.9693	5.467	0.1363	5.467	0.3351
5.47517	0.2246	5.47533	0.2503	5.475	0.4806	5.47533	4.12185	5.475	0.6588	5.47517	0.97215	5.47533	0.11375	5.47533	0.35185
5.4835	0.24275	5.48367	0.2515	5.48333	0.4861	5.48367	4.75445	5.48333	0.7597	5.4835	0.95555	5.48367	0.09445	5.48367	0.36215
5.49183	0.2584	5.492	0.24795	5.49167	0.48345	5.492	5.29935	5.49167	0.8487	5.49183	0.92405	5.492	0.08095	5.492	0.3613
5.50017	0.27335	5.50033	0.2429	5.5	0.4777	5.50033	5.69885	5.5	0.92115	5.50017	0.8821	5.50033	0.071	5.50033	0.3571
5.5085	0.28475	5.50867	0.23685	5.50833	0.47055	5.50867	5.91335	5.50833	0.9673	5.5085	0.83615	5.50867	0.0607	5.50867	0.3461
5.51683	0.2894	5.517	0.2264	5.51667	0.45885	5.517	5.9346	5.51667	0.9844	5.51683	0.7922	5.517	0.0557	5.517	0.33025
5.52517	0.29215	5.52533	0.2222	5.525	0.44975	5.52533	5.77885	5.525	0.9753	5.52517	0.75335	5.52533	0.05355	5.52533	0.31745
5.5335	0.2899	5.53367	0.21615	5.53333	0.43855	5.53367	5.47755	5.53333	0.94085	5.5335	0.72135	5.53367	0.0511	5.53367	0.3026
5.54183	0.2816	5.542	0.2096	5.54167	0.43285	5.542	5.076	5.54167	0.8889	5.54183	0.69655	5.542	0.04865	5.542	0.28915
5.55017	0.2711	5.55033	0.2048	5.55	0.4288	5.55033	4.62125	5.55	0.8257	5.55017	0.68305	5.55033	0.05105	5.55033	0.2807
5.5585	0.25755	5.55867	0.20195	5.55833	0.43005	5.55867	4.1478	5.55833	0.7599	5.5585	0.68155	5.55867	0.0534	5.55867	0.27755
5.56683	0.2443	5.567	0.2004	5.56667	0.4361	5.567	3.689	5.56667	0.69325	5.56683	0.6885	5.567	0.055	5.567	0.2786
5.57517	0.2307	5.57533	0.20005	5.575	0.44865	5.57533	3.2625	5.575	0.633	5.57517	0.7035	5.57533	0.05665	5.57533	0.288
5.5835	0.21805	5.58367	0.19845	5.58333	0.4653	5.58367	2.88215	5.58333	0.5804	5.5835	0.7251	5.58367	0.0584	5.58367	0.3036
5.59183	0.2077	5.592	0.2003	5.59167	0.4889	5.592	2.5519	5.59167	0.53885	5.59183	0.74635	5.592	0.0606	5.592	0.3253
5.60017	0.20045	5.60033	0.20245	5.6	0.51525	5.60033	2.275	5.6	0.5111	5.60017	0.76895	5.60033	0.06145	5.60033	0.3507
5.6085	0.19285	5.60867	0.20395	5.60833	0.5435	5.60867	2.04665	5.60833	0.49155	5.6085	0.7886	5.60867	0.06225	5.60867	0.3803
5.61683	0.18655	5.617	0.2059	5.61667	0.5708	5.617	1.86425	5.61667	0.48615	5.61683	0.8015	5.617	0.06185	5.617	0.4081
5.62517	0.18385	5.62533	0.2062	5.625	0.59985	5.62533	1.72365	5.625	0.492	5.62517	0.8138	5.62533	0.06635	5.62533	0.4344
5.6335	0.18085	5.63367	0.20655	5.63333	0.62735	5.63367	1.6165	5.63333	0.50615	5.6335	0.821	5.63367	0.0686	5.63367	0.45645
5.64183	0.17865	5.642	0.206	5.64167	0.65055	5.642	1.53465	5.64167	0.5264	5.64183	0.8268	5.642	0.0546	5.642	0.47185
5.65017	0.17795	5.65033	0.20685	5.65	0.6769	5.65033	1.4799	5.65	0.55155	5.65017	0.834	5.65033	0.0424	5.65033	0.48135
5.6585	0.1796	5.65867	0.2067	5.65833	0.7	5.65867	1.43835	5.65833	0.57605	5.6585	0.84235	5.65867	0.0673	5.65867	0.48505
5.66683	0.1821	5.667	0.20865	5.66667	0.7231	5.667	1.4092	5.66667	0.6015	5.66683	0.8557	5.667	0.0701	5.667	0.4876
5.67517	0.18645	5.67533	0.21265	5.675	0.74255	5.67533	1.38775	5.675	0.6198	5.67517	0.866	5.67533	0.0702	5.67533	0.4867
5.6835	0.1916	5.68367	0.21675	5.68333	0.7565	5.68367	1.3689	5.68333	0.63555	5.6835	0.87615	5.68367	0.07005	5.68367	0.48375
5.69183	0.2008	5.692	0.22875	5.69167	0.7665	5.692	1.355	5.69167	0.6479	5.69183	0.88325	5.692	0.0649	5.692	0.4837
5.70017	0.2098	5.70033	0.24055	5.7	0.7693	5.70033	1.34125	5.7	0.65625	5.70017	0.88215	5.70033	0.068	5.70033	0.4817
5.7085	0.222	5.70867	0.25765	5.70833	0.76455	5.70867	1.3261	5.70833	0.66515	5.7085	0.87805	5.70867	0.0669	5.70867	0.47975
5.71683	0.23435	5.717	0.27715	5.71667	0.7525	5.717	1.3073	5.71667	0.6744	5.71683	0.8644	5.717	0.066	5.717	0.47605
5.72517	0.246	5.72533	0.2942	5.725	0.73615	5.72533	1.2853	5.725	0.68155	5.72517	0.84425	5.72533	0.06385	5.72533	0.4687
5.7335	0.25465	5.73367	0.31265	5.73333	0.7161	5.73367	1.25745	5.73333	0.6871	5.7335	0.82265	5.73367	0.0652	5.73367	0.4587
5.74183	0.26255	5.742	0.32735	5.74167	0.6961	5.742	1.2242	5.74167	0.6909	5.74183	0.79705	5.742	0.06455	5.742	0.4462
5.75017	0.26635	5.75033	0.33735	5.75	0.6767	5.75033	1.1877	5.75	0.6894	5.75017	0.77185	5.75033	0.06555	5.75033	0.431
5.7585	0.2664	5.75867	0.34045	5.75833	0.6583	5.75867	1.14595	5.75833	0.68085	5.7585	0.74705	5.75867	0.06545	5.75867	0.4133
5.76683	0.25935	5.767	0.3377	5.76667	0.6431	5.767	1.10305	5.76667	0.66625	5.76683	0.72455	5.767	0.07005	5.767	0.39415
5.77517	0.2537	5.77533	0.33305	5.775	0.63255	5.77533	1.0617	5.775	0.64815	5.77517	0.7054	5.77533	0.077	5.77533	0.37525
5.7835	0.2475	5.78367	0.32625	5.78333	0.6271	5.78367	1.02385	5.78333	0.62665	5.7835	0.6933	5.78367	0.0843	5.78367	0.36295
5.79183	0.23715	5.792	0.31515	5.79167	0.6246	5.792	0.98675	5.79167	0.6009	5.79183	0.6794	5.792	0.0948	5.792	0.34905
5.80017	0.22645	5.80033	0.3045	5.8	0.6263	5.80033	0.9541	5.8	0.5745	5.80017	0.6687	5.80033	0.1024	5.80033	0.3382
5.8085	0.21825	5.80867	0.29395	5.80833	0.6336	5.80867	0.92745	5.80833	0.5512	5.8085	0.6616	5.80867	0.11295	5.80867	0.33205
5.81683	0.21005	5.817	0.2822	5.81667	0.6412	5.817	0.9022	5.81667	0.5284	5.81683	0.65485	5.817	0.1208	5.817	0.32715
5.82517	0.2035	5.82533	0.2739	5.825	0.6527	5.82533	0.88145	5.825	0.5081	5.82517	0.65195	5.82533	0.12825	5.82533	0.3248
5.8335	0.1958	5.83367	0.26405	5.83333	0.66445	5.83367	0.8641	5.83333	0.4904	5.8335	0.6458	5.83367	0.13125	5.83367	0.3234
5.84183	0.1913	5.842	0.2561	5.84167	0.6764	5.842	0.8517	5.84167	0.47495	5.84183	0.64385	5.842	0.1345	5.842	0.32165
5.85017	0.1893	5.85033	0.2517	5.85	0.68835	5.85033	0.83955	5.85	0.4634	5.85017	0.6419	5.85033	0.1361	5.85033	0.326
5.8585	0.1852	5.85867	0.242	5.85833	0.6987	5.85867	0.8307	5.85833	0.45285	5.8585	0.63875	5.85867	0.1304	5.85867	0.3249
5.86683	0.18375	5.867	0.23755	5.86667	0.71045	5.867	0.82625	5.86667	0.4444	5.86683	0.6371	5.867	0.1256	5.867	0.3279
5.87517	0.1823	5.87533	0.23405	5.875	0.72125	5.87533	0.82085	5.875	0.44075	5.87517	0.6367	5.87533	0.11975	5.87533	0.32885
5.8835	0.1826	5.88367	0.2292	5.88333	0.73045	5.88367	0.8182	5.88333	0.43585	5.8835	0.63635	5.88367	0.1119	5.88367	0.33225
5.89183	0.18065	5.892	0.2252	5.89167	0.74025	5.892	0.81455	5.89167	0.43135	5.89183	0.6362	5.892	0.09875	5.892	0.33285
5.90017	0.1799	5.90033	0.22395	5.9	0.7475	5.90033	0.8109	5.9	0.42795	5.90017	0.63735	5.90033	0.0873	5.90033	0.334
5.9085	0.17875	5.90867	0.2205	5.90833	0.7536	5.90867	0.80695	5.90833	0.4249	5.9085	0.6386	5.90867	0.0762	5.90867	0.3358
5.91683	0.17955	5.917	0.22035	5.91667	0.76375	5.917	0.8046	5.91667	0.42265	5.91683	0.64175	5.917	0.06365	5.917	0.3409
5.92517	0.17835	5.92533	0.21885	5.925	0.77065	5.92533	0.8024	5.925	0.41955	5.92517	0.6449	5.92533	0.05195	5.92533	0.3461
5.9335	0.17505	5.93367	0.2169	5.93333	0.77815	5.93367	0.7971	5.93333	0.41885	5.9335	0.64765	5.93367	0.0409	5.93367	0.35135
5.94183	0.17335	5.942	0.2162	5.94167	0.78525	5.942	0.7945	5.94167	0.416	5.94183	0.65235	5.942	0.0315	5.942	0.359
5.95017	0.1726	5.95033	0.21695	5.95	0.79285	5.95033	0.7935	5.95	0.4158	5.95017	0.656	5.95033	0.02705	5.95033	0.36855
5.9585	0.1693	5.95867	0.2157	5.95833	0.7991	5.95867	0.79105	5.95833	0.41465	5.9585	0.6607	5.95867	0.0211	5.95867	0.376
5.96683	0.1695	5.967	0.21885	5.96667	0.80925	5.967	0.79265	5.96667	0.4179	5.96683	0.6668	5.967	0.01485	5.967	0.3866
5.97517	0.16755	5.97533	0.22085	5.975	0.819	5.97533	0.7934	5.975	0.41875	5.97517	0.67145	5.97533	0.01265	5.97533	0.39435
5.9835	0.1662	5.98367	0.2192	5.98333	0.82495	5.98367	0.79435	5.98333	0.42075	5.9835	0.67405	5.98367	0.01305	5.98367	0.4007
5.99183	0.16475	5.992	0.2186	5.99167	0.8319	5.992	0.7965	5.99167	0.4224	5.99183	0.67785	5.992	0.01385	5.992	0.40525
6.00017	0.16425	6.00033	0.22035	6	0.83745	6.00033	0.79935	6	0.42605	6.00017	0.6803	6.00033	0.02245	6.00033	0.40785
6.0085	0.16355	6.00867	0.21785	6.00833	0.84045	6.00867	0.80175	6.00833	0.42885	6.0085	0.68075	6.00867	0.0308	6.00867	0.40825
6.01683	0.1624	6.017	0.218	6.01667	0.84115	6.017	0.8051	6.01667	0.4349	6.01683	0.6812	6.017	0.0445	6.017	0.40925
6.02517	0.16175	6.02533	0.21985	6.025	0.8415	6.02533	0.8092	6.025	0.4412	6.02517	0.6828	6.02533	0.06175	6.02533	0.40865
6.0335	0.16345	6.03367	0.219	6.03333	0.8402	6.03367	0.8128	6.03333	0.44685	6.0335	0.6815	6.03367	0.08235	6.03367	0.408
6.04183	0.16235	6.042	0.2198	6.04167	0.8349	6.042	0.81585	6.04167	0.45125	6.04183	0.68105	6.042	0.10325	6.042	0.40695
6.05017	0.16365	6.05033	0.21975	6.05	0.8305	6.05033	0.81845	6.05	0.45915	6.05017	0.681	6.05033	0.12945	6.05033	0.40805
6.0585	0.1657	6.05867	0.2202	6.05833	0.82335	6.05867	0.82005	6.05833	0.4633	6.0585	0.6807	6.05867	0.15715	6.05867	0.4056
6.06683	0.16395	6.067	0.2186	6.06667	0.8144	6.067	0.81895	6.06667	0.4647	6.06683	0.6803	6.067	0.1857	6.067	0.4035
6.07517	0.1633	6.07533	0.21795	6.075	0.80575	6.07533	0.8199	6.075	0.46755	6.07517	0.6817	6.07533	0.2119	6.07533	0.4021
6.0835	0.1638	6.08367	0.21965	6.08333	0.80095	6.08367	0.82045	6.08333	0.4708	6.0835	0.6863	6.08367	0.23515	6.08367	0.4008
6.09183	0.1627	6.092	0.21905	6.09167	0.79575	6.092	0.81965	6.09167	0.47095	6.09183	0.6908	6.092	0.25305	6.092	0.3984
6.10017	0.16235	6.10033	0.22035	6.1	0.7948	6.10033	0.82095	6.1	0.4718	6.10017	0.6988	6.10033	0.2729	6.10033	0.39795
6.1085	0.1606	6.10867	0.2205	6.10833	0.79645	6.10867	0.81995	6.10833	0.47255	6.1085	0.7075	6.10867	0.28215	6.10867	0.3977
6.11683	0.1566	6.117	0.22295	6.11667	0.802	6.117	0.8185	6.11667	0.4704	6.11683	0.71705	6.117	0.28885	6.117	0.39935
6.12517	0.1584	6.12533	0.22525	6.125	0.81385	6.12533	0.82005	6.125	0.4734	6.12517	0.7306	6.12533	0.28765	6.12533	0.4034
6.1335	0.1563	6.13367	0.2249	6.13333	0.82695	6.13367	0.81945	6.13333	0.4707	6.1335	0.7399	6.13367	0.2834	6.13367	0.4069
6.14183	0.1564	6.142	0.2275	6.14167	0.84355	6.142	0.82195	6.14167	0.47315	6.14183	0.75175	6.142	0.27585	6.142	0.4125
6.15017	0.1565	6.15033	0.2305	6.15	0.86245	6.15033	0.8241	6.15	0.47595	6.15017	0.7633	6.15033	0.26095	6.15033	0.42065
6.1585	0.15795	6.15867	0.23315	6.15833	0.8841	6.15867	0.8282	6.15833	0.48	6.1585	0.7729	6.15867	0.2451	6.15867	0.42915
6.16683	0.1562	6.167	0.2334	6.16667	0.9041	6.167	0.83005	6.16667	0.4833	6.16683	0.77695	6.167	0.22785	6.167	0.43625
6.17517	0.15675	6.17533	0.23595	6.175	0.92275	6.17533	0.83625	6.175	0.4917	6.17517	0.78245	6.17533	0.20915	6.17533	0.4446
6.1835	0.1543	6.18367	0.2348	6.18333	0.93745	6.18367	0.841	6.18333	0.49715	6.1835	0.78255	6.18367	0.18965	6.18367	0.4509
6.19183	0.15775	6.192	0.2358	6.19167	0.95115	6.192	0.84985	6.19167	0.50785	6.19183	0.78125	6.192	0.1715	6.192	0.45815
6.20017	0.15765	6.20033	0.23515	6.2	0.95645	6.20033	0.85505	6.2	0.51415	6.20017	0.77425	6.20033	0.15545	6.20033	0.4607
6.2085	0.159	6.20867	0.23615	6.20833	0.9594	6.20867	0.8648	6.20833	0.52655	6.2085	0.76985	6.20867	0.14245	6.20867	0.46425
6.21683	0.15795	6.217	0.2367	6.21667	0.954	6.217	0.87045	6.21667	0.5359	6.21683	0.7589	6.217	0.13105	6.217	0.463
6.22517	0.16035	6.22533	0.23605	6.225	0.94605	6.22533	0.87635	6.225	0.5434	6.22517	0.74875	6.22533	0.12445	6.22533	0.4622
6.2335	0.16015	6.23367	0.23565	6.23333	0.9312	6.23367	0.88105	6.23333	0.54905	6.2335	0.7347	6.23367	0.12305	6.23367	0.4567
6.24183	0.16145	6.242	0.23575	6.24167	0.91555	6.242	0.88665	6.24167	0.5558	6.24183	0.7237	6.242	0.1271	6.242	0.4531
6.25017	0.16035	6.25033	0.2352	6.25	0.89435	6.25033	0.88635	6.25	0.55675	6.25017	0.7118	6.25033	0.1317	6.25033	0.4452
6.2585	0.16055	6.25867	0.2349	6.25833	0.873	6.25867	0.88745	6.25833	0.55715	6.2585	0.7016	6.25867	0.13705	6.25867	0.4369
6.26683	0.1577	6.267	0.234	6.26667	0.84905	6.267	0.8843	6.26667	0.5527	6.26683	0.68995	6.267	0.14715	6.267	0.4279
6.27517	0.1575	6.27533	0.2338	6.275	0.8254	6.27533	0.88035	6.275	0.54645	6.27517	0.6803	6.27533	0.1567	6.27533	0.4177
6.2835	0.1541	6.28367	0.23365	6.28333	0.80125	6.28367	0.8742	6.28333	0.5394	6.2835	0.67275	6.28367	0.16395	6.28367	0.4095
6.29183	0.1525	6.292	0.2335	6.29167	0.77975	6.292	0.86905	6.29167	0.5296	6.29183	0.6663	6.292	0.1689	6.292	0.3991
6.30017	0.1511	6.30033	0.23395	6.3	0.761	6.30033	0.86335	6.3	0.51945	6.30017	0.6632	6.30033	0.1757	6.30033	0.391
6.3085	0.1474	6.30867	0.23575	6.30833	0.7447	6.30867	0.85725	6.30833	0.51015	6.3085	0.6622	6.30867	0.17985	6.30867	0.38495
6.31683	0.14755	6.317	0.2381	6.31667	0.7332	6.317	0.85395	6.31667	0.5012	6.31683	0.6629	6.317	0.1849	6.317	0.3806
6.32517	0.1447	6.32533	0.2371	6.325	0.72135	6.32533	0.8476	6.325	0.4902	6.32517	0.66405	6.32533	0.1837	6.32533	0.37575
6.3335	0.14165	6.33367	0.23815	6.33333	0.7128	6.33367	0.84005	6.33333	0.4803	6.3335	0.6702	6.33367	0.18495	6.33367	0.3724
6.34183	0.1412	6.342	0.24065	6.34167	0.70925	6.342	0.83675	6.34167	0.4732	6.34183	0.68185	6.342	0.1871	6.342	0.37225
6.35017	0.141	6.35033	0.2428	6.35	0.71145	6.35033	0.83495	6.35	0.46725	6.35017	0.69715	6.35033	0.1867	6.35033	0.37405
6.3585	0.1394	6.35867	0.2461	6.35833	0.71475	6.35867	0.8327	6.35833	0.46085	6.3585	0.71635	6.35867	0.1867	6.35867	0.3785
6.36683	0.1363	6.367	0.24705	6.36667	0.72385	6.367	0.82955	6.36667	0.456	6.36683	0.7367	6.367	0.18635	6.367	0.3844
6.37517	0.13585	6.37533	0.2515	6.375	0.74125	6.37533	0.83185	6.375	0.4551	6.37517	0.76405	6.37533	0.1862	6.37533	0.39675
6.3835	0.13425	6.38367	0.25485	6.38333	0.76225	6.38367	0.8331	6.38333	0.45345	6.3835	0.7941	6.38367	0.1871	6.38367	0.4152
6.39183	0.13205	6.392	0.2591	6.39167	0.78985	6.392	0.83835	6.39167	0.45635	6.39183	0.82855	6.392	0.1895	6.392	0.43985
6.40017	0.13345	6.40033	0.26455	6.4	0.82625	6.40033	0.84705	6.4	0.4582	6.40017	0.8646	6.40033	0.20295	6.40033	0.47435
6.4085	0.134	6.40867	0.2713	6.40833	0.86545	6.40867	0.85515	6.40833	0.4721	6.4085	0.8981	6.40867	0.2216	6.40867	0.51755
6.41683	0.13325	6.417	0.2752	6.41667	0.9077	6.417	0.8677	6.41667	0.48145	6.41683	0.93	6.417	0.252	6.417	0.56935
6.42517	0.13365	6.42533	0.2795	6.425	0.95425	6.42533	0.88385	6.425	0.49755	6.42517	0.95925	6.42533	0.3005	6.42533	0.6253
6.4335	0.1331	6.43367	0.28545	6.43333	0.9993	6.43367	0.9023	6.43333	0.5157	6.4335	0.98365	6.43367	0.3631	6.43367	0.68415
6.44183	0.13425	6.442	0.29115	6.44167	1.04345	6.442	0.92435	6.44167	0.5393	6.44183	1.0018	6.442	0.4529	6.442	0.74125
6.45017	0.1328	6.45033	0.29395	6.45	1.08185	6.45033	0.95135	6.45	0.5643	6.45017	1.01205	6.45033	0.5616	6.45033	0.7907
6.4585	0.13435	6.45867	0.29985	6.45833	1.11705	6.45867	0.9811	6.45833	0.5947	6.4585	1.01775	6.45867	0.6882	6.45867	0.8288
6.46683	0.13595	6.467	0.30395	6.46667	1.14275	6.467	1.0109	6.46667	0.6246	6.46683	1.0155	6.467	0.83885	6.467	0.8517
6.47517	0.136	6.47533	0.3082	6.475	1.16125	6.47533	1.0432	6.475	0.65615	6.47517	1.00465	6.47533	0.98815	6.47533	0.8608
6.4835	0.13625	6.48367	0.31	6.48333	1.1712	6.48367	1.0721	6.48333	0.6862	6.4835	0.9908	6.48367	1.1499	6.48367	0.85605
6.49183	0.13745	6.492	0.31475	6.49167	1.17245	6.492	1.10055	6.49167	0.71715	6.49183	0.97215	6.492	1.2989	6.492	0.8423
6.50017	0.1401	6.50033	0.317	6.5	1.1648	6.50033	1.1264	6.5	0.74635	6.50017	0.9514	6.50033	1.42765	6.50033	0.82025
6.5085	0.13895	6.50867	0.3186	6.50833	1.1478	6.50867	1.1455	6.50833	0.767	6.5085	0.92405	6.50867	1.53185	6.50867	0.78955
6.51683	0.1418	6.517	0.3214	6.51667	1.1254	6.517	1.15885	6.51667	0.78585	6.51683	0.8978	6.517	1.60435	6.517	0.7578
6.52517	0.1411	6.52533	0.32465	6.525	1.09735	6.52533	1.1685	6.525	0.79805	6.52517	0.87045	6.52533	1.64255	6.52533	0.72295
6.5335	0.14225	6.53367	0.3294	6.53333	1.0661	6.53367	1.17085	6.53333	0.80465	6.5335	0.84435	6.53367	1.65145	6.53367	0.69125
6.54183	0.1417	6.542	0.33305	6.54167	1.0337	6.542	1.16865	6.54167	0.80325	6.54183	0.8186	6.542	1.63595	6.542	0.65615
6.55017	0.1411	6.55033	0.3377	6.55	0.998	6.55033	1.16415	6.55	0.79715	6.55017	0.79625	6.55033	1.59595	6.55033	0.62555
6.5585	0.1407	6.55867	0.34185	6.55833	0.96585	6.55867	1.1568	6.55833	0.78565	6.5585	0.77515	6.55867	1.5409	6.55867	0.59395
6.56683	0.13875	6.567	0.3455	6.56667	0.9318	6.567	1.14855	6.56667	0.7702	6.56683	0.75645	6.567	1.47425	6.567	0.56525
6.57517	0.13805	6.57533	0.3513	6.575	0.90175	6.57533	1.14055	6.575	0.7518	6.57517	0.7425	6.57533	1.40675	6.57533	0.54065
6.5835	0.1362	6.58367	0.35775	6.58333	0.87415	6.58367	1.13665	6.58333	0.7311	6.5835	0.73255	6.58367	1.33855	6.58367	0.5161
6.59183	0.1343	6.592	0.36545	6.59167	0.8515	6.592	1.1404	6.59167	0.7084	6.59183	0.72635	6.592	1.28005	6.592	0.49715
6.60017	0.1341	6.60033	0.37385	6.6	0.8344	6.60033	1.15645	6.6	0.6876	6.60017	0.72495	6.60033	1.23995	6.60033	0.48165
6.6085	0.13285	6.60867	0.3829	6.60833	0.82065	6.60867	1.19175	6.60833	0.66755	6.6085	0.72855	6.60867	1.2247	6.60867	0.4688
6.61683	0.1313	6.617	0.39445	6.61667	0.80915	6.617	1.2561	6.61667	0.6492	6.61683	0.73665	6.617	1.2363	6.617	0.45905
6.62517	0.1305	6.62533	0.40945	6.625	0.8018	6.62533	1.35475	6.625	0.6341	6.62517	0.74725	6.62533	1.2794	6.62533	0.45195
6.6335	0.1303	6.63367	0.4331	6.63333	0.8016	6.63367	1.5061	6.63333	0.6258	6.6335	0.7612	6.63367	1.3531	6.63367	0.4498
6.64183	0.12865	6.642	0.48125	6.64167	0.8002	6.642	1.70755	6.64167	0.62105	6.64183	0.7762	6.642	1.4494	6.642	0.45075
6.65017	0.1273	6.65033	0.59975	6.65	0.8066	6.65033	1.966	6.65	0.62525	6.65017	0.7946	6.65033	1.5519	6.65033	0.45455
6.6585	0.12815	6.65867	0.87505	6.65833	0.81425	6.65867	2.27135	6.65833	0.63815	6.6585	0.81445	6.65867	1.6445	6.65867	0.46505
6.66683	0.1263	6.667	1.45825	6.66667	0.82865	6.667	2.6051	6.66667	0.65705	6.66683	0.83685	6.667	1.7112	6.667	0.47695
6.67517	0.12645	6.67533	2.5377	6.675	0.84625	6.67533	2.94145	6.675	0.68135	6.67517	0.8678	6.67533	1.74165	6.67533	0.492
6.6835	0.12705	6.68367	4.27875	6.68333	0.87455	6.68367	3.2555	6.68333	0.7156	6.6835	0.9155	6.68367	1.73825	6.68367	0.51155
6.69183	0.1275	6.692	6.78305	6.69167	0.9159	6.692	3.51625	6.69167	0.751	6.69183	0.98785	6.692	1.69925	6.692	0.53445
6.70017	0.1271	6.70033	10.0158	6.7	0.98565	6.70033	3.70825	6.7	0.78805	6.70017	1.09575	6.70033	1.6321	6.70033	0.56535
6.7085	0.12735	6.70867	13.7994	6.70833	1.08945	6.70867	3.81905	6.70833	0.8223	6.7085	1.24605	6.70867	1.55455	6.70867	0.6127
6.71683	0.12825	6.717	17.8481	6.71667	1.24945	6.717	3.85545	6.71667	0.8531	6.71683	1.4332	6.717	1.4737	6.717	0.6939
6.72517	0.13035	6.72533	21.7881	6.725	1.4697	6.72533	3.826	6.725	0.87975	6.72517	1.6459	6.72533	1.39775	6.72533	0.836
6.7335	0.1312	6.73367	25.2626	6.73333	1.7449	6.73367	3.7534	6.73333	0.89775	6.7335	1.86625	6.73367	1.33085	6.73367	1.05865
6.74183	0.12945	6.742	27.9942	6.74167	2.06125	6.742	3.66975	6.74167	0.9112	6.74183	2.07765	6.742	1.2736	6.742	1.37325
6.75017	0.13065	6.75033	29.819	6.75	2.39615	6.75033	3.61565	6.75	0.92355	6.75017	2.26645	6.75033	1.22455	6.75033	1.77705
6.7585	0.1312	6.75867	30.6936	6.75833	2.72585	6.75867	3.6309	6.75833	0.94125	6.7585	2.42495	6.75867	1.18165	6.75867	2.23985
6.76683	0.1297	6.767	30.7117	6.76667	3.0241	6.767	3.7439	6.76667	0.97095	6.76683	2.54575	6.767	1.1476	6.767	2.7279
6.77517	0.13	6.77533	30.0215	6.775	3.28005	6.77533	3.9715	6.775	1.0268	6.77517	2.63635	6.77533	1.11965	6.77533	3.20335
6.7835	0.1315	6.78367	28.8132	6.78333	3.48275	6.78367	4.30545	6.78333	1.11655	6.7835	2.69445	6.78367	1.0928	6.78367	3.6324
6.79183	0.13325	6.792	27.253	6.79167	3.6341	6.792	4.7224	6.79167	1.2522	6.79183	2.72915	6.792	1.063	6.792	3.9942
6.80017	0.1334	6.80033	25.501	6.8	3.73315	6.80033	5.17865	6.8	1.42685	6.80017	2.73945	6.80033	1.0325	6.80033	4.27975
6.8085	0.13965	6.80867	23.6744	6.80833	3.793	6.80867	5.63985	6.80833	1.63655	6.8085	2.7341	6.80867	1.00195	6.80867	4.49345
6.81683	0.14615	6.817	21.8573	6.81667	3.81435	6.817	6.0665	6.81667	1.8618	6.81683	2.71655	6.817	0.9659	6.817	4.63495
6.82517	0.1555	6.82533	20.1044	6.825	3.80625	6.82533	6.43545	6.825	2.0832	6.82517	2.68785	6.82533	0.93105	6.82533	4.71395
6.8335	0.1681	6.83367	18.4586	6.83333	3.7742	6.83367	6.73945	6.83333	2.287	6.8335	2.65215	6.83367	0.89045	6.83367	4.74225
6.84183	0.1872	6.842	16.9343	6.84167	3.72615	6.842	6.977	6.84167	2.4648	6.84183	2.61175	6.842	0.8499	6.842	4.72825
6.85017	0.20825	6.85033	15.5467	6.85	3.6629	6.85033	7.1533	6.85	2.61	6.85017	2.56915	6.85033	0.8028	6.85033	4.6787
6.8585	0.23265	6.85867	14.2871	6.85833	3.59105	6.85867	7.28105	6.85833	2.7215	6.8585	2.5271	6.85867	0.7586	6.85867	4.60205
6.86683	0.2552	6.867	13.1509	6.86667	3.50915	6.867	7.37045	6.86667	2.80255	6.86683	2.4842	6.867	0.71125	6.867	4.50445
6.87517	0.27915	6.87533	12.1447	6.875	3.4278	6.87533	7.433	6.875	2.8653	6.87517	2.4483	6.87533	0.6643	6.87533	4.39625
6.8835	0.2992	6.88367	11.2393	6.88333	3.3407	6.88367	7.4793	6.88333	2.90605	6.8835	2.4146	6.88367	0.62355	6.88367	4.2755
6.89183	0.3163	6.892	10.4286	6.89167	3.2564	6.892	7.526	6.89167	2.9362	6.89183	2.3893	6.892	0.58105	6.892	4.15355
6.90017	0.32965	6.90033	9.70585	6.9	3.17235	6.90033	7.5765	6.9	2.95795	6.90017	2.3734	6.90033	0.53785	6.90033	4.03105
6.9085	0.33675	6.90867	9.06495	6.90833	3.0899	6.90867	7.64515	6.90833	2.97475	6.9085	2.3671	6.90867	0.5002	6.90867	3.91205
6.91683	0.34235	6.917	8.4909	6.91667	3.01075	6.917	7.7335	6.91667	2.9909	6.91683	2.3712	6.917	0.4643	6.917	3.8006
6.92517	0.3443	6.92533	7.98375	6.925	2.9365	6.92533	7.8413	6.925	3.01155	6.92517	2.388	6.92533	0.4326	6.92533	3.70765
6.9335	0.34315	6.93367	7.5281	6.93333	2.865	6.93367	7.95985	6.93333	3.03	6.9335	2.4055	6.93367	0.40115	6.93367	3.63245
6.94183	0.33825	6.942	7.12265	6.94167	2.8004	6.942	8.0843	6.94167	3.05045	6.94183	2.42605	6.942	0.3744	6.942	3.58545
6.95017	0.33415	6.95033	6.7592	6.95	2.7398	6.95033	8.1989	6.95	3.06925	6.95017	2.438	6.95033	0.34825	6.95033	3.5786
6.9585	0.3269	6.95867	6.4285	6.95833	2.684	6.95867	8.28815	6.95833	3.08095	6.9585	2.43815	6.95867	0.3246	6.95867	3.61315
6.96683	0.3184	6.967	6.12815	6.96667	2.6338	6.967	8.34245	6.96667	3.08815	6.96683	2.41985	6.967	0.3068	6.967	3.6964
6.97517	0.3116	6.97533	5.85175	6.975	2.5851	6.97533	8.3549	6.975	3.0881	6.97517	2.38275	6.97533	0.28755	6.97533	3.8297
6.9835	0.30545	6.98367	5.5953	6.98333	2.539	6.98367	8.32325	6.98333	3.0774	6.9835	2.3285	6.98367	0.2728	6.98367	3.9987
6.99183	0.2954	6.992	5.3507	6.99167	2.48895	6.992	8.25495	6.99167	3.05765	6.99183	2.2592	6.992	0.2582	6.992	4.1819
7.00017	0.28545	7.00033	5.1171	7	2.43655	7.00033	8.16525	7	3.0317	7.00017	2.17745	7.00033	0.24685	7.00033	4.35595
7.0085	0.27735	7.00867	4.8954	7.00833	2.3797	7.00867	8.07215	7.00833	3.0071	7.0085	2.09365	7.00867	0.2326	7.00867	4.49335
7.01683	0.26915	7.017	4.68365	7.01667	2.32135	7.017	7.9965	7.01667	2.98965	7.01683	2.01275	7.017	0.2211	7.017	4.56635
7.02517	0.2606	7.02533	4.48155	7.025	2.25885	7.02533	7.94765	7.025	2.97745	7.02517	1.9324	7.02533	0.21265	7.02533	4.5567
7.0335	0.2558	7.03367	4.29155	7.03333	2.1961	7.03367	7.92695	7.03333	2.97995	7.0335	1.8619	7.03367	0.20155	7.03367	4.46595
7.04183	0.25065	7.042	4.10875	7.04167	2.13095	7.042	7.91655	7.04167	2.98685	7.04183	1.7979	7.042	0.1917	7.042	4.2969
7.05017	0.24795	7.05033	3.9384	7.05	2.0725	7.05033	7.90315	7.05	2.99775	7.05017	1.7445	7.05033	0.1838	7.05033	4.07445
7.0585	0.24535	7.05867	3.78045	7.05833	2.0162	7.05867	7.8499	7.05833	3.00105	7.0585	1.70175	7.05867	0.17585	7.05867	3.81825
7.06683	0.24435	7.067	3.6347	7.06667	1.9691	7.067	7.73675	7.06667	2.9909	7.06683	1.6717	7.067	0.1529	7.067	3.5525
7.07517	0.2435	7.07533	3.49605	7.075	1.92695	7.07533	7.54625	7.075	2.95465	7.07517	1.6518	7.07533	0.16435	7.07533	3.2893
7.0835	0.2411	7.08367	3.3661	7.08333	1.8933	7.08367	7.28165	7.08333	2.88985	7.0835	1.64245	7.08367	0.1673	7.08367	3.04655
7.09183	0.238	7.092	3.2504	7.09167	1.8705	7.092	6.9556	7.09167	2.8014	7.09183	1.64475	7.092	0.13855	7.092	2.82835
7.10017	0.23245	7.10033	3.13905	7.1	1.85415	7.10033	6.5864	7.1	2.6929	7.10017	1.65315	7.10033	0.13255	7.10033	2.6362
7.1085	0.2268	7.10867	3.03445	7.10833	1.84785	7.10867	6.20155	7.10833	2.57115	7.1085	1.671	7.10867	0.12425	7.10867	2.47195
7.11683	0.2158	7.117	2.93865	7.11667	1.85075	7.117	5.82045	7.11667	2.44655	7.11683	1.6908	7.117	0.11605	7.117	2.3353
7.12517	0.21015	7.12533	2.84875	7.125	1.8642	7.12533	5.4605	7.125	2.32805	7.12517	1.7157	7.12533	0.1101	7.12533	2.2251
7.1335	0.2013	7.13367	2.76085	7.13333	1.8817	7.13367	5.13055	7.13333	2.21345	7.1335	1.7382	7.13367	0.10185	7.13367	2.13425
7.14183	0.19325	7.142	2.6791	7.14167	1.90565	7.142	4.8377	7.14167	2.11555	7.14183	1.75965	7.142	0.0952	7.142	2.065
7.15017	0.1859	7.15033	2.60375	7.15	1.9346	7.15033	4.58415	7.15	2.0338	7.15017	1.7796	7.15033	0.0888	7.15033	2.01145
7.1585	0.1791	7.15867	2.5301	7.15833	1.96205	7.15867	4.36395	7.15833	1.96725	7.1585	1.79095	7.15867	0.08585	7.15867	1.96835
7.16683	0.17365	7.167	2.46045	7.16667	1.98925	7.167	4.1782	7.16667	1.91705	7.16683	1.79595	7.167	0.0774	7.167	1.93655
7.17517	0.1683	7.17533	2.395	7.175	2.0122	7.17533	4.0237	7.175	1.8812	7.17517	1.794	7.17533	0.07005	7.17533	1.9114
7.1835	0.16585	7.18367	2.3334	7.18333	2.02735	7.18367	3.8957	7.18333	1.86165	7.1835	1.78295	7.18367	0.06385	7.18367	1.889
7.19183	0.16215	7.192	2.2722	7.19167	2.034	7.192	3.7879	7.19167	1.8523	7.19183	1.7611	7.192	0.0554	7.192	1.8684
7.20017	0.1586	7.20033	2.21485	7.2	2.0325	7.20033	3.69945	7.2	1.85215	7.20017	1.73205	7.20033	0.04865	7.20033	1.84935
7.2085	0.15505	7.20867	2.16035	7.20833	2.0188	7.20867	3.62715	7.20833	1.85865	7.2085	1.69725	7.20867	0.0433	7.20867	1.82625
7.21683	0.1528	7.217	2.10875	7.21667	1.99605	7.217	3.5661	7.21667	1.86965	7.21683	1.65335	7.217	0.03625	7.217	1.8012
7.22517	0.15145	7.22533	2.0594	7.225	1.9629	7.22533	3.5117	7.225	1.8813	7.22517	1.606	7.22533	0.0304	7.22533	1.7723
7.2335	0.1482	7.23367	2.0114	7.23333	1.92145	7.23367	3.46235	7.23333	1.89	7.2335	1.55635	7.23367	0.02415	7.23367	1.73925
7.24183	0.148	7.242	1.96675	7.24167	1.8751	7.242	3.4157	7.24167	1.8965	7.24183	1.50455	7.242	0.02125	7.242	1.70435
7.25017	0.1473	7.25033	1.9231	7.25	1.82045	7.25033	3.36775	7.25	1.8983	7.25017	1.4533	7.25033	0.01925	7.25033	1.66775
7.2585	0.1473	7.25867	1.88425	7.25833	1.76475	7.25867	3.31995	7.25833	1.89425	7.2585	1.4035	7.25867	0.01855	7.25867	1.6262
7.26683	0.14565	7.267	1.84405	7.26667	1.70345	7.267	3.26585	7.26667	1.88035	7.26683	1.3529	7.267	0.0197	7.267	1.58125
7.27517	0.14555	7.27533	1.8074	7.275	1.64355	7.27533	3.20865	7.275	1.8608	7.27517	1.3065	7.27533	0.02165	7.27533	1.53425
7.2835	0.1451	7.28367	1.7698	7.28333	1.5822	7.28367	3.1471	7.28333	1.83205	7.2835	1.2604	7.28367	0.02225	7.28367	1.4858
7.29183	0.1434	7.292	1.7367	7.29167	1.5236	7.292	3.0838	7.29167	1.8004	7.29183	1.21825	7.292	0.0235	7.292	1.4388
7.30017	0.14205	7.30033	1.7031	7.3	1.4636	7.30033	3.01245	7.3	1.75765	7.30017	1.1787	7.30033	0.0217	7.30033	1.39105
7.3085	0.14035	7.30867	1.67135	7.30833	1.4087	7.30867	2.9406	7.30833	1.7146	7.3085	1.1425	7.30867	0.02625	7.30867	1.34395
7.31683	0.1394	7.317	1.6414	7.31667	1.3571	7.317	2.86705	7.31667	1.6688	7.31683	1.1102	7.317	0.0241	7.317	1.303
7.32517	0.138	7.32533	1.61155	7.325	1.30975	7.32533	2.79225	7.325	1.6187	7.32517	1.0783	7.32533	0.02425	7.32533	1.26585
7.3335	0.1352	7.33367	1.5845	7.33333	1.26545	7.33367	2.71615	7.33333	1.56925	7.3335	1.0499	7.33367	0.0241	7.33367	1.23455
7.34183	0.1348	7.342	1.5585	7.34167	1.2259	7.342	2.6416	7.34167	1.52075	7.34183	1.02585	7.342	0.0203	7.342	1.21015
7.35017	0.1344	7.35033	1.534	7.35	1.18735	7.35033	2.56785	7.35	1.4728	7.35017	1.0046	7.35033	0.02145	7.35033	1.1934
7.3585	0.13395	7.35867	1.5101	7.35833	1.15575	7.35867	2.49775	7.35833	1.42605	7.3585	0.984	7.35867	0.0174	7.35867	1.1809
7.36683	0.13235	7.367	1.48465	7.36667	1.12605	7.367	2.4313	7.36667	1.38095	7.36683	0.9663	7.367	0.0119	7.367	1.17155
7.37517	0.13155	7.37533	1.4612	7.375	1.09765	7.37533	2.3675	7.375	1.33625	7.37517	0.95025	7.37533	0.0127	7.37533	1.1636
7.3835	0.13265	7.38367	1.44135	7.38333	1.0764	7.38367	2.3128	7.38333	1.29865	7.3835	0.9378	7.38367	0.0082	7.38367	1.1597
7.39183	0.13085	7.392	1.41945	7.39167	1.0541	7.392	2.26055	7.39167	1.2598	7.39183	0.9255	7.392	0.00665	7.392	1.14945
7.40017	0.13245	7.40033	1.4002	7.4	1.03685	7.40033	2.2167	7.4	1.22615	7.40017	0.9168	7.40033	0.0034	7.40033	1.13875
7.4085	0.13215	7.40867	1.38025	7.40833	1.02005	7.40867	2.1759	7.40833	1.19335	7.4085	0.90855	7.40867	-0.00225	7.40867	1.12075
7.41683	0.13145	7.417	1.36025	7.41667	1.00375	7.417	2.1414	7.41667	1.16295	7.41683	0.9007	7.417	-0.0062	7.417	1.0993
7.42517	0.1324	7.42533	1.34195	7.425	0.9902	7.42533	2.1118	7.425	1.13585	7.42517	0.89245	7.42533	-0.01235	7.42533	1.07385
7.4335	0.13525	7.43367	1.3275	7.43333	0.98145	7.43367	2.08645	7.43333	1.1132	7.4335	0.88835	7.43367	-0.01725	7.43367	1.0482
7.44183	0.13485	7.442	1.31015	7.44167	0.97245	7.442	2.06325	7.44167	1.09245	7.44183	0.87975	7.442	-0.02225	7.442	1.02175
7.45017	0.1377	7.45033	1.29485	7.45	0.965	7.45033	2.04165	7.45	1.073	7.45017	0.8728	7.45033	-0.0263	7.45033	0.99475
7.4585	0.13845	7.45867	1.2775	7.45833	0.95535	7.45867	2.01775	7.45833	1.05445	7.4585	0.86315	7.45867	-0.0262	7.45867	0.96745
7.46683	0.1417	7.467	1.26265	7.46667	0.94685	7.467	1.9972	7.46667	1.03945	7.46683	0.855	7.467	-0.02165	7.467	0.9433
7.47517	0.142	7.47533	1.2472	7.475	0.93955	7.47533	1.97395	7.475	1.0256	7.47517	0.8459	7.47533	-0.01065	7.47533	0.91925
7.4835	0.1436	7.48367	1.23265	7.48333	0.92995	7.48367	1.94845	7.48333	1.01485	7.4835	0.8346	7.48367	0.0098	7.48367	0.8982
7.49183	0.145	7.492	1.21955	7.49167	0.9207	7.492	1.9223	7.49167	1.00395	7.49183	0.8257	7.492	0.04285	7.492	0.8774
7.50017	0.14525	7.50033	1.2032	7.5	0.91035	7.50033	1.89375	7.5	0.9942	7.50017	0.8132	7.50033	0.08675	7.50033	0.8582
7.5085	0.14765	7.50867	1.18995	7.50833	0.89945	7.50867	1.86625	7.50833	0.9845	7.5085	0.8021	7.50867	0.1447	7.50867	0.83985
7.51683	0.1461	7.517	1.17705	7.51667	0.89065	7.517	1.83865	7.51667	0.9762	7.51683	0.7912	7.517	0.21595	7.517	0.82275
7.52517	0.14585	7.52533	1.1615	7.525	0.88	7.52533	1.81095	7.525	0.9673	7.52517	0.7776	7.52533	0.2923	7.52533	0.80405
7.5335	0.14505	7.53367	1.149	7.53333	0.8692	7.53367	1.78385	7.53333	0.9598	7.5335	0.76545	7.53367	0.36945	7.53367	0.78675
7.54183	0.1451	7.542	1.13545	7.54167	0.8604	7.542	1.7587	7.54167	0.95115	7.54183	0.7547	7.542	0.4414	7.542	0.77125
7.55017	0.14615	7.55033	1.1223	7.55	0.8501	7.55033	1.7345	7.55	0.9412	7.55017	0.7446	7.55033	0.4999	7.55033	0.75445
7.5585	0.14465	7.55867	1.1093	7.55833	0.83995	7.55867	1.71	7.55833	0.93135	7.5585	0.7451	7.55867	0.5352	7.55867	0.7391
7.56683	0.1434	7.567	1.0967	7.56667	0.8298	7.567	1.6867	7.56667	0.9217	7.56683	0.7269	7.567	0.55435	7.567	0.7232
7.57517	0.14125	7.57533	1.0839	7.575	0.8214	7.57533	1.66325	7.575	0.91175	7.57517	0.7184	7.57533	0.54925	7.57533	0.70855
7.5835	0.14025	7.58367	1.07	7.58333	0.8124	7.58367	1.6418	7.58333	0.9009	7.5835	0.71455	7.58367	0.5263	7.58367	0.695
7.59183	0.13895	7.592	1.0584	7.59167	0.80305	7.592	1.62145	7.59167	0.89165	7.59183	0.70975	7.592	0.4902	7.592	0.6811
7.60017	0.13795	7.60033	1.0469	7.6	0.795	7.60033	1.60255	7.6	0.87905	7.60017	0.7063	7.60033	0.44125	7.60033	0.6682
7.6085	0.13675	7.60867	1.0363	7.60833	0.7873	7.60867	1.5835	7.60833	0.86915	7.6085	0.7044	7.60867	0.38835	7.60867	0.6555
7.61683	0.13545	7.617	1.02745	7.61667	0.7807	7.617	1.5661	7.61667	0.85825	7.61683	0.70105	7.617	0.33435	7.617	0.645
7.62517	0.13475	7.62533	1.019	7.625	0.7749	7.62533	1.54825	7.625	0.84935	7.62517	0.69995	7.62533	0.2788	7.62533	0.63735
7.6335	0.13225	7.63367	1.0087	7.63333	0.76795	7.63367	1.52955	7.63333	0.8366	7.6335	0.6954	7.63367	0.2272	7.63367	0.62735
7.64183	0.12995	7.642	1.00165	7.64167	0.7648	7.642	1.5135	7.64167	0.82675	7.64183	0.6945	7.642	0.17885	7.642	0.62
7.65017	0.12905	7.65033	0.9929	7.65	0.76085	7.65033	1.4975	7.65	0.8164	7.65017	0.69165	7.65033	0.1366	7.65033	0.6166
7.6585	0.12645	7.65867	0.98295	7.65833	0.7545	7.65867	1.4809	7.65833	0.80185	7.6585	0.6864	7.65867	0.09715	7.65867	0.6105
7.66683	0.1268	7.667	0.97455	7.66667	0.75135	7.667	1.46935	7.66667	0.79315	7.66683	0.68565	7.667	0.06525	7.667	0.60715
7.67517	0.12395	7.67533	0.9654	7.675	0.7469	7.67533	1.4568	7.675	0.78305	7.67517	0.6822	7.67533	0.0334	7.67533	0.60475
7.6835	0.1223	7.68367	0.9566	7.68333	0.7417	7.68367	1.4458	7.68333	0.7757	7.6835	0.67935	7.68367	0.00975	7.68367	0.6003
7.69183	0.12445	7.692	0.9507	7.69167	0.7406	7.692	1.44095	7.69167	0.77155	7.69183	0.67665	7.692	-0.01295	7.692	0.59895
7.70017	0.12295	7.70033	0.9415	7.7	0.73615	7.70033	1.43455	7.7	0.76705	7.70017	0.67545	7.70033	-0.0325	7.70033	0.597
7.7085	0.1216	7.70867	0.93265	7.70833	0.73135	7.70867	1.4293	7.70833	0.7644	7.7085	0.6717	7.70867	-0.048	7.70867	0.5946
7.71683	0.1222	7.717	0.9264	7.71667	0.72835	7.717	1.4247	7.71667	0.7627	7.71683	0.67075	7.717	-0.05835	7.717	0.59355
7.72517	0.1222	7.72533	0.91825	7.725	0.7247	7.72533	1.41895	7.725	0.7631	7.72517	0.6683	7.72533	-0.06975	7.72533	0.5938
7.7335	0.1229	7.73367	0.9098	7.73333	0.72325	7.73367	1.41515	7.73333	0.7617	7.7335	0.66695	7.73367	-0.0777	7.73367	0.59385
7.74183	0.124	7.742	0.90335	7.74167	0.7197	7.742	1.4097	7.74167	0.7603	7.74183	0.66225	7.742	-0.0816	7.742	0.59575
7.75017	0.1233	7.75033	0.89505	7.75	0.71565	7.75033	1.4022	7.75	0.75815	7.75017	0.65995	7.75033	-0.0869	7.75033	0.59755
7.7585	0.1215	7.75867	0.8862	7.75833	0.7108	7.75867	1.3942	7.75833	0.7543	7.7585	0.65465	7.75867	-0.09845	7.75867	0.5981
7.76683	0.123	7.767	0.88045	7.76667	0.70855	7.767	1.3888	7.76667	0.7538	7.76683	0.6527	7.767	-0.10095	7.767	0.6006
7.77517	0.12285	7.77533	0.87265	7.775	0.7051	7.77533	1.38295	7.775	0.7487	7.77517	0.6483	7.77533	-0.10435	7.77533	0.6008
7.7835	0.1233	7.78367	0.8656	7.78333	0.70025	7.78367	1.37515	7.78333	0.74375	7.7835	0.6451	7.78367	-0.10525	7.78367	0.60065
7.79183	0.12095	7.792	0.85795	7.79167	0.6975	7.792	1.3684	7.79167	0.74	7.79183	0.64375	7.792	-0.1109	7.792	0.59745
7.80017	0.12155	7.80033	0.8513	7.8	0.6954	7.80033	1.35985	7.8	0.7356	7.80017	0.64465	7.80033	-0.114	7.80033	0.5941
7.8085	0.1221	7.80867	0.84625	7.80833	0.6918	7.80867	1.35265	7.80833	0.7315	7.8085	0.6497	7.80867	-0.1166	7.80867	0.59025
7.81683	0.1227	7.817	0.83945	7.81667	0.68995	7.817	1.3459	7.81667	0.7287	7.81683	0.6572	7.817	-0.1179	7.817	0.5848
7.82517	0.12145	7.82533	0.8316	7.825	0.6865	7.82533	1.3371	7.825	0.7235	7.82517	0.66905	7.82533	-0.1199	7.82533	0.5773
7.8335	0.1226	7.83367	0.8282	7.83333	0.6854	7.83367	1.3284	7.83333	0.72035	7.8335	0.6921	7.83367	-0.12535	7.83367	0.5725
7.84183	0.12015	7.842	0.82165	7.84167	0.68305	7.842	1.3203	7.84167	0.71705	7.84183	0.721	7.842	-0.127	7.842	0.56535
7.85017	0.1228	7.85033	0.81715	7.85	0.68225	7.85033	1.31225	7.85	0.7132	7.85017	0.758	7.85033	-0.131	7.85033	0.56415
7.8585	0.12155	7.85867	0.81205	7.85833	0.6805	7.85867	1.30245	7.85833	0.71125	7.8585	0.802	7.85867	-0.13175	7.85867	0.5679
7.86683	0.12055	7.867	0.8081	7.86667	0.67815	7.867	1.2936	7.86667	0.70745	7.86683	0.84965	7.867	-0.1332	7.867	0.57795
7.87517	0.11955	7.87533	0.8019	7.875	0.6764	7.87533	1.28475	7.875	0.70255	7.87517	0.898	7.87533	-0.13565	7.87533	0.6008
7.8835	0.1198	7.88367	0.799	7.88333	0.6757	7.88367	1.278	7.88333	0.6987	7.8835	0.94325	7.88367	-0.1376	7.88367	0.6418
7.89183	0.12035	7.892	0.7958	7.89167	0.6766	7.892	1.27195	7.89167	0.6971	7.89183	0.98205	7.892	-0.13415	7.892	0.705
7.90017	0.1207	7.90033	0.7949	7.9	0.67905	7.90033	1.2689	7.9	0.6964	7.90017	1.01	7.90033	-0.1392	7.90033	0.7928
7.9085	0.1183	7.90867	0.79095	7.90833	0.6767	7.90867	1.2658	7.90833	0.6924	7.9085	1.0209	7.90867	-0.14065	7.90867	0.90915
7.91683	0.1198	7.917	0.78985	7.91667	0.67735	7.917	1.26895	7.91667	0.69255	7.91683	1.02125	7.917	-0.1428	7.917	1.05485
7.92517	0.12065	7.92533	0.78725	7.925	0.6777	7.92533	1.2771	7.925	0.6913	7.92517	1.0065	7.92533	-0.145	7.92533	1.22015
7.9335	0.12135	7.93367	0.7843	7.93333	0.6756	7.93367	1.2895	7.93333	0.6919	7.9335	0.9808	7.93367	-0.14595	7.93367	1.39865
7.94183	0.11965	7.942	0.77935	7.94167	0.67275	7.942	1.3079	7.94167	0.6922	7.94183	0.94705	7.942	-0.148	7.942	1.58015
7.95017	0.1203	7.95033	0.7742	7.95	0.6699	7.95033	1.33635	7.95	0.69355	7.95017	0.908	7.95033	-0.15355	7.95033	1.7464
7.9585	0.1209	7.95867	0.7671	7.95833	0.66515	7.95867	1.37085	7.95833	0.696	7.9585	0.8668	7.95867	-0.1547	7.95867	1.8876
7.96683	0.1234	7.967	0.76145	7.96667	0.6604	7.967	1.41255	7.96667	0.6999	7.96683	0.82725	7.967	-0.1593	7.967	1.99265
7.97517	0.1213	7.97533	0.754	7.975	0.653	7.97533	1.455	7.975	0.7036	7.97517	0.78815	7.97533	-0.1635	7.97533	2.057
7.9835	0.1218	7.98367	0.7451	7.98333	0.6459	7.98367	1.5004	7.98333	0.70895	7.9835	0.75215	7.98367	-0.16615	7.98367	2.0786
7.99183	0.1234	7.992	0.73715	7.99167	0.63915	7.992	1.5427	7.99167	0.71215	7.99183	0.71975	7.992	-0.17115	7.992	2.06185
8.00017	0.12405	8.00033	0.7318	8	0.6324	8.00033	1.57805	8	0.7171	8.00017	0.69335	8.00033	-0.17395	8.00033	2.0104
8.0085	0.12565	8.00867	0.7234	8.00833	0.62595	8.00867	1.60555	8.00833	0.7185	8.0085	0.6671	8.00867	-0.1762	8.00867	1.933
8.01683	0.1263	8.017	0.71615	8.01667	0.6179	8.017	1.62095	8.01667	0.72005	8.01683	0.64695	8.017	-0.1816	8.017	1.8348
8.02517	0.12795	8.02533	0.70825	8.025	0.61045	8.02533	1.62475	8.025	0.71665	8.02517	0.62685	8.02533	-0.1842	8.02533	1.72255
8.0335	0.1297	8.03367	0.70355	8.03333	0.6074	8.03367	1.61955	8.03333	0.7146	8.0335	0.61405	8.03367	-0.1887	8.03367	1.60435
8.04183	0.12835	8.042	0.6983	8.04167	0.6017	8.042	1.6025	8.04167	0.709	8.04183	0.60165	8.042	-0.19175	8.042	1.4827
8.05017	0.12805	8.05033	0.69185	8.05	0.5969	8.05033	1.57925	8.05	0.70165	8.05017	0.5902	8.05033	-0.1961	8.05033	1.359
8.0585	0.1283	8.05867	0.68735	8.05833	0.59285	8.05867	1.5488	8.05833	0.6922	8.0585	0.5811	8.05867	-0.19535	8.05867	1.24085
8.06683	0.128	8.067	0.6824	8.06667	0.59165	8.067	1.51585	8.06667	0.6853	8.06683	0.57315	8.067	-0.19825	8.067	1.13275
8.07517	0.12615	8.07533	0.6775	8.075	0.5878	8.07533	1.4781	8.075	0.6749	8.07517	0.56595	8.07533	-0.19925	8.07533	1.03085
8.0835	0.125	8.08367	0.67115	8.08333	0.58555	8.08367	1.43845	8.08333	0.66515	8.0835	0.5604	8.08367	-0.20065	8.08367	0.9404
8.09183	0.1233	8.092	0.6679	8.09167	0.5852	8.092	1.3999	8.09167	0.65745	8.09183	0.5557	8.092	-0.20285	8.092	0.85895
8.10017	0.1228	8.10033	0.66355	8.1	0.583	8.10033	1.3601	8.1	0.64855	8.10017	0.5511	8.10033	-0.20295	8.10033	0.78995
8.1085	0.12145	8.10867	0.65935	8.10833	0.5825	8.10867	1.3245	8.10833	0.6425	8.1085	0.54765	8.10867	-0.2036	8.10867	0.73125
8.11683	0.12235	8.117	0.6562	8.11667	0.58255	8.117	1.28995	8.11667	0.6349	8.11683	0.544	8.117	-0.20185	8.117	0.68
8.12517	0.121	8.12533	0.6527	8.125	0.5819	8.12533	1.258	8.125	0.6299	8.12517	0.54085	8.12533	-0.1967	8.12533	0.63685
8.1335	0.11965	8.13367	0.6476	8.13333	0.58065	8.13367	1.22815	8.13333	0.62275	8.1335	0.53705	8.13367	-0.1931	8.13367	0.60075
8.14183	0.1175	8.142	0.6418	8.14167	0.57795	8.142	1.2028	8.14167	0.6176	8.14183	0.5329	8.142	-0.19295	8.142	0.5693
8.15017	0.1185	8.15033	0.6404	8.15	0.57845	8.15033	1.18095	8.15	0.61455	8.15017	0.53045	8.15033	-0.18515	8.15033	0.5456
8.1585	0.1161	8.15867	0.634	8.15833	0.57425	8.15867	1.1591	8.15833	0.6089	8.1585	0.52575	8.15867	-0.1801	8.15867	0.5234
8.16683	0.11505	8.167	0.6321	8.16667	0.57305	8.167	1.1434	8.16667	0.60585	8.16683	0.52285	8.167	-0.17425	8.167	0.50395
8.17517	0.1131	8.17533	0.6263	8.175	0.57005	8.17533	1.12635	8.175	0.60185	8.17517	0.519	8.17533	-0.1669	8.17533	0.4879
8.1835	0.11455	8.18367	0.6248	8.18333	0.56755	8.18367	1.11375	8.18333	0.60105	8.1835	0.518	8.18367	-0.15865	8.18367	0.47725
8.19183	0.1143	8.192	0.6191	8.19167	0.5635	8.192	1.10195	8.19167	0.59735	8.19183	0.51345	8.192	-0.1511	8.192	0.46535
8.20017	0.11365	8.20033	0.6154	8.2	0.5613	8.20033	1.0921	8.2	0.59515	8.20017	0.50975	8.20033	-0.1403	8.20033	0.45465
8.2085	0.11435	8.20867	0.6123	8.20833	0.5586	8.20867	1.0841	8.20833	0.59225	8.2085	0.5074	8.20867	-0.1372	8.20867	0.44595
8.21683	0.11355	8.217	0.60755	8.21667	0.5535	8.217	1.07415	8.21667	0.58825	8.21683	0.5041	8.217	-0.1334	8.217	0.43965
8.22517	0.11445	8.22533	0.60685	8.225	0.5515	8.22533	1.0692	8.225	0.58835	8.22517	0.5026	8.22533	-0.12865	8.22533	0.4344
8.2335	0.11515	8.23367	0.6027	8.23333	0.54525	8.23367	1.0611	8.23333	0.58315	8.2335	0.50035	8.23367	-0.1276	8.23367	0.4271
8.24183	0.11515	8.242	0.59915	8.24167	0.54225	8.242	1.05465	8.24167	0.58245	8.24183	0.4994	8.242	-0.126	8.242	0.42185
8.25017	0.11565	8.25033	0.5958	8.25	0.5387	8.25033	1.0486	8.25	0.5802	8.25017	0.495	8.25033	-0.12845	8.25033	0.41665
8.2585	0.11405	8.25867	0.5914	8.25833	0.5355	8.25867	1.04235	8.25833	0.5758	8.2585	0.49285	8.25867	-0.12825	8.25867	0.4127
8.26683	0.1142	8.267	0.58915	8.26667	0.53115	8.267	1.03565	8.26667	0.5724	8.26683	0.4916	8.267	-0.1312	8.267	0.40575
8.27517	0.1131	8.27533	0.5852	8.275	0.5275	8.27533	1.0317	8.275	0.57015	8.27517	0.48875	8.27533	-0.1396	8.27533	0.4
8.2835	0.11515	8.28367	0.58465	8.28333	0.52695	8.28367	1.02875	8.28333	0.56815	8.2835	0.49005	8.28367	-0.1465	8.28367	0.397
8.29183	0.11535	8.292	0.58115	8.29167	0.5249	8.292	1.02385	8.29167	0.5654	8.29183	0.4887	8.292	-0.1535	8.292	0.39325
8.30017	0.11655	8.30033	0.58095	8.3	0.52335	8.30033	1.02165	8.3	0.56445	8.30017	0.4896	8.30033	-0.16265	8.30033	0.39
8.3085	0.11585	8.30867	0.57785	8.30833	0.52235	8.30867	1.01755	8.30833	0.56065	8.3085	0.4905	8.30867	-0.17165	8.30867	0.3873
8.31683	0.11705	8.317	0.5752	8.31667	0.52115	8.317	1.013	8.31667	0.55735	8.31683	0.49225	8.317	-0.17875	8.317	0.38335
8.32517	0.11735	8.32533	0.5729	8.325	0.5215	8.32533	1.00925	8.325	0.5575	8.32517	0.49465	8.32533	-0.18655	8.32533	0.3823
8.3335	0.1186	8.33367	0.57125	8.33333	0.5224	8.33367	1.0062	8.33333	0.55575	8.3335	0.49615	8.33367	-0.19305	8.33367	0.3794
8.34183	0.11725	8.342	0.5671	8.34167	0.52175	8.342	1.00285	8.34167	0.55225	8.34183	0.49845	8.342	-0.198	8.342	0.3776
8.35017	0.11695	8.35033	0.5643	8.35	0.52075	8.35033	0.99825	8.35	0.54995	8.35017	0.5006	8.35033	-0.20265	8.35033	0.3732
8.3585	0.11805	8.35867	0.56475	8.35833	0.52465	8.35867	0.9958	8.35833	0.5508	8.3585	0.50385	8.35867	-0.20205	8.35867	0.37165
8.36683	0.1197	8.367	0.5626	8.36667	0.52705	8.367	0.9943	8.36667	0.5503	8.36683	0.5052	8.367	-0.19925	8.367	0.3713
8.37517	0.12015	8.37533	0.562	8.375	0.52965	8.37533	0.9928	8.375	0.55165	8.37517	0.50935	8.37533	-0.1934	8.37533	0.37155
8.3835	0.12135	8.38367	0.56065	8.38333	0.5338	8.38367	0.99025	8.38333	0.55005	8.3835	0.5092	8.38367	-0.1742	8.38367	0.37065
8.39183	0.12155	8.392	0.5571	8.39167	0.53455	8.392	0.98675	8.39167	0.548	8.39183	0.51035	8.392	-0.14	8.392	0.3708
8.40017	0.122	8.40033	0.5537	8.4	0.5353	8.40033	0.98615	8.4	0.5478	8.40017	0.5113	8.40033	-0.0901	8.40033	0.3736
8.4085	0.12555	8.40867	0.55395	8.40833	0.53885	8.40867	0.9864	8.40833	0.5509	8.4085	0.51345	8.40867	-0.01355	8.40867	0.37725
8.41683	0.1273	8.417	0.55145	8.41667	0.5418	8.417	0.9854	8.41667	0.55185	8.41683	0.5131	8.417	0.09795	8.417	0.3826
8.42517	0.12695	8.42533	0.54725	8.425	0.54055	8.42533	0.9826	8.425	0.55265	8.42517	0.51085	8.42533	0.243	8.42533	0.3855
8.4335	0.1288	8.43367	0.54575	8.43333	0.5405	8.43367	0.98135	8.43333	0.5536	8.4335	0.5072	8.43367	0.42795	8.43367	0.3906
8.44183	0.1297	8.442	0.5428	8.44167	0.5395	8.442	0.97945	8.44167	0.55455	8.44183	0.5041	8.442	0.6428	8.442	0.3967
8.45017	0.13105	8.45033	0.5379	8.45	0.537	8.45033	0.97785	8.45	0.5531	8.45017	0.49875	8.45033	0.87965	8.45033	0.40205
8.4585	0.1302	8.45867	0.5354	8.45833	0.5346	8.45867	0.97555	8.45833	0.5527	8.4585	0.49485	8.45867	1.11985	8.45867	0.4091
8.46683	0.1311	8.467	0.5326	8.46667	0.5326	8.467	0.97635	8.46667	0.5543	8.46683	0.491	8.467	1.3388	8.467	0.41735
8.47517	0.13225	8.47533	0.5301	8.475	0.52965	8.47533	0.97415	8.475	0.5546	8.47517	0.48685	8.47533	1.5219	8.47533	0.42665
8.4835	0.13345	8.48367	0.52625	8.48333	0.52645	8.48367	0.97365	8.48333	0.5527	8.4835	0.48325	8.48367	1.64725	8.48367	0.43535
8.49183	0.1331	8.492	0.5232	8.49167	0.5192	8.492	0.9724	8.49167	0.55055	8.49183	0.47695	8.492	1.7106	8.492	0.4466
8.50017	0.1337	8.50033	0.5212	8.5	0.5161	8.50033	0.96935	8.5	0.54955	8.50017	0.4739	8.50033	1.7045	8.50033	0.4604
8.5085	0.1343	8.50867	0.51845	8.50833	0.51275	8.50867	0.9677	8.50833	0.549	8.5085	0.4723	8.50867	1.6404	8.50867	0.4789
8.51683	0.13475	8.517	0.51395	8.51667	0.50725	8.517	0.96475	8.51667	0.54465	8.51683	0.4698	8.517	1.52225	8.517	0.49745
8.52517	0.1335	8.52533	0.5109	8.525	0.5035	8.52533	0.96285	8.525	0.54435	8.52517	0.46725	8.52533	1.36925	8.52533	0.52005
8.5335	0.1344	8.53367	0.5083	8.53333	0.49825	8.53367	0.9573	8.53333	0.54065	8.5335	0.4667	8.53367	1.19845	8.53367	0.54145
8.54183	0.13465	8.542	0.506	8.54167	0.4958	8.542	0.9542	8.54167	0.5386	8.54183	0.46575	8.542	1.01675	8.542	0.5653
8.55017	0.13595	8.55033	0.50515	8.55	0.49325	8.55033	0.9487	8.55	0.53545	8.55017	0.46725	8.55033	0.83905	8.55033	0.5839
8.5585	0.13665	8.55867	0.5027	8.55833	0.4906	8.55867	0.9447	8.55833	0.5308	8.5585	0.4682	8.55867	0.6668	8.55867	0.59875
8.56683	0.13605	8.567	0.5	8.56667	0.4871	8.567	0.93775	8.56667	0.5259	8.56683	0.46825	8.567	0.50665	8.567	0.60385
8.57517	0.13665	8.57533	0.4988	8.575	0.48645	8.57533	0.9347	8.575	0.52175	8.57517	0.46925	8.57533	0.36715	8.57533	0.6045
8.5835	0.13655	8.58367	0.4972	8.58333	0.48405	8.58367	0.92905	8.58333	0.5181	8.5835	0.4709	8.58367	0.2431	8.58367	0.5967
8.59183	0.13595	8.592	0.49435	8.59167	0.4824	8.592	0.92185	8.59167	0.5128	8.59183	0.4716	8.592	0.1396	8.592	0.58135
8.60017	0.13785	8.60033	0.49545	8.6	0.48525	8.60033	0.9207	8.6	0.51025	8.60017	0.47575	8.60033	0.05275	8.60033	0.5648
8.6085	0.1369	8.60867	0.49265	8.60833	0.483	8.60867	0.91365	8.60833	0.5054	8.6085	0.4772	8.60867	-0.0208	8.60867	0.54155
8.61683	0.13675	8.617	0.4905	8.61667	0.48325	8.617	0.90975	8.61667	0.5012	8.61683	0.4807	8.617	-0.0785	8.617	0.51635
8.62517	0.1369	8.62533	0.49015	8.625	0.4859	8.62533	0.9058	8.625	0.4988	8.62517	0.48445	8.62533	-0.1244	8.62533	0.4926
8.6335	0.1367	8.63367	0.4872	8.63333	0.48755	8.63367	0.903	8.63333	0.49545	8.6335	0.48755	8.63367	-0.1593	8.63367	0.469
8.64183	0.1367	8.642	0.48515	8.64167	0.488	8.642	0.8992	8.64167	0.491	8.64183	0.49125	8.642	-0.18855	8.642	0.44665
8.65017	0.13525	8.65033	0.4816	8.65	0.4896	8.65033	0.8961	8.65	0.48655	8.65017	0.4965	8.65033	-0.2101	8.65033	0.4259
8.6585	0.1368	8.65867	0.4793	8.65833	0.49345	8.65867	0.89535	8.65833	0.4856	8.6585	0.50255	8.65867	-0.22415	8.65867	0.408
8.66683	0.1382	8.667	0.4759	8.66667	0.49905	8.667	0.89515	8.66667	0.4848	8.66683	0.5107	8.667	-0.23565	8.667	0.3943
8.67517	0.1376	8.67533	0.4747	8.675	0.50565	8.67533	0.8951	8.675	0.484	8.67517	0.5179	8.67533	-0.2393	8.67533	0.38275
8.6835	0.1383	8.68367	0.46935	8.68333	0.51075	8.68367	0.89455	8.68333	0.4819	8.6835	0.5238	8.68367	-0.24355	8.68367	0.37315
8.69183	0.14135	8.692	0.4691	8.69167	0.51945	8.692	0.8978	8.69167	0.48315	8.69183	0.53085	8.692	-0.246	8.692	0.3654
8.70017	0.14045	8.70033	0.46355	8.7	0.5272	8.70033	0.89805	8.7	0.48325	8.70017	0.5355	8.70033	-0.24465	8.70033	0.35965
8.7085	0.13955	8.70867	0.4591	8.70833	0.53445	8.70867	0.8983	8.70833	0.48065	8.7085	0.5378	8.70867	-0.24485	8.70867	0.35375
8.71683	0.14085	8.717	0.45635	8.71667	0.54465	8.717	0.8987	8.71667	0.48375	8.71683	0.5427	8.717	-0.24355	8.717	0.3525
8.72517	0.1407	8.72533	0.4547	8.725	0.5524	8.72533	0.8995	8.725	0.4831	8.72517	0.5466	8.72533	-0.2413	8.72533	0.3515
8.7335	0.14045	8.73367	0.45185	8.73333	0.56055	8.73367	0.89805	8.73333	0.48435	8.7335	0.5464	8.73367	-0.23985	8.73367	0.3522
8.74183	0.13885	8.742	0.449	8.74167	0.5673	8.742	0.8963	8.74167	0.4865	8.74183	0.5466	8.742	-0.2402	8.742	0.35195
8.75017	0.1382	8.75033	0.44475	8.75	0.57355	8.75033	0.89635	8.75	0.49165	8.75017	0.5465	8.75033	-0.2408	8.75033	0.35485
8.7585	0.137	8.75867	0.4416	8.75833	0.5767	8.75867	0.8948	8.75833	0.49305	8.7585	0.54365	8.75867	-0.24285	8.75867	0.3562
8.76683	0.1356	8.767	0.439	8.76667	0.5795	8.767	0.89525	8.76667	0.4973	8.76683	0.541	8.767	-0.2467	8.767	0.35865
8.77517	0.1326	8.77533	0.4359	8.775	0.57755	8.77533	0.8942	8.775	0.50285	8.77517	0.54085	8.77533	-0.2502	8.77533	0.35715
8.7835	0.13255	8.78367	0.4351	8.78333	0.57595	8.78367	0.8957	8.78333	0.50995	8.7835	0.5471	8.78367	-0.25355	8.78367	0.3599
8.79183	0.1318	8.792	0.43355	8.79167	0.5715	8.792	0.89575	8.79167	0.51575	8.79183	0.5558	8.792	-0.2552	8.792	0.36025
8.80017	0.1302	8.80033	0.42985	8.8	0.5621	8.80033	0.8947	8.8	0.5211	8.80017	0.57425	8.80033	-0.2635	8.80033	0.3596
8.8085	0.1277	8.80867	0.42765	8.80833	0.5542	8.80867	0.89415	8.80833	0.5286	8.8085	0.6044	8.80867	-0.2671	8.80867	0.3582
8.81683	0.12605	8.817	0.426	8.81667	0.5456	8.817	0.89425	8.81667	0.5327	8.81683	0.6501	8.817	-0.27125	8.817	0.35725
8.82517	0.1259	8.82533	0.42495	8.825	0.5361	8.82533	0.8922	8.825	0.5385	8.82517	0.7122	8.82533	-0.27745	8.82533	0.3552
8.8335	0.12465	8.83367	0.42425	8.83333	0.52725	8.83367	0.88935	8.83333	0.54225	8.8335	0.79165	8.83367	-0.2828	8.83367	0.3545
8.84183	0.1226	8.842	0.42585	8.84167	0.5208	8.842	0.8855	8.84167	0.54475	8.84183	0.88275	8.842	-0.287	8.842	0.35515
8.85017	0.12145	8.85033	0.42825	8.85	0.51565	8.85033	0.8829	8.85	0.5456	8.85017	0.98195	8.85033	-0.28985	8.85033	0.362
8.8585	0.121	8.85867	0.43205	8.85833	0.5114	8.85867	0.8785	8.85833	0.54185	8.8585	1.08395	8.85867	-0.28995	8.85867	0.374
8.86683	0.12075	8.867	0.44035	8.86667	0.51355	8.867	0.8759	8.86667	0.53885	8.86683	1.1748	8.867	-0.29415	8.867	0.4004
8.87517	0.11905	8.87533	0.45195	8.875	0.51845	8.87533	0.8744	8.875	0.533	8.87517	1.2503	8.87533	-0.29495	8.87533	0.4413
8.8835	0.1189	8.88367	0.46635	8.88333	0.5285	8.88367	0.87945	8.88333	0.52735	8.8835	1.2995	8.88367	-0.2967	8.88367	0.50985
8.89183	0.11825	8.892	0.48535	8.89167	0.5417	8.892	0.8942	8.89167	0.5211	8.89183	1.32185	8.892	-0.3002	8.892	0.6067
8.90017	0.11425	8.90033	0.50415	8.9	0.55445	8.90033	0.92145	8.9	0.5131	8.90017	1.31055	8.90033	-0.3006	8.90033	0.74075
8.9085	0.1166	8.90867	0.52815	8.90833	0.5704	8.90867	0.9765	8.90833	0.5113	8.9085	1.27585	8.90867	-0.30175	8.90867	0.92015
8.91683	0.1153	8.917	0.54945	8.91667	0.58165	8.917	1.05935	8.91667	0.5089	8.91683	1.2178	8.917	-0.3029	8.917	1.1351
8.92517	0.11545	8.92533	0.5659	8.925	0.58925	8.92533	1.1831	8.925	0.513	8.92517	1.1441	8.92533	-0.3034	8.92533	1.38275
8.9335	0.1159	8.93367	0.58285	8.93333	0.5955	8.93367	1.36135	8.93333	0.5291	8.9335	1.06375	8.93367	-0.3043	8.93367	1.65075
8.94183	0.1181	8.942	0.5909	8.94167	0.59285	8.942	1.59745	8.94167	0.5525	8.94183	0.97945	8.942	-0.3042	8.942	1.9158
8.95017	0.1205	8.95033	0.59185	8.95	0.5872	8.95033	1.8897	8.95	0.5899	8.95017	0.89505	8.95033	-0.30575	8.95033	2.15725
8.9585	0.1245	8.95867	0.58845	8.95833	0.5729	8.95867	2.23405	8.95833	0.6433	8.9585	0.8172	8.95867	-0.30595	8.95867	2.3548
8.96683	0.12885	8.967	0.57805	8.96667	0.55655	8.967	2.6085	8.96667	0.712	8.96683	0.7464	8.967	-0.3069	8.967	2.48735
8.97517	0.1379	8.97533	0.5651	8.975	0.53975	8.97533	2.99385	8.975	0.79475	8.97517	0.68425	8.97533	-0.30935	8.97533	2.5495
8.9835	0.14625	8.98367	0.54685	8.98333	0.519	8.98367	3.35195	8.98333	0.8875	8.9835	0.63	8.98367	-0.3084	8.98367	2.5355
8.99183	0.15765	8.992	0.5278	8.99167	0.4998	8.992	3.65465	8.99167	0.98615	8.99183	0.58235	8.992	-0.3112	8.992	2.45395
9.00017	0.1693	9.00033	0.50675	9	0.48355	9.00033	3.87195	9	1.0789	9.00017	0.54395	9.00033	-0.31235	9.00033	2.3184
9.0085	0.18075	9.00867	0.48865	9.00833	0.466	9.00867	3.9876	9.00833	1.15845	9.0085	0.5091	9.00867	-0.3156	9.00867	2.14145
9.01683	0.1895	9.017	0.4693	9.01667	0.44855	9.017	3.99325	9.01667	1.2159	9.01683	0.48065	9.017	-0.3186	9.017	1.9389
9.02517	0.1966	9.02533	0.4527	9.025	0.43555	9.02533	3.90015	9.025	1.2492	9.02517	0.45545	9.02533	-0.32055	9.02533	1.7292
9.0335	0.2034	9.03367	0.4392	9.03333	0.4231	9.03367	3.7235	9.03333	1.25475	9.0335	0.43775	9.03367	-0.3207	9.03367	1.5246
9.04183	0.20525	9.042	0.4271	9.04167	0.4126	9.042	3.48425	9.04167	1.23205	9.04183	0.4228	9.042	-0.324	9.042	1.3309
9.05017	0.2031	9.05033	0.41445	9.05	0.40305	9.05033	3.2069	9.05	1.186	9.05017	0.40915	9.05033	-0.32435	9.05033	1.15315
9.0585	0.19945	9.05867	0.4058	9.05833	0.39655	9.05867	2.9164	9.05833	1.125	9.0585	0.4013	9.05867	-0.3278	9.05867	0.99735
9.06683	0.1916	9.067	0.3956	9.06667	0.3888	9.067	2.62375	9.06667	1.0494	9.06683	0.3925	9.067	-0.33035	9.067	0.85935
9.07517	0.18645	9.07533	0.38995	9.075	0.383	9.07533	2.34995	9.075	0.9713	9.07517	0.3892	9.07533	-0.332	9.07533	0.7448
9.0835	0.1777	9.08367	0.3851	9.08333	0.3794	9.08367	2.09815	9.08333	0.8926	9.0835	0.38565	9.08367	-0.33515	9.08367	0.64515
9.09183	0.16565	9.092	0.3803	9.09167	0.37465	9.092	1.8734	9.09167	0.8186	9.09183	0.38355	9.092	-0.33725	9.092	0.5595
9.10017	0.15755	9.10033	0.37455	9.1	0.3711	9.10033	1.6796	9.1	0.74965	9.10017	0.38335	9.10033	-0.33935	9.10033	0.4897
9.1085	0.1505	9.10867	0.3724	9.10833	0.3693	9.10867	1.51245	9.10833	0.68835	9.1085	0.38355	9.10867	-0.34365	9.10867	0.4309
9.11683	0.1422	9.117	0.36835	9.11667	0.365	9.117	1.36865	9.11667	0.63345	9.11683	0.38385	9.117	-0.34375	9.117	0.383
9.12517	0.13585	9.12533	0.36465	9.125	0.3645	9.12533	1.249	9.125	0.58645	9.12517	0.38605	9.12533	-0.34675	9.12533	0.34505
9.1335	0.13085	9.13367	0.3613	9.13333	0.3612	9.13367	1.14675	9.13333	0.5446	9.1335	0.3848	9.13367	-0.348	9.13367	0.31365
9.14183	0.1263	9.142	0.35915	9.14167	0.36	9.142	1.06585	9.14167	0.50895	9.14183	0.3877	9.142	-0.3511	9.142	0.2923
9.15017	0.12165	9.15033	0.3575	9.15	0.3585	9.15033	0.99675	9.15	0.4791	9.15017	0.3857	9.15033	-0.35495	9.15033	0.27395
9.1585	0.119	9.15867	0.3549	9.15833	0.3568	9.15867	0.9419	9.15833	0.45325	9.1585	0.38795	9.15867	-0.3549	9.15867	0.2615
9.16683	0.1181	9.167	0.35485	9.16667	0.35385	9.167	0.8991	9.16667	0.4331	9.16683	0.38695	9.167	-0.35465	9.167	0.2549
9.17517	0.11455	9.17533	0.3534	9.175	0.3532	9.17533	0.8641	9.175	0.4143	9.17517	0.386	9.17533	-0.358	9.17533	0.2494
9.1835	0.11305	9.18367	0.3504	9.18333	0.3531	9.18367	0.8384	9.18333	0.39875	9.1835	0.38585	9.18367	-0.35565	9.18367	0.2467
9.19183	0.1109	9.192	0.34975	9.19167	0.352	9.192	0.82095	9.19167	0.38775	9.19183	0.384	9.192	-0.359	9.192	0.2464
9.20017	0.1094	9.20033	0.34685	9.2	0.34955	9.20033	0.8083	9.2	0.37605	9.20017	0.38075	9.20033	-0.35955	9.20033	0.244
9.2085	0.1078	9.20867	0.34545	9.20833	0.3483	9.20867	0.802	9.20833	0.36835	9.2085	0.37825	9.20867	-0.364	9.20867	0.24585
9.21683	0.1084	9.217	0.34445	9.21667	0.3492	9.217	0.8033	9.21667	0.36555	9.21683	0.3781	9.217	-0.36395	9.217	0.24555
9.22517	0.1075	9.22533	0.3424	9.225	0.34705	9.22533	0.8077	9.225	0.36185	9.22517	0.37505	9.22533	-0.3619	9.22533	0.24675
9.2335	0.109	9.23367	0.3428	9.23333	0.34615	9.23367	0.8168	9.23333	0.3593	9.2335	0.374	9.23367	-0.3623	9.23367	0.24855
9.24183	0.1098	9.242	0.34285	9.24167	0.34575	9.242	0.82725	9.24167	0.35905	9.24183	0.37275	9.242	-0.3616	9.242	0.25
9.25017	0.1086	9.25033	0.34015	9.25	0.34445	9.25033	0.83395	9.25	0.35735	9.25017	0.37005	9.25033	-0.36195	9.25033	0.2479
9.2585	0.10805	9.25867	0.3372	9.25833	0.3427	9.25867	0.8424	9.25833	0.3557	9.2585	0.36905	9.25867	-0.36375	9.25867	0.2476
9.26683	0.10835	9.267	0.3381	9.26667	0.3413	9.267	0.85105	9.26667	0.35635	9.26683	0.36765	9.267	-0.36115	9.267	0.24615
9.27517	0.10785	9.27533	0.3363	9.275	0.3421	9.27533	0.85325	9.275	0.3548	9.27517	0.36665	9.27533	-0.35945	9.27533	0.24505
9.2835	0.106	9.28367	0.33275	9.28333	0.3382	9.28367	0.8526	9.28333	0.35205	9.2835	0.36375	9.28367	-0.359	9.28367	0.2405
9.29183	0.10615	9.292	0.3327	9.29167	0.33645	9.292	0.85025	9.29167	0.35155	9.29183	0.36265	9.292	-0.35795	9.292	0.23935
9.30017	0.105	9.30033	0.3304	9.3	0.3362	9.30033	0.84405	9.3	0.3498	9.30017	0.36055	9.30033	-0.35825	9.30033	0.23715
9.3085	0.10575	9.30867	0.33125	9.30833	0.33595	9.30867	0.8362	9.30833	0.349	9.3085	0.36135	9.30867	-0.357	9.30867	0.2357
9.31683	0.1053	9.317	0.3277	9.31667	0.33475	9.317	0.8262	9.31667	0.3469	9.31683	0.3595	9.317	-0.3548	9.317	0.2315
9.32517	0.1064	9.32533	0.3269	9.325	0.3346	9.32533	0.81725	9.325	0.3461	9.32517	0.3585	9.32533	-0.3552	9.32533	0.2308
9.3335	0.10445	9.33367	0.3234	9.33333	0.33155	9.33367	0.80505	9.33333	0.3425	9.3335	0.358	9.33367	-0.35595	9.33367	0.22805
9.34183	0.1048	9.342	0.32435	9.34167	0.33075	9.342	0.79855	9.34167	0.3408	9.34183	0.358	9.342	-0.35765	9.342	0.22695
9.35017	0.1036	9.35033	0.3221	9.35	0.328	9.35033	0.78985	9.35	0.33895	9.35017	0.35685	9.35033	-0.3615	9.35033	0.22445
9.3585	0.10455	9.35867	0.3217	9.35833	0.3284	9.35867	0.78345	9.35833	0.33525	9.3585	0.35705	9.35867	-0.35855	9.35867	0.2228
9.36683	0.1025	9.367	0.3191	9.36667	0.3263	9.367	0.7761	9.36667	0.33325	9.36683	0.35715	9.367	-0.3617	9.367	0.21995
9.37517	0.10335	9.37533	0.319	9.375	0.32755	9.37533	0.77155	9.375	0.33175	9.37517	0.35645	9.37533	-0.36295	9.37533	0.21855
9.3835	0.10465	9.38367	0.31745	9.38333	0.32885	9.38367	0.76675	9.38333	0.32885	9.3835	0.3571	9.38367	-0.36465	9.38367	0.2183
9.39183	0.10135	9.392	0.31385	9.39167	0.32675	9.392	0.7582	9.39167	0.323	9.39183	0.355	9.392	-0.3645	9.392	0.2157
9.40017	0.10305	9.40033	0.3143	9.4	0.3272	9.40033	0.7524	9.4	0.3235	9.40017	0.35595	9.40033	-0.36915	9.40033	0.21435
9.4085	0.10265	9.40867	0.31385	9.40833	0.32705	9.40867	0.74605	9.40833	0.3215	9.4085	0.3587	9.40867	-0.37145	9.40867	0.21335
9.41683	0.1018	9.417	0.3117	9.41667	0.3272	9.417	0.73665	9.41667	0.31975	9.41683	0.3573	9.417	-0.36995	9.417	0.2134
9.42517	0.1015	9.42533	0.31095	9.425	0.32725	9.42533	0.72905	9.425	0.31565	9.42517	0.35785	9.42533	-0.37155	9.42533	0.2145
9.4335	0.1016	9.43367	0.3095	9.43333	0.32835	9.43367	0.7189	9.43333	0.31515	9.4335	0.35925	9.43367	-0.3719	9.43367	0.21725
9.44183	0.10345	9.442	0.30945	9.44167	0.32985	9.442	0.7117	9.44167	0.31395	9.44183	0.3599	9.442	-0.37225	9.442	0.22155
9.45017	0.1029	9.45033	0.3086	9.45	0.33045	9.45033	0.70465	9.45	0.312	9.45017	0.3599	9.45033	-0.37045	9.45033	0.22655
9.4585	0.10085	9.45867	0.3066	9.45833	0.32975	9.45867	0.69745	9.45833	0.3102	9.4585	0.35925	9.45867	-0.3664	9.45867	0.23045
9.46683	0.1014	9.467	0.3065	9.46667	0.33	9.467	0.6929	9.46667	0.3094	9.46683	0.35935	9.467	-0.36455	9.467	0.2369
9.47517	0.1012	9.47533	0.30245	9.475	0.3298	9.47533	0.6892	9.475	0.3071	9.47517	0.3582	9.47533	-0.3599	9.47533	0.2445
9.4835	0.1022	9.48367	0.3014	9.48333	0.3322	9.48367	0.6878	9.48333	0.30615	9.4835	0.36005	9.48367	-0.35445	9.48367	0.2539
9.49183	0.1004	9.492	0.3014	9.49167	0.33195	9.492	0.6867	9.49167	0.3049	9.49183	0.35925	9.492	-0.35185	9.492	0.2608
9.50017	0.10235	9.50033	0.30075	9.5	0.3314	9.50033	0.6867	9.5	0.3056	9.50017	0.3591	9.50033	-0.34925	9.50033	0.26685
9.5085	0.1023	9.50867	0.29815	9.50833	0.3314	9.50867	0.6885	9.50833	0.30485	9.5085	0.35845	9.50867	-0.3437	9.50867	0.2717
9.51683	0.1022	9.517	0.29735	9.51667	0.33285	9.517	0.6906	9.51667	0.306	9.51683	0.35815	9.517	-0.3422	9.517	0.2745
9.52517	0.1001	9.52533	0.2941	9.525	0.3312	9.52533	0.6905	9.525	0.30505	9.52517	0.3546	9.52533	-0.3394	9.52533	0.2725
9.5335	0.1014	9.53367	0.29425	9.53333	0.3331	9.53367	0.6932	9.53333	0.3076	9.5335	0.3554	9.53367	-0.34145	9.53367	0.27235
9.54183	0.1023	9.542	0.2942	9.54167	0.3328	9.542	0.69205	9.54167	0.3081	9.54183	0.3534	9.542	-0.3386	9.542	0.26955
9.55017	0.1024	9.55033	0.2933	9.55	0.33205	9.55033	0.69105	9.55	0.30915	9.55017	0.35315	9.55033	-0.3404	9.55033	0.2632
9.5585	0.1016	9.55867	0.291	9.55833	0.3316	9.55867	0.68645	9.55833	0.3096	9.5585	0.3513	9.55867	-0.34475	9.55867	0.25635
9.56683	0.1024	9.567	0.29055	9.56667	0.3313	9.567	0.68195	9.56667	0.3109	9.56683	0.3484	9.567	-0.3471	9.567	0.24875
9.57517	0.10255	9.57533	0.2896	9.575	0.3297	9.57533	0.67815	9.575	0.309	9.57517	0.34665	9.57533	-0.35015	9.57533	0.2404
9.5835	0.10235	9.58367	0.28925	9.58333	0.32855	9.58367	0.67185	9.58333	0.30995	9.5835	0.34565	9.58367	-0.3518	9.58367	0.2324
9.59183	0.10095	9.592	0.2869	9.59167	0.3271	9.592	0.6646	9.59167	0.30935	9.59183	0.34345	9.592	-0.35445	9.592	0.2248
9.60017	0.1026	9.60033	0.28825	9.6	0.32655	9.60033	0.6587	9.6	0.3082	9.60017	0.34225	9.60033	-0.35875	9.60033	0.21815
9.6085	0.1013	9.60867	0.2877	9.60833	0.3252	9.60867	0.65285	9.60833	0.3078	9.6085	0.3406	9.60867	-0.36035	9.60867	0.21065
9.61683	0.10185	9.617	0.28695	9.61667	0.32225	9.617	0.6472	9.61667	0.30625	9.61683	0.33945	9.617	-0.36285	9.617	0.2053
9.62517	0.10085	9.62533	0.28665	9.625	0.32115	9.62533	0.6413	9.625	0.3062	9.62517	0.33615	9.62533	-0.3666	9.62533	0.20095
9.6335	0.10015	9.63367	0.2839	9.63333	0.31865	9.63367	0.6345	9.63333	0.30215	9.6335	0.3333	9.63367	-0.36745	9.63367	0.1943
9.64183	0.1009	9.642	0.2839	9.64167	0.3185	9.642	0.63045	9.64167	0.30125	9.64183	0.3331	9.642	-0.36545	9.642	0.1922
9.65017	0.09965	9.65033	0.2844	9.65	0.3167	9.65033	0.62535	9.65	0.30075	9.65017	0.3329	9.65033	-0.36105	9.65033	0.1886
9.6585	0.10075	9.65867	0.283	9.65833	0.31485	9.65867	0.62125	9.65833	0.299	9.6585	0.3327	9.65867	-0.3497	9.65867	0.1854
9.66683	0.1005	9.667	0.28175	9.66667	0.31285	9.667	0.61615	9.66667	0.29705	9.66683	0.33005	9.667	-0.32625	9.667	0.18195
9.67517	0.10125	9.67533	0.2816	9.675	0.3127	9.67533	0.61275	9.675	0.296	9.67517	0.3295	9.67533	-0.2917	9.67533	0.17935
9.6835	0.1019	9.68367	0.28075	9.68333	0.31045	9.68367	0.6064	9.68333	0.29335	9.6835	0.3293	9.68367	-0.2568	9.68367	0.17795
9.69183	0.10075	9.692	0.27885	9.69167	0.308	9.692	0.602	9.69167	0.2913	9.69183	0.3294	9.692	-0.2221	9.692	0.1748
9.70017	0.10015	9.70033	0.2771	9.7	0.3073	9.70033	0.5956	9.7	0.2881	9.70017	0.32805	9.70033	-0.20135	9.70033	0.17265
9.7085	0.1012	9.70867	0.2781	9.70833	0.306	9.70867	0.59365	9.70833	0.28855	9.7085	0.3296	9.70867	-0.2023	9.70867	0.1713
9.71683	0.1008	9.717	0.2754	9.71667	0.3045	9.717	0.58685	9.71667	0.28365	9.71683	0.32715	9.717	-0.22175	9.717	0.16805
9.72517	0.10185	9.72533	0.2753	9.725	0.30445	9.72533	0.5843	9.725	0.28335	9.72517	0.3284	9.72533	-0.23955	9.72533	0.16795
9.7335	0.1021	9.73367	0.27635	9.73333	0.3062	9.73367	0.58205	9.73333	0.28275	9.7335	0.32975	9.73367	-0.26015	9.73367	0.1671
9.74183	0.103	9.742	0.27485	9.74167	0.30445	9.742	0.57715	9.74167	0.2811	9.74183	0.32905	9.742	-0.2805	9.742	0.1639
9.75017	0.10245	9.75033	0.2735	9.75	0.30315	9.75033	0.57405	9.75	0.28005	9.75017	0.32945	9.75033	-0.33355	9.75033	0.16445
9.7585	0.10195	9.75867	0.2735	9.75833	0.3033	9.75867	0.5715	9.75833	0.2778	9.7585	0.3304	9.75867	-0.26895	9.75867	0.16365
9.76683	0.1041	9.767	0.273	9.76667	0.3042	9.767	0.5703	9.76667	0.27665	9.76683	0.3302	9.767	0.3213	9.767	0.1655
9.77517	0.1028	9.77533	0.27055	9.775	0.30405	9.77533	0.56785	9.775	0.2754	9.77517	0.32975	9.77533	1.38275	9.77533	0.16215
9.7835	0.1017	9.78367	0.2703	9.78333	0.30365	9.78367	0.56395	9.78333	0.2724	9.7835	0.3284	9.78367	2.4628	9.78367	0.1614
9.79183	0.10345	9.792	0.26995	9.79167	0.3026	9.792	0.5656	9.79167	0.27115	9.79183	0.3293	9.792	3.34395	9.792	0.1616
9.80017	0.10265	9.80033	0.2688	9.8	0.30395	9.80033	0.56475	9.8	0.2695	9.80017	0.33	9.80033	4.018	9.80033	0.1624
9.8085	0.10285	9.80867	0.269	9.80833	0.3036	9.80867	0.5666	9.80833	0.2691	9.8085	0.3307	9.80867	4.533	9.80867	0.16375
9.81683	0.10055	9.817	0.2668	9.81667	0.30415	9.817	0.5667	9.81667	0.26585	9.81683	0.3292	9.817	4.92665	9.817	0.16315
9.82517	0.10285	9.82533	0.26805	9.825	0.30615	9.82533	0.5732	9.825	0.2658	9.82517	0.33125	9.82533	5.23775	9.82533	0.16645
9.8335	0.101	9.83367	0.26545	9.83333	0.3051	9.83367	0.57655	9.83333	0.2636	9.8335	0.33025	9.83367	5.50435	9.83367	0.16855
9.84183	0.10095	9.842	0.2658	9.84167	0.3054	9.842	0.58395	9.84167	0.2634	9.84183	0.33305	9.842	5.7589	9.842	0.1694
9.85017	0.10015	9.85033	0.26335	9.85	0.3041	9.85033	0.5905	9.85	0.26165	9.85017	0.33245	9.85033	5.99915	9.85033	0.17
9.8585	0.10175	9.85867	0.26405	9.85833	0.30525	9.85867	0.60055	9.85833	0.2621	9.8585	0.33575	9.85867	6.20505	9.85867	0.17285
9.86683	0.1009	9.867	0.26435	9.86667	0.30615	9.867	0.6076	9.86667	0.26105	9.86683	0.33685	9.867	6.36315	9.867	0.17385
9.87517	0.101	9.87533	0.2628	9.875	0.3075	9.87533	0.61335	9.875	0.2596	9.87517	0.3404	9.87533	6.47435	9.87533	0.17475
9.8835	0.10275	9.88367	0.26265	9.88333	0.30875	9.88367	0.61955	9.88333	0.26085	9.8835	0.34505	9.88367	6.558	9.88367	0.17535
9.89183	0.10145	9.892	0.2606	9.89167	0.3088	9.892	0.6218	9.89167	0.2597	9.89183	0.3464	9.892	6.61985	9.892	0.17505
9.90017	0.10075	9.90033	0.25935	9.9	0.30645	9.90033	0.62035	9.9	0.25765	9.90017	0.34825	9.90033	6.6661	9.90033	0.17255
9.9085	0.1019	9.90867	0.25945	9.90833	0.3085	9.90867	0.6217	9.90833	0.2584	9.9085	0.3552	9.90867	6.7007	9.90867	0.17405
9.91683	0.103	9.917	0.259	9.91667	0.30935	9.917	0.61775	9.91667	0.25775	9.91683	0.3582	9.917	6.73035	9.917	0.1711
9.92517	0.10435	9.92533	0.25995	9.925	0.3085	9.92533	0.6125	9.925	0.25845	9.92517	0.36265	9.92533	6.7546	9.92533	0.17085
9.9335	0.10255	9.93367	0.2595	9.93333	0.30695	9.93367	0.60775	9.93333	0.2588	9.9335	0.36545	9.93367	6.77565	9.93367	0.1694
9.94183	0.10375	9.942	0.2581	9.94167	0.30575	9.942	0.5999	9.94167	0.25875	9.94183	0.3673	9.942	6.7899	9.942	0.16965
9.95017	0.10675	9.95033	0.2575	9.95	0.30545	9.95033	0.59395	9.95	0.2574	9.95017	0.37045	9.95033	6.8046	9.95033	0.1714
9.9585	0.105	9.95867	0.25695	9.95833	0.30455	9.95867	0.58615	9.95833	0.2561	9.9585	0.36895	9.95867	6.81765	9.95867	0.17185
9.96683	0.10615	9.967	0.2567	9.96667	0.30195	9.967	0.5825	9.96667	0.25575	9.96683	0.36885	9.967	6.8249	9.967	0.17485
9.97517	0.10825	9.97533	0.25625	9.975	0.301	9.97533	0.57925	9.975	0.2561	9.97517	0.3706	9.97533	6.83245	9.97533	0.18135
9.9835	0.10875	9.98367	0.25625	9.98333	0.30115	9.98367	0.5788	9.98333	0.25655	9.9835	0.3699	9.98367	6.83685	9.98367	0.19015
9.99183	0.10745	9.992	0.2556	9.99167	0.29825	9.992	0.5804	9.99167	0.25575	9.99183	0.3671	9.992	6.8417	9.992	0.20035
10.0002	0.10805	10.0003	0.25475	10	0.29655	10.0003	0.5855	10	0.2552	10.0002	0.36615	10.0003	6.84535	10.0003	0.21465
10.0085	0.10815	10.0087	0.25565	10.0083	0.29535	10.0087	0.5941	10.0083	0.2575	10.0085	0.36415	10.0087	6.84425	10.0087	0.23315
10.0168	0.10815	10.017	0.2553	10.0167	0.2944	10.017	0.60725	10.0167	0.25625	10.0168	0.36265	10.017	6.84475	10.017	0.2538
10.0252	0.1066	10.0253	0.2543	10.025	0.2948	10.0253	0.6257	10.025	0.2555	10.0252	0.3615	10.0253	6.846	10.0253	0.2758
10.0335	0.1068	10.0337	0.2549	10.0333	0.2951	10.0337	0.6472	10.0333	0.25595	10.0335	0.3593	10.0337	6.84295	10.0337	0.29785
10.0418	0.1073	10.042	0.2553	10.0417	0.296	10.042	0.6726	10.0417	0.25725	10.0418	0.35935	10.042	6.8401	10.042	0.32145
10.0502	0.10645	10.0503	0.2557	10.05	0.29665	10.0503	0.69775	10.05	0.25825	10.0502	0.35855	10.0503	6.8365	10.0503	0.34195
10.0585	0.10715	10.0587	0.2567	10.0583	0.29835	10.0587	0.72165	10.0583	0.25775	10.0585	0.35685	10.0587	6.8319	10.0587	0.3584
10.0668	0.10575	10.067	0.25585	10.0667	0.2987	10.067	0.7431	10.0667	0.25565	10.0668	0.35505	10.067	6.82535	10.067	0.3701
10.0752	0.1066	10.0753	0.25675	10.075	0.30185	10.0753	0.7628	10.075	0.25575	10.0752	0.35405	10.0753	6.8193	10.0753	0.37575
10.0835	0.1053	10.0837	0.25825	10.0833	0.30185	10.0837	0.77305	10.0833	0.25515	10.0835	0.35145	10.0837	6.81255	10.0837	0.37545
10.0918	0.1034	10.092	0.25735	10.0917	0.3005	10.092	0.77665	10.0917	0.2527	10.0918	0.349	10.092	6.80385	10.092	0.36755
10.1002	0.10565	10.1003	0.25825	10.1	0.30145	10.1003	0.77825	10.1	0.25305	10.1002	0.34765	10.1003	6.7968	10.1003	0.35815
10.1085	0.10575	10.1087	0.25845	10.1083	0.3025	10.1087	0.7702	10.1083	0.25245	10.1085	0.3463	10.1087	6.7892	10.1087	0.344
10.1168	0.10575	10.117	0.2572	10.1167	0.30065	10.117	0.7555	10.1167	0.25025	10.1168	0.3436	10.117	6.78155	10.117	0.32485
10.1252	0.10665	10.1253	0.25835	10.125	0.3008	10.1253	0.738	10.125	0.2507	10.1252	0.3414	10.1253	6.77335	10.1253	0.3071
10.1335	0.10895	10.1337	0.2596	10.1333	0.30145	10.1337	0.71845	10.1333	0.25035	10.1335	0.33695	10.1337	6.76685	10.1337	0.2878
10.1418	0.1085	10.142	0.25835	10.1417	0.29785	10.142	0.6943	10.1417	0.24935	10.1418	0.3353	10.142	6.75925	10.142	0.26835
10.1502	0.1068	10.1503	0.2589	10.15	0.2983	10.1503	0.67165	10.15	0.24755	10.1502	0.33095	10.1503	6.749	10.1503	0.25165
10.1585	0.10875	10.1587	0.2582	10.1583	0.29685	10.1587	0.64925	10.1583	0.2497	10.1585	0.32965	10.1587	6.74025	10.1587	0.2365
10.1668	0.11125	10.167	0.25885	10.1667	0.2961	10.167	0.62855	10.1667	0.25135	10.1668	0.32775	10.167	6.73025	10.167	0.22405
10.1752	0.10995	10.1753	0.25775	10.175	0.2934	10.1753	0.6088	10.175	0.25005	10.1752	0.3274	10.1753	6.7206	10.1753	0.2091
10.1835	0.11005	10.1837	0.25695	10.1833	0.29175	10.1837	0.5899	10.1833	0.2501	10.1835	0.32615	10.1837	6.70915	10.1837	0.1979
10.1918	0.11135	10.192	0.25475	10.1917	0.29025	10.192	0.5746	10.1917	0.25145	10.1918	0.32625	10.192	6.69845	10.192	0.19085
10.2002	0.11275	10.2003	0.25695	10.2	0.28905	10.2003	0.56385	10.2	0.2514	10.2002	0.3267	10.2003	6.6892	10.2003	0.1841
10.2085	0.11175	10.2087	0.2545	10.2083	0.2865	10.2087	0.55185	10.2083	0.25065	10.2085	0.32935	10.2087	6.6767	10.2087	0.1786
10.2168	0.11105	10.217	0.25445	10.2167	0.2858	10.217	0.5426	10.2167	0.24995	10.2168	0.33405	10.217	6.66665	10.217	0.17355
10.2252	0.10915	10.2253	0.2528	10.225	0.282	10.2253	0.53365	10.225	0.24745	10.2252	0.3388	10.2253	6.67075	10.2253	0.1687
10.2335	0.1096	10.2337	0.2523	10.2333	0.28235	10.2337	0.52835	10.2333	0.24635	10.2335	0.3487	10.2337	6.6752	10.2337	0.16615
10.2418	0.1089	10.242	0.2507	10.2417	0.28245	10.242	0.5218	10.2417	0.2448	10.2418	0.3629	10.242	6.66675	10.242	0.16385
10.2502	0.10875	10.2503	0.2494	10.25	0.28235	10.2503	0.51525	10.25	0.24375	10.2502	0.38765	10.2503	6.6336	10.2503	0.16025
10.2585	0.10895	10.2587	0.2496	10.2583	0.2841	10.2587	0.51245	10.2583	0.2422	10.2585	0.42645	10.2587	6.6148	10.2587	0.1591
10.2668	0.10775	10.267	0.24655	10.2667	0.28735	10.267	0.5079	10.2667	0.2393	10.2668	0.48655	10.267	6.60855	10.267	0.1568
10.2752	0.10685	10.2753	0.24435	10.275	0.28975	10.2753	0.5022	10.275	0.23605	10.2752	0.5512	10.2753	6.5827	10.2753	0.15365
10.2835	0.10535	10.2837	0.24405	10.2833	0.2951	10.2837	0.5	10.2833	0.23465	10.2835	0.5837	10.2837	6.5651	10.2837	0.15285
10.2918	0.1067	10.292	0.2439	10.2917	0.3046	10.292	0.4978	10.2917	0.2334	10.2918	0.58465	10.292	6.54735	10.292	0.1517
10.3002	0.10465	10.3003	0.24145	10.3	0.315	10.3003	0.49435	10.3	0.2312	10.3002	0.5715	10.3003	6.535	10.3003	0.1481
10.3085	0.10455	10.3087	0.23975	10.3083	0.32915	10.3087	0.4912	10.3083	0.2286	10.3085	0.552	10.3087	6.52065	10.3087	0.14655
10.3168	0.10445	10.317	0.2371	10.3167	0.3534	10.317	0.48885	10.3167	0.22575	10.3168	0.5351	10.317	6.5065	10.317	0.14585
10.3252	0.1041	10.3253	0.2372	10.325	0.3935	10.3253	0.48785	10.325	0.2231	10.3252	0.52025	10.3253	6.4908	10.3253	0.14515
10.3335	0.10345	10.3337	0.23455	10.3333	0.45445	10.3337	0.486	10.3333	0.2199	10.3335	0.49685	10.3337	6.4745	10.3337	0.1456
10.3418	0.1035	10.342	0.23475	10.3417	0.52265	10.342	0.48755	10.3417	0.22055	10.3418	0.4594	10.342	6.4583	10.342	0.1453
10.3502	0.10255	10.3503	0.23375	10.35	0.55495	10.3503	0.48765	10.35	0.2183	10.3502	0.40325	10.3503	6.4407	10.3503	0.1438
10.3585	0.103	10.3587	0.23265	10.3583	0.55635	10.3587	0.489	10.3583	0.2178	10.3585	0.3584	10.3587	6.4239	10.3587	0.14405
10.3668	0.10335	10.367	0.232	10.3667	0.54045	10.367	0.492	10.3667	0.2175	10.3668	0.60965	10.367	6.4086	10.367	0.1442
10.3752	0.10285	10.3753	0.2309	10.375	0.5174	10.3753	0.4947	10.375	0.21775	10.3752	1.222	10.3753	6.3907	10.3753	0.1447
10.3835	0.1051	10.3837	0.23065	10.3833	0.49985	10.3837	0.50465	10.3833	0.218	10.3835	1.8804	10.3837	6.37105	10.3837	0.14695
10.3918	0.1064	10.392	0.22945	10.3917	0.4845	10.392	0.5222	10.3917	0.21815	10.3918	2.42045	10.392	6.3553	10.392	0.149
10.4002	0.1068	10.4003	0.22925	10.4	0.4617	10.4003	0.55845	10.4	0.22085	10.4002	2.83095	10.4003	6.33365	10.4003	0.1526
10.4085	0.11045	10.4087	0.22815	10.4083	0.42125	10.4087	0.62065	10.4083	0.2221	10.4085	3.1333	10.4087	6.31465	10.4087	0.15585
10.4168	0.11775	10.417	0.22605	10.4167	0.37665	10.417	0.71155	10.4167	0.22495	10.4168	3.376	10.417	6.29485	10.417	0.15895
10.4252	0.13315	10.4253	0.22625	10.425	0.3233	10.4253	0.77275	10.425	0.2289	10.4252	3.6008	10.4253	6.27695	10.4253	0.16515
10.4335	0.14785	10.4337	0.226	10.4333	0.44505	10.4337	0.78775	10.4333	0.23645	10.4335	3.8046	10.4337	6.25585	10.4337	0.1745
10.4418	0.1535	10.442	0.2263	10.4417	0.96645	10.442	0.7804	10.4417	0.246	10.4418	3.9643	10.442	6.235	10.442	0.185
10.4502	0.1514	10.4503	0.2248	10.45	1.6375	10.4503	0.7611	10.45	0.25605	10.4502	4.07245	10.4503	6.216	10.4503	0.199
10.4585	0.1425	10.4587	0.22615	10.4583	2.2183	10.4587	0.7463	10.4583	0.2794	10.4585	4.14565	10.4587	6.1961	10.4587	0.2235
10.4668	0.1313	10.467	0.22455	10.4667	2.6596	10.467	0.739	10.4667	0.31335	10.4668	4.19265	10.467	6.1723	10.467	0.2614
10.4752	0.1234	10.4753	0.2262	10.475	2.9867	10.4753	0.7336	10.475	0.36305	10.4752	4.22785	10.4753	6.1529	10.4753	0.32845
10.4835	0.11725	10.4837	0.2268	10.4833	3.238	10.4837	0.7078	10.4833	0.40325	10.4835	4.25355	10.4837	6.13235	10.4837	0.41105
10.4918	0.1093	10.492	0.2264	10.4917	3.4611	10.492	0.67435	10.4917	0.41755	10.4918	4.2724	10.492	6.1096	10.492	0.45735
10.5002	0.0961	10.5003	0.2255	10.5	3.6694	10.5003	0.6414	10.5	0.4085	10.5002	4.28425	10.5003	6.0892	10.5003	0.4608
10.5085	0.0784	10.5087	0.2263	10.5083	3.83945	10.5087	0.6902	10.5083	0.3924	10.5085	4.2944	10.5087	6.06525	10.5087	0.4409
10.5168	0.0376	10.517	0.228	10.5167	3.95765	10.517	1.12505	10.5167	0.37555	10.5168	4.30355	10.517	6.0475	10.517	0.4144
10.5252	0.1169	10.5253	0.2297	10.525	4.0355	10.5253	1.8575	10.525	0.36185	10.5252	4.3083	10.5253	6.02545	10.5253	0.3929
10.5335	0.58675	10.5337	0.2322	10.5333	4.0862	10.5337	2.53615	10.5333	0.3495	10.5335	4.31155	10.5337	6.0012	10.5337	0.37615
10.5418	1.24155	10.542	0.2372	10.5417	4.122	10.542	3.05345	10.5417	0.3269	10.5418	4.3141	10.542	5.9775	10.542	0.34975
10.5502	1.8322	10.5503	0.2466	10.55	4.14745	10.5503	3.42855	10.55	0.297	10.5502	4.3132	10.5503	5.9534	10.5503	0.30555
10.5585	2.298	10.5587	0.25805	10.5583	4.1672	10.5587	3.69925	10.5583	0.26395	10.5585	4.31285	10.5587	5.932	10.5587	0.256
10.5668	2.64885	10.567	0.2651	10.5667	4.18	10.567	3.91405	10.5667	0.2303	10.5668	4.31055	10.567	5.90685	10.567	0.2161
10.5752	2.91605	10.5753	0.26025	10.575	4.19	10.5753	4.1088	10.575	0.1953	10.5752	4.30745	10.5753	5.88335	10.5753	0.1777
10.5835	3.14315	10.5837	0.25105	10.5833	4.1971	10.5837	4.27515	10.5833	0.35615	10.5835	4.30375	10.5837	5.8606	10.5837	0.14465
10.5918	3.36335	10.592	0.2383	10.5917	4.20215	10.592	4.39775	10.5917	0.89155	10.5918	4.30035	10.592	5.8363	10.592	0.34065
10.6002	3.55965	10.6003	0.2302	10.6	4.2052	10.6003	4.4777	10.6	1.5414	10.6002	4.29755	10.6003	5.81145	10.6003	0.90865
10.6085	3.70725	10.6087	0.2211	10.6083	4.20635	10.6087	4.52745	10.6083	2.0962	10.6085	4.2957	10.6087	5.7899	10.6087	1.56205
10.6168	3.8077	10.617	0.21035	10.6167	4.20525	10.617	4.55685	10.6167	2.5237	10.6168	4.29225	10.617	5.766	10.617	2.1088
10.6252	3.87545	10.6253	0.19965	10.625	4.2027	10.6253	4.57745	10.625	2.8404	10.6252	4.2897	10.6253	5.74175	10.6253	2.51795
10.6335	3.92275	10.6337	0.1896	10.6333	4.20195	10.6337	4.5939	10.6333	3.0874	10.6335	4.28855	10.6337	5.716	10.6337	2.822
10.6418	3.9578	10.642	0.1825	10.6417	4.19865	10.642	4.6057	10.6417	3.30625	10.6418	4.286	10.642	5.69495	10.642	3.0676
10.6502	3.98115	10.6503	0.1766	10.65	4.19345	10.6503	4.6124	10.65	3.51215	10.6502	4.28495	10.6503	5.6688	10.6503	3.29265
10.6585	3.9999	10.6587	0.1734	10.6583	4.18995	10.6587	4.61705	10.6583	3.6838	10.6585	4.2807	10.6587	5.6415	10.6587	3.49125
10.6668	4.01525	10.667	0.17085	10.6667	4.18565	10.667	4.61985	10.6667	3.80515	10.6668	4.2779	10.667	5.61775	10.667	3.63845
10.6752	4.02515	10.6753	0.15965	10.675	4.18275	10.6753	4.61945	10.675	3.8848	10.6752	4.2748	10.6753	5.5898	10.6753	3.7373
10.6835	4.0335	10.6837	0.1686	10.6833	4.179	10.6837	4.61995	10.6833	3.94005	10.6835	4.272	10.6837	5.5643	10.6837	3.80345
10.6918	4.03875	10.692	0.35085	10.6917	4.17455	10.692	4.61615	10.6917	3.97575	10.6918	4.2646	10.692	5.5368	10.692	3.84485
10.7002	4.04515	10.7003	0.8453	10.7	4.17515	10.7003	4.6162	10.7	4.00125	10.7002	4.26065	10.7003	5.5095	10.7003	3.87775
10.7085	4.04585	10.7087	1.4539	10.7083	4.1709	10.7087	4.6104	10.7083	4.0208	10.7085	4.2519	10.7087	5.4816	10.7087	3.89955
10.7168	4.0464	10.717	1.97495	10.7167	4.1678	10.717	4.60555	10.7167	4.034	10.7168	4.24655	10.717	5.45385	10.717	3.9132
10.7252	4.0448	10.7253	2.3605	10.725	4.1625	10.7253	4.6007	10.725	4.04405	10.7252	4.2376	10.7253	5.42235	10.7253	3.92325
10.7335	4.045	10.7337	2.64955	10.7333	4.16275	10.7337	4.59575	10.7333	4.0501	10.7335	4.2294	10.7337	5.3917	10.7337	3.93355
10.7418	4.0421	10.742	2.8975	10.7417	4.1588	10.742	4.59095	10.7417	4.05405	10.7418	4.21905	10.742	5.3585	10.742	3.9379
10.7502	4.039	10.7503	3.11385	10.75	4.154	10.7503	4.5846	10.75	4.0553	10.7502	4.21205	10.7503	5.3242	10.7503	3.93935
10.7585	4.03695	10.7587	3.28275	10.7583	4.1478	10.7587	4.5791	10.7583	4.05525	10.7585	4.2005	10.7587	5.2894	10.7587	3.93935
10.7668	4.03315	10.767	3.3989	10.7667	4.1415	10.767	4.57495	10.7667	4.0542	10.7668	4.1906	10.767	5.2506	10.767	3.936
10.7752	4.03145	10.7753	3.47595	10.775	4.13525	10.7753	4.57085	10.775	4.05025	10.7752	4.1808	10.7753	5.2148	10.7753	3.93335
10.7835	4.0297	10.7837	3.5273	10.7833	4.12675	10.7837	4.56855	10.7833	4.0479	10.7835	4.1712	10.7837	5.17405	10.7837	3.93035
10.7918	4.0271	10.792	3.5589	10.7917	4.11805	10.792	4.5619	10.7917	4.04095	10.7918	4.15855	10.792	5.13485	10.792	3.92175
10.8002	4.0259	10.8003	3.5827	10.8	4.1094	10.8003	4.5574	10.8	4.03505	10.8002	4.14895	10.8003	5.0907	10.8003	3.91495
10.8085	4.025	10.8087	3.6	10.8083	4.10045	10.8087	4.55485	10.8083	4.0316	10.8085	4.13885	10.8087	5.04895	10.8087	3.9087
10.8168	4.0228	10.817	3.6079	10.8167	4.09085	10.817	4.54815	10.8167	4.02565	10.8168	4.1274	10.817	5.00215	10.817	3.90125
10.8252	4.02235	10.8253	3.61435	10.825	4.0822	10.8253	4.5427	10.825	4.02045	10.8252	4.11645	10.8253	4.9565	10.8253	3.8944
10.8335	4.0178	10.8337	3.6156	10.8333	4.071	10.8337	4.534	10.8333	4.0145	10.8335	4.10385	10.8337	4.9104	10.8337	3.88565
10.8418	4.0129	10.842	3.61525	10.8417	4.0598	10.842	4.5279	10.8417	4.01015	10.8418	4.09175	10.842	4.86355	10.842	3.87845
10.8502	4.01005	10.8503	3.61585	10.85	4.04855	10.8503	4.5196	10.85	4.0059	10.8502	4.0812	10.8503	4.81405	10.8503	3.8728
10.8585	4.0049	10.8587	3.61105	10.8583	4.0379	10.8587	4.513	10.8583	4.0024	10.8585	4.07145	10.8587	4.76725	10.8587	3.8661
10.8668	3.9985	10.867	3.60515	10.8667	4.02575	10.867	4.5027	10.8667	3.99695	10.8668	4.05945	10.867	4.71535	10.867	3.858
10.8752	3.99275	10.8753	3.59885	10.875	4.0156	10.8753	4.49185	10.875	3.9924	10.8752	4.04745	10.8753	4.66495	10.8753	3.85335
10.8835	3.98615	10.8837	3.59155	10.8833	4.00385	10.8837	4.48185	10.8833	3.98675	10.8835	4.0367	10.8837	4.6163	10.8837	3.8479
10.8918	3.97885	10.892	3.58265	10.8917	3.9935	10.892	4.4705	10.8917	3.9789	10.8918	4.0246	10.892	4.5656	10.892	3.8407
10.9002	3.96915	10.9003	3.5748	10.9	3.98135	10.9003	4.4598	10.9	3.97505	10.9002	4.01375	10.9003	4.51575	10.9003	3.83615
10.9085	3.9602	10.9087	3.56515	10.9083	3.97045	10.9087	4.4487	10.9083	3.96655	10.9085	4.0029	10.9087	4.4641	10.9087	3.8283
10.9168	3.9523	10.917	3.55715	10.9167	3.96005	10.917	4.43665	10.9167	3.96055	10.9168	3.98945	10.917	4.41035	10.917	3.82225
10.9252	3.94195	10.9253	3.5493	10.925	3.94935	10.9253	4.42545	10.925	3.95115	10.9252	3.9787	10.9253	4.3616	10.9253	3.81355
10.9335	3.9315	10.9337	3.54115	10.9333	3.93545	10.9337	4.41175	10.9333	3.94285	10.9335	3.9673	10.9337	4.30665	10.9337	3.80525
10.9418	3.91915	10.942	3.53405	10.9417	3.9245	10.942	4.39645	10.9417	3.9316	10.9418	3.9549	10.942	4.2544	10.942	3.7966
10.9502	3.91055	10.9503	3.53085	10.95	3.9138	10.9503	4.38595	10.95	3.9234	10.9502	3.9453	10.9503	4.1997	10.9503	3.79015
10.9585	3.89835	10.9587	3.52365	10.9583	3.9023	10.9587	4.37045	10.9583	3.91205	10.9585	3.93115	10.9587	4.14675	10.9587	3.77755
10.9668	3.88585	10.967	3.5192	10.9667	3.8911	10.967	4.3581	10.9667	3.90185	10.9668	3.9189	10.967	4.093	10.967	3.767
10.9752	3.8741	10.9753	3.51405	10.975	3.87695	10.9753	4.34385	10.975	3.89065	10.9752	3.9058	10.9753	4.0408	10.9753	3.75775
10.9835	3.86305	10.9837	3.5098	10.9833	3.86595	10.9837	4.33115	10.9833	3.8797	10.9835	3.89485	10.9837	3.98385	10.9837	3.74825
10.9918	3.8513	10.992	3.5041	10.9917	3.85265	10.992	4.3169	10.9917	3.869	10.9918	3.8826	10.992	3.9273	10.992	3.7378
11.0002	3.8389	11.0003	3.50005	11	3.84255	11.0003	4.3033	11	3.8584	11.0002	3.8705	11.0003	3.87195	11.0003	3.72805
11.0085	3.82915	11.0087	3.4942	11.0083	3.83145	11.0087	4.2909	11.0083	3.8481	11.0085	3.8572	11.0087	3.8153	11.0087	3.7185
11.0168	3.8175	11.017	3.4903	11.0167	3.81905	11.017	4.27895	11.0167	3.83725	11.0168	3.84465	11.017	3.76105	11.017	3.7061
11.0252	3.8065	11.0253	3.48325	11.025	3.8054	11.0253	4.26505	11.025	3.8266	11.0252	3.8306	11.0253	3.70605	11.0253	3.6949
11.0335	3.7955	11.0337	3.47835	11.0333	3.794	11.0337	4.2524	11.0333	3.8167	11.0335	3.8182	11.0337	3.64905	11.0337	3.6843
11.0418	3.7844	11.042	3.4696	11.0417	3.7805	11.042	4.2403	11.0417	3.805	11.0418	3.8048	11.042	3.59095	11.042	3.67295
11.0502	3.77265	11.0503	3.4639	11.05	3.7673	11.0503	4.22675	11.05	3.7941	11.0502	3.7907	11.0503	3.5391	11.0503	3.6602
11.0585	3.76355	11.0587	3.45565	11.0583	3.75575	11.0587	4.21385	11.0583	3.7835	11.0585	3.77875	11.0587	3.4802	11.0587	3.649
11.0668	3.7518	11.067	3.4462	11.0667	3.74075	11.067	4.20025	11.0667	3.7713	11.0668	3.7633	11.067	3.42335	11.067	3.6359
11.0752	3.74035	11.0753	3.43655	11.075	3.7285	11.0753	4.18725	11.075	3.7597	11.0752	3.74755	11.0753	3.36195	11.0753	3.62575
11.0835	3.73115	11.0837	3.42785	11.0833	3.71645	11.0837	4.17455	11.0833	3.7493	11.0835	3.7336	11.0837	3.30455	11.0837	3.61345
11.0918	3.7196	11.092	3.41795	11.0917	3.70345	11.092	4.1631	11.0917	3.73805	11.0918	3.72005	11.092	3.2446	11.092	3.60085
11.1002	3.7091	11.1003	3.4068	11.1	3.6889	11.1003	4.15085	11.1	3.72535	11.1002	3.70385	11.1003	3.1883	11.1003	3.58735
11.1085	3.70005	11.1087	3.3957	11.1083	3.676	11.1087	4.1395	11.1083	3.71525	11.1085	3.6899	11.1087	3.1284	11.1087	3.57585
11.1168	3.6887	11.117	3.3852	11.1167	3.66145	11.117	4.12565	11.1167	3.70445	11.1168	3.6743	11.117	3.06875	11.117	3.56295
11.1252	3.6755	11.1253	3.37235	11.125	3.64795	11.1253	4.11225	11.125	3.69135	11.1252	3.6579	11.1253	3.00725	11.1253	3.54975
11.1335	3.6655	11.1337	3.3604	11.1333	3.6322	11.1337	4.0994	11.1333	3.68035	11.1335	3.64355	11.1337	2.94695	11.1337	3.5372
11.1418	3.6567	11.142	3.3501	11.1417	3.6195	11.142	4.08965	11.1417	3.67135	11.1418	3.6294	11.142	2.8877	11.142	3.52515
11.1502	3.6448	11.1503	3.3343	11.15	3.6049	11.1503	4.07535	11.15	3.65855	11.1502	3.61195	11.1503	2.82715	11.1503	3.5097
11.1585	3.63045	11.1587	3.3206	11.1583	3.58765	11.1587	4.0606	11.1583	3.6447	11.1585	3.5948	11.1587	2.7658	11.1587	3.49445
11.1668	3.61805	11.167	3.30455	11.1667	3.5726	11.167	4.04655	11.1667	3.6305	11.1668	3.57945	11.167	2.70595	11.167	3.47895
11.1752	3.6062	11.1753	3.29085	11.175	3.55785	11.1753	4.03405	11.175	3.6199	11.1752	3.5638	11.1753	2.6473	11.1753	3.46555
11.1835	3.59445	11.1837	3.2772	11.1833	3.54245	11.1837	4.01995	11.1833	3.60715	11.1835	3.54875	11.1837	2.58445	11.1837	3.4514
11.1918	3.5833	11.192	3.26265	11.1917	3.52905	11.192	4.0061	11.1917	3.596	11.1918	3.53385	11.192	2.52305	11.192	3.4372
11.2002	3.57	11.2003	3.24645	11.2	3.51245	11.2003	3.99155	11.2	3.58155	11.2002	3.5151	11.2003	2.46235	11.2003	3.42305
11.2085	3.55825	11.2087	3.2309	11.2083	3.49755	11.2087	3.9784	11.2083	3.5689	11.2085	3.50115	11.2087	2.40005	11.2087	3.4088
11.2168	3.5433	11.217	3.2118	11.2167	3.481	11.217	3.96465	11.2167	3.5561	11.2168	3.483	11.217	2.33925	11.217	3.3918
11.2252	3.5324	11.2253	3.1973	11.225	3.4661	11.2253	3.9507	11.225	3.54295	11.2252	3.4681	11.2253	2.27955	11.2253	3.3788
11.2335	3.51875	11.2337	3.1809	11.2333	3.4495	11.2337	3.9359	11.2333	3.5293	11.2335	3.45335	11.2337	2.21965	11.2337	3.36405
11.2418	3.50465	11.242	3.1635	11.2417	3.4342	11.242	3.91985	11.2417	3.51645	11.2418	3.43745	11.242	2.1578	11.242	3.34905
11.2502	3.4905	11.2503	3.14595	11.25	3.4202	11.2503	3.90485	11.25	3.5025	11.2502	3.4205	11.2503	2.09955	11.2503	3.33485
11.2585	3.47915	11.2587	3.12765	11.2583	3.4039	11.2587	3.88935	11.2583	3.48695	11.2585	3.4039	11.2587	2.03975	11.2587	3.3191
11.2668	3.4635	11.267	3.10755	11.2667	3.3879	11.267	3.8727	11.2667	3.4731	11.2668	3.38475	11.267	1.9792	11.267	3.30295
11.2752	3.4476	11.2753	3.0882	11.275	3.37095	11.2753	3.8558	11.275	3.4576	11.2752	3.36645	11.2753	1.9188	11.2753	3.28645
11.2835	3.4333	11.2837	3.0696	11.2833	3.356	11.2837	3.8414	11.2833	3.4444	11.2835	3.35135	11.2837	1.8636	11.2837	3.2697
11.2918	3.417	11.292	3.04695	11.2917	3.3391	11.292	3.82385	11.2917	3.42805	11.2918	3.32945	11.292	1.8061	11.292	3.25245
11.3002	3.405	11.3003	3.0293	11.3	3.3253	11.3003	3.8103	11.3	3.41525	11.3002	3.31325	11.3003	1.7494	11.3003	3.2383
11.3085	3.3899	11.3087	3.0094	11.3083	3.31035	11.3087	3.794	11.3083	3.40085	11.3085	3.29365	11.3087	1.69475	11.3087	3.22375
11.3168	3.374	11.317	2.98725	11.3167	3.291	11.317	3.77625	11.3167	3.38635	11.3168	3.2713	11.317	1.63895	11.317	3.20595
11.3252	3.36005	11.3253	2.96695	11.325	3.27545	11.3253	3.76055	11.325	3.3704	11.3252	3.25095	11.3253	1.58145	11.3253	3.19015
11.3335	3.3425	11.3337	2.94475	11.3333	3.25905	11.3337	3.74345	11.3333	3.35555	11.3335	3.227	11.3337	1.52905	11.3337	3.17075
11.3418	3.32655	11.342	2.92325	11.3417	3.24015	11.342	3.72605	11.3417	3.33895	11.3418	3.2045	11.342	1.47705	11.342	3.15215
11.3502	3.31145	11.3503	2.901	11.35	3.2211	11.3503	3.7099	11.35	3.32485	11.3502	3.18045	11.3503	1.42235	11.3503	3.13435
11.3585	3.29435	11.3587	2.8776	11.3583	3.20335	11.3587	3.69085	11.3583	3.308	11.3585	3.15475	11.3587	1.36885	11.3587	3.11465
11.3668	3.27975	11.367	2.85565	11.3667	3.1861	11.367	3.6741	11.3667	3.2939	11.3668	3.12985	11.367	1.31795	11.367	3.09535
11.3752	3.26355	11.3753	2.8352	11.375	3.16495	11.3753	3.6565	11.375	3.27885	11.3752	3.10455	11.3753	1.2673	11.3753	3.07615
11.3835	3.2487	11.3837	2.81155	11.3833	3.14325	11.3837	3.63895	11.3833	3.26205	11.3835	3.07645	11.3837	1.2141	11.3837	3.05595
11.3918	3.23325	11.392	2.7891	11.3917	3.1236	11.392	3.6212	11.3917	3.2473	11.3918	3.04955	11.392	1.16785	11.392	3.03835
11.4002	3.2179	11.4003	2.76595	11.4	3.0976	11.4003	3.60165	11.4	3.2304	11.4002	3.02015	11.4003	1.12075	11.4003	3.01635
11.4085	3.2023	11.4087	2.74335	11.4083	3.0748	11.4087	3.5837	11.4083	3.214	11.4085	2.99085	11.4087	1.07315	11.4087	2.9954
11.4168	3.18625	11.417	2.71995	11.4167	3.0513	11.417	3.5649	11.4167	3.1988	11.4168	2.9627	11.417	1.0265	11.417	2.9755
11.4252	3.1706	11.4253	2.69715	11.425	3.0253	11.4253	3.54415	11.425	3.18085	11.4252	2.9314	11.4253	0.983101	11.4253	2.95265
11.4335	3.15455	11.4337	2.67315	11.4333	2.9986	11.4337	3.5235	11.4333	3.16345	11.4335	2.901	11.4337	0.939301	11.4337	2.92995
11.4418	3.13885	11.442	2.65065	11.4417	2.9721	11.442	3.5039	11.4417	3.1443	11.4418	2.87175	11.442	0.896951	11.442	2.9078
11.4502	3.12165	11.4503	2.6259	11.45	2.9439	11.4503	3.4815	11.45	3.1235	11.4502	2.83895	11.4503	0.856701	11.4503	2.8831
11.4585	3.1033	11.4587	2.60275	11.4583	2.91365	11.4587	3.4579	11.4583	3.1025	11.4585	2.80725	11.4587	0.813651	11.4587	2.8588
11.4668	3.0841	11.467	2.57995	11.4667	2.88495	11.467	3.43495	11.4667	3.08275	11.4668	2.7769	11.467	0.776151	11.467	2.8328
11.4752	3.0672	11.4753	2.55675	11.475	2.85655	11.4753	3.41045	11.475	3.06185	11.4752	2.7463	11.4753	0.738701	11.4753	2.80905
11.4835	3.0488	11.4837	2.53475	11.4833	2.8265	11.4837	3.3848	11.4833	3.0378	11.4835	2.7143	11.4837	0.701201	11.4837	2.7839
11.4918	3.02845	11.492	2.51065	11.4917	2.7971	11.492	3.3612	11.4917	3.014	11.4918	2.68425	11.492	0.664851	11.492	2.7591
11.5002	3.00755	11.5003	2.48825	11.5	2.7665	11.5003	3.33175	11.5	2.99005	11.5002	2.6507	11.5003	0.629101	11.5003	2.72965
11.5085	2.9862	11.5087	2.46505	11.5083	2.735	11.5087	3.30485	11.5083	2.96415	11.5085	2.62075	11.5087	0.597151	11.5087	2.70465
11.5168	2.96145	11.517	2.44325	11.5167	2.7038	11.517	3.2762	11.5167	2.9381	11.5168	2.5884	11.517	0.562801	11.517	2.67575
11.5252	2.938	11.5253	2.41955	11.525	2.67345	11.5253	3.24795	11.525	2.9111	11.5252	2.5563	11.5253	0.530401	11.5253	2.6488
11.5335	2.9134	11.5337	2.39655	11.5333	2.6416	11.5337	3.21905	11.5333	2.8837	11.5335	2.52445	11.5337	0.500201	11.5337	2.6202
11.5418	2.8886	11.542	2.3703	11.5417	2.6112	11.542	3.18845	11.5417	2.8537	11.5418	2.4915	11.542	0.471401	11.542	2.5922
11.5502	2.8616	11.5503	2.3446	11.55	2.5778	11.5503	3.1583	11.55	2.82495	11.5502	2.4591	11.5503	0.443101	11.5503	2.56155
11.5585	2.8361	11.5587	2.3196	11.5583	2.5486	11.5587	3.12935	11.5583	2.7971	11.5585	2.42845	11.5587	0.413351	11.5587	2.53445
11.5668	2.8071	11.567	2.2913	11.5667	2.5167	11.567	3.09765	11.5667	2.76655	11.5668	2.39475	11.567	0.387801	11.567	2.50525
11.5752	2.77795	11.5753	2.2629	11.575	2.4847	11.5753	3.06665	11.575	2.73415	11.5752	2.3626	11.5753	0.365901	11.5753	2.4768
11.5835	2.74995	11.5837	2.2334	11.5833	2.4523	11.5837	3.0355	11.5833	2.70365	11.5835	2.3293	11.5837	0.337001	11.5837	2.4488
11.5918	2.7182	11.592	2.2032	11.5917	2.41995	11.592	3.003	11.5917	2.6719	11.5918	2.29505	11.592	0.31575	11.592	2.4159
11.6002	2.68915	11.6003	2.17135	11.6	2.3894	11.6003	2.97165	11.6	2.64185	11.6002	2.2651	11.6003	0.2908	11.6003	2.38715
11.6085	2.66005	11.6087	2.1385	11.6083	2.357	11.6087	2.94055	11.6083	2.61115	11.6085	2.2316	11.6087	0.27055	11.6087	2.3586
11.6168	2.6298	11.617	2.1031	11.6167	2.3242	11.617	2.90845	11.6167	2.581	11.6168	2.19915	11.617	0.24995	11.617	2.32585
11.6252	2.5989	11.6253	2.0717	11.625	2.2922	11.6253	2.876	11.625	2.5468	11.6252	2.1672	11.6253	0.23075	11.6253	2.29665
11.6335	2.56935	11.6337	2.036	11.6333	2.2604	11.6337	2.845	11.6333	2.51815	11.6335	2.1321	11.6337	0.2097	11.6337	2.2667
11.6418	2.5382	11.642	1.9983	11.6417	2.22825	11.642	2.81075	11.6417	2.4849	11.6418	2.09935	11.642	0.19125	11.642	2.2338
11.6502	2.50435	11.6503	1.96035	11.65	2.1927	11.6503	2.77735	11.65	2.45015	11.6502	2.06345	11.6503	0.17475	11.6503	2.2002
11.6585	2.47325	11.6587	1.92205	11.6583	2.16035	11.6587	2.74395	11.6583	2.419	11.6585	2.0286	11.6587	0.15685	11.6587	2.16705
11.6668	2.4424	11.667	1.8851	11.6667	2.12735	11.667	2.7116	11.6667	2.38725	11.6668	1.9964	11.667	0.13835	11.667	2.1351
11.6752	2.40965	11.6753	1.84675	11.675	2.09295	11.6753	2.67755	11.675	2.35325	11.6752	1.962	11.6753	0.1229	11.6753	2.1007
11.6835	2.3774	11.6837	1.80825	11.6833	2.06185	11.6837	2.64105	11.6833	2.32135	11.6835	1.92675	11.6837	0.1062	11.6837	2.066
11.6918	2.34415	11.692	1.76915	11.6917	2.02705	11.692	2.6071	11.6917	2.2884	11.6918	1.89255	11.692	0.09395	11.692	2.03245
11.7002	2.314	11.7003	1.7307	11.7	1.99465	11.7003	2.5722	11.7	2.25595	11.7002	1.8594	11.7003	0.07795	11.7003	1.9988
11.7085	2.2807	11.7087	1.69225	11.7083	1.96075	11.7087	2.5381	11.7083	2.22355	11.7085	1.8238	11.7087	0.06475	11.7087	1.963
11.7168	2.24735	11.717	1.6517	11.7167	1.9261	11.717	2.502	11.7167	2.19125	11.7168	1.789	11.717	0.05085	11.717	1.92475
11.7252	2.21605	11.7253	1.614	11.725	1.8929	11.7253	2.46825	11.725	2.15785	11.7252	1.75665	11.7253	0.0381	11.7253	1.8894
11.7335	2.1826	11.7337	1.57495	11.7333	1.8567	11.7337	2.4315	11.7333	2.12365	11.7335	1.72055	11.7337	0.02625	11.7337	1.85305
11.7418	2.14905	11.742	1.5365	11.7417	1.8236	11.742	2.3935	11.7417	2.0898	11.7418	1.6845	11.742	0.0132	11.742	1.81495
11.7502	2.1174	11.7503	1.49895	11.75	1.78965	11.7503	2.35785	11.75	2.0575	11.7502	1.6516	11.7503	0.00135	11.7503	1.77835
11.7585	2.0846	11.7587	1.4593	11.7583	1.7542	11.7587	2.32075	11.7583	2.0243	11.7585	1.6167	11.7587	-0.01075	11.7587	1.74325
11.7668	2.05065	11.767	1.42065	11.7667	1.71985	11.767	2.2829	11.7667	1.98985	11.7668	1.5817	11.767	-0.0204	11.767	1.70595
11.7752	2.0172	11.7753	1.384	11.775	1.68605	11.7753	2.2444	11.775	1.9563	11.7752	1.54715	11.7753	-0.03135	11.7753	1.6674
11.7835	1.98385	11.7837	1.3454	11.7833	1.6496	11.7837	2.20645	11.7833	1.92195	11.7835	1.5142	11.7837	-0.0401	11.7837	1.6308
11.7918	1.95225	11.792	1.30915	11.7917	1.6169	11.792	2.1697	11.7917	1.88805	11.7918	1.4806	11.792	-0.05115	11.792	1.594
11.8002	1.91845	11.8003	1.27345	11.8	1.583	11.8003	2.1324	11.8	1.8545	11.8002	1.44785	11.8003	-0.059	11.8003	1.5569
11.8085	1.88605	11.8087	1.2368	11.8083	1.5494	11.8087	2.0953	11.8083	1.8204	11.8085	1.41385	11.8087	-0.07045	11.8087	1.52105
11.8168	1.8509	11.817	1.20105	11.8167	1.5154	11.817	2.0574	11.8167	1.7855	11.8168	1.38125	11.817	-0.0789	11.817	1.48405
11.8252	1.82	11.8253	1.16715	11.825	1.48185	11.8253	2.02055	11.825	1.7531	11.8252	1.349	11.8253	-0.08635	11.8253	1.44865
11.8335	1.78485	11.8337	1.1309	11.8333	1.44755	11.8337	1.98205	11.8333	1.71695	11.8335	1.31555	11.8337	-0.09565	11.8337	1.4128
11.8418	1.75225	11.842	1.09715	11.8417	1.41535	11.842	1.9454	11.8417	1.68305	11.8418	1.2845	11.842	-0.1001	11.842	1.377
11.8502	1.7199	11.8503	1.0654	11.85	1.3831	11.8503	1.9073	11.85	1.65005	11.8502	1.25415	11.8503	-0.10665	11.8503	1.34135
11.8585	1.6861	11.8587	1.03095	11.8583	1.3494	11.8587	1.87075	11.8583	1.61555	11.8585	1.2225	11.8587	-0.11555	11.8587	1.30655
11.8668	1.6523	11.867	0.99615	11.8667	1.31645	11.867	1.83335	11.8667	1.5801	11.8668	1.1937	11.867	-0.12205	11.867	1.27225
11.8752	1.6193	11.8753	0.96295	11.875	1.28305	11.8753	1.7934	11.875	1.5438	11.8752	1.16105	11.8753	-0.1299	11.8753	1.23605
11.8835	1.58495	11.8837	0.93245	11.8833	1.25275	11.8837	1.7564	11.8833	1.50925	11.8835	1.13305	11.8837	-0.1372	11.8837	1.20085
11.8918	1.55035	11.892	0.9013	11.8917	1.22035	11.892	1.7164	11.8917	1.4738	11.8918	1.1045	11.892	-0.141	11.892	1.16745
11.9002	1.5152	11.9003	0.8712	11.9	1.18915	11.9003	1.67855	11.9	1.439	11.9002	1.0755	11.9003	-0.1464	11.9003	1.13265
11.9085	1.48125	11.9087	0.8426	11.9083	1.15865	11.9087	1.64265	11.9083	1.4032	11.9085	1.0487	11.9087	-0.15165	11.9087	1.0999
11.9168	1.44855	11.917	0.81405	11.9167	1.1286	11.917	1.60665	11.9167	1.36905	11.9168	1.02045	11.917	-0.15805	11.917	1.0663
11.9252	1.4154	11.9253	0.78605	11.925	1.09875	11.9253	1.569	11.925	1.33335	11.9252	0.9938	11.9253	-0.1617	11.9253	1.0346
11.9335	1.38235	11.9337	0.76185	11.9333	1.0717	11.9337	1.53425	11.9333	1.2997	11.9335	0.9697	11.9337	-0.168	11.9337	1.0039
11.9418	1.3488	11.942	0.7352	11.9417	1.0412	11.942	1.495	11.9417	1.26675	11.9418	0.94385	11.942	-0.17155	11.942	0.9702
11.9502	1.3144	11.9503	0.70885	11.95	1.01385	11.9503	1.46015	11.95	1.2305	11.9502	0.91875	11.9503	-0.1747	11.9503	0.9396
11.9585	1.2838	11.9587	0.6858	11.9583	0.98765	11.9587	1.4252	11.9583	1.1973	11.9585	0.89655	11.9587	-0.17945	11.9587	0.9117
11.9668	1.2485	11.967	0.6607	11.9667	0.9585	11.967	1.38785	11.9667	1.1627	11.9668	0.8724	11.967	-0.1844	11.967	0.8805
11.9752	1.2176	11.9753	0.6417	11.975	0.9344	11.9753	1.3548	11.975	1.13155	11.9752	0.85205	11.9753	-0.1882	11.9753	0.85495
11.9835	1.18585	11.9837	0.6205	11.9833	0.9071	11.9837	1.3193	11.9833	1.0974	11.9835	0.82825	11.9837	-0.19	11.9837	0.8265
11.9918	1.1547	11.992	0.6017	11.9917	0.88245	11.992	1.2867	11.9917	1.0639	11.9918	0.8102	11.992	-0.196	11.992	0.799
12.0002	1.1227	12.0003	0.5814	12	0.86015	12.0003	1.2529	12	1.0325	12.0002	0.78915	12.0003	-0.2007	12.0003	0.773
12.0085	1.0901	12.0087	0.5637	12.0083	0.8348	12.0087	1.2193	12.0083	1.0004	12.0085	0.77085	12.0087	-0.20445	12.0087	0.7461
12.0168	1.05925	12.017	0.5465	12.0167	0.81255	12.017	1.18715	12.0167	0.96895	12.0168	0.75175	12.017	-0.21005	12.017	0.72235
12.0252	1.0285	12.0253	0.53075	12.025	0.7907	12.0253	1.1564	12.025	0.93815	12.0252	0.73365	12.0253	-0.2136	12.0253	0.69855
12.0335	0.998	12.0337	0.51405	12.0333	0.7686	12.0337	1.12455	12.0333	0.9079	12.0335	0.7185	12.0337	-0.2167	12.0337	0.6728
12.0418	0.9685	12.042	0.4999	12.0417	0.74775	12.042	1.09505	12.0417	0.87835	12.0418	0.70255	12.042	-0.2208	12.042	0.6514
12.0502	0.93905	12.0503	0.4851	12.05	0.72995	12.0503	1.0664	12.05	0.8499	12.0502	0.68725	12.0503	-0.22225	12.0503	0.6297
12.0585	0.9109	12.0587	0.473	12.0583	0.7116	12.0587	1.0374	12.0583	0.8211	12.0585	0.6732	12.0587	-0.2264	12.0587	0.60895
12.0668	0.88235	12.067	0.45985	12.0667	0.69145	12.067	1.00895	12.0667	0.79345	12.0668	0.65775	12.067	-0.23005	12.067	0.5889
12.0752	0.8533	12.0753	0.44555	12.075	0.67365	12.0753	0.9802	12.075	0.76625	12.0752	0.6436	12.0753	-0.23385	12.0753	0.5686
12.0835	0.8277	12.0837	0.4365	12.0833	0.6584	12.0837	0.95795	12.0833	0.7433	12.0835	0.6327	12.0837	-0.23555	12.0837	0.55135
12.0918	0.8022	12.092	0.42655	12.0917	0.64205	12.092	0.9317	12.0917	0.71785	12.0918	0.6204	12.092	-0.2382	12.092	0.5317
12.1002	0.77745	12.1003	0.4158	12.1	0.6261	12.1003	0.9079	12.1	0.6936	12.1002	0.6086	12.1003	-0.2394	12.1003	0.5152
12.1085	0.75005	12.1087	0.4047	12.1083	0.6102	12.1087	0.88225	12.1083	0.6711	12.1085	0.59585	12.1087	-0.24485	12.1087	0.49525
12.1168	0.72565	12.117	0.3963	12.1167	0.59525	12.117	0.8596	12.1167	0.64895	12.1168	0.5845	12.117	-0.2469	12.117	0.4792
12.1252	0.70205	12.1253	0.38825	12.125	0.5831	12.1253	0.83545	12.125	0.62695	12.1252	0.57545	12.1253	-0.24925	12.1253	0.4637
12.1335	0.6795	12.1337	0.37865	12.1333	0.56855	12.1337	0.81385	12.1333	0.6061	12.1335	0.5646	12.1337	-0.2528	12.1337	0.44885
12.1418	0.6576	12.142	0.3722	12.1417	0.5571	12.142	0.7935	12.1417	0.588	12.1418	0.5547	12.142	-0.2559	12.142	0.4354
12.1502	0.6363	12.1503	0.36545	12.15	0.54475	12.1503	0.77495	12.15	0.5692	12.1502	0.5447	12.1503	-0.25695	12.1503	0.42115
12.1585	0.61475	12.1587	0.35715	12.1583	0.5313	12.1587	0.7551	12.1583	0.55255	12.1585	0.53555	12.1587	-0.261	12.1587	0.408
12.1668	0.5955	12.167	0.34975	12.1667	0.52075	12.167	0.73665	12.1667	0.5354	12.1668	0.52775	12.167	-0.26385	12.167	0.3959
12.1752	0.5773	12.1753	0.34535	12.175	0.51195	12.1753	0.7199	12.175	0.51985	12.1752	0.52025	12.1753	-0.26705	12.1753	0.38475
12.1835	0.5579	12.1837	0.33855	12.1833	0.49895	12.1837	0.7004	12.1833	0.5019	12.1835	0.5108	12.1837	-0.26965	12.1837	0.3716
12.1918	0.54175	12.192	0.3337	12.1917	0.4893	12.192	0.68755	12.1917	0.48935	12.1918	0.50565	12.192	-0.2745	12.192	0.3632
12.2002	0.525	12.2003	0.3288	12.2	0.4808	12.2003	0.67005	12.2	0.47425	12.2002	0.49755	12.2003	-0.2747	12.2003	0.35345
12.2085	0.50975	12.2087	0.32365	12.2083	0.47295	12.2087	0.65535	12.2083	0.4607	12.2085	0.49135	12.2087	-0.27715	12.2087	0.3426
12.2168	0.4918	12.217	0.3173	12.2167	0.46245	12.217	0.6401	12.2167	0.446	12.2168	0.48335	12.217	-0.27855	12.217	0.33185
12.2252	0.47745	12.2253	0.3132	12.225	0.4548	12.2253	0.62825	12.225	0.43355	12.2252	0.478	12.2253	-0.2825	12.2253	0.3236
12.2335	0.46385	12.2337	0.3096	12.2333	0.44605	12.2337	0.6144	12.2333	0.42225	12.2335	0.47245	12.2337	-0.28615	12.2337	0.3144
12.2418	0.4495	12.242	0.3038	12.2417	0.4394	12.242	0.6015	12.2417	0.41105	12.2418	0.4654	12.242	-0.28885	12.242	0.30555
12.2502	0.43675	12.2503	0.29965	12.25	0.4315	12.2503	0.58775	12.25	0.4005	12.2502	0.45975	12.2503	-0.2908	12.2503	0.29735
12.2585	0.42525	12.2587	0.2971	12.2583	0.4265	12.2587	0.576	12.2583	0.38855	12.2585	0.45435	12.2587	-0.29335	12.2587	0.29115
12.2668	0.4118	12.267	0.29375	12.2667	0.4202	12.267	0.56585	12.2667	0.37925	12.2668	0.4489	12.267	-0.2961	12.267	0.2845
12.2752	0.40195	12.2753	0.28855	12.275	0.41425	12.2753	0.55505	12.275	0.36885	12.2752	0.444	12.2753	-0.29905	12.2753	0.2766
12.2835	0.3905	12.2837	0.2841	12.2833	0.4065	12.2837	0.5443	12.2833	0.35895	12.2835	0.4381	12.2837	-0.3024	12.2837	0.26985
12.2918	0.37885	12.292	0.28025	12.2917	0.39925	12.292	0.5335	12.2917	0.3485	12.2918	0.43405	12.292	-0.30145	12.292	0.26225
12.3002	0.3696	12.3003	0.27765	12.3	0.39485	12.3003	0.52555	12.3	0.34075	12.3002	0.4296	12.3003	-0.3052	12.3003	0.2585
12.3085	0.36155	12.3087	0.27605	12.3083	0.38965	12.3087	0.51435	12.3083	0.33295	12.3085	0.42545	12.3087	-0.30575	12.3087	0.2522
12.3168	0.3509	12.317	0.27205	12.3167	0.3832	12.317	0.50515	12.3167	0.3261	12.3168	0.42085	12.317	-0.3055	12.317	0.24635
12.3252	0.34275	12.3253	0.2712	12.325	0.37915	12.3253	0.49735	12.325	0.3176	12.3252	0.41845	12.3253	-0.30705	12.3253	0.2422
12.3335	0.33335	12.3337	0.2654	12.3333	0.37345	12.3337	0.48765	12.3333	0.30865	12.3335	0.4137	12.3337	-0.3082	12.3337	0.2365
12.3418	0.32595	12.342	0.2627	12.3417	0.36855	12.342	0.47915	12.3417	0.30255	12.3418	0.4104	12.342	-0.3074	12.342	0.23175
12.3502	0.3182	12.3503	0.26065	12.35	0.3653	12.3503	0.4718	12.35	0.29645	12.3502	0.40685	12.3503	-0.3135	12.3503	0.22695
12.3585	0.31165	12.3587	0.25875	12.3583	0.3614	12.3587	0.4666	12.3583	0.2917	12.3585	0.40395	12.3587	-0.3101	12.3587	0.22405
12.3668	0.3036	12.367	0.25665	12.3667	0.35625	12.367	0.45875	12.3667	0.2845	12.3668	0.4008	12.367	-0.3165	12.367	0.2189
12.3752	0.2968	12.3753	0.25475	12.375	0.35275	12.3753	0.4528	12.375	0.2789	12.3752	0.399	12.3753	-0.3151	12.3753	0.2162
12.3835	0.29155	12.3837	0.25155	12.3833	0.34895	12.3837	0.447	12.3833	0.2734	12.3835	0.3956	12.3837	-0.31795	12.3837	0.2125
12.3918	0.2851	12.392	0.2494	12.3917	0.34465	12.392	0.4396	12.3917	0.2672	12.3918	0.3933	12.392	-0.318	12.392	0.20765
12.4002	0.27795	12.4003	0.24655	12.4	0.34065	12.4003	0.4332	12.4	0.26165	12.4002	0.38915	12.4003	-0.3213	12.4003	0.20425
12.4085	0.27405	12.4087	0.24615	12.4083	0.33915	12.4087	0.4302	12.4083	0.2584	12.4085	0.3884	12.4087	-0.32295	12.4087	0.2028
12.4168	0.26845	12.417	0.2448	12.4167	0.33605	12.417	0.4243	12.4167	0.25305	12.4168	0.38585	12.417	-0.32315	12.417	0.20075
12.4252	0.26465	12.4253	0.2432	12.425	0.3326	12.4253	0.41865	12.425	0.2471	12.4252	0.3835	12.4253	-0.32485	12.4253	0.1965
12.4335	0.25925	12.4337	0.24055	12.4333	0.33	12.4337	0.41335	12.4333	0.24405	12.4335	0.3819	12.4337	-0.3242	12.4337	0.19435
12.4418	0.25455	12.442	0.2403	12.4417	0.32765	12.442	0.41035	12.4417	0.2406	12.4418	0.3797	12.442	-0.3265	12.442	0.1908
12.4502	0.25125	12.4503	0.2371	12.45	0.32575	12.4503	0.4049	12.45	0.23525	12.4502	0.37755	12.4503	-0.32925	12.4503	0.1891
12.4585	0.245	12.4587	0.23435	12.4583	0.3234	12.4587	0.40025	12.4583	0.2316	12.4585	0.376	12.4587	-0.32945	12.4587	0.1848
12.4668	0.2432	12.467	0.23355	12.4667	0.32115	12.467	0.39775	12.4667	0.2281	12.4668	0.3751	12.467	-0.33	12.467	0.1851
12.4752	0.238	12.4753	0.2321	12.475	0.31805	12.4753	0.39335	12.475	0.2237	12.4752	0.373	12.4753	-0.3325	12.4753	0.18225
12.4835	0.2316	12.4837	0.2298	12.4833	0.3154	12.4837	0.3887	12.4833	0.22005	12.4835	0.3706	12.4837	-0.33435	12.4837	0.1786
12.4918	0.2298	12.492	0.2272	12.4917	0.3136	12.492	0.38615	12.4917	0.21695	12.4918	0.36905	12.492	-0.3344	12.492	0.17725
12.5002	0.22755	12.5003	0.2271	12.5	0.3123	12.5003	0.3832	12.5	0.2154	12.5002	0.36915	12.5003	-0.3382	12.5003	0.17535
12.5085	0.2245	12.5087	0.2269	12.5083	0.31175	12.5087	0.38035	12.5083	0.2115	12.5085	0.3683	12.5087	-0.3366	12.5087	0.17415
12.5168	0.2203	12.517	0.2227	12.5167	0.309	12.517	0.37575	12.5167	0.20815	12.5168	0.36605	12.517	-0.3364	12.517	0.1715
12.5252	0.21685	12.5253	0.22275	12.525	0.30665	12.5253	0.37175	12.525	0.20395	12.5252	0.3631	12.5253	-0.33685	12.5253	0.16865
12.5335	0.21435	12.5337	0.22055	12.5333	0.30485	12.5337	0.36945	12.5333	0.2002	12.5335	0.3614	12.5337	-0.33475	12.5337	0.1673
12.5418	0.2113	12.542	0.22035	12.5417	0.30435	12.542	0.3674	12.5417	0.19705	12.5418	0.35995	12.542	-0.33685	12.542	0.16345
12.5502	0.2096	12.5503	0.21845	12.55	0.3026	12.5503	0.36325	12.55	0.19625	12.5502	0.36	12.5503	-0.33185	12.5503	0.16305
12.5585	0.20705	12.5587	0.21695	12.5583	0.3015	12.5587	0.3604	12.5583	0.19395	12.5585	0.36075	12.5587	-0.331	12.5587	0.16175
12.5668	0.20495	12.567	0.2167	12.5667	0.2998	12.567	0.3586	12.5667	0.19015	12.5668	0.35925	12.567	-0.3276	12.567	0.16105
12.5752	0.2028	12.5753	0.2152	12.575	0.29865	12.5753	0.357	12.575	0.1872	12.5752	0.3582	12.5753	-0.32565	12.5753	0.16035
12.5835	0.19935	12.5837	0.2133	12.5833	0.2959	12.5837	0.3536	12.5833	0.1845	12.5835	0.35655	12.5837	-0.3192	12.5837	0.15795
12.5918	0.1987	12.592	0.212	12.5917	0.2968	12.592	0.35105	12.5917	0.18275	12.5918	0.35535	12.592	-0.3173	12.592	0.15615
12.6002	0.19465	12.6003	0.21025	12.6	0.29515	12.6003	0.34855	12.6	0.1804	12.6002	0.35405	12.6003	-0.3119	12.6003	0.1534
12.6085	0.193	12.6087	0.2096	12.6083	0.2937	12.6087	0.34555	12.6083	0.17835	12.6085	0.3544	12.6087	-0.3086	12.6087	0.1519
12.6168	0.19215	12.617	0.2092	12.6167	0.29275	12.617	0.34555	12.6167	0.1769	12.6168	0.3523	12.617	-0.3002	12.617	0.151
12.6252	0.1898	12.6253	0.2065	12.625	0.2918	12.6253	0.34115	12.625	0.1741	12.6252	0.3513	12.6253	-0.2943	12.6253	0.1492
12.6335	0.1886	12.6337	0.20515	12.6333	0.2909	12.6337	0.3399	12.6333	0.1724	12.6335	0.35055	12.6337	-0.28745	12.6337	0.1487
12.6418	0.1875	12.642	0.20655	12.6417	0.2892	12.642	0.34055	12.6417	0.1708	12.6418	0.3514	12.642	-0.2808	12.642	0.1477
12.6502	0.18505	12.6503	0.2059	12.65	0.28845	12.6503	0.33705	12.65	0.1672	12.6502	0.3489	12.6503	-0.27255	12.6503	0.14385
12.6585	0.1832	12.6587	0.20595	12.6583	0.28835	12.6587	0.33695	12.6583	0.1662	12.6585	0.3498	12.6587	-0.2639	12.6587	0.14485
12.6668	0.18165	12.667	0.2049	12.6667	0.2874	12.667	0.33495	12.6667	0.16595	12.6668	0.34945	12.667	-0.255	12.667	0.1432
12.6752	0.1804	12.6753	0.20575	12.675	0.28765	12.6753	0.3346	12.675	0.1634	12.6752	0.34955	12.6753	-0.2446	12.6753	0.14385
12.6835	0.1783	12.6837	0.20415	12.6833	0.2862	12.6837	0.3312	12.6833	0.161	12.6835	0.3479	12.6837	-0.23845	12.6837	0.1421
12.6918	0.17765	12.692	0.2032	12.6917	0.2858	12.692	0.33015	12.6917	0.1598	12.6918	0.3484	12.692	-0.2272	12.692	0.1427
12.7002	0.1763	12.7003	0.20145	12.7	0.28435	12.7003	0.3303	12.7	0.1575	12.7002	0.3469	12.7003	-0.21595	12.7003	0.1408
12.7085	0.1754	12.7087	0.20105	12.7083	0.2837	12.7087	0.32805	12.7083	0.1577	12.7085	0.3454	12.7087	-0.205	12.7087	0.14
12.7168	0.17415	12.717	0.1998	12.7167	0.28265	12.717	0.32775	12.7167	0.1553	12.7168	0.34505	12.717	-0.1932	12.717	0.1397
12.7252	0.1732	12.7253	0.19995	12.725	0.28285	12.7253	0.3255	12.725	0.15545	12.7252	0.3459	12.7253	-0.1896	12.7253	0.13915
12.7335	0.1724	12.7337	0.19945	12.7333	0.2822	12.7337	0.32475	12.7333	0.1521	12.7335	0.3457	12.7337	-0.17875	12.7337	0.13875
12.7418	0.16905	12.742	0.19715	12.7417	0.28045	12.742	0.32205	12.7417	0.15135	12.7418	0.34395	12.742	-0.1688	12.742	0.1371
12.7502	0.16845	12.7503	0.1971	12.75	0.2807	12.7503	0.3216	12.75	0.1498	12.7502	0.3446	12.7503	-0.15895	12.7503	0.13605
12.7585	0.1678	12.7587	0.1978	12.7583	0.28075	12.7587	0.3208	12.7583	0.1492	12.7585	0.34605	12.7587	-0.15115	12.7587	0.1365
12.7668	0.16845	12.767	0.19735	12.7667	0.2804	12.767	0.32095	12.7667	0.14815	12.7668	0.3459	12.767	-0.1436	12.767	0.13545
12.7752	0.1667	12.7753	0.1982	12.775	0.281	12.7753	0.32015	12.775	0.14825	12.7752	0.3467	12.7753	-0.1325	12.7753	0.1372
12.7835	0.1633	12.7837	0.197	12.7833	0.27935	12.7837	0.3166	12.7833	0.14655	12.7835	0.34545	12.7837	-0.1274	12.7837	0.13405
12.7918	0.1637	12.792	0.19615	12.7917	0.2797	12.792	0.31655	12.7917	0.14465	12.7918	0.3456	12.792	-0.11925	12.792	0.13385
12.8002	0.16365	12.8003	0.1968	12.8	0.27995	12.8003	0.31745	12.8	0.1441	12.8002	0.34505	12.8003	-0.11705	12.8003	0.1334
12.8085	0.16255	12.8087	0.1949	12.8083	0.27995	12.8087	0.3162	12.8083	0.145	12.8085	0.3456	12.8087	-0.09845	12.8087	0.1342
12.8168	0.1644	12.817	0.19525	12.8167	0.2788	12.817	0.3151	12.8167	0.14245	12.8168	0.3447	12.817	-0.09075	12.817	0.13405
12.8252	0.1633	12.8253	0.19425	12.825	0.27835	12.8253	0.3141	12.825	0.1421	12.8252	0.3449	12.8253	-0.19855	12.8253	0.13435
12.8335	0.1633	12.8337	0.1955	12.8333	0.2798	12.8337	0.3159	12.8333	0.1422	12.8335	0.3455	12.8337	-0.1441	12.8337	0.13385
12.8418	0.1601	12.842	0.1921	12.8417	0.2785	12.842	0.3118	12.8417	0.14035	12.8418	0.34505	12.842	-0.0674	12.842	0.1332
12.8502	0.1604	12.8503	0.19125	12.85	0.27805	12.8503	0.3126	12.85	0.139	12.8502	0.34665	12.8503	-0.07195	12.8503	0.13245
12.8585	0.1583	12.8587	0.19035	12.8583	0.27795	12.8587	0.31365	12.8583	0.13955	12.8585	0.3467	12.8587	-0.0699	12.8587	0.13275
12.8668	0.15995	12.867	0.19245	12.8667	0.27815	12.867	0.3125	12.8667	0.13985	12.8668	0.3471	12.867	-0.0664	12.867	0.13295
12.8752	0.15915	12.8753	0.19225	12.875	0.27925	12.8753	0.3113	12.875	0.14055	12.8752	0.34945	12.8753	-0.06075	12.8753	0.1326
12.8835	0.1573	12.8837	0.1903	12.8833	0.28005	12.8837	0.31075	12.8833	0.13885	12.8835	0.34865	12.8837	-0.05615	12.8837	0.13255
12.8918	0.15565	12.892	0.18865	12.8917	0.27695	12.892	0.3092	12.8917	0.1366	12.8918	0.347	12.892	-0.05485	12.892	0.13175
12.9002	0.1553	12.9003	0.1869	12.9	0.27875	12.9003	0.30915	12.9	0.1369	12.9002	0.347	12.9003	-0.0479	12.9003	0.1321
12.9085	0.1565	12.9087	0.18665	12.9083	0.2783	12.9087	0.3091	12.9083	0.13835	12.9085	0.34865	12.9087	-0.04525	12.9087	0.1325
12.9168	0.15725	12.917	0.18715	12.9167	0.27865	12.917	0.30905	12.9167	0.1383	12.9168	0.3494	12.917	-0.04105	12.917	0.13185
12.9252	0.15485	12.9253	0.18715	12.925	0.27855	12.9253	0.3082	12.925	0.1388	12.9252	0.34935	12.9253	-0.0385	12.9253	0.13325
12.9335	0.1548	12.9337	0.18815	12.9333	0.2795	12.9337	0.30875	12.9333	0.1395	12.9335	0.35075	12.9337	-0.0321	12.9337	0.133
12.9418	0.15455	12.942	0.18605	12.9417	0.28035	12.942	0.30835	12.9417	0.1394	12.9418	0.35105	12.942	-0.0329	12.942	0.1327
12.9502	0.1532	12.9503	0.18455	12.95	0.27805	12.9503	0.30735	12.95	0.1383	12.9502	0.3506	12.9503	-0.02625	12.9503	0.13135
12.9585	0.15295	12.9587	0.18475	12.9583	0.2789	12.9587	0.30675	12.9583	0.1398	12.9585	0.35145	12.9587	-0.0209	12.9587	0.1322
12.9668	0.15085	12.967	0.18395	12.9667	0.27895	12.967	0.3057	12.9667	0.1391	12.9668	0.3518	12.967	-0.01585	12.967	0.13175
12.9752	0.1522	12.9753	0.1836	12.975	0.2793	12.9753	0.3067	12.975	0.13955	12.9752	0.3532	12.9753	-0.0174	12.9753	0.13185
12.9835	0.1516	12.9837	0.18495	12.9833	0.27965	12.9837	0.3064	12.9833	0.1396	12.9835	0.35405	12.9837	-0.0162	12.9837	0.1319
12.9918	0.15305	12.992	0.1846	12.9917	0.28025	12.992	0.30785	12.9917	0.14155	12.9918	0.3561	12.992	-0.0129	12.992	0.1329
13.0002	0.15055	13.0003	0.18245	13	0.27775	13.0003	0.3029	13	0.1407	13.0002	0.3546	13.0003	-0.0108	13.0003	0.13145
13.0085	0.15125	13.0087	0.1853	13.0083	0.2797	13.0087	0.30465	13.0083	0.1421	13.0085	0.3571	13.0087	-0.00925	13.0087	0.1332
13.0168	0.1487	13.017	0.1846	13.0167	0.2791	13.017	0.304	13.0167	0.1416	13.0168	0.3557	13.017	-0.0106	13.017	0.13175
13.0252	0.15065	13.0253	0.1856	13.025	0.28135	13.0253	0.30565	13.025	0.14165	13.0252	0.35825	13.0253	-0.0115	13.0253	0.13235
13.0335	0.15135	13.0337	0.1866	13.0333	0.28185	13.0337	0.3054	13.0333	0.14385	13.0335	0.35895	13.0337	-0.01485	13.0337	0.13495
13.0418	0.1494	13.042	0.18695	13.0417	0.2804	13.042	0.30405	13.0417	0.1437	13.0418	0.3592	13.042	-0.0154	13.042	0.1331
13.0502	0.1483	13.0503	0.1874	13.05	0.28115	13.0503	0.30435	13.05	0.1439	13.0502	0.3588	13.0503	-0.0188	13.0503	0.13485
13.0585	0.14825	13.0587	0.1896	13.0583	0.28165	13.0587	0.3051	13.0583	0.1447	13.0585	0.3606	13.0587	-0.02535	13.0587	0.13565
13.0668	0.14675	13.067	0.19005	13.0667	0.28115	13.067	0.3044	13.0667	0.1448	13.0668	0.36065	13.067	-0.0316	13.067	0.1343
13.0752	0.1482	13.0753	0.1916	13.075	0.28305	13.0753	0.3046	13.075	0.1463	13.0752	0.36235	13.0753	-0.03635	13.0753	0.1363
13.0835	0.14825	13.0837	0.1954	13.0833	0.28665	13.0837	0.3062	13.0833	0.14695	13.0835	0.36335	13.0837	-0.047	13.0837	0.13885
13.0918	0.1474	13.092	0.19735	13.0917	0.286	13.092	0.3068	13.0917	0.1489	13.0918	0.36495	13.092	-0.05465	13.092	0.13855
13.1002	0.1475	13.1003	0.19905	13.1	0.2884	13.1003	0.30915	13.1	0.1506	13.1002	0.36615	13.1003	-0.0675	13.1003	0.1418
13.1085	0.14745	13.1087	0.20065	13.1083	0.28835	13.1087	0.3097	13.1083	0.1505	13.1085	0.3664	13.1087	-0.0774	13.1087	0.14035
13.1168	0.1475	13.117	0.2021	13.1167	0.2893	13.117	0.30955	13.1167	0.1514	13.1168	0.36605	13.117	-0.09015	13.117	0.1416
13.1252	0.1462	13.1253	0.2028	13.125	0.2903	13.1253	0.3115	13.125	0.1522	13.1252	0.36575	13.1253	-0.1043	13.1253	0.14335
13.1335	0.14625	13.1337	0.2037	13.1333	0.2893	13.1337	0.3128	13.1333	0.1526	13.1335	0.3661	13.1337	-0.117	13.1337	0.14315
13.1418	0.14605	13.142	0.2054	13.1417	0.29005	13.142	0.3136	13.1417	0.153	13.1418	0.36445	13.142	-0.1322	13.142	0.14585
13.1502	0.1459	13.1503	0.20695	13.15	0.2911	13.1503	0.31585	13.15	0.15375	13.1502	0.3667	13.1503	-0.14435	13.1503	0.14765
13.1585	0.14405	13.1587	0.207	13.1583	0.29065	13.1587	0.31535	13.1583	0.1529	13.1585	0.36425	13.1587	-0.1566	13.1587	0.1467
13.1668	0.14565	13.167	0.2069	13.1667	0.29175	13.167	0.3179	13.1667	0.15455	13.1668	0.36645	13.167	-0.17345	13.167	0.1484
13.1752	0.14425	13.1753	0.2057	13.175	0.29265	13.1753	0.31965	13.175	0.15485	13.1752	0.3635	13.1753	-0.1868	13.1753	0.15005
13.1835	0.1445	13.1837	0.20555	13.1833	0.2902	13.1837	0.31955	13.1833	0.1561	13.1835	0.36315	13.1837	-0.19925	13.1837	0.15085
13.1918	0.1436	13.192	0.20565	13.1917	0.29135	13.192	0.32095	13.1917	0.15735	13.1918	0.36215	13.192	-0.21455	13.192	0.1531
13.2002	0.14365	13.2003	0.2049	13.2	0.28985	13.2003	0.32255	13.2	0.1571	13.2002	0.3623	13.2003	-0.227	13.2003	0.1537
13.2085	0.14395	13.2087	0.2037	13.2083	0.28895	13.2087	0.3229	13.2083	0.1574	13.2085	0.3611	13.2087	-0.237	13.2087	0.15385
13.2168	0.14275	13.217	0.2027	13.2167	0.28825	13.217	0.3227	13.2167	0.1584	13.2168	0.36055	13.217	-0.2494	13.217	0.1535
13.2252	0.14255	13.2253	0.19975	13.225	0.2873	13.2253	0.32345	13.225	0.15735	13.2252	0.3598	13.2253	-0.25765	13.2253	0.1534
13.2335	0.14255	13.2337	0.199	13.2333	0.287	13.2337	0.3251	13.2333	0.15845	13.2335	0.35995	13.2337	-0.2658	13.2337	0.15485
13.2418	0.1427	13.242	0.19715	13.2417	0.28675	13.242	0.32495	13.2417	0.1581	13.2418	0.36025	13.242	-0.2719	13.242	0.15455
13.2502	0.14025	13.2503	0.19535	13.25	0.2851	13.2503	0.3228	13.25	0.15805	13.2502	0.3598	13.2503	-0.28045	13.2503	0.15365
13.2585	0.1403	13.2587	0.1932	13.2583	0.2851	13.2587	0.322	13.2583	0.1566	13.2585	0.36	13.2587	-0.28235	13.2587	0.1518
13.2668	0.13945	13.267	0.1915	13.2667	0.28355	13.267	0.3222	13.2667	0.15535	13.2668	0.3588	13.267	-0.2846	13.267	0.15195
13.2752	0.1382	13.2753	0.1899	13.275	0.2817	13.2753	0.321	13.275	0.15335	13.2752	0.35815	13.2753	-0.2833	13.2753	0.1512
13.2835	0.1374	13.2837	0.1875	13.2833	0.27925	13.2837	0.32005	13.2833	0.15295	13.2835	0.3582	13.2837	-0.2838	13.2837	0.14975
13.2918	0.14	13.292	0.1872	13.2917	0.27975	13.292	0.3178	13.2917	0.1527	13.2918	0.361	13.292	-0.27975	13.292	0.149
13.3002	0.1391	13.3003	0.1851	13.3	0.27915	13.3003	0.3156	13.3	0.1504	13.3002	0.36165	13.3003	-0.27335	13.3003	0.14865
13.3085	0.1381	13.3087	0.18335	13.3083	0.27845	13.3087	0.31445	13.3083	0.148	13.3085	0.36235	13.3087	-0.26435	13.3087	0.1469
13.3168	0.1384	13.317	0.1817	13.3167	0.27955	13.317	0.31265	13.3167	0.1475	13.3168	0.36575	13.317	-0.2533	13.317	0.1476
13.3252	0.13915	13.3253	0.18165	13.325	0.28	13.3253	0.31125	13.325	0.14595	13.3252	0.369	13.3253	-0.23815	13.3253	0.14715
13.3335	0.1382	13.3337	0.17915	13.3333	0.2795	13.3337	0.31	13.3333	0.1428	13.3335	0.3709	13.3337	-0.2233	13.3337	0.14585
13.3418	0.13725	13.342	0.17895	13.3417	0.27985	13.342	0.30755	13.3417	0.1414	13.3418	0.3732	13.342	-0.20795	13.342	0.1451
13.3502	0.13605	13.3503	0.17685	13.35	0.27845	13.3503	0.30545	13.35	0.138	13.3502	0.3769	13.3503	-0.19255	13.3503	0.1424
13.3585	0.138	13.3587	0.17735	13.3583	0.28055	13.3587	0.30555	13.3583	0.1374	13.3585	0.3827	13.3587	-0.17455	13.3587	0.14235
13.3668	0.1386	13.367	0.1764	13.3667	0.2831	13.367	0.3045	13.3667	0.13775	13.3668	0.3875	13.367	-0.1545	13.367	0.1427
13.3752	0.1368	13.3753	0.1763	13.375	0.2828	13.3753	0.3013	13.375	0.1357	13.3752	0.3921	13.3753	-0.1354	13.3753	0.1408
13.3835	0.13815	13.3837	0.1755	13.3833	0.2863	13.3837	0.30095	13.3833	0.1338	13.3835	0.3977	13.3837	-0.11805	13.3837	0.14305
13.3918	0.13765	13.392	0.17525	13.3917	0.2875	13.392	0.29975	13.3917	0.13355	13.3918	0.40445	13.392	-0.0993	13.392	0.1419
13.4002	0.13715	13.4003	0.17335	13.4	0.2899	13.4003	0.2986	13.4	0.13125	13.4002	0.40995	13.4003	-0.08695	13.4003	0.14125
13.4085	0.13705	13.4087	0.1737	13.4083	0.2941	13.4087	0.2973	13.4083	0.13045	13.4085	0.41705	13.4087	-0.0719	13.4087	0.1409
13.4168	0.13695	13.417	0.1737	13.4167	0.2963	13.417	0.2964	13.4167	0.12885	13.4168	0.42305	13.417	-0.05915	13.417	0.13975
13.4252	0.1373	13.4253	0.17325	13.425	0.30195	13.4253	0.29715	13.425	0.12895	13.4252	0.43145	13.4253	-0.04855	13.4253	0.1404
13.4335	0.1363	13.4337	0.17475	13.4333	0.3065	13.4337	0.29605	13.4333	0.12785	13.4335	0.4389	13.4337	-0.04135	13.4337	0.14105
13.4418	0.1384	13.442	0.1738	13.4417	0.31015	13.442	0.29605	13.4417	0.1287	13.4418	0.44805	13.442	-0.03605	13.442	0.1421
13.4502	0.13775	13.4503	0.1738	13.45	0.31685	13.4503	0.29525	13.45	0.12435	13.4502	0.45395	13.4503	-0.03325	13.4503	0.141
13.4585	0.13965	13.4587	0.176	13.4583	0.3243	13.4587	0.2979	13.4583	0.12565	13.4585	0.46515	13.4587	-0.03195	13.4587	0.144
13.4668	0.14015	13.467	0.17595	13.4667	0.32985	13.467	0.29605	13.4667	0.12425	13.4668	0.4714	13.467	-0.0314	13.467	0.1442
13.4752	0.14165	13.4753	0.17875	13.475	0.3369	13.4753	0.29945	13.475	0.12585	13.4752	0.4801	13.4753	-0.03455	13.4753	0.14725
13.4835	0.1443	13.4837	0.17935	13.4833	0.34475	13.4837	0.30205	13.4833	0.12665	13.4835	0.4894	13.4837	-0.0327	13.4837	0.1495
13.4918	0.14675	13.492	0.18295	13.4917	0.35335	13.492	0.3046	13.4917	0.1291	13.4918	0.49885	13.492	-0.03755	13.492	0.1523
13.5002	0.1484	13.5003	0.1841	13.5	0.3613	13.5003	0.3077	13.5	0.12875	13.5002	0.50565	13.5003	-0.04125	13.5003	0.15345
13.5085	0.15175	13.5087	0.1864	13.5083	0.3698	13.5087	0.31055	13.5083	0.1308	13.5085	0.51365	13.5087	-0.04595	13.5087	0.1584
13.5168	0.15575	13.517	0.1895	13.5167	0.37885	13.517	0.3128	13.5167	0.1313	13.5168	0.52105	13.517	-0.05045	13.517	0.16195
13.5252	0.15785	13.5253	0.19245	13.525	0.38735	13.5253	0.31715	13.525	0.13225	13.5252	0.5279	13.5253	-0.0619	13.5253	0.1659
13.5335	0.1607	13.5337	0.1963	13.5333	0.3953	13.5337	0.32095	13.5333	0.13525	13.5335	0.5355	13.5337	-0.0628	13.5337	0.16965
13.5418	0.16545	13.542	0.20195	13.5417	0.4054	13.542	0.3272	13.5417	0.1386	13.5418	0.54275	13.542	-0.06855	13.542	0.17575
13.5502	0.1717	13.5503	0.2073	13.55	0.41395	13.5503	0.3329	13.55	0.14205	13.5502	0.5488	13.5503	-0.07215	13.5503	0.1814
13.5585	0.17565	13.5587	0.21395	13.5583	0.42355	13.5587	0.33895	13.5583	0.1449	13.5585	0.5544	13.5587	-0.0785	13.5587	0.1881
13.5668	0.18465	13.567	0.22175	13.5667	0.4356	13.567	0.3456	13.5667	0.15005	13.5668	0.56115	13.567	-0.0824	13.567	0.19555
13.5752	0.1898	13.5753	0.2287	13.575	0.44415	13.5753	0.3524	13.575	0.15365	13.5752	0.5664	13.5753	-0.0869	13.5753	0.20425
13.5835	0.19525	13.5837	0.2365	13.5833	0.4512	13.5837	0.359	13.5833	0.1585	13.5835	0.56945	13.5837	-0.08865	13.5837	0.21095
13.5918	0.20265	13.592	0.2436	13.5917	0.46085	13.592	0.3677	13.5917	0.1636	13.5918	0.5738	13.592	-0.09085	13.592	0.21775
13.6002	0.21175	13.6003	0.25325	13.6	0.4685	13.6003	0.3752	13.6	0.16995	13.6002	0.5799	13.6003	-0.0949	13.6003	0.2276
13.6085	0.2208	13.6087	0.26215	13.6083	0.47595	13.6087	0.3847	13.6083	0.176	13.6085	0.5828	13.6087	-0.09735	13.6087	0.2371
13.6168	0.2278	13.617	0.27085	13.6167	0.48445	13.617	0.3909	13.6167	0.1829	13.6168	0.5858	13.617	-0.09665	13.617	0.24555
13.6252	0.2374	13.6253	0.2821	13.625	0.49005	13.6253	0.3995	13.625	0.1901	13.6252	0.589	13.6253	-0.0989	13.6253	0.25405
13.6335	0.24475	13.6337	0.29125	13.6333	0.4968	13.6337	0.4087	13.6333	0.19635	13.6335	0.59095	13.6337	-0.10125	13.6337	0.26455
13.6418	0.25315	13.642	0.29935	13.6417	0.50335	13.642	0.41705	13.6417	0.20325	13.6418	0.59135	13.642	-0.10065	13.642	0.27225
13.6502	0.2625	13.6503	0.3109	13.65	0.50875	13.6503	0.4263	13.65	0.2124	13.6502	0.5959	13.6503	-0.10005	13.6503	0.28055
13.6585	0.2721	13.6587	0.3214	13.6583	0.51415	13.6587	0.43565	13.6583	0.2208	13.6585	0.5982	13.6587	-0.09745	13.6587	0.2917
13.6668	0.2828	13.667	0.33015	13.6667	0.5174	13.667	0.4436	13.6667	0.22875	13.6668	0.59785	13.667	-0.09335	13.667	0.29915
13.6752	0.291	13.6753	0.34045	13.675	0.522	13.6753	0.4519	13.675	0.2383	13.6752	0.601	13.6753	-0.09155	13.6753	0.30855
13.6835	0.30035	13.6837	0.34835	13.6833	0.52505	13.6837	0.45935	13.6833	0.24635	13.6835	0.6025	13.6837	-0.0932	13.6837	0.3169
13.6918	0.3105	13.692	0.35755	13.6917	0.52965	13.692	0.4687	13.6917	0.25525	13.6918	0.6044	13.692	-0.08955	13.692	0.3253
13.7002	0.3184	13.7003	0.36605	13.7	0.53145	13.7003	0.4757	13.7	0.2635	13.7002	0.6037	13.7003	-0.08065	13.7003	0.33385
13.7085	0.32675	13.7087	0.372	13.7083	0.53355	13.7087	0.48245	13.7083	0.27055	13.7085	0.6039	13.7087	-0.0767	13.7087	0.33875
13.7168	0.33525	13.717	0.3777	13.7167	0.5364	13.717	0.4898	13.7167	0.27885	13.7168	0.6035	13.717	-0.07415	13.717	0.3456
13.7252	0.34235	13.7253	0.384	13.725	0.5388	13.7253	0.49775	13.725	0.28655	13.7252	0.6042	13.7253	-0.06815	13.7253	0.3519
13.7335	0.34945	13.7337	0.39	13.7333	0.5398	13.7337	0.50245	13.7333	0.2932	13.7335	0.60285	13.7337	-0.0637	13.7337	0.35665
13.7418	0.35655	13.742	0.39375	13.7417	0.54305	13.742	0.51055	13.7417	0.303	13.7418	0.6032	13.742	-0.05955	13.742	0.36295
13.7502	0.364	13.7503	0.39675	13.75	0.543	13.7503	0.51545	13.75	0.30845	13.7502	0.6016	13.7503	-0.0547	13.7503	0.3666
13.7585	0.3702	13.7587	0.4002	13.7583	0.54395	13.7587	0.52095	13.7583	0.3154	13.7585	0.60125	13.7587	-0.05045	13.7587	0.37095
13.7668	0.37535	13.767	0.40055	13.7667	0.5441	13.767	0.5241	13.7667	0.3201	13.7668	0.5952	13.767	-0.04595	13.767	0.37365
13.7752	0.3791	13.7753	0.4031	13.775	0.54595	13.7753	0.52875	13.775	0.32695	13.7752	0.59365	13.7753	-0.04395	13.7753	0.3763
13.7835	0.38335	13.7837	0.4043	13.7833	0.5465	13.7837	0.53415	13.7833	0.3316	13.7835	0.58975	13.7837	-0.04045	13.7837	0.37985
13.7918	0.38845	13.792	0.4033	13.7917	0.5454	13.792	0.5393	13.7917	0.33695	13.7918	0.5864	13.792	-0.04065	13.792	0.3814
13.8002	0.391	13.8003	0.4021	13.8	0.54415	13.8003	0.54085	13.8	0.34115	13.8002	0.5807	13.8003	-0.0414	13.8003	0.38235
13.8085	0.3949	13.8087	0.40145	13.8083	0.54315	13.8087	0.54515	13.8083	0.34545	13.8085	0.57515	13.8087	-0.04335	13.8087	0.3845
13.8168	0.3976	13.817	0.3966	13.8167	0.53995	13.817	0.54765	13.8167	0.3476	13.8168	0.56805	13.817	-0.04695	13.817	0.38225
13.8252	0.4014	13.8253	0.3922	13.825	0.53955	13.8253	0.55065	13.825	0.3507	13.8252	0.55985	13.8253	-0.05025	13.8253	0.38365
13.8335	0.40295	13.8337	0.3865	13.8333	0.5367	13.8337	0.5528	13.8333	0.3558	13.8335	0.5537	13.8337	-0.0562	13.8337	0.3838
13.8418	0.40445	13.842	0.37955	13.8417	0.53165	13.842	0.5538	13.8417	0.3543	13.8418	0.5424	13.842	-0.0665	13.842	0.3814
13.8502	0.40745	13.8503	0.3723	13.85	0.5289	13.8503	0.5571	13.85	0.3586	13.8502	0.53275	13.8503	-0.0729	13.8503	0.38035
13.8585	0.4113	13.8587	0.366	13.8583	0.5247	13.8587	0.5587	13.8583	0.36125	13.8585	0.52495	13.8587	-0.08355	13.8587	0.37985
13.8668	0.4116	13.867	0.3577	13.8667	0.5183	13.867	0.55955	13.8667	0.36195	13.8668	0.51365	13.867	-0.0971	13.867	0.37675
13.8752	0.41145	13.8753	0.34715	13.875	0.51105	13.8753	0.55815	13.875	0.3614	13.8752	0.50015	13.8753	-0.11195	13.8753	0.37105
13.8835	0.4138	13.8837	0.3365	13.8833	0.50325	13.8837	0.558	13.8833	0.3618	13.8835	0.49045	13.8837	-0.1264	13.8837	0.3664
13.8918	0.4142	13.892	0.32615	13.8917	0.49505	13.892	0.5579	13.8917	0.36125	13.8918	0.4794	13.892	-0.14235	13.892	0.36185
13.9002	0.4137	13.9003	0.3147	13.9	0.48495	13.9003	0.5556	13.9	0.35985	13.9002	0.4673	13.9003	-0.1592	13.9003	0.3555
13.9085	0.41235	13.9087	0.304	13.9083	0.47655	13.9087	0.5519	13.9083	0.35905	13.9085	0.45535	13.9087	-0.1763	13.9087	0.3484
13.9168	0.4137	13.917	0.2922	13.9167	0.4663	13.917	0.5503	13.9167	0.35735	13.9168	0.44405	13.917	-0.19475	13.917	0.34
13.9252	0.4148	13.9253	0.28335	13.925	0.45525	13.9253	0.54865	13.925	0.3556	13.9252	0.4338	13.9253	-0.21095	13.9253	0.332
13.9335	0.41515	13.9337	0.27075	13.9333	0.4433	13.9337	0.5433	13.9333	0.35295	13.9335	0.42385	13.9337	-0.22635	13.9337	0.3229
13.9418	0.41215	13.942	0.2581	13.9417	0.4288	13.942	0.5364	13.9417	0.3479	13.9418	0.41385	13.942	-0.2449	13.942	0.3129
13.9502	0.4093	13.9503	0.24885	13.95	0.4158	13.9503	0.53	13.95	0.34225	13.9502	0.40475	13.9503	-0.26155	13.9503	0.3025
13.9585	0.40765	13.9587	0.23815	13.9583	0.40515	13.9587	0.5239	13.9583	0.337	13.9585	0.39745	13.9587	-0.27405	13.9587	0.29245
13.9668	0.4041	13.967	0.2282	13.9667	0.3912	13.967	0.51485	13.9667	0.32985	13.9668	0.38995	13.967	-0.2892	13.967	0.2777
13.9752	0.4026	13.9753	0.2194	13.975	0.3792	13.9753	0.50765	13.975	0.3243	13.9752	0.3845	13.9753	-0.30305	13.9753	0.26775
13.9835	0.3982	13.9837	0.2118	13.9833	0.3674	13.9837	0.49725	13.9833	0.3148	13.9835	0.3784	13.9837	-0.31675	13.9837	0.25505
13.9918	0.3938	13.992	0.2046	13.9917	0.3564	13.992	0.48585	13.9917	0.3073	13.9918	0.37445	13.992	-0.3297	13.992	0.2455
14.0002	0.38755	14.0003	0.1972	14	0.34595	14.0003	0.47395	14	0.29815	14.0002	0.3692	14.0003	-0.34295	14.0003	0.2336
14.0085	0.38215	14.0087	0.18955	14.0083	0.33445	14.0087	0.46225	14.0083	0.2861	14.0085	0.366	14.0087	-0.3511	14.0087	0.2235
14.0168	0.3761	14.017	0.18535	14.0167	0.32705	14.017	0.45005	14.0167	0.27685	14.0168	0.36375	14.017	-0.36015	14.017	0.2136
14.0252	0.3661	14.0253	0.1799	14.025	0.31865	14.0253	0.43605	14.025	0.2647	14.0252	0.3627	14.0253	-0.3697	14.0253	0.2043
14.0335	0.35715	14.0337	0.17655	14.0333	0.3106	14.0337	0.42435	14.0333	0.25475	14.0335	0.3608	14.0337	-0.38015	14.0337	0.1938
14.0418	0.34945	14.042	0.17035	14.0417	0.30375	14.042	0.41065	14.0417	0.24305	14.0418	0.3609	14.042	-0.3877	14.042	0.1857
14.0502	0.3385	14.0503	0.16765	14.05	0.2978	14.0503	0.3989	14.05	0.23225	14.0502	0.3618	14.0503	-0.3917	14.0503	0.1772
14.0585	0.32935	14.0587	0.164	14.0583	0.2924	14.0587	0.3854	14.0583	0.22125	14.0585	0.36405	14.0587	-0.3974	14.0587	0.17025
14.0668	0.31515	14.067	0.15955	14.0667	0.2872	14.067	0.3729	14.0667	0.20805	14.0668	0.36315	14.067	-0.4064	14.067	0.16195
14.0752	0.306	14.0753	0.15965	14.075	0.28505	14.0753	0.36395	14.075	0.1991	14.0752	0.36805	14.0753	-0.4111	14.0753	0.1584
14.0835	0.29295	14.0837	0.1554	14.0833	0.28095	14.0837	0.3499	14.0833	0.1871	14.0835	0.36845	14.0837	-0.4146	14.0837	0.1504
14.0918	0.28015	14.092	0.15345	14.0917	0.278	14.092	0.3389	14.0917	0.17755	14.0918	0.37075	14.092	-0.41975	14.092	0.1463
14.1002	0.2679	14.1003	0.1527	14.1	0.27755	14.1003	0.32975	14.1	0.169	14.1002	0.37455	14.1003	-0.42435	14.1003	0.1426
14.1085	0.25665	14.1087	0.151	14.1083	0.27765	14.1087	0.32325	14.1083	0.1592	14.1085	0.3774	14.1087	-0.427	14.1087	0.14125
14.1168	0.24705	14.117	0.1513	14.1167	0.2801	14.117	0.31565	14.1167	0.15265	14.1168	0.38175	14.117	-0.43185	14.117	0.1395
14.1252	0.2341	14.1253	0.14975	14.125	0.28045	14.1253	0.3075	14.125	0.14495	14.1252	0.3841	14.1253	-0.4335	14.1253	0.1359
14.1335	0.2228	14.1337	0.14775	14.1333	0.28045	14.1337	0.3	14.1333	0.13805	14.1335	0.38545	14.1337	-0.4354	14.1337	0.1333
14.1418	0.21375	14.142	0.1461	14.1417	0.28305	14.142	0.29575	14.1417	0.1335	14.1418	0.3913	14.142	-0.4362	14.142	0.1331
14.1502	0.2047	14.1503	0.1463	14.15	0.28585	14.1503	0.2894	14.15	0.12805	14.1502	0.39355	14.1503	-0.43675	14.1503	0.13235
14.1585	0.1944	14.1587	0.14535	14.1583	0.28775	14.1587	0.28445	14.1583	0.12355	14.1585	0.39655	14.1587	-0.43975	14.1587	0.1318
14.1668	0.18695	14.167	0.1444	14.1667	0.2909	14.167	0.28185	14.1667	0.1195	14.1668	0.4005	14.167	-0.4432	14.167	0.1337
14.1752	0.17805	14.1753	0.14385	14.175	0.294	14.1753	0.2799	14.175	0.1157	14.1752	0.40315	14.1753	-0.44445	14.1753	0.13285
14.1835	0.17225	14.1837	0.144	14.1833	0.2986	14.1837	0.2778	14.1833	0.11485	14.1835	0.40695	14.1837	-0.44595	14.1837	0.135
14.1918	0.1656	14.192	0.14325	14.1917	0.3022	14.192	0.2767	14.1917	0.1131	14.1918	0.4081	14.192	-0.4463	14.192	0.13625
14.2002	0.1594	14.2003	0.14275	14.2	0.30615	14.2003	0.27595	14.2	0.1094	14.2002	0.4117	14.2003	-0.44915	14.2003	0.1376
14.2085	0.1559	14.2087	0.14485	14.2083	0.31225	14.2087	0.2788	14.2083	0.1104	14.2085	0.41695	14.2087	-0.4475	14.2087	0.1422
14.2168	0.1491	14.217	0.14365	14.2167	0.31455	14.217	0.2769	14.2167	0.1083	14.2168	0.4197	14.217	-0.45115	14.217	0.14475
14.2252	0.14575	14.2253	0.1431	14.225	0.31755	14.2253	0.2799	14.225	0.10885	14.2252	0.4256	14.2253	-0.4508	14.2253	0.1492
14.2335	0.14165	14.2337	0.1443	14.2333	0.3215	14.2337	0.28325	14.2333	0.10945	14.2335	0.4311	14.2337	-0.4513	14.2337	0.1538
14.2418	0.1397	14.242	0.1452	14.2417	0.3252	14.242	0.28495	14.2417	0.11035	14.2418	0.43835	14.242	-0.45145	14.242	0.15695
14.2502	0.1366	14.2503	0.1424	14.25	0.32755	14.2503	0.2865	14.25	0.11125	14.2502	0.44775	14.2503	-0.45195	14.2503	0.1602
14.2585	0.1332	14.2587	0.1455	14.2583	0.3309	14.2587	0.2907	14.2583	0.1115	14.2585	0.45655	14.2587	-0.45485	14.2587	0.16745
14.2668	0.13185	14.267	0.1446	14.2667	0.3358	14.267	0.2952	14.2667	0.1157	14.2668	0.46975	14.267	-0.4565	14.267	0.17165
14.2752	0.12765	14.2753	0.14675	14.275	0.33945	14.2753	0.29695	14.275	0.1169	14.2752	0.4817	14.2753	-0.45675	14.2753	0.17675
14.2835	0.12615	14.2837	0.14645	14.2833	0.3431	14.2837	0.30205	14.2833	0.11835	14.2835	0.49635	14.2837	-0.4564	14.2837	0.18115
14.2918	0.12575	14.292	0.1495	14.2917	0.35175	14.292	0.3066	14.2917	0.12195	14.2918	0.5157	14.292	-0.45785	14.292	0.1888
14.3002	0.1242	14.3003	0.15	14.3	0.35845	14.3003	0.31015	14.3	0.12655	14.3002	0.5335	14.3003	-0.45915	14.3003	0.19255
14.3085	0.12325	14.3087	0.1502	14.3083	0.36705	14.3087	0.3148	14.3083	0.129	14.3085	0.553	14.3087	-0.45775	14.3087	0.1946
14.3168	0.12125	14.317	0.154	14.3167	0.37915	14.317	0.3156	14.3167	0.1339	14.3168	0.57375	14.317	-0.46155	14.317	0.20055
14.3252	0.1192	14.3253	0.1543	14.325	0.3903	14.3253	0.3201	14.325	0.1361	14.3252	0.59225	14.3253	-0.46355	14.3253	0.2051
14.3335	0.1194	14.3337	0.15775	14.3333	0.40645	14.3337	0.32395	14.3333	0.13935	14.3335	0.6138	14.3337	-0.4671	14.3337	0.20925
14.3418	0.11665	14.342	0.1589	14.3417	0.4208	14.342	0.324	14.3417	0.14255	14.3418	0.6316	14.342	-0.47395	14.342	0.2103
14.3502	0.11595	14.3503	0.16415	14.35	0.4432	14.3503	0.32935	14.35	0.14695	14.3502	0.65425	14.3503	-0.44195	14.3503	0.2172
14.3585	0.117	14.3587	0.16925	14.3583	0.4645	14.3587	0.33145	14.3583	0.1512	14.3585	0.6727	14.3587	-0.45535	14.3587	0.22165
14.3668	0.1161	14.367	0.17215	14.3667	0.48895	14.367	0.33525	14.3667	0.1546	14.3668	0.68935	14.367	-0.46185	14.367	0.22805
14.3752	0.11445	14.3753	0.17875	14.375	0.51465	14.3753	0.3375	14.375	0.15785	14.3752	0.7088	14.3753	-0.4605	14.3753	0.23135
14.3835	0.1159	14.3837	0.1863	14.3833	0.54215	14.3837	0.3414	14.3833	0.1622	14.3835	0.7218	14.3837	-0.4728	14.3837	0.2397
14.3918	0.11355	14.392	0.193	14.3917	0.5663	14.392	0.34255	14.3917	0.1644	14.3918	0.73295	14.392	-0.46875	14.392	0.245
14.4002	0.11065	14.4003	0.2013	14.4	0.5938	14.4003	0.34745	14.4	0.169	14.4002	0.7457	14.4003	-0.4561	14.4003	0.25235
14.4085	0.1116	14.4087	0.21245	14.4083	0.62205	14.4087	0.35285	14.4083	0.17495	14.4085	0.75805	14.4087	-0.4634	14.4087	0.26255
14.4168	0.1123	14.417	0.22315	14.4167	0.64985	14.417	0.35885	14.4167	0.1802	14.4168	0.76735	14.417	-0.46325	14.417	0.2757
14.4252	0.11335	14.4253	0.23775	14.425	0.6776	14.4253	0.3679	14.425	0.1918	14.4252	0.7796	14.4253	-0.46675	14.4253	0.29055
14.4335	0.1106	14.4337	0.25015	14.4333	0.7009	14.4337	0.37355	14.4333	0.1975	14.4335	0.78545	14.4337	-0.465	14.4337	0.3043
14.4418	0.1116	14.442	0.265	14.4417	0.72415	14.442	0.3828	14.4417	0.2068	14.4418	0.7932	14.442	-0.46435	14.442	0.31955
14.4502	0.11	14.4503	0.28235	14.45	0.74625	14.4503	0.3917	14.45	0.21775	14.4502	0.7995	14.4503	-0.46405	14.4503	0.33925
14.4585	0.11155	14.4587	0.30065	14.4583	0.7656	14.4587	0.40205	14.4583	0.23235	14.4585	0.8066	14.4587	-0.464	14.4587	0.35925
14.4668	0.1089	14.467	0.32095	14.4667	0.7829	14.467	0.41375	14.4667	0.2471	14.4668	0.8108	14.467	-0.4659	14.467	0.3769
14.4752	0.10935	14.4753	0.34585	14.475	0.79855	14.4753	0.42715	14.475	0.26655	14.4752	0.81745	14.4753	-0.46425	14.4753	0.39855
14.4835	0.1089	14.4837	0.37625	14.4833	0.81265	14.4837	0.43945	14.4833	0.2859	14.4835	0.82435	14.4837	-0.4661	14.4837	0.41825
14.4918	0.10905	14.492	0.4105	14.4917	0.8276	14.492	0.4542	14.4917	0.309	14.4918	0.8295	14.492	-0.46225	14.492	0.4405
14.5002	0.1077	14.5003	0.45285	14.5	0.83915	14.5003	0.4653	14.5	0.33405	14.5002	0.83635	14.5003	-0.46205	14.5003	0.4601
14.5085	0.1086	14.5087	0.50665	14.5083	0.85175	14.5087	0.48095	14.5083	0.3603	14.5085	0.8448	14.5087	-0.4594	14.5087	0.481
14.5168	0.10685	14.517	0.56695	14.5167	0.8623	14.517	0.493	14.5167	0.38975	14.5168	0.8505	14.517	-0.4635	14.517	0.4976
14.5252	0.10745	14.5253	0.6394	14.525	0.87505	14.5253	0.50695	14.525	0.41795	14.5252	0.85695	14.5253	-0.45895	14.5253	0.51615
14.5335	0.1066	14.5337	0.7199	14.5333	0.88495	14.5337	0.51935	14.5333	0.44695	14.5335	0.8633	14.5337	-0.45205	14.5337	0.53305
14.5418	0.10525	14.542	0.8084	14.5417	0.8964	14.542	0.5305	14.5417	0.47365	14.5418	0.8669	14.542	-0.4485	14.542	0.54685
14.5502	0.1068	14.5503	0.90215	14.55	0.90885	14.5503	0.54265	14.55	0.50235	14.5502	0.872	14.5503	-0.44285	14.5503	0.5626
14.5585	0.10485	14.5587	0.9968	14.5583	0.923	14.5587	0.55245	14.5583	0.52825	14.5585	0.87505	14.5587	-0.4366	14.5587	0.57875
14.5668	0.1096	14.567	1.0912	14.5667	0.93745	14.567	0.56415	14.5667	0.55675	14.5668	0.8802	14.567	-0.4284	14.567	0.59425
14.5752	0.10715	14.5753	1.17555	14.575	0.9483	14.5753	0.5702	14.575	0.57815	14.5752	0.87685	14.5753	-0.41365	14.5753	0.60605
14.5835	0.1067	14.5837	1.2532	14.5833	0.96115	14.5837	0.5778	14.5833	0.59995	14.5835	0.87555	14.5837	-0.40295	14.5837	0.61735
14.5918	0.1061	14.592	1.31885	14.5917	0.97	14.592	0.58305	14.5917	0.61915	14.5918	0.86945	14.592	-0.38855	14.592	0.62955
14.6002	0.10625	14.6003	1.37095	14.6	0.9817	14.6003	0.58985	14.6	0.6397	14.6002	0.86335	14.6003	-0.3673	14.6003	0.64035
14.6085	0.1087	14.6087	1.4132	14.6083	0.9928	14.6087	0.5983	14.6083	0.6595	14.6085	0.85635	14.6087	-0.3479	14.6087	0.65515
14.6168	0.10685	14.617	1.43995	14.6167	1.00185	14.617	0.6064	14.6167	0.67715	14.6168	0.8463	14.617	-0.3201	14.617	0.66815
14.6252	0.1067	14.6253	1.45275	14.625	1.007	14.6253	0.6129	14.625	0.69375	14.6252	0.8336	14.6253	-0.29235	14.6253	0.678
14.6335	0.10755	14.6337	1.4522	14.6333	1.00935	14.6337	0.6199	14.6333	0.70985	14.6335	0.8177	14.6337	-0.26565	14.6337	0.6886
14.6418	0.10535	14.642	1.43945	14.6417	1.00755	14.642	0.6258	14.6417	0.72285	14.6418	0.79945	14.642	-0.2359	14.642	0.69865
14.6502	0.10645	14.6503	1.41845	14.65	1.0072	14.6503	0.6379	14.65	0.73895	14.6502	0.7822	14.6503	-0.1986	14.6503	0.7077
14.6585	0.10505	14.6587	1.38835	14.6583	0.99965	14.6587	0.6465	14.6583	0.753	14.6585	0.7616	14.6587	-0.17145	14.6587	0.71185
14.6668	0.1071	14.667	1.3504	14.6667	0.992	14.667	0.65635	14.6667	0.7688	14.6668	0.7427	14.667	-0.13565	14.667	0.71815
14.6752	0.10845	14.6753	1.307	14.675	0.9787	14.6753	0.66975	14.675	0.7818	14.6752	0.72135	14.6753	-0.0917	14.6753	0.723
14.6835	0.1072	14.6837	1.25895	14.6833	0.9625	14.6837	0.6787	14.6833	0.79485	14.6835	0.69995	14.6837	-0.06245	14.6837	0.7223
14.6918	0.1048	14.692	1.2083	14.6917	0.94315	14.692	0.69095	14.6917	0.80585	14.6918	0.67715	14.692	-0.0297	14.692	0.7196
14.7002	0.1058	14.7003	1.154	14.7	0.92315	14.7003	0.7017	14.7	0.81565	14.7002	0.65515	14.7003	0.0024	14.7003	0.7159
14.7085	0.10655	14.7087	1.0994	14.7083	0.8994	14.7087	0.71165	14.7083	0.82185	14.7085	0.63255	14.7087	0.0285	14.7087	0.70645
14.7168	0.1045	14.717	1.0436	14.7167	0.87395	14.717	0.721	14.7167	0.8264	14.7168	0.60895	14.717	0.0544	14.717	0.69625
14.7252	0.1043	14.7253	0.988	14.725	0.84575	14.7253	0.72815	14.725	0.82945	14.7252	0.5892	14.7253	0.0744	14.7253	0.68315
14.7335	0.1048	14.7337	0.9335	14.7333	0.81655	14.7337	0.7325	14.7333	0.82885	14.7335	0.5688	14.7337	0.1079	14.7337	0.66665
14.7418	0.1061	14.742	0.8806	14.7417	0.78775	14.742	0.736	14.7417	0.8262	14.7418	0.54875	14.742	0.0958	14.742	0.6491
14.7502	0.1039	14.7503	0.82945	14.75	0.7559	14.7503	0.73605	14.75	0.81885	14.7502	0.53115	14.7503	0.1093	14.7503	0.62925
14.7585	0.10545	14.7587	0.7781	14.7583	0.7253	14.7587	0.73445	14.7583	0.8087	14.7585	0.5125	14.7587	0.0917	14.7587	0.60685
14.7668	0.10545	14.767	0.73225	14.7667	0.6969	14.767	0.73105	14.7667	0.79685	14.7668	0.49715	14.767	0.09245	14.767	0.5853
14.7752	0.1053	14.7753	0.6871	14.775	0.6667	14.7753	0.72425	14.775	0.7795	14.7752	0.4816	14.7753	0.0852	14.7753	0.5613
14.7835	0.1034	14.7837	0.6419	14.7833	0.63525	14.7837	0.713	14.7833	0.75975	14.7835	0.46495	14.7837	0.0778	14.7837	0.5365
14.7918	0.1033	14.792	0.6018	14.7917	0.6069	14.792	0.7017	14.7917	0.7373	14.7918	0.4515	14.792	0.0661	14.792	0.51175
14.8002	0.10455	14.8003	0.56515	14.8	0.58055	14.8003	0.6866	14.8	0.71455	14.8002	0.43885	14.8003	0.05375	14.8003	0.48815
14.8085	0.1035	14.8087	0.5307	14.8083	0.55375	14.8087	0.67125	14.8083	0.6892	14.8085	0.4286	14.8087	0.0394	14.8087	0.4654
14.8168	0.1046	14.817	0.49475	14.8167	0.52795	14.817	0.65205	14.8167	0.661	14.8168	0.41775	14.817	0.0205	14.817	0.4389
14.8252	0.1034	14.8253	0.4653	14.825	0.5058	14.8253	0.63385	14.825	0.63345	14.8252	0.4092	14.8253	0.0034	14.8253	0.41785
14.8335	0.1047	14.8337	0.4386	14.8333	0.48305	14.8337	0.61445	14.8333	0.60415	14.8335	0.4	14.8337	-0.0152	14.8337	0.3945
14.8418	0.10385	14.842	0.41375	14.8417	0.46165	14.842	0.5924	14.8417	0.57335	14.8418	0.39115	14.842	-0.03085	14.842	0.3715
14.8502	0.104	14.8503	0.3902	14.85	0.4439	14.8503	0.5734	14.85	0.54345	14.8502	0.38565	14.8503	-0.04745	14.8503	0.3518
14.8585	0.10325	14.8587	0.36945	14.8583	0.42585	14.8587	0.5517	14.8583	0.5131	14.8585	0.3784	14.8587	-0.06765	14.8587	0.3318
14.8668	0.1024	14.867	0.34825	14.8667	0.40835	14.867	0.53065	14.8667	0.4828	14.8668	0.3732	14.867	-0.08405	14.867	0.3128
14.8752	0.103	14.8753	0.33115	14.875	0.39345	14.8753	0.51045	14.875	0.4547	14.8752	0.3678	14.8753	-0.10045	14.8753	0.2971
14.8835	0.1023	14.8837	0.3149	14.8833	0.3798	14.8837	0.49105	14.8833	0.42735	14.8835	0.36365	14.8837	-0.1116	14.8837	0.2826
14.8918	0.10195	14.892	0.29925	14.8917	0.36735	14.892	0.47065	14.8917	0.4006	14.8918	0.3576	14.892	-0.13105	14.892	0.2674
14.9002	0.10225	14.9003	0.288	14.9	0.35655	14.9003	0.45385	14.9	0.37585	14.9002	0.35455	14.9003	-0.1424	14.9003	0.25515
14.9085	0.10275	14.9087	0.27625	14.9083	0.34775	14.9087	0.438	14.9083	0.35305	14.9085	0.35215	14.9087	-0.1514	14.9087	0.2431
14.9168	0.10125	14.917	0.26385	14.9167	0.33605	14.917	0.41895	14.9167	0.3293	14.9168	0.3459	14.917	-0.15845	14.917	0.2309
14.9252	0.10025	14.9253	0.25475	14.925	0.32905	14.9253	0.4045	14.925	0.3081	14.9252	0.343	14.9253	-0.1749	14.9253	0.22065
14.9335	0.10125	14.9337	0.2443	14.9333	0.32095	14.9337	0.3904	14.9333	0.29055	14.9335	0.3403	14.9337	-0.1848	14.9337	0.2113
14.9418	0.1024	14.942	0.2375	14.9417	0.3154	14.942	0.37735	14.9417	0.27435	14.9418	0.33875	14.942	-0.19355	14.942	0.2038
14.9502	0.1021	14.9503	0.22805	14.95	0.30945	14.9503	0.36565	14.95	0.25675	14.9502	0.3377	14.9503	-0.1997	14.9503	0.1961
14.9585	0.10145	14.9587	0.22145	14.9583	0.3032	14.9587	0.35315	14.9583	0.2399	14.9585	0.33285	14.9587	-0.20325	14.9587	0.1884
14.9668	0.1012	14.967	0.21435	14.9667	0.29765	14.967	0.3435	14.9667	0.2278	14.9668	0.33205	14.967	-0.20925	14.967	0.18155
14.9752	0.1015	14.9753	0.20725	14.975	0.2947	14.9753	0.3352	14.975	0.2136	14.9752	0.32945	14.9753	-0.2173	14.9753	0.17675
14.9835	0.1023	14.9837	0.2042	14.9833	0.2912	14.9837	0.32655	14.9833	0.20405	14.9835	0.32805	14.9837	-0.2089	14.9837	0.17285
14.9918	0.10095	14.992	0.19955	14.9917	0.2853	14.992	0.3183	14.9917	0.19415	14.9918	0.32845	14.992	-0.20405	14.992	0.16855
15.0002	0.1014	15.0003	0.19565	15	0.2838	15.0003	0.3123	15	0.18575	15.0002	0.3262	15.0003	-0.21355	15.0003	0.1655
15.0085	0.10085	15.0087	0.19155	15.0083	0.28115	15.0087	0.3063	15.0083	0.177	15.0085	0.325	15.0087	-0.22645	15.0087	0.1631
15.0168	0.1013	15.017	0.1874	15.0167	0.27775	15.017	0.29945	15.0167	0.16825	15.0168	0.32315	15.017	-0.20075	15.017	0.1593
15.0252	0.099	15.0253	0.1817	15.025	0.2727	15.0253	0.29125	15.025	0.1601	15.0252	0.3187	15.0253	-0.19825	15.0253	0.1544
15.0335	0.09835	15.0337	0.17875	15.0333	0.2713	15.0337	0.2887	15.0333	0.15505	15.0335	0.3192	15.0337	-0.20195	15.0337	0.15265
15.0418	0.0999	15.042	0.1775	15.0417	0.27	15.042	0.28495	15.0417	0.15065	15.0418	0.3192	15.042	-0.18935	15.042	0.1507
15.0502	0.09935	15.0503	0.17175	15.05	0.2689	15.0503	0.28225	15.05	0.14465	15.0502	0.31805	15.0503	-0.1954	15.0503	0.15015
15.0585	0.0982	15.0587	0.1705	15.0583	0.2654	15.0587	0.27855	15.0583	0.14065	15.0585	0.31655	15.0587	-0.16805	15.0587	0.14825
15.0668	0.0993	15.067	0.16835	15.0667	0.2645	15.067	0.2742	15.0667	0.1374	15.0668	0.3153	15.067	-0.1569	15.067	0.14695
15.0752	0.0998	15.0753	0.1653	15.075	0.26135	15.0753	0.2722	15.075	0.1346	15.0752	0.31595	15.0753	-0.1477	15.0753	0.1465
15.0835	0.0996	15.0837	0.16445	15.0833	0.26075	15.0837	0.26955	15.0833	0.1314	15.0835	0.31415	15.0837	-0.1318	15.0837	0.1447
15.0918	0.0976	15.092	0.1611	15.0917	0.2588	15.092	0.2665	15.0917	0.12785	15.0918	0.31205	15.092	-0.1115	15.092	0.1421
15.1002	0.09775	15.1003	0.15715	15.1	0.2566	15.1003	0.26325	15.1	0.1238	15.1002	0.31115	15.1003	-0.09525	15.1003	0.1422
15.1085	0.09585	15.1087	0.1546	15.1083	0.2535	15.1087	0.2603	15.1083	0.12145	15.1085	0.30865	15.1087	-0.06745	15.1087	0.1409
15.1168	0.0965	15.117	0.15485	15.1167	0.2542	15.117	0.2588	15.1167	0.11905	15.1168	0.3082	15.117	-0.03685	15.117	0.1401
15.1252	0.0952	15.1253	0.15285	15.125	0.25275	15.1253	0.25805	15.125	0.1168	15.1252	0.30835	15.1253	-0.0068	15.1253	0.1395
15.1335	0.09495	15.1337	0.1514	15.1333	0.25215	15.1337	0.2552	15.1333	0.11475	15.1335	0.30665	15.1337	0.02855	15.1337	0.13905
15.1418	0.09575	15.142	0.149	15.1417	0.2508	15.142	0.2547	15.1417	0.1128	15.1418	0.30575	15.142	0.06965	15.142	0.13975
15.1502	0.0953	15.1503	0.1463	15.15	0.2484	15.1503	0.25265	15.15	0.1112	15.1502	0.30485	15.1503	0.11635	15.1503	0.13765
15.1585	0.09375	15.1587	0.14565	15.1583	0.24795	15.1587	0.25275	15.1583	0.1092	15.1585	0.30465	15.1587	0.1673	15.1587	0.13775
15.1668	0.09275	15.167	0.14445	15.1667	0.2469	15.167	0.25175	15.1667	0.1075	15.1668	0.3028	15.167	0.22165	15.167	0.1386
15.1752	0.09425	15.1753	0.14515	15.175	0.24725	15.1753	0.25075	15.175	0.1073	15.1752	0.3022	15.1753	0.28225	15.1753	0.137
15.1835	0.09305	15.1837	0.14245	15.1833	0.243	15.1837	0.24935	15.1833	0.105	15.1835	0.30085	15.1837	0.34745	15.1837	0.13605
15.1918	0.09475	15.192	0.1425	15.1917	0.24595	15.192	0.2525	15.1917	0.10345	15.1918	0.3022	15.192	0.41525	15.192	0.13905
15.2002	0.0918	15.2003	0.13825	15.2	0.24235	15.2003	0.2493	15.2	0.1015	15.2002	0.2988	15.2003	0.487	15.2003	0.13615
15.2085	0.09395	15.2087	0.1379	15.2083	0.24215	15.2087	0.24935	15.2083	0.10135	15.2085	0.29855	15.2087	0.56035	15.2087	0.1367
15.2168	0.09105	15.217	0.13655	15.2167	0.239	15.217	0.24845	15.2167	0.098	15.2168	0.2967	15.217	0.63315	15.217	0.1342
15.2252	0.0923	15.2253	0.13485	15.225	0.24015	15.2253	0.24795	15.225	0.0962	15.2252	0.2969	15.2253	0.7068	15.2253	0.1355
15.2335	0.09265	15.2337	0.1337	15.2333	0.2381	15.2337	0.2499	15.2333	0.09585	15.2335	0.2955	15.2337	0.78155	15.2337	0.13565
15.2418	0.0928	15.242	0.1343	15.2417	0.2374	15.242	0.252	15.2417	0.0948	15.2418	0.29615	15.242	0.8544	15.242	0.1366
15.2502	0.09045	15.2503	0.1316	15.25	0.23525	15.2503	0.24995	15.25	0.09195	15.2502	0.2925	15.2503	0.921	15.2503	0.13225
15.2585	0.09225	15.2587	0.13255	15.2583	0.2369	15.2587	0.2519	15.2583	0.09265	15.2585	0.29285	15.2587	0.98115	15.2587	0.13405
15.2668	0.09065	15.267	0.1295	15.2667	0.23365	15.267	0.2531	15.2667	0.0898	15.2668	0.28935	15.267	1.03365	15.267	0.13295
15.2752	0.08955	15.2753	0.1287	15.275	0.23425	15.2753	0.25385	15.275	0.08795	15.2752	0.28955	15.2753	1.0799	15.2753	0.13245
15.2835	0.08925	15.2837	0.12755	15.2833	0.23315	15.2837	0.2556	15.2833	0.08835	15.2835	0.28865	15.2837	1.12045	15.2837	0.13155
15.2918	0.0899	15.292	0.1263	15.2917	0.2315	15.292	0.25825	15.2917	0.0865	15.2918	0.2889	15.292	1.1499	15.292	0.1314
15.3002	0.08765	15.3003	0.12455	15.3	0.2299	15.3003	0.2589	15.3	0.08415	15.3002	0.2883	15.3003	1.16955	15.3003	0.12925
15.3085	0.0891	15.3087	0.12655	15.3083	0.23035	15.3087	0.2605	15.3083	0.08325	15.3085	0.2864	15.3087	1.1763	15.3087	0.1296
15.3168	0.08795	15.317	0.12295	15.3167	0.22605	15.317	0.2597	15.3167	0.08045	15.3168	0.28505	15.317	1.17075	15.317	0.12825
15.3252	0.08965	15.3253	0.12395	15.325	0.2275	15.3253	0.26195	15.325	0.0797	15.3252	0.28505	15.3253	1.1584	15.3253	0.1288
15.3335	0.08805	15.3337	0.1217	15.3333	0.22685	15.3337	0.2632	15.3333	0.0784	15.3335	0.28225	15.3337	1.134	15.3337	0.1264
15.3418	0.0874	15.342	0.121	15.3417	0.2245	15.342	0.2625	15.3417	0.07835	15.3418	0.28115	15.342	1.0975	15.342	0.12275
15.3502	0.0854	15.3503	0.1196	15.35	0.22365	15.3503	0.2639	15.35	0.07475	15.3502	0.2796	15.3503	1.05335	15.3503	0.121
15.3585	0.08695	15.3587	0.12185	15.3583	0.22575	15.3587	0.2669	15.3583	0.0763	15.3585	0.2808	15.3587	1.00025	15.3587	0.1223
15.3668	0.0863	15.367	0.1202	15.3667	0.22355	15.367	0.26575	15.3667	0.0742	15.3668	0.27985	15.367	0.9431	15.367	0.1214
15.3752	0.08485	15.3753	0.1179	15.375	0.2219	15.3753	0.2645	15.375	0.0736	15.3752	0.27825	15.3753	0.87275	15.3753	0.11865
15.3835	0.0856	15.3837	0.11865	15.3833	0.22145	15.3837	0.26505	15.3833	0.071	15.3835	0.2775	15.3837	0.80315	15.3837	0.11625
15.3918	0.0841	15.392	0.11645	15.3917	0.22035	15.392	0.26405	15.3917	0.0678	15.3918	0.2766	15.392	0.72845	15.392	0.1163
15.4002	0.08375	15.4003	0.11635	15.4	0.22055	15.4003	0.2646	15.4	0.067	15.4002	0.27705	15.4003	0.65305	15.4003	0.1156
15.4085	0.08385	15.4087	0.1163	15.4083	0.2186	15.4087	0.2637	15.4083	0.0654	15.4085	0.27685	15.4087	0.5747	15.4087	0.1121
15.4168	0.0836	15.417	0.1138	15.4167	0.21615	15.417	0.2629	15.4167	0.0649	15.4168	0.2748	15.417	0.49455	15.417	0.1114
15.4252	0.08295	15.4253	0.11495	15.425	0.2173	15.4253	0.26325	15.425	0.06465	15.4252	0.2756	15.4253	0.41665	15.4253	0.111
15.4335	0.0825	15.4337	0.11225	15.4333	0.21555	15.4337	0.2603	15.4333	0.0612	15.4335	0.2744	15.4337	0.343	15.4337	0.1091
15.4418	0.0822	15.442	0.11115	15.4417	0.21305	15.442	0.25725	15.4417	0.05805	15.4418	0.27355	15.442	0.26945	15.442	0.1064
15.4502	0.08055	15.4503	0.11035	15.45	0.21275	15.4503	0.25745	15.45	0.05675	15.4502	0.27315	15.4503	0.2005	15.4503	0.10605
15.4585	0.08005	15.4587	0.11145	15.4583	0.21175	15.4587	0.2563	15.4583	0.0553	15.4585	0.27255	15.4587	0.1377	15.4587	0.10095
15.4668	0.0795	15.467	0.1079	15.4667	0.2105	15.467	0.255	15.4667	0.05555	15.4668	0.2718	15.467	0.07935	15.467	0.1005
15.4752	0.0784	15.4753	0.10625	15.475	0.2089	15.4753	0.2547	15.475	0.05295	15.4752	0.27015	15.4753	0.02105	15.4753	0.0987
15.4835	0.07905	15.4837	0.10895	15.4833	0.2091	15.4837	0.25325	15.4833	0.05365	15.4835	0.2728	15.4837	-0.02845	15.4837	0.09875
15.4918	0.07775	15.492	0.1074	15.4917	0.20675	15.492	0.25175	15.4917	0.05125	15.4918	0.27055	15.492	-0.0776	15.492	0.0962
15.5002	0.07785	15.5003	0.10635	15.5	0.20595	15.5003	0.24815	15.5	0.0509	15.5002	0.2717	15.5003	-0.11515	15.5003	0.0946
15.5085	0.0771	15.5087	0.1059	15.5083	0.20525	15.5087	0.2472	15.5083	0.0492	15.5085	0.2716	15.5087	-0.15555	15.5087	0.09305
15.5168	0.07725	15.517	0.1054	15.5167	0.20495	15.517	0.2459	15.5167	0.04625	15.5168	0.27145	15.517	-0.1879	15.517	0.092
15.5252	0.07525	15.5253	0.10355	15.525	0.20355	15.5253	0.24265	15.525	0.04545	15.5252	0.2704	15.5253	-0.21575	15.5253	0.08965
15.5335	0.0776	15.5337	0.1044	15.5333	0.20265	15.5337	0.2427	15.5333	0.04585	15.5335	0.27185	15.5337	-0.24415	15.5337	0.09065
15.5418	0.0753	15.542	0.1035	15.5417	0.20145	15.542	0.241	15.5417	0.046	15.5418	0.2729	15.542	-0.26555	15.542	0.09
15.5502	0.07615	15.5503	0.10305	15.55	0.20015	15.5503	0.2393	15.55	0.0459	15.5502	0.27265	15.5503	-0.28425	15.5503	0.08815
15.5585	0.0754	15.5587	0.10335	15.5583	0.1998	15.5587	0.2364	15.5583	0.0446	15.5585	0.27385	15.5587	-0.30005	15.5587	0.0863
15.5668	0.07495	15.567	0.10065	15.5667	0.19885	15.567	0.23315	15.5667	0.0448	15.5668	0.27415	15.567	-0.31475	15.567	0.08395
15.5752	0.0754	15.5753	0.10135	15.575	0.1978	15.5753	0.23405	15.575	0.04415	15.5752	0.27445	15.5753	-0.3248	15.5753	0.08275
15.5835	0.0749	15.5837	0.1007	15.5833	0.19795	15.5837	0.2326	15.5833	0.04535	15.5835	0.2773	15.5837	-0.3392	15.5837	0.08295
15.5918	0.0738	15.592	0.09895	15.5917	0.19715	15.592	0.22845	15.5917	0.0419	15.5918	0.2763	15.592	-0.3482	15.592	0.08085
15.6002	0.0725	15.6003	0.09905	15.6	0.19635	15.6003	0.2281	15.6	0.04245	15.6002	0.27855	15.6003	-0.35595	15.6003	0.0806
15.6085	0.0744	15.6087	0.10035	15.6083	0.197	15.6087	0.2282	15.6083	0.04305	15.6085	0.2821	15.6087	-0.3616	15.6087	0.08
15.6168	0.0717	15.617	0.09745	15.6167	0.1956	15.617	0.22525	15.6167	0.042	15.6168	0.2809	15.617	-0.3703	15.617	0.0781
15.6252	0.0725	15.6253	0.098	15.625	0.1953	15.6253	0.2233	15.625	0.0426	15.6252	0.2843	15.6253	-0.3742	15.6253	0.0777
15.6335	0.07155	15.6337	0.09525	15.6333	0.19325	15.6337	0.22165	15.6333	0.0414	15.6335	0.28735	15.6337	-0.3836	15.6337	0.07615
15.6418	0.07355	15.642	0.09535	15.6417	0.19435	15.642	0.2195	15.6417	0.0403	15.6418	0.2923	15.642	-0.3886	15.642	0.07415
15.6502	0.0733	15.6503	0.0946	15.65	0.19445	15.6503	0.21925	15.65	0.04165	15.6502	0.29735	15.6503	-0.3892	15.6503	0.0744
15.6585	0.0701	15.6587	0.09205	15.6583	0.19545	15.6587	0.21535	15.6583	0.0393	15.6585	0.3007	15.6587	-0.395	15.6587	0.0722
15.6668	0.07	15.667	0.0909	15.6667	0.1956	15.667	0.21485	15.6667	0.03885	15.6668	0.3074	15.667	-0.39605	15.667	0.07035
15.6752	0.0717	15.6753	0.09165	15.675	0.1988	15.6753	0.2159	15.675	0.03955	15.6752	0.317	15.6753	-0.3975	15.6753	0.07085
15.6835	0.07315	15.6837	0.0924	15.6833	0.20195	15.6837	0.2144	15.6833	0.03785	15.6835	0.327	15.6837	-0.4013	15.6837	0.0708
15.6918	0.07145	15.692	0.0907	15.6917	0.20175	15.692	0.2127	15.6917	0.03725	15.6918	0.3378	15.692	-0.40315	15.692	0.069
15.7002	0.07185	15.7003	0.09045	15.7	0.2082	15.7003	0.2138	15.7	0.0381	15.7002	0.35055	15.7003	-0.40395	15.7003	0.0697
15.7085	0.0715	15.7087	0.09005	15.7083	0.21145	15.7087	0.2133	15.7083	0.03755	15.7085	0.3656	15.7087	-0.4057	15.7087	0.0678
15.7168	0.07145	15.717	0.08875	15.7167	0.2198	15.717	0.21355	15.7167	0.0362	15.7168	0.3811	15.717	-0.40725	15.717	0.06765
15.7252	0.0703	15.7253	0.0868	15.725	0.22625	15.7253	0.21325	15.725	0.03575	15.7252	0.3975	15.7253	-0.4112	15.7253	0.06715
15.7335	0.0691	15.7337	0.0866	15.7333	0.23595	15.7337	0.21395	15.7333	0.0344	15.7335	0.41525	15.7337	-0.40965	15.7337	0.066
15.7418	0.0691	15.742	0.08525	15.7417	0.2481	15.742	0.21525	15.7417	0.0339	15.7418	0.43345	15.742	-0.41205	15.742	0.0641
15.7502	0.0682	15.7503	0.08455	15.75	0.2626	15.7503	0.214	15.75	0.03315	15.7502	0.4512	15.7503	-0.416	15.7503	0.06435
15.7585	0.0677	15.7587	0.08455	15.7583	0.27935	15.7587	0.21655	15.7583	0.0319	15.7585	0.4693	15.7587	-0.41535	15.7587	0.0632
15.7668	0.06755	15.767	0.08325	15.7667	0.30085	15.767	0.21845	15.7667	0.0305	15.7668	0.4871	15.767	-0.4164	15.767	0.0659
15.7752	0.0676	15.7753	0.0814	15.775	0.3236	15.7753	0.2205	15.775	0.0291	15.7752	0.5025	15.7753	-0.4203	15.7753	0.06565
15.7835	0.0677	15.7837	0.0826	15.7833	0.34895	15.7837	0.22515	15.7833	0.02975	15.7835	0.51915	15.7837	-0.4184	15.7837	0.06585
15.7918	0.06695	15.792	0.0814	15.7917	0.37445	15.792	0.22955	15.7917	0.0296	15.7918	0.536	15.792	-0.4206	15.792	0.06785
15.8002	0.06855	15.8003	0.0821	15.8	0.4025	15.8003	0.23745	15.8	0.03105	15.8002	0.54895	15.8003	-0.41985	15.8003	0.072
15.8085	0.06695	15.8087	0.0807	15.8083	0.4315	15.8087	0.24465	15.8083	0.0309	15.8085	0.5601	15.8087	-0.4199	15.8087	0.07495
15.8168	0.06645	15.817	0.0802	15.8167	0.459	15.817	0.25285	15.8167	0.0327	15.8168	0.57025	15.817	-0.42065	15.817	0.0821
15.8252	0.0656	15.8253	0.0807	15.825	0.48805	15.8253	0.26365	15.825	0.03265	15.8252	0.57945	15.8253	-0.4223	15.8253	0.0879
15.8335	0.06615	15.8337	0.07965	15.8333	0.51405	15.8337	0.2754	15.8333	0.0344	15.8335	0.58735	15.8337	-0.4223	15.8337	0.09655
15.8418	0.0668	15.842	0.08015	15.8417	0.5417	15.842	0.2933	15.8417	0.03835	15.8418	0.5941	15.842	-0.4195	15.842	0.1086
15.8502	0.0655	15.8503	0.0798	15.85	0.56495	15.8503	0.31175	15.85	0.0417	15.8502	0.59965	15.8503	-0.41745	15.8503	0.1223
15.8585	0.0661	15.8587	0.081	15.8583	0.58645	15.8587	0.33235	15.8583	0.04865	15.8585	0.6038	15.8587	-0.4158	15.8587	0.1376
15.8668	0.06555	15.867	0.0831	15.8667	0.60765	15.867	0.35735	15.8667	0.05755	15.8668	0.60905	15.867	-0.41395	15.867	0.1583
15.8752	0.0662	15.8753	0.0855	15.875	0.62515	15.8753	0.38675	15.875	0.06995	15.8752	0.61495	15.8753	-0.4111	15.8753	0.1794
15.8835	0.0665	15.8837	0.08645	15.8833	0.63865	15.8837	0.41715	15.8833	0.08215	15.8835	0.6189	15.8837	-0.40915	15.8837	0.202
15.8918	0.0667	15.892	0.0895	15.8917	0.65205	15.892	0.44965	15.8917	0.1001	15.8918	0.6235	15.892	-0.408	15.892	0.22925
15.9002	0.0645	15.9003	0.0917	15.9	0.6608	15.9003	0.48165	15.9	0.11825	15.9002	0.6246	15.9003	-0.4031	15.9003	0.25375
15.9085	0.06515	15.9087	0.09445	15.9083	0.6699	15.9087	0.5187	15.9083	0.1402	15.9085	0.63025	15.9087	-0.4011	15.9087	0.28125
15.9168	0.0654	15.917	0.1009	15.9167	0.6775	15.917	0.55535	15.9167	0.16795	15.9168	0.6357	15.917	-0.39735	15.917	0.31095
15.9252	0.0656	15.9253	0.1043	15.925	0.6816	15.9253	0.5884	15.925	0.1948	15.9252	0.63975	15.9253	-0.39405	15.9253	0.33895
15.9335	0.0655	15.9337	0.1111	15.9333	0.68625	15.9337	0.62175	15.9333	0.22585	15.9335	0.6449	15.9337	-0.396	15.9337	0.3654
15.9418	0.0646	15.942	0.11405	15.9417	0.6879	15.942	0.65215	15.9417	0.2574	15.9418	0.6533	15.942	-0.39135	15.942	0.3905
15.9502	0.06635	15.9503	0.1202	15.95	0.69215	15.9503	0.6815	15.95	0.29025	15.9502	0.66385	15.9503	-0.3922	15.9503	0.4159
15.9585	0.0663	15.9587	0.127	15.9583	0.69425	15.9587	0.70675	15.9583	0.32195	15.9585	0.6758	15.9587	-0.38915	15.9587	0.43865
15.9668	0.06585	15.967	0.13295	15.9667	0.69675	15.967	0.72885	15.9667	0.35815	15.9668	0.69005	15.967	-0.387	15.967	0.45735
15.9752	0.06535	15.9753	0.1378	15.975	0.70015	15.9753	0.74665	15.975	0.3892	15.9752	0.7077	15.9753	-0.38395	15.9753	0.47485
15.9835	0.0665	15.9837	0.1456	15.9833	0.704	15.9837	0.7626	15.9833	0.42055	15.9835	0.7304	15.9837	-0.38525	15.9837	0.4933
15.9918	0.0663	15.992	0.1521	15.9917	0.70805	15.992	0.7749	15.9917	0.4472	15.9918	0.7548	15.992	-0.3858	15.992	0.5066
16.0002	0.06515	16.0003	0.15945	16	0.7124	16.0003	0.78325	16	0.4697	16.0002	0.7847	16.0003	-0.38505	16.0003	0.5182
16.0085	0.06535	16.0087	0.16825	16.0083	0.7214	16.0087	0.79055	16.0083	0.4938	16.0085	0.82105	16.0087	-0.38415	16.0087	0.53025
16.0168	0.0653	16.017	0.1776	16.0167	0.72905	16.017	0.795	16.0167	0.51095	16.0168	0.86055	16.017	-0.3837	16.017	0.5374
16.0252	0.0657	16.0253	0.1882	16.025	0.74115	16.0253	0.79795	16.025	0.5282	16.0252	0.9065	16.0253	-0.3879	16.0253	0.54695
16.0335	0.06725	16.0337	0.19985	16.0333	0.75315	16.0337	0.801	16.0333	0.5433	16.0335	0.95885	16.0337	-0.38715	16.0337	0.5559
16.0418	0.06645	16.042	0.2133	16.0417	0.76785	16.042	0.8	16.0417	0.55435	16.0418	1.01525	16.042	-0.3818	16.042	0.56515
16.0502	0.06555	16.0503	0.2277	16.05	0.78645	16.0503	0.80055	16.05	0.56265	16.0502	1.0744	16.0503	-0.38585	16.0503	0.57185
16.0585	0.0649	16.0587	0.2428	16.0583	0.80475	16.0587	0.79925	16.0583	0.5693	16.0585	1.1367	16.0587	-0.3863	16.0587	0.57785
16.0668	0.0666	16.067	0.26385	16.0667	0.82805	16.067	0.7977	16.0667	0.5751	16.0668	1.2055	16.067	-0.3879	16.067	0.58635
16.0752	0.0679	16.0753	0.28725	16.075	0.85675	16.0753	0.80015	16.075	0.58125	16.0752	1.27745	16.0753	-0.38815	16.0753	0.5964
16.0835	0.06845	16.0837	0.31285	16.0833	0.8879	16.0837	0.8001	16.0833	0.58665	16.0835	1.3483	16.0837	-0.38705	16.0837	0.60445
16.0918	0.0696	16.092	0.343	16.0917	0.92035	16.092	0.8023	16.0917	0.59085	16.0918	1.42015	16.092	-0.38725	16.092	0.61235
16.1002	0.07215	16.1003	0.3781	16.1	0.9605	16.1003	0.80525	16.1	0.59545	16.1002	1.49235	16.1003	-0.3869	16.1003	0.6252
16.1085	0.0742	16.1087	0.41515	16.1083	1.00415	16.1087	0.81015	16.1083	0.60075	16.1085	1.56175	16.1087	-0.3862	16.1087	0.63635
16.1168	0.0773	16.117	0.45705	16.1167	1.05335	16.117	0.8178	16.1167	0.6076	16.1168	1.63095	16.117	-0.3876	16.117	0.6524
16.1252	0.08125	16.1253	0.50155	16.125	1.1051	16.1253	0.8243	16.125	0.61295	16.1252	1.6952	16.1253	-0.3856	16.1253	0.67285
16.1335	0.08655	16.1337	0.55075	16.1333	1.16575	16.1337	0.8341	16.1333	0.6203	16.1335	1.75315	16.1337	-0.37185	16.1337	0.6966
16.1418	0.09175	16.142	0.6022	16.1417	1.22835	16.142	0.84755	16.1417	0.62935	16.1418	1.8066	16.142	-0.3836	16.142	0.72535
16.1502	0.09925	16.1503	0.6539	16.15	1.29245	16.1503	0.8603	16.15	0.63835	16.1502	1.8505	16.1503	-0.39415	16.1503	0.75745
16.1585	0.1072	16.1587	0.70805	16.1583	1.35955	16.1587	0.87505	16.1583	0.6496	16.1585	1.8885	16.1587	-0.37535	16.1587	0.79555
16.1668	0.12015	16.167	0.76235	16.1667	1.4284	16.167	0.8732	16.1667	0.66155	16.1668	1.9164	16.167	-0.38135	16.167	0.8392
16.1752	0.1349	16.1753	0.81735	16.175	1.49955	16.1753	0.91445	16.175	0.67535	16.1752	1.93785	16.1753	-0.3783	16.1753	0.8915
16.1835	0.1513	16.1837	0.86995	16.1833	1.56805	16.1837	0.93655	16.1833	0.69075	16.1835	1.95005	16.1837	-0.3754	16.1837	0.9438
16.1918	0.1716	16.192	0.91975	16.1917	1.63475	16.192	0.9597	16.1917	0.70645	16.1918	1.9538	16.192	-0.37295	16.192	1.0036
16.2002	0.1959	16.2003	0.96465	16.2	1.6987	16.2003	0.98765	16.2	0.72555	16.2002	1.94585	16.2003	-0.3716	16.2003	1.06535
16.2085	0.2234	16.2087	1.0038	16.2083	1.7576	16.2087	1.0199	16.2083	0.74785	16.2085	1.92945	16.2087	-0.3643	16.2087	1.1282
16.2168	0.2544	16.217	1.03715	16.2167	1.8101	16.217	1.0563	16.2167	0.77535	16.2168	1.9033	16.217	-0.36225	16.217	1.1929
16.2252	0.29205	16.2253	1.06385	16.225	1.85655	16.2253	1.09775	16.225	0.806	16.2252	1.869	16.2253	-0.3592	16.2253	1.25845
16.2335	0.3333	16.2337	1.08395	16.2333	1.897	16.2337	1.1455	16.2333	0.84395	16.2335	1.8279	16.2337	-0.35255	16.2337	1.32205
16.2418	0.37855	16.242	1.09635	16.2417	1.92725	16.242	1.1952	16.2417	0.8857	16.2418	1.7782	16.242	-0.348	16.242	1.3822
16.2502	0.42955	16.2503	1.09925	16.25	1.94905	16.2503	1.2495	16.25	0.9317	16.2502	1.7228	16.2503	-0.3455	16.2503	1.4383
16.2585	0.48415	16.2587	1.09415	16.2583	1.96375	16.2587	1.30695	16.2583	0.98365	16.2585	1.6629	16.2587	-0.341	16.2587	1.4906
16.2668	0.5433	16.267	1.0806	16.2667	1.96755	16.267	1.3671	16.2667	1.03895	16.2668	1.5977	16.267	-0.3337	16.267	1.536
16.2752	0.6074	16.2753	1.0611	16.275	1.9643	16.2753	1.42815	16.275	1.0999	16.2752	1.5296	16.2753	-0.33025	16.2753	1.57185
16.2835	0.67205	16.2837	1.03275	16.2833	1.947	16.2837	1.488	16.2833	1.16045	16.2835	1.45725	16.2837	-0.3234	16.2837	1.60005
16.2918	0.74015	16.292	1.0002	16.2917	1.9265	16.292	1.5507	16.2917	1.22565	16.2918	1.38765	16.292	-0.3199	16.292	1.62225
16.3002	0.8092	16.3003	0.9636	16.3	1.89165	16.3003	1.6081	16.3	1.2882	16.3002	1.31555	16.3003	-0.3145	16.3003	1.6343
16.3085	0.87735	16.3087	0.92145	16.3083	1.8522	16.3087	1.65995	16.3083	1.34905	16.3085	1.2431	16.3087	-0.3085	16.3087	1.63485
16.3168	0.9441	16.317	0.8741	16.3167	1.8027	16.317	1.70405	16.3167	1.40435	16.3168	1.1734	16.317	-0.305	16.317	1.62465
16.3252	1.0099	16.3253	0.825	16.325	1.7476	16.3253	1.74255	16.325	1.45705	16.3252	1.10525	16.3253	-0.3012	16.3253	1.60745
16.3335	1.071	16.3337	0.7715	16.3333	1.68385	16.3337	1.77335	16.3333	1.5022	16.3335	1.0368	16.3337	-0.29575	16.3337	1.5799
16.3418	1.1324	16.342	0.72375	16.3417	1.6198	16.342	1.79825	16.3417	1.5426	16.3418	0.9751	16.342	-0.29065	16.342	1.54635
16.3502	1.18515	16.3503	0.6685	16.35	1.5491	16.3503	1.80915	16.35	1.57485	16.3502	0.9142	16.3503	-0.28945	16.3503	1.50095
16.3585	1.2339	16.3587	0.619	16.3583	1.47675	16.3587	1.81215	16.3583	1.597	16.3585	0.8585	16.3587	-0.2868	16.3587	1.4511
16.3668	1.27445	16.367	0.5684	16.3667	1.4018	16.367	1.80485	16.3667	1.6081	16.3668	0.8041	16.367	-0.2829	16.367	1.3952
16.3752	1.31135	16.3753	0.52245	16.375	1.3264	16.3753	1.78865	16.375	1.61025	16.3752	0.7578	16.3753	-0.28045	16.3753	1.336
16.3835	1.338	16.3837	0.4772	16.3833	1.25215	16.3837	1.76255	16.3833	1.60405	16.3835	0.7117	16.3837	-0.2753	16.3837	1.27175
16.3918	1.3592	16.392	0.4358	16.3917	1.1777	16.392	1.7267	16.3917	1.5873	16.3918	0.6715	16.392	-0.27575	16.392	1.20625
16.4002	1.3701	16.4003	0.3973	16.4	1.1064	16.4003	1.6827	16.4	1.56085	16.4002	0.63375	16.4003	-0.2756	16.4003	1.13795
16.4085	1.3727	16.4087	0.36375	16.4083	1.0371	16.4087	1.63345	16.4083	1.5271	16.4085	0.6012	16.4087	-0.2737	16.4087	1.071
16.4168	1.36835	16.417	0.33095	16.4167	0.9714	16.417	1.57595	16.4167	1.48385	16.4168	0.57145	16.417	-0.27275	16.417	1.0055
16.4252	1.35295	16.4253	0.30015	16.425	0.9082	16.4253	1.51535	16.425	1.43295	16.4252	0.54305	16.4253	-0.27085	16.4253	0.9382
16.4335	1.3304	16.4337	0.2736	16.4333	0.8478	16.4337	1.44735	16.4333	1.376	16.4335	0.5175	16.4337	-0.26825	16.4337	0.87235
16.4418	1.3011	16.442	0.2506	16.4417	0.79385	16.442	1.3793	16.4417	1.3165	16.4418	0.4971	16.442	-0.26845	16.442	0.81205
16.4502	1.26705	16.4503	0.2307	16.45	0.7437	16.4503	1.30855	16.45	1.2534	16.4502	0.47965	16.4503	-0.2695	16.4503	0.7541
16.4585	1.22115	16.4587	0.21095	16.4583	0.6944	16.4587	1.235	16.4583	1.18395	16.4585	0.46115	16.4587	-0.2721	16.4587	0.69785
16.4668	1.17455	16.467	0.19625	16.4667	0.65305	16.467	1.1633	16.4667	1.1158	16.4668	0.4461	16.467	-0.26935	16.467	0.64655
16.4752	1.12205	16.4753	0.18255	16.475	0.6155	16.4753	1.0943	16.475	1.04845	16.4752	0.43335	16.4753	-0.2711	16.4753	0.6002
16.4835	1.06595	16.4837	0.16965	16.4833	0.5787	16.4837	1.02545	16.4833	0.97935	16.4835	0.42005	16.4837	-0.27215	16.4837	0.5546
16.4918	1.00615	16.492	0.15905	16.4917	0.5473	16.492	0.96275	16.4917	0.91555	16.4918	0.41095	16.492	-0.27125	16.492	0.51425
16.5002	0.94465	16.5003	0.1505	16.5	0.5184	16.5003	0.8979	16.5	0.85115	16.5002	0.40105	16.5003	-0.2711	16.5003	0.47735
16.5085	0.88445	16.5087	0.1446	16.5083	0.4932	16.5087	0.8391	16.5083	0.79025	16.5085	0.3937	16.5087	-0.27325	16.5087	0.4431
16.5168	0.8208	16.517	0.1354	16.5167	0.46975	16.517	0.7841	16.5167	0.73145	16.5168	0.3849	16.517	-0.2742	16.517	0.4103
16.5252	0.76025	16.5253	0.1278	16.525	0.44855	16.5253	0.7315	16.525	0.67595	16.5252	0.3769	16.5253	-0.27595	16.5253	0.38105
16.5335	0.69975	16.5337	0.12155	16.5333	0.4296	16.5337	0.6843	16.5333	0.6238	16.5335	0.3701	16.5337	-0.27505	16.5337	0.3543
16.5418	0.64405	16.542	0.1182	16.5417	0.4164	16.542	0.6426	16.5417	0.5777	16.5418	0.368	16.542	-0.27935	16.542	0.33365
16.5502	0.5883	16.5503	0.1141	16.55	0.3997	16.5503	0.6034	16.55	0.53335	16.5502	0.36105	16.5503	-0.2791	16.5503	0.3086
16.5585	0.53545	16.5587	0.111	16.5583	0.38685	16.5587	0.56725	16.5583	0.49265	16.5585	0.35645	16.5587	-0.28015	16.5587	0.291
16.5668	0.48665	16.567	0.10725	16.5667	0.377	16.567	0.53545	16.5667	0.45805	16.5668	0.3522	16.567	-0.2831	16.567	0.2742
16.5752	0.43995	16.5753	0.104	16.575	0.3642	16.5753	0.50395	16.575	0.42075	16.5752	0.34675	16.5753	-0.28235	16.5753	0.25725
16.5835	0.4005	16.5837	0.10175	16.5833	0.3553	16.5837	0.47755	16.5833	0.3901	16.5835	0.3418	16.5837	-0.2816	16.5837	0.244
16.5918	0.3621	16.592	0.0983	16.5917	0.34725	16.592	0.45525	16.5917	0.3618	16.5918	0.3383	16.592	-0.2825	16.592	0.23165
16.6002	0.32955	16.6003	0.0964	16.6	0.3404	16.6003	0.43465	16.6	0.33725	16.6002	0.3364	16.6003	-0.28575	16.6003	0.22055
16.6085	0.2976	16.6087	0.09195	16.6083	0.3319	16.6087	0.416	16.6083	0.3122	16.6085	0.33135	16.6087	-0.28425	16.6087	0.21025
16.6168	0.27155	16.617	0.08985	16.6167	0.3259	16.617	0.39975	16.6167	0.2913	16.6168	0.32895	16.617	-0.284	16.617	0.20045
16.6252	0.2473	16.6253	0.088	16.625	0.32	16.6253	0.3842	16.625	0.272	16.6252	0.3246	16.6253	-0.2819	16.6253	0.19245
16.6335	0.2273	16.6337	0.0875	16.6333	0.31555	16.6337	0.37325	16.6333	0.25475	16.6335	0.32325	16.6337	-0.28205	16.6337	0.1876
[truncated: 4,604 more rows]
