# Supplementary material for: A moonlighting function of a chitin polysaccharide monooxygenase, CWR-1, in Neurospora crassa allorecognition
Source: eLife. 2022 Aug 30;11:e80459. doi: 10.7554/eLife.80459 (PMC9550227; doi:10.7554/eLife.80459)
Supplement: Figure 4—source data 3. — The amount of bound copper that was calculated for each construct. The amount of copper was determined using ICP-MS and then divided by the protein concentration to generate a ratio. The protein concentration was determined using the absorbance at 280 nm with a NanoDrop UV-Vis with extinction coefficients predicted by Benchling (all Cys oxidized). The results from the technical triplicates are listed. [file elife-80459-fig4-data3.xlsx]

## Sheet: Sheet1
	Copper Equivalents (Cu µM/Protein µM)
	Haplogroup
	HG1	0.65	0.71	0.72
	HG2	1.22	1.3	1.39
	HG3	1.16	1.1	1.21
	HG4	1.32	1.19	1.22
	HG5	1.55	1.5	1.37
	HG6	1.3	1.22	1.3
