# Supplementary material for: A moonlighting function of a chitin polysaccharide monooxygenase, CWR-1, in Neurospora crassa allorecognition
Source: eLife. 2022 Aug 30;11:e80459. doi: 10.7554/eLife.80459 (PMC9550227; doi:10.7554/eLife.80459)
Supplement: Figure 4—source data 5. — Blank subtracted HPAEC-PAD traces. The samples were prepared as described in ‘Materials and methods.’ The time and nC response are listed in the table. [file elife-80459-fig4-data5.xlsx]

## Sheet: Sheet1
Figure 4E Source Data (FGSC2489 CW)
FGSC2489 CW		FGSC2489 CW + Asc.		HG1		HG2		HG3		HG4		HG5		HG6
time	nC	time	nC	time	nC	time	nC	time	nC	time	nC	time	nC	time	nC
0	0.1167	0	-0.0513	0.000167	0.319601	0.000333	0.2063	0.000333	0.609	0	0.322001	0.000333	0.502951	0.000333	0.5984
0.008333	0.0999	0.008333	-0.05755	0.0085	0.277251	0.008667	0.16685	0.008667	0.57405	0.008333	0.302451	0.008667	0.467051	0.008667	0.5617
0.016667	0.1046	0.016667	-0.0366	0.016833	0.271551	0.017	0.1615	0.017	0.5707	0.016667	0.294201	0.017	0.453451	0.017	0.5584
0.025	0.10715	0.025	-0.02595	0.025167	0.279051	0.025333	0.167	0.025333	0.5737	0.025	0.303501	0.025333	0.460951	0.025333	0.5612
0.033333	0.1096	0.033333	-0.02155	0.0335	0.282251	0.033667	0.1691	0.033667	0.5761	0.033333	0.307901	0.033667	0.465901	0.033667	0.5636
0.041667	0.10845	0.041667	-0.02175	0.041833	0.282201	0.042	0.17075	0.042	0.57735	0.041667	0.311701	0.042	0.466001	0.042	0.5642
0.05	0.1089	0.05	-0.02	0.050167	0.284601	0.050333	0.1702	0.050333	0.57635	0.05	0.313101	0.050333	0.468401	0.050333	0.56495
0.058333	0.1098	0.058333	-0.02065	0.0585	0.286101	0.058667	0.17245	0.058667	0.57555	0.058333	0.314501	0.058667	0.470701	0.058667	0.5619
0.066667	0.11095	0.066667	-0.01925	0.066833	0.285201	0.067	0.1724	0.067	0.57685	0.066667	0.312501	0.067	0.469101	0.067	0.5622
0.075	0.1108	0.075	-0.0191	0.075167	0.287751	0.075333	0.1732	0.075333	0.57615	0.075	0.316101	0.075333	0.469951	0.075333	0.5632
0.083333	0.11145	0.083333	-0.01885	0.0835	0.286101	0.083667	0.1729	0.083667	0.57745	0.083333	0.315801	0.083667	0.470651	0.083667	0.56215
0.091667	0.11145	0.091667	-0.0185	0.091833	0.285351	0.092	0.17395	0.092	0.57715	0.091667	0.317451	0.092	0.472451	0.092	0.56285
0.1	0.1116	0.1	-0.01945	0.100167	0.286551	0.100333	0.17265	0.100333	0.5767	0.1	0.317451	0.100333	0.469801	0.100333	0.5632
0.108333	0.1127	0.108333	-0.0185	0.1085	0.286551	0.108667	0.1748	0.108667	0.57815	0.108333	0.317601	0.108667	0.471501	0.108667	0.56305
0.116667	0.11395	0.116667	-0.01825	0.116833	0.288801	0.117	0.17335	0.117	0.57855	0.116667	0.320201	0.117	0.473351	0.117	0.563
0.125	0.11175	0.125	-0.023	0.125167	0.288401	0.125333	0.17485	0.125333	0.5779	0.125	0.320451	0.125333	0.473101	0.125333	0.56265
0.133333	0.1143	0.133333	-0.02145	0.1335	0.288251	0.133667	0.17285	0.133667	0.57785	0.133333	0.318401	0.133667	0.471651	0.133667	0.5627
0.141667	0.114	0.141667	-0.0209	0.141833	0.291001	0.142	0.17465	0.142	0.578	0.141667	0.319851	0.142	0.473951	0.142	0.56185
0.15	0.11545	0.15	-0.021	0.150167	0.290551	0.150333	0.1739	0.150333	0.5795	0.15	0.321401	0.150333	0.474051	0.150333	0.563
0.158333	0.11615	0.158333	-0.02035	0.1585	0.292051	0.158667	0.1737	0.158667	0.57915	0.158333	0.322951	0.158667	0.473701	0.158667	0.5608
0.166667	0.11475	0.166667	-0.0213	0.166833	0.293351	0.167	0.1727	0.167	0.5796	0.166667	0.324851	0.167	0.476351	0.167	0.562
0.175	0.1179	0.175	-0.0181	0.175167	0.295501	0.175333	0.1749	0.175333	0.5814	0.175	0.325951	0.175333	0.477401	0.175333	0.5622
0.183333	0.11545	0.183333	-0.0199	0.1835	0.29455	0.183667	0.17595	0.183667	0.58465	0.183333	0.326101	0.183667	0.477601	0.183667	0.56285
0.191667	0.11635	0.191667	-0.0196	0.191833	0.295	0.192	0.1746	0.192	0.58425	0.191667	0.324401	0.192	0.477651	0.192	0.56285
0.2	0.1166	0.2	-0.01775	0.200167	0.29675	0.200333	0.17435	0.200333	0.58365	0.2	0.326351	0.200333	0.478251	0.200333	0.5621
0.208333	0.11325	0.208333	-0.0199	0.2085	0.295	0.208667	0.1748	0.208667	0.58325	0.208333	0.326251	0.208667	0.477651	0.208667	0.56245
0.216667	0.1182	0.216667	-0.0172	0.216833	0.29855	0.217	0.17415	0.217	0.58465	0.216667	0.328001	0.217	0.479351	0.217	0.56145
0.225	0.11565	0.225	-0.0166	0.225167	0.29785	0.225333	0.17645	0.225333	0.58515	0.225	0.328101	0.225333	0.482051	0.225333	0.56225
0.233333	0.1187	0.233333	-0.01775	0.2335	0.30055	0.233667	0.17615	0.233667	0.58425	0.233333	0.329501	0.233667	0.480101	0.233667	0.56245
0.241667	0.1181	0.241667	-0.01815	0.241833	0.2993	0.242	0.17585	0.242	0.58565	0.241667	0.327101	0.242	0.479151	0.242	0.56285
0.25	0.11725	0.25	-0.0191	0.250167	0.3	0.250333	0.17635	0.250333	0.5865	0.25	0.328951	0.250333	0.482301	0.250333	0.5627
0.258333	0.11845	0.258333	-0.01805	0.2585	0.30015	0.258667	0.1765	0.258667	0.58655	0.258333	0.3308	0.258667	0.480601	0.258667	0.56135
0.266667	0.1174	0.266667	-0.019	0.266833	0.30355	0.267	0.17755	0.267	0.58675	0.266667	0.33195	0.267	0.482401	0.267	0.5625
0.275	0.11825	0.275	-0.01935	0.275167	0.30335	0.275333	0.17555	0.275333	0.5897	0.275	0.33445	0.275333	0.483501	0.275333	0.5638
0.283333	0.1188	0.283333	-0.02015	0.2835	0.30415	0.283667	0.17585	0.283667	0.5894	0.283333	0.33485	0.283667	0.484751	0.283667	0.56215
0.291667	0.1198	0.291667	-0.01925	0.291833	0.30315	0.292	0.17575	0.292	0.59055	0.291667	0.3349	0.292	0.484301	0.292	0.5619
0.3	0.12155	0.3	-0.0181	0.300167	0.30585	0.300333	0.1756	0.300333	0.58955	0.3	0.3365	0.300333	0.486651	0.300333	0.5606
0.308333	0.11925	0.308333	-0.01985	0.3085	0.3044	0.308667	0.17725	0.308667	0.59185	0.308333	0.3366	0.308667	0.485901	0.308667	0.5621
0.316667	0.122	0.316667	-0.01795	0.316833	0.305	0.317	0.17755	0.317	0.5911	0.316667	0.33645	0.317	0.487601	0.317	0.561
0.325	0.1386	0.325	-0.00095	0.325167	0.3053	0.325333	0.17655	0.325333	0.5918	0.325	0.3378	0.325333	0.487001	0.325333	0.56085
0.333333	0.16115	0.333333	0.02125	0.3335	0.30655	0.333667	0.1771	0.333667	0.59355	0.333333	0.33845	0.333667	0.488601	0.333667	0.56055
0.341667	-0.12525	0.341667	-0.266	0.341833	0.3058	0.342	0.1779	0.342	0.59375	0.341667	0.3384	0.342	0.488851	0.342	0.5614
0.35	0.10475	0.35	-0.03675	0.350167	0.3082	0.350333	0.17745	0.350333	0.59195	0.35	0.3382	0.350333	0.489051	0.350333	0.5599
0.358333	0.1436	0.358333	0.0023	0.3585	0.3092	0.358667	0.1775	0.358667	0.59575	0.358333	0.3398	0.358667	0.489051	0.358667	0.56085
0.366667	0.139	0.366667	-0.00265	0.366833	0.30895	0.367	0.1778	0.367	0.5964	0.366667	0.3409	0.367	0.490801	0.367	0.5599
0.375	0.1321	0.375	-0.0081	0.375167	0.30875	0.375333	0.17875	0.375333	0.59615	0.375	0.33945	0.375333	0.490201	0.375333	0.56075
0.383333	0.1321	0.383333	-0.01165	0.3835	0.3107	0.383667	0.17705	0.383667	0.6012	0.383333	0.33975	0.383667	0.492051	0.383667	0.56125
0.391667	0.13135	0.391667	-0.0132	0.391833	0.3121	0.392	0.17715	0.392	0.59635	0.391667	0.3416	0.392	0.490501	0.392	0.56065
0.4	0.1309	0.4	-0.01065	0.400167	0.3123	0.400333	0.1781	0.400333	0.5946	0.4	0.3418	0.400333	0.493001	0.400333	0.5586
0.408333	0.12975	0.408333	-0.0133	0.4085	0.31345	0.408667	0.1771	0.408667	0.59575	0.408333	0.3426	0.408667	0.493701	0.408667	0.5587
0.416667	0.13035	0.416667	-0.0128	0.416833	0.3115	0.417	0.1764	0.417	0.5956	0.416667	0.3426	0.417	0.493701	0.417	0.55815
0.425	0.13315	0.425	-0.0101	0.425167	0.3141	0.425333	0.17705	0.425333	0.59735	0.425	0.34355	0.425333	0.492051	0.425333	0.5584
0.433333	0.1319	0.433333	-0.01305	0.4335	0.31315	0.433667	0.1774	0.433667	0.59805	0.433333	0.3428	0.433667	0.492551	0.433667	0.55915
0.441667	0.119	0.441667	-0.02675	0.441833	0.31125	0.442	0.1772	0.442	0.59705	0.441667	0.3412	0.442	0.491701	0.442	0.55945
0.45	0.1102	0.45	-0.0352	0.450167	0.3127	0.450333	0.17795	0.450333	0.59725	0.45	0.34235	0.450333	0.491451	0.450333	0.55865
0.458333	0.10025	0.458333	-0.04645	0.4585	0.3157	0.458667	0.1781	0.458667	0.5994	0.458333	0.3446	0.458667	0.493801	0.458667	0.55955
0.466667	0.0777	0.466667	-0.0691	0.466833	0.31605	0.467	0.17815	0.467	0.59965	0.466667	0.34595	0.467	0.495401	0.467	0.5591
0.475	0.1414	0.475	-0.00565	0.475167	0.31535	0.475333	0.17815	0.475333	0.60185	0.475	0.3437	0.475333	0.493651	0.475333	0.5591
0.483333	0.1334	0.483333	-0.01295	0.4835	0.3177	0.483667	0.1772	0.483667	0.60135	0.483333	0.3468	0.483667	0.495651	0.483667	0.55935
0.491667	0.19405	0.491667	0.04615	0.491833	0.31845	0.492	0.17775	0.492	0.60325	0.491667	0.3471	0.492	0.495451	0.492	0.55895
0.5	0.1514	0.5	0.003	0.500167	0.31695	0.500333	0.17665	0.500333	0.6044	0.5	0.3476	0.500333	0.494801	0.500333	0.5607
0.508333	0.1426	0.508333	-0.0055	0.5085	0.31745	0.508667	0.17915	0.508667	0.60495	0.508333	0.34715	0.508667	0.495401	0.508667	0.5583
0.516667	0.13375	0.516667	-0.0159	0.516833	0.31775	0.517	0.1779	0.517	0.60465	0.516667	0.3481	0.517	0.497151	0.517	0.55895
0.525	0.13275	0.525	-0.0152	0.525167	0.3183	0.525333	0.1773	0.525333	0.60545	0.525	0.3479	0.525333	0.494301	0.525333	0.55695
0.533333	0.1303	0.533333	-0.016	0.5335	0.3202	0.533667	0.17735	0.533667	0.60555	0.533333	0.35165	0.533667	0.496851	0.533667	0.55785
0.541667	0.13155	0.541667	-0.016	0.541833	0.32065	0.542	0.17745	0.542	0.6047	0.541667	0.34905	0.542	0.497801	0.542	0.556
0.55	0.13605	0.55	-0.0137	0.550167	0.322	0.550333	0.17825	0.550333	0.6055	0.55	0.35205	0.550333	0.499751	0.550333	0.5562
0.558333	0.1431	0.558333	-0.00655	0.5585	0.32175	0.558667	0.17755	0.558667	0.60685	0.558333	0.3503	0.558667	0.498151	0.558667	0.55565
0.566667	0.15405	0.566667	0.0048	0.566833	0.3212	0.567	0.17815	0.567	0.60645	0.566667	0.35195	0.567	0.499801	0.567	0.55605
0.575	0.13775	0.575	-0.01185	0.575167	0.3225	0.575333	0.1777	0.575333	0.60765	0.575	0.3518	0.575333	0.499301	0.575333	0.5559
0.583333	0.14725	0.583333	-0.00455	0.5835	0.32195	0.583667	0.17645	0.583667	0.60725	0.583333	0.35185	0.583667	0.499001	0.583667	0.5559
0.591667	0.12475	0.591667	-0.02555	0.591833	0.3238	0.592	0.17595	0.592	0.60695	0.591667	0.3518	0.592	0.499651	0.592	0.55515
0.6	0.1513	0.6	-0.0009	0.600167	0.323	0.600333	0.17805	0.600333	0.60785	0.6	0.35195	0.600333	0.499401	0.600333	0.55525
0.608333	0.14575	0.608333	-0.00655	0.6085	0.3228	0.608667	0.1773	0.608667	0.60925	0.608333	0.35125	0.608667	0.497901	0.608667	0.55595
0.616667	0.14205	0.616667	-0.0109	0.616833	0.3242	0.617	0.17865	0.617	0.6091	0.616667	0.35085	0.617	0.4974	0.617	0.5546
0.625	0.141	0.625	-0.01045	0.625167	0.32375	0.625333	0.17775	0.625333	0.60995	0.625	0.34995	0.625333	0.4996	0.625333	0.55405
0.633333	0.13755	0.633333	-0.01355	0.6335	0.3255	0.633667	0.17805	0.633667	0.60885	0.633333	0.3532	0.633667	0.49955	0.633667	0.5563
0.641667	0.1376	0.641667	-0.0142	0.641833	0.32645	0.642	0.1766	0.642	0.6101	0.641667	0.35355	0.642	0.4999	0.642	0.5563
0.65	0.13785	0.65	-0.01395	0.650167	0.326	0.650333	0.1768	0.650333	0.6084	0.65	0.35245	0.650333	0.50025	0.650333	0.55645
0.658333	0.13855	0.658333	-0.0145	0.6585	0.32565	0.658667	0.17705	0.658667	0.60925	0.658333	0.3547	0.658667	0.50145	0.658667	0.5533
0.666667	0.13755	0.666667	-0.01535	0.666833	0.3257	0.667	0.1787	0.667	0.6099	0.666667	0.35445	0.667	0.50135	0.667	0.5533
0.675	0.1389	0.675	-0.01475	0.675167	0.32755	0.675333	0.1777	0.675333	0.6108	0.675	0.35755	0.675333	0.5017	0.675333	0.55305
0.683333	0.13875	0.683333	-0.0138	0.6835	0.32975	0.683667	0.1798	0.683667	0.6115	0.683333	0.35885	0.683667	0.5046	0.683667	0.55225
0.691667	0.14005	0.691667	-0.01275	0.691833	0.32685	0.692	0.1768	0.692	0.6114	0.691667	0.35755	0.692	0.5022	0.692	0.55305
0.7	0.1399	0.7	-0.01535	0.700167	0.32765	0.700333	0.1784	0.700333	0.6107	0.7	0.35575	0.700333	0.5034	0.700333	0.551
0.708333	0.14375	0.708333	-0.01225	0.7085	0.3277	0.708667	0.17965	0.708667	0.61435	0.708333	0.35755	0.708667	0.50395	0.708667	0.5533
0.716667	0.2136	0.716667	0.05985	0.716833	0.33	0.717	0.17875	0.717	0.6132	0.716667	0.3587	0.717	0.5052	0.717	0.55155
0.725	0.15275	0.725	-0.0038	0.725167	0.32915	0.725333	0.18035	0.725333	0.61285	0.725	0.35855	0.725333	0.5048	0.725333	0.5508
0.733333	0.18455	0.733333	0.0275	0.7335	0.331	0.733667	0.17895	0.733667	0.61445	0.733333	0.36045	0.733667	0.50675	0.733667	0.55095
0.741667	0.10535	0.741667	-0.05035	0.741833	0.3315	0.742	0.178	0.742	0.6158	0.741667	0.36075	0.742	0.5059	0.742	0.5519
0.75	0.12025	0.75	-0.03515	0.750167	0.33305	0.750333	0.18015	0.750333	0.6157	0.75	0.35975	0.750333	0.50645	0.750333	0.5505
0.758333	0.15235	0.758333	-0.0052	0.7585	0.33165	0.758667	0.1774	0.758667	0.6145	0.758333	0.36005	0.758667	0.50715	0.758667	0.55285
0.766667	0.22085	0.766667	0.0642	0.766833	0.33345	0.767	0.18005	0.767	0.6149	0.766667	0.3612	0.767	0.50715	0.767	0.55235
0.775	0.13135	0.775	-0.02355	0.775167	0.33295	0.775333	0.1786	0.775333	0.6152	0.775	0.36105	0.775333	0.50645	0.775333	0.5511
0.783333	0.12085	0.783333	-0.03545	0.7835	0.33405	0.783667	0.17885	0.783667	0.6173	0.783333	0.3617	0.783667	0.5093	0.783667	0.54935
0.791667	0.12915	0.791667	-0.02815	0.791833	0.33435	0.792	0.17925	0.792	0.61565	0.791667	0.3616	0.792	0.5094	0.792	0.54905
0.8	0.136	0.8	-0.0225	0.800167	0.33475	0.800333	0.1799	0.800333	0.6175	0.8	0.36205	0.800333	0.50615	0.800333	0.5484
0.808333	0.14025	0.808333	-0.01915	0.8085	0.3358	0.808667	0.17915	0.808667	0.6172	0.808333	0.3622	0.808667	0.5083	0.808667	0.5467
0.816667	0.1451	0.816667	-0.01575	0.816833	0.3337	0.817	0.1792	0.817	0.6176	0.816667	0.3625	0.817	0.50675	0.817	0.5493
0.825	0.1452	0.825	-0.0145	0.825167	0.3356	0.825333	0.1807	0.825333	0.6182	0.825	0.36275	0.825333	0.50815	0.825333	0.5507
0.833333	0.14525	0.833333	-0.0157	0.8335	0.33645	0.833667	0.178	0.833667	0.61855	0.833333	0.3647	0.833667	0.5091	0.833667	0.5488
0.841667	0.1469	0.841667	-0.0149	0.841833	0.33625	0.842	0.1792	0.842	0.617	0.841667	0.36345	0.842	0.5082	0.842	0.54885
0.85	0.1492	0.85	-0.01305	0.850167	0.33525	0.850333	0.178	0.850333	0.61895	0.85	0.3649	0.850333	0.5075	0.850333	0.5493
0.858333	0.1483	0.858333	-0.0136	0.8585	0.33615	0.858667	0.17815	0.858667	0.6187	0.858333	0.3627	0.858667	0.50675	0.858667	0.54895
0.866667	0.14835	0.866667	-0.01285	0.866833	0.3385	0.867	0.17765	0.867	0.61995	0.866667	0.3646	0.867	0.51005	0.867	0.5487
0.875	0.1479	0.875	-0.0138	0.875167	0.337	0.875333	0.17815	0.875333	0.6211	0.875	0.3651	0.875333	0.51	0.875333	0.54865
0.883333	0.1502	0.883333	-0.01285	0.8835	0.33655	0.883667	0.17745	0.883667	0.6188	0.883333	0.36375	0.883667	0.5096	0.883667	0.54645
0.891667	0.15085	0.891667	-0.01305	0.891833	0.33755	0.892	0.17805	0.892	0.61935	0.891667	0.3658	0.892	0.5104	0.892	0.54655
0.9	0.1515	0.9	-0.01085	0.900167	0.3391	0.900333	0.17705	0.900333	0.62095	0.9	0.3669	0.900333	0.51065	0.900333	0.54775
0.908333	0.15275	0.908333	-0.0098	0.9085	0.3393	0.908667	0.1781	0.908667	0.619	0.908333	0.36685	0.908667	0.5108	0.908667	0.545
0.916667	0.15175	0.916667	-0.01195	0.916833	0.3397	0.917	0.17885	0.917	0.61985	0.916667	0.36665	0.917	0.51115	0.917	0.5459
0.925	0.15145	0.925	-0.0149	0.925167	0.3408	0.925333	0.17765	0.925333	0.62235	0.925	0.36895	0.925333	0.51035	0.925333	0.54415
0.933333	0.15015	0.933333	-0.0135	0.9335	0.34325	0.933667	0.1781	0.933667	0.62295	0.933333	0.3681	0.933667	0.51195	0.933667	0.5443
0.941667	0.15225	0.941667	-0.0136	0.941833	0.34085	0.942	0.1777	0.942	0.62375	0.941667	0.36905	0.942	0.51245	0.942	0.5447
0.95	0.15285	0.95	-0.0142	0.950167	0.34345	0.950333	0.17665	0.950333	0.6212	0.95	0.36975	0.950333	0.51205	0.950333	0.5443
0.958333	0.1536	0.958333	-0.0154	0.9585	0.3416	0.958667	0.177	0.958667	0.62305	0.958333	0.3674	0.958667	0.51075	0.958667	0.5451
0.966667	0.15385	0.966667	-0.0132	0.966833	0.34195	0.967	0.1778	0.967	0.6224	0.966667	0.3682	0.967	0.51015	0.967	0.54375
0.975	0.15595	0.975	-0.01375	0.975167	0.34415	0.975333	0.1771	0.975333	0.62295	0.975	0.3705	0.975333	0.51305	0.975333	0.54465
0.983333	0.1543	0.983333	-0.0146	0.9835	0.34335	0.983667	0.17655	0.983667	0.6224	0.983333	0.36935	0.983667	0.51055	0.983667	0.5424
0.991667	0.1548	0.991667	-0.01295	0.991833	0.3433	0.992	0.17665	0.992	0.62265	0.991667	0.36955	0.992	0.5102	0.992	0.54165
1	0.1552	1	-0.01445	1.00017	0.3432	1.00033	0.17455	1.00033	0.62245	1	0.36995	1.00033	0.51345	1.00033	0.54245
1.00833	0.1562	1.00833	-0.01575	1.0085	0.34565	1.00867	0.1746	1.00867	0.62255	1.00833	0.3717	1.00867	0.51345	1.00867	0.5439
1.01667	0.1565	1.01667	-0.01665	1.01683	0.34455	1.017	0.17595	1.017	0.62455	1.01667	0.37085	1.017	0.5127	1.017	0.5431
1.025	0.15735	1.025	-0.01635	1.02517	0.34655	1.02533	0.1731	1.02533	0.6253	1.025	0.3727	1.02533	0.5131	1.02533	0.54375
1.03333	0.1556	1.03333	-0.01715	1.0335	0.34425	1.03367	0.17375	1.03367	0.6253	1.03333	0.37095	1.03367	0.51365	1.03367	0.54235
1.04167	0.1568	1.04167	-0.01575	1.04183	0.3466	1.042	0.17295	1.042	0.6254	1.04167	0.37255	1.042	0.5127	1.042	0.54235
1.05	0.15775	1.05	-0.01665	1.05017	0.34775	1.05033	0.17605	1.05033	0.6256	1.05	0.37305	1.05033	0.5137	1.05033	0.54085
1.05833	0.1566	1.05833	-0.0216	1.0585	0.34665	1.05867	0.1748	1.05867	0.62645	1.05833	0.3739	1.05867	0.51345	1.05867	0.54185
1.06667	0.15855	1.06667	-0.00165	1.06683	0.34645	1.067	0.1763	1.067	0.6272	1.06667	0.3724	1.067	0.5129	1.067	0.54075
1.075	0.15895	1.075	-0.03165	1.07517	0.34775	1.07533	0.1738	1.07533	0.6282	1.075	0.37235	1.07533	0.5123	1.07533	0.5403
1.08333	0.1596	1.08333	0.0822	1.0835	0.34835	1.08367	0.17435	1.08367	0.6279	1.08333	0.37545	1.08367	0.5121	1.08367	0.53925
1.09167	0.1615	1.09167	0.027	1.09183	0.34595	1.092	0.17485	1.092	0.628	1.09167	0.3726	1.092	0.5112	1.092	0.53995
1.1	0.1616	1.1	-0.0023	1.10017	0.348	1.10033	0.175	1.10033	0.62645	1.1	0.37415	1.10033	0.5129	1.10033	0.5384
1.10833	0.1626	1.10833	-0.0246	1.1085	0.3469	1.10867	0.17235	1.10867	0.6283	1.10833	0.3728	1.10867	0.51195	1.10867	0.53945
1.11667	0.16075	1.11667	-0.02075	1.11683	0.3477	1.117	0.17505	1.117	0.6294	1.11667	0.3735	1.117	0.51185	1.117	0.5393
1.125	0.16385	1.125	-0.0164	1.12517	0.3485	1.12533	0.17525	1.12533	0.6283	1.125	0.3731	1.12533	0.51335	1.12533	0.5387
1.13333	0.16195	1.13333	-0.01705	1.1335	0.3495	1.13367	0.1729	1.13367	0.62825	1.13333	0.37315	1.13367	0.51485	1.13367	0.53785
1.14167	0.1648	1.14167	-0.01635	1.14183	0.35005	1.142	0.1716	1.142	0.62975	1.14167	0.3741	1.142	0.51455	1.142	0.5377
1.15	0.16355	1.15	-0.01635	1.15017	0.34735	1.15033	0.1715	1.15033	0.62775	1.15	0.3724	1.15033	0.51185	1.15033	0.5363
1.15833	0.1652	1.15833	-0.01625	1.1585	0.35075	1.15867	0.1745	1.15867	0.62835	1.15833	0.37555	1.15867	0.51445	1.15867	0.5368
1.16667	0.1647	1.16667	-0.0163	1.16683	0.34925	1.167	0.17095	1.167	0.63385	1.16667	0.3746	1.167	0.5145	1.167	0.5365
1.175	0.1658	1.175	-0.0171	1.17517	0.35145	1.17533	0.1732	1.17533	0.62805	1.175	0.3736	1.17533	0.5124	1.17533	0.5367
1.18333	0.1641	1.18333	-0.0158	1.1835	0.35155	1.18367	0.17045	1.18367	0.62775	1.18333	0.37615	1.18367	0.51475	1.18367	0.536
1.19167	0.16525	1.19167	-0.01735	1.19183	0.35275	1.192	0.17095	1.192	0.6277	1.19167	0.3761	1.192	0.51505	1.192	0.5362
1.2	0.16475	1.2	-0.01685	1.20017	0.3517	1.20033	0.17055	1.20033	0.62815	1.2	0.37725	1.20033	0.51545	1.20033	0.5359
1.20833	0.1658	1.20833	-0.0195	1.2085	0.3531	1.20867	0.1712	1.20867	0.629	1.20833	0.3763	1.20867	0.5151	1.20867	0.5354
1.21667	0.16485	1.21667	-0.0192	1.21683	0.3516	1.217	0.17005	1.217	0.62965	1.21667	0.37625	1.217	0.515	1.217	0.5361
1.225	0.16705	1.225	-0.0172	1.22517	0.3509	1.22533	0.1715	1.22533	0.63195	1.225	0.37605	1.22533	0.51235	1.22533	0.53765
1.23333	0.1688	1.23333	-0.0158	1.2335	0.3525	1.23367	0.1701	1.23367	0.62965	1.23333	0.3775	1.23367	0.51475	1.23367	0.5366
1.24167	0.16965	1.24167	-0.0162	1.24183	0.3538	1.242	0.17045	1.242	0.63235	1.24167	0.37915	1.242	0.5146	1.242	0.536
1.25	0.1669	1.25	-0.01885	1.25017	0.3519	1.25033	0.1696	1.25033	0.63245	1.25	0.37665	1.25033	0.5117	1.25033	0.53535
1.25833	0.1677	1.25833	-0.0193	1.2585	0.35275	1.25867	0.1694	1.25867	0.63165	1.25833	0.3757	1.25867	0.5134	1.25867	0.53485
1.26667	0.1696	1.26667	-0.01755	1.26683	0.3531	1.267	0.1685	1.267	0.63255	1.26667	0.37725	1.267	0.5125	1.267	0.53545
1.275	0.16785	1.275	-0.01795	1.27517	0.35285	1.27533	0.1681	1.27533	0.6325	1.275	0.37805	1.27533	0.51355	1.27533	0.5347
1.28333	0.16865	1.28333	-0.01915	1.2835	0.3535	1.28367	0.1682	1.28367	0.6328	1.28333	0.3776	1.28367	0.5134	1.28367	0.5345
1.29167	0.1701	1.29167	-0.01935	1.29183	0.3544	1.292	0.16755	1.292	0.63115	1.29167	0.37865	1.292	0.5141	1.292	0.53275
1.3	0.17185	1.3	-0.02	1.30017	0.35455	1.30033	0.1691	1.30033	0.6338	1.3	0.38055	1.30033	0.5164	1.30033	0.5334
1.30833	0.1722	1.30833	-0.01845	1.3085	0.35395	1.30867	0.16945	1.30867	0.63475	1.30833	0.3795	1.30867	0.51425	1.30867	0.53335
1.31667	0.17225	1.31667	-0.0177	1.31683	0.3546	1.317	0.1675	1.317	0.63405	1.31667	0.37745	1.317	0.5143	1.317	0.53335
1.325	0.17335	1.325	-0.01705	1.32517	0.3562	1.32533	0.1685	1.32533	0.63425	1.325	0.3796	1.32533	0.5156	1.32533	0.53495
1.33333	0.175	1.33333	-0.01785	1.3335	0.3555	1.33367	0.1677	1.33367	0.6349	1.33333	0.379	1.33367	0.5146	1.33367	0.53445
1.34167	0.17265	1.34167	-0.02	1.34183	0.3566	1.342	0.16765	1.342	0.6337	1.34167	0.38045	1.342	0.51505	1.342	0.53345
1.35	0.17315	1.35	-0.0213	1.35017	0.35355	1.35033	0.1661	1.35033	0.63355	1.35	0.3793	1.35033	0.51435	1.35033	0.53205
1.35833	0.1726	1.35833	-0.02175	1.3585	0.3551	1.35867	0.16685	1.35867	0.6327	1.35833	0.3825	1.35867	0.51345	1.35867	0.5327
1.36667	0.17375	1.36667	-0.02245	1.36683	0.3563	1.367	0.16475	1.367	0.63475	1.36667	0.3815	1.367	0.5139	1.367	0.5324
1.375	0.17315	1.375	-0.02035	1.37517	0.3571	1.37533	0.16655	1.37533	0.63335	1.375	0.3822	1.37533	0.5157	1.37533	0.5311
1.38333	0.17365	1.38333	-0.021	1.3835	0.3557	1.38367	0.16625	1.38367	0.6349	1.38333	0.3796	1.38367	0.51425	1.38367	0.53345
1.39167	0.17405	1.39167	-0.0195	1.39183	0.3565	1.392	0.1658	1.392	0.63525	1.39167	0.3829	1.392	0.51585	1.392	0.5338
1.4	0.1733	1.4	-0.021	1.40017	0.3573	1.40033	0.1673	1.40033	0.63665	1.4	0.38285	1.40033	0.51575	1.40033	0.53275
1.40833	0.17405	1.40833	-0.02085	1.4085	0.3564	1.40867	0.16655	1.40867	0.6349	1.40833	0.3812	1.40867	0.51535	1.40867	0.53115
1.41667	0.17555	1.41667	-0.0206	1.41683	0.35665	1.417	0.16725	1.417	0.6333	1.41667	0.381	1.417	0.513	1.417	0.52915
1.425	0.1736	1.425	-0.02075	1.42517	0.35815	1.42533	0.16505	1.42533	0.63585	1.425	0.38255	1.42533	0.5146	1.42533	0.52975
1.43333	0.1758	1.43333	-0.01765	1.4335	0.3558	1.43367	0.16455	1.43367	0.6341	1.43333	0.38335	1.43367	0.51505	1.43367	0.5305
1.44167	0.17845	1.44167	-0.01615	1.44183	0.35475	1.442	0.16445	1.442	0.6331	1.44167	0.37995	1.442	0.51355	1.442	0.5284
1.45	0.17895	1.45	-0.0181	1.45017	0.35565	1.45033	0.16575	1.45033	0.6345	1.45	0.37925	1.45033	0.51215	1.45033	0.5289
1.45833	0.17705	1.45833	-0.0188	1.4585	0.3574	1.45867	0.1629	1.45867	0.6349	1.45833	0.382	1.45867	0.5126	1.45867	0.5271
1.46667	0.17795	1.46667	-0.01755	1.46683	0.3572	1.467	0.1647	1.467	0.6346	1.46667	0.3827	1.467	0.5148	1.467	0.52795
1.475	0.175	1.475	-0.0188	1.47517	0.3555	1.47533	0.1627	1.47533	0.63305	1.475	0.3811	1.47533	0.5128	1.47533	0.52545
1.48333	0.1765	1.48333	-0.01915	1.4835	0.35865	1.48367	0.1628	1.48367	0.63375	1.48333	0.38275	1.48367	0.5145	1.48367	0.526
1.49167	0.1761	1.49167	-0.02	1.49183	0.356	1.492	0.16235	1.492	0.6367	1.49167	0.3816	1.492	0.5134	1.492	0.5259
1.5	0.17545	1.5	-0.0216	1.50017	0.3578	1.50033	0.16295	1.50033	0.63635	1.5	0.3829	1.50033	0.51455	1.50033	0.526
1.50833	0.17755	1.50833	-0.02125	1.5085	0.35735	1.50867	0.16205	1.50867	0.6352	1.50833	0.38745	1.50867	0.5149	1.50867	0.5264
1.51667	0.17945	1.51667	-0.02485	1.51683	0.35585	1.517	0.15965	1.517	0.6341	1.51667	0.3821	1.517	0.51125	1.517	0.52745
1.525	0.17925	1.525	-0.0291	1.52517	0.3571	1.52533	0.1607	1.52533	0.63295	1.525	0.38285	1.52533	0.5135	1.52533	0.52405
1.53333	0.1801	1.53333	-0.07715	1.5335	0.3562	1.53367	0.16035	1.53367	0.63405	1.53333	0.383	1.53367	0.51165	1.53367	0.52435
1.54167	0.1805	1.54167	0.0161	1.54183	0.35385	1.542	0.15995	1.542	0.63435	1.54167	0.3812	1.542	0.51135	1.542	0.52405
1.55	0.1807	1.55	0.17025	1.55017	0.35955	1.55033	0.1597	1.55033	0.635	1.55	0.3837	1.55033	0.5127	1.55033	0.5236
1.55833	0.1814	1.55833	-0.01165	1.5585	0.3579	1.55867	0.1581	1.55867	0.63435	1.55833	0.381	1.55867	0.51335	1.55867	0.5232
1.56667	0.1825	1.56667	-0.04245	1.56683	0.3577	1.567	0.16045	1.567	0.63315	1.56667	0.3818	1.567	0.51335	1.567	0.522
1.575	0.1827	1.575	-0.0271	1.57517	0.3558	1.57533	0.1603	1.57533	0.6336	1.575	0.3825	1.57533	0.5134	1.57533	0.5219
1.58333	0.1816	1.58333	-0.02405	1.5835	0.3568	1.58367	0.15985	1.58367	0.6332	1.58333	0.3821	1.58367	0.5123	1.58367	0.52135
1.59167	0.1811	1.59167	-0.0234	1.59183	0.3558	1.592	0.1598	1.592	0.63395	1.59167	0.381	1.592	0.51205	1.592	0.5235
1.6	0.18325	1.6	-0.02295	1.60017	0.35535	1.60033	0.1589	1.60033	0.6323	1.6	0.3811	1.60033	0.5097	1.60033	0.52055
1.60833	0.18195	1.60833	-0.022	1.6085	0.35455	1.60867	0.15995	1.60867	0.63355	1.60833	0.3797	1.60867	0.50915	1.60867	0.52105
1.61667	0.18235	1.61667	-0.0205	1.61683	0.35475	1.617	0.1568	1.617	0.6331	1.61667	0.3825	1.617	0.50985	1.617	0.51985
1.625	0.17975	1.625	-0.0241	1.62517	0.35435	1.62533	0.15705	1.62533	0.6331	1.625	0.3826	1.62533	0.5109	1.62533	0.52065
1.63333	0.18045	1.63333	-0.02145	1.6335	0.3557	1.63367	0.1579	1.63367	0.63315	1.63333	0.38085	1.63367	0.50935	1.63367	0.5197
1.64167	0.18235	1.64167	-0.0219	1.64183	0.35565	1.642	0.1564	1.642	0.63395	1.64167	0.38235	1.642	0.5111	1.642	0.5208
1.65	0.18205	1.65	-0.0226	1.65017	0.35565	1.65033	0.15635	1.65033	0.6349	1.65	0.38205	1.65033	0.50985	1.65033	0.52
1.65833	0.18185	1.65833	-0.02275	1.6585	0.35595	1.65867	0.15525	1.65867	0.63325	1.65833	0.38175	1.65867	0.5094	1.65867	0.51755
1.66667	0.183	1.66667	-0.02175	1.66683	0.3558	1.667	0.15515	1.667	0.6318	1.66667	0.3822	1.667	0.50975	1.667	0.51625
1.675	0.1837	1.675	-0.0224	1.67517	0.35605	1.67533	0.15475	1.67533	0.63445	1.675	0.38165	1.67533	0.5103	1.67533	0.51775
1.68333	0.18435	1.68333	-0.02085	1.6835	0.3562	1.68367	0.1545	1.68367	0.63445	1.68333	0.3833	1.68367	0.51025	1.68367	0.5189
1.69167	0.18325	1.69167	-0.0216	1.69183	0.35695	1.692	0.15495	1.692	0.63195	1.69167	0.38145	1.692	0.5111	1.692	0.51595
1.7	0.18415	1.7	-0.0219	1.70017	0.3566	1.70033	0.1556	1.70033	0.63225	1.7	0.3802	1.70033	0.5082	1.70033	0.51715
1.70833	0.1838	1.70833	-0.0219	1.7085	0.35675	1.70867	0.15355	1.70867	0.6327	1.70833	0.38195	1.70867	0.5096	1.70867	0.5172
1.71667	0.18535	1.71667	-0.0204	1.71683	0.35525	1.717	0.1559	1.717	0.6315	1.71667	0.3788	1.717	0.50765	1.717	0.51555
1.725	0.18235	1.725	-0.0218	1.72517	0.35475	1.72533	0.1559	1.72533	0.63045	1.725	0.3806	1.72533	0.508	1.72533	0.5143
1.73333	0.16215	1.73333	-0.02235	1.7335	0.3558	1.73367	0.1558	1.73367	0.63155	1.73333	0.37885	1.73367	0.50475	1.73367	0.51495
1.74167	0.19275	1.74167	-0.02175	1.74183	0.3568	1.742	0.1551	1.742	0.63165	1.74167	0.3803	1.742	0.50765	1.742	0.51465
1.75	0.2083	1.75	-0.02215	1.75017	0.3543	1.75033	0.1561	1.75033	0.62955	1.75	0.37935	1.75033	0.506	1.75033	0.514
1.75833	0.24155	1.75833	-0.02415	1.7585	0.35525	1.75867	0.15395	1.75867	0.62855	1.75833	0.38	1.75867	0.506	1.75867	0.5132
1.76667	0.15385	1.76667	-0.0212	1.76683	0.35585	1.767	0.1545	1.767	0.6317	1.76667	0.37895	1.767	0.5053	1.767	0.5147
1.775	0.1716	1.775	-0.02245	1.77517	0.35425	1.77533	0.15145	1.77533	0.63005	1.775	0.3797	1.77533	0.5061	1.77533	0.5145
1.78333	0.1796	1.78333	-0.01905	1.7835	0.3532	1.78367	0.1522	1.78367	0.62815	1.78333	0.37895	1.78367	0.50365	1.78367	0.51285
1.79167	0.1803	1.79167	-0.02105	1.79183	0.3537	1.792	0.15225	1.792	0.62955	1.79167	0.3793	1.792	0.5031	1.792	0.513
1.8	0.18275	1.8	-0.02315	1.80017	0.35375	1.80033	0.15085	1.80033	0.63105	1.8	0.37945	1.80033	0.5024	1.80033	0.51285
1.80833	0.1819	1.80833	-0.02335	1.8085	0.35435	1.80867	0.15255	1.80867	0.63195	1.80833	0.3809	1.80867	0.5039	1.80867	0.5136
1.81667	0.18485	1.81667	-0.02155	1.81683	0.3532	1.817	0.15105	1.817	0.63245	1.81667	0.37965	1.817	0.5026	1.817	0.51365
1.825	0.18495	1.825	-0.02305	1.82517	0.3542	1.82533	0.1512	1.82533	0.6319	1.825	0.3772	1.82533	0.5026	1.82533	0.5118
1.83333	0.18305	1.83333	-0.02465	1.8335	0.35375	1.83367	0.1495	1.83367	0.632	1.83333	0.37995	1.83367	0.50245	1.83367	0.51295
1.84167	0.1862	1.84167	-0.02055	1.84183	0.35315	1.842	0.1496	1.842	0.63045	1.84167	0.3787	1.842	0.50155	1.842	0.51025
1.85	0.1834	1.85	-0.0233	1.85017	0.3535	1.85033	0.1488	1.85033	0.6301	1.85	0.3798	1.85033	0.50205	1.85033	0.51035
1.85833	0.1858	1.85833	-0.02305	1.8585	0.35255	1.85867	0.14925	1.85867	0.6306	1.85833	0.37725	1.85867	0.50145	1.85867	0.5109
1.86667	0.1838	1.86667	-0.02415	1.86683	0.3539	1.867	0.1479	1.867	0.6309	1.86667	0.3797	1.867	0.5026	1.867	0.5104
1.875	0.1835	1.875	-0.0234	1.87517	0.3544	1.87533	0.14735	1.87533	0.63215	1.875	0.3781	1.87533	0.50235	1.87533	0.5101
1.88333	0.1844	1.88333	-0.0235	1.8835	0.3523	1.88367	0.1455	1.88367	0.63125	1.88333	0.37815	1.88367	0.50095	1.88367	0.50955
1.89167	0.1871	1.89167	-0.0222	1.89183	0.3535	1.892	0.14685	1.892	0.6315	1.89167	0.37785	1.892	0.50155	1.892	0.5108
1.9	0.18445	1.9	-0.0245	1.90017	0.3498	1.90033	0.14605	1.90033	0.6311	1.9	0.3777	1.90033	0.50015	1.90033	0.5099
1.90833	0.18325	1.90833	-0.0249	1.9085	0.3516	1.90867	0.146	1.90867	0.6299	1.90833	0.376	1.90867	0.5003	1.90867	0.5079
1.91667	0.18435	1.91667	-0.0259	1.91683	0.35015	1.917	0.14425	1.917	0.62815	1.91667	0.375	1.917	0.49945	1.917	0.50655
1.925	0.1838	1.925	-0.0267	1.92517	0.35155	1.92533	0.1446	1.92533	0.62695	1.925	0.3752	1.92533	0.49895	1.92533	0.5068
1.93333	0.18455	1.93333	-0.0254	1.9335	0.35045	1.93367	0.14265	1.93367	0.6297	1.93333	0.37615	1.93367	0.49805	1.93367	0.50775
1.94167	0.18525	1.94167	-0.02365	1.94183	0.35075	1.942	0.14355	1.942	0.6295	1.94167	0.381	1.942	0.49895	1.942	0.5076
1.95	0.18225	1.95	-0.02805	1.95017	0.3495	1.95033	0.143	1.95033	0.63355	1.95	0.3669	1.95033	0.49975	1.95033	0.5087
1.95833	0.1828	1.95833	-0.0268	1.9585	0.34925	1.95867	0.14165	1.95867	0.62635	1.95833	0.3686	1.95867	0.4963	1.95867	0.5075
1.96667	0.18295	1.96667	-0.0273	1.96683	0.3474	1.967	0.14285	1.967	0.62755	1.96667	0.3754	1.967	0.4955	1.967	0.5065
1.975	0.1828	1.975	-0.02675	1.97517	0.34825	1.97533	0.14265	1.97533	0.6284	1.975	0.3843	1.97533	0.49565	1.97533	0.5072
1.98333	0.1816	1.98333	-0.0279	1.9835	0.34595	1.98367	0.14255	1.98367	0.6287	1.98333	0.372	1.98367	0.4938	1.98367	0.5066
1.99167	0.1821	1.99167	-0.0271	1.99183	0.3477	1.992	0.1415	1.992	0.6292	1.99167	0.3739	1.992	0.4958	1.992	0.5063
2	0.1816	2	-0.0279	2.00017	0.3457	2.00033	0.1424	2.00033	0.6291	2	0.3711	2.00033	0.4951	2.00033	0.5042
2.00833	0.18135	2.00833	-0.02875	2.0085	0.3456	2.00867	0.14205	2.00867	0.62835	2.00833	0.3727	2.00867	0.49435	2.00867	0.50405
2.01667	0.1807	2.01667	-0.0298	2.01683	0.3466	2.017	0.13915	2.017	0.6274	2.01667	0.37385	2.017	0.49585	2.017	0.50335
2.025	0.18025	2.025	-0.0296	2.02517	0.3466	2.02533	0.13985	2.02533	0.6292	2.025	0.37455	2.02533	0.49435	2.02533	0.50345
2.03333	0.1807	2.03333	-0.0294	2.0335	0.34665	2.03367	0.14215	2.03367	0.62915	2.03333	0.3722	2.03367	0.4946	2.03367	0.5032
2.04167	0.1809	2.04167	-0.03015	2.04183	0.34685	2.042	0.13875	2.042	0.6264	2.04167	0.3744	2.042	0.4945	2.042	0.5017
2.05	0.1808	2.05	-0.02805	2.05017	0.34875	2.05033	0.13895	2.05033	0.6284	2.05	0.3736	2.05033	0.4953	2.05033	0.50095
2.05833	0.181	2.05833	-0.02665	2.0585	0.34775	2.05867	0.13995	2.05867	0.6258	2.05833	0.37605	2.05867	0.49515	2.05867	0.49805
2.06667	0.1793	2.06667	-0.02965	2.06683	0.3457	2.067	0.13645	2.067	0.6157	2.06667	0.3715	2.067	0.49315	2.067	0.48935
2.075	0.17755	2.075	-0.03165	2.07517	0.3397	2.07533	0.1324	2.07533	0.59295	2.075	0.37125	2.07533	0.4887	2.07533	0.4743
2.08333	0.17045	2.08333	-0.0396	2.0835	0.3177	2.08367	0.1091	2.08367	0.5576	2.08333	0.35315	2.08367	0.4727	2.08367	0.45405
2.09167	0.15305	2.09167	-0.0572	2.09183	0.267	2.092	0.05875	2.092	0.50935	2.09167	0.3075	2.092	0.42745	2.092	0.43885
2.1	0.13645	2.1	-0.0773	2.10017	0.1738	2.10033	-0.0299	2.10033	0.46215	2.1	0.2151	2.10033	0.3448	2.10033	0.4421
2.10833	0.13365	2.10833	-0.0865	2.1085	0.06915	2.10867	-0.12845	2.10867	0.4169	2.10833	0.09375	2.10867	0.23645	2.10867	0.45765
2.11667	0.156	2.11667	-0.06995	2.11683	-0.0225	2.117	-0.2049	2.117	0.37985	2.11667	-0.02075	2.117	0.1363	2.117	0.48145
2.125	0.2026	2.125	-0.02075	2.12517	-0.07	2.12533	-0.22455	2.12533	0.36055	2.125	-0.0878	2.12533	0.07415	2.12533	0.50365
2.13333	0.26445	2.13333	0.0531	2.1335	-0.05885	2.13367	-0.1697	2.13367	0.37405	2.13333	-0.0793	2.13367	0.0701	2.13367	0.5265
2.14167	0.33755	2.14167	0.15555	2.14183	0.0172	2.142	-0.03655	2.142	0.44565	2.14167	0.01575	2.142	0.1363	2.142	0.5681
2.15	0.4093	2.15	0.2604	2.15017	0.13455	2.15033	0.1543	2.15033	0.58745	2.15	0.17325	2.15033	0.25535	2.15033	0.65985
2.15833	0.49975	2.15833	0.3781	2.1585	0.2908	2.15867	0.4009	2.15867	0.794	2.15833	0.36855	2.15867	0.4071	2.15867	0.822
2.16667	0.62435	2.16667	0.50245	2.16683	0.49495	2.167	0.7204	2.167	1.037	2.16667	0.58665	2.167	0.60365	2.167	1.0893
2.175	0.7905	2.175	0.64535	2.17517	0.78	2.17533	1.30795	2.17533	1.2993	2.175	0.85525	2.17533	0.83595	2.17533	1.65535
2.18333	0.99365	2.18333	0.81285	2.1835	1.22505	2.18367	3.0466	2.18367	1.61905	2.18333	1.2462	2.18367	1.1423	2.18367	3.1193
2.19167	1.2266	2.19167	1.00755	2.19183	2.06405	2.192	8.3218	2.192	2.0948	2.19167	1.97995	2.192	1.5323	2.192	6.55115
2.2	1.4887	2.2	1.23185	2.20017	3.7568	2.20033	20.9252	2.20033	2.84575	2.2	3.53005	2.20033	2.0792	2.20033	13.0466
2.20833	1.7905	2.20833	1.49585	2.2085	6.8659	2.20867	43.547	2.20867	3.9314	2.20833	6.56295	2.20867	2.8583	2.20867	22.9538
2.21667	2.13265	2.21667	1.80125	2.21683	11.6984	2.217	74.3315	2.217	5.29485	2.21667	11.5811	2.217	3.925	2.217	35.368
2.225	2.5005	2.225	2.14785	2.22517	18.0099	2.22533	106.954	2.22533	6.78055	2.225	18.5322	2.22533	5.25955	2.22533	48.4121
2.23333	2.85895	2.23333	2.5046	2.2335	24.9621	2.23367	134.933	2.23367	8.1795	2.23333	26.6093	2.23367	6.73655	2.23367	60.1027
2.24167	3.16635	2.24167	2.83955	2.24183	31.484	2.242	156.236	2.242	9.30285	2.24167	34.5712	2.242	8.16915	2.242	69.0297
2.25	3.3824	2.25	3.1103	2.25017	36.6701	2.25033	169.129	2.25033	10.0321	2.25	41.2615	2.25033	9.375	2.25033	74.5926
2.25833	3.48925	2.25833	3.2934	2.2585	40.0387	2.25867	175.086	2.25867	10.3338	2.25833	45.9504	2.25867	10.2226	2.25867	76.8367
2.26667	3.487	2.26667	3.3784	2.26683	41.5074	2.267	175.751	2.267	10.242	2.26667	48.4134	2.267	10.6593	2.267	76.2103
2.275	3.3945	2.275	3.3735	2.27517	41.3088	2.27533	172.457	2.27533	9.8387	2.275	48.8154	2.27533	10.7092	2.27533	73.3182
2.28333	3.23365	2.28333	3.2922	2.2835	39.809	2.28367	166.265	2.28367	9.21995	2.28333	47.5474	2.28367	10.4337	2.28367	68.7793
2.29167	3.03055	2.29167	3.15775	2.29183	37.4136	2.292	157.999	2.292	8.4777	2.29167	45.0718	2.292	9.92155	2.292	63.2073
2.3	2.8104	2.3	2.9888	2.30017	34.474	2.30033	148.32	2.30033	7.69015	2.3	41.8278	2.30033	9.257	2.30033	57.1172
2.30833	2.59325	2.30833	2.8072	2.3085	31.2817	2.30867	137.736	2.30867	6.9087	2.30833	38.1836	2.30867	8.516	2.30867	50.9019
2.31667	2.38805	2.31667	2.6234	2.31683	28.0397	2.317	126.674	2.317	6.16705	2.31667	34.4042	2.317	7.7512	2.317	44.8588
2.325	2.20415	2.325	2.4439	2.32517	24.9027	2.32533	115.493	2.32533	5.48825	2.325	30.6806	2.32533	7.00235	2.32533	39.1832
2.33333	2.04195	2.33333	2.2831	2.3335	21.9638	2.33367	104.513	2.33367	4.87955	2.33333	27.1386	2.33367	6.3027	2.33367	33.9986
2.34167	1.9047	2.34167	2.1383	2.34183	19.2728	2.342	93.975	2.342	4.34465	2.34167	23.8773	2.342	5.6607	2.342	29.3641
2.35	1.78695	2.35	2.01035	2.35017	16.86	2.35033	84.0827	2.35033	3.8837	2.35	20.9334	2.35033	5.0849	2.35033	25.3132
2.35833	1.6883	2.35833	1.90065	2.3585	14.733	2.35867	74.9547	2.35867	3.4875	2.35833	18.2905	2.35867	4.5798	2.35867	21.8177
2.36667	1.60805	2.36667	1.80895	2.36683	12.8776	2.367	66.6737	2.367	3.1549	2.36667	15.9831	2.367	4.14055	2.367	18.8401
2.375	1.53815	2.375	1.7284	2.37517	11.2812	2.37533	59.2529	2.37533	2.87235	2.375	13.989	2.37533	3.7618	2.37533	16.3113
2.38333	1.4807	2.38333	1.6641	2.3835	9.9186	2.38367	52.684	2.38367	2.6343	2.38333	12.2802	2.38367	3.43665	2.38367	14.1832
2.39167	1.4349	2.39167	1.61015	2.39183	8.7612	2.392	46.9049	2.392	2.4358	2.39167	10.8303	2.392	3.16105	2.392	12.3859
2.4	1.3933	2.4	1.5618	2.40017	7.7808	2.40033	41.8554	2.40033	2.27025	2.4	9.59855	2.40033	2.9282	2.40033	10.8729
2.40833	1.35425	2.40833	1.5189	2.4085	6.9466	2.40867	37.4539	2.40867	2.13025	2.40833	8.553	2.40867	2.72905	2.40867	9.5992
2.41667	1.3157	2.41667	1.4795	2.41683	6.23975	2.417	33.6234	2.417	2.01295	2.41667	7.6671	2.417	2.56165	2.417	8.52955
2.425	1.28375	2.425	1.4422	2.42517	5.6313	2.42533	30.2762	2.42533	1.91405	2.425	6.913	2.42533	2.415	2.42533	7.62545
2.43333	1.2527	2.43333	1.4115	2.4335	5.11155	2.43367	27.3509	2.43367	1.8297	2.43333	6.2712	2.43367	2.29315	2.43367	6.86775
2.44167	1.22505	2.44167	1.38155	2.44183	4.6644	2.442	24.3246	2.442	1.75825	2.44167	5.7216	2.442	2.1884	2.442	6.2305
2.45	1.20055	2.45	1.35615	2.45017	4.2791	2.45033	21.8829	2.45033	1.6984	2.45	5.25175	2.45033	2.10295	2.45033	5.69635
2.45833	1.17785	2.45833	1.33395	2.4585	3.95065	2.45867	19.8862	2.45867	1.64595	2.45833	4.85005	2.45867	2.0297	2.45867	5.24165
2.46667	1.1583	2.46667	1.3118	2.46683	3.66765	2.467	18.147	2.467	1.6044	2.46667	4.50135	2.467	1.9687	2.467	4.8554
2.475	1.13695	2.475	1.28965	2.47517	3.42515	2.47533	16.6299	2.47533	1.569	2.475	4.20245	2.47533	1.91775	2.47533	4.5307
2.48333	1.1192	2.48333	1.2662	2.4835	3.21745	2.48367	15.3074	2.48367	1.53505	2.48333	3.94255	2.48367	1.87305	2.48367	4.2498
2.49167	1.1038	2.49167	1.2432	2.49183	3.0371	2.492	14.1512	2.492	1.5088	2.49167	3.71445	2.492	1.8349	2.492	4.00855
2.5	1.0839	2.5	1.21885	2.50017	2.88115	2.50033	13.1416	2.50033	1.4835	2.5	3.51425	2.50033	1.8006	2.50033	3.79685
2.50833	1.06925	2.50833	1.19255	2.5085	2.74085	2.50867	12.2539	2.50867	1.4609	2.50833	3.33335	2.50867	1.76605	2.50867	3.60875
2.51667	1.05175	2.51667	1.1651	2.51683	2.6173	2.517	11.4723	2.517	1.43895	2.51667	3.17285	2.517	1.73865	2.517	3.4402
2.525	1.0388	2.525	1.13955	2.52517	2.50765	2.52533	10.7805	2.52533	1.41815	2.525	3.02975	2.52533	1.7106	2.52533	3.2905
2.53333	1.0207	2.53333	1.11315	2.5335	2.40625	2.53367	10.1588	2.53367	1.3959	2.53333	2.896	2.53367	1.6809	2.53367	3.15535
2.54167	1.0058	2.54167	1.08935	2.54183	2.31315	2.542	9.60535	2.542	1.3791	2.54167	2.7734	2.542	1.6509	2.542	3.03815
2.55	0.97875	2.55	1.06185	2.55017	2.2276	2.55033	9.101	2.55033	1.36085	2.55	2.66135	2.55033	1.62145	2.55033	2.9289
2.55833	0.94835	2.55833	1.03835	2.5585	2.14385	2.55867	8.6416	2.55867	1.33985	2.55833	2.55345	2.55867	1.5895	2.55867	2.82715
2.56667	0.9197	2.56667	1.0166	2.56683	2.0659	2.567	8.22125	2.567	1.32	2.56667	2.4548	2.567	1.55605	2.567	2.72745
2.575	0.96185	2.575	0.99535	2.57517	1.9927	2.57533	7.83665	2.57533	1.3025	2.575	2.35785	2.57533	1.52225	2.57533	2.6312
2.58333	0.919	2.58333	0.97335	2.5835	1.92505	2.58367	7.47775	2.58367	1.28475	2.58333	2.2725	2.58367	1.4889	2.58367	2.53485
2.59167	0.91315	2.59167	0.9549	2.59183	1.85785	2.592	7.15125	2.592	1.26695	2.59167	2.18605	2.592	1.4557	2.592	2.4368
2.6	0.9038	2.6	0.9375	2.60017	1.79805	2.60033	6.84565	2.60033	1.2488	2.6	2.11045	2.60033	1.42385	2.60033	2.33955
2.60833	0.8924	2.60833	0.9236	2.6085	1.7425	2.60867	6.5619	2.60867	1.2333	2.60833	2.03945	2.60867	1.3955	2.60867	2.24315
2.61667	0.88775	2.61667	0.90955	2.61683	1.6917	2.617	6.30145	2.617	1.2163	2.61667	1.9805	2.617	1.3721	2.617	2.149
2.625	0.87755	2.625	0.89165	2.62517	1.64395	2.62533	6.0587	2.62533	1.19985	2.625	1.9244	2.62533	1.34955	2.62533	2.06255
2.63333	0.86705	2.63333	0.877	2.6335	1.5997	2.63367	5.8378	2.63367	1.1838	2.63333	1.88175	2.63367	1.3289	2.63367	1.9778
2.64167	0.85975	2.64167	0.8647	2.64183	1.5613	2.642	5.631	2.642	1.16815	2.64167	1.8473	2.642	1.3103	2.642	1.90065
2.65	0.8574	2.65	0.85785	2.65017	1.527	2.65033	5.43595	2.65033	1.15415	2.65	1.8229	2.65033	1.2971	2.65033	1.8297
2.65833	0.8592	2.65833	0.85505	2.6585	1.4969	2.65867	5.24755	2.65867	1.1395	2.65833	1.80055	2.65867	1.28545	2.65867	1.7647
2.66667	0.86125	2.66667	0.85305	2.66683	1.4686	2.667	5.06925	2.667	1.1265	2.66667	1.78415	2.667	1.276	2.667	1.7088
2.675	0.8615	2.675	0.85095	2.67517	1.4458	2.67533	4.8994	2.67533	1.1147	2.675	1.7616	2.67533	1.26485	2.67533	1.6608
2.68333	0.86155	2.68333	0.8468	2.6835	1.4228	2.68367	4.73505	2.68367	1.1046	2.68333	1.7397	2.68367	1.259	2.68367	1.618
2.69167	0.8603	2.69167	0.8419	2.69183	1.39865	2.692	4.57225	2.692	1.09335	2.69167	1.71055	2.692	1.2476	2.692	1.5799
2.7	0.85775	2.7	0.83705	2.70017	1.3784	2.70033	4.41715	2.70033	1.08315	2.7	1.67995	2.70033	1.23625	2.70033	1.54885
2.70833	0.8552	2.70833	0.83195	2.7085	1.3549	2.70867	4.2695	2.70867	1.07415	2.70833	1.64285	2.70867	1.223	2.70867	1.51845
2.71667	0.85825	2.71667	0.8329	2.71683	1.33465	2.717	4.1319	2.717	1.067	2.71667	1.61105	2.717	1.21495	2.717	1.48925
2.725	0.87705	2.725	0.8469	2.72517	1.3221	2.72533	4.0027	2.72533	1.0577	2.725	1.57975	2.72533	1.2097	2.72533	1.46065
2.73333	0.9407	2.73333	0.91365	2.7335	1.31435	2.73367	3.8847	2.73367	1.0541	2.73333	1.551	2.73367	1.20255	2.73367	1.43385
2.74167	0.8388	2.74167	0.8108	2.74183	1.3159	2.742	3.7783	2.742	1.04965	2.74167	1.52865	2.742	1.20845	2.742	1.4117
2.75	0.92335	2.75	0.89815	2.75017	1.3193	2.75033	3.68045	2.75033	1.05245	2.75	1.5122	2.75033	1.2152	2.75033	1.3949
2.75833	0.987	2.75833	0.96445	2.7585	1.3293	2.75867	3.59025	2.75867	1.0593	2.75833	1.50575	2.75867	1.22805	2.75867	1.3825
2.76667	1.01685	2.76667	1.00095	2.76683	1.35415	2.767	3.5092	2.767	1.07265	2.76667	1.51575	2.767	1.2579	2.767	1.37825
2.775	1.0488	2.775	1.03895	2.77517	1.3826	2.77533	3.4329	2.77533	1.08965	2.775	1.53145	2.77533	1.28945	2.77533	1.379
2.78333	1.0803	2.78333	1.08045	2.7835	1.4164	2.78367	3.35955	2.78367	1.11105	2.78333	1.5516	2.78367	1.32915	2.78367	1.3855
2.79167	1.11185	2.79167	1.119	2.79183	1.4539	2.792	3.29175	2.792	1.1355	2.79167	1.58075	2.792	1.372	2.792	1.39465
2.8	1.1376	2.8	1.15495	2.80017	1.49055	2.80033	3.22405	2.80033	1.16065	2.8	1.60975	2.80033	1.41425	2.80033	1.40765
2.80833	1.1543	2.80833	1.1838	2.8085	1.5223	2.80867	3.15795	2.80867	1.1859	2.80833	1.63735	2.80867	1.4542	2.80867	1.4206
2.81667	1.17035	2.81667	1.2079	2.81683	1.5497	2.817	3.096	2.817	1.2095	2.81667	1.6607	2.817	1.4892	2.817	1.43385
2.825	1.1776	2.825	1.2225	2.82517	1.57325	2.82533	3.03455	2.82533	1.232	2.825	1.6814	2.82533	1.5175	2.82533	1.4452
2.83333	1.18135	2.83333	1.235	2.8335	1.58845	2.83367	2.9731	2.83367	1.25055	2.83333	1.69745	2.83367	1.5435	2.83367	1.4541
2.84167	1.1772	2.84167	1.23885	2.84183	1.5977	2.842	2.91375	2.842	1.26435	2.84167	1.7096	2.842	1.56215	2.842	1.4586
2.85	1.17535	2.85	1.24105	2.85017	1.6065	2.85033	2.8633	2.85033	1.2737	2.85	1.7189	2.85033	1.5801	2.85033	1.45975
2.85833	1.16325	2.85833	1.2397	2.8585	1.61665	2.85867	2.8305	2.85867	1.2829	2.85833	1.7297	2.85867	1.59325	2.85867	1.4603
2.86667	1.15175	2.86667	1.2343	2.86683	1.63495	2.867	2.81105	2.867	1.28795	2.86667	1.74735	2.867	1.61355	2.867	1.4569
2.875	1.13625	2.875	1.22985	2.87517	1.6654	2.87533	2.81565	2.87533	1.29395	2.875	1.7817	2.87533	1.64065	2.87533	1.4525
2.88333	1.12155	2.88333	1.2232	2.8835	1.7162	2.88367	2.84435	2.88367	1.29895	2.88333	1.84055	2.88367	1.67985	2.88367	1.4501
2.89167	1.104	2.89167	1.21515	2.89183	1.78995	2.892	2.88785	2.892	1.30255	2.89167	1.9249	2.892	1.7344	2.892	1.4445
2.9	1.08435	2.9	1.2031	2.90017	1.87785	2.90033	2.9363	2.90033	1.31175	2.9	2.02975	2.90033	1.80065	2.90033	1.4454
2.90833	1.0666	2.90833	1.19325	2.9085	1.97225	2.90867	2.9799	2.90867	1.3297	2.90833	2.1476	2.90867	1.8725	2.90867	1.45725
2.91667	1.04805	2.91667	1.1828	2.91683	2.0591	2.917	3.0003	2.917	1.3615	2.91667	2.2563	2.917	1.9374	2.917	1.4857
2.925	1.03405	2.925	1.1754	2.92517	2.1284	2.92533	2.99925	2.92533	1.4062	2.925	2.3507	2.92533	1.9955	2.92533	1.53495
2.93333	1.02985	2.93333	1.17785	2.9335	2.1705	2.93367	2.9731	2.93367	1.46925	2.93333	2.40945	2.93367	2.03115	2.93367	1.6037
2.94167	1.0657	2.94167	1.2197	2.94183	2.18635	2.942	2.9279	2.942	1.53805	2.94167	2.43655	2.942	2.0478	2.942	1.68475
2.95	0.92595	2.95	1.0854	2.95017	2.182	2.95033	2.86825	2.95033	1.6068	2.95	2.43745	2.95033	2.0516	2.95033	1.77265
2.95833	0.9604	2.95833	1.1258	2.9585	2.1615	2.95867	2.801	2.95867	1.66925	2.95833	2.41705	2.95867	2.0429	2.95867	1.8487
2.96667	0.96035	2.96667	1.13045	2.96683	2.12965	2.967	2.7335	2.967	1.71665	2.96667	2.38115	2.967	2.0254	2.967	1.9065
2.975	0.93225	2.975	1.11015	2.97517	2.09525	2.97533	2.6658	2.97533	1.7476	2.975	2.33945	2.97533	2.00615	2.97533	1.9425
2.98333	0.9102	2.98333	1.0933	2.9835	2.05465	2.98367	2.60415	2.98367	1.7651	2.98333	2.2935	2.98367	1.9822	2.98367	1.95525
2.99167	0.8933	2.99167	1.0838	2.99183	2.01605	2.992	2.54015	2.992	1.77155	2.99167	2.24865	2.992	1.9594	2.992	1.9543
3	0.88055	3	1.07175	3.00017	1.9758	3.00033	2.48335	3.00033	1.76465	3	2.2027	3.00033	1.9341	3.00033	1.93825
3.00833	0.86555	3.00833	1.0636	3.0085	1.9408	3.00867	2.42865	3.00867	1.75535	3.00833	2.16235	3.00867	1.91335	3.00867	1.91105
3.01667	0.8504	3.01667	1.0653	3.01683	1.90745	3.017	2.37705	3.017	1.74115	3.01667	2.12715	3.017	1.8937	3.017	1.8816
3.025	0.83805	3.025	1.0436	3.02517	1.8753	3.02533	2.32725	3.02533	1.72705	3.025	2.0906	3.02533	1.87365	3.02533	1.8501
3.03333	0.825	3.03333	1.03145	3.0335	1.84475	3.03367	2.2798	3.03367	1.7114	3.03333	2.0573	3.03367	1.85335	3.03367	1.81525
3.04167	0.81345	3.04167	1.02255	3.04183	1.8173	3.042	2.23415	3.042	1.69835	3.04167	2.02625	3.042	1.8362	3.042	1.7844
3.05	0.8006	3.05	1.0114	3.05017	1.7903	3.05033	2.1898	3.05033	1.6841	3.05	1.99505	3.05033	1.8161	3.05033	1.756
3.05833	0.78825	3.05833	1.0005	3.0585	1.76295	3.05867	2.14235	3.05867	1.67145	3.05833	1.96555	3.05867	1.79985	3.05867	1.7271
3.06667	0.7781	3.06667	0.99095	3.06683	1.73675	3.067	2.10145	3.067	1.6599	3.06667	1.93675	3.067	1.78275	3.067	1.70355
3.075	0.76555	3.075	0.981	3.07517	1.71005	3.07533	2.0612	3.07533	1.64825	3.075	1.90555	3.07533	1.76255	3.07533	1.6798
3.08333	0.7569	3.08333	0.97095	3.0835	1.68455	3.08367	2.02295	3.08367	1.63935	3.08333	1.8782	3.08367	1.7446	3.08367	1.66235
3.09167	0.7451	3.09167	0.96105	3.09183	1.65975	3.092	1.98245	3.092	1.63075	3.09167	1.84905	3.092	1.7263	3.092	1.64315
3.1	0.73815	3.1	0.94935	3.10017	1.6365	3.10033	1.9502	3.10033	1.6209	3.1	1.823	3.10033	1.708	3.10033	1.62475
3.10833	0.72795	3.10833	0.9405	3.1085	1.61385	3.10867	1.91505	3.10867	1.611	3.10833	1.7968	3.10867	1.69015	3.10867	1.607
3.11667	0.718	3.11667	0.9286	3.11683	1.5931	3.117	1.8887	3.117	1.6038	3.11667	1.77515	3.117	1.67545	3.117	1.5919
3.125	0.709	3.125	0.91655	3.12517	1.5709	3.12533	1.8643	3.12533	1.59565	3.125	1.74965	3.12533	1.65655	3.12533	1.57595
3.13333	0.6975	3.13333	0.90505	3.1335	1.5507	3.13367	1.846	3.13367	1.58515	3.13333	1.72625	3.13367	1.6411	3.13367	1.5602
3.14167	0.6902	3.14167	0.8924	3.14183	1.5331	3.142	1.8293	3.142	1.5749	3.14167	1.70665	3.142	1.6246	3.142	1.54585
3.15	0.68235	3.15	0.8825	3.15017	1.51465	3.15033	1.81365	3.15033	1.56585	3.15	1.68755	3.15033	1.60975	3.15033	1.5317
3.15833	0.67385	3.15833	0.8709	3.1585	1.49445	3.15867	1.7984	3.15867	1.55595	3.15833	1.6665	3.15867	1.5916	3.15867	1.52355
3.16667	0.66525	3.16667	0.86	3.16683	1.47835	3.167	1.7824	3.167	1.5488	3.16667	1.64715	3.167	1.5797	3.167	1.52455
3.175	0.6598	3.175	0.85145	3.17517	1.45885	3.17533	1.7618	3.17533	1.54085	3.175	1.62975	3.17533	1.5631	3.17533	1.54985
3.18333	0.65035	3.18333	0.8399	3.1835	1.4416	3.18367	1.7382	3.18367	1.53515	3.18333	1.61075	3.18367	1.5477	3.18367	1.60765
3.19167	0.6404	3.19167	0.82815	3.19183	1.42445	3.192	1.7107	3.192	1.52955	3.19167	1.59395	3.192	1.53215	3.192	1.7113
3.2	0.63185	3.2	0.81685	3.20017	1.40745	3.20033	1.6818	3.20033	1.52555	3.2	1.58275	3.20033	1.5201	3.20033	1.8622
3.20833	0.6235	3.20833	0.8048	3.2085	1.39225	3.20867	1.65505	3.20867	1.51965	3.20833	1.57505	3.20867	1.50705	3.20867	2.0471
3.21667	0.61905	3.21667	0.7963	3.21683	1.3761	3.217	1.62925	3.217	1.51525	3.21667	1.57615	3.217	1.4975	3.217	2.24395
3.225	0.60885	3.225	0.7847	3.22517	1.36265	3.22533	1.6119	3.22533	1.51005	3.225	1.58785	3.22533	1.486	3.22533	2.4209
3.23333	0.6029	3.23333	0.77465	3.2335	1.3509	3.23367	1.59995	3.23367	1.50455	3.23333	1.6165	3.23367	1.47985	3.23367	2.55615
3.24167	0.5952	3.24167	0.7627	3.24183	1.34045	3.242	1.5957	3.242	1.49735	3.24167	1.65995	3.242	1.47645	3.242	2.63265
3.25	0.58875	3.25	0.75055	3.25017	1.33175	3.25033	1.59795	3.25033	1.48655	3.25	1.71835	3.25033	1.4753	3.25033	2.6515
3.25833	0.581	3.25833	0.7411	3.2585	1.324	3.25867	1.6091	3.25867	1.4793	3.25833	1.7859	3.25867	1.47365	3.25867	2.62315
3.26667	0.57235	3.26667	0.73175	3.26683	1.31615	3.267	1.6167	3.267	1.46075	3.26667	1.86315	3.267	1.47335	3.267	2.55445
3.275	0.5616	3.275	0.7221	3.27517	1.3088	3.27533	1.6276	3.27533	1.44605	3.275	1.9376	3.27533	1.4734	3.27533	2.4639
3.28333	0.5395	3.28333	0.71355	3.2835	1.30185	3.28367	1.6404	3.28367	1.4327	3.28333	2.00975	3.28367	1.4712	3.28367	2.35705
3.29167	0.54785	3.29167	0.7059	3.29183	1.2918	3.292	1.64625	3.292	1.4184	3.29167	2.0717	3.292	1.4676	3.292	2.24505
3.3	0.6331	3.3	0.6992	3.30017	1.2823	3.30033	1.65115	3.30033	1.40495	3.3	2.12835	3.30033	1.46515	3.30033	2.13355
3.30833	0.57635	3.30833	0.69145	3.3085	1.2728	3.30867	1.65275	3.30867	1.3912	3.30833	2.1727	3.30867	1.46135	3.30867	2.02635
3.31667	0.5337	3.31667	0.68285	3.31683	1.2629	3.317	1.649	3.317	1.37745	3.31667	2.21075	3.317	1.4554	3.317	1.92645
3.325	0.5414	3.325	0.67905	3.32517	1.25525	3.32533	1.64625	3.32533	1.36385	3.325	2.2409	3.32533	1.4518	3.32533	1.83685
3.33333	0.54045	3.33333	0.67575	3.3335	1.24395	3.33367	1.63945	3.33367	1.35445	3.33333	2.2647	3.33367	1.4431	3.33367	1.75685
3.34167	0.53735	3.34167	0.6725	3.34183	1.23555	3.342	1.63015	3.342	1.3444	3.34167	2.2859	3.342	1.43835	3.342	1.6853
3.35	0.53795	3.35	0.67065	3.35017	1.2258	3.35033	1.62135	3.35033	1.33675	3.35	2.301	3.35033	1.4332	3.35033	1.6265
3.35833	0.53665	3.35833	0.66685	3.3585	1.2165	3.35867	1.61305	3.35867	1.3321	3.35833	2.3119	3.35867	1.42785	3.35867	1.5764
3.36667	0.5363	3.36667	0.6639	3.36683	1.20985	3.367	1.5991	3.367	1.329	3.36667	2.3214	3.367	1.4221	3.367	1.5313
3.375	0.5334	3.375	0.6621	3.37517	1.20055	3.37533	1.58585	3.37533	1.3276	3.375	2.3296	3.37533	1.41715	3.37533	1.5006
3.38333	0.5334	3.38333	0.65855	3.3835	1.1898	3.38367	1.5753	3.38367	1.32665	3.38333	2.3319	3.38367	1.40915	3.38367	1.4747
3.39167	0.52995	3.39167	0.65305	3.39183	1.1835	3.392	1.5616	3.392	1.326	3.39167	2.33465	3.392	1.4023	3.392	1.45405
3.4	0.527	3.4	0.64885	3.40017	1.17125	3.40033	1.54715	3.40033	1.32465	3.4	2.334	3.40033	1.3939	3.40033	1.43625
3.40833	0.52295	3.40833	0.6439	3.4085	1.16535	3.40867	1.5341	3.40867	1.32305	3.40833	2.3346	3.40867	1.3874	3.40867	1.42075
3.41667	0.5183	3.41667	0.63685	3.41683	1.15355	3.417	1.52525	3.417	1.3205	3.41667	2.3326	3.417	1.3817	3.417	1.40725
3.425	0.51835	3.425	0.6363	3.42517	1.1446	3.42533	1.511	3.42533	1.31535	3.425	2.3285	3.42533	1.37115	3.42533	1.3919
3.43333	0.51275	3.43333	0.62995	3.4335	1.13495	3.43367	1.4993	3.43367	1.31185	3.43333	2.32555	3.43367	1.36665	3.43367	1.3802
3.44167	0.50955	3.44167	0.62535	3.44183	1.12615	3.442	1.4904	3.442	1.30285	3.44167	2.323	3.442	1.3562	3.442	1.36465
3.45	0.5081	3.45	0.62175	3.45017	1.1167	3.45033	1.4817	3.45033	1.29715	3.45	2.3186	3.45033	1.34855	3.45033	1.35255
3.45833	0.50285	3.45833	0.61715	3.4585	1.1102	3.45867	1.4728	3.45867	1.2895	3.45833	2.31545	3.45867	1.3422	3.45867	1.33695
3.46667	0.5025	3.46667	0.61365	3.46683	1.1009	3.467	1.4634	3.467	1.2805	3.46667	2.31165	3.467	1.33555	3.467	1.32325
3.475	0.4957	3.475	0.6057	3.47517	1.09425	3.47533	1.45495	3.47533	1.2734	3.475	2.3075	3.47533	1.3265	3.47533	1.3096
3.48333	0.49125	3.48333	0.5996	3.4835	1.0894	3.48367	1.44645	3.48367	1.26505	3.48333	2.30655	3.48367	1.32155	3.48367	1.29765
3.49167	0.4839	3.49167	0.5911	3.49183	1.0844	3.492	1.44115	3.492	1.25775	3.49167	2.30435	3.492	1.3163	3.492	1.28505
3.5	0.4811	3.5	0.58675	3.50017	1.07435	3.50033	1.43395	3.50033	1.25165	3.5	2.29725	3.50033	1.30765	3.50033	1.2729
3.50833	0.4759	3.50833	0.57955	3.5085	1.0691	3.50867	1.4244	3.50867	1.24115	3.50833	2.29385	3.50867	1.3016	3.50867	1.2614
3.51667	0.47125	3.51667	0.57235	3.51683	1.0615	3.517	1.42035	3.517	1.23365	3.51667	2.29015	3.517	1.29585	3.517	1.2498
3.525	0.4641	3.525	0.5652	3.52517	1.0548	3.52533	1.411	3.52533	1.2268	3.525	2.2861	3.52533	1.288	3.52533	1.23935
3.53333	0.46035	3.53333	0.5582	3.5335	1.0473	3.53367	1.40445	3.53367	1.21825	3.53333	2.28085	3.53367	1.28065	3.53367	1.2251
3.54167	0.4557	3.54167	0.55275	3.54183	1.03905	3.542	1.39495	3.542	1.21055	3.54167	2.27455	3.542	1.2718	3.542	1.21095
3.55	0.4506	3.55	0.54845	3.55017	1.03225	3.55033	1.3872	3.55033	1.20505	3.55	2.2706	3.55033	1.26515	3.55033	1.20735
3.55833	0.44665	3.55833	0.5426	3.5585	1.0222	3.55867	1.3788	3.55867	1.19805	3.55833	2.2637	3.55867	1.25735	3.55867	1.1981
3.56667	0.4395	3.56667	0.5383	3.56683	1.01645	3.567	1.3664	3.567	1.19355	3.56667	2.2585	3.567	1.25065	3.567	1.1912
3.575	0.4292	3.575	0.5324	3.57517	1.00665	3.57533	1.35925	3.57533	1.1854	3.575	2.25105	3.57533	1.2413	3.57533	1.18255
3.58333	0.4409	3.58333	0.5283	3.5835	0.9998	3.58367	1.34585	3.58367	1.17985	3.58333	2.2471	3.58367	1.23585	3.58367	1.1763
3.59167	0.43765	3.59167	0.5243	3.59183	0.9899	3.592	1.3351	3.592	1.17225	3.59167	2.24	3.592	1.2279	3.592	1.167
3.6	0.4598	3.6	0.519	3.60017	0.982	3.60033	1.32225	3.60033	1.1663	3.6	2.2351	3.60033	1.22115	3.60033	1.159
3.60833	0.4652	3.60833	0.5129	3.6085	0.97455	3.60867	1.3107	3.60867	1.15845	3.60833	2.22735	3.60867	1.2128	3.60867	1.1511
3.61667	0.3951	3.61667	0.50795	3.61683	0.969	3.617	1.2998	3.617	1.1538	3.61667	2.22005	3.617	1.20755	3.617	1.1467
3.625	0.40015	3.625	0.50305	3.62517	0.95905	3.62533	1.29045	3.62533	1.1487	3.625	2.2127	3.62533	1.20305	3.62533	1.13975
3.63333	0.40605	3.63333	0.49845	3.6335	0.9515	3.63367	1.27925	3.63367	1.14435	3.63333	2.20515	3.63367	1.19585	3.63367	1.1346
3.64167	0.40535	3.64167	0.49095	3.64183	0.9467	3.642	1.271	3.642	1.1384	3.64167	2.20075	3.642	1.19215	3.642	1.1294
3.65	0.40815	3.65	0.48795	3.65017	0.9414	3.65033	1.26085	3.65033	1.1333	3.65	2.20215	3.65033	1.18755	3.65033	1.12375
3.65833	0.405	3.65833	0.48455	3.6585	0.9338	3.65867	1.25095	3.65867	1.12945	3.65833	2.2017	3.65867	1.1807	3.65867	1.11965
3.66667	0.4026	3.66667	0.4804	3.66683	0.92665	3.667	1.24215	3.667	1.1245	3.66667	2.1897	3.667	1.1755	3.667	1.11335
3.675	0.40105	3.675	0.47705	3.67517	0.92105	3.67533	1.234	3.67533	1.1203	3.675	2.19015	3.67533	1.17065	3.67533	1.10915
3.68333	0.40075	3.68333	0.47725	3.6835	0.9158	3.68367	1.22605	3.68367	1.1167	3.68333	2.17605	3.68367	1.16535	3.68367	1.10485
3.69167	0.39985	3.69167	0.47755	3.69183	0.9098	3.692	1.21675	3.692	1.1144	3.69167	2.1656	3.692	1.15965	3.692	1.10105
3.7	0.40195	3.7	0.4742	3.70017	0.90375	3.70033	1.2073	3.70033	1.10985	3.7	2.1668	3.70033	1.15375	3.70033	1.0968
3.70833	0.4031	3.70833	0.476	3.7085	0.8998	3.70867	1.19875	3.70867	1.1065	3.70833	2.16425	3.70867	1.1492	3.70867	1.09135
3.71667	0.4032	3.71667	0.47275	3.71683	0.8949	3.717	1.1874	3.717	1.10325	3.71667	2.15805	3.717	1.1433	3.717	1.0878
3.725	0.40315	3.725	0.47535	3.72517	0.8885	3.72533	1.181	3.72533	1.09985	3.725	2.153	3.72533	1.13785	3.72533	1.08195
3.73333	0.4034	3.73333	0.4747	3.7335	0.88435	3.73367	1.17325	3.73367	1.09765	3.73333	2.1496	3.73367	1.1327	3.73367	1.0799
3.74167	0.40345	3.74167	0.4757	3.74183	0.8782	3.742	1.164	3.742	1.09765	3.74167	2.14235	3.742	1.12765	3.742	1.07685
3.75	0.4021	3.75	0.47395	3.75017	0.8733	3.75033	1.1571	3.75033	1.0948	3.75	2.13405	3.75033	1.1231	3.75033	1.073
3.75833	0.4017	3.75833	0.4721	3.7585	0.869	3.75867	1.1507	3.75867	1.09245	3.75833	2.1301	3.75867	1.1194	3.75867	1.07135
3.76667	0.40085	3.76667	0.47345	3.76683	0.8656	3.767	1.14295	3.767	1.0901	3.76667	2.12775	3.767	1.11645	3.767	1.06775
3.775	0.39895	3.775	0.47145	3.77517	0.864	3.77533	1.1364	3.77533	1.08595	3.775	2.12795	3.77533	1.115	3.77533	1.06505
3.78333	0.3986	3.78333	0.47095	3.7835	0.8623	3.78367	1.1315	3.78367	1.0828	3.78333	2.1239	3.78367	1.11335	3.78367	1.061
3.79167	0.3979	3.79167	0.4704	3.79183	0.86055	3.792	1.12355	3.792	1.0792	3.79167	2.1241	3.792	1.1137	3.792	1.0577
3.8	0.3945	3.8	0.467	3.80017	0.86365	3.80033	1.11875	3.80033	1.07505	3.8	2.12785	3.80033	1.1146	3.80033	1.052
3.80833	0.39295	3.80833	0.4649	3.8085	0.8667	3.80867	1.11465	3.80867	1.07255	3.80833	2.13595	3.80867	1.12	3.80867	1.0487
3.81667	0.38725	3.81667	0.46105	3.81683	0.87055	3.817	1.1119	3.817	1.07	3.81667	2.13995	3.817	1.12245	3.817	1.0472
3.825	0.384	3.825	0.4582	3.82517	0.8776	3.82533	1.10675	3.82533	1.0671	3.825	2.1486	3.82533	1.1281	3.82533	1.04495
3.83333	0.37875	3.83333	0.452	3.8335	0.883	3.83367	1.10345	3.83367	1.06395	3.83333	2.15405	3.83367	1.13235	3.83367	1.04095
3.84167	0.3765	3.84167	0.44885	3.84183	0.8894	3.842	1.09745	3.842	1.0621	3.84167	2.1606	3.842	1.1383	3.842	1.0392
3.85	0.37225	3.85	0.44355	3.85017	0.8952	3.85033	1.09325	3.85033	1.0579	3.85	2.16455	3.85033	1.1414	3.85033	1.03535
3.85833	0.3667	3.85833	0.44015	3.8585	0.8963	3.85867	1.08735	3.85867	1.055	3.85833	2.1648	3.85867	1.14155	3.85867	1.033
3.86667	0.36265	3.86667	0.43505	3.86683	0.8977	3.867	1.08325	3.867	1.0532	3.86667	2.16665	3.867	1.1444	3.867	1.02895
3.875	0.36095	3.875	0.42905	3.87517	0.8946	3.87533	1.07665	3.87533	1.05055	3.875	2.16415	3.87533	1.14305	3.87533	1.027
3.88333	0.3578	3.88333	0.42835	3.8835	0.8919	3.88367	1.07295	3.88367	1.0452	3.88333	2.15995	3.88367	1.142	3.88367	1.024
3.89167	0.3544	3.89167	0.4239	3.89183	0.8878	3.892	1.069	3.892	1.04375	3.89167	2.15335	3.892	1.13555	3.892	1.0205
3.9	0.3481	3.9	0.41745	3.90017	0.88255	3.90033	1.06555	3.90033	1.0396	3.9	2.1486	3.90033	1.1322	3.90033	1.017
3.90833	0.34785	3.90833	0.41675	3.9085	0.8769	3.90867	1.05935	3.90867	1.03835	3.90833	2.13955	3.90867	1.1277	3.90867	1.01215
3.91667	0.3448	3.91667	0.41185	3.91683	0.8713	3.917	1.05485	3.917	1.0348	3.91667	2.1315	3.917	1.12235	3.917	1.00865
3.925	0.34275	3.925	0.4077	3.92517	0.86485	3.92533	1.0507	3.92533	1.0312	3.925	2.12265	3.92533	1.11435	3.92533	1.0071
3.93333	0.33715	3.93333	0.4056	3.9335	0.8571	3.93367	1.04645	3.93367	1.0277	3.93333	2.11765	3.93367	1.107	3.93367	1.00185
3.94167	0.3344	3.94167	0.40495	3.94183	0.84845	3.942	1.0416	3.942	1.02485	3.94167	2.1033	3.942	1.0994	3.942	1.0007
3.95	0.3292	3.95	0.40255	3.95017	0.8416	3.95033	1.0372	3.95033	1.02105	3.95	2.09665	3.95033	1.0951	3.95033	0.9972
3.95833	0.32735	3.95833	0.40295	3.9585	0.83515	3.95867	1.03125	3.95867	1.0181	3.95833	2.08805	3.95867	1.0864	3.95867	0.9946
3.96667	0.32325	3.96667	0.3998	3.96683	0.82565	3.967	1.0265	3.967	1.01605	3.96667	2.07995	3.967	1.0806	3.967	0.99195
3.975	0.31865	3.975	0.39725	3.97517	0.81765	3.97533	1.0241	3.97533	1.01125	3.975	2.0711	3.97533	1.0749	3.97533	0.98855
3.98333	0.31525	3.98333	0.39625	3.9835	0.8142	3.98367	1.0189	3.98367	1.00995	3.98333	2.0652	3.98367	1.06665	3.98367	0.98795
3.99167	0.3105	3.99167	0.3916	3.99183	0.8063	3.992	1.0154	3.992	1.0087	3.99167	2.05005	3.992	1.06045	3.992	0.98535
4	0.31135	4	0.3906	4.00017	0.79985	4.00033	1.0102	4.00033	1.00535	4	2.0525	4.00033	1.05405	4.00033	0.986
4.00833	0.3083	4.00833	0.38615	4.0085	0.7935	4.00867	1.00665	4.00867	1.0026	4.00833	2.03935	4.00867	1.0492	4.00867	0.98615
4.01667	0.30885	4.01667	0.38645	4.01683	0.7887	4.017	1.00065	4.017	1.0014	4.01667	2.0326	4.017	1.0431	4.017	0.9877
4.025	0.3054	4.025	0.3814	4.02517	0.7843	4.02533	0.996801	4.02533	0.9983	4.025	2.02705	4.02533	1.04025	4.02533	0.9859
4.03333	0.30665	4.03333	0.3823	4.0335	0.77785	4.03367	0.992201	4.03367	0.9979	4.03333	2.0171	4.03367	1.0312	4.03367	0.98755
4.04167	0.3024	4.04167	0.3788	4.04183	0.7748	4.042	0.986701	4.042	1.00035	4.04167	2.01205	4.042	1.0278	4.042	0.98915
4.05	0.30405	4.05	0.37885	4.05017	0.7702	4.05033	0.982001	4.05033	0.9939	4.05	2.0069	4.05033	1.0229	4.05033	0.99175
4.05833	0.30385	4.05833	0.376	4.0585	0.76455	4.05867	0.975651	4.05867	0.992	4.05833	2.00335	4.05867	1.01865	4.05867	0.98805
4.06667	0.30165	4.06667	0.37155	4.06683	0.7601	4.067	0.971851	4.067	0.99085	4.06667	1.9945	4.067	1.0102	4.067	0.9887
4.075	0.3028	4.075	0.37335	4.07517	0.7579	4.07533	0.967201	4.07533	0.99045	4.075	1.99205	4.07533	1.0094	4.07533	0.9871
4.08333	0.29995	4.08333	0.37085	4.0835	0.7549	4.08367	0.962751	4.08367	0.9895	4.08333	1.98675	4.08367	1.00565	4.08367	0.9862
4.09167	0.2997	4.09167	0.36935	4.09183	0.75065	4.092	0.959451	4.092	0.98865	4.09167	1.98355	4.092	1.0028	4.092	0.9843
4.1	0.30135	4.1	0.3681	4.10017	0.7494	4.10033	0.959501	4.10033	0.9852	4.1	1.9782	4.10033	1.00065	4.10033	0.98085
4.10833	0.29955	4.10833	0.3681	4.1085	0.74865	4.10867	0.959451	4.10867	0.9857	4.10833	1.97865	4.10867	1.00105	4.10867	0.97955
4.11667	0.2982	4.11667	0.3676	4.11683	0.74875	4.117	0.961101	4.117	0.98595	4.11667	1.97345	4.117	1.00205	4.117	0.9767
4.125	0.30065	4.125	0.3696	4.12517	0.7489	4.12533	0.960701	4.12533	0.985	4.125	1.97195	4.12533	1.0024	4.12533	0.9743
4.13333	0.29745	4.13333	0.36675	4.1335	0.7503	4.13367	0.964251	4.13367	0.98425	4.13333	1.9714	4.13367	1.0032	4.13367	0.97075
4.14167	0.2977	4.14167	0.3671	4.14183	0.74995	4.142	0.964151	4.142	0.98385	4.14167	1.97115	4.142	1.00295	4.142	0.96725
4.15	0.2973	4.15	0.36825	4.15017	0.74905	4.15033	0.963601	4.15033	0.98145	4.15	1.96785	4.15033	1.0042	4.15033	0.96135
4.15833	0.29615	4.15833	0.36715	4.1585	0.75025	4.15867	0.961351	4.15867	0.9809	4.15833	1.9666	4.15867	1.0041	4.15867	0.9522
4.16667	0.2952	4.16667	0.3647	4.16683	0.7465	4.167	0.960501	4.167	0.98235	4.16667	1.96355	4.167	1.0026	4.167	0.9453
4.175	0.2943	4.175	0.36485	4.17517	0.74875	4.17533	0.958601	4.17533	0.9829	4.175	1.96285	4.17533	1.00285	4.17533	0.94005
4.18333	0.29365	4.18333	0.3659	4.1835	0.74535	4.18367	0.955751	4.18367	0.9834	4.18333	1.959	4.18367	1.00295	4.18367	0.9321
4.19167	0.2944	4.19167	0.3659	4.19183	0.74675	4.192	0.953701	4.192	0.98285	4.19167	1.9555	4.192	1.0006	4.192	0.9282
4.2	0.2918	4.2	0.3654	4.20017	0.74175	4.20033	0.950601	4.20033	0.98155	4.2	1.9513	4.20033	0.99705	4.20033	0.92925
4.20833	0.2921	4.20833	0.36715	4.2085	0.74005	4.20867	0.948451	4.20867	0.98155	4.20833	1.94845	4.20867	0.99445	4.20867	0.93235
4.21667	0.2897	4.21667	0.3649	4.21683	0.73855	4.217	0.943651	4.217	0.98175	4.21667	1.9444	4.217	0.99245	4.217	0.9391
4.225	0.2882	4.225	0.36355	4.22517	0.7353	4.22533	0.939801	4.22533	0.98215	4.225	1.9392	4.22533	0.9893	4.22533	0.9483
4.23333	0.28555	4.23333	0.36195	4.2335	0.7301	4.23367	0.935401	4.23367	0.98325	4.23333	1.933	4.23367	0.9848	4.23367	0.95875
4.24167	0.2868	4.24167	0.3626	4.24183	0.73035	4.242	0.933101	4.242	0.9821	4.24167	1.9315	4.242	0.9836	4.242	0.9657
4.25	0.2851	4.25	0.36285	4.25017	0.72455	4.25033	0.929551	4.25033	0.9817	4.25	1.9248	4.25033	0.97925	4.25033	0.97375
4.25833	0.28295	4.25833	0.36255	4.2585	0.72185	4.25867	0.925951	4.25867	0.97975	4.25833	1.91825	4.25867	0.9748	4.25867	0.98065
4.26667	0.28315	4.26667	0.36185	4.26683	0.7212	4.267	0.922501	4.267	0.98105	4.26667	1.91455	4.267	0.97425	4.267	0.98665
4.275	0.282	4.275	0.3623	4.27517	0.71875	4.27533	0.919851	4.27533	0.9803	4.275	1.9126	4.27533	0.97225	4.27533	0.98995
4.28333	0.28245	4.28333	0.36055	4.2835	0.71575	4.28367	0.914301	4.28367	0.98065	4.28333	1.90675	4.28367	0.9697	4.28367	0.9924
4.29167	0.2812	4.29167	0.3627	4.29183	0.71525	4.292	0.912051	4.292	0.97645	4.29167	1.9039	4.292	0.96935	4.292	0.99185
4.3	0.28225	4.3	0.36445	4.30017	0.71385	4.30033	0.909201	4.30033	0.97815	4.3	1.90205	4.30033	0.9689	4.30033	0.9947
4.30833	0.27975	4.30833	0.3629	4.3085	0.71035	4.30867	0.905601	4.30867	0.9766	4.30833	1.8954	4.30867	0.9645	4.30867	0.99515
4.31667	0.2787	4.31667	0.36365	4.31683	0.707	4.317	0.899251	4.317	0.9764	4.31667	1.89195	4.317	0.9639	4.317	0.99205
4.325	0.2765	4.325	0.35995	4.32517	0.7074	4.32533	0.896101	4.32533	0.9764	4.325	1.8898	4.32533	0.9609	4.32533	0.99025
4.33333	0.27455	4.33333	0.3595	4.3335	0.7031	4.33367	0.891601	4.33367	0.97645	4.33333	1.8858	4.33367	0.9593	4.33367	0.98985
4.34167	0.2732	4.34167	0.35955	4.34183	0.7013	4.342	0.889701	4.342	0.97315	4.34167	1.88185	4.342	0.95555	4.342	0.9846
4.35	0.27245	4.35	0.35875	4.35017	0.6982	4.35033	0.883851	4.35033	0.9733	4.35	1.878	4.35033	0.9526	4.35033	0.98165
4.35833	0.2693	4.35833	0.3565	4.3585	0.6965	4.35867	0.879051	4.35867	0.97245	4.35833	1.87275	4.35867	0.95	4.35867	0.9782
4.36667	0.2692	4.36667	0.357	4.36683	0.69525	4.367	0.873851	4.367	0.9713	4.36667	1.86995	4.367	0.9481	4.367	0.97745
4.375	0.2644	4.375	0.35505	4.37517	0.6922	4.37533	0.870151	4.37533	0.9697	4.375	1.8653	4.37533	0.94985	4.37533	0.97505
4.38333	0.26375	4.38333	0.35545	4.3835	0.6911	4.38367	0.868751	4.38367	0.9674	4.38333	1.8631	4.38367	0.94225	4.38367	0.9728
4.39167	0.26275	4.39167	0.35505	4.39183	0.6895	4.392	0.863951	4.392	0.9667	4.39167	1.8581	4.392	0.93935	4.392	0.96985
4.4	0.25835	4.4	0.35235	4.40017	0.6887	4.40033	0.860801	4.40033	0.9671	4.4	1.85395	4.40033	0.93775	4.40033	0.96755
4.40833	0.25755	4.40833	0.3521	4.4085	0.68665	4.40867	0.859001	4.40867	0.96735	4.40833	1.85085	4.40867	0.93565	4.40867	0.96635
4.41667	0.2557	4.41667	0.3507	4.41683	0.68715	4.417	0.853901	4.417	0.96585	4.41667	1.84825	4.417	0.93145	4.417	0.96415
4.425	0.254	4.425	0.3499	4.42517	0.6854	4.42533	0.850901	4.42533	0.96625	4.425	1.8456	4.42533	0.93105	4.42533	0.9631
4.43333	0.25325	4.43333	0.3497	4.4335	0.6837	4.43367	0.850051	4.43367	0.9676	4.43333	1.84125	4.43367	0.92765	4.43367	0.96015
4.44167	0.25215	4.44167	0.35025	4.44183	0.68285	4.442	0.846251	4.442	0.96605	4.44167	1.8393	4.442	0.92795	4.442	0.9587
4.45	0.2528	4.45	0.34765	4.45017	0.68125	4.45033	0.845301	4.45033	0.96505	4.45	1.83435	4.45033	0.9269	4.45033	0.95695
4.45833	0.25045	4.45833	0.34875	4.4585	0.6822	4.45867	0.842951	4.45867	0.963	4.45833	1.835	4.45867	0.9268	4.45867	0.955
4.46667	0.2482	4.46667	0.3476	4.46683	0.6804	4.467	0.839301	4.467	0.9623	4.46667	1.8301	4.467	0.92335	4.467	0.95315
4.475	0.2481	4.475	0.34535	4.47517	0.67875	4.47533	0.836801	4.47533	0.96195	4.475	1.8268	4.47533	0.92315	4.47533	0.951
4.48333	0.24675	4.48333	0.34535	4.4835	0.6774	4.48367	0.835051	4.48367	0.95955	4.48333	1.82385	4.48367	0.92085	4.48367	0.9483
4.49167	0.24485	4.49167	0.34565	4.49183	0.67675	4.492	0.831751	4.492	0.9629	4.49167	1.82225	4.492	0.91955	4.492	0.9487
4.5	0.24355	4.5	0.3455	4.50017	0.6764	4.50033	0.829751	4.50033	0.962	4.5	1.81845	4.50033	0.9191	4.50033	0.9472
4.50833	0.24335	4.50833	0.34515	4.5085	0.67535	4.50867	0.828351	4.50867	0.961	4.50833	1.81745	4.50867	0.91945	4.50867	0.94585
4.51667	0.24115	4.51667	0.3459	4.51683	0.6748	4.517	0.829201	4.517	0.95935	4.51667	1.81465	4.517	0.91575	4.517	0.94475
4.525	0.24005	4.525	0.3453	4.52517	0.6735	4.52533	0.827951	4.52533	0.9593	4.525	1.81355	4.52533	0.9149	4.52533	0.9419
4.53333	0.2422	4.53333	0.34815	4.5335	0.67285	4.53367	0.827801	4.53367	0.95865	4.53333	1.81135	4.53367	0.91515	4.53367	0.9414
4.54167	0.2432	4.54167	0.3513	4.54183	0.6719	4.542	0.829751	4.542	0.9561	4.54167	1.8101	4.542	0.9118	4.542	0.9408
4.55	0.24895	4.55	0.35395	4.55017	0.6723	4.55033	0.833551	4.55033	0.95475	4.55	1.8085	4.55033	0.912	4.55033	0.93925
4.55833	0.25575	4.55833	0.36275	4.5585	0.67255	4.55867	0.839951	4.55867	0.9566	4.55833	1.8075	4.55867	0.91205	4.55867	0.9411
4.56667	0.26875	4.56667	0.3781	4.56683	0.67335	4.567	0.851951	4.567	0.9553	4.56667	1.8067	4.567	0.9136	4.567	0.9412
4.575	0.2869	4.575	0.39785	4.57517	0.67195	4.57533	0.868601	4.57533	0.9533	4.575	1.804	4.57533	0.9091	4.57533	0.94345
4.58333	0.31185	4.58333	0.4233	4.5835	0.6773	4.58367	0.891301	4.58367	0.9554	4.58333	1.8034	4.58367	0.91195	4.58367	0.9436
4.59167	0.3429	4.59167	0.45875	4.59183	0.67695	4.592	0.915151	4.592	0.9551	4.59167	1.8027	4.592	0.91055	4.592	0.9512
4.6	0.3806	4.6	0.5022	4.60017	0.67845	4.60033	0.946101	4.60033	0.9551	4.6	1.80095	4.60033	0.90815	4.60033	0.9398
4.60833	0.42215	4.60833	0.54935	4.6085	0.679	4.60867	0.977001	4.60867	0.95615	4.60833	1.7998	4.60867	0.90605	4.60867	0.94285
4.61667	0.4631	4.61667	0.5973	4.61683	0.6821	4.617	1.00575	4.617	0.9565	4.61667	1.8005	4.617	0.9065	4.617	0.9436
4.625	0.51165	4.625	0.65	4.62517	0.68375	4.62533	1.03095	4.62533	0.95885	4.625	1.7979	4.62533	0.90585	4.62533	0.94495
4.63333	0.5636	4.63333	0.70875	4.6335	0.684	4.63367	1.0501	4.63367	0.95905	4.63333	1.7959	4.63367	0.9063	4.63367	0.94545
4.64167	0.62705	4.64167	0.77155	4.64183	0.68645	4.642	1.0614	4.642	0.9587	4.64167	1.79475	4.642	0.90655	4.642	0.94545
4.65	0.71175	4.65	0.85755	4.65017	0.6869	4.65033	1.06655	4.65033	0.9607	4.65	1.8026	4.65033	0.9063	4.65033	0.9452
4.65833	0.8234	4.65833	0.9638	4.6585	0.68245	4.65867	1.0659	4.65867	0.9595	4.65833	1.7905	4.65867	0.9031	4.65867	0.94405
4.66667	0.96015	4.66667	1.0978	4.66683	0.6841	4.667	1.05575	4.667	0.9602	4.66667	1.78575	4.667	0.90285	4.667	0.9449
4.675	1.1212	4.675	1.25895	4.67517	0.67985	4.67533	1.0432	4.67533	0.9622	4.675	1.78915	4.67533	0.9022	4.67533	0.94535
4.68333	1.2816	4.68333	1.42155	4.6835	0.67795	4.68367	1.0276	4.68367	0.9638	4.68333	1.78375	4.68367	0.90145	4.68367	0.94715
4.69167	1.4261	4.69167	1.5677	4.69183	0.6742	4.692	1.00865	4.692	0.96435	4.69167	1.7658	4.692	0.8989	4.692	0.9462
4.7	1.5365	4.7	1.72205	4.70017	0.67105	4.70033	0.989551	4.70033	0.9647	4.7	1.76835	4.70033	0.8971	4.70033	0.94695
4.70833	1.59635	4.70833	1.7978	4.7085	0.6692	4.70867	0.968301	4.70867	0.9668	4.70833	1.77215	4.70867	0.8976	4.70867	0.9492
4.71667	1.6002	4.71667	1.80175	4.71683	0.6666	4.717	0.953101	4.717	0.96845	4.71667	1.7689	4.717	0.8953	4.717	0.94825
4.725	1.5543	4.725	1.7651	4.72517	0.66295	4.72533	0.935601	4.72533	0.9699	4.725	1.76455	4.72533	0.89515	4.72533	0.94865
4.73333	1.47505	4.73333	1.7222	4.7335	0.66555	4.73367	0.919401	4.73367	0.97155	4.73333	1.7644	4.73367	0.89405	4.73367	0.95225
4.74167	1.37355	4.74167	1.6451	4.74183	0.66325	4.742	0.905451	4.742	0.97265	4.74167	1.76475	4.742	0.89675	4.742	0.9519
4.75	1.26425	4.75	1.53195	4.75017	0.6628	4.75033	0.894901	4.75033	0.97465	4.75	1.76155	4.75033	0.89655	4.75033	0.95385
4.75833	1.1512	4.75833	1.41615	4.7585	0.6637	4.75867	0.884201	4.75867	0.97465	4.75833	1.76275	4.75867	0.8993	4.75867	0.95585
4.76667	1.0442	4.76667	1.3057	4.76683	0.6641	4.767	0.877751	4.767	0.97695	4.76667	1.7618	4.767	0.89805	4.767	0.95675
4.775	0.94635	4.775	1.2017	4.77517	0.66615	4.77533	0.874051	4.77533	0.97805	4.775	1.7629	4.77533	0.9015	4.77533	0.95975
4.78333	0.8543	4.78333	1.1032	4.7835	0.66445	4.78367	0.875151	4.78367	0.9783	4.78333	1.7612	4.78367	0.8991	4.78367	0.9616
4.79167	0.76745	4.79167	1.0101	4.79183	0.663	4.792	0.878901	4.792	0.97935	4.79167	1.7611	4.792	0.8985	4.792	0.96265
4.8	0.6923	4.8	0.9289	4.80017	0.6678	4.80033	0.892001	4.80033	0.9785	4.8	1.7671	4.80033	0.90195	4.80033	0.96275
4.80833	0.62505	4.80833	0.8544	4.8085	0.66615	4.80867	0.908851	4.80867	0.98055	4.80833	1.75925	4.80867	0.9031	4.80867	0.96435
4.81667	0.56445	4.81667	0.7868	4.81683	0.66755	4.817	0.936951	4.817	0.97845	4.81667	1.76225	4.817	0.9036	4.817	0.96335
4.825	0.5137	4.825	0.73135	4.82517	0.66965	4.82533	0.964051	4.82533	0.98365	4.825	1.7594	4.82533	0.9069	4.82533	0.9645
4.83333	0.4738	4.83333	0.6831	4.8335	0.67155	4.83367	0.998451	4.83367	0.97525	4.83333	1.7594	4.83367	0.90775	4.83367	0.9647
4.84167	0.43755	4.84167	0.64145	4.84183	0.6736	4.842	1.03345	4.842	0.9766	4.84167	1.76045	4.842	0.91015	4.842	0.96585
4.85	0.4063	4.85	0.60685	4.85017	0.6773	4.85033	1.06545	4.85033	0.9767	4.85	1.75995	4.85033	0.9144	4.85033	0.96495
4.85833	0.3812	4.85833	0.57775	4.8585	0.68285	4.85867	1.09645	4.85867	0.98075	4.85833	1.76435	4.85867	0.92225	4.85867	0.9681
4.86667	0.3607	4.86667	0.5532	4.86683	0.68725	4.867	1.1168	4.867	0.9846	4.86667	1.76305	4.867	0.9244	4.867	0.9705
4.875	0.3418	4.875	0.5323	4.87517	0.69125	4.87533	1.1382	4.87533	0.986	4.875	1.7664	4.87533	0.9297	4.87533	0.9724
4.88333	0.3252	4.88333	0.51435	4.8835	0.6948	4.88367	1.1516	4.88367	0.99075	4.88333	1.76745	4.88367	0.9343	4.88367	0.97775
4.89167	0.3108	4.89167	0.5002	4.89183	0.6977	4.892	1.16695	4.892	0.99525	4.89167	1.76625	4.892	0.93775	4.892	0.98565
4.9	0.2993	4.9	0.4873	4.90017	0.70315	4.90033	1.19105	4.90033	1.001	4.9	1.7704	4.90033	0.94365	4.90033	0.9901
4.90833	0.28895	4.90833	0.4787	4.9085	0.7046	4.90867	1.24395	4.90867	1.0033	4.90833	1.76445	4.90867	0.94455	4.90867	0.9949
4.91667	0.28075	4.91667	0.47105	4.91683	0.70855	4.917	1.3362	4.917	1.0097	4.91667	1.7718	4.917	0.9477	4.917	1.0024
4.925	0.27585	4.925	0.4657	4.92517	0.7098	4.92533	1.4937	4.92533	1.01545	4.925	1.7689	4.92533	0.94895	4.92533	1.01095
4.93333	0.2704	4.93333	0.4641	4.9335	0.71405	4.93367	1.7386	4.93367	1.01865	4.93333	1.77225	4.93367	0.9557	4.93367	1.01825
4.94167	0.26555	4.94167	0.45965	4.94183	0.718	4.942	2.0863	4.942	1.0205	4.94167	1.7798	4.942	0.9633	4.942	1.02315
4.95	0.2627	4.95	0.4593	4.95017	0.724	4.95033	2.5504	4.95033	1.0212	4.95	1.7841	4.95033	0.97655	4.95033	1.0275
4.95833	0.2591	4.95833	0.46	4.9585	0.73885	4.95867	3.1185	4.95867	1.02235	4.95833	1.79555	4.95867	0.99725	4.95867	1.03105
4.96667	0.2589	4.96667	0.46065	4.96683	0.75625	4.967	3.76665	4.967	1.02295	4.96667	1.8173	4.967	1.02745	4.967	1.03315
4.975	0.25385	4.975	0.4597	4.97517	0.78845	4.97533	4.4426	4.97533	1.02055	4.975	1.84905	4.97533	1.07105	4.97533	1.0304
4.98333	0.2513	4.98333	0.46045	4.9835	0.83005	4.98367	5.0929	4.98367	1.01885	4.98333	1.8923	4.98367	1.1301	4.98367	1.03045
4.99167	0.2477	4.99167	0.45915	4.99183	0.88375	4.992	5.65175	4.992	1.01905	4.99167	1.94775	4.992	1.1995	4.992	1.02955
5	0.2439	5	0.46075	5.00017	0.9478	5.00033	6.0626	5.00033	1.0174	5	2.01325	5.00033	1.27835	5.00033	1.02765
5.00833	0.2423	5.00833	0.4622	5.0085	1.0158	5.00867	6.29935	5.00867	1.01445	5.00833	2.082	5.00867	1.36015	5.00867	1.02275
5.01667	0.24075	5.01667	0.4626	5.01683	1.0845	5.017	6.3524	5.017	1.0133	5.01667	2.15735	5.017	1.43945	5.017	1.02015
5.025	0.23365	5.025	0.46335	5.02517	1.149	5.02533	6.23745	5.02533	1.01295	5.025	2.2215	5.02533	1.5091	5.02533	1.01855
5.03333	0.2322	5.03333	0.46455	5.0335	1.19965	5.03367	5.9839	5.03367	1.01265	5.03333	2.27335	5.03367	1.55885	5.03367	1.01735
5.04167	0.2302	5.04167	0.4662	5.04183	1.2384	5.042	5.63995	5.042	1.01275	5.04167	2.3107	5.042	1.59055	5.042	1.0157
5.05	0.2278	5.05	0.4696	5.05017	1.2568	5.05033	5.23635	5.05033	1.01555	5.05	2.32985	5.05033	1.59995	5.05033	1.01575
5.05833	0.2278	5.05833	0.4725	5.0585	1.25865	5.05867	4.8162	5.05867	1.0193	5.05833	2.3281	5.05867	1.5904	5.05867	1.0175
5.06667	0.22725	5.06667	0.478	5.06683	1.24205	5.067	4.40175	5.067	1.02235	5.06667	2.31135	5.067	1.5627	5.067	1.02205
5.075	0.22435	5.075	0.48055	5.07517	1.21755	5.07533	4.00705	5.07533	1.0311	5.075	2.28625	5.07533	1.5269	5.07533	1.0304
5.08333	0.222	5.08333	0.48615	5.0835	1.18345	5.08367	3.64145	5.08367	1.0395	5.08333	2.25275	5.08367	1.48385	5.08367	1.0419
5.09167	0.22225	5.09167	0.49185	5.09183	1.1448	5.092	3.31055	5.092	1.05	5.09167	2.219	5.092	1.4397	5.092	1.05585
5.1	0.21985	5.1	0.49705	5.10017	1.104	5.10033	3.01765	5.10033	1.06455	5.1	2.18265	5.10033	1.39525	5.10033	1.07675
5.10833	0.21885	5.10833	0.50395	5.1085	1.069	5.10867	2.7631	5.10867	1.07975	5.10833	2.1511	5.10867	1.3561	5.10867	1.09975
5.11667	0.21555	5.11667	0.5108	5.11683	1.0343	5.117	2.54255	5.117	1.09585	5.11667	2.12255	5.117	1.3219	5.117	1.12355
5.125	0.21375	5.125	0.51615	5.12517	1.00765	5.12533	2.3523	5.12533	1.1106	5.125	2.1046	5.12533	1.2954	5.12533	1.1495
5.13333	0.2138	5.13333	0.52305	5.1335	0.98035	5.13367	2.19	5.13367	1.1241	5.13333	2.0856	5.13367	1.2683	5.13367	1.17505
5.14167	0.213	5.14167	0.5317	5.14183	0.9615	5.142	2.0483	5.142	1.1342	5.14167	2.0735	5.142	1.24975	5.142	1.1912
5.15	0.211	5.15	0.54185	5.15017	0.94085	5.15033	1.9278	5.15033	1.1401	5.15	2.06185	5.15033	1.2332	5.15033	1.203
5.15833	0.2103	5.15833	0.55035	5.1585	0.9288	5.15867	1.8176	5.15867	1.1478	5.15833	2.05415	5.15867	1.22035	5.15867	1.2109
5.16667	0.2108	5.16667	0.5621	5.16683	0.9157	5.167	1.7222	5.167	1.15735	5.16667	2.0454	5.167	1.20745	5.167	1.2137
5.175	0.20695	5.175	0.5733	5.17517	0.90835	5.17533	1.6333	5.17533	1.1785	5.175	2.03925	5.17533	1.19855	5.17533	1.21625
5.18333	0.20555	5.18333	0.58505	5.1835	0.8984	5.18367	1.5548	5.18367	1.2204	5.18333	2.02875	5.18367	1.18765	5.18367	1.2227
5.19167	0.202	5.19167	0.59695	5.19183	0.89025	5.192	1.48295	5.192	1.29095	5.19167	2.01595	5.192	1.17735	5.192	1.24075
5.2	0.2003	5.2	0.61155	5.20017	0.88245	5.20033	1.4182	5.20033	1.4092	5.2	2.00145	5.20033	1.1652	5.20033	1.27475
5.20833	0.2013	5.20833	0.6287	5.2085	0.87455	5.20867	1.3593	5.20867	1.58845	5.20833	1.9882	5.20867	1.155	5.20867	1.33955
5.21667	0.1991	5.21667	0.64645	5.21683	0.866	5.217	1.3094	5.217	1.8327	5.21667	1.97255	5.217	1.1438	5.217	1.4375
5.225	0.19795	5.225	0.66545	5.22517	0.86085	5.22533	1.26055	5.22533	2.1438	5.225	1.95945	5.22533	1.13595	5.22533	1.5779
5.23333	0.1966	5.23333	0.6854	5.2335	0.85365	5.23367	1.22005	5.23367	2.508	5.23333	1.9421	5.23367	1.1277	5.23367	1.7596
5.24167	0.19525	5.24167	0.713	5.24183	0.8466	5.242	1.1853	5.242	2.89995	5.24167	1.92755	5.242	1.1175	5.242	1.97405
5.25	0.19295	5.25	0.73725	5.25017	0.83925	5.25033	1.15325	5.25033	3.2794	5.25	1.91165	5.25033	1.1075	5.25033	2.19905
5.25833	0.1926	5.25833	0.77045	5.2585	0.83365	5.25867	1.1268	5.25867	3.6073	5.25833	1.897	5.25867	1.0995	5.25867	2.4164
5.26667	0.19195	5.26667	0.79835	5.26683	0.8283	5.267	1.1035	5.267	3.85425	5.26667	1.88555	5.267	1.0893	5.267	2.6055
5.275	0.19135	5.275	0.83805	5.27517	0.82295	5.27533	1.08525	5.27533	3.994	5.275	1.87325	5.27533	1.08355	5.27533	2.74185
5.28333	0.19085	5.28333	0.8763	5.2835	0.81935	5.28367	1.07005	5.28367	4.0233	5.28333	1.86175	5.28367	1.077	5.28367	2.81345
5.29167	0.1915	5.29167	0.9225	5.29183	0.81435	5.292	1.0553	5.292	3.9479	5.29167	1.8516	5.292	1.0673	5.292	2.8171
5.3	0.19145	5.3	0.9798	5.30017	0.81505	5.30033	1.0431	5.30033	3.7926	5.3	1.8474	5.30033	1.06585	5.30033	2.7639
5.30833	0.19435	5.30833	1.0635	5.3085	0.81495	5.30867	1.03325	5.30867	3.57965	5.30833	1.84085	5.30867	1.06285	5.30867	2.665
5.31667	0.19645	5.31667	1.22475	5.31683	0.81475	5.317	1.0212	5.317	3.3341	5.31667	1.8382	5.317	1.0616	5.317	2.53475
5.325	0.19935	5.325	1.58525	5.32517	0.81715	5.32533	1.0136	5.32533	3.078	5.325	1.8364	5.32533	1.0593	5.32533	2.3903
5.33333	0.2042	5.33333	2.36175	5.3335	0.81925	5.33367	1.0009	5.33367	2.83145	5.33333	1.8346	5.33367	1.0597	5.33367	2.2456
5.34167	0.2076	5.34167	3.79675	5.34183	0.8176	5.342	0.990851	5.342	2.5996	5.34167	1.83375	5.342	1.05715	5.342	2.10465
5.35	0.2116	5.35	6.0812	5.35017	0.8199	5.35033	0.981601	5.35033	2.3922	5.35	1.83045	5.35033	1.0557	5.35033	1.97555
5.35833	0.21875	5.35833	9.2359	5.3585	0.8209	5.35867	0.974251	5.35867	2.20865	5.35833	1.8282	5.35867	1.05515	5.35867	1.86125
5.36667	0.22615	5.36667	13.0645	5.36683	0.81855	5.367	0.965851	5.367	2.05	5.36667	1.82555	5.367	1.05455	5.367	1.7624
5.375	0.23515	5.375	17.2096	5.37517	0.8163	5.37533	0.959201	5.37533	1.9178	5.375	1.8235	5.37533	1.0523	5.37533	1.68005
5.38333	0.24515	5.38333	21.2449	5.3835	0.8146	5.38367	0.952751	5.38367	1.80255	5.38333	1.8175	5.38367	1.05095	5.38367	1.60615
5.39167	0.26735	5.39167	24.833	5.39183	0.8169	5.392	0.949851	5.392	1.70545	5.39167	1.81745	5.392	1.0519	5.392	1.5456
5.4	0.29135	5.4	27.7482	5.40017	0.8161	5.40033	0.945301	5.40033	1.628	5.4	1.81405	5.40033	1.05365	5.40033	1.49585
5.40833	0.33695	5.40833	29.9187	5.4085	0.8166	5.40867	0.943901	5.40867	1.561	5.40833	1.81245	5.40867	1.0549	5.40867	1.45465
5.41667	0.3956	5.41667	31.4228	5.41683	0.8183	5.417	0.938551	5.417	1.50425	5.41667	1.8099	5.417	1.05415	5.417	1.4155
5.425	0.46985	5.425	32.3792	5.42517	0.8196	5.42533	0.937001	5.42533	1.45975	5.425	1.8099	5.42533	1.05545	5.42533	1.3863
5.43333	0.55165	5.43333	32.9046	5.4335	0.82145	5.43367	0.933501	5.43367	1.4194	5.43333	1.80795	5.43367	1.05825	5.43367	1.35765
5.44167	0.6365	5.44167	33.1029	5.44183	0.8224	5.442	0.934401	5.442	1.38365	5.44167	1.806	5.442	1.0601	5.442	1.33285
5.45	0.7071	5.45	33.047	5.45017	0.82355	5.45033	0.936051	5.45033	1.35445	5.45	1.8047	5.45033	1.06105	5.45033	1.31065
5.45833	0.75855	5.45833	32.7786	5.4585	0.8264	5.45867	0.936201	5.45867	1.3287	5.45833	1.80605	5.45867	1.0651	5.45867	1.29305
5.46667	0.78505	5.46667	32.3302	5.46683	0.82755	5.467	0.937351	5.467	1.30665	5.46667	1.8041	5.467	1.06465	5.467	1.27615
5.475	0.78795	5.475	31.7373	5.47517	0.8305	5.47533	0.940201	5.47533	1.28765	5.475	1.8051	5.47533	1.06915	5.47533	1.262
5.48333	0.774	5.48333	31.0357	5.4835	0.83325	5.48367	0.940451	5.48367	1.27305	5.48333	1.8059	5.48367	1.0702	5.48367	1.2511
5.49167	0.74515	5.49167	30.2559	5.49183	0.8381	5.492	0.940101	5.492	1.2585	5.49167	1.80685	5.492	1.0754	5.492	1.24115
5.5	0.7142	5.5	29.4311	5.50017	0.8381	5.50033	0.942351	5.50033	1.2476	5.5	1.8066	5.50033	1.07835	5.50033	1.2345
5.50833	0.6823	5.50833	28.577	5.5085	0.8426	5.50867	0.941701	5.50867	1.2382	5.50833	1.81	5.50867	1.08325	5.50867	1.2285
5.51667	0.64855	5.51667	27.714	5.51683	0.8454	5.517	0.939651	5.517	1.2307	5.51667	1.81035	5.517	1.0849	5.517	1.2267
5.525	0.61795	5.525	26.848	5.52517	0.84795	5.52533	0.941551	5.52533	1.22465	5.525	1.81145	5.52533	1.0888	5.52533	1.22735
5.53333	0.58625	5.53333	25.9923	5.5335	0.85125	5.53367	0.938151	5.53367	1.2191	5.53333	1.8131	5.53367	1.0922	5.53367	1.2283
5.54167	0.55875	5.54167	25.1487	5.54183	0.8555	5.542	0.938201	5.542	1.2173	5.54167	1.8166	5.542	1.09775	5.542	1.2331
5.55	0.53275	5.55	24.3311	5.55017	0.86355	5.55033	0.939251	5.55033	1.21645	5.55	1.8219	5.55033	1.1044	5.55033	1.2392
5.55833	0.50825	5.55833	23.5238	5.5585	0.8677	5.55867	0.940101	5.55867	1.21465	5.55833	1.8218	5.55867	1.11055	5.55867	1.2471
5.56667	0.48795	5.56667	22.7396	5.56683	0.87215	5.567	0.943301	5.567	1.213	5.56667	1.82515	5.567	1.11555	5.567	1.25345
5.575	0.4687	5.575	21.9816	5.57517	0.87865	5.57533	0.944951	5.57533	1.21155	5.575	1.82935	5.57533	1.1219	5.57533	1.25915
5.58333	0.45145	5.58333	21.2496	5.5835	0.8863	5.58367	0.949851	5.58367	1.2099	5.58333	1.83495	5.58367	1.128	5.58367	1.26245
5.59167	0.436	5.59167	20.5448	5.59183	0.8949	5.592	0.953751	5.592	1.2132	5.59167	1.8423	5.592	1.137	5.592	1.2648
5.6	0.4235	5.6	19.8524	5.60017	0.90465	5.60033	0.957601	5.60033	1.2136	5.6	1.84695	5.60033	1.14575	5.60033	1.2643
5.60833	0.4102	5.60833	19.203	5.6085	0.91285	5.60867	0.959951	5.60867	1.2183	5.60833	1.8537	5.60867	1.15585	5.60867	1.2624
5.61667	0.39875	5.61667	18.5758	5.61683	0.92245	5.617	0.965001	5.617	1.2153	5.61667	1.8598	5.617	1.16395	5.617	1.2633
5.625	0.39	5.625	17.9784	5.62517	0.93185	5.62533	0.969401	5.62533	1.21995	5.625	1.8658	5.62533	1.17305	5.62533	1.26295
5.63333	0.38075	5.63333	17.4055	5.6335	0.9393	5.63367	0.976901	5.63367	1.2232	5.63333	1.8738	5.63367	1.184	5.63367	1.2608
5.64167	0.3722	5.64167	16.8632	5.64183	0.94895	5.642	0.979651	5.642	1.2262	5.64167	1.88205	5.642	1.19435	5.642	1.26195
5.65	0.36525	5.65	16.3409	5.65017	0.957	5.65033	0.981551	5.65033	1.23035	5.65	1.88815	5.65033	1.20295	5.65033	1.2625
5.65833	0.3589	5.65833	15.8418	5.6585	0.96755	5.65867	0.986401	5.65867	1.23455	5.65833	1.8933	5.65867	1.21455	5.65867	1.26355
5.66667	0.3509	5.66667	15.3673	5.66683	0.97515	5.667	0.989801	5.667	1.24	5.66667	1.90325	5.667	1.22515	5.667	1.26675
5.675	0.34635	5.675	14.9163	5.67517	0.9863	5.67533	0.995501	5.67533	1.24425	5.675	1.9146	5.67533	1.2377	5.67533	1.2675
5.68333	0.3419	5.68333	14.4893	5.6835	0.9954	5.68367	1.0024	5.68367	1.249	5.68333	1.91915	5.68367	1.25275	5.68367	1.2695
5.69167	0.33695	5.69167	14.0795	5.69183	1.00375	5.692	1.00875	5.692	1.2542	5.69167	1.92425	5.692	1.26595	5.692	1.27055
5.7	0.33345	5.7	13.6902	5.70017	1.0156	5.70033	1.01395	5.70033	1.2609	5.7	1.9359	5.70033	1.2819	5.70033	1.27275
5.70833	0.33085	5.70833	13.3239	5.7085	1.02435	5.70867	1.0238	5.70867	1.26675	5.70833	1.9429	5.70867	1.29625	5.70867	1.27475
5.71667	0.3247	5.71667	12.9705	5.71683	1.0324	5.717	1.03005	5.717	1.27475	5.71667	1.95145	5.717	1.30985	5.717	1.2775
5.725	0.32335	5.725	12.6411	5.72517	1.0446	5.72533	1.0414	5.72533	1.27835	5.725	1.9596	5.72533	1.3284	5.72533	1.2776
5.73333	0.3227	5.73333	12.3273	5.7335	1.0573	5.73367	1.05185	5.73367	1.2841	5.73333	1.9717	5.73367	1.3466	5.73367	1.279
5.74167	0.3211	5.74167	12.0264	5.74183	1.0732	5.742	1.06555	5.742	1.29015	5.74167	1.9848	5.742	1.37015	5.742	1.2803
5.75	0.3198	5.75	11.7421	5.75017	1.0848	5.75033	1.07635	5.75033	1.299	5.75	1.99435	5.75033	1.3892	5.75033	1.28525
5.75833	0.3172	5.75833	11.4737	5.7585	1.09905	5.75867	1.0926	5.75867	1.30525	5.75833	2.0075	5.75867	1.41335	5.75867	1.28615
5.76667	0.31215	5.76667	11.2198	5.76683	1.11725	5.767	1.10605	5.767	1.31435	5.76667	2.022	5.767	1.43745	5.767	1.29245
5.775	0.3099	5.775	10.9789	5.77517	1.1351	5.77533	1.122	5.77533	1.32265	5.775	2.03875	5.77533	1.4643	5.77533	1.29665
5.78333	0.3059	5.78333	10.7453	5.7835	1.15485	5.78367	1.13805	5.78367	1.33135	5.78333	2.05785	5.78367	1.49345	5.78367	1.30285
5.79167	0.3036	5.79167	10.5251	5.79183	1.17755	5.792	1.15525	5.792	1.34125	5.79167	2.0782	5.792	1.52665	5.792	1.3071
5.8	0.30115	5.8	10.3199	5.80017	1.20165	5.80033	1.1736	5.80033	1.34115	5.8	2.0995	5.80033	1.5598	5.80033	1.31465
5.80833	0.298	5.80833	10.1243	5.8085	1.22455	5.80867	1.18995	5.80867	1.36495	5.80833	2.1228	5.80867	1.59475	5.80867	1.32375
5.81667	0.29215	5.81667	9.94045	5.81683	1.252	5.817	1.2097	5.817	1.37575	5.81667	2.1473	5.817	1.6337	5.817	1.33135
5.825	0.2884	5.825	9.7667	5.82517	1.28185	5.82533	1.229	5.82533	1.3887	5.825	2.17585	5.82533	1.67575	5.82533	1.3414
5.83333	0.2876	5.83333	9.6039	5.8335	1.3131	5.83367	1.2478	5.83367	1.4016	5.83333	2.20615	5.83367	1.7224	5.83367	1.35285
5.84167	0.28175	5.84167	9.44605	5.84183	1.3482	5.842	1.26585	5.842	1.4152	5.84167	2.2388	5.842	1.77425	5.842	1.3596
5.85	0.28145	5.85	9.2992	5.85017	1.3813	5.85033	1.2857	5.85033	1.42025	5.85	2.2716	5.85033	1.82545	5.85033	1.36885
5.85833	0.27775	5.85833	9.1571	5.8585	1.4216	5.85867	1.31	5.85867	1.4196	5.85833	2.3048	5.85867	1.8821	5.85867	1.3804
5.86667	0.2719	5.86667	9.02165	5.86683	1.4612	5.867	1.33265	5.867	1.4702	5.86667	2.3424	5.867	1.9466	5.867	1.3886
5.875	0.26975	5.875	8.89135	5.87517	1.49695	5.87533	1.35995	5.87533	1.4857	5.875	2.37825	5.87533	2.0119	5.87533	1.39915
5.88333	0.26615	5.88333	8.7671	5.8835	1.53875	5.88367	1.39215	5.88367	1.48855	5.88333	2.41525	5.88367	2.08245	5.88367	1.41135
5.89167	0.2617	5.89167	8.65115	5.89183	1.5802	5.892	1.424	5.892	1.5045	5.89167	2.45275	5.892	2.16045	5.892	1.4239
5.9	0.2611	5.9	8.54245	5.90017	1.6233	5.90033	1.4617	5.90033	1.52275	5.9	2.49115	5.90033	2.24335	5.90033	1.43545
5.90833	0.25965	5.90833	8.43705	5.9085	1.66795	5.90867	1.5019	5.90867	1.5421	5.90833	2.5321	5.90867	2.3379	5.90867	1.44815
5.91667	0.2583	5.91667	8.34235	5.91683	1.7142	5.917	1.54815	5.917	1.5615	5.91667	2.57245	5.917	2.4386	5.917	1.46055
5.925	0.2576	5.925	8.24865	5.92517	1.76305	5.92533	1.5989	5.92533	1.58275	5.925	2.6184	5.92533	2.5525	5.92533	1.47495
5.93333	0.2536	5.93333	8.16215	5.9335	1.8166	5.93367	1.6487	5.93367	1.6069	5.93333	2.66595	5.93367	2.67645	5.93367	1.492
5.94167	0.2533	5.94167	8.08265	5.94183	1.86935	5.942	1.70235	5.942	1.6308	5.94167	2.7128	5.942	2.80785	5.942	1.5099
5.95	0.25155	5.95	8.00045	5.95017	1.92965	5.95033	1.76005	5.95033	1.65715	5.95	2.76885	5.95033	2.9563	5.95033	1.5338
5.95833	0.2497	5.95833	7.9293	5.9585	1.9901	5.95867	1.81625	5.95867	1.6846	5.95833	2.82445	5.95867	3.11255	5.95867	1.56105
5.96667	0.24815	5.96667	7.84105	5.96683	2.05385	5.967	1.8734	5.967	1.7136	5.96667	2.88475	5.967	3.2791	5.967	1.597
5.975	0.2475	5.975	7.82135	5.97517	2.1241	5.97533	1.93235	5.97533	1.74225	5.975	2.9464	5.97533	3.45395	5.97533	1.6417
5.98333	0.2462	5.98333	7.80105	5.9835	2.19725	5.98367	1.9913	5.98367	1.7783	5.98333	3.0149	5.98367	3.6352	5.98367	1.6995
5.99167	0.2435	5.99167	7.71	5.99183	2.27455	5.992	2.0571	5.992	1.81055	5.99167	3.0866	5.992	3.81705	5.992	1.76175
6	0.2418	6	7.63785	6.00017	2.35335	6.00033	2.1392	6.00033	1.8491	6	3.16025	6.00033	4.0005	6.00033	1.83395
6.00833	0.23775	6.00833	7.5937	6.0085	2.43595	6.00867	2.2536	6.00867	1.8892	6.00833	3.2385	6.00867	4.1822	6.00867	1.9083
6.01667	0.2386	6.01667	7.55495	6.01683	2.5213	6.017	2.4349	6.017	1.929	6.01667	3.31865	6.017	4.36495	6.017	1.9761
6.025	0.2364	6.025	7.51745	6.02517	2.61335	6.02533	2.7443	6.02533	1.97175	6.025	3.4075	6.02533	4.5441	6.02533	2.03545
6.03333	0.23585	6.03333	7.4808	6.0335	2.7177	6.03367	3.2716	6.03367	2.0172	6.03333	3.51185	6.03367	4.7427	6.03367	2.08005
6.04167	0.2379	6.04167	7.449	6.04183	2.8378	6.042	4.12125	6.042	2.06535	6.04167	3.6429	6.042	4.9642	6.042	2.1112
6.05	0.23985	6.05	7.4196	6.05017	3.0058	6.05033	5.3811	6.05033	2.1177	6.05	3.8351	6.05033	5.2535	6.05033	2.13275
6.05833	0.2465	6.05833	7.39425	6.0585	3.24825	6.05867	7.0967	6.05867	2.17215	6.05833	4.13745	6.05867	5.65965	6.05867	2.14375
6.06667	0.2563	6.06667	7.37685	6.06683	3.63405	6.067	9.26245	6.067	2.2314	6.06667	4.6315	6.067	6.2549	6.067	2.1515
6.075	0.27115	6.075	7.36525	6.07517	4.2371	6.07533	11.7921	6.07533	2.29215	6.075	5.41345	6.07533	7.12685	6.07533	2.1564
6.08333	0.2938	6.08333	7.36155	6.0835	5.1453	6.08367	14.5739	6.08367	2.35865	6.08333	6.57795	6.08367	8.3478	6.08367	2.16445
6.09167	0.3248	6.09167	7.36695	6.09183	6.43245	6.092	17.4531	6.092	2.4258	6.09167	8.19445	6.092	9.9583	6.092	2.17405
6.1	0.36205	6.1	7.38105	6.10017	8.1313	6.10033	20.2737	6.10033	2.49265	6.1	10.2706	6.10033	11.9528	6.10033	2.1898
6.10833	0.40975	6.10833	7.4059	6.1085	10.2278	6.10867	22.9039	6.10867	2.5593	6.10833	12.7629	6.10867	14.2721	6.10867	2.21265
6.11667	0.46525	6.11667	7.43725	6.11683	12.639	6.117	25.2358	6.117	2.65185	6.11667	15.5624	6.117	16.8138	6.117	2.24095
6.125	0.52395	6.125	7.47575	6.12517	15.2486	6.12533	27.2158	6.12533	2.76345	6.125	18.522	6.12533	19.435	6.12533	2.27275
6.13333	0.58385	6.13333	7.5144	6.1335	17.9096	6.13367	28.8107	6.13367	2.8558	6.13333	21.496	6.13367	22.0179	6.13367	2.311
6.14167	0.63935	6.14167	7.55455	6.14183	20.4844	6.142	30.031	6.142	2.9385	6.14167	24.3316	6.142	24.4311	6.142	2.35765
6.15	0.6841	6.15	7.5859	6.15017	22.846	6.15033	30.896	6.15033	3.04965	6.15	26.8923	6.15033	26.592	6.15033	2.4068
6.15833	0.7187	6.15833	7.6051	6.1585	24.9066	6.15867	31.4426	6.15867	3.1645	6.15833	29.1076	6.15867	28.4392	6.15867	2.461
6.16667	0.73605	6.16667	7.6129	6.16683	26.6149	6.167	31.7081	6.167	3.28375	6.16667	30.9388	6.167	29.9412	6.167	2.52055
6.175	0.7386	6.175	7.6069	6.17517	27.9546	6.17533	31.7396	6.17533	3.41255	6.175	32.3717	6.17533	31.0981	6.17533	2.58635
6.18333	0.6868	6.18333	7.58505	6.1835	28.937	6.18367	31.5708	6.18367	3.54495	6.18333	33.423	6.18367	31.9256	6.18367	2.65815
6.19167	0.75085	6.19167	7.5509	6.19183	29.5916	6.192	31.2555	6.192	3.6874	6.19167	34.1388	6.192	32.4526	6.192	2.73515
6.2	0.815	6.2	7.5076	6.20017	29.9561	6.20033	30.8179	6.20033	3.8356	6.2	34.541	6.20033	32.7156	6.20033	2.82005
6.20833	0.65335	6.20833	7.45985	6.2085	30.0665	6.20867	30.2641	6.20867	3.9915	6.20833	34.6675	6.20867	32.7425	6.20867	2.91345
6.21667	0.5744	6.21667	7.40435	6.21683	29.967	6.217	29.6535	6.217	4.1538	6.21667	34.5691	6.217	32.5735	6.217	3.01175
6.225	0.5292	6.225	7.3471	6.22517	29.6968	6.22533	29.0007	6.22533	4.3276	6.225	34.2765	6.22533	32.2448	6.22533	3.119
6.23333	0.4937	6.23333	7.2917	6.2335	29.2895	6.23367	28.3215	6.23367	4.5152	6.23333	33.8396	6.23367	31.7996	6.23367	3.22995
6.24167	0.45575	6.24167	7.2388	6.24183	28.7541	6.242	27.6306	6.242	4.7283	6.24167	33.2839	6.242	31.2604	6.242	3.3555
6.25	0.4225	6.25	7.19185	6.25017	28.1367	6.25033	26.9415	6.25033	4.98265	6.25	32.6437	6.25033	30.633	6.25033	3.49775
6.25833	0.39125	6.25833	7.1475	6.2585	27.467	6.25867	26.2465	6.25867	5.31895	6.25833	31.9434	6.25867	29.9592	6.25867	3.67355
6.26667	0.35915	6.26667	7.10485	6.26683	26.7574	6.267	25.5401	6.267	5.785	6.26667	31.206	6.267	29.2599	6.267	3.9155
6.275	0.33775	6.275	7.06975	6.27517	26.0257	6.27533	24.8179	6.27533	6.4572	6.275	30.4474	6.27533	28.5426	6.27533	4.2799
6.28333	0.31655	6.28333	7.0362	6.2835	25.2939	6.28367	24.0857	6.28367	7.4072	6.28333	29.682	6.28367	27.8187	6.28367	4.8505
6.29167	0.3002	6.29167	7.01135	6.29183	24.552	6.292	23.3386	6.292	8.7069	6.29167	28.9057	6.292	27.0962	6.292	5.73725
6.3	0.28455	6.3	6.9868	6.30017	23.8127	6.30033	22.5844	6.30033	10.3826	6.3	28.1273	6.30033	26.3637	6.30033	7.03425
6.30833	0.27225	6.30833	6.96775	6.3085	23.0724	6.30867	21.824	6.30867	12.4246	6.30833	27.3516	6.30867	25.6255	6.30867	8.81325
6.31667	0.26225	6.31667	6.9505	6.31683	22.3359	6.317	21.0703	6.317	14.7685	6.31667	26.5697	6.317	24.8761	6.317	11.0709
6.325	0.2518	6.325	6.93645	6.32517	21.6119	6.32533	20.3271	6.32533	17.2846	6.325	25.8073	6.32533	24.1329	6.32533	13.7295
6.33333	0.24545	6.33333	6.92905	6.3335	20.8955	6.33367	19.6033	6.33367	19.8276	6.33333	25.0308	6.33367	23.3865	6.33367	16.6316
6.34167	0.2387	6.34167	6.92175	6.34183	20.1938	6.342	18.9017	6.342	22.2693	6.34167	24.2535	6.342	22.6499	6.342	19.5877
6.35	0.2338	6.35	6.9144	6.35017	19.502	6.35033	18.2278	6.35033	24.5009	6.35	23.4855	6.35033	21.9198	6.35033	22.3987
6.35833	0.2277	6.35833	6.9109	6.3585	18.8335	6.35867	17.5768	6.35867	26.4339	6.35833	22.7358	6.35867	21.2068	6.35867	24.9134
6.36667	0.22175	6.36667	6.90865	6.36683	18.1806	6.367	16.9533	6.367	28.0422	6.36667	21.9953	6.367	20.5065	6.367	27.0204
6.375	0.21835	6.375	6.9072	6.37517	17.5526	6.37533	16.3646	6.37533	29.3087	6.375	21.2782	6.37533	19.8276	6.37533	28.681
6.38333	0.215	6.38333	6.9101	6.3835	16.9537	6.38367	15.8055	6.38367	30.2503	6.38333	20.5831	6.38367	19.1697	6.38367	29.9063
6.39167	0.21175	6.39167	6.91255	6.39183	16.3761	6.392	15.2638	6.392	30.8879	6.39167	19.9083	6.392	18.5333	6.392	30.7272
6.4	0.2091	6.4	6.91645	6.40017	15.821	6.40033	14.7459	6.40033	31.2306	6.4	19.2488	6.40033	17.9182	6.40033	31.2209
6.40833	0.20695	6.40833	6.9211	6.4085	15.293	6.40867	14.2584	6.40867	31.3528	6.40833	18.6181	6.40867	17.3296	6.40867	31.3992
6.41667	0.2063	6.41667	6.92355	6.41683	14.7933	6.417	13.7879	6.417	31.2791	6.41667	18.0114	6.417	16.7678	6.417	31.3367
6.425	0.20615	6.425	6.929	6.42517	14.3147	6.42533	13.3429	6.42533	31.0349	6.425	17.4296	6.42533	16.231	6.42533	31.0894
6.43333	0.2035	6.43333	6.93245	6.4335	13.8519	6.43367	12.9201	6.43367	30.6587	6.43333	16.8742	6.43367	15.7149	6.43367	30.6962
6.44167	0.20585	6.44167	6.9369	6.44183	13.415	6.442	12.5162	6.442	30.1714	6.44167	16.3449	6.442	15.2167	6.442	30.1836
6.45	0.206	6.45	6.93775	6.45017	13	6.45033	12.1267	6.45033	29.6005	6.45	15.8411	6.45033	14.749	6.45033	29.5924
6.45833	0.205	6.45833	6.94005	6.4585	12.6057	6.45867	11.7519	6.45867	28.9666	6.45833	15.3626	6.45867	14.3023	6.45867	28.9455
6.46667	0.2032	6.46667	6.9386	6.46683	12.2355	6.467	11.3924	6.467	28.3023	6.46667	14.9102	6.467	13.8819	6.467	28.2683
6.475	0.20265	6.475	6.9388	6.47517	11.8821	6.47533	11.0462	6.47533	27.6136	6.475	14.4798	6.47533	13.48	6.47533	27.5824
6.48333	0.20175	6.48333	6.93545	6.4835	11.5446	6.48367	10.7125	6.48367	26.9217	6.48333	14.0687	6.48367	13.0992	6.48367	26.929
6.49167	0.20065	6.49167	6.9315	6.49183	11.2228	6.492	10.3935	6.492	26.238	6.49167	13.6784	6.492	12.7362	6.492	26.3359
6.5	0.1992	6.5	6.9239	6.50017	10.9099	6.50033	10.0815	6.50033	25.5685	6.5	13.3046	6.50033	12.3822	6.50033	25.8201
6.50833	0.1973	6.50833	6.91555	6.5085	10.6126	6.50867	9.7851	6.50867	24.9098	6.50833	12.9534	6.50867	12.0492	6.50867	25.3871
6.51667	0.19635	6.51667	6.9043	6.51683	10.3258	6.517	9.4987	6.517	24.2253	6.51667	12.6157	6.517	11.7259	6.517	25.0225
6.525	0.1962	6.525	6.89365	6.52517	10.0501	6.52533	9.22225	6.52533	23.5257	6.525	12.2865	6.52533	11.4184	6.52533	24.6795
6.53333	0.195	6.53333	6.8758	6.5335	9.7819	6.53367	8.96015	6.53367	22.807	6.53333	11.9695	6.53367	11.1181	6.53367	24.3141
6.54167	0.1953	6.54167	6.85655	6.54183	9.5225	6.542	8.70635	6.542	22.0575	6.54167	11.6645	6.542	10.8322	6.542	23.8648
6.55	0.19395	6.55	6.83185	6.55017	9.2728	6.55033	8.46435	6.55033	21.2811	6.55	11.3667	6.55033	10.5564	6.55033	23.3026
6.55833	0.1949	6.55833	6.80645	6.5585	9.02855	6.55867	8.2339	6.55867	20.4898	6.55833	11.0798	6.55867	10.2877	6.55867	22.6025
6.56667	0.19395	6.56667	6.7749	6.56683	8.7957	6.567	8.01535	6.567	19.6883	6.56667	10.8045	6.567	10.0314	6.567	21.7692
6.575	0.1933	6.575	6.74025	6.57517	8.56615	6.57533	7.807	6.57533	18.8844	6.575	10.5373	6.57533	9.78185	6.57533	20.8314
6.58333	0.19115	6.58333	6.70225	6.5835	8.3488	6.58367	7.6026	6.58367	18.0936	6.58333	10.2759	6.58367	9.5419	6.58367	19.8389
6.59167	0.19055	6.59167	6.65875	6.59183	8.1339	6.592	7.4114	6.592	17.3254	6.59167	10.021	6.592	9.3103	6.592	18.8231
6.6	0.19265	6.6	6.6177	6.60017	7.92965	6.60033	7.2285	6.60033	16.5885	6.6	9.77735	6.60033	9.08655	6.60033	17.8179
6.60833	0.19535	6.60833	6.56875	6.6085	7.73485	6.60867	7.05415	6.60867	15.8849	6.60833	9.54285	6.60867	8.87615	6.60867	16.8609
6.61667	0.18995	6.61667	6.51455	6.61683	7.54285	6.617	6.88595	6.617	15.2119	6.61667	9.3152	6.617	8.67535	6.617	15.9685
6.625	0.1927	6.625	6.4581	6.62517	7.35755	6.62533	6.72585	6.62533	14.5715	6.625	9.09635	6.62533	8.4756	6.62533	15.1415
6.63333	0.1948	6.63333	6.3992	6.6335	7.1794	6.63367	6.5732	6.63367	13.9638	6.63333	8.8849	6.63367	8.2862	6.63367	14.3854
6.64167	0.19295	6.64167	6.3347	6.64183	7.01065	6.642	6.4263	6.642	13.3832	6.64167	8.6828	6.642	8.10485	6.642	13.6927
6.65	0.19605	6.65	6.27135	6.65017	6.84695	6.65033	6.2856	6.65033	12.8308	6.65	8.48895	6.65033	7.93155	6.65033	13.0541
6.65833	0.19465	6.65833	6.2025	6.6585	6.68945	6.65867	6.14835	6.65867	12.3026	6.65833	8.30245	6.65867	7.7642	6.65867	12.4599
6.66667	0.1955	6.66667	6.13	6.66683	6.5413	6.667	6.01595	6.667	11.8074	6.66667	8.1239	6.667	7.6061	6.667	11.9038
6.675	0.19495	6.675	6.05295	6.67517	6.39515	6.67533	5.88875	6.67533	11.3399	6.675	7.95055	6.67533	7.45325	6.67533	11.3863
6.68333	0.1951	6.68333	5.9768	6.6835	6.2544	6.68367	5.76395	6.68367	10.9069	6.68333	7.7857	6.68367	7.3067	6.68367	10.8986
6.69167	0.1927	6.69167	5.8943	6.69183	6.1204	6.692	5.64405	6.692	10.5071	6.69167	7.6271	6.692	7.16455	6.692	10.4404
6.7	0.1933	6.7	5.81455	6.70017	5.991	6.70033	5.5279	6.70033	10.1477	6.7	7.4791	6.70033	7.02775	6.70033	10.009
6.70833	0.1922	6.70833	5.7309	6.7085	5.869	6.70867	5.4148	6.70867	9.8314	6.70833	7.33635	6.70867	6.897	6.70867	9.60355
6.71667	0.19275	6.71667	5.64845	6.71683	5.74355	6.717	5.3039	6.717	9.57125	6.71667	7.19155	6.717	6.76715	6.717	9.2267
6.725	0.18615	6.725	5.5562	6.72517	5.6293	6.72533	5.1964	6.72533	9.37345	6.725	7.05725	6.72533	6.64465	6.72533	8.87595
6.73333	0.18445	6.73333	5.47125	6.7335	5.51855	6.73367	5.0934	6.73367	9.24345	6.73333	6.931	6.73367	6.528	6.73367	8.55315
6.74167	0.1778	6.74167	5.38105	6.74183	5.41235	6.742	4.993	6.742	9.1863	6.74167	6.80765	6.742	6.41695	6.742	8.261
6.75	0.2009	6.75	5.29355	6.75017	5.311	6.75033	4.89505	6.75033	9.195	6.75	6.6909	6.75033	6.30985	6.75033	7.9932
6.75833	0.18015	6.75833	5.2056	6.7585	5.21455	6.75867	4.80635	6.75867	9.26165	6.75833	6.5791	6.75867	6.20835	6.75867	7.7481
6.76667	0.1832	6.76667	5.11635	6.76683	5.12105	6.767	4.7176	6.767	9.37145	6.76667	6.47365	6.767	6.11135	6.767	7.525
6.775	0.18475	6.775	5.0305	6.77517	5.03385	6.77533	4.6319	6.77533	9.50105	6.775	6.3707	6.77533	6.019	6.77533	7.31205
6.78333	0.18705	6.78333	4.94495	6.7835	4.95425	6.78367	4.54915	6.78367	9.62875	6.78333	6.27085	6.78367	5.93215	6.78367	7.11155
6.79167	0.18965	6.79167	4.8622	6.79183	4.8755	6.792	4.46835	6.792	9.7294	6.79167	6.175	6.792	5.8501	6.792	6.9146
6.8	0.2019	6.8	4.7849	6.80017	4.8043	6.80033	4.3904	6.80033	9.77785	6.8	6.07895	6.80033	5.772	6.80033	6.7226
6.80833	0.2158	6.80833	4.7147	6.8085	4.72965	6.80867	4.3154	6.80867	9.75845	6.80833	5.9852	6.80867	5.69245	6.80867	6.53215
6.81667	0.24025	6.81667	4.651	6.81683	4.6615	6.817	4.244	6.817	9.6569	6.81667	5.8963	6.817	5.61595	6.817	6.338
6.825	0.2724	6.825	4.59505	6.82517	4.59215	6.82533	4.17255	6.82533	9.4737	6.825	5.8172	6.82533	5.53995	6.82533	6.14545
6.83333	0.31625	6.83333	4.55335	6.8335	4.5246	6.83367	4.107	6.83367	9.2137	6.83333	5.73725	6.83367	5.4628	6.83367	5.95455
6.84167	0.36835	6.84167	4.51915	6.84183	4.45635	6.842	4.0409	6.842	8.8882	6.84167	5.66835	6.842	5.38855	6.842	5.76335
6.85	0.42375	6.85	4.4884	6.85017	4.39005	6.85033	3.97725	6.85033	8.5159	6.85	5.6051	6.85033	5.31355	6.85033	5.57955
6.85833	0.473	6.85833	4.4528	6.8585	4.3223	6.85867	3.9185	6.85867	8.10655	6.85833	5.5457	6.85867	5.23885	6.85867	5.4029
6.86667	0.51265	6.86667	4.41055	6.86683	4.2548	6.867	3.86215	6.867	7.6811	6.86667	5.4918	6.867	5.168	6.867	5.23495
6.875	0.53525	6.875	4.35225	6.87517	4.1858	6.87533	3.8052	6.87533	7.25755	6.875	5.43485	6.87533	5.09335	6.87533	5.0788
6.88333	0.53885	6.88333	4.27885	6.8835	4.1193	6.88367	3.7503	6.88367	6.84115	6.88333	5.37605	6.88367	5.022	6.88367	4.9304
6.89167	0.52585	6.89167	4.1909	6.89183	4.0529	6.892	3.69585	6.892	6.44085	6.89167	5.31335	6.892	4.95245	6.892	4.79105
6.9	0.4984	6.9	4.09385	6.90017	3.9911	6.90033	3.64365	6.90033	6.0667	6.9	5.24785	6.90033	4.8853	6.90033	4.6588
6.90833	0.4633	6.90833	3.9882	6.9085	3.9256	6.90867	3.5929	6.90867	5.72295	6.90833	5.1752	6.90867	4.81595	6.90867	4.5324
6.91667	0.4213	6.91667	3.88065	6.91683	3.8651	6.917	3.5444	6.917	5.4125	6.91667	5.10175	6.917	4.74865	6.917	4.40805
6.925	0.3814	6.925	3.77595	6.92517	3.80395	6.92533	3.49465	6.92533	5.1237	6.925	5.02965	6.92533	4.6858	6.92533	4.287
6.93333	0.3453	6.93333	3.6746	6.9335	3.74615	6.93367	3.4488	6.93367	4.8699	6.93333	4.9551	6.93367	4.6219	6.93367	4.1685
6.94167	0.31395	6.94167	3.581	6.94183	3.68895	6.942	3.40275	6.942	4.64345	6.94167	4.883	6.942	4.56065	6.942	4.0519
6.95	0.2849	6.95	3.49205	6.95017	3.63395	6.95033	3.3606	6.95033	4.4403	6.95	4.81035	6.95033	4.4997	6.95033	3.93925
6.95833	0.2637	6.95833	3.411	6.9585	3.57815	6.95867	3.3168	6.95867	4.26005	6.95833	4.73865	6.95867	4.4392	6.95867	3.83305
6.96667	0.2423	6.96667	3.33405	6.96683	3.52525	6.967	3.27335	6.967	4.095	6.96667	4.6685	6.967	4.3816	6.967	3.728
6.975	0.22805	6.975	3.26065	6.97517	3.47415	6.97533	3.2329	6.97533	3.94835	6.975	4.6022	6.97533	4.32675	6.97533	3.62745
6.98333	0.21425	6.98333	3.19275	6.9835	3.42815	6.98367	3.19235	6.98367	3.8185	6.98333	4.5378	6.98367	4.27215	6.98367	3.5341
6.99167	0.20505	6.99167	3.1294	6.99183	3.37935	6.992	3.1553	6.992	3.6991	6.99167	4.4749	6.992	4.22175	6.992	3.445
7	0.19925	7	3.0684	7.00017	3.334	7.00033	3.1193	7.00033	3.59255	7	4.4147	7.00033	4.17055	7.00033	3.36135
7.00833	0.192	7.00833	3.0091	7.0085	3.28925	7.00867	3.0858	7.00867	3.4944	7.00833	4.35685	7.00867	4.1215	7.00867	3.28475
7.01667	0.18795	7.01667	2.95525	7.01683	3.2467	7.017	3.0536	7.017	3.4014	7.01667	4.30195	7.017	4.07355	7.017	3.2086
7.025	0.18585	7.025	2.90645	7.02517	3.20605	7.02533	3.02155	7.02533	3.3185	7.025	4.2488	7.02533	4.02865	7.02533	3.13875
7.03333	0.1837	7.03333	2.8519	7.0335	3.1647	7.03367	2.9905	7.03367	3.23855	7.03333	4.19665	7.03367	3.9827	7.03367	3.07
7.04167	0.17875	7.04167	2.8007	7.04183	3.1272	7.042	2.962	7.042	3.1672	7.04167	4.14645	7.042	3.93945	7.042	3.00455
7.05	0.1795	7.05	2.75485	7.05017	3.09245	7.05033	2.9366	7.05033	3.0984	7.05	4.1006	7.05033	3.90125	7.05033	2.9388
7.05833	0.17755	7.05833	2.70945	7.0585	3.0565	7.05867	2.91455	7.05867	3.034	7.05833	4.0541	7.05867	3.8607	7.05867	2.8796
7.06667	0.1755	7.06667	2.6656	7.06683	3.0198	7.067	2.89315	7.067	2.97195	7.06667	4.0116	7.067	3.82325	7.067	2.819
7.075	0.1779	7.075	2.6249	7.07517	2.98655	7.07533	2.8729	7.07533	2.91465	7.075	3.96955	7.07533	3.78745	7.07533	2.76295
7.08333	0.1762	7.08333	2.5819	7.0835	2.95585	7.08367	2.8581	7.08367	2.85875	7.08333	3.93625	7.08367	3.7582	7.08367	2.70725
7.09167	0.1758	7.09167	2.5432	7.09183	2.9285	7.092	2.84535	7.092	2.8058	7.09167	3.90015	7.092	3.73135	7.092	2.6535
7.1	0.17455	7.1	2.50345	7.10017	2.8972	7.10033	2.8323	7.10033	2.7549	7.1	3.86845	7.10033	3.7027	7.10033	2.6009
7.10833	0.17495	7.10833	2.46325	7.1085	2.87225	7.10867	2.82265	7.10867	2.706	7.10833	3.84195	7.10867	3.6823	7.10867	2.5501
7.11667	0.1739	7.11667	2.42695	7.11683	2.8461	7.117	2.81175	7.117	2.66165	7.11667	3.8149	7.117	3.66115	7.117	2.5043
7.125	0.1732	7.125	2.39075	7.12517	2.82105	7.12533	2.8013	7.12533	2.61985	7.125	3.7901	7.12533	3.6391	7.12533	2.46085
7.13333	0.1722	7.13333	2.35595	7.1335	2.79545	7.13367	2.78855	7.13367	2.57665	7.13333	3.76415	7.13367	3.61575	7.13367	2.41975
7.14167	0.1715	7.14167	2.32005	7.14183	2.77075	7.142	2.7704	7.142	2.53715	7.14167	3.74165	7.142	3.59125	7.142	2.38665
7.15	0.1734	7.15	2.29045	7.15017	2.7439	7.15033	2.74945	7.15033	2.4979	7.15	3.7139	7.15033	3.56445	7.15033	2.3543
7.15833	0.171	7.15833	2.2582	7.1585	2.7168	7.15867	2.72145	7.15867	2.46065	7.15833	3.68455	7.15867	3.5339	7.15867	2.3223
7.16667	0.16975	7.16667	2.2249	7.16683	2.6897	7.167	2.693	7.167	2.4224	7.16667	3.65355	7.167	3.5007	7.167	2.2921
7.175	0.16995	7.175	2.1947	7.17517	2.66205	7.17533	2.6617	7.17533	2.39255	7.175	3.61965	7.17533	3.46795	7.17533	2.26465
7.18333	0.16855	7.18333	2.16285	7.1835	2.6333	7.18367	2.6287	7.18367	2.3525	7.18333	3.5852	7.18367	3.43025	7.18367	2.2403
7.19167	0.16665	7.19167	2.1328	7.19183	2.60305	7.192	2.59435	7.192	2.3208	7.19167	3.54885	7.192	3.3941	7.192	2.2149
7.2	0.1669	7.2	2.1045	7.20017	2.5744	7.20033	2.5588	7.20033	2.29035	7.2	3.51315	7.20033	3.35685	7.20033	2.19335
7.20833	0.16645	7.20833	2.0773	7.2085	2.54475	7.20867	2.5235	7.20867	2.2586	7.20833	3.47425	7.20867	3.31775	7.20867	2.17225
7.21667	0.16565	7.21667	2.0499	7.21683	2.51615	7.217	2.49125	7.217	2.2305	7.21667	3.43515	7.217	3.281	7.217	2.15655
7.225	0.1678	7.225	2.02515	7.22517	2.488	7.22533	2.4567	7.22533	2.202	7.225	3.40105	7.22533	3.24575	7.22533	2.14005
7.23333	0.1673	7.23333	1.99775	7.2335	2.46075	7.23367	2.42455	7.23367	2.17625	7.23333	3.36545	7.23367	3.2112	7.23367	2.12605
7.24167	0.16645	7.24167	1.9737	7.24183	2.43485	7.242	2.39365	7.242	2.1495	7.24167	3.33025	7.242	3.1786	7.242	2.1136
7.25	0.1653	7.25	1.9474	7.25017	2.40925	7.25033	2.36525	7.25033	2.12395	7.25	3.2943	7.25033	3.14555	7.25033	2.1041
7.25833	0.1653	7.25833	1.92545	7.2585	2.38185	7.25867	2.3371	7.25867	2.10065	7.25833	3.25885	7.25867	3.1137	7.25867	2.0934
7.26667	0.16635	7.26667	1.90385	7.26683	2.36	7.267	2.31225	7.267	2.0752	7.26667	3.23095	7.267	3.08465	7.267	2.08085
7.275	0.1646	7.275	1.87995	7.27517	2.3347	7.27533	2.28775	7.27533	2.0531	7.275	3.19535	7.27533	3.0553	7.27533	2.0658
7.28333	0.16475	7.28333	1.8577	7.2835	2.3116	7.28367	2.26285	7.28367	2.0313	7.28333	3.16995	7.28367	3.0274	7.28367	2.04925
7.29167	0.1654	7.29167	1.83515	7.29183	2.29065	7.292	2.2405	7.292	2.0095	7.29167	3.15835	7.292	3.00195	7.292	2.02805
7.3	0.16525	7.3	1.81505	7.30017	2.26855	7.30033	2.21725	7.30033	1.9895	7.3	3.11095	7.30033	2.97565	7.30033	2.0049
7.30833	0.16425	7.30833	1.79465	7.3085	2.24685	7.30867	2.19555	7.30867	1.97115	7.30833	3.1029	7.30867	2.95005	7.30867	1.9816
7.31667	0.1651	7.31667	1.77495	7.31683	2.227	7.317	2.17385	7.317	1.9531	7.31667	3.0598	7.317	2.92565	7.317	1.9501
7.325	0.16275	7.325	1.7534	7.32517	2.20445	7.32533	2.1583	7.32533	1.93395	7.325	3.0355	7.32533	2.9015	7.32533	1.923
7.33333	0.16405	7.33333	1.7346	7.3335	2.1851	7.33367	2.1365	7.33367	1.91455	7.33333	3.01055	7.33367	2.87865	7.33367	1.89855
7.34167	0.16125	7.34167	1.71595	7.34183	2.1657	7.342	2.11955	7.342	1.89875	7.34167	2.9884	7.342	2.8551	7.342	1.8783
7.35	0.1623	7.35	1.6979	7.35017	2.1463	7.35033	2.1006	7.35033	1.88365	7.35	2.9654	7.35033	2.83485	7.35033	1.8687
7.35833	0.16145	7.35833	1.67975	7.3585	2.12915	7.35867	2.08485	7.35867	1.86685	7.35833	2.9448	7.35867	2.81195	7.35867	1.8752
7.36667	0.16965	7.36667	1.6641	7.36683	2.1122	7.367	2.06855	7.367	1.8553	7.36667	2.9242	7.367	2.79475	7.367	1.90725
7.375	0.16885	7.375	1.6466	7.37517	2.09455	7.37533	2.0522	7.37533	1.8432	7.375	2.89615	7.37533	2.77435	7.37533	1.9737
7.38333	0.18985	7.38333	1.6318	7.3835	2.07665	7.38367	2.0353	7.38367	1.8314	7.38333	2.8689	7.38367	2.7537	7.38367	2.08445
7.39167	0.15775	7.39167	1.618	7.39183	2.05855	7.392	2.0214	7.392	1.8232	7.39167	2.87855	7.392	2.7334	7.392	2.24645
7.4	0.1665	7.4	1.6017	7.40017	2.04145	7.40033	2.0039	7.40033	1.81415	7.4	2.85655	7.40033	2.71545	7.40033	2.46215
7.40833	0.15255	7.40833	1.58605	7.4085	2.0257	7.40867	1.99075	7.40867	1.80595	7.40833	2.82125	7.40867	2.6948	7.40867	2.7274
7.41667	0.16235	7.41667	1.57145	7.41683	2.0086	7.417	1.975	7.417	1.79865	7.41667	2.79455	7.417	2.67645	7.417	3.0286
7.425	0.1662	7.425	1.5581	7.42517	1.999	7.42533	1.9623	7.42533	1.78995	7.425	2.77885	7.42533	2.66245	7.42533	3.34575
7.43333	0.16885	7.43333	1.5432	7.4335	1.9798	7.43367	1.94945	7.43367	1.7799	7.43333	2.75855	7.43367	2.64335	7.43367	3.65165
7.44167	0.1687	7.44167	1.5287	7.44183	1.9647	7.442	1.9355	7.442	1.7717	7.44167	2.73895	7.442	2.62485	7.442	3.92545
7.45	0.1692	7.45	1.51535	7.45017	1.9512	7.45033	1.92175	7.45033	1.75745	7.45	2.72175	7.45033	2.6083	7.45033	4.1397
7.45833	0.17135	7.45833	1.50195	7.4585	1.9359	7.45867	1.9085	7.45867	1.7448	7.45833	2.7069	7.45867	2.5924	7.45867	4.27985
7.46667	0.1678	7.46667	1.48765	7.46683	1.921	7.467	1.89485	7.467	1.7307	7.46667	2.6881	7.467	2.57505	7.467	4.3409
7.475	0.16755	7.475	1.47315	7.47517	1.9082	7.47533	1.8836	7.47533	1.7172	7.475	2.6743	7.47533	2.5615	7.47533	4.32155
7.48333	0.168	7.48333	1.46115	7.4835	1.89725	7.48367	1.87	7.48367	1.70265	7.48333	2.6563	7.48367	2.5458	7.48367	4.23225
7.49167	0.1688	7.49167	1.44915	7.49183	1.88285	7.492	1.8557	7.492	1.68645	7.49167	2.6419	7.492	2.52885	7.492	4.08295
7.5	0.16885	7.5	1.4357	7.50017	1.8671	7.50033	1.84555	7.50033	1.6725	7.5	2.6218	7.50033	2.51075	7.50033	3.8923
7.50833	0.16705	7.50833	1.4251	7.5085	1.8568	7.50867	1.8343	7.50867	1.65945	7.50833	2.60965	7.50867	2.4984	7.50867	3.67645
7.51667	0.1687	7.51667	1.41185	7.51683	1.8454	7.517	1.8227	7.517	1.6447	7.51667	2.59355	7.517	2.48055	7.517	3.44435
7.525	0.16875	7.525	1.4008	7.52517	1.8307	7.52533	1.809	7.52533	1.63085	7.525	2.57755	7.52533	2.46575	7.52533	3.20955
7.53333	0.16905	7.53333	1.39135	7.5335	1.81745	7.53367	1.7968	7.53367	1.6172	7.53333	2.5608	7.53367	2.4504	7.53367	2.98215
7.54167	0.168	7.54167	1.37915	7.54183	1.80595	7.542	1.7828	7.542	1.60365	7.54167	2.5462	7.542	2.43415	7.542	2.7673
7.55	0.16995	7.55	1.36835	7.55017	1.79365	7.55033	1.7711	7.55033	1.5917	7.55	2.5286	7.55033	2.4205	7.55033	2.57475
7.55833	0.16985	7.55833	1.357	7.5585	1.7821	7.55867	1.75875	7.55867	1.58145	7.55833	2.51335	7.55867	2.40695	7.55867	2.39995
7.56667	0.1701	7.56667	1.3465	7.56683	1.76975	7.567	1.74845	7.567	1.571	7.56667	2.4991	7.567	2.3912	7.567	2.2489
7.575	0.171	7.575	1.33635	7.57517	1.76	7.57533	1.7347	7.57533	1.5592	7.575	2.4864	7.57533	2.3775	7.57533	2.116
7.58333	0.171	7.58333	1.326	7.5835	1.7478	7.58367	1.7254	7.58367	1.5481	7.58333	2.4681	7.58367	2.36395	7.58367	2.00405
7.59167	0.1712	7.59167	1.317	7.59183	1.7345	7.592	1.71435	7.592	1.5405	7.59167	2.45255	7.592	2.3475	7.592	1.9102
7.6	0.17425	7.6	1.30875	7.60017	1.7253	7.60033	1.70255	7.60033	1.5283	7.6	2.44035	7.60033	2.33505	7.60033	1.8289
7.60833	0.17545	7.60833	1.3012	7.6085	1.71315	7.60867	1.6907	7.60867	1.5208	7.60833	2.4256	7.60867	2.3221	7.60867	1.7601
7.61667	0.17705	7.61667	1.29135	7.61683	1.7047	7.617	1.6797	7.617	1.51195	7.61667	2.4118	7.617	2.3115	7.617	1.703
7.625	0.17605	7.625	1.2828	7.62517	1.69405	7.62533	1.66945	7.62533	1.5048	7.625	2.3977	7.62533	2.2986	7.62533	1.65425
7.63333	0.13035	7.63333	1.2722	7.6335	1.68285	7.63367	1.66235	7.63367	1.4954	7.63333	2.38305	7.63367	2.2841	7.63367	1.61285
7.64167	0.1684	7.64167	1.2629	7.64183	1.67405	7.642	1.65225	7.642	1.48885	7.64167	2.3723	7.642	2.274	7.642	1.579
7.65	0.36615	7.65	1.2563	7.65017	1.66355	7.65033	1.64205	7.65033	1.4802	7.65	2.3591	7.65033	2.2612	7.65033	1.54765
7.65833	0.3147	7.65833	1.2477	7.6585	1.6523	7.65867	1.6313	7.65867	1.47305	7.65833	2.3454	7.65867	2.2476	7.65867	1.52365
7.66667	0.18995	7.66667	1.24015	7.66683	1.6418	7.667	1.6203	7.667	1.4646	7.66667	2.3315	7.667	2.23575	7.667	1.4989
7.675	0.1558	7.675	1.2316	7.67517	1.6334	7.67533	1.61255	7.67533	1.4582	7.675	2.32045	7.67533	2.2244	7.67533	1.4791
7.68333	0.1686	7.68333	1.22135	7.6835	1.6225	7.68367	1.602	7.68367	1.45165	7.68333	2.3089	7.68367	2.2137	7.68367	1.4602
7.69167	0.17655	7.69167	1.21415	7.69183	1.61095	7.692	1.5926	7.692	1.44545	7.69167	2.29395	7.692	2.2013	7.692	1.4459
7.7	0.1782	7.7	1.20725	7.70017	1.60365	7.70033	1.58475	7.70033	1.44045	7.7	2.285	7.70033	2.1894	7.70033	1.42935
7.70833	0.1796	7.70833	1.1981	7.7085	1.5908	7.70867	1.57585	7.70867	1.4296	7.70833	2.27205	7.70867	2.17625	7.70867	1.41635
7.71667	0.18355	7.71667	1.19245	7.71683	1.58155	7.717	1.56415	7.717	1.42225	7.71667	2.25935	7.717	2.1643	7.717	1.4054
7.725	0.18225	7.725	1.1844	7.72517	1.57125	7.72533	1.55685	7.72533	1.4136	7.725	2.2476	7.72533	2.15335	7.72533	1.3902
7.73333	0.18245	7.73333	1.17655	7.7335	1.5624	7.73367	1.546	7.73367	1.40785	7.73333	2.23575	7.73367	2.1407	7.73367	1.37885
7.74167	0.1815	7.74167	1.16905	7.74183	1.5534	7.742	1.53505	7.742	1.4014	7.74167	2.2237	7.742	2.1311	7.742	1.36875
7.75	0.18155	7.75	1.16035	7.75017	1.5437	7.75033	1.52635	7.75033	1.3951	7.75	2.2123	7.75033	2.12035	7.75033	1.35905
7.75833	0.18155	7.75833	1.15165	7.7585	1.53355	7.75867	1.5159	7.75867	1.39005	7.75833	2.19995	7.75867	2.1078	7.75867	1.34925
7.76667	0.18185	7.76667	1.14425	7.76683	1.5251	7.767	1.5041	7.767	1.38405	7.76667	2.1916	7.767	2.09785	7.767	1.3394
7.775	0.18245	7.775	1.13825	7.77517	1.5161	7.77533	1.49415	7.77533	1.37805	7.775	2.1789	7.77533	2.08725	7.77533	1.33095
7.78333	0.18225	7.78333	1.13275	7.7835	1.50775	7.78367	1.4844	7.78367	1.373	7.78333	2.1678	7.78367	2.0768	7.78367	1.3216
7.79167	0.18455	7.79167	1.12655	7.79183	1.49855	7.792	1.47425	7.792	1.36665	7.79167	2.1562	7.792	2.06625	7.792	1.3125
7.8	0.1842	7.8	1.12005	7.80017	1.49295	7.80033	1.46355	7.80033	1.36135	7.8	2.1476	7.80033	2.0594	7.80033	1.30465
7.80833	0.1868	7.80833	1.11785	7.8085	1.48585	7.80867	1.45435	7.80867	1.3573	7.80833	2.1386	7.80867	2.05065	7.80867	1.29595
7.81667	0.18725	7.81667	1.11245	7.81683	1.4788	7.817	1.4447	7.817	1.3534	7.81667	2.128	7.817	2.04025	7.817	1.28945
7.825	0.18675	7.825	1.10935	7.82517	1.4696	7.82533	1.4395	7.82533	1.34705	7.825	2.11805	7.82533	2.0302	7.82533	1.2818
7.83333	0.19035	7.83333	1.1069	7.8335	1.4631	7.83367	1.4317	7.83367	1.3412	7.83333	2.11185	7.83367	2.02455	7.83367	1.27735
7.84167	0.1935	7.84167	1.1021	7.84183	1.4552	7.842	1.42565	7.842	1.33885	7.84167	2.1016	7.842	2.01525	7.842	1.27565
7.85	0.195	7.85	1.10005	7.85017	1.4504	7.85033	1.42395	7.85033	1.33185	7.85	2.0899	7.85033	2.00875	7.85033	1.27355
7.85833	0.195	7.85833	1.09435	7.8585	1.4442	7.85867	1.4264	7.85867	1.3264	7.85833	2.0818	7.85867	2.00325	7.85867	1.27295
7.86667	0.1968	7.86667	1.0879	7.86683	1.44095	7.867	1.43565	7.867	1.3245	7.86667	2.0906	7.867	1.9973	7.867	1.27745
7.875	0.20095	7.875	1.0836	7.87517	1.4348	7.87533	1.45125	7.87533	1.3193	7.875	2.08575	7.87533	1.9948	7.87533	1.28135
7.88333	0.1979	7.88333	1.079	7.8835	1.4364	7.88367	1.4777	7.88367	1.3143	7.88333	2.07795	7.88367	1.9985	7.88367	1.2872
7.89167	0.1971	7.89167	1.0739	7.89183	1.43585	7.892	1.5187	7.892	1.31085	7.89167	2.0821	7.892	2.00365	7.892	1.29505
7.9	0.1993	7.9	1.0768	7.90017	1.44095	7.90033	1.5784	7.90033	1.304	7.9	2.09095	7.90033	2.0184	7.90033	1.3008
7.90833	0.19955	7.90833	1.08525	7.9085	1.4518	7.90867	1.65655	7.90867	1.2998	7.90833	2.11045	7.90867	2.0432	7.90867	1.307
7.91667	0.1987	7.91667	1.0942	7.91683	1.4684	7.917	1.75345	7.917	1.2955	7.91667	2.13875	7.917	2.0801	7.917	1.31345
7.925	0.20405	7.925	1.09225	7.92517	1.49845	7.92533	1.8706	7.92533	1.28905	7.925	2.1826	7.92533	2.1328	7.92533	1.3209
7.93333	0.20885	7.93333	1.08315	7.9335	1.53835	7.93367	2.0014	7.93367	1.2854	7.93333	2.2402	7.93367	2.2029	7.93367	1.3309
7.94167	0.21485	7.94167	1.05635	7.94183	1.58965	7.942	2.14	7.942	1.28015	7.94167	2.3123	7.942	2.28755	7.942	1.3433
7.95	0.224	7.95	0.99985	7.95017	1.65455	7.95033	2.2719	7.95033	1.2761	7.95	2.39795	7.95033	2.38415	7.95033	1.36295
7.95833	0.22455	7.95833	1.0976	7.9585	1.7297	7.95867	2.38705	7.95867	1.27475	7.95833	2.49565	7.95867	2.49235	7.95867	1.3837
7.96667	0.21705	7.96667	1.84005	7.96683	1.81165	7.967	2.48355	7.967	1.26565	7.96667	2.5935	7.967	2.5999	7.967	1.408
7.975	0.20085	7.975	3.0338	7.97517	1.89485	7.97533	2.54575	7.97533	1.2626	7.975	2.6882	7.97533	2.70025	7.97533	1.4353
7.98333	0.1662	7.98333	4.1818	7.9835	1.97315	7.98367	2.5753	7.98367	1.25875	7.98333	2.7713	7.98367	2.787	7.98367	1.463
7.99167	0.1662	7.99167	5.08745	7.99183	2.04075	7.992	2.5715	7.992	1.25575	7.99167	2.8374	7.992	2.8554	7.992	1.48735
8	0.636	8	5.7625	8.00017	2.08925	8.00033	2.54435	8.00033	1.25355	8	2.8794	8.00033	2.8933	8.00033	1.5058
8.00833	1.67905	8.00833	6.2636	8.0085	2.11975	8.00867	2.49215	8.00867	1.2502	8.00833	2.89375	8.00867	2.90675	8.00867	1.51695
8.01667	2.82235	8.01667	6.6492	8.01683	2.1301	8.017	2.42165	8.017	1.2465	8.01667	2.8928	8.017	2.8989	8.017	1.5175
8.025	3.77985	8.025	7.01405	8.02517	2.12385	8.02533	2.337	8.02533	1.2459	8.025	2.86745	8.02533	2.86955	8.02533	1.50835
8.03333	4.5111	8.03333	7.366	8.0335	2.10245	8.03367	2.24125	8.03367	1.24115	8.03333	2.82725	8.03367	2.8235	8.03367	1.4892
8.04167	5.0556	8.04167	7.6475	8.04183	2.06705	8.042	2.1404	8.042	1.23735	8.04167	2.7711	8.042	2.762	8.042	1.4617
8.05	5.46625	8.05	7.84055	8.05017	2.0196	8.05033	2.03785	8.05033	1.23665	8.05	2.7087	8.05033	2.6912	8.05033	1.43345
8.05833	5.8188	8.05833	7.9702	8.0585	1.9629	8.05867	1.9343	8.05867	1.2353	8.05833	2.6319	8.05867	2.6088	8.05867	1.40235
8.06667	6.1631	8.06667	8.05485	8.06683	1.9028	8.067	1.8294	8.067	1.2308	8.06667	2.554	8.067	2.52405	8.067	1.3669
8.075	6.47485	8.075	8.115	8.07517	1.8382	8.07533	1.7329	8.07533	1.2292	8.075	2.4693	8.07533	2.4334	8.07533	1.3361
8.08333	6.7043	8.08333	8.15705	8.0835	1.76905	8.08367	1.64185	8.08367	1.2249	8.08333	2.3855	8.08367	2.34285	8.08367	1.30685
8.09167	6.86295	8.09167	8.18865	8.09183	1.70065	8.092	1.56115	8.092	1.22205	8.09167	2.30155	8.092	2.25515	8.092	1.27765
8.1	6.96725	8.1	8.21115	8.10017	1.6324	8.10033	1.48905	8.10033	1.21825	8.1	2.22445	8.10033	2.1723	8.10033	1.25195
8.10833	7.0423	8.10833	8.22575	8.1085	1.56935	8.10867	1.4304	8.10867	1.21675	8.10833	2.1478	8.10867	2.0946	8.10867	1.2308
8.11667	7.0903	8.11667	8.2357	8.11683	1.5128	8.117	1.37785	8.117	1.2133	8.11667	2.0849	8.117	2.02815	8.117	1.21105
8.125	7.12705	8.125	8.2394	8.12517	1.4582	8.12533	1.33325	8.12533	1.2099	8.125	2.0247	8.12533	1.9675	8.12533	1.19155
8.13333	7.15625	8.13333	8.2409	8.1335	1.4128	8.13367	1.29715	8.13367	1.20605	8.13333	1.97725	8.13367	1.91775	8.13367	1.1761
8.14167	7.1749	8.14167	8.23755	8.14183	1.37545	8.142	1.26725	8.142	1.20435	8.14167	1.93515	8.142	1.87525	8.142	1.1651
8.15	7.19275	8.15	8.23505	8.15017	1.344	8.15033	1.2411	8.15033	1.1992	8.15	1.90195	8.15033	1.8403	8.15033	1.151
8.15833	7.20135	8.15833	8.22615	8.1585	1.3171	8.15867	1.22085	8.15867	1.197	8.15833	1.8703	8.15867	1.8108	8.15867	1.1408
8.16667	7.20745	8.16667	8.2188	8.16683	1.2981	8.167	1.20075	8.167	1.19165	8.16667	1.8508	8.167	1.79015	8.167	1.1281
8.175	7.20945	8.175	8.20625	8.17517	1.28095	8.17533	1.18555	8.17533	1.18765	8.175	1.8329	8.17533	1.77215	8.17533	1.12105
8.18333	7.21075	8.18333	8.1919	8.1835	1.26775	8.18367	1.17065	8.18367	1.18565	8.18333	1.81845	8.18367	1.75715	8.18367	1.1132
8.19167	7.2078	8.19167	8.17605	8.19183	1.2546	8.192	1.1606	8.192	1.1829	8.19167	1.80295	8.192	1.7412	8.192	1.1075
8.2	7.20425	8.2	8.16185	8.20017	1.2459	8.20033	1.14945	8.20033	1.17925	8.2	1.7913	8.20033	1.7306	8.20033	1.10055
8.20833	7.1995	8.20833	8.14355	8.2085	1.23705	8.20867	1.1383	8.20867	1.17715	8.20833	1.78345	8.20867	1.7211	8.20867	1.09685
8.21667	7.18775	8.21667	8.12335	8.21683	1.23075	8.217	1.13135	8.217	1.17555	8.21667	1.77445	8.217	1.71265	8.217	1.09275
8.225	7.17975	8.225	8.1042	8.22517	1.22205	8.22533	1.12605	8.22533	1.17055	8.225	1.7643	8.22533	1.702	8.22533	1.0888
8.23333	7.1666	8.23333	8.0849	8.2335	1.21495	8.23367	1.1166	8.23367	1.16855	8.23333	1.7541	8.23367	1.6947	8.23367	1.0885
8.24167	7.1508	8.24167	8.05905	8.24183	1.20825	8.242	1.1064	8.242	1.16795	8.24167	1.74945	8.242	1.6872	8.242	1.093
8.25	7.1381	8.25	8.0387	8.25017	1.20375	8.25033	1.1013	8.25033	1.1677	8.25	1.7395	8.25033	1.6803	8.25033	1.10145
8.25833	7.1215	8.25833	8.0126	8.2585	1.19605	8.25867	1.09375	8.25867	1.16825	8.25833	1.73165	8.25867	1.671	8.25867	1.1215
8.26667	7.1051	8.26667	7.98895	8.26683	1.191	8.267	1.0889	8.267	1.17145	8.26667	1.7237	8.267	1.66505	8.267	1.1607
8.275	7.0868	8.275	7.9614	8.27517	1.1852	8.27533	1.08205	8.27533	1.1762	8.275	1.7154	8.27533	1.65805	8.27533	1.22625
8.28333	7.06765	8.28333	7.9373	8.2835	1.17975	8.28367	1.07655	8.28367	1.18435	8.28333	1.71005	8.28367	1.6512	8.28367	1.32975
8.29167	7.0472	8.29167	7.90785	8.29183	1.17295	8.292	1.06755	8.292	1.197	8.29167	1.701	8.292	1.64	8.292	1.48995
8.3	7.02565	8.3	7.88025	8.30017	1.16795	8.30033	1.06315	8.30033	1.2169	8.3	1.6943	8.30033	1.63455	8.30033	1.7232
8.30833	7.0053	8.30833	7.8532	8.3085	1.1633	8.30867	1.05625	8.30867	1.2459	8.30833	1.6876	8.30867	1.62935	8.30867	2.04455
8.31667	6.98435	8.31667	7.8251	8.31683	1.1562	8.317	1.05065	8.317	1.2802	8.31667	1.6784	8.317	1.62005	8.317	2.4556
8.325	6.96015	8.325	7.7934	8.32517	1.1512	8.32533	1.04425	8.32533	1.32385	8.325	1.67	8.32533	1.61115	8.32533	2.9575
8.33333	6.936	8.33333	7.76375	8.3335	1.14395	8.33367	1.03955	8.33367	1.36945	8.33333	1.66275	8.33367	1.60345	8.33367	3.52455
8.34167	6.9115	8.34167	7.73365	8.34183	1.13825	8.342	1.0324	8.342	1.4176	8.34167	1.6558	8.342	1.5959	8.342	4.12465
8.35	6.8844	8.35	7.7023	8.35017	1.1332	8.35033	1.02905	8.35033	1.46365	8.35	1.6488	8.35033	1.5885	8.35033	4.7042
8.35833	6.85915	8.35833	7.6702	8.3585	1.12955	8.35867	1.0256	8.35867	1.5001	8.35833	1.64285	8.35867	1.58265	8.35867	5.2133
8.36667	6.83925	8.36667	7.64035	8.36683	1.12565	8.367	1.01995	8.367	1.52895	8.36667	1.6367	8.367	1.5771	8.367	5.60725
8.375	6.8539	8.375	7.65105	8.37517	1.11865	8.37533	1.0182	8.37533	1.54215	8.375	1.6295	8.37533	1.5694	8.37533	5.847
8.38333	6.77505	8.38333	7.5657	8.3835	1.11435	8.38367	1.01305	8.38367	1.54215	8.38333	1.62335	8.38367	1.563	8.38367	5.9192
8.39167	6.6696	8.39167	7.45135	8.39183	1.11	8.392	1.0095	8.392	1.52765	8.39167	1.61875	8.392	1.55815	8.392	5.82925
8.4	6.70415	8.4	7.4821	8.40017	1.10725	8.40033	1.0064	8.40033	1.50195	8.4	1.61585	8.40033	1.55235	8.40033	5.59375
8.40833	6.70025	8.40833	7.47095	8.4085	1.1044	8.40867	1.00425	8.40867	1.4662	8.40833	1.60945	8.40867	1.5479	8.40867	5.24995
8.41667	6.67225	8.41667	7.4375	8.41683	1.1013	8.417	0.999401	8.417	1.42385	8.41667	1.6061	8.417	1.5438	8.417	4.83505
8.425	6.64055	8.425	7.4014	8.42517	1.09715	8.42533	0.997801	8.42533	1.3788	8.425	1.6007	8.42533	1.5378	8.42533	4.38555
8.43333	6.6104	8.43333	7.3651	8.4335	1.0912	8.43367	0.993601	8.43367	1.3353	8.43333	1.59545	8.43367	1.5317	8.43367	3.9331
8.44167	6.58265	8.44167	7.3288	8.44183	1.0905	8.442	0.991901	8.442	1.2878	8.44167	1.5908	8.442	1.52885	8.442	3.49335
8.45	6.55135	8.45	7.2936	8.45017	1.08745	8.45033	0.988551	8.45033	1.24325	8.45	1.5878	8.45033	1.52395	8.45033	3.08795
8.45833	6.52145	8.45833	7.2554	8.4585	1.08275	8.45867	0.984701	8.45867	1.20375	8.45833	1.58215	8.45867	1.52015	8.45867	2.72545
8.46667	6.48695	8.46667	7.21875	8.46683	1.07815	8.467	0.979501	8.467	1.1666	8.46667	1.5778	8.467	1.51185	8.467	2.4036
8.475	6.458	8.475	7.1814	8.47517	1.0764	8.47533	0.973201	8.47533	1.1327	8.475	1.5752	8.47533	1.509	8.47533	2.12415
8.48333	6.42615	8.48333	7.14045	8.4835	1.07215	8.48367	0.969051	8.48367	1.10815	8.48333	1.56865	8.48367	1.5019	8.48367	1.8881
8.49167	6.3919	8.49167	7.1069	8.49183	1.0713	8.492	0.964051	8.492	1.0828	8.49167	1.567	8.492	1.49995	8.492	1.6915
8.5	6.36085	8.5	7.068	8.50017	1.06525	8.50033	0.957401	8.50033	1.06385	8.5	1.5593	8.50033	1.49465	8.50033	1.52935
8.50833	6.32955	8.50833	7.03085	8.5085	1.06345	8.50867	0.951851	8.50867	1.0525	8.50833	1.5554	8.50867	1.4895	8.50867	1.3962
8.51667	6.29475	8.51667	6.99	8.51683	1.0606	8.517	0.946901	8.517	1.0449	8.51667	1.55195	8.517	1.48605	8.517	1.29005
8.525	6.2614	8.525	6.95045	8.52517	1.05985	8.52533	0.941751	8.52533	1.04125	8.525	1.54845	8.52533	1.48175	8.52533	1.20865
8.53333	6.22805	8.53333	6.91065	8.5335	1.0589	8.53367	0.936501	8.53367	1.04015	8.53333	1.546	8.53367	1.47975	8.53367	1.1423
8.54167	6.19415	8.54167	6.87055	8.54183	1.05605	8.542	0.929451	8.542	1.0398	8.54167	1.54195	8.542	1.47395	8.542	1.09535
8.55	6.15745	8.55	6.8301	8.55017	1.054	8.55033	0.925701	8.55033	1.04335	8.55	1.53605	8.55033	1.47025	8.55033	1.0615
8.55833	6.1227	8.55833	6.7874	8.5585	1.05345	8.55867	0.920801	8.55867	1.04855	8.55833	1.5358	8.55867	1.4665	8.55867	1.0385
8.56667	6.0858	8.56667	6.7456	8.56683	1.05065	8.567	0.916651	8.567	1.0534	8.56667	1.5289	8.567	1.46205	8.567	1.02615
8.575	6.04755	8.575	6.7035	8.57517	1.0508	8.57533	0.910801	8.57533	1.05775	8.575	1.52735	8.57533	1.4595	8.57533	1.0181
8.58333	6.01265	8.58333	6.66295	8.5835	1.04945	8.58367	0.906601	8.58367	1.0613	8.58333	1.525	8.58367	1.4572	8.58367	1.01695
8.59167	5.9761	8.59167	6.61845	8.59183	1.0483	8.592	0.900751	8.592	1.06535	8.59167	1.5213	8.592	1.45325	8.592	1.0179
8.6	5.9368	8.6	6.5773	8.60017	1.0476	8.60033	0.895301	8.60033	1.07055	8.6	1.51765	8.60033	1.45015	8.60033	1.02305
8.60833	5.8968	8.60833	6.5307	8.6085	1.04485	8.60867	0.890051	8.60867	1.07205	8.60833	1.51165	8.60867	1.44535	8.60867	1.0275
8.61667	5.85775	8.61667	6.4858	8.61683	1.04465	8.617	0.884151	8.617	1.07725	8.61667	1.51215	8.617	1.44395	8.617	1.03195
8.625	5.81695	8.625	6.4408	8.62517	1.0404	8.62533	0.879301	8.62533	1.08105	8.625	1.50595	8.62533	1.4386	8.62533	1.03615
8.63333	5.77525	8.63333	6.3929	8.6335	1.0378	8.63367	0.873201	8.63367	1.07975	8.63333	1.50165	8.63367	1.4338	8.63367	1.0389
8.64167	5.73345	8.64167	6.34475	8.64183	1.0357	8.642	0.872201	8.642	1.08105	8.64167	1.4996	8.642	1.4303	8.642	1.04325
8.65	5.6923	8.65	6.29765	8.65017	1.0597	8.65033	0.866501	8.65033	1.0816	8.65	1.52225	8.65033	1.45465	8.65033	1.04505
8.65833	5.64435	8.65833	6.25015	8.6585	1.0475	8.65867	0.861101	8.65867	1.0811	8.65833	1.50765	8.65867	1.43975	8.65867	1.0442
8.66667	5.59905	8.66667	6.19965	8.66683	0.9059	8.667	0.853101	8.667	1.08	8.66667	1.3671	8.667	1.2993	8.667	1.0424
8.675	5.55225	8.675	6.14885	8.67517	1.0132	8.67533	0.851401	8.67533	1.0799	8.675	1.4707	8.67533	1.40405	8.67533	1.0416
8.68333	5.50535	8.68333	6.0983	8.6835	1.04105	8.68367	0.844401	8.68367	1.07805	8.68333	1.49965	8.68367	1.43355	8.68367	1.03835
8.69167	5.4566	8.69167	6.04575	8.69183	1.0286	8.692	0.839251	8.692	1.0772	8.69167	1.48395	8.692	1.4194	8.692	1.0363
8.7	5.4046	8.7	5.9906	8.70017	1.01305	8.70033	0.836601	8.70033	1.0755	8.7	1.47035	8.70033	1.40385	8.70033	1.03365
8.70833	5.35355	8.70833	5.93465	8.7085	1.00985	8.70867	0.832751	8.70867	1.0734	8.70833	1.46375	8.70867	1.39795	8.70867	1.0315
8.71667	5.3041	8.71667	5.88015	8.71683	1.0023	8.717	0.829751	8.717	1.07235	8.71667	1.4555	8.717	1.3914	8.717	1.0281
8.725	5.2339	8.725	5.8241	8.72517	0.99815	8.72533	0.826851	8.72533	1.07055	8.725	1.44975	8.72533	1.3853	8.72533	1.0228
8.73333	5.19815	8.73333	5.7664	8.7335	0.99315	8.73367	0.823101	8.73367	1.06625	8.73333	1.4452	8.73367	1.37995	8.73367	1.0191
8.74167	5.15205	8.74167	5.70665	8.74183	0.9909	8.742	0.819951	8.742	1.06795	8.74167	1.44045	8.742	1.37845	8.742	1.01405
8.75	5.07825	8.75	5.6459	8.75017	0.98675	8.75033	0.818651	8.75033	1.06445	8.75	1.43555	8.75033	1.3722	8.75033	1.0109
8.75833	5.02045	8.75833	5.5848	8.7585	0.98415	8.75867	0.817551	8.75867	1.06345	8.75833	1.4307	8.75867	1.36955	8.75867	1.0078
8.76667	4.9618	8.76667	5.5243	8.76683	0.9789	8.767	0.815051	8.767	1.0604	8.76667	1.42445	8.767	1.3637	8.767	1.0031
8.775	4.9117	8.775	5.4633	8.77517	0.9767	8.77533	0.812301	8.77533	1.061	8.775	1.42245	8.77533	1.36215	8.77533	1.00095
8.78333	4.84425	8.78333	5.39995	8.7835	0.9725	8.78367	0.810801	8.78367	1.0591	8.78333	1.41505	8.78367	1.3557	8.78367	0.9987
8.79167	4.7884	8.79167	5.33885	8.79183	0.97115	8.792	0.808701	8.792	1.0584	8.79167	1.41315	8.792	1.35405	8.792	0.99665
8.8	4.7281	8.8	5.275	8.80017	0.96775	8.80033	0.806751	8.80033	1.05755	8.8	1.40835	8.80033	1.3514	8.80033	0.9988
8.80833	4.6693	8.80833	5.2148	8.8085	0.96515	8.80867	0.804551	8.80867	1.05815	8.80833	1.40615	8.80867	1.3469	8.80867	1.003
8.81667	4.60795	8.81667	5.1491	8.81683	0.9614	8.817	0.798451	8.817	1.05865	8.81667	1.39925	8.817	1.34245	8.817	1.01065
8.825	4.5475	8.825	5.08435	8.82517	0.95855	8.82533	0.798401	8.82533	1.05875	8.825	1.39685	8.82533	1.3413	8.82533	1.0213
8.83333	4.4848	8.83333	5.0188	8.8335	0.9574	8.83367	0.790951	8.83367	1.06135	8.83333	1.3945	8.83367	1.33855	8.83367	1.0353
8.84167	4.4211	8.84167	4.95385	8.84183	0.95445	8.842	0.785751	8.842	1.06075	8.84167	1.39155	8.842	1.3367	8.842	1.05225
8.85	4.35915	8.85	4.88535	8.85017	0.95145	8.85033	0.783901	8.85033	1.0607	8.85	1.38625	8.85033	1.3319	8.85033	1.0678
8.85833	4.29435	8.85833	4.8209	8.8585	0.95	8.85867	0.779301	8.85867	1.0633	8.85833	1.38355	8.85867	1.32675	8.85867	1.0847
8.86667	4.2404	8.86667	4.7567	8.86683	0.94835	8.867	0.774251	8.867	1.0642	8.86667	1.3805	8.867	1.3274	8.867	1.1005
8.875	4.1847	8.875	4.6992	8.87517	0.9463	8.87533	0.769301	8.87533	1.06415	8.875	1.37745	8.87533	1.3222	8.87533	1.1102
8.88333	4.148	8.88333	4.6671	8.8835	0.9421	8.88367	0.766551	8.88367	1.0643	8.88333	1.37435	8.88367	1.31985	8.88367	1.11705
8.89167	4.0395	8.89167	4.5481	8.89183	0.94285	8.892	0.761801	8.892	1.06305	8.89167	1.37425	8.892	1.31865	8.892	1.11975
8.9	3.85565	8.9	4.3597	8.90017	0.94	8.90033	0.758551	8.90033	1.06315	8.9	1.3695	8.90033	1.31685	8.90033	1.1141
8.90833	3.92325	8.90833	4.42475	8.9085	0.9371	8.90867	0.754201	8.90867	1.06175	8.90833	1.3679	8.90867	1.3138	8.90867	1.1054
8.91667	3.85765	8.91667	4.35435	8.91683	0.9366	8.917	0.751801	8.917	1.0606	8.91667	1.36485	8.917	1.31315	8.917	1.09265
8.925	3.78345	8.925	4.2773	8.92517	0.9354	8.92533	0.749351	8.92533	1.05795	8.925	1.3629	8.92533	1.31225	8.92533	1.07785
8.93333	3.7153	8.93333	4.20485	8.9335	0.93385	8.93367	0.745451	8.93367	1.05775	8.93333	1.3606	8.93367	1.31045	8.93367	1.0939
8.94167	3.64835	8.94167	4.1334	8.94183	0.931	8.942	0.742301	8.942	1.0526	8.94167	1.3568	8.942	1.3073	8.942	1.0348
8.95	3.5824	8.95	4.06415	8.95017	0.9304	8.95033	0.741201	8.95033	1.0517	8.95	1.3571	8.95033	1.30715	8.95033	1.0228
8.95833	3.51425	8.95833	3.99295	8.9585	0.92965	8.95867	0.737701	8.95867	1.0468	8.95833	1.3551	8.95867	1.30475	8.95867	1.0068
8.96667	3.4477	8.96667	3.92275	8.96683	0.929	8.967	0.734351	8.967	1.0476	8.96667	1.3531	8.967	1.30265	8.967	0.9957
8.975	3.3802	8.975	3.8501	8.97517	0.92635	8.97533	0.731401	8.97533	1.0457	8.975	1.3526	8.97533	1.3017	8.97533	0.98225
8.98333	3.31245	8.98333	3.77845	8.9835	0.9262	8.98367	0.728551	8.98367	1.0441	8.98333	1.35055	8.98367	1.3014	8.98367	0.9737
8.99167	3.24555	8.99167	3.70785	8.99183	0.9249	8.992	0.728851	8.992	1.04475	8.99167	1.35065	8.992	1.2991	8.992	0.96655
9	3.1763	9	3.6363	9.00017	0.92405	9.00033	0.725351	9.00033	1.043	9	1.34885	9.00033	1.2982	9.00033	0.95815
9.00833	3.1078	9.00833	3.5634	9.0085	0.92405	9.00867	0.720601	9.00867	1.04255	9.00833	1.3484	9.00867	1.2966	9.00867	0.95435
9.01667	3.04165	9.01667	3.49405	9.01683	0.92115	9.017	0.719051	9.017	1.0416	9.01667	1.34655	9.017	1.2934	9.017	0.9518
9.025	2.9748	9.025	3.4223	9.02517	0.9211	9.02533	0.715901	9.02533	1.0426	9.025	1.34505	9.02533	1.2926	9.02533	0.95005
9.03333	2.9093	9.03333	3.3524	9.0335	0.9182	9.03367	0.713051	9.03367	1.04245	9.03333	1.3449	9.03367	1.2901	9.03367	0.94625
9.04167	2.8424	9.04167	3.2806	9.04183	0.91915	9.042	0.710451	9.042	1.04285	9.04167	1.34415	9.042	1.28945	9.042	0.94665
9.05	2.77695	9.05	3.21255	9.05017	0.9205	9.05033	0.709851	9.05033	1.0426	9.05	1.34655	9.05033	1.288	9.05033	0.94575
9.05833	2.70885	9.05833	3.14035	9.0585	0.92105	9.05867	0.706651	9.05867	1.04185	9.05833	1.3445	9.05867	1.2895	9.05867	0.94475
9.06667	2.64305	9.06667	3.07005	9.06683	0.9197	9.067	0.704151	9.067	1.04195	9.06667	1.34715	9.067	1.2857	9.067	0.94415
9.075	2.57845	9.075	3.0004	9.07517	0.92105	9.07533	0.701151	9.07533	1.0415	9.075	1.35065	9.07533	1.28355	9.07533	0.94435
9.08333	2.51095	9.08333	2.9316	9.0835	0.927	9.08367	0.697101	9.08367	1.04115	9.08333	1.367	9.08367	1.2842	9.08367	0.9438
9.09167	2.4481	9.09167	2.865	9.09183	0.9382	9.092	0.695151	9.092	1.0419	9.09167	1.3841	9.092	1.2829	9.092	0.9433
9.1	2.38105	9.1	2.79665	9.10017	0.9514	9.10033	0.694301	9.10033	1.0414	9.1	1.39735	9.10033	1.28225	9.10033	0.9433
9.10833	2.3208	9.10833	2.73125	9.1085	0.95235	9.10867	0.692301	9.10867	1.0399	9.10833	1.3982	9.10867	1.285	9.10867	0.9438
9.11667	2.2582	9.11667	2.66655	9.11683	0.95475	9.117	0.688901	9.117	1.04145	9.11667	1.40545	9.117	1.2994	9.117	0.9431
9.125	2.19695	9.125	2.60335	9.12517	0.9525	9.12533	0.690501	9.12533	1.04245	9.125	1.406	9.12533	1.30935	9.12533	0.94155
9.13333	2.13605	9.13333	2.54065	9.1335	0.9482	9.13367	0.695401	9.13367	1.04245	9.13333	1.39925	9.13367	1.31075	9.13367	0.94305
9.14167	2.07625	9.14167	2.4785	9.14183	0.9395	9.142	0.714951	9.142	1.041	9.14167	1.38775	9.142	1.31015	9.142	0.9405
9.15	2.01795	9.15	2.41825	9.15017	0.9268	9.15033	0.734801	9.15033	1.0423	9.15	1.37095	9.15033	1.31075	9.15033	0.94075
9.15833	1.96115	9.15833	2.3583	9.1585	0.9139	9.15867	0.746051	9.15867	1.041	9.15833	1.3571	9.15867	1.31075	9.15867	0.9411
9.16667	1.90055	9.16667	2.29855	9.16683	0.89965	9.167	0.748201	9.167	1.0389	9.16667	1.33965	9.167	1.3032	9.167	0.9389
9.175	1.8358	9.175	2.24095	9.17517	0.8853	9.17533	0.751851	9.17533	1.03945	9.175	1.3255	9.17533	1.29155	9.17533	0.9404
9.18333	1.78975	9.18333	2.1849	9.1835	0.87385	9.18367	0.754701	9.18367	1.0395	9.18333	1.31155	9.18367	1.2772	9.18367	0.9414
9.19167	1.73355	9.19167	2.12945	9.19183	0.86205	9.192	0.746251	9.192	1.03695	9.19167	1.293	9.192	1.2648	9.192	0.93925
9.2	1.6814	9.2	2.0737	9.20017	0.8361	9.20033	0.737001	9.20033	1.0344	9.2	1.2204	9.20033	1.2512	9.20033	0.9417
9.20833	1.63225	9.20833	2.02135	9.2085	0.77705	9.20867	0.721701	9.20867	1.0328	9.20833	1.28775	9.20867	1.2406	9.20867	0.9334
9.21667	1.5833	9.21667	1.9698	9.21683	1.07965	9.217	0.709151	9.217	1.0311	9.21667	2.1969	9.217	1.22925	9.217	0.9402
9.225	1.5309	9.225	1.9193	9.22517	2.2988	9.22533	0.695751	9.22533	1.029	9.225	3.91065	9.22533	1.2172	9.22533	0.9411
9.23333	1.4835	9.23333	1.87005	9.2335	4.0441	9.23367	0.685401	9.23367	1.02595	9.23333	5.6875	9.23367	1.1761	9.23367	0.9411
9.24167	1.43705	9.24167	1.82445	9.24183	5.67975	9.242	0.674751	9.242	1.0244	9.24167	7.1195	9.242	1.1376	9.242	0.9405
9.25	1.393	9.25	1.77735	9.25017	6.95785	9.25033	0.665751	9.25033	1.02075	9.25	8.16855	9.25033	1.64235	9.25033	0.93865
9.25833	1.34975	9.25833	1.73285	9.2585	7.88195	9.25867	0.659701	9.25867	1.0191	9.25833	8.9083	9.25867	3.0107	9.25867	0.93715
9.26667	1.3088	9.26667	1.6896	9.26683	8.54475	9.267	0.640051	9.267	1.0216	9.26667	9.44945	9.267	4.7222	9.267	0.9356
9.275	1.27	9.275	1.6493	9.27517	9.03	9.27533	0.575101	9.27533	1.01465	9.275	9.85385	9.27533	6.24795	9.27533	0.9332
9.28333	1.23015	9.28333	1.6072	9.2835	9.40295	9.28367	0.783651	9.28367	1.0141	9.28333	10.1674	9.28367	7.4224	9.28367	0.92965
9.29167	1.1939	9.29167	1.56745	9.29183	9.7036	9.292	1.94165	9.292	1.01265	9.29167	10.4299	9.292	8.2759	9.292	0.9268
9.3	1.15595	9.3	1.53115	9.30017	9.95925	9.30033	3.7758	9.30033	1.01085	9.3	10.6892	9.30033	8.89785	9.30033	0.92295
9.30833	1.1203	9.30833	1.4923	9.3085	10.2088	9.30867	5.4984	9.30867	1.01105	9.30833	10.9465	9.30867	9.35885	9.30867	0.921
9.31667	1.0879	9.31667	1.45625	9.31683	10.4555	9.317	6.8259	9.317	1.00985	9.31667	11.1687	9.317	9.71565	9.317	0.9187
9.325	1.0538	9.325	1.42435	9.32517	10.6714	9.32533	7.77475	9.32533	1.0096	9.325	11.3459	9.32533	10.0035	9.32533	0.92145
9.33333	1.02375	9.33333	1.39	9.3335	10.8392	9.33367	8.4483	9.33367	1.0104	9.33333	11.4784	9.33367	10.2569	9.33367	0.92495
9.34167	0.99455	9.34167	1.36075	9.34183	10.9624	9.342	8.9357	9.342	1.00655	9.34167	11.5699	9.342	10.5145	9.342	0.92815
9.35	0.96565	9.35	1.3304	9.35017	11.0523	9.35033	9.30775	9.35033	1.00655	9.35	11.6406	9.35033	10.763	9.35033	0.93705
9.35833	0.93805	9.35833	1.30145	9.3585	11.1182	9.35867	9.596	9.35867	1.0064	9.35833	11.693	9.35867	10.9762	9.35867	0.9479
9.36667	0.91145	9.36667	1.27255	9.36683	11.1665	9.367	9.85035	9.367	1.0058	9.36667	11.7343	9.367	11.1377	9.367	0.96485
9.375	0.8867	9.375	1.2487	9.37517	11.2052	9.37533	10.1107	9.37533	1.0057	9.375	11.7635	9.37533	11.2555	9.37533	0.98535
9.38333	0.8648	9.38333	1.22325	9.3835	11.2357	9.38367	10.3537	9.38367	1.00555	9.38333	11.7881	9.38367	11.3395	9.38367	1.0104
9.39167	0.84015	9.39167	1.19815	9.39183	11.2608	9.392	10.5543	9.392	1.00655	9.39167	11.8102	9.392	11.4015	9.392	1.03695
9.4	0.81755	9.4	1.17275	9.40017	11.2799	9.40033	10.7007	9.40033	1.00535	9.4	11.826	9.40033	11.4497	9.40033	1.0642
9.40833	0.7942	9.40833	1.149	9.4085	11.2954	9.40867	10.8081	9.40867	1.0058	9.40833	11.836	9.40867	11.4845	9.40867	1.0909
9.41667	0.77375	9.41667	1.12755	9.41683	11.3092	9.417	10.8828	9.417	1.0045	9.41667	11.8466	9.417	11.5124	9.417	1.1153
9.425	0.75375	9.425	1.10705	9.42517	11.3185	9.42533	10.939	9.42533	1.0039	9.425	11.8528	9.42533	11.536	9.42533	1.1346
9.43333	0.73395	9.43333	1.08535	9.4335	11.3273	9.43367	10.9788	9.43367	1.0047	9.43333	11.859	9.43367	11.5541	9.43367	1.1469
9.44167	0.71675	9.44167	1.065	9.44183	11.3318	9.442	11.0125	9.442	1.0039	9.44167	11.8599	9.442	11.5666	9.442	1.15115
9.45	0.69955	9.45	1.04785	9.45017	11.3353	9.45033	11.0363	9.45033	1.00535	9.45	11.8615	9.45033	11.5787	9.45033	1.14855
9.45833	0.6828	9.45833	1.0289	9.4585	11.3385	9.45867	11.0566	9.45867	1.0044	9.45833	11.8619	9.45867	11.5868	9.45867	1.14095
9.46667	0.66575	9.46667	1.01305	9.46683	11.337	9.467	11.072	9.467	1.00365	9.46667	11.8596	9.467	11.5904	9.467	1.12495
9.475	0.65185	9.475	0.9948	9.47517	11.3362	9.47533	11.0855	9.47533	1.00705	9.475	11.8558	9.47533	11.5951	9.47533	1.127
9.48333	0.6361	9.48333	0.9779	9.4835	11.3345	9.48367	11.0936	9.48367	1.00395	9.48333	11.8519	9.48367	11.594	9.48367	1.0773
9.49167	0.61895	9.49167	0.9619	9.49183	11.3325	9.492	11.1012	9.492	1.0035	9.49167	11.8496	9.492	11.5965	9.492	1.05435
9.5	0.61625	9.5	0.9505	9.50017	11.3274	9.50033	11.106	9.50033	1.0046	9.5	11.8438	9.50033	11.5939	9.50033	1.03085
9.50833	0.5911	9.50833	0.9367	9.5085	11.3213	9.50867	11.1082	9.50867	1.00215	9.50833	11.8354	9.50867	11.5917	9.50867	1.0064
9.51667	0.5858	9.51667	0.92245	9.51683	11.3162	9.517	11.1098	9.517	1.0012	9.51667	11.8284	9.517	11.5878	9.517	0.9863
9.525	0.57275	9.525	0.90925	9.52517	11.3118	9.52533	11.1093	9.52533	1.0028	9.525	11.8229	9.52533	11.5829	9.52533	0.968
9.53333	0.5751	9.53333	0.8956	9.5335	11.3038	9.53367	11.1087	9.53367	1.0036	9.53333	11.8122	9.53367	11.5766	9.53367	0.95405
9.54167	0.5448	9.54167	0.8849	9.54183	11.295	9.542	11.1036	9.542	1.0028	9.54167	11.8019	9.542	11.5686	9.542	0.93985
9.55	0.5424	9.55	0.87075	9.55017	11.2896	9.55033	11.0999	9.55033	1.00375	9.55	11.7933	9.55033	11.5643	9.55033	0.93055
9.55833	0.53215	9.55833	0.8605	9.5585	11.2804	9.55867	11.0955	9.55867	1.00585	9.55833	11.7858	9.55867	11.5559	9.55867	0.9244
9.56667	0.5251	9.56667	0.8503	9.56683	11.2704	9.567	11.0889	9.567	1.00575	9.56667	11.772	9.567	11.5467	9.567	0.91695
9.575	0.51605	9.575	0.84005	9.57517	11.2613	9.57533	11.0818	9.57533	1.00515	9.575	11.7619	9.57533	11.5372	9.57533	0.91275
9.58333	0.5089	9.58333	0.8291	9.5835	11.2526	9.58367	11.0741	9.58367	1.00435	9.58333	11.7487	9.58367	11.5275	9.58367	0.9102
9.59167	0.50025	9.59167	0.81955	9.59183	11.2432	9.592	11.0652	9.592	1.00325	9.59167	11.74	9.592	11.519	9.592	0.90715
9.6	0.49115	9.6	0.81245	9.60017	11.2299	9.60033	11.0549	9.60033	1.004	9.6	11.7242	9.60033	11.5074	9.60033	0.904
9.60833	0.48545	9.60833	0.8019	9.6085	11.2196	9.60867	11.0457	9.60867	1.00475	9.60833	11.7119	9.60867	11.4945	9.60867	0.9037
9.61667	0.4774	9.61667	0.79145	9.61683	11.2071	9.617	11.0343	9.617	1.0026	9.61667	11.6969	9.617	11.4832	9.617	0.90265
9.625	0.4707	9.625	0.7825	9.62517	11.1948	9.62533	11.0212	9.62533	1.0029	9.625	11.6833	9.62533	11.4722	9.62533	0.90265
9.63333	0.4662	9.63333	0.77745	9.6335	11.1804	9.63367	11.0109	9.63367	1.00165	9.63333	11.6702	9.63367	11.4579	9.63367	0.90435
9.64167	0.4582	9.64167	0.7667	9.64183	11.1686	9.642	10.997	9.642	0.9996	9.64167	11.6537	9.642	11.4423	9.642	0.9047
9.65	0.45435	9.65	0.7608	9.65017	11.1529	9.65033	10.9843	9.65033	1.0026	9.65	11.6376	9.65033	11.4287	9.65033	0.9089
9.65833	0.44865	9.65833	0.75235	9.6585	11.1389	9.65867	10.9684	9.65867	1.00295	9.65833	11.6222	9.65867	11.4146	9.65867	0.91575
9.66667	0.4425	9.66667	0.7473	9.66683	11.1235	9.667	10.9555	9.667	1.0021	9.66667	11.6062	9.667	11.3982	9.667	0.93245
9.675	0.43755	9.675	0.7415	9.67517	11.1087	9.67533	10.9399	9.67533	1.0019	9.675	11.5893	9.67533	11.3836	9.67533	0.97925
9.68333	0.43195	9.68333	0.7344	9.6835	11.0938	9.68367	10.9269	9.68367	1.00355	9.68333	11.5729	9.68367	11.3704	9.68367	1.0856
9.69167	0.4282	9.69167	0.7276	9.69183	11.0775	9.692	10.909	9.692	1.0059	9.69167	11.5528	9.692	11.3516	9.692	1.2276
9.7	0.4234	9.7	0.7222	9.70017	11.0616	9.70033	10.8934	9.70033	1.00595	9.7	11.5358	9.70033	11.3347	9.70033	1.3142
9.70833	0.42015	9.70833	0.7174	9.7085	11.0436	9.70867	10.8772	9.70867	1.0066	9.70833	11.5186	9.70867	11.3175	9.70867	1.3381
9.71667	0.41655	9.71667	0.70985	9.71683	11.0281	9.717	10.8595	9.717	1.0087	9.71667	11.4994	9.717	11.3008	9.717	1.329
9.725	0.4109	9.725	0.70585	9.72517	11.0088	9.72533	10.8427	9.72533	1.0119	9.725	11.4787	9.72533	11.2822	9.72533	1.3059
9.73333	0.4079	9.73333	0.69975	9.7335	10.9929	9.73367	10.8257	9.73367	1.014	9.73333	11.4596	9.73367	11.2668	9.73367	1.2858
9.74167	0.4037	9.74167	0.69345	9.74183	10.9723	9.742	10.8067	9.742	1.0199	9.74167	11.4385	9.742	11.2448	9.742	1.2781
9.75	0.4009	9.75	0.69265	9.75017	10.9555	9.75033	10.7867	9.75033	1.0274	9.75	11.4196	9.75033	11.2282	9.75033	1.22295
9.75833	0.39785	9.75833	0.68555	9.7585	10.9354	9.75867	10.7681	9.75867	1.03545	9.75833	11.3973	9.75867	11.2052	9.75867	1.21475
9.76667	0.39355	9.76667	0.6795	9.76683	10.9157	9.767	10.7469	9.767	1.0497	9.76667	11.3782	9.767	11.1873	9.767	1.59225
9.775	0.3925	9.775	0.6767	9.77517	10.8942	9.77533	10.7312	9.77533	1.0773	9.775	11.3547	9.77533	11.1649	9.77533	2.2507
9.78333	0.38875	9.78333	0.6746	9.7835	10.8751	9.78367	10.71	9.78367	1.1172	9.78333	11.3335	9.78367	11.1438	9.78367	2.88065
9.79167	0.3857	9.79167	0.6701	9.79183	10.8534	9.792	10.6901	9.792	1.1413	9.79167	11.3121	9.792	11.1233	9.792	3.38055
9.8	0.38135	9.8	0.66645	9.80017	10.8328	9.80033	10.6688	9.80033	1.14785	9.8	11.2889	9.80033	11.1009	9.80033	3.7605
9.80833	0.3795	9.80833	0.66245	9.8085	10.811	9.80867	10.6489	9.80867	1.1457	9.80833	11.2657	9.80867	11.078	9.80867	4.04195
9.81667	0.37725	9.81667	0.65975	9.81683	10.7902	9.817	10.6282	9.817	1.14535	9.81667	11.2436	9.817	11.0567	9.817	4.2839
9.825	0.37495	9.825	0.65525	9.82517	10.7668	9.82533	10.6068	9.82533	1.14525	9.825	11.22	9.82533	11.0317	9.82533	4.51615
9.83333	0.3712	9.83333	0.6517	9.8335	10.7469	9.83367	10.5854	9.83367	1.15265	9.83333	11.1979	9.83367	11.0093	9.83367	4.717
9.84167	0.3714	9.84167	0.6522	9.84183	10.7208	9.842	10.5645	9.842	1.15465	9.84167	11.1738	9.842	10.9843	9.842	4.8632
9.85	0.3661	9.85	0.64715	9.85017	10.6984	9.85033	10.5405	9.85033	1.13955	9.85	11.1502	9.85033	10.9593	9.85033	4.965
9.85833	0.3663	9.85833	0.6468	9.8585	10.676	9.85867	10.5196	9.85867	1.10425	9.85833	11.1265	9.85867	10.9368	9.85867	5.0314
9.86667	0.36445	9.86667	0.6424	9.86683	10.6535	9.867	10.4964	9.867	1.11195	9.86667	11.1038	9.867	10.9129	9.867	5.07675
9.875	0.36275	9.875	0.64085	9.87517	10.6292	9.87533	10.4733	9.87533	1.42155	9.875	11.0786	9.87533	10.8881	9.87533	5.1084
9.88333	0.36155	9.88333	0.64065	9.8835	10.606	9.88367	10.4497	9.88367	2.01245	9.88333	11.0546	9.88367	10.8634	9.88367	5.132
9.89167	0.3594	9.89167	0.63735	9.89183	10.5823	9.892	10.4263	9.892	2.615	9.89167	11.0313	9.892	10.8372	9.892	5.1502
9.9	0.35725	9.9	0.6352	9.90017	10.5596	9.90033	10.404	9.90033	3.10445	9.9	11.0062	9.90033	10.8111	9.90033	5.1626
9.90833	0.35465	9.90833	0.6344	9.9085	10.5332	9.90867	10.3814	9.90867	3.4825	9.90833	10.9815	9.90867	10.7859	9.90867	5.17195
9.91667	0.3541	9.91667	0.6335	9.91683	10.5085	9.917	10.3546	9.917	3.7636	9.91667	10.9562	9.917	10.7613	9.917	5.1768
9.925	0.3523	9.925	0.63435	9.92517	10.4843	9.92533	10.3305	9.92533	3.9951	9.925	10.9334	9.92533	10.7355	9.92533	5.18055
9.93333	0.3497	9.93333	0.63265	9.9335	10.458	9.93367	10.3052	9.93367	4.2158	9.93333	10.9069	9.93367	10.7081	9.93367	5.1821
9.94167	0.3467	9.94167	0.6324	9.94183	10.4342	9.942	10.2779	9.942	4.411	9.94167	10.8814	9.942	10.6822	9.942	5.1831
9.95	0.34605	9.95	0.63145	9.95017	10.4056	9.95033	10.2556	9.95033	4.55895	9.95	10.8526	9.95033	10.6516	9.95033	5.1828
9.95833	0.34655	9.95833	0.633	9.9585	10.3779	9.95867	10.2284	9.95867	4.662	9.95833	10.8271	9.95867	10.623	9.95867	5.1854
9.96667	0.34635	9.96667	0.63395	9.96683	10.353	9.967	10.2055	9.967	4.7275	9.96667	10.7996	9.967	10.5963	9.967	5.18275
9.975	0.3439	9.975	0.6343	9.97517	10.3247	9.97533	10.1779	9.97533	4.77105	9.975	10.7728	9.97533	10.5682	9.97533	5.1814
9.98333	0.34275	9.98333	0.6352	9.9835	10.2934	9.98367	10.1542	9.98367	4.80345	9.98333	10.7421	9.98367	10.5341	9.98367	5.182
9.99167	0.3416	9.99167	0.63505	9.99183	10.2827	9.992	10.1244	9.992	4.82315	9.99167	10.7284	9.992	10.5219	9.992	5.18025
10	0.3425	10	0.63605	10.0002	10.2353	10.0003	10.0976	10.0003	4.8388	10	10.683	10.0003	10.4744	10.0003	5.18005
10.0083	0.3414	10.0083	0.6361	10.0085	10.2119	10.0087	10.0704	10.0087	4.85165	10.0083	10.6606	10.0087	10.451	10.0087	5.1805
10.0167	0.3409	10.0167	0.6356	10.0168	10.1814	10.017	10.0434	10.017	4.85775	10.0167	10.6293	10.017	10.4184	10.017	5.2073
10.025	0.33955	10.025	0.6375	10.0252	10.1538	10.0253	10.0139	10.0253	4.8622	10.025	10.6001	10.0253	10.3898	10.0253	5.17335
10.0333	0.33695	10.0333	0.6374	10.0335	10.1221	10.0337	9.988	10.0337	4.86285	10.0333	10.5694	10.0337	10.3582	10.0337	5.17425
10.0417	0.3385	10.0417	0.6365	10.0418	10.0908	10.042	9.9581	10.042	4.86015	10.0417	10.5374	10.042	10.3255	10.042	5.17095
10.05	0.339	10.05	0.6363	10.0502	10.0594	10.0503	9.9276	10.0503	4.8647	10.05	10.5077	10.0503	10.2944	10.0503	5.1703
10.0583	0.3362	10.0583	0.63485	10.0585	10.0286	10.0587	9.89885	10.0587	4.85585	10.0583	10.4752	10.0587	10.2629	10.0587	5.16685
10.0667	0.33475	10.0667	0.63565	10.0668	9.99575	10.067	9.8671	10.067	4.85245	10.0667	10.4421	10.067	10.2263	10.067	5.1627
10.075	0.3371	10.075	0.6362	10.0752	9.9631	10.0753	9.83775	10.0753	4.84655	10.075	10.4082	10.0753	10.1927	10.0753	5.1589
10.0833	0.3378	10.0833	0.63665	10.0835	9.92145	10.0837	9.80805	10.0837	4.8436	10.0833	10.3677	10.0837	10.1518	10.0837	5.155
10.0917	0.33625	10.0917	0.63665	10.0918	9.8966	10.092	9.77615	10.092	4.8406	10.0917	10.3424	10.092	10.1241	10.092	5.14835
10.1	0.33555	10.1	0.6368	10.1002	9.8609	10.1003	9.74515	10.1003	4.8363	10.1	10.3066	10.1003	10.0872	10.1003	5.14265
10.1083	0.33645	10.1083	0.63705	10.1085	9.8252	10.1087	9.7176	10.1087	4.83175	10.1083	10.2692	10.1087	10.0503	10.1087	5.13525
10.1167	0.3363	10.1167	0.6386	10.1168	9.8017	10.117	9.68375	10.117	4.8296	10.1167	10.2458	10.117	10.0262	10.117	5.12905
10.125	0.3382	10.125	0.64075	10.1252	9.74355	10.1253	9.6525	10.1253	4.8281	10.125	10.1851	10.1253	9.96685	10.1253	5.1223
10.1333	0.33795	10.1333	0.6417	10.1335	9.69325	10.1337	9.62125	10.1337	4.824	10.1333	10.1377	10.1337	9.91695	10.1337	5.11315
10.1417	0.34305	10.1417	0.64725	10.1418	9.79765	10.142	9.59015	10.142	4.822	10.1417	10.2405	10.142	10.0176	10.142	5.1093
10.15	0.3439	10.15	0.64985	10.1502	9.54345	10.1503	9.5577	10.1503	4.81785	10.15	9.9832	10.1503	9.7606	10.1503	5.1023
10.1583	0.3477	10.1583	0.6553	10.1585	9.60095	10.1587	9.5236	10.1587	4.8139	10.1583	10.0424	10.1587	9.81795	10.1587	5.09615
10.1667	0.35115	10.1667	0.6597	10.1668	9.5653	10.167	9.49145	10.167	4.809	10.1667	10.0051	10.167	9.7785	10.167	5.08685
10.175	0.35395	10.175	0.6698	10.1752	9.51265	10.1753	9.4557	10.1753	4.80415	10.175	9.95115	10.1753	9.72415	10.1753	5.08045
10.1833	0.36085	10.1833	0.67685	10.1835	9.46695	10.1837	9.4224	10.1837	4.79795	10.1833	9.90165	10.1837	9.67445	10.1837	5.0723
10.1917	0.36765	10.1917	0.6855	10.1918	9.42415	10.192	9.38675	10.192	4.7927	10.1917	9.8617	10.192	9.6328	10.192	5.0646
10.2	0.37415	10.2	0.69555	10.2002	9.37785	10.2003	9.35335	10.2003	4.78585	10.2	9.8131	10.2003	9.58	10.2003	5.0566
10.2083	0.3837	10.2083	0.70865	10.2085	9.33005	10.2087	9.3162	10.2087	4.77995	10.2083	9.7645	10.2087	9.53075	10.2087	5.04935
10.2167	0.3955	10.2167	0.721	10.2168	9.2831	10.217	9.27835	10.217	4.7738	10.2167	9.7159	10.217	9.48015	10.217	5.0429
10.225	0.40405	10.225	0.73505	10.2252	9.2335	10.2253	9.2384	10.2253	4.7662	10.225	9.6653	10.2253	9.42665	10.2253	5.034
10.2333	0.41655	10.2333	0.74795	10.2335	9.18215	10.2337	9.19915	10.2337	4.75905	10.2333	9.60955	10.2337	9.37095	10.2337	5.02415
10.2417	0.43015	10.2417	0.76555	10.2418	9.13205	10.242	9.1566	10.242	4.75145	10.2417	9.56	10.242	9.31845	10.242	5.01645
10.25	0.4451	10.25	0.78295	10.2502	9.07825	10.2503	9.11275	10.2503	4.7439	10.25	9.50405	10.2503	9.26045	10.2503	5.0047
10.2583	0.46095	10.2583	0.7979	10.2585	9.022	10.2587	9.0683	10.2587	4.7356	10.2583	9.4457	10.2587	9.20085	10.2587	4.99445
10.2667	0.4802	10.2667	0.81495	10.2668	8.97	10.267	9.0198	10.267	4.72675	10.2667	9.39245	10.267	9.1446	10.267	4.9839
10.275	0.49635	10.275	0.83375	10.2752	8.91205	10.2753	8.9698	10.2753	4.71585	10.275	9.33515	10.2753	9.08385	10.2753	4.9722
10.2833	0.51595	10.2833	0.852201	10.2835	8.85335	10.2837	8.91785	10.2837	4.70685	10.2833	9.27525	10.2837	9.02115	10.2837	4.9589
10.2917	0.53575	10.2917	0.869651	10.2918	8.79625	10.292	8.86365	10.292	4.6949	10.2917	9.21505	10.292	8.96015	10.292	4.9356
10.3	0.5523	10.3	0.885401	10.3002	8.73585	10.3003	8.8088	10.3003	4.6855	10.3	9.15385	10.3003	8.89675	10.3003	4.9284
10.3083	0.5706	10.3083	0.900851	10.3085	8.67615	10.3087	8.7489	10.3087	4.67525	10.3083	9.093	10.3087	8.8324	10.3087	4.9161
10.3167	0.5924	10.3167	0.919651	10.3168	8.6135	10.317	8.6895	10.317	4.6639	10.3167	9.03045	10.317	8.76685	10.317	4.90145
10.325	0.6085	10.325	0.934851	10.3252	8.5476	10.3253	8.6239	10.3253	4.6517	10.325	8.96395	10.3253	8.6977	10.3253	4.88585
10.3333	0.62595	10.3333	0.949451	10.3335	8.48435	10.3337	8.5628	10.3337	4.63955	10.3333	8.9002	10.3337	8.62875	10.3337	4.86945
10.3417	0.644	10.3417	0.961551	10.3418	8.41995	10.342	8.4938	10.342	4.6286	10.3417	8.83345	10.342	8.5609	10.342	4.8561
10.35	0.65995	10.35	0.975051	10.3502	8.34965	10.3503	8.42785	10.3503	4.61425	10.35	8.76485	10.3503	8.49	10.3503	4.83745
10.3583	0.67465	10.3583	0.987501	10.3585	8.28415	10.3587	8.3587	10.3587	4.602	10.3583	8.69635	10.3587	8.4172	10.3587	4.8213
10.3667	0.6915	10.3667	0.999701	10.3668	8.21355	10.367	8.2867	10.367	4.5897	10.3667	8.6251	10.367	8.34465	10.367	4.80705
10.375	0.7036	10.375	1.00785	10.3752	8.1446	10.3753	8.2137	10.3753	4.5764	10.375	8.55555	10.3753	8.27	10.3753	4.7892
10.3833	0.7178	10.3833	1.02045	10.3835	8.07325	10.3837	8.1384	10.3837	4.56285	10.3833	8.48395	10.3837	8.1947	10.3837	4.77335
10.3917	0.73055	10.3917	1.0279	10.3918	7.99965	10.392	8.0627	10.392	4.5477	10.3917	8.4092	10.392	8.11755	10.392	4.7558
10.4	0.73855	10.4	1.035	10.4002	7.92535	10.4003	7.98645	10.4003	4.53465	10.4	8.3337	10.4003	8.0405	10.4003	4.7392
10.4083	0.75085	10.4083	1.04235	10.4085	7.85215	10.4087	7.9083	10.4087	4.5208	10.4083	8.2603	10.4087	7.96235	10.4087	4.7234
10.4167	0.76025	10.4167	1.048	10.4168	7.7754	10.417	7.8266	10.417	4.50815	10.4167	8.1847	10.417	7.88045	10.417	4.7084
10.425	0.7695	10.425	1.056	10.4252	7.7012	10.4253	7.7454	10.4253	4.4944	10.425	8.10645	10.4253	7.79935	10.4253	4.6897
10.4333	0.775351	10.4333	1.0609	10.4335	7.62135	10.4337	7.6631	10.4337	4.48125	10.4333	8.0272	10.4337	7.71635	10.4337	4.6715
10.4417	0.782451	10.4417	1.0652	10.4418	7.54165	10.442	7.5794	10.442	4.46735	10.4417	7.95055	10.442	7.6361	10.442	4.65535
10.45	0.788951	10.45	1.06755	10.4502	7.46075	10.4503	7.49375	10.4503	4.45475	10.45	7.86785	10.4503	7.54875	10.4503	4.6405
10.4583	0.792851	10.4583	1.0684	10.4585	7.38205	10.4587	7.40795	10.4587	4.4418	10.4583	7.7889	10.4587	7.4645	10.4587	4.62245
10.4667	0.797751	10.4667	1.07325	10.4668	7.29675	10.467	7.3234	10.467	4.42725	10.4667	7.7071	10.467	7.3787	10.467	4.60545
10.475	0.799551	10.475	1.07405	10.4752	7.21395	10.4753	7.23635	10.4753	4.41455	10.475	7.6243	10.4753	7.2898	10.4753	4.58875
10.4833	0.801351	10.4833	1.07355	10.4835	7.1315	10.4837	7.1458	10.4837	4.3999	10.4833	7.54165	10.4837	7.2018	10.4837	4.57175
10.4917	0.797601	10.4917	1.06635	10.4918	7.04495	10.492	7.055	10.492	4.38725	10.4917	7.45845	10.492	7.112	10.492	4.5558
10.5	0.795601	10.5	1.0645	10.5002	6.9577	10.5003	6.96495	10.5003	4.37315	10.5	7.3712	10.5003	7.0211	10.5003	4.53815
10.5083	0.792351	10.5083	1.0588	10.5085	6.8739	10.5087	6.8756	10.5087	4.3592	10.5083	7.2845	10.5087	6.9282	10.5087	4.52085
10.5167	0.784101	10.5167	1.05105	10.5168	6.78185	10.517	6.7856	10.517	4.34535	10.5167	7.19445	10.517	6.8347	10.517	4.5062
10.525	0.775501	10.525	1.0414	10.5252	6.689	10.5253	6.6932	10.5253	4.3301	10.525	7.1047	10.5253	6.7402	10.5253	4.4899
10.5333	0.761951	10.5333	1.0273	10.5335	6.59715	10.5337	6.5978	10.5337	4.3154	10.5333	7.01495	10.5337	6.6465	10.5337	4.4716
10.5417	0.748151	10.5417	1.01295	10.5418	6.5045	10.542	6.506	10.542	4.3007	10.5417	6.9239	10.542	6.5503	10.542	4.4534
10.55	0.734301	10.55	0.997851	10.5502	6.4133	10.5503	6.4127	10.5503	4.28605	10.55	6.83205	10.5503	6.45365	10.5503	4.43645
10.5583	0.71555	10.5583	0.978801	10.5585	6.3196	10.5587	6.3182	10.5587	4.26965	10.5583	6.7388	10.5587	6.3552	10.5587	4.41865
10.5667	0.6949	10.5667	0.958451	10.5668	6.22465	10.567	6.22135	10.567	4.25335	10.5667	6.64225	10.567	6.2573	10.567	4.40065
10.575	0.67065	10.575	0.936201	10.5752	6.1307	10.5753	6.1252	10.5753	4.2354	10.575	6.5492	10.5753	6.1589	10.5753	4.38495
10.5833	0.6504	10.5833	0.913951	10.5835	6.0335	10.5837	6.02745	10.5837	4.21805	10.5833	6.45455	10.5837	6.0599	10.5837	4.3674
10.5917	0.6241	10.5917	0.890651	10.5918	5.935	10.592	5.92865	10.592	4.20055	10.5917	6.3581	10.592	5.95965	10.592	4.34895
10.6	0.6032	10.6	0.866201	10.6002	5.8375	10.6003	5.8321	10.6003	4.18365	10.6	6.2602	10.6003	5.85915	10.6003	4.33105
10.6083	0.5799	10.6083	0.845301	10.6085	5.7385	10.6087	5.7325	10.6087	4.16525	10.6083	6.1606	10.6087	5.758	10.6087	4.31195
10.6167	0.55115	10.6167	0.820501	10.6168	5.64185	10.617	5.63325	10.617	4.1457	10.6167	6.0645	10.617	5.65975	10.617	4.2924
10.625	0.52725	10.625	0.795351	10.6252	5.54045	10.6253	5.5331	10.6253	4.12695	10.625	5.9656	10.6253	5.559	10.6253	4.27445
10.6333	0.5072	10.6333	0.775201	10.6335	5.4413	10.6337	5.43225	10.6337	4.10935	10.6333	5.86365	10.6337	5.45825	10.6337	4.25695
10.6417	0.48275	10.6417	0.751751	10.6418	5.34155	10.642	5.33245	10.642	4.08715	10.6417	5.7668	10.642	5.3596	10.642	4.23825
10.65	0.4671	10.65	0.732151	10.6502	5.2418	10.6503	5.23445	10.6503	4.06615	10.65	5.66535	10.6503	5.26005	10.6503	4.2188
10.6583	0.4484	10.6583	0.713901	10.6585	5.1404	10.6587	5.1331	10.6587	4.04665	10.6583	5.567	10.6587	5.1602	10.6587	4.19925
10.6667	0.4316	10.6667	0.696601	10.6668	5.0424	10.667	5.0327	10.667	4.02385	10.6667	5.46775	10.667	5.0636	10.667	4.17885
10.675	0.41655	10.675	0.681751	10.6752	4.943	10.6753	4.9326	10.6753	4.00055	10.675	5.36825	10.6753	4.96535	10.6753	4.15735
10.6833	0.4026	10.6833	0.668001	10.6835	4.8443	10.6837	4.8341	10.6837	3.9787	10.6833	5.2692	10.6837	4.87065	10.6837	4.13745
10.6917	0.39135	10.6917	0.65565	10.6918	4.7462	10.692	4.73345	10.692	3.95565	10.6917	5.17055	10.692	4.77515	10.692	4.11505
10.7	0.3822	10.7	0.64595	10.7002	4.6504	10.7003	4.638	10.7003	3.9331	10.7	5.07385	10.7003	4.68045	10.7003	4.0941
10.7083	0.37775	10.7083	0.63955	10.7085	4.552	10.7087	4.5404	10.7087	3.9097	10.7083	4.97415	10.7087	4.58745	10.7087	4.0729
10.7167	0.36515	10.7167	0.63025	10.7168	4.45665	10.717	4.4432	10.717	3.88415	10.7167	4.87585	10.717	4.4946	10.717	4.0513
10.725	0.3587	10.725	0.6245	10.7252	4.36055	10.7253	4.3489	10.7253	3.85915	10.725	4.77855	10.7253	4.40545	10.7253	4.0277
10.7333	0.35445	10.7333	0.61985	10.7335	4.26725	10.7337	4.25395	10.7337	3.8331	10.7333	4.68215	10.7337	4.31555	10.7337	4.0044
10.7417	0.35045	10.7417	0.61805	10.7418	4.17465	10.742	4.1598	10.742	3.8057	10.7417	4.58465	10.742	4.2268	10.742	3.97995
10.75	0.34375	10.75	0.61605	10.7502	4.08245	10.7503	4.0682	10.7503	3.7806	10.75	4.49225	10.7503	4.1429	10.7503	3.95675
10.7583	0.3415	10.7583	0.6172	10.7585	3.99115	10.7587	3.97755	10.7587	3.75295	10.7583	4.39875	10.7587	4.0583	10.7587	3.9308
10.7667	0.33815	10.7667	0.617	10.7668	3.90605	10.767	3.88665	10.767	3.7279	10.7667	4.3082	10.767	3.97685	10.767	3.90755
10.775	0.3368	10.775	0.61895	10.7752	3.8184	10.7753	3.79675	10.7753	3.70145	10.775	4.21705	10.7753	3.89585	10.7753	3.8818
10.7833	0.33565	10.7833	0.6227	10.7835	3.7344	10.7837	3.7105	10.7837	3.67235	10.7833	4.1288	10.7837	3.8173	10.7837	3.8533
10.7917	0.32975	10.7917	0.62555	10.7918	3.65245	10.792	3.62225	10.792	3.6453	10.7917	4.03915	10.792	3.7391	10.792	3.8252
10.8	0.3281	10.8	0.628601	10.8002	3.57015	10.8003	3.53805	10.8003	3.61855	10.8	3.9552	10.8003	3.66405	10.8003	3.7977
10.8083	0.32725	10.8083	0.637101	10.8085	3.4899	10.8087	3.4539	10.8087	3.58795	10.8083	3.87095	10.8087	3.59065	10.8087	3.7671
10.8167	0.3254	10.8167	0.640701	10.8168	3.4111	10.817	3.372	10.817	3.56015	10.8167	3.7863	10.817	3.5198	10.817	3.73915
10.825	0.3247	10.825	0.648001	10.8252	3.33635	10.8253	3.289	10.8253	3.52835	10.825	3.70665	10.8253	3.4492	10.8253	3.70725
10.8333	0.32335	10.8333	0.654351	10.8335	3.2614	10.8337	3.2087	10.8337	3.5026	10.8333	3.6271	10.8337	3.3801	10.8337	3.6766
10.8417	0.3203	10.8417	0.661151	10.8418	3.18775	10.842	3.13045	10.842	3.4697	10.8417	3.5488	10.842	3.3144	10.842	3.6479
10.85	0.32105	10.85	0.671301	10.8502	3.11825	10.8503	3.05115	10.8503	3.4362	10.85	3.47535	10.8503	3.2496	10.8503	3.613
10.8583	0.32105	10.8583	0.681851	10.8585	3.04775	10.8587	2.97525	10.8587	3.40635	10.8583	3.4024	10.8587	3.1865	10.8587	3.58045
10.8667	0.319	10.8667	0.690351	10.8668	2.9803	10.867	2.89925	10.867	3.3775	10.8667	3.33005	10.867	3.1231	10.867	3.54945
10.875	0.3186	10.875	0.702601	10.8752	2.9148	10.8753	2.8291	10.8753	3.34655	10.875	3.26055	10.8753	3.06435	10.8753	3.51645
10.8833	0.31635	10.8833	0.714101	10.8835	2.8484	10.8837	2.755	10.8837	3.3158	10.8833	3.19385	10.8837	3.005	10.8837	3.4845
10.8917	0.3169	10.8917	0.728301	10.8918	2.7831	10.892	2.68605	10.892	3.28535	10.8917	3.12625	10.892	2.9493	10.892	3.4525
10.9	0.31715	10.9	0.743451	10.9002	2.7258	10.9003	2.61655	10.9003	3.25395	10.9	3.0647	10.9003	2.89475	10.9003	3.42155
10.9083	0.3156	10.9083	0.761801	10.9085	2.6675	10.9087	2.5488	10.9087	3.221	10.9083	3.0048	10.9087	2.8427	10.9087	3.38675
10.9167	0.3152	10.9167	0.780001	10.9168	2.6083	10.917	2.48395	10.917	3.1883	10.9167	2.9458	10.917	2.7896	10.917	3.3524
10.925	0.3122	10.925	0.799451	10.9252	2.55345	10.9253	2.41795	10.9253	3.15695	10.925	2.88765	10.9253	2.7384	10.9253	3.31945
10.9333	0.31275	10.9333	0.826751	10.9335	2.49995	10.9337	2.35815	10.9337	3.12415	10.9333	2.8323	10.9337	2.693	10.9337	3.2859
10.9417	0.3123	10.9417	0.851951	10.9418	2.44675	10.942	2.299	10.942	3.0914	10.9417	2.7788	10.942	2.64545	10.942	3.25335
10.95	0.3107	10.95	0.882151	10.9502	2.39715	10.9503	2.23815	10.9503	3.06	10.95	2.72665	10.9503	2.59845	10.9503	3.22
10.9583	0.3084	10.9583	0.915401	10.9585	2.34555	10.9587	2.17955	10.9587	3.0272	10.9583	2.67725	10.9587	2.5553	10.9587	3.18875
10.9667	0.3078	10.9667	0.957601	10.9668	2.29895	10.967	2.12445	10.967	2.9941	10.9667	2.6281	10.967	2.5132	10.967	3.15385
10.975	0.3074	10.975	1.003	10.9752	2.2527	10.9753	2.07095	10.9753	2.9622	10.975	2.58245	10.9753	2.4721	10.9753	3.11925
10.9833	0.30715	10.9833	1.05445	10.9835	2.2091	10.9837	2.0183	10.9837	2.92795	10.9833	2.5394	10.9837	2.43205	10.9837	3.08555
10.9917	0.3071	10.9917	1.1154	10.9918	2.1656	10.992	1.965	10.992	2.89545	10.9917	2.4946	10.992	2.39385	10.992	3.0503
11	0.3082	11	1.1828	11.0002	2.12425	11.0003	1.9175	11.0003	2.8631	11	2.454	11.0003	2.3571	11.0003	3.0153
11.0083	0.30635	11.0083	1.2593	11.0085	2.085	11.0087	1.8667	11.0087	2.82915	11.0083	2.4132	11.0087	2.3216	11.0087	2.9793
11.0167	0.30635	11.0167	1.3424	11.0168	2.04665	11.017	1.8223	11.017	2.79595	11.0167	2.37745	11.017	2.2868	11.017	2.94595
11.025	0.30655	11.025	1.43005	11.0252	2.01095	11.0253	1.77685	11.0253	2.76225	11.025	2.34155	11.0253	2.25415	11.0253	2.91095
11.0333	0.30535	11.0333	1.5224	11.0335	1.97425	11.0337	1.73325	11.0337	2.72965	11.0333	2.30665	11.0337	2.2224	11.0337	2.8741
11.0417	0.30435	11.0417	1.61315	11.0418	1.9408	11.042	1.6921	11.042	2.69515	11.0417	2.27505	11.042	2.1935	11.042	2.83865
11.05	0.3044	11.05	1.70125	11.0502	1.9099	11.0503	1.65335	11.0503	2.66105	11.05	2.2424	11.0503	2.1637	11.0503	2.8027
11.0583	0.30355	11.0583	1.7797	11.0585	1.8754	11.0587	1.61345	11.0587	2.6271	11.0583	2.21005	11.0587	2.13515	11.0587	2.76685
11.0667	0.3034	11.0667	1.8528	11.0668	1.8451	11.067	1.57455	11.067	2.5956	11.0667	2.1804	11.067	2.10585	11.067	2.73215
11.075	0.3026	11.075	1.91405	11.0752	1.8152	11.0753	1.5417	11.0753	2.55875	11.075	2.1503	11.0753	2.07895	11.0753	2.6934
11.0833	0.3	11.0833	1.9616	11.0835	1.79	11.0837	1.5093	11.0837	2.5252	11.0833	2.1255	11.0837	2.05565	11.0837	2.6579
11.0917	0.30105	11.0917	1.99995	11.0918	1.76205	11.092	1.478	11.092	2.4905	11.0917	2.09885	11.092	2.03115	11.092	2.6221
11.1	0.2987	11.1	2.02155	11.1002	1.73555	11.1003	1.44485	11.1003	2.45315	11.1	2.07495	11.1003	2.0086	11.1003	2.58395
11.1083	0.2989	11.1083	2.03405	11.1085	1.7109	11.1087	1.41565	11.1087	2.4198	11.1083	2.05055	11.1087	1.9836	11.1087	2.54915
11.1167	0.29845	11.1167	2.0328	11.1168	1.6865	11.117	1.388	11.117	2.38535	11.1167	2.025	11.117	1.9611	11.117	2.51265
11.125	0.3009	11.125	2.02195	11.1252	1.66385	11.1253	1.36295	11.1253	2.3503	11.125	2.00405	11.1253	1.9416	11.1253	2.4755
11.1333	0.2998	11.1333	2.001	11.1335	1.64385	11.1337	1.33615	11.1337	2.31485	11.1333	1.98385	11.1337	1.92225	11.1337	2.4392
11.1417	0.30115	11.1417	1.9708	11.1418	1.62105	11.142	1.3146	11.142	2.2827	11.1417	1.962	11.142	1.9034	11.142	2.4038
11.15	0.3014	11.15	1.9378	11.1502	1.60015	11.1503	1.2914	11.1503	2.24925	11.15	1.94245	11.1503	1.8843	11.1503	2.3692
11.1583	0.30185	11.1583	1.8952	11.1585	1.5809	11.1587	1.2695	11.1587	2.2139	11.1583	1.92405	11.1587	1.86705	11.1587	2.33255
11.1667	0.3009	11.1667	1.85115	11.1668	1.56025	11.167	1.24955	11.167	2.1814	11.1667	1.90475	11.167	1.8478	11.167	2.295
11.175	0.298	11.175	1.8022	11.1752	1.54325	11.1753	1.2284	11.1753	2.1462	11.175	1.8871	11.1753	1.83175	11.1753	2.2609
11.1833	0.31445	11.1833	1.75395	11.1835	1.52485	11.1837	1.20975	11.1837	2.1124	11.1833	1.87165	11.1837	1.8159	11.1837	2.22345
11.1917	0.30725	11.1917	1.703	11.1918	1.50695	11.192	1.1948	11.192	2.07915	11.1917	1.8539	11.192	1.7995	11.192	2.18795
11.2	0.2796	11.2	1.6533	11.2002	1.4921	11.2003	1.1754	11.2003	2.04325	11.2	1.83975	11.2003	1.78535	11.2003	2.14945
11.2083	0.293	11.2083	1.59895	11.2085	1.4754	11.2087	1.1589	11.2087	2.01105	11.2083	1.82255	11.2087	1.7705	11.2087	2.116
11.2167	0.29845	11.2167	1.5498	11.2168	1.46125	11.217	1.14485	11.217	1.9796	11.2167	1.80985	11.217	1.7558	11.217	2.08045
11.225	0.30065	11.225	1.5016	11.2252	1.4475	11.2253	1.12845	11.2253	1.947	11.225	1.7962	11.2253	1.74505	11.2253	2.0451
11.2333	0.30015	11.2333	1.45565	11.2335	1.43345	11.2337	1.11485	11.2337	1.9138	11.2333	1.78195	11.2337	1.7317	11.2337	2.0087
11.2417	0.2997	11.2417	1.411	11.2418	1.41975	11.242	1.10235	11.242	1.8817	11.2417	1.7696	11.242	1.72005	11.242	1.9739
11.25	0.3052	11.25	1.36745	11.2502	1.40545	11.2503	1.0883	11.2503	1.84975	11.25	1.7561	11.2503	1.7052	11.2503	1.93875
11.2583	0.34255	11.2583	1.32715	11.2585	1.39425	11.2587	1.07405	11.2587	1.81915	11.2583	1.74425	11.2587	1.69455	11.2587	1.90445
11.2667	0.2953	11.2667	1.28695	11.2668	1.3807	11.267	1.0662	11.267	1.79005	11.2667	1.7331	11.267	1.68205	11.267	1.87325
11.275	0.2963	11.275	1.25125	11.2752	1.36915	11.2753	1.0513	11.2753	1.75805	11.275	1.7214	11.2753	1.67225	11.2753	1.84025
11.2833	0.2862	11.2833	1.2159	11.2835	1.3573	11.2837	1.0427	11.2837	1.72935	11.2833	1.71205	11.2837	1.6606	11.2837	1.8058
11.2917	0.29575	11.2917	1.1854	11.2918	1.344	11.292	1.03075	11.292	1.69565	11.2917	1.69985	11.292	1.6502	11.292	1.7709
11.3	0.2998	11.3	1.1562	11.3002	1.33535	11.3003	1.0204	11.3003	1.66775	11.3	1.68815	11.3003	1.6373	11.3003	1.7381
11.3083	0.29725	11.3083	1.12865	11.3085	1.3238	11.3087	1.0105	11.3087	1.64105	11.3083	1.6776	11.3087	1.63035	11.3087	1.7088
11.3167	0.29765	11.3167	1.10495	11.3168	1.3129	11.317	1.00155	11.317	1.61425	11.3167	1.6692	11.317	1.62035	11.317	1.67855
11.325	0.29865	11.325	1.08225	11.3252	1.30295	11.3253	0.990651	11.3253	1.58735	11.325	1.6581	11.3253	1.6116	11.3253	1.6501
11.3333	0.298	11.3333	1.0569	11.3335	1.29315	11.3337	0.984901	11.3337	1.5625	11.3333	1.6504	11.3337	1.6034	11.3337	1.62095
11.3417	0.29675	11.3417	1.03825	11.3418	1.28375	11.342	0.974351	11.342	1.5387	11.3417	1.64065	11.342	1.5929	11.342	1.59595
11.35	0.29775	11.35	1.0225	11.3502	1.27285	11.3503	0.966101	11.3503	1.5159	11.35	1.631	11.3503	1.58515	11.3503	1.5687
11.3583	0.29655	11.3583	1.00505	11.3585	1.2641	11.3587	0.955251	11.3587	1.49145	11.3583	1.6207	11.3587	1.57495	11.3587	1.54125
11.3667	0.29875	11.3667	0.989801	11.3668	1.2579	11.367	0.947551	11.367	1.46985	11.3667	1.61615	11.367	1.57105	11.367	1.5176
11.375	0.2972	11.375	0.977351	11.3752	1.248	11.3753	0.939201	11.3753	1.45015	11.375	1.60545	11.3753	1.5594	11.3753	1.4925
11.3833	0.2973	11.3833	0.964901	11.3835	1.24015	11.3837	0.932501	11.3837	1.4317	11.3833	1.5973	11.3837	1.5534	11.3837	1.4698
11.3917	0.29445	11.3917	0.951801	11.3918	1.23155	11.392	0.924201	11.392	1.4118	11.3917	1.5893	11.392	1.5452	11.392	1.44835
11.4	0.2944	11.4	0.942751	11.4002	1.2251	11.4003	0.919101	11.4003	1.39415	11.4	1.5835	11.4003	1.5393	11.4003	1.4286
11.4083	0.29505	11.4083	0.936301	11.4085	1.21665	11.4087	0.911101	11.4087	1.377	11.4083	1.57465	11.4087	1.53115	11.4087	1.40765
11.4167	0.29515	11.4167	0.929601	11.4168	1.20955	11.417	0.905001	11.417	1.3601	11.4167	1.56785	11.417	1.52545	11.417	1.3889
11.425	0.2941	11.425	0.921901	11.4252	1.20185	11.4253	0.895301	11.4253	1.3447	11.425	1.56025	11.4253	1.51775	11.4253	1.37075
11.4333	0.2935	11.4333	0.915701	11.4335	1.19745	11.4337	0.892051	11.4337	1.33095	11.4333	1.5535	11.4337	1.51305	11.4337	1.3568
11.4417	0.2925	11.4417	0.910351	11.4418	1.19075	11.442	0.885201	11.442	1.317	11.4417	1.54635	11.442	1.50695	11.442	1.3384
11.45	0.29405	11.45	0.906801	11.4502	1.1825	11.4503	0.881851	11.4503	1.3033	11.45	1.5397	11.4503	1.49915	11.4503	1.3224
11.4583	0.29315	11.4583	0.902101	11.4585	1.17725	11.4587	0.872901	11.4587	1.29175	11.4583	1.53445	11.4587	1.494	11.4587	1.3099
11.4667	0.29215	11.4667	0.898551	11.4668	1.17145	11.467	0.866901	11.467	1.27755	11.4667	1.5272	11.467	1.48745	11.467	1.2954
11.475	0.2918	11.475	0.895351	11.4752	1.16295	11.4753	0.861451	11.4753	1.26655	11.475	1.52085	11.4753	1.4821	11.4753	1.28305
11.4833	0.2918	11.4833	0.893151	11.4835	1.1566	11.4837	0.855651	11.4837	1.2557	11.4833	1.5134	11.4837	1.474	11.4837	1.26935
11.4917	0.29115	11.4917	0.892001	11.4918	1.1518	11.492	0.850301	11.492	1.24385	11.4917	1.5082	11.492	1.47175	11.492	1.25885
11.5	0.2918	11.5	0.889451	11.5002	1.14795	11.5003	0.843151	11.5003	1.23495	11.5	1.50425	11.5003	1.46565	11.5003	1.2481
11.5083	0.29005	11.5083	0.887351	11.5085	1.14125	11.5087	0.839801	11.5087	1.22615	11.5083	1.4976	11.5087	1.46155	11.5087	1.23815
11.5167	0.28895	11.5167	0.884851	11.5168	1.1375	11.517	0.832851	11.517	1.2163	11.5167	1.4926	11.517	1.4575	11.517	1.2275
11.525	0.29025	11.525	0.883901	11.5252	1.1303	11.5253	0.831001	11.5253	1.20845	11.525	1.4848	11.5253	1.4511	11.5253	1.21865
11.5333	0.28715	11.5333	0.882501	11.5335	1.1264	11.5337	0.824251	11.5337	1.20155	11.5333	1.48355	11.5337	1.4482	11.5337	1.20895
11.5417	0.28675	11.5417	0.882101	11.5418	1.1234	11.542	0.822151	11.542	1.1946	11.5417	1.4777	11.542	1.4435	11.542	1.2008
11.55	0.2848	11.55	0.880051	11.5502	1.118	11.5503	0.817801	11.5503	1.1872	11.55	1.47315	11.5503	1.4397	11.5503	1.19165
11.5583	0.28585	11.5583	0.880351	11.5585	1.11525	11.5587	0.814001	11.5587	1.182	11.5583	1.46915	11.5587	1.43685	11.5587	1.18325
11.5667	0.28645	11.5667	0.879301	11.5668	1.1093	11.567	0.809851	11.567	1.177	11.5667	1.4652	11.567	1.4315	11.567	1.1755
11.575	0.28675	11.575	0.879251	11.5752	1.1077	11.5753	0.807751	11.5753	1.1722	11.575	1.4605	11.5753	1.42905	11.5753	1.16885
11.5833	0.2836	11.5833	0.876501	11.5835	1.104	11.5837	0.804751	11.5837	1.16675	11.5833	1.4586	11.5837	1.42705	11.5837	1.16135
11.5917	0.28565	11.5917	0.877051	11.5918	1.10145	11.592	0.800951	11.592	1.1615	11.5917	1.4552	11.592	1.42535	11.592	1.1537
11.6	0.28315	11.6	0.872901	11.6002	1.0984	11.6003	0.798451	11.6003	1.1566	11.6	1.4516	11.6003	1.4223	11.6003	1.1443
11.6083	0.28385	11.6083	0.874301	11.6085	1.09535	11.6087	0.796451	11.6087	1.1529	11.6083	1.4483	11.6087	1.4201	11.6087	1.1386
11.6167	0.28205	11.6167	0.873851	11.6168	1.09275	11.617	0.793101	11.617	1.15605	11.6167	1.44645	11.617	1.4162	11.617	1.13145
11.625	0.28365	11.625	0.872101	11.6252	1.09045	11.6253	0.790301	11.6253	1.1466	11.625	1.44295	11.6253	1.4161	11.6253	1.1233
11.6333	0.2825	11.6333	0.872551	11.6335	1.0873	11.6337	0.786901	11.6337	1.1436	11.6333	1.44035	11.6337	1.41185	11.6337	1.11585
11.6417	0.2821	11.6417	0.870401	11.6418	1.0865	11.642	0.785251	11.642	1.13785	11.6417	1.43815	11.642	1.41055	11.642	1.10975
11.65	0.281251	11.65	0.869101	11.6502	1.0842	11.6503	0.785051	11.6503	1.1363	11.65	1.43675	11.6503	1.4086	11.6503	1.10265
11.6583	0.283351	11.6583	0.869151	11.6585	1.0837	11.6587	0.7816	11.6587	1.1323	11.6583	1.43435	11.6587	1.4084	11.6587	1.0948
11.6667	0.282501	11.6667	0.868151	11.6668	1.08125	11.667	0.7802	11.667	1.13095	11.6667	1.43435	11.667	1.4057	11.667	1.0887
11.675	0.281351	11.675	0.866801	11.6752	1.0802	11.6753	0.77955	11.6753	1.1276	11.675	1.4332	11.6753	1.4045	11.6753	1.083
11.6833	0.281951	11.6833	0.867701	11.6835	1.07975	11.6837	0.7776	11.6837	1.1248	11.6833	1.43145	11.6837	1.4046	11.6837	1.0758
11.6917	0.282501	11.6917	0.867501	11.6918	1.0774	11.692	0.77545	11.692	1.1218	11.6917	1.429	11.692	1.40135	11.692	1.06955
11.7	0.281851	11.7	0.866851	11.7002	1.0738	11.7003	0.7735	11.7003	1.1191	11.7	1.4279	11.7003	1.4001	11.7003	1.063
11.7083	0.280151	11.7083	0.865201	11.7085	1.07555	11.7087	0.7719	11.7087	1.11485	11.7083	1.4279	11.7087	1.39915	11.7087	1.05885
11.7167	0.280451	11.7167	0.864051	11.7168	1.0743	11.717	0.7711	11.717	1.11405	11.7167	1.4281	11.717	1.3997	11.717	1.0517
11.725	0.278601	11.725	0.862651	11.7252	1.0757	11.7253	0.76855	11.7253	1.11165	11.725	1.42845	11.7253	1.39975	11.7253	1.047
11.7333	0.277951	11.7333	0.862251	11.7335	1.07485	11.7337	0.7679	11.7337	1.10795	11.7333	1.4287	11.7337	1.4003	11.7337	1.0413
11.7417	0.276751	11.7417	0.861801	11.7418	1.07645	11.742	0.76625	11.742	1.10585	11.7417	1.42995	11.742	1.3994	11.742	1.0352
11.75	0.277501	11.75	0.863451	11.7502	1.07545	11.7503	0.76425	11.7503	1.1027	11.75	1.4304	11.7503	1.40015	11.7503	1.02845
11.7583	0.276101	11.7583	0.864251	11.7585	1.07485	11.7587	0.7635	11.7587	1.09945	11.7583	1.42835	11.7587	1.39805	11.7587	1.02235
11.7667	0.277401	11.7667	0.867101	11.7668	1.0759	11.767	0.76165	11.767	1.0969	11.7667	1.43085	11.767	1.3998	11.767	1.01865
11.775	0.276001	11.775	0.866301	11.7752	1.07955	11.7753	0.76005	11.7753	1.0935	11.775	1.43425	11.7753	1.39975	11.7753	1.01225
11.7833	0.277951	11.7833	0.870051	11.7835	1.0771	11.7837	0.7576	11.7837	1.0905	11.7833	1.43435	11.7837	1.40025	11.7837	1.0056
11.7917	0.278401	11.7917	0.872601	11.7918	1.0787	11.792	0.75625	11.792	1.08805	11.7917	1.4359	11.792	1.40075	11.792	1.0017
11.8	0.277701	11.8	0.873901	11.8002	1.08355	11.8003	0.7549	11.8003	1.08525	11.8	1.4387	11.8003	1.4035	11.8003	0.9961
11.8083	0.279851	11.8083	0.874901	11.8085	1.0833	11.8087	0.7541	11.8087	1.0838	11.8083	1.44255	11.8087	1.403	11.8087	0.9922
11.8167	0.278451	11.8167	0.876801	11.8168	1.0881	11.817	0.7497	11.817	1.07985	11.8167	1.44445	11.817	1.40505	11.817	0.98705
11.825	0.278001	11.825	0.877901	11.8252	1.09055	11.8253	0.7486	11.8253	1.07725	11.825	1.4504	11.8253	1.4075	11.8253	0.9816
11.8333	0.278101	11.8333	0.881851	11.8335	1.0944	11.8337	0.74655	11.8337	1.07465	11.8333	1.4536	11.8337	1.4102	11.8337	0.97855
11.8417	0.276451	11.8417	0.881601	11.8418	1.0988	11.842	0.74515	11.842	1.0709	11.8417	1.45935	11.842	1.41255	11.842	0.97425
11.85	0.273301	11.85	0.881551	11.8502	1.10025	11.8503	0.74445	11.8503	1.06825	11.85	1.46335	11.8503	1.41535	11.8503	0.9693
11.8583	0.276451	11.8583	0.882951	11.8585	1.10525	11.8587	0.74445	11.8587	1.06435	11.8583	1.4681	11.8587	1.41745	11.8587	0.9643
11.8667	0.275801	11.8667	0.882051	11.8668	1.11195	11.867	0.74295	11.867	1.061	11.8667	1.4746	11.867	1.4234	11.867	0.9613
11.875	0.275351	11.875	0.879801	11.8752	1.1193	11.8753	0.74425	11.8753	1.0591	11.875	1.4814	11.8753	1.4277	11.8753	0.95695
11.8833	0.273851	11.8833	0.875551	11.8835	1.12475	11.8837	0.74375	11.8837	1.0543	11.8833	1.48795	11.8837	1.43315	11.8837	0.95435
11.8917	0.273951	11.8917	0.872051	11.8918	1.1347	11.892	0.74725	11.892	1.0531	11.8917	1.5005	11.892	1.44285	11.892	0.95245
11.9	0.273401	11.9	0.866051	11.9002	1.14165	11.9003	0.74595	11.9003	1.04885	11.9	1.5088	11.9003	1.4501	11.9003	0.94815
11.9083	0.276401	11.9083	0.862401	11.9085	1.14855	11.9087	0.74735	11.9087	1.047	11.9083	1.51595	11.9087	1.45605	11.9087	0.94545
11.9167	0.276601	11.9167	0.856451	11.9168	1.1599	11.917	0.75015	11.917	1.0446	11.9167	1.52775	11.917	1.46685	11.917	0.94145
11.925	0.275351	11.925	0.846701	11.9252	1.1717	11.9253	0.75255	11.9253	1.0425	11.925	1.5375	11.9253	1.4784	11.9253	0.94005
11.9333	0.275951	11.9333	0.838151	11.9335	1.1784	11.9337	0.75485	11.9337	1.03955	11.9333	1.54535	11.9337	1.48395	11.9337	0.93835
11.9417	0.275351	11.9417	0.828101	11.9418	1.19155	11.942	0.7615	11.942	1.039	11.9417	1.55735	11.942	1.49735	11.942	0.9355
11.95	0.274401	11.95	0.816801	11.9502	1.2032	11.9503	0.7673	11.9503	1.0349	11.95	1.5683	11.9503	1.50795	11.9503	0.9323
11.9583	0.274701	11.9583	0.805351	11.9585	1.21315	11.9587	0.7722	11.9587	1.03125	11.9583	1.5797	11.9587	1.51915	11.9587	0.92815
11.9667	0.276651	11.9667	0.796551	11.9668	1.2264	11.967	0.7802	11.967	1.03095	11.9667	1.5894	11.967	1.52995	11.967	0.92735
11.975	0.278701	11.975	0.787151	11.9752	1.23785	11.9753	0.78795	11.9753	1.02945	11.975	1.60005	11.9753	1.543	11.9753	0.92475
11.9833	0.277201	11.9833	0.775551	11.9835	1.25045	11.9837	0.79825	11.9837	1.0258	11.9833	1.6134	11.9837	1.55575	11.9837	0.9216
11.9917	0.277351	11.9917	0.763801	11.9918	1.26075	11.992	0.80665	11.992	1.0242	11.9917	1.6234	11.992	1.556	11.992	0.9191
12	0.278101	12	0.752851	12.0002	1.27245	12.0003	0.8164	12.0003	1.024	12	1.63215	12.0003	1.5453	12.0003	0.91695
12.0083	0.277951	12.0083	0.743401	12.0085	1.28245	12.0087	0.82645	12.0087	1.0233	12.0083	1.6419	12.0087	1.52495	12.0087	0.9159
12.0167	0.276251	12.0167	0.733501	12.0168	1.29445	12.017	0.83735	12.017	1.02245	12.0167	1.65085	12.017	1.62185	12.017	0.9171
12.025	0.277601	12.025	0.723951	12.0252	1.30555	12.0253	0.84795	12.0253	1.02015	12.025	1.66025	12.0253	1.58795	12.0253	0.91455
12.0333	0.277801	12.0333	0.714401	12.0335	1.3138	12.0337	0.8583	12.0337	1.0185	12.0333	1.66855	12.0337	1.6069	12.0337	0.91445
12.0417	0.278051	12.0417	0.707451	12.0418	1.3241	12.042	0.8686	12.042	1.01555	12.0417	1.67685	12.042	1.62535	12.042	0.90985
12.05	0.280601	12.05	0.698401	12.0502	1.3336	12.0503	0.8808	12.0503	1.01525	12.05	1.6853	12.0503	1.64085	12.0503	0.90985
12.0583	0.281101	12.0583	0.688551	12.0585	1.34425	12.0587	0.89105	12.0587	1.01305	12.0583	1.69385	12.0587	1.6561	12.0587	0.9062
12.0667	0.281951	12.0667	0.683151	12.0668	1.3506	12.067	0.9048	12.067	1.0098	12.0667	1.7007	12.067	1.66235	12.067	0.90515
12.075	0.283801	12.075	0.678701	12.0752	1.3593	12.0753	0.91565	12.0753	1.0092	12.075	1.707	12.0753	1.6432	12.0753	0.90565
12.0833	0.282501	12.0833	0.671151	12.0835	1.36775	12.0837	0.9272	12.0837	1.00885	12.0833	1.7133	12.0837	1.6355	12.0837	0.9056
12.0917	0.286301	12.0917	0.669651	12.0918	1.37575	12.092	0.93655	12.092	1.00865	12.0917	1.71985	12.092	1.73585	12.092	0.905
12.1	0.288901	12.1	0.667251	12.1002	1.3826	12.1003	0.9467	12.1003	1.0061	12.1	1.7243	12.1003	1.7068	12.1003	0.9023
12.1083	0.293551	12.1083	0.666551	12.1085	1.3885	12.1087	0.96005	12.1087	1.0062	12.1083	1.7289	12.1087	1.68235	12.1087	0.90225
12.1167	0.296301	12.1167	0.665501	12.1168	1.39635	12.117	0.96735	12.117	1.00225	12.1167	1.7368	12.117	1.69755	12.117	0.89865
12.125	0.304801	12.125	0.670501	12.1252	1.4016	12.1253	0.9781	12.1253	1.00365	12.125	1.7403	12.1253	1.7091	12.1253	0.8997
12.1333	0.314101	12.1333	0.677601	12.1335	1.40705	12.1337	0.9896	12.1337	1.00345	12.1333	1.743	12.1337	1.71875	12.1337	0.8965
12.1417	0.322051	12.1417	0.690251	12.1418	1.41205	12.142	0.99615	12.142	0.99995	12.1417	1.7477	12.142	1.72445	12.142	0.8958
12.15	0.339701	12.15	0.708651	12.1502	1.41795	12.1503	1.0053	12.1503	1.0003	12.15	1.75195	12.1503	1.73155	12.1503	0.8953
12.1583	0.359001	12.1583	0.730801	12.1585	1.4224	12.1587	1.01315	12.1587	1.00135	12.1583	1.75555	12.1587	1.73565	12.1587	0.89395
12.1667	0.382801	12.1667	0.760351	12.1668	1.426	12.167	1.0189	12.167	1.00115	12.1667	1.75755	12.167	1.7397	12.167	0.8943
12.175	0.411151	12.175	0.795401	12.1752	1.4326	12.1753	1.0242	12.1753	1.00155	12.175	1.7633	12.1753	1.7446	12.1753	0.8947
12.1833	0.447851	12.1833	0.837451	12.1835	1.43615	12.1837	1.03515	12.1837	1.00135	12.1833	1.76845	12.1837	1.7503	12.1837	0.8935
12.1917	0.490801	12.1917	0.887951	12.1918	1.439	12.192	1.0374	12.192	0.99995	12.1917	1.7696	12.192	1.7523	12.192	0.8918
12.2	0.542001	12.2	0.943801	12.2002	1.44445	12.2003	1.04535	12.2003	1.00195	12.2	1.7735	12.2003	1.75875	12.2003	0.8928
12.2083	0.598901	12.2083	1.00915	12.2085	1.45095	12.2087	1.04935	12.2087	1.0027	12.2083	1.77985	12.2087	1.7641	12.2087	0.8928
12.2167	0.663251	12.2167	1.0773	12.2168	1.4523	12.217	1.0549	12.217	1.00195	12.2167	1.7818	12.217	1.76645	12.217	0.8915
12.225	0.733551	12.225	1.15185	12.2252	1.45275	12.2253	1.06095	12.2253	1.00065	12.225	1.7832	12.2253	1.77055	12.2253	0.8885
12.2333	0.807601	12.2333	1.2276	12.2335	1.46105	12.2337	1.0637	12.2337	1.00015	12.2333	1.7891	12.2337	1.7748	12.2337	0.88945
12.2417	0.890901	12.2417	1.3045	12.2418	1.4617	12.242	1.06815	12.242	1.0015	12.2417	1.7897	12.242	1.7761	12.242	0.8896
12.25	0.97075	12.25	1.3797	12.2502	1.46635	12.2503	1.0733	12.2503	1.00205	12.25	1.79235	12.2503	1.78055	12.2503	0.8897
12.2583	1.05	12.2583	1.45005	12.2585	1.4655	12.2587	1.0785	12.2587	1.00395	12.2583	1.7939	12.2587	1.78165	12.2587	0.89125
12.2667	1.12865	12.2667	1.5149	12.2668	1.4679	12.267	1.0806	12.267	1.00535	12.2667	1.79355	12.267	1.78155	12.267	0.89145
12.275	1.20175	12.275	1.575	12.2752	1.4701	12.2753	1.08455	12.2753	1.00825	12.275	1.7951	12.2753	1.7859	12.2753	0.894
12.2833	1.2684	12.2833	1.6246	12.2835	1.4684	12.2837	1.08675	12.2837	1.00985	12.2833	1.792	12.2837	1.78345	12.2837	0.8946
12.2917	1.32505	12.2917	1.66045	12.2918	1.46925	12.292	1.08895	12.292	1.0133	12.2917	1.7919	12.292	1.7833	12.292	0.89815
12.3	1.3715	12.3	1.6849	12.3002	1.46885	12.3003	1.0926	12.3003	1.01845	12.3	1.79	12.3003	1.78195	12.3003	0.9012
12.3083	1.40165	12.3083	1.6938	12.3085	1.46705	12.3087	1.09315	12.3087	1.0241	12.3083	1.7882	12.3087	1.78135	12.3087	0.905
12.3167	1.42205	12.3167	1.69435	12.3168	1.46545	12.317	1.09395	12.317	1.03115	12.3167	1.78335	12.317	1.77825	12.317	0.90655
12.325	1.4254	12.325	1.67925	12.3252	1.46055	12.3253	1.09575	12.3253	1.03785	12.325	1.7777	12.3253	1.7773	12.3253	0.9124
12.3333	1.4147	12.3333	1.64995	12.3335	1.4546	12.3337	1.09515	12.3337	1.04535	12.3333	1.77195	12.3337	1.7603	12.3337	0.9165
12.3417	1.39005	12.3417	1.61185	12.3418	1.44755	12.342	1.0928	12.342	1.0529	12.3417	1.763	12.342	1.73315	12.342	0.9211
12.35	1.35485	12.35	1.5637	12.3502	1.43955	12.3503	1.0927	12.3503	1.0612	12.35	1.75445	12.3503	1.66405	12.3503	0.92745
12.3583	1.3096	12.3583	1.5059	12.3585	1.4303	12.3587	1.08765	12.3587	1.07105	12.3583	1.745	12.3587	1.9078	12.3587	0.93425
12.3667	1.2572	12.3667	1.44365	12.3668	1.4214	12.367	1.08405	12.367	1.0826	12.3667	1.7341	12.367	1.8281	12.367	0.9409
12.375	1.1955	12.375	1.3767	12.3752	1.40775	12.3753	1.0777	12.3753	1.0942	12.375	1.7201	12.3753	1.66385	12.3753	0.95095
12.3833	1.1292	12.3833	1.3051	12.3835	1.39455	12.3837	1.07365	12.3837	1.1053	12.3833	1.70545	12.3837	1.68275	12.3837	0.95855
12.3917	1.0618	12.3917	1.23425	12.3918	1.38145	12.392	1.06505	12.392	1.11385	12.3917	1.6903	12.392	1.6673	12.392	0.9659
12.4	0.9919	12.4	1.16485	12.4002	1.36635	12.4003	1.0565	12.4003	1.1237	12.4	1.6746	12.4003	1.6596	12.4003	0.9733
12.4083	0.9207	12.4083	1.094	12.4085	1.34915	12.4087	1.04295	12.4087	1.1334	12.4083	1.6572	12.4087	1.5953	12.4087	0.98395
12.4167	0.8556	12.4167	1.0286	12.4168	1.3277	12.417	1.0322	12.417	1.1406	12.4167	1.63585	12.417	1.55005	12.417	0.9911
12.425	0.79265	12.425	0.96525	12.4252	1.31015	12.4253	1.01965	12.4253	1.1482	12.425	1.61965	12.4253	1.68775	12.4253	1.00035
12.4333	0.73595	12.4333	0.9079	12.4335	1.29245	12.4337	1.0055	12.4337	1.15385	12.4333	1.6005	12.4337	1.56205	12.4337	1.00695
12.4417	0.6815	12.4417	0.85615	12.4418	1.2714	12.442	0.98965	12.442	1.15845	12.4417	1.5786	12.442	1.56815	12.442	1.01325
12.45	0.6309	12.45	0.8072	12.4502	1.24785	12.4503	0.97215	12.4503	1.1629	12.45	1.55655	12.4503	1.5257	12.4503	1.01995
12.4583	0.58885	12.4583	0.76395	12.4585	1.2273	12.4587	0.95635	12.4587	1.1656	12.4583	1.5362	12.4587	1.5139	12.4587	1.0263
12.4667	0.5499	12.4667	0.7233	12.4668	1.20565	12.467	0.93785	12.467	1.1654	12.4667	1.5156	12.467	1.49985	12.467	1.02865
12.475	0.5146	12.475	0.6907	12.4752	1.18425	12.4753	0.91885	12.4753	1.16585	12.475	1.49285	12.4753	1.4807	12.4753	1.03295
12.4833	0.48605	12.4833	0.66225	12.4835	1.16495	12.4837	0.89875	12.4837	1.16425	12.4833	1.47525	12.4837	1.4639	12.4837	1.0339
12.4917	0.4585	12.4917	0.6362	12.4918	1.14635	12.492	0.8794	12.492	1.1647	12.4917	1.45665	12.492	1.4474	12.492	1.0358
12.5	0.4373	12.5	0.6112	12.5002	1.12455	12.5003	0.86165	12.5003	1.16305	12.5	1.4372	12.5003	1.4309	12.5003	1.03655
12.5083	0.41655	12.5083	0.59395	12.5085	1.10755	12.5087	0.8421	12.5087	1.16255	12.5083	1.4158	12.5087	1.41555	12.5087	1.03485
12.5167	0.4002	12.5167	0.577	12.5168	1.0889	12.517	0.82125	12.517	1.1587	12.5167	1.40085	12.517	1.40115	12.517	1.03475
12.525	0.3861	12.525	0.5609	12.5252	1.07275	12.5253	0.804	12.5253	1.15495	12.525	1.38375	12.5253	1.39015	12.5253	1.03135
12.5333	0.3754	12.5333	0.5499	12.5335	1.05245	12.5337	0.78385	12.5337	1.1505	12.5333	1.36585	12.5337	1.3752	12.5337	1.0265
12.5417	0.364	12.5417	0.5398	12.5418	1.0397	12.542	0.7685	12.542	1.14585	12.5417	1.35165	12.542	1.3652	12.542	1.02395
12.55	0.35695	12.55	0.5306	12.5502	1.02415	12.5503	0.75165	12.5503	1.14185	12.55	1.3397	12.5503	1.3561	12.5503	1.01995
12.5583	0.34835	12.5583	0.5233	12.5585	1.01075	12.5587	0.738	12.5587	1.1363	12.5583	1.32505	12.5587	1.34445	12.5587	1.0152
12.5667	0.3434	12.5667	0.5171	12.5668	0.99695	12.567	0.7221	12.567	1.1317	12.5667	1.3122	12.567	1.3372	12.567	1.01045
12.575	0.338	12.575	0.5116	12.5752	0.98585	12.5753	0.7076	12.5753	1.126	12.575	1.30185	12.5753	1.33115	12.5753	1.0053
12.5833	0.33255	12.5833	0.50645	12.5835	0.97535	12.5837	0.69515	12.5837	1.11995	12.5833	1.29205	12.5837	1.32435	12.5837	1.00145
12.5917	0.32775	12.5917	0.5011	12.5918	0.9639	12.592	0.6819	12.592	1.11445	12.5917	1.28145	12.592	1.3171	12.592	0.99635
12.6	0.3236	12.6	0.49915	12.6002	0.954	12.6003	0.6702	12.6003	1.10825	12.6	1.27255	12.6003	1.3121	12.6003	0.9892
12.6083	0.32215	12.6083	0.49585	12.6085	0.948	12.6087	0.6616	12.6087	1.10255	12.6083	1.26485	12.6087	1.3071	12.6087	0.9853
12.6167	0.316	12.6167	0.48945	12.6168	0.93685	12.617	0.6485	12.617	1.09835	12.6167	1.25425	12.617	1.30095	12.617	0.98105
12.625	0.3142	12.625	0.4865	12.6252	0.9334	12.6253	0.6424	12.6253	1.094	12.625	1.25085	12.6253	1.29875	12.6253	0.97555
12.6333	0.3105	12.6333	0.4838	12.6335	0.92225	12.6337	0.63455	12.6337	1.0887	12.6333	1.2406	12.6337	1.2916	12.6337	0.9727
12.6417	0.31085	12.6417	0.4832	12.6418	0.9183	12.642	0.627	12.642	1.0839	12.6417	1.23555	12.642	1.2879	12.642	0.9693
12.65	0.30755	12.65	0.47985	12.6502	0.9143	12.6503	0.619	12.6503	1.08165	12.65	1.2322	12.6503	1.28645	12.6503	0.96865
12.6583	0.30565	12.6583	0.4768	12.6585	0.97895	12.6587	0.6121	12.6587	1.07945	12.6583	1.2968	12.6587	1.35495	12.6587	0.9649
12.6667	0.30415	12.6667	0.47435	12.6668	0.8624	12.667	0.6073	12.667	1.07115	12.6667	1.17965	12.667	1.23605	12.667	0.9646
12.675	0.30175	12.675	0.47085	12.6752	0.9909	12.6753	0.6019	12.6753	1.067	12.675	1.30765	12.6753	1.3665	12.6753	0.9621
12.6833	0.3016	12.6833	0.4705	12.6835	0.8952	12.6837	0.59815	12.6837	1.06505	12.6833	1.21235	12.6837	1.2722	12.6837	0.96175
12.6917	0.30115	12.6917	0.46875	12.6918	0.8742	12.692	0.5918	12.692	1.0646	12.6917	1.19125	12.692	1.25235	12.692	0.9605
12.7	0.2986	12.7	0.46695	12.7002	0.8845	12.7003	0.58885	12.7003	1.06275	12.7	1.20095	12.7003	1.2621	12.7003	0.9591
12.7083	0.29845	12.7083	0.4662	12.7085	0.8894	12.7087	0.58625	12.7087	1.0608	12.7083	1.20495	12.7087	1.2665	12.7087	0.96405
12.7167	0.2949	12.7167	0.46435	12.7168	0.88195	12.717	0.5826	12.717	1.06005	12.7167	1.1962	12.717	1.25785	12.717	0.96545
12.725	0.2915	12.725	0.46115	12.7252	0.87645	12.7253	0.58075	12.7253	1.06115	12.725	1.1907	12.7253	1.2543	12.7253	0.96935
12.7333	0.2915	12.7333	0.4595	12.7335	0.87855	12.7337	0.57825	12.7337	1.05825	12.7333	1.19195	12.7337	1.2556	12.7337	0.97145
12.7417	0.29075	12.7417	0.4567	12.7418	0.87545	12.742	0.578	12.742	1.06075	12.7417	1.19025	12.742	1.25375	12.742	0.9755
12.75	0.28935	12.75	0.45795	12.7502	0.87355	12.7503	0.5732	12.7503	1.062	12.75	1.1841	12.7503	1.25055	12.7503	0.9786
12.7583	0.29035	12.7583	0.45705	12.7585	0.8725	12.7587	0.5743	12.7587	1.0659	12.7583	1.1844	12.7587	1.25095	12.7587	0.98435
12.7667	0.2873	12.7667	0.4562	12.7668	0.8694	12.767	0.57135	12.767	1.0676	12.7667	1.1811	12.767	1.24755	12.767	0.9909
12.775	0.2899	12.775	0.4574	12.7752	0.86885	12.7753	0.572	12.7753	1.072	12.775	1.18235	12.7753	1.2477	12.7753	0.99965
12.7833	0.2888	12.7833	0.4551	12.7835	0.8679	12.7837	0.57105	12.7837	1.0757	12.7833	1.1816	12.7837	1.2485	12.7837	1.0045
12.7917	0.291	12.7917	0.45715	12.7918	0.86855	12.792	0.57195	12.792	1.07915	12.7917	1.1814	12.792	1.2466	12.792	1.01015
12.8	0.29285	12.8	0.45815	12.8002	0.86855	12.8003	0.57215	12.8003	1.0844	12.8	1.1807	12.8003	1.2504	12.8003	1.01935
12.8083	0.2925	12.8083	0.4571	12.8085	0.8705	12.8087	0.57195	12.8087	1.0911	12.8083	1.181	12.8087	1.25175	12.8087	1.02745
12.8167	0.295	12.8167	0.45865	12.8168	0.87055	12.817	0.5724	12.817	1.0955	12.8167	1.18165	12.817	1.25435	12.817	1.0355
12.825	0.29665	12.825	0.46075	12.8252	0.8718	12.8253	0.57365	12.8253	1.10315	12.825	1.18135	12.8253	1.25595	12.8253	1.04275
12.8333	0.29655	12.8333	0.45985	12.8335	0.87155	12.8337	0.5736	12.8337	1.11135	12.8333	1.18005	12.8337	1.25985	12.8337	1.05235
12.8417	0.2978	12.8417	0.46275	12.8418	0.8748	12.842	0.57505	12.842	1.12115	12.8417	1.1829	12.842	1.26365	12.842	1.06205
12.85	0.3008	12.85	0.4623	12.8502	0.8749	12.8503	0.57675	12.8503	1.1272	12.85	1.1827	12.8503	1.2672	12.8503	1.0683
12.8583	0.3018	12.8583	0.4646	12.8585	0.87715	12.8587	0.57545	12.8587	1.13825	12.8583	1.1838	12.8587	1.2711	12.8587	1.0764
12.8667	0.3014	12.8667	0.4631	12.8668	0.87865	12.867	0.57715	12.867	1.1471	12.8667	1.1862	12.867	1.27915	12.867	1.08585
12.875	0.304	12.875	0.4637	12.8752	0.8815	12.8753	0.57905	12.8753	1.15765	12.875	1.18725	12.8753	1.28545	12.8753	1.0937
12.8833	0.3	12.8833	0.46075	12.8835	0.8828	12.8837	0.5804	12.8837	1.16745	12.8833	1.18745	12.8837	1.2913	12.8837	1.10005
12.8917	0.30145	12.8917	0.4602	12.8918	0.88725	12.892	0.58355	12.892	1.17605	12.8917	1.19105	12.892	1.2991	12.892	1.10725
12.9	0.3022	12.9	0.45955	12.9002	0.88935	12.9003	0.58435	12.9003	1.1882	12.9	1.19345	12.9003	1.3065	12.9003	1.11305
12.9083	0.30095	12.9083	0.45925	12.9085	0.8948	12.9087	0.5883	12.9087	1.19715	12.9083	1.1951	12.9087	1.31625	12.9087	1.1203
12.9167	0.29925	12.9167	0.4563	12.9168	0.89565	12.917	0.58875	12.917	1.20725	12.9167	1.19645	12.917	1.324	12.917	1.12285
12.925	0.2963	12.925	0.45475	12.9252	0.9001	12.9253	0.5908	12.9253	1.213	12.925	1.19995	12.9253	1.33275	12.9253	1.1286
12.9333	0.2983	12.9333	0.45245	12.9335	0.903	12.9337	0.5925	12.9337	1.22515	12.9333	1.2022	12.9337	1.3432	12.9337	1.13325
12.9417	0.29565	12.9417	0.45065	12.9418	0.9091	12.942	0.59415	12.942	1.2316	12.9417	1.20555	12.942	1.3553	12.942	1.13675
12.95	0.2935	12.95	0.44805	12.9502	0.91035	12.9503	0.5963	12.9503	1.2398	12.95	1.20825	12.9503	1.36245	12.9503	1.13965
12.9583	0.2919	12.9583	0.44615	12.9585	0.9136	12.9587	0.59785	12.9587	1.2459	12.9583	1.20875	12.9587	1.37145	12.9587	1.14355
12.9667	0.28945	12.9667	0.4423	12.9668	0.9191	12.967	0.59965	12.967	1.2514	12.9667	1.2134	12.967	1.38085	12.967	1.14565
12.975	0.28835	12.975	0.4393	12.9752	0.9201	12.9753	0.60255	12.9753	1.25805	12.975	1.2161	12.9753	1.3894	12.9753	1.14785
12.9833	0.28615	12.9833	0.43975	12.9835	0.9244	12.9837	0.60245	12.9837	1.26385	12.9833	1.2184	12.9837	1.3936	12.9837	1.1499
12.9917	0.284	12.9917	0.4377	12.9918	0.9292	12.992	0.60305	12.992	1.2686	12.9917	1.22195	12.992	1.40235	12.992	1.15185
13	0.2821	13	0.43635	13.0002	0.93155	13.0003	0.6036	13.0003	1.27365	13	1.225	13.0003	1.4075	13.0003	1.1537
13.0083	0.28255	13.0083	0.4356	13.0085	0.93455	13.0087	0.6048	13.0087	1.27565	13.0083	1.22725	13.0087	1.41405	13.0087	1.15335
13.0167	0.28145	13.0167	0.43345	13.0168	0.9367	13.017	0.60365	13.017	1.27755	13.0167	1.22895	13.017	1.4169	13.017	1.15465
13.025	0.2796	13.025	0.4318	13.0252	0.93735	13.0253	0.60365	13.0253	1.2808	13.025	1.22955	13.0253	1.42095	13.0253	1.1573
13.0333	0.27885	13.0333	0.4311	13.0335	0.9425	13.0337	0.60305	13.0337	1.2816	13.0333	1.23255	13.0337	1.42355	13.0337	1.15695
13.0417	0.27635	13.0417	0.4294	13.0418	0.94225	13.042	0.59935	13.042	1.28505	13.0417	1.232	13.042	1.4245	13.042	1.15955
13.05	0.27625	13.05	0.43055	13.0502	0.94575	13.0503	0.59875	13.0503	1.28495	13.05	1.2333	13.0503	1.42505	13.0503	1.1608
13.0583	0.27775	13.0583	0.43235	13.0585	0.94365	13.0587	0.5964	13.0587	1.28735	13.0583	1.231	13.0587	1.42205	13.0587	1.1603
13.0667	0.27615	13.0667	0.43245	13.0668	0.9441	13.067	0.59195	13.067	1.28885	13.0667	1.231	13.067	1.4207	13.067	1.1612
13.075	0.2776	13.075	0.43435	13.0752	0.94365	13.0753	0.5876	13.0753	1.28705	13.075	1.23065	13.0753	1.4164	13.0753	1.16075
13.0833	0.27945	13.0833	0.4365	13.0835	0.94185	13.0837	0.58525	13.0837	1.28685	13.0833	1.22865	13.0837	1.41225	13.0837	1.1612
13.0917	0.27945	13.0917	0.4379	13.0918	0.93965	13.092	0.57935	13.092	1.2851	13.0917	1.22645	13.092	1.4042	13.092	1.1597
13.1	0.2814	13.1	0.4381	13.1002	0.93705	13.1003	0.57255	13.1003	1.28345	13.1	1.2219	13.1003	1.3958	13.1003	1.1593
13.1083	0.2821	13.1083	0.4407	13.1085	0.9335	13.1087	0.57	13.1087	1.2811	13.1083	1.21975	13.1087	1.38815	13.1087	1.1561
13.1167	0.28195	13.1167	0.4415	13.1168	0.93045	13.117	0.5638	13.117	1.27815	13.1167	1.21755	13.117	1.3784	13.117	1.15535
13.125	0.28295	13.125	0.4446	13.1252	0.9261	13.1253	0.55615	13.1253	1.2725	13.125	1.2119	13.1253	1.36735	13.1253	1.15365
13.1333	0.2775	13.1333	0.446	13.1335	0.9199	13.1337	0.5498	13.1337	1.2678	13.1333	1.20635	13.1337	1.354	13.1337	1.14935
13.1417	0.22445	13.1417	0.44895	13.1418	0.9126	13.142	0.54535	13.142	1.2598	13.1417	1.19915	13.142	1.3395	13.142	1.14475
13.15	0.15155	13.15	0.4509	13.1502	0.9083	13.1503	0.53915	13.1503	1.2537	13.15	1.1938	13.1503	1.3267	13.1503	1.14235
13.1583	0.2941	13.1583	0.45005	13.1585	0.9005	13.1587	0.53	13.1587	1.24345	13.1583	1.18625	13.1587	1.3112	13.1587	1.134
13.1667	0.228	13.1667	0.45215	13.1668	0.89165	13.167	0.52475	13.167	1.23455	13.1667	1.17885	13.167	1.2977	13.167	1.12925
13.175	0.25825	13.175	0.45485	13.1752	0.8836	13.1753	0.5183	13.1753	1.22845	13.175	1.17195	13.1753	1.2831	13.1753	1.13685
13.1833	0.2755	13.1833	0.45475	13.1835	0.87425	13.1837	0.5085	13.1837	1.21155	13.1833	1.16375	13.1837	1.2684	13.1837	1.1114
13.1917	0.28405	13.1917	0.4535	13.1918	0.8647	13.192	0.50365	13.192	1.20215	13.1917	1.15515	13.192	1.2542	13.192	1.1044
13.2	0.2874	13.2	0.4547	13.2002	0.85655	13.2003	0.49965	13.2003	1.1899	13.2	1.1459	13.2003	1.2389	13.2003	1.09655
13.2083	0.2853	13.2083	0.454	13.2085	0.8459	13.2087	0.4917	13.2087	1.17725	13.2083	1.13845	13.2087	1.2228	13.2087	1.088
13.2167	0.2837	13.2167	0.4516	13.2168	0.83875	13.217	0.48485	13.217	1.16745	13.2167	1.13025	13.217	1.21265	13.217	1.0806
13.225	0.28455	13.225	0.4506	13.2252	0.82935	13.2253	0.48	13.2253	1.15565	13.225	1.1208	13.2253	1.19805	13.2253	1.0695
13.2333	0.28405	13.2333	0.4487	13.2335	0.82145	13.2337	0.4745	13.2337	1.1436	13.2333	1.11385	13.2337	1.1857	13.2337	1.0594
13.2417	0.2809	13.2417	0.4463	13.2418	0.8147	13.242	0.4682	13.242	1.1349	13.2417	1.1064	13.242	1.1746	13.242	1.051
13.25	0.28125	13.25	0.4451	13.2502	0.80705	13.2503	0.46185	13.2503	1.1243	13.25	1.0981	13.2503	1.16375	13.2503	1.03935
13.2583	0.2776	13.2583	0.43975	13.2585	0.79715	13.2587	0.4582	13.2587	1.11495	13.2583	1.08725	13.2587	1.1511	13.2587	1.03115
13.2667	0.2788	13.2667	0.4409	13.2668	0.78985	13.267	0.4529	13.267	1.1045	13.2667	1.083	13.267	1.14385	13.267	1.0221
13.275	0.2755	13.275	0.4382	13.2752	0.7833	13.2753	0.45125	13.2753	1.09755	13.275	1.07605	13.2753	1.1348	13.2753	1.01445
13.2833	0.275	13.2833	0.4358	13.2835	0.77575	13.2837	0.4451	13.2837	1.0889	13.2833	1.06865	13.2837	1.1254	13.2837	1.00535
13.2917	0.2754	13.2917	0.4333	13.2918	0.772	13.292	0.4433	13.292	1.08315	13.2917	1.06385	13.292	1.11845	13.292	0.9999
13.3	0.27305	13.3	0.4295	13.3002	0.76435	13.3003	0.44085	13.3003	1.0768	13.3	1.0586	13.3003	1.11035	13.3003	0.99395
13.3083	0.2703	13.3083	0.42765	13.3085	0.7603	13.3087	0.4361	13.3087	1.07525	13.3083	1.05305	13.3087	1.10295	13.3087	0.99265
13.3167	0.269	13.3167	0.42695	13.3168	0.75015	13.317	0.43395	13.317	1.07375	13.3167	1.0453	13.317	1.09345	13.317	0.99075
13.325	0.2686	13.325	0.42305	13.3252	0.74825	13.3253	0.4282	13.3253	1.07165	13.325	1.0425	13.3253	1.08935	13.3253	0.9894
13.3333	0.26665	13.3333	0.4207	13.3335	0.7398	13.3337	0.42855	13.3337	1.0709	13.3333	1.03535	13.3337	1.0812	13.3337	0.9904
13.3417	0.2656	13.3417	0.41985	13.3418	0.7378	13.342	0.42505	13.342	1.07075	13.3417	1.03345	13.342	1.0782	13.342	0.9897
13.35	0.26535	13.35	0.4169	13.3502	0.73185	13.3503	0.42295	13.3503	1.06955	13.35	1.02875	13.3503	1.071	13.3503	0.98995
13.3583	0.2634	13.3583	0.41525	13.3585	0.7285	13.3587	0.42155	13.3587	1.0713	13.3583	1.0262	13.3587	1.06715	13.3587	0.9909
13.3667	0.26185	13.3667	0.41395	13.3668	0.72595	13.367	0.41775	13.367	1.0736	13.3667	1.02055	13.367	1.06285	13.367	0.9928
13.375	0.2596	13.375	0.41	13.3752	0.7213	13.3753	0.41515	13.3753	1.07735	13.375	1.019	13.3753	1.0597	13.3753	0.99635
13.3833	0.2576	13.3833	0.40755	13.3835	0.71915	13.3837	0.41555	13.3837	1.0793	13.3833	1.01605	13.3837	1.0553	13.3837	0.9975
13.3917	0.2573	13.3917	0.4067	13.3918	0.7162	13.392	0.41295	13.392	1.0839	13.3917	1.015	13.392	1.0511	13.392	1.00065
13.4	0.25755	13.4	0.4051	13.4002	0.712	13.4003	0.41325	13.4003	1.0874	13.4	1.01075	13.4003	1.04745	13.4003	1.00305
13.4083	0.2571	13.4083	0.4036	13.4085	0.7078	13.4087	0.41215	13.4087	1.0919	13.4083	1.0091	13.4087	1.0438	13.4087	1.0051
13.4167	0.2561	13.4167	0.403	13.4168	0.70685	13.417	0.40865	13.417	1.0964	13.4167	1.0052	13.417	1.04025	13.417	1.0075
13.425	0.2526	13.425	0.399	13.4252	0.70475	13.4253	0.4076	13.4253	1.1003	13.425	1.00455	13.4253	1.0395	13.4253	1.00755
13.4333	0.252	13.4333	0.3988	13.4335	0.70305	13.4337	0.4056	13.4337	1.108	13.4333	1.0022	13.4337	1.0378	13.4337	1.0088
13.4417	0.25035	13.4417	0.3979	13.4418	0.6999	13.442	0.40255	13.442	1.11085	13.4417	0.99985	13.442	1.03345	13.442	1.0103
13.45	0.24995	13.45	0.39395	13.4502	0.6995	13.4503	0.4021	13.4503	1.11175	13.45	0.99945	13.4503	1.03375	13.4503	1.0082
13.4583	0.2493	13.4583	0.39435	13.4585	0.69625	13.4587	0.399	13.4587	1.1163	13.4583	0.99495	13.4587	1.0317	13.4587	1.00855
13.4667	0.24915	13.4667	0.3921	13.4668	0.6967	13.467	0.40005	13.467	1.12085	13.4667	0.99545	13.467	1.0294	13.467	1.0098
13.475	0.2482	13.475	0.3932	13.4752	0.6956	13.4753	0.39685	13.4753	1.12125	13.475	0.99255	13.4753	1.0289	13.4753	1.0088
13.4833	0.24785	13.4833	0.3907	13.4835	0.6947	13.4837	0.39555	13.4837	1.12285	13.4833	0.99325	13.4837	1.02865	13.4837	1.00735
13.4917	0.2466	13.4917	0.39055	13.4918	0.6917	13.492	0.3942	13.492	1.12655	13.4917	0.99135	13.492	1.02535	13.492	1.00955
13.5	0.24765	13.5	0.3891	13.5002	0.69155	13.5003	0.3919	13.5003	1.13025	13.5	0.9889	13.5003	1.02445	13.5003	1.01195
13.5083	0.2474	13.5083	0.38805	13.5085	0.6926	13.5087	0.39205	13.5087	1.1345	13.5083	0.99125	13.5087	1.02655	13.5087	1.0163
13.5167	0.2477	13.5167	0.38945	13.5168	0.7132	13.517	0.39015	13.517	1.13995	13.5167	1.0097	13.517	1.04495	13.517	1.02105
13.525	0.24445	13.525	0.38575	13.5252	0.71365	13.5253	0.38965	13.5253	1.14455	13.525	1.01155	13.5253	1.0458	13.5253	1.03005
13.5333	0.2441	13.5333	0.3852	13.5335	0.6626	13.5337	0.3871	13.5337	1.14985	13.5333	0.9613	13.5337	0.996	13.5337	1.0372
13.5417	0.24485	13.5417	0.38535	13.5418	0.6984	13.542	0.3855	13.542	1.1584	13.5417	0.997	13.542	1.031	13.542	1.0494
13.55	0.24335	13.55	0.38605	13.5502	0.7116	13.5503	0.3858	13.5503	1.1693	13.55	1.0082	13.5503	1.04245	13.5503	1.06395
13.5583	0.24235	13.5583	0.3851	13.5585	0.70225	13.5587	0.3866	13.5587	1.1828	13.5583	1.00075	13.5587	1.034	13.5587	1.07745
13.5667	0.24145	13.5667	0.38615	13.5668	0.69055	13.567	0.38405	13.567	1.1996	13.5667	0.98915	13.567	1.02145	13.567	1.09395
13.575	0.24265	13.575	0.3861	13.5752	0.6857	13.5753	0.3844	13.5753	1.217	13.575	0.98125	13.5753	1.01645	13.5753	1.11195
13.5833	0.24195	13.5833	0.38415	13.5835	0.68155	13.5837	0.38215	13.5837	1.23875	13.5833	0.98005	13.5837	1.01415	13.5837	1.1323
13.5917	0.2424	13.5917	0.3857	13.5918	0.68545	13.592	0.3844	13.592	1.26185	13.5917	0.9823	13.592	1.0152	13.592	1.1522
13.6	0.24115	13.6	0.3838	13.6002	0.6847	13.6003	0.3814	13.6003	1.2904	13.6	0.98355	13.6003	1.0147	13.6003	1.17245
13.6083	0.24135	13.6083	0.38555	13.6085	0.6869	13.6087	0.38375	13.6087	1.322	13.6083	0.98505	13.6087	1.0156	13.6087	1.1953
13.6167	0.23995	13.6167	0.38385	13.6168	0.68715	13.617	0.38395	13.617	1.3515	13.6167	0.987	13.617	1.01705	13.617	1.21445
13.625	0.2397	13.625	0.3821	13.6252	0.6873	13.6253	0.3837	13.6253	1.38585	13.625	0.98725	13.6253	1.0155	13.6253	1.23665
13.6333	0.2393	13.6333	0.38275	13.6335	0.6894	13.6337	0.3814	13.6337	1.4195	13.6333	0.98615	13.6337	1.0172	13.6337	1.2556
13.6417	0.2416	13.6417	0.38375	13.6418	0.6932	13.642	0.3838	13.642	1.4541	13.6417	0.99065	13.642	1.0202	13.642	1.2773
13.65	0.2413	13.65	0.38325	13.6502	0.6963	13.6503	0.38295	13.6503	1.4876	13.65	0.99565	13.6503	1.0225	13.6503	1.29685
13.6583	0.24195	13.6583	0.38425	13.6585	0.69655	13.6587	0.3855	13.6587	1.5244	13.6583	0.9962	13.6587	1.0225	13.6587	1.3166
13.6667	0.24245	13.6667	0.38585	13.6668	0.7001	13.667	0.3861	13.667	1.55915	13.6667	1.00095	13.667	1.02545	13.667	1.3351
13.675	0.2427	13.675	0.38635	13.6752	0.70635	13.6753	0.3854	13.6753	1.59245	13.675	1.00605	13.6753	1.0294	13.6753	1.35225
13.6833	0.24405	13.6833	0.39005	13.6835	0.7106	13.6837	0.38875	13.6837	1.6273	13.6833	1.01055	13.6837	1.0332	13.6837	1.37295
13.6917	0.2433	13.6917	0.38965	13.6918	0.71305	13.692	0.38845	13.692	1.66555	13.6917	1.013	13.692	1.03525	13.692	1.3921
13.7	0.24685	13.7	0.3913	13.7002	0.7194	13.7003	0.3903	13.7003	1.6958	13.7	1.0194	13.7003	1.0422	13.7003	1.40975
13.7083	0.2477	13.7083	0.39265	13.7085	0.7232	13.7087	0.38975	13.7087	1.7323	13.7083	1.0255	13.7087	1.0448	13.7087	1.43085
13.7167	0.24755	13.7167	0.39335	13.7168	0.7286	13.717	0.39265	13.717	1.7667	13.7167	1.02785	13.717	1.04915	13.717	1.4524
13.725	0.24845	13.725	0.396	13.7252	0.73265	13.7253	0.3952	13.7253	1.80495	13.725	1.03535	13.7253	1.05505	13.7253	1.4737
13.7333	0.24875	13.7333	0.394	13.7335	0.74045	13.7337	0.39775	13.7337	1.8441	13.7333	1.03935	13.7337	1.0587	13.7337	1.49545
13.7417	0.2466	13.7417	0.39305	13.7418	0.74585	13.742	0.4011	13.742	1.888	13.7417	1.0459	13.742	1.06555	13.742	1.5191
13.75	0.24625	13.75	0.39485	13.7502	0.75005	13.7503	0.4035	13.7503	1.9373	13.75	1.04985	13.7503	1.06955	13.7503	1.5462
13.7583	0.25005	13.7583	0.39705	13.7585	0.75615	13.7587	0.40415	13.7587	1.991	13.7583	1.05765	13.7587	1.0765	13.7587	1.5749
13.7667	0.25065	13.7667	0.40005	13.7668	0.7598	13.767	0.4095	13.767	2.05055	13.7667	1.05955	13.767	1.0795	13.767	1.60685
13.775	0.2507	13.775	0.40005	13.7752	0.76665	13.7753	0.4115	13.7753	2.11335	13.775	1.0649	13.7753	1.08735	13.7753	1.64245
13.7833	0.2525	13.7833	0.39915	13.7835	0.7737	13.7837	0.41665	13.7837	2.1833	13.7833	1.0718	13.7837	1.09265	13.7837	1.6832
13.7917	0.25175	13.7917	0.40305	13.7918	0.7766	13.792	0.41885	13.792	2.2531	13.7917	1.0745	13.792	1.09595	13.792	1.72855
13.8	0.2535	13.8	0.4008	13.8002	0.78265	13.8003	0.4219	13.8003	2.3213	13.8	1.0786	13.8003	1.1018	13.8003	1.7757
13.8083	0.254	13.8083	0.4018	13.8085	0.78575	13.8087	0.42055	13.8087	2.39195	13.8083	1.08335	13.8087	1.11035	13.8087	1.82825
13.8167	0.25215	13.8167	0.4011	13.8168	0.7908	13.817	0.42445	13.817	2.4583	13.8167	1.08365	13.817	1.1132	13.817	1.88085
13.825	0.2531	13.825	0.40365	13.8252	0.79365	13.8253	0.4251	13.8253	2.5173	13.825	1.0847	13.8253	1.11755	13.8253	1.9375
13.8333	0.25215	13.8333	0.3997	13.8335	0.79625	13.8337	0.4286	13.8337	2.56755	13.8333	1.0887	13.8337	1.1205	13.8337	1.9942
13.8417	0.2526	13.8417	0.4019	13.8418	0.7994	13.842	0.42775	13.842	2.60905	13.8417	1.08905	13.842	1.1242	13.842	2.0486
13.85	0.2523	13.85	0.4002	13.8502	0.7978	13.8503	0.43105	13.8503	2.6409	13.85	1.08825	13.8503	1.124	13.8503	2.09935
13.8583	0.2531	13.8583	0.39845	13.8585	0.8015	13.8587	0.43305	13.8587	2.6586	13.8583	1.08985	13.8587	1.12885	13.8587	2.1473
13.8667	0.25125	13.8667	0.40125	13.8668	0.8004	13.867	0.4328	13.867	2.66615	13.8667	1.08905	13.867	1.12965	13.867	2.1869
13.875	0.2509	13.875	0.40065	13.8752	0.79965	13.8753	0.43285	13.8753	2.6625	13.875	1.08595	13.8753	1.12795	13.8753	2.2215
13.8833	0.2514	13.8833	0.3978	13.8835	0.80045	13.8837	0.433	13.8837	2.64675	13.8833	1.08475	13.8837	1.12865	13.8837	2.24605
13.8917	0.2508	13.8917	0.40035	13.8918	0.7963	13.892	0.4321	13.892	2.61965	13.8917	1.08055	13.892	1.1253	13.892	2.2628
13.9	0.2528	13.9	0.39935	13.9002	0.7931	13.9003	0.4286	13.9003	2.58365	13.9	1.07705	13.9003	1.12435	13.9003	2.2714
13.9083	0.25055	13.9083	0.3955	13.9085	0.79305	13.9087	0.43005	13.9087	2.53815	13.9083	1.0746	13.9087	1.12265	13.9087	2.2678
13.9167	0.24955	13.9167	0.3964	13.9168	0.78735	13.917	0.4277	13.917	2.48455	13.9167	1.07	13.917	1.11945	13.917	2.25305
13.925	0.24745	13.925	0.39525	13.9252	0.7844	13.9253	0.42655	13.9253	2.4252	13.925	1.06495	13.9253	1.114	13.9253	2.2325
13.9333	0.2483	13.9333	0.3953	13.9335	0.77855	13.9337	0.4239	13.9337	2.36195	13.9333	1.0604	13.9337	1.11205	13.9337	2.2045
13.9417	0.24805	13.9417	0.39535	13.9418	0.77575	13.942	0.4209	13.942	2.29375	13.9417	1.0546	13.942	1.1065	13.942	2.1674
13.95	0.251	13.95	0.3981	13.9502	0.77015	13.9503	0.41615	13.9503	2.2259	13.95	1.0514	13.9503	1.10295	13.9503	2.12495
13.9583	0.24625	13.9583	0.39285	13.9585	0.76355	13.9587	0.41495	13.9587	2.1511	13.9583	1.04575	13.9587	1.09525	13.9587	2.08025
13.9667	0.2465	13.9667	0.3939	13.9668	0.7584	13.967	0.4101	13.967	2.0785	13.9667	1.03895	13.967	1.0893	13.967	2.0275
13.975	0.24485	13.975	0.39175	13.9752	0.75345	13.9753	0.4075	13.9753	2.0059	13.975	1.0345	13.9753	1.084	13.9753	1.9694
13.9833	0.2457	13.9833	0.39245	13.9835	0.74725	13.9837	0.4044	13.9837	1.9352	13.9833	1.02855	13.9837	1.07525	13.9837	1.912
13.9917	0.24485	13.9917	0.393	13.9918	0.74165	13.992	0.40185	13.992	1.8683	13.9917	1.02575	13.992	1.0713	13.992	1.85195
14	0.2449	14	0.3916	14.0002	0.7341	14.0003	0.39575	14.0003	1.8032	14	1.01795	14.0003	1.0622	14.0003	1.7931
14.0083	0.24445	14.0083	0.3921	14.0085	0.72995	14.0087	0.3962	14.0087	1.7398	14.0083	1.01435	14.0087	1.05925	14.0087	1.73
14.0167	0.24215	14.0167	0.391	14.0168	0.7252	14.017	0.39275	14.017	1.6778	14.0167	1.00945	14.017	1.05025	14.017	1.66845
14.025	0.24465	14.025	0.3931	14.0252	0.7227	14.0253	0.3882	14.0253	1.6204	14.025	1.0088	14.0253	1.0488	14.0253	1.61175
14.0333	0.24355	14.0333	0.38895	14.0335	0.7154	14.0337	0.38545	14.0337	1.5653	14.0333	1.0022	14.0337	1.0416	14.0337	1.5524
14.0417	0.2441	14.0417	0.39095	14.0418	0.7113	14.042	0.384	14.042	1.5134	14.0417	0.99795	14.042	1.0365	14.042	1.49845
14.05	0.2453	14.05	0.3908	14.0502	0.7103	14.0503	0.3823	14.0503	1.46755	14.05	0.99705	14.0503	1.03185	14.0503	1.4444
14.0583	0.24465	14.0583	0.38955	14.0585	0.70255	14.0587	0.379	14.0587	1.42355	14.0583	0.9908	14.0587	1.0253	14.0587	1.3935
14.0667	0.24235	14.0667	0.3906	14.0668	0.69925	14.067	0.3767	14.067	1.38315	14.0667	0.98665	14.067	1.0204	14.067	1.3474
14.075	0.24085	14.075	0.3904	14.0752	0.69545	14.0753	0.37735	14.0753	1.34715	14.075	0.984	14.0753	1.0177	14.0753	1.30525
14.0833	0.24	14.0833	0.39425	14.0835	0.695	14.0837	0.37475	14.0837	1.31235	14.0833	0.98285	14.0837	1.0143	14.0837	1.2641
14.0917	0.24015	14.0917	0.39315	14.0918	0.68965	14.092	0.3692	14.092	1.28185	14.0917	0.97845	14.092	1.01005	14.092	1.2275
14.1	0.2395	14.1	0.3941	14.1002	0.6862	14.1003	0.3715	14.1003	1.24995	14.1	0.97565	14.1003	1.00635	14.1003	1.1888
14.1083	0.23805	14.1083	0.3975	14.1085	0.6841	14.1087	0.36835	14.1087	1.22495	14.1083	0.9733	14.1087	1.00205	14.1087	1.1595
14.1167	0.2379	14.1167	0.40265	14.1168	0.6821	14.117	0.3679	14.117	1.20055	14.1167	0.97155	14.117	1.0014	14.117	1.12915
14.125	0.2369	14.125	0.40545	14.1252	0.67945	14.1253	0.3661	14.1253	1.17745	14.125	0.97105	14.1253	0.99885	14.1253	1.10155
14.1333	0.23655	14.1333	0.4124	14.1335	0.67825	14.1337	0.3657	14.1337	1.15605	14.1333	0.967	14.1337	0.99545	14.1337	1.07765
14.1417	0.23675	14.1417	0.4146	14.1418	0.6769	14.142	0.3628	14.142	1.136	14.1417	0.96605	14.142	0.9942	14.142	1.05505
14.15	0.238	14.15	0.4208	14.1502	0.6779	14.1503	0.3634	14.1503	1.1188	14.15	0.96585	14.1503	0.99385	14.1503	1.0336
14.1583	0.23775	14.1583	0.4273	14.1585	0.6751	14.1587	0.3628	14.1587	1.1036	14.1583	0.96565	14.1587	0.9921	14.1587	1.01495
14.1667	0.2379	14.1667	0.43455	14.1668	0.67375	14.167	0.3612	14.167	1.0868	14.1667	0.96565	14.167	0.9932	14.167	0.99635
14.175	0.23845	14.175	0.44225	14.1752	0.67515	14.1753	0.36015	14.1753	1.0732	14.175	0.9658	14.1753	0.99445	14.1753	0.979
14.1833	0.23745	14.1833	0.44735	14.1835	0.6735	14.1837	0.3602	14.1837	1.06005	14.1833	0.965	14.1837	0.9914	14.1837	0.9619
14.1917	0.23675	14.1917	0.45555	14.1918	0.6749	14.192	0.36025	14.192	1.04855	14.1917	0.9642	14.192	0.9945	14.192	0.94845
14.2	0.2363	14.2	0.46055	14.2002	0.6751	14.2003	0.36095	14.2003	1.03625	14.2	0.9652	14.2003	0.99585	14.2003	0.9325
14.2083	0.23575	14.2083	0.46675	14.2085	0.6757	14.2087	0.35965	14.2087	1.03005	14.2083	0.9683	14.2087	0.9977	14.2087	0.9225
14.2167	0.2346	14.2167	0.4723	14.2168	0.67585	14.217	0.36035	14.217	1.01695	14.2167	0.96745	14.217	0.99815	14.217	0.90815
14.225	0.23525	14.225	0.4808	14.2252	0.67825	14.2253	0.36285	14.2253	1.00895	14.225	0.969	14.2253	1.00015	14.2253	0.8979
14.2333	0.23525	14.2333	0.4837	14.2335	0.6821	14.2337	0.36285	14.2337	0.9989	14.2333	0.9746	14.2337	1.00605	14.2337	0.8349
14.2417	0.23775	14.2417	0.4895	14.2418	0.68325	14.242	0.36385	14.242	0.9927	14.2417	0.9748	14.242	1.00725	14.242	0.84845
14.25	0.23445	14.25	0.49115	14.2502	0.6904	14.2503	0.3633	14.2503	0.98815	14.25	0.9834	14.2503	1.0171	14.2503	0.8595
14.2583	0.2358	14.2583	0.49585	14.2585	0.6932	14.2587	0.3666	14.2587	0.9826	14.2583	0.9861	14.2587	1.0171	14.2587	0.8553
14.2667	0.23625	14.2667	0.4984	14.2668	0.70005	14.267	0.36695	14.267	0.9775	14.2667	0.9972	14.267	1.0326	14.267	0.8496
14.275	0.23425	14.275	0.4992	14.2752	0.68625	14.2753	0.36865	14.2753	0.97235	14.275	0.98585	14.2753	1.01895	14.2753	0.84485
14.2833	0.23375	14.2833	0.4978	14.2835	0.7531	14.2837	0.37165	14.2837	0.9684	14.2833	1.05455	14.2837	1.08845	14.2837	0.8371
14.2917	0.23245	14.2917	0.49455	14.2918	0.7367	14.292	0.377	14.292	0.9607	14.2917	1.0411	14.292	1.073	14.292	0.82875
14.3	0.23125	14.3	0.4956	14.3002	0.71815	14.3003	0.38105	14.3003	0.9562	14.3	1.0247	14.3003	1.05545	14.3003	0.8223
14.3083	0.232	14.3083	0.49285	14.3085	0.7616	14.3087	0.3873	14.3087	0.95135	14.3083	1.07215	14.3087	1.1029	14.3087	0.81655
14.3167	0.23055	14.3167	0.4887	14.3168	0.7712	14.317	0.39555	14.317	0.94905	14.3167	1.0877	14.317	1.11555	14.317	0.81405
14.325	0.23275	14.325	0.48595	14.3252	0.7787	14.3253	0.4049	14.3253	0.94645	14.325	1.0966	14.3253	1.126	14.3253	0.8074
14.3333	0.23335	14.3333	0.48105	14.3335	0.7944	14.3337	0.41515	14.3337	0.9428	14.3333	1.11485	14.3337	1.145	14.3337	0.8039
14.3417	0.23035	14.3417	0.4736	14.3418	0.8134	14.342	0.4262	14.342	0.9406	14.3417	1.13925	14.342	1.16745	14.342	0.80095
14.35	0.23005	14.35	0.4692	14.3502	0.8368	14.3503	0.4425	14.3503	0.93705	14.35	1.16745	14.3503	1.1943	14.3503	0.7978
14.3583	0.2294	14.3583	0.4629	14.3585	0.8648	14.3587	0.45865	14.3587	0.93305	14.3583	1.1998	14.3587	1.22675	14.3587	0.7918
14.3667	0.231	14.3667	0.4559	14.3668	0.89545	14.367	0.4767	14.367	0.9314	14.3667	1.2299	14.367	1.258	14.367	0.79035
14.375	0.2318	14.375	0.44845	14.3752	0.92785	14.3753	0.4981	14.3753	0.9327	14.375	1.26735	14.3753	1.2953	14.3753	0.7876
14.3833	0.2293	14.3833	0.4419	14.3835	0.9611	14.3837	0.523	14.3837	0.9309	14.3833	1.30845	14.3837	1.32945	14.3837	0.78635
14.3917	0.2293	14.3917	0.4355	14.3918	0.9979	14.392	0.55005	14.392	0.92875	14.3917	1.3496	14.392	1.3694	14.392	0.7827
14.4	0.22795	14.4	0.427	14.4002	1.03775	14.4003	0.5802	14.4003	0.9269	14.4	1.38825	14.4003	1.40915	14.4003	0.78045
14.4083	0.2272	14.4083	0.4194	14.4085	1.07685	14.4087	0.61165	14.4087	0.92565	14.4083	1.4332	14.4087	1.4498	14.4087	0.77755
14.4167	0.22645	14.4167	0.41205	14.4168	1.12195	14.417	0.6441	14.417	0.9238	14.4167	1.47775	14.417	1.49145	14.417	0.77315
14.425	0.2271	14.425	0.4054	14.4252	1.16515	14.4253	0.67965	14.4253	0.9212	14.425	1.5236	14.4253	1.53435	14.4253	0.76995
14.4333	0.2252	14.4333	0.3983	14.4335	1.2122	14.4337	0.71705	14.4337	0.9237	14.4333	1.5674	14.4337	1.5771	14.4337	0.76975
14.4417	0.2224	14.4417	0.39105	14.4418	1.25875	14.442	0.7542	14.442	0.922	14.4417	1.61685	14.442	1.6182	14.442	0.76905
14.45	0.2236	14.45	0.3878	14.4502	1.3034	14.4503	0.79495	14.4503	0.9225	14.45	1.6595	14.4503	1.65855	14.4503	0.76665
14.4583	0.2219	14.4583	0.3797	14.4585	1.34905	14.4587	0.83375	14.4587	0.92045	14.4583	1.7123	14.4587	1.69835	14.4587	0.7667
14.4667	0.2226	14.4667	0.37825	14.4668	1.39175	14.467	0.87305	14.467	0.91955	14.4667	1.7466	14.467	1.735	14.467	0.76395
14.475	0.221	14.475	0.3709	14.4752	1.43485	14.4753	0.91175	14.4753	0.91765	14.475	1.7846	14.4753	1.76995	14.4753	0.7617
14.4833	0.22265	14.4833	0.3671	14.4835	1.4738	14.4837	0.9477	14.4837	0.916	14.4833	1.82095	14.4837	1.79855	14.4837	0.75835
14.4917	0.22225	14.4917	0.363	14.4918	1.5098	14.492	0.98455	14.492	0.9132	14.4917	1.8535	14.492	1.82545	14.492	0.7556
14.5	0.22255	14.5	0.36105	14.5002	1.54585	14.5003	1.01705	14.5003	0.91355	14.5	1.8833	14.5003	1.84975	14.5003	0.74645
14.5083	0.22195	14.5083	0.3596	14.5085	1.57505	14.5087	1.0487	14.5087	0.91195	14.5083	1.9083	14.5087	1.8672	14.5087	0.7523
14.5167	0.22295	14.5167	0.3574	14.5168	1.60305	14.517	1.0785	14.517	0.9082	14.5167	1.92905	14.517	1.88205	14.517	0.75065
14.525	0.22215	14.525	0.35615	14.5252	1.6239	14.5253	1.10015	14.5253	0.9099	14.525	1.94275	14.5253	1.8888	14.5253	0.7531
14.5333	0.22455	14.5333	0.35505	14.5335	1.64145	14.5337	1.1212	14.5337	0.90855	14.5333	1.955	14.5337	1.89355	14.5337	0.7516
14.5417	0.22625	14.5417	0.35565	14.5418	1.6528	14.542	1.1342	14.542	0.90725	14.5417	1.95745	14.542	1.8895	14.542	0.7495
14.55	0.224	14.55	0.35295	14.5502	1.6621	14.5503	1.1446	14.5503	0.90595	14.55	1.95835	14.5503	1.88675	14.5503	0.7493
14.5583	0.2242	14.5583	0.35105	14.5585	1.6595	14.5587	1.14985	14.5587	0.90505	14.5583	1.9483	14.5587	1.87305	14.5587	0.7474
14.5667	0.22275	14.5667	0.3511	14.5668	1.6541	14.567	1.15125	14.567	0.90395	14.5667	1.9361	14.567	1.85355	14.567	0.7478
14.575	0.22515	14.575	0.35045	14.5752	1.64605	14.5753	1.1461	14.5753	0.90515	14.575	1.91955	14.5753	1.8337	14.5753	0.7468
14.5833	0.2262	14.5833	0.3509	14.5835	1.62985	14.5837	1.13545	14.5837	0.9022	14.5833	1.8968	14.5837	1.80835	14.5837	0.74455
14.5917	0.22325	14.5917	0.3474	14.5918	1.61055	14.592	1.12255	14.592	0.90245	14.5917	1.8697	14.592	1.779	14.592	0.7449
14.6	0.22465	14.6	0.3469	14.6002	1.5832	14.6003	1.10425	14.6003	0.90235	14.6	1.83935	14.6003	1.7469	14.6003	0.74465
14.6083	0.22535	14.6083	0.3512	14.6085	1.55455	14.6087	1.0833	14.6087	0.9015	14.6083	1.80365	14.6087	1.70995	14.6087	0.7439
14.6167	0.22645	14.6167	0.34885	14.6168	1.52015	14.617	1.0574	14.617	0.89995	14.6167	1.7663	14.617	1.67235	14.617	0.74215
14.625	0.22655	14.625	0.3495	14.6252	1.48225	14.6253	1.0538	14.6253	0.9029	14.625	1.7249	14.6253	1.631	14.6253	0.7432
14.6333	0.2243	14.6333	0.34745	14.6335	1.44315	14.6337	0.9974	14.6337	0.9018	14.6333	1.6837	14.6337	1.5917	14.6337	0.7397
14.6417	0.22775	14.6417	0.34925	14.6418	1.4021	14.642	0.9609	14.642	0.90155	14.6417	1.63875	14.642	1.54825	14.642	0.73965
14.65	0.22885	14.65	0.3501	14.6502	1.357	14.6503	0.92425	14.6503	0.8987	14.65	1.594	14.6503	1.50615	14.6503	0.7389
14.6583	0.2305	14.6583	0.35045	14.6585	1.3095	14.6587	0.88905	14.6587	0.8977	14.6583	1.5475	14.6587	1.46285	14.6587	0.7379
14.6667	0.2291	14.6667	0.34925	14.6668	1.264	14.667	0.85205	14.667	0.897	14.6667	1.4998	14.667	1.41895	14.667	0.7343
14.675	0.2333	14.675	0.35335	14.6752	1.218	14.6753	0.8141	14.6753	0.89755	14.675	1.45435	14.6753	1.3804	14.6753	0.7343
14.6833	0.23005	14.6833	0.3489	14.6835	1.17295	14.6837	0.77375	14.6837	0.8938	14.6833	1.4095	14.6837	1.34025	14.6837	0.73105
14.6917	0.23085	14.6917	0.352	14.6918	1.12755	14.692	0.73705	14.692	0.89415	14.6917	1.3652	14.692	1.3019	14.692	0.7333
14.7	0.2322	14.7	0.3519	14.7002	1.0812	14.7003	0.6985	14.7003	0.893	14.7	1.32295	14.7003	1.26645	14.7003	0.7315
14.7083	0.2318	14.7083	0.3509	14.7085	1.04185	14.7087	0.66365	14.7087	0.89055	14.7083	1.2821	14.7087	1.23235	14.7087	0.7296
14.7167	0.23375	14.7167	0.3528	14.7168	1.00015	14.717	0.6291	14.717	0.88935	14.7167	1.2445	14.717	1.20265	14.717	0.7309
14.725	0.23435	14.725	0.3535	14.7252	0.96255	14.7253	0.5953	14.7253	0.8868	14.725	1.2089	14.7253	1.1729	14.7253	0.72965
14.7333	0.2332	14.7333	0.3524	14.7335	0.92645	14.7337	0.5635	14.7337	0.8854	14.7333	1.17475	14.7337	1.1459	14.7337	0.7287
14.7417	0.2332	14.7417	0.35375	14.7418	0.894	14.742	0.53385	14.742	0.8861	14.7417	1.14435	14.742	1.1218	14.742	0.7288
14.75	0.23435	14.75	0.35325	14.7502	0.8621	14.7503	0.5082	14.7503	0.88565	14.75	1.11505	14.7503	1.10015	14.7503	0.7271
14.7583	0.2341	14.7583	0.28305	14.7585	0.83405	14.7587	0.48535	14.7587	0.88545	14.7583	1.09	14.7587	1.0812	14.7587	0.7366
14.7667	0.2343	14.7667	0.41835	14.7668	0.8082	14.767	0.46175	14.767	0.8844	14.7667	1.06645	14.767	1.0621	14.767	0.7218
14.775	0.2361	14.775	0.4061	14.7752	0.78555	14.7753	0.44205	14.7753	0.88445	14.775	1.04705	14.7753	1.04825	14.7753	0.7244
14.7833	0.2363	14.7833	0.33105	14.7835	0.76445	14.7837	0.42435	14.7837	0.8838	14.7833	1.02845	14.7837	1.03365	14.7837	0.7234
14.7917	0.2354	14.7917	0.34715	14.7918	0.7474	14.792	0.40855	14.792	0.88205	14.7917	1.0128	14.792	1.0239	14.792	0.72235
14.8	0.23395	14.8	0.3485	14.8002	0.73295	14.8003	0.3946	14.8003	0.88325	14.8	1.00045	14.8003	1.01525	14.8003	0.72225
14.8083	0.23355	14.8083	0.35235	14.8085	0.7171	14.8087	0.38255	14.8087	0.882	14.8083	0.987	14.8087	1.0046	14.8087	0.7227
14.8167	0.23455	14.8167	0.3517	14.8168	0.70535	14.817	0.36915	14.817	0.88385	14.8167	0.9756	14.817	0.99835	14.817	0.72115
14.825	0.23455	14.825	0.35215	14.8252	0.6921	14.8253	0.364	14.8253	0.883	14.825	0.96405	14.8253	0.9898	14.8253	0.7225
14.8333	0.2365	14.8333	0.3526	14.8335	0.6828	14.8337	0.3522	14.8337	0.88185	14.8333	0.9578	14.8337	0.9853	14.8337	0.7228
14.8417	0.2376	14.8417	0.35165	14.8418	0.6751	14.842	0.3447	14.842	0.8815	14.8417	0.94895	14.842	0.98085	14.842	0.7244
14.85	0.23665	14.85	0.35365	14.8502	0.66645	14.8503	0.34015	14.8503	0.8802	14.85	0.94395	14.8503	0.9776	14.8503	0.72335
14.8583	0.2363	14.8583	0.35275	14.8585	0.66045	14.8587	0.33135	14.8587	0.8802	14.8583	0.93795	14.8587	0.97095	14.8587	0.7248
14.8667	0.23585	14.8667	0.35185	14.8668	0.65645	14.867	0.3251	14.867	0.8798	14.8667	0.9348	14.867	0.97165	14.867	0.72735
14.875	0.2356	14.875	0.3526	14.8752	0.6504	14.8753	0.3234	14.8753	0.8804	14.875	0.92795	14.8753	0.9653	14.8753	0.7304
14.8833	0.23465	14.8833	0.3509	14.8835	0.64415	14.8837	0.32055	14.8837	0.8835	14.8833	0.92365	14.8837	0.9622	14.8837	0.7363
14.8917	0.2357	14.8917	0.35265	14.8918	0.64265	14.892	0.31725	14.892	0.88575	14.8917	0.9208	14.892	0.9603	14.892	0.74245
14.9	0.2356	14.9	0.3514	14.9002	0.6404	14.9003	0.31215	14.9003	0.8858	14.9	0.9183	14.9003	0.959	14.9003	0.74695
14.9083	0.23415	14.9083	0.3521	14.9085	0.6359	14.9087	0.30955	14.9087	0.89125	14.9083	0.91355	14.9087	0.95535	14.9087	0.75475
14.9167	0.23395	14.9167	0.35045	14.9168	0.63535	14.917	0.3077	14.917	0.89625	14.9167	0.91315	14.917	0.95655	14.917	0.76645
14.925	0.2334	14.925	0.3515	14.9252	0.63185	14.9253	0.3033	14.9253	0.9032	14.925	0.91175	14.9253	0.9547	14.9253	0.7777
14.9333	0.23335	14.9333	0.3507	14.9335	0.6291	14.9337	0.3018	14.9337	0.91025	14.9333	0.90835	14.9337	0.9529	14.9337	0.7886
14.9417	0.23415	14.9417	0.3504	14.9418	0.6283	14.942	0.29945	14.942	0.92065	14.9417	0.90665	14.942	0.9524	14.942	0.80245
14.95	0.23485	14.95	0.35125	14.9502	0.62565	14.9503	0.29875	14.9503	0.9326	14.95	0.9027	14.9503	0.94975	14.9503	0.8158
14.9583	0.2313	14.9583	0.35045	14.9585	0.6245	14.9587	0.29625	14.9587	0.9458	14.9583	0.9026	14.9587	0.94945	14.9587	0.83085
14.9667	0.23345	14.9667	0.35	14.9668	0.62305	14.967	0.2945	14.967	0.9606	14.9667	0.9	14.967	0.94875	14.967	0.845
14.975	0.23495	14.975	0.3499	14.9752	0.6215	14.9753	0.29445	14.9753	0.97835	14.975	0.90025	14.9753	0.9478	14.9753	0.86145
14.9833	0.2331	14.9833	0.3511	14.9835	0.62115	14.9837	0.29085	14.9837	0.9952	14.9833	0.89885	14.9837	0.94825	14.9837	0.878
14.9917	0.2339	14.9917	0.3506	14.9918	0.6194	14.992	0.2916	14.992	1.0127	14.9917	0.8981	14.992	0.9465	14.992	0.89235
15	0.23225	15	0.3493	15.0002	0.61725	15.0003	0.28925	15.0003	1.0356	15	0.8948	15.0003	0.9452	15.0003	0.90915
15.0083	0.23365	15.0083	0.34935	15.0085	0.61565	15.0087	0.2865	15.0087	1.0568	15.0083	0.8939	15.0087	0.9436	15.0087	0.9239
15.0167	0.23285	15.0167	0.35015	15.0168	0.61335	15.017	0.28635	15.017	1.0766	15.0167	0.89195	15.017	0.94215	15.017	0.9366
15.025	0.2355	15.025	0.35	15.0252	0.61345	15.0253	0.2848	15.0253	1.09675	15.025	0.89195	15.0253	0.94215	15.0253	0.9423
15.0333	0.23385	15.0333	0.34925	15.0335	0.6115	15.0337	0.28375	15.0337	1.1176	15.0333	0.8892	15.0337	0.94185	15.0337	0.9621
15.0417	0.2335	15.0417	0.3509	15.0418	0.611	15.042	0.2831	15.042	1.1343	15.0417	0.88985	15.042	0.94115	15.042	0.9719
15.05	0.23655	15.05	0.35075	15.0502	0.60855	15.0503	0.2834	15.0503	1.1524	15.05	0.88805	15.0503	0.93935	15.0503	0.9859
15.0583	0.23405	15.0583	0.35065	15.0585	0.6081	15.0587	0.28045	15.0587	1.16865	15.0583	0.88695	15.0587	0.9392	15.0587	0.9949
15.0667	0.2347	15.0667	0.35045	15.0668	0.6081	15.067	0.28145	15.067	1.1847	15.0667	0.88875	15.067	0.9404	15.067	1.00575
15.075	0.234	15.075	0.34965	15.0752	0.60365	15.0753	0.2799	15.0753	1.1988	15.075	0.8849	15.0753	0.936	15.0753	1.01455
15.0833	0.23385	15.0833	0.3492	15.0835	0.6393	15.0837	0.28185	15.0837	1.21175	15.0833	0.9198	15.0837	0.97095	15.0837	1.0239
15.0917	0.23335	15.0917	0.35075	15.0918	0.7035	15.092	0.2773	15.092	1.2247	15.0917	0.98545	15.092	1.03615	15.092	1.03285
15.1	0.23395	15.1	0.3503	15.1002	0.5763	15.1003	0.2768	15.1003	1.23615	15.1	0.8562	15.1003	0.90875	15.1003	1.0395
15.1083	0.237	15.1083	0.3546	15.1085	0.62905	15.1087	0.2763	15.1087	1.2453	15.1083	0.9095	15.1087	0.96285	15.1087	1.04605
15.1167	0.233	15.1167	0.35095	15.1168	0.6149	15.117	0.27545	15.117	1.25395	15.1167	0.89525	15.117	0.9469	15.117	1.0531
15.125	0.23685	15.125	0.35375	15.1252	0.60555	15.1253	0.2737	15.1253	1.26255	15.125	0.8869	15.1253	0.9396	15.1253	1.05905
15.1333	0.2354	15.1333	0.3515	15.1335	0.6032	15.1337	0.2741	15.1337	1.26825	15.1333	0.884	15.1337	0.93715	15.1337	1.06315
15.1417	0.2346	15.1417	0.3515	15.1418	0.60215	15.142	0.2723	15.142	1.2748	15.1417	0.8823	15.142	0.93655	15.142	1.0684
15.15	0.2357	15.15	0.3519	15.1502	0.60265	15.1503	0.2745	15.1503	1.2795	15.15	0.8838	15.1503	0.93615	15.1503	1.0735
15.1583	0.23465	15.1583	0.34775	15.1585	0.601	15.1587	0.27285	15.1587	1.28525	15.1583	0.88135	15.1587	0.93585	15.1587	1.07855
15.1667	0.23435	15.1667	0.34785	15.1668	0.60195	15.167	0.27475	15.167	1.28785	15.1667	0.8825	15.167	0.9364	15.167	1.0834
15.175	0.2346	15.175	0.34735	15.1752	0.5989	15.1753	0.2753	15.1753	1.29205	15.175	0.8812	15.1753	0.93505	15.1753	1.0889
15.1833	0.23295	15.1833	0.347	15.1835	0.60115	15.1837	0.27345	15.1837	1.29525	15.1833	0.8814	15.1837	0.93615	15.1837	1.09065
15.1917	0.2313	15.1917	0.3443	15.1918	0.60025	15.192	0.2747	15.192	1.3007	15.1917	0.88095	15.192	0.93585	15.192	1.0981
15.2	0.234	15.2	0.344	15.2002	0.59915	15.2003	0.27485	15.2003	1.30635	15.2	0.88035	15.2003	0.93285	15.2003	1.1061
15.2083	0.23405	15.2083	0.3435	15.2085	0.59935	15.2087	0.27625	15.2087	1.3108	15.2083	0.8797	15.2087	0.93275	15.2087	1.11395
15.2167	0.2354	15.2167	0.34215	15.2168	0.5981	15.217	0.2753	15.217	1.31385	15.2167	0.87955	15.217	0.932	15.217	1.12415
15.225	0.23485	15.225	0.3421	15.2252	0.5957	15.2253	0.27775	15.2253	1.316	15.225	0.8786	15.2253	0.931	15.2253	1.1317
15.2333	0.2365	15.2333	0.3414	15.2335	0.5971	15.2337	0.2793	15.2337	1.3243	15.2333	0.87945	15.2337	0.93135	15.2337	1.142
15.2417	0.2358	15.2417	0.34055	15.2418	0.59675	15.242	0.2791	15.242	1.32595	15.2417	0.87955	15.242	0.92975	15.242	1.1566
15.25	0.2358	15.25	0.3395	15.2502	0.5965	15.2503	0.27965	15.2503	1.33335	15.25	0.878	15.2503	0.9287	15.2503	1.17165
15.2583	0.23445	15.2583	0.339	15.2585	0.5965	15.2587	0.28215	15.2587	1.34305	15.2583	0.8795	15.2587	0.93025	15.2587	1.19
15.2667	0.2345	15.2667	0.33755	15.2668	0.59825	15.267	0.2831	15.267	1.35415	15.2667	0.8788	15.267	0.92885	15.267	1.2121
15.275	0.23535	15.275	0.3381	15.2752	0.5984	15.2753	0.285	15.2753	1.367	15.275	0.879	15.2753	0.9286	15.2753	1.23805
15.2833	0.23575	15.2833	0.33675	15.2835	0.59795	15.2837	0.2859	15.2837	1.38305	15.2833	0.87995	15.2837	0.92595	15.2837	1.29295
15.2917	0.2356	15.2917	0.33805	15.2918	0.59685	15.292	0.28705	15.292	1.4002	15.2917	0.87765	15.292	0.9252	15.292	1.29405
15.3	0.2373	15.3	0.3349	15.3002	0.59645	15.3003	0.2866	15.3003	1.4229	15.3	0.88215	15.3003	0.92705	15.3003	1.33625
15.3083	0.2358	15.3083	0.3347	15.3085	0.59885	15.3087	0.288	15.3087	1.4511	15.3083	0.8815	15.3087	0.927	15.3087	1.3811
15.3167	0.2371	15.3167	0.335	15.3168	0.59785	15.317	0.28695	15.317	1.48165	15.3167	0.8801	15.317	0.92535	15.317	1.4267
15.325	0.23775	15.325	0.3351	15.3252	0.59775	15.3253	0.2882	15.3253	1.51695	15.325	0.8801	15.3253	0.9241	15.3253	1.4793
15.3333	0.2386	15.3333	0.33295	15.3335	0.59905	15.3337	0.28955	15.3337	1.55485	15.3333	0.881	15.3337	0.9256	15.3337	1.5352
15.3417	0.2387	15.3417	0.3324	15.3418	0.5986	15.342	0.28995	15.342	1.60085	15.3417	0.8798	15.342	0.9246	15.342	1.5978
15.35	0.23955	15.35	0.332	15.3502	0.59995	15.3503	0.29005	15.3503	1.6508	15.35	0.8813	15.3503	0.9262	15.3503	1.6638
15.3583	0.239	15.3583	0.3299	15.3585	0.60015	15.3587	0.29065	15.3587	1.7038	15.3583	0.88225	15.3587	0.92645	15.3587	1.7343
15.3667	0.23835	15.3667	0.32915	15.3668	0.6023	15.367	0.29145	15.367	1.7595	15.3667	0.88445	15.367	0.9293	15.367	1.8066
15.375	0.2383	15.375	0.3294	15.3752	0.6031	15.3753	0.29115	15.3753	1.8222	15.375	0.8851	15.3753	0.92985	15.3753	1.88255
15.3833	0.24025	15.3833	0.3277	15.3835	0.6047	15.3837	0.29285	15.3837	1.8868	15.3833	0.8847	15.3837	0.93085	15.3837	1.95845
15.3917	0.24015	15.3917	0.3251	15.3918	0.60535	15.392	0.29275	15.392	1.95375	15.3917	0.8886	15.392	0.9312	15.392	2.03625
15.4	0.2391	15.4	0.3261	15.4002	0.60675	15.4003	0.28985	15.4003	2.01995	15.4	0.88935	15.4003	0.93325	15.4003	2.1155
15.4083	0.23895	15.4083	0.3273	15.4085	0.607	15.4087	0.29035	15.4087	2.08405	15.4083	0.8903	15.4087	0.93395	15.4087	2.1904
15.4167	0.23805	15.4167	0.3252	15.4168	0.61035	15.417	0.2918	15.417	2.14675	15.4167	0.8922	15.417	0.9355	15.417	2.26165
15.425	0.2398	15.425	0.3251	15.4252	0.61105	15.4253	0.2894	15.4253	2.20675	15.425	0.89235	15.4253	0.93815	15.4253	2.329
15.4333	0.24025	15.4333	0.32835	15.4335	0.61215	15.4337	0.2901	15.4337	2.26105	15.4333	0.89255	15.4337	0.93845	15.4337	2.39255
15.4417	0.23915	15.4417	0.32835	15.4418	0.6122	15.442	0.2898	15.442	2.3118	15.4417	0.8971	15.442	0.94135	15.442	2.4504
15.45	0.23875	15.45	0.3259	15.4502	0.61515	15.4503	0.29125	15.4503	2.3554	15.45	0.8984	15.4503	0.94095	15.4503	2.50355
15.4583	0.2412	15.4583	0.324	15.4585	0.617	15.4587	0.2883	15.4587	2.3892	15.4583	0.90135	15.4587	0.9448	15.4587	2.5464
15.4667	0.23995	15.4667	0.32535	15.4668	0.6193	15.467	0.28905	15.467	2.41475	15.4667	0.90045	15.467	0.9466	15.467	2.58385
15.475	0.24095	15.475	0.32625	15.4752	0.6192	15.4753	0.28955	15.4753	2.4306	15.475	0.90245	15.4753	0.9467	15.4753	2.6093
15.4833	0.23985	15.4833	0.3282	15.4835	0.62125	15.4837	0.28985	15.4837	2.43675	15.4833	0.90465	15.4837	0.9494	15.4837	2.62685
15.4917	0.2388	15.4917	0.3267	15.4918	0.6236	15.492	0.29135	15.492	2.4336	15.4917	0.90685	15.492	0.95115	15.492	2.63275
15.5	0.24115	15.5	0.31315	15.5002	0.62485	15.5003	0.29095	15.5003	2.4164	15.5	0.90825	15.5003	0.95105	15.5003	2.63095
15.5083	0.2418	15.5083	0.28555	15.5085	0.62575	15.5087	0.2921	15.5087	2.39105	15.5083	0.90705	15.5087	0.9514	15.5087	2.61795
15.5167	0.2393	15.5167	0.34025	15.5168	0.6287	15.517	0.2929	15.517	2.35405	15.5167	0.91095	15.517	0.95555	15.517	2.59275
15.525	0.2387	15.525	0.28105	15.5252	0.6305	15.5253	0.29315	15.5253	2.31155	15.525	0.90995	15.5253	0.95505	15.5253	2.5603
15.5333	0.2385	15.5333	0.3135	15.5335	0.6296	15.5337	0.2951	15.5337	2.25665	15.5333	0.90945	15.5337	0.9533	15.5337	2.51415
15.5417	0.23765	15.5417	0.32125	15.5418	0.629	15.542	0.29465	15.542	2.194	15.5417	0.90825	15.542	0.95265	15.542	2.4613
15.55	0.2387	15.55	0.3253	15.5502	0.63025	15.5503	0.29585	15.5503	2.12485	15.55	0.9106	15.5503	0.95415	15.5503	2.3907
15.5583	0.2391	15.5583	0.32565	15.5585	0.62895	15.5587	0.2984	15.5587	2.05545	15.5583	0.90765	15.5587	0.9521	15.5587	2.3319
15.5667	0.23755	15.5667	0.3265	15.5668	0.62935	15.567	0.29495	15.567	1.9784	15.5667	0.9085	15.567	0.9509	15.567	2.25625
15.575	0.2378	15.575	0.32645	15.5752	0.6274	15.5753	0.2958	15.5753	1.8995	15.575	0.90645	15.5753	0.9484	15.5753	2.1768
15.5833	0.23605	15.5833	0.3237	15.5835	0.627	15.5837	0.2984	15.5837	1.8221	15.5833	0.90525	15.5837	0.94785	15.5837	2.0925
15.5917	0.2385	15.5917	0.32465	15.5918	0.6257	15.592	0.2988	15.592	1.7442	15.5917	0.90315	15.592	0.94525	15.592	2.005
15.6	0.2364	15.6	0.3255	15.6002	0.6241	15.6003	0.29735	15.6003	1.667	15.6	0.90105	15.6003	0.94265	15.6003	1.91565
15.6083	0.2362	15.6083	0.32695	15.6085	0.6213	15.6087	0.29905	15.6087	1.59365	15.6083	0.89955	15.6087	0.9392	15.6087	1.8274
15.6167	0.23465	15.6167	0.3249	15.6168	0.62035	15.617	0.2975	15.617	1.52415	15.6167	0.8973	15.617	0.9375	15.617	1.7383
15.625	0.2348	15.625	0.3256	15.6252	0.61785	15.6253	0.29595	15.6253	1.45925	15.625	0.8951	15.6253	0.9347	15.6253	1.65235
15.6333	0.23415	15.6333	0.32545	15.6335	0.6147	15.6337	0.2949	15.6337	1.39945	15.6333	0.89285	15.6337	0.9327	15.6337	1.57065
15.6417	0.2333	15.6417	0.32635	15.6418	0.61205	15.642	0.29355	15.642	1.3436	15.6417	0.88955	15.642	0.9297	15.642	1.49345
15.65	0.2324	15.65	0.3254	15.6502	0.61065	15.6503	0.29255	15.6503	1.2932	15.65	0.8856	15.6503	0.92695	15.6503	1.4204
15.6583	0.23155	15.6583	0.32415	15.6585	0.60505	15.6587	0.29185	15.6587	1.24945	15.6583	0.8825	15.6587	0.92055	15.6587	1.35275
15.6667	0.23	15.6667	0.32455	15.6668	0.60315	15.667	0.2903	15.667	1.2096	15.6667	0.88085	15.667	0.9183	15.667	1.2867
15.675	0.22865	15.675	0.32265	15.6752	0.60215	15.6753	0.2879	15.6753	1.17335	15.675	0.879	15.6753	0.9174	15.6753	1.22925
15.6833	0.22935	15.6833	0.32375	15.6835	0.60045	15.6837	0.28405	15.6837	1.1433	15.6833	0.87485	15.6837	0.9134	15.6837	1.17625
15.6917	0.2286	15.6917	0.32245	15.6918	0.59625	15.692	0.28195	15.692	1.1167	15.6917	0.8712	15.692	0.9074	15.692	1.1289
15.7	0.2288	15.7	0.3206	15.7002	0.59475	15.7003	0.28005	15.7003	1.09335	15.7	0.87045	15.7003	0.9085	15.7003	1.08375
15.7083	0.22755	15.7083	0.3219	15.7085	0.59215	15.7087	0.27915	15.7087	1.0703	15.7083	0.86755	15.7087	0.90415	15.7087	1.04455
15.7167	0.22805	15.7167	0.32225	15.7168	0.5872	15.717	0.2769	15.717	1.05535	15.7167	0.8638	15.717	0.8994	15.717	1.01345
15.725	0.22425	15.725	0.3191	15.7252	0.5872	15.7253	0.27325	15.7253	1.03855	15.725	0.863	15.7253	0.89845	15.7253	0.9802
15.7333	0.22395	15.7333	0.31765	15.7335	0.5867	15.7337	0.2713	15.7337	1.0228	15.7333	0.8613	15.7337	0.89645	15.7337	0.9523
15.7417	0.22565	15.7417	0.3198	15.7418	0.58725	15.742	0.26895	15.742	1.01065	15.7417	0.865	15.742	0.8948	15.742	0.92885
15.75	0.22655	15.75	0.31995	15.7502	0.58475	15.7503	0.2659	15.7503	1.00215	15.75	0.86175	15.7503	0.89485	15.7503	0.9077
15.7583	0.22555	15.7583	0.32	15.7585	0.58425	15.7587	0.26235	15.7587	0.99355	15.7583	0.8612	15.7587	0.8911	15.7587	0.88885
15.7667	0.22505	15.7667	0.31735	15.7668	0.5839	15.767	0.25805	15.767	0.9846	15.7667	0.86	15.767	0.89075	15.767	0.87215
15.775	0.2242	15.775	0.3182	15.7752	0.58625	15.7753	0.25815	15.7753	0.9766	15.775	0.8631	15.7753	0.8901	15.7753	0.8586
15.7833	0.22445	15.7833	0.3173	15.7835	0.5863	15.7837	0.2574	15.7837	0.97135	15.7833	0.8639	15.7837	0.8902	15.7837	0.84495
15.7917	0.2238	15.7917	0.31915	15.7918	0.58715	15.792	0.25325	15.792	0.96495	15.7917	0.8656	15.792	0.88955	15.792	0.832
15.8	0.22535	15.8	0.31825	15.8002	0.58865	15.8003	0.2511	15.8003	0.9598	15.8	0.8683	15.8003	0.8875	15.8003	0.8227
15.8083	0.2253	15.8083	0.31805	15.8085	0.5902	15.8087	0.248	15.8087	0.95435	15.8083	0.86925	15.8087	0.88765	15.8087	0.8286
15.8167	0.22265	15.8167	0.3151	15.8168	0.5939	15.817	0.24705	15.817	0.94755	15.8167	0.8741	15.817	0.8898	15.817	0.80055
15.825	0.22195	15.825	0.31555	15.8252	0.5983	15.8253	0.2451	15.8253	0.9436	15.825	0.87965	15.8253	0.8873	15.8253	0.79665
15.8333	0.2231	15.8333	0.3148	15.8335	0.60225	15.8337	0.246	15.8337	0.94045	15.8333	0.88505	15.8337	0.88995	15.8337	0.79135
15.8417	0.2189	15.8417	0.31415	15.8418	0.6066	15.842	0.2441	15.842	0.93635	15.8417	0.89125	15.842	0.89115	15.842	0.7859
15.85	0.22165	15.85	0.31205	15.8502	0.61375	15.8503	0.24305	15.8503	0.93345	15.85	0.89895	15.8503	0.89145	15.8503	0.78045
15.8583	0.22045	15.8583	0.31195	15.8585	0.61865	15.8587	0.2419	15.8587	0.92975	15.8583	0.9049	15.8587	0.8922	15.8587	0.7741
15.8667	0.2215	15.8667	0.3109	15.8668	0.6273	15.867	0.2424	15.867	0.9263	15.8667	0.9167	15.867	0.89725	15.867	0.7699
15.875	0.22075	15.875	0.3106	15.8752	0.63385	15.8753	0.24355	15.8753	0.92465	15.875	0.9253	15.8753	0.89895	15.8753	0.76485
15.8833	0.223	15.8833	0.30835	15.8835	0.64135	15.8837	0.24505	15.8837	0.9233	15.8833	0.9304	15.8837	0.90015	15.8837	0.76165
15.8917	0.22415	15.8917	0.31105	15.8918	0.6528	15.892	0.24485	15.892	0.9187	15.8917	0.94625	15.892	0.9069	15.892	0.75715
15.9	0.22435	15.9	0.3101	15.9002	0.66275	15.9003	0.2485	15.9003	0.91785	15.9	0.9594	15.9003	0.9101	15.9003	0.75605
15.9083	0.22575	15.9083	0.31095	15.9085	0.6737	15.9087	0.2489	15.9087	0.91525	15.9083	0.96985	15.9087	0.9145	15.9087	0.75285
15.9167	0.22525	15.9167	0.31005	15.9168	0.686	15.917	0.25215	15.917	0.91375	15.9167	0.98465	15.917	0.9192	15.917	0.74915
15.925	0.22345	15.925	0.30755	15.9252	0.69995	15.9253	0.2501	15.9253	0.91175	15.925	1	15.9253	0.9267	15.9253	0.7469
15.9333	0.22445	15.9333	0.3104	15.9335	0.7114	15.9337	0.2523	15.9337	0.91145	15.9333	1.01505	15.9337	0.9334	15.9337	0.74485
15.9417	0.2252	15.9417	0.3078	15.9418	0.7257	15.942	0.255	15.942	0.91145	15.9417	1.02825	15.942	0.94045	15.942	0.7442
15.95	0.2254	15.95	0.3087	15.9502	0.73905	15.9503	0.25835	15.9503	0.91055	15.95	1.0455	15.9503	0.94795	15.9503	0.74415
15.9583	0.22625	15.9583	0.31065	15.9585	0.75375	15.9587	0.26235	15.9587	0.9105	15.9583	1.0614	15.9587	0.9564	15.9587	0.7426
15.9667	0.2252	15.9667	0.30945	15.9668	0.76775	15.967	0.2642	15.967	0.90825	15.9667	1.0786	15.967	0.9646	15.967	0.74335
15.975	0.2232	15.975	0.30835	15.9752	0.7831	15.9753	0.268	15.9753	0.9052	15.975	1.0954	15.9753	0.9754	15.9753	0.7403
15.9833	0.22605	15.9833	0.30965	15.9835	0.7986	15.9837	0.2729	15.9837	0.90575	15.9833	1.1126	15.9837	0.9836	15.9837	0.74265
15.9917	0.22515	15.9917	0.30895	15.9918	0.81425	15.992	0.27695	15.992	0.90435	15.9917	1.1301	15.992	0.99395	15.992	0.742
16	0.2218	16	0.30695	16.0002	0.82945	16.0003	0.2795	16.0003	0.90485	16	1.14575	16.0003	1.00545	16.0003	0.74555
16.0083	0.2242	16.0083	0.3091	16.0085	0.8442	16.0087	0.28265	16.0087	0.9031	16.0083	1.16255	16.0087	1.0176	16.0087	0.7481
16.0167	0.22545	16.0167	0.30795	16.0168	0.8577	16.017	0.28825	16.017	0.9031	16.0167	1.17725	16.017	1.0308	16.017	0.75215
16.025	0.2269	16.025	0.3085	16.0252	0.87135	16.0253	0.29075	16.0253	0.9025	16.025	1.19315	16.0253	1.0422	16.0253	0.7556
16.0333	0.2253	16.0333	0.30805	16.0335	0.88565	16.0337	0.2966	16.0337	0.90245	16.0333	1.2055	16.0337	1.05575	16.0337	0.7604
16.0417	0.2243	16.0417	0.3061	16.0418	0.89835	16.042	0.2987	16.042	0.90465	16.0417	1.2224	16.042	1.0687	16.042	0.7692
16.05	0.2257	16.05	0.309	16.0502	0.9108	16.0503	0.30335	16.0503	0.90465	16.05	1.23295	16.0503	1.0828	16.0503	0.77455
16.0583	0.22615	16.0583	0.3088	16.0585	0.92165	16.0587	0.3066	16.0587	0.9069	16.0583	1.24525	16.0587	1.0971	16.0587	0.7831
16.0667	0.22515	16.0667	0.3094	16.0668	0.9332	16.067	0.3104	16.067	0.90545	16.0667	1.2543	16.067	1.11085	16.067	0.79045
16.075	0.22675	16.075	0.30735	16.0752	0.9438	16.0753	0.3129	16.0753	0.9066	16.075	1.2663	16.0753	1.12515	16.0753	0.78855
16.0833	0.22175	16.0833	0.30605	16.0835	0.9516	16.0837	0.31545	16.0837	0.9084	16.0833	1.27135	16.0837	1.1369	16.0837	0.8058
16.0917	0.22355	16.0917	0.3079	16.0918	0.9583	16.092	0.31975	16.092	0.9082	16.0917	1.28115	16.092	1.1506	16.092	0.817
16.1	0.2239	16.1	0.3074	16.1002	0.9658	16.1003	0.3226	16.1003	0.9088	16.1	1.2855	16.1003	1.16105	16.1003	0.82635
16.1083	0.22485	16.1083	0.31075	16.1085	0.96925	16.1087	0.3227	16.1087	0.90895	16.1083	1.29285	16.1087	1.1738	16.1087	0.8358
16.1167	0.22275	16.1167	0.30855	16.1168	0.97485	16.117	0.32865	16.117	0.91005	16.1167	1.29615	16.117	1.1858	16.117	0.84575
16.125	0.22275	16.125	0.30825	16.1252	0.97895	16.1253	0.32895	16.1253	0.91055	16.125	1.2984	16.1253	1.19505	16.1253	0.8546
16.1333	0.2236	16.1333	0.3097	16.1335	0.9806	16.1337	0.32865	16.1337	0.91365	16.1333	1.3009	16.1337	1.20455	16.1337	0.8628
16.1417	0.22165	16.1417	0.30665	16.1418	0.98235	16.142	0.33205	16.142	0.91225	16.1417	1.30195	16.142	1.21265	16.142	0.8692
16.15	0.22265	16.15	0.3103	16.1502	0.98325	16.1503	0.3295	16.1503	0.91075	16.15	1.30235	16.1503	1.2218	16.1503	0.87485
16.1583	0.22275	16.1583	0.3127	16.1585	0.98085	16.1587	0.3337	16.1587	0.9114	16.1583	1.2999	16.1587	1.22805	16.1587	0.88
16.1667	0.2223	16.1667	0.30905	16.1668	0.97895	16.167	0.3338	16.167	0.912	16.1667	1.299	16.167	1.2331	16.167	0.8831
16.175	0.2231	16.175	0.3113	16.1752	0.9782	16.1753	0.33075	16.1753	0.90725	16.175	1.29635	16.1753	1.23805	16.1753	0.88285
16.1833	0.2229	16.1833	0.30925	16.1835	0.97525	16.1837	0.3296	16.1837	0.9081	16.1833	1.2945	16.1837	1.2436	16.1837	0.88295
16.1917	0.2245	16.1917	0.30925	16.1918	0.97335	16.192	0.3289	16.192	0.90705	16.1917	1.2899	16.192	1.24745	16.192	0.8837
16.2	0.22275	16.2	0.3103	16.2002	0.96765	16.2003	0.3267	16.2003	0.90605	16.2	1.284	16.2003	1.24865	16.2003	0.88135
16.2083	0.22125	16.2083	0.3098	16.2085	0.96425	16.2087	0.32645	16.2087	0.90395	16.2083	1.27945	16.2087	1.25045	16.2087	0.87895
16.2167	0.2201	16.2167	0.30805	16.2168	0.95995	16.217	0.32345	16.217	0.90275	16.2167	1.27455	16.217	1.2525	16.217	0.87495
16.225	0.2203	16.225	0.30725	16.2252	0.95605	16.2253	0.31995	16.2253	0.90325	16.225	1.2684	16.2253	1.2526	16.2253	0.87225
16.2333	0.2189	16.2333	0.3084	16.2335	0.9509	16.2337	0.3188	16.2337	0.90085	16.2333	1.26405	16.2337	1.25135	16.2337	0.864
16.2417	0.2198	16.2417	0.30795	16.2418	0.9469	16.242	0.318	16.242	0.9009	16.2417	1.2592	16.242	1.2514	16.242	0.85785
16.25	0.21835	16.25	0.3083	16.2502	0.94185	16.2503	0.31295	16.2503	0.90195	16.25	1.2536	16.2503	1.25045	16.2503	0.85135
16.2583	0.22125	16.2583	0.30995	16.2585	0.9362	16.2587	0.3111	16.2587	0.90365	16.2583	1.2459	16.2587	1.24765	16.2587	0.84365
16.2667	0.21875	16.2667	0.30975	16.2668	0.9313	16.267	0.3107	16.267	0.89975	16.2667	1.23915	16.267	1.24465	16.267	0.83565
16.275	0.2208	16.275	0.30815	16.2752	0.92395	16.2753	0.30785	16.2753	0.89915	16.275	1.23285	16.2753	1.24095	16.2753	0.8283
16.2833	0.22155	16.2833	0.31075	16.2835	0.9168	16.2837	0.3074	16.2837	0.8983	16.2833	1.2235	16.2837	1.2354	16.2837	0.8206
16.2917	0.21945	16.2917	0.3077	16.2918	0.91285	16.292	0.30405	16.292	0.89835	16.2917	1.2188	16.292	1.23235	16.292	0.8122
16.3	0.22205	16.3	0.31145	16.3002	0.90885	16.3003	0.2988	16.3003	0.89705	16.3	1.2142	16.3003	1.2294	16.3003	0.80435
16.3083	0.21765	16.3083	0.3091	16.3085	0.90265	16.3087	0.29745	16.3087	0.8979	16.3083	1.2053	16.3087	1.2252	16.3087	0.79675
16.3167	0.22125	16.3167	0.31	16.3168	0.89685	16.317	0.29375	16.317	0.8978	16.3167	1.1998	16.317	1.21985	16.317	0.789
16.325	0.2204	16.325	0.30865	16.3252	0.88805	16.3253	0.29245	16.3253	0.8999	16.325	1.18995	16.3253	1.21235	16.3253	0.78205
16.3333	0.21715	16.3333	0.30885	16.3335	0.8831	16.3337	0.2885	16.3337	0.8985	16.3333	1.1838	16.3337	1.2085	16.3337	0.8053
16.3417	0.2193	16.3417	0.3102	16.3418	0.8772	16.342	0.28715	16.342	0.8982	16.3417	1.17485	16.342	1.2028	16.342	0.7651
16.35	0.21805	16.35	0.30965	16.3502	0.86735	16.3503	0.28515	16.3503	0.8994	16.35	1.1677	16.3503	1.19515	16.3503	0.76375
16.3583	0.22105	16.3583	0.3105	16.3585	0.8607	16.3587	0.28235	16.3587	0.8984	16.3583	1.15925	16.3587	1.1884	16.3587	0.7594
16.3667	0.21645	16.3667	0.30765	16.3668	0.8538	16.367	0.27905	16.367	0.89945	16.3667	1.1497	16.367	1.18215	16.367	0.75515
16.375	0.2164	16.375	0.30925	16.3752	0.84605	16.3753	0.278	16.3753	0.8983	16.375	1.1431	16.3753	1.17465	16.3753	0.7507
16.3833	0.21705	16.3833	0.3096	16.3835	0.83935	16.3837	0.2731	16.3837	0.90115	16.3833	1.135	16.3837	1.16975	16.3837	0.75055
16.3917	0.2137	16.3917	0.30705	16.3918	0.8318	16.392	0.26945	16.392	0.9016	16.3917	1.12525	16.392	1.16205	16.392	0.74645
16.4	0.21735	16.4	0.3096	16.4002	0.82305	16.4003	0.26665	16.4003	0.90255	16.4	1.11715	16.4003	1.1548	16.4003	0.7451
16.4083	0.2177	16.4083	0.30995	16.4085	0.8153	16.4087	0.264	16.4087	0.90345	16.4083	1.10805	16.4087	1.14775	16.4087	0.744
16.4167	0.21645	16.4167	0.31	16.4168	0.8067	16.417	0.26065	16.417	0.90365	16.4167	1.0982	16.417	1.1405	16.417	0.74185
16.425	0.2166	16.425	0.31035	16.4252	0.7998	16.4253	0.2596	16.4253	0.9081	16.425	1.09105	16.4253	1.1347	16.4253	0.742
16.4333	0.2182	16.4333	0.31015	16.4335	0.7929	16.4337	0.25735	16.4337	0.9095	16.4333	1.0842	16.4337	1.12915	16.4337	0.7407
16.4417	0.21805	16.4417	0.3116	16.4418	0.78625	16.442	0.25415	16.442	0.91235	16.4417	1.07415	16.442	1.1208	16.442	0.7404
16.45	0.21615	16.45	0.3092	16.4502	0.7817	16.4503	0.25295	16.4503	0.9141	16.45	1.06955	16.4503	1.11925	16.4503	0.7397
16.4583	0.21845	16.4583	0.31185	16.4585	0.7717	16.4587	0.24955	16.4587	0.9176	16.4583	1.05975	16.4587	1.1085	16.4587	0.74175
16.4667	0.2171	16.4667	0.3091	16.4668	0.7664	16.467	0.2479	16.467	0.9208	16.4667	1.052	16.467	1.1031	16.467	0.7417
16.475	0.21805	16.475	0.31045	16.4752	0.75895	16.4753	0.2475	16.4753	0.92395	16.475	1.04665	16.4753	1.09835	16.4753	0.7442
16.4833	0.21695	16.4833	0.3097	16.4835	0.75405	16.4837	0.2457	16.4837	0.92475	16.4833	1.0412	16.4837	1.09345	16.4837	0.7444
16.4917	0.21855	16.4917	0.31135	16.4918	0.75035	16.492	0.2437	16.492	0.9267	16.4917	1.0357	16.492	1.0874	16.492	0.74445
16.5	0.2162	16.5	0.3098	16.5002	0.7445	16.5003	0.24215	16.5003	0.93215	16.5	1.03095	16.5003	1.08315	16.5003	0.7467
16.5083	0.21685	16.5083	0.31105	16.5085	0.73935	16.5087	0.24145	16.5087	0.93525	16.5083	1.0267	16.5087	1.0797	16.5087	0.7496
16.5167	0.21665	16.5167	0.31095	16.5168	0.73525	16.517	0.2427	16.517	0.93725	16.5167	1.02315	16.517	1.07635	16.517	0.7501
16.525	0.21685	16.525	0.31105	16.5252	0.73205	16.5253	0.2407	16.5253	0.9381	16.525	1.0177	16.5253	1.0704	16.5253	0.75215
16.5333	0.2155	16.5333	0.30905	16.5335	0.72795	16.5337	0.2404	16.5337	0.9379	16.5333	1.01345	16.5337	1.0684	16.5337	0.75275
16.5417	0.21745	16.5417	0.30965	16.5418	0.72825	16.542	0.2418	16.542	0.93955	16.5417	1.01365	16.542	1.06785	16.542	0.7527
16.55	0.21485	16.55	0.3096	16.5502	0.7276	16.5503	0.2415	16.5503	0.9377	16.55	1.01165	16.5503	1.06425	16.5503	0.753
16.5583	0.21755	16.5583	0.3113	16.5585	0.7248	16.5587	0.24105	16.5587	0.9398	16.5583	1.0087	16.5587	1.06365	16.5587	0.75555
16.5667	0.2176	16.5667	0.3113	16.5668	0.725	16.567	0.24265	16.567	0.93755	16.5667	1.0089	16.567	1.06195	16.567	0.75405
16.575	0.21915	16.575	0.3134	16.5752	0.72305	16.5753	0.2432	16.5753	0.93485	16.575	1.00745	16.5753	1.0611	16.5753	0.75465
16.5833	0.21765	16.5833	0.3097	16.5835	0.7232	16.5837	0.24535	16.5837	0.93365	16.5833	1.0081	16.5837	1.06085	16.5837	0.75675
16.5917	0.21835	16.5917	0.3115	16.5918	0.72295	16.592	0.24635	16.592	0.9339	16.5917	1.00945	16.592	1.06095	16.592	0.7571
16.6	0.21905	16.6	0.31285	16.6002	0.7218	16.6003	0.2482	16.6003	0.93285	16.6	1.00735	16.6003	1.0603	16.6003	0.75
16.6083	0.22045	16.6083	0.31325	16.6085	0.72335	16.6087	0.2526	16.6087	0.9309	16.6083	1.00785	16.6087	1.0632	16.6087	0.75415
16.6167	0.221	16.6167	0.31345	16.6168	0.7262	16.617	0.2531	16.617	0.92845	16.6167	1.009	16.617	1.0651	16.617	0.75655
16.625	0.22245	16.625	0.31205	16.6252	0.72605	16.6253	0.2567	16.6253	0.92675	16.625	1.00865	16.6253	1.0637	16.6253	0.755
16.6333	0.2259	16.6333	0.31105	16.6335	0.7284	16.6337	0.25685	16.6337	0.9257	16.6333	1.0104	16.6337	1.06725	16.6337	0.75445
[truncated: 4,604 more rows]
