# Supplementary material for: A moonlighting function of a chitin polysaccharide monooxygenase, CWR-1, in Neurospora crassa allorecognition
Source: eLife. 2022 Aug 30;11:e80459. doi: 10.7554/eLife.80459 (PMC9550227; doi:10.7554/eLife.80459)
Supplement: Figure 4—source data 6. — Blank subtracted HPAEC-PAD traces. The samples were prepared as described in ‘Materials and methods.’ The time and nC response are listed in the table. [file elife-80459-fig4-data6.xlsx]

## Sheet: Sheet1
Figure 4F Source Data (Δcwr-1Δ81Δcwr-2 CW)
Δcwr-1Δ81Δcwr-2 CW		Δcwr-1Δ81Δcwr-2 CW +Asc.		HG1		HG2		HG3		HG4		HG5		HG6
time	nC	time	nC	time	nC	time	nC	time	nC	time	nC	time	nC	time	nC
0.000167	-0.01855	0.000167	-0.0076	0.000333	0.11015	0.000333	0.3191	0	0.18665	0.000333	0.365951	0.000167	0.418201	0	0.15605
0.0085	-0.03365	0.0085	-0.01725	0.008667	0.0703	0.008667	0.2762	0.008333	0.16205	0.008667	0.322401	0.0085	0.414501	0.008333	0.12005
0.016833	-0.03025	0.016833	-0.0101	0.017	0.0635	0.017	0.2696	0.016667	0.14895	0.017	0.315951	0.016833	0.397351	0.016667	0.1178
0.025167	-0.02835	0.025167	-0.00915	0.025333	0.06835	0.025333	0.27195	0.025	0.1557	0.025333	0.322151	0.025167	0.396451	0.025	0.12465
0.0335	-0.0275	0.0335	-0.00875	0.033667	0.07325	0.033667	0.27475	0.033333	0.1593	0.033667	0.324451	0.0335	0.400601	0.033333	0.1268
0.041833	-0.02805	0.041833	-0.009	0.042	0.0724	0.042	0.2733	0.041667	0.16095	0.042	0.326101	0.041833	0.404351	0.041667	0.12455
0.050167	-0.0272	0.050167	-0.0081	0.050333	0.0722	0.050333	0.27535	0.05	0.1579	0.050333	0.326901	0.050167	0.405251	0.05	0.12755
0.0585	-0.0285	0.0585	-0.00855	0.058667	0.0734	0.058667	0.27785	0.058333	0.15865	0.058667	0.327301	0.0585	0.405701	0.058333	0.1247
0.066833	-0.02805	0.066833	-0.00745	0.067	0.06625	0.067	0.277	0.066667	0.1579	0.067	0.326701	0.066833	0.405451	0.066667	0.1272
0.075167	-0.028	0.075167	-0.0084	0.075333	0.04765	0.075333	0.2765	0.075	0.15945	0.075333	0.328101	0.075167	0.406801	0.075	0.12825
0.0835	-0.02795	0.0835	-0.00915	0.083667	-0.0212	0.083667	0.27825	0.083333	0.1593	0.083667	0.329201	0.0835	0.406951	0.083333	0.12895
0.091833	-0.0289	0.091833	-0.0097	0.092	0.09255	0.092	0.2779	0.091667	0.1596	0.092	0.328251	0.091833	0.408751	0.091667	0.1295
0.100167	-0.02895	0.100167	-0.01065	0.100333	0.1175	0.100333	0.2794	0.1	0.1589	0.100333	0.328401	0.100167	0.408651	0.1	0.12835
0.1085	-0.02895	0.1085	-0.01115	0.108667	0.0559	0.108667	0.27885	0.108333	0.1591	0.108667	0.329951	0.1085	0.407651	0.108333	0.1306
0.116833	-0.02735	0.116833	-0.00795	0.117	0.0607	0.117	0.27755	0.116667	0.1607	0.117	0.330801	0.116833	0.409801	0.116667	0.12975
0.125167	-0.032	0.125167	-0.01385	0.125333	0.0656	0.125333	0.27625	0.125	0.16025	0.125333	0.327851	0.125167	0.410401	0.125	0.1326
0.1335	-0.0306	0.1335	-0.0117	0.133667	0.0646	0.133667	0.27675	0.133333	0.16305	0.133667	0.329051	0.1335	0.409801	0.133333	0.13155
0.141833	-0.0284	0.141833	-0.0099	0.142	0.0702	0.142	0.27845	0.141667	0.16075	0.142	0.330551	0.141833	0.416351	0.141667	0.13085
0.150167	-0.0292	0.150167	-0.0102	0.150333	0.07035	0.150333	0.2782	0.15	0.16135	0.150333	0.330901	0.150167	0.422101	0.15	0.1327
0.1585	-0.02925	0.1585	-0.00905	0.158667	0.0726	0.158667	0.27895	0.158333	0.1621	0.158667	0.332551	0.1585	0.413201	0.158333	0.1333
0.166833	-0.02955	0.166833	-0.0113	0.167	0.07305	0.167	0.2788	0.166667	0.16225	0.167	0.333051	0.166833	0.412151	0.166667	0.1334
0.175167	-0.0273	0.175167	-0.01015	0.175333	0.0705	0.175333	0.2802	0.175	0.16485	0.175333	0.333901	0.175167	0.412851	0.175	0.13375
0.1835	-0.02925	0.1835	-0.011	0.183667	0.06885	0.183667	0.2807	0.183333	0.16585	0.183667	0.335351	0.1835	0.416051	0.183333	0.1338
0.191833	-0.0301	0.191833	-0.0114	0.192	0.07205	0.192	0.2787	0.191667	0.1661	0.192	0.333501	0.191833	0.415851	0.191667	0.134
0.200167	-0.0317	0.200167	-0.01025	0.200333	0.0738	0.200333	0.2804	0.2	0.1641	0.200333	0.335401	0.200167	0.416701	0.2	0.1334
0.2085	-0.03175	0.2085	-0.0127	0.208667	0.0706	0.208667	0.28185	0.208333	0.16415	0.208667	0.334951	0.2085	0.418301	0.208333	0.13695
0.216833	-0.02945	0.216833	-0.01015	0.217	0.0732	0.217	0.28135	0.216667	0.16435	0.217	0.336801	0.216833	0.418851	0.216667	0.138
0.225167	-0.0299	0.225167	-0.0102	0.225333	0.07275	0.225333	0.2829	0.225	0.16555	0.225333	0.336451	0.225167	0.419451	0.225	0.13495
0.2335	-0.0291	0.2335	-0.00925	0.233667	0.0722	0.233667	0.28375	0.233333	0.16485	0.233667	0.338851	0.2335	0.418501	0.233333	0.1362
0.241833	-0.0312	0.241833	-0.0118	0.242	0.06475	0.242	0.2819	0.241667	0.16685	0.242	0.338251	0.241833	0.418651	0.241667	0.13545
0.250167	-0.0316	0.250167	-0.01165	0.250333	0.0653	0.250333	0.2823	0.25	0.1672	0.250333	0.339101	0.250167	0.419401	0.25	0.1363
0.2585	-0.0308	0.2585	-0.0096	0.258667	0.0735	0.258667	0.28405	0.258333	0.1676	0.258667	0.338001	0.2585	0.419051	0.258333	0.1373
0.266833	-0.03225	0.266833	-0.0108	0.267	0.066	0.267	0.28515	0.266667	0.16835	0.267	0.340501	0.266833	0.419851	0.266667	0.1358
0.275167	-0.0318	0.275167	-0.0093	0.275333	0.18025	0.275333	0.28275	0.275	0.16905	0.275333	0.34065	0.275167	0.422901	0.275	0.1387
0.2835	-0.03355	0.2835	-0.01165	0.283667	0.0993	0.283667	0.28375	0.283333	0.1687	0.283667	0.34025	0.2835	0.423951	0.283333	0.1374
0.291833	-0.03185	0.291833	-0.00985	0.292	0.06105	0.292	0.2844	0.291667	0.16985	0.292	0.3416	0.291833	0.419851	0.291667	0.13785
0.300167	-0.0284	0.300167	-0.00955	0.300333	0.0681	0.300333	0.2838	0.3	0.1698	0.300333	0.34275	0.300167	0.425051	0.3	0.13925
0.3085	-0.0284	0.3085	-0.011	0.308667	0.07235	0.308667	0.2838	0.308333	0.17115	0.308667	0.3429	0.3085	0.423601	0.308333	0.1377
0.316833	-0.0188	0.316833	-0.0118	0.317	0.0727	0.317	0.28595	0.316667	0.17045	0.317	0.34295	0.316833	0.411201	0.316667	0.14075
0.325167	-0.00905	0.325167	0.00475	0.325333	0.0727	0.325333	0.2855	0.325	0.17165	0.325333	0.34475	0.325167	0.399901	0.325	0.1413
0.3335	0.00585	0.3335	0.0288	0.333667	0.0723	0.333667	0.2863	0.333333	0.1724	0.333667	0.3435	0.3335	0.433101	0.333333	0.14225
0.341833	-0.28025	0.341833	-0.25885	0.342	0.07425	0.342	0.28585	0.341667	0.17065	0.342	0.3443	0.341833	0.614651	0.341667	0.14105
0.350167	-0.05095	0.350167	-0.0288	0.350333	0.07575	0.350333	0.28515	0.35	0.1681	0.350333	0.3454	0.350167	0.459201	0.35	0.1412
0.3585	-0.01235	0.3585	0.0084	0.358667	0.0755	0.358667	0.2845	0.358333	0.17355	0.358667	0.34535	0.3585	0.416951	0.358333	0.1425
0.366833	-0.0168	0.366833	0.0036	0.367	0.0751	0.367	0.28705	0.366667	0.17345	0.367	0.347	0.366833	0.422401	0.366667	0.14065
0.375167	-0.02395	0.375167	-0.00355	0.375333	0.0735	0.375333	0.28585	0.375	0.17385	0.375333	0.346	0.375167	0.426001	0.375	0.1411
0.3835	-0.02715	0.3835	-0.0058	0.383667	0.07425	0.383667	0.2852	0.383333	0.174	0.383667	0.34525	0.3835	0.425851	0.383333	0.14085
0.391833	-0.02815	0.391833	-0.0064	0.392	0.07445	0.392	0.2849	0.391667	0.17485	0.392	0.34695	0.391833	0.429401	0.391667	0.1421
0.400167	-0.02765	0.400167	-0.0048	0.400333	0.0738	0.400333	0.28435	0.4	0.17325	0.400333	0.3471	0.400167	0.430351	0.4	0.14385
0.4085	-0.02715	0.4085	-0.0073	0.408667	0.07505	0.408667	0.28525	0.408333	0.17395	0.408667	0.349	0.4085	0.431401	0.408333	0.14255
0.416833	-0.02845	0.416833	-0.00835	0.417	0.07315	0.417	0.28505	0.416667	0.1738	0.417	0.3497	0.416833	0.431151	0.416667	0.14185
0.425167	-0.02555	0.425167	-0.005	0.425333	0.0743	0.425333	0.28595	0.425	0.175	0.425333	0.3502	0.425167	0.430951	0.425	0.14115
0.4335	-0.0255	0.4335	-0.00535	0.433667	0.07245	0.433667	0.28885	0.433333	0.1757	0.433667	0.3481	0.4335	0.431051	0.433333	0.144
0.441833	-0.04155	0.441833	-0.0196	0.442	0.0725	0.442	0.2885	0.441667	0.1756	0.442	0.3479	0.441833	0.430251	0.441667	0.14535
0.450167	-0.05165	0.450167	-0.02795	0.450333	0.06985	0.450333	0.28865	0.45	0.177	0.450333	0.34935	0.450167	0.431751	0.45	0.1453
0.4585	-0.06165	0.4585	-0.03885	0.458667	0.07265	0.458667	0.28845	0.458333	0.17645	0.458667	0.35135	0.4585	0.431701	0.458333	0.14235
0.466833	-0.08425	0.466833	-0.06095	0.467	0.0741	0.467	0.2895	0.466667	0.1757	0.467	0.35085	0.466833	0.433601	0.466667	0.1445
0.475167	-0.0204	0.475167	0.00335	0.475333	0.07245	0.475333	0.2902	0.475	0.17705	0.475333	0.3507	0.475167	0.4326	0.475	0.1467
0.4835	-0.029	0.4835	-0.00515	0.483667	0.07285	0.483667	0.2887	0.483333	0.1785	0.483667	0.35285	0.4835	0.434	0.483333	0.1449
0.491833	0.03	0.491833	0.0528	0.492	0.0737	0.492	0.2912	0.491667	0.1782	0.492	0.3542	0.491833	0.43585	0.491667	0.1459
0.500167	-0.0133	0.500167	0.01085	0.500333	0.07275	0.500333	0.29005	0.5	0.17925	0.500333	0.35295	0.500167	0.4347	0.5	0.14605
0.5085	-0.0206	0.5085	0.00085	0.508667	0.0732	0.508667	0.2895	0.508333	0.18045	0.508667	0.35345	0.5085	0.43525	0.508333	0.14755
0.516833	-0.0311	0.516833	-0.00695	0.517	0.07325	0.517	0.2908	0.516667	0.1807	0.517	0.35345	0.516833	0.436	0.516667	0.1461
0.525167	-0.0327	0.525167	-0.0082	0.525333	0.07325	0.525333	0.29075	0.525	0.17815	0.525333	0.35235	0.525167	0.4363	0.525	0.14685
0.5335	-0.0333	0.5335	-0.01015	0.533667	0.0741	0.533667	0.29065	0.533333	0.17915	0.533667	0.35295	0.5335	0.43705	0.533333	0.14655
0.541833	-0.03215	0.541833	-0.00895	0.542	0.07425	0.542	0.29115	0.541667	0.17965	0.542	0.3548	0.541833	0.43845	0.541667	0.1472
0.550167	-0.03085	0.550167	-0.0047	0.550333	0.074	0.550333	0.2901	0.55	0.18085	0.550333	0.35585	0.550167	0.43995	0.55	0.1465
0.5585	-0.02395	0.5585	0.0003	0.558667	0.07185	0.558667	0.29145	0.558333	0.18045	0.558667	0.35515	0.5585	0.44085	0.558333	0.1469
0.566833	-0.01175	0.566833	0.01145	0.567	0.0728	0.567	0.2916	0.566667	0.1807	0.567	0.35575	0.566833	0.4445	0.566667	0.1476
0.575167	-0.02855	0.575167	-0.00265	0.575333	0.0745	0.575333	0.2914	0.575	0.18075	0.575333	0.3547	0.575167	0.41745	0.575	0.1499
0.5835	-0.0212	0.5835	0.0043	0.583667	0.07115	0.583667	0.2911	0.583333	0.18105	0.583667	0.3561	0.5835	0.35935	0.583333	0.15015
0.591833	-0.04345	0.591833	-0.0185	0.592	0.07275	0.592	0.29035	0.591667	0.1814	0.592	0.35585	0.591833	0.45195	0.591667	0.1508
0.600167	-0.01965	0.600167	0.00715	0.600333	0.07225	0.600333	0.293	0.6	0.18125	0.600333	0.35715	0.600167	0.4657	0.6	0.14825
0.6085	-0.02315	0.6085	0.00015	0.608667	0.07145	0.608667	0.29215	0.608333	0.1821	0.608667	0.35535	0.6085	0.41905	0.608333	0.151
0.616833	-0.02795	0.616833	-0.00285	0.617	0.06905	0.617	0.2919	0.616667	0.1834	0.617	0.3559	0.616833	0.4333	0.616667	0.14955
0.625167	-0.029	0.625167	-0.0038	0.625333	0.07035	0.625333	0.29205	0.625	0.1803	0.625333	0.35535	0.625167	0.4357	0.625	0.15035
0.6335	-0.0313	0.6335	-0.0073	0.633667	0.0704	0.633667	0.293	0.633333	0.1819	0.633667	0.35685	0.6335	0.4388	0.633333	0.1497
0.641833	-0.0334	0.641833	-0.00645	0.642	0.0717	0.642	0.29185	0.641667	0.1834	0.642	0.3581	0.641833	0.44065	0.641667	0.15085
0.650167	-0.03265	0.650167	-0.0068	0.650333	0.07	0.650333	0.2923	0.65	0.1819	0.650333	0.3578	0.650167	0.44055	0.65	0.151
0.6585	-0.0321	0.6585	-0.0049	0.658667	0.07095	0.658667	0.294	0.658333	0.18405	0.658667	0.3574	0.6585	0.4422	0.658333	0.15325
0.666833	-0.03565	0.666833	-0.0075	0.667	0.07125	0.667	0.29475	0.666667	0.1842	0.667	0.3586	0.666833	0.4435	0.666667	0.15305
0.675167	-0.0332	0.675167	-0.0063	0.675333	0.07235	0.675333	0.29385	0.675	0.18445	0.675333	0.3624	0.675167	0.44475	0.675	0.15455
0.6835	-0.03345	0.6835	-0.0052	0.683667	0.0746	0.683667	0.29615	0.683333	0.18405	0.683667	0.36285	0.6835	0.4444	0.683333	0.15325
0.691833	-0.03325	0.691833	-0.0071	0.692	0.07105	0.692	0.29395	0.691667	0.1857	0.692	0.36135	0.691833	0.4441	0.691667	0.1562
0.700167	-0.03355	0.700167	-0.0068	0.700333	0.0721	0.700333	0.29445	0.7	0.1846	0.700333	0.36235	0.700167	0.44375	0.7	0.15605
0.7085	-0.03095	0.7085	-0.0045	0.708667	0.07135	0.708667	0.2959	0.708333	0.18765	0.708667	0.3607	0.7085	0.44695	0.708333	0.15675
0.716833	0.04835	0.716833	0.0661	0.717	0.07355	0.717	0.2966	0.716667	0.1862	0.717	0.3614	0.716833	0.4469	0.716667	0.1541
0.725167	-0.01925	0.725167	0.0042	0.725333	0.07185	0.725333	0.2971	0.725	0.1852	0.725333	0.3624	0.725167	0.4466	0.725	0.15495
0.7335	0.01085	0.7335	0.036	0.733667	0.07375	0.733667	0.29695	0.733333	0.1867	0.733667	0.364	0.7335	0.44995	0.733333	0.15505
0.741833	-0.07265	0.741833	-0.0436	0.742	0.07275	0.742	0.2948	0.741667	0.18775	0.742	0.3634	0.741833	0.44765	0.741667	0.1558
0.750167	-0.05715	0.750167	-0.02835	0.750333	0.07185	0.750333	0.2965	0.75	0.18765	0.750333	0.36375	0.750167	0.44995	0.75	0.15575
0.7585	-0.0249	0.7585	0.0026	0.758667	0.0738	0.758667	0.2937	0.758333	0.1898	0.758667	0.3643	0.7585	0.44775	0.758333	0.1575
0.766833	0.04375	0.766833	0.071	0.767	0.0715	0.767	0.29595	0.766667	0.1873	0.767	0.36315	0.766833	0.4492	0.766667	0.1578
0.775167	-0.0458	0.775167	-0.01765	0.775333	0.07085	0.775333	0.2954	0.775	0.18695	0.775333	0.36365	0.775167	0.44955	0.775	0.15965
0.7835	-0.05585	0.7835	-0.03005	0.783667	0.0725	0.783667	0.2959	0.783333	0.18795	0.783667	0.3648	0.7835	0.4511	0.783333	0.15935
0.791833	-0.04875	0.791833	-0.0233	0.792	0.0721	0.792	0.29535	0.791667	0.1881	0.792	0.3664	0.791833	0.45105	0.791667	0.15995
0.800167	-0.04275	0.800167	-0.0162	0.800333	0.0716	0.800333	0.2958	0.8	0.1888	0.800333	0.366	0.800167	0.45125	0.8	0.1596
0.8085	-0.03865	0.8085	-0.01345	0.808667	0.06975	0.808667	0.29555	0.808333	0.1878	0.808667	0.3667	0.8085	0.4506	0.808333	0.15945
0.816833	-0.0351	0.816833	-0.00785	0.817	0.06995	0.817	0.29795	0.816667	0.1898	0.817	0.36495	0.816833	0.4504	0.816667	0.15785
0.825167	-0.0339	0.825167	-0.0091	0.825333	0.07115	0.825333	0.29795	0.825	0.18975	0.825333	0.36665	0.825167	0.45155	0.825	0.15735
0.8335	-0.034	0.8335	-0.00905	0.833667	0.07075	0.833667	0.2978	0.833333	0.1896	0.833667	0.3687	0.8335	0.4518	0.833333	0.1608
0.841833	-0.03445	0.841833	-0.00755	0.842	0.0704	0.842	0.2985	0.841667	0.1883	0.842	0.3665	0.841833	0.45105	0.841667	0.1622
0.850167	-0.03245	0.850167	-0.00615	0.850333	0.0724	0.850333	0.29765	0.85	0.19	0.850333	0.3685	0.850167	0.452	0.85	0.162
0.8585	-0.03305	0.8585	-0.0091	0.858667	0.0695	0.858667	0.2982	0.858333	0.1915	0.858667	0.367	0.8585	0.45175	0.858333	0.1637
0.866833	-0.0344	0.866833	-0.00655	0.867	0.0714	0.867	0.2983	0.866667	0.1919	0.867	0.36835	0.866833	0.45535	0.866667	0.16165
0.875167	-0.0341	0.875167	-0.00895	0.875333	0.07155	0.875333	0.29825	0.875	0.1926	0.875333	0.36685	0.875167	0.4519	0.875	0.16325
0.8835	-0.0332	0.8835	-0.0079	0.883667	0.0721	0.883667	0.2974	0.883333	0.19275	0.883667	0.3679	0.8835	0.4528	0.883333	0.1644
0.891833	-0.034	0.891833	-0.0072	0.892	0.0733	0.892	0.29905	0.891667	0.1936	0.892	0.36645	0.891833	0.45425	0.891667	0.165
0.900167	-0.0319	0.900167	-0.0059	0.900333	0.0724	0.900333	0.29895	0.9	0.19355	0.900333	0.36865	0.900167	0.4553	0.9	0.1659
0.9085	-0.03155	0.9085	-0.00415	0.908667	0.0727	0.908667	0.2975	0.908333	0.193	0.908667	0.36875	0.9085	0.45705	0.908333	0.1646
0.916833	-0.0333	0.916833	-0.00685	0.917	0.0732	0.917	0.2958	0.916667	0.19315	0.917	0.36915	0.916833	0.4565	0.916667	0.1668
0.925167	-0.033	0.925167	-0.0078	0.925333	0.0732	0.925333	0.29835	0.925	0.193	0.925333	0.36895	0.925167	0.45735	0.925	0.16695
0.9335	-0.03245	0.9335	-0.00935	0.933667	0.0718	0.933667	0.29845	0.933333	0.19405	0.933667	0.3711	0.9335	0.45815	0.933333	0.16505
0.941833	-0.03215	0.941833	-0.0063	0.942	0.07385	0.942	0.29745	0.941667	0.1948	0.942	0.372	0.941833	0.4565	0.941667	0.1663
0.950167	-0.03095	0.950167	-0.0071	0.950333	0.0741	0.950333	0.29765	0.95	0.19305	0.950333	0.37215	0.950167	0.4574	0.95	0.1661
0.9585	-0.03175	0.9585	-0.0066	0.958667	0.07125	0.958667	0.2976	0.958333	0.19545	0.958667	0.37185	0.9585	0.45865	0.958333	0.1659
0.966833	-0.03155	0.966833	-0.0085	0.967	0.0727	0.967	0.2973	0.966667	0.1948	0.967	0.3711	0.966833	0.4584	0.966667	0.16845
0.975167	-0.03175	0.975167	-0.0067	0.975333	0.07375	0.975333	0.2975	0.975	0.19405	0.975333	0.37175	0.975167	0.4582	0.975	0.16695
0.9835	-0.03245	0.9835	-0.0079	0.983667	0.07345	0.983667	0.29685	0.983333	0.1939	0.983667	0.37305	0.9835	0.4578	0.983333	0.1669
0.991833	-0.03025	0.991833	-0.00545	0.992	0.0701	0.992	0.2979	0.991667	0.19415	0.992	0.3711	0.991833	0.45745	0.991667	0.16625
1.00017	-0.0319	1.00017	-0.0062	1.00033	0.07135	1.00033	0.2974	1	0.19405	1.00033	0.37275	1.00017	0.4579	1	0.16845
1.0085	-0.03045	1.0085	-0.0063	1.00867	0.0735	1.00867	0.29855	1.00833	0.19535	1.00867	0.3752	1.0085	0.4605	1.00833	0.16805
1.01683	-0.0318	1.01683	-0.00865	1.017	0.07135	1.017	0.29875	1.01667	0.1968	1.017	0.37255	1.01683	0.4595	1.01667	0.17005
1.02517	-0.0313	1.02517	-0.0072	1.02533	0.07085	1.02533	0.298	1.025	0.19585	1.02533	0.3735	1.02517	0.4579	1.025	0.1677
1.0335	-0.03105	1.0335	-0.00835	1.03367	0.0704	1.03367	0.2997	1.03333	0.19735	1.03367	0.3719	1.0335	0.4611	1.03333	0.17025
1.04183	-0.0321	1.04183	-0.00745	1.042	0.07195	1.042	0.29865	1.04167	0.1974	1.042	0.3751	1.04183	0.4698	1.04167	0.1695
1.05017	-0.03225	1.05017	-0.0077	1.05033	0.07255	1.05033	0.2985	1.05	0.1965	1.05033	0.3745	1.05017	0.45695	1.05	0.1681
1.0585	-0.0327	1.0585	-0.00905	1.05867	0.073	1.05867	0.3012	1.05833	0.198	1.05867	0.37335	1.0585	0.46075	1.05833	0.1681
1.06683	-0.03045	1.06683	-0.00735	1.067	0.0716	1.067	0.30015	1.06667	0.1979	1.067	0.3729	1.06683	0.45895	1.06667	0.16935
1.07517	-0.0314	1.07517	-0.007	1.07533	0.0716	1.07533	0.30075	1.075	0.1981	1.07533	0.37405	1.07517	0.46015	1.075	0.1684
1.0835	-0.0309	1.0835	-0.0079	1.08367	0.07205	1.08367	0.3002	1.08333	0.198	1.08367	0.37365	1.0835	0.46	1.08333	0.1703
1.09183	-0.03195	1.09183	-0.0073	1.092	0.0715	1.092	0.2995	1.09167	0.2004	1.092	0.3714	1.09183	0.45935	1.09167	0.1704
1.10017	-0.03075	1.10017	-0.0063	1.10033	0.0728	1.10033	0.29995	1.1	0.19765	1.10033	0.37305	1.10017	0.4613	1.1	0.17025
1.1085	-0.03095	1.1085	-0.0056	1.10867	0.07245	1.10867	0.29785	1.10833	0.2	1.10867	0.37265	1.1085	0.46095	1.10833	0.16985
1.11683	-0.0318	1.11683	-0.00745	1.117	0.0709	1.117	0.2995	1.11667	0.1999	1.117	0.3731	1.11683	0.4607	1.11667	0.1714
1.12517	-0.0294	1.12517	-0.00545	1.12533	0.0721	1.12533	0.2977	1.125	0.1999	1.12533	0.37375	1.12517	0.46155	1.125	0.16845
1.1335	-0.03015	1.1335	-0.0077	1.13367	0.0729	1.13367	0.2969	1.13333	0.19945	1.13367	0.37355	1.1335	0.45925	1.13333	0.1707
1.14183	-0.0295	1.14183	-0.00545	1.142	0.0726	1.142	0.29655	1.14167	0.19945	1.142	0.3738	1.14183	0.461	1.14167	0.16995
1.15017	-0.02995	1.15017	-0.007	1.15033	0.0702	1.15033	0.29685	1.15	0.20005	1.15033	0.37295	1.15017	0.4607	1.15	0.1732
1.1585	-0.0314	1.1585	-0.0074	1.15867	0.0728	1.15867	0.3	1.15833	0.19945	1.15867	0.3758	1.1585	0.4626	1.15833	0.1714
1.16683	-0.03125	1.16683	-0.0067	1.167	0.072	1.167	0.29765	1.16667	0.2002	1.167	0.375	1.16683	0.46095	1.16667	0.1712
1.17517	-0.02965	1.17517	-0.00695	1.17533	0.0712	1.17533	0.299	1.175	0.20065	1.17533	0.37545	1.17517	0.46235	1.175	0.1714
1.1835	-0.03	1.1835	-0.0067	1.18367	0.0714	1.18367	0.29665	1.18333	0.19925	1.18367	0.3759	1.1835	0.4621	1.18333	0.1747
1.19183	-0.031	1.19183	-0.0063	1.192	0.0736	1.192	0.29805	1.19167	0.1995	1.192	0.3768	1.19183	0.4633	1.19167	0.1753
1.20017	-0.0321	1.20017	-0.0071	1.20033	0.0733	1.20033	0.29845	1.2	0.2024	1.20033	0.3759	1.20017	0.46325	1.2	0.17475
1.2085	-0.0317	1.2085	-0.0079	1.20867	0.07385	1.20867	0.2973	1.20833	0.198	1.20867	0.3754	1.2085	0.4627	1.20833	0.1761
1.21683	-0.03105	1.21683	-0.00995	1.217	0.0717	1.217	0.29835	1.21667	0.1999	1.217	0.36595	1.21683	0.4619	1.21667	0.1773
1.22517	-0.0296	1.22517	-0.0085	1.22533	0.07085	1.22533	0.2993	1.225	0.20115	1.22533	0.311	1.22517	0.46175	1.225	0.1757
1.2335	-0.0282	1.2335	-0.00785	1.23367	0.07245	1.23367	0.29835	1.23333	0.1999	1.23367	0.3614	1.2335	0.4633	1.23333	0.1791
1.24183	-0.02855	1.24183	-0.0072	1.242	0.0739	1.242	0.2976	1.24167	0.2009	1.242	0.4054	1.24183	0.46455	1.24167	0.1784
1.25017	-0.031	1.25017	-0.0099	1.25033	0.072	1.25033	0.2973	1.25	0.20225	1.25033	0.3748	1.25017	0.4624	1.25	0.1785
1.2585	-0.0313	1.2585	-0.01035	1.25867	0.071	1.25867	0.2992	1.25833	0.2024	1.25867	0.36745	1.2585	0.4632	1.25833	0.17575
1.26683	-0.0288	1.26683	-0.00975	1.267	0.0715	1.267	0.29735	1.26667	0.2035	1.267	0.43	1.26683	0.46165	1.26667	0.17815
1.27517	-0.0324	1.27517	-0.01185	1.27533	0.07045	1.27533	0.2979	1.275	0.20275	1.27533	0.43305	1.27517	0.46225	1.275	0.17835
1.2835	-0.02995	1.2835	-0.0103	1.28367	0.07205	1.28367	0.29595	1.28333	0.20225	1.28367	0.3612	1.2835	0.46795	1.28333	0.1774
1.29183	-0.0305	1.29183	-0.01165	1.292	0.0687	1.292	0.2943	1.29167	0.20045	1.292	0.3598	1.29183	0.46185	1.29167	0.1792
1.30017	-0.0307	1.30017	-0.0111	1.30033	0.07155	1.30033	0.29605	1.3	0.2013	1.30033	0.3754	1.30017	0.4707	1.3	0.1766
1.3085	-0.0301	1.3085	-0.01125	1.30867	0.07125	1.30867	0.29435	1.30833	0.20285	1.30867	0.37315	1.3085	0.4647	1.30833	0.1768
1.31683	-0.03025	1.31683	-0.00965	1.317	0.07615	1.317	0.2943	1.31667	0.2007	1.317	0.37405	1.31683	0.465	1.31667	0.17865
1.32517	-0.03015	1.32517	-0.00975	1.32533	0.072	1.32533	0.2954	1.325	0.2027	1.32533	0.3766	1.32517	0.4662	1.325	0.1797
1.3335	-0.02915	1.3335	-0.0087	1.33367	0.0735	1.33367	0.29425	1.33333	0.20055	1.33367	0.37495	1.3335	0.4657	1.33333	0.17935
1.34183	-0.03155	1.34183	-0.01165	1.342	0.0759	1.342	0.29385	1.34167	0.2018	1.342	0.37805	1.34183	0.46615	1.34167	0.1783
1.35017	-0.0321	1.35017	-0.0128	1.35033	0.0691	1.35033	0.2929	1.35	0.2006	1.35033	0.376	1.35017	0.4666	1.35	0.17915
1.3585	-0.03275	1.3585	-0.01115	1.35867	0.07115	1.35867	0.29475	1.35833	0.20155	1.35867	0.37715	1.3585	0.4673	1.35833	0.18
1.36683	-0.0321	1.36683	-0.0131	1.367	0.0726	1.367	0.29575	1.36667	0.20215	1.367	0.3764	1.36683	0.4666	1.36667	0.1802
1.37517	-0.03175	1.37517	-0.0125	1.37533	0.0721	1.37533	0.2951	1.375	0.2016	1.37533	0.37755	1.37517	0.4663	1.375	0.17995
1.3835	-0.03275	1.3835	-0.01365	1.38367	0.0676	1.38367	0.2933	1.38333	0.2022	1.38367	0.3754	1.3835	0.46575	1.38333	0.1803
1.39183	-0.03095	1.39183	-0.0123	1.392	0.0687	1.392	0.29405	1.39167	0.2026	1.392	0.3783	1.39183	0.46625	1.39167	0.18185
1.40017	-0.03395	1.40017	-0.01365	1.40033	0.0746	1.40033	0.2949	1.4	0.20265	1.40033	0.3789	1.40017	0.46505	1.4	0.182
1.4085	-0.0345	1.4085	-0.01325	1.40867	0.0646	1.40867	0.29535	1.40833	0.20125	1.40867	0.37675	1.4085	0.46605	1.40833	0.18075
1.41683	-0.0354	1.41683	-0.0122	1.417	0.07635	1.417	0.2927	1.41667	0.1998	1.417	0.37675	1.41683	0.4656	1.41667	0.1819
1.42517	-0.03475	1.42517	-0.0158	1.42533	0.083	1.42533	0.2936	1.425	0.2013	1.42533	0.3774	1.42517	0.467	1.425	0.18155
1.4335	-0.03285	1.4335	-0.0129	1.43367	0.0748	1.43367	0.29435	1.43333	0.20125	1.43367	0.3764	1.4335	0.46575	1.43333	0.1814
1.44183	-0.0334	1.44183	-0.01245	1.442	0.07155	1.442	0.2943	1.44167	0.20145	1.442	0.37615	1.44183	0.46425	1.44167	0.18075
1.45017	-0.0329	1.45017	-0.01205	1.45033	0.0724	1.45033	0.29415	1.45	0.20285	1.45033	0.37795	1.45017	0.46445	1.45	0.1811
1.4585	-0.0331	1.4585	-0.01245	1.45867	0.0721	1.45867	0.2928	1.45833	0.20105	1.45867	0.376	1.4585	0.46565	1.45833	0.1798
1.46683	-0.03335	1.46683	-0.0116	1.467	0.07185	1.467	0.2949	1.46667	0.2023	1.467	0.377	1.46683	0.46535	1.46667	0.1794
1.47517	-0.0335	1.47517	-0.01325	1.47533	0.0709	1.47533	0.2914	1.475	0.19875	1.47533	0.3766	1.47517	0.4654	1.475	0.1807
1.4835	-0.03265	1.4835	-0.0132	1.48367	0.0723	1.48367	0.2928	1.48333	0.19975	1.48367	0.3787	1.4835	0.4663	1.48333	0.18055
1.49183	-0.031	1.49183	-0.0125	1.492	0.07085	1.492	0.29025	1.49167	0.1996	1.492	0.37805	1.49183	0.4667	1.49167	0.1802
1.50017	-0.03515	1.50017	-0.01385	1.50033	0.07185	1.50033	0.2919	1.5	0.1991	1.50033	0.37765	1.50017	0.4668	1.5	0.18145
1.5085	-0.03275	1.5085	-0.0141	1.50867	0.0758	1.50867	0.2903	1.50833	0.199	1.50867	0.37865	1.5085	0.4666	1.50833	0.18085
1.51683	-0.03305	1.51683	-0.0131	1.517	0.0729	1.517	0.2905	1.51667	0.1991	1.517	0.3775	1.51683	0.46675	1.51667	0.18145
1.52517	-0.0315	1.52517	-0.01345	1.52533	0.07265	1.52533	0.28975	1.525	0.19665	1.52533	0.37745	1.52517	0.46655	1.525	0.1829
1.5335	-0.03265	1.5335	-0.0119	1.53367	0.07055	1.53367	0.29005	1.53333	0.19785	1.53367	0.37665	1.5335	0.4643	1.53333	0.18085
1.54183	-0.0318	1.54183	-0.01035	1.542	0.07125	1.542	0.2901	1.54167	0.1976	1.542	0.3755	1.54183	0.4636	1.54167	0.18215
1.55017	-0.03075	1.55017	-0.0113	1.55033	0.0715	1.55033	0.2899	1.55	0.1984	1.55033	0.3775	1.55017	0.4663	1.55	0.1825
1.5585	-0.03245	1.5585	-0.00895	1.55867	0.0711	1.55867	0.2886	1.55833	0.1979	1.55867	0.3776	1.5585	0.46395	1.55833	0.1832
1.56683	-0.03275	1.56683	-0.0107	1.567	0.0703	1.567	0.29045	1.56667	0.1981	1.567	0.37725	1.56683	0.4641	1.56667	0.1818
1.57517	-0.03295	1.57517	-0.0121	1.57533	0.0713	1.57533	0.2908	1.575	0.1994	1.57533	0.3771	1.57517	0.4644	1.575	0.1827
1.5835	-0.0333	1.5835	-0.0113	1.58367	0.0715	1.58367	0.2915	1.58333	0.1978	1.58367	0.37655	1.5835	0.46425	1.58333	0.18235
1.59183	-0.03405	1.59183	-0.01265	1.592	0.0689	1.592	0.29155	1.59167	0.19735	1.592	0.3746	1.59183	0.46215	1.59167	0.1832
1.60017	-0.0337	1.60017	-0.0117	1.60033	0.0713	1.60033	0.2906	1.6	0.19605	1.60033	0.3752	1.60017	0.4633	1.6	0.18215
1.6085	-0.03295	1.6085	-0.01115	1.60867	0.06855	1.60867	0.2884	1.60833	0.1982	1.60867	0.3729	1.6085	0.46185	1.60833	0.1849
1.61683	-0.03285	1.61683	-0.0089	1.617	0.06895	1.617	0.28975	1.61667	0.19705	1.617	0.37575	1.61683	0.46185	1.61667	0.1803
1.62517	-0.0366	1.62517	-0.01255	1.62533	0.068	1.62533	0.28835	1.625	0.19805	1.62533	0.3755	1.62517	0.4617	1.625	0.18415
1.6335	-0.0376	1.6335	-0.01305	1.63367	0.0692	1.63367	0.28775	1.63333	0.1995	1.63367	0.37505	1.6335	0.46155	1.63333	0.18155
1.64183	-0.03275	1.64183	-0.0113	1.642	0.0696	1.642	0.2862	1.64167	0.19965	1.642	0.37665	1.64183	0.4617	1.64167	0.18325
1.65017	-0.0344	1.65017	-0.01275	1.65033	0.0695	1.65033	0.28835	1.65	0.1995	1.65033	0.374	1.65017	0.4616	1.65	0.1836
1.6585	-0.0347	1.6585	-0.01235	1.65867	0.0704	1.65867	0.28765	1.65833	0.19875	1.65867	0.37515	1.6585	0.46175	1.65833	0.18595
1.66683	-0.0312	1.66683	-0.0105	1.667	0.0716	1.667	0.29105	1.66667	0.1985	1.667	0.37575	1.66683	0.4633	1.66667	0.1844
1.67517	-0.0341	1.67517	-0.00875	1.67533	0.07155	1.67533	0.2905	1.675	0.1998	1.67533	0.3757	1.67517	0.4638	1.675	0.1821
1.6835	-0.0346	1.6835	-0.00905	1.68367	0.0697	1.68367	0.2897	1.68333	0.20095	1.68367	0.3748	1.6835	0.46305	1.68333	0.18255
1.69183	-0.0327	1.69183	-0.00885	1.692	0.07135	1.692	0.28815	1.69167	0.1995	1.692	0.3763	1.69183	0.46235	1.69167	0.18205
1.70017	-0.03235	1.70017	-0.0093	1.70033	0.06895	1.70033	0.2882	1.7	0.20035	1.70033	0.37335	1.70017	0.4604	1.7	0.1822
1.7085	-0.03285	1.7085	-0.0103	1.70867	0.06995	1.70867	0.2862	1.70833	0.2007	1.70867	0.3749	1.7085	0.4641	1.70833	0.18295
1.71683	-0.03165	1.71683	-0.00975	1.717	0.0685	1.717	0.2881	1.71667	0.1997	1.717	0.37325	1.71683	0.4602	1.71667	0.18265
1.72517	-0.0329	1.72517	-0.00985	1.72533	0.069	1.72533	0.2874	1.725	0.19865	1.72533	0.37285	1.72517	0.4594	1.725	0.18225
1.7335	-0.03195	1.7335	-0.0095	1.73367	0.06925	1.73367	0.28665	1.73333	0.19905	1.73367	0.37425	1.7335	0.46065	1.73333	0.18175
1.74183	-0.0315	1.74183	-0.00775	1.742	0.0687	1.742	0.286	1.74167	0.19945	1.742	0.37405	1.74183	0.46	1.74167	0.18205
1.75017	-0.0322	1.75017	-0.0089	1.75033	0.0679	1.75033	0.2866	1.75	0.19955	1.75033	0.3737	1.75017	0.45905	1.75	0.18355
1.7585	-0.03555	1.7585	-0.01115	1.75867	0.06955	1.75867	0.2853	1.75833	0.1984	1.75867	0.37495	1.7585	0.4591	1.75833	0.183
1.76683	-0.0347	1.76683	-0.01015	1.767	0.0679	1.767	0.2854	1.76667	0.20025	1.767	0.3725	1.76683	0.45855	1.76667	0.18525
1.77517	-0.03375	1.77517	-0.00895	1.77533	0.06775	1.77533	0.2831	1.775	0.19995	1.77533	0.37425	1.77517	0.4587	1.775	0.1835
1.7835	-0.032	1.7835	-0.00685	1.78367	0.0683	1.78367	0.28525	1.78333	0.19795	1.78367	0.37165	1.7835	0.45775	1.78333	0.18525
1.79183	-0.03375	1.79183	-0.0097	1.792	0.0681	1.792	0.2831	1.79167	0.19905	1.792	0.37355	1.79183	0.45735	1.79167	0.1846
1.80017	-0.03415	1.80017	-0.01255	1.80033	0.0687	1.80033	0.28325	1.8	0.2007	1.80033	0.37265	1.80017	0.45875	1.8	0.18655
1.8085	-0.03475	1.8085	-0.01165	1.80867	0.069	1.80867	0.2855	1.80833	0.2005	1.80867	0.3728	1.8085	0.45795	1.80833	0.18475
1.81683	-0.03305	1.81683	-0.0126	1.817	0.06805	1.817	0.28255	1.81667	0.20225	1.817	0.37225	1.81683	0.45455	1.81667	0.1859
1.82517	-0.03385	1.82517	-0.01275	1.82533	0.06845	1.82533	0.2823	1.825	0.20205	1.82533	0.3742	1.82517	0.4571	1.825	0.18415
1.8335	-0.0348	1.8335	-0.01285	1.83367	0.0657	1.83367	0.2807	1.83333	0.202	1.83367	0.3724	1.8335	0.4571	1.83333	0.18515
1.84183	-0.0314	1.84183	-0.0095	1.842	0.0685	1.842	0.28215	1.84167	0.2012	1.842	0.37135	1.84183	0.4578	1.84167	0.1855
1.85017	-0.0333	1.85017	-0.01265	1.85033	0.06905	1.85033	0.2788	1.85	0.2018	1.85033	0.3721	1.85017	0.4568	1.85	0.1855
1.8585	-0.0339	1.8585	-0.01125	1.85867	0.0685	1.85867	0.2805	1.85833	0.20275	1.85867	0.3717	1.8585	0.45715	1.85833	0.1831
1.86683	-0.0338	1.86683	-0.0121	1.867	0.06925	1.867	0.27875	1.86667	0.20255	1.867	0.37355	1.86683	0.45835	1.86667	0.18345
1.87517	-0.03615	1.87517	-0.0131	1.87533	0.0684	1.87533	0.27915	1.875	0.20335	1.87533	0.3699	1.87517	0.45705	1.875	0.1845
1.8835	-0.03295	1.8835	-0.0123	1.88367	0.06985	1.88367	0.2766	1.88333	0.2034	1.88367	0.37225	1.8835	0.45685	1.88333	0.18455
1.89183	-0.0326	1.89183	-0.0113	1.892	0.06915	1.892	0.27745	1.89167	0.2027	1.892	0.37085	1.89183	0.45685	1.89167	0.18325
1.90017	-0.03495	1.90017	-0.0122	1.90033	0.0677	1.90033	0.2763	1.9	0.20375	1.90033	0.37	1.90017	0.4561	1.9	0.1845
1.9085	-0.03545	1.9085	-0.0133	1.90867	0.06995	1.90867	0.2782	1.90833	0.2007	1.90867	0.37025	1.9085	0.4551	1.90833	0.18245
1.91683	-0.0355	1.91683	-0.01485	1.917	0.0694	1.917	0.27645	1.91667	0.20135	1.917	0.371	1.91683	0.45375	1.91667	0.1814
1.92517	-0.03785	1.92517	-0.0163	1.92533	0.06815	1.92533	0.27725	1.925	0.2017	1.92533	0.37165	1.92517	0.4561	1.925	0.18305
1.9335	-0.0347	1.9335	-0.01475	1.93367	0.0685	1.93367	0.27495	1.93333	0.2037	1.93367	0.37045	1.9335	0.4536	1.93333	0.1843
1.94183	-0.0351	1.94183	-0.01625	1.942	0.06785	1.942	0.2761	1.94167	0.20275	1.942	0.37045	1.94183	0.45275	1.94167	0.1816
1.95017	-0.03695	1.95017	-0.0172	1.95033	0.0671	1.95033	0.27585	1.95	0.20485	1.95033	0.3716	1.95017	0.4557	1.95	0.18445
1.9585	-0.03775	1.9585	-0.01715	1.95867	0.06785	1.95867	0.2744	1.95833	0.20375	1.95867	0.3716	1.9585	0.454	1.95833	0.1825
1.96683	-0.03845	1.96683	-0.01695	1.967	0.06755	1.967	0.2765	1.96667	0.20425	1.967	0.36865	1.96683	0.4526	1.96667	0.18335
1.97517	-0.0355	1.97517	-0.01505	1.97533	0.06835	1.97533	0.2746	1.975	0.205	1.97533	0.37045	1.97517	0.4526	1.975	0.1839
1.9835	-0.0373	1.9835	-0.017	1.98367	0.06705	1.98367	0.27705	1.98333	0.2058	1.98367	0.36865	1.9835	0.45035	1.98333	0.18445
1.99183	-0.0374	1.99183	-0.017	1.992	0.06835	1.992	0.27535	1.99167	0.2064	1.992	0.36925	1.99183	0.4506	1.99167	0.18325
2.00017	-0.0374	2.00017	-0.01755	2.00033	0.0671	2.00033	0.27645	2	0.2052	2.00033	0.36765	2.00017	0.45055	2	0.1837
2.0085	-0.03885	2.0085	-0.0203	2.00867	0.0678	2.00867	0.27435	2.00833	0.20615	2.00867	0.3702	2.0085	0.45235	2.00833	0.18385
2.01683	-0.03885	2.01683	-0.0196	2.017	0.06805	2.017	0.2709	2.01667	0.20505	2.017	0.3694	2.01683	0.45155	2.01667	0.18285
2.02517	-0.03875	2.02517	-0.0197	2.02533	0.0682	2.02533	0.2718	2.025	0.2064	2.02533	0.36955	2.02517	0.4517	2.025	0.18395
2.0335	-0.03785	2.0335	-0.01945	2.03367	0.06775	2.03367	0.27285	2.03333	0.20585	2.03367	0.3692	2.0335	0.45155	2.03333	0.18265
2.04183	-0.0392	2.04183	-0.01935	2.042	0.06825	2.042	0.27075	2.04167	0.20455	2.042	0.3687	2.04183	0.45165	2.04167	0.18245
2.05017	-0.0372	2.05017	-0.01995	2.05033	0.06955	2.05033	0.27205	2.05	0.20465	2.05033	0.3678	2.05017	0.45205	2.05	0.18065
2.0585	-0.0366	2.0585	-0.0188	2.05867	0.06895	2.05867	0.27165	2.05833	0.20495	2.05867	0.36995	2.0585	0.4554	2.05833	0.1809
2.06683	-0.03785	2.06683	-0.0201	2.067	0.06835	2.067	0.2701	2.06667	0.1984	2.067	0.3668	2.06683	0.4511	2.06667	0.181
2.07517	-0.04065	2.07517	-0.0228	2.07533	0.0618	2.07533	0.2689	2.075	0.1813	2.07533	0.36275	2.07517	0.4489	2.075	0.17435
2.0835	-0.04985	2.0835	-0.02985	2.08367	0.038	2.08367	0.2501	2.08333	0.14185	2.08367	0.34165	2.0835	0.4375	2.08333	0.1547
2.09183	-0.0659	2.09183	-0.04425	2.092	-0.0182	2.092	0.20995	2.09167	0.07615	2.092	0.29305	2.09183	0.3959	2.09167	0.1086
2.10017	-0.0818	2.10017	-0.0593	2.10033	-0.1112	2.10033	0.12775	2.1	-0.0004	2.10033	0.2014	2.10017	0.30165	2.1	0.04435
2.1085	-0.08615	2.1085	-0.06195	2.10867	-0.22275	2.10867	0.0269	2.10833	-0.05995	2.10867	0.09375	2.1085	0.16625	2.10833	-0.02255
2.11683	-0.0662	2.11683	-0.04515	2.117	-0.3136	2.117	-0.06245	2.11667	-0.05975	2.117	0.0046	2.11683	0.02065	2.11667	-0.0544
2.12517	-0.0194	2.12517	-0.00255	2.12533	-0.3612	2.12533	-0.09515	2.125	0.0375	2.12533	-0.0404	2.12517	-0.07545	2.125	-0.0372
2.1335	0.046	2.1335	0.05785	2.13367	-0.34595	2.13367	-0.0361	2.13333	0.25785	2.13367	-0.02075	2.1335	-0.08995	2.13333	0.03755
2.14183	0.13225	2.14183	0.1463	2.142	-0.2611	2.142	0.1097	2.14167	0.607	2.142	0.06385	2.14183	0.00195	2.14167	0.1642
2.15017	0.21925	2.15017	0.24935	2.15033	-0.12025	2.15033	0.30185	2.15	1.0735	2.15033	0.20075	2.15017	0.17685	2.15	0.3297
2.1585	0.333	2.1585	0.3856	2.15867	0.0898	2.15867	0.53315	2.15833	1.6373	2.15867	0.38935	2.1585	0.40495	2.15833	0.53925
2.16683	0.4836	2.16683	0.55195	2.167	0.3957	2.167	0.82375	2.16667	2.2565	2.167	0.65815	2.16683	0.6621	2.16667	0.828
2.17517	0.68545	2.17517	0.74675	2.17533	0.84945	2.17533	1.2921	2.175	2.89535	2.17533	1.05135	2.17517	0.9716	2.175	1.25875
2.1835	0.9283	2.1835	0.9674	2.18367	1.55425	2.18367	2.3918	2.18333	3.5386	2.18367	1.6617	2.1835	1.3736	2.18333	2.0465
2.19183	1.2035	2.19183	1.20455	2.192	2.8089	2.192	5.56505	2.19167	4.24025	2.192	2.73245	2.19183	1.9139	2.19167	3.72425
2.20017	1.50715	2.20017	1.45235	2.20033	5.17785	2.20033	13.5749	2.2	5.12945	2.20033	4.75775	2.20017	2.66575	2.2	7.23705
2.2085	1.8422	2.2085	1.7191	2.20867	9.3274	2.20867	29.3442	2.20833	6.36015	2.20867	8.3477	2.2085	3.74195	2.20833	13.5371
2.21683	2.20905	2.21683	1.99695	2.217	15.567	2.217	53.3034	2.21667	8.02635	2.217	13.8597	2.21683	5.26535	2.21667	22.8794
2.22517	2.60115	2.22517	2.2826	2.22533	23.4926	2.22533	81.6825	2.225	10.0737	2.22533	21.0026	2.22517	7.23905	2.225	34.3488
2.2335	2.9813	2.2335	2.55415	2.23367	31.9953	2.23367	108.076	2.23333	12.295	2.23367	28.8197	2.2335	9.51225	2.23333	46.1998
2.24183	3.31525	2.24183	2.79165	2.242	39.7647	2.242	127.528	2.24167	14.4003	2.242	36.0893	2.24183	11.7958	2.24167	56.5836
2.25017	3.55755	2.25017	2.96855	2.25033	45.7691	2.25033	139.41	2.25	16.1178	2.25033	41.7988	2.25017	13.7783	2.25	64.2359
2.2585	3.6887	2.2585	3.0754	2.25867	49.4903	2.25867	143.427	2.25833	17.2846	2.25867	45.4239	2.2585	15.2299	2.25833	68.674
2.26683	3.706	2.26683	3.1118	2.267	50.9267	2.267	141.599	2.26667	17.8566	2.267	46.9042	2.26683	16.0335	2.26667	70.0529
2.27517	3.6264	2.27517	3.0854	2.27533	50.3929	2.27533	135.892	2.275	17.8878	2.27533	46.5179	2.27517	16.2009	2.275	68.8844
2.2835	3.473	2.2835	3.00485	2.28367	48.3536	2.28367	127.729	2.28333	17.4907	2.28367	44.691	2.2835	15.8316	2.28333	65.8354
2.29183	3.27625	2.29183	2.89295	2.292	45.3041	2.292	118.137	2.29167	16.7914	2.292	41.8818	2.29183	15.0726	2.29167	61.5429
2.30017	3.0553	2.30017	2.76395	2.30033	41.6585	2.30033	107.851	2.3	15.9115	2.30033	38.5032	2.30017	14.0671	2.3	56.5425
2.3085	2.8331	2.3085	2.62555	2.30867	37.7533	2.30867	97.4163	2.30833	14.9457	2.30867	34.8771	2.3085	12.9459	2.30833	51.2439
2.31683	2.6199	2.31683	2.48975	2.317	33.8312	2.317	87.2391	2.31667	13.9635	2.317	31.2479	2.31683	11.8036	2.31667	45.9499
2.32517	2.4238	2.32517	2.3614	2.32533	30.0651	2.32533	77.6001	2.325	13.0191	2.32533	27.7883	2.32517	10.705	2.325	40.8722
2.3335	2.25175	2.3335	2.24165	2.33367	26.5722	2.33367	68.6986	2.33333	12.1394	2.33367	24.5861	2.3335	9.6919	2.33333	36.1421
2.34183	2.1039	2.34183	2.13555	2.342	23.4106	2.342	60.6338	2.34167	11.3424	2.342	21.707	2.34183	8.7842	2.34167	31.8387
2.35017	1.9744	2.35017	2.04015	2.35033	20.6067	2.35033	53.4521	2.35	10.6392	2.35033	19.1646	2.35017	7.9908	2.35	28.0024
2.3585	1.8679	2.3585	1.9595	2.35867	18.1594	2.35867	47.1442	2.35833	10.0275	2.35867	16.9644	2.3585	7.3101	2.35833	24.6318
2.36683	1.7799	2.36683	1.88845	2.367	16.0524	2.367	41.679	2.36667	9.5001	2.367	15.0801	2.36683	6.7366	2.36667	21.7091
2.37517	1.70545	2.37517	1.8255	2.37533	14.2576	2.37533	36.9669	2.375	9.05055	2.37533	13.4832	2.37517	6.2584	2.375	19.2044
2.3835	1.6461	2.3835	1.77415	2.38367	12.7356	2.38367	32.9361	2.38333	8.67515	2.38367	12.1406	2.3835	5.86405	2.38333	17.069
2.39183	1.5967	2.39183	1.73075	2.392	11.4536	2.392	29.4921	2.39167	8.35555	2.392	11.0131	2.39183	5.5374	2.39167	15.2571
2.40017	1.55245	2.40017	1.6908	2.40033	10.3714	2.40033	26.5347	2.4	8.087	2.40033	10.0652	2.40017	5.2679	2.4	13.7232
2.4085	1.5144	2.4085	1.654	2.40867	9.4512	2.40867	23.5194	2.40833	7.8633	2.40867	9.26025	2.4085	5.03715	2.40833	12.422
2.41683	1.476	2.41683	1.6193	2.417	8.66635	2.417	21.101	2.41667	7.67795	2.417	8.5719	2.41683	4.83825	2.41667	11.3157
2.42517	1.44325	2.42517	1.5877	2.42533	7.9861	2.42533	19.1331	2.425	7.5246	2.42533	7.9721	2.42517	4.65605	2.425	10.3717
2.4335	1.41535	2.4335	1.56085	2.43367	7.3981	2.43367	17.4226	2.43333	7.39745	2.43367	7.45175	2.4335	4.49445	2.43333	9.5631
2.44183	1.38735	2.44183	1.53425	2.442	6.888	2.442	15.9266	2.44167	7.29065	2.442	6.9939	2.44183	4.34525	2.44167	8.8694
2.45017	1.3643	2.45017	1.5129	2.45033	6.44045	2.45033	14.6181	2.45	7.1971	2.45033	6.5913	2.45017	4.21165	2.45	8.2685
2.4585	1.34385	2.4585	1.4933	2.45867	6.0508	2.45867	13.4696	2.45833	7.11345	2.45867	6.23885	2.4585	4.0904	2.45833	7.74935
2.46683	1.3234	2.46683	1.47145	2.467	5.70555	2.467	12.4638	2.46667	7.0387	2.467	5.92515	2.46683	3.97355	2.46667	7.29775
2.47517	1.3059	2.47517	1.45025	2.47533	5.40555	2.47533	11.5737	2.475	6.9697	2.47533	5.64895	2.47517	3.87845	2.475	6.9005
2.4835	1.28715	2.4835	1.428	2.48367	5.1393	2.48367	10.787	2.48333	6.90215	2.48367	5.4	2.4835	3.7853	2.48333	6.55435
2.49183	1.26965	2.49183	1.4046	2.492	4.90475	2.492	10.0869	2.49167	6.8423	2.492	5.17915	2.49183	3.69715	2.49167	6.2428
2.50017	1.24955	2.50017	1.37675	2.50033	4.6976	2.50033	9.4662	2.5	6.7903	2.50033	4.98305	2.50017	3.6222	2.5	5.96625
2.5085	1.22915	2.5085	1.35125	2.50867	4.5129	2.50867	8.91165	2.50833	6.7557	2.50867	4.8079	2.5085	3.5512	2.50833	5.71585
2.51683	1.2081	2.51683	1.32195	2.517	4.35095	2.517	8.4152	2.51667	6.7365	2.517	4.65425	2.51683	3.4915	2.51667	5.4919
2.52517	1.18755	2.52517	1.2966	2.52533	4.20995	2.52533	7.96575	2.525	6.72975	2.52533	4.5186	2.52517	3.4386	2.525	5.28645
2.5335	1.1649	2.5335	1.2661	2.53367	4.07855	2.53367	7.55695	2.53333	6.7297	2.53367	4.3962	2.5335	3.3904	2.53333	5.1014
2.54183	1.1477	2.54183	1.242	2.542	3.9615	2.542	7.1887	2.54167	6.73285	2.542	4.28235	2.54183	3.3465	2.54167	4.9283
2.55017	1.127	2.55017	1.2127	2.55033	3.8494	2.55033	6.8548	2.55	6.7266	2.55033	4.1763	2.55017	3.29975	2.55	4.7716
2.5585	1.1105	2.5585	1.1911	2.55867	3.74155	2.55867	6.54975	2.55833	6.70335	2.55867	4.0713	2.5585	3.2526	2.55833	4.6239
2.56683	1.0923	2.56683	1.16835	2.567	3.636	2.567	6.2663	2.56667	6.6656	2.567	3.9704	2.56683	3.2005	2.56667	4.48725
2.57517	1.074	2.57517	1.14775	2.57533	3.53255	2.57533	6.00615	2.575	6.61045	2.57533	3.86855	2.57517	3.1472	2.575	4.35925
2.5835	1.0575	2.5835	1.12615	2.58367	3.43185	2.58367	5.76205	2.58333	6.54095	2.58367	3.77015	2.5835	3.09095	2.58333	4.23535
2.59183	1.0426	2.59183	1.1082	2.592	3.33215	2.592	5.5401	2.59167	6.4625	2.592	3.6729	2.59183	3.031	2.59167	4.12535
2.60017	1.02945	2.60017	1.0939	2.60033	3.2455	2.60033	5.3426	2.6	6.3748	2.60033	3.5873	2.60017	2.97415	2.6	4.0348
2.6085	1.03385	2.6085	1.0936	2.60867	3.1832	2.60867	5.1826	2.60833	6.28815	2.60867	3.52655	2.6085	2.9334	2.60833	3.98125
2.61683	1.0682	2.61683	1.12705	2.617	3.1662	2.617	5.07765	2.61667	6.20065	2.617	3.5155	2.61683	2.92515	2.61667	3.98775
2.62517	1.1519	2.62517	1.20315	2.62533	3.21265	2.62533	5.03715	2.625	6.13255	2.62533	3.5686	2.62517	2.96815	2.625	4.0659
2.6335	1.2962	2.6335	1.33725	2.63367	3.32625	2.63367	5.0603	2.63333	6.13775	2.63367	3.69955	2.6335	3.07695	2.63333	4.2155
2.64183	1.49285	2.64183	1.5185	2.642	3.49525	2.642	5.12035	2.64167	6.42985	2.642	3.8888	2.64183	3.2528	2.64167	4.4149
2.65017	1.72485	2.65017	1.7332	2.65033	3.69195	2.65033	5.1787	2.65	7.50215	2.65033	4.1098	2.65017	3.47125	2.65	4.62385
2.6585	1.96295	2.6585	1.9519	2.65867	3.87545	2.65867	5.1996	2.65833	10.1613	2.65867	4.31895	2.6585	3.6928	2.65833	4.8075
2.66683	2.1672	2.66683	2.1455	2.667	4.0138	2.667	5.15455	2.66667	15.2804	2.667	4.47925	2.66683	3.882	2.66667	4.92685
2.67517	2.30945	2.67517	2.2863	2.67533	4.0847	2.67533	5.04805	2.675	23.3003	2.67533	4.56465	2.67517	4.0093	2.675	4.9719
2.6835	2.37955	2.6835	2.3672	2.68367	4.0834	2.68367	4.8917	2.68333	33.8154	2.68367	4.5709	2.6835	4.0637	2.68333	4.9334
2.69183	2.3802	2.69183	2.3825	2.692	4.01385	2.692	4.7018	2.69167	45.5977	2.692	4.5047	2.69183	4.04075	2.69167	4.82845
2.70017	2.3255	2.70017	2.34725	2.70033	3.89865	2.70033	4.5021	2.7	57.0171	2.70033	4.3842	2.70017	3.9629	2.7	4.6843
2.7085	2.22925	2.7085	2.27175	2.70867	3.75295	2.70867	4.30345	2.70833	66.6112	2.70867	4.22775	2.7085	3.83695	2.70833	4.5135
2.71683	2.1182	2.71683	2.175	2.717	3.5961	2.717	4.11615	2.71667	73.3444	2.717	4.0558	2.71683	3.68965	2.71667	4.3348
2.72517	2.00755	2.72517	2.0807	2.72533	3.44125	2.72533	3.94175	2.725	76.8678	2.72533	3.8874	2.72517	3.53605	2.725	4.16135
2.7335	1.94685	2.7335	2.0278	2.73367	3.30035	2.73367	3.78955	2.73333	77.3911	2.73367	3.72775	2.7335	3.3845	2.73333	3.99985
2.74183	1.7232	2.74183	1.81005	2.742	3.1816	2.742	3.6553	2.74167	75.4193	2.742	3.59265	2.74183	3.2472	2.74167	3.85705
2.75017	1.697	2.75017	1.7843	2.75033	3.08445	2.75033	3.5392	2.75	71.5738	2.75033	3.47635	2.75017	3.13255	2.75	3.7342
2.7585	1.6603	2.7585	1.74595	2.75867	3.01105	2.75867	3.4378	2.75833	66.5087	2.75867	3.3884	2.7585	3.04255	2.75833	3.63195
2.76683	1.6058	2.76683	1.6856	2.767	2.96815	2.767	3.3578	2.76667	60.7766	2.767	3.32925	2.76683	2.9865	2.76667	3.5456
2.77517	1.5648	2.77517	1.64025	2.77533	2.9416	2.77533	3.2914	2.775	54.8032	2.77533	3.293	2.77517	2.9532	2.775	3.47855
2.7835	1.53735	2.7835	1.60735	2.78367	2.9359	2.78367	3.23455	2.78333	48.9305	2.78367	3.27545	2.7835	2.94405	2.78333	3.42375
2.79183	1.5182	2.79183	1.5848	2.792	2.94335	2.792	3.18565	2.79167	43.3737	2.792	3.27675	2.79183	2.9534	2.79167	3.3763
2.80017	1.5017	2.80017	1.5661	2.80033	2.95685	2.80033	3.14175	2.8	38.274	2.80033	3.2832	2.80017	2.97175	2.8	3.34175
2.8085	1.4864	2.8085	1.5493	2.80867	2.9699	2.80867	3.09685	2.80833	33.6981	2.80867	3.2921	2.8085	2.99325	2.80833	3.3084
2.81683	1.4746	2.81683	1.53555	2.817	2.9809	2.817	3.05485	2.81667	29.6749	2.817	3.2996	2.81683	3.01315	2.81667	3.27625
2.82517	1.4602	2.82517	1.5223	2.82533	2.9854	2.82533	3.0106	2.825	26.196	2.82533	3.3025	2.82517	3.03195	2.825	3.2443
2.8335	1.44195	2.8335	1.5088	2.83367	2.98545	2.83367	2.9641	2.83333	23.2189	2.83367	3.3008	2.8335	3.0454	2.83333	3.21385
2.84183	1.42295	2.84183	1.49735	2.842	2.97765	2.842	2.91775	2.84167	20.6994	2.842	3.29245	2.84183	3.0513	2.84167	3.18285
2.85017	1.4007	2.85017	1.4889	2.85033	2.9691	2.85033	2.8699	2.85	18.5771	2.85033	3.2825	2.85017	3.0527	2.85	3.1514
2.8585	1.37875	2.8585	1.48175	2.85867	2.95755	2.85867	2.8273	2.85833	16.8002	2.85867	3.26845	2.8585	3.05065	2.85833	3.1284
2.86683	1.35695	2.86683	1.4792	2.867	2.9535	2.867	2.78645	2.86667	15.3127	2.867	3.26035	2.86683	3.0474	2.86667	3.1115
2.87517	1.3317	2.87517	1.47755	2.87533	2.96	2.87533	2.7533	2.875	14.0652	2.87533	3.2598	2.87517	3.05165	2.875	3.106
2.8835	1.30775	2.8835	1.481	2.88367	2.98325	2.88367	2.7263	2.88333	13.019	2.88367	3.274	2.8835	3.06815	2.88333	3.1185
2.89183	1.28315	2.89183	1.4832	2.892	3.02585	2.892	2.71065	2.89167	12.1356	2.892	3.30465	2.89183	3.10105	2.89167	3.14325
2.90017	1.2545	2.90017	1.4832	2.90033	3.08175	2.90033	2.70045	2.9	11.3824	2.90033	3.34725	2.90017	3.1463	2.9	3.1819
2.9085	1.2299	2.9085	1.4885	2.90867	3.14385	2.90867	2.6958	2.90833	10.7486	2.90867	3.39635	2.9085	3.1989	2.90833	3.22585
2.91683	1.2054	2.91683	1.4916	2.917	3.1998	2.917	2.68615	2.91667	10.2176	2.917	3.4416	2.91683	3.25145	2.91667	3.27005
2.92517	1.18335	2.92517	1.4968	2.92533	3.2417	2.92533	2.67855	2.925	9.77405	2.92533	3.4734	2.92517	3.29765	2.925	3.30535
2.9335	1.1744	2.9335	1.51475	2.93367	3.2628	2.93367	2.6658	2.93333	9.77265	2.93367	3.4858	2.9335	3.32305	2.93333	3.33585
2.94183	1.20755	2.94183	1.5725	2.942	3.2602	2.942	2.6486	2.94167	9.08575	2.942	3.47935	2.94183	3.33105	2.94167	3.3564
2.95017	1.06315	2.95017	1.4577	2.95033	3.24295	2.95033	2.6266	2.95	8.8247	2.95033	3.4558	2.95017	3.3201	2.95	3.36785
2.9585	1.09225	2.9585	1.51725	2.95867	3.21255	2.95867	2.6011	2.95833	8.6	2.95867	3.4261	2.9585	3.30115	2.95833	3.3701
2.96683	1.08895	2.96683	1.54005	2.967	3.1717	2.967	2.57145	2.96667	8.4011	2.967	3.3846	2.96683	3.26695	2.96667	3.36455
2.97517	1.0604	2.97517	1.53775	2.97533	3.1314	2.97533	2.53945	2.975	8.2209	2.97533	3.3447	2.97517	3.23325	2.975	3.3543
2.9835	1.03595	2.9835	1.5386	2.98367	3.0869	2.98367	2.50715	2.98333	8.05685	2.98367	3.29845	2.9835	3.19245	2.98333	3.33715
2.99183	1.01805	2.99183	1.5372	2.992	3.0392	2.992	2.47225	2.99167	7.91075	2.992	3.25395	2.99183	3.15675	2.99167	3.3148
3.00017	0.99975	3.00017	1.5377	3.00033	2.9971	3.00033	2.4378	3	7.77225	3.00033	3.2113	3.00017	3.11835	3	3.29235
3.0085	0.98325	3.0085	1.53265	3.00867	2.9548	3.00867	2.40335	3.00833	7.6488	3.00867	3.171	3.0085	3.0828	3.00833	3.26545
3.01683	0.9684	3.01683	1.5266	3.017	2.9158	3.017	2.3702	3.01667	7.5291	3.017	3.13405	3.01683	3.05215	3.01667	3.2388
3.02517	0.95305	3.02517	1.51625	3.02533	2.8764	3.02533	2.33615	3.025	7.415	3.02533	3.09755	3.02517	3.02135	3.025	3.21445
3.0335	0.9416	3.0335	1.5039	3.03367	2.84065	3.03367	2.30375	3.03333	7.2968	3.03367	3.0626	3.0335	2.9934	3.03333	3.18655
3.04183	0.92955	3.04183	1.49365	3.042	2.8057	3.042	2.27495	3.04167	7.1819	3.042	3.0307	3.04183	2.9639	3.04167	3.15815
3.05017	0.91855	3.05017	1.48	3.05033	2.7715	3.05033	2.24515	3.05	7.0634	3.05033	2.99665	3.05017	2.93665	3.05	3.12965
3.0585	0.90665	3.0585	1.46715	3.05867	2.73965	3.05867	2.21445	3.05833	6.9457	3.05867	2.9657	3.0585	2.91075	3.05833	3.1021
3.06683	0.8983	3.06683	1.4532	3.067	2.7076	3.067	2.18805	3.06667	6.82965	3.067	2.93645	3.06683	2.8866	3.06667	3.07405
3.07517	0.88635	3.07517	1.43255	3.07533	2.67315	3.07533	2.1605	3.075	6.7202	3.07533	2.90235	3.07517	2.85995	3.075	3.04915
3.0835	0.87795	3.0835	1.4215	3.08367	2.6421	3.08367	2.1344	3.08333	6.61625	3.08367	2.8736	3.0835	2.83465	3.08333	3.02055
3.09183	0.86805	3.09183	1.4034	3.092	2.6098	3.092	2.1113	3.09167	6.5217	3.092	2.8443	3.09183	2.8093	3.09167	2.99515
3.10017	0.8576	3.10017	1.38785	3.10033	2.58025	3.10033	2.0893	3.1	6.43835	3.10033	2.81565	3.10017	2.78405	3.1	2.9702
3.1085	0.8472	3.1085	1.3736	3.10867	2.55215	3.10867	2.06625	3.10833	6.36805	3.10867	2.78975	3.1085	2.7606	3.10833	2.9456
3.11683	0.8385	3.11683	1.3585	3.117	2.52495	3.117	2.0501	3.11667	6.3107	3.117	2.7631	3.11683	2.7414	3.11667	2.9238
3.12517	0.82685	3.12517	1.34165	3.12533	2.4973	3.12533	2.0351	3.125	6.2626	3.12533	2.73715	3.12517	2.7164	3.125	2.90145
3.1335	0.814	3.1335	1.32375	3.13367	2.474	3.13367	2.023	3.13333	6.22265	3.13367	2.7154	3.1335	2.69715	3.13333	2.8802
3.14183	0.8045	3.14183	1.31035	3.142	2.45055	3.142	2.011	3.14167	6.1868	3.142	2.69635	3.14183	2.6777	3.14167	2.85975
3.15017	0.79735	3.15017	1.2964	3.15033	2.4298	3.15033	1.9979	3.15	6.14735	3.15033	2.6761	3.15017	2.66135	3.15	2.8395
3.1585	0.78825	3.1585	1.2838	3.15867	2.407	3.15867	1.98545	3.15833	6.10575	3.15867	2.65715	3.1585	2.6433	3.15833	2.8211
3.16683	0.7793	3.16683	1.26925	3.167	2.3871	3.167	1.9715	3.16667	6.0571	3.167	2.64105	3.16683	2.6283	3.16667	2.80005
3.17517	0.77105	3.17517	1.2551	3.17533	2.3643	3.17533	1.9529	3.175	6.007	3.17533	2.62115	3.17517	2.61025	3.175	2.77465
3.1835	0.7609	3.1835	1.2404	3.18367	2.3401	3.18367	1.9318	3.18333	5.9526	3.18367	2.6007	3.1835	2.5901	3.18333	2.7485
3.19183	0.74875	3.19183	1.2237	3.192	2.3171	3.192	1.9058	3.19167	5.89875	3.192	2.5781	3.19183	2.56915	3.19167	2.7197
3.20017	0.7398	3.20017	1.20725	3.20033	2.29155	3.20033	1.87775	3.2	5.84685	3.20033	2.554	3.20017	2.5485	3.2	2.6902
3.2085	0.72785	3.2085	1.19	3.20867	2.2641	3.20867	1.85055	3.20833	5.7962	3.20867	2.5309	3.2085	2.52775	3.20833	2.65535
3.21683	0.72125	3.21683	1.17895	3.217	2.2384	3.217	1.8244	3.21667	5.74775	3.217	2.50275	3.21683	2.50235	3.21667	2.62585
3.22517	0.71125	3.22517	1.16395	3.22533	2.21205	3.22533	1.8021	3.225	5.69975	3.22533	2.4793	3.22517	2.47975	3.225	2.59345
3.2335	0.7024	3.2335	1.148	3.23367	2.1869	3.23367	1.78315	3.23333	5.6527	3.23367	2.46015	3.2335	2.45755	3.23333	2.5671
3.24183	0.69295	3.24183	1.1339	3.242	2.16365	3.242	1.76865	3.24167	5.6004	3.242	2.43885	3.24183	2.43665	3.24167	2.53775
3.25017	0.6841	3.25017	1.1193	3.25033	2.14215	3.25033	1.75825	3.25	5.54815	3.25033	2.42235	3.25017	2.41695	3.25	2.51435
3.2585	0.67485	3.2585	1.10485	3.25867	2.1201	3.25867	1.75025	3.25833	5.49865	3.25867	2.40795	3.2585	2.39985	3.25833	2.48875
3.26683	0.6678	3.26683	1.0904	3.267	2.10005	3.267	1.74345	3.26667	5.4461	3.267	2.3942	3.26683	2.38305	3.26667	2.46895
3.27517	0.66105	3.27517	1.0802	3.27533	2.08045	3.27533	1.7349	3.275	5.39445	3.27533	2.37875	3.27517	2.3667	3.275	2.4492
3.2835	0.65335	3.2835	1.06725	3.28367	2.0602	3.28367	1.7312	3.28333	5.34385	3.28367	2.3655	3.2835	2.352	3.28333	2.4297
3.29183	0.6487	3.29183	1.0552	3.292	2.0417	3.292	1.72355	3.29167	5.2953	3.292	2.3516	3.29183	2.3344	3.29167	2.41
3.30017	0.6445	3.30017	1.04745	3.30033	2.0233	3.30033	1.71505	3.3	5.2508	3.30033	2.3391	3.30017	2.3208	3.3	2.39025
3.3085	0.6419	3.3085	1.0383	3.30867	2.00485	3.30867	1.70445	3.30833	5.20925	3.30867	2.32145	3.3085	2.3043	3.30833	2.36955
3.31683	0.63705	3.31683	1.0295	3.317	1.9849	3.317	1.6917	3.31667	5.17125	3.317	2.30835	3.31683	2.28735	3.31667	2.3494
3.32517	0.634	3.32517	1.0214	3.32533	1.96875	3.32533	1.67985	3.325	5.1408	3.32533	2.29405	3.32517	2.27245	3.325	2.32725
3.3335	0.63275	3.3335	1.0143	3.33367	1.9491	3.33367	1.6652	3.33333	5.114	3.33367	2.27575	3.3335	2.25475	3.33333	2.30905
3.34183	0.62865	3.34183	1.00675	3.342	1.9338	3.342	1.64865	3.34167	5.0907	3.342	2.2622	3.34183	2.24025	3.34167	2.28805
3.35017	0.6274	3.35017	1.00075	3.35033	1.91615	3.35033	1.6338	3.35	5.074	3.35033	2.2487	3.35017	2.2247	3.35	2.2663
3.3585	0.6263	3.3585	0.9926	3.35867	1.89855	3.35867	1.6223	3.35833	5.06625	3.35867	2.2315	3.3585	2.211	3.35833	2.2447
3.36683	0.62465	3.36683	0.98655	3.367	1.8825	3.367	1.60605	3.36667	5.0613	3.367	2.2172	3.36683	2.19315	3.36667	2.22645
3.37517	0.6221	3.37517	0.9803	3.37533	1.86585	3.37533	1.5891	3.375	5.05885	3.37533	2.20125	3.37517	2.1659	3.375	2.2077
3.3835	0.62205	3.3835	0.975	3.38367	1.847	3.38367	1.5778	3.38333	5.05905	3.38367	2.1824	3.3835	2.15645	3.38333	2.18655
3.39183	0.61895	3.39183	0.9668	3.392	1.82885	3.392	1.56225	3.39167	5.06005	3.392	2.1673	3.39183	2.1444	3.39167	2.16745
3.40017	0.61525	3.40017	0.95795	3.40033	1.8101	3.40033	1.5461	3.4	5.0635	3.40033	2.14765	3.40017	2.125	3.4	2.14805
3.4085	0.6126	3.4085	0.95225	3.40867	1.7927	3.40867	1.53075	3.40833	5.0674	3.40867	2.1316	3.4085	2.10925	3.40833	2.12925
3.41683	0.60805	3.41683	0.9431	3.417	1.7766	3.417	1.51995	3.41667	5.0737	3.417	2.1143	3.41683	2.0935	3.41667	2.1116
3.42517	0.60935	3.42517	0.9401	3.42533	1.7571	3.42533	1.50765	3.425	5.0799	3.42533	2.09505	3.42517	2.0741	3.425	2.0965
3.4335	0.60685	3.4335	0.9329	3.43367	1.7426	3.43367	1.49505	3.43333	5.0878	3.43367	2.08005	3.4335	2.0607	3.43333	2.0816
3.44183	0.602	3.44183	0.92515	3.442	1.7273	3.442	1.48615	3.44167	5.0896	3.442	2.06625	3.44183	2.046	3.44167	2.06775
3.45017	0.60345	3.45017	0.92105	3.45033	1.7134	3.45033	1.47855	3.45	5.0928	3.45033	2.05085	3.45017	2.0323	3.45	2.05345
3.4585	0.59835	3.4585	0.9152	3.45867	1.69885	3.45867	1.47155	3.45833	5.0878	3.45867	2.039	3.4585	2.01985	3.45833	2.043
3.46683	0.5971	3.46683	0.9093	3.467	1.687	3.467	1.46235	3.46667	5.0762	3.467	2.0254	3.46683	2.00825	3.46667	2.0329
3.47517	0.58825	3.47517	0.8987	3.47533	1.6773	3.47533	1.4533	3.475	5.06035	3.47533	2.01615	3.47517	1.99705	3.475	2.02305
3.4835	0.5821	3.4835	0.88895	3.48367	1.6691	3.48367	1.44455	3.48333	5.0375	3.48367	2.0088	3.4835	1.98805	3.48333	2.01285
3.49183	0.5749	3.49183	0.8781	3.492	1.6618	3.492	1.4368	3.49167	5.01005	3.492	1.99915	3.49183	1.97895	3.49167	2.00075
3.50017	0.57095	3.50017	0.87185	3.50033	1.65035	3.50033	1.4268	3.5	4.9789	3.50033	1.9868	3.50017	1.9661	3.5	1.99205
3.5085	0.56355	3.5085	0.86075	3.50867	1.6423	3.50867	1.41665	3.50833	4.94435	3.50867	1.97815	3.5085	1.95815	3.50833	1.98035
3.51683	0.55805	3.51683	0.8515	3.517	1.63245	3.517	1.4073	3.51667	4.91035	3.517	1.9686	3.51683	1.94775	3.51667	1.96605
3.52517	0.5495	3.52517	0.84145	3.52533	1.62265	3.52533	1.39535	3.525	4.8736	3.52533	1.9584	3.52517	1.93715	3.525	1.95565
3.5335	0.54555	3.5335	0.8342	3.53367	1.61255	3.53367	1.387	3.53333	4.83565	3.53367	1.9471	3.5335	1.9257	3.53333	1.9425
3.54183	0.5394	3.54183	0.82385	3.542	1.6006	3.542	1.37475	3.54167	4.80225	3.542	1.93665	3.54183	1.91375	3.54167	1.9285
3.55017	0.5354	3.55017	0.8181	3.55033	1.58995	3.55033	1.3661	3.55	4.7714	3.55033	1.9249	3.55017	1.902	3.55	1.9173
3.5585	0.5302	3.5585	0.81	3.55867	1.5763	3.55867	1.35735	3.55833	4.73925	3.55867	1.91355	3.5585	1.8895	3.55833	1.9041
3.56683	0.52655	3.56683	0.80445	3.567	1.5653	3.567	1.34755	3.56667	4.7124	3.567	1.9022	3.56683	1.8771	3.56667	1.8926
3.57517	0.5234	3.57517	0.79825	3.57533	1.55315	3.57533	1.3416	3.575	4.686	3.57533	1.8897	3.57517	1.8682	3.575	1.88105
3.5835	0.5192	3.5835	0.7912	3.58367	1.54055	3.58367	1.33145	3.58333	4.6614	3.58367	1.8792	3.5835	1.85	3.58333	1.874
3.59183	0.51515	3.59183	0.7877	3.592	1.52725	3.592	1.32085	3.59167	4.6375	3.592	1.8662	3.59183	1.83875	3.59167	1.86265
3.60017	0.51285	3.60017	0.78145	3.60033	1.5188	3.60033	1.311	3.6	4.61735	3.60033	1.8546	3.60017	1.83055	3.6	1.8519
3.6085	0.51135	3.6085	0.77685	3.60867	1.50575	3.60867	1.3051	3.60833	4.59795	3.60867	1.842	3.6085	1.8175	3.60833	1.8427
3.61683	0.5071	3.61683	0.77185	3.617	1.49555	3.617	1.2954	3.61667	4.57915	3.617	1.8308	3.61683	1.8065	3.61667	1.83465
3.62517	0.5052	3.62517	0.76855	3.62533	1.4863	3.62533	1.2917	3.625	4.56115	3.62533	1.8231	3.62517	1.79535	3.625	1.82635
3.6335	0.5042	3.6335	0.76275	3.63367	1.4768	3.63367	1.2832	3.63333	4.54585	3.63367	1.8126	3.6335	1.78685	3.63333	1.81815
3.64183	0.49985	3.64183	0.75705	3.642	1.47355	3.642	1.27985	3.64167	4.53025	3.642	1.809	3.64183	1.7799	3.64167	1.81235
3.65017	0.5003	3.65017	0.7548	3.65033	1.4686	3.65033	1.27725	3.65	4.51415	3.65033	1.8062	3.65017	1.7777	3.65	1.8089
3.6585	0.49675	3.6585	0.7491	3.65867	1.4667	3.65867	1.2754	3.65833	4.50235	3.65867	1.8034	3.6585	1.7745	3.65833	1.8069
3.66683	0.49645	3.66683	0.74725	3.667	1.46585	3.667	1.2716	3.66667	4.48745	3.667	1.8058	3.66683	1.7746	3.66667	1.80385
3.67517	0.4931	3.67517	0.7439	3.67533	1.4678	3.67533	1.26805	3.675	4.4743	3.67533	1.8072	3.67517	1.7759	3.675	1.8022
3.6835	0.4953	3.6835	0.74345	3.68367	1.46865	3.68367	1.26205	3.68333	4.4616	3.68367	1.8077	3.6835	1.77615	3.68333	1.79745
3.69183	0.49665	3.69183	0.745	3.692	1.4657	3.692	1.25485	3.69167	4.45165	3.692	1.80525	3.69183	1.7735	3.69167	1.7934
3.70017	0.4951	3.70017	0.7462	3.70033	1.46185	3.70033	1.2465	3.7	4.44075	3.70033	1.80275	3.70017	1.77215	3.7	1.7838
3.7085	0.4958	3.7085	0.74455	3.70867	1.4555	3.70867	1.2365	3.70833	4.42795	3.70867	1.79465	3.7085	1.76495	3.70833	1.77605
3.71683	0.4922	3.71683	0.7438	3.717	1.4451	3.717	1.22625	3.71667	4.4188	3.717	1.7849	3.71683	1.7539	3.71667	1.76425
3.72517	0.49145	3.72517	0.7429	3.72533	1.43235	3.72533	1.21795	3.725	4.4065	3.72533	1.77205	3.72517	1.741	3.725	1.75685
3.7335	0.49175	3.7335	0.7444	3.73367	1.41935	3.73367	1.2099	3.73333	4.39755	3.73367	1.75815	3.7335	1.72775	3.73333	1.74545
3.74183	0.4914	3.74183	0.744	3.742	1.40495	3.742	1.2014	3.74167	4.38585	3.742	1.74275	3.74183	1.71295	3.74167	1.7358
3.75017	0.48945	3.75017	0.74435	3.75033	1.3916	3.75033	1.19445	3.75	4.3739	3.75033	1.72725	3.75017	1.69855	3.75	1.72625
3.7585	0.48635	3.7585	0.7398	3.75867	1.3797	3.75867	1.1912	3.75833	4.36105	3.75867	1.7124	3.7585	1.6841	3.75833	1.72265
3.76683	0.4857	3.76683	0.7381	3.767	1.36965	3.767	1.1876	3.76667	4.3468	3.767	1.70095	3.76683	1.67345	3.76667	1.7161
3.77517	0.4836	3.77517	0.73665	3.77533	1.35955	3.77533	1.18525	3.775	4.33205	3.77533	1.69015	3.77517	1.6632	3.775	1.7161
3.7835	0.4819	3.7835	0.7355	3.78367	1.35165	3.78367	1.18475	3.78333	4.31685	3.78367	1.67975	3.7835	1.6539	3.78333	1.71505
3.79183	0.4794	3.79183	0.7294	3.792	1.34615	3.792	1.18425	3.79167	4.3033	3.792	1.67325	3.79183	1.6478	3.79167	1.7204
3.80017	0.4757	3.80017	0.7256	3.80033	1.34425	3.80033	1.18655	3.8	4.28915	3.80033	1.66785	3.80017	1.64405	3.8	1.7223
3.8085	0.47415	3.8085	0.72105	3.80867	1.34435	3.80867	1.188	3.80833	4.2778	3.80867	1.6631	3.8085	1.6408	3.80833	1.72945
3.81683	0.4699	3.81683	0.7183	3.817	1.3474	3.817	1.18985	3.81667	4.2715	3.817	1.66065	3.81683	1.63975	3.81667	1.72945
3.82517	0.46565	3.82517	0.7128	3.82533	1.3526	3.82533	1.18685	3.825	4.26705	3.82533	1.6615	3.82517	1.6409	3.825	1.7303
3.8335	0.4609	3.8335	0.7083	3.83367	1.3568	3.83367	1.18505	3.83333	4.26765	3.83367	1.65705	3.8335	1.6414	3.83333	1.72865
3.84183	0.4564	3.84183	0.70455	3.842	1.3632	3.842	1.1814	3.84167	4.2703	3.842	1.656	3.84183	1.64295	3.84167	1.7262
3.85017	0.4549	3.85017	0.69925	3.85033	1.36755	3.85033	1.178	3.85	4.27695	3.85033	1.65525	3.85017	1.6441	3.85	1.7196
3.8585	0.45015	3.8585	0.69535	3.85867	1.3657	3.85867	1.1721	3.85833	4.2819	3.85867	1.64995	3.8585	1.6406	3.85833	1.7153
3.86683	0.44805	3.86683	0.69165	3.867	1.3653	3.867	1.16845	3.86667	4.2856	3.867	1.6465	3.86683	1.63965	3.86667	1.70425
3.87517	0.44415	3.87517	0.687	3.87533	1.3618	3.87533	1.16395	3.875	4.2843	3.87533	1.64045	3.87517	1.63435	3.875	1.69915
3.8835	0.4422	3.8835	0.68345	3.88367	1.3598	3.88367	1.16055	3.88333	4.27885	3.88367	1.6378	3.8835	1.6322	3.88333	1.6906
3.89183	0.43925	3.89183	0.68105	3.892	1.35465	3.892	1.1552	3.89167	4.26905	3.892	1.6344	3.89183	1.62715	3.89167	1.6833
3.90017	0.43265	3.90017	0.674	3.90033	1.349	3.90033	1.15295	3.9	4.2546	3.90033	1.629	3.90017	1.6225	3.9	1.67845
3.9085	0.43215	3.9085	0.67405	3.90867	1.34315	3.90867	1.148	3.90833	4.2382	3.90867	1.62735	3.9085	1.6177	3.90833	1.67385
3.91683	0.42925	3.91683	0.66985	3.917	1.33755	3.917	1.14275	3.91667	4.2187	3.917	1.6263	3.91683	1.6134	3.91667	1.66325
3.92517	0.4277	3.92517	0.6665	3.92533	1.3284	3.92533	1.1363	3.925	4.1983	3.92533	1.6169	3.92517	1.60895	3.925	1.65705
3.9335	0.42605	3.9335	0.6629	3.93367	1.3201	3.93367	1.13145	3.93333	4.17815	3.93367	1.62225	3.9335	1.603	3.93333	1.65
3.94183	0.4253	3.94183	0.6625	3.942	1.31105	3.942	1.12475	3.94167	4.15915	3.942	1.60835	3.94183	1.592	3.94167	1.6402
3.95017	0.42235	3.95017	0.6589	3.95033	1.30325	3.95033	1.11905	3.95	4.13915	3.95033	1.5348	3.95017	1.58855	3.95	1.6322
3.9585	0.42175	3.9585	0.65885	3.95867	1.29155	3.95867	1.11285	3.95833	4.12115	3.95867	1.57265	3.9585	1.5781	3.95833	1.6234
3.96683	0.4186	3.96683	0.65605	3.967	1.28135	3.967	1.1081	3.96667	4.10315	3.967	1.584	3.96683	1.56995	3.96667	1.61715
3.97517	0.41585	3.97517	0.6547	3.97533	1.2726	3.97533	1.10625	3.975	4.08585	3.97533	1.5883	3.97517	1.5613	3.975	1.6113
3.9835	0.41285	3.9835	0.65185	3.98367	1.26485	3.98367	1.10155	3.98333	4.0744	3.98367	1.58185	3.9835	1.55575	3.98333	1.60265
3.99183	0.4114	3.99183	0.6484	3.992	1.2549	3.992	1.09975	3.99167	4.0648	3.992	1.56885	3.99183	1.54535	3.99167	1.5979
4.00017	0.40955	4.00017	0.6458	4.00033	1.2507	4.00033	1.0956	4	4.0597	4.00033	1.56725	4.00017	1.5394	4	1.5968
4.0085	0.4054	4.0085	0.64195	4.00867	1.24665	4.00867	1.0929	4.00833	4.05615	4.00867	1.56535	4.0085	1.5347	4.00833	1.59115
4.01683	0.4064	4.01683	0.64	4.017	1.2414	4.017	1.08545	4.01667	4.0584	4.017	1.56035	4.01683	1.5321	4.01667	1.58505
4.02517	0.4024	4.02517	0.6359	4.02533	1.2371	4.02533	1.0817	4.025	4.05985	4.02533	1.5564	4.02517	1.5268	4.025	1.5792
4.0335	0.403	4.0335	0.6349	4.03367	1.2322	4.03367	1.07445	4.03333	4.068	4.03367	1.5524	4.0335	1.5215	4.03333	1.57365
4.04183	0.4001	4.04183	0.63295	4.042	1.2291	4.042	1.0669	4.04167	4.07315	4.042	1.5498	4.04183	1.51765	4.04167	1.56315
4.05017	0.3987	4.05017	0.62935	4.05033	1.222	4.05033	1.0574	4.05	4.0768	4.05033	1.5404	4.05017	1.50865	4.05	1.55155
4.0585	0.3969	4.0585	0.62945	4.05867	1.2122	4.05867	1.0482	4.05833	4.07385	4.05867	1.53025	4.0585	1.50005	4.05833	1.5417
4.06683	0.3934	4.06683	0.6275	4.067	1.1991	4.067	1.04135	4.06667	4.0713	4.067	1.51545	4.06683	1.4865	4.06667	1.5311
4.07517	0.39565	4.07517	0.62795	4.07533	1.1907	4.07533	1.03335	4.075	4.0611	4.07533	1.50725	4.07517	1.4759	4.075	1.5209
4.0835	0.39465	4.0835	0.62855	4.08367	1.17765	4.08367	1.02725	4.08333	4.0475	4.08367	1.4915	4.0835	1.46405	4.08333	1.51075
4.09183	0.39295	4.09183	0.62525	4.092	1.16745	4.092	1.02225	4.09167	4.03075	4.092	1.47985	4.09183	1.45305	4.09167	1.5027
4.10017	0.39055	4.10017	0.625	4.10033	1.16005	4.10033	1.0218	4.1	4.0092	4.10033	1.4698	4.10017	1.44435	4.1	1.4989
4.1085	0.3914	4.1085	0.62365	4.10867	1.15465	4.10867	1.018	4.10833	3.99015	4.10867	1.4651	4.1085	1.4384	4.10833	1.4987
4.11683	0.39095	4.11683	0.6227	4.117	1.1523	4.117	1.0189	4.11667	3.96645	4.117	1.46045	4.11683	1.43485	4.11667	1.49995
4.12517	0.3917	4.12517	0.62325	4.12533	1.15545	4.12533	1.01575	4.125	3.94605	4.12533	1.4592	4.12517	1.43635	4.125	1.506
4.1335	0.3895	4.1335	0.6223	4.13367	1.1581	4.13367	1.01775	4.13333	3.92635	4.13367	1.4607	4.1335	1.4362	4.13333	1.51235
4.14183	0.38665	4.14183	0.62165	4.142	1.15935	4.142	1.01655	4.14167	3.908	4.142	1.46125	4.14183	1.44235	4.14167	1.51875
4.15017	0.389	4.15017	0.6223	4.15033	1.1607	4.15033	1.01485	4.15	3.89055	4.15033	1.4611	4.15017	1.44205	4.15	1.5226
4.1585	0.3855	4.1585	0.62045	4.15867	1.16315	4.15867	1.0116	4.15833	3.87635	4.15867	1.46315	4.1585	1.445	4.15833	1.52925
4.16683	0.3849	4.16683	0.62035	4.167	1.16365	4.167	1.00995	4.16667	3.86615	4.167	1.45955	4.16683	1.4425	4.16667	1.53
4.17517	0.3837	4.17517	0.61725	4.17533	1.162	4.17533	1.00425	4.175	3.85925	4.17533	1.4581	4.17517	1.442	4.175	1.5316
4.1835	0.38535	4.1835	0.61775	4.18367	1.16005	4.18367	1.0013	4.18333	3.8521	4.18367	1.45465	4.1835	1.43705	4.18333	1.52765
4.19183	0.384	4.19183	0.61735	4.192	1.1562	4.192	0.995101	4.19167	3.8478	4.192	1.4513	4.19183	1.43425	4.19167	1.52085
4.20017	0.38225	4.20017	0.61535	4.20033	1.15025	4.20033	0.989301	4.2	3.8438	4.20033	1.44195	4.20017	1.4285	4.2	1.5177
4.2085	0.38265	4.2085	0.6177	4.20867	1.1458	4.20867	0.985401	4.20833	3.83975	4.20867	1.4372	4.2085	1.42195	4.20833	1.51045
4.21683	0.3804	4.21683	0.6171	4.217	1.1392	4.217	0.976501	4.21667	3.83445	4.217	1.42805	4.21683	1.41615	4.21667	1.5053
4.22517	0.37805	4.22517	0.61495	4.22533	1.13155	4.22533	0.973301	4.225	3.8303	4.22533	1.42245	4.22517	1.41015	4.225	1.4973
4.2335	0.37955	4.2335	0.6166	4.23367	1.12405	4.23367	0.965051	4.23333	3.82395	4.23367	1.4139	4.2335	1.40195	4.23333	1.48805
4.24183	0.37855	4.24183	0.6174	4.242	1.1207	4.242	0.964901	4.24167	3.81845	4.242	1.41025	4.24183	1.39865	4.24167	1.4779
4.25017	0.37635	4.25017	0.6157	4.25033	1.1114	4.25033	0.957251	4.25	3.8094	4.25033	1.3969	4.25017	1.38915	4.25	1.47325
4.2585	0.3761	4.2585	0.6167	4.25867	1.10325	4.25867	0.955301	4.25833	3.80385	4.25867	1.3915	4.2585	1.38155	4.25833	1.466
4.26683	0.37575	4.26683	0.61765	4.267	1.09855	4.267	0.952351	4.26667	3.7973	4.267	1.3853	4.26683	1.37685	4.26667	1.46195
4.27517	0.3769	4.27517	0.61785	4.27533	1.09345	4.27533	0.948051	4.275	3.78955	4.27533	1.37615	4.27517	1.37105	4.275	1.455
4.2835	0.37535	4.2835	0.6169	4.28367	1.08485	4.28367	0.943751	4.28333	3.7836	4.28367	1.371	4.2835	1.36455	4.28333	1.45005
4.29183	0.37765	4.29183	0.61905	4.292	1.08345	4.292	0.939251	4.29167	3.77665	4.292	1.36665	4.29183	1.3607	4.29167	1.444
4.30017	0.37785	4.30017	0.6216	4.30033	1.0779	4.30033	0.934551	4.3	3.77345	4.30033	1.36085	4.30017	1.35745	4.3	1.4359
4.3085	0.37485	4.3085	0.6199	4.30867	1.06875	4.30867	0.931201	4.30833	3.77235	4.30867	1.35365	4.3085	1.34985	4.30833	1.42975
4.31683	0.37515	4.31683	0.62025	4.317	1.06305	4.317	0.928351	4.31667	3.76875	4.317	1.34885	4.31683	1.3433	4.31667	1.42295
4.32517	0.3746	4.32517	0.6201	4.32533	1.0595	4.32533	0.923401	4.325	3.76535	4.32533	1.3426	4.32517	1.3406	4.325	1.41545
4.3335	0.3743	4.3335	0.6174	4.33367	1.0528	4.33367	0.919101	4.33333	3.7617	4.33367	1.33565	4.3335	1.3337	4.33333	1.41065
4.34183	0.3731	4.34183	0.6202	4.342	1.04315	4.342	0.913851	4.34167	3.7539	4.342	1.3292	4.34183	1.3267	4.34167	1.40065
4.35017	0.37115	4.35017	0.61775	4.35033	1.04005	4.35033	0.908601	4.35	3.7452	4.35033	1.3237	4.35017	1.3211	4.35	1.39435
4.3585	0.37225	4.3585	0.61755	4.35867	1.0354	4.35867	0.904201	4.35833	3.73235	4.35867	1.3175	4.3585	1.31425	4.35833	1.38465
4.36683	0.3706	4.36683	0.6188	4.367	1.0289	4.367	0.899351	4.36667	3.719	4.367	1.30975	4.36683	1.3079	4.36667	1.38065
4.37517	0.36825	4.37517	0.6185	4.37533	1.02195	4.37533	0.895251	4.375	3.7036	4.37533	1.30365	4.37517	1.3	4.375	1.3732
4.3835	0.3697	4.3835	0.61545	4.38367	1.01745	4.38367	0.893151	4.38333	3.6863	4.38367	1.2997	4.3835	1.29485	4.38333	1.3661
4.39183	0.36895	4.39183	0.6455	4.392	1.01315	4.392	0.886301	4.39167	3.66925	4.392	1.29345	4.39183	1.288	4.39167	1.35945
4.40017	0.36635	4.40017	0.6378	4.40033	1.00905	4.40033	0.885001	4.4	3.65315	4.40033	1.28685	4.40017	1.28315	4.4	1.35335
4.4085	0.36365	4.4085	0.61075	4.40867	1.0044	4.40867	0.881301	4.40833	3.63935	4.40867	1.28295	4.4085	1.2789	4.40833	1.34665
4.41683	0.3644	4.41683	0.60435	4.417	1.0016	4.417	0.875601	4.41667	3.6272	4.417	1.2787	4.41683	1.27525	4.41667	1.3409
4.42517	0.3621	4.42517	0.6166	4.42533	0.9975	4.42533	0.871801	4.425	3.61905	4.42533	1.27615	4.42517	1.2701	4.425	1.33625
4.4335	0.3615	4.4335	0.61745	4.43367	0.99295	4.43367	0.870501	4.43333	3.61425	4.43367	1.2696	4.4335	1.2645	4.43333	1.3337
4.44183	0.3604	4.44183	0.6165	4.442	0.9901	4.442	0.867251	4.44167	3.61125	4.442	1.26625	4.44183	1.2615	4.44167	1.3298
4.45017	0.3603	4.45017	0.61535	4.45033	0.9884	4.45033	0.865601	4.45	3.6094	4.45033	1.26555	4.45017	1.2597	4.45	1.32615
4.4585	0.35855	4.4585	0.61535	4.45867	0.98885	4.45867	0.860951	4.45833	3.60485	4.45867	1.26245	4.4585	1.2588	4.45833	1.3219
4.46683	0.3584	4.46683	0.61335	4.467	0.98515	4.467	0.859701	4.46667	3.6012	4.467	1.2619	4.46683	1.2573	4.46667	1.3197
4.47517	0.357	4.47517	0.6137	4.47533	0.98445	4.47533	0.854651	4.475	3.5932	4.47533	1.25855	4.47517	1.25315	4.475	1.3157
4.4835	0.3558	4.4835	0.61455	4.48367	0.9846	4.48367	0.853251	4.48333	3.5838	4.48367	1.2583	4.4835	1.2534	4.48333	1.31255
4.49183	0.35505	4.49183	0.61425	4.492	0.98185	4.492	0.849551	4.49167	3.5729	4.492	1.2542	4.49183	1.25005	4.49167	1.30885
4.50017	0.35545	4.50017	0.61665	4.50033	0.98175	4.50033	0.847001	4.5	3.56115	4.50033	1.25415	4.50017	1.24945	4.5	1.30785
4.5085	0.35645	4.5085	0.6168	4.50867	0.98165	4.50867	0.846851	4.50833	3.54885	4.50867	1.25295	4.5085	1.2481	4.50833	1.3058
4.51683	0.3546	4.51683	0.6188	4.517	0.97815	4.517	0.845101	4.51667	3.5361	4.517	1.2476	4.51683	1.24525	4.51667	1.3016
4.52517	0.35725	4.52517	0.6205	4.52533	0.97805	4.52533	0.842801	4.525	3.52395	4.52533	1.2439	4.52517	1.2447	4.525	1.2998
4.5335	0.3587	4.5335	0.6256	4.53367	0.9764	4.53367	0.841001	4.53333	3.5118	4.53367	1.23905	4.5335	1.243	4.53333	1.29515
4.54183	0.3694	4.54183	0.63325	4.542	0.97435	4.542	0.839201	4.54167	3.5012	4.542	1.23225	4.54183	1.23955	4.54167	1.2942
4.55017	0.3837	4.55017	0.64925	4.55033	0.97315	4.55033	0.840551	4.55	3.48815	4.55033	1.2209	4.55017	1.23895	4.55	1.29005
4.5585	0.41	4.5585	0.67505	4.55867	0.974	4.55867	0.838501	4.55833	3.4806	4.55867	1.3152	4.5585	1.23595	4.55833	1.29085
4.56683	0.4534	4.56683	0.7198	4.567	0.97355	4.567	0.843051	4.56667	3.46945	4.567	1.2969	4.56683	1.2361	4.56667	1.28765
4.57517	0.51605	4.57517	0.7837	4.57533	0.97355	4.57533	0.845201	4.575	3.46045	4.57533	1.22435	4.57517	1.2336	4.575	1.28805
4.5835	0.60405	4.5835	0.87315	4.58367	0.97665	4.58367	0.851551	4.58333	3.4501	4.58367	1.2225	4.5835	1.23325	4.58333	1.28685
4.59183	0.71675	4.59183	0.98945	4.592	0.9767	4.592	0.856651	4.59167	3.4415	4.592	1.22555	4.59183	1.2292	4.59167	1.2853
4.60017	0.8544	4.60017	1.1304	4.60033	0.9778	4.60033	0.865901	4.6	3.4318	4.60033	1.22535	4.60017	1.2286	4.6	1.286
4.6085	1.0121	4.6085	1.29355	4.60867	0.9798	4.60867	0.875751	4.60833	3.4228	4.60867	1.2345	4.6085	1.22785	4.60833	1.2828
4.61683	1.1933	4.61683	1.4768	4.617	0.98165	4.617	0.883751	4.61667	3.41585	4.617	1.2749	4.61683	1.22625	4.61667	1.2836
4.62517	1.41805	4.62517	1.69665	4.62533	0.98375	4.62533	0.890751	4.625	3.4102	4.62533	1.27645	4.62517	1.22545	4.625	1.2859
4.6335	1.7147	4.6335	1.971	4.63367	0.98395	4.63367	0.899101	4.63333	3.4056	4.63367	1.2211	4.6335	1.2238	4.63333	1.28765
4.64183	2.1322	4.64183	2.34475	4.642	0.9869	4.642	0.901151	4.64167	3.4006	4.642	1.21995	4.64183	1.22505	4.64167	1.28815
4.65017	2.7224	4.65017	2.859	4.65033	0.98425	4.65033	0.901351	4.65	3.39425	4.65033	1.22325	4.65017	1.2224	4.65	1.2913
4.6585	3.5162	4.6585	3.55565	4.65867	0.98265	4.65867	0.901401	4.65833	3.38875	4.65867	1.2245	4.6585	1.22295	4.65833	1.2909
4.66683	4.5166	4.66683	4.4474	4.667	0.9832	4.667	0.894251	4.66667	3.3844	4.667	1.22495	4.66683	1.22255	4.66667	1.29215
4.67517	5.663	4.67517	5.50165	4.67533	0.9821	4.67533	0.889251	4.675	3.38045	4.67533	1.2222	4.67517	1.2192	4.675	1.2929
4.6835	6.8308	4.6835	6.624	4.68367	0.9802	4.68367	0.881301	4.68333	3.37785	4.68367	1.22315	4.6835	1.22035	4.68333	1.2953
4.69183	7.88975	4.69183	7.68605	4.692	0.9783	4.692	0.874851	4.69167	3.37385	4.692	1.2204	4.69183	1.21585	4.69167	1.2942
4.70017	8.7006	4.70017	8.56195	4.70033	0.97245	4.70033	0.867101	4.7	3.36935	4.70033	1.2173	4.70017	1.2146	4.7	1.291
4.7085	9.1433	4.7085	9.14255	4.70867	0.97005	4.70867	0.858301	4.70833	3.3658	4.70867	1.21595	4.7085	1.21325	4.70833	1.29145
4.71683	9.2228	4.71683	9.37805	4.717	0.96725	4.717	0.852701	4.71667	3.36175	4.717	1.2134	4.71683	1.21335	4.71667	1.28675
4.72517	8.97225	4.72517	9.2816	4.72533	0.9658	4.72533	0.845701	4.725	3.35925	4.72533	1.2112	4.72517	1.21155	4.725	1.28405
4.7335	8.46155	4.7335	8.9096	4.73367	0.9651	4.73367	0.840501	4.73333	3.3549	4.73367	1.2143	4.7335	1.2113	4.73333	1.28285
4.74183	7.79615	4.74183	8.35105	4.742	0.96085	4.742	0.839351	4.74167	3.34795	4.742	1.23295	4.74183	1.20755	4.74167	1.28275
4.75017	7.0537	4.75017	7.67945	4.75033	0.9611	4.75033	0.841001	4.75	3.3419	4.75033	1.18855	4.75017	1.2078	4.75	1.28015
4.7585	6.3004	4.7585	6.9694	4.75867	0.961	4.75867	0.851051	4.75833	3.3344	4.75867	1.19425	4.7585	1.2091	4.75833	1.28625
4.76683	5.577	4.76683	6.2661	4.767	0.9634	4.767	0.867751	4.76667	3.32675	4.767	1.205	4.76683	1.2116	4.76667	1.2933
4.77517	4.90385	4.77517	5.59895	4.77533	0.969	4.77533	0.904201	4.775	3.3184	4.77533	1.2141	4.77517	1.21925	4.775	1.3126
4.7835	4.29225	4.7835	4.9762	4.78367	0.9792	4.78367	0.965351	4.78333	3.31045	4.78367	1.2286	4.7835	1.2286	4.78333	1.3434
4.79183	3.74155	4.79183	4.40735	4.792	0.99695	4.792	1.0552	4.79167	3.3027	4.792	1.253	4.79183	1.2487	4.79167	1.39745
4.80017	3.2573	4.80017	3.8999	4.80033	1.0343	4.80033	1.1985	4.8	3.29475	4.80033	1.29405	4.80017	1.29205	4.8	1.489
4.8085	2.83825	4.8085	3.4533	4.80867	1.0897	4.80867	1.39235	4.80833	3.28845	4.80867	1.35855	4.8085	1.3491	4.80833	1.63155
4.81683	2.47685	4.81683	3.05765	4.817	1.18345	4.817	1.65005	4.81667	3.28095	4.817	1.463	4.81683	1.44745	4.81667	1.8446
4.82517	2.176	4.82517	2.7229	4.82533	1.3208	4.82533	1.96025	4.825	3.2766	4.82533	1.61805	4.82517	1.5932	4.825	2.1382
4.8335	1.9314	4.8335	2.4406	4.83367	1.5162	4.83367	2.3211	4.83333	3.2698	4.83367	1.8358	4.8335	1.80025	4.83333	2.52255
4.84183	1.73205	4.84183	2.2023	4.842	1.7815	4.842	2.70185	4.84167	3.26465	4.842	2.13125	4.84183	2.0742	4.84167	2.99885
4.85017	1.57705	4.85017	2.0026	4.85033	2.1182	4.85033	3.071	4.85	3.2598	4.85033	2.5086	4.85017	2.42375	4.85	3.54955
4.8585	1.46185	4.8585	1.83525	4.85867	2.52085	4.85867	3.4006	4.85833	3.2563	4.85867	2.95675	4.8585	2.84195	4.85833	4.14485
4.86683	1.37785	4.86683	1.69435	4.867	2.9683	4.867	3.6605	4.86667	3.25515	4.867	3.45395	4.86683	3.3009	4.86667	4.7374
4.87517	1.31745	4.87517	1.5738	4.87533	3.4397	4.87533	3.8366	4.875	3.25195	4.87533	3.9713	4.87517	3.77475	4.875	5.28285
4.8835	1.2726	4.8835	1.4724	4.88367	3.89275	4.88367	3.92725	4.88333	3.25135	4.88367	4.46695	4.8835	4.231	4.88333	5.73235
4.89183	1.23185	4.89183	1.38765	4.892	4.2915	4.892	3.95415	4.89167	3.2528	4.892	4.89885	4.89183	4.6268	4.89167	6.0601
4.90017	1.19255	4.90017	1.31585	4.90033	4.61215	4.90033	3.9611	4.9	3.25145	4.90033	5.24265	4.90017	4.9356	4.9	6.2669
4.9085	1.14675	4.9085	1.2563	4.90867	4.83415	4.90867	4.0183	4.90833	3.25035	4.90867	5.4732	4.9085	5.1434	4.90833	6.3762
4.91683	1.09325	4.91683	1.2048	4.917	4.9591	4.917	4.2127	4.91667	3.2513	4.917	5.5988	4.91683	5.2526	4.91667	6.4567
4.92517	1.0356	4.92517	1.1639	4.92533	5.013	4.92533	4.6533	4.925	3.2537	4.92533	5.6471	4.92517	5.2917	4.925	6.60905
4.9335	0.9737	4.9335	1.12915	4.93367	5.0462	4.93367	5.4704	4.93333	3.2533	4.93367	5.6736	4.9335	5.31235	4.93333	6.9773
4.94183	0.91395	4.94183	1.09895	4.942	5.1291	4.942	6.7736	4.94167	3.25195	4.942	5.76365	4.94183	5.3979	4.94167	7.73745
4.95017	0.8583	4.95017	1.0767	4.95033	5.36075	4.95033	8.6394	4.95	3.25005	4.95033	6.02065	4.95017	5.64515	4.95	9.0865
4.9585	0.8049	4.9585	1.0574	4.95867	5.8554	4.95867	11.0627	4.95833	3.24815	4.95867	6.5754	4.9585	6.1728	4.95833	11.2063
4.96683	0.7583	4.96683	1.04455	4.967	6.7356	4.967	13.9388	4.96667	3.24465	4.967	7.55885	4.96683	7.10755	4.96667	14.2075
4.97517	0.71375	4.97517	1.0308	4.97533	8.11505	4.97533	17.0462	4.975	3.2388	4.97533	9.096	4.97517	8.557	4.975	18.0836
4.9835	0.67755	4.9835	1.0237	4.98367	10.0488	4.98367	20.0963	4.98333	3.2345	4.98367	11.2348	4.9835	10.5771	4.98333	22.6581
4.99183	0.64465	4.99183	1.01655	4.992	12.5321	4.992	22.7549	4.99167	3.2281	4.992	13.9663	4.99183	13.1412	4.99167	27.6007
5.00017	0.615	5.00017	1.01095	5.00033	15.4437	5.00033	24.762	5	3.2243	5.00033	17.1578	5.00017	16.1247	5	32.428
5.0085	0.58865	5.0085	1.00595	5.00867	18.5767	5.00867	25.9566	5.00833	3.2215	5.00867	20.5719	5.0085	19.3012	5.00833	36.6643
5.01683	0.56695	5.01683	1.0058	5.017	21.6484	5.017	26.2769	5.01667	3.2247	5.017	23.8983	5.01683	22.3756	5.01667	39.9096
5.02517	0.54395	5.02517	1.00195	5.02533	24.3707	5.02533	25.7958	5.025	3.239	5.02533	26.8345	5.02517	25.0589	5.025	41.9093
5.0335	0.5264	5.0335	1.00185	5.03367	26.4796	5.03367	24.6633	5.03333	3.2695	5.03367	29.086	5.0335	27.0839	5.03333	42.5827
5.04183	0.51235	5.04183	1.00495	5.042	27.823	5.042	23.0714	5.04167	3.32595	5.042	30.4846	5.04183	28.3031	5.04167	42.021
5.05017	0.4989	5.05017	1.0103	5.05033	28.325	5.05033	21.2005	5.05	3.42855	5.05033	30.9664	5.05017	28.6519	5.05	40.4442
5.0585	0.48785	5.0585	1.0165	5.05867	28.0415	5.05867	19.2278	5.05833	3.58895	5.05867	30.5824	5.0585	28.1957	5.05833	38.1069
5.06683	0.4763	5.06683	1.025	5.067	27.0726	5.067	17.2738	5.06667	3.83055	5.067	29.4633	5.06683	27.0543	5.06667	35.2863
5.07517	0.46595	5.07517	1.03335	5.07533	25.5851	5.07533	15.4236	5.075	4.1606	5.07533	27.799	5.07517	25.4248	5.075	32.2475
5.0835	0.4561	5.0835	1.04285	5.08367	23.765	5.08367	13.723	5.08333	4.5821	5.08367	25.7836	5.0835	23.4705	5.08333	29.1874
5.09183	0.44555	5.09183	1.05635	5.092	21.7765	5.092	12.1977	5.09167	5.0789	5.092	23.599	5.09183	21.3786	5.09167	26.2402
5.10017	0.43865	5.10017	1.0668	5.10033	19.7504	5.10033	10.8584	5.1	5.62445	5.10033	21.3887	5.10017	19.2886	5.1	23.4895
5.1085	0.43165	5.1085	1.0806	5.10867	17.7831	5.10867	9.70495	5.10833	6.1712	5.10867	19.2626	5.1085	17.2952	5.10833	20.9859
5.11683	0.4237	5.11683	1.0955	5.117	15.9463	5.117	8.7281	5.11667	6.67865	5.117	17.2881	5.11683	15.4591	5.11667	18.7596
5.12517	0.4165	5.12517	1.1128	5.12533	14.2789	5.12533	7.9149	5.125	7.11755	5.12533	15.5081	5.12517	13.8121	5.125	16.8173
5.1335	0.41245	5.1335	1.13225	5.13367	12.792	5.13367	7.2468	5.13333	7.5114	5.13367	13.9368	5.1335	12.3686	5.13333	15.1536
5.14183	0.4063	5.14183	1.15245	5.142	11.5003	5.142	6.6907	5.14167	7.9683	5.142	12.5767	5.14183	11.1293	5.14167	13.7512
5.15017	0.40415	5.15017	1.1775	5.15033	10.3946	5.15033	6.22165	5.15	8.7508	5.15033	11.4176	5.15017	10.0766	5.15	12.5863
5.1585	0.3997	5.1585	1.2074	5.15867	9.4665	5.15867	5.80605	5.15833	10.3699	5.15867	10.4519	5.1585	9.20295	5.15833	11.6123
5.16683	0.39615	5.16683	1.23625	5.167	8.68765	5.167	5.42465	5.16667	13.6966	5.167	9.63425	5.16683	8.479	5.16667	10.7919
5.17517	0.39155	5.17517	1.26765	5.17533	8.03985	5.17533	5.06025	5.175	20.0216	5.17533	8.9886	5.17517	7.87975	5.175	10.074
5.1835	0.38795	5.1835	1.30785	5.18367	7.486	5.18367	4.701	5.18333	30.9325	5.18367	8.38765	5.1835	7.3669	5.18333	9.42135
5.19183	0.38415	5.19183	1.34605	5.192	6.9959	5.192	4.3517	5.19167	47.8154	5.192	7.8623	5.19183	6.91615	5.19167	8.8046
5.20017	0.3812	5.20017	1.39005	5.20033	6.55025	5.20033	4.0149	5.2	71.1215	5.20033	7.37915	5.20017	6.4998	5.2	8.1975
5.2085	0.37965	5.2085	1.43795	5.20867	6.12605	5.20867	3.6927	5.20833	99.4611	5.20867	6.91845	5.2085	6.10135	5.20833	7.6086
5.21683	0.3749	5.21683	1.49075	5.217	5.71545	5.217	3.39225	5.21667	129.595	5.217	6.4663	5.21683	5.71205	5.21667	7.0373
5.22517	0.3731	5.22517	1.55105	5.22533	5.3173	5.22533	3.1163	5.225	158.259	5.22533	6.02445	5.22517	5.3304	5.225	6.4924
5.2335	0.369	5.2335	1.61365	5.23367	4.92875	5.23367	2.87105	5.23333	180.748	5.23367	5.59055	5.2335	4.958	5.23333	5.9795
5.24183	0.36545	5.24183	1.68335	5.242	4.55525	5.242	2.6503	5.24167	195.718	5.242	5.17275	5.24183	4.5992	5.24167	5.5118
5.25017	0.36265	5.25017	1.76095	5.25033	4.20405	5.25033	2.4571	5.25	203.154	5.25033	4.77505	5.25017	4.2603	5.25	5.0825
5.2585	0.36045	5.2585	1.8393	5.25867	3.877	5.25867	2.29	5.25833	203.833	5.25867	4.40925	5.2585	3.9494	5.25833	4.70125
5.26683	0.3579	5.26683	1.92695	5.267	3.577	5.267	2.14635	5.26667	199.049	5.267	4.0746	5.26683	3.6677	5.26667	4.36205
5.27517	0.3542	5.27517	2.01955	5.27533	3.3109	5.27533	2.0254	5.275	190.037	5.27533	3.77635	5.27517	3.41625	5.275	4.0699
5.2835	0.35515	5.2835	2.1187	5.28367	3.07565	5.28367	1.92425	5.28333	178.043	5.28367	3.5139	5.2835	3.19375	5.28333	3.8175
5.29183	0.3519	5.29183	2.22235	5.292	2.87265	5.292	1.8385	5.29167	164.105	5.292	3.2868	5.29183	3.00505	5.29167	3.6034
5.30017	0.35485	5.30017	2.338	5.30033	2.69735	5.30033	1.76385	5.3	149.133	5.30033	3.0937	5.30017	2.84665	5.3	3.42625
5.3085	0.3574	5.3085	2.4745	5.30867	2.55075	5.30867	1.69855	5.30833	133.84	5.30867	2.92915	5.3085	2.7099	5.30833	3.2777
5.31683	0.3591	5.31683	2.67025	5.317	2.4285	5.317	1.6364	5.31667	118.847	5.317	2.7929	5.31683	2.59825	5.31667	3.14645
5.32517	0.36355	5.32517	2.99665	5.32533	2.3215	5.32533	1.5849	5.325	104.597	5.32533	2.6755	5.32517	2.5028	5.325	3.03315
5.3335	0.3737	5.3335	3.58675	5.33367	2.2308	5.33367	1.5287	5.33333	91.442	5.33367	2.5732	5.3335	2.41975	5.33333	2.93105
5.34183	0.3805	5.34183	4.6113	5.342	2.1491	5.342	1.47885	5.34167	79.4823	5.342	2.4801	5.34183	2.3423	5.34167	2.83335
5.35017	0.39025	5.35017	6.2498	5.35033	2.07145	5.35033	1.4301	5.35	68.9202	5.35033	2.3977	5.35017	2.26845	5.35	2.7418
5.3585	0.4018	5.3585	8.62125	5.35867	2.0029	5.35867	1.3891	5.35833	59.77	5.35867	2.31705	5.3585	2.20155	5.35833	2.6518
5.36683	0.4158	5.36683	11.7106	5.367	1.9342	5.367	1.34615	5.36667	51.9543	5.367	2.24235	5.36683	2.1365	5.36667	2.56905
5.37517	0.4318	5.37517	15.3458	5.37533	1.86985	5.37533	1.3099	5.375	45.3574	5.37533	2.16935	5.37517	2.07565	5.375	2.49235
5.3835	0.44865	5.3835	19.2499	5.38367	1.8103	5.38367	1.2731	5.38333	39.8516	5.38367	2.1027	5.3835	2.01655	5.38333	2.42185
5.39183	0.4778	5.39183	23.1273	5.392	1.758	5.392	1.24325	5.39167	35.2711	5.392	2.0434	5.39183	1.9663	5.39167	2.35475
5.40017	0.50935	5.40017	26.6875	5.40033	1.70875	5.40033	1.2154	5.4	31.4422	5.40033	1.9888	5.40017	1.9176	5.4	2.29375
5.4085	0.55695	5.4085	29.7688	5.40867	1.66645	5.40867	1.18925	5.40833	27.764	5.40867	1.9424	5.4085	1.8757	5.40833	2.23645
5.41683	0.6194	5.41683	32.2833	5.417	1.6275	5.417	1.1656	5.41667	24.8874	5.417	1.8987	5.41683	1.8385	5.41667	2.1858
5.42517	0.69845	5.42517	34.2293	5.42533	1.59125	5.42533	1.14545	5.425	22.5599	5.42533	1.8595	5.42517	1.80425	5.425	2.13845
5.4335	0.7878	5.4335	35.6277	5.43367	1.5625	5.43367	1.12635	5.43333	20.5609	5.43367	1.8256	5.4335	1.77485	5.43333	2.0972
5.44183	0.8765	5.44183	36.5391	5.442	1.5352	5.442	1.1096	5.44167	18.8277	5.442	1.7938	5.44183	1.74645	5.44167	2.05905
5.45017	0.95505	5.45017	37.0091	5.45033	1.51135	5.45033	1.0941	5.45	17.3088	5.45033	1.76415	5.45017	1.7225	5.45	2.02295
5.4585	1.01525	5.4585	37.0968	5.45867	1.4904	5.45867	1.07985	5.45833	15.9647	5.45867	1.7414	5.4585	1.703	5.45833	1.99165
5.46683	1.05345	5.46683	36.8464	5.467	1.4695	5.467	1.0701	5.46667	14.7707	5.467	1.7185	5.46683	1.6826	5.46667	1.96905
5.47517	1.06865	5.47517	36.3176	5.47533	1.4546	5.47533	1.05825	5.475	13.7067	5.47533	1.69975	5.47517	1.6674	5.475	1.9425
5.4835	1.0649	5.4835	35.5566	5.48367	1.4371	5.48367	1.0495	5.48333	12.7584	5.48367	1.68135	5.4835	1.65145	5.48333	1.9239
5.49183	1.04925	5.49183	34.6358	5.492	1.42425	5.492	1.0374	5.49167	11.9095	5.492	1.6649	5.49183	1.6392	5.49167	1.90615
5.50017	1.02685	5.50017	33.5943	5.50033	1.4116	5.50033	1.02785	5.5	11.1547	5.50033	1.6491	5.50017	1.625	5.5	1.8875
5.5085	1.0034	5.5085	32.4804	5.50867	1.39885	5.50867	1.0189	5.50833	10.4792	5.50867	1.6352	5.5085	1.61355	5.50833	1.87625
5.51683	0.97555	5.51683	31.3215	5.517	1.38905	5.517	1.01005	5.51667	9.8795	5.517	1.62025	5.51683	1.60195	5.51667	1.8664
5.52517	0.9476	5.52517	30.1492	5.52533	1.3766	5.52533	1.00205	5.525	9.34205	5.52533	1.6066	5.52517	1.5906	5.525	1.85325
5.5335	0.92005	5.5335	28.977	5.53367	1.3665	5.53367	0.995101	5.53333	8.8593	5.53367	1.59205	5.5335	1.57935	5.53333	1.8389
5.54183	0.88855	5.54183	27.8234	5.542	1.36	5.542	0.986151	5.54167	8.42815	5.542	1.5845	5.54183	1.57235	5.54167	1.82975
5.55017	0.8595	5.55017	26.7031	5.55033	1.36315	5.55033	0.980351	5.55	8.0404	5.55033	1.5766	5.55017	1.56865	5.55	1.81975
5.5585	0.83185	5.5585	25.612	5.55867	1.3492	5.55867	0.972551	5.55833	7.69165	5.55867	1.57125	5.5585	1.5646	5.55833	1.8138
5.56683	0.80465	5.56683	24.5395	5.567	1.35075	5.567	0.968101	5.56667	7.38135	5.567	1.5701	5.56683	1.56645	5.56667	1.809
5.57517	0.7789	5.57517	23.4998	5.57533	1.3574	5.57533	0.962601	5.575	7.0933	5.57533	1.57505	5.57517	1.5726	5.575	1.80285
5.5835	0.7574	5.5835	22.5028	5.58367	1.36955	5.58367	0.960401	5.58333	6.84455	5.58367	1.5858	5.5835	1.5867	5.58333	1.80065
5.59183	0.7364	5.59183	21.5439	5.592	1.3876	5.592	0.954301	5.59167	6.6195	5.592	1.6036	5.59183	1.60665	5.59167	1.7972
5.60017	0.7215	5.60017	20.6317	5.60033	1.413	5.60033	0.952801	5.6	6.40875	5.60033	1.62985	5.60017	1.6351	5.6	1.79905
5.6085	0.70505	5.6085	19.7587	5.60867	1.44065	5.60867	0.949051	5.60833	6.2135	5.60867	1.6584	5.6085	1.6616	5.60833	1.8004
5.61683	0.68815	5.61683	18.9316	5.617	1.4665	5.617	0.944651	5.61667	6.0319	5.617	1.6901	5.61683	1.69005	5.61667	1.8024
5.62517	0.67615	5.62517	18.1397	5.62533	1.49765	5.62533	0.942651	5.625	5.86165	5.62533	1.7169	5.62517	1.7153	5.625	1.80795
5.6335	0.6638	5.6335	17.3879	5.63367	1.52115	5.63367	0.942801	5.63333	5.70155	5.63367	1.7389	5.6335	1.7342	5.63333	1.81115
5.64183	0.65215	5.64183	16.6704	5.642	1.5377	5.642	0.938651	5.64167	5.55005	5.642	1.757	5.64183	1.7496	5.64167	1.81475
5.65017	0.6436	5.65017	15.9931	5.65033	1.54565	5.65033	0.936051	5.65	5.40815	5.65033	1.7635	5.65017	1.75275	5.65	1.81805
5.6585	0.6328	5.6585	15.3537	5.65867	1.5486	5.65867	0.934601	5.65833	5.27835	5.65867	1.76365	5.6585	1.74865	5.65833	1.8206
5.66683	0.62415	5.66683	14.8018	5.667	1.54405	5.667	0.933501	5.66667	5.1613	5.667	1.7542	5.66683	1.7408	5.66667	1.81915
5.67517	0.6188	5.67517	14.1966	5.67533	1.53575	5.67533	0.931651	5.675	5.04945	5.67533	1.7428	5.67517	1.7288	5.675	1.81835
5.6835	0.6131	5.6835	13.6388	5.68367	1.5222	5.68367	0.931151	5.68333	4.9513	5.68367	1.7255	5.6835	1.71115	5.68333	1.8193
5.69183	0.60685	5.69183	13.1254	5.692	1.5097	5.692	0.932151	5.69167	4.8586	5.692	1.70885	5.69183	1.6967	5.69167	1.8206
5.70017	0.60145	5.70017	12.645	5.70033	1.49655	5.70033	0.930751	5.7	4.7768	5.70033	1.693	5.70017	1.682	5.7	1.8218
5.7085	0.5998	5.7085	12.1895	5.70867	1.48375	5.70867	0.932401	5.70833	4.6989	5.70867	1.6746	5.7085	1.6688	5.70833	1.82405
5.71683	0.5943	5.71683	11.7545	5.717	1.4713	5.717	0.935351	5.71667	4.6276	5.717	1.6579	5.71683	1.6541	5.71667	1.82865
5.72517	0.59285	5.72517	11.346	5.72533	1.4617	5.72533	0.938501	5.725	4.5567	5.72533	1.6472	5.72517	1.6481	5.725	1.83275
5.7335	0.5889	5.7335	10.9606	5.73367	1.45575	5.73367	0.941751	5.73333	4.49155	5.73367	1.6402	5.7335	1.6328	5.73333	1.8414
5.74183	0.58445	5.74183	10.599	5.742	1.4549	5.742	0.949501	5.74167	4.42795	5.742	1.6345	5.74183	1.637	5.74167	1.8526
5.75017	0.58115	5.75017	10.2493	5.75033	1.453	5.75033	0.954951	5.75	4.3695	5.75033	1.62985	5.75017	1.62395	5.75	1.8662
5.7585	0.5766	5.7585	9.91435	5.75867	1.4563	5.75867	0.963651	5.75833	4.31005	5.75867	1.62985	5.7585	1.6517	5.75833	1.8824
5.76683	0.5712	5.76683	9.59565	5.767	1.463	5.767	0.973001	5.76667	4.26025	5.767	1.6331	5.76683	1.6668	5.76667	1.9011
5.77517	0.56565	5.77517	9.2943	5.77533	1.47125	5.77533	0.983101	5.775	4.2169	5.77533	1.63955	5.77517	1.6485	5.775	1.92405
5.7835	0.5601	5.7835	9.00495	5.78367	1.48335	5.78367	0.995151	5.78333	4.1825	5.78367	1.64825	5.7835	1.65955	5.78333	1.9554
5.79183	0.55265	5.79183	8.7333	5.792	1.5001	5.792	1.0069	5.79167	4.15255	5.792	1.65615	5.79183	1.66505	5.79167	1.97955
5.80017	0.54625	5.80017	8.4756	5.80033	1.51925	5.80033	1.01865	5.8	4.13195	5.80033	1.69865	5.80017	1.7077	5.8	2.0098
5.8085	0.5405	5.8085	8.2288	5.80867	1.53755	5.80867	1.02805	5.80833	4.1181	5.80867	1.70355	5.8085	1.72715	5.80833	2.0431
5.81683	0.53405	5.81683	7.9922	5.817	1.5633	5.817	1.03855	5.81667	4.1045	5.817	1.71735	5.81683	1.72215	5.81667	2.07575
5.82517	0.5282	5.82517	7.768	5.82533	1.58565	5.82533	1.0478	5.825	4.09325	5.82533	1.7399	5.82517	1.75375	5.825	2.1081
5.8335	0.5246	5.8335	7.55575	5.83367	1.61085	5.83367	1.05595	5.83333	4.08215	5.83367	1.76345	5.8335	1.77155	5.83333	2.14265
5.84183	0.51785	5.84183	7.35145	5.842	1.64025	5.842	1.06175	5.84167	4.0698	5.842	1.78825	5.84183	1.7924	5.84167	2.17275
5.85017	0.51225	5.85017	7.15505	5.85033	1.66665	5.85033	1.0693	5.85	4.059	5.85033	1.81165	5.85017	1.81235	5.85	2.20195
5.8585	0.5066	5.8585	6.9661	5.85867	1.69105	5.85867	1.07445	5.85833	4.0486	5.85867	1.83225	5.8585	1.8305	5.85833	2.2296
5.86683	0.49825	5.86683	6.7801	5.867	1.71695	5.867	1.07935	5.86667	4.03795	5.867	1.8535	5.86683	1.8507	5.86667	2.25895
5.87517	0.4937	5.87517	6.602	5.87533	1.74145	5.87533	1.08765	5.875	4.02915	5.87533	1.87165	5.87517	1.8667	5.875	2.28845
5.8835	0.48735	5.8835	6.42935	5.88367	1.7649	5.88367	1.09595	5.88333	4.02125	5.88367	1.89245	5.8835	1.8842	5.88333	2.3142
5.89183	0.4831	5.89183	6.2639	5.892	1.7884	5.892	1.1029	5.89167	4.01375	5.892	1.9083	5.89183	1.9007	5.89167	2.3418
5.90017	0.48205	5.90017	6.10405	5.90033	1.8128	5.90033	1.1127	5.9	4.0052	5.90033	1.92685	5.90017	1.9214	5.9	2.37175
5.9085	0.47865	5.9085	5.94925	5.90867	1.84055	5.90867	1.12295	5.90833	3.9936	5.90867	1.94825	5.9085	1.94355	5.90833	2.40475
5.91683	0.4758	5.91683	5.80505	5.917	1.87025	5.917	1.1366	5.91667	3.984	5.917	1.97185	5.91683	1.96915	5.91667	2.44005
5.92517	0.472	5.92517	5.6643	5.92533	1.90345	5.92533	1.15345	5.925	3.9743	5.92533	1.99645	5.92517	1.9981	5.925	2.4786
5.9335	0.46985	5.9335	5.53265	5.93367	1.94015	5.93367	1.16645	5.93333	3.96615	5.93367	2.026	5.9335	2.03675	5.93333	2.5236
5.94183	0.46805	5.94183	5.40405	5.942	1.98235	5.942	1.1827	5.94167	3.96185	5.942	2.05765	5.94183	2.07755	5.94167	2.5722
5.95017	0.46745	5.95017	5.28095	5.95033	2.03145	5.95033	1.2026	5.95	3.96025	5.95033	2.099	5.95017	2.1242	5.95	2.6258
5.9585	0.46275	5.9585	5.16205	5.95867	2.0833	5.95867	1.2204	5.95833	3.962	5.95867	2.13945	5.9585	2.17215	5.95833	2.68195
5.96683	0.45965	5.96683	5.05055	5.967	2.14295	5.967	1.2365	5.96667	3.96625	5.967	2.1845	5.96683	2.22545	5.96667	2.74455
5.97517	0.4559	5.97517	4.9421	5.97533	2.20635	5.97533	1.2558	5.975	3.9708	5.97533	2.2364	5.97517	2.29815	5.975	2.8118
5.9835	0.45405	5.9835	4.83965	5.98367	2.27555	5.98367	1.2741	5.98333	3.9776	5.98367	2.28925	5.9835	2.38225	5.98333	2.88385
5.99183	0.44915	5.99183	4.7392	5.992	2.3426	5.992	1.2934	5.99167	3.9767	5.992	2.3432	5.99183	2.41025	5.99167	2.9614
6.00017	0.44645	6.00017	4.6429	6.00033	2.4143	6.00033	1.31815	6	3.9734	6.00033	2.3981	6.00017	2.4844	6	3.04115
6.0085	0.44255	6.0085	4.5484	6.00867	2.48345	6.00867	1.3485	6.00833	3.9659	6.00867	2.4545	6.0085	2.54655	6.00833	3.1322
6.01683	0.44065	6.01683	4.458	6.017	2.5533	6.017	1.39285	6.01667	3.9525	6.017	2.5066	6.01683	2.60815	6.01667	3.2379
6.02517	0.4375	6.02517	4.37075	6.02533	2.6262	6.02533	1.47515	6.025	3.93485	6.02533	2.56455	6.02517	2.6705	6.025	3.3838
6.0335	0.43495	6.0335	4.28715	6.03367	2.71015	6.03367	1.6406	6.03333	3.91605	6.03367	2.63135	6.0335	2.74545	6.03333	3.59835
6.04183	0.4333	6.04183	4.20795	6.042	2.81635	6.042	1.9583	6.04167	3.8985	6.042	2.7145	6.04183	2.842	6.04167	3.94995
6.05017	0.4316	6.05017	4.1307	6.05033	2.9771	6.05033	2.5205	6.05	3.8818	6.05033	2.83735	6.05017	2.99585	6.05	4.5219
6.0585	0.42925	6.0585	4.0569	6.05867	3.25015	6.05867	3.4077	6.05833	3.8695	6.05867	3.04925	6.0585	3.26945	6.05833	5.44065
6.06683	0.43285	6.06683	3.98725	6.067	3.71075	6.067	4.6545	6.06667	3.861	6.067	3.40995	6.06683	3.75235	6.06667	6.81945
6.07517	0.43535	6.07517	3.9239	6.07533	4.46295	6.07533	6.2377	6.075	3.8567	6.07533	4.01705	6.07517	4.56225	6.075	8.75595
6.0835	0.44285	6.0835	3.86155	6.08367	5.6059	6.08367	8.10465	6.08333	3.85775	6.08367	4.95555	6.0835	5.8058	6.08333	11.2778
6.09183	0.45425	6.09183	3.8064	6.092	7.2199	6.092	10.1569	6.09167	3.85885	6.092	6.3035	6.09183	7.5585	6.09167	14.3385
6.10017	0.46485	6.10017	3.75615	6.10033	9.3186	6.10033	12.2897	6.1	3.86625	6.10033	8.0885	6.10017	9.82265	6.1	17.8135
6.1085	0.4839	6.1085	3.7148	6.10867	11.8645	6.10867	14.4061	6.10833	3.87915	6.10867	10.2701	6.1085	12.536	6.10833	21.5209
6.11683	0.50665	6.11683	3.67585	6.117	14.7477	6.117	16.3883	6.11667	3.89325	6.117	12.7713	6.11683	15.5777	6.11667	25.2575
6.12517	0.53185	6.12517	3.643	6.12533	17.8187	6.12533	18.1728	6.125	3.9117	6.12533	15.4585	6.12517	18.7792	6.125	28.8204
6.1335	0.5596	6.1335	3.61625	6.13367	20.9017	6.13367	19.7083	6.13333	3.93515	6.13367	18.1931	6.1335	21.9706	6.13333	32.0403
6.14183	0.58555	6.14183	3.58925	6.142	23.8477	6.142	20.9819	6.14167	3.9606	6.142	20.8342	6.14183	24.9895	6.14167	34.8263
6.15017	0.60885	6.15017	3.56435	6.15033	26.5112	6.15033	21.9847	6.15	3.9844	6.15033	23.2721	6.15017	27.7049	6.15	37.1204
6.1585	0.62765	6.1585	3.5382	6.15867	28.8126	6.15867	22.7388	6.15833	4.0077	6.15867	25.4167	6.1585	30.0394	6.15833	38.9098
6.16683	0.6429	6.16683	3.50985	6.167	30.6867	6.167	23.2599	6.16667	4.02185	6.167	27.2105	6.16683	31.9432	6.16667	40.2293
6.17517	0.64785	6.17517	3.47605	6.17533	32.1465	6.17533	23.5681	6.175	4.0366	6.17533	28.6386	6.17517	33.416	6.175	41.1166
6.1835	0.6464	6.1835	3.43695	6.18367	33.219	6.18367	23.6901	6.18333	4.04405	6.18367	29.7093	6.1835	34.4815	6.18333	41.6118
6.19183	0.63555	6.19183	3.39025	6.192	33.9034	6.192	23.6625	6.19167	4.04565	6.192	30.4464	6.19183	35.1839	6.19167	41.779
6.20017	0.62	6.20017	3.3383	6.20033	34.2567	6.20033	23.5055	6.2	4.0438	6.20033	30.8925	6.20017	35.5712	6.2	41.6531
6.2085	0.6006	6.2085	3.28555	6.20867	34.3368	6.20867	23.2492	6.20833	4.0462	6.20867	31.0818	6.2085	35.657	6.20833	41.2835
6.21683	0.5777	6.21683	3.22855	6.217	34.1946	6.217	22.9153	6.21667	4.05805	6.217	31.0594	6.21683	35.5231	6.21667	40.7265
6.22517	0.55435	6.22517	3.1701	6.22533	33.8616	6.22533	22.5331	6.225	4.10905	6.22533	30.8605	6.22517	35.2161	6.225	40.016
6.2335	0.53085	6.2335	3.11015	6.23367	33.4044	6.23367	22.1137	6.23333	4.23985	6.23367	30.5383	6.2335	34.7806	6.23333	39.2021
6.24183	0.50795	6.24183	3.05465	6.242	32.861	6.242	21.6764	6.24167	4.517	6.242	30.1218	6.24183	34.2537	6.24167	38.3159
6.25017	0.4883	6.25017	2.99925	6.25033	32.2542	6.25033	21.2251	6.25	5.01005	6.25033	29.6608	6.25017	33.6968	6.25	37.3994
6.2585	0.47105	6.2585	2.9492	6.25867	31.6124	6.25867	20.7673	6.25833	5.7809	6.25867	29.1639	6.2585	33.1152	6.25833	36.4772
6.26683	0.45465	6.26683	2.8989	6.267	30.981	6.267	20.2936	6.26667	6.85355	6.267	28.6693	6.26683	32.534	6.26667	35.5769
6.27517	0.44175	6.27517	2.85295	6.27533	30.3523	6.27533	19.7997	6.275	8.20625	6.27533	28.1901	6.27517	31.9542	6.275	34.7028
6.2835	0.4265	6.2835	2.8078	6.28367	29.74	6.28367	19.2859	6.28333	9.76185	6.28367	27.7224	6.2835	31.3844	6.28333	33.8533
6.29183	0.419	6.29183	2.7705	6.292	29.1172	6.292	18.7486	6.29167	11.4247	6.292	27.2298	6.29183	30.7843	6.29167	33.0201
6.30017	0.4082	6.30017	2.7307	6.30033	28.4822	6.30033	18.177	6.3	13.0905	6.30033	26.6993	6.30017	30.1513	6.3	32.2077
6.3085	0.40015	6.3085	2.69535	6.30867	27.8019	6.30867	17.5777	6.30833	14.6723	6.30867	26.1286	6.3085	29.4525	6.30833	31.3824
6.31683	0.3942	6.31683	2.6599	6.317	27.0632	6.317	16.9715	6.31667	16.1023	6.317	25.4868	6.31683	28.6824	6.31667	30.5094
6.32517	0.3883	6.32517	2.62605	6.32533	26.274	6.32533	16.3612	6.325	17.3507	6.32533	24.7828	6.32517	27.8484	6.325	29.5945
6.3335	0.38465	6.3335	2.59565	6.33367	25.4331	6.33367	15.7583	6.33333	18.4021	6.33367	24.0203	6.3335	26.9595	6.33333	28.6576
6.34183	0.3804	6.34183	2.56455	6.342	24.5464	6.342	15.1646	6.34167	19.2573	6.342	23.2162	6.34183	26.0317	6.34167	27.6987
6.35017	0.37465	6.35017	2.53575	6.35033	23.6431	6.35033	14.5959	6.35	19.9437	6.35033	22.3755	6.35017	25.0886	6.35	26.7322
6.3585	0.37085	6.3585	2.50785	6.35867	22.7443	6.35867	14.0434	6.35833	20.4923	6.35867	21.5343	6.3585	24.1529	6.35833	25.7763
6.36683	0.36765	6.36683	2.482	6.367	21.8559	6.367	13.5129	6.36667	20.9366	6.367	20.6948	6.36683	23.2266	6.36667	24.8457
6.37517	0.36495	6.37517	2.4557	6.37533	21.0035	6.37533	13.0075	6.375	21.2941	6.37533	19.8819	6.37517	22.3313	6.375	23.9357
6.3835	0.363	6.3835	2.43095	6.38367	20.1729	6.38367	12.5276	6.38333	21.5829	6.38367	19.0996	6.3835	21.4757	6.38333	23.0658
6.39183	0.3604	6.39183	2.4056	6.392	19.3822	6.392	12.0676	6.39167	21.8112	6.392	18.3546	6.39183	20.6554	6.39167	22.2344
6.40017	0.35755	6.40017	2.38065	6.40033	18.6304	6.40033	11.6314	6.4	21.9804	6.40033	17.6471	6.40017	19.8673	6.4	21.4474
6.4085	0.3587	6.4085	2.35955	6.40867	17.9266	6.40867	11.2206	6.40833	22.0992	6.40867	16.983	6.4085	19.1267	6.40833	20.6977
6.41683	0.35645	6.41683	2.3358	6.417	17.2565	6.417	10.8273	6.41667	22.184	6.417	16.3547	6.41683	18.4298	6.41667	19.9906
6.42517	0.358	6.42517	2.31295	6.42533	16.6343	6.42533	10.4531	6.425	22.271	6.42533	15.7665	6.42517	17.7721	6.425	19.3234
6.4335	0.356	6.4335	2.28945	6.43367	16.0468	6.43367	10.1011	6.43333	22.3949	6.43367	15.2133	6.4335	17.1529	6.43333	18.6928
6.44183	0.3577	6.44183	2.27135	6.442	15.4947	6.442	9.7636	6.44167	22.6117	6.442	14.6944	6.44183	16.5747	6.44167	18.0922
6.45017	0.355	6.45017	2.24835	6.45033	14.9718	6.45033	9.44365	6.45	22.9189	6.45033	14.2086	6.45017	16.0272	6.45	17.5222
6.4585	0.3539	6.4585	2.2284	6.45867	14.4837	6.45867	9.1351	6.45833	23.3054	6.45867	13.7581	6.4585	15.5096	6.45833	16.9874
6.46683	0.351	6.46683	2.20675	6.467	14.0236	6.467	8.8443	6.46667	23.694	6.467	13.338	6.46683	15.0222	6.46667	16.4752
6.47517	0.3512	6.47517	2.1855	6.47533	13.588	6.47533	8.5656	6.475	23.9819	6.47533	12.9436	6.47517	14.5577	6.475	15.9906
6.4835	0.3499	6.4835	2.1639	6.48367	13.1738	6.48367	8.3019	6.48333	24.0894	6.48367	12.5627	6.4835	14.1174	6.48333	15.5307
6.49183	0.34735	6.49183	2.14275	6.492	12.785	6.492	8.04295	6.49167	23.938	6.492	12.207	6.49183	13.7023	6.49167	15.0942
6.50017	0.34525	6.50017	2.1228	6.50033	12.4083	6.50033	7.7951	6.5	23.4871	6.50033	11.8648	6.50017	13.2993	6.5	14.6767
6.5085	0.344	6.5085	2.10255	6.50867	12.0539	6.50867	7.55995	6.50833	22.761	6.50867	11.5406	6.5085	12.9186	6.50833	14.2692
6.51683	0.34105	6.51683	2.0799	6.517	11.7117	6.517	7.3363	6.51667	21.8131	6.517	11.2304	6.51683	12.5556	6.51667	13.8832
6.52517	0.342	6.52517	2.06395	6.52533	11.3864	6.52533	7.12015	6.525	20.7207	6.52533	10.9359	6.52517	12.2059	6.525	13.5166
6.5335	0.33915	6.5335	2.043	6.53367	11.0718	6.53367	6.91515	6.53333	19.5648	6.53367	10.6509	6.5335	11.869	6.53333	13.1875
6.54183	0.3375	6.54183	2.02335	6.542	10.7696	6.542	6.7193	6.54167	18.4215	6.542	10.3772	6.54183	11.5518	6.54167	12.9639
6.55017	0.337	6.55017	2.0045	6.55033	10.4826	6.55033	6.5303	6.55	17.3589	6.55033	10.111	6.55017	11.2442	6.55	12.4268
6.5585	0.3373	6.5585	1.9867	6.55867	10.2073	6.55867	6.3499	6.55833	16.4058	6.55867	9.8554	6.5585	10.9473	6.55833	12.2028
6.56683	0.33415	6.56683	1.96715	6.567	9.943	6.567	6.179	6.56667	15.588	6.567	9.61115	6.56683	10.6677	6.56667	11.9177
6.57517	0.3336	6.57517	1.9489	6.57533	9.68175	6.57533	6.01385	6.575	14.9134	6.57533	9.36995	6.57517	10.4	6.575	11.622
6.5835	0.3297	6.5835	1.9296	6.58367	9.4344	6.58367	5.85645	6.58333	14.3798	6.58367	9.1419	6.5835	10.1386	6.58333	11.3456
6.59183	0.32765	6.59183	1.9109	6.592	9.19755	6.592	5.7078	6.59167	13.966	6.592	8.9194	6.59183	9.8864	6.59167	11.0834
6.60017	0.32955	6.60017	1.89575	6.60033	8.96805	6.60033	5.56495	6.6	13.6578	6.60033	8.70485	6.60017	9.648	6.6	10.8316
6.6085	0.32945	6.6085	1.8784	6.60867	8.7492	6.60867	5.42805	6.60833	13.4161	6.60867	8.49845	6.6085	9.41875	6.60833	10.5922
6.61683	0.3248	6.61683	1.8611	6.617	8.54225	6.617	5.29915	6.61667	13.2079	6.617	8.3027	6.61683	9.1987	6.61667	10.3642
6.62517	0.32435	6.62517	1.8434	6.62533	8.3409	6.62533	5.1728	6.625	13	6.62533	8.1103	6.62517	8.9886	6.625	10.1435
6.6335	0.3241	6.6335	1.82745	6.63367	8.14715	6.63367	5.0516	6.63333	12.772	6.63367	7.92525	6.6335	8.78935	6.63333	9.93285
6.64183	0.3237	6.64183	1.8098	6.642	7.96075	6.642	4.93925	6.64167	12.5068	6.642	7.74855	6.64183	8.5927	6.64167	9.73195
6.65017	0.3247	6.65017	1.7942	6.65033	7.7818	6.65033	4.82955	6.65	12.199	6.65033	7.5616	6.65017	8.40645	6.65	9.54095
6.6585	0.32355	6.6585	1.7784	6.65867	7.6066	6.65867	4.72255	6.65833	11.8456	6.65867	7.33285	6.6585	8.2345	6.65833	9.35395
6.66683	0.32505	6.66683	1.76445	6.667	7.441	6.667	4.62005	6.66667	11.462	6.667	7.2807	6.66683	8.04175	6.66667	9.1766
6.67517	0.32215	6.67517	1.74725	6.67533	7.29395	6.67533	4.5251	6.675	11.066	6.67533	7.1158	6.67517	7.83205	6.675	9.0069
6.6835	0.322	6.6835	1.73265	6.68367	7.1327	6.68367	4.4285	6.68333	10.6682	6.68367	6.95595	6.6835	7.67085	6.68333	8.84555
6.69183	0.3198	6.69183	1.71475	6.692	6.97815	6.692	4.33495	6.69167	10.2783	6.692	6.78565	6.69183	7.5651	6.69167	8.6874
6.70017	0.31945	6.70017	1.70135	6.70033	6.8343	6.70033	4.2455	6.7	9.9116	6.70033	6.6341	6.70017	7.39405	6.7	8.53095
6.7085	0.31565	6.7085	1.68615	6.70867	6.6948	6.70867	4.16085	6.70833	9.57335	6.70867	6.6524	6.7085	7.3407	6.70833	8.38265
6.71683	0.3152	6.71683	1.67285	6.717	6.5573	6.717	4.0762	6.71667	9.26	6.717	6.46165	6.71683	7.1621	6.71667	8.23775
6.72517	0.31135	6.72517	1.65575	6.72533	6.42615	6.72533	3.9945	6.725	8.98055	6.72533	6.33225	6.72517	6.9923	6.725	8.09715
6.7335	0.3109	6.7335	1.6439	6.73367	6.2998	6.73367	3.916	6.73333	8.7319	6.73367	6.18155	6.7335	6.8572	6.73333	7.96265
6.74183	0.30865	6.74183	1.6301	6.742	6.1823	6.742	3.8416	6.74167	8.51535	6.742	6.08475	6.74183	6.74255	6.74167	7.8322
6.75017	0.30825	6.75017	1.61645	6.75033	6.06945	6.75033	3.7628	6.75	8.32375	6.75033	5.98925	6.75017	6.62605	6.75	7.70535
6.7585	0.3051	6.7585	1.6026	6.75867	5.96405	6.75867	3.6926	6.75833	8.15745	6.75867	5.88125	6.7585	6.5155	6.75833	7.58425
6.76683	0.3043	6.76683	1.58855	6.767	5.85735	6.767	3.6225	6.76667	8.0101	6.767	5.7846	6.76683	6.4149	6.76667	7.46335
6.77517	0.306	6.77517	1.57615	6.77533	5.76445	6.77533	3.55605	6.775	7.8768	6.77533	5.6927	6.77517	6.3147	6.775	7.3481
6.7835	0.30645	6.7835	1.5662	6.78367	5.6752	6.78367	3.49035	6.78333	7.7552	6.78367	5.60545	6.7835	6.21725	6.78333	7.2348
6.79183	0.30985	6.79183	1.55695	6.792	5.5942	6.792	3.42775	6.79167	7.642	6.792	5.5238	6.79183	6.13185	6.79167	7.1253
6.80017	0.3175	6.80017	1.55295	6.80033	5.51805	6.80033	3.36675	6.8	7.53305	6.80033	5.4435	6.80017	6.0468	6.8	7.01765
6.8085	0.332	6.8085	1.55375	6.80867	5.44275	6.80867	3.30895	6.80833	7.42525	6.80867	5.36455	6.8085	5.96075	6.80833	6.9162
6.81683	0.3516	6.81683	1.5636	6.817	5.36745	6.817	3.25085	6.81667	7.3126	6.817	5.28995	6.81683	5.8829	6.81667	6.81565
6.82517	0.37845	6.82517	1.5755	6.82533	5.2944	6.82533	3.1975	6.825	7.20065	6.82533	5.2156	6.82517	5.8016	6.825	6.7189
6.8335	0.41535	6.8335	1.6051	6.83367	5.2184	6.83367	3.14575	6.83333	7.08275	6.83367	5.14095	6.8335	5.7216	6.83333	6.6247
6.84183	0.46185	6.84183	1.64375	6.842	5.14465	6.842	3.0968	6.84167	6.9588	6.842	5.0681	6.84183	5.6405	6.84167	6.5337
6.85017	0.51035	6.85017	1.689	6.85033	5.07055	6.85033	3.05025	6.85	6.83125	6.85033	4.9975	6.85017	5.5624	6.85	6.4464
6.8585	0.55305	6.8585	1.7325	6.85867	4.9949	6.85867	3.00775	6.85833	6.70405	6.85867	4.92245	6.8585	5.48155	6.85833	6.3619
6.86683	0.589	6.86683	1.77205	6.867	4.9199	6.867	2.9671	6.86667	6.57845	6.867	4.8525	6.86683	5.40505	6.86667	6.2852
6.87517	0.6085	6.87517	1.79895	6.87533	4.84505	6.87533	2.9269	6.875	6.45565	6.87533	4.78195	6.87517	5.32685	6.875	6.21085
6.8835	0.6114	6.8835	1.8081	6.88367	4.77255	6.88367	2.88775	6.88333	6.3407	6.88367	4.7154	6.8835	5.25505	6.88333	6.14125
6.89183	0.60045	6.89183	1.7985	6.892	4.6993	6.892	2.84985	6.89167	6.23105	6.892	4.65035	6.89183	5.18015	6.89167	6.0714
6.90017	0.5756	6.90017	1.7736	6.90033	4.631	6.90033	2.8134	6.9	6.13005	6.90033	4.5862	6.90017	5.1112	6.9	6.0095
6.9085	0.5452	6.9085	1.7354	6.90867	4.55845	6.90867	2.777	6.90833	6.03165	6.90867	4.52365	6.9085	5.0377	6.90833	5.94755
6.91683	0.50915	6.91683	1.6884	6.917	4.4914	6.917	2.74265	6.91667	5.9433	6.917	4.4608	6.91683	4.9703	6.91667	5.88805
6.92517	0.47445	6.92517	1.6381	6.92533	4.4251	6.92533	2.70655	6.925	5.85975	6.92533	4.4003	6.92517	4.9013	6.925	5.8297
6.9335	0.4394	6.9335	1.58885	6.93367	4.35845	6.93367	2.67285	6.93333	5.7809	6.93367	4.3385	6.9335	4.83425	6.93333	5.77345
6.94183	0.40945	6.94183	1.5449	6.942	4.2956	6.942	2.638	6.94167	5.7049	6.942	4.2766	6.94183	4.76805	6.94167	5.7148
6.95017	0.3857	6.95017	1.5016	6.95033	4.22915	6.95033	2.60635	6.95	5.63635	6.95033	4.21725	6.95017	4.703	6.95	5.658
6.9585	0.36495	6.9585	1.4679	6.95867	4.16355	6.95867	2.5711	6.95833	5.571	6.95867	4.155	6.9585	4.6379	6.95833	5.6005
6.96683	0.34525	6.96683	1.43515	6.967	4.10255	6.967	2.53855	6.96667	5.50445	6.967	4.09905	6.96683	4.5725	6.96667	5.5443
6.97517	0.33135	6.97517	1.4051	6.97533	4.04355	6.97533	2.50645	6.975	5.4418	6.97533	4.04085	6.97517	4.5113	6.975	5.4871
6.9835	0.31835	6.9835	1.3781	6.98367	3.98315	6.98367	2.47455	6.98333	5.38315	6.98367	3.973	6.9835	4.45085	6.98333	5.43105
6.99183	0.3089	6.99183	1.3567	6.992	3.9254	6.992	2.4437	6.99167	5.32525	6.992	3.87735	6.99183	4.39095	6.99167	5.37585
7.00017	0.302	7.00017	1.33895	7.00033	3.87175	7.00033	2.4141	7	5.2713	7.00033	3.9323	7.00017	4.33355	7	5.3223
7.0085	0.2959	7.0085	1.3212	7.00867	3.81775	7.00867	2.3877	7.00833	5.2176	7.00867	3.9444	7.0085	4.27985	7.00833	5.26945
7.01683	0.2916	7.01683	1.30625	7.017	3.76455	7.017	2.361	7.01667	5.16415	7.017	3.7762	7.01683	4.2262	7.01667	5.2173
7.02517	0.2882	7.02517	1.29625	7.02533	3.71535	7.02533	2.3364	7.025	5.11515	7.02533	3.72125	7.02517	4.1765	7.025	5.16765
7.0335	0.28435	7.0335	1.28225	7.03367	3.6672	7.03367	2.31095	7.03333	5.06215	7.03367	3.678	7.0335	4.1287	7.03333	5.11745
7.04183	0.2787	7.04183	1.26915	7.042	3.62215	7.042	2.28975	7.04167	5.0157	7.042	3.61845	7.04183	4.08185	7.04167	5.07025
7.05017	0.27815	7.05017	1.2597	7.05033	3.5806	7.05033	2.2702	7.05	4.97145	7.05033	3.55205	7.05017	4.04055	7.05	5.02625
7.0585	0.27825	7.0585	1.25065	7.05867	3.54245	7.05867	2.25195	7.05833	4.93165	7.05867	3.5469	7.0585	4.00395	7.05833	4.9815
7.06683	0.27665	7.06683	1.24215	7.067	3.50695	7.067	2.23485	7.06667	4.89685	7.067	3.60155	7.06683	3.9743	7.06667	4.9403
7.07517	0.2768	7.07517	1.236	7.07533	3.47955	7.07533	2.22495	7.075	4.8675	7.07533	3.5419	7.07517	3.9529	7.075	4.90085
7.0835	0.27535	7.0835	1.2263	7.08367	3.45985	7.08367	2.2169	7.08333	4.84045	7.08367	3.47115	7.0835	3.94405	7.08333	4.86335
7.09183	0.27355	7.09183	1.2217	7.092	3.45265	7.092	2.212	7.09167	4.8143	7.092	3.47235	7.09183	3.94635	7.09167	4.82865
7.10017	0.272	7.10017	1.2143	7.10033	3.44865	7.10033	2.20825	7.1	4.788	7.10033	3.4818	7.10017	3.95625	7.1	4.8029
7.1085	0.2706	7.1085	1.20485	7.10867	3.4587	7.10867	2.2103	7.10833	4.7616	7.10867	3.49895	7.1085	3.97885	7.10833	4.7803
7.11683	0.2707	7.11683	1.1986	7.117	3.4706	7.117	2.2137	7.11667	4.73645	7.117	3.5206	7.11683	4.00415	7.11667	4.7638
7.12517	0.2692	7.12517	1.19015	7.12533	3.49165	7.12533	2.2171	7.125	4.71095	7.12533	3.54425	7.12517	4.03045	7.125	4.7525
7.1335	0.26895	7.1335	1.18435	7.13367	3.5058	7.13367	2.21855	7.13333	4.68365	7.13367	3.56585	7.1335	4.05085	7.13333	4.74825
7.14183	0.26705	7.14183	1.17645	7.142	3.5165	7.142	2.2161	7.14167	4.65965	7.142	3.58195	7.14183	4.0626	7.14167	4.75335
7.15017	0.26755	7.15017	1.1726	7.15033	3.51785	7.15033	2.20915	7.15	4.6323	7.15033	3.58785	7.15017	4.05815	7.15	4.75695
7.1585	0.2683	7.1585	1.16465	7.15867	3.5072	7.15867	2.19585	7.15833	4.6065	7.15867	3.57995	7.1585	4.0401	7.15833	4.7614
7.16683	0.26665	7.16683	1.15705	7.167	3.4857	7.167	2.1772	7.16667	4.5778	7.167	3.55945	7.16683	4.0071	7.16667	4.7631
7.17517	0.2635	7.17517	1.1497	7.17533	3.45205	7.17533	2.15485	7.175	4.5509	7.17533	3.5269	7.17517	3.9609	7.175	4.7596
7.1835	0.26405	7.1835	1.1418	7.18367	3.4095	7.18367	2.127	7.18333	4.5237	7.18367	3.48345	7.1835	3.9059	7.18333	4.7475
7.19183	0.26255	7.19183	1.1345	7.192	3.35715	7.192	2.09845	7.19167	4.49525	7.192	3.4304	7.19183	3.84335	7.19167	4.7251
7.20017	0.26155	7.20017	1.1289	7.20033	3.301	7.20033	2.06575	7.2	4.4685	7.20033	3.3735	7.20017	3.77705	7.2	4.696
7.2085	0.2617	7.2085	1.1233	7.20867	3.24045	7.20867	2.03355	7.20833	4.4397	7.20867	3.3093	7.2085	3.70595	7.20833	4.6607
7.21683	0.26145	7.21683	1.1157	7.217	3.17885	7.217	2.00255	7.21667	4.41385	7.217	3.24745	7.21683	3.6381	7.21667	4.6187
7.22517	0.26135	7.22517	1.1093	7.22533	3.1181	7.22533	1.97045	7.225	4.38365	7.22533	3.18745	7.22517	3.57025	7.225	4.56815
7.2335	0.25965	7.2335	1.10275	7.23367	3.05815	7.23367	1.941	7.23333	4.3567	7.23367	3.12725	7.2335	3.5041	7.23333	4.51805
7.24183	0.25945	7.24183	1.0959	7.242	3.0004	7.242	1.9118	7.24167	4.32965	7.242	3.06935	7.24183	3.44095	7.24167	4.46975
7.25017	0.2596	7.25017	1.08905	7.25033	2.94525	7.25033	1.88525	7.25	4.30525	7.25033	3.01195	7.25017	3.3834	7.25	4.4208
7.2585	0.2621	7.2585	1.086	7.25867	2.892	7.25867	1.85865	7.25833	4.2817	7.25867	2.95925	7.2585	3.3254	7.25833	4.37275
7.26683	0.26125	7.26683	1.0811	7.267	2.8448	7.267	1.8353	7.26667	4.25965	7.267	2.91265	7.26683	3.27735	7.26667	4.322
7.27517	0.2618	7.27517	1.07445	7.27533	2.7972	7.27533	1.8134	7.275	4.23805	7.27533	2.86625	7.27517	3.2271	7.275	4.27915
7.2835	0.2624	7.2835	1.069	7.28367	2.7565	7.28367	1.7911	7.28333	4.21715	7.28367	2.8252	7.2835	3.183	7.28333	4.23575
7.29183	0.2649	7.29183	1.06345	7.292	2.71775	7.292	1.77095	7.29167	4.20055	7.292	2.7873	7.29183	3.1381	7.29167	4.194
7.30017	0.26435	7.30017	1.0608	7.30033	2.68145	7.30033	1.75185	7.3	4.1896	7.30033	2.7511	7.30017	3.09745	7.3	4.15495
7.3085	0.26535	7.3085	1.05605	7.30867	2.6463	7.30867	1.73315	7.30833	4.18455	7.30867	2.7193	7.3085	3.07055	7.30833	4.11855
7.31683	0.26815	7.31683	1.05185	7.317	2.6166	7.317	1.7161	7.31667	4.18875	7.317	2.687	7.31683	3.0338	7.31667	4.0856
7.32517	0.2661	7.32517	1.045	7.32533	2.586	7.32533	1.70205	7.325	4.20155	7.32533	2.65695	7.32517	3.00515	7.325	4.0524
7.3335	0.26865	7.3335	1.04055	7.33367	2.5569	7.33367	1.6856	7.33333	4.2229	7.33367	2.6297	7.3335	2.97535	7.33333	4.0211
7.34183	0.26815	7.34183	1.03445	7.342	2.5302	7.342	1.6714	7.34167	4.25555	7.342	2.60465	7.34183	2.9472	7.34167	3.9922
7.35017	0.268	7.35017	1.03115	7.35033	2.50595	7.35033	1.65445	7.35	4.2973	7.35033	2.57995	7.35017	2.9237	7.35	3.96505
7.3585	0.26905	7.3585	1.0253	7.35867	2.48175	7.35867	1.642	7.35833	4.33935	7.35867	2.5561	7.3585	2.9017	7.35833	3.93935
7.36683	0.2699	7.36683	1.0219	7.367	2.4608	7.367	1.6297	7.36667	4.3839	7.367	2.53455	7.36683	2.8721	7.36667	3.91505
7.37517	0.2677	7.37517	1.0157	7.37533	2.4379	7.37533	1.61645	7.375	4.4234	7.37533	2.51255	7.37517	2.8367	7.375	3.8899
7.3835	0.2686	7.3835	1.0106	7.38367	2.4169	7.38367	1.60355	7.38333	4.4534	7.38367	2.49135	7.3835	2.81715	7.38333	3.8666
7.39183	0.26985	7.39183	1.007	7.392	2.3958	7.392	1.5917	7.39167	4.4744	7.392	2.47145	7.39183	2.78045	7.39167	3.84385
7.40017	0.26825	7.40017	1.00195	7.40033	2.37435	7.40033	1.5787	7.4	4.4862	7.40033	2.45305	7.40017	2.8588	7.4	3.8238
7.4085	0.26565	7.4085	0.9952	7.40867	2.3568	7.40867	1.56985	7.40833	4.4873	7.40867	2.43325	7.4085	2.87215	7.40833	3.80225
7.41683	0.26595	7.41683	0.99015	7.417	2.3368	7.417	1.55655	7.41667	4.47885	7.417	2.41675	7.41683	2.7613	7.41667	3.78005
7.42517	0.2657	7.42517	0.9875	7.42533	2.3215	7.42533	1.54885	7.425	4.46335	7.42533	2.4006	7.42517	2.724	7.425	3.75985
7.4335	0.26595	7.4335	0.98165	7.43367	2.30075	7.43367	1.53545	7.43333	4.44155	7.43367	2.38095	7.4335	2.70455	7.43333	3.7417
7.44183	0.26305	7.44183	0.9762	7.442	2.28375	7.442	1.52765	7.44167	4.4141	7.442	2.3638	7.44183	2.68885	7.44167	3.7243
7.45017	0.26485	7.45017	0.97125	7.45033	2.2661	7.45033	1.5171	7.45	4.3804	7.45033	2.3492	7.45017	2.67125	7.45	3.7047
7.4585	0.264	7.4585	0.9679	7.45867	2.25015	7.45867	1.50835	7.45833	4.33865	7.45867	2.3338	7.4585	2.6567	7.45833	3.6872
7.46683	0.26275	7.46683	0.96175	7.467	2.23225	7.467	1.4993	7.46667	4.29185	7.467	2.31915	7.46683	2.6382	7.46667	3.66675
7.47517	0.26105	7.47517	0.9579	7.47533	2.2199	7.47533	1.48925	7.475	4.23815	7.47533	2.3062	7.47517	2.624	7.475	3.65075
7.4835	0.2607	7.4835	0.9516	7.48367	2.2041	7.48367	1.48	7.48333	4.1823	7.48367	2.29315	7.4835	2.60845	7.48333	3.635
7.49183	0.26075	7.49183	0.9515	7.492	2.1872	7.492	1.47255	7.49167	4.12515	7.492	2.27755	7.49183	2.592	7.49167	3.61785
7.50017	0.25835	7.50017	0.9456	7.50033	2.1726	7.50033	1.4633	7.5	4.0696	7.50033	2.2628	7.50017	2.57395	7.5	3.60225
7.5085	0.2574	7.5085	0.9413	7.50867	2.15995	7.50867	1.45605	7.50833	4.01705	7.50867	2.2505	7.5085	2.5593	7.50833	3.5836
7.51683	0.25875	7.51683	0.9366	7.517	2.14525	7.517	1.44635	7.51667	3.96465	7.517	2.235	7.51683	2.5452	7.51667	3.5696
7.52517	0.25845	7.52517	0.93245	7.52533	2.12915	7.52533	1.43755	7.525	3.918	7.52533	2.2215	7.52517	2.5284	7.525	3.55265
7.5335	0.2591	7.5335	0.92835	7.53367	2.11395	7.53367	1.4272	7.53333	3.87555	7.53367	2.20705	7.5335	2.5123	7.53333	3.5339
7.54183	0.25815	7.54183	0.92515	7.542	2.1	7.542	1.41825	7.54167	3.83775	7.542	2.1936	7.54183	2.4974	7.54167	3.51735
7.55017	0.2585	7.55017	0.92095	7.55033	2.0856	7.55033	1.40745	7.55	3.804	7.55033	2.17895	7.55017	2.48165	7.55	3.5006
7.5585	0.25865	7.5585	0.91735	7.55867	2.07095	7.55867	1.39785	7.55833	3.7736	7.55867	2.16455	7.5585	2.46535	7.55833	3.4834
7.56683	0.258	7.56683	0.9126	7.567	2.05835	7.567	1.38845	7.56667	3.7459	7.567	2.15105	7.56683	2.45165	7.56667	3.4641
7.57517	0.26045	7.57517	0.91055	7.57533	2.0443	7.57533	1.3786	7.575	3.72055	7.57533	2.13845	7.57517	2.4371	7.575	3.4465
7.5835	0.2592	7.5835	0.9065	7.58367	2.03025	7.58367	1.3726	7.58333	3.70085	7.58367	2.12365	7.5835	2.4208	7.58333	3.42915
7.59183	0.2611	7.59183	0.90275	7.592	2.01425	7.592	1.36385	7.59167	3.68155	7.592	2.1076	7.59183	2.40585	7.59167	3.40935
7.60017	0.261	7.60017	0.89985	7.60033	2.0044	7.60033	1.35395	7.6	3.6604	7.60033	2.097	7.60017	2.39525	7.6	3.3903
7.6085	0.26175	7.6085	0.8984	7.60867	1.98935	7.60867	1.34635	7.60833	3.6427	7.60867	2.084	7.6085	2.3815	7.60833	3.3733
7.61683	0.26245	7.61683	0.89485	7.617	1.9792	7.617	1.33985	7.61667	3.6269	7.617	2.0717	7.61683	2.3702	7.61667	3.35475
7.62517	0.2627	7.62517	0.89375	7.62533	1.96595	7.62533	1.3318	7.625	3.611	7.62533	2.06095	7.62517	2.35685	7.625	3.3403
7.6335	0.2605	7.6335	0.8876	7.63367	1.95505	7.63367	1.328	7.63333	3.59805	7.63367	2.04845	7.6335	2.34425	7.63333	3.3239
7.64183	0.2625	7.64183	0.8837	7.642	1.9431	7.642	1.32075	7.64167	3.58545	7.642	2.0397	7.64183	2.332	7.64167	3.30885
7.65017	0.26205	7.65017	0.8827	7.65033	1.93365	7.65033	1.316	7.65	3.57405	7.65033	2.0298	7.65017	2.32305	7.65	3.294
7.6585	0.26305	7.6585	0.879	7.65867	1.9221	7.65867	1.3085	7.65833	3.5625	7.65867	2.0186	7.6585	2.30865	7.65833	3.2813
7.66683	0.26255	7.66683	0.8759	7.667	1.9112	7.667	1.30315	7.66667	3.5508	7.667	2.0092	7.66683	2.29905	7.66667	3.2676
7.67517	0.26315	7.67517	0.87345	7.67533	1.89975	7.67533	1.29875	7.675	3.5417	7.67533	1.9987	7.67517	2.28805	7.675	3.2665
7.6835	0.2611	7.6835	0.8702	7.68367	1.89075	7.68367	1.29295	7.68333	3.53185	7.68367	1.9878	7.6835	2.27595	7.68333	3.24195
7.69183	0.26185	7.69183	0.86665	7.692	1.87995	7.692	1.2868	7.69167	3.52375	7.692	1.9779	7.69183	2.26345	7.69167	3.22735
7.70017	0.2597	7.70017	0.86455	7.70033	1.87015	7.70033	1.2804	7.7	3.51425	7.70033	1.9706	7.70017	2.25555	7.7	3.21705
7.7085	0.25865	7.7085	0.86045	7.70867	1.8574	7.70867	1.27415	7.70833	3.50655	7.70867	1.9573	7.7085	2.2412	7.70833	3.20615
7.71683	0.26255	7.71683	0.8603	7.717	1.84465	7.717	1.2682	7.71667	3.49895	7.717	1.9478	7.71683	2.22945	7.71667	3.1929
7.72517	0.25955	7.72517	0.85645	7.72533	1.83705	7.72533	1.26305	7.725	3.4887	7.72533	1.93865	7.72517	2.2188	7.725	3.1807
7.7335	0.2602	7.7335	0.8518	7.73367	1.82495	7.73367	1.25735	7.73333	3.48045	7.73367	1.9264	7.7335	2.20715	7.73333	3.16625
7.74183	0.25825	7.74183	0.848	7.742	1.81375	7.742	1.24955	7.74167	3.47235	7.742	1.9156	7.74183	2.19595	7.74167	3.15515
7.75017	0.25785	7.75017	0.84485	7.75033	1.80315	7.75033	1.2424	7.75	3.4629	7.75033	1.9096	7.75017	2.1834	7.75	3.14305
7.7585	0.25495	7.7585	0.8408	7.75867	1.7914	7.75867	1.2352	7.75833	3.4535	7.75867	1.8956	7.7585	2.17145	7.75833	3.13005
7.76683	0.25545	7.76683	0.8372	7.767	1.78005	7.767	1.2272	7.76667	3.44345	7.767	1.88195	7.76683	2.16035	7.76667	3.11595
7.77517	0.2572	7.77517	0.8373	7.77533	1.7688	7.77533	1.2192	7.775	3.4329	7.77533	1.87015	7.77517	2.14885	7.775	3.1046
7.7835	0.25685	7.7835	0.8328	7.78367	1.75575	7.78367	1.2126	7.78333	3.4201	7.78367	1.8578	7.7835	2.1347	7.78333	3.0877
7.79183	0.2581	7.79183	0.83025	7.792	1.74445	7.792	1.206	7.79167	3.4078	7.792	1.8472	7.79183	2.12185	7.79167	3.07505
7.80017	0.256	7.80017	0.82835	7.80033	1.7327	7.80033	1.1972	7.8	3.39475	7.80033	1.8357	7.80017	2.1112	7.8	3.06015
7.8085	0.2563	7.8085	0.8234	7.80867	1.72335	7.80867	1.1908	7.80833	3.3833	7.80867	1.82655	7.8085	2.101	7.80833	3.0463
7.81683	0.2542	7.81683	0.81835	7.817	1.7114	7.817	1.18385	7.81667	3.37245	7.817	1.815	7.81683	2.0881	7.81667	3.03095
7.82517	0.2547	7.82517	0.8151	7.82533	1.6997	7.82533	1.179	7.825	3.35905	7.82533	1.804	7.82517	2.07675	7.825	3.01375
7.8335	0.25855	7.8335	0.8148	7.83367	1.68935	7.83367	1.17225	7.83333	3.34695	7.83367	1.7941	7.8335	2.068	7.83333	3.00095
7.84183	0.2571	7.84183	0.81305	7.842	1.6805	7.842	1.16705	7.84167	3.3371	7.842	1.78415	7.84183	2.05815	7.84167	2.9872
7.85017	0.2619	7.85017	0.81415	7.85033	1.67295	7.85033	1.16285	7.85	3.3227	7.85033	1.77765	7.85017	2.04985	7.85	2.97565
7.8585	0.26325	7.8585	0.8121	7.85867	1.6672	7.85867	1.1606	7.85833	3.3122	7.85867	1.77	7.8585	2.0468	7.85833	2.96205
7.86683	0.2652	7.86683	0.8138	7.867	1.6608	7.867	1.15805	7.86667	3.3033	7.867	1.7645	7.86683	2.04415	7.86667	2.952
7.87517	0.26865	7.87517	0.8139	7.87533	1.6601	7.87533	1.15955	7.875	3.29435	7.87533	1.7615	7.87517	2.04325	7.875	2.9413
7.8835	0.2679	7.8835	0.81175	7.88367	1.6675	7.88367	1.1669	7.88333	3.28395	7.88367	1.76575	7.8835	2.0604	7.88333	2.932
7.89183	0.2668	7.89183	0.81165	7.892	1.67945	7.892	1.17585	7.89167	3.2744	7.892	1.77245	7.89183	2.08025	7.89167	2.9255
7.90017	0.26505	7.90017	0.80845	7.90033	1.70325	7.90033	1.1946	7.9	3.2647	7.90033	1.79115	7.90017	2.12115	7.9	2.9248
7.9085	0.2657	7.9085	0.8082	7.90867	1.744	7.90867	1.2201	7.90833	3.25565	7.90867	1.8211	7.9085	2.22295	7.90833	2.9261
7.91683	0.26465	7.91683	0.8047	7.917	1.80365	7.917	1.25505	7.91667	3.2479	7.917	1.86775	7.91683	2.3038	7.91667	2.93865
7.92517	0.2641	7.92517	0.8027	7.92533	1.8879	7.92533	1.30405	7.925	3.2388	7.92533	1.9364	7.92517	2.3724	7.925	2.9605
7.9335	0.26325	7.9335	0.79885	7.93367	2.00505	7.93367	1.3654	7.93333	3.2307	7.93367	2.03115	7.9335	2.51185	7.93333	2.99805
7.94183	0.2602	7.94183	0.79705	7.942	2.15115	7.942	1.4404	7.94167	3.2211	7.942	2.1544	7.94183	2.7005	7.94167	3.0574
7.95017	0.2628	7.95017	0.7949	7.95033	2.32955	7.95033	1.52365	7.95	3.2144	7.95033	2.30745	7.95017	2.915	7.95	3.1371
7.9585	0.2683	7.9585	0.79645	7.95867	2.5314	7.95867	1.61115	7.95833	3.20575	7.95867	2.48605	7.9585	3.14565	7.95833	3.23925
7.96683	0.27815	7.96683	0.80265	7.967	2.7488	7.967	1.70475	7.96667	3.1975	7.967	2.67935	7.96683	3.38185	7.96667	3.3689
7.97517	0.28195	7.97517	0.8078	7.97533	2.96415	7.97533	1.78445	7.975	3.18905	7.97533	2.87995	7.97517	3.6034	7.975	3.51505
7.9835	0.28585	7.9835	0.81545	7.98367	3.16375	7.98367	1.85915	7.98333	3.18365	7.98367	3.0698	7.9835	3.7961	7.98333	3.6738
7.99183	0.2779	7.99183	0.8124	7.992	3.3326	7.992	1.91435	7.99167	3.179	7.992	3.23825	7.99183	3.9485	7.99167	3.8359
8.00017	0.2645	8.00017	0.80655	8.00033	3.4594	8.00033	1.9557	8	3.17225	8.00033	3.36905	8.00017	4.04595	8	3.9881
8.0085	0.24305	8.0085	0.79015	8.00867	3.53785	8.00867	1.97785	8.00833	3.1689	8.00867	3.45825	8.0085	4.08995	8.00833	4.1159
8.01683	0.19045	8.01683	0.7591	8.017	3.57005	8.017	1.9829	8.01667	3.16485	8.017	3.50485	8.01683	4.08655	8.01667	4.2142
8.02517	0.3444	8.02517	0.70845	8.02533	3.55685	8.02533	1.97405	8.025	3.16095	8.02533	3.5082	8.02517	4.0371	8.025	4.27965
8.0335	1.0976	8.0335	0.91045	8.03367	3.5076	8.03367	1.95055	8.03333	3.1563	8.03367	3.4752	8.0335	3.95245	8.03333	4.3148
8.04183	2.2028	8.04183	1.7366	8.042	3.42325	8.042	1.9174	8.04167	3.14785	8.042	3.40895	8.04183	3.83605	8.04167	4.31415
8.05017	3.2415	8.05017	2.8726	8.05033	3.31565	8.05033	1.87775	8.05	3.1412	8.05033	3.3169	8.05017	3.69765	8.05	4.2909
8.0585	4.06425	8.0585	3.9165	8.05867	3.1825	8.05867	1.8285	8.05833	3.1352	8.05867	3.2004	8.0585	3.53755	8.05833	4.2453
8.06683	4.6781	8.06683	4.7344	8.067	3.0375	8.067	1.7743	8.06667	3.1255	8.067	3.072	8.06683	3.36695	8.06667	4.1823
8.07517	5.1455	8.07517	5.35215	8.07533	2.8746	8.07533	1.719	8.075	3.1171	8.07533	2.9282	8.07517	3.18915	8.075	4.10475
8.0835	5.50735	8.0835	5.8101	8.08367	2.7069	8.08367	1.65885	8.08333	3.10905	8.08367	2.77735	8.0835	3.00735	8.08333	4.0188
8.09183	5.8453	8.09183	6.18215	8.092	2.53955	8.092	1.6014	8.09167	3.09875	8.092	2.62465	8.09183	2.83075	8.09167	3.9214
8.10017	6.1794	8.10017	6.5477	8.10033	2.3738	8.10033	1.54535	8.1	3.0909	8.10033	2.4711	8.10017	2.66105	8.1	3.8201
8.1085	6.4622	8.1085	6.889	8.10867	2.2199	8.10867	1.49335	8.10833	3.0831	8.10867	2.325	8.1085	2.5061	8.10833	3.7137
8.11683	6.66195	8.11683	7.15005	8.117	2.0793	8.117	1.4405	8.11667	3.0762	8.117	2.19135	8.11683	2.3676	8.11667	3.6079
8.12517	6.7947	8.12517	7.33255	8.12533	1.95345	8.12533	1.3936	8.125	3.0693	8.12533	2.068	8.12517	2.24745	8.125	3.50585
8.1335	6.886	8.1335	7.4592	8.13367	1.84675	8.13367	1.3513	8.13333	3.0626	8.13367	1.96245	8.1335	2.14615	8.13333	3.4096
8.14183	6.9468	8.14183	7.5391	8.142	1.7564	8.142	1.31265	8.14167	3.05695	8.142	1.87105	8.14183	2.06285	8.14167	3.31945
8.15017	6.99375	8.15017	7.5973	8.15033	1.68105	8.15033	1.27585	8.15	3.0512	8.15033	1.796	8.15017	1.9927	8.15	3.2382
8.1585	7.0224	8.1585	7.6366	8.15867	1.623	8.15867	1.2448	8.15833	3.0465	8.15867	1.7346	8.1585	1.9397	8.15833	3.1646
8.16683	7.04755	8.16683	7.66735	8.167	1.5776	8.167	1.2119	8.16667	3.0421	8.167	1.69045	8.16683	1.8982	8.16667	3.10195
8.17517	7.06555	8.17517	7.68885	8.17533	1.544	8.17533	1.1854	8.175	3.0407	8.17533	1.6531	8.17517	1.8668	8.175	3.0437
8.1835	7.079	8.1835	7.7041	8.18367	1.5154	8.18367	1.16065	8.18333	3.04405	8.18367	1.6255	8.1835	1.8414	8.18333	2.99055
8.19183	7.0847	8.19183	7.7123	8.192	1.4928	8.192	1.14055	8.19167	3.0549	8.192	1.5992	8.19183	1.82075	8.19167	2.944
8.20017	7.08915	8.20017	7.7183	8.20033	1.4779	8.20033	1.1194	8.2	3.07535	8.20033	1.5851	8.20017	1.8055	8.2	2.9005
8.2085	7.09115	8.2085	7.72125	8.20867	1.465	8.20867	1.10035	8.20833	3.1193	8.20867	1.5714	8.2085	1.79375	8.20833	2.85765
8.21683	7.0882	8.21683	7.71605	8.217	1.4539	8.217	1.08355	8.21667	3.18925	8.217	1.56265	8.21683	1.7843	8.21667	2.82105
8.22517	7.0835	8.22517	7.7139	8.22533	1.4442	8.22533	1.0706	8.225	3.29705	8.22533	1.55185	8.22517	1.7744	8.225	2.78655
8.2335	7.07785	8.2335	7.707	8.23367	1.435	8.23367	1.0566	8.23333	3.4577	8.23367	1.5456	8.2335	1.76535	8.23333	2.75335
8.24183	7.0669	8.24183	7.69395	8.242	1.4267	8.242	1.04485	8.24167	3.68045	8.242	1.53785	8.24183	1.75775	8.24167	2.7241
8.25017	7.0583	8.25017	7.6865	8.25033	1.42005	8.25033	1.03615	8.25	3.9662	8.25033	1.5321	8.25017	1.74825	8.25	2.6979
8.2585	7.04475	8.2585	7.6729	8.25867	1.41305	8.25867	1.028	8.25833	4.31595	8.25867	1.52595	8.2585	1.74175	8.25833	2.6732
8.26683	7.03115	8.26683	7.6588	8.267	1.40625	8.267	1.02005	8.26667	4.71425	8.267	1.5199	8.26683	1.7339	8.26667	2.65
8.27517	7.0149	8.27517	7.6419	8.27533	1.3976	8.27533	1.0119	8.275	5.1332	8.27533	1.5113	8.27517	1.726	8.275	2.6299
8.2835	7.00125	8.2835	7.62625	8.28367	1.3898	8.28367	1.0051	8.28333	5.53665	8.28367	1.50545	8.2835	1.7169	8.28333	2.60605
8.29183	6.98145	8.29183	7.60615	8.292	1.37975	8.292	0.997351	8.29167	5.8915	8.292	1.49665	8.29183	1.7054	8.29167	2.5896
8.30017	6.9642	8.30017	7.58565	8.30033	1.37155	8.30033	0.992901	8.3	6.1622	8.30033	1.49035	8.30017	1.697	8.3	2.57385
8.3085	6.94485	8.3085	7.56805	8.30867	1.36315	8.30867	0.985351	8.30833	6.3261	8.30867	1.4815	8.3085	1.6882	8.30833	2.5572
8.31683	6.92515	8.31683	7.54625	8.317	1.3565	8.317	0.979301	8.31667	6.3695	8.317	1.474	8.31683	1.6779	8.31667	2.5415
8.32517	6.90335	8.32517	7.5247	8.32533	1.34535	8.32533	0.972551	8.325	6.2992	8.32533	1.46595	8.32517	1.66795	8.325	2.52685
8.3335	6.8806	8.3335	7.49945	8.33367	1.3371	8.33367	0.967451	8.33333	6.13125	8.33367	1.45735	8.3335	1.66025	8.33333	2.51465
8.34183	6.85715	8.34183	7.4762	8.342	1.32855	8.342	0.962951	8.34167	5.8882	8.342	1.4478	8.34183	1.6498	8.34167	2.5003
8.35017	6.83115	8.35017	7.4497	8.35033	1.32265	8.35033	0.955951	8.35	5.5946	8.35033	1.4423	8.35017	1.64255	8.35	2.4875
8.3585	6.8077	8.3585	7.4257	8.35867	1.3146	8.35867	0.950951	8.35833	5.2784	8.35867	1.4358	8.3585	1.63455	8.35833	2.47665
8.36683	6.78595	8.36683	7.40125	8.367	1.3084	8.367	0.948351	8.36667	4.96385	8.367	1.42915	8.36683	1.6276	8.36667	2.4651
8.37517	6.80185	8.37517	7.4163	8.37533	1.29955	8.37533	0.945601	8.375	4.66005	8.37533	1.4208	8.37517	1.61865	8.375	2.45345
8.3835	6.72585	8.3835	7.3373	8.38367	1.2934	8.38367	0.941201	8.38333	4.3812	8.38367	1.4155	8.3835	1.61255	8.38333	2.4472
8.39183	6.6173	8.39183	7.22765	8.392	1.28915	8.392	0.938251	8.39167	4.1306	8.392	1.4107	8.39183	1.6071	8.39167	2.436
8.40017	6.6528	8.40017	7.25935	8.40033	1.2832	8.40033	0.933501	8.4	3.9106	8.40033	1.4053	8.40017	1.6032	8.4	2.4263
8.4085	6.6475	8.4085	7.255	8.40867	1.27895	8.40867	0.931201	8.40833	3.71805	8.40867	1.4062	8.4085	1.59685	8.40833	2.41825
8.41683	6.62	8.41683	7.225	8.417	1.2749	8.417	0.928951	8.41667	3.55565	8.417	1.3997	8.41683	1.59325	8.41667	2.4079
8.42517	6.59065	8.42517	7.19475	8.42533	1.271	8.42533	0.928251	8.425	3.4159	8.42533	1.3962	8.42517	1.58855	8.425	2.4009
8.4335	6.56305	8.4335	7.16325	8.43367	1.2654	8.43367	0.926051	8.43333	3.2989	8.43367	1.3911	8.4335	1.58135	8.43333	2.3965
8.44183	6.53295	8.44183	7.13125	8.442	1.2629	8.442	0.926251	8.44167	3.1968	8.442	1.38915	8.44183	1.5766	8.44167	2.3916
8.45017	6.50245	8.45017	7.0968	8.45033	1.2604	8.45033	0.926551	8.45	3.11205	8.45033	1.3879	8.45017	1.573	8.45	2.3838
8.4585	6.47195	8.4585	7.06395	8.45867	1.25285	8.45867	0.924401	8.45833	3.04065	8.45867	1.3831	8.4585	1.5694	8.45833	2.381
8.46683	6.44175	8.46683	7.0321	8.467	1.2476	8.467	0.924851	8.46667	2.9812	8.467	1.3797	8.46683	1.5615	8.46667	2.3746
8.47517	6.4102	8.47517	6.997	8.47533	1.2457	8.47533	0.920801	8.475	2.93005	8.47533	1.37585	8.47517	1.5582	8.475	2.36945
8.4835	6.37725	8.4835	6.9621	8.48367	1.2375	8.48367	0.919451	8.48333	2.88905	8.48367	1.3705	8.4835	1.55225	8.48333	2.3619
8.49183	6.34925	8.49183	6.93045	8.492	1.236	8.492	0.918001	8.49167	2.85835	8.492	1.3682	8.49183	1.5469	8.49167	2.3552
8.50017	6.31475	8.50017	6.8949	8.50033	1.2296	8.50033	0.914851	8.5	2.8338	8.50033	1.35915	8.50017	1.54015	8.5	2.34905
8.5085	6.28345	8.5085	6.86175	8.50867	1.22485	8.50867	0.912601	8.50833	2.81725	8.50867	1.3571	8.5085	1.536	8.50833	2.3408
8.51683	6.2492	8.51683	6.82395	8.517	1.22135	8.517	0.908351	8.51667	2.80895	8.517	1.3514	8.51683	1.5314	8.51667	2.33515
8.52517	6.2156	8.52517	6.7893	8.52533	1.2164	8.52533	0.906451	8.525	2.8053	8.52533	1.3461	8.52517	1.52605	8.525	2.3258
8.5335	6.18235	8.5335	6.75255	8.53367	1.21455	8.53367	0.902451	8.53333	2.8021	8.53367	1.34485	8.5335	1.5234	8.53333	2.31775
8.54183	6.14795	8.54183	6.71585	8.542	1.20825	8.542	0.896801	8.54167	2.8011	8.542	1.3385	8.54183	1.5172	8.54167	2.3094
8.55017	6.11425	8.55017	6.6802	8.55033	1.2028	8.55033	0.893951	8.55	2.80225	8.55033	1.33225	8.55017	1.5099	8.55	2.3008
8.5585	6.0803	8.5585	6.64185	8.55867	1.2009	8.55867	0.891401	8.55833	2.80365	8.55867	1.32895	8.5585	1.5065	8.55833	2.2922
8.56683	6.04415	8.56683	6.60345	8.567	1.19555	8.567	0.886951	8.56667	2.80665	8.567	1.3236	8.56683	1.5015	8.56667	2.2843
8.57517	6.00865	8.57517	6.5634	8.57533	1.19275	8.57533	0.881351	8.575	2.80825	8.57533	1.31975	8.57517	1.49695	8.575	2.2767
8.5835	5.97305	8.5835	6.5294	8.58367	1.1895	8.58367	0.881451	8.58333	2.80615	8.58367	1.3172	8.5835	1.4941	8.58333	2.2718
8.59183	5.93775	8.59183	6.48785	8.592	1.18695	8.592	0.875751	8.59167	2.8031	8.592	1.3151	8.59183	1.4897	8.59167	2.26305
8.60017	5.89925	8.60017	6.44875	8.60033	1.18325	8.60033	0.872851	8.6	2.80125	8.60033	1.3128	8.60017	1.4886	8.6	2.25715
8.6085	5.86175	8.6085	6.40785	8.60867	1.17945	8.60867	0.868551	8.60833	2.7976	8.60867	1.3078	8.6085	1.4819	8.60833	2.24995
8.61683	5.8239	8.61683	6.36525	8.617	1.17635	8.617	0.865601	8.61667	2.7916	8.617	1.30595	8.61683	1.4798	8.61667	2.24705
8.62517	5.7857	8.62517	6.3253	8.62533	1.1718	8.62533	0.862301	8.625	2.78595	8.62533	1.30385	8.62517	1.47375	8.625	2.2417
8.6335	5.7438	8.6335	6.2921	8.63367	1.1681	8.63367	0.860851	8.63333	2.7794	8.63367	1.2989	8.6335	1.46925	8.63333	2.2357
8.64183	5.70225	8.64183	6.2378	8.642	1.16455	8.642	0.860601	8.64167	2.7753	8.642	1.2969	8.64183	1.46615	8.64167	2.2305
8.65017	5.6642	8.65017	6.1962	8.65033	1.1888	8.65033	0.857001	8.65	2.76825	8.65033	1.3216	8.65017	1.4919	8.65	2.22665
8.6585	5.6174	8.6585	6.14865	8.65867	1.17435	8.65867	0.854351	8.65833	2.76295	8.65867	1.31	8.6585	1.47695	8.65833	2.21865
8.66683	5.57265	8.66683	6.10115	8.667	1.0339	8.667	0.852601	8.66667	2.75635	8.667	1.17025	8.66683	1.3376	8.66667	2.2119
8.67517	5.52985	8.67517	6.0556	8.67533	1.13835	8.67533	0.850451	8.675	2.75145	8.67533	1.2753	8.67517	1.44165	8.675	2.2066
8.6835	5.4819	8.6835	6.0083	8.68367	1.16535	8.68367	0.846351	8.68333	2.7449	8.68367	1.30195	8.6835	1.4691	8.68333	2.20025
8.69183	5.4333	8.69183	5.96075	8.692	1.1531	8.692	0.843801	8.69167	2.74095	8.692	1.29075	8.69183	1.4559	8.69167	2.1922
8.70017	5.38355	8.70017	5.90765	8.70033	1.1384	8.70033	0.841751	8.7	2.7358	8.70033	1.27545	8.70017	1.44245	8.7	2.1862
8.7085	5.33275	8.7085	5.85695	8.70867	1.1304	8.70867	0.838801	8.70833	2.73485	8.70867	1.27145	8.7085	1.4378	8.70833	2.17805
8.71683	5.281	8.71683	5.80315	8.717	1.12605	8.717	0.835701	8.71667	2.7295	8.717	1.26265	8.71683	1.4303	8.71667	2.1711
8.72517	5.2295	8.72517	5.75005	8.72533	1.1207	8.72533	0.832001	8.725	2.72645	8.72533	1.26095	8.72517	1.4262	8.725	2.16385
8.7335	5.1741	8.7335	5.6963	8.73367	1.11585	8.73367	0.828251	8.73333	2.72585	8.73367	1.25605	8.7335	1.4214	8.73333	2.1575
8.74183	5.1194	8.74183	5.6396	8.742	1.11405	8.742	0.825201	8.74167	2.72415	8.742	1.2543	8.74183	1.42055	8.74167	2.1495
8.75017	5.06335	8.75017	5.58225	8.75033	1.1121	8.75033	0.823601	8.75	2.7238	8.75033	1.2511	8.75017	1.41745	8.75	2.143
8.7585	5.00545	8.7585	5.524	8.75867	1.1094	8.75867	0.821601	8.75833	2.72505	8.75867	1.25005	8.7585	1.41535	8.75833	2.13615
8.76683	4.94605	8.76683	5.4658	8.767	1.1028	8.767	0.819451	8.76667	2.72425	8.767	1.2456	8.76683	1.41185	8.76667	2.1304
8.77517	4.8893	8.77517	5.4071	8.77533	1.10395	8.77533	0.818251	8.775	2.72765	8.77533	1.2458	8.77517	1.4113	8.775	2.12635
8.7835	4.8294	8.7835	5.34555	8.78367	1.09855	8.78367	0.817451	8.78333	2.72475	8.78367	1.24125	8.7835	1.40715	8.78333	2.1224
8.79183	4.77125	8.79183	5.28665	8.792	1.09815	8.792	0.818901	8.79167	2.72395	8.792	1.24295	8.79183	1.40645	8.79167	2.1166
8.80017	4.70845	8.80017	5.2238	8.80033	1.09545	8.80033	0.818601	8.8	2.7215	8.80033	1.24025	8.80017	1.4033	8.8	2.1123
8.8085	4.64925	8.8085	5.16555	8.80867	1.0902	8.80867	0.818001	8.80833	2.7199	8.80867	1.23875	8.8085	1.4002	8.80833	2.10995
8.81683	4.58825	8.81683	5.1008	8.817	1.08715	8.817	0.817751	8.81667	2.71515	8.817	1.2343	8.81683	1.3947	8.81667	2.1074
8.82517	4.52675	8.82517	5.03685	8.82533	1.083	8.82533	0.820901	8.825	2.71055	8.82533	1.2334	8.82517	1.392	8.825	2.103
8.8335	4.46405	8.8335	4.9719	8.83367	1.08115	8.83367	0.816851	8.83333	2.7059	8.83367	1.23175	8.8335	1.39105	8.83333	2.1021
8.84183	4.40165	8.84183	4.907	8.842	1.07825	8.842	0.816051	8.84167	2.6999	8.842	1.2282	8.84183	1.3878	8.84167	2.09745
8.85017	4.33735	8.85017	4.8414	8.85033	1.0747	8.85033	0.817851	8.85	2.69285	8.85033	1.2245	8.85017	1.3835	8.85	2.09165
8.8585	4.27905	8.8585	4.77735	8.85867	1.0713	8.85867	0.815251	8.85833	2.6876	8.85867	1.2204	8.8585	1.38175	8.85833	2.0852
8.86683	4.21465	8.86683	4.71355	8.867	1.0679	8.867	0.811651	8.86667	2.68385	8.867	1.21815	8.86683	1.3778	8.86667	2.0816
8.87517	4.15965	8.87517	4.65625	8.87533	1.0646	8.87533	0.810251	8.875	2.67825	8.87533	1.21455	8.87517	1.3756	8.875	2.0764
8.8835	4.13195	8.8835	4.6275	8.88367	1.06055	8.88367	0.806601	8.88333	2.6745	8.88367	1.21245	8.8835	1.3721	8.88333	2.07225
8.89183	4.01725	8.89183	4.50825	8.892	1.05845	8.892	0.804601	8.89167	2.67335	8.892	1.2102	8.89183	1.37025	8.89167	2.06635
8.90017	3.83145	8.90017	4.31805	8.90033	1.05625	8.90033	0.802051	8.9	2.67035	8.90033	1.20495	8.90017	1.369	8.9	2.0595
8.9085	3.89935	8.9085	4.38525	8.90867	1.05345	8.90867	0.799601	8.90833	2.66815	8.90867	1.20425	8.9085	1.3663	8.90833	2.05455
8.91683	3.8324	8.91683	4.31515	8.917	1.0507	8.917	0.796751	8.91667	2.66635	8.917	1.2018	8.91683	1.3658	8.91667	2.04815
8.92517	3.75845	8.92517	4.2379	8.92533	1.04855	8.92533	0.792301	8.925	2.6642	8.92533	1.1996	8.92517	1.36405	8.925	2.0405
8.9335	3.69025	8.9335	4.16485	8.93367	1.0473	8.93367	0.787901	8.93333	2.65805	8.93367	1.1979	8.9335	1.36255	8.93333	2.0362
8.94183	3.62035	8.94183	4.09415	8.942	1.0421	8.942	0.784551	8.94167	2.65275	8.942	1.19425	8.94183	1.36005	8.94167	2.02995
8.95017	3.5555	8.95017	4.0242	8.95033	1.04265	8.95033	0.782051	8.95	2.64945	8.95033	1.19485	8.95017	1.3605	8.95	2.025
8.9585	3.48685	8.9585	3.9518	8.95867	1.03965	8.95867	0.778601	8.95833	2.64275	8.95867	1.19265	8.9585	1.3581	8.95833	2.0191
8.96683	3.4199	8.96683	3.88155	8.967	1.0379	8.967	0.774451	8.96667	2.6372	8.967	1.19045	8.96683	1.3557	8.96667	2.01185
8.97517	3.3521	8.97517	3.8088	8.97533	1.0363	8.97533	0.771751	8.975	2.6301	8.97533	1.1908	8.97517	1.35795	8.975	2.00825
8.9835	3.28465	8.9835	3.73715	8.98367	1.03355	8.98367	0.770801	8.98333	2.62315	8.98367	1.18785	8.9835	1.35495	8.98333	2.00225
8.99183	3.21755	8.99183	3.66685	8.992	1.03235	8.992	0.769351	8.99167	2.6158	8.992	1.18735	8.99183	1.3519	8.99167	2.0001
9.00017	3.15035	9.00017	3.59545	9.00033	1.03415	9.00033	0.767951	9	2.60895	9.00033	1.18675	9.00017	1.3502	9	1.9944
9.0085	3.0805	9.0085	3.5206	9.00867	1.03505	9.00867	0.764301	9.00833	2.60345	9.00867	1.1868	9.0085	1.34795	9.00833	1.9906
9.01683	3.01505	9.01683	3.44435	9.017	1.0322	9.017	0.764251	9.01667	2.5965	9.017	1.1836	9.01683	1.34815	9.01667	1.9843
9.02517	2.94715	9.02517	3.3533	9.02533	1.03375	9.02533	0.762051	9.025	2.5904	9.02533	1.1845	9.02517	1.3474	9.025	1.9813
9.0335	2.8826	9.0335	3.35005	9.03367	1.0343	9.03367	0.761701	9.03333	2.58365	9.03367	1.1838	9.0335	1.34685	9.03333	1.97635
9.04183	2.8143	9.04183	3.3967	9.042	1.0371	9.042	0.758251	9.04167	2.5786	9.042	1.1835	9.04183	1.34835	9.04167	1.971
9.05017	2.75215	9.05017	3.14615	9.05033	1.0389	9.05033	0.757501	9.05	2.57335	9.05033	1.1862	9.05017	1.34945	9.05	1.96885
9.0585	2.6856	9.0585	3.0841	9.05867	1.04175	9.05867	0.757301	9.05833	2.56885	9.05867	1.18775	9.0585	1.35045	9.05833	1.9653
9.06683	2.6183	9.06683	3.01305	9.067	1.04555	9.067	0.754851	9.06667	2.56235	9.067	1.18705	9.06683	1.35105	9.06667	1.96095
9.07517	2.5572	9.07517	2.95025	9.07533	1.06075	9.07533	0.752451	9.075	2.55705	9.07533	1.18915	9.07517	1.351	9.075	1.95835
9.0835	2.49005	9.0835	2.88005	9.08367	1.1015	9.08367	0.749451	9.08333	2.55365	9.08367	1.1904	9.0835	1.3528	9.08333	1.95805
9.09183	2.4284	9.09183	2.81685	9.092	1.14315	9.092	0.748351	9.09167	2.5505	9.092	1.18855	9.09183	1.356	9.09167	1.95805
9.10017	2.36395	9.10017	2.74805	9.10033	1.1653	9.10033	0.746551	9.1	2.54875	9.10033	1.19295	9.10017	1.36445	9.1	1.9563
9.1085	2.30255	9.1085	2.6815	9.10867	1.17355	9.10867	0.743701	9.10833	2.5453	9.10867	1.19755	9.1085	1.39335	9.10833	1.95585
9.11683	2.2426	9.11683	2.6162	9.117	1.1893	9.117	0.742751	9.11667	2.5451	9.117	1.22395	9.11683	1.44045	9.11667	1.9527
9.12517	2.18135	9.12517	2.55255	9.12533	1.20295	9.12533	0.741401	9.125	2.5429	9.12533	1.26525	9.12517	1.47145	9.125	1.9568
9.1335	2.123	9.1335	2.4907	9.13367	1.20585	9.13367	0.738801	9.13333	2.5435	9.13367	1.3053	9.1335	1.485	9.13333	1.9616
9.14183	2.06555	9.14183	2.42925	9.142	1.19915	9.142	0.738901	9.14167	2.54405	9.142	1.32525	9.14183	1.4999	9.14167	1.98705
9.15017	2.0077	9.15017	2.36785	9.15033	1.1838	9.15033	0.737101	9.15	2.54205	9.15033	1.33895	9.15017	1.51315	9.15	2.03415
9.1585	1.95	9.1585	2.30905	9.15867	1.17	9.15867	0.735651	9.15833	2.53995	9.15867	1.35555	9.1585	1.5219	9.15833	2.0718
9.16683	1.8962	9.16683	2.25145	9.167	1.1537	9.167	0.732801	9.16667	2.53545	9.167	1.3688	9.16683	1.5137	9.16667	2.09165
9.17517	1.8395	9.17517	2.1913	9.17533	1.13915	9.17533	0.733251	9.175	2.53595	9.17533	1.3661	9.17517	1.50035	9.175	2.1058
9.1835	1.7868	9.1835	2.13565	9.18367	1.1206	9.18367	0.733001	9.18333	2.53115	9.18367	1.35335	9.1835	1.48355	9.18333	2.1187
9.19183	1.7337	9.19183	2.08325	9.192	1.06905	9.192	0.730051	9.19167	2.52465	9.192	1.33825	9.19183	1.468	9.19167	2.1252
9.20017	1.68115	9.20017	2.02885	9.20033	1.10295	9.20033	0.732051	9.2	2.5183	9.20033	1.3218	9.20017	1.4541	9.2	2.11445
9.2085	1.6302	9.2085	1.97735	9.20867	1.83755	9.20867	0.731751	9.20833	2.5144	9.20867	1.30825	9.2085	1.44575	9.20833	2.0983
9.21683	1.58325	9.21683	1.9309	9.217	3.2711	9.217	0.731151	9.21667	2.5093	9.217	1.2967	9.21683	1.4335	9.21667	2.07755
9.22517	1.5325	9.22517	1.8805	9.22533	4.88745	9.22533	0.731101	9.225	2.50255	9.22533	1.287	9.22517	1.39285	9.225	2.05695
9.2335	1.4854	9.2335	1.8359	9.23367	6.3244	9.23367	0.727751	9.23333	2.49565	9.23367	1.2666	9.2335	1.374	9.23333	2.03815
9.24183	1.4418	9.24183	1.79165	9.242	7.4326	9.242	0.728201	9.24167	2.49035	9.242	1.20435	9.24183	1.9504	9.24167	2.02415
9.25017	1.3979	9.25017	1.7469	9.25033	8.23265	9.25033	0.726701	9.25	2.48435	9.25033	1.4696	9.25017	3.3845	9.25	2.0104
9.2585	1.3549	9.2585	1.7033	9.25867	8.80465	9.25867	0.727351	9.25833	2.4789	9.25867	2.6128	9.2585	5.0958	9.25833	2.0032
9.26683	1.31405	9.26683	1.66465	9.267	9.2327	9.267	0.724401	9.26667	2.47535	9.267	4.2883	9.26683	6.5811	9.26667	1.9962
9.27517	1.27465	9.27517	1.6261	9.27533	9.567	9.27533	0.722501	9.275	2.47085	9.27533	5.8892	9.27517	7.6953	9.275	1.984
9.2835	1.23405	9.2835	1.587	9.28367	9.838	9.28367	0.722751	9.28333	2.4664	9.28367	7.1529	9.2835	8.491	9.28333	2.20055
9.29183	1.1986	9.29183	1.5524	9.292	10.0808	9.292	0.719751	9.29167	2.46265	9.292	8.04885	9.29183	9.0615	9.29167	3.03385
9.30017	1.16345	9.30017	1.51515	9.30033	10.3299	9.30033	0.721201	9.3	2.4565	9.30033	8.69095	9.30017	9.489	9.3	4.32685
9.3085	1.1258	9.3085	1.48095	9.30867	10.5628	9.30867	0.723951	9.30833	2.4539	9.30867	9.16055	9.3085	9.8188	9.30833	5.6448
9.31683	1.09255	9.31683	1.4483	9.317	10.7568	9.317	0.725101	9.31667	2.45125	9.317	9.5215	9.31683	10.084	9.31667	6.74105
9.32517	1.06045	9.32517	1.41655	9.32533	10.9045	9.32533	0.735851	9.325	2.45045	9.32533	9.80945	9.32517	10.3321	9.325	7.56595
9.3335	1.0288	9.3335	1.3851	9.33367	11.0119	9.33367	0.758051	9.33333	2.44845	9.33367	10.0518	9.3335	10.5826	9.33333	8.174
9.34183	1	9.34183	1.3565	9.342	11.0891	9.342	0.776051	9.34167	2.44475	9.342	10.2942	9.34183	10.8151	9.34167	8.6313
9.35017	0.9723	9.35017	1.33	9.35033	11.1456	9.35033	0.794201	9.35	2.4439	9.35033	10.5343	9.35017	11.0035	9.35	8.98835
9.3585	0.94415	9.3585	1.3003	9.35867	11.1896	9.35867	0.801901	9.35833	2.4421	9.35867	10.7442	9.3585	11.1425	9.35833	9.2749
9.36683	0.91695	9.36683	1.27505	9.367	11.222	9.367	0.810801	9.36667	2.43845	9.367	10.9053	9.36683	11.2396	9.36667	9.5263
9.37517	0.8943	9.37517	1.25195	9.37533	11.2492	9.37533	0.812951	9.375	2.43695	9.37533	11.0214	9.37517	11.3092	9.375	9.77465
9.3835	0.87	9.3835	1.22695	9.38367	11.2711	9.38367	0.809951	9.38333	2.43585	9.38367	11.1024	9.3835	11.3579	9.38333	10.0161
9.39183	0.84725	9.39183	1.2021	9.392	11.2882	9.392	0.800451	9.39167	2.43375	9.392	11.1613	9.39183	11.3977	9.39167	10.22
9.40017	0.824	9.40017	1.18025	9.40033	11.301	9.40033	0.789051	9.4	2.43105	9.40033	11.2056	9.40017	11.4278	9.4	10.3742
9.4085	0.80065	9.4085	1.1566	9.40867	11.3116	9.40867	0.777001	9.40833	2.42635	9.40867	11.2377	9.4085	11.4517	9.40833	10.4787
9.41683	0.7786	9.41683	1.13495	9.417	11.3218	9.417	0.766951	9.41667	2.42375	9.417	11.2665	9.41683	11.4699	9.41667	10.5525
9.42517	0.76	9.42517	1.11555	9.42533	11.3275	9.42533	0.757751	9.425	2.4209	9.42533	11.2869	9.42517	11.4854	9.425	10.6059
9.4335	0.73995	9.4335	1.09325	9.43367	11.3297	9.43367	0.751751	9.43333	2.4169	9.43367	11.3039	9.4335	11.4951	9.43333	10.6471
9.44183	0.7223	9.44183	1.07615	9.442	11.3327	9.442	0.750001	9.44167	2.41455	9.442	11.3178	9.44183	11.5042	9.44167	10.6754
9.45017	0.7044	9.45017	1.05695	9.45033	11.3332	9.45033	0.744801	9.45	2.41275	9.45033	11.3286	9.45017	11.511	9.45	10.6959
9.4585	0.6898	9.4585	1.0399	9.45867	11.3333	9.45867	0.743151	9.45833	2.4107	9.45867	11.3373	9.4585	11.5157	9.45833	10.714
9.46683	0.67405	9.46683	1.02205	9.467	11.3299	9.467	0.743451	9.46667	2.40655	9.467	11.3411	9.46683	11.5161	9.46667	10.7273
9.47517	0.65715	9.47517	1.0057	9.47533	11.3287	9.47533	0.744151	9.475	2.40575	9.47533	11.3449	9.47517	11.5162	9.475	10.7337
9.4835	0.64285	9.4835	0.991	9.48367	11.3242	9.48367	0.736401	9.48333	2.405	9.48367	11.3486	9.4835	11.5153	9.48333	10.7399
9.49183	0.62985	9.49183	0.97535	9.492	11.3229	9.492	0.700751	9.49167	2.40385	9.492	11.351	9.49183	11.5166	9.49167	10.7427
9.50017	0.6175	9.50017	0.9614	9.50033	11.315	9.50033	0.612701	9.5	2.40485	9.50033	11.3478	9.50017	11.5107	9.5	10.7436
9.5085	0.60515	9.5085	0.9465	9.50867	11.3106	9.50867	0.880101	9.50833	2.4058	9.50867	11.3448	9.5085	11.5068	9.50833	10.7417
9.51683	0.592	9.51683	0.93305	9.517	11.3034	9.517	2.1654	9.51667	2.4084	9.517	11.3413	9.51683	11.5005	9.51667	10.7392
9.52517	0.5819	9.52517	0.9205	9.52533	11.297	9.52533	3.96005	9.525	2.40985	9.52533	11.3391	9.52517	11.4968	9.525	10.7325
9.5335	0.5704	9.5335	0.90715	9.53367	11.2887	9.53367	5.52125	9.53333	2.4137	9.53367	11.3327	9.5335	11.488	9.53333	10.728
9.54183	0.561	9.54183	0.8953	9.542	11.281	9.542	6.68005	9.54167	2.41435	9.542	11.3277	9.54183	11.4825	9.54167	10.7203
9.55017	0.54805	9.55017	0.88185	9.55033	11.2738	9.55033	7.49595	9.55	2.4161	9.55033	11.3221	9.55017	11.4758	9.55	10.7136
9.5585	0.53935	9.5585	0.87265	9.55867	11.2632	9.55867	8.0815	9.55833	2.41755	9.55867	11.3146	9.5585	11.4662	9.55833	10.7043
9.56683	0.529	9.56683	0.8633	9.567	11.2543	9.567	8.50915	9.56667	2.41745	9.567	11.3065	9.56683	11.4555	9.56667	10.6962
9.57517	0.5208	9.57517	0.8497	9.57533	11.2429	9.57533	8.83675	9.575	2.41635	9.57533	11.2965	9.57517	11.4478	9.575	10.6821
9.5835	0.5126	9.5835	0.84205	9.58367	11.2339	9.58367	9.10085	9.58333	2.41395	9.58367	11.2888	9.5835	11.4382	9.58333	10.6727
9.59183	0.5031	9.59183	0.83195	9.592	11.225	9.592	9.35195	9.59167	2.4123	9.592	11.2803	9.59183	11.428	9.59167	10.6588
9.60017	0.4969	9.60017	0.82415	9.60033	11.2129	9.60033	9.61005	9.6	2.4106	9.60033	11.2698	9.60017	11.4151	9.6	10.6451
9.6085	0.4873	9.6085	0.81465	9.60867	11.2009	9.60867	9.8431	9.60833	2.40865	9.60867	11.2582	9.6085	11.4039	9.60833	10.6349
9.61683	0.4796	9.61683	0.80425	9.617	11.1885	9.617	10.0239	9.61667	2.40885	9.617	11.2469	9.61683	11.3912	9.61667	10.6212
9.62517	0.4735	9.62517	0.79655	9.62533	11.1778	9.62533	10.1577	9.625	2.4109	9.62533	11.2372	9.62517	11.3785	9.625	10.6064
9.6335	0.46835	9.6335	0.7918	9.63367	11.1655	9.63367	10.2504	9.63333	2.41665	9.63367	11.224	9.6335	11.3651	9.63333	10.5894
9.64183	0.4586	9.64183	0.7822	9.642	11.1516	9.642	10.3177	9.64167	2.43635	9.642	11.2121	9.64183	11.3522	9.64167	10.5746
9.65017	0.4535	9.65017	0.7756	9.65033	11.1353	9.65033	10.3654	9.65	2.49155	9.65033	11.1966	9.65017	11.3375	9.65	10.559
9.6585	0.44805	9.6585	0.7689	9.65867	11.1243	9.65867	10.4021	9.65833	2.60335	9.65867	11.1851	9.6585	11.3242	9.65833	10.5404
9.66683	0.4413	9.66683	0.76385	9.667	11.1107	9.667	10.4256	9.66667	2.76345	9.667	11.1704	9.66683	11.3079	9.66667	10.5247
9.67517	0.4358	9.67517	0.7566	9.67533	11.0982	9.67533	10.4457	9.675	2.8682	9.67533	11.1565	9.67517	11.2935	9.675	10.5062
9.6835	0.43115	9.6835	0.7495	9.68367	11.0824	9.68367	10.4604	9.68333	2.89265	9.68367	11.1424	9.6835	11.28	9.68333	10.4899
9.69183	0.42735	9.69183	0.7444	9.692	11.0665	9.692	10.4682	9.69167	2.88705	9.692	11.1265	9.69183	11.2627	9.69167	10.4691
9.70017	0.42065	9.70017	0.7361	9.70033	11.0515	9.70033	10.4721	9.7	2.87315	9.70033	11.1097	9.70017	11.2478	9.7	10.4509
9.7085	0.4187	9.7085	0.7335	9.70867	11.0356	9.70867	10.473	9.70833	2.8682	9.70867	11.0946	9.7085	11.2307	9.70833	10.4314
9.71683	0.4101	9.71683	0.7287	9.717	11.0185	9.717	10.4722	9.71667	2.8806	9.717	11.0793	9.71683	11.2152	9.71667	10.4117
9.72517	0.4064	9.72517	0.7227	9.72533	11.0033	9.72533	10.4686	9.725	2.871	9.72533	11.0621	9.72517	11.1962	9.725	10.3941
9.7335	0.4039	9.7335	0.71855	9.73367	10.9872	9.73367	10.466	9.73333	2.8017	9.73367	11.0458	9.7335	11.1799	9.73333	10.3689
9.74183	0.39945	9.74183	0.71415	9.742	10.9658	9.742	10.4584	9.74167	2.81315	9.742	11.0265	9.74183	11.1591	9.74167	10.3494
9.75017	0.39655	9.75017	0.7115	9.75033	10.9528	9.75033	10.452	9.75	3.2515	9.75033	11.0116	9.75017	11.1431	9.75	10.3287
9.7585	0.3924	9.7585	0.70635	9.75867	10.9323	9.75867	10.4443	9.75833	3.9849	9.75867	10.993	9.7585	11.1224	9.75833	10.3058
9.76683	0.38705	9.76683	0.7002	9.767	10.9144	9.767	10.4311	9.76667	4.66755	9.767	10.9754	9.76683	11.1076	9.76667	10.287
9.77517	0.38695	9.77517	0.699	9.77533	10.893	9.77533	10.4226	9.775	5.20095	9.77533	10.9531	9.77517	11.0854	9.775	10.2634
9.7835	0.38285	9.7835	0.69595	9.78367	10.8759	9.78367	10.4111	9.78333	5.60155	9.78367	10.9346	9.7835	11.0654	9.78333	10.2395
9.79183	0.38065	9.79183	0.69295	9.792	10.8555	9.792	10.3959	9.79167	5.89725	9.792	10.9153	9.79183	11.0469	9.79167	10.2173
9.80017	0.37555	9.80017	0.68875	9.80033	10.8331	9.80033	10.3826	9.8	6.13805	9.80033	10.894	9.80017	11.024	9.8	10.1942
9.8085	0.3705	9.8085	0.68555	9.80867	10.8129	9.80867	10.3697	9.80833	6.3605	9.80867	10.8747	9.8085	11.0022	9.80833	10.1682
9.81683	0.3685	9.81683	0.6848	9.817	10.7945	9.817	10.3554	9.81667	6.5497	9.817	10.8546	9.81683	10.9825	9.81667	10.1411
9.82517	0.3671	9.82517	0.68125	9.82533	10.7729	9.82533	10.3408	9.825	6.68155	9.82533	10.8328	9.82517	10.9601	9.825	10.1166
9.8335	0.3618	9.8335	0.6776	9.83367	10.7526	9.83367	10.3227	9.83333	6.7675	9.83367	10.8132	9.8335	10.9375	9.83333	10.0902
9.84183	0.36095	9.84183	0.6782	9.842	10.7285	9.842	10.3087	9.84167	6.81745	9.842	10.7879	9.84183	10.9142	9.84167	10.064
9.85017	0.35795	9.85017	0.6742	9.85033	10.7073	9.85033	10.2913	9.85	6.84475	9.85033	10.7682	9.85017	10.8908	9.85	10.0371
9.8585	0.35735	9.8585	0.67455	9.85867	10.686	9.85867	10.2743	9.85833	6.85825	9.85867	10.7454	9.8585	10.8675	9.85833	10.0127
9.86683	0.35485	9.86683	0.6772	9.867	10.6648	9.867	10.2546	9.86667	6.8625	9.867	10.7237	9.86683	10.8454	9.86667	9.9842
9.87517	0.3533	9.87517	0.67515	9.87533	10.6436	9.87533	10.2372	9.875	6.85855	9.87533	10.6995	9.87517	10.8219	9.875	9.95905
9.8835	0.35155	9.8835	0.6771	9.88367	10.6195	9.88367	10.2183	9.88333	6.8516	9.88367	10.666	9.8835	10.7973	9.88333	9.9296
9.89183	0.3485	9.89183	0.6767	9.892	10.5971	9.892	10.1974	9.89167	6.84075	9.892	10.6397	9.89183	10.7719	9.89167	9.9016
9.90017	0.3484	9.90017	0.67755	9.90033	10.5743	9.90033	10.1786	9.9	6.82745	9.90033	10.6393	9.90017	10.7485	9.9	9.8728
9.9085	0.3453	9.9085	0.68015	9.90867	10.5508	9.90867	10.1586	9.90833	6.81385	9.90867	10.6032	9.9085	10.7239	9.90833	9.84575
9.91683	0.34355	9.91683	0.6823	9.917	10.5295	9.917	10.1365	9.91667	6.7986	9.917	10.5806	9.91683	10.6984	9.91667	9.81715
9.92517	0.34295	9.92517	0.68415	9.92533	10.5053	9.92533	10.1162	9.925	6.7823	9.92533	10.5589	9.92517	10.675	9.925	9.7893
9.9335	0.34005	9.9335	0.6866	9.93367	10.4786	9.93367	10.0931	9.93333	6.7654	9.93367	10.5353	9.9335	10.65	9.93333	9.7589
9.94183	0.3372	9.94183	0.68865	9.942	10.4579	9.942	10.071	9.94167	6.74895	9.942	10.5122	9.94183	10.6235	9.94167	9.729
9.95017	0.33675	9.95017	0.6928	9.95033	10.4299	9.95033	10.0514	9.95	6.734	9.95033	10.4843	9.95017	10.5963	9.95	9.6972
9.9585	0.3347	9.9585	0.6965	9.95867	10.4038	9.95867	10.0259	9.95833	6.7234	9.95867	10.4608	9.9585	10.5699	9.95833	9.6672
9.96683	0.3361	9.96683	0.70095	9.967	10.3792	9.967	10.0057	9.96667	6.7117	9.967	10.4362	9.96683	10.5445	9.96667	9.6352
9.97517	0.3343	9.97517	0.7043	9.97533	10.3514	9.97533	9.98145	9.975	6.70155	9.97533	10.4103	9.97517	10.517	9.975	9.60415
9.9835	0.33255	9.9835	0.7077	9.98367	10.3203	9.98367	9.95855	9.98333	6.6925	9.98367	10.3816	9.9835	10.4863	9.98333	9.57335
9.99183	0.3315	9.99183	0.70915	9.992	10.3081	9.992	9.93235	9.99167	6.6816	9.992	10.3698	9.99183	10.4741	9.99167	9.54265
10.0002	0.3331	10.0002	0.7124	10.0003	10.2622	10.0003	9.90895	10	6.6736	10.0003	10.3272	10.0002	10.4284	10	9.50995
10.0085	0.3324	10.0085	0.71415	10.0087	10.2392	10.0087	9.88295	10.0083	6.66755	10.0087	10.3064	10.0085	10.408	10.0083	9.47555
10.0168	0.33065	10.0168	0.71295	10.017	10.2089	10.017	9.85765	10.0167	6.6604	10.017	10.2773	10.0168	10.3782	10.0167	9.44425
10.0252	0.3303	10.0252	0.71435	10.0253	10.1794	10.0253	9.831	10.025	6.6531	10.0253	10.2509	10.0252	10.3491	10.025	9.4116
10.0335	0.3296	10.0335	0.7145	10.0337	10.1479	10.0337	9.8058	10.0333	6.6446	10.0337	10.2228	10.0335	10.3186	10.0333	9.37915
10.0418	0.32775	10.0418	0.7141	10.042	10.1153	10.042	9.77775	10.0417	6.6353	10.042	10.1943	10.0418	10.2882	10.0417	9.34405
10.0502	0.3276	10.0502	0.71315	10.0503	10.085	10.0503	9.75045	10.05	6.62725	10.0503	10.1655	10.0502	10.2582	10.05	9.31075
10.0585	0.3269	10.0585	0.7115	10.0587	10.0517	10.0587	9.7225	10.0583	6.61955	10.0587	10.1359	10.0585	10.2248	10.0583	9.2766
10.0668	0.32445	10.0668	0.70715	10.067	10.0182	10.067	9.6915	10.0667	6.6119	10.067	10.106	10.0668	10.1911	10.0667	9.2436
10.0752	0.3266	10.0752	0.7079	10.0753	9.98465	10.0753	9.66135	10.075	6.60395	10.0753	10.0751	10.0752	10.1579	10.075	9.2092
10.0835	0.32675	10.0835	0.70515	10.0837	9.9434	10.0837	9.63305	10.0833	6.5964	10.0837	10.0367	10.0835	10.1197	10.0833	9.17285
10.0918	0.32525	10.0918	0.7027	10.092	9.9172	10.092	9.6003	10.0917	6.586	10.092	10.0116	10.0918	10.0926	10.0917	9.13705
10.1002	0.3236	10.1002	0.7017	10.1003	9.88035	10.1003	9.56855	10.1	6.57475	10.1003	9.9774	10.1002	10.0558	10.1	9.101
10.1085	0.3239	10.1085	0.69655	10.1087	9.84325	10.1087	9.5384	10.1083	6.5628	10.1087	9.942	10.1085	10.0198	10.1083	9.0669
10.1168	0.32565	10.1168	0.69585	10.117	9.81915	10.117	9.5039	10.1167	6.55235	10.117	9.92065	10.1168	9.99605	10.1167	9.02915
10.1252	0.32535	10.1252	0.6922	10.1253	9.7599	10.1253	9.4707	10.125	6.5417	10.1253	9.86375	10.1252	9.9341	10.125	8.99155
10.1335	0.3241	10.1335	0.68885	10.1337	9.7099	10.1337	9.4366	10.1333	6.52925	10.1337	9.8165	10.1335	9.8858	10.1333	8.9529
10.1418	0.3255	10.1418	0.6891	10.142	9.8117	10.142	9.4016	10.1417	6.5207	10.142	9.9213	10.1418	9.98655	10.1417	8.91605
10.1502	0.3265	10.1502	0.68575	10.1503	9.5555	10.1503	9.3641	10.15	6.5082	10.1503	9.6671	10.1502	9.73075	10.15	8.87675
10.1585	0.3275	10.1585	0.68445	10.1587	9.6152	10.1587	9.32375	10.1583	6.4967	10.1587	9.728	10.1585	9.78885	10.1583	8.83865
10.1668	0.3291	10.1668	0.6844	10.167	9.57735	10.167	9.2875	10.1667	6.4838	10.167	9.69115	10.1668	9.74825	10.1667	8.79655
10.1752	0.33275	10.1752	0.6871	10.1753	9.52435	10.1753	9.24895	10.175	6.4731	10.1753	9.6408	10.1752	9.6945	10.175	8.7549
10.1835	0.3359	10.1835	0.6859	10.1837	9.476	10.1837	9.20855	10.1833	6.45935	10.1837	9.59255	10.1835	9.64295	10.1833	8.71385
10.1918	0.33755	10.1918	0.68775	10.192	9.4351	10.192	9.1661	10.1917	6.44765	10.192	9.55355	10.1918	9.60055	10.1917	8.67155
10.2002	0.34135	10.2002	0.6903	10.2003	9.3869	10.2003	9.12525	10.2	6.4343	10.2003	9.50605	10.2002	9.55	10.2	8.6296
10.2085	0.3478	10.2085	0.6944	10.2087	9.33955	10.2087	9.08135	10.2083	6.42445	10.2087	9.45955	10.2085	9.5	10.2083	8.5856
10.2168	0.3546	10.2168	0.69995	10.217	9.2925	10.217	9.0371	10.2167	6.41075	10.217	9.41275	10.2168	9.44985	10.2167	8.5408
10.2252	0.3635	10.2252	0.70625	10.2253	9.2415	10.2253	8.99135	10.225	6.3959	10.2253	9.3633	10.2252	9.3979	10.225	8.49485
10.2335	0.37115	10.2335	0.71345	10.2337	9.18935	10.2337	8.946	10.2333	6.3836	10.2337	9.313	10.2335	9.34175	10.2333	8.44795
10.2418	0.3837	10.2418	0.7233	10.242	9.1389	10.242	8.9008	10.2417	6.37025	10.242	9.2615	10.2418	9.2886	10.2417	8.39965
10.2502	0.39505	10.2502	0.7333	10.2503	9.0842	10.2503	8.8534	10.25	6.3559	10.2503	9.208	10.2502	9.23185	10.25	8.34955
10.2585	0.40725	10.2585	0.7456	10.2587	9.02865	10.2587	8.8059	10.2583	6.34285	10.2587	9.1529	10.2585	9.17335	10.2583	8.3027
10.2668	0.42445	10.2668	0.7591	10.267	8.97495	10.267	8.75705	10.2667	6.3318	10.267	9.10025	10.2668	9.1163	10.2667	8.24945
10.2752	0.4382	10.2752	0.77525	10.2753	8.9182	10.2753	8.7058	10.275	6.31765	10.2753	9.0435	10.2752	9.0573	10.275	8.1992
10.2835	0.45445	10.2835	0.7912	10.2837	8.85895	10.2837	8.6551	10.2833	6.30325	10.2837	8.98595	10.2835	8.99445	10.2833	8.1474
10.2918	0.47365	10.2918	0.8099	10.292	8.80205	10.292	8.60445	10.2917	6.28805	10.292	8.92865	10.2918	8.9335	10.2917	8.0931
10.3002	0.48995	10.3002	0.82595	10.3003	8.7416	10.3003	8.5523	10.3	6.27505	10.3003	8.86965	10.3002	8.87085	10.3	8.0382
10.3085	0.5089	10.3085	0.843251	10.3087	8.68055	10.3087	8.4986	10.3083	6.26135	10.3087	8.8098	10.3085	8.80955	10.3083	7.97905
10.3168	0.5306	10.3168	0.864251	10.317	8.6177	10.317	8.4445	10.3167	6.2463	10.317	8.7471	10.3168	8.74085	10.3167	7.92505
10.3252	0.5475	10.3252	0.880651	10.3253	8.5536	10.3253	8.38805	10.325	6.2322	10.3253	8.68265	10.3252	8.6749	10.325	7.86655
10.3335	0.5662	10.3335	0.899001	10.3337	8.4884	10.3337	8.3344	10.3333	6.21555	10.3337	8.61915	10.3335	8.6076	10.3333	7.8104
10.3418	0.58315	10.3418	0.916151	10.342	8.42235	10.342	8.27335	10.3417	6.2018	10.342	8.5545	10.3418	8.5409	10.3417	7.75
10.3502	0.60095	10.3502	0.935901	10.3503	8.3539	10.3503	8.21535	10.35	6.18405	10.3503	8.4873	10.3502	8.47035	10.35	7.68915
10.3585	0.61685	10.3585	0.952701	10.3587	8.28695	10.3587	8.157	10.3583	6.1676	10.3587	8.41925	10.3585	8.40145	10.3583	7.6298
10.3668	0.6352	10.3668	0.969951	10.367	8.2163	10.367	8.09505	10.3667	6.1534	10.367	8.3491	10.3668	8.32855	10.3667	7.56645
10.3752	0.64855	10.3752	0.985001	10.3753	8.1463	10.3753	8.0303	10.375	6.13545	10.3753	8.2789	10.3752	8.2551	10.375	7.5055
10.3835	0.66445	10.3835	1.0003	10.3837	8.07595	10.3837	7.9657	10.3833	6.11835	10.3837	8.20875	10.3835	8.18245	10.3833	7.445
10.3918	0.6757	10.3918	1.01505	10.392	8.0014	10.392	7.9006	10.3917	6.09985	10.392	8.13695	10.3918	8.107	10.3917	7.37965
10.4002	0.68655	10.4002	1.02565	10.4003	7.9272	10.4003	7.8336	10.4	6.0837	10.4003	8.0631	10.4002	8.03115	10.4	7.3153
10.4085	0.69825	10.4085	1.0371	10.4087	7.85345	10.4087	7.7631	10.4083	6.0639	10.4087	7.9873	10.4085	7.9539	10.4083	7.2524
10.4168	0.70915	10.4168	1.0458	10.417	7.77575	10.417	7.6912	10.4167	6.0461	10.417	7.91335	10.4168	7.8748	10.4167	7.18595
10.4252	0.7189	10.4252	1.0574	10.4253	7.69965	10.4253	7.61845	10.425	6.0252	10.4253	7.8375	10.4252	7.7967	10.425	7.1212
10.4335	0.72665	10.4335	1.0654	10.4337	7.62005	10.4337	7.54345	10.4333	6.00575	10.4337	7.7581	10.4335	7.7165	10.4333	7.0553
10.4418	0.73325	10.4418	1.0713	10.442	7.5417	10.442	7.46495	10.4417	5.9871	10.442	7.6793	10.4418	7.63535	10.4417	6.9875
10.4502	0.73925	10.4502	1.07725	10.4503	7.46025	10.4503	7.385	10.45	5.96815	10.4503	7.59935	10.4502	7.5516	10.45	6.92275
10.4585	0.7444	10.4585	1.0813	10.4587	7.37965	10.4587	7.30525	10.4583	5.94775	10.4587	7.51865	10.4585	7.4695	10.4583	6.8526
10.4668	0.7496	10.4668	1.08635	10.467	7.29615	10.467	7.22255	10.4667	5.9276	10.467	7.4364	10.4668	7.3856	10.4667	6.7865
10.4752	0.75355	10.4752	1.08935	10.4753	7.21295	10.4753	7.1385	10.475	5.90685	10.4753	7.3524	10.4752	7.2992	10.475	6.7159
10.4835	0.75335	10.4835	1.08795	10.4837	7.12845	10.4837	7.0506	10.4833	5.8844	10.4837	7.27055	10.4835	7.215	10.4833	6.64575
10.4918	0.749551	10.4918	1.08385	10.492	7.04165	10.492	6.95965	10.4917	5.86395	10.492	7.1831	10.4918	7.126	10.4917	6.57735
10.5002	0.746951	10.5002	1.08155	10.5003	6.95675	10.5003	6.8668	10.5	5.8426	10.5003	7.0968	10.5002	7.0359	10.5	6.50505
10.5085	0.742051	10.5085	1.076	10.5087	6.86825	10.5087	6.77575	10.5083	5.8205	10.5087	7.00785	10.5085	6.94765	10.5083	6.43385
10.5168	0.73355	10.5168	1.06835	10.517	6.7766	10.517	6.68085	10.5167	5.7985	10.517	6.91905	10.5168	6.85705	10.5167	6.36225
10.5252	0.725	10.5252	1.0592	10.5253	6.685	10.5253	6.5821	10.525	5.7758	10.5253	6.8259	10.5252	6.76465	10.525	6.2891
10.5335	0.7111	10.5335	1.0469	10.5337	6.59505	10.5337	6.48455	10.5333	5.7531	10.5337	6.7352	10.5335	6.6718	10.5333	6.21805
10.5418	0.697	10.5418	1.0308	10.542	6.5021	10.542	6.38695	10.5417	5.7292	10.542	6.6414	10.5418	6.5787	10.5417	6.1446
10.5502	0.6823	10.5502	1.01905	10.5503	6.4095	10.5503	6.2869	10.55	5.7095	10.5503	6.5484	10.5502	6.48455	10.55	6.0725
10.5585	0.6656	10.5585	1.0011	10.5587	6.31555	10.5587	6.18535	10.5583	5.6861	10.5587	6.4537	10.5585	6.38835	10.5583	5.99915
10.5668	0.6421	10.5668	0.980951	10.567	6.2207	10.567	6.08355	10.5667	5.6636	10.567	6.3582	10.5668	6.29395	10.5667	5.9231
10.5752	0.62045	10.5752	0.959701	10.5753	6.12575	10.5753	5.9789	10.575	5.6424	10.5753	6.2645	10.5752	6.19825	10.575	5.84905
10.5835	0.5964	10.5835	0.934051	10.5837	6.02955	10.5837	5.8729	10.5833	5.61925	10.5837	6.16725	10.5835	6.1019	10.5833	5.7732
10.5918	0.57325	10.5918	0.911301	10.592	5.93275	10.592	5.768	10.5917	5.59495	10.592	6.06655	10.5918	6.0044	10.5917	5.6997
10.6002	0.55015	10.6002	0.888651	10.6003	5.83485	10.6003	5.66015	10.6	5.57005	10.6003	5.97165	10.6002	5.90565	10.6	5.623
10.6085	0.5255	10.6085	0.867201	10.6087	5.73575	10.6087	5.5528	10.6083	5.5465	10.6087	5.87145	10.6085	5.80785	10.6083	5.5476
10.6168	0.50115	10.6168	0.841801	10.617	5.6393	10.617	5.4453	10.6167	5.5215	10.617	5.77555	10.6168	5.71195	10.6167	5.46925
10.6252	0.4753	10.6252	0.818601	10.6253	5.5407	10.6253	5.33745	10.625	5.496	10.6253	5.6748	10.6252	5.61395	10.625	5.39145
10.6335	0.4558	10.6335	0.799951	10.6337	5.44215	10.6337	5.23075	10.6333	5.47095	10.6337	5.57655	10.6335	5.51685	10.6333	5.31295
10.6418	0.43285	10.6418	0.775351	10.642	5.3461	10.642	5.12165	10.6417	5.4448	10.642	5.4807	10.6418	5.4215	10.6417	5.2323
10.6502	0.4145	10.6502	0.755251	10.6503	5.24755	10.6503	5.01465	10.65	5.4171	10.6503	5.3803	10.6502	5.3223	10.65	5.15525
10.6585	0.397	10.6585	0.739651	10.6587	5.14935	10.6587	4.90505	10.6583	5.39135	10.6587	5.2817	10.6585	5.22545	10.6583	5.0751
10.6668	0.3794	10.6668	0.721751	10.667	5.0527	10.667	4.7982	10.6667	5.3607	10.667	5.18565	10.6668	5.1328	10.6667	4.9941
10.6752	0.36645	10.6752	0.705051	10.6753	4.95665	10.6753	4.6906	10.675	5.3298	10.6753	5.08915	10.6752	5.03775	10.675	4.91175
10.6835	0.35305	10.6835	0.691251	10.6837	4.86125	10.6837	4.5835	10.6833	5.30085	10.6837	4.99305	10.6835	4.9454	10.6833	4.83365
10.6918	0.3401	10.6918	0.678551	10.692	4.76625	10.692	4.47845	10.6917	5.26965	10.692	4.9002	10.6918	4.8515	10.6917	4.75315
10.7002	0.3302	10.7002	0.669101	10.7003	4.67165	10.7003	4.37365	10.7	5.2396	10.7003	4.8011	10.7002	4.75965	10.7	4.6738
10.7085	0.32345	10.7085	0.662801	10.7087	4.5773	10.7087	4.26935	10.7083	5.2073	10.7087	4.6523	10.7085	4.6694	10.7083	4.59475
10.7168	0.31465	10.7168	0.6515	10.717	4.4845	10.717	4.1652	10.7167	5.1749	10.717	4.64965	10.7168	4.5794	10.7167	4.5163
10.7252	0.30845	10.7252	0.6457	10.7253	4.3923	10.7253	4.06515	10.725	5.14245	10.7253	4.54	10.7252	4.48905	10.725	4.4389
10.7335	0.3032	10.7335	0.6389	10.7337	4.30205	10.7337	3.9636	10.7333	5.1082	10.7337	4.3802	10.7335	4.4028	10.7333	4.36295
10.7418	0.29855	10.7418	0.6337	10.742	4.2112	10.742	3.86385	10.7417	5.07565	10.742	4.3228	10.7418	4.31625	10.7417	4.28845
10.7502	0.29375	10.7502	0.62885	10.7503	4.12365	10.7503	3.76705	10.75	5.04395	10.7503	4.2434	10.7502	4.23235	10.75	4.21525
10.7585	0.29195	10.7585	0.6257	10.7587	4.03825	10.7587	3.671	10.7583	5.009	10.7587	4.16215	10.7585	4.14945	10.7583	4.14255
10.7668	0.2882	10.7668	0.6218	10.767	3.95445	10.767	3.57315	10.7667	4.9777	10.767	4.09335	10.7668	4.071	10.7667	4.0714
10.7752	0.2848	10.7752	0.62125	10.7753	3.8692	10.7753	3.47855	10.775	4.94255	10.7753	4.05825	10.7752	3.98965	10.775	4.00105
10.7835	0.28235	10.7835	0.62185	10.7837	3.7871	10.7837	3.3895	10.7833	4.90595	10.7837	3.79625	10.7835	3.91085	10.7833	3.93365
10.7918	0.2802	10.7918	0.61905	10.792	3.7066	10.792	3.2962	10.7917	4.87085	10.792	3.79855	10.7918	3.8351	10.7917	3.8664
10.8002	0.2756	10.8002	0.6201	10.8003	3.626	10.8003	3.2099	10.8	4.8377	10.8003	3.76185	10.8002	3.7609	10.8	3.8005
10.8085	0.27835	10.8085	0.62465	10.8087	3.5497	10.8087	3.12155	10.8083	4.79975	10.8087	3.68025	10.8085	3.687	10.8083	3.7347
10.8168	0.2739	10.8168	0.624701	10.817	3.4724	10.817	3.0375	10.8167	4.76415	10.817	3.6003	10.8168	3.61355	10.8167	3.6716
10.8252	0.2732	10.8252	0.628751	10.8253	3.3996	10.8253	2.9522	10.825	4.7285	10.8253	3.5258	10.8252	3.54375	10.825	3.60825
10.8335	0.27285	10.8335	0.634851	10.8337	3.3266	10.8337	2.8713	10.8333	4.69295	10.8337	3.4539	10.8335	3.4756	10.8333	3.5452
10.8418	0.27145	10.8418	0.637951	10.842	3.25735	10.842	2.7932	10.8417	4.65845	10.842	3.3828	10.8418	3.408	10.8417	3.4845
10.8502	0.27175	10.8502	0.647551	10.8503	3.1872	10.8503	2.7145	10.85	4.6185	10.8503	3.313	10.8502	3.3429	10.85	3.4239
10.8585	0.2706	10.8585	0.655201	10.8587	3.1188	10.8587	2.64075	10.8583	4.581	10.8587	3.2457	10.8585	3.27955	10.8583	3.3653
10.8668	0.26835	10.8668	0.660451	10.867	3.05205	10.867	2.56685	10.8667	4.5457	10.867	3.1808	10.8668	3.2174	10.8667	3.30535
10.8752	0.2688	10.8752	0.669601	10.8753	2.98935	10.8753	2.49835	10.875	4.5073	10.8753	3.1167	10.8752	3.15575	10.875	3.24795
10.8835	0.2668	10.8835	0.679351	10.8837	2.9283	10.8837	2.4291	10.8833	4.46895	10.8837	3.05465	10.8835	3.0966	10.8833	3.19285
10.8918	0.2666	10.8918	0.691751	10.892	2.86385	10.892	2.36435	10.8917	4.4304	10.892	2.9931	10.8918	3.0393	10.8917	3.13725
10.9002	0.2676	10.9002	0.701751	10.9003	2.8081	10.9003	2.2991	10.9	4.392	10.9003	2.9362	10.9002	2.98555	10.9	3.0823
10.9085	0.2655	10.9085	0.712001	10.9087	2.75085	10.9087	2.2352	10.9083	4.3545	10.9087	2.8791	10.9085	2.93135	10.9083	3.0284
10.9168	0.2656	10.9168	0.724501	10.917	2.6949	10.917	2.17805	10.9167	4.3143	10.917	2.8242	10.9168	2.8794	10.9167	2.97255
10.9252	0.26395	10.9252	0.736501	10.9253	2.6395	10.9253	2.1206	10.925	4.27655	10.9253	2.7708	10.9252	2.82805	10.925	2.91985
10.9335	0.2667	10.9335	0.750101	10.9337	2.58825	10.9337	2.06585	10.9333	4.23725	10.9337	2.71785	10.9335	2.7787	10.9333	2.86645
10.9418	0.26395	10.9418	0.764451	10.942	2.537	10.942	2.01355	10.9417	4.19805	10.942	2.66755	10.9418	2.73155	10.9417	2.8158
10.9502	0.2636	10.9502	0.777601	10.9503	2.48705	10.9503	1.9625	10.95	4.1598	10.9503	2.619	10.9502	2.6857	10.95	2.7651
10.9585	0.26115	10.9585	0.790451	10.9587	2.4396	10.9587	1.9136	10.9583	4.12245	10.9587	2.57175	10.9585	2.64185	10.9583	2.71595
10.9668	0.2635	10.9668	0.805251	10.967	2.39255	10.967	1.8685	10.9667	4.0822	10.967	2.52065	10.9668	2.5973	10.9667	2.6687
10.9752	0.26305	10.9752	0.818851	10.9753	2.34675	10.9753	1.82285	10.975	4.0431	10.9753	2.48125	10.9752	2.5556	10.975	2.6191
10.9835	0.26435	10.9835	0.833401	10.9837	2.30455	10.9837	1.78105	10.9833	4.00395	10.9837	2.438	10.9835	2.5158	10.9833	2.5739
10.9918	0.2626	10.9918	0.848251	10.992	2.263	10.992	1.7405	10.9917	3.96415	10.992	2.39525	10.9918	2.476	10.9917	2.5272
11.0002	0.26155	11.0002	0.860151	11.0003	2.22295	11.0003	1.70285	11	3.9251	11.0003	2.3554	11.0002	2.43975	11	2.4824
11.0085	0.2604	11.0085	0.873551	11.0087	2.18315	11.0087	1.6628	11.0083	3.8861	11.0087	2.31555	11.0085	2.40285	11.0083	2.44205
11.0168	0.2611	11.0168	0.890001	11.017	2.14815	11.017	1.6292	11.0167	3.8469	11.017	2.28085	11.0168	2.37045	11.0167	2.3992
11.0252	0.2607	11.0252	0.907501	11.0253	2.10975	11.0253	1.5959	11.025	3.8083	11.0253	2.2448	11.0252	2.33625	11.025	2.35765
11.0335	0.2607	11.0335	0.923351	11.0337	2.0744	11.0337	1.5631	11.0333	3.767	11.0337	2.20845	11.0335	2.3029	11.0333	2.31855
11.0418	0.25915	11.0418	0.940401	11.042	2.0432	11.042	1.5328	11.0417	3.727	11.042	2.1768	11.0418	2.2744	11.0417	2.2789
11.0502	0.26105	11.0502	0.957601	11.0503	2.01135	11.0503	1.50345	11.05	3.687	11.0503	2.1453	11.0502	2.24535	11.05	2.2418
11.0585	0.2586	11.0585	0.973501	11.0587	1.97835	11.0587	1.47415	11.0583	3.64725	11.0587	2.11225	11.0585	2.2148	11.0583	2.20535
11.0668	0.26005	11.0668	0.992451	11.067	1.94715	11.067	1.44715	11.0667	3.608	11.067	2.0825	11.0668	2.18735	11.0667	2.1683
11.0752	0.2582	11.0752	1.0076	11.0753	1.91685	11.0753	1.42305	11.075	3.5657	11.0753	2.0548	11.0752	2.1592	11.075	2.1348
11.0835	0.2577	11.0835	1.02	11.0837	1.8899	11.0837	1.39895	11.0833	3.52655	11.0837	2.0291	11.0835	2.1358	11.0833	2.1035
11.0918	0.2587	11.0918	1.0347	11.092	1.86145	11.092	1.3752	11.0917	3.4859	11.092	2.00105	11.0918	2.10915	11.0917	2.0697
11.1002	0.2552	11.1002	1.04105	11.1003	1.83745	11.1003	1.3526	11.1	3.4441	11.1003	1.977	11.1002	2.0868	11.1	2.03905
11.1085	0.2556	11.1085	1.0474	11.1087	1.811	11.1087	1.33065	11.1083	3.4058	11.1087	1.9524	11.1085	2.06345	11.1083	2.00735
11.1168	0.255	11.1168	1.0491	11.117	1.7856	11.117	1.3105	11.1167	3.36315	11.117	1.9272	11.1168	2.039	11.1167	1.9791
11.1252	0.2574	11.1252	1.0498	11.1253	1.76235	11.1253	1.29225	11.125	3.3245	11.1253	1.90425	11.1252	2.017	11.125	1.94825
11.1335	0.25575	11.1335	1.04295	11.1337	1.74255	11.1337	1.27435	11.1333	3.2851	11.1337	1.8851	11.1335	2.0008	11.1333	1.9207
11.1418	0.25375	11.1418	1.0366	11.142	1.719	11.142	1.2561	11.1417	3.2484	11.142	1.86355	11.1418	1.9789	11.1417	1.89555
11.1502	0.2538	11.1502	1.026	11.1503	1.69845	11.1503	1.23955	11.15	3.2105	11.1503	1.84285	11.1502	1.95965	11.15	1.8718
11.1585	0.25585	11.1585	1.0134	11.1587	1.67975	11.1587	1.222	11.1583	3.17225	11.1587	1.82295	11.1585	1.94075	11.1583	1.84565
11.1668	0.25475	11.1668	0.995951	11.167	1.6583	11.167	1.2065	11.1667	3.134	11.167	1.8051	11.1668	1.9234	11.1667	1.8212
11.1752	0.2534	11.1752	0.976751	11.1753	1.6397	11.1753	1.1918	11.175	3.09655	11.1753	1.78655	11.1752	1.90625	11.175	1.79825
11.1835	0.2529	11.1835	0.957001	11.1837	1.62215	11.1837	1.1783	11.1833	3.0597	11.1837	1.76795	11.1835	1.88965	11.1833	1.7741
11.1918	0.25335	11.1918	0.935451	11.192	1.60325	11.192	1.16555	11.1917	3.0238	11.192	1.75155	11.1918	1.87195	11.1917	1.7537
11.2002	0.252	11.2002	0.913101	11.2003	1.5871	11.2003	1.15135	11.2	2.98705	11.2003	1.7358	11.2002	1.85825	11.2	1.7326
11.2085	0.2509	11.2085	0.889801	11.2087	1.5711	11.2087	1.13905	11.2083	2.9527	11.2087	1.7188	11.2085	1.8426	11.2083	1.7121
11.2168	0.2518	11.2168	0.870401	11.217	1.55715	11.217	1.128	11.2167	2.92085	11.217	1.7044	11.2168	1.82835	11.2167	1.69115
11.2252	0.25195	11.2252	0.847651	11.2253	1.54205	11.2253	1.1155	11.225	2.88695	11.2253	1.69175	11.2252	1.81565	11.225	1.6736
11.2335	0.2507	11.2335	0.827051	11.2337	1.52725	11.2337	1.10385	11.2333	2.85175	11.2337	1.6783	11.2335	1.8024	11.2333	1.65415
11.2418	0.25015	11.2418	0.806401	11.242	1.51205	11.242	1.09455	11.2417	2.82035	11.242	1.663	11.2418	1.78945	11.2417	1.6355
11.2502	0.25085	11.2502	0.788001	11.2503	1.4988	11.2503	1.0825	11.25	2.7881	11.2503	1.64925	11.2502	1.7765	11.25	1.619
11.2585	0.2489	11.2585	0.768151	11.2587	1.4855	11.2587	1.0737	11.2583	2.75625	11.2587	1.638	11.2585	1.76385	11.2583	1.6016
11.2668	0.2496	11.2668	0.749401	11.267	1.471	11.267	1.06405	11.2667	2.72805	11.267	1.6251	11.2668	1.7527	11.2667	1.5865
11.2752	0.2498	11.2752	0.735551	11.2753	1.4579	11.2753	1.05545	11.275	2.69735	11.2753	1.61185	11.2752	1.7519	11.275	1.5721
11.2835	0.24835	11.2835	0.718751	11.2837	1.44675	11.2837	1.04625	11.2833	2.66855	11.2837	1.60075	11.2835	1.73	11.2833	1.55505
11.2918	0.24915	11.2918	0.704051	11.292	1.4331	11.292	1.0376	11.2917	2.6399	11.292	1.58945	11.2918	1.71815	11.2917	1.539
11.3002	0.2488	11.3002	0.691951	11.3003	1.42045	11.3003	1.0294	11.3	2.6139	11.3003	1.5783	11.3002	1.7078	11.3	1.5267
11.3085	0.24765	11.3085	0.679151	11.3087	1.40925	11.3087	1.02145	11.3083	2.58995	11.3087	1.56675	11.3085	1.6959	11.3083	1.51565
11.3168	0.24825	11.3168	0.670451	11.317	1.39835	11.317	1.0144	11.3167	2.5652	11.317	1.55745	11.3168	1.687	11.3167	1.50215
11.3252	0.2492	11.3252	0.658451	11.3253	1.38745	11.3253	1.0061	11.325	2.54175	11.3253	1.54695	11.3252	1.6791	11.325	1.4909
11.3335	0.24825	11.3335	0.648201	11.3337	1.37835	11.3337	1.00155	11.3333	2.5199	11.3337	1.53865	11.3335	1.6702	11.3333	1.4768
11.3418	0.24705	11.3418	0.639901	11.342	1.36625	11.342	0.995151	11.3417	2.50045	11.342	1.5271	11.3418	1.6606	11.3417	1.46675
11.3502	0.2492	11.3502	0.632451	11.3503	1.3574	11.3503	0.988551	11.35	2.48015	11.3503	1.51885	11.3502	1.65195	11.35	1.45365
11.3585	0.24775	11.3585	0.626751	11.3587	1.3464	11.3587	0.979151	11.3583	2.4599	11.3587	1.50855	11.3585	1.64215	11.3583	1.4452
11.3668	0.2482	11.3668	0.618051	11.367	1.34095	11.367	0.975001	11.3667	2.44405	11.367	1.5003	11.3668	1.6369	11.3667	1.43255
11.3752	0.2469	11.3752	0.611351	11.3753	1.32795	11.3753	0.966451	11.375	2.4251	11.3753	1.4919	11.3752	1.6271	11.375	1.423
11.3835	0.2482	11.3835	0.607751	11.3837	1.31725	11.3837	0.962151	11.3833	2.41065	11.3837	1.48415	11.3835	1.6196	11.3833	1.4129
11.3918	0.2471	11.3918	0.600801	11.392	1.30865	11.392	0.956351	11.3917	2.3935	11.392	1.47545	11.3918	1.6104	11.3917	1.4044
11.4002	0.24655	11.4002	0.594001	11.4003	1.3031	11.4003	0.951651	11.4	2.3797	11.4003	1.4682	11.4002	1.60505	11.4	1.3953
11.4085	0.2475	11.4085	0.589151	11.4087	1.29285	11.4087	0.946251	11.4083	2.3662	11.4087	1.4605	11.4085	1.5954	11.4083	1.3839
11.4168	0.2496	11.4168	0.585201	11.417	1.28525	11.417	0.941351	11.4167	2.35325	11.417	1.45285	11.4168	1.5897	11.4167	1.3758
11.4252	0.2483	11.4252	0.580451	11.4253	1.2766	11.4253	0.934651	11.425	2.3404	11.4253	1.4448	11.4252	1.5835	11.425	1.36925
11.4335	0.2492	11.4335	0.578201	11.4337	1.2691	11.4337	0.931201	11.4333	2.3319	11.4337	1.4394	11.4335	1.5785	11.4333	1.36275
11.4418	0.24825	11.4418	0.572901	11.442	1.26185	11.442	0.925001	11.4417	2.32485	11.442	1.4332	11.4418	1.5716	11.4417	1.35215
11.4502	0.24915	11.4502	0.570551	11.4503	1.25425	11.4503	0.923701	11.45	2.3175	11.4503	1.4228	11.4502	1.56305	11.45	1.3434
11.4585	0.24775	11.4585	0.567601	11.4587	1.24775	11.4587	0.916551	11.4583	2.3145	11.4587	1.41935	11.4585	1.55965	11.4583	1.3365
11.4668	0.2491	11.4668	0.564401	11.467	1.2404	11.467	0.911801	11.4667	2.31	11.467	1.41125	11.4668	1.5521	11.4667	1.32695
11.4752	0.2488	11.4752	0.559601	11.4753	1.2321	11.4753	0.907651	11.475	2.3121	11.4753	1.40665	11.4752	1.54625	11.475	1.3218
11.4835	0.2496	11.4835	0.556901	11.4837	1.2237	11.4837	0.903901	11.4833	2.31725	11.4837	1.39735	11.4835	1.54015	11.4833	1.3139
11.4918	0.2501	11.4918	0.554901	11.492	1.2189	11.492	0.898651	11.4917	2.3207	11.492	1.3934	11.4918	1.5355	11.4917	1.30695
11.5002	0.2494	11.5002	0.552051	11.5003	1.2128	11.5003	0.894451	11.5	2.32855	11.5003	1.38935	11.5002	1.53035	11.5	1.29925
11.5085	0.24855	11.5085	0.550701	11.5087	1.20565	11.5087	0.890851	11.5083	2.3377	11.5087	1.3857	11.5085	1.5254	11.5083	1.29225
11.5168	0.24845	11.5168	0.547401	11.517	1.19935	11.517	0.886101	11.5167	2.3482	11.517	1.3961	11.5168	1.5209	11.5167	1.2867
11.5252	0.24875	11.5252	0.546351	11.5253	1.1911	11.5253	0.884451	11.525	2.3601	11.5253	1.38755	11.5252	1.51355	11.525	1.27965
11.5335	0.24925	11.5335	0.542651	11.5337	1.18965	11.5337	0.880301	11.5333	2.37105	11.5337	1.3388	11.5335	1.51275	11.5333	1.27455
11.5418	0.2499	11.5418	0.540001	11.542	1.18435	11.542	0.878201	11.5417	2.38255	11.542	1.3571	11.5418	1.51045	11.5417	1.26955
11.5502	0.24905	11.5502	0.537901	11.5503	1.1773	11.5503	0.874051	11.55	2.39445	11.5503	1.3557	11.5502	1.5053	11.55	1.2627
11.5585	0.2491	11.5585	0.536401	11.5587	1.1734	11.5587	0.870901	11.5583	2.4048	11.5587	1.3514	11.5585	1.502	11.5583	1.25925
11.5668	0.25025	11.5668	0.534301	11.567	1.16595	11.567	0.867301	11.5667	2.41515	11.567	1.3483	11.5668	1.49925	11.5667	1.2527
11.5752	0.2502	11.5752	0.532001	11.5753	1.16415	11.5753	0.863951	11.575	2.426	11.5753	1.34485	11.5752	1.4965	11.575	1.24575
11.5835	0.24785	11.5835	0.527701	11.5837	1.1605	11.5837	0.862701	11.5833	2.43775	11.5837	1.33915	11.5835	1.49395	11.5833	1.242
11.5918	0.2484	11.5918	0.527801	11.592	1.1564	11.592	0.859101	11.5917	2.44625	11.592	1.33805	11.5918	1.49115	11.5917	1.23705
11.6002	0.24595	11.6002	0.523351	11.6003	1.1539	11.6003	0.856651	11.6	2.45255	11.6003	1.33475	11.6002	1.4879	11.6	1.2332
11.6085	0.2477	11.6085	0.522801	11.6087	1.14915	11.6087	0.855851	11.6083	2.45965	11.6087	1.33065	11.6085	1.4868	11.6083	1.22745
11.6168	0.24885	11.6168	0.521601	11.617	1.1459	11.617	0.852601	11.6167	2.4689	11.617	1.32855	11.6168	1.4841	11.6167	1.22665
11.6252	0.2501	11.6252	0.518351	11.6253	1.1409	11.6253	0.849701	11.625	2.4733	11.6253	1.3263	11.6252	1.48285	11.625	1.2213
11.6335	0.2475	11.6335	0.518501	11.6337	1.1403	11.6337	0.844201	11.6333	2.47735	11.6337	1.32395	11.6335	1.4794	11.6333	1.21715
11.6418	0.24875	11.6418	0.515651	11.642	1.13585	11.642	0.845401	11.6417	2.47995	11.642	1.32135	11.6418	1.48015	11.6417	1.216
11.6502	0.2476	11.6502	0.513251	11.6503	1.13515	11.6503	0.843951	11.65	2.48325	11.6503	1.3201	11.6502	1.4799	11.65	1.21335
11.6585	0.2464	11.6585	0.513101	11.6587	1.13285	11.6587	0.84155	11.6583	2.48315	11.6587	1.317	11.6585	1.47885	11.6583	1.2104
11.6668	0.24685	11.6668	0.511601	11.667	1.1323	11.667	0.8415	11.6667	2.48415	11.667	1.3165	11.6668	1.47795	11.6667	1.20585
11.6752	0.2481	11.6752	0.509001	11.6753	1.1296	11.6753	0.83915	11.675	2.48415	11.6753	1.3138	11.6752	1.4772	11.675	1.20405
11.6835	0.24765	11.6835	0.507051	11.6837	1.12765	11.6837	0.83995	11.6833	2.48145	11.6837	1.3146	11.6835	1.4747	11.6833	1.2024
11.6918	0.2468	11.6918	0.507151	11.692	1.1248	11.692	0.83795	11.6917	2.48005	11.692	1.3142	11.6918	1.4749	11.6917	1.1997
11.7002	0.2449	11.7002	0.502751	11.7003	1.12265	11.7003	0.8356	11.7	2.4778	11.7003	1.3096	11.7002	1.4753	11.7	1.2008
11.7085	0.2471	11.7085	0.502801	11.7087	1.1225	11.7087	0.8344	11.7083	2.47565	11.7087	1.3101	11.7085	1.47465	11.7083	1.19955
11.7168	0.2463	11.7168	0.502051	11.717	1.12385	11.717	0.83525	11.7167	2.4726	11.717	1.3059	11.7168	1.4747	11.7167	1.1974
11.7252	0.244601	11.7252	0.498051	11.7253	1.12485	11.7253	0.833	11.725	2.46795	11.7253	1.3064	11.7252	1.47555	11.725	1.19685
11.7335	0.245201	11.7335	0.496851	11.7337	1.1228	11.7337	0.83295	11.7333	2.4633	11.7337	1.30565	11.7335	1.47635	11.7333	1.1971
11.7418	0.245551	11.7418	0.496101	11.742	1.12595	11.742	0.8299	11.7417	2.4607	11.742	1.3053	11.7418	1.47645	11.7417	1.19465
11.7502	0.244451	11.7502	0.494601	11.7503	1.12535	11.7503	0.83095	11.75	2.45435	11.7503	1.30475	11.7502	1.478	11.75	1.1972
11.7585	0.243751	11.7585	0.492551	11.7587	1.1245	11.7587	0.82655	11.7583	2.4491	11.7587	1.30345	11.7585	1.47525	11.7583	1.19505
11.7668	0.243351	11.7668	0.492151	11.767	1.1256	11.767	0.82415	11.7667	2.4449	11.767	1.30235	11.7668	1.4781	11.7667	1.19505
11.7752	0.241501	11.7752	0.491451	11.7753	1.1289	11.7753	0.8255	11.775	2.43915	11.7753	1.3048	11.7752	1.47955	11.775	1.1954
11.7835	0.241401	11.7835	0.492901	11.7837	1.1286	11.7837	0.8233	11.7833	2.43335	11.7837	1.30265	11.7835	1.4804	11.7833	1.1923
11.7918	0.242301	11.7918	0.496351	11.792	1.1302	11.792	0.82105	11.7917	2.42715	11.792	1.30395	11.7918	1.48075	11.7917	1.19395
11.8002	0.239301	11.8002	0.496151	11.8003	1.13315	11.8003	0.81885	11.8	2.42055	11.8003	1.3047	11.8002	1.4844	11.8	1.1916
11.8085	0.240751	11.8085	0.497701	11.8087	1.1347	11.8087	0.81755	11.8083	2.41525	11.8087	1.30695	11.8085	1.4849	11.8083	1.1912
11.8168	0.239151	11.8168	0.500651	11.817	1.1386	11.817	0.8121	11.8167	2.40805	11.817	1.3082	11.8168	1.48505	11.8167	1.191
11.8252	0.238101	11.8252	0.505851	11.8253	1.1415	11.8253	0.811	11.825	2.4002	11.8253	1.3095	11.8252	1.48985	11.825	1.1899
11.8335	0.237451	11.8335	0.510351	11.8337	1.14415	11.8337	0.80925	11.8333	2.3942	11.8337	1.3108	11.8335	1.49035	11.8333	1.18985
11.8418	0.236401	11.8418	0.519151	11.842	1.1501	11.842	0.80665	11.8417	2.3858	11.842	1.3132	11.8418	1.4928	11.8417	1.1914
11.8502	0.232301	11.8502	0.523801	11.8503	1.15425	11.8503	0.80545	11.85	2.37985	11.8503	1.3157	11.8502	1.49815	11.85	1.18675
11.8585	0.235401	11.8585	0.535751	11.8587	1.15765	11.8587	0.802	11.8583	2.372	11.8587	1.31765	11.8585	1.50145	11.8583	1.1843
11.8668	0.233351	11.8668	0.542801	11.867	1.1639	11.867	0.801	11.8667	2.36695	11.867	1.32145	11.8668	1.50755	11.8667	1.185
11.8752	0.234001	11.8752	0.555651	11.8753	1.17115	11.8753	0.7988	11.875	2.35925	11.8753	1.32435	11.8752	1.5116	11.875	1.18305
11.8835	0.232551	11.8835	0.566251	11.8837	1.1778	11.8837	0.7946	11.8833	2.3527	11.8837	1.3292	11.8835	1.5178	11.8833	1.18025
11.8918	0.231401	11.8918	0.577201	11.892	1.1884	11.892	0.7934	11.8917	2.34685	11.892	1.3373	11.8918	1.52855	11.8917	1.18155
11.9002	0.229401	11.9002	0.587601	11.9003	1.1973	11.9003	0.79165	11.9	2.33945	11.9003	1.34215	11.9002	1.53415	11.9	1.1783
11.9085	0.233201	11.9085	0.601701	11.9087	1.20445	11.9087	0.7878	11.9083	2.33305	11.9087	1.3487	11.9085	1.5405	11.9083	1.1769
11.9168	0.232001	11.9168	0.610901	11.917	1.2161	11.917	0.78525	11.9167	2.32505	11.917	1.35855	11.9168	1.55265	11.9167	1.17615
11.9252	0.231151	11.9252	0.618151	11.9253	1.22575	11.9253	0.78435	11.925	2.31775	11.9253	1.3662	11.9252	1.56225	11.925	1.1753
11.9335	0.230351	11.9335	0.628551	11.9337	1.23465	11.9337	0.78015	11.9333	2.3098	11.9337	1.37155	11.9335	1.56855	11.9333	1.1736
11.9418	0.227851	11.9418	0.633001	11.942	1.2472	11.942	0.7789	11.9417	2.3043	11.942	1.38275	11.9418	1.58135	11.9417	1.17465
11.9502	0.227101	11.9502	0.638951	11.9503	1.25755	11.9503	0.77755	11.95	2.2979	11.9503	1.39305	11.9502	1.5913	11.95	1.1717
11.9585	0.226551	11.9585	0.644951	11.9587	1.2683	11.9587	0.776	11.9583	2.2904	11.9587	1.4027	11.9585	1.6027	11.9583	1.17345
11.9668	0.228301	11.9668	0.646551	11.967	1.28025	11.967	0.7734	11.9667	2.2842	11.967	1.41035	11.9668	1.6128	11.9667	1.17505
11.9752	0.227751	11.9752	0.649501	11.9753	1.2919	11.9753	0.77385	11.975	2.2759	11.9753	1.4238	11.9752	1.6267	11.975	1.17985
11.9835	0.227451	11.9835	0.651151	11.9837	1.30425	11.9837	0.7734	11.9833	2.26645	11.9837	1.4368	11.9835	1.638	11.9833	1.1804
11.9918	0.227601	11.9918	0.650101	11.992	1.31275	11.992	0.7728	11.9917	2.2584	11.992	1.44845	11.9918	1.64965	11.9917	1.18195
12.0002	0.229351	12.0002	0.650201	12.0003	1.3241	12.0003	0.77085	12	2.25075	12.0003	1.4601	12.0002	1.6613	12	1.18825
12.0085	0.227001	12.0085	0.648451	12.0087	1.3347	12.0087	0.7723	12.0083	2.2424	12.0087	1.4706	12.0085	1.66985	12.0083	1.18965
12.0168	0.227051	12.0168	0.648001	12.017	1.346	12.017	0.77305	12.0167	2.2361	12.017	1.4822	12.0168	1.6828	12.0167	1.19475
12.0252	0.225251	12.0252	0.644951	12.0253	1.35475	12.0253	0.7744	12.025	2.227	12.0253	1.49245	12.0252	1.6924	12.025	1.1999
12.0335	0.226001	12.0335	0.643901	12.0337	1.3638	12.0337	0.7762	12.0333	2.21885	12.0337	1.5025	12.0335	1.7026	12.0333	1.2051
12.0418	0.228201	12.0418	0.642501	12.042	1.37365	12.042	0.77905	12.0417	2.20875	12.042	1.51225	12.0418	1.71325	12.0417	1.2106
12.0502	0.226701	12.0502	0.640551	12.0503	1.381	12.0503	0.7818	12.05	2.20155	12.0503	1.52185	12.0502	1.72295	12.05	1.21945
12.0585	0.229301	12.0585	0.637951	12.0587	1.3902	12.0587	0.7868	12.0583	2.193	12.0587	1.53325	12.0585	1.733	12.0583	1.22795
12.0668	0.229601	12.0668	0.636851	12.067	1.39815	12.067	0.79225	12.0667	2.18275	12.067	1.55125	12.0668	1.74245	12.0667	1.23645
12.0752	0.230851	12.0752	0.634351	12.0753	1.40555	12.0753	0.7977	12.075	2.17715	12.0753	1.54875	12.0752	1.74895	12.075	1.24305
12.0835	0.229601	12.0835	0.631701	12.0837	1.41205	12.0837	0.804	12.0833	2.17185	12.0837	1.5583	12.0835	1.75655	12.0833	1.2524
12.0918	0.231301	12.0918	0.632451	12.092	1.4193	12.092	0.80965	12.0917	2.1646	12.092	1.5567	12.0918	1.7652	12.0917	1.26015
12.1002	0.233551	12.1002	0.632501	12.1003	1.42385	12.1003	0.81765	12.1	2.15515	12.1003	1.56915	12.1002	1.7705	12.1	1.27215
12.1085	0.237201	12.1085	0.632501	12.1087	1.4287	12.1087	0.8286	12.1083	2.14865	12.1087	1.58965	12.1085	1.7767	12.1083	1.27935
12.1168	0.238601	12.1168	0.635101	12.117	1.43545	12.117	0.83645	12.1167	2.14105	12.117	1.58815	12.1168	1.7854	12.1167	1.28855
12.1252	0.243301	12.1252	0.637701	12.1253	1.4394	12.1253	0.8481	12.125	2.13475	12.1253	1.5922	12.1252	1.78905	12.125	1.2968
12.1335	0.250851	12.1335	0.641051	12.1337	1.44385	12.1337	0.8615	12.1333	2.12855	12.1337	1.59805	12.1335	1.7945	12.1333	1.30525
12.1418	0.257351	12.1418	0.646001	12.142	1.44725	12.142	0.87315	12.1417	2.12425	12.142	1.60335	12.1418	1.8002	12.1417	1.3135
12.1502	0.271651	12.1502	0.654901	12.1503	1.45225	12.1503	0.88595	12.15	2.11895	12.1503	1.60705	12.1502	1.8036	12.15	1.32225
12.1585	0.287751	12.1585	0.666901	12.1587	1.4553	12.1587	0.8996	12.1583	2.11415	12.1587	1.61275	12.1585	1.8086	12.1583	1.3295
12.1668	0.310601	12.1668	0.683501	12.167	1.4571	12.167	0.91235	12.1667	2.11075	12.167	1.6151	12.1668	1.8113	12.1667	1.3396
12.1752	0.332851	12.1752	0.704151	12.1753	1.462	12.1753	0.92685	12.175	2.1053	12.1753	1.61855	12.1752	1.8158	12.175	1.34845
12.1835	0.366201	12.1835	0.729601	12.1837	1.464	12.1837	0.94175	12.1833	2.10085	12.1837	1.62335	12.1835	1.82105	12.1833	1.3549
12.1918	0.405801	12.1918	0.763451	12.192	1.4661	12.192	0.95555	12.1917	2.09555	12.192	1.62565	12.1918	1.82155	12.1917	1.36265
12.2002	0.448701	12.2002	0.800751	12.2003	1.4696	12.2003	0.9719	12.2	2.09295	12.2003	1.62985	12.2002	1.8247	12.2	1.37
12.2085	0.502901	12.2085	0.846051	12.2087	1.4746	12.2087	0.98455	12.2083	2.08805	12.2087	1.6341	12.2085	1.8292	12.2083	1.3765
12.2168	0.561101	12.2168	0.897301	12.217	1.47435	12.217	1.00235	12.2167	2.0837	12.217	1.63595	12.2168	1.83145	12.2167	1.3814
12.2252	0.627301	12.2252	0.956851	12.2253	1.47715	12.2253	1.0167	12.225	2.07885	12.2253	1.6386	12.2252	1.83195	12.225	1.38865
12.2335	0.696551	12.2335	1.0214	12.2337	1.4807	12.2337	1.02955	12.2333	2.0781	12.2337	1.64285	12.2335	1.83695	12.2333	1.3913
12.2418	0.774401	12.2418	1.0896	12.242	1.47915	12.242	1.04385	12.2417	2.0751	12.242	1.6418	12.2418	1.8372	12.2417	1.39915
12.2502	0.85055	12.2502	1.16005	12.2503	1.48105	12.2503	1.0568	12.25	2.0745	12.2503	1.64435	12.2502	1.83865	12.25	1.40385
12.2585	0.92975	12.2585	1.2305	12.2587	1.4835	12.2587	1.07085	12.2583	2.07265	12.2587	1.64605	12.2585	1.84025	12.2583	1.40755
12.2668	1.00775	12.2668	1.3023	12.267	1.4843	12.267	1.08315	12.2667	2.0702	12.267	1.64775	12.2668	1.8405	12.2667	1.41125
12.2752	1.08205	12.2752	1.36845	12.2753	1.4857	12.2753	1.0942	12.275	2.0715	12.2753	1.64755	12.2752	1.84115	12.275	1.41565
12.2835	1.1507	12.2835	1.43105	12.2837	1.48155	12.2837	1.103	12.2833	2.07065	12.2837	1.6455	12.2835	1.8386	12.2833	1.4183
12.2918	1.20775	12.2918	1.48485	12.292	1.4833	12.292	1.11315	12.2917	2.0712	12.292	1.6452	12.2918	1.8386	12.2917	1.4224
12.3002	1.2544	12.3002	1.53	12.3003	1.48155	12.3003	1.1232	12.3	2.07125	12.3003	1.66	12.3002	1.83615	12.3	1.4256
12.3085	1.2872	12.3085	1.55815	12.3087	1.4794	12.3087	1.1298	12.3083	2.0727	12.3087	1.6281	12.3085	1.8335	12.3083	1.42815
12.3168	1.3093	12.3168	1.57865	12.317	1.4766	12.317	1.13475	12.3167	2.0747	12.317	1.6297	12.3168	1.8283	12.3167	1.42965
12.3252	1.31485	12.3252	1.58555	12.3253	1.4726	12.3253	1.1418	12.325	2.0774	12.3253	1.66315	12.3252	1.8239	12.325	1.43235
12.3335	1.3093	12.3335	1.57945	12.3337	1.46455	12.3337	1.1459	12.3333	2.0764	12.3337	1.6448	12.3335	1.8162	12.3333	1.4344
12.3418	1.28895	12.3418	1.5597	12.342	1.45785	12.342	1.14985	12.3417	2.07785	12.342	1.62325	12.3418	1.808	12.3417	1.4371
12.3502	1.25695	12.3502	1.52985	12.3503	1.45065	12.3503	1.1515	12.35	2.07925	12.3503	1.61775	12.3502	1.7985	12.35	1.4407
12.3585	1.2127	12.3585	1.48775	12.3587	1.4438	12.3587	1.15135	12.3583	2.07895	12.3587	1.6097	12.3585	1.7893	12.3583	1.44
12.3668	1.1636	12.3668	1.43805	12.367	1.4316	12.367	1.15125	12.3667	2.0804	12.367	1.6098	12.3668	1.7786	12.3667	1.4423
12.3752	1.10655	12.3752	1.37985	12.3753	1.41995	12.3753	1.149	12.375	2.0794	12.3753	1.6011	12.3752	1.76365	12.375	1.4425
12.3835	1.041	12.3835	1.3172	12.3837	1.40735	12.3837	1.1475	12.3833	2.0789	12.3837	1.5734	12.3835	1.74685	12.3833	1.4432
12.3918	0.974	12.3918	1.2519	12.392	1.39405	12.392	1.14335	12.3917	2.07675	12.392	1.56	12.3918	1.7337	12.3917	1.44495
12.4002	0.9078	12.4002	1.1822	12.4003	1.3801	12.4003	1.13745	12.4	2.0742	12.4003	1.54785	12.4002	1.71765	12.4	1.4467
12.4085	0.8407	12.4085	1.11565	12.4087	1.3621	12.4087	1.12795	12.4083	2.0727	12.4087	1.53095	12.4085	1.69855	12.4083	1.4481
12.4168	0.77705	12.4168	1.04985	12.417	1.34365	12.417	1.11925	12.4167	2.0704	12.417	1.5157	12.4168	1.6786	12.4167	1.44695
12.4252	0.7156	12.4252	0.9871	12.4253	1.32595	12.4253	1.10915	12.425	2.0676	12.4253	1.497	12.4252	1.66105	12.425	1.4462
12.4335	0.6624	12.4335	0.92885	12.4337	1.30785	12.4337	1.0973	12.4333	2.06425	12.4337	1.48025	12.4335	1.6418	12.4333	1.4426
12.4418	0.60875	12.4418	0.87295	12.442	1.2878	12.442	1.0839	12.4417	2.0605	12.442	1.46015	12.4418	1.61905	12.4417	1.4382
12.4502	0.5596	12.4502	0.8239	12.4503	1.2684	12.4503	1.06885	12.45	2.0568	12.4503	1.4387	12.4502	1.6001	12.45	1.4368
12.4585	0.51545	12.4585	0.77565	12.4587	1.24555	12.4587	1.0545	12.4583	2.05495	12.4587	1.41875	12.4585	1.5788	12.4583	1.431
12.4668	0.4768	12.4668	0.73645	12.467	1.22535	12.467	1.03835	12.4667	2.05025	12.467	1.39735	12.4668	1.56005	12.4667	1.42725
12.4752	0.44425	12.4752	0.69745	12.4753	1.20655	12.4753	1.0204	12.475	2.0459	12.4753	1.37745	12.4752	1.5393	12.475	1.42285
12.4835	0.41645	12.4835	0.66855	12.4837	1.18635	12.4837	1.00245	12.4833	2.0424	12.4837	1.3588	12.4835	1.5215	12.4833	1.41455
12.4918	0.38995	12.4918	0.6383	12.492	1.1669	12.492	0.9834	12.4917	2.039	12.492	1.34005	12.4918	1.50415	12.4917	1.4041
12.5002	0.36855	12.5002	0.6144	12.5003	1.1474	12.5003	0.96365	12.5	2.03385	12.5003	1.3192	12.5002	1.48515	12.5	1.3968
12.5085	0.349	12.5085	0.59495	12.5087	1.1288	12.5087	0.944	12.5083	2.03105	12.5087	1.30095	12.5085	1.4691	12.5083	1.3865
12.5168	0.3329	12.5168	0.5784	12.517	1.1113	12.517	0.92735	12.5167	2.03015	12.517	1.28225	12.5168	1.45405	12.5167	1.37595
12.5252	0.3181	12.5252	0.56215	12.5253	1.096	12.5253	0.9085	12.525	2.0279	12.5253	1.26735	12.5252	1.43975	12.525	1.3648
12.5335	0.30865	12.5335	0.54975	12.5337	1.0765	12.5337	0.88865	12.5333	2.0227	12.5337	1.24775	12.5335	1.42445	12.5333	1.3524
12.5418	0.29885	12.5418	0.53965	12.542	1.06385	12.542	0.87115	12.5417	2.01955	12.542	1.2356	12.5418	1.4129	12.5417	1.34035
12.5502	0.29055	12.5502	0.53165	12.5503	1.0487	12.5503	0.85495	12.55	2.01375	12.5503	1.22165	12.5502	1.39975	12.55	1.32705
12.5585	0.2834	12.5585	0.52305	12.5587	1.0341	12.5587	0.83905	12.5583	2.01165	12.5587	1.2074	12.5585	1.3899	12.5583	1.3113
12.5668	0.27835	12.5668	0.5093	12.567	1.0224	12.567	0.82425	12.5667	2.0072	12.567	1.1959	12.5668	1.3778	12.5667	1.29505
12.5752	0.27505	12.5752	0.53065	12.5753	1.0122	12.5753	0.80775	12.575	2.0061	12.5753	1.18715	12.5752	1.373	12.575	1.2813
12.5835	0.2714	12.5835	0.5003	12.5837	1.0007	12.5837	0.79495	12.5833	2.00335	12.5837	1.1764	12.5835	1.3632	12.5833	1.2665
12.5918	0.26705	12.5918	0.5481	12.592	0.99055	12.592	0.7812	12.5917	2.00085	12.592	1.16755	12.5918	1.35555	12.5917	1.2514
12.6002	0.26435	12.6002	0.5338	12.6003	0.9826	12.6003	0.7689	12.6	1.99755	12.6003	1.1578	12.6002	1.3481	12.6	1.2349
12.6085	0.2658	12.6085	0.50585	12.6087	0.97465	12.6087	0.75865	12.6083	1.99645	12.6087	1.1536	12.6085	1.34445	12.6083	1.2209
12.6168	0.2632	12.6168	0.49875	12.617	0.9648	12.617	0.74695	12.6167	1.99635	12.617	1.14385	12.6168	1.3351	12.6167	1.2043
12.6252	0.26205	12.6252	0.49825	12.6253	0.96215	12.6253	0.74005	12.625	1.99525	12.6253	1.13955	12.6252	1.3324	12.625	1.1894
12.6335	0.2651	12.6335	0.49965	12.6337	0.9519	12.6337	0.7335	12.6333	1.99485	12.6337	1.13165	12.6335	1.32445	12.6333	1.17605
12.6418	0.268	12.6418	0.50385	12.642	0.9475	12.642	0.7278	12.6417	1.9968	12.642	1.128	12.6418	1.3209	12.6417	1.1627
12.6502	0.2691	12.6502	0.5036	12.6503	0.944	12.6503	0.71915	12.65	1.9993	12.6503	1.12505	12.6502	1.31895	12.65	1.1496
12.6585	0.2711	12.6585	0.5048	12.6587	1.0107	12.6587	0.71485	12.6583	2.0015	12.6587	1.19225	12.6585	1.38565	12.6583	1.13285
12.6668	0.27475	12.6668	0.5083	12.667	0.89255	12.667	0.7094	12.6667	2.0043	12.667	1.0749	12.6668	1.26945	12.6667	1.12335
12.6752	0.27575	12.6752	0.51045	12.6753	1.02275	12.6753	0.70335	12.675	2.00605	12.6753	1.2044	12.6752	1.3982	12.675	1.1124
12.6835	0.27955	12.6835	0.5138	12.6837	0.9277	12.6837	0.7007	12.6833	2.01105	12.6837	1.11035	12.6835	1.30345	12.6833	1.1
12.6918	0.28245	12.6918	0.5155	12.692	0.90675	12.692	0.69735	12.6917	2.01725	12.692	1.0904	12.6918	1.28485	12.6917	1.0904
12.7002	0.2822	12.7002	0.51405	12.7003	0.91675	12.7003	0.69445	12.7	2.0248	12.7003	1.09935	12.7002	1.2937	12.7	1.07935
12.7085	0.2828	12.7085	0.51755	12.7087	0.9216	12.7087	0.6926	12.7083	2.03065	12.7087	1.10255	12.7085	1.29885	12.7083	1.074
12.7168	0.28145	12.7168	0.51575	12.717	0.91435	12.717	0.68835	12.7167	2.03835	12.717	1.09585	12.7168	1.28975	12.7167	1.0625
12.7252	0.2807	12.7252	0.51475	12.7253	0.90925	12.7253	0.6881	12.725	2.04645	12.7253	1.09285	12.7252	1.2843	12.725	1.05465
12.7335	0.2801	12.7335	0.51505	12.7337	0.9123	12.7337	0.68715	12.7333	2.05115	12.7337	1.09495	12.7335	1.28705	12.7333	1.0471
12.7418	0.27915	12.7418	0.5124	12.742	0.90715	12.742	0.6865	12.7417	2.0593	12.742	1.0921	12.7418	1.28465	12.7417	1.0409
12.7502	0.2796	12.7502	0.5128	12.7503	0.906	12.7503	0.6867	12.75	2.06645	12.7503	1.08855	12.7502	1.2817	12.75	1.0335
12.7585	0.2748	12.7585	0.5103	12.7587	0.90525	12.7587	0.68575	12.7583	2.07595	12.7587	1.0875	12.7585	1.28075	12.7583	1.028
12.7668	0.2704	12.7668	0.5077	12.767	0.90335	12.767	0.68555	12.7667	2.08375	12.767	1.08645	12.7668	1.27905	12.7667	1.02455
12.7752	0.26805	12.7752	0.5053	12.7753	0.9027	12.7753	0.68575	12.775	2.09255	12.7753	1.08515	12.7752	1.2791	12.775	1.01815
12.7835	0.2665	12.7835	0.50255	12.7837	0.902	12.7837	0.686	12.7833	2.1001	12.7837	1.08515	12.7835	1.2804	12.7833	1.0171
12.7918	0.26475	12.7918	0.50215	12.792	0.9015	12.792	0.68795	12.7917	2.1089	12.792	1.0843	12.7918	1.2764	12.7917	1.01025
12.8002	0.2633	12.8002	0.5031	12.8003	0.90195	12.8003	0.68835	12.8	2.11675	12.8003	1.0846	12.8002	1.2795	12.8	1.0113
12.8085	0.2607	12.8085	0.5011	12.8087	0.9023	12.8087	0.68815	12.8083	2.12445	12.8087	1.0832	12.8085	1.27825	12.8083	1.00605
12.8168	0.2589	12.8168	0.5012	12.817	0.90535	12.817	0.68905	12.8167	2.13295	12.817	1.08435	12.8168	1.27895	12.8167	1.00545
12.8252	0.25785	12.8252	0.5017	12.8253	0.9046	12.8253	0.69155	12.825	2.1401	12.8253	1.0853	12.8252	1.27945	12.825	1.00455
12.8335	0.2571	12.8335	0.5004	12.8337	0.9065	12.8337	0.69125	12.8333	2.14695	12.8337	1.0842	12.8335	1.28085	12.8333	1.00475
12.8418	0.25585	12.8418	0.5005	12.842	0.90845	12.842	0.69095	12.8417	2.15325	12.842	1.0844	12.8418	1.2844	12.8417	1.00165
12.8502	0.2555	12.8502	0.50245	12.8503	0.91015	12.8503	0.69135	12.85	2.1582	12.8503	1.08635	12.8502	1.2864	12.85	1.00465
12.8585	0.25625	12.8585	0.50295	12.8587	0.9106	12.8587	0.69055	12.8583	2.1657	12.8587	1.0874	12.8585	1.28835	12.8583	1.00545
12.8668	0.25465	12.8668	0.5049	12.867	0.91265	12.867	0.692	12.8667	2.1703	12.867	1.08765	12.8668	1.2922	12.8667	1.00415
12.8752	0.255	12.8752	0.50275	12.8753	0.91705	12.8753	0.6932	12.875	2.1774	12.8753	1.0915	12.8752	1.29615	12.875	1.00795
12.8835	0.25085	12.8835	0.49955	12.8837	0.91815	12.8837	0.6924	12.8833	2.18065	12.8837	1.0899	12.8835	1.2969	12.8833	1.01155
12.8918	0.2506	12.8918	0.5009	12.892	0.9226	12.892	0.6955	12.8917	2.1863	12.892	1.09415	12.8918	1.3033	12.8917	1.01335
12.9002	0.25045	12.9002	0.49935	12.9003	0.9245	12.9003	0.69535	12.9	2.19175	12.9003	1.096	12.9002	1.30735	12.9	1.0165
12.9085	0.2487	12.9085	0.49805	12.9087	0.9283	12.9087	0.69395	12.9083	2.19585	12.9087	1.0973	12.9085	1.3111	12.9083	1.0188
12.9168	0.24595	12.9168	0.4958	12.917	0.9309	12.917	0.69445	12.9167	2.19535	12.917	1.09835	12.9168	1.31425	12.9167	1.02315
12.9252	0.245	12.9252	0.4915	12.9253	0.93495	12.9253	0.69265	12.925	2.1991	12.9253	1.1015	12.9252	1.3205	12.925	1.0276
12.9335	0.24355	12.9335	0.4894	12.9337	0.93755	12.9337	0.69275	12.9333	2.203	12.9337	1.10415	12.9335	1.3268	12.9333	1.03015
12.9418	0.24175	12.9418	0.4839	12.942	0.9445	12.942	0.69355	12.9417	2.2016	12.942	1.1081	12.9418	1.3309	12.9417	1.0397
12.9502	0.2406	12.9502	0.48255	12.9503	0.94565	12.9503	0.6941	12.95	2.2032	12.9503	1.10875	12.9502	1.33685	12.95	1.0403
12.9585	0.2405	12.9585	0.48095	12.9587	0.9502	12.9587	0.69295	12.9583	2.2042	12.9587	1.11185	12.9585	1.3433	12.9583	1.04995
12.9668	0.2355	12.9668	0.47505	12.967	0.9539	12.967	0.69245	12.9667	2.20255	12.967	1.11605	12.9668	1.35215	12.9667	1.05725
12.9752	0.23305	12.9752	0.4698	12.9753	0.9568	12.9753	0.69345	12.975	2.2041	12.9753	1.118	12.9752	1.3539	12.975	1.06515
12.9835	0.23275	12.9835	0.46675	12.9837	0.95855	12.9837	0.6942	12.9833	2.2032	12.9837	1.1197	12.9835	1.3461	12.9833	1.0713
12.9918	0.23175	12.9918	0.4651	12.992	0.9641	12.992	0.6919	12.9917	2.2037	12.992	1.1223	12.9918	1.31095	12.9917	1.0796
13.0002	0.229	13.0002	0.46095	13.0003	0.9658	13.0003	0.69225	13	2.20165	13.0003	1.1247	13.0002	1.4473	13	1.0893
13.0085	0.2281	13.0085	0.46015	13.0087	0.97165	13.0087	0.6936	13.0083	2.19915	13.0087	1.12725	13.0085	1.4538	13.0083	1.07315
13.0168	0.2272	13.0168	0.4551	13.017	0.9713	13.017	0.6904	13.0167	2.19865	13.017	1.12825	13.0168	1.38685	13.0167	0.99955
13.0252	0.22585	13.0252	0.45425	13.0253	0.97305	13.0253	0.6912	13.025	2.19575	13.0253	1.1286	13.0252	1.32145	13.025	1.1079
13.0335	0.2239	13.0335	0.45235	13.0337	0.976	13.0337	0.6915	13.0333	2.1893	13.0337	1.13105	13.0335	1.40245	13.0333	1.12205
13.0418	0.22245	13.0418	0.44805	13.042	0.976	13.042	0.68585	13.0417	2.1874	13.042	1.13215	13.0418	1.36515	13.0417	1.14015
13.0502	0.2238	13.0502	0.45075	13.0503	0.98005	13.0503	0.687	13.05	2.18125	13.0503	1.1342	13.0502	1.43285	13.05	1.1407
13.0585	0.22575	13.0585	0.44975	13.0587	0.97665	13.0587	0.68555	13.0583	2.17675	13.0587	1.13295	13.0585	1.3642	13.0583	1.1467
13.0668	0.22205	13.0668	0.44945	13.067	0.97875	13.067	0.68145	13.0667	2.1698	13.067	1.13235	13.0668	1.37105	13.0667	1.1551
13.0752	0.2233	13.0752	0.44965	13.0753	0.97685	13.0753	0.67885	13.075	2.16375	13.0753	1.1313	13.0752	1.37645	13.075	1.1628
13.0835	0.22205	13.0835	0.45305	13.0837	0.97735	13.0837	0.6779	13.0833	2.1547	13.0837	1.1313	13.0835	1.3771	13.0833	1.1716
13.0918	0.2232	13.0918	0.4515	13.092	0.97345	13.092	0.6741	13.0917	2.14695	13.092	1.1278	13.0918	1.3743	13.0917	1.1799
13.1002	0.22545	13.1002	0.4546	13.1003	0.9724	13.1003	0.67015	13.1	2.1365	13.1003	1.1273	13.1002	1.37135	13.1	1.18485
13.1085	0.2255	13.1085	0.4579	13.1087	0.9699	13.1087	0.66825	13.1083	2.1251	13.1087	1.1247	13.1085	1.3665	13.1083	1.18995
13.1168	0.22525	13.1168	0.45625	13.117	0.9639	13.117	0.6653	13.1167	2.1139	13.117	1.1219	13.1168	1.35885	13.1167	1.19255
13.1252	0.22735	13.1252	0.4586	13.1253	0.9607	13.1253	0.6604	13.125	2.1011	13.1253	1.11975	13.1252	1.3543	13.125	1.19675
13.1335	0.22485	13.1335	0.4594	13.1337	0.9561	13.1337	0.65785	13.1333	2.08835	13.1337	1.11375	13.1335	1.3465	13.1333	1.20085
13.1418	0.2261	13.1418	0.4637	13.142	0.9475	13.142	0.65325	13.1417	2.07665	13.142	1.1079	13.1418	1.3362	13.1417	1.1979
13.1502	0.22925	13.1502	0.4664	13.1503	0.9436	13.1503	0.64895	13.15	2.06495	13.1503	1.10395	13.1502	1.3327	13.15	1.1996
13.1585	0.22755	13.1585	0.4656	13.1587	0.93665	13.1587	0.64575	13.1583	2.0508	13.1587	1.0979	13.1585	1.3176	13.1583	1.1971
13.1668	0.2283	13.1668	0.4673	13.167	0.92855	13.167	0.64085	13.1667	2.03805	13.167	1.09205	13.1668	1.30885	13.1667	1.19415
13.1752	0.23055	13.1752	0.46795	13.1753	0.9197	13.1753	0.6374	13.175	2.02665	13.1753	1.0851	13.1752	1.2988	13.175	1.18555
13.1835	0.2308	13.1835	0.4699	13.1837	0.91	13.1837	0.63365	13.1833	2.01305	13.1837	1.0784	13.1835	1.2874	13.1833	1.1809
13.1918	0.22865	13.1918	0.46865	13.192	0.90075	13.192	0.62875	13.1917	2.00345	13.192	1.07125	13.1918	1.27685	13.1917	1.1751
13.2002	0.2317	13.2002	0.47065	13.2003	0.89235	13.2003	0.6265	13.2	1.9944	13.2003	1.06425	13.2002	1.26595	13.2	1.16525
13.2085	0.23065	13.2085	0.4675	13.2087	0.8831	13.2087	0.6218	13.2083	1.98585	13.2087	1.0558	13.2085	1.25125	13.2083	1.1584
13.2168	0.2295	13.2168	0.4652	13.217	0.876	13.217	0.6172	13.2167	1.98135	13.217	1.0501	13.2168	1.2462	13.2167	1.15
13.2252	0.22965	13.2252	0.46465	13.2253	0.86555	13.2253	0.6131	13.225	1.97395	13.2253	1.0403	13.2252	1.2343	13.225	1.1367
13.2335	0.22975	13.2335	0.46165	13.2337	0.85855	13.2337	0.609	13.2333	1.9693	13.2337	1.0334	13.2335	1.22415	13.2333	1.12565
13.2418	0.22805	13.2418	0.45965	13.242	0.85115	13.242	0.60375	13.2417	1.9672	13.242	1.0263	13.2418	1.2178	13.2417	1.1108
13.2502	0.2263	13.2502	0.4565	13.2503	0.84245	13.2503	0.60135	13.25	1.9635	13.2503	1.02055	13.2502	1.2066	13.25	1.1
13.2585	0.2243	13.2585	0.45235	13.2587	0.8331	13.2587	0.59745	13.2583	1.96335	13.2587	1.01265	13.2585	1.19855	13.2583	1.08605
13.2668	0.2263	13.2668	0.45195	13.267	0.8254	13.267	0.5929	13.2667	1.96235	13.267	1.0061	13.2668	1.1941	13.2667	1.07155
13.2752	0.22355	13.2752	0.4484	13.2753	0.8181	13.2753	0.5923	13.275	1.96515	13.2753	0.99995	13.2752	1.1862	13.275	1.061
13.2835	0.22335	13.2835	0.4471	13.2837	0.8103	13.2837	0.5887	13.2833	1.9657	13.2837	0.99405	13.2835	1.1745	13.2833	1.04655
13.2918	0.2226	13.2918	0.4445	13.292	0.80735	13.292	0.5884	13.2917	1.97055	13.292	0.9936	13.2918	1.1708	13.2917	1.03135
13.3002	0.2212	13.3002	0.4409	13.3003	0.79925	13.3003	0.58395	13.3	1.971	13.3003	0.98485	13.3002	1.16375	13.3	1.01905
13.3085	0.2209	13.3085	0.43885	13.3087	0.7929	13.3087	0.58225	13.3083	1.97575	13.3087	0.98015	13.3085	1.15855	13.3083	1.0083
13.3168	0.2205	13.3168	0.43775	13.317	0.7863	13.317	0.5819	13.3167	1.98005	13.317	0.97505	13.3168	1.15055	13.3167	0.9932
13.3252	0.2183	13.3252	0.43095	13.3253	0.78355	13.3253	0.5772	13.325	1.98525	13.3253	0.97155	13.3252	1.14845	13.325	0.98
13.3335	0.2168	13.3335	0.4295	13.3337	0.77435	13.3337	0.57695	13.3333	1.99075	13.3337	0.9662	13.3335	1.14065	13.3333	0.9696
13.3418	0.21585	13.3418	0.4249	13.342	0.77235	13.342	0.57305	13.3417	1.99575	13.342	0.9639	13.3418	1.13985	13.3417	0.95855
13.3502	0.2125	13.3502	0.423	13.3503	0.7676	13.3503	0.57395	13.35	1.99915	13.3503	0.95965	13.3502	1.132	13.35	0.94755
13.3585	0.2123	13.3585	0.4228	13.3587	0.7633	13.3587	0.57085	13.3583	2.00505	13.3587	0.95685	13.3585	1.12925	13.3583	0.9392
13.3668	0.213	13.3668	0.42075	13.367	0.7586	13.367	0.56785	13.3667	2.0106	13.367	0.95285	13.3668	1.1257	13.3667	0.9324
13.3752	0.21045	13.3752	0.417	13.3753	0.75655	13.3753	0.5662	13.375	2.01885	13.3753	0.94995	13.3752	1.12205	13.375	0.9228
13.3835	0.20765	13.3835	0.41355	13.3837	0.7529	13.3837	0.56675	13.3833	2.0233	13.3837	0.94765	13.3835	1.1175	13.3833	0.9118
13.3918	0.207	13.3918	0.41255	13.392	0.7512	13.392	0.5647	13.3917	2.0325	13.392	0.9453	13.3918	1.1174	13.3917	0.9056
13.4002	0.20595	13.4002	0.41155	13.4003	0.7463	13.4003	0.5651	13.4	2.04075	13.4003	0.9402	13.4002	1.11205	13.4	0.8982
13.4085	0.20765	13.4085	0.41	13.4087	0.74455	13.4087	0.56445	13.4083	2.0463	13.4087	0.93925	13.4085	1.11065	13.4083	0.892
13.4168	0.2067	13.4168	0.40945	13.417	0.741	13.417	0.5614	13.4167	2.0548	13.417	0.9355	13.4168	1.10595	13.4167	0.88735
13.4252	0.20405	13.4252	0.4069	13.4253	0.73785	13.4253	0.56115	13.425	2.0636	13.4253	0.93475	13.4252	1.10495	13.425	0.8787
13.4335	0.20525	13.4335	0.40645	13.4337	0.73805	13.4337	0.55935	13.4333	2.07565	13.4337	0.93385	13.4335	1.10565	13.4333	0.8747
13.4418	0.20245	13.4418	0.4035	13.442	0.73415	13.442	0.55625	13.4417	2.0893	13.442	0.92915	13.4418	1.1009	13.4417	0.87125
13.4502	0.1994	13.4502	0.4015	13.4503	0.733	13.4503	0.55695	13.45	2.0982	13.4503	0.92865	13.4502	1.1012	13.45	0.86605
13.4585	0.1999	13.4585	0.40235	13.4587	0.73195	13.4587	0.555	13.4583	2.1132	13.4587	0.92705	13.4585	1.0975	13.4583	0.8609
13.4668	0.2001	13.4668	0.40165	13.467	0.7284	13.467	0.55455	13.4667	2.12595	13.467	0.9237	13.4668	1.0973	13.4667	0.85755
13.4752	0.20115	13.4752	0.40095	13.4753	0.7278	13.4753	0.55385	13.475	2.1383	13.4753	0.9228	13.4752	1.0953	13.475	0.8542
13.4835	0.1988	13.4835	0.3998	13.4837	0.72675	13.4837	0.55215	13.4833	2.15105	13.4837	0.9232	13.4835	1.09595	13.4833	0.85
13.4918	0.1998	13.4918	0.39915	13.492	0.7256	13.492	0.54815	13.4917	2.16585	13.492	0.92345	13.4918	1.09545	13.4917	0.8471
13.5002	0.19975	13.5002	0.39695	13.5003	0.72355	13.5003	0.54885	13.5	2.18065	13.5003	0.9208	13.5002	1.09115	13.5	0.8437
13.5085	0.201	13.5085	0.3975	13.5087	0.72555	13.5087	0.5479	13.5083	2.19485	13.5087	0.921	13.5085	1.0936	13.5083	0.8417
13.5168	0.1995	13.5168	0.3985	13.517	0.745	13.517	0.54875	13.5167	2.21035	13.517	0.9408	13.5168	1.1124	13.5167	0.8383
13.5252	0.1966	13.5252	0.3964	13.5253	0.74365	13.5253	0.54695	13.525	2.2264	13.5253	0.93955	13.5252	1.1147	13.525	0.8365
13.5335	0.1975	13.5335	0.39475	13.5337	0.69495	13.5337	0.54335	13.5333	2.24045	13.5337	0.8896	13.5335	1.0617	13.5333	0.835
13.5418	0.1985	13.5418	0.3968	13.542	0.73155	13.542	0.5415	13.5417	2.25585	13.542	0.9256	13.5418	1.09915	13.5417	0.83155
13.5502	0.1992	13.5502	0.39825	13.5503	0.7405	13.5503	0.5415	13.55	2.27275	13.5503	0.9362	13.5502	1.10895	13.55	0.82925
13.5585	0.19805	13.5585	0.3951	13.5587	0.73145	13.5587	0.5403	13.5583	2.28635	13.5587	0.9272	13.5585	1.10005	13.5583	0.8266
13.5668	0.19785	13.5668	0.396	13.567	0.721	13.567	0.53835	13.5667	2.30125	13.567	0.91415	13.5668	1.0886	13.5667	0.8265
13.5752	0.1998	13.5752	0.3982	13.5753	0.71625	13.5753	0.5398	13.575	2.31585	13.5753	0.9083	13.5752	1.08235	13.575	0.82215
13.5835	0.2011	13.5835	0.3993	13.5837	0.71545	13.5837	0.5387	13.5833	2.32915	13.5837	0.90575	13.5835	1.0812	13.5833	0.8213
13.5918	0.20085	13.5918	0.3983	13.592	0.71705	13.592	0.5404	13.5917	2.34265	13.592	0.9051	13.5918	1.0841	13.5917	0.81915
13.6002	0.20105	13.6002	0.40045	13.6003	0.7167	13.6003	0.53765	13.6	2.3533	13.6003	0.9069	13.6002	1.08335	13.6	0.8167
13.6085	0.207	13.6085	0.40095	13.6087	0.7202	13.6087	0.53535	13.6083	2.36575	13.6087	0.9077	13.6085	1.08445	13.6083	0.81595
13.6168	0.2149	13.6168	0.40125	13.617	0.7223	13.617	0.5358	13.6167	2.37565	13.617	0.90745	13.6168	1.08685	13.6167	0.81305
13.6252	0.19935	13.6252	0.4011	13.6253	0.72295	13.6253	0.536	13.625	2.3863	13.6253	0.90685	13.6252	1.08695	13.625	0.81175
13.6335	0.20195	13.6335	0.40345	13.6337	0.72305	13.6337	0.53385	13.6333	2.39515	13.6337	0.90615	13.6335	1.0868	13.6333	0.8082
13.6418	0.20665	13.6418	0.4057	13.642	0.7283	13.642	0.53175	13.6417	2.40455	13.642	0.90995	13.6418	1.09285	13.6417	0.80655
13.6502	0.2081	13.6502	0.4071	13.6503	0.7313	13.6503	0.53055	13.65	2.4124	13.6503	0.9111	13.6502	1.09555	13.65	0.80765
13.6585	0.20935	13.6585	0.4076	13.6587	0.7332	13.6587	0.53075	13.6583	2.4188	13.6587	0.9128	13.6585	1.0986	13.6583	0.8046
13.6668	0.2115	13.6668	0.4098	13.667	0.7388	13.667	0.5314	13.6667	2.4231	13.667	0.91775	13.6668	1.10095	13.6667	0.80695
13.6752	0.21435	13.6752	0.4119	13.6753	0.74185	13.6753	0.52935	13.675	2.4249	13.6753	0.92025	13.6752	1.1052	13.675	0.80345
13.6835	0.2168	13.6835	0.4129	13.6837	0.7478	13.6837	0.52995	13.6833	2.4271	13.6837	0.9255	13.6835	1.11265	13.6833	0.8008
13.6918	0.2186	13.6918	0.4146	13.692	0.75185	13.692	0.5289	13.6917	2.42955	13.692	0.92625	13.6918	1.1148	13.6917	0.80225
13.7002	0.2203	13.7002	0.4172	13.7003	0.75875	13.7003	0.5288	13.7	2.4284	13.7003	0.9337	13.7002	1.12315	13.7	0.80055
13.7085	0.22305	13.7085	0.41945	13.7087	0.76255	13.7087	0.5272	13.7083	2.42885	13.7087	0.9387	13.7085	1.128	13.7083	0.8037
13.7168	0.22305	13.7168	0.41985	13.717	0.7693	13.717	0.52775	13.7167	2.4288	13.717	0.94395	13.7168	1.13325	13.7167	0.80155
13.7252	0.2268	13.7252	0.42135	13.7253	0.77555	13.7253	0.5268	13.725	2.4257	13.7253	0.95155	13.7252	1.1416	13.725	0.8051
13.7335	0.2273	13.7335	0.423	13.7337	0.7817	13.7337	0.5259	13.7333	2.42405	13.7337	0.9573	13.7335	1.1499	13.7333	0.80885
13.7418	0.22625	13.7418	0.42115	13.742	0.7878	13.742	0.52745	13.7417	2.4201	13.742	0.9643	13.7418	1.15485	13.7417	0.80765
13.7502	0.2268	13.7502	0.4232	13.7503	0.79125	13.7503	0.5279	13.75	2.41815	13.7503	0.9696	13.7502	1.1612	13.75	0.81115
13.7585	0.2306	13.7585	0.42675	13.7587	0.79795	13.7587	0.52675	13.7583	2.4134	13.7587	0.97855	13.7585	1.17035	13.7583	0.81385
13.7668	0.23015	13.7668	0.425	13.767	0.80465	13.767	0.5287	13.7667	2.40975	13.767	0.9844	13.7668	1.1747	13.7667	0.81515
13.7752	0.23215	13.7752	0.42665	13.7753	0.80945	13.7753	0.5292	13.775	2.40565	13.7753	0.99155	13.7752	1.18265	13.775	0.82135
13.7835	0.2327	13.7835	0.427	13.7837	0.81725	13.7837	0.52865	13.7833	2.40115	13.7837	1.00035	13.7835	1.192	13.7833	0.82585
13.7918	0.2344	13.7918	0.42705	13.792	0.81955	13.792	0.5275	13.7917	2.3952	13.792	1.0063	13.7918	1.1955	13.7917	0.8333
13.8002	0.2318	13.8002	0.428	13.8003	0.82495	13.8003	0.52985	13.8	2.3883	13.8003	1.0133	13.8002	1.20445	13.8	0.84005
13.8085	0.23385	13.8085	0.42835	13.8087	0.8294	13.8087	0.528	13.8083	2.3805	13.8087	1.02245	13.8085	1.2092	13.8083	0.84515
13.8168	0.2324	13.8168	0.42655	13.817	0.8331	13.817	0.5296	13.8167	2.37125	13.817	1.02805	13.8168	1.21675	13.8167	0.8532
13.8252	0.2332	13.8252	0.42835	13.8253	0.8358	13.8253	0.5281	13.825	2.36405	13.8253	1.0349	13.8252	1.21945	13.825	0.86175
13.8335	0.2303	13.8335	0.42725	13.8337	0.83635	13.8337	0.531	13.8333	2.35215	13.8337	1.03875	13.8335	1.2237	13.8333	0.872
13.8418	0.23065	13.8418	0.4276	13.842	0.8384	13.842	0.5295	13.8417	2.34015	13.842	1.0437	13.8418	1.2264	13.8417	0.8817
13.8502	0.23025	13.8502	0.42505	13.8503	0.8376	13.8503	0.53135	13.85	2.32675	13.8503	1.04495	13.8502	1.22665	13.85	0.8907
13.8585	0.2279	13.8585	0.4241	13.8587	0.84005	13.8587	0.53255	13.8583	2.31085	13.8587	1.0512	13.8585	1.2299	13.8583	0.89905
13.8668	0.22625	13.8668	0.4243	13.867	0.83675	13.867	0.5353	13.8667	2.2926	13.867	1.0529	13.8668	1.2314	13.8667	0.9115
13.8752	0.22645	13.8752	0.42255	13.8753	0.837	13.8753	0.53655	13.875	2.2733	13.8753	1.05425	13.8752	1.22925	13.875	0.92105
13.8835	0.22235	13.8835	0.42205	13.8837	0.836	13.8837	0.54025	13.8833	2.2566	13.8837	1.0571	13.8835	1.22955	13.8833	0.92935
13.8918	0.22385	13.8918	0.42145	13.892	0.8301	13.892	0.54205	13.8917	2.23745	13.892	1.0551	13.8918	1.2248	13.8917	0.93795
13.9002	0.22285	13.9002	0.4211	13.9003	0.8258	13.9003	0.5413	13.9	2.21645	13.9003	1.0532	13.9002	1.22205	13.9	0.94935
13.9085	0.22125	13.9085	0.41925	13.9087	0.8252	13.9087	0.54855	13.9083	2.19525	13.9087	1.0547	13.9085	1.22015	13.9083	0.95735
13.9168	0.21895	13.9168	0.41665	13.917	0.8189	13.917	0.55025	13.9167	2.1743	13.917	1.05055	13.9168	1.2157	13.9167	0.96545
13.9252	0.2189	13.9252	0.41635	13.9253	0.81505	13.9253	0.5523	13.925	2.15405	13.9253	1.04865	13.9252	1.2117	13.925	0.97085
13.9335	0.2164	13.9335	0.4153	13.9337	0.8081	13.9337	0.5555	13.9333	2.13485	13.9337	1.04275	13.9335	1.2057	13.9333	0.9804
13.9418	0.2153	13.9418	0.4133	13.942	0.80345	13.942	0.558	13.9417	2.11325	13.942	1.0405	13.9418	1.19915	13.9417	0.9845
13.9502	0.2191	13.9502	0.4146	13.9503	0.7967	13.9503	0.56175	13.95	2.0969	13.9503	1.03435	13.9502	1.1927	13.95	0.99275
13.9585	0.2118	13.9585	0.4101	13.9587	0.7915	13.9587	0.56525	13.9583	2.07985	13.9587	1.02965	13.9585	1.1923	13.9583	0.99505
13.9668	0.213	13.9668	0.40795	13.967	0.7835	13.967	0.5683	13.9667	2.062	13.967	1.01735	13.9668	1.1745	13.9667	0.9973
13.9752	0.21015	13.9752	0.4046	13.9753	0.77975	13.9753	0.56915	13.975	2.04395	13.9753	1.011	13.9752	1.17135	13.975	0.9981
13.9835	0.2096	13.9835	0.40415	13.9837	0.7688	13.9837	0.5722	13.9833	2.0298	13.9837	1.0164	13.9835	1.16305	13.9833	0.9994
13.9918	0.20995	13.9918	0.40495	13.992	0.7665	13.992	0.57495	13.9917	2.0132	13.992	0.989	13.9918	1.15775	13.9917	0.9972
14.0002	0.21	14.0002	0.4048	14.0003	0.7583	14.0003	0.57495	14	1.9973	14.0003	0.9644	14.0002	1.1478	14	0.9956
14.0085	0.20765	14.0085	0.4027	14.0087	0.75385	14.0087	0.5783	14.0083	1.9839	14.0087	0.9949	14.0085	1.14435	14.0083	0.9921
14.0168	0.20605	14.0168	0.40205	14.017	0.74795	14.017	0.57885	14.0167	1.9717	14.017	0.97655	14.0168	1.1344	14.0167	0.9886
14.0252	0.2084	14.0252	0.4049	14.0253	0.7452	14.0253	0.57985	14.025	1.96115	14.0253	0.9613	14.0252	1.1316	14.025	0.9843
14.0335	0.2074	14.0335	0.40365	14.0337	0.7385	14.0337	0.58145	14.0333	1.9483	14.0337	0.9694	14.0335	1.12355	14.0333	0.97865
14.0418	0.2074	14.0418	0.4037	14.042	0.7341	14.042	0.5833	14.0417	1.93605	14.042	0.9615	14.0418	1.1179	14.0417	0.97065
14.0502	0.2088	14.0502	0.40655	14.0503	0.73175	14.0503	0.5831	14.05	1.925	14.0503	0.95755	14.0502	1.1133	14.05	0.965
14.0585	0.20595	14.0585	0.4049	14.0587	0.72435	14.0587	0.58295	14.0583	1.91455	14.0587	0.9489	14.0585	1.1076	14.0583	0.95655
14.0668	0.20405	14.0668	0.4053	14.067	0.72205	14.067	0.58135	14.0667	1.90485	14.067	0.9446	14.0668	1.1015	14.0667	0.9526
14.0752	0.20235	14.0752	0.4072	14.0753	0.71895	14.0753	0.5821	14.075	1.8966	14.0753	0.93965	14.0752	1.0984	14.075	0.94285
14.0835	0.20125	14.0835	0.40965	14.0837	0.71725	14.0837	0.5824	14.0833	1.8879	14.0837	0.9379	14.0835	1.0964	14.0833	0.93765
14.0918	0.20215	14.0918	0.41265	14.092	0.71185	14.092	0.5778	14.0917	1.88035	14.092	0.9323	14.0918	1.0914	14.0917	0.92985
14.1002	0.2013	14.1002	0.4156	14.1003	0.71095	14.1003	0.57835	14.1	1.87015	14.1003	0.92925	14.1002	1.0885	14.1	0.9207
14.1085	0.2007	14.1085	0.4201	14.1087	0.7066	14.1087	0.57625	14.1083	1.86515	14.1087	0.9251	14.1085	1.08475	14.1083	0.91295
14.1168	0.2	14.1168	0.4264	14.117	0.7063	14.117	0.57555	14.1167	1.8574	14.117	0.9226	14.1168	1.0834	14.1167	0.9052
14.1252	0.19965	14.1252	0.4331	14.1253	0.7051	14.1253	0.57085	14.125	1.85105	14.1253	0.92005	14.1252	1.08135	14.125	0.89915
14.1335	0.20015	14.1335	0.4429	14.1337	0.70145	14.1337	0.57185	14.1333	1.84625	14.1337	0.9179	14.1335	1.0785	14.1333	0.8931
14.1418	0.20065	14.1418	0.4533	14.142	0.7004	14.142	0.5656	14.1417	1.8411	14.142	0.9159	14.1418	1.0779	14.1417	0.8864
14.1502	0.2003	14.1502	0.4649	14.1503	0.70255	14.1503	0.56795	14.15	1.8356	14.1503	0.91545	14.1502	1.0797	14.15	0.88195
14.1585	0.20065	14.1585	0.47945	14.1587	0.70025	14.1587	0.56265	14.1583	1.83085	14.1587	0.9129	14.1585	1.077	14.1583	0.87535
14.1668	0.1998	14.1668	0.49215	14.167	0.7016	14.167	0.55815	14.1667	1.8268	14.167	0.91415	14.1668	1.078	14.1667	0.8689
14.1752	0.20065	14.1752	0.51055	14.1753	0.70225	14.1753	0.5587	14.175	1.821	14.1753	0.9138	14.1752	1.078	14.175	0.86885
14.1835	0.2005	14.1835	0.52685	14.1837	0.7	14.1837	0.55585	14.1833	1.8176	14.1837	0.91325	14.1835	1.07875	14.1833	0.866
14.1918	0.2006	14.1918	0.5453	14.192	0.70085	14.192	0.5555	14.1917	1.81585	14.192	0.91305	14.1918	1.07835	14.1917	0.8616
14.2002	0.1978	14.2002	0.5646	14.2003	0.70355	14.2003	0.55205	14.2	1.8107	14.2003	0.91595	14.2002	1.0812	14.2	0.8573
14.2085	0.1982	14.2085	0.5851	14.2087	0.704	14.2087	0.55025	14.2083	1.8093	14.2087	0.91455	14.2085	1.082	14.2083	0.85495
14.2168	0.19735	14.2168	0.6042	14.217	0.7035	14.217	0.5496	14.2167	1.8065	14.217	0.91525	14.2168	1.0837	14.2167	0.8526
14.2252	0.19875	14.2252	0.6298	14.2253	0.7048	14.2253	0.551	14.225	1.80485	14.2253	0.9184	14.2252	1.0844	14.225	0.8509
14.2335	0.19585	14.2335	0.6478	14.2337	0.70735	14.2337	0.547	14.2333	1.79935	14.2337	0.9203	14.2335	1.0882	14.2333	0.8497
14.2418	0.1971	14.2418	0.6694	14.242	0.70885	14.242	0.546	14.2417	1.7947	14.242	0.9199	14.2418	1.09085	14.2417	0.84935
14.2502	0.19675	14.2502	0.687	14.2503	0.71545	14.2503	0.54525	14.25	1.7938	14.2503	0.92725	14.2502	1.0992	14.25	0.8496
14.2585	0.1966	14.2585	0.70725	14.2587	0.71815	14.2587	0.5446	14.2583	1.79065	14.2587	0.9288	14.2585	1.10365	14.2583	0.84705
14.2668	0.19505	14.2668	0.723	14.267	0.72385	14.267	0.5454	14.2667	1.787	14.267	0.9354	14.2668	1.11355	14.2667	0.8454
14.2752	0.19665	14.2752	0.73665	14.2753	0.7122	14.2753	0.5441	14.275	1.7858	14.2753	0.9242	14.2752	1.1022	14.275	0.8455
14.2835	0.19615	14.2835	0.74875	14.2837	0.77735	14.2837	0.5419	14.2833	1.78205	14.2837	0.989	14.2835	1.169	14.2833	0.84625
14.2918	0.18975	14.2918	0.7556	14.292	0.7628	14.292	0.5437	14.2917	1.77735	14.292	0.97255	14.2918	1.15725	14.2917	0.84455
14.3002	0.1909	14.3002	0.76435	14.3003	0.7418	14.3003	0.5452	14.3	1.77415	14.3003	0.95	14.3002	1.1381	14.3	0.84695
14.3085	0.19225	14.3085	0.76705	14.3087	0.78695	14.3087	0.5436	14.3083	1.77245	14.3087	0.9928	14.3085	1.1867	14.3083	0.84695
14.3168	0.19245	14.3168	0.7653	14.317	0.79615	14.317	0.5454	14.3167	1.7707	14.317	1.00265	14.3168	1.19795	14.3167	0.84575
14.3252	0.1895	14.3252	0.76425	14.3253	0.80285	14.3253	0.5462	14.325	1.76725	14.3253	1.00685	14.3252	1.2087	14.325	0.848
14.3335	0.1903	14.3335	0.76165	14.3337	0.81635	14.3337	0.5498	14.3333	1.766	14.3337	1.02045	14.3335	1.2264	14.3333	0.84925
14.3418	0.1895	14.3418	0.7514	14.342	0.8363	14.342	0.55315	14.3417	1.765	14.342	1.0376	14.3418	1.2513	14.3417	0.84735
14.3502	0.19005	14.3502	0.7401	14.3503	0.85995	14.3503	0.5558	14.35	1.76305	14.3503	1.06215	14.3502	1.2787	14.35	0.8502
14.3585	0.18845	14.3585	0.72725	14.3587	0.88925	14.3587	0.5584	14.3583	1.75975	14.3587	1.08785	14.3585	1.3106	14.3583	0.85235
14.3668	0.18925	14.3668	0.71235	14.367	0.91855	14.367	0.56625	14.3667	1.75955	14.367	1.1168	14.3668	1.3474	14.3667	0.8537
14.3752	0.1902	14.3752	0.6955	14.3753	0.95335	14.3753	0.57355	14.375	1.75805	14.3753	1.149	14.3752	1.38565	14.375	0.85995
14.3835	0.19005	14.3835	0.67515	14.3837	0.98575	14.3837	0.58225	14.3833	1.75795	14.3837	1.1807	14.3835	1.4221	14.3833	0.86335
14.3918	0.1883	14.3918	0.6548	14.392	1.02515	14.392	0.59345	14.3917	1.75735	14.392	1.2187	14.3918	1.4656	14.3917	0.86795
14.4002	0.18785	14.4002	0.63405	14.4003	1.0635	14.4003	0.6064	14.4	1.7558	14.4003	1.2559	14.4002	1.50835	14.4	0.87485
14.4085	0.18875	14.4085	0.61455	14.4087	1.10475	14.4087	0.62115	14.4083	1.75595	14.4087	1.29815	14.4085	1.55405	14.4083	0.88375
14.4168	0.18715	14.4168	0.59255	14.417	1.14875	14.417	0.63705	14.4167	1.75255	14.417	1.34375	14.4168	1.6	14.4167	0.8947
14.4252	0.1873	14.4252	0.57435	14.4253	1.1938	14.4253	0.65545	14.425	1.74955	14.4253	1.38865	14.4252	1.64435	14.425	0.9067
14.4335	0.18685	14.4335	0.55495	14.4337	1.24255	14.4337	0.6773	14.4333	1.7497	14.4337	1.43595	14.4335	1.69195	14.4333	0.9214
14.4418	0.18475	14.4418	0.532	14.442	1.29025	14.442	0.7006	14.4417	1.74785	14.442	1.4833	14.4418	1.73975	14.4417	0.93875
14.4502	0.1896	14.4502	0.5268	14.4503	1.3365	14.4503	0.72715	14.45	1.7466	14.4503	1.5327	14.4502	1.7855	14.45	0.9559
14.4585	0.1834	14.4585	0.506	14.4587	1.3833	14.4587	0.75685	14.4583	1.74545	14.4587	1.5791	14.4585	1.8287	14.4583	0.98225
14.4668	0.18605	14.4668	0.5382	14.467	1.4284	14.467	0.7839	14.4667	1.7434	14.467	1.6255	14.4668	1.8737	14.4667	1.0076
14.4752	0.18505	14.4752	0.5808	14.4753	1.47355	14.4753	0.8157	14.475	1.7416	14.4753	1.66685	14.4752	1.9135	14.475	1.03585
14.4835	0.1847	14.4835	0.44395	14.4837	1.51545	14.4837	0.84745	14.4833	1.73935	14.4837	1.7121	14.4835	1.95075	14.4833	1.0673
14.4918	0.1855	14.4918	0.44915	14.492	1.5532	14.492	0.8774	14.4917	1.73675	14.492	1.75185	14.4918	1.98235	14.4917	1.10055
14.5002	0.18365	14.5002	0.44975	14.5003	1.59265	14.5003	0.91155	14.5	1.73505	14.5003	1.74665	14.5002	2.01425	14.5	1.1375
14.5085	0.1858	14.5085	0.44105	14.5087	1.62535	14.5087	0.94335	14.5083	1.73315	14.5087	1.8996	14.5085	2.04	14.5083	1.17895
14.5168	0.1843	14.5168	0.4327	14.517	1.65615	14.517	0.97575	14.5167	1.73	14.517	1.8131	14.5168	2.06145	14.5167	1.2207
14.5252	0.1829	14.5252	0.4275	14.5253	1.67755	14.5253	1.00355	14.525	1.73025	14.5253	1.85915	14.5252	2.07485	14.525	1.2651
14.5335	0.18415	14.5335	0.42435	14.5337	1.69875	14.5337	1.032	14.5333	1.72935	14.5337	1.8975	14.5335	2.08495	14.5333	1.3112
14.5418	0.18375	14.5418	0.41945	14.542	1.71055	14.542	1.05755	14.5417	1.72675	14.542	1.90335	14.5418	2.0869	14.5417	1.3615
14.5502	0.1831	14.5502	0.41525	14.5503	1.7201	14.5503	1.07965	14.55	1.7267	14.5503	1.91485	14.5502	2.0869	14.55	1.4089
14.5585	0.1842	14.5585	0.4103	14.5587	1.7199	14.5587	1.09715	14.5583	1.72455	14.5587	1.9145	14.5585	2.07465	14.5583	1.45745
14.5668	0.18505	14.5668	0.4084	14.567	1.71535	14.567	1.11295	14.5667	1.7228	14.567	1.91025	14.5668	2.06165	14.5667	1.5079
14.5752	0.18345	14.5752	0.4072	14.5753	1.7063	14.5753	1.12345	14.575	1.7226	14.5753	1.90135	14.5752	2.04215	14.575	1.5524
14.5835	0.18545	14.5835	0.4037	14.5837	1.69025	14.5837	1.13045	14.5833	1.72085	14.5837	1.8854	14.5835	2.01735	14.5833	1.5996
14.5918	0.18395	14.5918	0.39995	14.592	1.6701	14.592	1.133	14.5917	1.72095	14.592	1.8613	14.5918	1.9882	14.5917	1.63985
14.6002	0.1851	14.6002	0.3985	14.6003	1.645	14.6003	1.13395	14.6	1.72095	14.6003	1.84085	14.6002	1.95355	14.6	1.68175
14.6085	0.1867	14.6085	0.3985	14.6087	1.61495	14.6087	1.1275	14.6083	1.72035	14.6087	1.81295	14.6085	1.9165	14.6083	1.7187
14.6168	0.18465	14.6168	0.39685	14.617	1.58	14.617	1.1186	14.6167	1.7173	14.617	1.7715	14.6168	1.8754	14.6167	1.75005
14.6252	0.1846	14.6252	0.3963	14.6253	1.54205	14.6253	1.10505	14.625	1.71945	14.6253	1.73845	14.6252	1.8298	14.625	1.77935
14.6335	0.18195	14.6335	0.39295	14.6337	1.50335	14.6337	1.0895	14.6333	1.71645	14.6337	1.69435	14.6335	1.78685	14.6333	1.80225
14.6418	0.1738	14.6418	0.3926	14.642	1.45905	14.642	1.06985	14.6417	1.7141	14.642	1.65185	14.6418	1.7414	14.6417	1.8177
14.6502	0.19065	14.6502	0.39075	14.6503	1.4146	14.6503	1.049	14.65	1.7122	14.6503	1.60555	14.6502	1.6916	14.65	1.82925
14.6585	0.18575	14.6585	0.39065	14.6587	1.3661	14.6587	1.0262	14.6583	1.712	14.6587	1.5582	14.6585	1.6442	14.6583	1.83355
14.6668	0.17735	14.6668	0.3921	14.667	1.31755	14.667	0.9991	14.6667	1.7094	14.667	1.50665	14.6668	1.5957	14.6667	1.83555
14.6752	0.17835	14.6752	0.39095	14.6753	1.2707	14.6753	0.97155	14.675	1.70865	14.6753	1.4606	14.6752	1.54775	14.675	1.8276
14.6835	0.1824	14.6835	0.3856	14.6837	1.2221	14.6837	0.9414	14.6833	1.7079	14.6837	1.41135	14.6835	1.5007	14.6833	1.81525
14.6918	0.18565	14.6918	0.3877	14.692	1.1763	14.692	0.9098	14.6917	1.7084	14.692	1.36615	14.6918	1.4587	14.6917	1.79505
14.7002	0.18625	14.7002	0.38555	14.7003	1.12785	14.7003	0.879	14.7	1.70665	14.7003	1.3176	14.7002	1.41485	14.7	1.77275
14.7085	0.18685	14.7085	0.3846	14.7087	1.08505	14.7087	0.8491	14.7083	1.70565	14.7087	1.27375	14.7085	1.3733	14.7083	1.74425
14.7168	0.1881	14.7168	0.3845	14.717	1.04285	14.717	0.8202	14.7167	1.7071	14.717	1.23035	14.7168	1.33565	14.7167	1.70915
14.7252	0.1873	14.7252	0.38285	14.7253	1.0019	14.7253	0.7881	14.725	1.70755	14.7253	1.19075	14.7252	1.3011	14.725	1.67265
14.7335	0.1847	14.7335	0.38125	14.7337	0.9635	14.7337	0.76105	14.7333	1.70755	14.7337	1.1532	14.7335	1.26735	14.7333	1.63075
14.7418	0.18485	14.7418	0.38115	14.742	0.9277	14.742	0.73095	14.7417	1.70925	14.742	1.12015	14.7418	1.23695	14.7417	1.5864
14.7502	0.18815	14.7502	0.3826	14.7503	0.8932	14.7503	0.70825	14.75	1.7105	14.7503	1.08475	14.7502	1.2108	14.75	1.5419
14.7585	0.18675	14.7585	0.3791	14.7587	0.86305	14.7587	0.6832	14.7583	1.7144	14.7587	1.05545	14.7585	1.18555	14.7583	1.494
14.7668	0.1858	14.7668	0.37685	14.767	0.8345	14.767	0.6623	14.7667	1.7199	14.767	1.02635	14.7668	1.1616	14.7667	1.44245
14.7752	0.18695	14.7752	0.37795	14.7753	0.8101	14.7753	0.64095	14.775	1.72715	14.7753	1.0047	14.7752	1.142	14.775	1.3936
14.7835	0.1876	14.7835	0.37555	14.7837	0.78805	14.7837	0.6227	14.7833	1.73585	14.7837	0.98035	14.7835	1.1243	14.7833	1.34395
14.7918	0.1865	14.7918	0.3751	14.792	0.76725	14.792	0.60545	14.7917	1.7476	14.792	0.9644	14.7918	1.10985	14.7917	1.29635
14.8002	0.18535	14.8002	0.37295	14.8003	0.7507	14.8003	0.5902	14.8	1.76285	14.8003	0.9483	14.8002	1.0994	14.8	1.2492
14.8085	0.187	14.8085	0.37385	14.8087	0.73385	14.8087	0.5762	14.8083	1.78165	14.8087	0.93305	14.8085	1.0864	14.8083	1.20365
14.8168	0.1872	14.8168	0.3714	14.817	0.7201	14.817	0.56245	14.8167	1.80325	14.817	0.91965	14.8168	1.074	14.8167	1.1591
14.8252	0.18855	14.8252	0.3702	14.8253	0.70575	14.8253	0.5528	14.825	1.83105	14.8253	0.9062	14.8252	1.06535	14.825	1.1168
14.8335	0.18665	14.8335	0.3714	14.8337	0.6962	14.8337	0.5418	14.8333	1.8622	14.8337	0.89665	14.8335	1.0587	14.8333	1.07535
14.8418	0.1879	14.8418	0.3687	14.842	0.68545	14.842	0.5348	14.8417	1.89985	14.842	0.8876	14.8418	1.0503	14.8417	1.0391
14.8502	0.18785	14.8502	0.36925	14.8503	0.68	14.8503	0.528	14.85	1.93735	14.8503	0.88	14.8502	1.04495	14.85	1.0033
14.8585	0.18695	14.8585	0.36865	14.8587	0.6725	14.8587	0.51795	14.8583	1.9802	14.8587	0.8725	14.8585	1.0398	14.8583	0.96855
14.8668	0.1851	14.8668	0.3667	14.867	0.6667	14.867	0.51275	14.8667	2.0241	14.867	0.86985	14.8668	1.03785	14.8667	0.93905
14.8752	0.18735	14.8752	0.36745	14.8753	0.6599	14.8753	0.5082	14.875	2.0708	14.8753	0.8622	14.8752	1.0305	14.875	0.91295
14.8835	0.18435	14.8835	0.3634	14.8837	0.65505	14.8837	0.5039	14.8833	2.1186	14.8837	0.86	14.8835	1.0283	14.8833	0.8878
14.8918	0.18885	14.8918	0.36385	14.892	0.65325	14.892	0.49995	14.8917	2.16235	14.892	0.85705	14.8918	1.02655	14.8917	0.8673
14.9002	0.1853	14.9002	0.36195	14.9003	0.64995	14.9003	0.4965	14.9	2.19865	14.9003	0.85475	14.9002	1.027	14.9	0.8449
14.9085	0.1859	14.9085	0.361	14.9087	0.6461	14.9087	0.4919	14.9083	2.23615	14.9087	0.85185	14.9085	1.02235	14.9083	0.8252
14.9168	0.1849	14.9168	0.3595	14.917	0.64575	14.917	0.4887	14.9167	2.2701	14.917	0.8518	14.9168	1.02085	14.9167	0.8122
14.9252	0.18535	14.9252	0.36095	14.9253	0.64565	14.9253	0.48555	14.925	2.29635	14.9253	0.85075	14.9252	1.02275	14.925	0.7974
14.9335	0.18465	14.9335	0.35955	14.9337	0.6432	14.9337	0.4843	14.9333	2.31735	14.9337	0.8491	14.9335	1.022	14.9333	0.78455
14.9418	0.1844	14.9418	0.35875	14.942	0.644	14.942	0.48105	14.9417	2.335	14.942	0.85	14.9418	1.02335	14.9417	0.7744
14.9502	0.1828	14.9502	0.3589	14.9503	0.6404	14.9503	0.4804	14.95	2.349	14.9503	0.8485	14.9502	1.02345	14.95	0.76475
14.9585	0.18125	14.9585	0.3564	14.9587	0.64235	14.9587	0.4793	14.9583	2.3584	14.9587	0.8495	14.9585	1.02575	14.9583	0.75585
14.9668	0.18425	14.9668	0.3595	14.967	0.6405	14.967	0.47775	14.9667	2.36235	14.967	0.85005	14.9668	1.0247	14.9667	0.7458
14.9752	0.1827	14.9752	0.3569	14.9753	0.64315	14.9753	0.478	14.975	2.3641	14.9753	0.85305	14.9752	1.0275	14.975	0.7397
14.9835	0.1836	14.9835	0.35715	14.9837	0.6454	14.9837	0.4755	14.9833	2.3588	14.9837	0.85565	14.9835	1.0305	14.9833	0.73575
14.9918	0.18345	14.9918	0.35575	14.992	0.6464	14.992	0.47605	14.9917	2.3517	14.992	0.85665	14.9918	1.0323	14.9917	0.72905
15.0002	0.18335	15.0002	0.35275	15.0003	0.6491	15.0003	0.4752	15	2.3416	15.0003	0.8594	15.0002	1.0341	15	0.7255
15.0085	0.1832	15.0085	0.3544	15.0087	0.64925	15.0087	0.47425	15.0083	2.3312	15.0087	0.8625	15.0085	1.0363	15.0083	0.71825
15.0168	0.1827	15.0168	0.35505	15.017	0.65035	15.017	0.47555	15.0167	2.31705	15.017	0.86485	15.0168	1.0387	15.0167	0.7174
15.0252	0.1837	15.0252	0.35495	15.0253	0.6536	15.0253	0.47575	15.025	2.30445	15.0253	0.86845	15.0252	1.04145	15.025	0.71465
15.0335	0.1818	15.0335	0.355	15.0337	0.6568	15.0337	0.47705	15.0333	2.2933	15.0337	0.8713	15.0335	1.0458	15.0333	0.7112
15.0418	0.1849	15.0418	0.3546	15.042	0.6597	15.042	0.4778	15.0417	2.2779	15.042	0.87535	15.0418	1.04765	15.0417	0.70915
15.0502	0.182	15.0502	0.3549	15.0503	0.6622	15.0503	0.48025	15.05	2.2679	15.0503	0.87775	15.0502	1.0508	15.05	0.70765
15.0585	0.1847	15.0585	0.35295	15.0587	0.6648	15.0587	0.4812	15.0583	2.25745	15.0587	0.88205	15.0585	1.05465	15.0583	0.70645
15.0668	0.1859	15.0668	0.353	15.067	0.66955	15.067	0.48125	15.0667	2.2487	15.067	0.8864	15.0668	1.05995	15.0667	0.7044
15.0752	0.183	15.0752	0.35325	15.0753	0.66905	15.0753	0.48355	15.075	2.2391	15.0753	0.88615	15.0752	1.06105	15.075	0.70415
15.0835	0.1843	15.0835	0.3538	15.0837	0.7085	15.0837	0.48325	15.0833	2.23275	15.0837	0.92705	15.0835	1.10045	15.0833	0.70395
15.0918	0.1833	15.0918	0.3523	15.092	0.7766	15.092	0.48555	15.0917	2.2281	15.092	0.99395	15.0918	1.1704	15.0917	0.705
15.1002	0.1823	15.1002	0.3529	15.1003	0.65375	15.1003	0.486	15.1	2.22235	15.1003	0.8717	15.1002	1.048	15.1	0.70505
15.1085	0.186	15.1085	0.3559	15.1087	0.7117	15.1087	0.48675	15.1083	2.21715	15.1087	0.9299	15.1085	1.1046	15.1083	0.7075
15.1168	0.18245	15.1168	0.35485	15.117	0.7012	15.117	0.48775	15.1167	2.21655	15.117	0.9186	15.1168	1.09495	15.1167	0.7077
15.1252	0.1846	15.1252	0.3562	15.1253	0.69595	15.1253	0.4881	15.125	2.21295	15.1253	0.9149	15.1252	1.0886	15.125	0.71205
15.1335	0.18455	15.1335	0.3551	15.1337	0.6967	15.1337	0.48795	15.1333	2.21235	15.1337	0.91625	15.1335	1.09285	15.1333	0.71075
15.1418	0.1825	15.1418	0.3552	15.142	0.6986	15.142	0.4883	15.1417	2.2141	15.142	0.9188	15.1418	1.0948	15.1417	0.70975
15.1502	0.18265	15.1502	0.35585	15.1503	0.704	15.1503	0.4905	15.15	2.2199	15.1503	0.9222	15.1502	1.0985	15.15	0.71355
15.1585	0.18095	15.1585	0.35385	15.1587	0.70475	15.1587	0.49055	15.1583	2.22605	15.1587	0.9254	15.1585	1.10105	15.1583	0.7163
15.1668	0.17955	15.1668	0.35455	15.167	0.70905	15.167	0.49165	15.1667	2.2338	15.167	0.92925	15.1668	1.1063	15.1667	0.71765
15.1752	0.1805	15.1752	0.3547	15.1753	0.70905	15.1753	0.4943	15.175	2.24385	15.1753	0.93165	15.1752	1.10715	15.175	0.72
15.1835	0.17985	15.1835	0.3553	15.1837	0.71235	15.1837	0.491	15.1833	2.25895	15.1837	0.93485	15.1835	1.10965	15.1833	0.7245
15.1918	0.17995	15.1918	0.35045	15.192	0.7153	15.192	0.49185	15.1917	2.27755	15.192	0.9376	15.1918	1.1089	15.1917	0.72695
15.2002	0.17985	15.2002	0.35435	15.2003	0.7141	15.2003	0.4936	15.2	2.3007	15.2003	0.93675	15.2002	1.111	15.2	0.7285
15.2085	0.18175	15.2085	0.35445	15.2087	0.71625	15.2087	0.49085	15.2083	2.32875	15.2087	0.93695	15.2085	1.11055	15.2083	0.732
15.2168	0.1805	15.2168	0.355	15.217	0.71505	15.217	0.49245	15.2167	2.3627	15.217	0.93745	15.2168	1.11085	15.2167	0.73555
15.2252	0.1811	15.2252	0.35455	15.2253	0.717	15.2253	0.49305	15.225	2.40025	15.2253	0.9365	15.2252	1.10905	15.225	0.73635
15.2335	0.18185	15.2335	0.3532	15.2337	0.7158	15.2337	0.4929	15.2333	2.4445	15.2337	0.9371	15.2335	1.10935	15.2333	0.73765
15.2418	0.1806	15.2418	0.3541	15.242	0.71445	15.242	0.49075	15.2417	2.49395	15.242	0.9354	15.2418	1.1059	15.2417	0.7414
15.2502	0.1798	15.2502	0.3546	15.2503	0.713	15.2503	0.4911	15.25	2.55245	15.2503	0.93295	15.2502	1.1025	15.25	0.741
15.2585	0.17935	15.2585	0.3539	15.2587	0.71185	15.2587	0.4929	15.2583	2.6146	15.2587	0.9319	15.2585	1.101	15.2583	0.74365
15.2668	0.181	15.2668	0.35325	15.267	0.71075	15.267	0.4939	15.2667	2.683	15.267	0.93135	15.2668	1.0984	15.2667	0.7437
15.2752	0.182	15.2752	0.3533	15.2753	0.7071	15.2753	0.493	15.275	2.76095	15.2753	0.92505	15.2752	1.09455	15.275	0.74945
15.2835	0.182	15.2835	0.3536	15.2837	0.7037	15.2837	0.4938	15.2833	2.84055	15.2837	0.9211	15.2835	1.0914	15.2833	0.75055
15.2918	0.1824	15.2918	0.3548	15.292	0.699	15.292	0.49395	15.2917	2.9224	15.292	0.9175	15.2918	1.08455	15.2917	0.74805
15.3002	0.18185	15.3002	0.35475	15.3003	0.6967	15.3003	0.4931	15.3	3.0068	15.3003	0.91465	15.3002	1.0815	15.3	0.74805
15.3085	0.1808	15.3085	0.3516	15.3087	0.69455	15.3087	0.49295	15.3083	3.09525	15.3087	0.90865	15.3085	1.07755	15.3083	0.74795
15.3168	0.17955	15.3168	0.3531	15.317	0.68815	15.317	0.4914	15.3167	3.18145	15.317	0.90205	15.3168	1.07155	15.3167	0.7516
15.3252	0.1808	15.3252	0.35125	15.3253	0.6827	15.3253	0.49105	15.325	3.26885	15.3253	0.89905	15.3252	1.0663	15.325	0.7527
15.3335	0.18135	15.3335	0.3515	15.3337	0.67805	15.3337	0.4923	15.3333	3.3539	15.3337	0.8922	15.3335	1.0609	15.3333	0.75315
15.3418	0.18045	15.3418	0.35055	15.342	0.6717	15.342	0.49045	15.3417	3.43285	15.342	0.88705	15.3418	1.0547	15.3417	0.7557
15.3502	0.17855	15.3502	0.34895	15.3503	0.669	15.3503	0.4893	15.35	3.50555	15.3503	0.88335	15.3502	1.0503	15.35	0.75805
15.3585	0.1798	15.3585	0.3491	15.3587	0.6649	15.3587	0.4883	15.3583	3.5707	15.3587	0.8808	15.3585	1.0478	15.3583	0.7598
15.3668	0.1787	15.3668	0.3479	15.367	0.6592	15.367	0.48685	15.3667	3.62505	15.367	0.87445	15.3668	1.042	15.3667	0.75935
15.3752	0.1781	15.3752	0.3473	15.3753	0.6561	15.3753	0.48725	15.375	3.66935	15.3753	0.87185	15.3752	1.03835	15.375	0.7619
15.3835	0.1775	15.3835	0.3459	15.3837	0.65095	15.3837	0.4881	15.3833	3.70295	15.3837	0.8676	15.3835	1.0336	15.3833	0.76365
15.3918	0.1768	15.3918	0.3446	15.392	0.64765	15.392	0.4867	15.3917	3.72495	15.392	0.86365	15.3918	1.0328	15.3917	0.76335
15.4002	0.17685	15.4002	0.3427	15.4003	0.6426	15.4003	0.48345	15.4	3.73405	15.4003	0.85945	15.4002	1.028	15.4	0.7656
15.4085	0.17735	15.4085	0.34515	15.4087	0.64	15.4087	0.48275	15.4083	3.72955	15.4087	0.85765	15.4085	1.0259	15.4083	0.7643
15.4168	0.176	15.4168	0.34205	15.417	0.63805	15.417	0.481	15.4167	3.71095	15.417	0.85565	15.4168	1.02485	15.4167	0.7669
15.4252	0.1758	15.4252	0.34215	15.4253	0.63485	15.4253	0.47955	15.425	3.6765	15.4253	0.85285	15.4252	1.0215	15.425	0.76725
15.4335	0.17845	15.4335	0.3449	15.4337	0.6315	15.4337	0.47765	15.4333	3.6361	15.4337	0.8501	15.4335	1.0178	15.4333	0.7671
15.4418	0.17705	15.4418	0.3424	15.442	0.6317	15.442	0.47735	15.4417	3.58135	15.442	0.8491	15.4418	1.0177	15.4417	0.769
15.4502	0.17545	15.4502	0.34165	15.4503	0.62915	15.4503	0.47705	15.45	3.5194	15.4503	0.849	15.4502	1.0167	15.45	0.76495
15.4585	0.1748	15.4585	0.33955	15.4587	0.6291	15.4587	0.47425	15.4583	3.44415	15.4587	0.84805	15.4585	1.01695	15.4583	0.76575
15.4668	0.1758	15.4668	0.3394	15.467	0.63055	15.467	0.4728	15.4667	3.36285	15.467	0.84725	15.4668	1.01825	15.4667	0.7632
15.4752	0.1791	15.4752	0.3406	15.4753	0.62785	15.4753	0.4725	15.475	3.271	15.4753	0.8463	15.4752	1.0139	15.475	0.76365
15.4835	0.1773	15.4835	0.3408	15.4837	0.6294	15.4837	0.47125	15.4833	3.1747	15.4837	0.8463	15.4835	1.0163	15.4833	0.76125
15.4918	0.17625	15.4918	0.33835	15.492	0.6287	15.492	0.47015	15.4917	3.07195	15.492	0.8452	15.4918	1.01635	15.4917	0.75555
15.5002	0.17555	15.5002	0.33995	15.5003	0.62825	15.5003	0.46915	15.5	2.96815	15.5003	0.8457	15.5002	1.01705	15.5	0.75275
15.5085	0.1767	15.5085	0.3404	15.5087	0.62635	15.5087	0.46905	15.5083	2.8632	15.5087	0.84435	15.5085	1.01405	15.5083	0.7527
15.5168	0.1773	15.5168	0.34165	15.517	0.63105	15.517	0.4684	15.5167	2.75945	15.517	0.8463	15.5168	1.0176	15.5167	0.75035
15.5252	0.1759	15.5252	0.3375	15.5253	0.6296	15.5253	0.46925	15.525	2.66125	15.5253	0.8459	15.5252	1.0173	15.525	0.7467
15.5335	0.17675	15.5335	0.33775	15.5337	0.62965	15.5337	0.46995	15.5333	2.5638	15.5337	0.8454	15.5335	1.01565	15.5333	0.74345
15.5418	0.1757	15.5418	0.3358	15.542	0.6288	15.542	0.46985	15.5417	2.47085	15.542	0.843	15.5418	1.01375	15.5417	0.74245
15.5502	0.17595	15.5502	0.33685	15.5503	0.6288	15.5503	0.4711	15.55	2.38195	15.5503	0.84535	15.5502	1.0148	15.55	0.7414
15.5585	0.1783	15.5585	0.33765	15.5587	0.6271	15.5587	0.4728	15.5583	2.30605	15.5587	0.8426	15.5585	1.0131	15.5583	0.7369
15.5668	0.1774	15.5668	0.33715	15.567	0.62855	15.567	0.4722	15.5667	2.2328	15.567	0.8444	15.5668	1.00985	15.5667	0.7351
15.5752	0.17755	15.5752	0.33555	15.5753	0.62705	15.5753	0.47285	15.575	2.16805	15.5753	0.8413	15.5752	1.0097	15.575	0.73255
15.5835	0.17375	15.5835	0.33455	15.5837	0.6262	15.5837	0.47425	15.5833	2.11145	15.5837	0.83895	15.5835	1.00845	15.5833	0.73215
15.5918	0.175	15.5918	0.3363	15.592	0.62585	15.592	0.4757	15.5917	2.0607	15.592	0.84035	15.5918	1.0073	15.5917	0.7303
15.6002	0.17745	15.6002	0.3367	15.6003	0.62335	15.6003	0.47695	15.6	2.0152	15.6003	0.83695	15.6002	1.00545	15.6	0.7286
15.6085	0.17735	15.6085	0.33435	15.6087	0.62145	15.6087	0.47715	15.6083	1.9764	15.6087	0.83585	15.6085	1.0035	15.6083	0.7269
15.6168	0.17555	15.6168	0.33285	15.617	0.61945	15.617	0.4784	15.6167	1.94215	15.617	0.8353	15.6168	0.99925	15.6167	0.72535
15.6252	0.1758	15.6252	0.33455	15.6253	0.61945	15.6253	0.4808	15.625	1.9133	15.6253	0.8259	15.6252	0.99835	15.625	0.73085
15.6335	0.1745	15.6335	0.334	15.6337	0.6163	15.6337	0.47975	15.6333	1.89	15.6337	0.80845	15.6335	0.99695	15.6333	0.72405
15.6418	0.176	15.6418	0.33405	15.642	0.6144	15.642	0.4786	15.6417	1.86925	15.642	0.78315	15.6418	0.9927	15.6417	0.72325
15.6502	0.1745	15.6502	0.33005	15.6503	0.61285	15.6503	0.4802	15.65	1.85375	15.6503	0.9343	15.6502	0.99035	15.65	0.72205
15.6585	0.17375	15.6585	0.33195	15.6587	0.6093	15.6587	0.47985	15.6583	1.84055	15.6587	0.8704	15.6585	0.9873	15.6583	0.72175
15.6668	0.1738	15.6668	0.3329	15.667	0.6073	15.667	0.47855	15.6667	1.8288	15.667	0.80535	15.6668	0.98445	15.6667	0.72115
15.6752	0.17215	15.6752	0.33115	15.6753	0.60705	15.6753	0.4776	15.675	1.8229	15.6753	0.8099	15.6752	0.9845	15.675	0.72045
15.6835	0.17155	15.6835	0.33065	15.6837	0.60355	15.6837	0.476	15.6833	1.81915	15.6837	0.80785	15.6835	0.98055	15.6833	0.71965
15.6918	0.17235	15.6918	0.32965	15.692	0.6006	15.692	0.4758	15.6917	1.8191	15.692	0.80435	15.6918	0.9769	15.6917	0.72135
15.7002	0.1733	15.7002	0.3293	15.7003	0.59895	15.7003	0.47435	15.7	1.8247	15.7003	0.8014	15.7002	0.97645	15.7	0.72265
15.7085	0.17245	15.7085	0.32845	15.7087	0.59755	15.7087	0.4748	15.7083	1.8313	15.7087	0.7981	15.7085	0.97255	15.7083	0.72145
15.7168	0.1749	15.7168	0.3297	15.717	0.5934	15.717	0.4746	15.7167	1.84805	15.717	0.79255	15.7168	0.96785	15.7167	0.7216
15.7252	0.17105	15.7252	0.3265	15.7253	0.59435	15.7253	0.47205	15.725	1.86525	15.7253	0.7918	15.7252	0.9658	15.725	0.71885
15.7335	0.17225	15.7335	0.32675	15.7337	0.59135	15.7337	0.46915	15.7333	1.8902	15.7337	0.7889	15.7335	0.9647	15.7333	0.71865
15.7418	0.17405	15.7418	0.32855	15.742	0.5909	15.742	0.4671	15.7417	1.9224	15.742	0.78745	15.7418	0.9642	15.7417	0.7143
15.7502	0.17475	15.7502	0.32985	15.7503	0.5898	15.7503	0.4648	15.75	1.967	15.7503	0.7845	15.7502	0.96225	15.75	0.71475
15.7585	0.1721	15.7585	0.3288	15.7587	0.5871	15.7587	0.46295	15.7583	2.01765	15.7587	0.7809	15.7585	0.96125	15.7583	0.71565
15.7668	0.17175	15.7668	0.3301	15.767	0.58695	15.767	0.4586	15.7667	2.0777	15.767	0.77865	15.7668	0.9599	15.7667	0.7127
15.7752	0.1726	15.7752	0.32815	15.7753	0.58715	15.7753	0.4563	15.775	2.14685	15.7753	0.77855	15.7752	0.957	15.775	0.71155
15.7835	0.1715	15.7835	0.32705	15.7837	0.58725	15.7837	0.45655	15.7833	2.2253	15.7837	0.77455	15.7835	0.95705	15.7833	0.7081
15.7918	0.17225	15.7918	0.32875	15.792	0.5867	15.792	0.4531	15.7917	2.312	15.792	0.7713	15.7918	0.9562	15.7917	0.7045
15.8002	0.1742	15.8002	0.3274	15.8003	0.58695	15.8003	0.45095	15.8	2.40595	15.8003	0.76925	15.8002	0.9541	15.8	0.70355
15.8085	0.17375	15.8085	0.3274	15.8087	0.587	15.8087	0.4494	15.8083	2.5055	15.8087	0.7669	15.8085	0.95195	15.8083	0.7009
15.8168	0.172	15.8168	0.327	15.817	0.59165	15.817	0.4473	15.8167	2.6062	15.817	0.7678	15.8168	0.953	15.8167	0.69895
15.8252	0.17245	15.8252	0.32455	15.8253	0.5915	15.8253	0.4439	15.825	2.7105	15.8253	0.7658	15.8252	0.9528	15.825	0.6963
15.8335	0.17105	15.8335	0.32435	15.8337	0.595	15.8337	0.44535	15.8333	2.8123	15.8337	0.76445	15.8335	0.95215	15.8333	0.69405
15.8418	0.17025	15.8418	0.32195	15.842	0.59585	15.842	0.44275	15.8417	2.9106	15.842	0.7644	15.8418	0.95195	15.8417	0.68955
15.8502	0.1708	15.8502	0.3228	15.8503	0.6017	15.8503	0.44155	15.85	2.9996	15.8503	0.76355	15.8502	0.95265	15.85	0.6849
15.8585	0.16965	15.8585	0.32205	15.8587	0.60245	15.8587	0.43805	15.8583	3.0777	15.8587	0.7626	15.8585	0.9519	15.8583	0.68455
15.8668	0.17	15.8668	0.32385	15.867	0.60855	15.867	0.4361	15.8667	3.1425	15.867	0.7637	15.8668	0.95645	15.8667	0.68105
15.8752	0.16975	15.8752	0.32235	15.8753	0.6102	15.8753	0.4355	15.875	3.19545	15.8753	0.76205	15.8752	0.95455	15.875	0.6786
15.8835	0.1718	15.8835	0.3253	15.8837	0.6159	15.8837	0.4344	15.8833	3.2333	15.8837	0.7616	15.8835	0.9563	15.8833	0.6735
15.8918	0.17015	15.8918	0.3225	15.892	0.6209	15.892	0.43195	15.8917	3.25495	15.892	0.76285	15.8918	0.95975	15.8917	0.6714
15.9002	0.1718	15.9002	0.32285	15.9003	0.62715	15.9003	0.4328	15.9	3.2616	15.9003	0.76455	15.9002	0.962	15.9	0.6673
15.9085	0.1722	15.9085	0.3241	15.9087	0.63285	15.9087	0.4286	15.9083	3.25035	15.9087	0.76515	15.9085	0.9635	15.9083	0.66875
15.9168	0.17185	15.9168	0.32415	15.917	0.637	15.917	0.42915	15.9167	3.22565	15.917	0.76595	15.9168	0.96645	15.9167	0.66535
15.9252	0.17145	15.9252	0.32215	15.9253	0.6446	15.9253	0.42625	15.925	3.18675	15.9253	0.7692	15.9252	0.9691	15.925	0.66445
15.9335	0.17485	15.9335	0.32615	15.9337	0.65155	15.9337	0.4262	15.9333	3.1353	15.9337	0.77025	15.9335	0.97415	15.9333	0.66185
15.9418	0.17195	15.9418	0.32345	15.942	0.6577	15.942	0.42385	15.9417	3.07185	15.942	0.7724	15.9418	0.97685	15.9417	0.66145
15.9502	0.17085	15.9502	0.3235	15.9503	0.66485	15.9503	0.4236	15.95	3.0026	15.9503	0.7738	15.9502	0.9798	15.95	0.6588
15.9585	0.17145	15.9585	0.3251	15.9587	0.6714	15.9587	0.42345	15.9583	2.9279	15.9587	0.77645	15.9585	0.98625	15.9583	0.66065
15.9668	0.1727	15.9668	0.3229	15.967	0.67765	15.967	0.42275	15.9667	2.8487	15.967	0.7791	15.9668	0.98975	15.9667	0.6584
15.9752	0.1713	15.9752	0.3239	15.9753	0.68585	15.9753	0.42045	15.975	2.76675	15.9753	0.78315	15.9752	0.9957	15.975	0.65925
15.9835	0.1709	15.9835	0.32415	15.9837	0.69095	15.9837	0.4222	15.9833	2.6882	15.9837	0.78645	15.9835	1.0014	15.9833	0.65935
15.9918	0.17175	15.9918	0.324	15.992	0.6995	15.992	0.42115	15.9917	2.60825	15.992	0.78875	15.9918	1.0068	15.9917	0.658
16.0002	0.1714	16.0002	0.3216	16.0003	0.7051	16.0003	0.41915	16	2.53315	16.0003	0.79445	16.0002	1.0129	16	0.6588
16.0085	0.1709	16.0085	0.3238	16.0087	0.7122	16.0087	0.4184	16.0083	2.46005	16.0087	0.79885	16.0085	1.01905	16.0083	0.65755
16.0168	0.1711	16.0168	0.3229	16.017	0.7163	16.017	0.42015	16.0167	2.3947	16.017	0.80245	16.0168	1.02495	16.0167	0.66035
16.0252	0.17085	16.0252	0.3219	16.0253	0.72215	16.0253	0.4189	16.025	2.3332	16.0253	0.80555	16.0252	1.0317	16.025	0.65895
16.0335	0.17045	16.0335	0.3219	16.0337	0.7293	16.0337	0.42055	16.0333	2.2743	16.0337	0.81145	16.0335	1.0384	16.0333	0.66095
16.0418	0.17045	16.0418	0.32345	16.042	0.73465	16.042	0.41795	16.0417	2.2221	16.042	0.8152	16.0418	1.0456	16.0417	0.663
16.0502	0.1694	16.0502	0.32255	16.0503	0.73815	16.0503	0.41795	16.05	2.17425	16.0503	0.8189	16.0502	1.05045	16.05	0.66405
16.0585	0.17	16.0585	0.32285	16.0587	0.74365	16.0587	0.42035	16.0583	2.13295	16.0587	0.8265	16.0585	1.05985	16.0583	0.66395
16.0668	0.1718	16.0668	0.3226	16.067	0.7469	16.067	0.42015	16.0667	2.09275	16.067	0.8314	16.0668	1.06505	16.0667	0.6651
16.0752	0.17	16.0752	0.32325	16.0753	0.7525	16.0753	0.41825	16.075	2.0602	16.0753	0.83695	16.0752	1.07285	16.075	0.6648
16.0835	0.1695	16.0835	0.3209	16.0837	0.7531	16.0837	0.41925	16.0833	2.02795	16.0837	0.84115	16.0835	1.07625	16.0833	0.66825
16.0918	0.1671	16.0918	0.32025	16.092	0.75745	16.092	0.4223	16.0917	1.9999	16.092	0.84605	16.0918	1.0832	16.0917	0.6689
16.1002	0.1665	16.1002	0.3195	16.1003	0.75785	16.1003	0.42195	16.1	1.97135	16.1003	0.8503	16.1002	1.0884	16.1	0.67135
16.1085	0.1684	16.1085	0.3234	16.1087	0.75995	16.1087	0.4216	16.1083	1.94585	16.1087	0.8545	16.1085	1.09295	16.1083	0.66985
16.1168	0.1678	16.1168	0.32345	16.117	0.7618	16.117	0.42395	16.1167	1.9235	16.117	0.8615	16.1168	1.09895	16.1167	0.67355
16.1252	0.16675	16.1252	0.3222	16.1253	0.76105	16.1253	0.4246	16.125	1.90225	16.1253	0.86415	16.1252	1.1026	16.125	0.67355
16.1335	0.16805	16.1335	0.32255	16.1337	0.76155	16.1337	0.42615	16.1333	1.8823	16.1337	0.867	16.1335	1.10565	16.1333	0.673651
16.1418	0.16745	16.1418	0.3232	16.142	0.76025	16.142	0.4288	16.1417	1.86335	16.142	0.8702	16.1418	1.1093	16.1417	0.675901
16.1502	0.1684	16.1502	0.32245	16.1503	0.76055	16.1503	0.4282	16.15	1.8472	16.1503	0.87525	16.1502	1.114	16.15	0.677451
16.1585	0.16875	16.1585	0.32335	16.1587	0.75725	16.1587	0.4314	16.1583	1.8325	16.1587	0.87705	16.1585	1.11285	16.1583	0.679401
16.1668	0.1671	16.1668	0.32305	16.167	0.7553	16.167	0.43235	16.1667	1.8171	16.167	0.8795	16.1668	1.11035	16.1667	0.681001
16.1752	0.16515	16.1752	0.3232	16.1753	0.75225	16.1753	0.4321	16.175	1.801	16.1753	0.88055	16.1752	1.07935	16.175	0.682101
16.1835	0.16465	16.1835	0.3208	16.1837	0.7509	16.1837	0.43245	16.1833	1.7857	16.1837	0.88345	16.1835	1.0356	16.1833	0.681751
16.1918	0.166	16.1918	0.32075	16.192	0.7498	16.192	0.4362	16.1917	1.77455	16.192	0.88425	16.1918	1.1817	16.1917	0.683201
16.2002	0.166	16.2002	0.3211	16.2003	0.746	16.2003	0.435	16.2	1.76125	16.2003	0.88485	16.2002	1.09645	16.2	0.685051
16.2085	0.16195	16.2085	0.3199	16.2087	0.74365	16.2087	0.43715	16.2083	1.75235	16.2087	0.88705	16.2085	1.0939	16.2083	0.685101
16.2168	0.16055	16.2168	0.31975	16.217	0.74165	16.217	0.43845	16.2167	1.74405	16.217	0.88625	16.2168	1.114	16.2167	0.687351
16.2252	0.1619	16.2252	0.31945	16.2253	0.738	16.2253	0.43895	16.225	1.7353	16.2253	0.8864	16.2252	1.1175	16.225	0.689901
16.2335	0.161	16.2335	0.31845	16.2337	0.7374	16.2337	0.44145	16.2333	1.72685	16.2337	0.88875	16.2335	1.11935	16.2333	0.691351
16.2418	0.16255	16.2418	0.3187	16.242	0.73505	16.242	0.44085	16.2417	1.7221	16.242	0.8904	16.2418	1.1183	16.2417	0.691751
16.2502	0.1593	16.2502	0.3159	16.2503	0.73185	16.2503	0.4391	16.25	1.71515	16.2503	0.8881	16.2502	1.11765	16.25	0.693851
16.2585	0.1611	16.2585	0.31725	16.2587	0.72765	16.2587	0.443	16.2583	1.71165	16.2587	0.8876	16.2585	1.11625	16.2583	0.693751
16.2668	0.15905	16.2668	0.3164	16.267	0.7263	16.267	0.44475	16.2667	1.70665	16.267	0.88765	16.2668	1.1152	16.2667	0.696051
16.2752	0.16	16.2752	0.3155	16.2753	0.7215	16.2753	0.4451	16.275	1.7049	16.2753	0.88665	16.2752	1.1119	16.275	0.694651
16.2835	0.1608	16.2835	0.31705	16.2837	0.71825	16.2837	0.44875	16.2833	1.698	16.2837	0.8835	16.2835	1.10885	16.2833	0.698201
16.2918	0.15985	16.2918	0.3168	16.292	0.7165	16.292	0.4497	16.2917	1.69385	16.292	0.88715	16.2918	1.10705	16.2917	0.698701
16.3002	0.1602	16.3002	0.3208	16.3003	0.7151	16.3003	0.4489	16.3	1.6914	16.3003	0.8871	16.3002	1.1076	16.3	0.700901
16.3085	0.1578	16.3085	0.319	16.3087	0.71065	16.3087	0.4503	16.3083	1.6893	16.3087	0.88575	16.3085	1.1057	16.3083	0.701401
16.3168	0.1608	16.3168	0.3184	16.317	0.7098	16.317	0.45195	16.3167	1.6849	16.317	0.8839	16.3168	1.1049	16.3167	0.701751
16.3252	0.16015	16.3252	0.3174	16.3253	0.70375	16.3253	0.45265	16.325	1.6843	16.3253	0.88055	16.3252	1.1007	16.325	0.700701
16.3335	0.15775	16.3335	0.31595	16.3337	0.70195	16.3337	0.45475	16.3333	1.6828	16.3337	0.88075	16.3335	1.10055	16.3333	0.706201
16.3418	0.1602	16.3418	0.3178	16.342	0.69775	16.342	0.4535	16.3417	1.68195	16.342	0.88035	16.3418	1.0989	16.3417	0.706801
16.3502	0.15715	16.3502	0.31875	16.3503	0.69535	16.3503	0.45475	16.35	1.6809	16.3503	0.87725	16.3502	1.0939	16.35	0.707701
16.3585	0.15725	16.3585	0.31885	16.3587	0.6919	16.3587	0.45745	16.3583	1.67915	16.3587	0.87715	16.3585	1.09535	16.3583	0.707201
16.3668	0.1564	16.3668	0.3165	16.367	0.68695	16.367	0.4574	16.3667	1.6801	16.367	0.875	16.3668	1.0904	16.3667	0.707251
16.3752	0.1573	16.3752	0.31645	16.3753	0.68535	16.3753	0.45795	16.375	1.68115	16.3753	0.87395	16.3752	1.0885	16.375	0.706501
16.3835	0.15835	16.3835	0.3187	16.3837	0.68445	16.3837	0.4582	16.3833	1.6827	16.3837	0.87365	16.3835	1.08975	16.3833	0.710001
16.3918	0.15385	16.3918	0.3155	16.392	0.6816	16.392	0.45785	16.3917	1.68445	16.392	0.87155	16.3918	1.04155	16.3917	0.711651
16.4002	0.1548	16.4002	0.31585	16.4003	0.6771	16.4003	0.4583	16.4	1.68655	16.4003	0.8696	16.4002	1.0574	16.4	0.710351
16.4085	0.15645	16.4085	0.3174	16.4087	0.6767	16.4087	0.4595	16.4083	1.69045	16.4087	0.8679	16.4085	1.149	16.4083	0.710151
16.4168	0.15725	16.4168	0.3186	16.417	0.67175	16.417	0.4575	16.4167	1.69275	16.417	0.8682	16.4168	1.05755	16.4167	0.710401
16.4252	0.156	16.4252	0.31715	16.4253	0.67085	16.4253	0.4597	16.425	1.70015	16.4253	0.86745	16.4252	1.08105	16.425	0.708401
16.4335	0.15635	16.4335	0.31745	16.4337	0.66905	16.4337	0.4592	16.4333	1.7078	16.4337	0.8678	16.4335	1.08735	16.4333	0.706751
16.4418	0.1573	16.4418	0.31765	16.442	0.6683	16.442	0.4585	16.4417	1.7149	16.442	0.8665	16.4418	1.07755	16.4417	0.708701
16.4502	0.1538	16.4502	0.3167	16.4503	0.6692	16.4503	0.4591	16.45	1.72405	16.4503	0.86925	16.4502	1.07445	16.45	0.707401
16.4585	0.1577	16.4585	0.3184	16.4587	0.6646	16.4587	0.45775	16.4583	1.73625	16.4587	0.86655	16.4585	1.0733	16.4583	0.706501
16.4668	0.1531	16.4668	0.31535	16.467	0.66435	16.467	0.4588	16.4667	1.74805	16.467	0.8667	16.4668	1.07725	16.4667	0.710001
16.4752	0.1552	16.4752	0.31665	16.4753	0.6637	16.4753	0.4582	16.475	1.7628	16.4753	0.86825	16.4752	1.07795	16.475	0.708551
16.4835	0.15595	16.4835	0.31655	16.4837	0.6644	16.4837	0.457	16.4833	1.7754	16.4837	0.87055	16.4835	1.07815	16.4833	0.705051
16.4918	0.1581	16.4918	0.3182	16.492	0.66425	16.492	0.45595	16.4917	1.7904	16.492	0.8717	16.4918	1.083	16.4917	0.706001
16.5002	0.156	16.5002	0.31745	16.5003	0.6656	16.5003	0.4559	16.5	1.8093	16.5003	0.8737	16.5002	1.0827	16.5	0.704351
16.5085	0.15665	16.5085	0.31505	16.5087	0.6653	16.5087	0.45665	16.5083	1.82965	16.5087	0.87455	16.5085	1.08285	16.5083	0.704701
16.5168	0.1569	16.5168	0.318	16.517	0.66505	16.517	0.4529	16.5167	1.84965	16.517	0.87855	16.5168	1.0858	16.5167	0.704401
16.5252	0.15655	16.5252	0.3177	16.5253	0.6664	16.5253	0.45375	16.525	1.87255	16.5253	0.87975	16.5252	1.08595	16.525	0.703351
16.5335	0.1562	16.5335	0.31615	16.5337	0.67095	16.5337	0.4527	16.5333	1.89505	16.5337	0.8841	16.5335	1.09075	16.5333	0.702951
16.5418	0.1593	16.5418	0.3185	16.542	0.67265	16.542	0.4523	16.5417	1.91775	16.542	0.8908	16.5418	1.09475	16.5417	0.703601
16.5502	0.1577	16.5502	0.3161	16.5503	0.67435	16.5503	0.44815	16.55	1.9387	16.5503	0.8923	16.5502	1.09935	16.55	0.702851
16.5585	0.16235	16.5585	0.318	16.5587	0.6791	16.5587	0.44915	16.5583	1.96305	16.5587	0.89785	16.5585	1.1019	16.5583	0.704351
16.5668	0.1614	16.5668	0.31865	16.567	0.68005	16.567	0.4489	16.5667	1.9858	16.567	0.90355	16.5668	1.1077	16.5667	0.703951
16.5752	0.16305	16.5752	0.32035	16.5753	0.68455	16.5753	0.44775	16.575	2.00475	16.5753	0.9072	16.5752	1.1109	16.575	0.704651
16.5835	0.16375	16.5835	0.3195	16.5837	0.68785	16.5837	0.44795	16.5833	2.0282	16.5837	0.913	16.5835	1.11585	16.5833	0.706951
16.5918	0.1643	16.5918	0.32115	16.592	0.6928	16.592	0.4492	16.5917	2.0517	16.592	0.91815	16.5918	1.12115	16.5917	0.708451
16.6002	0.16645	16.6002	0.3216	16.6003	0.6952	16.6003	0.447	16.6	2.0692	16.6003	0.9236	16.6002	1.12115	16.6	0.708851
16.6085	0.167	16.6085	0.32185	16.6087	0.6968	16.6087	0.44845	16.6083	2.0862	16.6087	0.9291	16.6085	1.1266	16.6083	0.714251
16.6168	0.1676	16.6168	0.325	16.617	0.70175	16.617	0.44925	16.6167	2.10255	16.617	0.93415	16.6168	1.13025	16.6167	0.715801
16.6252	0.16755	16.6252	0.32365	16.6253	0.70355	16.6253	0.4499	16.625	2.11405	16.6253	0.93695	16.6252	1.13495	16.625	0.720551
16.6335	0.16935	16.6335	0.3249	16.6337	0.70775	16.6337	0.44875	16.6333	2.12705	16.6337	0.9419	16.6335	1.1394	16.6333	0.723701
[truncated: 4,606 more rows]
