# Supplementary material for: A moonlighting function of a chitin polysaccharide monooxygenase, CWR-1, in Neurospora crassa allorecognition
Source: eLife. 2022 Aug 30;11:e80459. doi: 10.7554/eLife.80459 (PMC9550227; doi:10.7554/eLife.80459)
Supplement: Figure 4—source data 7. — Blank subtracted HPAEC-PAD traces. The samples were prepared as described in ‘Materials and methods.’ The time and nC response are listed in the table. [file elife-80459-fig4-data7.xlsx]

## Sheet: Sheet1
Figure 4G Source Data (cwr-1HG1 cwr-2HG1 ; cwr-1HG2 CW)
cwr-1HG1 cwr-2HG1 ; cwr-1HG2 CW		cwr-1HG1 cwr-2HG1 ; cwr-1HG2 CW + Asc.		HG1		HG2		HG3		HG4		HG5		HG6
time	nC	time	nC	time	nC	time	nC	time	nC	time	nC	time	nC	time	nC
0.000167	0.585	0.000333	0.44975	0.000333	0.98975	0	1.0502	0.000167	0.5849	0	0.6893	0.000333	0.8561	0.000333	0.8157
0.0085	0.57355	0.008667	0.41455	0.008667	0.9627	0.008333	1.02115	0.0085	0.55225	0.008333	0.6635	0.008667	0.8311	0.008667	0.78995
0.016833	0.5625	0.017	0.41445	0.017	0.95165	0.016667	1.0093	0.016833	0.54495	0.016667	0.6532	0.017	0.81935	0.017	0.77785
0.025167	0.56515	0.025333	0.4183	0.025333	0.9592	0.025	1.01575	0.025167	0.54985	0.025	0.6584	0.025333	0.827	0.025333	0.78385
0.0335	0.5666	0.033667	0.41985	0.033667	0.9641	0.033333	1.01935	0.0335	0.5532	0.033333	0.66365	0.033667	0.8288	0.033667	0.78735
0.041833	0.5663	0.042	0.4202	0.042	0.9646	0.041667	1.02175	0.041833	0.55425	0.041667	0.66295	0.042	0.82925	0.042	0.78895
0.050167	0.56925	0.050333	0.424	0.050333	0.9642	0.05	1.0225	0.050167	0.5537	0.05	0.66275	0.050333	0.8307	0.050333	0.78875
0.0585	0.57095	0.058667	0.4226	0.058667	0.963	0.058333	1.0215	0.0585	0.552	0.058333	0.6612	0.058667	0.82985	0.058667	0.7879
0.066833	0.5687	0.067	0.42155	0.067	0.96305	0.066667	1.02095	0.066833	0.5524	0.066667	0.66195	0.067	0.82885	0.067	0.78745
0.075167	0.5713	0.075333	0.42365	0.075333	0.9643	0.075	1.02195	0.075167	0.5516	0.075	0.66185	0.075333	0.8305	0.075333	0.78745
0.0835	0.5701	0.083667	0.42385	0.083667	0.9641	0.083333	1.02215	0.0835	0.55055	0.083333	0.6616	0.083667	0.8309	0.083667	0.7875
0.091833	0.57085	0.092	0.424	0.092	0.96555	0.091667	1.02185	0.091833	0.5511	0.091667	0.6627	0.092	0.83005	0.092	0.7889
0.100167	0.5705	0.100333	0.42405	0.100333	0.96465	0.1	1.0231	0.100167	0.552	0.1	0.6621	0.100333	0.8298	0.100333	0.7888
0.1085	0.5711	0.108667	0.42485	0.108667	0.9659	0.108333	1.0243	0.1085	0.5535	0.108333	0.6622	0.108667	0.8317	0.108667	0.78925
0.116833	0.5707	0.117	0.42595	0.117	0.9664	0.116667	1.02365	0.116833	0.55195	0.116667	0.66285	0.117	0.8317	0.117	0.79085
0.125167	0.5727	0.125333	0.4262	0.125333	0.9668	0.125	1.025	0.125167	0.5518	0.125	0.66215	0.125333	0.83185	0.125333	0.79035
0.1335	0.57295	0.133667	0.42675	0.133667	0.9664	0.133333	1.02625	0.1335	0.55255	0.133333	0.6627	0.133667	0.83395	0.133667	0.7902
0.141833	0.5749	0.142	0.4317	0.142	0.9652	0.141667	1.0266	0.141833	0.55285	0.141667	0.661	0.142	0.8319	0.142	0.7897
0.150167	0.57425	0.150333	0.4282	0.150333	0.9667	0.15	1.0286	0.150167	0.55365	0.15	0.66365	0.150333	0.8336	0.150333	0.79225
0.1585	0.57475	0.158667	0.42705	0.158667	0.96705	0.158333	1.02905	0.1585	0.5525	0.158333	0.6634	0.158667	0.83255	0.158667	0.7914
0.166833	0.57725	0.167	0.4269	0.167	0.9677	0.166667	1.0273	0.166833	0.5524	0.166667	0.66235	0.167	0.8329	0.167	0.792
0.175167	0.5747	0.175333	0.42785	0.175333	0.9709	0.175	1.03125	0.175167	0.55605	0.175	0.66565	0.175333	0.8363	0.175333	0.7948
0.1835	0.5757	0.183667	0.4287	0.183667	0.97175	0.183333	1.03265	0.1835	0.5555	0.183333	0.6671	0.183667	0.83775	0.183667	0.7958
0.191833	0.57685	0.192	0.42795	0.192	0.97105	0.191667	1.03345	0.191833	0.55585	0.191667	0.66755	0.192	0.8373	0.192	0.7942
0.200167	0.57705	0.200333	0.42965	0.200333	0.9701	0.2	1.0318	0.200167	0.55485	0.2	0.66595	0.200333	0.8375	0.200333	0.79575
0.2085	0.5786	0.208667	0.42925	0.208667	0.9709	0.208333	1.03305	0.2085	0.55455	0.208333	0.667	0.208667	0.8384	0.208667	0.7959
0.216833	0.5756	0.217	0.4284	0.217	0.97055	0.216667	1.0339	0.216833	0.5541	0.216667	0.6664	0.217	0.83765	0.217	0.7958
0.225167	0.57905	0.225333	0.42885	0.225333	0.97295	0.225	1.0348	0.225167	0.55385	0.225	0.66865	0.225333	0.83955	0.225333	0.79565
0.2335	0.57995	0.233667	0.4312	0.233667	0.9728	0.233333	1.03445	0.2335	0.55395	0.233333	0.66715	0.233667	0.8396	0.233667	0.79585
0.241833	0.5808	0.242	0.43235	0.242	0.97395	0.241667	1.0366	0.241833	0.55575	0.241667	0.6689	0.242	0.8408	0.242	0.79645
0.250167	0.5789	0.250333	0.43075	0.250333	0.97485	0.25	1.0372	0.250167	0.5554	0.25	0.6686	0.250333	0.8419	0.250333	0.7971
0.2585	0.5791	0.258667	0.43155	0.258667	0.97285	0.258333	1.0367	0.2585	0.5547	0.258333	0.66805	0.258667	0.84125	0.258667	0.79595
0.266833	0.58035	0.267	0.4317	0.267	0.97445	0.266667	1.03725	0.266833	0.5551	0.266667	0.6683	0.267	0.8408	0.267	0.79665
0.275167	0.583	0.275333	0.4344	0.275333	0.97725	0.275	1.0396	0.275167	0.5564	0.275	0.67065	0.275333	0.84115	0.275333	0.7975
0.2835	0.58175	0.283667	0.43245	0.283667	0.97885	0.283333	1.0399	0.2835	0.5557	0.283333	0.671	0.283667	0.8425	0.283667	0.7969
0.291833	0.587	0.292	0.4325	0.292	0.98055	0.291667	1.0401	0.291833	0.55545	0.291667	0.67095	0.292	0.84195	0.292	0.7991
0.300167	0.5759	0.300333	0.4336	0.300333	0.9791	0.3	1.03845	0.300167	0.55635	0.3	0.6696	0.300333	0.8408	0.300333	0.80015
0.3085	0.58205	0.308667	0.4337	0.308667	0.9705	0.308333	1.03995	0.3085	0.55685	0.308333	0.6712	0.308667	0.8426	0.308667	0.7998
0.316833	0.58295	0.317	0.43375	0.317	0.97255	0.316667	1.0398	0.316833	0.55635	0.316667	0.6707	0.317	0.84225	0.317	0.80005
0.325167	0.58165	0.325333	0.43495	0.325333	0.9766	0.325	1.0421	0.325167	0.5581	0.325	0.6708	0.325333	0.84355	0.325333	0.80175
0.3335	0.5835	0.333667	0.43505	0.333667	0.97935	0.333333	1.043	0.3335	0.55775	0.333333	0.6712	0.333667	0.8441	0.333667	0.802
0.341833	0.58305	0.342	0.43485	0.342	0.9802	0.341667	1.0433	0.341833	0.55855	0.341667	0.67105	0.342	0.8446	0.342	0.8019
0.350167	0.5827	0.350333	0.43555	0.350333	0.97685	0.35	1.04185	0.350167	0.55675	0.35	0.66985	0.350333	0.84305	0.350333	0.8015
0.3585	0.58385	0.358667	0.43585	0.358667	0.9794	0.358333	1.0458	0.3585	0.5591	0.358333	0.67195	0.358667	0.84565	0.358667	0.8045
0.366833	0.5868	0.367	0.4366	0.367	0.97915	0.366667	1.0461	0.366833	0.5597	0.366667	0.67125	0.367	0.84705	0.367	0.805
0.375167	0.58505	0.375333	0.4369	0.375333	0.98055	0.375	1.04585	0.375167	0.56055	0.375	0.6724	0.375333	0.8468	0.375333	0.80585
0.3835	0.5865	0.383667	0.4381	0.383667	0.98035	0.383333	1.0456	0.3835	0.56015	0.383333	0.6739	0.383667	0.84525	0.383667	0.80655
0.391833	0.5907	0.392	0.4375	0.392	0.9795	0.391667	1.04705	0.391833	0.5601	0.391667	0.67405	0.392	0.8469	0.392	0.80545
0.400167	0.5862	0.400333	0.4374	0.400333	0.97965	0.4	1.0465	0.400167	0.5588	0.4	0.6726	0.400333	0.84545	0.400333	0.8053
0.4085	0.58915	0.408667	0.43755	0.408667	0.98185	0.408333	1.0489	0.4085	0.55885	0.408333	0.6753	0.408667	0.84635	0.408667	0.80585
0.416833	0.5867	0.417	0.4364	0.417	0.98085	0.416667	1.0484	0.416833	0.55765	0.416667	0.6732	0.417	0.84605	0.417	0.80535
0.425167	0.5878	0.425333	0.43925	0.425333	0.9818	0.425	1.0487	0.425167	0.56085	0.425	0.6744	0.425333	0.8483	0.425333	0.8073
0.4335	0.58735	0.433667	0.4399	0.433667	0.98205	0.433333	1.04855	0.4335	0.56055	0.433333	0.67485	0.433667	0.8485	0.433667	0.8064
0.441833	0.5882	0.442	0.4399	0.442	0.9814	0.441667	1.04875	0.441833	0.5602	0.441667	0.6745	0.442	0.84855	0.442	0.8066
0.450167	0.58745	0.450333	0.43965	0.450333	0.9803	0.45	1.048	0.450167	0.559	0.45	0.6725	0.450333	0.8485	0.450333	0.8053
0.4585	0.58785	0.458667	0.44025	0.458667	0.9831	0.458333	1.04985	0.4585	0.56165	0.458333	0.6757	0.458667	0.8513	0.458667	0.807
0.466833	0.5878	0.467	0.43975	0.467	0.98455	0.466667	1.04965	0.466833	0.5607	0.466667	0.67665	0.467	0.85005	0.467	0.807
0.475167	0.5881	0.475333	0.4386	0.475333	0.9854	0.475	1.0501	0.475167	0.5621	0.475	0.67645	0.475333	0.85135	0.475333	0.8072
0.4835	0.58735	0.483667	0.4407	0.483667	0.9852	0.483333	1.0518	0.4835	0.56385	0.483333	0.67795	0.483667	0.85115	0.483667	0.8093
0.491833	0.5893	0.492	0.4423	0.492	0.98565	0.491667	1.05215	0.491833	0.5634	0.491667	0.67725	0.492	0.8518	0.492	0.81165
0.500167	0.5867	0.500333	0.4441	0.500333	0.987	0.5	1.0539	0.500167	0.5654	0.5	0.67735	0.500333	0.8535	0.500333	0.81175
0.5085	0.58735	0.508667	0.44325	0.508667	0.9878	0.508333	1.054	0.5085	0.5658	0.508333	0.6786	0.508667	0.85255	0.508667	0.81035
0.516833	0.59115	0.517	0.44415	0.517	0.9827	0.516667	1.054	0.516833	0.56685	0.516667	0.67695	0.517	0.85295	0.517	0.8116
0.525167	0.59115	0.525333	0.44435	0.525333	0.97515	0.525	1.0551	0.525167	0.56615	0.525	0.6763	0.525333	0.85325	0.525333	0.811
0.5335	0.5921	0.533667	0.44425	0.533667	1.0055	0.533333	1.0561	0.5335	0.566	0.533333	0.67855	0.533667	0.8533	0.533667	0.8127
0.541833	0.5906	0.542	0.4436	0.542	0.9941	0.541667	1.0551	0.541833	0.56535	0.541667	0.6758	0.542	0.852	0.542	0.81115
0.550167	0.5896	0.550333	0.4414	0.550333	0.98395	0.55	1.05615	0.550167	0.5652	0.55	0.6773	0.550333	0.85345	0.550333	0.8138
0.5585	0.58695	0.558667	0.443	0.558667	0.9862	0.558333	1.0568	0.5585	0.56675	0.558333	0.67715	0.558667	0.8548	0.558667	0.81545
0.566833	0.5966	0.567	0.4434	0.567	0.9851	0.566667	1.05735	0.566833	0.5665	0.566667	0.67685	0.567	0.85355	0.567	0.81365
0.575167	0.5925	0.575333	0.4439	0.575333	0.98685	0.575	1.0574	0.575167	0.56595	0.575	0.6775	0.575333	0.85395	0.575333	0.8146
0.5835	0.5932	0.583667	0.44655	0.583667	0.98695	0.583333	1.05855	0.5835	0.56635	0.583333	0.6779	0.583667	0.85495	0.583667	0.8151
0.591833	0.5935	0.592	0.44335	0.592	0.98815	0.591667	1.0592	0.591833	0.5648	0.591667	0.67765	0.592	0.85505	0.592	0.81515
0.600167	0.59455	0.600333	0.44355	0.600333	0.9899	0.6	1.05865	0.600167	0.56645	0.6	0.68015	0.600333	0.85475	0.600333	0.81535
0.6085	0.59375	0.608667	0.44325	0.608667	0.9894	0.608333	1.0594	0.6085	0.5666	0.608333	0.67915	0.608667	0.85705	0.608667	0.8154
0.616833	0.59585	0.617	0.4466	0.617	0.9894	0.616667	1.05965	0.616833	0.5669	0.616667	0.67975	0.617	0.85745	0.617	0.81565
0.625167	0.5966	0.625333	0.44595	0.625333	0.98935	0.625	1.0586	0.625167	0.5662	0.625	0.67915	0.625333	0.85685	0.625333	0.8146
0.6335	0.59695	0.633667	0.44595	0.633667	0.9901	0.633333	1.0603	0.6335	0.56675	0.633333	0.67955	0.633667	0.8578	0.633667	0.81575
0.641833	0.5949	0.642	0.44635	0.642	0.99025	0.641667	1.06065	0.641833	0.56815	0.641667	0.6804	0.642	0.8584	0.642	0.8172
0.650167	0.5939	0.650333	0.4463	0.650333	0.9915	0.65	1.0603	0.650167	0.5682	0.65	0.68165	0.650333	0.85845	0.650333	0.8156
0.6585	0.59475	0.658667	0.4454	0.658667	0.991	0.658333	1.06085	0.6585	0.5679	0.658333	0.6814	0.658667	0.8589	0.658667	0.81545
0.666833	0.5953	0.667	0.447	0.667	0.991	0.666667	1.06215	0.666833	0.56855	0.666667	0.68255	0.667	0.85565	0.667	0.8173
0.675167	0.59755	0.675333	0.44925	0.675333	0.9902	0.675	1.0617	0.675167	0.56845	0.675	0.6814	0.675333	0.85605	0.675333	0.81795
0.6835	0.59675	0.683667	0.4483	0.683667	0.9899	0.683333	1.0608	0.6835	0.56675	0.683333	0.6809	0.683667	0.8527	0.683667	0.8167
0.691833	0.5944	0.692	0.44775	0.692	0.99035	0.691667	1.0612	0.691833	0.5695	0.691667	0.68065	0.692	0.85765	0.692	0.81735
0.700167	0.59435	0.700333	0.4462	0.700333	0.99045	0.7	1.0614	0.700167	0.5683	0.7	0.68095	0.700333	0.8679	0.700333	0.8168
0.7085	0.595	0.708667	0.44635	0.708667	0.99185	0.708333	1.063	0.7085	0.5698	0.708333	0.68325	0.708667	0.86325	0.708667	0.82025
0.716833	0.59535	0.717	0.44635	0.717	0.9922	0.716667	1.0638	0.716833	0.5689	0.716667	0.6823	0.717	0.8689	0.717	0.81905
0.725167	0.59645	0.725333	0.44755	0.725333	0.9916	0.725	1.06285	0.725167	0.56945	0.725	0.6812	0.725333	0.85875	0.725333	0.8181
0.7335	0.5963	0.733667	0.44795	0.733667	0.9911	0.733333	1.06295	0.7335	0.56925	0.733333	0.6838	0.733667	0.86005	0.733667	0.8209
0.741833	0.59795	0.742	0.44845	0.742	0.99255	0.741667	1.0645	0.741833	0.56865	0.741667	0.683	0.742	0.8618	0.742	0.82175
0.750167	0.5995	0.750333	0.45005	0.750333	0.9929	0.75	1.0646	0.750167	0.56985	0.75	0.6839	0.750333	0.8606	0.750333	0.82205
0.7585	0.59725	0.758667	0.4471	0.758667	0.99295	0.758333	1.06585	0.7585	0.5711	0.758333	0.6844	0.758667	0.86215	0.758667	0.8215
0.766833	0.59885	0.767	0.448	0.767	0.9923	0.766667	1.0648	0.766833	0.5695	0.766667	0.68385	0.767	0.86305	0.767	0.821
0.775167	0.59445	0.775333	0.4482	0.775333	0.99335	0.775	1.06585	0.775167	0.56915	0.775	0.68425	0.775333	0.8629	0.775333	0.82065
0.7835	0.60065	0.783667	0.449	0.783667	0.99505	0.783333	1.0676	0.7835	0.5688	0.783333	0.68615	0.783667	0.86225	0.783667	0.8214
0.791833	0.59865	0.792	0.44775	0.792	0.9932	0.791667	1.0666	0.791833	0.568	0.791667	0.68495	0.792	0.8626	0.792	0.82045
0.800167	0.5991	0.800333	0.45025	0.800333	0.99365	0.8	1.06725	0.800167	0.5685	0.8	0.6849	0.800333	0.8626	0.800333	0.8223
0.8085	0.5972	0.808667	0.45295	0.808667	0.99395	0.808333	1.06655	0.8085	0.5687	0.808333	0.68505	0.808667	0.8616	0.808667	0.82095
0.816833	0.60565	0.817	0.44795	0.817	0.9941	0.816667	1.06635	0.816833	0.56935	0.816667	0.68605	0.817	0.8639	0.817	0.8216
0.825167	0.5862	0.825333	0.447	0.825333	0.99565	0.825	1.06725	0.825167	0.57045	0.825	0.68615	0.825333	0.8662	0.825333	0.82215
0.8335	0.6051	0.833667	0.4486	0.833667	0.99545	0.833333	1.06775	0.8335	0.56975	0.833333	0.6862	0.833667	0.8652	0.833667	0.82295
0.841833	0.6011	0.842	0.44845	0.842	0.99445	0.841667	1.06615	0.841833	0.5688	0.841667	0.6876	0.842	0.864	0.842	0.8221
0.850167	0.60015	0.850333	0.4486	0.850333	0.9956	0.85	1.06835	0.850167	0.5707	0.85	0.68815	0.850333	0.8649	0.850333	0.8235
0.8585	0.599	0.858667	0.45045	0.858667	0.99535	0.858333	1.0676	0.8585	0.5711	0.858333	0.6885	0.858667	0.86575	0.858667	0.82305
0.866833	0.60115	0.867	0.45045	0.867	0.9961	0.866667	1.06935	0.866833	0.5698	0.866667	0.6888	0.867	0.8651	0.867	0.82495
0.875167	0.60135	0.875333	0.45075	0.875333	0.99595	0.875	1.06775	0.875167	0.5715	0.875	0.6879	0.875333	0.8655	0.875333	0.8231
0.8835	0.60035	0.883667	0.4504	0.883667	0.9945	0.883333	1.06785	0.8835	0.5698	0.883333	0.6863	0.883667	0.86265	0.883667	0.82295
0.891833	0.60145	0.892	0.45105	0.892	0.9948	0.891667	1.06825	0.891833	0.5704	0.891667	0.68845	0.892	0.86455	0.892	0.8233
0.900167	0.6019	0.900333	0.45035	0.900333	0.99525	0.9	1.07095	0.900167	0.5715	0.9	0.6871	0.900333	0.86565	0.900333	0.82365
0.9085	0.6024	0.908667	0.451	0.908667	0.9936	0.908333	1.07005	0.9085	0.56985	0.908333	0.68615	0.908667	0.86285	0.908667	0.82275
0.916833	0.6045	0.917	0.45105	0.917	0.9932	0.916667	1.07005	0.916833	0.57195	0.916667	0.68765	0.917	0.86565	0.917	0.82515
0.925167	0.6038	0.925333	0.45105	0.925333	0.9917	0.925	1.07115	0.925167	0.57225	0.925	0.6882	0.925333	0.86625	0.925333	0.8253
0.9335	0.60255	0.933667	0.44995	0.933667	0.9858	0.933333	1.0703	0.9335	0.57175	0.933333	0.68905	0.933667	0.8668	0.933667	0.8252
0.941833	0.603	0.942	0.45265	0.942	0.9952	0.941667	1.07175	0.941833	0.57265	0.941667	0.6899	0.942	0.86615	0.942	0.82615
0.950167	0.6037	0.950333	0.45125	0.950333	1.00305	0.95	1.07015	0.950167	0.57225	0.95	0.6886	0.950333	0.8652	0.950333	0.82475
0.9585	0.60705	0.958667	0.45255	0.958667	0.9949	0.958333	1.07345	0.9585	0.57305	0.958333	0.68975	0.958667	0.8679	0.958667	0.82535
0.966833	0.6041	0.967	0.45275	0.967	0.99245	0.966667	1.0723	0.966833	0.57155	0.966667	0.68905	0.967	0.86655	0.967	0.8252
0.975167	0.60575	0.975333	0.45115	0.975333	0.9943	0.975	1.0722	0.975167	0.57005	0.975	0.68875	0.975333	0.8659	0.975333	0.82505
0.9835	0.607	0.983667	0.4512	0.983667	0.99395	0.983333	1.0726	0.9835	0.5713	0.983333	0.6889	0.983667	0.86625	0.983667	0.8239
0.991833	0.60895	0.992	0.4518	0.992	0.99355	0.991667	1.07265	0.991833	0.57005	0.991667	0.68685	0.992	0.8667	0.992	0.82285
1.00017	0.6082	1.00033	0.45365	1.00033	0.99435	1	1.07115	1.00017	0.5691	1	0.68645	1.00033	0.8672	1.00033	0.82275
1.0085	0.60805	1.00867	0.452	1.00867	0.9948	1.00833	1.07245	1.0085	0.57025	1.00833	0.68785	1.00867	0.8672	1.00867	0.82485
1.01683	0.60465	1.017	0.4503	1.017	0.9948	1.01667	1.0743	1.01683	0.57165	1.01667	0.6891	1.017	0.86715	1.017	0.8267
1.02517	0.60595	1.02533	0.45075	1.02533	0.9961	1.025	1.0722	1.02517	0.5691	1.025	0.689	1.02533	0.86785	1.02533	0.82485
1.0335	0.606	1.03367	0.44905	1.03367	0.9966	1.03333	1.07355	1.0335	0.57025	1.03333	0.68885	1.03367	0.8668	1.03367	0.8263
1.04183	0.60515	1.042	0.4495	1.042	0.998	1.04167	1.0747	1.04183	0.5736	1.04167	0.6903	1.042	0.86725	1.042	0.82575
1.05017	0.6036	1.05033	0.44825	1.05033	0.99615	1.05	1.0729	1.05017	0.57145	1.05	0.68905	1.05033	0.8656	1.05033	0.8265
1.0585	0.60425	1.05867	0.4536	1.05867	0.9969	1.05833	1.0743	1.0585	0.5714	1.05833	0.6887	1.05867	0.8666	1.05867	0.8271
1.06683	0.6063	1.067	0.45275	1.067	0.9964	1.06667	1.07365	1.06683	0.5716	1.06667	0.68925	1.067	0.8657	1.067	0.82675
1.07517	0.61015	1.07533	0.4531	1.07533	0.99735	1.075	1.07505	1.07517	0.5716	1.075	0.68855	1.07533	0.86715	1.07533	0.82765
1.0835	0.60565	1.08367	0.45255	1.08367	0.99735	1.08333	1.0761	1.0835	0.5728	1.08333	0.68845	1.08367	0.865	1.08367	0.8279
1.09183	0.6088	1.092	0.4522	1.092	0.9985	1.09167	1.07615	1.09183	0.57295	1.09167	0.68895	1.092	0.8657	1.092	0.82835
1.10017	0.6084	1.10033	0.45295	1.10033	0.995	1.1	1.07475	1.10017	0.57115	1.1	0.6862	1.10033	0.8621	1.10033	0.82655
1.1085	0.61025	1.10867	0.4526	1.10867	0.99685	1.10833	1.07675	1.1085	0.57385	1.10833	0.68825	1.10867	0.86205	1.10867	0.8288
1.11683	0.6074	1.117	0.4522	1.117	0.9971	1.11667	1.07655	1.11683	0.5725	1.11667	0.6888	1.117	0.8621	1.117	0.82875
1.12517	0.6059	1.12533	0.45145	1.12533	0.9964	1.125	1.07585	1.12517	0.57275	1.125	0.68825	1.12533	0.9032	1.12533	0.8284
1.1335	0.6079	1.13367	0.4526	1.13367	0.9967	1.13333	1.07545	1.1335	0.57045	1.13333	0.68845	1.13367	0.8652	1.13367	0.82775
1.14183	0.6096	1.142	0.45405	1.142	0.9959	1.14167	1.07615	1.14183	0.56985	1.14167	0.68675	1.142	0.8589	1.142	0.82665
1.15017	0.6096	1.15033	0.45445	1.15033	0.9979	1.15	1.07705	1.15017	0.5707	1.15	0.6872	1.15033	0.86325	1.15033	0.8272
1.1585	0.60785	1.15867	0.4518	1.15867	0.99925	1.15833	1.07605	1.1585	0.5707	1.15833	0.6891	1.15867	0.8649	1.15867	0.8259
1.16683	0.6072	1.167	0.4523	1.167	0.99865	1.16667	1.0766	1.16683	0.57005	1.16667	0.68865	1.167	0.8655	1.167	0.8273
1.17517	0.6096	1.17533	0.4541	1.17533	0.998	1.175	1.0767	1.17517	0.5714	1.175	0.6884	1.17533	0.86755	1.17533	0.8281
1.1835	0.61395	1.18367	0.4565	1.18367	0.99775	1.18333	1.07755	1.1835	0.5697	1.18333	0.68805	1.18367	0.86845	1.18367	0.82615
1.19183	0.60955	1.192	0.45585	1.192	0.9967	1.19167	1.07695	1.19183	0.57	1.19167	0.6888	1.192	0.8675	1.192	0.82625
1.20017	0.6088	1.20033	0.45455	1.20033	0.996	1.2	1.07695	1.20017	0.5696	1.2	0.6878	1.20033	0.86745	1.20033	0.8261
1.2085	0.6088	1.20867	0.4546	1.20867	0.9984	1.20833	1.0773	1.2085	0.57035	1.20833	0.68865	1.20867	0.86855	1.20867	0.82675
1.21683	0.60925	1.217	0.45555	1.217	1.00015	1.21667	1.07695	1.21683	0.57005	1.21667	0.6885	1.217	0.8684	1.217	0.82695
1.22517	0.6079	1.22533	0.4536	1.22533	1.0007	1.225	1.0781	1.22517	0.5713	1.225	0.69025	1.22533	0.86795	1.22533	0.8293
1.2335	0.6095	1.23367	0.45445	1.23367	0.99945	1.23333	1.07675	1.2335	0.57065	1.23333	0.68865	1.23367	0.8687	1.23367	0.8268
1.24183	0.60805	1.242	0.4531	1.242	1.0015	1.24167	1.0775	1.24183	0.57055	1.24167	0.6897	1.242	0.8695	1.242	0.82885
1.25017	0.61185	1.25033	0.4584	1.25033	1.00035	1.25	1.07645	1.25017	0.57085	1.25	0.68895	1.25033	0.8678	1.25033	0.8289
1.2585	0.61195	1.25867	0.45575	1.25867	1.00095	1.25833	1.0777	1.2585	0.57145	1.25833	0.69	1.25867	0.86685	1.25867	0.82835
1.26683	0.6109	1.267	0.4543	1.267	1.00165	1.26667	1.0774	1.26683	0.57205	1.26667	0.68995	1.267	0.8688	1.267	0.8288
1.27517	0.6116	1.27533	0.4561	1.27533	0.99915	1.275	1.0771	1.27517	0.5705	1.275	0.6901	1.27533	0.86815	1.27533	0.82865
1.2835	0.6114	1.28367	0.45455	1.28367	0.9999	1.28333	1.07675	1.2835	0.5712	1.28333	0.68795	1.28367	0.86935	1.28367	0.8282
1.29183	0.6121	1.292	0.45315	1.292	1.0001	1.29167	1.0753	1.29183	0.57035	1.29167	0.68855	1.292	0.8669	1.292	0.82735
1.30017	0.61135	1.30033	0.4527	1.30033	1.0014	1.3	1.07795	1.30017	0.5732	1.3	0.689	1.30033	0.8687	1.30033	0.82955
1.3085	0.6105	1.30867	0.45385	1.30867	1.0002	1.30833	1.07805	1.3085	0.5714	1.30833	0.68955	1.30867	0.86955	1.30867	0.82965
1.31683	0.61255	1.317	0.4541	1.317	1.00005	1.31667	1.0765	1.31683	0.57095	1.31667	0.68975	1.317	0.86725	1.317	0.82975
1.32517	0.6103	1.32533	0.4542	1.32533	1.0008	1.325	1.07765	1.32517	0.57145	1.325	0.6898	1.32533	0.8676	1.32533	0.83035
1.3335	0.6129	1.33367	0.456	1.33367	0.9992	1.33333	1.0769	1.3335	0.5714	1.33333	0.689	1.33367	0.8682	1.33367	0.82905
1.34183	0.61185	1.342	0.454	1.342	0.99995	1.34167	1.0779	1.34183	0.57185	1.34167	0.69085	1.342	0.86805	1.342	0.8296
1.35017	0.61065	1.35033	0.4522	1.35033	1.0001	1.35	1.07805	1.35017	0.5702	1.35	0.6906	1.35033	0.868	1.35033	0.82715
1.3585	0.6118	1.35867	0.4537	1.35867	0.99925	1.35833	1.07655	1.3585	0.56905	1.35833	0.6889	1.35867	0.8669	1.35867	0.8273
1.36683	0.61195	1.367	0.4549	1.367	1.0001	1.36667	1.0772	1.36683	0.5699	1.36667	0.68945	1.367	0.869	1.367	0.82765
1.37517	0.6119	1.37533	0.45335	1.37533	0.9989	1.375	1.07695	1.37517	0.56975	1.375	0.6907	1.37533	0.86795	1.37533	0.82695
1.3835	0.61	1.38367	0.453	1.38367	1.00025	1.38333	1.07575	1.3835	0.571	1.38333	0.69055	1.38367	0.86885	1.38367	0.82805
1.39183	0.60885	1.392	0.45225	1.392	1.0002	1.39167	1.07655	1.39183	0.57035	1.39167	0.6908	1.392	0.8683	1.392	0.82845
1.40017	0.611	1.40033	0.45305	1.40033	1.00195	1.4	1.07795	1.40017	0.5717	1.4	0.69335	1.40033	0.8685	1.40033	0.8297
1.4085	0.60985	1.40867	0.4531	1.40867	1.0016	1.40833	1.0761	1.4085	0.57035	1.40833	0.69145	1.40867	0.86775	1.40867	0.82855
1.41683	0.6096	1.417	0.4529	1.417	0.99885	1.41667	1.07375	1.41683	0.56965	1.41667	0.6896	1.417	0.86525	1.417	0.8262
1.42517	0.6106	1.42533	0.45435	1.42533	0.9992	1.425	1.075	1.42517	0.5712	1.425	0.69075	1.42533	0.86605	1.42533	0.82795
1.4335	0.61085	1.43367	0.4548	1.43367	0.99985	1.43333	1.07415	1.4335	0.56995	1.43333	0.6906	1.43367	0.86645	1.43367	0.82855
1.44183	0.61015	1.442	0.453	1.442	0.99835	1.44167	1.0745	1.44183	0.5706	1.44167	0.68995	1.442	0.86605	1.442	0.82785
1.45017	0.6115	1.45033	0.4535	1.45033	0.9995	1.45	1.0732	1.45017	0.5712	1.45	0.68975	1.45033	0.8661	1.45033	0.82615
1.4585	0.6095	1.45867	0.4527	1.45867	0.99835	1.45833	1.0737	1.4585	0.5701	1.45833	0.68745	1.45867	0.86485	1.45867	0.8224
1.46683	0.6079	1.467	0.4523	1.467	0.99905	1.46667	1.07425	1.46683	0.5697	1.46667	0.6894	1.467	0.86495	1.467	0.8236
1.47517	0.61025	1.47533	0.4522	1.47533	0.99655	1.475	1.07255	1.47517	0.56925	1.475	0.6869	1.47533	0.8639	1.47533	0.8283
1.4835	0.60915	1.48367	0.45295	1.48367	0.99675	1.48333	1.0727	1.4835	0.5702	1.48333	0.6884	1.48367	0.8648	1.48367	0.8298
1.49183	0.6091	1.492	0.4515	1.492	0.99725	1.49167	1.07355	1.49183	0.5719	1.49167	0.6889	1.492	0.86685	1.492	0.82805
1.50017	0.6087	1.50033	0.4522	1.50033	0.99765	1.5	1.07415	1.50017	0.57085	1.5	0.6887	1.50033	0.866	1.50033	0.82745
1.5085	0.6094	1.50867	0.4506	1.50867	0.99825	1.50833	1.0731	1.5085	0.56915	1.50833	0.6882	1.50867	0.86515	1.50867	0.82655
1.51683	0.61065	1.517	0.4527	1.517	0.99715	1.51667	1.07345	1.51683	0.56965	1.51667	0.689	1.517	0.86485	1.517	0.79555
1.52517	0.6097	1.52533	0.4522	1.52533	0.9949	1.525	1.07255	1.52517	0.5688	1.525	0.6876	1.52533	0.86435	1.52533	0.91785
1.5335	0.6114	1.53367	0.4522	1.53367	0.99625	1.53333	1.07175	1.5335	0.5684	1.53333	0.6889	1.53367	0.86465	1.53367	0.82675
1.54183	0.6118	1.542	0.4531	1.542	0.99675	1.54167	1.07345	1.54183	0.57055	1.54167	0.6887	1.542	0.8653	1.542	0.81665
1.55017	0.6105	1.55033	0.45255	1.55033	0.99605	1.55	1.07335	1.55017	0.5706	1.55	0.688	1.55033	0.8656	1.55033	0.82175
1.5585	0.61665	1.55867	0.4524	1.55867	0.9953	1.55833	1.0721	1.5585	0.56905	1.55833	0.6884	1.55867	0.8644	1.55867	0.82455
1.56683	0.6219	1.567	0.4512	1.567	0.99575	1.56667	1.071	1.56683	0.5708	1.56667	0.68865	1.567	0.8652	1.567	0.82505
1.57517	0.6247	1.57533	0.4527	1.57533	0.99535	1.575	1.0706	1.57517	0.5691	1.575	0.6891	1.57533	0.86515	1.57533	0.8259
1.5835	0.60175	1.58367	0.4515	1.58367	0.995	1.58333	1.0692	1.5835	0.56875	1.58333	0.6874	1.58367	0.86355	1.58367	0.82575
1.59183	0.60015	1.592	0.45125	1.592	0.9952	1.59167	1.0703	1.59183	0.5691	1.59167	0.687	1.592	0.8642	1.592	0.8258
1.60017	0.60355	1.60033	0.45045	1.60033	0.9945	1.6	1.06815	1.60017	0.56865	1.6	0.68765	1.60033	0.86585	1.60033	0.82415
1.6085	0.60495	1.60867	0.45175	1.60867	0.9954	1.60833	1.07	1.6085	0.5695	1.60833	0.6879	1.60867	0.87	1.60867	0.82635
1.61683	0.60605	1.617	0.4513	1.617	0.9953	1.61667	1.0694	1.61683	0.5701	1.61667	0.68695	1.617	0.871	1.617	0.82605
1.62517	0.6066	1.62533	0.4507	1.62533	0.99565	1.625	1.06935	1.62517	0.56975	1.625	0.68615	1.62533	0.86135	1.62533	0.82585
1.6335	0.6079	1.63367	0.45115	1.63367	0.99575	1.63333	1.0696	1.6335	0.56955	1.63333	0.68635	1.63367	0.8619	1.63367	0.82565
1.64183	0.60865	1.642	0.45035	1.642	0.99475	1.64167	1.0703	1.64183	0.5706	1.64167	0.68675	1.642	0.8636	1.642	0.8263
1.65017	0.60435	1.65033	0.4519	1.65033	0.99485	1.65	1.07045	1.65017	0.5709	1.65	0.68575	1.65033	0.86375	1.65033	0.82635
1.6585	0.61645	1.65867	0.44985	1.65867	0.99285	1.65833	1.0691	1.6585	0.5697	1.65833	0.68645	1.65867	0.8619	1.65867	0.82505
1.66683	0.6066	1.667	0.45015	1.667	0.9925	1.66667	1.0671	1.66683	0.56995	1.66667	0.68365	1.667	0.86165	1.667	0.8247
1.67517	0.6111	1.67533	0.4509	1.67533	0.9921	1.675	1.0689	1.67517	0.5708	1.675	0.68445	1.67533	0.8623	1.67533	0.8256
1.6835	0.60825	1.68367	0.44815	1.68367	0.99415	1.68333	1.0702	1.6835	0.5716	1.68333	0.68695	1.68367	0.86475	1.68367	0.82755
1.69183	0.6099	1.692	0.4487	1.692	0.99285	1.69167	1.06655	1.69183	0.57	1.69167	0.68475	1.692	0.8628	1.692	0.8255
1.70017	0.60955	1.70033	0.4472	1.70033	0.9916	1.7	1.0672	1.70017	0.5711	1.7	0.6847	1.70033	0.86195	1.70033	0.82665
1.7085	0.57185	1.70867	0.4475	1.70867	0.9916	1.70833	1.06845	1.7085	0.5716	1.70833	0.68465	1.70867	0.8639	1.70867	0.82665
1.71683	0.61445	1.717	0.4476	1.717	0.9905	1.71667	1.067	1.71683	0.5704	1.71667	0.68415	1.717	0.8612	1.717	0.824
1.72517	0.6078	1.72533	0.44565	1.72533	0.9896	1.725	1.0664	1.72517	0.56815	1.725	0.68405	1.72533	0.86075	1.72533	0.8229
1.7335	0.6094	1.73367	0.4478	1.73367	0.99065	1.73333	1.06605	1.7335	0.5689	1.73333	0.68385	1.73367	0.862	1.73367	0.8226
1.74183	0.60785	1.742	0.447	1.742	0.99015	1.74167	1.065	1.74183	0.569	1.74167	0.68395	1.742	0.86225	1.742	0.8221
1.75017	0.60685	1.75033	0.4449	1.75033	0.989	1.75	1.06355	1.75017	0.568	1.75	0.68375	1.75033	0.861	1.75033	0.82155
1.7585	0.60445	1.75867	0.44395	1.75867	0.98925	1.75833	1.06305	1.7585	0.56815	1.75833	0.682	1.75867	0.8607	1.75867	0.82115
1.76683	0.6059	1.767	0.44505	1.767	0.98855	1.76667	1.0636	1.76683	0.5683	1.76667	0.68525	1.767	0.86175	1.767	0.82285
1.77517	0.6062	1.77533	0.4454	1.77533	0.98915	1.775	1.063	1.77517	0.5689	1.775	0.68485	1.77533	0.86155	1.77533	0.8224
1.7835	0.6046	1.78367	0.44255	1.78367	0.98835	1.78333	1.06135	1.7835	0.5674	1.78333	0.6823	1.78367	0.8608	1.78367	0.82025
1.79183	0.6045	1.792	0.4451	1.792	0.9888	1.79167	1.0624	1.79183	0.5706	1.79167	0.68335	1.792	0.8612	1.792	0.82145
1.80017	0.60345	1.80033	0.44475	1.80033	0.98975	1.8	1.0619	1.80017	0.5696	1.8	0.68415	1.80033	0.86145	1.80033	0.82315
1.8085	0.60235	1.80867	0.4433	1.80867	0.9898	1.80833	1.06215	1.8085	0.56945	1.80833	0.6843	1.80867	0.86025	1.80867	0.82325
1.81683	0.6039	1.817	0.44415	1.817	0.9895	1.81667	1.06245	1.81683	0.5695	1.81667	0.68405	1.817	0.86245	1.817	0.8232
1.82517	0.60565	1.82533	0.44455	1.82533	0.9891	1.825	1.0617	1.82517	0.5702	1.825	0.6841	1.82533	0.86215	1.82533	0.8231
1.8335	0.6018	1.83367	0.4437	1.83367	0.98885	1.83333	1.0623	1.8335	0.5703	1.83333	0.68445	1.83367	0.8616	1.83367	0.82165
1.84183	0.607	1.842	0.44515	1.842	0.9875	1.84167	1.06245	1.84183	0.5697	1.84167	0.6817	1.842	0.8597	1.842	0.82155
1.85017	0.60495	1.85033	0.44425	1.85033	0.98735	1.85	1.06095	1.85017	0.57105	1.85	0.6825	1.85033	0.8603	1.85033	0.82105
1.8585	0.60455	1.85867	0.44275	1.85867	0.9878	1.85833	1.0605	1.8585	0.5701	1.85833	0.68305	1.85867	0.8616	1.85867	0.82195
1.86683	0.60585	1.867	0.4441	1.867	0.98635	1.86667	1.06155	1.86683	0.57095	1.86667	0.6835	1.867	0.86235	1.867	0.8227
1.87517	0.60255	1.87533	0.44155	1.87533	0.9867	1.875	1.0607	1.87517	0.5708	1.875	0.68205	1.87533	0.8622	1.87533	0.8232
1.8835	0.60285	1.88367	0.44135	1.88367	0.98675	1.88333	1.06165	1.8835	0.57145	1.88333	0.68205	1.88367	0.86075	1.88367	0.8222
1.89183	0.6042	1.892	0.44135	1.892	0.98645	1.89167	1.0614	1.89183	0.57025	1.89167	0.6813	1.892	0.86135	1.892	0.8225
1.90017	0.59935	1.90033	0.4406	1.90033	0.9867	1.9	1.06105	1.90017	0.57105	1.9	0.68165	1.90033	0.8605	1.90033	0.8218
1.9085	0.60555	1.90867	0.4398	1.90867	0.98485	1.90833	1.058	1.9085	0.5689	1.90833	0.6811	1.90867	0.8583	1.90867	0.81945
1.91683	0.6032	1.917	0.4407	1.917	0.9839	1.91667	1.05775	1.91683	0.56765	1.91667	0.6813	1.917	0.85885	1.917	0.8196
1.92517	0.60295	1.92533	0.44055	1.92533	0.984	1.925	1.05845	1.92517	0.56885	1.925	0.6797	1.92533	0.85855	1.92533	0.8182
1.9335	0.60235	1.93367	0.44005	1.93367	0.98595	1.93333	1.0582	1.9335	0.5701	1.93333	0.6818	1.93367	0.861	1.93367	0.82055
1.94183	0.60155	1.942	0.4388	1.942	0.9855	1.94167	1.05685	1.94183	0.5701	1.94167	0.68	1.942	0.85995	1.942	0.81945
1.95017	0.60125	1.95033	0.43845	1.95033	0.98525	1.95	1.0578	1.95017	0.5696	1.95	0.68155	1.95033	0.8605	1.95033	0.82085
1.9585	0.60065	1.95867	0.43895	1.95867	0.9848	1.95833	1.05575	1.9585	0.5688	1.95833	0.6787	1.95867	0.85835	1.95867	0.81845
1.96683	0.6009	1.967	0.43725	1.967	0.98655	1.96667	1.0557	1.96683	0.5698	1.96667	0.68055	1.967	0.85995	1.967	0.8177
1.97517	0.5982	1.97533	0.43835	1.97533	0.98805	1.975	1.05665	1.97517	0.56995	1.975	0.6822	1.97533	0.8594	1.97533	0.8193
1.9835	0.60075	1.98367	0.43895	1.98367	0.9867	1.98333	1.0555	1.9835	0.57185	1.98333	0.68095	1.98367	0.85835	1.98367	0.8189
1.99183	0.6002	1.992	0.43845	1.992	0.987	1.99167	1.05635	1.99183	0.5714	1.99167	0.6811	1.992	0.8597	1.992	0.82135
2.00017	0.59965	2.00033	0.4388	2.00033	0.9855	2	1.05455	2.00017	0.56975	2	0.67965	2.00033	0.8584	2.00033	0.819
2.0085	0.6017	2.00867	0.43865	2.00867	0.9846	2.00833	1.05505	2.0085	0.57085	2.00833	0.6796	2.00867	0.85755	2.00867	0.82
2.01683	0.602	2.017	0.4377	2.017	0.98225	2.01667	1.0534	2.01683	0.56925	2.01667	0.67865	2.017	0.8566	2.017	0.81805
2.02517	0.6002	2.02533	0.43775	2.02533	0.9848	2.025	1.05345	2.02517	0.5709	2.025	0.6801	2.02533	0.8568	2.02533	0.81885
2.0335	0.60005	2.03367	0.4359	2.03367	0.9837	2.03333	1.05205	2.0335	0.57025	2.03333	0.67775	2.03367	0.85605	2.03367	0.8182
2.04183	0.59815	2.042	0.43435	2.042	0.98145	2.04167	1.04945	2.04183	0.5693	2.04167	0.67605	2.042	0.8539	2.042	0.81715
2.05017	0.59945	2.05033	0.4358	2.05033	0.98205	2.05	1.05095	2.05017	0.57105	2.05	0.67665	2.05033	0.8555	2.05033	0.8192
2.0585	0.59835	2.05867	0.4311	2.05867	0.98155	2.05833	1.049	2.0585	0.5694	2.05833	0.6763	2.05867	0.8551	2.05867	0.81865
2.06683	0.59555	2.067	0.4253	2.067	0.9764	2.06667	1.04235	2.06683	0.56395	2.06667	0.6703	2.067	0.85015	2.067	0.815
2.07517	0.58475	2.07533	0.40535	2.07533	0.96025	2.075	1.02405	2.07517	0.5489	2.075	0.6556	2.07533	0.8359	2.07533	0.80135
2.0835	0.55485	2.08367	0.3799	2.08367	0.9248	2.08333	0.9846	2.0835	0.51355	2.08333	0.6229	2.08367	0.8064	2.08367	0.77025
2.09183	0.50505	2.092	0.3531	2.092	0.872	2.09167	0.92425	2.09183	0.4621	2.09167	0.5747	2.092	0.75685	2.092	0.71835
2.10017	0.44345	2.10033	0.33305	2.10033	0.80985	2.1	0.8578	2.10017	0.40275	2.1	0.5268	2.10033	0.70145	2.10033	0.6604
2.1085	0.39465	2.10867	0.32035	2.10867	0.7618	2.10833	0.80335	2.1085	0.3491	2.10833	0.488	2.10867	0.6544	2.10867	0.6219
2.11683	0.38015	2.117	0.3189	2.117	0.74425	2.11667	0.7834	2.11683	0.3178	2.11667	0.47765	2.117	0.63485	2.117	0.6295
2.12517	0.40685	2.12533	0.31365	2.12533	0.77265	2.125	0.80775	2.12517	0.32085	2.125	0.50235	2.12533	0.6507	2.12533	0.69265
2.1335	0.4716	2.13367	0.3157	2.13367	0.84365	2.13333	0.87985	2.1335	0.36635	2.13333	0.55755	2.13367	0.70425	2.13367	0.80625
2.14183	0.54905	2.142	0.3336	2.142	0.9502	2.14167	1.0027	2.14183	0.4665	2.14167	0.63795	2.142	0.78695	2.142	0.94975
2.15017	0.6334	2.15033	0.4079	2.15033	1.08475	2.15	1.17445	2.15017	0.62035	2.15	0.7482	2.15033	0.8918	2.15033	1.10295
2.1585	0.73345	2.15867	0.5588	2.15867	1.24745	2.15833	1.3968	2.1585	0.83415	2.15833	0.8917	2.15867	1.0241	2.15867	1.2627
2.16683	0.86855	2.167	0.78685	2.167	1.4407	2.16667	1.65725	2.16683	1.08915	2.16667	1.07065	2.167	1.18225	2.167	1.43695
2.17517	1.0495	2.17533	1.0713	2.17533	1.69665	2.175	1.93355	2.17517	1.3765	2.175	1.27675	2.17533	1.3647	2.17533	1.6633
2.1835	1.3052	2.18367	1.3956	2.18367	2.1936	2.18333	2.2277	2.1835	1.7366	2.18333	1.49995	2.18367	1.5723	2.18367	2.1256
2.19183	1.70085	2.192	1.76755	2.192	3.3919	2.19167	2.57685	2.19183	2.2697	2.19167	1.73905	2.192	1.82225	2.192	3.3708
2.20017	2.35365	2.20033	2.20675	2.20033	6.0528	2.2	3.0484	2.20017	3.12795	2.2	2.0116	2.20033	2.1535	2.20033	6.3982
2.2085	3.3605	2.20867	2.7244	2.20867	10.9024	2.20833	3.7085	2.2085	4.4259	2.20833	2.3341	2.20867	2.61075	2.20867	12.3071
2.21683	4.73995	2.217	3.29845	2.217	18.1341	2.21667	4.5712	2.21683	6.1603	2.21667	2.70905	2.217	3.21375	2.217	21.5733
2.22517	6.3783	2.22533	3.88105	2.22533	27.1077	2.225	5.5732	2.22517	8.1781	2.225	3.1256	2.22533	3.9328	2.22533	33.4666
2.2335	8.0774	2.23367	4.4084	2.23367	36.5329	2.23333	6.5926	2.2335	10.2332	2.23333	3.5616	2.23367	4.69475	2.23367	46.2615
2.24183	9.6165	2.242	4.824	2.242	45.0189	2.24167	7.4939	2.24183	12.0547	2.24167	3.9943	2.242	5.41135	2.242	58.0108
2.25017	10.7986	2.25033	5.1004	2.25033	51.5283	2.25	8.16285	2.25017	13.4265	2.25	4.40465	2.25033	5.9958	2.25033	67.1952
2.2585	11.5085	2.25867	5.22965	2.25867	55.5852	2.25833	8.5471	2.2585	14.2476	2.25833	4.78105	2.25867	6.39555	2.25867	73.0871
2.26683	11.7264	2.267	5.2246	2.267	57.1885	2.26667	8.6413	2.26683	14.5151	2.26667	5.1084	2.267	6.5947	2.267	75.6425
2.27517	11.5136	2.27533	5.11635	2.27533	56.6463	2.275	8.4839	2.27517	14.3036	2.275	5.3708	2.27533	6.60895	2.27533	75.2704
2.2835	10.974	2.28367	4.9336	2.28367	54.431	2.28333	8.13585	2.2835	13.7261	2.28333	5.5536	2.28367	6.47415	2.28367	72.5857
2.29183	10.2253	2.292	4.70685	2.292	51.0464	2.29167	7.6668	2.29183	12.9011	2.29167	5.64645	2.292	6.23135	2.292	68.2489
2.30017	9.3646	2.30033	4.4614	2.30033	46.9354	2.3	7.1395	2.30017	11.9381	2.3	5.65335	2.30033	5.92335	2.30033	62.8687
2.3085	8.47675	2.30867	4.2126	2.30867	42.4855	2.30833	6.59965	2.3085	10.922	2.30833	5.57715	2.30867	5.5808	2.30867	56.9558
2.31683	7.6143	2.317	3.9715	2.317	37.9916	2.31667	6.08105	2.31683	9.91485	2.31667	5.4331	2.317	5.2266	2.317	50.9104
2.32517	6.8177	2.32533	3.7469	2.32533	33.6405	2.325	5.6063	2.32517	8.95875	2.325	5.2395	2.32533	4.88695	2.32533	45.0246
2.3335	6.1027	2.33367	3.54465	2.33367	29.5624	2.33333	5.1856	2.3335	8.0774	2.33333	5.01535	2.33367	4.56775	2.33367	39.493
2.34183	5.47865	2.342	3.36405	2.342	25.8624	2.34167	4.8197	2.34183	7.28665	2.34167	4.77525	2.342	4.2792	2.342	34.435
2.35017	4.9437	2.35033	3.20685	2.35033	22.5404	2.35	4.5088	2.35017	6.59025	2.35	4.53275	2.35033	4.0239	2.35033	29.9093
2.3585	4.49075	2.35867	3.0733	2.35867	19.6183	2.35833	4.2455	2.3585	5.9854	2.35833	4.29615	2.35867	3.80075	2.35867	25.9335
2.36683	4.1101	2.367	2.9538	2.367	17.0883	2.36667	4.0247	2.36683	5.46495	2.36667	4.0755	2.367	3.6068	2.367	22.4933
2.37517	3.7953	2.37533	2.85365	2.37533	14.9247	2.375	3.8394	2.37517	5.02385	2.375	3.8777	2.37533	3.4402	2.37533	19.5474
2.3835	3.53385	2.38367	2.7669	2.38367	13.0971	2.38333	3.6818	2.3835	4.6611	2.38333	3.71105	2.38367	3.2985	2.38367	17.0532
2.39183	3.31555	2.392	2.695	2.392	11.5517	2.39167	3.5507	2.39183	4.3638	2.39167	3.57535	2.392	3.1757	2.392	14.9628
2.40017	3.1286	2.40033	2.6325	2.40033	10.2644	2.4	3.43705	2.40017	4.12215	2.4	3.4737	2.40033	3.0707	2.40033	13.2089
2.4085	2.97365	2.40867	2.58075	2.40867	9.17335	2.40833	3.33975	2.4085	3.93045	2.40833	3.39705	2.40867	2.97795	2.40867	11.7386
2.41683	2.84265	2.417	2.53355	2.417	8.2734	2.41667	3.25565	2.41683	3.77395	2.41667	3.3406	2.417	2.9008	2.417	10.5092
2.42517	2.73155	2.42533	2.49395	2.42533	7.50665	2.425	3.1832	2.42517	3.6439	2.425	3.2965	2.42533	2.83305	2.42533	9.47875
2.4335	2.63455	2.43367	2.46035	2.43367	6.86345	2.43333	3.1192	2.4335	3.532	2.43333	3.2547	2.43367	2.77305	2.43367	8.60965
2.44183	2.5554	2.442	2.43225	2.442	6.3328	2.44167	3.06495	2.44183	3.4344	2.44167	3.2124	2.442	2.72365	2.442	7.88075
2.45017	2.4845	2.45033	2.40615	2.45033	5.8884	2.45	3.0179	2.45017	3.3497	2.45	3.1675	2.45033	2.6783	2.45033	7.26955
2.4585	2.4301	2.45867	2.3855	2.45867	5.51365	2.45833	2.9737	2.4585	3.2742	2.45833	3.121	2.45867	2.6411	2.45867	6.7532
2.46683	2.37955	2.467	2.3633	2.467	5.20085	2.46667	2.9367	2.46683	3.21395	2.46667	3.08335	2.467	2.6071	2.467	6.3196
2.47517	2.33455	2.47533	2.3426	2.47533	4.9372	2.475	2.9015	2.47517	3.172	2.475	3.06095	2.47533	2.5763	2.47533	5.95065
2.4835	2.2996	2.48367	2.3212	2.48367	4.70855	2.48333	2.86865	2.4835	3.1501	2.48333	3.0617	2.48367	2.5487	2.48367	5.633
2.49183	2.26595	2.492	2.30255	2.492	4.51345	2.49167	2.8379	2.49183	3.14535	2.49167	3.086	2.492	2.5233	2.492	5.35795
2.50017	2.2364	2.50033	2.28205	2.50033	4.342	2.5	2.8065	2.50017	3.1512	2.5	3.1316	2.50033	2.49445	2.50033	5.11355
2.5085	2.2059	2.50867	2.25585	2.50867	4.1896	2.50833	2.77445	2.5085	3.159	2.50833	3.18185	2.50867	2.4685	2.50867	4.8959
2.51683	2.1785	2.517	2.2306	2.517	4.0513	2.51667	2.7438	2.51683	3.15825	2.51667	3.22645	2.517	2.4433	2.517	4.6996
2.52517	2.1487	2.52533	2.2029	2.52533	3.92385	2.525	2.7135	2.52517	3.145	2.525	3.25375	2.52533	2.41895	2.52533	4.5216
2.5335	2.1188	2.53367	2.1748	2.53367	3.806	2.53333	2.68185	2.5335	3.1141	2.53333	3.2533	2.53367	2.39685	2.53367	4.35605
2.54183	2.09075	2.542	2.14855	2.542	3.698	2.54167	2.6565	2.54183	3.07195	2.54167	3.22935	2.542	2.38075	2.542	4.2116
2.55017	2.06365	2.55033	2.1214	2.55033	3.59285	2.55	2.6264	2.55017	3.01275	2.55	3.179	2.55033	2.36325	2.55033	4.07485
2.5585	2.0315	2.55867	2.0921	2.55867	3.49255	2.55833	2.59575	2.5585	2.9408	2.55833	3.1102	2.55867	2.34435	2.55867	3.94655
2.56683	2.0009	2.567	2.06125	2.567	3.39545	2.56667	2.56495	2.56683	2.86285	2.56667	3.03135	2.567	2.326	2.567	3.821
2.57517	1.9676	2.57533	2.02945	2.57533	3.3035	2.575	2.5342	2.57517	2.784	2.575	2.9451	2.57533	2.3079	2.57533	3.7052
2.5835	1.9343	2.58367	1.9962	2.58367	3.21225	2.58333	2.49945	2.5835	2.7041	2.58333	2.8571	2.58367	2.28045	2.58367	3.58835
2.59183	1.9003	2.592	1.96535	2.592	3.12595	2.59167	2.4689	2.59183	2.6242	2.59167	2.77075	2.592	2.2532	2.592	3.47615
2.60017	1.86755	2.60033	1.93345	2.60033	3.0397	2.6	2.4333	2.60017	2.5462	2.6	2.6845	2.60033	2.21965	2.60033	3.3644
2.6085	1.83475	2.60867	1.90185	2.60867	2.95955	2.60833	2.3995	2.6085	2.47165	2.60833	2.60155	2.60867	2.18755	2.60867	3.25605
2.61683	1.80265	2.617	1.8703	2.617	2.8803	2.61667	2.3642	2.61683	2.3979	2.61667	2.5203	2.617	2.15205	2.617	3.1515
2.62517	1.7698	2.62533	1.83865	2.62533	2.80645	2.625	2.3311	2.62517	2.3299	2.625	2.4471	2.62533	2.11765	2.62533	3.05155
2.6335	1.74	2.63367	1.80865	2.63367	2.73465	2.63333	2.2964	2.6335	2.26475	2.63333	2.3745	2.63367	2.08085	2.63367	2.95505
2.64183	1.71035	2.642	1.7797	2.642	2.6673	2.64167	2.26415	2.64183	2.20465	2.64167	2.30795	2.642	2.0457	2.642	2.86415
2.65017	1.68445	2.65033	1.75115	2.65033	2.6037	2.65	2.23385	2.65017	2.14835	2.65	2.24595	2.65033	2.0116	2.65033	2.7774
2.6585	1.65395	2.65867	1.72235	2.65867	2.5466	2.65833	2.20365	2.6585	2.09635	2.65833	2.1903	2.65867	1.9782	2.65867	2.6972
2.66683	1.63245	2.667	1.696	2.667	2.48935	2.66667	2.1729	2.66683	2.0488	2.66667	2.1375	2.667	1.9475	2.667	2.621
2.67517	1.6013	2.67533	1.6732	2.67533	2.4367	2.675	2.1462	2.67517	2.0078	2.675	2.08865	2.67533	1.91955	2.67533	2.5508
2.6835	1.5838	2.68367	1.6521	2.68367	2.3898	2.68333	2.1198	2.6835	1.97055	2.68333	2.0434	2.68367	1.89335	2.68367	2.48565
2.69183	1.5597	2.692	1.63045	2.692	2.3447	2.69167	2.0945	2.69183	1.93795	2.69167	2.0043	2.692	1.87025	2.692	2.42505
2.70017	1.54205	2.70033	1.6111	2.70033	2.304	2.7	2.06915	2.70017	1.9065	2.7	1.96785	2.70033	1.84965	2.70033	2.36905
2.7085	1.5199	2.70867	1.5937	2.70867	2.2678	2.70833	2.04725	2.7085	1.8773	2.70833	1.9365	2.70867	1.8303	2.70867	2.3187
2.71683	1.50705	2.717	1.57995	2.717	2.23585	2.71667	2.0265	2.71683	1.8539	2.71667	1.90895	2.717	1.81725	2.717	2.27445
2.72517	1.4964	2.72533	1.57055	2.72533	2.2055	2.725	2.0066	2.72517	1.82965	2.725	1.8842	2.72533	1.8026	2.72533	2.2303
2.7335	1.47795	2.73367	1.5659	2.73367	2.17965	2.73333	1.9932	2.7335	1.8101	2.73333	1.8621	2.73367	1.79195	2.73367	2.1927
2.74183	1.46985	2.742	1.5672	2.742	2.1631	2.74167	1.98635	2.74183	1.79935	2.74167	1.85105	2.742	1.78835	2.742	2.16465
2.75017	1.46815	2.75033	1.5807	2.75033	2.15225	2.75	1.9885	2.75017	1.797	2.75	1.8466	2.75033	1.7879	2.75033	2.14295
2.7585	1.4652	2.75867	1.6055	2.75867	2.15205	2.75833	2.00315	2.7585	1.80625	2.75833	1.85285	2.75867	1.79675	2.75867	2.1302
2.76683	1.46455	2.767	1.64285	2.767	2.16125	2.76667	2.031	2.76683	1.8283	2.76667	1.8707	2.767	1.81225	2.767	2.1292
2.77517	1.47305	2.77533	1.6925	2.77533	2.18335	2.775	2.07045	2.77517	1.86165	2.775	1.8987	2.77533	1.83685	2.77533	2.13935
2.7835	1.4922	2.78367	1.75355	2.78367	2.21525	2.78333	2.1222	2.7835	1.9071	2.78333	1.93685	2.78367	1.86955	2.78367	2.15915
2.79183	1.503	2.792	1.82175	2.792	2.2534	2.79167	2.17685	2.79183	1.95945	2.79167	1.97985	2.792	1.90735	2.792	2.1859
2.80017	1.53655	2.80033	1.89595	2.80033	2.29885	2.8	2.2393	2.80017	2.00935	2.8	2.0283	2.80033	1.95145	2.80033	2.21995
2.8085	1.5777	2.80867	1.96165	2.80867	2.3445	2.80833	2.30075	2.8085	2.00585	2.80833	2.0773	2.80867	1.99295	2.80867	2.2556
2.81683	1.5862	2.817	2.02585	2.817	2.3922	2.81667	2.3601	2.81683	2.1566	2.81667	2.1242	2.817	2.03625	2.817	2.29105
2.82517	1.60325	2.82533	2.0805	2.82533	2.43485	2.825	2.41195	2.82517	2.23805	2.825	2.16975	2.82533	2.0747	2.82533	2.3252
2.8335	1.62025	2.83367	2.1288	2.83367	2.4703	2.83333	2.4549	2.8335	2.20925	2.83333	2.20555	2.83367	2.10815	2.83367	2.3547
2.84183	1.62825	2.842	2.16665	2.842	2.5023	2.84167	2.49025	2.84183	2.23025	2.84167	2.23635	2.842	2.13505	2.842	2.3767
2.85017	1.64215	2.85033	2.2001	2.85033	2.526	2.85	2.515	2.85017	2.2573	2.85	2.2609	2.85033	2.15525	2.85033	2.3921
2.8585	1.6443	2.85867	2.2204	2.85867	2.5451	2.85833	2.5351	2.8585	2.28025	2.85833	2.27945	2.85867	2.1749	2.85867	2.4052
2.86683	1.6484	2.867	2.23995	2.867	2.55745	2.86667	2.54635	2.86683	2.2938	2.86667	2.29325	2.867	2.18845	2.867	2.4113
2.87517	1.6501	2.87533	2.25025	2.87533	2.56695	2.875	2.55095	2.87517	2.3013	2.875	2.3042	2.87533	2.19755	2.87533	2.413
2.8835	1.6433	2.88367	2.25045	2.88367	2.5737	2.88333	2.5532	2.8835	2.3048	2.88333	2.3113	2.88367	2.20335	2.88367	2.4131
2.89183	1.6372	2.892	2.2454	2.892	2.57435	2.89167	2.548	2.89183	2.30135	2.89167	2.31275	2.892	2.20555	2.892	2.4072
2.90017	1.62745	2.90033	2.23835	2.90033	2.576	2.9	2.543	2.90017	2.29695	2.9	2.3162	2.90033	2.2074	2.90033	2.40025
2.9085	1.61555	2.90867	2.22575	2.90867	2.58545	2.90833	2.54365	2.9085	2.29655	2.90833	2.3297	2.90867	2.21465	2.90867	2.3949
2.91683	1.60015	2.917	2.21255	2.917	2.60805	2.91667	2.55175	2.91683	2.3022	2.91667	2.35465	2.917	2.2332	2.917	2.3978
2.92517	1.58325	2.92533	2.20485	2.92533	2.6497	2.925	2.5719	2.92517	2.3181	2.925	2.39985	2.92533	2.26695	2.92533	2.41105
2.9335	1.56545	2.93367	2.1992	2.93367	2.7154	2.93333	2.6063	2.9335	2.34235	2.93333	2.4681	2.93367	2.3189	2.93367	2.4438
2.94183	1.54635	2.942	2.19465	2.942	2.80035	2.94167	2.6484	2.94183	2.37485	2.94167	2.55085	2.942	2.3828	2.942	2.48855
2.95017	1.5279	2.95033	2.19425	2.95033	2.8966	2.95	2.69245	2.95017	2.4095	2.95	2.6432	2.95033	2.45615	2.95033	2.5451
2.9585	1.5106	2.95867	2.1991	2.95867	2.9877	2.95833	2.7328	2.9585	2.4405	2.95833	2.72725	2.95867	2.5236	2.95867	2.60165
2.96683	1.49345	2.967	2.2087	2.967	3.06455	2.96667	2.762	2.96683	2.4625	2.96667	2.79405	2.967	2.5776	2.967	2.651
2.97517	1.4748	2.97533	2.2201	2.97533	3.12085	2.975	2.7805	2.97517	2.4757	2.975	2.83595	2.97533	2.6129	2.97533	2.68635
2.9835	1.45565	2.98367	2.2393	2.98367	3.1557	2.98333	2.78895	2.9835	2.48425	2.98333	2.85625	2.98367	2.631	2.98367	2.7056
2.99183	1.4422	2.992	2.26465	2.992	3.17355	2.99167	2.79495	2.99183	2.49025	2.99167	2.85915	2.992	2.635	2.992	2.71315
3.00017	1.42885	3.00033	2.2977	3.00033	3.1761	3	2.79565	3.00017	2.48955	3	2.84465	3.00033	2.62705	3.00033	2.7068
3.0085	1.41525	3.00867	2.3281	3.00867	3.17065	3.00833	2.79655	3.0085	2.4929	3.00833	2.82375	3.00867	2.61	3.00867	2.6932
3.01683	1.40315	3.017	2.3612	3.017	3.15715	3.01667	2.7933	3.01683	2.4897	3.01667	2.79465	3.017	2.5879	3.017	2.6737
3.02517	1.3932	3.02533	2.3867	3.02533	3.14095	3.025	2.78925	3.02517	2.48515	3.025	2.7633	3.02533	2.56355	3.02533	2.65145
3.0335	1.38095	3.03367	2.40295	3.03367	3.1185	3.03333	2.7792	3.0335	2.47475	3.03333	2.7286	3.03367	2.53565	3.03367	2.62565
3.04183	1.3692	3.042	2.409	3.042	3.094	3.04167	2.7665	3.04183	2.4621	3.04167	2.69355	3.042	2.50895	3.042	2.59975
3.05017	1.358	3.05033	2.4072	3.05033	3.06375	3.05	2.7474	3.05017	2.4426	3.05	2.65555	3.05033	2.4794	3.05033	2.5707
3.0585	1.3456	3.05867	2.3966	3.05867	3.0304	3.05833	2.7248	3.0585	2.42075	3.05833	2.61725	3.05867	2.4496	3.05867	2.5409
3.06683	1.33175	3.067	2.3773	3.067	2.9965	3.06667	2.69895	3.06683	2.3948	3.06667	2.58025	3.067	2.4204	3.067	2.50855
3.07517	1.31615	3.07533	2.35135	3.07533	2.96055	3.075	2.67165	3.07517	2.3668	3.075	2.54445	3.07533	2.39165	3.07533	2.4771
3.0835	1.30315	3.08367	2.32615	3.08367	2.92585	3.08333	2.6456	3.0835	2.3371	3.08333	2.5125	3.08367	2.3665	3.08367	2.4479
3.09183	1.29065	3.092	2.29975	3.092	2.8946	3.09167	2.6164	3.09183	2.31125	3.09167	2.4823	3.092	2.3411	3.092	2.4199
3.10017	1.27785	3.10033	2.2722	3.10033	2.86095	3.1	2.5893	3.10017	2.28145	3.1	2.4512	3.10033	2.31585	3.10033	2.3917
3.1085	1.26195	3.10867	2.2434	3.10867	2.829	3.10833	2.5619	3.1085	2.25325	3.10833	2.4209	3.10867	2.29035	3.10867	2.3652
3.11683	1.25355	3.117	2.2169	3.117	2.8002	3.11667	2.53545	3.11683	2.22815	3.11667	2.39475	3.117	2.26795	3.117	2.3439
3.12517	1.2413	3.12533	2.1888	3.12533	2.76885	3.125	2.5079	3.12517	2.20065	3.125	2.36725	3.12533	2.2447	3.12533	2.3183
3.1335	1.2322	3.13367	2.16405	3.13367	2.73755	3.13333	2.4823	3.1335	2.1732	3.13333	2.3399	3.13367	2.221	3.13367	2.2926
3.14183	1.2204	3.142	2.13625	3.142	2.70845	3.14167	2.4576	3.14183	2.1481	3.14167	2.31365	3.142	2.1992	3.142	2.2675
3.15017	1.2103	3.15033	2.11075	3.15033	2.6788	3.15	2.43565	3.15017	2.1239	3.15	2.2881	3.15033	2.1767	3.15033	2.23205
3.1585	1.1992	3.15867	2.0844	3.15867	2.65125	3.15833	2.42015	3.1585	2.10045	3.15833	2.26445	3.15867	2.15625	3.15867	2.1696
3.16683	1.19045	3.167	2.0628	3.167	2.62365	3.16667	2.412	3.16683	2.07905	3.16667	2.2408	3.167	2.13555	3.167	2.24805
3.17517	1.17955	3.17533	2.0388	3.17533	2.5994	3.175	2.4212	3.17517	2.0603	3.175	2.2203	3.17533	2.11745	3.17533	2.27625
3.1835	1.1717	3.18367	2.01845	3.18367	2.57685	3.18333	2.44915	3.1835	2.04145	3.18333	2.19795	3.18367	2.09945	3.18367	2.22745
3.19183	1.162	3.192	1.99795	3.192	2.5552	3.19167	2.50055	3.19183	2.02565	3.19167	2.1791	3.192	2.0812	3.192	2.2834
3.20017	1.15505	3.20033	1.9792	3.20033	2.5371	3.2	2.57235	3.20017	2.01275	3.2	2.15945	3.20033	2.06365	3.20033	2.39235
3.2085	1.14675	3.20867	1.95955	3.20867	2.51595	3.20833	2.65475	3.2085	1.99945	3.20833	2.1406	3.20867	2.0475	3.20867	2.53955
3.21683	1.1392	3.217	1.9409	3.217	2.4993	3.21667	2.738	3.21683	1.98785	3.21667	2.12245	3.217	2.0321	3.217	2.71035
3.22517	1.13165	3.22533	1.92395	3.22533	2.4844	3.225	2.80475	3.22517	1.97475	3.225	2.10595	3.22533	2.0167	3.22533	2.88085
3.2335	1.1235	3.23367	1.9047	3.23367	2.4692	3.23333	2.8486	3.2335	1.96305	3.23333	2.0896	3.23367	2.00315	3.23367	3.02515
3.24183	1.1175	3.242	1.89175	3.242	2.4527	3.24167	2.8621	3.24183	1.9484	3.24167	2.07335	3.242	1.98865	3.242	3.1232
3.25017	1.1098	3.25033	1.87095	3.25033	2.43365	3.25	2.84555	3.25017	1.9326	3.25	2.05495	3.25033	1.97325	3.25033	3.16435
3.2585	1.1027	3.25867	1.8517	3.25867	2.4146	3.25833	2.8084	3.2585	1.91455	3.25833	2.0367	3.25867	1.9588	3.25867	3.15655
3.26683	1.0951	3.267	1.8326	3.267	2.3928	3.26667	2.7545	3.26683	1.8965	3.26667	2.0156	3.267	1.94185	3.267	3.1048
3.27517	1.0882	3.27533	1.8148	3.27533	2.37195	3.275	2.69215	3.27517	1.8786	3.275	1.99685	3.27533	1.92455	3.27533	3.02405
3.2835	1.0787	3.28367	1.79625	3.28367	2.34905	3.28333	2.6255	3.2835	1.85785	3.28333	1.97535	3.28367	1.90655	3.28367	2.926
3.29183	1.06855	3.292	1.7769	3.292	2.32645	3.29167	2.5593	3.29183	1.8404	3.29167	1.9567	3.292	1.8872	3.292	2.8192
3.30017	1.06105	3.30033	1.7597	3.30033	2.3039	3.3	2.49355	3.30017	1.82185	3.3	1.93675	3.30033	1.8694	3.30033	2.7106
3.3085	1.0563	3.30867	1.74295	3.30867	2.2842	3.30833	2.43355	3.3085	1.8023	3.30833	1.91705	3.30867	1.8526	3.30867	2.60605
3.31683	1.0496	3.317	1.7263	3.317	2.2618	3.31667	2.37565	3.31683	1.7829	3.31667	1.89925	3.317	1.8365	3.317	2.50515
3.32517	1.0439	3.32533	1.71415	3.32533	2.24405	3.325	2.32595	3.32517	1.7689	3.325	1.88325	3.32533	1.8232	3.32533	2.41355
3.3335	1.037	3.33367	1.7022	3.33367	2.2268	3.33333	2.28125	3.3335	1.7581	3.33333	1.8688	3.33367	1.81255	3.33367	2.3297
3.34183	1.0321	3.342	1.69065	3.342	2.2096	3.34167	2.2439	3.34183	1.74445	3.34167	1.85415	3.342	1.80185	3.342	2.25445
3.35017	1.02805	3.35033	1.68325	3.35033	2.1948	3.35	2.2094	3.35017	1.73745	3.35	1.842	3.35033	1.79275	3.35033	2.18715
3.3585	1.0268	3.35867	1.6777	3.35867	2.1811	3.35833	2.181	3.3585	1.7345	3.35833	1.83235	3.35867	1.78895	3.35867	2.1301
3.36683	1.02435	3.367	1.67245	3.367	2.1694	3.36667	2.15425	3.36683	1.7292	3.36667	1.82225	3.367	1.7869	3.367	2.0819
3.37517	1.0228	3.37533	1.66665	3.37533	2.159	3.375	2.136	3.37517	1.72895	3.375	1.8132	3.37533	1.7844	3.37533	2.0389
3.3835	1.02375	3.38367	1.6633	3.38367	2.1478	3.38333	2.1432	3.3835	1.7281	3.38333	1.8044	3.38367	1.7839	3.38367	2.002
3.39183	1.0244	3.392	1.65825	3.392	2.13765	3.39167	2.1068	3.39183	1.72645	3.39167	1.79515	3.392	1.7826	3.392	1.9706
3.40017	1.0249	3.40033	1.65415	3.40033	2.1247	3.4	2.08935	3.40017	1.7239	3.4	1.78565	3.40033	1.7817	3.40033	1.9417
3.4085	1.0246	3.40867	1.6471	3.40867	2.1156	3.40833	2.07675	3.4085	1.7217	3.40833	1.7777	3.40867	1.78065	3.40867	1.9175
3.41683	1.022	3.417	1.64075	3.417	2.10495	3.41667	2.06425	3.41683	1.717	3.41667	1.7685	3.417	1.7782	3.417	1.8968
3.42517	1.0229	3.42533	1.63435	3.42533	2.09015	3.425	2.04995	3.42517	1.70955	3.425	1.7573	3.42533	1.77415	3.42533	1.87275
3.4335	1.0189	3.43367	1.62735	3.43367	2.0807	3.43333	2.03985	3.4335	1.7028	3.43333	1.7491	3.43367	1.7714	3.43367	1.8543
3.44183	1.017	3.442	1.6181	3.442	2.06695	3.44167	2.0236	3.44183	1.6917	3.44167	1.73725	3.442	1.76365	3.442	1.8329
3.45017	1.0144	3.45033	1.6092	3.45033	2.0557	3.45	2.0124	3.45017	1.68535	3.45	1.72885	3.45033	1.7572	3.45033	1.8144
3.4585	1.00985	3.45867	1.59895	3.45867	2.04215	3.45833	1.9983	3.4585	1.67415	3.45833	1.71825	3.45867	1.74955	3.45867	1.79335
3.46683	1.00685	3.467	1.5892	3.467	2.0307	3.46667	1.9865	3.46683	1.66445	3.46667	1.70895	3.467	1.74255	3.467	1.7743
3.47517	1.0024	3.47533	1.58205	3.47533	2.0197	3.475	1.97445	3.47517	1.65595	3.475	1.69995	3.47533	1.7344	3.47533	1.75685
3.4835	1.0009	3.48367	1.57405	3.48367	2.00935	3.48333	1.96365	3.4835	1.64815	3.48333	1.6913	3.48367	1.7276	3.48367	1.7404
3.49183	0.99605	3.492	1.56645	3.492	1.99875	3.49167	1.95415	3.49183	1.64045	3.49167	1.68255	3.492	1.7209	3.492	1.7245
3.50017	0.9914	3.50033	1.5565	3.50033	1.9877	3.5	1.94445	3.50017	1.6302	3.5	1.67435	3.50033	1.71285	3.50033	1.7098
3.5085	0.9884	3.50867	1.54955	3.50867	1.97575	3.50833	1.9334	3.5085	1.62065	3.50833	1.6643	3.50867	1.7037	3.50867	1.6933
3.51683	0.98635	3.517	1.54025	3.517	1.9659	3.51667	1.9244	3.51683	1.61355	3.51667	1.6568	3.517	1.696	3.517	1.6792
3.52517	0.98135	3.52533	1.53115	3.52533	1.9543	3.525	1.9168	3.52517	1.6067	3.525	1.64835	3.52533	1.68885	3.52533	1.6671
3.5335	0.97985	3.53367	1.5222	3.53367	1.944	3.53333	1.91	3.5335	1.59755	3.53333	1.64	3.53367	1.6801	3.53367	1.65305
3.54183	0.9771	3.542	1.5142	3.542	1.93125	3.54167	1.8992	3.54183	1.58975	3.54167	1.63	3.542	1.6716	3.542	1.6405
3.55017	0.97475	3.55033	1.50575	3.55033	1.92355	3.55	1.8942	3.55017	1.58455	3.55	1.62495	3.55033	1.66725	3.55033	1.6313
3.5585	0.97015	3.55867	1.49665	3.55867	1.91185	3.55833	1.88655	3.5585	1.5766	3.55833	1.61555	3.55867	1.6598	3.55867	1.61855
3.56683	0.9682	3.567	1.49045	3.567	1.9036	3.56667	1.882	3.56683	1.5725	3.56667	1.60935	3.567	1.6538	3.567	1.609
3.57517	0.9643	3.57533	1.4818	3.57533	1.89635	3.575	1.87445	3.57517	1.5641	3.575	1.60215	3.57533	1.6473	3.57533	1.5988
3.5835	0.9616	3.58367	1.47445	3.58367	1.8876	3.58333	1.86935	3.5835	1.55865	3.58333	1.5968	3.58367	1.64225	3.58367	1.5886
3.59183	0.95985	3.592	1.46845	3.592	1.8784	3.59167	1.863	3.59183	1.5536	3.59167	1.5901	3.592	1.6357	3.592	1.57865
3.60017	0.96	3.60033	1.46055	3.60033	1.87115	3.6	1.85555	3.60017	1.54755	3.6	1.5855	3.60033	1.63155	3.60033	1.57045
3.6085	0.9582	3.60867	1.45545	3.60867	1.86155	3.60833	1.8471	3.6085	1.5409	3.60833	1.57645	3.60867	1.6262	3.60867	1.56165
3.61683	0.958	3.617	1.45	3.617	1.85455	3.61667	1.8391	3.61683	1.5344	3.61667	1.5703	3.617	1.6208	3.617	1.55505
3.62517	0.9582	3.62533	1.4434	3.62533	1.84505	3.625	1.8288	3.62517	1.52865	3.625	1.563	3.62533	1.6146	3.62533	1.54685
3.6335	0.9545	3.63367	1.4331	3.63367	1.83895	3.63333	1.82015	3.6335	1.523	3.63333	1.55655	3.63367	1.6076	3.63367	1.5392
3.64183	0.95265	3.642	1.42585	3.642	1.8296	3.64167	1.8096	3.64183	1.5146	3.64167	1.54895	3.642	1.60055	3.642	1.53115
3.65017	0.95005	3.65033	1.4172	3.65033	1.8211	3.65	1.8005	3.65017	1.507	3.65	1.5399	3.65033	1.5923	3.65033	1.5219
3.6585	0.94775	3.65867	1.4094	3.65867	1.81255	3.65833	1.79015	3.6585	1.5017	3.65833	1.5348	3.65867	1.58705	3.65867	1.5128
3.66683	0.94305	3.667	1.4004	3.667	1.8026	3.66667	1.78015	3.66683	1.4939	3.66667	1.52665	3.667	1.57865	3.667	1.50405
3.67517	0.9391	3.67533	1.393	3.67533	1.7934	3.675	1.77	3.67517	1.48915	3.675	1.519	3.67533	1.5717	3.67533	1.49575
3.6835	0.9351	3.68367	1.38715	3.68367	1.78435	3.68333	1.76075	3.6835	1.48035	3.68333	1.51305	3.68367	1.56455	3.68367	1.48765
3.69183	0.93245	3.692	1.3789	3.692	1.77715	3.69167	1.7533	3.69183	1.4763	3.69167	1.50705	3.692	1.56085	3.692	1.48
3.70017	0.92795	3.70033	1.37155	3.70033	1.76845	3.7	1.74465	3.70017	1.4718	3.7	1.5012	3.70033	1.55565	3.70033	1.4722
3.7085	0.92375	3.70867	1.3646	3.70867	1.76075	3.70833	1.73715	3.7085	1.46575	3.70833	1.4948	3.70867	1.5492	3.70867	1.4637
3.71683	0.91875	3.717	1.3572	3.717	1.7528	3.71667	1.7313	3.71683	1.46275	3.71667	1.4889	3.717	1.5446	3.717	1.45815
3.72517	0.9178	3.72533	1.353	3.72533	1.74475	3.725	1.7238	3.72517	1.45805	3.725	1.48355	3.72533	1.53795	3.72533	1.44985
3.7335	0.9152	3.73367	1.3495	3.73367	1.7388	3.73333	1.71715	3.7335	1.45445	3.73333	1.4783	3.73367	1.53455	3.73367	1.44565
3.74183	0.9128	3.742	1.3453	3.742	1.7353	3.74167	1.7126	3.74183	1.45175	3.74167	1.4763	3.742	1.53305	3.742	1.4415
3.75017	0.9106	3.75033	1.34045	3.75033	1.72885	3.75	1.70815	3.75017	1.448	3.75	1.4724	3.75033	1.5286	3.75033	1.43695
3.7585	0.9095	3.75867	1.33805	3.75867	1.727	3.75833	1.7035	3.7585	1.4456	3.75833	1.4685	3.75867	1.52645	3.75867	1.43375
3.76683	0.9107	3.767	1.33475	3.767	1.7224	3.76667	1.6985	3.76683	1.44215	3.76667	1.46425	3.767	1.52175	3.767	1.43095
3.77517	0.90955	3.77533	1.32995	3.77533	1.71725	3.775	1.69375	3.77517	1.43655	3.775	1.46115	3.77533	1.51705	3.77533	1.42665
3.7835	0.90915	3.78367	1.3261	3.78367	1.71195	3.78333	1.6882	3.7835	1.4335	3.78333	1.4577	3.78367	1.51265	3.78367	1.42365
3.79183	0.9061	3.792	1.32045	3.792	1.70655	3.79167	1.6819	3.79183	1.4294	3.79167	1.4531	3.792	1.50935	3.792	1.4191
3.80017	0.90725	3.80033	1.31605	3.80033	1.6998	3.8	1.6762	3.80017	1.4251	3.8	1.4483	3.80033	1.50395	3.80033	1.4126
3.8085	0.9049	3.80867	1.31195	3.80867	1.69445	3.80833	1.66925	3.8085	1.42245	3.80833	1.4447	3.80867	1.50015	3.80867	1.40925
3.81683	0.90315	3.817	1.3075	3.817	1.69045	3.81667	1.6662	3.81683	1.4188	3.81667	1.4439	3.817	1.4964	3.817	1.40505
3.82517	0.90135	3.82533	1.30395	3.82533	1.6853	3.825	1.6606	3.82517	1.4164	3.825	1.44265	3.82533	1.49395	3.82533	1.40085
3.8335	0.89675	3.83367	1.2974	3.83367	1.68045	3.83333	1.6543	3.8335	1.4123	3.83333	1.4399	3.83367	1.4882	3.83367	1.3964
3.84183	0.8925	3.842	1.2929	3.842	1.67725	3.84167	1.65	3.84183	1.4089	3.84167	1.43945	3.842	1.4866	3.842	1.39255
3.85017	0.8916	3.85033	1.2889	3.85033	1.6708	3.85	1.6462	3.85017	1.4065	3.85	1.43825	3.85033	1.48065	3.85033	1.3879
3.8585	0.8894	3.85867	1.2875	3.85867	1.668	3.85833	1.64165	3.8585	1.4047	3.85833	1.43585	3.85867	1.4772	3.85867	1.3858
3.86683	0.88705	3.867	1.28345	3.867	1.66515	3.86667	1.63775	3.86683	1.40195	3.86667	1.4343	3.867	1.4747	3.867	1.3815
3.87517	0.88525	3.87533	1.2807	3.87533	1.6606	3.875	1.63425	3.87517	1.3988	3.875	1.4312	3.87533	1.4693	3.87533	1.37845
3.8835	0.8832	3.88367	1.27845	3.88367	1.6574	3.88333	1.63135	3.8835	1.39675	3.88333	1.4283	3.88367	1.45725	3.88367	1.37435
3.89183	0.883	3.892	1.2751	3.892	1.6565	3.89167	1.6297	3.89183	1.39665	3.89167	1.4274	3.892	1.4212	3.892	1.37205
3.90017	0.88255	3.90033	1.2738	3.90033	1.6524	3.9	1.6252	3.90017	1.39205	3.9	1.4216	3.90033	1.50695	3.90033	1.36775
3.9085	0.8831	3.90867	1.27225	3.90867	1.64915	3.90833	1.6247	3.9085	1.3917	3.90833	1.4183	3.90867	1.5724	3.90867	1.3646
3.91683	0.8833	3.917	1.2679	3.917	1.64715	3.91667	1.6219	3.91683	1.3886	3.91667	1.41495	3.917	1.48065	3.917	1.36235
3.92517	0.88135	3.92533	1.2662	3.92533	1.6447	3.925	1.61795	3.92517	1.3861	3.925	1.4118	3.92533	1.45875	3.92533	1.36005
3.9335	0.88185	3.93367	1.2625	3.93367	1.64015	3.93333	1.61525	3.9335	1.38175	3.93333	1.4075	3.93367	1.4492	3.93367	1.35725
3.94183	0.88065	3.942	1.2595	3.942	1.6387	3.94167	1.613	3.94183	1.38025	3.94167	1.4047	3.942	1.4469	3.942	1.35495
3.95017	0.88085	3.95033	1.2567	3.95033	1.6342	3.95	1.60845	3.95017	1.37485	3.95	1.39945	3.95033	1.4433	3.95033	1.349
3.9585	0.87785	3.95867	1.25205	3.95867	1.63205	3.95833	1.60655	3.9585	1.37145	3.95833	1.3952	3.95867	1.44375	3.95867	1.3452
3.96683	0.8759	3.967	1.2488	3.967	1.6275	3.96667	1.60505	3.96683	1.36755	3.96667	1.39065	3.967	1.44175	3.967	1.34005
3.97517	0.87435	3.97533	1.2454	3.97533	1.62185	3.975	1.59975	3.97517	1.36285	3.975	1.386	3.97533	1.4362	3.97533	1.3346
3.9835	0.87175	3.98367	1.24365	3.98367	1.6193	3.98333	1.59815	3.9835	1.36125	3.98333	1.38315	3.98367	1.43535	3.98367	1.3316
3.99183	0.8711	3.992	1.2412	3.992	1.61565	3.99167	1.59555	3.99183	1.35915	3.99167	1.37995	3.992	1.43395	3.992	1.3287
4.00017	0.86875	4.00033	1.23855	4.00033	1.61265	4	1.59475	4.00017	1.35585	4	1.3767	4.00033	1.4311	4.00033	1.3259
4.0085	0.8643	4.00867	1.23425	4.00867	1.6088	4.00833	1.5931	4.0085	1.35255	4.00833	1.37265	4.00867	1.42755	4.00867	1.3215
4.01683	0.8622	4.017	1.2306	4.017	1.6056	4.01667	1.5815	4.01683	1.3499	4.01667	1.3683	4.017	1.4244	4.017	1.31785
4.02517	0.862	4.02533	1.22855	4.02533	1.60045	4.025	1.569	4.02517	1.34605	4.025	1.36465	4.02533	1.41965	4.02533	1.3119
4.0335	0.85715	4.03367	1.2255	4.03367	1.60035	4.03333	1.5824	4.0335	1.3443	4.03333	1.3642	4.03367	1.41925	4.03367	1.31065
4.04183	0.85775	4.042	1.22275	4.042	1.59745	4.04167	1.57875	4.04183	1.34265	4.04167	1.3609	4.042	1.4163	4.042	1.3072
4.05017	0.85355	4.05033	1.22065	4.05033	1.5952	4.05	1.57325	4.05017	1.3409	4.05	1.35745	4.05033	1.4144	4.05033	1.3047
4.0585	0.85495	4.05867	1.2188	4.05867	1.5903	4.05833	1.56815	4.0585	1.336	4.05833	1.35305	4.05867	1.41	4.05867	1.301
4.06683	0.85115	4.067	1.2158	4.067	1.587	4.06667	1.56435	4.06683	1.3347	4.06667	1.3493	4.067	1.408	4.067	1.29725
4.07517	0.8492	4.07533	1.21195	4.07533	1.5834	4.075	1.55995	4.07517	1.3305	4.075	1.3441	4.07533	1.404	4.07533	1.2924
4.0835	0.8473	4.08367	1.2092	4.08367	1.5821	4.08333	1.55755	4.0835	1.32935	4.08333	1.3423	4.08367	1.4025	4.08367	1.29105
4.09183	0.8448	4.092	1.2062	4.092	1.5785	4.09167	1.5531	4.09183	1.3259	4.09167	1.3376	4.092	1.4004	4.092	1.2882
4.10017	0.8404	4.10033	1.20085	4.10033	1.5738	4.1	1.54775	4.10017	1.3222	4.1	1.32965	4.10033	1.39555	4.10033	1.28355
4.1085	0.84065	4.10867	1.1969	4.10867	1.57195	4.10833	1.54395	4.1085	1.3202	4.10833	1.32745	4.10867	1.3932	4.10867	1.28235
4.11683	0.83715	4.117	1.1949	4.117	1.5699	4.11667	1.5407	4.11683	1.31745	4.11667	1.32315	4.117	1.3915	4.117	1.28105
4.12517	0.8359	4.12533	1.19515	4.12533	1.5668	4.125	1.5376	4.12517	1.31315	4.125	1.317	4.12533	1.3892	4.12533	1.27825
4.1335	0.8327	4.13367	1.18995	4.13367	1.5655	4.13333	1.53325	4.1335	1.3108	4.13333	1.31275	4.13367	1.3858	4.13367	1.27545
4.14183	0.8308	4.142	1.18655	4.142	1.5636	4.14167	1.52975	4.14183	1.30755	4.14167	1.30625	4.142	1.38325	4.142	1.27215
4.15017	0.83055	4.15033	1.1856	4.15033	1.56035	4.15	1.5278	4.15017	1.30335	4.15	1.29835	4.15033	1.38085	4.15033	1.267
4.1585	0.82725	4.15867	1.1841	4.15867	1.55615	4.15833	1.52285	4.1585	1.3032	4.15833	1.29475	4.15867	1.3776	4.15867	1.26035
4.16683	0.8259	4.167	1.17995	4.167	1.5553	4.16667	1.52075	4.16683	1.30215	4.16667	1.2924	4.167	1.37605	4.167	1.2529
4.17517	0.8261	4.17533	1.17885	4.17533	1.55265	4.175	1.52095	4.17517	1.30305	4.175	1.2923	4.17533	1.37825	4.17533	1.24665
4.1835	0.82255	4.18367	1.1756	4.18367	1.5506	4.18333	1.51885	4.1835	1.30355	4.18333	1.2941	4.18367	1.37645	4.18367	1.23865
4.19183	0.8235	4.192	1.174	4.192	1.5498	4.19167	1.51855	4.19183	1.3037	4.19167	1.29695	4.192	1.3755	4.192	1.2328
4.20017	0.82105	4.20033	1.17285	4.20033	1.54745	4.2	1.5164	4.20017	1.3041	4.2	1.3014	4.20033	1.3745	4.20033	1.22975
4.2085	0.8187	4.20867	1.1723	4.20867	1.549	4.20833	1.5182	4.2085	1.3048	4.20833	1.3073	4.20867	1.37515	4.20867	1.2301
4.21683	0.81675	4.217	1.1718	4.217	1.5498	4.21667	1.5183	4.21683	1.30575	4.21667	1.31335	4.217	1.37435	4.217	1.2337
4.22517	0.81395	4.22533	1.16995	4.22533	1.5514	4.225	1.51715	4.22517	1.3065	4.225	1.3174	4.22533	1.37415	4.22533	1.2402
4.2335	0.8138	4.23367	1.17195	4.23367	1.55245	4.23333	1.5182	4.2335	1.30725	4.23333	1.3209	4.23367	1.37375	4.23367	1.2476
4.24183	0.81445	4.242	1.1729	4.242	1.553	4.24167	1.51975	4.24183	1.3068	4.24167	1.32165	4.242	1.37335	4.242	1.2569
4.25017	0.8134	4.25033	1.17295	4.25033	1.5518	4.25	1.5175	4.25017	1.3038	4.25	1.3241	4.25033	1.3703	4.25033	1.2619
4.2585	0.8136	4.25867	1.1742	4.25867	1.55295	4.25833	1.51745	4.2585	1.30385	4.25833	1.32295	4.25867	1.37085	4.25867	1.26635
4.26683	0.8138	4.267	1.1732	4.267	1.5552	4.26667	1.5196	4.26683	1.304	4.26667	1.32305	4.267	1.37105	4.267	1.27325
4.27517	0.8129	4.27533	1.17275	4.27533	1.55365	4.275	1.518	4.27517	1.3032	4.275	1.32125	4.27533	1.3696	4.27533	1.2769
4.2835	0.81425	4.28367	1.17255	4.28367	1.55395	4.28333	1.5186	4.2835	1.30345	4.28333	1.32	4.28367	1.3672	4.28367	1.2793
4.29183	0.81565	4.292	1.1733	4.292	1.55215	4.29167	1.5154	4.29183	1.3052	4.29167	1.31755	4.292	1.36775	4.292	1.27815
4.30017	0.8165	4.30033	1.17545	4.30033	1.5539	4.3	1.51545	4.30017	1.30615	4.3	1.31815	4.30033	1.36975	4.30033	1.2808
4.3085	0.8175	4.30867	1.1769	4.30867	1.55495	4.30833	1.51785	4.3085	1.30645	4.30833	1.31765	4.30867	1.3708	4.30867	1.28225
4.31683	0.8173	4.317	1.1763	4.317	1.55535	4.31667	1.51695	4.31683	1.30815	4.31667	1.31675	4.317	1.37085	4.317	1.2802
4.32517	0.81785	4.32533	1.17915	4.32533	1.55605	4.325	1.5168	4.32517	1.3087	4.325	1.3163	4.32533	1.37095	4.32533	1.2803
4.3335	0.817	4.33367	1.181	4.33367	1.5566	4.33333	1.51855	4.3335	1.3087	4.33333	1.3162	4.33367	1.371	4.33367	1.28095
4.34183	0.81715	4.342	1.18085	4.342	1.5551	4.34167	1.5159	4.34183	1.30705	4.34167	1.3136	4.342	1.36835	4.342	1.2765
4.35017	0.81725	4.35033	1.18	4.35033	1.5549	4.35	1.5156	4.35017	1.30575	4.35	1.3119	4.35033	1.367	4.35033	1.27415
4.3585	0.8156	4.35867	1.17695	4.35867	1.55345	4.35833	1.51445	4.3585	1.30435	4.35833	1.3099	4.35867	1.3677	4.35867	1.273
4.36683	0.81545	4.367	1.17555	4.367	1.5523	4.36667	1.51315	4.36683	1.30135	4.36667	1.30655	4.367	1.36535	4.367	1.2698
4.37517	0.8147	4.37533	1.1723	4.37533	1.5508	4.375	1.51395	4.37517	1.29905	4.375	1.3048	4.37533	1.36375	4.37533	1.26595
4.3835	0.81085	4.38367	1.16735	4.38367	1.5484	4.38333	1.51235	4.3835	1.2964	4.38333	1.30445	4.38367	1.3617	4.38367	1.2636
4.39183	0.80875	4.392	1.16495	4.392	1.5459	4.39167	1.5114	4.39183	1.29265	4.39167	1.30195	4.392	1.35915	4.392	1.25965
4.40017	0.8057	4.40033	1.16035	4.40033	1.5452	4.4	1.5107	4.40017	1.2914	4.4	1.30055	4.40033	1.3573	4.40033	1.25685
4.4085	0.8047	4.40867	1.1574	4.40867	1.54545	4.40833	1.51275	4.4085	1.2921	4.40833	1.29975	4.40867	1.3586	4.40867	1.25385
4.41683	0.8017	4.417	1.15705	4.417	1.5462	4.41667	1.5138	4.41683	1.29155	4.41667	1.2986	4.417	1.3566	4.417	1.24935
4.42517	0.7985	4.42533	1.15735	4.42533	1.5466	4.425	1.5148	4.42517	1.29335	4.425	1.2984	4.42533	1.3586	4.42533	1.2484
4.4335	0.79855	4.43367	1.16055	4.43367	1.5494	4.43333	1.5166	4.4335	1.29565	4.43333	1.29815	4.43367	1.35965	4.43367	1.2483
4.44183	0.7967	4.442	1.16435	4.442	1.5504	4.44167	1.51795	4.44183	1.29735	4.44167	1.29835	4.442	1.36075	4.442	1.24545
4.45017	0.79565	4.45033	1.1688	4.45033	1.5528	4.45	1.5188	4.45017	1.3007	4.45	1.2981	4.45033	1.3623	4.45033	1.24495
4.4585	0.7955	4.45867	1.17425	4.45867	1.55555	4.45833	1.5169	4.4585	1.30195	4.45833	1.29725	4.45867	1.3613	4.45867	1.2438
4.46683	0.79665	4.467	1.17905	4.467	1.55825	4.46667	1.5176	4.46683	1.3032	4.46667	1.29785	4.467	1.36215	4.467	1.2442
4.47517	0.7975	4.47533	1.1821	4.47533	1.56015	4.475	1.51675	4.47517	1.30495	4.475	1.2964	4.47533	1.36105	4.47533	1.24385
4.4835	0.7977	4.48367	1.18325	4.48367	1.55945	4.48333	1.5124	4.4835	1.3027	4.48333	1.29445	4.48367	1.36115	4.48367	1.24265
4.49183	0.79765	4.492	1.1863	4.492	1.5619	4.49167	1.5112	4.49183	1.30255	4.49167	1.29345	4.492	1.36135	4.492	1.2446
4.50017	0.79575	4.50033	1.1846	4.50033	1.5605	4.5	1.5084	4.50017	1.3019	4.5	1.29285	4.50033	1.3597	4.50033	1.2438
4.5085	0.7918	4.50867	1.17995	4.50867	1.55945	4.50833	1.50455	4.5085	1.2977	4.50833	1.29055	4.50867	1.35715	4.50867	1.2411
4.51683	0.7894	4.517	1.1767	4.517	1.5579	4.51667	1.5009	4.51683	1.29645	4.51667	1.28755	4.517	1.3536	4.517	1.2378
4.52517	0.78775	4.52533	1.1747	4.52533	1.55525	4.525	1.4977	4.52517	1.2937	4.525	1.28605	4.52533	1.35205	4.52533	1.2349
4.5335	0.78715	4.53367	1.17085	4.53367	1.5544	4.53333	1.4951	4.5335	1.29135	4.53333	1.2833	4.53367	1.3506	4.53367	1.23205
4.54183	0.7843	4.542	1.16505	4.542	1.55275	4.54167	1.4909	4.54183	1.28895	4.54167	1.28075	4.542	1.3488	4.542	1.2313
4.55017	0.7821	4.55033	1.16165	4.55033	1.54925	4.55	1.4868	4.55017	1.2852	4.55	1.2771	4.55033	1.3445	4.55033	1.2266
4.5585	0.7802	4.55867	1.1578	4.55867	1.54905	4.55833	1.48675	4.5585	1.28625	4.55833	1.27765	4.55867	1.34675	4.55867	1.22705
4.56683	0.7778	4.567	1.15545	4.567	1.5481	4.56667	1.48445	4.56683	1.28465	4.56667	1.2765	4.567	1.34375	4.567	1.2264
4.57517	0.77685	4.57533	1.1497	4.57533	1.5476	4.575	1.48185	4.57517	1.2836	4.575	1.27505	4.57533	1.3433	4.57533	1.2251
4.5835	0.7741	4.58367	1.14665	4.58367	1.5477	4.58333	1.4807	4.5835	1.2818	4.58333	1.27425	4.58367	1.3418	4.58367	1.2242
4.59183	0.7725	4.592	1.1436	4.592	1.54835	4.59167	1.4793	4.59183	1.2819	4.59167	1.27405	4.592	1.34295	4.592	1.2249
4.60017	0.772	4.60033	1.14195	4.60033	1.5473	4.6	1.4777	4.60017	1.2786	4.6	1.2724	4.60033	1.3402	4.60033	1.2226
4.6085	0.7692	4.60867	1.1408	4.60867	1.54715	4.60833	1.47545	4.6085	1.2804	4.60833	1.2715	4.60867	1.33975	4.60867	1.2231
4.61683	0.7679	4.617	1.13855	4.617	1.5475	4.61667	1.47495	4.61683	1.2784	4.61667	1.2709	4.617	1.3391	4.617	1.2239
4.62517	0.76655	4.62533	1.13695	4.62533	1.54625	4.625	1.4753	4.62517	1.2776	4.625	1.26965	4.62533	1.33895	4.62533	1.22315
4.6335	0.7667	4.63367	1.1361	4.63367	1.54785	4.63333	1.4751	4.6335	1.27705	4.63333	1.2707	4.63367	1.33945	4.63367	1.2226
4.64183	0.76605	4.642	1.13485	4.642	1.5471	4.64167	1.4739	4.64183	1.27685	4.64167	1.27055	4.642	1.3374	4.642	1.22255
4.65017	0.7652	4.65033	1.135	4.65033	1.54605	4.65	1.4733	4.65017	1.2764	4.65	1.26925	4.65033	1.3382	4.65033	1.2201
4.6585	0.7627	4.65867	1.133	4.65867	1.54445	4.65833	1.4723	4.6585	1.27655	4.65833	1.2678	4.65867	1.3354	4.65867	1.21775
4.66683	0.7627	4.667	1.1324	4.667	1.54535	4.66667	1.47015	4.66683	1.2771	4.66667	1.2686	4.667	1.33535	4.667	1.2187
4.67517	0.76165	4.67533	1.13055	4.67533	1.547	4.675	1.4716	4.67517	1.2797	4.675	1.2684	4.67533	1.3351	4.67533	1.21905
4.6835	0.7597	4.68367	1.1312	4.68367	1.54915	4.68333	1.47525	4.6835	1.2811	4.68333	1.2703	4.68367	1.3384	4.68367	1.22155
4.69183	0.7585	4.692	1.1301	4.692	1.5492	4.69167	1.47645	4.69183	1.2825	4.69167	1.2704	4.692	1.3375	4.692	1.22025
4.70017	0.75915	4.70033	1.131	4.70033	1.5495	4.7	1.48045	4.70017	1.28425	4.7	1.2701	4.70033	1.3369	4.70033	1.219
4.7085	0.757	4.70867	1.13095	4.70867	1.55105	4.70833	1.4851	4.7085	1.28625	4.70833	1.27175	4.70867	1.33815	4.70867	1.221
4.71683	0.7575	4.717	1.1308	4.717	1.5512	4.71667	1.49115	4.71683	1.28845	4.71667	1.2713	4.717	1.3362	4.717	1.22025
4.72517	0.75685	4.72533	1.1301	4.72533	1.55265	4.725	1.49815	4.72517	1.28795	4.725	1.2725	4.72533	1.33665	4.72533	1.21915
4.7335	0.75545	4.73367	1.1303	4.73367	1.55355	4.73333	1.5056	4.7335	1.29185	4.73333	1.2742	4.73367	1.3395	4.73367	1.22085
4.74183	0.7539	4.742	1.1306	4.742	1.5537	4.74167	1.5122	4.74183	1.2912	4.74167	1.27315	4.742	1.3393	4.742	1.22195
4.75017	0.75525	4.75033	1.133	4.75033	1.55175	4.75	1.51985	4.75017	1.2909	4.75	1.2741	4.75033	1.3401	4.75033	1.2243
4.7585	0.753	4.75867	1.13055	4.75867	1.55465	4.75833	1.5233	4.7585	1.29025	4.75833	1.27485	4.75867	1.34015	4.75867	1.22405
4.76683	0.75105	4.767	1.1293	4.767	1.55745	4.76667	1.5249	4.76683	1.2907	4.76667	1.2747	4.767	1.341	4.767	1.2273
4.77517	0.7515	4.77533	1.1305	4.77533	1.55955	4.775	1.52765	4.77517	1.2893	4.775	1.27465	4.77533	1.34	4.77533	1.22935
4.7835	0.75175	4.78367	1.12945	4.78367	1.56135	4.78333	1.5265	4.7835	1.28805	4.78333	1.2763	4.78367	1.34155	4.78367	1.23035
4.79183	0.75165	4.792	1.13025	4.792	1.5623	4.79167	1.5239	4.79183	1.28765	4.79167	1.27605	4.792	1.34095	4.792	1.2308
4.80017	0.75125	4.80033	1.1294	4.80033	1.56305	4.8	1.52315	4.80017	1.2868	4.8	1.27455	4.80033	1.33985	4.80033	1.2314
4.8085	0.7494	4.80867	1.12855	4.80867	1.56455	4.80833	1.5215	4.8085	1.28785	4.80833	1.27615	4.80867	1.34185	4.80867	1.2324
4.81683	0.7475	4.817	1.1272	4.817	1.56265	4.81667	1.519	4.81683	1.28565	4.81667	1.2751	4.817	1.34065	4.817	1.23085
4.82517	0.7477	4.82533	1.1267	4.82533	1.5651	4.825	1.51775	4.82517	1.28625	4.825	1.2754	4.82533	1.34055	4.82533	1.23095
4.8335	0.7477	4.83367	1.1267	4.83367	1.566	4.83333	1.5169	4.8335	1.2857	4.83333	1.2753	4.83367	1.3416	4.83367	1.2309
4.84183	0.74765	4.842	1.12725	4.842	1.5689	4.84167	1.51735	4.84183	1.2868	4.84167	1.2768	4.842	1.34375	4.842	1.23145
4.85017	0.74535	4.85033	1.12575	4.85033	1.56965	4.85	1.51785	4.85017	1.2888	4.85	1.2759	4.85033	1.34265	4.85033	1.2311
4.8585	0.74715	4.85867	1.12785	4.85867	1.5727	4.85833	1.5199	4.8585	1.2921	4.85833	1.27885	4.85867	1.3455	4.85867	1.23365
4.86683	0.74435	4.867	1.127	4.867	1.5748	4.86667	1.5228	4.86683	1.2948	4.86667	1.2798	4.867	1.34735	4.867	1.23565
4.87517	0.74455	4.87533	1.12635	4.87533	1.5753	4.875	1.5244	4.87517	1.29845	4.875	1.28045	4.87533	1.3489	4.87533	1.23825
4.8835	0.7441	4.88367	1.12735	4.88367	1.5793	4.88333	1.52895	4.8835	1.3021	4.88333	1.28185	4.88367	1.3506	4.88367	1.2404
4.89183	0.7438	4.892	1.1284	4.892	1.58145	4.89167	1.53225	4.89183	1.30795	4.89167	1.28245	4.892	1.3546	4.892	1.2437
4.90017	0.74205	4.90033	1.12775	4.90033	1.5822	4.9	1.5336	4.90017	1.31275	4.9	1.2841	4.90033	1.3556	4.90033	1.2461
4.9085	0.74165	4.90867	1.12875	4.90867	1.58405	4.90833	1.53395	4.9085	1.3152	4.90833	1.28445	4.90867	1.35685	4.90867	1.2482
4.91683	0.7417	4.917	1.12885	4.917	1.58725	4.91667	1.53585	4.91683	1.31875	4.91667	1.28675	4.917	1.35855	4.917	1.24975
4.92517	0.7424	4.92533	1.1312	4.92533	1.5894	4.925	1.5316	4.92517	1.3212	4.925	1.2874	4.92533	1.36185	4.92533	1.2541
4.9335	0.7426	4.93367	1.1319	4.93367	1.5925	4.93333	1.53655	4.9335	1.32475	4.93333	1.28955	4.93367	1.36445	4.93367	1.2566
4.94183	0.74305	4.942	1.13305	4.942	1.59405	4.94167	1.5337	4.94183	1.3252	4.94167	1.29135	4.942	1.3665	4.942	1.2578
4.95017	0.74255	4.95033	1.13305	4.95033	1.59645	4.95	1.5379	4.95017	1.32345	4.95	1.2918	4.95033	1.3667	4.95033	1.2572
4.9585	0.7452	4.95867	1.13555	4.95867	1.6005	4.95833	1.538	4.9585	1.3249	4.95833	1.2954	4.95867	1.36905	4.95867	1.25805
4.96683	0.74335	4.967	1.13585	4.967	1.60375	4.96667	1.5379	4.96683	1.3243	4.96667	1.29875	4.967	1.36925	4.967	1.25935
4.97517	0.74325	4.97533	1.1361	4.97533	1.60525	4.975	1.53405	4.97517	1.32275	4.975	1.2996	4.97533	1.3705	4.97533	1.2601
4.9835	0.7425	4.98367	1.1384	4.98367	1.60765	4.98333	1.5325	4.9835	1.3221	4.98333	1.3009	4.98367	1.36995	4.98367	1.2606
4.99183	0.74445	4.992	1.1403	4.992	1.61105	4.99167	1.54305	4.99183	1.32215	4.99167	1.30395	4.992	1.3716	4.992	1.26225
5.00017	0.7439	5.00033	1.1413	5.00033	1.6135	5	1.5324	5.00017	1.3226	5	1.30675	5.00033	1.37355	5.00033	1.2638
5.0085	0.744	5.00867	1.14495	5.00867	1.61375	5.00833	1.53405	5.0085	1.31965	5.00833	1.3059	5.00867	1.3723	5.00867	1.2608
5.01683	0.74025	5.017	1.1422	5.017	1.61605	5.01667	1.5338	5.01683	1.32205	5.01667	1.3077	5.017	1.3737	5.017	1.2624
5.02517	0.7415	5.02533	1.14435	5.02533	1.6199	5.025	1.5363	5.02517	1.3234	5.025	1.3106	5.02533	1.37515	5.02533	1.2638
5.0335	0.74145	5.03367	1.14605	5.03367	1.62155	5.03333	1.5403	5.0335	1.32795	5.03333	1.31345	5.03367	1.3773	5.03367	1.26475
5.04183	0.74255	5.042	1.1505	5.042	1.6252	5.04167	1.54565	5.04183	1.33485	5.04167	1.3177	5.042	1.3806	5.042	1.2656
5.05017	0.7411	5.05033	1.15195	5.05033	1.63005	5.05	1.5544	5.05017	1.34465	5.05	1.32355	5.05033	1.38565	5.05033	1.27015
5.0585	0.7414	5.05867	1.1597	5.05867	1.6355	5.05833	1.5663	5.0585	1.3564	5.05833	1.33135	5.05867	1.3916	5.05867	1.273
5.06683	0.7412	5.067	1.1684	5.067	1.64435	5.06667	1.58175	5.06683	1.3736	5.06667	1.34165	5.067	1.39685	5.067	1.27905
5.07517	0.74325	5.07533	1.1796	5.07533	1.65575	5.075	1.6013	5.07517	1.39535	5.075	1.35425	5.07533	1.407	5.07533	1.28805
5.0835	0.74605	5.08367	1.1967	5.08367	1.66635	5.08333	1.62135	5.0835	1.41715	5.08333	1.3681	5.08367	1.41615	5.08367	1.2982
5.09183	0.75025	5.092	1.2162	5.092	1.6804	5.09167	1.643	5.09183	1.44365	5.09167	1.3876	5.092	1.42815	5.092	1.31285
5.10017	0.75225	5.10033	1.23545	5.10033	1.6981	5.1	1.6641	5.10017	1.47045	5.1	1.4065	5.10033	1.44125	5.10033	1.33255
5.1085	0.75705	5.10867	1.2579	5.10867	1.71575	5.10833	1.6821	5.1085	1.4963	5.10833	1.42335	5.10867	1.4542	5.10867	1.3538
5.11683	0.76055	5.117	1.28235	5.117	1.73235	5.11667	1.6964	5.11683	1.51785	5.11667	1.44125	5.117	1.46745	5.117	1.37835
5.12517	0.7698	5.12533	1.3051	5.12533	1.74655	5.125	1.7076	5.12517	1.5337	5.125	1.45555	5.12533	1.47855	5.12533	1.40205
5.1335	0.7779	5.13367	1.3222	5.13367	1.7599	5.13333	1.71885	5.1335	1.54745	5.13333	1.46865	5.13367	1.4948	5.13367	1.4238
5.14183	0.78725	5.142	1.33825	5.142	1.76905	5.14167	1.73145	5.14183	1.5533	5.14167	1.475	5.142	1.515	5.142	1.43955
5.15017	0.7959	5.15033	1.3469	5.15033	1.7745	5.15	1.7531	5.15017	1.5624	5.15	1.4784	5.15033	1.554	5.15033	1.4493
5.1585	0.80155	5.15867	1.34935	5.15867	1.78105	5.15833	1.8024	5.1585	1.58685	5.15833	1.48	5.15867	1.63255	5.15867	1.45745
5.16683	0.80545	5.167	1.3471	5.167	1.7853	5.16667	1.8958	5.16683	1.63355	5.16667	1.48	5.167	1.7729	5.167	1.45865
5.17517	0.81165	5.17533	1.3491	5.17533	1.79945	5.175	2.06645	5.17517	1.7184	5.175	1.48925	5.17533	2.01755	5.17533	1.46485
5.1835	0.8139	5.18367	1.35115	5.18367	1.8239	5.18333	2.3439	5.1835	1.85465	5.18333	1.502	5.18367	2.40285	5.18367	1.47705
5.19183	0.81435	5.192	1.35885	5.192	1.86635	5.19167	2.76005	5.19183	2.0571	5.19167	1.52635	5.192	2.9711	5.192	1.49875
5.20017	0.8129	5.20033	1.3806	5.20033	1.9357	5.2	3.33815	5.20017	2.33325	5.2	1.5685	5.20033	3.74175	5.20033	1.54595
5.2085	0.814	5.20867	1.41685	5.20867	2.03575	5.20833	4.07685	5.2085	2.68005	5.20833	1.6249	5.20867	4.70965	5.20867	1.6268
5.21683	0.8172	5.217	1.47135	5.217	2.1696	5.21667	4.9417	5.21683	3.0786	5.21667	1.69815	5.217	5.8167	5.217	1.7491
5.22517	0.8274	5.22533	1.54525	5.22533	2.3314	5.225	5.87255	5.22517	3.4969	5.225	1.78045	5.22533	6.9828	5.22533	1.91955
5.2335	0.84635	5.23367	1.63415	5.23367	2.5172	5.23333	6.7793	5.2335	3.8978	5.23333	1.86685	5.23367	8.0921	5.23367	2.1387
5.24183	0.87685	5.242	1.73105	5.242	2.7089	5.24167	7.5612	5.24183	4.23825	5.24167	1.94995	5.242	9.03085	5.242	2.3975
5.25017	0.9169	5.25033	1.828	5.25033	2.88265	5.25	8.13375	5.25017	4.47775	5.25	2.014	5.25033	9.70205	5.25033	2.67085
5.2585	0.97685	5.25867	1.9137	5.25867	3.02405	5.25833	8.44775	5.2585	4.60095	5.25833	2.0568	5.25867	10.0466	5.25867	2.93535
5.26683	1.0382	5.267	1.97825	5.267	3.11995	5.26667	8.49255	5.26683	4.60635	5.26667	2.076	5.267	10.0589	5.267	3.1655
5.27517	1.12085	5.27533	2.0148	5.27533	3.15915	5.275	8.28785	5.27517	4.5007	5.275	2.0694	5.27533	9.77785	5.27533	3.33395
5.2835	1.19065	5.28367	2.0233	5.28367	3.1475	5.28333	7.8852	5.2835	4.31245	5.28333	2.04355	5.28367	9.27055	5.28367	3.42425
5.29183	1.2981	5.292	2.00225	5.292	3.0887	5.29167	7.3426	5.29183	4.0681	5.29167	2.00335	5.292	8.607	5.292	3.4339
5.30017	1.3494	5.30033	1.9584	5.30033	2.9961	5.3	6.7292	5.30017	3.7972	5.3	1.952	5.30033	7.8696	5.30033	3.37115
5.3085	1.3529	5.30867	1.8998	5.30867	2.88305	5.30833	6.0993	5.3085	3.52435	5.30833	1.89895	5.30867	7.11025	5.30867	3.25035
5.31683	1.3532	5.317	1.83105	5.317	2.76045	5.31667	5.49115	5.31683	3.2631	5.31667	1.84755	5.317	6.3776	5.317	3.0909
5.32517	1.33405	5.32533	1.7597	5.32533	2.63865	5.325	4.9313	5.32517	3.0264	5.325	1.79995	5.32533	5.697	5.32533	2.9119
5.3335	1.2993	5.33367	1.6896	5.33367	2.5274	5.33333	4.4333	5.3335	2.81845	5.33333	1.7589	5.33367	5.08805	5.33367	2.72835
5.34183	1.25615	5.342	1.62855	5.342	2.42385	5.34167	3.9994	5.34183	2.6385	5.34167	1.724	5.342	4.55085	5.342	2.5515
5.35017	1.20385	5.35033	1.5728	5.35033	2.33735	5.35	3.63385	5.35017	2.48805	5.35	1.6954	5.35033	4.0898	5.35033	2.39285
5.3585	1.14785	5.35867	1.52815	5.35867	2.26465	5.35833	3.33105	5.3585	2.36235	5.35833	1.67325	5.35867	3.69805	5.35867	2.25165
5.36683	1.09745	5.367	1.4955	5.367	2.20255	5.36667	3.0834	5.36683	2.2574	5.36667	1.65485	5.367	3.3704	5.367	2.1318
5.37517	1.05035	5.37533	1.4709	5.37533	2.15515	5.375	2.8823	5.37517	2.1698	5.375	1.6427	5.37533	3.09965	5.37533	2.02925
5.3835	1.0132	5.38367	1.4549	5.38367	2.1169	5.38333	2.7216	5.3835	2.0971	5.38333	1.63315	5.38367	2.876	5.38367	1.94415
5.39183	0.9756	5.392	1.4474	5.392	2.0884	5.39167	2.59385	5.39183	2.0355	5.39167	1.6265	5.392	2.6922	5.392	1.87455
5.40017	0.9419	5.40033	1.4441	5.40033	2.06885	5.4	2.49035	5.40017	1.98935	5.4	1.6237	5.40033	2.54445	5.40033	1.81965
5.4085	0.9154	5.40867	1.44525	5.40867	2.0526	5.40833	2.4087	5.4085	1.95285	5.40833	1.62505	5.40867	2.42455	5.40867	1.7767
5.41683	0.895	5.417	1.4496	5.417	2.0409	5.41667	2.3424	5.41683	1.9268	5.41667	1.62695	5.417	2.3281	5.417	1.74025
5.42517	0.8815	5.42533	1.45655	5.42533	2.035	5.425	2.29265	5.42517	1.9105	5.425	1.6363	5.42533	2.25345	5.42533	1.7131
5.4335	0.8703	5.43367	1.46565	5.43367	2.0307	5.43333	2.25235	5.4335	1.89665	5.43333	1.6472	5.43367	2.1921	5.43367	1.6884
5.44183	0.86435	5.442	1.47995	5.442	2.0342	5.44167	2.2248	5.44183	1.8851	5.44167	1.6593	5.442	2.14185	5.442	1.6703
5.45017	0.8602	5.45033	1.5	5.45033	2.0401	5.45	2.20135	5.45017	1.8736	5.45	1.67125	5.45033	2.09715	5.45033	1.6558
5.4585	0.8588	5.45867	1.523	5.45867	2.04995	5.45833	2.18055	5.4585	1.85685	5.45833	1.6803	5.45867	2.05805	5.45867	1.64865
5.46683	0.85505	5.467	1.54635	5.467	2.062	5.46667	2.158	5.46683	1.8351	5.46667	1.6837	5.467	2.0196	5.467	1.64585
5.47517	0.85475	5.47533	1.57125	5.47533	2.0751	5.475	2.13595	5.47517	1.8108	5.475	1.68275	5.47533	1.9839	5.47533	1.649
5.4835	0.85565	5.48367	1.5908	5.48367	2.0829	5.48333	2.1079	5.4835	1.78185	5.48333	1.6757	5.48367	1.9486	5.48367	1.6547
5.49183	0.86	5.492	1.6018	5.492	2.08405	5.49167	2.07705	5.49183	1.75035	5.49167	1.6627	5.492	1.9134	5.492	1.66085
5.50017	0.8652	5.50033	1.6013	5.50033	2.07845	5.5	2.04535	5.50017	1.7218	5.5	1.6473	5.50033	1.8825	5.50033	1.6632
5.5085	0.875	5.50867	1.5905	5.50867	2.06815	5.50833	2.0116	5.5085	1.69205	5.50833	1.6295	5.50867	1.8511	5.50867	1.65965
5.51683	0.88495	5.517	1.5732	5.517	2.056	5.51667	1.98215	5.51683	1.6658	5.51667	1.6135	5.517	1.82395	5.517	1.65465
5.52517	0.89535	5.52533	1.55005	5.52533	2.0411	5.525	1.95595	5.52517	1.6425	5.525	1.60035	5.52533	1.79925	5.52533	1.64585
5.5335	0.9043	5.53367	1.52375	5.53367	2.02535	5.53333	1.92855	5.5335	1.62025	5.53333	1.58555	5.53367	1.7763	5.53367	1.63275
5.54183	0.9076	5.542	1.49755	5.542	2.01235	5.54167	1.90825	5.54183	1.60485	5.54167	1.57475	5.542	1.7588	5.542	1.6245
5.55017	0.9081	5.55033	1.47585	5.55033	1.9992	5.55	1.88915	5.55017	1.5909	5.55	1.566	5.55033	1.74165	5.55033	1.616
5.5585	0.90235	5.55867	1.4534	5.55867	1.98865	5.55833	1.87185	5.5585	1.57695	5.55833	1.55805	5.55867	1.72755	5.55867	1.6096
5.56683	0.8921	5.567	1.43495	5.567	1.97945	5.56667	1.85745	5.56683	1.5678	5.56667	1.5504	5.567	1.71405	5.567	1.60145
5.57517	0.87975	5.57533	1.41595	5.57533	1.9697	5.575	1.84305	5.57517	1.55895	5.575	1.54515	5.57533	1.70215	5.57533	1.59365
5.5835	0.86615	5.58367	1.40065	5.58367	1.96355	5.58333	1.83265	5.5835	1.5515	5.58333	1.54155	5.58367	1.6925	5.58367	1.58725
5.59183	0.8514	5.592	1.3867	5.592	1.958	5.59167	1.8247	5.59183	1.547	5.59167	1.54055	5.592	1.68395	5.592	1.5809
5.60017	0.84215	5.60033	1.3779	5.60033	1.95465	5.6	1.8163	5.60017	1.5436	5.6	1.539	5.60033	1.6771	5.60033	1.57235
5.6085	0.8316	5.60867	1.3705	5.60867	1.95245	5.60833	1.8091	5.6085	1.54015	5.60833	1.53825	5.60867	1.67125	5.60867	1.56445
5.61683	0.81965	5.617	1.3622	5.617	1.95235	5.61667	1.8049	5.61683	1.54	5.61667	1.5401	5.617	1.66805	5.617	1.5577
5.62517	0.80865	5.62533	1.35745	5.62533	1.9534	5.625	1.801	5.62517	1.5389	5.625	1.54295	5.62533	1.6648	5.62533	1.55035
5.6335	0.80175	5.63367	1.3522	5.63367	1.95455	5.63333	1.7986	5.6335	1.539	5.63333	1.5461	5.63367	1.66125	5.63367	1.54455
5.64183	0.7951	5.642	1.35185	5.642	1.9565	5.64167	1.79375	5.64183	1.53745	5.64167	1.54645	5.642	1.65595	5.642	1.53805
5.65017	0.78745	5.65033	1.34885	5.65033	1.9587	5.65	1.7926	5.65017	1.53625	5.65	1.5494	5.65033	1.6539	5.65033	1.53435
5.6585	0.78365	5.65867	1.3478	5.65867	1.9619	5.65833	1.7906	5.6585	1.5376	5.65833	1.55255	5.65867	1.65405	5.65867	1.5323
5.66683	0.7794	5.667	1.3489	5.667	1.9676	5.66667	1.7896	5.66683	1.53825	5.66667	1.5556	5.667	1.6536	5.667	1.5315
5.67517	0.77545	5.67533	1.3485	5.67533	1.9697	5.675	1.78725	5.67517	1.53625	5.675	1.55505	5.67533	1.65165	5.67533	1.5292
5.6835	0.77165	5.68367	1.34915	5.68367	1.9728	5.68333	1.78685	5.6835	1.53745	5.68333	1.55965	5.68367	1.6523	5.68367	1.5291
5.69183	0.7678	5.692	1.3482	5.692	1.97755	5.69167	1.7859	5.69183	1.5385	5.69167	1.56145	5.692	1.6529	5.692	1.5269
5.70017	0.76585	5.70033	1.35075	5.70033	1.9844	5.7	1.78775	5.70017	1.5395	5.7	1.56545	5.70033	1.65665	5.70033	1.5282
5.7085	0.76165	5.70867	1.3525	5.70867	1.99015	5.70833	1.7905	5.7085	1.54075	5.70833	1.56925	5.70867	1.6582	5.70867	1.52665
5.71683	0.7602	5.717	1.35465	5.717	1.99835	5.71667	1.793	5.71683	1.54285	5.71667	1.57425	5.717	1.6595	5.717	1.52795
5.72517	0.75825	5.72533	1.35815	5.72533	2.00255	5.725	1.79375	5.72517	1.54375	5.725	1.57735	5.72533	1.6614	5.72533	1.5255
5.7335	0.75405	5.73367	1.36195	5.73367	2.00985	5.73333	1.796	5.7335	1.5473	5.73333	1.5812	5.73367	1.66495	5.73367	1.5253
5.74183	0.75295	5.742	1.366	5.742	2.01775	5.74167	1.7993	5.74183	1.5496	5.74167	1.58665	5.742	1.66795	5.742	1.5263
5.75017	0.7502	5.75033	1.36845	5.75033	2.0252	5.75	1.80475	5.75017	1.55375	5.75	1.59285	5.75033	1.67185	5.75033	1.5281
5.7585	0.74765	5.75867	1.3724	5.75867	2.0323	5.75833	1.80845	5.7585	1.55795	5.75833	1.59685	5.75867	1.6765	5.75867	1.5272
5.76683	0.746	5.767	1.3775	5.767	2.04085	5.76667	1.8135	5.76683	1.56305	5.76667	1.6026	5.767	1.68055	5.767	1.52945
5.77517	0.74695	5.77533	1.3803	5.77533	2.04925	5.775	1.81855	5.77517	1.56685	5.775	1.60875	5.77533	1.68575	5.77533	1.53295
5.7835	0.746	5.78367	1.38445	5.78367	2.0583	5.78333	1.8247	5.7835	1.57205	5.78333	1.6157	5.78367	1.6914	5.78367	1.53685
5.79183	0.7464	5.792	1.39035	5.792	2.0666	5.79167	1.8287	5.79183	1.57725	5.79167	1.62045	5.792	1.69435	5.792	1.53885
5.80017	0.7456	5.80033	1.3966	5.80033	2.07605	5.8	1.8351	5.80017	1.582	5.8	1.62765	5.80033	1.7009	5.80033	1.5443
5.8085	0.74515	5.80867	1.40015	5.80867	2.08695	5.80833	1.84335	5.8085	1.59	5.80833	1.6363	5.80867	1.7081	5.80867	1.54955
5.81683	0.74655	5.817	1.407	5.817	2.09835	5.81667	1.84865	5.81683	1.59535	5.81667	1.6436	5.817	1.71475	5.817	1.5547
5.82517	0.7455	5.82533	1.4128	5.82533	2.11025	5.825	1.85515	5.82517	1.6015	5.825	1.651	5.82533	1.72055	5.82533	1.56185
5.8335	0.74515	5.83367	1.41755	5.83367	2.1213	5.83333	1.86285	5.8335	1.60825	5.83333	1.65905	5.83367	1.72785	5.83367	1.56865
5.84183	0.7454	5.842	1.42445	5.842	2.13135	5.84167	1.8698	5.84183	1.6146	5.84167	1.6666	5.842	1.73395	5.842	1.5736
5.85017	0.74485	5.85033	1.4284	5.85033	2.14435	5.85	1.8773	5.85017	1.61995	5.85	1.67505	5.85033	1.7412	5.85033	1.57965
5.8585	0.7266	5.85867	1.43375	5.85867	2.158	5.85833	1.88465	5.8585	1.628	5.85833	1.68265	5.85867	1.74965	5.85867	1.58615
5.86683	0.75105	5.867	1.44345	5.867	2.16875	5.86667	1.8914	5.86683	1.63425	5.86667	1.69045	5.867	1.75865	5.867	1.592
5.87517	0.7507	5.87533	1.45265	5.87533	2.18175	5.875	1.89965	5.87517	1.64125	5.875	1.70065	5.87533	1.7675	5.87533	1.59935
5.8835	0.745	5.88367	1.45825	5.88367	2.1963	5.88333	1.91	5.8835	1.64995	5.88333	1.71065	5.88367	1.77635	5.88367	1.6062
5.89183	0.7429	5.892	1.46935	5.892	2.2095	5.89167	1.9191	5.89183	1.65875	5.89167	1.72155	5.892	1.78735	5.892	1.6136
5.90017	0.74155	5.90033	1.47345	5.90033	2.2246	5.9	1.9284	5.90017	1.6667	5.9	1.73435	5.90033	1.7966	5.90033	1.6219
5.9085	0.74155	5.90867	1.4825	5.90867	2.2412	5.90833	1.93925	5.9085	1.6762	5.90833	1.74415	5.90867	1.80635	5.90867	1.62975
5.91683	0.74225	5.917	1.4924	5.917	2.2551	5.91667	1.94915	5.91683	1.6861	5.91667	1.7554	5.917	1.81635	5.917	1.63735
5.92517	0.74195	5.92533	1.5044	5.92533	2.27205	5.925	1.96185	5.92517	1.69625	5.925	1.76725	5.92533	1.82755	5.92533	1.64675
5.9335	0.74085	5.93367	1.5138	5.93367	2.29005	5.93333	1.97655	5.9335	1.7084	5.93333	1.78	5.93367	1.8395	5.93367	1.658
5.94183	0.74085	5.942	1.52415	5.942	2.30415	5.94167	1.9894	5.94183	1.71815	5.94167	1.7925	5.942	1.8495	5.942	1.66755
5.95017	0.7395	5.95033	1.53435	5.95033	2.3234	5.95	2.0058	5.95017	1.73145	5.95	1.80615	5.95033	1.8645	5.95033	1.68275
5.9585	0.74095	5.95867	1.54695	5.95867	2.3398	5.95833	2.02205	5.9585	1.74525	5.95833	1.81835	5.95867	1.87625	5.95867	1.6997
5.96683	0.7412	5.967	1.5603	5.967	2.3584	5.96667	2.0407	5.96683	1.7571	5.96667	1.8328	5.967	1.88905	5.967	1.7245
5.97517	0.73945	5.97533	1.5731	5.97533	2.3786	5.975	2.0592	5.97517	1.7708	5.975	1.8471	5.97533	1.9012	5.97533	1.75615
5.9835	0.7357	5.98367	1.58555	5.98367	2.4002	5.98333	2.07935	5.9835	1.78825	5.98333	1.86405	5.98367	1.91695	5.98367	1.79675
5.99183	0.7294	5.992	1.5985	5.992	2.41975	5.99167	2.09685	5.99183	1.80175	5.99167	1.8792	5.992	1.9321	5.992	1.8455
6.00017	0.7567	6.00033	1.61215	6.00033	2.43415	6	2.1153	6.00017	1.8189	6	1.89575	6.00033	1.9482	6.00033	1.90425
6.0085	0.74775	6.00867	1.6274	6.00867	2.49525	6.00833	2.13255	6.0085	1.83575	6.00833	1.91485	6.00867	1.96485	6.00867	1.9637
6.01683	0.7562	6.017	1.6436	6.017	2.4971	6.01667	2.1487	6.01683	1.8524	6.01667	1.93185	6.017	1.98165	6.017	2.0212
6.02517	0.74475	6.02533	1.66025	6.02533	2.52145	6.025	2.1647	6.02517	1.86715	6.025	1.9503	6.02533	1.99805	6.02533	2.07235
6.0335	0.7767	6.03367	1.67435	6.03367	2.5524	6.03333	2.18235	6.0335	1.8859	6.03333	1.9698	6.03367	2.0166	6.03367	2.1119
6.04183	0.71085	6.042	1.69225	6.042	2.5824	6.04167	2.1995	6.04183	1.9026	6.04167	1.99155	6.042	2.0365	6.042	2.13735
6.05017	0.7374	6.05033	1.7101	6.05033	2.6144	6.05	2.2195	6.05017	1.92245	6.05	2.01445	6.05033	2.05805	6.05033	2.14945
6.0585	0.74645	6.05867	1.7312	6.05867	2.6495	6.05833	2.2392	6.0585	1.9453	6.05833	2.03805	6.05867	2.0808	6.05867	2.15095
6.06683	0.74725	6.067	1.74925	6.067	2.6874	6.06667	2.26265	6.06683	1.96825	6.06667	2.06585	6.067	2.1068	6.067	2.1456
6.07517	0.7479	6.07533	1.76885	6.07533	2.72325	6.075	2.2855	6.07517	1.99115	6.075	2.0924	6.07533	2.1307	6.07533	2.13485
6.0835	0.749	6.08367	1.7915	6.08367	2.7642	6.08333	2.3122	6.0835	2.0176	6.08333	2.1213	6.08367	2.15815	6.08367	2.1222
6.09183	0.7515	6.092	1.81465	6.092	2.80835	6.09167	2.3389	6.09183	2.0437	6.09167	2.1499	6.092	2.1855	6.092	2.11165
6.10017	0.7506	6.10033	1.83815	6.10033	2.85575	6.1	2.36765	6.10017	2.06945	6.1	2.1827	6.10033	2.2137	6.10033	2.10345
6.1085	0.75135	6.10867	1.8647	6.10867	2.9048	6.10833	2.3997	6.1085	2.1012	6.10833	2.216	6.10867	2.2469	6.10867	2.10255
6.11683	0.7499	6.117	1.89355	6.117	2.94915	6.11667	2.43185	6.11683	2.13065	6.11667	2.24985	6.117	2.279	6.117	2.1058
6.12517	0.75055	6.12533	1.9236	6.12533	3.00285	6.125	2.4656	6.12517	2.1607	6.125	2.2822	6.12533	2.3138	6.12533	2.1114
6.1335	0.74645	6.13367	1.95425	6.13367	3.053	6.13333	2.50075	6.1335	2.1913	6.13333	2.31825	6.13367	2.3474	6.13367	2.12155
6.14183	0.7485	6.142	1.9891	6.142	3.13215	6.14167	2.5401	6.14183	2.2251	6.14167	2.35555	6.142	2.38475	6.142	2.13505
6.15017	0.74915	6.15033	2.02275	6.15033	3.1941	6.15	2.584	6.15017	2.26065	6.15	2.3943	6.15033	2.42495	6.15033	2.1528
6.1585	0.75045	6.15867	2.06125	6.15867	3.2347	6.15833	2.6322	6.1585	2.2966	6.15833	2.43435	6.15867	2.4663	6.15867	2.17205
6.16683	0.75015	6.167	2.10065	6.167	3.29705	6.16667	2.68595	6.16683	2.3361	6.16667	2.4787	6.167	2.51065	6.167	2.1943
6.17517	0.7516	6.17533	2.1399	6.17533	3.36455	6.175	2.74905	6.17517	2.3803	6.175	2.52635	6.17533	2.55895	6.17533	2.22105
6.1835	0.7519	6.18367	2.1838	6.18367	3.4319	6.18333	2.8201	6.1835	2.4273	6.18333	2.5773	6.18367	2.61115	6.18367	2.25105
6.19183	0.7522	6.192	2.2296	6.192	3.5059	6.19167	2.90355	6.19183	2.48045	6.19167	2.6323	6.192	2.6691	6.192	2.2811
6.20017	0.7528	6.20033	2.2753	6.20033	3.58355	6.2	3.00205	6.20017	2.54325	6.2	2.69545	6.20033	2.7383	6.20033	2.3161
6.2085	0.7538	6.20867	2.3263	6.20867	3.6652	6.20833	3.124	6.2085	2.6302	6.20833	2.76785	6.20867	2.8352	6.20867	2.35535
6.21683	0.75405	6.217	2.38145	6.217	3.75385	6.21667	3.2828	6.21683	2.7616	6.21667	2.85935	6.217	2.984	6.217	2.39785
6.22517	0.7554	6.22533	2.44035	6.22533	3.85715	6.225	3.5163	6.22517	2.98745	6.225	2.99755	6.22533	3.23735	6.22533	2.44665
6.2335	0.755	6.23367	2.5099	6.23367	3.9877	6.23333	3.88055	6.2335	3.3706	6.23333	3.2195	6.23367	3.672	6.23367	2.5012
6.24183	0.7564	6.242	2.60125	6.242	4.16805	6.24167	4.4676	6.24183	4.00445	6.24167	3.5953	6.242	4.3888	6.242	2.56345
6.25017	0.7582	6.25033	2.7364	6.25033	4.4478	6.25	5.39645	6.25017	4.97235	6.25	4.2223	6.25033	5.4893	6.25033	2.6365
6.2585	0.75995	6.25867	2.9566	6.25867	4.90625	6.25833	6.7915	6.2585	6.3433	6.25833	5.20795	6.25867	7.0492	6.25867	2.73425
6.26683	0.7552	6.267	3.3427	6.267	5.6524	6.26667	8.73425	6.26683	8.12195	6.26667	6.63865	6.267	9.07675	6.267	2.88065
6.27517	0.756	6.27533	4.0052	6.27533	6.8162	6.275	11.246	6.27517	10.2596	6.275	8.5533	6.27533	11.5103	6.27533	3.12785
6.2835	0.75595	6.28367	5.08315	6.28367	8.51915	6.28333	14.2455	6.2835	12.6392	6.28333	10.9132	6.28367	14.2197	6.28367	3.55205
6.29183	0.7599	6.292	6.70065	6.292	10.8336	6.29167	17.5674	6.29183	15.117	6.29167	13.6149	6.292	17.0184	6.292	4.2585
6.30017	0.75735	6.30033	8.9295	6.30033	13.7393	6.3	20.9823	6.30017	17.5528	6.3	16.477	6.30033	19.7279	6.30033	5.3489
6.3085	0.75845	6.30867	11.7567	6.30867	17.1271	6.30833	24.262	6.3085	19.8113	6.30833	19.3178	6.30867	22.1883	6.30867	6.907
6.31683	0.76025	6.317	15.0659	6.317	20.806	6.31667	27.2005	6.31683	21.7802	6.31667	21.9575	6.317	24.2921	6.317	8.9479
6.32517	0.7673	6.32533	18.64	6.32533	24.5333	6.325	29.6693	6.32517	23.4209	6.325	24.2739	6.32533	25.9856	6.32533	11.3982
6.3335	0.7685	6.33367	22.2334	6.33367	28.074	6.33333	31.5991	6.3335	24.7341	6.33333	26.187	6.33367	27.2694	6.33367	14.1258
6.34183	0.7782	6.342	25.5903	6.342	31.2433	6.34167	33.007	6.34183	25.7218	6.34167	27.6807	6.342	28.1671	6.342	16.9567
6.35017	0.787	6.35033	28.527	6.35033	33.9151	6.35	33.9596	6.35017	26.4203	6.35	28.7712	6.35033	28.7275	6.35033	19.698
6.3585	0.8009	6.35867	30.9178	6.35867	36.0341	6.35833	34.477	6.3585	26.8667	6.35833	29.5041	6.35867	29.0057	6.35867	22.1911
6.36683	0.8159	6.367	32.7296	6.367	37.6145	6.36667	34.648	6.36683	27.0965	6.36667	29.9192	6.367	29.0618	6.367	24.3333
6.37517	0.8404	6.37533	33.9762	6.37533	38.7034	6.375	34.5547	6.37517	27.128	6.375	30.0808	6.37533	28.9414	6.37533	26.0607
6.3835	0.8708	6.38367	34.7251	6.38367	39.3747	6.38333	34.2597	6.3835	27.0088	6.38333	30.0303	6.38367	28.6546	6.38367	27.3623
6.39183	0.9127	6.392	35.0434	6.392	39.69	6.39167	33.7998	6.39183	26.7598	6.39167	29.8127	6.392	28.2462	6.392	28.2711
6.40017	0.9614	6.40033	35.0177	6.40033	39.7131	6.4	33.2289	6.40017	26.4137	6.4	29.4613	6.40033	27.7556	6.40033	28.8359
6.4085	1.01925	6.40867	34.715	6.40867	39.5093	6.40833	32.5831	6.4085	25.9921	6.40833	29.0076	6.40867	27.2032	6.40867	29.1088
6.41683	1.07935	6.417	34.1874	6.417	39.1239	6.41667	31.8736	6.41683	25.5199	6.41667	28.4864	6.417	26.5973	6.417	29.1351
6.42517	1.13525	6.42533	33.485	6.42533	38.5981	6.425	31.1318	6.42517	25.0214	6.425	27.9026	6.42533	25.9655	6.42533	28.975
6.4335	1.18605	6.43367	32.6754	6.43367	37.9276	6.43333	30.3809	6.4335	24.514	6.43333	27.2595	6.43367	25.317	6.43367	28.6564
6.44183	1.2265	6.442	31.7662	6.442	37.1943	6.44167	29.6436	6.44183	24.0153	6.44167	26.6003	6.442	24.651	6.442	28.221
6.45017	1.25515	6.45033	30.7737	6.45033	36.3994	6.45	28.9361	6.45017	23.5304	6.45	25.9252	6.45033	23.9684	6.45033	27.694
6.4585	1.27195	6.45867	29.7476	6.45867	35.5673	6.45833	28.2737	6.4585	23.0593	6.45833	25.243	6.45867	23.2916	6.45867	27.1166
6.46683	1.28345	6.467	28.7105	6.467	34.7083	6.46667	27.6613	6.46683	22.5888	6.46667	24.5582	6.467	22.6089	6.467	26.509
6.47517	1.2842	6.47533	27.669	6.47533	33.8444	6.475	27.0874	6.47517	22.1112	6.475	23.8797	6.47533	21.9324	6.47533	25.8998
6.4835	1.27935	6.48367	26.6328	6.48367	32.9688	6.48333	26.5357	6.4835	21.5988	6.48333	23.1959	6.48367	21.2558	6.48367	25.3215
6.49183	1.2715	6.492	25.6249	6.492	32.0977	6.49167	25.9814	6.49183	21.0539	6.49167	22.5012	6.492	20.5883	6.492	24.8117
6.50017	1.2623	6.50033	24.6316	6.50033	31.2247	6.5	25.402	6.50017	20.4412	6.5	21.8	6.50033	19.9179	6.50033	24.3842
6.5085	1.25055	6.50867	23.6613	6.50867	30.3601	6.50833	24.7605	6.5085	19.7715	6.50833	21.0932	6.50867	19.2564	6.50867	24.0348
6.51683	1.24045	6.517	22.7183	6.517	29.4959	6.51667	24.0614	6.51683	19.0676	6.51667	20.3784	6.517	18.6004	6.517	23.7511
6.52517	1.23585	6.52533	21.8129	6.52533	28.639	6.525	23.3074	6.52517	18.3435	6.525	19.6594	6.52533	17.9581	6.52533	23.5281
6.5335	1.2321	6.53367	20.9332	6.53367	27.7846	6.53333	22.517	6.5335	17.6117	6.53333	18.9431	6.53367	17.3258	6.53367	23.3084
6.54183	1.23045	6.542	20.0874	6.542	26.9293	6.54167	21.6953	6.54183	16.8912	6.54167	18.229	6.542	16.7075	6.542	23.0331
6.55017	1.23185	6.55033	19.2678	6.55033	26.0825	6.55	20.8576	6.55017	16.1962	6.55	17.5297	6.55033	16.1084	6.55033	22.6726
6.5585	1.2378	6.55867	18.4814	6.55867	25.2441	6.55833	20.0298	6.5585	15.5268	6.55833	16.8486	6.55867	15.5285	6.55867	22.1892
6.56683	1.24275	6.567	17.7247	6.567	24.4195	6.56667	19.2312	6.56683	14.8851	6.56667	16.1884	6.567	14.9717	6.567	21.569
6.57517	1.24865	6.57533	17.0019	6.57533	23.6103	6.575	18.4644	6.57517	14.275	6.575	15.5503	6.57533	14.421	6.57533	20.831
6.5835	1.25745	6.58367	16.3127	6.58367	22.8218	6.58333	17.731	6.5835	13.6967	6.58333	14.9381	6.58367	13.8923	6.58367	20.0148
6.59183	1.2586	6.592	15.6545	6.592	22.0491	6.59167	17.0427	6.59183	13.1489	6.59167	14.3502	6.592	13.3812	6.592	19.1495
6.60017	1.2562	6.60033	15.0246	6.60033	21.3152	6.6	16.3916	6.60017	12.6327	6.6	13.7945	6.60033	12.8947	6.60033	18.2809
6.6085	1.25335	6.60867	14.4328	6.60867	20.6106	6.60833	15.7714	6.6085	12.1421	6.60833	13.2705	6.60867	12.4251	6.60867	17.4321
6.61683	1.24545	6.617	13.8737	6.617	19.918	6.61667	15.1859	6.61683	11.6776	6.61667	12.7644	6.617	11.9794	6.617	16.6206
6.62517	1.23795	6.62533	13.3512	6.62533	19.2444	6.625	14.6325	6.62517	11.2379	6.625	12.2817	6.62533	11.5485	6.62533	15.8562
6.6335	1.22905	6.63367	12.8513	6.63367	18.6029	6.63333	14.1108	6.6335	10.8243	6.63333	11.8258	6.63367	11.137	6.63367	15.1412
6.64183	1.22485	6.642	12.374	6.642	17.9827	6.64167	13.6189	6.64183	10.4351	6.64167	11.3926	6.642	10.7396	6.642	14.4701
6.65017	1.2286	6.65033	11.9268	6.65033	17.3839	6.65	13.1565	6.65017	10.0797	6.65	10.9826	6.65033	10.3642	6.65033	13.8441
6.6585	1.2506	6.65867	11.5046	6.65867	16.812	6.65833	12.7219	6.6585	9.7547	6.65833	10.5961	6.65867	10.0039	6.65867	13.2548
6.66683	1.2971	6.667	11.1048	6.667	16.2628	6.66667	12.3162	6.66683	9.4746	6.66667	10.234	6.667	9.6629	6.667	12.7066
6.67517	1.38065	6.67533	10.7258	6.67533	15.7325	6.675	11.9426	6.67517	9.2514	6.675	9.8936	6.67533	9.3419	6.67533	12.195
6.6835	1.5383	6.68367	10.3694	6.68367	15.2242	6.68333	11.5995	6.6835	9.0948	6.68333	9.57405	6.68367	9.04	6.68367	11.7248
6.69183	1.81045	6.692	10.0273	6.692	14.7407	6.69167	11.291	6.69183	9.0179	6.69167	9.2806	6.692	8.7588	6.692	11.2889
6.70017	2.2749	6.70033	9.7019	6.70033	14.2823	6.7	11.0157	6.70017	9.0447	6.7	9.01495	6.70033	8.49905	6.70033	10.8869
6.7085	3.05475	6.70867	9.38915	6.70867	13.8578	6.70833	10.7759	6.7085	9.19035	6.70833	8.7778	6.70867	8.25955	6.70867	10.5315
6.71683	4.3375	6.717	9.0959	6.717	13.4627	6.71667	10.5746	6.71683	9.46585	6.71667	8.5734	6.717	8.04315	6.717	10.2223
6.72517	6.37485	6.72533	8.8131	6.72533	13.1011	6.725	10.4099	6.72517	9.87335	6.725	8.40095	6.72533	7.84675	6.72533	9.9635
6.7335	9.45715	6.73367	8.54705	6.73367	12.7711	6.73333	10.2721	6.7335	10.4044	6.73333	8.2606	6.73367	7.66775	6.73367	9.7564
6.74183	13.8099	6.742	8.29245	6.742	12.4719	6.74167	10.1558	6.74183	11.0289	6.74167	8.14675	6.742	7.5081	6.742	9.607
6.75017	19.4367	6.75033	8.05225	6.75033	12.1988	6.75	10.0535	6.75017	11.6971	6.75	8.0565	6.75033	7.3624	6.75033	9.50735
6.7585	26.0086	6.75867	7.8224	6.75867	11.9419	6.75833	9.9555	6.7585	12.3558	6.75833	7.9816	6.75867	7.2222	6.75867	9.4482
6.76683	32.95	6.767	7.60545	6.767	11.6971	6.76667	9.84695	6.76683	12.9421	6.76667	7.91355	6.767	7.085	6.767	9.4213
6.77517	39.6362	6.77533	7.39765	6.77533	11.4579	6.775	9.7186	6.77517	13.4049	6.775	7.84055	6.77533	6.9487	6.77533	9.40855
6.7835	45.5354	6.78367	7.19385	6.78367	11.2158	6.78333	9.56585	6.7835	13.7006	6.78333	7.7585	6.78367	6.8079	6.78367	9.39465
6.79183	50.3029	6.792	7	6.792	10.9694	6.79167	9.37995	6.79183	13.8087	6.79167	7.65875	6.792	6.66185	6.792	9.3647
6.80017	53.8269	6.80033	6.8126	6.80033	10.7078	6.8	9.1597	6.80017	13.7192	6.8	7.53485	6.80033	6.5115	6.80033	9.29995
6.8085	56.0887	6.80867	6.6333	6.80867	10.4268	6.80833	8.91025	6.8085	13.4467	6.80833	7.3815	6.80867	6.3534	6.80867	9.19365
6.81683	57.1901	6.817	6.4594	6.817	10.1288	6.81667	8.63325	6.81683	13.0072	6.81667	7.203	6.817	6.18425	6.817	9.03325
6.82517	57.2717	6.82533	6.28605	6.82533	9.81915	6.825	8.34105	6.82517	12.4407	6.825	7.00385	6.82533	6.0113	6.82533	8.82365
6.8335	56.484	6.83367	6.11735	6.83367	9.51115	6.83333	8.03925	6.8335	11.7805	6.83333	6.78785	6.83367	5.8348	6.83367	8.5717
6.84183	54.9693	6.842	5.95825	6.842	9.1979	6.84167	7.73825	6.84183	11.0647	6.84167	6.55975	6.842	5.65855	6.842	8.2849
6.85017	52.8612	6.85033	5.8051	6.85033	8.8839	6.85	7.4438	6.85017	10.3305	6.85	6.3324	6.85033	5.48735	6.85033	7.97355
6.8585	50.2882	6.85867	5.6564	6.85867	8.5708	6.85833	7.15755	6.8585	9.6002	6.85833	6.101	6.85867	5.3197	6.85867	7.6507
6.86683	47.349	6.867	5.51545	6.867	8.27375	6.86667	6.88715	6.86683	8.9018	6.86667	5.87595	6.867	5.1588	6.867	7.32835
6.87517	44.1555	6.87533	5.3829	6.87533	7.98985	6.875	6.6326	6.87517	8.2437	6.875	5.6611	6.87533	5.0076	6.87533	7.0154
6.8835	40.7782	6.88367	5.253	6.88367	7.72385	6.88333	6.3932	6.8835	7.63695	6.88333	5.45585	6.88367	4.8645	6.88367	6.71305
6.89183	37.3324	6.892	5.13085	6.892	7.469	6.89167	6.16995	6.89183	7.0891	6.89167	5.2666	6.892	4.73	6.892	6.42485
6.90017	33.8892	6.90033	5.0133	6.90033	7.2328	6.9	5.9638	6.90017	6.60345	6.9	5.0898	6.90033	4.60425	6.90033	6.15875
6.9085	30.5195	6.90867	4.90315	6.90867	7.01295	6.90833	5.77345	6.9085	6.17205	6.90833	4.92905	6.90867	4.4883	6.90867	5.9118
6.91683	27.3017	6.917	4.79715	6.917	6.8096	6.91667	5.5966	6.91683	5.79615	6.91667	4.78145	6.917	4.3804	6.917	5.68235
6.92517	24.2673	6.92533	4.69775	6.92533	6.6201	6.925	5.43135	6.92517	5.47125	6.925	4.64745	6.92533	4.2807	6.92533	5.4708
6.9335	21.4597	6.93367	4.60455	6.93367	6.44435	6.93333	5.27915	6.9335	5.18625	6.93333	4.5244	6.93367	4.18745	6.93367	5.27365
6.94183	18.8966	6.942	4.51215	6.942	6.27815	6.94167	5.13815	6.94183	4.9384	6.94167	4.41105	6.942	4.10045	6.942	5.08945
6.95017	16.6075	6.95033	4.4283	6.95033	6.1271	6.95	5.0078	6.95017	4.7266	6.95	4.30895	6.95033	4.0188	6.95033	4.9212
6.9585	14.5851	6.95867	4.34705	6.95867	5.9832	6.95833	4.88795	6.9585	4.5423	6.95833	4.21305	6.95867	3.94155	6.95867	4.7659
6.96683	12.8176	6.967	4.2675	6.967	5.8495	6.96667	4.77355	6.96683	4.37835	6.96667	4.12195	6.967	3.8668	6.967	4.6197
6.97517	11.2844	6.97533	4.1908	6.97533	5.72345	6.975	4.668	6.97517	4.23485	6.975	4.039	6.97533	3.7989	6.97533	4.48655
6.9835	9.9705	6.98367	4.1194	6.98367	5.60715	6.98333	4.5687	6.9835	4.10755	6.98333	3.95825	6.98367	3.73435	6.98367	4.3642
6.99183	8.84975	6.992	4.05265	6.992	5.49515	6.99167	4.4747	6.99183	3.99405	6.99167	3.88185	6.992	3.6735	6.992	4.25105
7.00017	7.88865	7.00033	3.9881	7.00033	5.3875	7	4.38665	7.00017	3.8925	7	3.80905	7.00033	3.61655	7.00033	4.1492
7.0085	7.0826	7.00867	3.9235	7.00867	5.289	7.00833	4.30375	7.0085	3.8025	7.00833	3.74095	7.00867	3.5606	7.00867	4.05415
7.01683	6.39085	7.017	3.86085	7.017	5.19355	7.01667	4.2213	7.01683	3.71595	7.01667	3.67365	7.017	3.50435	7.017	3.96225
7.02517	5.807	7.02533	3.803	7.02533	5.1031	7.025	4.14525	7.02517	3.6375	7.025	3.61185	7.02533	3.453	7.02533	3.87845
7.0335	5.30595	7.03367	3.746	7.03367	5.017	7.03333	4.07025	7.0335	3.5644	7.03333	3.5521	7.03367	3.4028	7.03367	3.79865
7.04183	4.87545	7.042	3.6903	7.042	4.9389	7.04167	4.0018	7.04183	3.49835	7.04167	3.49665	7.042	3.3572	7.042	3.72525
7.05017	4.5053	7.05033	3.63765	7.05033	4.859	7.05	3.93145	7.05017	3.4354	7.05	3.44045	7.05033	3.31015	7.05033	3.65315
7.0585	4.18495	7.05867	3.589	7.05867	4.7837	7.05833	3.868	7.0585	3.3771	7.05833	3.38735	7.05867	3.2657	7.05867	3.5862
7.06683	3.90495	7.067	3.53785	7.067	4.71115	7.06667	3.80525	7.06683	3.32215	7.06667	3.33705	7.067	3.22285	7.067	3.5212
7.07517	3.6588	7.07533	3.49015	7.07533	4.64295	7.075	3.74775	7.07517	3.2724	7.075	3.29075	7.07533	3.1823	7.07533	3.4571
7.0835	3.44345	7.08367	3.44475	7.08367	4.5762	7.08333	3.6938	7.0835	3.227	7.08333	3.2457	7.08367	3.14325	7.08367	3.39675
7.09183	3.2476	7.092	3.39895	7.092	4.51195	7.09167	3.64395	7.09183	3.18405	7.09167	3.20495	7.092	3.10735	7.092	3.3377
7.10017	3.0723	7.10033	3.3533	7.10033	4.44885	7.1	3.5962	7.10017	3.14175	7.1	3.16315	7.10033	3.0709	7.10033	3.28275
7.1085	2.91405	7.10867	3.3117	7.10867	4.3899	7.10833	3.5497	7.1085	3.1035	7.10833	3.1248	7.10867	3.0355	7.10867	3.2285
7.11683	2.78035	7.117	3.27025	7.117	4.3327	7.11667	3.5067	7.11683	3.06565	7.11667	3.0885	7.117	3.00235	7.117	3.18075
7.12517	2.6358	7.12533	3.23	7.12533	4.27835	7.125	3.4652	7.12517	3.02875	7.125	3.0537	7.12533	2.97305	7.12533	3.13525
7.1335	2.5117	7.13367	3.1921	7.13367	4.22455	7.13333	3.4249	7.1335	2.9928	7.13333	3.01795	7.13367	2.9389	7.13367	3.0904
7.14183	2.41335	7.142	3.15725	7.142	4.17325	7.14167	3.38845	7.14183	2.959	7.14167	2.98625	7.142	2.9105	7.142	3.0514
7.15017	2.2951	7.15033	3.1227	7.15033	4.1252	7.15	3.35395	7.15017	2.9259	7.15	2.95445	7.15033	2.88165	7.15033	3.01415
7.1585	2.20635	7.15867	3.08905	7.15867	4.0802	7.15833	3.3215	7.1585	2.8948	7.15833	2.9258	7.15867	2.85455	7.15867	2.98125
7.16683	2.11465	7.167	3.0558	7.167	4.03525	7.16667	3.28725	7.16683	2.86245	7.16667	2.8958	7.167	2.82615	7.167	2.9485
7.17517	2.03205	7.17533	3.0243	7.17533	3.9913	7.175	3.2547	7.17517	2.83155	7.175	2.86885	7.17533	2.79945	7.17533	2.9177
7.1835	1.9564	7.18367	2.99595	7.18367	3.9517	7.18333	3.226	7.1835	2.8028	7.18333	2.84385	7.18367	2.7759	7.18367	2.88915
7.19183	1.8852	7.192	2.96755	7.192	3.9097	7.19167	3.19545	7.19183	2.7748	7.19167	2.819	7.192	2.7502	7.192	2.8607
7.20017	1.8187	7.20033	2.9366	7.20033	3.87105	7.2	3.1665	7.20017	2.7473	7.2	2.79615	7.20033	2.72725	7.20033	2.83635
7.2085	1.7596	7.20867	2.9073	7.20867	3.83365	7.20833	3.1381	7.2085	2.71995	7.20833	2.7738	7.20867	2.70345	7.20867	2.812
7.21683	1.7064	7.217	2.88365	7.217	3.7985	7.21667	3.112	7.21683	2.695	7.21667	2.75485	7.217	2.6812	7.217	2.7924
7.22517	1.65305	7.22533	2.8522	7.22533	3.762	7.225	3.08565	7.22517	2.67125	7.225	2.7343	7.22533	2.65785	7.22533	2.77265
7.2335	1.6078	7.23367	2.82665	7.23367	3.7289	7.23333	3.061	7.2335	2.65035	7.23333	2.7145	7.23367	2.6365	7.23367	2.7567
7.24183	1.5649	7.242	2.80135	7.242	3.69405	7.24167	3.0347	7.24183	2.6285	7.24167	2.69025	7.242	2.6142	7.242	2.74245
7.25017	1.52595	7.25033	2.7789	7.25033	3.6616	7.25	3.0093	7.25017	2.6079	7.25	2.66855	7.25033	2.59365	7.25033	2.7312
7.2585	1.49675	7.25867	2.75365	7.25867	3.6302	7.25833	2.9846	7.2585	2.58865	7.25833	2.6469	7.25867	2.5737	7.25867	2.71845
7.26683	1.4636	7.267	2.73035	7.267	3.598	7.26667	2.96015	7.26683	2.5679	7.26667	2.62245	7.267	2.5537	7.267	2.7049
7.27517	1.4249	7.27533	2.7062	7.27533	3.56805	7.275	2.9369	7.27517	2.5499	7.275	2.60205	7.27533	2.5362	7.27533	2.69225
7.2835	1.40335	7.28367	2.68355	7.28367	3.53685	7.28333	2.9169	7.2835	2.53355	7.28333	2.5796	7.28367	2.51795	7.28367	2.6771
7.29183	1.37565	7.292	2.65975	7.292	3.50795	7.29167	2.8943	7.29183	2.5168	7.29167	2.5588	7.292	2.4982	7.292	2.65655
7.30017	1.35485	7.30033	2.63905	7.30033	3.4794	7.3	2.87635	7.30017	2.50395	7.3	2.54125	7.30033	2.48185	7.30033	2.63845
7.3085	1.33305	7.30867	2.61835	7.30867	3.45125	7.30833	2.8607	7.3085	2.4929	7.30833	2.52775	7.30867	2.4693	7.30867	2.6148
7.31683	1.3121	7.317	2.5951	7.317	3.42565	7.31667	2.84775	7.31683	2.47995	7.31667	2.52175	7.317	2.45465	7.317	2.5884
7.32517	1.29605	7.32533	2.5765	7.32533	3.39955	7.325	2.84055	7.32517	2.47145	7.325	2.5213	7.32533	2.43945	7.32533	2.5634
7.3335	1.27945	7.33367	2.5572	7.33367	3.37515	7.33333	2.83915	7.3335	2.4625	7.33333	2.53145	7.33367	2.4264	7.33367	2.5372
7.34183	1.26295	7.342	2.53875	7.342	3.3503	7.34167	2.8444	7.34183	2.4572	7.34167	2.55475	7.342	2.4155	7.342	2.51455
7.35017	1.2484	7.35033	2.51975	7.35033	3.32835	7.35	2.8606	7.35017	2.45535	7.35	2.59385	7.35033	2.4037	7.35033	2.50145
7.3585	1.23295	7.35867	2.50175	7.35867	3.30705	7.35833	2.8816	7.3585	2.4519	7.35833	2.64355	7.35867	2.39315	7.35867	2.50055
7.36683	1.2207	7.367	2.487	7.367	3.28785	7.36667	2.9111	7.36683	2.45085	7.36667	2.7042	7.367	2.38615	7.367	2.51845
7.37517	1.2041	7.37533	2.4743	7.37533	3.27025	7.375	2.94695	7.37517	2.44885	7.375	2.77005	7.37533	2.37855	7.37533	2.5669
7.3835	1.19155	7.38367	2.4574	7.38367	3.2527	7.38333	2.98165	7.3835	2.4443	7.38333	2.83325	7.38367	2.36725	7.38367	2.65145
7.39183	1.1795	7.392	2.4436	7.392	3.23735	7.39167	3.017	7.39183	2.4392	7.39167	2.88815	7.392	2.3586	7.392	2.78385
7.40017	1.1693	7.40033	2.43185	7.40033	3.22305	7.4	3.04485	7.40017	2.43	7.4	2.9259	7.40033	2.34775	7.40033	2.9646
7.4085	1.15785	7.40867	2.42085	7.40867	3.21145	7.40833	3.06705	7.4085	2.41975	7.40833	2.9463	7.40867	2.33705	7.40867	3.1941
7.41683	1.14715	7.417	2.40915	7.417	3.1998	7.41667	3.076	7.41683	2.404	7.41667	2.94425	7.417	2.32505	7.417	3.46115
7.42517	1.1363	7.42533	2.40015	7.42533	3.1859	7.425	3.074	7.42517	2.38965	7.425	2.9207	7.42533	2.3112	7.42533	3.7503
7.4335	1.12605	7.43367	2.3893	7.43367	3.1711	7.43333	3.06035	7.4335	2.3731	7.43333	2.87905	7.43367	2.29915	7.43367	4.0405
7.44183	1.11995	7.442	2.3778	7.442	3.15915	7.44167	3.03775	7.44183	2.3556	7.44167	2.82745	7.442	2.2861	7.442	4.3102
7.45017	1.09465	7.45033	2.3661	7.45033	3.1423	7.45	3.00545	7.45017	2.3362	7.45	2.7631	7.45033	2.27255	7.45033	4.53105
7.4585	1.1153	7.45867	2.3531	7.45867	3.1237	7.45833	2.96505	7.4585	2.3172	7.45833	2.6964	7.45867	2.25745	7.45867	4.68845
7.46683	1.09275	7.467	2.33915	7.467	3.1062	7.46667	2.92235	7.46683	2.30165	7.46667	2.6306	7.467	2.24325	7.467	4.77535
7.47517	1.08605	7.47533	2.32605	7.47533	3.0879	7.475	2.8751	7.47517	2.28485	7.475	2.56585	7.47533	2.2298	7.47533	4.7874
7.4835	1.08165	7.48367	2.30935	7.48367	3.06855	7.48333	2.82925	7.4835	2.27115	7.48333	2.5059	7.48367	2.21605	7.48367	4.73225
7.49183	1.1104	7.492	2.29755	7.492	3.04895	7.49167	2.78405	7.49183	2.2562	7.49167	2.4518	7.492	2.2049	7.492	4.61865
7.50017	1.06145	7.50033	2.2834	7.50033	3.02975	7.5	2.7395	7.50017	2.2427	7.5	2.40255	7.50033	2.1925	7.50033	4.4578
7.5085	1.0585	7.50867	2.26805	7.50867	3.01255	7.50833	2.6927	7.5085	2.23155	7.50833	2.36135	7.50867	2.18265	7.50867	4.2661
7.51683	1.05295	7.517	2.2534	7.517	2.99215	7.51667	2.66045	7.51683	2.2182	7.51667	2.3219	7.517	2.17105	7.517	4.0537
7.52517	1.0479	7.52533	2.2398	7.52533	2.9756	7.525	2.63155	7.52517	2.20495	7.525	2.288	7.52533	2.15955	7.52533	3.83395
7.5335	1.0391	7.53367	2.2249	7.53367	2.9589	7.53333	2.60165	7.5335	2.19455	7.53333	2.2582	7.53367	2.1477	7.53367	3.6183
7.54183	1.03205	7.542	2.21155	7.542	2.9568	7.54167	2.57535	7.54183	2.18285	7.54167	2.23345	7.542	2.1383	7.542	3.41325
7.55017	1.02515	7.55033	2.19995	7.55033	2.92665	7.55	2.55195	7.55017	2.17295	7.55	2.21155	7.55033	2.1285	7.55033	3.22355
7.5585	1.01805	7.55867	2.18915	7.55867	2.9109	7.55833	2.53115	7.5585	2.16325	7.55833	2.1903	7.55867	2.1221	7.55867	3.0528
7.56683	1.00725	7.567	2.1794	7.567	2.89655	7.56667	2.51415	7.56683	2.1547	7.56667	2.17235	7.567	2.1128	7.567	2.90225
7.57517	0.98115	7.57533	2.1669	7.57533	2.8825	7.575	2.49985	7.57517	2.1441	7.575	2.1563	7.57533	2.10325	7.57533	2.769
7.5835	0.9992	7.58367	2.1557	7.58367	2.86805	7.58333	2.47795	7.5835	2.1353	7.58333	2.14265	7.58367	2.0945	7.58367	2.65585
7.59183	0.9819	7.592	2.1458	7.592	2.8578	7.59167	2.46245	7.59183	2.12885	7.59167	2.13095	7.592	2.08835	7.592	2.5624
7.60017	0.9885	7.60033	2.13545	7.60033	2.84655	7.6	2.4523	7.60017	2.1207	7.6	2.11835	7.60033	2.07795	7.60033	2.4784
7.6085	0.96945	7.60867	2.1266	7.60867	2.83405	7.60833	2.4404	7.6085	2.11295	7.60833	2.10735	7.60867	2.07085	7.60867	2.4094
7.61683	0.97245	7.617	2.11855	7.617	2.82325	7.61667	2.4294	7.61683	2.1063	7.61667	2.0979	7.617	2.0631	7.617	2.3536
7.62517	0.96785	7.62533	2.1111	7.62533	2.8113	7.625	2.41815	7.62517	2.0983	7.625	2.08645	7.62533	2.0561	7.62533	2.3045
7.6335	0.95085	7.63367	2.0996	7.63367	2.8002	7.63333	2.40855	7.6335	2.0907	7.63333	2.07865	7.63367	2.0472	7.63367	2.26275
7.64183	0.9473	7.642	2.0913	7.642	2.7896	7.64167	2.39945	7.64183	2.0843	7.64167	2.0689	7.642	2.0409	7.642	2.22745
7.65017	0.94985	7.65033	2.0842	7.65033	2.779	7.65	2.39005	7.65017	2.07555	7.65	2.0601	7.65033	2.03345	7.65033	2.1977
7.6585	0.9428	7.65867	2.07785	7.65867	2.7683	7.65833	2.38285	7.6585	2.0711	7.65833	2.0522	7.65867	2.0247	7.65867	2.17175
7.66683	0.94165	7.667	2.06495	7.667	2.75675	7.66667	2.37385	7.66683	2.0649	7.66667	2.04425	7.667	2.0185	7.667	2.14875
7.67517	0.93995	7.67533	2.05875	7.67533	2.74685	7.675	2.3656	7.67517	2.05945	7.675	2.03525	7.67533	2.0109	7.67533	2.12965
7.6835	0.93485	7.68367	2.04905	7.68367	2.73595	7.68333	2.357	7.6835	2.0534	7.68333	2.0287	7.68367	2.00605	7.68367	2.11305
7.69183	0.9316	7.692	2.04115	7.692	2.72705	7.69167	2.349	7.69183	2.04765	7.69167	2.02135	7.692	1.99975	7.692	2.0971
7.70017	0.9291	7.70033	2.0344	7.70033	2.7158	7.7	2.33995	7.70017	2.0411	7.7	2.01325	7.70033	1.9909	7.70033	2.08095
7.7085	0.9257	7.70867	2.026	7.70867	2.70525	7.70833	2.3326	7.7085	2.0347	7.70833	2.00615	7.70867	1.98535	7.70867	2.0665
7.71683	0.9223	7.717	2.0185	7.717	2.6968	7.71667	2.3281	7.71683	2.0295	7.71667	1.99855	7.717	1.97955	7.717	2.05545
7.72517	0.9216	7.72533	2.0137	7.72533	2.68535	7.725	2.3182	7.72517	2.0219	7.725	1.98995	7.72533	1.9707	7.72533	2.0402
7.7335	0.9172	7.73367	2.00695	7.73367	2.6772	7.73333	2.3119	7.7335	2.01685	7.73333	1.9849	7.73367	1.9656	7.73367	2.02975
7.74183	0.916	7.742	2.00125	7.742	2.6675	7.74167	2.3041	7.74183	2.01165	7.74167	1.97775	7.742	1.9615	7.742	2.01895
7.75017	0.91355	7.75033	1.99595	7.75033	2.65855	7.75	2.29755	7.75017	2.00795	7.75	1.9702	7.75033	1.9563	7.75033	2.00875
7.7585	0.9116	7.75867	1.9895	7.75867	2.6509	7.75833	2.29225	7.7585	2.0021	7.75833	1.96475	7.75867	1.9511	7.75867	1.99795
7.76683	0.90885	7.767	1.9838	7.767	2.6418	7.76667	2.28695	7.76683	1.99685	7.76667	1.9607	7.767	1.94605	7.767	1.9888
7.77517	0.90575	7.77533	1.98155	7.77533	2.6327	7.775	2.2804	7.77517	1.9925	7.775	1.955	7.77533	1.9408	7.77533	1.9785
7.7835	0.9045	7.78367	1.97905	7.78367	2.6273	7.78333	2.2756	7.7835	1.9882	7.78333	1.94965	7.78367	1.9366	7.78367	1.97025
7.79183	0.90285	7.792	1.97755	7.792	2.6199	7.79167	2.26895	7.79183	1.9833	7.79167	1.94575	7.792	1.9302	7.792	1.9595
7.80017	0.89935	7.80033	1.9778	7.80033	2.61245	7.8	2.2648	7.80017	1.9806	7.8	1.94005	7.80033	1.92445	7.80033	1.9521
7.8085	0.8977	7.80867	1.9796	7.80867	2.6059	7.80833	2.26275	7.8085	1.97575	7.80833	1.93555	7.80867	1.92105	7.80867	1.9462
7.81683	0.8975	7.817	1.98135	7.817	2.5997	7.81667	2.2583	7.81683	1.9726	7.81667	1.9324	7.817	1.9146	7.817	1.94175
7.82517	0.89455	7.82533	1.97985	7.82533	2.59225	7.825	2.2538	7.82517	1.9663	7.825	1.92635	7.82533	1.90905	7.82533	1.9331
7.8335	0.89365	7.83367	1.97895	7.83367	2.58295	7.83333	2.24855	7.8335	1.9603	7.83333	1.91905	7.83367	1.9045	7.83367	1.92875
7.84183	0.89155	7.842	1.9752	7.842	2.57725	7.84167	2.2482	7.84183	1.95745	7.84167	1.916	7.842	1.8998	7.842	1.9272
7.85017	0.8901	7.85033	1.97005	7.85033	2.5692	7.85	2.24175	7.85017	1.9517	7.85	1.90925	7.85033	1.89285	7.85033	1.9246
7.8585	0.89045	7.85867	1.96255	7.85867	2.5621	7.85833	2.23835	7.8585	1.94865	7.85833	1.9053	7.85867	1.88845	7.85867	1.92605
7.86683	0.8896	7.867	1.95605	7.867	2.5567	7.86667	2.2364	7.86683	1.9473	7.86667	1.9025	7.867	1.88745	7.867	1.93065
7.87517	0.8852	7.87533	1.94455	7.87533	2.54865	7.875	2.23105	7.87517	1.9423	7.875	1.89845	7.87533	1.88225	7.87533	1.93385
7.8835	0.8859	7.88367	1.93545	7.88367	2.5438	7.88333	2.226	7.8835	1.9396	7.88333	1.89345	7.88367	1.8779	7.88367	1.9404
7.89183	0.8869	7.892	1.92585	7.892	2.5362	7.89167	2.2207	7.89183	1.935	7.89167	1.8908	7.892	1.8743	7.892	1.94745
7.90017	0.8872	7.90033	1.916	7.90033	2.5286	7.9	2.21385	7.90017	1.93005	7.9	1.88435	7.90033	1.8697	7.90033	1.9536
7.9085	0.8864	7.90867	1.9074	7.90867	2.52085	7.90833	2.20795	7.9085	1.9229	7.90833	1.87925	7.90867	1.86335	7.90867	1.9602
7.91683	0.88725	7.917	1.8972	7.917	2.51565	7.91667	2.2017	7.91683	1.91985	7.91667	1.87645	7.917	1.8599	7.917	1.9681
7.92517	0.886	7.92533	1.88825	7.92533	2.50675	7.925	2.1946	7.92517	1.91285	7.925	1.8709	7.92533	1.8557	7.92533	1.97525
7.9335	0.886	7.93367	1.88265	7.93367	2.50005	7.93333	2.1887	7.9335	1.9068	7.93333	1.86785	7.93367	1.8517	7.93367	1.9853
7.94183	0.8861	7.942	1.8768	7.942	2.4929	7.94167	2.18085	7.94183	1.90055	7.94167	1.8637	7.942	1.84725	7.942	1.9977
7.95017	0.8849	7.95033	1.8674	7.95033	2.4864	7.95	2.17525	7.95017	1.89605	7.95	1.858	7.95033	1.8428	7.95033	2.01395
7.9585	0.88505	7.95867	1.8601	7.95867	2.47895	7.95833	2.1683	7.9585	1.88925	7.95833	1.85255	7.95867	1.83685	7.95867	2.03205
7.96683	0.88435	7.967	1.85185	7.967	2.4717	7.96667	2.1622	7.96683	1.8838	7.96667	1.8464	7.967	1.83215	7.967	2.0548
7.97517	0.88415	7.97533	1.84755	7.97533	2.4666	7.975	2.1561	7.97517	1.8788	7.975	1.8439	7.97533	1.8269	7.97533	2.07965
7.9835	0.88065	7.98367	1.8401	7.98367	2.4604	7.98333	2.1525	7.9835	1.8777	7.98333	1.8404	7.98367	1.82355	7.98367	2.1069
7.99183	0.8803	7.992	1.83555	7.992	2.4526	7.99167	2.1495	7.99183	1.87465	7.99167	1.8359	7.992	1.8186	7.992	2.1299
8.00017	0.87975	8.00033	1.83005	8.00033	2.44735	8	2.1457	8.00017	1.86965	8	1.83185	8.00033	1.8138	8.00033	2.1488
8.0085	0.87785	8.00867	1.8242	8.00867	2.44085	8.00833	2.1444	8.0085	1.86835	8.00833	1.8292	8.00867	1.8114	8.00867	2.1591
8.01683	0.87515	8.017	1.8173	8.017	2.4342	8.01667	2.14255	8.01683	1.8653	8.01667	1.82465	8.017	1.80815	8.017	2.16135
8.02517	0.87725	8.02533	1.8152	8.02533	2.42745	8.025	2.1414	8.02517	1.86295	8.025	1.8213	8.02533	1.8044	8.02533	2.1531
8.0335	0.8739	8.03367	1.8076	8.03367	2.42245	8.03333	2.13895	8.0335	1.8599	8.03333	1.81705	8.03367	1.7999	8.03367	2.1351
8.04183	0.873	8.042	1.8022	8.042	2.41395	8.04167	2.1356	8.04183	1.85555	8.04167	1.8095	8.042	1.7929	8.042	2.10895
8.05017	0.87215	8.05033	1.7976	8.05033	2.40885	8.05	2.13295	8.05017	1.85565	8.05	1.80485	8.05033	1.79095	8.05033	2.0804
8.0585	0.86945	8.05867	1.7927	8.05867	2.40385	8.05833	2.1284	8.0585	1.8523	8.05833	1.80225	8.05867	1.78915	8.05867	2.0512
8.06683	0.87075	8.067	1.7899	8.067	2.39715	8.06667	2.12365	8.06683	1.84675	8.06667	1.7959	8.067	1.78415	8.067	2.01625
8.07517	0.8689	8.07533	1.785	8.07533	2.38995	8.075	2.1184	8.07517	1.8424	8.075	1.79055	8.07533	1.77905	8.07533	1.9829
8.0835	0.86615	8.08367	1.77795	8.08367	2.38405	8.08333	2.11115	8.0835	1.83875	8.08333	1.78645	8.08367	1.77475	8.08367	1.952
8.09183	0.8648	8.092	1.77345	8.092	2.378	8.09167	2.10505	8.09183	1.835	8.09167	1.7815	8.092	1.7697	8.092	1.9223
8.10017	0.86495	8.10033	1.76975	8.10033	2.37325	8.1	2.0976	8.10017	1.8304	8.1	1.7782	8.10033	1.7654	8.10033	1.8961
8.1085	0.86395	8.10867	1.7633	8.10867	2.36915	8.10833	2.09215	8.1085	1.8269	8.10833	1.7754	8.10867	1.76285	8.10867	1.8746
8.11683	0.8612	8.117	1.75915	8.117	2.36245	8.11667	2.0852	8.11683	1.8237	8.11667	1.77045	8.117	1.75885	8.117	1.85355
8.12517	0.86265	8.12533	1.75555	8.12533	2.35445	8.125	2.0782	8.12517	1.8183	8.125	1.765	8.12533	1.7532	8.12533	1.8346
8.1335	0.86195	8.13367	1.7501	8.13367	2.35015	8.13333	2.0723	8.1335	1.8142	8.13333	1.7622	8.13367	1.7505	8.13367	1.8188
8.14183	0.8605	8.142	1.7438	8.142	2.3459	8.14167	2.0677	8.14183	1.81145	8.14167	1.7593	8.142	1.748	8.142	1.8061
8.15017	0.86035	8.15033	1.73905	8.15033	2.33795	8.15	2.061	8.15017	1.80745	8.15	1.75275	8.15033	1.7428	8.15033	1.7913
8.1585	0.8605	8.15867	1.73715	8.15867	2.33485	8.15833	2.05745	8.1585	1.80525	8.15833	1.7527	8.15867	1.7404	8.15867	1.7805
8.16683	0.8608	8.167	1.733	8.167	2.33105	8.16667	2.0525	8.16683	1.8031	8.16667	1.74845	8.167	1.7339	8.167	1.7693
8.17517	0.85895	8.17533	1.72895	8.17533	2.3258	8.175	2.05065	8.17517	1.8024	8.175	1.74535	8.17533	1.7308	8.17533	1.7622
8.1835	0.85985	8.18367	1.72665	8.18367	2.3213	8.18333	2.0473	8.1835	1.80405	8.18333	1.7432	8.18367	1.72715	8.18367	1.7547
8.19183	0.8577	8.192	1.72205	8.192	2.3153	8.19167	2.0504	8.19183	1.8092	8.19167	1.742	8.192	1.72465	8.192	1.74775
8.20017	0.8579	8.20033	1.71835	8.20033	2.3106	8.2	2.05785	8.20017	1.82115	8.2	1.743	8.20033	1.72205	8.20033	1.74145
8.2085	0.85595	8.20867	1.71365	8.20867	2.3067	8.20833	2.0778	8.2085	1.8467	8.20833	1.7488	8.20867	1.7219	8.20867	1.7385
8.21683	0.8561	8.217	1.7112	8.217	2.3014	8.21667	2.1113	8.21683	1.8874	8.21667	1.7578	8.217	1.72425	8.217	1.7339
8.22517	0.8547	8.22533	1.70705	8.22533	2.2972	8.225	2.1661	8.22517	1.95135	8.225	1.77485	8.22533	1.7288	8.22533	1.7296
8.2335	0.8534	8.23367	1.70445	8.23367	2.29455	8.23333	2.2549	8.2335	2.0505	8.23333	1.80415	8.23367	1.73805	8.23367	1.7298
8.24183	0.8525	8.242	1.7018	8.242	2.29335	8.24167	2.3877	8.24183	2.1913	8.24167	1.8504	8.242	1.7555	8.242	1.7322
8.25017	0.8514	8.25033	1.70135	8.25033	2.29445	8.25	2.57305	8.25017	2.3765	8.25	1.9146	8.25033	1.77895	8.25033	1.7393
8.2585	0.8501	8.25867	1.7021	8.25867	2.3014	8.25833	2.8177	8.2585	2.61045	8.25833	2.00045	8.25867	1.81025	8.25867	1.75575
8.26683	0.85065	8.267	1.70705	8.267	2.31465	8.26667	3.12145	8.26683	2.884	8.26667	2.1086	8.267	1.8511	8.267	1.78915
8.27517	0.85085	8.27533	1.7155	8.27533	2.33535	8.275	3.4734	8.27517	3.18365	8.275	2.23355	8.27533	1.90065	8.27533	1.8432
8.2835	0.85105	8.28367	1.73365	8.28367	2.36565	8.28333	3.85015	8.2835	3.48685	8.28333	2.3687	8.28367	1.95195	8.28367	1.93295
8.29183	0.85125	8.292	1.7572	8.292	2.4066	8.29167	4.2265	8.29183	3.75365	8.29167	2.5035	8.292	2.0061	8.292	2.07175
8.30017	0.85105	8.30033	1.78975	8.30033	2.45745	8.3	4.56675	8.30017	3.9877	8.3	2.6277	8.30033	2.05805	8.30033	2.27195
8.3085	0.85125	8.30867	1.8322	8.30867	2.5174	8.30833	4.83885	8.3085	4.2535	8.30833	2.72945	8.30867	2.1024	8.30867	2.55
8.31683	0.8521	8.317	1.8831	8.317	2.5798	8.31667	5.0186	8.31683	4.21515	8.31667	2.79555	8.317	2.13315	8.317	2.90775
8.32517	0.84975	8.32533	1.9378	8.32533	2.64435	8.325	5.0899	8.32517	4.2016	8.325	2.82665	8.32533	2.1477	8.32533	3.34295
8.3335	0.85095	8.33367	1.99085	8.33367	2.6999	8.33333	5.055	8.3335	4.1183	8.33333	2.81765	8.33367	2.14585	8.33367	3.8362
8.34183	0.8533	8.342	2.04205	8.342	2.7465	8.34167	4.92435	8.34183	3.9679	8.34167	2.7756	8.342	2.13145	8.342	4.36135
8.35017	0.8561	8.35033	2.08295	8.35033	2.77465	8.35	4.71845	8.35017	3.7749	8.35	2.703	8.35033	2.10295	8.35033	4.87125
8.3585	0.85995	8.35867	2.11115	8.35867	2.78485	8.35833	4.45955	8.3585	3.56025	8.35833	2.61005	8.35867	2.06485	8.35867	5.32085
8.36683	0.87095	8.367	2.12555	8.367	2.77545	8.36667	4.1782	8.36683	3.33305	8.36667	2.50795	8.367	2.02225	8.367	5.6699
8.37517	0.8838	8.37533	2.1232	8.37533	2.74755	8.375	3.88705	8.37517	3.10225	8.375	2.3992	8.37533	1.97595	8.37533	5.88775
8.3835	0.90485	8.38367	2.10405	8.38367	2.70585	8.38333	3.60675	8.3835	2.8959	8.38333	2.2933	8.38367	1.92935	8.38367	5.9562
8.39183	0.92865	8.392	2.0733	8.392	2.65515	8.39167	3.34585	8.39183	2.7088	8.39167	2.19415	8.392	1.88515	8.392	5.8776
8.40017	0.95515	8.40033	2.0314	8.40033	2.59625	8.4	3.11245	8.40017	2.54425	8.4	2.1029	8.40033	1.84395	8.40033	5.67555
8.4085	0.98595	8.40867	1.9865	8.40867	2.5366	8.40833	2.906	8.4085	2.39855	8.40833	2.0205	8.40867	1.80405	8.40867	5.3729
8.41683	1.0386	8.417	1.93915	8.417	2.4789	8.41667	2.7289	8.41683	2.27405	8.41667	1.9474	8.417	1.7694	8.417	5.00765
8.42517	1.1136	8.42533	1.8936	8.42533	2.42075	8.425	2.57575	8.42517	2.168	8.425	1.8839	8.42533	1.7366	8.42533	4.61145
8.4335	1.1221	8.43367	1.84765	8.43367	2.3697	8.43333	2.44925	8.4335	2.08015	8.43333	1.8309	8.43367	1.71225	8.43367	4.21035
8.44183	1.16115	8.442	1.80605	8.442	2.3195	8.44167	2.3384	8.44183	1.9998	8.44167	1.77935	8.442	1.68195	8.442	3.8206
8.45017	1.1986	8.45033	1.76765	8.45033	2.2755	8.45	2.25005	8.45017	1.93405	8.45	1.7356	8.45033	1.6552	8.45033	3.45825
8.4585	1.19285	8.45867	1.7332	8.45867	2.23645	8.45833	2.1754	8.4585	1.8791	8.45833	1.69785	8.45867	1.63355	8.45867	3.1327
8.46683	1.21685	8.467	1.70275	8.467	2.20235	8.46667	2.11325	8.46683	1.83105	8.46667	1.66595	8.467	1.61315	8.467	2.8472
8.47517	1.1248	8.47533	1.67285	8.47533	2.1715	8.475	2.06445	8.47517	1.79095	8.475	1.6374	8.47533	1.5948	8.47533	2.59985
8.4835	1.12845	8.48367	1.64685	8.48367	2.1466	8.48333	2.02485	8.4835	1.7581	8.48333	1.61505	8.48367	1.5793	8.48367	2.3894
8.49183	1.06405	8.492	1.62445	8.492	2.12815	8.49167	1.99825	8.49183	1.73415	8.49167	1.59695	8.492	1.5702	8.492	2.21825
8.50017	1.0578	8.50033	1.60465	8.50033	2.1125	8.5	1.978	8.50017	1.7149	8.5	1.58425	8.50033	1.561	8.50033	2.07435
8.5085	1.00895	8.50867	1.5848	8.50867	2.10215	8.50833	1.96825	8.5085	1.70085	8.50833	1.57705	8.50867	1.55765	8.50867	1.95885
8.51683	0.967	8.517	1.5672	8.517	2.09595	8.51667	1.96615	8.51683	1.6932	8.51667	1.57395	8.517	1.5553	8.517	1.8685
8.52517	0.93225	8.52533	1.5557	8.52533	2.09395	8.525	1.97245	8.52517	1.6886	8.525	1.57765	8.52533	1.55735	8.52533	1.79865
8.5335	0.90215	8.53367	1.54475	8.53367	2.0941	8.53333	1.98335	8.5335	1.68605	8.53333	1.583	8.53367	1.5599	8.53367	1.743
8.54183	0.8775	8.542	1.5382	8.542	2.0961	8.54167	2.0012	8.54183	1.6865	8.54167	1.58925	8.542	1.5641	8.542	1.70205
8.55017	0.8582	8.55033	1.5334	8.55033	2.0978	8.55	2.0202	8.55017	1.6893	8.55	1.59805	8.55033	1.57075	8.55033	1.67335
8.5585	0.8434	8.55867	1.53295	8.55867	2.10125	8.55833	2.042	8.5585	1.6937	8.55833	1.60695	8.55867	1.57935	8.55867	1.6565
8.56683	0.83435	8.567	1.53445	8.567	2.1044	8.56667	2.0616	8.56683	1.69675	8.56667	1.61555	8.567	1.58705	8.567	1.6455
8.57517	0.8308	8.57533	1.5364	8.57533	2.10675	8.575	2.07845	8.57517	1.69925	8.575	1.6228	8.57533	1.5931	8.57533	1.6386
8.5835	0.8287	8.58367	1.53935	8.58367	2.10995	8.58333	2.09105	8.5835	1.7021	8.58333	1.62765	8.58367	1.60065	8.58367	1.6385
8.59183	0.83735	8.592	1.54315	8.592	2.11205	8.59167	2.09945	8.59183	1.70305	8.59167	1.63195	8.592	1.606	8.592	1.6396
8.60017	0.8372	8.60033	1.5473	8.60033	2.11465	8.6	2.106	8.60017	1.70715	8.6	1.6362	8.60033	1.6125	8.60033	1.6438
8.6085	0.8378	8.60867	1.5502	8.60867	2.11415	8.60833	2.10385	8.6085	1.7068	8.60833	1.6382	8.60867	1.6176	8.60867	1.64645
8.61683	0.84225	8.617	1.554	8.617	2.1158	8.61667	2.10245	8.61683	1.70795	8.61667	1.6405	8.617	1.6223	8.617	1.6518
8.62517	0.8452	8.62533	1.55805	8.62533	2.1152	8.625	2.096	8.62517	1.7072	8.625	1.64075	8.62533	1.62595	8.62533	1.65625
8.6335	0.85115	8.63367	1.5595	8.63367	2.11495	8.63333	2.0893	8.6335	1.7053	8.63333	1.6393	8.63367	1.6241	8.63367	1.6576
8.64183	0.8549	8.642	1.5626	8.642	2.114	8.64167	2.08225	8.64183	1.70385	8.64167	1.63905	8.642	1.6235	8.642	1.6588
8.65017	0.86075	8.65033	1.56485	8.65033	2.1104	8.65	2.07475	8.65017	1.7016	8.65	1.63785	8.65033	1.62395	8.65033	1.66095
8.6585	0.866	8.65867	1.5653	8.65867	2.10985	8.65833	2.0662	8.6585	1.69935	8.65833	1.63595	8.65867	1.6215	8.65867	1.661
8.66683	0.8676	8.667	1.56665	8.667	2.10795	8.66667	2.05935	8.66683	1.6962	8.66667	1.6344	8.667	1.61855	8.667	1.661
8.67517	0.8779	8.67533	1.56425	8.67533	2.1064	8.675	2.0495	8.67517	1.69455	8.675	1.6327	8.67533	1.61815	8.67533	1.65945
8.6835	0.88525	8.68367	1.56715	8.68367	2.1011	8.68333	2.03945	8.6835	1.68975	8.68333	1.62965	8.68367	1.61345	8.68367	1.6566
8.69183	0.8915	8.692	1.56795	8.692	2.0976	8.69167	2.0283	8.69183	1.6865	8.69167	1.6272	8.692	1.61125	8.692	1.65535
8.70017	0.89565	8.70033	1.5657	8.70033	2.0943	8.7	2.01555	8.70017	1.6838	8.7	1.6239	8.70033	1.60695	8.70033	1.65265
8.7085	0.8927	8.70867	1.56475	8.70867	2.0908	8.70833	2.0032	8.7085	1.6806	8.70833	1.6212	8.70867	1.6032	8.70867	1.6497
8.71683	0.90845	8.717	1.563	8.717	2.0872	8.71667	1.98875	8.71683	1.67715	8.71667	1.61735	8.717	1.5982	8.717	1.64775
8.72517	0.9088	8.72533	1.5621	8.72533	2.0849	8.725	1.97625	8.72517	1.672	8.725	1.61455	8.72533	1.59265	8.72533	1.64145
8.7335	0.90895	8.73367	1.55715	8.73367	2.0792	8.73333	1.96305	8.7335	1.6716	8.73333	1.61425	8.73367	1.58845	8.73367	1.63855
8.74183	0.91115	8.742	1.5577	8.742	2.07465	8.74167	1.95315	8.74183	1.66925	8.74167	1.6101	8.742	1.58445	8.742	1.6349
8.75017	0.90905	8.75033	1.5547	8.75033	2.0715	8.75	1.94495	8.75017	1.66715	8.75	1.6069	8.75033	1.58225	8.75033	1.6315
8.7585	0.9076	8.75867	1.5521	8.75867	2.06725	8.75833	1.9376	8.7585	1.6674	8.75833	1.60645	8.75867	1.5789	8.75867	1.6277
8.76683	0.9051	8.767	1.5507	8.767	2.06285	8.76667	1.93285	8.76683	1.6653	8.76667	1.60345	8.767	1.57625	8.767	1.62415
8.77517	0.9021	8.77533	1.5464	8.77533	2.0594	8.775	1.92955	8.77517	1.66595	8.775	1.60175	8.77533	1.57425	8.77533	1.6202
8.7835	0.8978	8.78367	1.54445	8.78367	2.0553	8.78333	1.9303	8.7835	1.66735	8.78333	1.6	8.78367	1.57175	8.78367	1.6185
8.79183	0.8945	8.792	1.5432	8.792	2.0523	8.79167	1.92925	8.79183	1.6668	8.79167	1.59645	8.792	1.5693	8.792	1.61815
8.80017	0.89145	8.80033	1.54075	8.80033	2.04785	8.8	1.9285	8.80017	1.66845	8.8	1.59545	8.80033	1.56665	8.80033	1.6195
8.8085	0.8861	8.80867	1.5388	8.80867	2.04585	8.80833	1.92885	8.8085	1.6694	8.80833	1.59355	8.80867	1.566	8.80867	1.626
8.81683	0.88145	8.817	1.53595	8.817	2.0431	8.81667	1.92685	8.81683	1.66945	8.81667	1.5924	8.817	1.5637	8.817	1.63275
8.82517	0.8777	8.82533	1.53275	8.82533	2.0408	8.825	1.92495	8.82517	1.66795	8.825	1.5907	8.82533	1.5618	8.82533	1.6442
8.8335	0.87515	8.83367	1.53255	8.83367	2.0379	8.83333	1.92215	8.8335	1.66555	8.83333	1.58925	8.83367	1.56025	8.83367	1.6578
8.84183	0.87205	8.842	1.52845	8.842	2.03455	8.84167	1.9191	8.84183	1.66255	8.84167	1.5871	8.842	1.55795	8.842	1.67275
8.85017	0.86815	8.85033	1.5249	8.85033	2.0319	8.85	1.91295	8.85017	1.65835	8.85	1.5853	8.85033	1.555	8.85033	1.6874
8.8585	0.8668	8.85867	1.5236	8.85867	2.03045	8.85833	1.90465	8.8585	1.65445	8.85833	1.58385	8.85867	1.5541	8.85867	1.7007
8.86683	0.8632	8.867	1.52035	8.867	2.02845	8.86667	1.8994	8.86683	1.6498	8.86667	1.58165	8.867	1.55445	8.867	1.71425
8.87517	0.8628	8.87533	1.5194	8.87533	2.0244	8.875	1.88995	8.87517	1.64565	8.875	1.5786	8.87533	1.5515	8.87533	1.72165
8.8835	0.86085	8.88367	1.51745	8.88367	2.0193	8.88333	1.88335	8.8835	1.6412	8.88333	1.5767	8.88367	1.54995	8.88367	1.72325
8.89183	0.8591	8.892	1.51355	8.892	2.0171	8.89167	1.87805	8.89183	1.6386	8.89167	1.5753	8.892	1.5483	8.892	1.72115
8.90017	0.8568	8.90033	1.5106	8.90033	2.01315	8.9	1.8707	8.90017	1.6322	8.9	1.5746	8.90033	1.54725	8.90033	1.7129
8.9085	0.8569	8.90867	1.50935	8.90867	2.0124	8.90833	1.8657	8.9085	1.63135	8.90833	1.57345	8.90867	1.5453	8.90867	1.7028
8.91683	0.85705	8.917	1.5068	8.917	2.0119	8.91667	1.86265	8.91683	1.6298	8.91667	1.57565	8.917	1.54615	8.917	1.68835
8.92517	0.8551	8.92533	1.50655	8.92533	2.011	8.925	1.8593	8.92517	1.6297	8.925	1.57525	8.92533	1.5456	8.92533	1.67435
8.9335	0.85335	8.93367	1.5056	8.93367	2.00825	8.93333	1.856	8.9335	1.6274	8.93333	1.57405	8.93367	1.5453	8.93367	1.65715
8.94183	0.8547	8.942	1.5051	8.942	2.00395	8.94167	1.8531	8.94183	1.6251	8.94167	1.5737	8.942	1.5441	8.942	1.6406
8.95017	0.85195	8.95033	1.50295	8.95033	2.0054	8.95	1.85105	8.95017	1.62535	8.95	1.5744	8.95033	1.54565	8.95033	1.62705
8.9585	0.85275	8.95867	1.5027	8.95867	2.0052	8.95833	1.84975	8.9585	1.6248	8.95833	1.57535	8.95867	1.5434	8.95867	1.61175
8.96683	0.8501	8.967	1.50195	8.967	2.00375	8.96667	1.84895	8.96683	1.62445	8.96667	1.5737	8.967	1.54495	8.967	1.5997
8.97517	0.85095	8.97533	1.50175	8.97533	2.00365	8.975	1.8491	8.97517	1.6233	8.975	1.57295	8.97533	1.5451	8.97533	1.59145
8.9835	0.85035	8.98367	1.50275	8.98367	2.0027	8.98333	1.8472	8.9835	1.6244	8.98333	1.57285	8.98367	1.5442	8.98367	1.5834
8.99183	0.8497	8.992	1.5016	8.992	2.00075	8.99167	1.8467	8.99183	1.6237	8.99167	1.57185	8.992	1.54585	8.992	1.5782
9.00017	0.8501	9.00033	1.50145	9.00033	1.9994	9	1.84575	9.00017	1.6219	9	1.5711	9.00033	1.54605	9.00033	1.57245
9.0085	0.8491	9.00867	1.5014	9.00867	2.00155	9.00833	1.84775	9.0085	1.6218	9.00833	1.57185	9.00867	1.54715	9.00867	1.57135
9.01683	0.84825	9.017	1.5014	9.017	1.99975	9.01667	1.84425	9.01683	1.62085	9.01667	1.56965	9.017	1.5447	9.017	1.5659
9.02517	0.8479	9.02533	1.50075	9.02533	1.99905	9.025	1.84495	9.02517	1.61845	9.025	1.56965	9.02533	1.54555	9.02533	1.5647
9.0335	0.84875	9.03367	1.49965	9.03367	1.99675	9.03333	1.8445	9.0335	1.6181	9.03333	1.56875	9.03367	1.54565	9.03367	1.5616
9.04183	0.8511	9.042	1.49915	9.042	1.9977	9.04167	1.8434	9.04183	1.61695	9.04167	1.5704	9.042	1.54495	9.042	1.56085
9.05017	0.85255	9.05033	1.49955	9.05033	1.99705	9.05	1.8424	9.05017	1.61615	9.05	1.56855	9.05033	1.5466	9.05033	1.55805
9.0585	0.85345	9.05867	1.50165	9.05867	1.99585	9.05833	1.8412	9.0585	1.6148	9.05833	1.56895	9.05867	1.5481	9.05867	1.55765
9.06683	0.8553	9.067	1.4998	9.067	1.99395	9.06667	1.8387	9.06683	1.61315	9.06667	1.56735	9.067	1.5471	9.067	1.5543
9.07517	0.85835	9.07533	1.50015	9.07533	1.99295	9.075	1.8383	9.07517	1.61115	9.075	1.5678	9.07533	1.547	9.07533	1.55455
9.0835	0.85905	9.08367	1.49835	9.08367	1.98965	9.08333	1.83715	9.0835	1.60985	9.08333	1.5656	9.08367	1.54615	9.08367	1.55135
9.09183	0.8585	9.092	1.4967	9.092	1.9883	9.09167	1.83705	9.09183	1.6078	9.09167	1.5648	9.092	1.54495	9.092	1.5495
9.10017	0.8608	9.10033	1.4958	9.10033	1.9868	9.1	1.838	9.10017	1.60575	9.1	1.56485	9.10033	1.54445	9.10033	1.54685
9.1085	0.86415	9.10867	1.49435	9.10867	1.98385	9.10833	1.83945	9.1085	1.605	9.10833	1.56295	9.10867	1.54235	9.10867	1.54565
9.11683	0.86565	9.117	1.4943	9.117	1.9811	9.11667	1.84285	9.11683	1.6045	9.11667	1.56245	9.117	1.5416	9.117	1.5463
9.12517	0.8643	9.12533	1.49015	9.12533	1.9784	9.125	1.8464	9.12517	1.60075	9.125	1.5587	9.12533	1.53925	9.12533	1.5426
9.1335	0.8675	9.13367	1.4888	9.13367	1.9752	9.13333	1.85165	9.1335	1.59935	9.13333	1.559	9.13367	1.5374	9.13367	1.5396
9.14183	0.86875	9.142	1.4862	9.142	1.9704	9.14167	1.85565	9.14183	1.5977	9.14167	1.5549	9.142	1.5339	9.142	1.53645
9.15017	0.8692	9.15033	1.48325	9.15033	1.9683	9.15	1.8612	9.15017	1.595	9.15	1.5523	9.15033	1.53205	9.15033	1.5353
9.1585	0.86995	9.15867	1.47995	9.15867	1.964	9.15833	1.86565	9.1585	1.59175	9.15833	1.54935	9.15867	1.52995	9.15867	1.5319
9.16683	0.8703	9.167	1.47555	9.167	1.95985	9.16667	1.86685	9.16683	1.5902	9.16667	1.5455	9.167	1.52725	9.167	1.53115
9.17517	0.8717	9.17533	1.47415	9.17533	1.95755	9.175	1.8694	9.17517	1.589	9.175	1.5439	9.17533	1.5249	9.17533	1.53215
9.1835	0.8712	9.18367	1.46935	9.18367	1.95475	9.18333	1.8681	9.1835	1.587	9.18333	1.5419	9.18367	1.52225	9.18367	1.53125
9.19183	0.8702	9.192	1.46515	9.192	1.9509	9.19167	1.86445	9.19183	1.58405	9.19167	1.53765	9.192	1.5205	9.192	1.53045
9.20017	0.86965	9.20033	1.46255	9.20033	1.9478	9.2	1.8593	9.20017	1.5806	9.2	1.5351	9.20033	1.518	9.20033	1.5299
9.2085	0.87055	9.20867	1.45995	9.20867	1.9432	9.20833	1.8528	9.2085	1.57795	9.20833	1.5306	9.20867	1.5151	9.20867	1.53005
9.21683	0.8688	9.217	1.4563	9.217	1.9413	9.21667	1.8484	9.21683	1.5758	9.21667	1.5313	9.217	1.5143	9.217	1.53105
9.22517	0.86835	9.22533	1.4537	9.22533	1.94005	9.225	1.8394	9.22517	1.57255	9.225	1.52895	9.22533	1.51185	9.22533	1.52825
9.2335	0.8682	9.23367	1.44965	9.23367	1.93835	9.23333	1.83265	9.2335	1.57125	9.23333	1.5271	9.23367	1.5092	9.23367	1.529
9.24183	0.8672	9.242	1.4485	9.242	1.93495	9.24167	1.8255	9.24183	1.56805	9.24167	1.5257	9.242	1.51065	9.242	1.5274
9.25017	0.86445	9.25033	1.44675	9.25033	1.93285	9.25	1.8187	9.25017	1.5646	9.25	1.52355	9.25033	1.5075	9.25033	1.5243
9.2585	0.8639	9.25867	1.4452	9.25867	1.93205	9.25833	1.8163	9.2585	1.56385	9.25833	1.5236	9.25867	1.50725	9.25867	1.5226
9.26683	0.86165	9.267	1.4434	9.267	1.92965	9.26667	1.81455	9.26683	1.563	9.26667	1.52215	9.267	1.5057	9.267	1.51925
9.27517	0.86135	9.27533	1.44225	9.27533	1.92775	9.275	1.817	9.27517	1.5608	9.275	1.52265	9.27533	1.50435	9.27533	1.5168
9.2835	0.85955	9.28367	1.43945	9.28367	1.9286	9.28333	1.824	9.2835	1.5617	9.28333	1.5252	9.28367	1.50435	9.28367	1.51345
9.29183	0.85725	9.292	1.4381	9.292	1.927	9.29167	1.83385	9.29183	1.56075	9.29167	1.52965	9.292	1.50195	9.292	1.51205
9.30017	0.85475	9.30033	1.43705	9.30033	1.92515	9.3	1.84715	9.30017	1.5609	9.3	1.5315	9.30033	1.5012	9.30033	1.50945
9.3085	0.85535	9.30867	1.4384	9.30867	1.9252	9.30833	1.8677	9.3085	1.56055	9.30833	1.53895	9.30867	1.5008	9.30867	1.5072
9.31683	0.8538	9.317	1.43765	9.317	1.92565	9.31667	1.89165	9.31683	1.56135	9.31667	1.5443	9.317	1.50035	9.317	1.50905
9.32517	0.85125	9.32533	1.43665	9.32533	1.9255	9.325	1.9209	9.32517	1.56525	9.325	1.55415	9.32533	1.50085	9.32533	1.51095
9.3335	0.85105	9.33367	1.4363	9.33367	1.92735	9.33333	1.9489	9.3335	1.5658	9.33333	1.5649	9.33367	1.5016	9.33367	1.51575
9.34183	0.85085	9.342	1.4399	9.342	1.92625	9.34167	1.9769	9.34183	1.56815	9.34167	1.5739	9.342	1.50095	9.342	1.52215
9.35017	0.8529	9.35033	1.44205	9.35033	1.9296	9.35	2.0046	9.35017	1.57415	9.35	1.58565	9.35033	1.50345	9.35033	1.5346
9.3585	0.85305	9.35867	1.44525	9.35867	1.931	9.35833	2.0256	9.3585	1.5775	9.35833	1.59265	9.35867	1.5048	9.35867	1.54995
9.36683	0.853	9.367	1.45035	9.367	1.9347	9.36667	2.04175	9.36683	1.58145	9.36667	1.60055	9.367	1.50855	9.367	1.57195
9.37517	0.85235	9.37533	1.4531	9.37533	1.93825	9.375	2.0465	9.37517	1.58515	9.375	1.60575	9.37533	1.51035	9.37533	1.5969
9.3835	0.8531	9.38367	1.45925	9.38367	1.94025	9.38333	2.04665	9.3835	1.5874	9.38333	1.60825	9.38367	1.51175	9.38367	1.62415
9.39183	0.853	9.392	1.46515	9.392	1.94265	9.39167	2.03895	9.39183	1.5902	9.39167	1.60865	9.392	1.51325	9.392	1.6544
9.40017	0.8551	9.40033	1.46935	9.40033	1.94175	9.4	2.0239	9.40017	1.5897	9.4	1.6044	9.40033	1.5133	9.40033	1.68355
9.4085	0.85465	9.40867	1.47645	9.40867	1.94155	9.40833	2.00485	9.4085	1.5892	9.40833	1.60025	9.40867	1.51375	9.40867	1.7113
9.41683	0.85575	9.417	1.47965	9.417	1.93775	9.41667	1.9801	9.41683	1.58615	9.41667	1.59505	9.417	1.51405	9.417	1.73285
9.42517	0.85395	9.42533	1.482	9.42533	1.9312	9.425	1.95495	9.42517	1.58485	9.425	1.58745	9.42533	1.51455	9.42533	1.75
9.4335	0.85555	9.43367	1.48165	9.43367	1.94245	9.43333	1.92845	9.4335	1.582	9.43333	1.5783	9.43367	1.5138	9.43367	1.7575
9.44183	0.85745	9.442	1.48115	9.442	1.94195	9.44167	1.9034	9.44183	1.5805	9.44167	1.5717	9.442	1.5128	9.442	1.7586
9.45017	0.8562	9.45033	1.47845	9.45033	1.9329	9.45	1.8802	9.45017	1.57655	9.45	1.56515	9.45033	1.5112	9.45033	1.75005
9.4585	0.8576	9.45867	1.47625	9.45867	1.9313	9.45833	1.85935	9.4585	1.5717	9.45833	1.55865	9.45867	1.50875	9.45867	1.73675
9.46683	0.8584	9.467	1.4722	9.467	1.92895	9.46667	1.8418	9.46683	1.568	9.46667	1.55175	9.467	1.50665	9.467	1.71465
9.47517	0.85955	9.47533	1.46645	9.47533	1.92865	9.475	1.8291	9.47517	1.56625	9.475	1.549	9.47533	1.5061	9.47533	1.6932
9.4835	0.86195	9.48367	1.46215	9.48367	1.9247	9.48333	1.81575	9.4835	1.56255	9.48333	1.5441	9.48367	1.5024	9.48367	1.66695
9.49183	0.8635	9.492	1.4589	9.492	1.92175	9.49167	1.80535	9.49183	1.5595	9.49167	1.54225	9.492	1.50105	9.492	1.64055
9.50017	0.866	9.50033	1.45665	9.50033	1.91885	9.5	1.79945	9.50017	1.5573	9.5	1.5387	9.50033	1.49915	9.50033	1.6164
9.5085	0.8683	9.50867	1.4522	9.50867	1.9155	9.50833	1.7934	9.5085	1.5545	9.50833	1.53655	9.50867	1.49645	9.50867	1.5949
9.51683	0.8717	9.517	1.44965	9.517	1.9128	9.51667	1.79035	9.51683	1.55075	9.51667	1.5365	9.517	1.49465	9.517	1.57335
9.52517	0.87235	9.52533	1.4467	9.52533	1.91265	9.525	1.7883	9.52517	1.5503	9.525	1.5357	9.52533	1.49355	9.52533	1.55735
9.5335	0.8729	9.53367	1.4442	9.53367	1.91475	9.53333	1.7892	9.5335	1.55135	9.53333	1.5384	9.53367	1.49485	9.53367	1.5453
9.54183	0.87395	9.542	1.4435	9.542	1.9135	9.54167	1.78955	9.54183	1.5504	9.54167	1.5368	9.542	1.4942	9.542	1.5339
9.55017	0.87635	9.55033	1.4442	9.55033	1.9138	9.55	1.7888	9.55017	1.5532	9.55	1.5363	9.55033	1.49675	9.55033	1.5267
9.5585	0.87545	9.55867	1.4447	9.55867	1.91495	9.55833	1.78975	9.5585	1.55485	9.55833	1.5386	9.55867	1.4989	9.55867	1.52225
9.56683	0.8755	9.567	1.4454	9.567	1.9149	9.56667	1.78815	9.56683	1.55395	9.56667	1.53605	9.567	1.49815	9.567	1.51915
9.57517	0.87405	9.57533	1.44465	9.57533	1.9156	9.575	1.7885	9.57517	1.5553	9.575	1.53895	9.57533	1.49915	9.57533	1.517
9.5835	0.8736	9.58367	1.44445	9.58367	1.9149	9.58333	1.788	9.5835	1.5553	9.58333	1.5406	9.58367	1.4992	9.58367	1.51605
9.59183	0.8739	9.592	1.44595	9.592	1.9165	9.59167	1.79	9.59183	1.55525	9.59167	1.5504	9.592	1.4993	9.592	1.51565
9.60017	0.8748	9.60033	1.4475	9.60033	1.916	9.6	1.79335	9.60017	1.5541	9.6	1.5811	9.60033	1.4986	9.60033	1.5157
9.6085	0.874	9.60867	1.44625	9.60867	1.9184	9.60833	1.80525	9.6085	1.55335	9.60833	1.6399	9.60867	1.49825	9.60867	1.517
9.61683	0.8724	9.617	1.4522	9.617	1.92165	9.61667	1.8346	9.61683	1.5504	9.61667	1.70965	9.617	1.4993	9.617	1.5161
9.62517	0.87285	9.62533	1.47175	9.62533	1.939	9.625	1.8976	9.62517	1.55085	9.625	1.75145	9.62533	1.5007	9.62533	1.51955
9.6335	0.87365	9.63367	1.51525	9.63367	1.97775	9.63333	1.9888	9.6335	1.55115	9.63333	1.76595	9.63367	1.50205	9.63367	1.5242
9.64183	0.8723	9.642	1.5856	9.642	2.04595	9.64167	2.05315	9.64183	1.5499	9.64167	1.76385	9.642	1.5071	9.642	1.5421
9.65017	0.8713	9.65033	1.63905	9.65033	2.10965	9.65	2.08045	9.65017	1.5511	9.65	1.7549	9.65033	1.52455	9.65033	1.5984
9.6585	0.873	9.65867	1.6617	9.65867	2.1416	9.65833	2.0901	9.6585	1.5538	9.65833	1.7461	9.65867	1.5605	9.65867	1.7156
9.66683	0.8721	9.667	1.65895	9.667	2.14675	9.66667	2.0908	9.66683	1.55835	9.66667	1.73305	9.667	1.61575	9.667	1.8737
9.67517	0.8757	9.67533	1.6471	9.67533	2.13755	9.675	2.09545	9.67517	1.5693	9.675	1.684	9.67533	1.65735	9.67533	1.9743
9.6835	0.87655	9.68367	1.631	9.68367	2.1214	9.68333	2.10725	9.6835	1.59035	9.68333	1.7097	9.68367	1.6758	9.68367	2.00055
9.69183	0.87905	9.692	1.61885	9.692	2.111	9.69167	2.09705	9.69183	1.63	9.69167	2.1313	9.692	1.68425	9.692	1.9858
9.70017	0.87965	9.70033	1.5789	9.70033	2.0855	9.7	2.04965	9.70017	1.6889	9.7	2.80865	9.70033	1.67805	9.70033	1.9528
9.7085	0.8825	9.70867	1.5834	9.70867	2.04855	9.70833	2.18495	9.7085	1.73335	9.70833	3.4356	9.70867	1.6707	9.70867	1.92875
9.71683	0.88415	9.717	1.95045	9.717	2.26855	9.71667	2.71745	9.71683	1.74525	9.71667	3.93075	9.717	1.6625	9.717	1.91975
9.72517	0.88595	9.72533	2.60965	9.72533	2.84985	9.725	3.3812	9.72517	1.7407	9.725	4.3025	9.72533	1.6464	9.72533	1.86425
9.7335	0.88765	9.73367	3.24585	9.73367	3.4988	9.73333	3.9478	9.7335	1.73405	9.73333	4.57985	9.73367	1.6022	9.73367	1.86935
9.74183	0.887	9.742	3.7516	9.742	4.0438	9.74167	4.3847	9.74183	1.7312	9.74167	4.82085	9.742	1.6756	9.742	2.27325
9.75017	0.8872	9.75033	4.1364	9.75033	4.45955	9.75	4.71015	9.75017	1.7368	9.75	5.0498	9.75033	2.12695	9.75033	2.9344
9.7585	0.8863	9.75867	4.42125	9.75867	4.7723	9.75833	4.95355	9.7585	1.73455	9.75833	5.2386	9.75867	2.78	9.75867	3.54805
9.76683	0.8871	9.767	4.66195	9.767	5.01965	9.76667	5.17135	9.76683	1.71355	9.76667	5.3735	9.767	3.3751	9.767	4.033
9.77517	0.88805	9.77533	4.8919	9.77533	5.25285	9.775	5.37555	9.77517	1.68245	9.775	5.4597	9.77533	3.8424	9.77533	4.39825
9.7835	0.8945	9.78367	5.09005	9.78367	5.4618	9.78333	5.5381	9.7835	1.6512	9.78333	5.5192	9.78367	4.1971	9.78367	4.67505
9.79183	0.9025	9.792	5.2325	9.792	5.61905	9.79167	5.6483	9.79183	1.73685	9.79167	5.5568	9.792	4.4643	9.792	4.912
9.80017	0.92265	9.80033	5.3276	9.80033	5.72595	9.8	5.7219	9.80017	2.18905	9.8	5.58425	9.80033	4.69975	9.80033	5.1376
9.8085	0.95735	9.80867	5.39115	9.80867	5.7938	9.80833	5.7696	9.8085	2.84405	9.80833	5.60165	9.80867	4.9219	9.80867	5.3276
9.81683	1.002	9.817	5.43465	9.817	5.84125	9.81667	5.80125	9.81683	3.4424	9.81667	5.61675	9.817	5.1085	9.817	5.46295
9.82517	1.02365	9.82533	5.4616	9.82533	5.87345	9.825	5.8212	9.82517	3.90965	9.825	5.6249	9.82533	5.23955	9.82533	5.55245
9.8335	1.0299	9.83367	5.48185	9.83367	5.89385	9.83333	5.83565	9.8335	4.26015	9.83333	5.63155	9.83367	5.32595	9.83367	5.60915
9.84183	1.03445	9.842	5.4968	9.842	5.9092	9.84167	5.84615	9.84183	4.52395	9.84167	5.63425	9.842	5.38365	9.842	5.64605
9.85017	1.03285	9.85033	5.50775	9.85033	5.92105	9.85	5.853	9.85017	4.75035	9.85	5.6372	9.85033	5.42305	9.85033	5.6731
9.8585	1.03255	9.85867	5.51645	9.85867	5.92895	9.85833	5.8576	9.8585	4.96295	9.85833	5.6386	9.85867	5.449	9.85867	5.693
9.86683	1.02735	9.867	5.52525	9.867	5.9338	9.86667	5.85865	9.86683	5.13625	9.86667	5.6375	9.867	5.46685	9.867	5.70565
9.87517	1.0031	9.87533	5.52545	9.87533	5.93625	9.875	5.85805	9.87517	5.25585	9.875	5.63715	9.87533	5.4807	9.87533	5.71645
9.8835	0.9513	9.88367	5.5267	9.88367	5.93685	9.88333	5.857	9.8835	5.3346	9.88333	5.6333	9.88367	5.4892	9.88367	5.7209
9.89183	1.00515	9.892	5.5279	9.892	5.93675	9.89167	5.85385	9.89183	5.38545	9.89167	5.63305	9.892	5.4958	9.892	5.725
9.90017	1.4366	9.90033	5.52685	9.90033	5.93625	9.9	5.8528	9.90017	5.42	9.9	5.63155	9.90033	5.49935	9.90033	5.729
9.9085	2.0929	9.90867	5.52615	9.90867	5.9347	9.90833	5.8512	9.9085	5.4426	9.90833	5.63085	9.90867	5.5019	9.90867	5.73145
9.91683	2.69075	9.917	5.52345	9.917	5.9315	9.91667	5.84605	9.91683	5.45775	9.91667	5.62695	9.917	5.4996	9.917	5.7301
9.92517	3.16235	9.92533	5.5226	9.92533	5.9285	9.925	5.844	9.92517	5.4683	9.925	5.6265	9.92533	5.4989	9.92533	5.7302
9.9335	3.5156	9.93367	5.5215	9.93367	5.92385	9.93333	5.84	9.9335	5.47355	9.93333	5.62345	9.93367	5.4978	9.93367	5.72975
9.94183	3.78495	9.942	5.51965	9.942	5.9154	9.94167	5.8381	9.94183	5.4776	9.94167	5.62265	9.942	5.4934	9.942	5.7283
9.95017	4.01985	9.95033	5.5194	9.95033	5.92585	9.95	5.83455	9.95017	5.47745	9.95	5.6192	9.95033	5.49085	9.95033	5.7269
9.9585	4.2412	9.95867	5.5189	9.95867	5.9437	9.95833	5.8336	9.9585	5.47715	9.95833	5.61875	9.95867	5.4908	9.95867	5.72655
9.96683	4.4264	9.967	5.5184	9.967	5.9181	9.96667	5.8293	9.96683	5.47215	9.96667	5.61505	9.967	5.4871	9.967	5.72385
9.97517	4.56055	9.97533	5.5166	9.97533	5.91395	9.975	5.82705	9.97517	5.467	9.975	5.61395	9.97533	5.48545	9.97533	5.7239
9.9835	4.6496	9.98367	5.51525	9.98367	5.9124	9.98333	5.8234	9.9835	5.4609	9.98333	5.6091	9.98367	5.4836	9.98367	5.72305
9.99183	4.7081	9.992	5.51525	9.992	5.9089	9.99167	5.81775	9.99183	5.45325	9.99167	5.60325	9.992	5.48205	9.992	5.71745
10.0002	4.7498	10.0003	5.51395	10.0003	5.9046	10	5.81235	10.0002	5.4462	10	5.5984	10.0003	5.4803	10.0003	5.7155
10.0085	4.77575	10.0087	5.5102	10.0087	5.90285	10.0083	5.808	10.0085	5.4419	10.0083	5.5948	10.0087	5.4803	10.0087	5.7143
10.0168	4.79715	10.017	5.50815	10.017	5.89775	10.0167	5.8021	10.0168	5.4356	10.0167	5.5882	10.017	5.47765	10.017	5.7118
10.0252	4.81185	10.0253	5.5055	10.0253	5.89385	10.025	5.79655	10.0252	5.42975	10.025	5.5833	10.0253	5.4742	10.0253	5.7078
10.0335	4.82185	10.0337	5.50095	10.0337	5.8905	10.0333	5.78975	10.0335	5.4251	10.0333	5.57765	10.0337	5.4723	10.0337	5.70445
10.0418	4.8243	10.042	5.498	10.042	5.88435	10.0417	5.78035	10.0418	5.4193	10.0417	5.5693	10.042	5.4659	10.042	5.698
10.0502	4.8295	10.0503	5.4937	10.0503	5.88065	10.05	5.7748	10.0502	5.41805	10.05	5.5643	10.0503	5.4639	10.0503	5.6946
10.0585	4.8308	10.0587	5.4894	10.0587	5.8748	10.0583	5.7672	10.0585	5.4141	10.0583	5.5583	10.0587	5.4599	10.0587	5.69155
10.0668	4.8316	10.067	5.48425	10.067	5.86985	10.0667	5.76065	10.0668	5.4108	10.0667	5.5522	10.067	5.45475	10.067	5.68715
10.0752	4.83005	10.0753	5.47805	10.0753	5.8636	10.075	5.75245	10.0752	5.40615	10.075	5.54355	10.0753	5.45105	10.0753	5.6807
10.0835	4.8278	10.0837	5.47425	10.0837	5.8582	10.0833	5.74555	10.0835	5.4017	10.0833	5.53745	10.0837	5.4464	10.0837	5.6774
10.0918	4.8236	10.092	5.467	10.092	5.8517	10.0917	5.73725	10.0918	5.39755	10.0917	5.53035	10.092	5.4393	10.092	5.6716
10.1002	4.8211	10.1003	5.4601	10.1003	5.84355	10.1	5.72885	10.1002	5.393	10.1	5.52265	10.1003	5.4334	10.1003	5.66445
10.1085	4.8218	10.1087	5.456	10.1087	5.8376	10.1083	5.7197	10.1085	5.3898	10.1083	5.5152	10.1087	5.42655	10.1087	5.6589
10.1168	4.8216	10.117	5.4482	10.117	5.8314	10.1167	5.71	10.1168	5.38305	10.1167	5.5091	10.117	5.4215	10.117	5.65505
10.1252	4.81675	10.1253	5.44115	10.1253	5.82455	10.125	5.70335	10.1252	5.37805	10.125	5.5012	10.1253	5.4156	10.1253	5.64845
10.1335	4.8147	10.1337	5.4311	10.1337	5.8158	10.1333	5.69165	10.1335	5.37115	10.1333	5.48875	10.1337	5.40745	10.1337	5.642
10.1418	4.81425	10.142	5.42405	10.142	5.80845	10.1417	5.68465	10.1418	5.3646	10.1417	5.4802	10.142	5.40115	10.142	5.6357
10.1502	4.8121	10.1503	5.415	10.1503	5.8019	10.15	5.6771	10.1502	5.3582	10.15	5.4709	10.1503	5.3945	10.1503	5.62855
10.1585	4.81165	10.1587	5.4057	10.1587	5.7949	10.1583	5.6675	10.1585	5.3496	10.1583	5.46415	10.1587	5.38695	10.1587	5.62165
10.1668	4.8071	10.167	5.39225	10.167	5.7846	10.1667	5.6577	10.1668	5.34115	10.1667	5.45425	10.167	5.37835	10.167	5.61215
10.1752	4.8059	10.1753	5.38195	10.1753	5.77455	10.175	5.6478	10.1752	5.33315	10.175	5.4439	10.1753	5.37225	10.1753	5.60445
10.1835	4.80255	10.1837	5.3721	10.1837	5.76155	10.1833	5.6379	10.1835	5.32395	10.1833	5.43185	10.1837	5.3645	10.1837	5.59495
10.1918	4.7951	10.192	5.36035	10.192	5.75	10.1917	5.62675	10.1918	5.31465	10.1917	5.42105	10.192	5.35615	10.192	5.5851
10.2002	4.79365	10.2003	5.343	10.2003	5.73745	10.2	5.61605	10.2002	5.30545	10.2	5.408	10.2003	5.3482	10.2003	5.57315
10.2085	4.7883	10.2087	5.33055	10.2087	5.72695	10.2083	5.60645	10.2085	5.297	10.2083	5.39675	10.2087	5.34085	10.2087	5.56415
10.2168	4.7817	10.217	5.3175	10.217	5.712	10.2167	5.59545	10.2168	5.28625	10.2167	5.3833	10.217	5.331	10.217	5.55275
10.2252	4.778	10.2253	5.302	10.2253	5.69965	10.225	5.5834	10.2252	5.2758	10.225	5.3704	10.2253	5.3222	10.2253	5.53825
10.2335	4.77105	10.2337	5.2873	10.2337	5.68615	10.2333	5.57025	10.2335	5.2668	10.2333	5.35685	10.2337	5.31435	10.2337	5.52635
10.2418	4.76585	10.242	5.27285	10.242	5.6718	10.2417	5.5589	10.2418	5.25785	10.2417	5.3439	10.242	5.30525	10.242	5.5143
10.2502	4.75905	10.2503	5.25685	10.2503	5.65475	10.25	5.5468	10.2502	5.24485	10.25	5.3273	10.2503	5.2947	10.2503	5.5
10.2585	4.7509	10.2587	5.24195	10.2587	5.6391	10.2583	5.5329	10.2585	5.23405	10.2583	5.3131	10.2587	5.28385	10.2587	5.4854
10.2668	4.74265	10.267	5.2256	10.267	5.62415	10.2667	5.5196	10.2668	5.2232	10.2667	5.29655	10.267	5.274	10.267	5.4702
10.2752	4.73935	10.2753	5.21125	10.2753	5.6092	10.275	5.5054	10.2752	5.21245	10.275	5.28165	10.2753	5.26185	10.2753	5.4543
10.2835	4.72705	10.2837	5.19675	10.2837	5.5899	10.2833	5.48945	10.2835	5.2001	10.2833	5.2649	10.2837	5.24805	10.2837	5.439
10.2918	4.7207	10.292	5.18185	10.292	5.57185	10.2917	5.4716	10.2918	5.188	10.2917	5.2452	10.292	5.2338	10.292	5.4233
10.3002	4.7149	10.3003	5.1662	10.3003	5.55705	10.3	5.45605	10.3002	5.17625	10.3	5.2312	10.3003	5.22105	10.3003	5.4085
10.3085	4.70635	10.3087	5.1533	10.3087	5.54115	10.3083	5.44065	10.3085	5.16325	10.3083	5.21545	10.3087	5.2095	10.3087	5.39505
10.3168	4.6976	10.317	5.13725	10.317	5.526	10.3167	5.42265	10.3168	5.1508	10.3167	5.19835	10.317	5.19565	10.317	5.3779
10.3252	4.69195	10.3253	5.1227	10.3253	5.50945	10.325	5.4052	10.3252	5.13575	10.325	5.18135	10.3253	5.1783	10.3253	5.36175
10.3335	4.6809	10.3337	5.1053	10.3337	5.4921	10.3333	5.38595	10.3335	5.1199	10.3333	5.1645	10.3337	5.16165	10.3337	5.3437
10.3418	4.67455	10.342	5.09265	10.342	5.47675	10.3417	5.3715	10.3418	5.1089	10.3417	5.1481	10.342	5.1475	10.342	5.33095
10.3502	4.66675	10.3503	5.07955	10.3503	5.46205	10.35	5.35215	10.3502	5.0954	10.35	5.1309	10.3503	5.1304	10.3503	5.31465
10.3585	4.65675	10.3587	5.06185	10.3587	5.4455	10.3583	5.3344	10.3585	5.0816	10.3583	5.1156	10.3587	5.11515	10.3587	5.2986
10.3668	4.64785	10.367	5.0481	10.367	5.4296	10.3667	5.31835	10.3668	5.06745	10.3667	5.0993	10.367	5.09975	10.367	5.2836
10.3752	4.6409	10.3753	5.03605	10.3753	5.412	10.375	5.2989	10.3752	5.0528	10.375	5.0817	10.3753	5.0827	10.3753	5.26675
10.3835	4.6313	10.3837	5.02035	10.3837	5.39745	10.3833	5.28065	10.3835	5.03905	10.3833	5.0659	10.3837	5.065	10.3837	5.25195
10.3918	4.62205	10.392	5.0046	10.392	5.3798	10.3917	5.26225	10.3918	5.0236	10.3917	5.0491	10.392	5.04795	10.392	5.2332
10.4002	4.6113	10.4003	4.98985	10.4003	5.36485	10.4	5.2453	10.4002	5.0101	10.4	5.03235	10.4003	5.0316	10.4003	5.21895
10.4085	4.59995	10.4087	4.9758	10.4087	5.34825	10.4083	5.2263	10.4085	4.99585	10.4083	5.0157	10.4087	5.01425	10.4087	5.20335
10.4168	4.58985	10.417	4.96055	10.417	5.3349	10.4167	5.20985	10.4168	4.98295	10.4167	5.00105	10.417	4.9978	10.417	5.187
10.4252	4.5793	10.4253	4.9449	10.4253	5.31625	10.425	5.1925	10.4252	4.96635	10.425	4.98365	10.4253	4.97945	10.4253	5.17165
10.4335	4.5686	10.4337	4.9318	10.4337	5.3009	10.4333	5.174	10.4335	4.95365	10.4333	4.96705	10.4337	4.9637	10.4337	5.15565
10.4418	4.5551	10.442	4.9146	10.442	5.2843	10.4417	5.15665	10.4418	4.93775	10.4417	4.9496	10.442	4.94605	10.442	5.1393
10.4502	4.54315	10.4503	4.8998	10.4503	5.26885	10.45	5.1393	10.4502	4.92335	10.45	4.93405	10.4503	4.92835	10.4503	5.12345
10.4585	4.5295	10.4587	4.8823	10.4587	5.25075	10.4583	5.121	10.4585	4.90545	10.4583	4.91545	10.4587	4.91115	10.4587	5.1058
10.4668	4.5148	10.467	4.8659	10.467	5.23535	10.4667	5.10485	10.4668	4.89155	10.4667	4.9	10.467	4.89655	10.467	5.09035
10.4752	4.5011	10.4753	4.8482	10.4753	5.21725	10.475	5.0877	10.4752	4.87515	10.475	4.8829	10.4753	4.87815	10.4753	5.07475
10.4835	4.48875	10.4837	4.8319	10.4837	5.1997	10.4833	5.0676	10.4835	4.858	10.4833	4.86285	10.4837	4.8615	10.4837	5.0565
10.4918	4.4754	10.492	4.81595	10.492	5.18145	10.4917	5.05115	10.4918	4.84135	10.4917	4.8465	10.492	4.84545	10.492	5.0421
10.5002	4.45825	10.5003	4.79705	10.5003	5.16425	10.5	5.0335	10.5002	4.8239	10.5	4.8291	10.5003	4.8291	10.5003	5.02415
10.5085	4.4412	10.5087	4.77965	10.5087	5.14735	10.5083	5.01485	10.5085	4.80415	10.5083	4.81225	10.5087	4.8117	10.5087	5.0072
10.5168	4.4274	10.517	4.7627	10.517	5.12925	10.5167	4.9974	10.5168	4.7847	10.5167	4.79375	10.517	4.7937	10.517	4.9914
10.5252	4.41075	10.5253	4.7467	10.5253	5.1104	10.525	4.9793	10.5252	4.76495	10.525	4.7743	10.5253	4.7765	10.5253	4.9722
10.5335	4.3921	10.5337	4.72695	10.5337	5.09375	10.5333	4.9623	10.5335	4.7455	10.5333	4.75605	10.5337	4.7591	10.5337	4.95395
10.5418	4.37815	10.542	4.71015	10.542	5.07585	10.5417	4.9424	10.5418	4.72395	10.5417	4.7369	10.542	4.74085	10.542	4.9367
10.5502	4.36125	10.5503	4.6915	10.5503	5.0586	10.55	4.92485	10.5502	4.7029	10.55	4.7183	10.5503	4.72355	10.5503	4.9191
10.5585	4.34505	10.5587	4.6756	10.5587	5.04045	10.5583	4.90515	10.5585	4.6831	10.5583	4.69865	10.5587	4.7066	10.5587	4.90005
10.5668	4.32845	10.567	4.6574	10.567	5.02255	10.5667	4.88635	10.5668	4.66035	10.5667	4.68095	10.567	4.68835	10.567	4.88205
10.5752	4.3116	10.5753	4.6385	10.5753	5.00435	10.575	4.86535	10.5752	4.6395	10.575	4.66085	10.5753	4.67075	10.5753	4.86395
10.5835	4.2934	10.5837	4.6182	10.5837	4.9856	10.5833	4.8459	10.5835	4.6182	10.5833	4.64055	10.5837	4.65145	10.5837	4.8451
10.5918	4.27815	10.592	4.6005	10.592	4.9676	10.5917	4.825	10.5918	4.59505	10.5917	4.6222	10.592	4.63135	10.592	4.8266
10.6002	4.2608	10.6003	4.58075	10.6003	4.94915	10.6	4.8033	10.6002	4.5713	10.6	4.6018	10.6003	4.61175	10.6003	4.80785
10.6085	4.25065	10.6087	4.5635	10.6087	4.92945	10.6083	4.7818	10.6085	4.5488	10.6083	4.58145	10.6087	4.59125	10.6087	4.7897
10.6168	4.22835	10.617	4.5447	10.617	4.9102	10.6167	4.76035	10.6168	4.5249	10.6167	4.55975	10.617	4.57065	10.617	4.77055
10.6252	4.2024	10.6253	4.52615	10.6253	4.89075	10.625	4.7389	10.6252	4.4991	10.625	4.53855	10.6253	4.551	10.6253	4.7527
10.6335	4.18475	10.6337	4.5074	10.6337	4.87025	10.6333	4.71655	10.6335	4.4755	10.6333	4.5191	10.6337	4.53045	10.6337	4.7344
10.6418	4.1703	10.642	4.48615	10.642	4.8495	10.6417	4.6931	10.6418	4.4488	10.6417	4.497	10.642	4.50865	10.642	4.71305
10.6502	4.13805	10.6503	4.46795	10.6503	4.8294	10.65	4.66875	10.6502	4.42365	10.65	4.4735	10.6503	4.4881	10.6503	4.6951
10.6585	4.14025	10.6587	4.44745	10.6587	4.81105	10.6583	4.6458	10.6585	4.39645	10.6583	4.4516	10.6587	4.4668	10.6587	4.67605
10.6668	4.14015	10.667	4.42675	10.667	4.78765	10.6667	4.6207	10.6668	4.3691	10.6667	4.4266	10.667	4.44315	10.667	4.6548
10.6752	4.12075	10.6753	4.4049	10.6753	4.7647	10.675	4.5933	10.6752	4.34165	10.675	4.4027	10.6753	4.41955	10.6753	4.6351
10.6835	4.08285	10.6837	4.38365	10.6837	4.7437	10.6833	4.56815	10.6835	4.31515	10.6833	4.37755	10.6837	4.39735	10.6837	4.6138
10.6918	4.05675	10.692	4.3626	10.692	4.7196	10.6917	4.5401	10.6918	4.2847	10.6917	4.3522	10.692	4.37365	10.692	4.59265
10.7002	4.0533	10.7003	4.3394	10.7003	4.69575	10.7	4.51335	10.7002	4.2567	10.7	4.3272	10.7003	4.34915	10.7003	4.572
10.7085	4.0389	10.7087	4.31605	10.7087	4.6734	10.7083	4.4855	10.7085	4.2288	10.7083	4.30205	10.7087	4.3248	10.7087	4.55015
10.7168	4.02195	10.717	4.2926	10.717	4.64845	10.7167	4.4576	10.7168	4.1984	10.7167	4.2745	10.717	4.30005	10.717	4.5277
10.7252	4.0063	10.7253	4.27125	10.7253	4.6254	10.725	4.4293	10.7252	4.1691	10.725	4.24865	10.7253	4.2742	10.7253	4.50475
10.7335	3.98625	10.7337	4.24555	10.7337	4.6011	10.7333	4.39885	10.7335	4.1381	10.7333	4.22205	10.7337	4.2488	10.7337	4.4809
10.7418	3.9705	10.742	4.2235	10.742	4.57445	10.7417	4.36935	10.7418	4.1074	10.7417	4.1927	10.742	4.2241	10.742	4.4561
10.7502	3.95155	10.7503	4.19935	10.7503	4.54945	10.75	4.3394	10.7502	4.0778	10.75	4.16455	10.7503	4.198	10.7503	4.4311
10.7585	3.9321	10.7587	4.171	10.7587	4.5223	10.7583	4.3083	10.7585	4.04695	10.7583	4.13655	10.7587	4.16875	10.7587	4.406
10.7668	3.9119	10.767	4.14475	10.767	4.4963	10.7667	4.2798	10.7668	4.01635	10.7667	4.1085	10.767	4.1431	10.767	4.3826
10.7752	3.8949	10.7753	4.12115	10.7753	4.4697	10.775	4.2487	10.7752	3.9849	10.775	4.07985	10.7753	4.11515	10.7753	4.35745
10.7835	3.87575	10.7837	4.09295	10.7837	4.44135	10.7833	4.21695	10.7835	3.9527	10.7833	4.05035	10.7837	4.0851	10.7837	4.32855
10.7918	3.8564	10.792	4.06545	10.792	4.414	10.7917	4.18465	10.7918	3.92135	10.7917	4.0203	10.792	4.0569	10.792	4.30165
10.8002	3.8361	10.8003	4.03695	10.8003	4.3852	10.8	4.15315	10.8002	3.89045	10.8	3.99225	10.8003	4.0286	10.8003	4.27525
10.8085	3.81585	10.8087	4.0099	10.8087	4.355	10.8083	4.11975	10.8085	3.85615	10.8083	3.9598	10.8087	3.99745	10.8087	4.246
10.8168	3.79385	10.817	3.97985	10.817	4.32655	10.8167	4.089	10.8168	3.82415	10.8167	3.9295	10.817	3.9697	10.817	4.22025
10.8252	3.7741	10.8253	3.9507	10.8253	4.2938	10.825	4.05525	10.8252	3.79035	10.825	3.89835	10.8253	3.93885	10.8253	4.1891
10.8335	3.7516	10.8337	3.91965	10.8337	4.26335	10.8333	4.0218	10.8335	3.7567	10.8333	3.8664	10.8337	3.90725	10.8337	4.1595
10.8418	3.73035	10.842	3.89125	10.842	4.2336	10.8417	3.99095	10.8418	3.726	10.8417	3.83705	10.842	3.8783	10.842	4.1315
10.8502	3.70725	10.8503	3.8586	10.8503	4.2007	10.85	3.95665	10.8502	3.6909	10.85	3.80305	10.8503	3.84535	10.8503	4.0983
10.8585	3.68335	10.8587	3.82575	10.8587	4.16815	10.8583	3.9216	10.8585	3.6564	10.8583	3.76955	10.8587	3.8139	10.8587	4.06705
10.8668	3.66105	10.867	3.79565	10.867	4.1392	10.8667	3.8889	10.8668	3.62505	10.8667	3.73965	10.867	3.78495	10.867	4.0396
10.8752	3.63585	10.8753	3.76445	10.8753	4.10655	10.875	3.85395	10.8752	3.58975	10.875	3.70675	10.8753	3.75345	10.8753	4.00665
10.8835	3.612	10.8837	3.73385	10.8837	4.0727	10.8833	3.82	10.8835	3.5555	10.8833	3.67365	10.8837	3.7209	10.8837	3.973
10.8918	3.58575	10.892	3.7002	10.892	4.04205	10.8917	3.78535	10.8918	3.5195	10.8917	3.64085	10.892	3.6879	10.892	3.94245
10.9002	3.55815	10.9003	3.66645	10.9003	4.0118	10.9	3.75395	10.9002	3.4866	10.9	3.6088	10.9003	3.6591	10.9003	3.9116
10.9085	3.5323	10.9087	3.6336	10.9087	3.9783	10.9083	3.71865	10.9085	3.45125	10.9083	3.5747	10.9087	3.62465	10.9087	3.8781
10.9168	3.50595	10.917	3.6001	10.917	3.9463	10.9167	3.68385	10.9168	3.41515	10.9167	3.54295	10.917	3.5919	10.917	3.84345
10.9252	3.47865	10.9253	3.56735	10.9253	3.91415	10.925	3.6504	10.9252	3.3808	10.925	3.51165	10.9253	3.5619	10.9253	3.81235
10.9335	3.4527	10.9337	3.5372	10.9337	3.8814	10.9333	3.6154	10.9335	3.3448	10.9333	3.4779	10.9337	3.52935	10.9337	3.77955
10.9418	3.4245	10.942	3.50515	10.942	3.85	10.9417	3.5803	10.9418	3.30985	10.9417	3.4454	10.942	3.4974	10.942	3.7466
10.9502	3.3975	10.9503	3.47095	10.9503	3.81655	10.95	3.5455	10.9502	3.27545	10.95	3.411	10.9503	3.46605	10.9503	3.71285
10.9585	3.36775	10.9587	3.43845	10.9587	3.7855	10.9583	3.51105	10.9585	3.2403	10.9583	3.3787	10.9587	3.43455	10.9587	3.6823
10.9668	3.34035	10.967	3.40605	10.967	3.75365	10.9667	3.4765	10.9668	3.206	10.9667	3.34715	10.967	3.4015	10.967	3.64885
10.9752	3.31085	10.9753	3.3722	10.9753	3.7211	10.975	3.44195	10.9752	3.1712	10.975	3.31465	10.9753	3.36975	10.9753	3.6155
10.9835	3.28195	10.9837	3.3379	10.9837	3.68745	10.9833	3.40585	10.9835	3.13635	10.9833	3.2806	10.9837	3.33645	10.9837	3.5826
10.9918	3.2539	10.992	3.30545	10.992	3.65405	10.9917	3.36995	10.9918	3.10105	10.9917	3.2467	10.992	3.3038	10.992	3.54965
11.0002	3.2231	11.0003	3.272	11.0003	3.6208	11	3.3369	11.0002	3.0668	11	3.21325	11.0003	3.27145	11.0003	3.51705
11.0085	3.1952	11.0087	3.2386	11.0087	3.58795	11.0083	3.3022	11.0085	3.0321	11.0083	3.1792	11.0087	3.23795	11.0087	3.4822
11.0168	3.16615	11.017	3.20525	11.017	3.5551	11.0167	3.2671	11.0168	2.9968	11.0167	3.14555	11.017	3.2046	11.017	3.4492
11.0252	3.1361	11.0253	3.17295	11.0253	3.5218	11.025	3.23185	11.0252	2.962	11.025	3.11275	11.0253	3.1715	11.0253	3.416
11.0335	3.10595	11.0337	3.1381	11.0337	3.4884	11.0333	3.19735	11.0335	2.92605	11.0333	3.07755	11.0337	3.13765	11.0337	3.3813
11.0418	3.0768	11.042	3.10445	11.042	3.45475	11.0417	3.1632	11.0418	2.8921	11.0417	3.0433	11.042	3.10345	11.042	3.34905
11.0502	3.04735	11.0503	3.0714	11.0503	3.4215	11.05	3.1281	11.0502	2.85855	11.05	3.0099	11.0503	3.07105	11.0503	3.31585
11.0585	3.0161	11.0587	3.03745	11.0587	3.38675	11.0583	3.0933	11.0585	2.8243	11.0583	2.9748	11.0587	3.03835	11.0587	3.283
11.0668	2.98335	11.067	3.00365	11.067	3.35525	11.0667	3.0612	11.0668	2.7905	11.0667	2.9428	11.067	3.0074	11.067	3.2505
11.0752	2.95375	11.0753	2.9701	11.0753	3.3198	11.075	3.0238	11.0752	2.75435	11.075	2.90805	11.0753	2.9718	11.0753	3.2153
11.0835	2.9227	11.0837	2.93685	11.0837	3.28735	11.0833	2.9918	11.0835	2.7198	11.0833	2.8742	11.0837	2.93955	11.0837	3.18145
11.0918	2.8896	11.092	2.90065	11.092	3.25545	11.0917	2.9562	11.0918	2.68385	11.0917	2.8401	11.092	2.90605	11.092	3.1477
11.1002	2.8571	11.1003	2.86745	11.1003	3.2194	11.1	2.92275	11.1002	2.64895	11.1	2.80455	11.1003	2.87255	11.1003	3.11185
11.1085	2.82275	11.1087	2.8317	11.1087	3.1881	11.1083	2.89075	11.1085	2.6162	11.1083	2.77155	11.1087	2.8406	11.1087	3.0789
11.1168	2.79	11.117	2.79995	11.117	3.14975	11.1167	2.85475	11.1168	2.57915	11.1167	2.7368	11.117	2.8061	11.117	3.0433
11.1252	2.757	11.1253	2.7685	11.1253	3.1197	11.125	2.8224	11.1252	2.5449	11.125	2.7027	11.1253	2.7743	11.1253	3.0087
11.1335	2.7238	11.1337	2.7348	11.1337	3.08315	11.1333	2.7887	11.1335	2.51065	11.1333	2.6683	11.1337	2.74065	11.1337	2.97425
11.1418	2.68865	11.142	2.70015	11.142	3.05065	11.1417	2.75795	11.1418	2.4787	11.1417	2.6358	11.142	2.70885	11.142	2.94115
11.1502	2.6522	11.1503	2.66535	11.1503	3.01875	11.15	2.72745	11.1502	2.4454	11.15	2.6039	11.1503	2.6759	11.1503	2.9062
11.1585	2.61775	11.1587	2.63255	11.1587	2.98635	11.1583	2.69505	11.1585	2.41395	11.1583	2.5703	11.1587	2.64315	11.1587	2.8711
11.1668	2.5823	11.167	2.59915	11.167	2.95235	11.1667	2.6618	11.1668	2.37935	11.1667	2.53835	11.167	2.6105	11.167	2.83615
11.1752	2.54705	11.1753	2.5657	11.1753	2.92045	11.175	2.6311	11.1752	2.3482	11.175	2.50365	11.1753	2.57685	11.1753	2.7999
11.1835	2.51185	11.1837	2.53365	11.1837	2.8873	11.1833	2.60095	11.1835	2.3177	11.1833	2.4722	11.1837	2.54575	11.1837	2.7674
11.1918	2.4754	11.192	2.4993	11.192	2.85455	11.1917	2.56915	11.1918	2.286	11.1917	2.4398	11.192	2.51375	11.192	2.7336
11.2002	2.43995	11.2003	2.4663	11.2003	2.82035	11.2	2.53915	11.2002	2.25385	11.2	2.40555	11.2003	2.4794	11.2003	2.6961
11.2085	2.40415	11.2087	2.43365	11.2087	2.78685	11.2083	2.5103	11.2085	2.2236	11.2083	2.372	11.2087	2.4484	11.2087	2.6634
11.2168	2.36745	11.217	2.39855	11.217	2.75465	11.2167	2.4823	11.2168	2.19565	11.2167	2.34265	11.217	2.41755	11.217	2.6297
11.2252	2.33205	11.2253	2.36575	11.2253	2.7232	11.225	2.45485	11.2252	2.1671	11.225	2.3107	11.2253	2.3876	11.2253	2.59525
11.2335	2.29905	11.2337	2.33345	11.2337	2.6894	11.2333	2.42445	11.2335	2.1385	11.2333	2.27965	11.2337	2.35485	11.2337	2.5594
11.2418	2.2632	11.242	2.3011	11.242	2.65925	11.2417	2.39815	11.2418	2.11235	11.2417	2.24965	11.242	2.32605	11.242	2.527
11.2502	2.2265	11.2503	2.2686	11.2503	2.62645	11.25	2.37135	11.2502	2.0852	11.25	2.22035	11.2503	2.29625	11.2503	2.49175
11.2585	2.19375	11.2587	2.2377	11.2587	2.5959	11.2583	2.3435	11.2585	2.0588	11.2583	2.191	11.2587	2.26675	11.2587	2.4576
11.2668	2.1582	11.267	2.20595	11.267	2.5666	11.2667	2.3212	11.2668	2.0346	11.2667	2.16395	11.267	2.23855	11.267	2.4256
11.2752	2.12195	11.2753	2.17585	11.2753	2.5345	11.275	2.29625	11.2752	2.00735	11.275	2.13405	11.2753	2.20755	11.2753	2.38955
11.2835	2.08845	11.2837	2.14555	11.2837	2.50505	11.2833	2.2711	11.2835	1.98325	11.2833	2.1062	11.2837	2.1788	11.2837	2.35545
11.2918	2.05625	11.292	2.11435	11.292	2.4763	11.2917	2.24555	11.2918	1.9578	11.2917	2.07835	11.292	2.1509	11.292	2.3206
11.3002	2.0207	11.3003	2.08375	11.3003	2.44715	11.3	2.2205	11.3002	1.93415	11.3	2.05195	11.3003	2.12405	11.3003	2.28805
11.3085	1.98745	11.3087	2.0558	11.3087	2.4201	11.3083	2.1999	11.3085	1.91525	11.3083	2.02725	11.3087	2.0984	11.3087	2.2569
11.3168	1.9536	11.317	2.0283	11.317	2.3939	11.3167	2.1784	11.3168	1.8953	11.3167	2.0028	11.317	2.07395	11.317	2.22575
11.3252	1.92075	11.3253	1.99965	11.3253	2.36795	11.325	2.158	11.3252	1.8751	11.325	1.9782	11.3253	2.0472	11.3253	2.19525
11.3335	1.88755	11.3337	1.9735	11.3337	2.3416	11.3333	2.1356	11.3335	1.854	11.3333	1.95415	11.3337	2.0227	11.3337	2.16335
11.3418	1.8542	11.342	1.94705	11.342	2.31935	11.3417	2.1195	11.3418	1.8383	11.3417	1.9335	11.342	2.0002	11.342	2.1354
11.3502	1.823	11.3503	1.92105	11.3503	2.2971	11.35	2.10095	11.3502	1.8205	11.35	1.91495	11.3503	1.97745	11.3503	2.1073
11.3585	1.7909	11.3587	1.89845	11.3587	2.2746	11.3583	2.08225	11.3585	1.8045	11.3583	1.89335	11.3587	1.9546	11.3587	2.07975
11.3668	1.7603	11.367	1.87395	11.367	2.2539	11.3667	2.0645	11.3668	1.79065	11.3667	1.87425	11.367	1.9327	11.367	2.051
11.3752	1.7289	11.3753	1.84875	11.3753	2.23095	11.375	2.04725	11.3752	1.7761	11.375	1.8562	11.3753	1.91065	11.3753	2.0272
11.3835	1.70175	11.3837	1.8276	11.3837	2.20995	11.3833	2.03345	11.3835	1.76275	11.3833	1.8379	11.3837	1.89215	11.3837	2.00235
11.3918	1.6706	11.392	1.80525	11.392	2.1894	11.3917	2.0174	11.3918	1.75085	11.3917	1.82005	11.392	1.8723	11.392	1.9767
11.4002	1.6422	11.4003	1.78265	11.4003	2.173	11.4	2.00465	11.4002	1.73865	11.4	1.8038	11.4003	1.85675	11.4003	1.95535
11.4085	1.6141	11.4087	1.76135	11.4087	2.1554	11.4083	1.9905	11.4085	1.72725	11.4083	1.78825	11.4087	1.8387	11.4087	1.9332
11.4168	1.5873	11.417	1.7402	11.417	2.1372	11.4167	1.97765	11.4168	1.7158	11.4167	1.77205	11.417	1.82035	11.417	1.91085
11.4252	1.56415	11.4253	1.72265	11.4253	2.12035	11.425	1.9647	11.4252	1.7055	11.425	1.75585	11.4253	1.80285	11.4253	1.8902
11.4335	1.5392	11.4337	1.7053	11.4337	2.10685	11.4333	1.95405	11.4335	1.6965	11.4333	1.7439	11.4337	1.78955	11.4337	1.8719
11.4418	1.5125	11.442	1.6861	11.442	2.09175	11.4417	1.9412	11.4418	1.68825	11.4417	1.7311	11.442	1.7752	11.442	1.85025
11.4502	1.48925	11.4503	1.67	11.4503	2.07795	11.45	1.9299	11.4502	1.67845	11.45	1.71795	11.4503	1.7595	11.4503	1.8324
11.4585	1.467	11.4587	1.65415	11.4587	2.0658	11.4583	1.9203	11.4585	1.67125	11.4583	1.7069	11.4587	1.7483	11.4587	1.81965
11.4668	1.4455	11.467	1.6384	11.467	2.0505	11.4667	1.90965	11.4668	1.6609	11.4667	1.6933	11.467	1.7337	11.467	1.79855
11.4752	1.4254	11.4753	1.62265	11.4753	2.03725	11.475	1.90115	11.4752	1.6536	11.475	1.68345	11.4753	1.72005	11.4753	1.77955
11.4835	1.40415	11.4837	1.60855	11.4837	2.02675	11.4833	1.89195	11.4835	1.6457	11.4833	1.6729	11.4837	1.70965	11.4837	1.76275
11.4918	1.38555	11.492	1.59585	11.492	2.01395	11.4917	1.88295	11.4918	1.6368	11.4917	1.66125	11.492	1.6986	11.492	1.74785
11.5002	1.36785	11.5003	1.58395	11.5003	2.003	11.5	1.874	11.5002	1.6302	11.5	1.6516	11.5003	1.68735	11.5003	1.735
11.5085	1.34815	11.5087	1.5708	11.5087	1.99285	11.5083	1.8642	11.5085	1.6219	11.5083	1.64205	11.5087	1.6773	11.5087	1.72155
11.5168	1.3312	11.517	1.55825	11.517	1.9828	11.5167	1.8567	11.5168	1.61445	11.5167	1.63335	11.517	1.6674	11.517	1.7089
11.5252	1.313	11.5253	1.548	11.5253	1.97445	11.525	1.84845	11.5252	1.60825	11.525	1.625	11.5253	1.657	11.5253	1.697
11.5335	1.29825	11.5337	1.5362	11.5337	1.9654	11.5333	1.84205	11.5335	1.60245	11.5333	1.61675	11.5337	1.6494	11.5337	1.6845
11.5418	1.28225	11.542	1.5254	11.542	1.95765	11.5417	1.8367	11.5418	1.59665	11.5417	1.6156	11.542	1.64135	11.542	1.6741
11.5502	1.2672	11.5503	1.5149	11.5503	1.949	11.55	1.8295	11.5502	1.59135	11.55	1.60365	11.5503	1.62525	11.5503	1.6636
11.5585	1.253	11.5587	1.5055	11.5587	1.9402	11.5583	1.8233	11.5585	1.5878	11.5583	1.59715	11.5587	1.5583	11.5587	1.6536
11.5668	1.23835	11.567	1.4973	11.567	1.9329	11.5667	1.817	11.5668	1.5804	11.5667	1.58915	11.567	1.6249	11.567	1.64375
11.5752	1.2275	11.5753	1.4894	11.5753	1.92575	11.575	1.812	11.5752	1.5773	11.575	1.58335	11.5753	1.6825	11.5753	1.63405
11.5835	1.2123	11.5837	1.48055	11.5837	1.91935	11.5833	1.80795	11.5835	1.573	11.5833	1.57735	11.5837	1.5933	11.5837	1.6263
11.5918	1.2001	11.592	1.47125	11.592	1.9116	11.5917	1.80055	11.5918	1.56755	11.5917	1.5709	11.592	1.575	11.592	1.6188
11.6002	1.1909	11.6003	1.46345	11.6003	1.9043	11.6	1.7959	11.6002	1.5624	11.6	1.56415	11.6003	1.57605	11.6003	1.6085
11.6085	1.1796	11.6087	1.45485	11.6087	1.89855	11.6083	1.79165	11.6085	1.55835	11.6083	1.55825	11.6087	1.5715	11.6087	1.6007
11.6168	1.16915	11.617	1.4496	11.617	1.89425	11.6167	1.7876	11.6168	1.55725	11.6167	1.5542	11.617	1.5707	11.617	1.5966
11.6252	1.1588	11.6253	1.44095	11.6253	1.8867	11.625	1.78155	11.6252	1.55195	11.625	1.5492	11.6253	1.5673	11.6253	1.58905
11.6335	1.14875	11.6337	1.43505	11.6337	1.88245	11.6333	1.7765	11.6335	1.54695	11.6333	1.5433	11.6337	1.561	11.6337	1.58245
11.6418	1.13995	11.642	1.42575	11.642	1.8754	11.6417	1.77195	11.6418	1.5433	11.6417	1.5368	11.642	1.5533	11.642	1.5741
11.6502	1.1299	11.6503	1.4187	11.6503	1.8708	11.65	1.76905	11.6502	1.5386	11.65	1.53245	11.6503	1.5489	11.6503	1.56705
11.6585	1.12155	11.6587	1.4132	11.6587	1.8652	11.6583	1.76365	11.6585	1.5319	11.6583	1.5265	11.6587	1.54275	11.6587	1.55985
11.6668	1.11415	11.667	1.40815	11.667	1.8608	11.6667	1.7608	11.6668	1.5293	11.6667	1.52315	11.667	1.5392	11.667	1.5554
11.6752	1.1051	11.6753	1.4006	11.6753	1.8565	11.675	1.75745	11.6752	1.5243	11.675	1.51855	11.6753	1.536	11.6753	1.54925
11.6835	1.0979	11.6837	1.39605	11.6837	1.8507	11.6833	1.7519	11.6835	1.52025	11.6833	1.51325	11.6837	1.53055	11.6837	1.5424
11.6918	1.09185	11.692	1.3921	11.692	1.8474	11.6917	1.74855	11.6918	1.5157	11.6917	1.50985	11.692	1.5271	11.692	1.53735
11.7002	1.0845	11.7003	1.3861	11.7003	1.8423	11.7	1.7441	11.7002	1.5133	11.7	1.5057	11.7003	1.52315	11.7003	1.532
11.7085	1.07785	11.7087	1.3796	11.7087	1.83575	11.7083	1.73925	11.7085	1.5093	11.7083	1.50105	11.7087	1.51805	11.7087	1.5259
11.7168	1.07225	11.717	1.37675	11.717	1.8328	11.7167	1.7372	11.7168	1.50485	11.7167	1.49705	11.717	1.51405	11.717	1.52265
11.7252	1.0649	11.7253	1.371	11.7253	1.82925	11.725	1.73345	11.7252	1.5026	11.725	1.49475	11.7253	1.5092	11.7253	1.51935
11.7335	1.05875	11.7337	1.36635	11.7337	1.82575	11.7333	1.73085	11.7335	1.5003	11.7333	1.493	11.7337	1.5062	11.7337	1.51275
11.7418	1.05255	11.742	1.35985	11.742	1.82245	11.7417	1.72735	11.7418	1.4968	11.7417	1.48945	11.742	1.5025	11.742	1.50975
11.7502	1.04725	11.7503	1.35695	11.7503	1.81855	11.75	1.7233	11.7502	1.49325	11.75	1.4861	11.7503	1.4991	11.7503	1.50575
11.7585	1.04395	11.7587	1.35455	11.7587	1.8129	11.7583	1.72035	11.7585	1.48935	11.7583	1.4823	11.7587	1.49455	11.7587	1.5014
11.7668	1.03895	11.767	1.34915	11.767	1.80935	11.7667	1.71885	11.7668	1.48915	11.7667	1.48035	11.767	1.4884	11.767	1.4978
11.7752	1.03485	11.7753	1.34535	11.7753	1.80635	11.775	1.71685	11.7752	1.4859	11.775	1.47675	11.7753	1.48275	11.7753	1.4926
11.7835	1.0303	11.7837	1.34085	11.7837	1.8023	11.7833	1.7139	11.7835	1.48285	11.7833	1.47365	11.7837	1.4685	11.7837	1.4886
11.7918	1.0245	11.792	1.3355	11.792	1.7996	11.7917	1.71125	11.7918	1.48125	11.7917	1.47125	11.792	1.4334	11.792	1.48395
11.8002	1.02245	11.8003	1.33155	11.8003	1.79525	11.8	1.7076	11.8002	1.4786	11.8	1.4701	11.8003	1.6221	11.8003	1.48145
11.8085	1.01875	11.8087	1.32885	11.8087	1.7935	11.8083	1.7083	11.8085	1.4784	11.8083	1.46855	11.8087	1.60635	11.8087	1.47945
11.8168	1.0142	11.817	1.32565	11.817	1.7883	11.8167	1.7031	11.8168	1.4759	11.8167	1.46545	11.817	1.46065	11.817	1.47525
11.8252	1.0109	11.8253	1.3212	11.8253	1.7853	11.825	1.7014	11.8252	1.47345	11.825	1.46305	11.8253	1.4591	11.8253	1.4713
11.8335	1.0081	11.8337	1.3169	11.8337	1.78395	11.8333	1.6998	11.8335	1.47065	11.8333	1.45935	11.8337	1.4638	11.8337	1.4682
11.8418	1.0065	11.842	1.3154	11.842	1.7787	11.8417	1.69755	11.8418	1.46815	11.8417	1.45655	11.842	1.4643	11.842	1.46345
11.8502	1.00235	11.8503	1.31145	11.8503	1.7783	11.85	1.6971	11.8502	1.4659	11.85	1.45615	11.8503	1.4627	11.8503	1.4609
11.8585	0.9997	11.8587	1.3077	11.8587	1.7746	11.8583	1.69445	11.8585	1.46315	11.8583	1.45435	11.8587	1.4608	11.8587	1.4573
11.8668	0.99715	11.867	1.3042	11.867	1.7725	11.8667	1.69295	11.8668	1.4609	11.8667	1.45175	11.867	1.4603	11.867	1.453
11.8752	0.9955	11.8753	1.30295	11.8753	1.76955	11.875	1.69165	11.8752	1.46025	11.875	1.4506	11.8753	1.45875	11.8753	1.45245
11.8835	0.9933	11.8837	1.30095	11.8837	1.7679	11.8833	1.68905	11.8835	1.457	11.8833	1.44745	11.8837	1.4555	11.8837	1.448
11.8918	0.9914	11.892	1.2967	11.892	1.7647	11.8917	1.68875	11.8918	1.4576	11.8917	1.448	11.892	1.45495	11.892	1.44515
11.9002	0.9896	11.9003	1.2959	11.9003	1.76285	11.9	1.68555	11.9002	1.4544	11.9	1.445	11.9003	1.45275	11.9003	1.44285
11.9085	0.98675	11.9087	1.2936	11.9087	1.7603	11.9083	1.68475	11.9085	1.45145	11.9083	1.44345	11.9087	1.4506	11.9087	1.4403
11.9168	0.98335	11.917	1.29165	11.917	1.75705	11.9167	1.6826	11.9168	1.45065	11.9167	1.4429	11.917	1.4484	11.917	1.43715
11.9252	0.981	11.9253	1.28955	11.9253	1.7543	11.925	1.68115	11.9252	1.451	11.925	1.44335	11.9253	1.44755	11.9253	1.43585
11.9335	0.9782	11.9337	1.2863	11.9337	1.75655	11.9333	1.68035	11.9335	1.45025	11.9333	1.4408	11.9337	1.44625	11.9337	1.4343
11.9418	0.97515	11.942	1.2823	11.942	1.76455	11.9417	1.6781	11.9418	1.4478	11.9417	1.4404	11.942	1.4442	11.942	1.43255
11.9502	0.97525	11.9503	1.2829	11.9503	1.7775	11.95	1.6754	11.9502	1.4462	11.95	1.4385	11.9503	1.44245	11.9503	1.43055
11.9585	0.97035	11.9587	1.2811	11.9587	1.75315	11.9583	1.67455	11.9585	1.44405	11.9583	1.43775	11.9587	1.44115	11.9587	1.428
11.9668	0.96585	11.967	1.2785	11.967	1.74535	11.9667	1.6737	11.9668	1.4442	11.9667	1.43635	11.967	1.4393	11.967	1.42595
11.9752	0.96415	11.9753	1.2757	11.9753	1.74635	11.975	1.67435	11.9752	1.4439	11.975	1.4364	11.9753	1.4385	11.9753	1.42585
11.9835	0.9634	11.9837	1.27455	11.9837	1.74585	11.9833	1.6729	11.9835	1.44305	11.9833	1.4345	11.9837	1.4358	11.9837	1.4242
11.9918	0.9607	11.992	1.2709	11.992	1.74335	11.9917	1.66905	11.9918	1.4419	11.9917	1.43275	11.992	1.4349	11.992	1.4217
12.0002	0.9608	12.0003	1.2708	12.0003	1.74165	12	1.66935	12.0002	1.4406	12	1.43135	12.0003	1.4353	12.0003	1.4204
12.0085	0.9587	12.0087	1.26805	12.0087	1.7418	12.0083	1.66975	12.0085	1.44085	12.0083	1.43075	12.0087	1.43375	12.0087	1.4208
12.0168	0.95925	12.017	1.26745	12.017	1.7408	12.0167	1.67015	12.0168	1.44145	12.0167	1.43205	12.017	1.4346	12.017	1.41995
12.0252	0.95655	12.0253	1.2661	12.0253	1.73935	12.025	1.6684	12.0252	1.4385	12.025	1.4303	12.0253	1.43165	12.0253	1.41715
12.0335	0.9564	12.0337	1.26405	12.0337	1.73715	12.0333	1.66815	12.0335	1.4383	12.0333	1.4289	12.0337	1.4303	12.0337	1.41675
12.0418	0.9557	12.042	1.26385	12.042	1.73475	12.0417	1.66595	12.0418	1.4364	12.0417	1.4268	12.042	1.42785	12.042	1.41335
12.0502	0.95425	12.0503	1.2589	12.0503	1.7343	12.05	1.66455	12.0502	1.4353	12.05	1.42525	12.0503	1.42835	12.0503	1.41305
12.0585	0.95345	12.0587	1.258	12.0587	1.7319	12.0583	1.663	12.0585	1.4327	12.0583	1.4241	12.0587	1.4288	12.0587	1.41005
12.0668	0.95445	12.067	1.2572	12.067	1.73035	12.0667	1.66115	12.0668	1.4322	12.0667	1.42295	12.067	1.42665	12.067	1.40755
12.0752	0.9527	12.0753	1.256	12.0753	1.7287	12.075	1.6603	12.0752	1.43185	12.075	1.4228	12.0753	1.4273	12.0753	1.4069
12.0835	0.95025	12.0837	1.252	12.0837	1.72855	12.0833	1.65975	12.0835	1.4317	12.0833	1.422	12.0837	1.42645	12.0837	1.4075
12.0918	0.95135	12.092	1.2537	12.092	1.7279	12.0917	1.6614	12.0918	1.4313	12.0917	1.42185	12.092	1.4246	12.092	1.40605
12.1002	0.9492	12.1003	1.2509	12.1003	1.72595	12.1	1.6592	12.1002	1.42905	12.1	1.4201	12.1003	1.42295	12.1003	1.4032
12.1085	0.94845	12.1087	1.2494	12.1087	1.7262	12.1083	1.66005	12.1085	1.42935	12.1083	1.42135	12.1087	1.421	12.1087	1.4036
12.1168	0.9468	12.117	1.2483	12.117	1.7239	12.1167	1.65855	12.1168	1.42915	12.1167	1.4206	12.117	1.4189	12.117	1.402
12.1252	0.9472	12.1253	1.25055	12.1253	1.725	12.125	1.65905	12.1252	1.43045	12.125	1.4229	12.1253	1.4202	12.1253	1.40175
12.1335	0.94435	12.1337	1.25025	12.1337	1.72145	12.1333	1.6583	12.1335	1.42915	12.1333	1.42035	12.1337	1.41815	12.1337	1.3998
12.1418	0.94455	12.142	1.2507	12.142	1.7207	12.1417	1.65775	12.1418	1.4304	12.1417	1.41945	12.142	1.41745	12.142	1.3993
12.1502	0.94385	12.1503	1.2477	12.1503	1.72105	12.15	1.6573	12.1502	1.4296	12.15	1.4191	12.1503	1.41645	12.1503	1.39935
12.1585	0.9407	12.1587	1.2454	12.1587	1.72055	12.1583	1.6606	12.1585	1.4305	12.1583	1.4189	12.1587	1.4164	12.1587	1.4004
12.1668	0.94005	12.167	1.24365	12.167	1.7217	12.1667	1.6626	12.1668	1.4333	12.1667	1.41925	12.167	1.4155	12.167	1.3988
12.1752	0.93965	12.1753	1.2422	12.1753	1.71985	12.175	1.6633	12.1752	1.43575	12.175	1.4203	12.1753	1.416	12.1753	1.4
12.1835	0.9371	12.1837	1.24135	12.1837	1.7203	12.1833	1.6638	12.1835	1.43795	12.1833	1.4216	12.1837	1.41625	12.1837	1.39985
12.1918	0.93685	12.192	1.24255	12.192	1.72055	12.1917	1.66715	12.1918	1.44015	12.1917	1.4207	12.192	1.4169	12.192	1.39995
12.2002	0.93765	12.2003	1.2412	12.2003	1.72235	12.2	1.6709	12.2002	1.44365	12.2	1.42245	12.2003	1.41785	12.2003	1.40065
12.2085	0.93555	12.2087	1.24015	12.2087	1.72325	12.2083	1.673	12.2085	1.4458	12.2083	1.42305	12.2087	1.4168	12.2087	1.401
12.2168	0.93625	12.217	1.24155	12.217	1.723	12.2167	1.677	12.2168	1.4492	12.2167	1.42285	12.217	1.41705	12.217	1.3988
12.2252	0.934	12.2253	1.23925	12.2253	1.7229	12.225	1.6815	12.2252	1.4523	12.225	1.42425	12.2253	1.41485	12.2253	1.39675
12.2335	0.93365	12.2337	1.2401	12.2337	1.7248	12.2333	1.68865	12.2335	1.4576	12.2333	1.42855	12.2337	1.4167	12.2337	1.3971
12.2418	0.933	12.242	1.24005	12.242	1.7269	12.2417	1.69495	12.2418	1.4635	12.2417	1.4335	12.242	1.41805	12.242	1.3972
12.2502	0.9326	12.2503	1.24325	12.2503	1.7277	12.25	1.70295	12.2502	1.46875	12.25	1.43755	12.2503	1.4202	12.2503	1.39825
12.2585	0.9315	12.2587	1.2434	12.2587	1.7332	12.2583	1.7099	12.2585	1.47505	12.2583	1.4419	12.2587	1.4219	12.2587	1.39825
12.2668	0.9321	12.267	1.2467	12.267	1.7352	12.2667	1.71765	12.2668	1.48085	12.2667	1.4447	12.267	1.4207	12.267	1.39855
12.2752	0.92845	12.2753	1.24515	12.2753	1.74075	12.275	1.7266	12.2752	1.48835	12.275	1.45025	12.2753	1.42385	12.2753	1.40075
12.2835	0.9291	12.2837	1.2496	12.2837	1.7458	12.2833	1.73855	12.2835	1.4956	12.2833	1.45495	12.2837	1.42475	12.2837	1.40175
12.2918	0.92565	12.292	1.25135	12.292	1.75385	12.2917	1.7491	12.2918	1.50365	12.2917	1.4628	12.292	1.42925	12.292	1.40395
12.3002	0.9248	12.3003	1.2545	12.3003	1.76165	12.3	1.76245	12.3002	1.51295	12.3	1.46925	12.3003	1.43275	12.3003	1.4064
12.3085	0.925	12.3087	1.2578	12.3087	1.7715	12.3083	1.77195	12.3085	1.5214	12.3083	1.47795	12.3087	1.4362	12.3087	1.40875
12.3168	0.92315	12.317	1.26135	12.317	1.78045	12.3167	1.78225	12.3168	1.5268	12.3167	1.4849	12.317	1.44135	12.317	1.4129
12.3252	0.9226	12.3253	1.2661	12.3253	1.79215	12.325	1.793	12.3252	1.5353	12.325	1.49385	12.3253	1.4483	12.3253	1.4175
12.3335	0.92155	12.3337	1.2711	12.3337	1.80085	12.3333	1.8007	12.3335	1.54025	12.3333	1.5006	12.3337	1.4522	12.3337	1.4196
12.3418	0.92265	12.342	1.2786	12.342	1.8136	12.3417	1.8092	12.3418	1.5452	12.3417	1.5096	12.342	1.45745	12.342	1.4248
12.3502	0.91855	12.3503	1.2847	12.3503	1.8289	12.35	1.81605	12.3502	1.5504	12.35	1.51745	12.3503	1.4654	12.3503	1.43165
12.3585	0.92075	12.3587	1.29295	12.3587	1.8431	12.3583	1.82085	12.3585	1.5526	12.3583	1.5249	12.3587	1.47215	12.3587	1.43575
12.3668	0.92015	12.367	1.30165	12.367	1.85615	12.3667	1.8261	12.3668	1.55535	12.3667	1.5342	12.367	1.4798	12.367	1.4446
12.3752	0.91825	12.3753	1.3097	12.3753	1.87095	12.375	1.82955	12.3752	1.5583	12.375	1.54145	12.3753	1.48995	12.3753	1.45345
12.3835	0.91755	12.3837	1.3193	12.3837	1.8837	12.3833	1.8309	12.3835	1.5579	12.3833	1.54625	12.3837	1.49785	12.3837	1.46115
12.3918	0.91775	12.392	1.3304	12.392	1.8969	12.3917	1.8316	12.3918	1.55645	12.3917	1.5512	12.392	1.50435	12.392	1.46845
12.4002	0.91675	12.4003	1.33795	12.4003	1.9074	12.4	1.8318	12.4002	1.5544	12.4	1.5552	12.4003	1.5118	12.4003	1.47435
12.4085	0.91685	12.4087	1.3471	12.4087	1.91685	12.4083	1.83155	12.4085	1.55455	12.4083	1.5605	12.4087	1.5216	12.4087	1.4849
12.4168	0.91635	12.417	1.3552	12.417	1.9276	12.4167	1.828	12.4168	1.5504	12.4167	1.5619	12.417	1.52615	12.417	1.4914
12.4252	0.91535	12.4253	1.3612	12.4253	1.93465	12.425	1.82575	12.4252	1.54795	12.425	1.56395	12.4253	1.5333	12.4253	1.5009
12.4335	0.91705	12.4337	1.37065	12.4337	1.9383	12.4333	1.8212	12.4335	1.54475	12.4333	1.56415	12.4337	1.53915	12.4337	1.5086
12.4418	0.91655	12.442	1.37855	12.442	1.9434	12.4417	1.81825	12.4418	1.54005	12.4417	1.56375	12.442	1.54435	12.442	1.51595
12.4502	0.91425	12.4503	1.38025	12.4503	1.9457	12.45	1.81385	12.4502	1.53425	12.45	1.5629	12.4503	1.5476	12.4503	1.521
12.4585	0.9158	12.4587	1.38565	12.4587	1.94645	12.4583	1.8091	12.4585	1.52965	12.4583	1.5603	12.4587	1.55055	12.4587	1.52655
12.4668	0.91115	12.467	1.38645	12.467	1.946	12.4667	1.80605	12.4668	1.5235	12.4667	1.5568	12.467	1.55095	12.467	1.5305
12.4752	0.9126	12.4753	1.38885	12.4753	1.94775	12.475	1.8004	12.4752	1.5187	12.475	1.5555	12.4753	1.55095	12.4753	1.5342
12.4835	0.90785	12.4837	1.38655	12.4837	1.94525	12.4833	1.7946	12.4835	1.51285	12.4833	1.5515	12.4837	1.55115	12.4837	1.53725
12.4918	0.90875	12.492	1.388	12.492	1.9451	12.4917	1.79065	12.4918	1.5095	12.4917	1.54865	12.492	1.5513	12.492	1.5404
12.5002	0.90555	12.5003	1.3858	12.5003	1.93975	12.5	1.78485	12.5002	1.5028	12.5	1.54405	12.5003	1.55035	12.5003	1.5418
12.5085	0.9047	12.5087	1.38345	12.5087	1.93705	12.5083	1.78125	12.5085	1.49855	12.5083	1.5408	12.5087	1.54965	12.5087	1.54115
12.5168	0.9043	12.517	1.3793	12.517	1.93325	12.5167	1.77875	12.5168	1.49345	12.5167	1.53715	12.517	1.54765	12.517	1.5428
12.5252	0.9041	12.5253	1.37555	12.5253	1.92745	12.525	1.7737	12.5252	1.489	12.525	1.53285	12.5253	1.5465	12.5253	1.54315
12.5335	0.9033	12.5337	1.3718	12.5337	1.90885	12.5333	1.77015	12.5335	1.48365	12.5333	1.5274	12.5337	1.5411	12.5337	1.53935
12.5418	0.90365	12.542	1.36675	12.542	1.925	12.5417	1.76685	12.5418	1.4802	12.5417	1.52335	12.542	1.5365	12.542	1.5387
12.5502	0.9035	12.5503	1.36065	12.5503	1.9161	12.55	1.76405	12.5502	1.4759	12.55	1.5195	12.5503	1.5328	12.5503	1.53645
12.5585	0.90265	12.5587	1.35605	12.5587	1.9045	12.5583	1.76085	12.5585	1.47225	12.5583	1.5151	12.5587	1.5316	12.5587	1.53575
12.5668	0.9021	12.567	1.3513	12.567	1.9011	12.5667	1.7593	12.5668	1.46875	12.5667	1.51275	12.567	1.5286	12.567	1.53505
12.5752	0.9017	12.5753	1.3451	12.5753	1.8967	12.575	1.7584	12.5752	1.4649	12.575	1.5112	12.5753	1.5231	12.5753	1.53275
12.5835	0.901	12.5837	1.33985	12.5837	1.892	12.5833	1.7565	12.5835	1.46175	12.5833	1.50725	12.5837	1.51935	12.5837	1.5276
12.5918	0.90075	12.592	1.33605	12.592	1.88685	12.5917	1.7561	12.5918	1.45775	12.5917	1.50445	12.592	1.5142	12.592	1.52675
12.6002	0.8997	12.6003	1.33145	12.6003	1.88315	12.6	1.7535	12.6002	1.45375	12.6	1.5035	12.6003	1.5099	12.6003	1.52125
12.6085	0.89975	12.6087	1.32455	12.6087	1.88135	12.6083	1.75475	12.6085	1.4522	12.6083	1.5038	12.6087	1.50615	12.6087	1.5195
12.6168	0.8999	12.617	1.3223	12.617	1.87745	12.6167	1.7554	12.6168	1.4473	12.6167	1.50305	12.617	1.5046	12.617	1.5149
12.6252	0.89835	12.6253	1.3195	12.6253	1.87295	12.625	1.7566	12.6252	1.44575	12.625	1.5032	12.6253	1.50025	12.6253	1.5135
12.6335	0.9008	12.6337	1.31785	12.6337	1.87025	12.6333	1.75855	12.6335	1.44505	12.6333	1.50385	12.6337	1.4977	12.6337	1.51085
12.6418	0.89835	12.642	1.3138	12.642	1.8683	12.6417	1.75935	12.6418	1.4447	12.6417	1.5053	12.642	1.49535	12.642	1.509
12.6502	0.8965	12.6503	1.31285	12.6503	1.86805	12.65	1.76355	12.6502	1.4439	12.65	1.5103	12.6503	1.49375	12.6503	1.5086
12.6585	0.897	12.6587	1.3109	12.6587	1.86795	12.6583	1.7679	12.6585	1.44445	12.6583	1.51325	12.6587	1.4914	12.6587	1.50775
12.6668	0.89595	12.667	1.31195	12.667	1.86865	12.6667	1.7725	12.6668	1.447	12.6667	1.51845	12.667	1.4923	12.667	1.50725
12.6752	0.89505	12.6753	1.3137	12.6753	1.8685	12.675	1.77565	12.6752	1.4482	12.675	1.52345	12.6753	1.48945	12.6753	1.50685
12.6835	0.8941	12.6837	1.31575	12.6837	1.8693	12.6833	1.7819	12.6835	1.45135	12.6833	1.5281	12.6837	1.4896	12.6837	1.50825
12.6918	0.8943	12.692	1.3174	12.692	1.8709	12.6917	1.78795	12.6918	1.4535	12.6917	1.53455	12.692	1.491	12.692	1.5103
12.7002	0.89365	12.7003	1.31955	12.7003	1.87145	12.7	1.795	12.7002	1.4577	12.7	1.54225	12.7003	1.493	12.7003	1.51215
12.7085	0.8929	12.7087	1.32365	12.7087	1.8738	12.7083	1.80225	12.7085	1.46285	12.7083	1.54925	12.7087	1.4949	12.7087	1.5141
12.7168	0.8922	12.717	1.3278	12.717	1.8485	12.7167	1.80815	12.7168	1.4683	12.7167	1.5575	12.717	1.4973	12.717	1.5166
12.7252	0.8942	12.7253	1.33365	12.7253	1.89105	12.725	1.8175	12.7252	1.47565	12.725	1.5667	12.7253	1.5026	12.7253	1.52255
12.7335	0.8949	12.7337	1.34145	12.7337	1.89305	12.7333	1.8228	12.7335	1.4815	12.7333	1.57175	12.7337	1.5041	12.7337	1.52445
12.7418	0.8951	12.742	1.3428	12.742	1.8784	12.7417	1.8313	12.7418	1.49015	12.7417	1.5836	12.742	1.5098	12.742	1.53075
12.7502	0.89645	12.7503	1.3498	12.7503	1.8874	12.75	1.83765	12.7502	1.4974	12.75	1.5878	12.7503	1.51585	12.7503	1.53525
12.7585	0.8993	12.7587	1.35815	12.7587	1.8982	12.7583	1.84585	12.7585	1.50645	12.7583	1.59845	12.7587	1.5216	12.7587	1.54095
12.7668	0.8996	12.767	1.36375	12.767	1.9052	12.7667	1.85265	12.7668	1.5144	12.7667	1.60665	12.767	1.52815	12.767	1.5475
12.7752	0.9007	12.7753	1.37105	12.7753	1.9122	12.775	1.86325	12.7752	1.52465	12.775	1.61535	12.7753	1.53715	12.7753	1.5548
12.7835	0.9023	12.7837	1.37805	12.7837	1.9168	12.7833	1.8685	12.7835	1.53385	12.7833	1.62175	12.7837	1.544	12.7837	1.56085
12.7918	0.90485	12.792	1.38415	12.792	1.9219	12.7917	1.8763	12.7918	1.54185	12.7917	1.6303	12.792	1.55205	12.792	1.5685
12.8002	0.90805	12.8003	1.394	12.8003	1.9278	12.8	1.88055	12.8002	1.5514	12.8	1.63705	12.8003	1.5591	12.8003	1.5747
12.8085	0.91	12.8087	1.4015	12.8087	1.93435	12.8083	1.8868	12.8085	1.5604	12.8083	1.6438	12.8087	1.5714	12.8087	1.5829
12.8168	0.91475	12.817	1.4095	12.817	1.9379	12.8167	1.89145	12.8168	1.56795	12.8167	1.6483	12.817	1.5782	12.817	1.58895
12.8252	0.91935	12.8253	1.41455	12.8253	1.9426	12.825	1.8956	12.8252	1.57555	12.825	1.6528	12.8253	1.58665	12.8253	1.59485
12.8335	0.9229	12.8337	1.4205	12.8337	1.948	12.8333	1.9005	12.8335	1.58455	12.8333	1.6579	12.8337	1.59515	12.8337	1.603
12.8418	0.9263	12.842	1.42605	12.842	1.9534	12.8417	1.90525	12.8418	1.5941	12.8417	1.66455	12.842	1.60485	12.842	1.6102
12.8502	0.93255	12.8503	1.4355	12.8503	1.9569	12.85	1.9083	12.8502	1.60015	12.85	1.6684	12.8503	1.61135	12.8503	1.61555
12.8585	0.9385	12.8587	1.43945	12.8587	1.9642	12.8583	1.9117	12.8585	1.60855	12.8583	1.6728	12.8587	1.6203	12.8587	1.6229
12.8668	0.94665	12.867	1.4459	12.867	1.9666	12.8667	1.9147	12.8668	1.6156	12.8667	1.6766	12.867	1.6285	12.867	1.63005
12.8752	0.9544	12.8753	1.4523	12.8753	1.96985	12.875	1.91825	12.8752	1.6207	12.875	1.6805	12.8753	1.6349	12.8753	1.63605
12.8835	0.9618	12.8837	1.45615	12.8837	1.97175	12.8833	1.92025	12.8835	1.6267	12.8833	1.6826	12.8837	1.64145	12.8837	1.6415
12.8918	0.96625	12.892	1.4581	12.892	1.97305	12.8917	1.92285	12.8918	1.6325	12.8917	1.68435	12.892	1.6473	12.892	1.64595
12.9002	0.977	12.9003	1.46295	12.9003	1.97575	12.9	1.92505	12.9002	1.63835	12.9	1.68675	12.9003	1.6527	12.9003	1.6513
12.9085	0.987	12.9087	1.46485	12.9087	1.9782	12.9083	1.92685	12.9085	1.6417	12.9083	1.6865	12.9087	1.65775	12.9087	1.6569
12.9168	0.99725	12.917	1.46695	12.917	1.97755	12.9167	1.92545	12.9168	1.64345	12.9167	1.68675	12.917	1.66045	12.917	1.6566
12.9252	1.0089	12.9253	1.4705	12.9253	1.98025	12.925	1.929	12.9252	1.65015	12.925	1.68865	12.9253	1.6649	12.9253	1.66195
12.9335	1.0178	12.9337	1.46995	12.9337	1.9817	12.9333	1.9311	12.9335	1.65405	12.9333	1.69025	12.9337	1.67265	12.9337	1.66665
12.9418	1.0285	12.942	1.47215	12.942	1.9806	12.9417	1.93145	12.9418	1.6546	12.9417	1.68995	12.942	1.6726	12.942	1.66815
12.9502	1.0405	12.9503	1.4745	12.9503	1.98175	12.95	1.93135	12.9502	1.65715	12.95	1.6886	12.9503	1.6754	12.9503	1.66875
12.9585	1.05065	12.9587	1.4745	12.9587	1.98115	12.9583	1.9316	12.9585	1.6577	12.9583	1.68935	12.9587	1.67835	12.9587	1.67005
12.9668	1.0612	12.967	1.47425	12.967	1.9792	12.9667	1.93245	12.9668	1.65665	12.9667	1.68715	12.967	1.6801	12.967	1.67055
12.9752	1.07335	12.9753	1.4755	12.9753	1.98115	12.975	1.9339	12.9752	1.6573	12.975	1.6875	12.9753	1.68295	12.9753	1.67145
12.9835	1.08365	12.9837	1.47545	12.9837	1.9822	12.9833	1.93515	12.9835	1.6582	12.9833	1.68695	12.9837	1.6841	12.9837	1.6736
12.9918	1.0926	12.992	1.476	12.992	1.98105	12.9917	1.93385	12.9918	1.6568	12.9917	1.6867	12.992	1.6859	12.992	1.67305
13.0002	1.1044	13.0003	1.4765	13.0003	1.98245	13	1.93405	13.0002	1.6575	13	1.6862	13.0003	1.68785	13.0003	1.67365
13.0085	1.1137	13.0087	1.4798	13.0087	1.97835	13.0083	1.92965	13.0085	1.65355	13.0083	1.6839	13.0087	1.6877	13.0087	1.6719
13.0168	1.1204	13.017	1.4757	13.017	1.97775	13.0167	1.92895	13.0168	1.65075	13.0167	1.6824	13.017	1.6875	13.017	1.67165
13.0252	1.1282	13.0253	1.4766	13.0253	1.9767	13.025	1.9265	13.0252	1.6491	13.025	1.68125	13.0253	1.68755	13.0253	1.6705
13.0335	1.1338	13.0337	1.4749	13.0337	1.97765	13.0333	1.92445	13.0335	1.6447	13.0333	1.67895	13.0337	1.6872	13.0337	1.67125
13.0418	1.1409	13.042	1.4727	13.042	1.97945	13.0417	1.9223	13.0418	1.6414	13.0417	1.67815	13.042	1.6886	13.042	1.67175
13.0502	1.14575	13.0503	1.4728	13.0503	1.97755	13.05	1.9176	13.0502	1.63605	13.05	1.6763	13.0503	1.689	13.0503	1.67155
13.0585	1.1524	13.0587	1.47355	13.0587	1.9771	13.0583	1.91245	13.0585	1.6296	13.0583	1.6719	13.0587	1.68845	13.0587	1.67135
13.0668	1.15635	13.067	1.47275	13.067	1.97455	13.0667	1.9086	13.0668	1.62235	13.0667	1.67035	13.067	1.6873	13.067	1.67125
13.0752	1.1605	13.0753	1.4714	13.0753	1.97285	13.075	1.90155	13.0752	1.61505	13.075	1.6641	13.0753	1.68475	13.0753	1.6695
13.0835	1.16525	13.0837	1.46875	13.0837	1.9706	13.0833	1.8932	13.0835	1.60525	13.0833	1.65955	13.0837	1.68285	13.0837	1.66775
13.0918	1.1677	13.092	1.46585	13.092	1.96715	13.0917	1.8856	13.0918	1.5965	13.0917	1.65345	13.092	1.6809	13.092	1.66845
13.1002	1.17145	13.1003	1.4619	13.1003	1.9642	13.1	1.87775	13.1002	1.58665	13.1	1.6476	13.1003	1.67785	13.1003	1.66615
13.1085	1.1745	13.1087	1.4595	13.1087	1.9598	13.1083	1.86575	13.1085	1.57705	13.1083	1.64015	13.1087	1.67445	13.1087	1.6636
13.1168	1.1773	13.117	1.45595	13.117	1.95715	13.1167	1.85635	13.1168	1.56675	13.1167	1.63485	13.117	1.6716	13.117	1.664
13.1252	1.1783	13.1253	1.4513	13.1253	1.9508	13.125	1.84615	13.1252	1.5548	13.125	1.6253	13.1253	1.66735	13.1253	1.66145
13.1335	1.18035	13.1337	1.4456	13.1337	1.94565	13.1333	1.83375	13.1335	1.54355	13.1333	1.6181	13.1337	1.66315	13.1337	1.6586
13.1418	1.18325	13.142	1.44185	13.142	1.9399	13.1417	1.82245	13.1418	1.5307	13.1417	1.60915	13.142	1.65655	13.142	1.6544
13.1502	1.18215	13.1503	1.43555	13.1503	1.9336	13.15	1.81265	13.1502	1.51965	13.15	1.6022	13.1503	1.6517	13.1503	1.65075
13.1585	1.18485	13.1587	1.4267	13.1587	1.9254	13.1583	1.80295	13.1585	1.507	13.1583	1.59225	13.1587	1.643	13.1587	1.645
13.1668	1.18745	13.167	1.41645	13.167	1.91865	13.1667	1.79165	13.1668	1.49655	13.1667	1.5859	13.167	1.6344	13.167	1.63945
13.1752	1.1877	13.1753	1.40885	13.1753	1.9111	13.175	1.7835	13.1752	1.48745	13.175	1.5781	13.1753	1.62735	13.1753	1.6347
13.1835	1.186	13.1837	1.3998	13.1837	1.9014	13.1833	1.77365	13.1835	1.47375	13.1833	1.56725	13.1837	1.61745	13.1837	1.6265
13.1918	1.18565	13.192	1.3913	13.192	1.8938	13.1917	1.76555	13.1918	1.4664	13.1917	1.5607	13.192	1.6087	13.192	1.6196
13.2002	1.1843	13.2003	1.3814	13.2003	1.88555	13.2	1.7596	13.2002	1.458	13.2	1.55415	13.2003	1.59905	13.2003	1.6126
13.2085	1.1859	13.2087	1.3728	13.2087	1.87845	13.2083	1.75225	13.2085	1.45065	13.2083	1.5488	13.2087	1.5878	13.2087	1.60575
13.2168	1.1838	13.217	1.3647	13.217	1.8732	13.2167	1.75	13.2168	1.4465	13.2167	1.54585	13.217	1.5786	13.217	1.59855
13.2252	1.18105	13.2253	1.35335	13.2253	1.86745	13.225	1.74615	13.2252	1.4423	13.225	1.5453	13.2253	1.5685	13.2253	1.58975
13.2335	1.17985	13.2337	1.3447	13.2337	1.863	13.2333	1.74255	13.2335	1.4394	13.2333	1.5434	13.2337	1.55925	13.2337	1.58185
13.2418	1.17275	13.242	1.33275	13.242	1.86075	13.2417	1.7437	13.2418	1.44055	13.2417	1.54585	13.242	1.55235	13.242	1.577
13.2502	1.17145	13.2503	1.3237	13.2503	1.85565	13.25	1.74005	13.2502	1.4383	13.25	1.5448	13.2503	1.54215	13.2503	1.5685
13.2585	1.16575	13.2587	1.3167	13.2587	1.85425	13.2583	1.7395	13.2585	1.4402	13.2583	1.5466	13.2587	1.5352	13.2587	1.56025
13.2668	1.1611	13.267	1.3037	13.267	1.85175	13.2667	1.73925	13.2668	1.44045	13.2667	1.5466	13.267	1.5271	13.267	1.55395
13.2752	1.15455	13.2753	1.2939	13.2753	1.85005	13.275	1.73865	13.2752	1.4458	13.275	1.5497	13.2753	1.52365	13.2753	1.54975
13.2835	1.1475	13.2837	1.286	13.2837	1.8496	13.2833	1.73815	13.2835	1.44845	13.2833	1.5509	13.2837	1.519	13.2837	1.5441
13.2918	1.13945	13.292	1.2785	13.292	1.8501	13.2917	1.73765	13.2918	1.4528	13.2917	1.555	13.292	1.5158	13.292	1.5402
13.3002	1.13135	13.3003	1.27025	13.3003	1.84975	13.3	1.7355	13.3002	1.4573	13.3	1.55675	13.3003	1.5129	13.3003	1.53645
13.3085	1.123	13.3087	1.26345	13.3087	1.85115	13.3083	1.7362	13.3085	1.4656	13.3083	1.56025	13.3087	1.5156	13.3087	1.53655
13.3168	1.11225	13.317	1.25785	13.317	1.85235	13.3167	1.73615	13.3168	1.47285	13.3167	1.562	13.317	1.5166	13.317	1.53625
13.3252	1.10195	13.3253	1.25105	13.3253	1.85265	13.325	1.73395	13.3252	1.47795	13.325	1.56385	13.3253	1.51605	13.3253	1.53365
13.3335	1.0901	13.3337	1.24715	13.3337	1.8538	13.3333	1.73435	13.3335	1.4844	13.3333	1.5634	13.3337	1.51735	13.3337	1.53405
13.3418	1.07885	13.342	1.2448	13.342	1.85275	13.3417	1.732	13.3418	1.4872	13.3417	1.56235	13.342	1.51955	13.342	1.5323
13.3502	1.06745	13.3503	1.23945	13.3503	1.8524	13.35	1.7309	13.3502	1.49035	13.35	1.5638	13.3503	1.52165	13.3503	1.53085
13.3585	1.05655	13.3587	1.2359	13.3587	1.85205	13.3583	1.73025	13.3585	1.49365	13.3583	1.563	13.3587	1.524	13.3587	1.528
13.3668	1.0429	13.367	1.2316	13.367	1.8519	13.3667	1.7303	13.3668	1.4994	13.3667	1.56355	13.367	1.5277	13.367	1.52965
13.3752	1.03315	13.3753	1.23005	13.3753	1.85175	13.375	1.734	13.3752	1.50225	13.375	1.5625	13.3753	1.5308	13.3753	1.5288
13.3835	1.021	13.3837	1.22865	13.3837	1.85045	13.3833	1.73355	13.3835	1.5042	13.3833	1.561	13.3837	1.53335	13.3837	1.52625
13.3918	1.01215	13.392	1.22595	13.392	1.8512	13.3917	1.7382	13.3918	1.5073	13.3917	1.56345	13.392	1.53605	13.392	1.5246
13.4002	0.99955	13.4003	1.2238	13.4003	1.85125	13.4	1.7423	13.4002	1.5102	13.4	1.565	13.4003	1.5368	13.4003	1.52415
13.4085	0.9886	13.4087	1.2215	13.4087	1.8531	13.4083	1.74875	13.4085	1.5126	13.4083	1.5674	13.4087	1.5375	13.4087	1.5229
13.4168	0.97845	13.417	1.2189	13.417	1.85885	13.4167	1.7586	13.4168	1.51695	13.4167	1.5732	13.417	1.5391	13.417	1.52185
13.4252	0.9701	13.4253	1.2194	13.4253	1.861	13.425	1.7667	13.4252	1.5204	13.425	1.5784	13.4253	1.5391	13.4253	1.5193
13.4335	0.9614	13.4337	1.2184	13.4337	1.8682	13.4333	1.7792	13.4335	1.52635	13.4333	1.5873	13.4337	1.5413	13.4337	1.521
13.4418	0.95385	13.442	1.2185	13.442	1.87815	13.4417	1.79385	13.4418	1.5338	13.4417	1.59745	13.442	1.54315	13.442	1.5221
13.4502	0.9452	13.4503	1.21775	13.4503	1.88635	13.45	1.8079	13.4502	1.53755	13.45	1.6038	13.4503	1.5425	13.4503	1.5213
13.4585	0.9407	13.4587	1.2173	13.4587	1.8992	13.4583	1.82125	13.4585	1.5487	13.4583	1.61725	13.4587	1.5437	13.4587	1.52525
13.4668	0.9334	13.467	1.21925	13.467	1.9124	13.4667	1.83895	13.4668	1.5587	13.4667	1.6317	13.467	1.54385	13.467	1.5268
13.4752	0.92935	13.4753	1.22095	13.4753	1.9288	13.475	1.85435	13.4752	1.57065	13.475	1.6445	13.4753	1.5461	13.4753	1.5304
13.4835	0.92615	13.4837	1.22415	13.4837	1.9463	13.4833	1.86725	13.4835	1.58455	13.4833	1.65925	13.4837	1.5489	13.4837	1.5333
13.4918	0.92125	13.492	1.22875	13.492	1.9668	13.4917	1.88515	13.4918	1.60245	13.4917	1.6752	13.492	1.55285	13.492	1.5407
13.5002	0.9188	13.5003	1.2327	13.5003	1.98835	13.5	1.90105	13.5002	1.62005	13.5	1.69215	13.5003	1.5608	13.5003	1.5503
13.5085	0.9174	13.5087	1.2377	13.5087	2.0112	13.5083	1.9129	13.5085	1.64025	13.5083	1.71055	13.5087	1.56795	13.5087	1.558
13.5168	0.91595	13.517	1.2448	13.517	2.03375	13.5167	1.92745	13.5168	1.6614	13.5167	1.72655	13.517	1.57615	13.517	1.5697
13.5252	0.91205	13.5253	1.25335	13.5253	2.0571	13.525	1.94525	13.5252	1.6857	13.525	1.7449	13.5253	1.58625	13.5253	1.58195
13.5335	0.91025	13.5337	1.26155	13.5337	2.07895	13.5333	1.95715	13.5335	1.70695	13.5333	1.75725	13.5337	1.5953	13.5337	1.59325
13.5418	0.9097	13.542	1.27005	13.542	2.10175	13.5417	1.9687	13.5418	1.73035	13.5417	1.77315	13.542	1.6076	13.542	1.60745
13.5502	0.908	13.5503	1.2783	13.5503	2.12485	13.55	1.9816	13.5502	1.75465	13.55	1.7907	13.5503	1.62435	13.5503	1.6215
13.5585	0.9088	13.5587	1.2909	13.5587	2.1463	13.5583	1.99355	13.5585	1.78055	13.5583	1.80345	13.5587	1.6391	13.5587	1.6351
13.5668	0.907	13.567	1.30295	13.567	2.1643	13.5667	2.0044	13.5668	1.80285	13.5667	1.8171	13.567	1.6552	13.567	1.65125
13.5752	0.9042	13.5753	1.31095	13.5753	2.18265	13.575	2.01325	13.5752	1.82375	13.575	1.82955	13.5753	1.6694	13.5753	1.66415
13.5835	0.9031	13.5837	1.32245	13.5837	2.20015	13.5833	2.02465	13.5835	1.84665	13.5833	1.84245	13.5837	1.68765	13.5837	1.67915
13.5918	0.898	13.592	1.3326	13.592	2.2185	13.5917	2.03525	13.5918	1.868	13.5917	1.85425	13.592	1.7018	13.592	1.6935
13.6002	0.89825	13.6003	1.34225	13.6003	2.2355	13.6	2.04845	13.6002	1.8896	13.6	1.86755	13.6003	1.7186	13.6003	1.70765
13.6085	0.89885	13.6087	1.354	13.6087	2.25215	13.6083	2.06275	13.6085	1.90935	13.6083	1.8801	13.6087	1.73695	13.6087	1.72115
13.6168	0.89965	13.617	1.36665	13.617	2.2668	13.6167	2.0764	13.6168	1.9315	13.6167	1.8918	13.617	1.7512	13.617	1.73325
13.6252	0.8971	13.6253	1.3754	13.6253	2.28325	13.625	2.0928	13.6252	1.95395	13.625	1.90435	13.6253	1.7666	13.6253	1.74615
13.6335	0.8953	13.6337	1.38695	13.6337	2.2996	13.6333	2.11115	13.6335	1.9756	13.6333	1.91555	13.6337	1.7821	13.6337	1.75665
13.6418	0.8939	13.642	1.39645	13.642	2.3148	13.6417	2.13085	13.6418	1.99885	13.6417	1.9269	13.642	1.797	13.642	1.76565
13.6502	0.8949	13.6503	1.4076	13.6503	2.3306	13.65	2.1567	13.6502	2.02355	13.65	1.9393	13.6503	1.809	13.6503	1.7773
13.6585	0.8948	13.6587	1.41925	13.6587	2.3482	13.6583	2.18365	13.6585	2.0535	13.6583	1.95375	13.6587	1.82335	13.6587	1.78645
13.6668	0.8937	13.667	1.4319	13.667	2.36895	13.6667	2.2151	13.6668	2.0854	13.6667	1.9668	13.667	1.83675	13.667	1.79605
13.6752	0.8948	13.6753	1.44535	13.6753	2.38825	13.675	2.25015	13.6752	2.1219	13.675	1.98245	13.6753	1.84915	13.6753	1.8048
13.6835	0.89405	13.6837	1.4582	13.6837	2.41125	13.6833	2.29245	13.6835	2.16315	13.6833	1.99885	13.6837	1.8612	13.6837	1.815
13.6918	0.8936	13.692	1.47245	13.692	2.4382	13.6917	2.3399	13.6918	2.20785	13.6917	2.0182	13.692	1.87465	13.692	1.82785
13.7002	0.89295	13.7003	1.4878	13.7003	2.46625	13.7	2.3909	13.7002	2.2554	13.7	2.0396	13.7003	1.8854	13.7003	1.83865
13.7085	0.8934	13.7087	1.5053	13.7087	2.49985	13.7083	2.44795	13.7085	2.30695	13.7083	2.06375	13.7087	1.8983	13.7087	1.8494
13.7168	0.89365	13.717	1.52265	13.717	2.535	13.7167	2.50915	13.7168	2.35985	13.7167	2.08955	13.717	1.9102	13.717	1.8613
13.7252	0.89405	13.7253	1.54105	13.7253	2.5783	13.725	2.5717	13.7252	2.41165	13.725	2.11825	13.7253	1.92415	13.7253	1.8732
13.7335	0.8941	13.7337	1.55955	13.7337	2.62565	13.7333	2.63405	13.7335	2.46235	13.7333	2.1498	13.7337	1.9364	13.7337	1.88565
13.7418	0.89505	13.742	1.5797	13.742	2.6777	13.7417	2.694	13.7418	2.51025	13.7417	2.1847	13.742	1.95085	13.742	1.8998
13.7502	0.8949	13.7503	1.60415	13.7503	2.7377	13.75	2.75215	13.7502	2.5525	13.75	2.22105	13.7503	1.9691	13.7503	1.9177
13.7585	0.8953	13.7587	1.62505	13.7587	2.80325	13.7583	2.8031	13.7585	2.5891	13.7583	2.25995	13.7587	1.9866	13.7587	1.9368
13.7668	0.89485	13.767	1.64755	13.767	2.8742	13.7667	2.8479	13.7668	2.61685	13.7667	2.2987	13.767	2.00675	13.767	1.95555
13.7752	0.8948	13.7753	1.6728	13.7753	2.94855	13.775	2.88365	13.7752	2.6381	13.775	2.3383	13.7753	2.0282	13.7753	1.9789
13.7835	0.89485	13.7837	1.70075	13.7837	3.03015	13.7833	2.9127	13.7835	2.65155	13.7833	2.3789	13.7837	2.0538	13.7837	2.00705
13.7918	0.8938	13.792	1.72875	13.792	3.10965	13.7917	2.93075	13.7918	2.6536	13.7917	2.41765	13.792	2.0805	13.792	2.03845
13.8002	0.89525	13.8003	1.7615	13.8003	3.18825	13.8	2.9366	13.8002	2.6463	13.8	2.4506	13.8003	2.10945	13.8003	2.0704
13.8085	0.8952	13.8087	1.796	13.8087	3.2642	13.8083	2.93505	13.8085	2.632	13.8083	2.48085	13.8087	2.1412	13.8087	2.1087
13.8168	0.8931	13.817	1.8294	13.817	3.33425	13.8167	2.9197	13.8168	2.6079	13.8167	2.5039	13.817	2.1741	13.817	2.1489
13.8252	0.89415	13.8253	1.8675	13.8253	3.39545	13.825	2.89705	13.8252	2.5776	13.825	2.5209	13.8253	2.2097	13.8253	2.19135
13.8335	0.8937	13.8337	1.90375	13.8337	3.44605	13.8333	2.86475	13.8335	2.5386	13.8333	2.53055	13.8337	2.24325	13.8337	2.23545
13.8418	0.8925	13.842	1.9392	13.842	3.4863	13.8417	2.82605	13.8418	2.49625	13.8417	2.53225	13.842	2.2761	13.842	2.28225
13.8502	0.8925	13.8503	1.97665	13.8503	3.51375	13.85	2.7795	13.8502	2.4476	13.85	2.52765	13.8503	2.3075	13.8503	2.3281
13.8585	0.89385	13.8587	2.0109	13.8587	3.52745	13.8583	2.7276	13.8585	2.3973	13.8583	2.51505	13.8587	2.3342	13.8587	2.3736
13.8668	0.8944	13.867	2.0414	13.867	3.5293	13.8667	2.6715	13.8668	2.34235	13.8667	2.49455	13.867	2.35825	13.867	2.4155
13.8752	0.8932	13.8753	2.06965	13.8753	3.52	13.875	2.61275	13.8752	2.28635	13.875	2.4682	13.8753	2.37945	13.8753	2.45725
13.8835	0.89335	13.8837	2.0932	13.8837	3.4967	13.8833	2.5547	13.8835	2.2302	13.8833	2.4375	13.8837	2.39435	13.8837	2.4915
13.8918	0.8931	13.892	2.1124	13.892	3.4632	13.8917	2.49345	13.8918	2.17255	13.8917	2.3995	13.892	2.40125	13.892	2.5184
13.9002	0.89695	13.9003	2.1262	13.9003	3.41925	13.9	2.43315	13.9002	2.116	13.9	2.3583	13.9003	2.4033	13.9003	2.53995
13.9085	0.89715	13.9087	2.1316	13.9087	3.36615	13.9083	2.3739	13.9085	2.0589	13.9083	2.31295	13.9087	2.3985	13.9087	2.55305
13.9168	0.89825	13.917	2.133	13.917	3.3061	13.9167	2.31325	13.9168	2.00535	13.9167	2.2633	13.917	2.3844	13.917	2.55805
13.9252	0.8977	13.9253	2.1257	13.9253	3.24045	13.925	2.25605	13.9252	1.9537	13.925	2.21495	13.9253	2.36825	13.9253	2.5562
13.9335	0.8993	13.9337	2.11345	13.9337	3.16855	13.9333	2.1994	13.9335	1.905	13.9333	2.1626	13.9337	2.34745	13.9337	2.5448
13.9418	0.89895	13.942	2.09525	13.942	3.09215	13.9417	2.14735	13.9418	1.8569	13.9417	2.11045	13.942	2.3173	13.942	2.5255
13.9502	0.89815	13.9503	2.06905	13.9503	3.0155	13.95	2.0981	13.9502	1.812	13.95	2.05955	13.9503	2.2863	13.9503	2.5009
13.9585	0.89785	13.9587	2.03975	13.9587	2.9369	13.9583	2.049	13.9585	1.77095	13.9583	2.00785	13.9587	2.2482	13.9587	2.4692
13.9668	0.89345	13.967	2.00605	13.967	2.8579	13.9667	2.0058	13.9668	1.73275	13.9667	1.95865	13.967	2.209	13.967	2.43165
13.9752	0.89325	13.9753	1.9697	13.9753	2.7772	13.975	1.96385	13.9752	1.69605	13.975	1.91095	13.9753	2.16545	13.9753	2.3879
13.9835	0.8865	13.9837	1.93065	13.9837	2.7002	13.9833	1.928	13.9835	1.66505	13.9833	1.8663	13.9837	2.123	13.9837	2.34255
13.9918	0.8915	13.992	1.8889	13.992	2.624	13.9917	1.8939	13.9918	1.63415	13.9917	1.8221	13.992	2.0778	13.992	2.29435
14.0002	0.9184	14.0003	1.8461	14.0003	2.5484	14	1.86175	14.0002	1.60615	14	1.7807	14.0003	2.03135	14.0003	2.24305
14.0085	0.89915	14.0087	1.8034	14.0087	2.4758	14.0083	1.834	14.0085	1.5793	14.0083	1.74225	14.0087	1.98715	14.0087	2.19055
14.0168	0.90435	14.017	1.7555	14.017	2.40625	14.0167	1.80735	14.0168	1.55505	14.0167	1.70465	14.017	1.9395	14.017	2.13615
14.0252	0.89675	14.0253	1.71345	14.0253	2.341	14.025	1.78395	14.0252	1.53665	14.025	1.67225	14.0253	1.89825	14.0253	2.0842
14.0335	0.8937	14.0337	1.6694	14.0337	2.2774	14.0333	1.763	14.0335	1.51585	14.0333	1.63895	14.0337	1.8554	14.0337	2.0308
14.0418	0.9096	14.042	1.6277	14.042	2.21845	14.0417	1.74255	14.0418	1.4988	14.0417	1.60945	14.042	1.8139	14.042	1.9792
14.0502	0.9355	14.0503	1.58595	14.0503	2.16395	14.05	1.7247	14.0502	1.47995	14.05	1.58305	14.0503	1.7733	14.0503	1.9301
14.0585	0.86245	14.0587	1.5501	14.0587	2.1106	14.0583	1.709	14.0585	1.46625	14.0583	1.5573	14.0587	1.73735	14.0587	1.883
14.0668	0.90405	14.067	1.51015	14.067	2.0669	14.0667	1.69445	14.0668	1.45145	14.0667	1.53445	14.067	1.70395	14.067	1.8386
14.0752	0.8118	14.0753	1.475	14.0753	2.02335	14.075	1.6822	14.0752	1.4389	14.075	1.5149	14.0753	1.6734	14.0753	1.7961
14.0835	0.90025	14.0837	1.44375	14.0837	1.9838	14.0833	1.6706	14.0835	1.42775	14.0833	1.49515	14.0837	1.6439	14.0837	1.75615
14.0918	0.89815	14.092	1.41315	14.092	1.9454	14.0917	1.6605	14.0918	1.4152	14.0917	1.47885	14.092	1.61505	14.092	1.7178
14.1002	0.8986	14.1003	1.38545	14.1003	1.90835	14.1	1.6497	14.1002	1.40185	14.1	1.46145	14.1003	1.5868	14.1003	1.6777
14.1085	0.8969	14.1087	1.35875	14.1087	1.8819	14.1083	1.6431	14.1085	1.39525	14.1083	1.4493	14.1087	1.56605	14.1087	1.6482
14.1168	0.89615	14.117	1.3335	14.117	1.85305	14.1167	1.63465	14.1168	1.3867	14.1167	1.43575	14.117	1.5428	14.117	1.61685
14.1252	0.8978	14.1253	1.3138	14.1253	1.82655	14.125	1.62695	14.1252	1.3775	14.125	1.4227	14.1253	1.52375	14.1253	1.5898
14.1335	0.89545	14.1337	1.2919	14.1337	1.8051	14.1333	1.6214	14.1335	1.37235	14.1333	1.41455	14.1337	1.50705	14.1337	1.5649
14.1418	0.89435	14.142	1.27355	14.142	1.7838	14.1417	1.61355	14.1418	1.3647	14.1417	1.4032	14.142	1.4881	14.142	1.54155
14.1502	0.8935	14.1503	1.2553	14.1503	1.76455	14.15	1.6094	14.1502	1.3575	14.15	1.3946	14.1503	1.47245	14.1503	1.521
14.1585	0.89335	14.1587	1.23885	14.1587	1.7492	14.1583	1.6055	14.1585	1.35295	14.1583	1.3866	14.1587	1.46015	14.1587	1.5031
14.1668	0.86335	14.167	1.22525	14.167	1.73585	14.1667	1.5995	14.1668	1.34685	14.1667	1.3814	14.167	1.44765	14.167	1.48495
14.1752	0.8795	14.1753	1.2119	14.1753	1.7223	14.175	1.59485	14.1752	1.34435	14.175	1.3763	14.1753	1.4344	14.1753	1.4694
14.1835	0.8849	14.1837	1.1999	14.1837	1.70905	14.1833	1.59185	14.1835	1.3411	14.1833	1.3705	14.1837	1.4252	14.1837	1.45785
14.1918	0.8867	14.192	1.18995	14.192	1.69795	14.1917	1.58965	14.1918	1.3388	14.1917	1.36575	14.192	1.4174	14.192	1.4476
14.2002	0.8872	14.2003	1.17935	14.2003	1.6864	14.2	1.58395	14.2002	1.33325	14.2	1.3595	14.2003	1.4059	14.2003	1.43255
14.2085	0.88755	14.2087	1.17015	14.2087	1.67815	14.2083	1.58405	14.2085	1.33055	14.2083	1.35615	14.2087	1.39925	14.2087	1.42395
14.2168	0.8857	14.217	1.16115	14.217	1.66935	14.2167	1.5807	14.2168	1.32855	14.2167	1.35165	14.217	1.3936	14.217	1.4138
14.2252	0.8843	14.2253	1.15255	14.2253	1.6628	14.225	1.5798	14.2252	1.32685	14.225	1.3488	14.2253	1.38645	14.2253	1.407
14.2335	0.88425	14.2337	1.1436	14.2337	1.6536	14.2333	1.57625	14.2335	1.32355	14.2333	1.3435	14.2337	1.3795	14.2337	1.3979
14.2418	0.88305	14.242	1.13705	14.242	1.6478	14.2417	1.57465	14.2418	1.3228	14.2417	1.34055	14.242	1.37435	14.242	1.3918
14.2502	0.88385	14.2503	1.13105	14.2503	1.64285	14.25	1.57395	14.2502	1.3219	14.25	1.3395	14.2503	1.3712	14.2503	1.3856
14.2585	0.8854	14.2587	1.12555	14.2587	1.63635	14.2583	1.57245	14.2585	1.3211	14.2583	1.33675	14.2587	1.3671	14.2587	1.38035
14.2668	0.88245	14.267	1.11985	14.267	1.6316	14.2667	1.5725	14.2668	1.31915	14.2667	1.3339	14.267	1.36175	14.267	1.3753
14.2752	0.88325	14.2753	1.11595	14.2753	1.62705	14.275	1.57185	14.2752	1.317	14.275	1.3329	14.2753	1.36	14.2753	1.3716
14.2835	0.8798	14.2837	1.11135	14.2837	1.6218	14.2833	1.571	14.2835	1.316	14.2833	1.3305	14.2837	1.35585	14.2837	1.36535
14.2918	0.8825	14.292	1.1077	14.292	1.6177	14.2917	1.5701	14.2918	1.31275	14.2917	1.3278	14.292	1.35055	14.292	1.36055
14.3002	0.88335	14.3003	1.10255	14.3003	1.61285	14.3	1.56845	14.3002	1.3109	14.3	1.3258	14.3003	1.34865	14.3003	1.35365
14.3085	0.8789	14.3087	1.1005	14.3087	1.6091	14.3083	1.5676	14.3085	1.3097	14.3083	1.3231	14.3087	1.34655	14.3087	1.35125
14.3168	0.88335	14.317	1.09905	14.317	1.6062	14.3167	1.56795	14.3168	1.30865	14.3167	1.3225	14.317	1.3438	14.317	1.3483
14.3252	0.8828	14.3253	1.09685	14.3253	1.60225	14.325	1.56735	14.3252	1.30845	14.325	1.32	14.3253	1.343	14.3253	1.34445
14.3335	0.88365	14.3337	1.09525	14.3337	1.5979	14.3333	1.56655	14.3335	1.30735	14.3333	1.31795	14.3337	1.34095	14.3337	1.34065
14.3418	0.88075	14.342	1.0935	14.342	1.59695	14.3417	1.56685	14.3418	1.3059	14.3417	1.318	14.342	1.3366	14.342	1.33755
14.3502	0.8791	14.3503	1.09125	14.3503	1.5962	14.35	1.56715	14.3502	1.30555	14.35	1.31795	14.3503	1.33655	14.3503	1.33615
14.3585	0.89515	14.3587	1.0889	14.3587	1.5929	14.3583	1.56415	14.3585	1.30265	14.3583	1.3148	14.3587	1.3305	14.3587	1.33215
14.3668	0.89185	14.367	1.08835	14.367	1.5923	14.3667	1.565	14.3668	1.30475	14.3667	1.31515	14.367	1.331	14.367	1.33135
14.3752	0.86125	14.3753	1.0888	14.3753	1.5919	14.375	1.568	14.3752	1.30325	14.375	1.31515	14.3753	1.3315	14.3753	1.3309
14.3835	0.8491	14.3837	1.08365	14.3837	1.59065	14.3833	1.56765	14.3835	1.30285	14.3833	1.3127	14.3837	1.32985	14.3837	1.3288
14.3918	0.9186	14.392	1.0844	14.392	1.5891	14.3917	1.5681	14.3918	1.3034	14.3917	1.3116	14.392	1.3283	14.392	1.32725
14.4002	0.88335	14.4003	1.0812	14.4003	1.5864	14.4	1.56895	14.4002	1.30335	14.4	1.31095	14.4003	1.3273	14.4003	1.32385
14.4085	0.8836	14.4087	1.08005	14.4087	1.58505	14.4083	1.56905	14.4085	1.3022	14.4083	1.31015	14.4087	1.32675	14.4087	1.323
14.4168	0.8834	14.417	1.07805	14.417	1.5841	14.4167	1.5682	14.4168	1.3003	14.4167	1.3069	14.417	1.32385	14.417	1.32035
14.4252	0.87785	14.4253	1.07615	14.4253	1.58125	14.425	1.56785	14.4252	1.29925	14.425	1.3046	14.4253	1.3214	14.4253	1.31905
14.4335	0.87695	14.4337	1.075	14.4337	1.58215	14.4333	1.5701	14.4335	1.30305	14.4333	1.30605	14.4337	1.3227	14.4337	1.3193
14.4418	0.8767	14.442	1.0716	14.442	1.5816	14.4417	1.56985	14.4418	1.30015	14.4417	1.3037	14.442	1.3226	14.442	1.31655
14.4502	0.87715	14.4503	1.07125	14.4503	1.5797	14.45	1.56995	14.4502	1.29985	14.45	1.3043	14.4503	1.3216	14.4503	1.31845
14.4585	0.8789	14.4587	1.071	14.4587	1.57935	14.4583	1.57105	14.4585	1.2981	14.4583	1.30365	14.4587	1.3193	14.4587	1.31715
14.4668	0.8782	14.467	1.0696	14.467	1.5793	14.4667	1.57055	14.4668	1.29835	14.4667	1.30365	14.467	1.31995	14.467	1.31555
14.4752	0.87675	14.4753	1.0659	14.4753	1.5779	14.475	1.5715	14.4752	1.29635	14.475	1.3016	14.4753	1.3182	14.4753	1.3136
14.4835	0.87515	14.4837	1.0655	14.4837	1.57655	14.4833	1.5697	14.4835	1.29455	14.4833	1.30255	14.4837	1.31625	14.4837	1.31235
14.4918	0.8299	14.492	1.0655	14.492	1.57355	14.4917	1.56835	14.4918	1.2926	14.4917	1.29925	14.492	1.31545	14.492	1.3091
14.5002	0.8977	14.5003	1.0665	14.5003	1.573	14.5	1.5674	14.5002	1.2906	14.5	1.29725	14.5003	1.3149	14.5003	1.3086
14.5085	0.8863	14.5087	1.06595	14.5087	1.5715	14.5083	1.5679	14.5085	1.2908	14.5083	1.29665	14.5087	1.31495	14.5087	1.30615
14.5168	0.8818	14.517	1.0631	14.517	1.56815	14.5167	1.56545	14.5168	1.28845	14.5167	1.29295	14.517	1.3127	14.517	1.3048
14.5252	0.88295	14.5253	1.06385	14.5253	1.57005	14.525	1.56645	14.5252	1.2893	14.525	1.2945	14.5253	1.31375	14.5253	1.30585
14.5335	0.8809	14.5337	1.0631	14.5337	1.57185	14.5333	1.56615	14.5335	1.2885	14.5333	1.29395	14.5337	1.31335	14.5337	1.30445
14.5418	0.87905	14.542	1.058	14.542	1.57135	14.5417	1.56305	14.5418	1.28635	14.5417	1.29235	14.542	1.3119	14.542	1.30275
14.5502	0.87855	14.5503	1.058	14.5503	1.5719	14.55	1.56345	14.5502	1.2872	14.55	1.29305	14.5503	1.3122	14.5503	1.3032
14.5585	0.8785	14.5587	1.0576	14.5587	1.57165	14.5583	1.5639	14.5585	1.2868	14.5583	1.2917	14.5587	1.3109	14.5587	1.3037
14.5668	0.87865	14.567	1.058	14.567	1.57095	14.5667	1.56195	14.5668	1.2865	14.5667	1.29195	14.567	1.30985	14.567	1.3028
14.5752	0.87755	14.5753	1.0559	14.5753	1.57075	14.575	1.561	14.5752	1.2849	14.575	1.2916	14.5753	1.3107	14.5753	1.30235
14.5835	0.8762	14.5837	1.05455	14.5837	1.5684	14.5833	1.5581	14.5835	1.28395	14.5833	1.28935	14.5837	1.30915	14.5837	1.3024
14.5918	0.8761	14.592	1.05255	14.592	1.56805	14.5917	1.55775	14.5918	1.283	14.5917	1.28835	14.592	1.30895	14.592	1.30235
14.6002	0.8389	14.6003	1.05105	14.6003	1.5678	14.6	1.5586	14.6002	1.28395	14.6	1.289	14.6003	1.30965	14.6003	1.3016
14.6085	0.8868	14.6087	1.05045	14.6087	1.56785	14.6083	1.55735	14.6085	1.28255	14.6083	1.2865	14.6087	1.3095	14.6087	1.3022
14.6168	0.8804	14.617	1.0478	14.617	1.56745	14.6167	1.55515	14.6168	1.28205	14.6167	1.28585	14.617	1.3104	14.617	1.3017
14.6252	0.8797	14.6253	1.0487	14.6253	1.5693	14.625	1.55715	14.6252	1.28345	14.625	1.28725	14.6253	1.31185	14.6253	1.3042
14.6335	0.87985	14.6337	1.04815	14.6337	1.56575	14.6333	1.55325	14.6335	1.28085	14.6333	1.2854	14.6337	1.31025	14.6337	1.30305
14.6418	0.8794	14.642	1.0475	14.642	1.56665	14.6417	1.5533	14.6418	1.2805	14.6417	1.28475	14.642	1.3097	14.642	1.3042
14.6502	0.8777	14.6503	1.0436	14.6503	1.5642	14.65	1.552	14.6502	1.2774	14.65	1.2834	14.6503	1.3075	14.6503	1.30275
14.6585	0.8769	14.6587	1.04265	14.6587	1.5641	14.6583	1.55105	14.6585	1.27655	14.6583	1.2839	14.6587	1.3055	14.6587	1.30055
14.6668	0.8762	14.667	1.0424	14.667	1.5637	14.6667	1.55055	14.6668	1.27535	14.6667	1.2824	14.667	1.3058	14.667	1.29995
14.6752	0.87555	14.6753	1.0397	14.6753	1.56405	14.675	1.5518	14.6752	1.27335	14.675	1.28185	14.6753	1.30635	14.6753	1.29945
14.6835	0.8772	14.6837	1.04095	14.6837	1.5619	14.6833	1.55235	14.6835	1.2716	14.6833	1.2803	14.6837	1.3051	14.6837	1.2962
14.6918	0.8782	14.692	1.0414	14.692	1.56465	14.6917	1.5538	14.6918	1.27245	14.6917	1.28195	14.692	1.3065	14.692	1.2987
14.7002	0.87615	14.7003	1.03945	14.7003	1.5607	14.7	1.55505	14.7002	1.2703	14.7	1.2812	14.7003	1.3042	14.7003	1.29535
14.7085	0.8573	14.7087	1.0383	14.7087	1.561	14.7083	1.55685	14.7085	1.2681	14.7083	1.2795	14.7087	1.30315	14.7087	1.2947
14.7168	0.87635	14.717	1.0369	14.717	1.5633	14.7167	1.5611	14.7168	1.26765	14.7167	1.2829	14.717	1.3047	14.717	1.2952
14.7252	0.8732	14.7253	1.0363	14.7253	1.56505	14.725	1.5705	14.7252	1.26675	14.725	1.2871	14.7253	1.30425	14.7253	1.29535
14.7335	0.87125	14.7337	1.0344	14.7337	1.56715	14.7333	1.5777	14.7335	1.2661	14.7333	1.2903	14.7337	1.3027	14.7337	1.29485
14.7418	0.87165	14.742	1.03455	14.742	1.56895	14.7417	1.58945	14.7418	1.26725	14.7417	1.2964	14.742	1.30185	14.742	1.2953
14.7502	0.8702	14.7503	1.0338	14.7503	1.57125	14.75	1.602	14.7502	1.26775	14.75	1.30085	14.7503	1.3006	14.7503	1.29685
14.7585	0.87175	14.7587	1.035	14.7587	1.57555	14.7583	1.61835	14.7585	1.268	14.7583	1.30865	14.7587	1.30165	14.7587	1.29865
14.7668	0.8702	14.767	1.0359	14.767	1.5801	14.7667	1.63705	14.7668	1.26945	14.7667	1.31925	14.767	1.30185	14.767	1.29795
14.7752	0.86915	14.7753	1.035	14.7753	1.58815	14.775	1.65845	14.7752	1.2723	14.775	1.33205	14.7753	1.3024	14.7753	1.3014
14.7835	0.8706	14.7837	1.0365	14.7837	1.5964	14.7833	1.6835	14.7835	1.27715	14.7833	1.34695	14.7837	1.3028	14.7837	1.30185
14.7918	0.8689	14.792	1.03725	14.792	1.6067	14.7917	1.71135	14.7918	1.2813	14.7917	1.3655	14.792	1.3031	14.792	1.3056
14.8002	0.86875	14.8003	1.03625	14.8003	1.62015	14.8	1.74025	14.8002	1.28845	14.8	1.3883	14.8003	1.30505	14.8003	1.30985
14.8085	0.8667	14.8087	1.03955	14.8087	1.63655	14.8083	1.772	14.8085	1.2994	14.8083	1.4129	14.8087	1.30805	14.8087	1.3159
14.8168	0.87075	14.817	1.0431	14.817	1.65565	14.8167	1.80565	14.8168	1.3116	14.8167	1.44295	14.817	1.3114	14.817	1.32345
14.8252	0.86725	14.8253	1.04715	14.8253	1.677	14.825	1.8379	14.8252	1.3262	14.825	1.4725	14.8253	1.315	14.8253	1.33105
14.8335	0.86775	14.8337	1.0531	14.8337	1.70235	14.8333	1.8719	14.8335	1.34465	14.8333	1.5072	14.8337	1.31915	14.8337	1.34215
14.8418	0.86725	14.842	1.0608	14.842	1.73	14.8417	1.90445	14.8418	1.36725	14.8417	1.5434	14.842	1.32535	14.842	1.35375
14.8502	0.8686	14.8503	1.06905	14.8503	1.76035	14.85	1.93615	14.8502	1.39065	14.85	1.57845	14.8503	1.33305	14.8503	1.36745
14.8585	0.86805	14.8587	1.0788	14.8587	1.79475	14.8583	1.96415	14.8585	1.42075	14.8583	1.617	14.8587	1.34615	14.8587	1.38595
14.8668	0.86935	14.867	1.0907	14.867	1.8311	14.8667	1.9919	14.8668	1.454	14.8667	1.65365	14.867	1.35825	14.867	1.406
14.8752	0.866	14.8753	1.10455	14.8753	1.869	14.875	2.01405	14.8752	1.49055	14.875	1.6883	14.8753	1.37525	14.8753	1.42985
14.8835	0.86785	14.8837	1.1219	14.8837	1.9054	14.8833	2.035	14.8835	1.5304	14.8833	1.7225	14.8837	1.3951	14.8837	1.4585
14.8918	0.8668	14.892	1.13815	14.892	1.9422	14.8917	2.0513	14.8918	1.5727	14.8917	1.7516	14.892	1.41725	14.892	1.48665
14.9002	0.8654	14.9003	1.15635	14.9003	1.976	14.9	2.06225	14.9002	1.61195	14.9	1.77525	14.9003	1.4402	14.9003	1.5167
14.9085	0.86545	14.9087	1.1763	14.9087	2.0099	14.9083	2.07165	14.9085	1.65425	14.9083	1.80155	14.9087	1.46815	14.9087	1.54815
14.9168	0.86615	14.917	1.197	14.917	2.0427	14.9167	2.0803	14.9168	1.6979	14.9167	1.8237	14.917	1.5024	14.917	1.58485
14.9252	0.86855	14.9253	1.21915	14.9253	2.07195	14.925	2.083	14.9252	1.7362	14.925	1.8416	14.9253	1.53625	14.9253	1.6206
14.9335	0.86615	14.9337	1.24385	14.9337	2.09635	14.9333	2.08335	14.9335	1.7733	14.9333	1.8575	14.9337	1.57225	14.9337	1.6541
14.9418	0.8664	14.942	1.26765	14.942	2.11795	14.9417	2.0809	14.9418	1.80615	14.9417	1.8684	14.942	1.609	14.942	1.6865
14.9502	0.8655	14.9503	1.2875	14.9503	2.1341	14.95	2.0767	14.9502	1.83555	14.95	1.8778	14.9503	1.64455	14.9503	1.71685
14.9585	0.8641	14.9587	1.30755	14.9587	2.1467	14.9583	2.07045	14.9585	1.8613	14.9583	1.88455	14.9587	1.6826	14.9587	1.7458
14.9668	0.8634	14.967	1.3272	14.967	2.1552	14.9667	2.06335	14.9668	1.88155	14.9667	1.8894	14.967	1.716	14.967	1.7705
14.9752	0.86245	14.9753	1.3442	14.9753	2.1622	14.975	2.0542	14.9752	1.9005	14.975	1.89215	14.9753	1.74965	14.9753	1.7932
14.9835	0.8624	14.9837	1.3593	14.9837	2.16475	14.9833	2.0433	14.9835	1.9152	14.9833	1.89145	14.9837	1.7795	14.9837	1.81315
14.9918	0.86635	14.992	1.3784	14.992	2.16445	14.9917	2.0299	14.9918	1.9238	14.9917	1.8893	14.992	1.8051	14.992	1.8256
15.0002	0.865	15.0003	1.39105	15.0003	2.1633	15	2.01945	15.0002	1.93125	15	1.8875	15.0003	1.8337	15.0003	1.84165
15.0085	0.86365	15.0087	1.4034	15.0087	2.15925	15.0083	2.00805	15.0085	1.9329	15.0083	1.8844	15.0087	1.85355	15.0087	1.8511
15.0168	0.86425	15.017	1.41455	15.017	2.15085	15.0167	1.99305	15.0168	1.93	15.0167	1.8774	15.017	1.87005	15.017	1.8561
15.0252	0.8648	15.0253	1.4241	15.0253	2.1442	15.025	1.983	15.0252	1.9266	15.025	1.8724	15.0253	1.88405	15.0253	1.86065
15.0335	0.866	15.0337	1.4325	15.0337	2.1344	15.0333	1.97315	15.0335	1.91865	15.0333	1.8664	15.0337	1.89515	15.0337	1.86265
15.0418	0.86575	15.042	1.43765	15.042	2.12365	15.0417	1.9604	15.0418	1.90675	15.0417	1.8572	15.042	1.9008	15.042	1.85815
15.0502	0.8686	15.0503	1.44235	15.0503	2.11335	15.05	1.9513	15.0502	1.89915	15.05	1.85005	15.0503	1.9088	15.0503	1.85665
15.0585	0.8693	15.0587	1.44755	15.0587	2.1011	15.0583	1.9424	15.0585	1.88975	15.0583	1.84045	15.0587	1.91235	15.0587	1.8518
15.0668	0.87195	15.067	1.45095	15.067	2.09035	15.0667	1.93515	15.0668	1.87935	15.0667	1.83185	15.067	1.9138	15.067	1.84805
15.0752	0.8717	15.0753	1.4529	15.0753	2.07735	15.075	1.92885	15.0752	1.8692	15.075	1.82305	15.0753	1.91315	15.0753	1.84
15.0835	0.87275	15.0837	1.45315	15.0837	2.06725	15.0833	1.9255	15.0835	1.8611	15.0833	1.81575	15.0837	1.90955	15.0837	1.83285
15.0918	0.8725	15.092	1.4522	15.092	2.05745	15.0917	1.9229	15.0918	1.8538	15.0917	1.80995	15.092	1.9064	15.092	1.8256
15.1002	0.87245	15.1003	1.4515	15.1003	2.0485	15.1	1.9231	15.1002	1.84705	15.1	1.8062	15.1003	1.90115	15.1003	1.8174
15.1085	0.8729	15.1087	1.45135	15.1087	2.04	15.1083	1.9244	15.1085	1.84055	15.1083	1.80035	15.1087	1.8939	15.1087	1.80775
15.1168	0.87305	15.117	1.4486	15.117	2.0325	15.1167	1.9284	15.1168	1.8366	15.1167	1.7969	15.117	1.88785	15.117	1.79855
15.1252	0.87025	15.1253	1.44765	15.1253	2.024	15.125	1.93465	15.1252	1.83375	15.125	1.79455	15.1253	1.88095	15.1253	1.78835
15.1335	0.87255	15.1337	1.4458	15.1337	2.0179	15.1333	1.94135	15.1335	1.83185	15.1333	1.79445	15.1337	1.8727	15.1337	1.77735
15.1418	0.8729	15.142	1.4457	15.142	2.0131	15.1417	1.9507	15.1418	1.83265	15.1417	1.79455	15.142	1.8616	15.142	1.7835
15.1502	0.8756	15.1503	1.44425	15.1503	2.01155	15.15	1.96315	15.1502	1.8362	15.15	1.7979	15.1503	1.85465	15.1503	1.7597
15.1585	0.8743	15.1587	1.4433	15.1587	2.0094	15.1583	1.9788	15.1585	1.8404	15.1583	1.80525	15.1587	1.84655	15.1587	1.75065
15.1668	0.8767	15.167	1.4428	15.167	2.01045	15.1667	1.99835	15.1668	1.8485	15.1667	1.81405	15.167	1.8397	15.167	1.76875
15.1752	0.88005	15.1753	1.44125	15.1753	2.01225	15.175	2.0195	15.1752	1.86125	15.175	1.8246	15.1753	1.83285	15.1753	1.75715
15.1835	0.8794	15.1837	1.44335	15.1837	2.01525	15.1833	2.0433	15.1835	1.87415	15.1833	1.8388	15.1837	1.82695	15.1837	1.7456
15.1918	0.87975	15.192	1.4465	15.192	2.0238	15.1917	2.0766	15.1918	1.8963	15.1917	1.8642	15.192	1.8262	15.192	1.7452
15.2002	0.88185	15.2003	1.44935	15.2003	2.03375	15.2	2.1111	15.2002	1.921	15.2	1.89025	15.2003	1.82425	15.2003	1.75085
15.2085	0.8831	15.2087	1.45535	15.2087	2.0491	15.2083	2.15065	15.2085	1.9502	15.2083	1.92165	15.2087	1.8238	15.2087	1.7524
15.2168	0.8837	15.217	1.46245	15.217	2.06555	15.2167	2.19555	15.2168	1.98385	15.2167	1.9573	15.217	1.8265	15.217	1.7576
15.2252	0.88575	15.2253	1.47245	15.2253	2.0854	15.225	2.2429	15.2252	2.02155	15.225	1.9984	15.2253	1.8288	15.2253	1.7643
15.2335	0.88555	15.2337	1.48635	15.2337	2.11135	15.2333	2.29675	15.2335	2.06915	15.2333	2.0471	15.2337	1.83695	15.2337	1.77315
15.2418	0.88685	15.242	1.506	15.242	2.1406	15.2417	2.3541	15.2418	2.12115	15.2417	2.10045	15.242	1.84845	15.242	1.7848
15.2502	0.88785	15.2503	1.52945	15.2503	2.17715	15.25	2.41825	15.2502	2.18135	15.25	2.16205	15.2503	1.86425	15.2503	1.8021
15.2585	0.8897	15.2587	1.5601	15.2587	2.217	15.2583	2.4809	15.2585	2.2454	15.2583	2.22775	15.2587	1.88305	15.2587	1.82285
15.2668	0.89085	15.267	1.594	15.267	2.26385	15.2667	2.5494	15.2668	2.31415	15.2667	2.29815	15.267	1.907	15.267	1.8461
15.2752	0.8911	15.2753	1.6345	15.2753	2.3162	15.275	2.6185	15.2752	2.38945	15.275	2.37555	15.2753	1.9374	15.2753	1.8761
15.2835	0.8942	15.2837	1.6809	15.2837	2.3735	15.2833	2.69015	15.2835	2.4685	15.2833	2.45835	15.2837	1.9723	15.2837	1.90805
15.2918	0.89415	15.292	1.7301	15.292	2.43795	15.2917	2.75955	15.2918	2.54905	15.2917	2.54185	15.292	2.01175	15.292	1.94665
15.3002	0.89545	15.3003	1.7889	15.3003	2.50615	15.3	2.82775	15.3002	2.6316	15.3	2.6288	15.3003	2.0587	15.3003	1.991
15.3085	0.897	15.3087	1.85255	15.3087	2.5825	15.3083	2.8967	15.3085	2.71755	15.3083	2.7182	15.3087	2.114	15.3087	2.0406
15.3168	0.8988	15.317	1.9268	15.317	2.6561	15.3167	2.95735	15.3168	2.7984	15.3167	2.8039	15.317	2.1723	15.317	2.0941
15.3252	0.9008	15.3253	2.00375	15.3253	2.7355	15.325	3.0164	15.3252	2.87585	15.325	2.88915	15.3253	2.2389	15.3253	2.1543
15.3335	0.9071	15.3337	2.0872	15.3337	2.8188	15.3333	3.0699	15.3335	2.95045	15.3333	2.9732	15.3337	2.31035	15.3337	2.22
15.3418	0.9122	15.342	2.1752	15.342	2.90165	15.3417	3.1141	15.3418	3.01875	15.3417	3.05355	15.342	2.38735	15.342	2.2891
15.3502	0.9162	15.3503	2.2677	15.3503	2.9828	15.35	3.1536	15.3502	3.0766	15.35	3.1258	15.3503	2.4669	15.3503	2.36405
15.3585	0.92525	15.3587	2.36125	15.3587	3.06425	15.3583	3.1848	15.3585	3.12925	15.3583	3.19435	15.3587	2.54955	15.3587	2.44175
15.3668	0.93635	15.367	2.4584	15.367	3.1392	15.3667	3.20395	15.3668	3.16985	15.3667	3.25535	15.367	2.63655	15.367	2.52085
15.3752	0.95015	15.3753	2.5551	15.3753	3.21335	15.375	3.21515	15.3752	3.2007	15.375	3.3079	15.3753	2.7258	15.3753	2.60485
15.3835	0.965	15.3837	2.6517	15.3837	3.28085	15.3833	3.21615	15.3835	3.2168	15.3833	3.34965	15.3837	2.8151	15.3837	2.68115
15.3918	0.98335	15.392	2.74455	15.392	3.34375	15.3917	3.2071	15.3918	3.2225	15.3917	3.38575	15.392	2.904	15.392	2.7614
15.4002	1.00675	15.4003	2.83395	15.4003	3.39925	15.4	3.1897	15.4002	3.21485	15.4	3.41005	15.4003	2.98865	15.4003	2.89605
15.4085	1.03215	15.4087	2.9178	15.4087	3.44445	15.4083	3.1605	15.4085	3.1911	15.4083	3.41975	15.4087	3.06865	15.4087	2.9453
15.4168	1.06465	15.417	2.99855	15.417	3.4836	15.4167	3.12045	15.4168	3.1566	15.4167	3.4213	15.417	3.1422	15.417	2.99445
15.4252	1.10125	15.4253	3.06775	15.4253	3.5119	15.425	3.07115	15.4252	3.1099	15.425	3.4133	15.4253	3.20925	15.4253	3.06885
15.4335	1.1424	15.4337	3.133	15.4337	3.53115	15.4333	3.01615	15.4335	3.05375	15.4333	3.3917	15.4337	3.27165	15.4337	3.12935
15.4418	1.18875	15.442	3.188	15.442	3.53815	15.4417	2.95075	15.4418	2.98405	15.4417	3.35975	15.442	3.3237	15.442	3.18615
15.4502	1.23925	15.4503	3.23275	15.4503	3.53695	15.45	2.88095	15.4502	2.9099	15.45	3.31715	15.4503	3.3669	15.4503	3.2332
15.4585	1.2975	15.4587	3.26505	15.4587	3.5244	15.4583	2.8061	15.4585	2.82375	15.4583	3.2633	15.4587	3.3956	15.4587	3.2717
15.4668	1.35735	15.467	3.28795	15.467	3.5036	15.4667	2.7293	15.4668	2.73565	15.4667	3.2025	15.467	3.41705	15.467	3.3011
15.4752	1.42295	15.4753	3.2983	15.4753	3.47055	15.475	2.64885	15.4752	2.63925	15.475	3.1299	15.4753	3.4233	15.4753	3.3177
15.4835	1.49035	15.4837	3.29635	15.4837	3.4316	15.4833	2.56965	15.4835	2.54315	15.4833	3.052	15.4837	3.4188	15.4837	3.32675
15.4918	1.56225	15.492	3.28745	15.492	3.3804	15.4917	2.4877	15.4918	2.44545	15.4917	2.96615	15.492	3.4003	15.492	3.32455
15.5002	1.63655	15.5003	3.26435	15.5003	3.3233	15.5	2.40995	15.5002	2.34965	15.5	2.87685	15.5003	3.3717	15.5003	3.31385
15.5085	1.71295	15.5087	3.23005	15.5087	3.2568	15.5083	2.33345	15.5085	2.25365	15.5083	2.78015	15.5087	3.33115	15.5087	3.29055
15.5168	1.78745	15.517	3.18205	15.517	3.18455	15.5167	2.25905	15.5168	2.16245	15.5167	2.68315	15.517	3.28005	15.517	3.2558
15.5252	1.86325	15.5253	3.1242	15.5253	3.1082	15.525	2.1927	15.5252	2.0772	15.525	2.58735	15.5253	3.22135	15.5253	3.21635
15.5335	1.93785	15.5337	3.05755	15.5337	3.02555	15.5333	2.1273	15.5335	1.99435	15.5333	2.4884	15.5337	3.1486	15.5337	3.1643
15.5418	2.00635	15.542	2.9809	15.542	2.94065	15.5417	2.06745	15.5418	1.91885	15.5417	2.3927	15.542	3.0689	15.542	3.1025
15.5502	2.07235	15.5503	2.8983	15.5503	2.8507	15.55	2.0099	15.5502	1.8496	15.55	2.29935	15.5503	2.98395	15.5503	3.03415
15.5585	2.1319	15.5587	2.8941	15.5587	2.765	15.5583	1.9618	15.5585	1.7899	15.5583	2.21205	15.5587	2.89635	15.5587	2.96325
15.5668	2.1858	15.567	2.70725	15.567	2.67735	15.5667	1.9145	15.5668	1.7337	15.5667	2.1255	15.567	2.80405	15.567	2.8849
15.5752	2.23135	15.5753	2.60735	15.5753	2.5907	15.575	1.8733	15.5752	1.68145	15.575	2.0462	15.5753	2.70645	15.5753	2.8006
15.5835	2.26655	15.5837	2.50425	15.5837	2.5059	15.5833	1.83685	15.5835	1.636	15.5833	1.9709	15.5837	2.60955	15.5837	2.7133
15.5918	2.296	15.592	2.40075	15.592	2.4244	15.5917	1.80515	15.5918	1.59595	15.5917	1.90375	15.592	2.51425	15.592	2.624
15.6002	2.31585	15.6003	2.2997	15.6003	2.3468	15.6	1.7772	15.6002	1.55805	15.6	1.8397	15.6003	2.41945	15.6003	2.5333
15.6085	2.32705	15.6087	2.1965	15.6087	2.2755	15.6083	1.7531	15.6085	1.52895	15.6083	1.78575	15.6087	2.3282	15.6087	2.4431
15.6168	2.32825	15.617	2.0988	15.617	2.20485	15.6167	1.72885	15.6168	1.50065	15.6167	1.7313	15.617	2.24005	15.617	2.35595
15.6252	2.3191	15.6253	2.0075	15.6253	2.1413	15.625	1.7092	15.6252	1.4764	15.625	1.68695	15.6253	2.1564	15.6253	2.26885
15.6335	2.3015	15.6337	1.9197	15.6337	2.08115	15.6333	1.6917	15.6335	1.4552	15.6333	1.6447	15.6337	2.07725	15.6337	2.18715
15.6418	2.27285	15.642	1.8336	15.642	2.0282	15.6417	1.6772	15.6418	1.4381	15.6417	1.6087	15.642	2.0038	15.642	2.1074
15.6502	2.2366	15.6503	1.75425	15.6503	1.97875	15.65	1.6644	15.6502	1.42575	15.65	1.5767	15.6503	1.9356	15.6503	2.03425
15.6585	2.19205	15.6587	1.6806	15.6587	1.9349	15.6583	1.6528	15.6585	1.41435	15.6583	1.54755	15.6587	1.87125	15.6587	1.965
15.6668	2.1418	15.667	1.61505	15.667	1.89585	15.6667	1.6427	15.6668	1.3951	15.6667	1.52315	15.667	1.8139	15.667	1.90145
15.6752	2.08465	15.6753	1.5549	15.6753	1.8614	15.675	1.6331	15.6752	1.38625	15.675	1.50255	15.6753	1.76215	15.6753	1.8419
15.6835	2.02285	15.6837	1.49815	15.6837	1.83055	15.6833	1.6262	15.6835	1.376	15.6833	1.48305	15.6837	1.71595	15.6837	1.79055
15.6918	1.9583	15.692	1.45005	15.692	1.80385	15.6917	1.6208	15.6918	1.3681	15.6917	1.46735	15.692	1.6754	15.692	1.7423
15.7002	1.89135	15.7003	1.4041	15.7003	1.7781	15.7	1.61495	15.7002	1.36	15.7	1.4507	15.7003	1.6383	15.7003	1.6965
15.7085	1.82085	15.7087	1.3649	15.7087	1.75485	15.7083	1.60695	15.7085	1.3513	15.7083	1.4357	15.7087	1.60425	15.7087	1.6544
15.7168	1.7512	15.717	1.3306	15.717	1.7378	15.7167	1.6045	15.7168	1.34675	15.7167	1.426	15.717	1.5767	15.717	1.6219
15.7252	1.68505	15.7253	1.29985	15.7253	1.7181	15.725	1.5995	15.7252	1.3391	15.725	1.4153	15.7253	1.55045	15.7253	1.5889
15.7335	1.61555	15.7337	1.2702	15.7337	1.70295	15.7333	1.5942	15.7335	1.334	15.7333	1.404	15.7337	1.52745	15.7337	1.56055
15.7418	1.55265	15.742	1.2469	15.742	1.68965	15.7417	1.58955	15.7418	1.32885	15.7417	1.3951	15.742	1.5066	15.742	1.53535
15.7502	1.48945	15.7503	1.22555	15.7503	1.67935	15.75	1.58895	15.7502	1.32745	15.75	1.38955	15.7503	1.492	15.7503	1.5174
15.7585	1.43135	15.7587	1.20615	15.7587	1.66905	15.7583	1.5852	15.7585	1.3243	15.7583	1.38215	15.7587	1.4771	15.7587	1.49825
15.7668	1.37705	15.767	1.1907	15.767	1.6584	15.7667	1.5832	15.7668	1.3186	15.7667	1.3761	15.767	1.46305	15.767	1.47835
15.7752	1.3273	15.7753	1.17595	15.7753	1.64985	15.775	1.5829	15.7752	1.31515	15.775	1.37085	15.7753	1.4498	15.7753	1.46475
15.7835	1.2788	15.7837	1.16295	15.7837	1.6436	15.7833	1.58095	15.7835	1.31305	15.7833	1.366	15.7837	1.4407	15.7837	1.4508
15.7918	1.2386	15.792	1.15135	15.792	1.6359	15.7917	1.57875	15.7918	1.30905	15.7917	1.36155	15.792	1.42975	15.792	1.4363
15.8002	1.19935	15.8003	1.1409	15.8003	1.63085	15.8	1.57675	15.8002	1.3049	15.8	1.3584	15.8003	1.422	15.8003	1.4257
15.8085	1.1681	15.8087	1.13305	15.8087	1.6263	15.8083	1.5751	15.8085	1.30205	15.8083	1.357	15.8087	1.41585	15.8087	1.41645
15.8168	1.13825	15.817	1.12605	15.817	1.61895	15.8167	1.572	15.8168	1.29915	15.8167	1.35055	15.817	1.40885	15.817	1.4051
15.8252	1.11015	15.8253	1.1176	15.8253	1.6163	15.825	1.57095	15.8252	1.2957	15.825	1.3469	15.8253	1.4022	15.8253	1.39825
15.8335	1.08675	15.8337	1.1101	15.8337	1.6121	15.8333	1.56985	15.8335	1.29535	15.8333	1.34645	15.8337	1.3984	15.8337	1.3902
15.8418	1.06595	15.842	1.10445	15.842	1.60885	15.8417	1.5684	15.8418	1.29335	15.8417	1.3436	15.842	1.3908	15.842	1.3838
15.8502	1.04605	15.8503	1.0976	15.8503	1.6067	15.85	1.5685	15.8502	1.2922	15.85	1.3422	15.8503	1.38775	15.8503	1.3786
15.8585	1.0293	15.8587	1.09265	15.8587	1.6051	15.8583	1.5673	15.8585	1.29075	15.8583	1.3392	15.8587	1.38205	15.8587	1.3725
15.8668	1.0131	15.867	1.088	15.867	1.6025	15.8667	1.5661	15.8668	1.28925	15.8667	1.33985	15.867	1.37915	15.867	1.3684
15.8752	1.0023	15.8753	1.08455	15.8753	1.5995	15.875	1.56495	15.8752	1.28385	15.875	1.3367	15.8753	1.3752	15.8753	1.36355
15.8835	0.99	15.8837	1.08075	15.8837	1.59805	15.8833	1.56575	15.8835	1.2882	15.8833	1.3366	15.8837	1.37275	15.8837	1.36185
15.8918	0.9822	15.892	1.07865	15.892	1.59435	15.8917	1.56595	15.8918	1.28625	15.8917	1.3352	15.892	1.36775	15.892	1.3576
15.9002	0.97385	15.9003	1.0738	15.9003	1.59395	15.9	1.5669	15.9002	1.29425	15.9	1.3357	15.9003	1.3662	15.9003	1.3559
15.9085	0.9663	15.9087	1.0711	15.9087	1.5919	15.9083	1.56775	15.9085	1.28635	15.9083	1.3352	15.9087	1.36335	15.9087	1.35225
15.9168	0.95935	15.917	1.06715	15.917	1.5899	15.9167	1.56885	15.9168	1.2851	15.9167	1.3354	15.917	1.3616	15.917	1.3505
15.9252	0.95385	15.9253	1.0652	15.9253	1.5864	15.925	1.56975	15.9252	1.285	15.925	1.3348	15.9253	1.3593	15.9253	1.34905
15.9335	0.94975	15.9337	1.06355	15.9337	1.58815	15.9333	1.57065	15.9335	1.285	15.9333	1.3348	15.9337	1.3594	15.9337	1.3503
15.9418	0.94465	15.942	1.0609	15.942	1.5858	15.9417	1.5732	15.9418	1.2851	15.9417	1.3359	15.942	1.3575	15.942	1.34685
15.9502	0.94015	15.9503	1.05735	15.9503	1.58415	15.95	1.57425	15.9502	1.285	15.95	1.33515	15.9503	1.35515	15.9503	1.3458
15.9585	0.9382	15.9587	1.0582	15.9587	1.5817	15.9583	1.5755	15.9585	1.2854	15.9583	1.33625	15.9587	1.3542	15.9587	1.3463
15.9668	0.93495	15.967	1.05665	15.967	1.5812	15.9667	1.57805	15.9668	1.2844	15.9667	1.33895	15.967	1.35145	15.967	1.34545
15.9752	0.93205	15.9753	1.05455	15.9753	1.5782	15.975	1.58015	15.9752	1.2827	15.975	1.33905	15.9753	1.34905	15.9753	1.344
15.9835	0.92955	15.9837	1.0533	15.9837	1.57995	15.9833	1.5843	15.9835	1.283	15.9833	1.34355	15.9837	1.348	15.9837	1.3462
15.9918	0.9261	15.992	1.05	15.992	1.5792	15.9917	1.58485	15.9918	1.28135	15.9917	1.34605	15.992	1.3483	15.992	1.3463
16.0002	0.92515	16.0003	1.05075	16.0003	1.5763	16	1.58725	16.0002	1.2796	16	1.3485	16.0003	1.34645	16.0003	1.34815
16.0085	0.92415	16.0087	1.04955	16.0087	1.5761	16.0083	1.5904	16.0085	1.2807	16.0083	1.3501	16.0087	1.34535	16.0087	1.3501
16.0168	0.92245	16.017	1.04755	16.017	1.57485	16.0167	1.59205	16.0168	1.28165	16.0167	1.35345	16.017	1.3452	16.017	1.3521
16.0252	0.91975	16.0253	1.0447	16.0253	1.5734	16.025	1.5923	16.0252	1.27935	16.025	1.35605	16.0253	1.3422	16.0253	1.3548
16.0335	0.9173	16.0337	1.04395	16.0337	1.57295	16.0333	1.59405	16.0335	1.27795	16.0333	1.357	16.0337	1.34075	16.0337	1.35785
16.0418	0.9146	16.042	1.0413	16.042	1.5751	16.0417	1.59775	16.0418	1.27955	16.0417	1.3642	16.042	1.3422	16.042	1.36415
16.0502	0.9133	16.0503	1.03935	16.0503	1.57465	16.05	1.5977	16.0502	1.2806	16.05	1.3666	16.0503	1.34155	16.0503	1.3683
16.0585	0.9103	16.0587	1.0392	16.0587	1.57635	16.0583	1.60105	16.0585	1.2809	16.0583	1.37075	16.0587	1.3423	16.0587	1.3788
16.0668	0.91	16.067	1.03955	16.067	1.57405	16.0667	1.60065	16.0668	1.28005	16.0667	1.37205	16.067	1.33915	16.067	1.3838
16.0752	0.90845	16.0753	1.0388	16.0753	1.5745	16.075	1.60055	16.0752	1.2805	16.075	1.37385	16.0753	1.33925	16.0753	1.39145
16.0835	0.9069	16.0837	1.03785	16.0837	1.5728	16.0833	1.60145	16.0835	1.2795	16.0833	1.376	16.0837	1.3388	16.0837	1.39995
16.0918	0.9073	16.092	1.0373	16.092	1.5747	16.0917	1.6009	16.0918	1.27895	16.0917	1.3762	16.092	1.3372	16.092	1.40835
16.1002	0.9058	16.1003	1.0356	16.1003	1.57245	16.1	1.5989	16.1002	1.27905	16.1	1.3758	16.1003	1.3365	16.1003	1.4166
16.1085	0.9059	16.1087	1.03505	16.1087	1.57365	16.1083	1.598	16.1085	1.27755	16.1083	1.3763	16.1087	1.3364	16.1087	1.4243
16.1168	0.9065	16.117	1.0343	16.117	1.57335	16.1167	1.5975	16.1168	1.2786	16.1167	1.37685	16.117	1.336	16.117	1.43345
16.1252	0.9065	16.1253	1.03515	16.1253	1.57215	16.125	1.5958	16.1252	1.2781	16.125	1.3763	16.1253	1.3372	16.1253	1.4425
16.1335	0.9051	16.1337	1.0327	16.1337	1.5713	16.1333	1.5932	16.1335	1.2778	16.1333	1.3743	16.1337	1.33695	16.1337	1.4499
16.1418	0.90455	16.142	1.03425	16.142	1.57025	16.1417	1.59065	16.1418	1.2755	16.1417	1.37255	16.142	1.33465	16.142	1.4573
16.1502	0.90455	16.1503	1.03305	16.1503	1.56935	16.15	1.58755	16.1502	1.2731	16.15	1.36895	16.1503	1.33385	16.1503	1.4617
16.1585	0.9026	16.1587	1.0318	16.1587	1.57095	16.1583	1.58685	16.1585	1.273	16.1583	1.36665	16.1587	1.33415	16.1587	1.46815
16.1668	0.9032	16.167	1.03175	16.167	1.57145	16.1667	1.5851	16.1668	1.27215	16.1667	1.36545	16.167	1.3336	16.167	1.4712
16.1752	0.9028	16.1753	1.02925	16.1753	1.56745	16.175	1.57965	16.1752	1.26725	16.175	1.36025	16.1753	1.33275	16.1753	1.47115
16.1835	0.90235	16.1837	1.02885	16.1837	1.5667	16.1833	1.578	16.1835	1.26735	16.1833	1.3565	16.1837	1.33135	16.1837	1.47215
16.1918	0.9042	16.192	1.03025	16.192	1.56805	16.1917	1.57585	16.1918	1.2682	16.1917	1.3551	16.192	1.3341	16.192	1.4748
16.2002	0.90345	16.2003	1.0308	16.2003	1.565	16.2	1.57325	16.2002	1.26465	16.2	1.3505	16.2003	1.3319	16.2003	1.47145
16.2085	0.9032	16.2087	1.02925	16.2087	1.56415	16.2083	1.57065	16.2085	1.2624	16.2083	1.34695	16.2087	1.3313	16.2087	1.4691
16.2168	0.9033	16.217	1.0304	16.217	1.56265	16.2167	1.5704	16.2168	1.2634	16.2167	1.345	16.217	1.33045	16.217	1.4656
16.2252	0.90195	16.2253	1.0281	16.2253	1.5648	16.225	1.5702	16.2252	1.2644	16.225	1.34415	16.2253	1.33065	16.2253	1.4622
16.2335	0.89995	16.2337	1.0281	16.2337	1.56405	16.2333	1.56625	16.2335	1.26115	16.2333	1.3399	16.2337	1.3285	16.2337	1.45655
16.2418	0.8983	16.242	1.0264	16.242	1.56595	16.2417	1.5661	16.2418	1.2647	16.2417	1.33935	16.242	1.3297	16.242	1.4518
16.2502	0.89845	16.2503	1.027	16.2503	1.5653	16.25	1.566	16.2502	1.2646	16.25	1.3375	16.2503	1.3294	16.2503	1.4474
16.2585	0.90015	16.2587	1.0301	16.2587	1.5648	16.2583	1.5656	16.2585	1.26495	16.2583	1.336	16.2587	1.32935	16.2587	1.44065
16.2668	0.89805	16.267	1.0281	16.267	1.5654	16.2667	1.56595	16.2668	1.2649	16.2667	1.3344	16.267	1.32835	16.267	1.43415
16.2752	0.89585	16.2753	1.02985	16.2753	1.5648	16.275	1.56575	16.2752	1.26725	16.275	1.33275	16.2753	1.32945	16.2753	1.42755
16.2835	0.8969	16.2837	1.0271	16.2837	1.5633	16.2833	1.56625	16.2835	1.2671	16.2833	1.3308	16.2837	1.3276	16.2837	1.41995
16.2918	0.8944	16.292	1.02515	16.292	1.56335	16.2917	1.5666	16.2918	1.2677	16.2917	1.3296	16.292	1.32765	16.292	1.4123
16.3002	0.89545	16.3003	1.02445	16.3003	1.56265	16.3	1.5674	16.3002	1.26955	16.3	1.3274	16.3003	1.328	16.3003	1.4063
16.3085	0.8952	16.3087	1.0244	16.3087	1.5626	16.3083	1.56905	16.3085	1.2713	16.3083	1.32735	16.3087	1.32925	16.3087	1.40075
16.3168	0.8948	16.317	1.02485	16.317	1.56365	16.3167	1.56865	16.3168	1.27155	16.3167	1.32785	16.317	1.32855	16.317	1.39405
16.3252	0.8956	16.3253	1.02675	16.3253	1.56245	16.325	1.57145	16.3252	1.27365	16.325	1.32675	16.3253	1.33005	16.3253	1.3883
16.3335	0.89515	16.3337	1.02425	16.3337	1.56255	16.3333	1.57295	16.3335	1.27495	16.3333	1.32645	16.3337	1.32925	16.3337	1.38225
16.3418	0.89445	16.342	1.02535	16.342	1.5615	16.3417	1.5754	16.3418	1.27605	16.3417	1.3265	16.342	1.32865	16.342	1.37695
16.3502	0.8953	16.3503	1.0268	16.3503	1.5631	16.35	1.5784	16.3502	1.27765	16.35	1.32735	16.3503	1.32805	16.3503	1.37165
16.3585	0.89425	16.3587	1.02575	16.3587	1.56445	16.3583	1.5804	16.3585	1.2776	16.3583	1.32845	16.3587	1.3293	16.3587	1.36725
16.3668	0.89545	16.367	1.0254	16.367	1.56695	16.3667	1.58415	16.3668	1.2815	16.3667	1.33045	16.367	1.33005	16.367	1.3621
16.3752	0.89655	16.3753	1.02695	16.3753	1.5656	16.375	1.58695	16.3752	1.28135	16.375	1.3312	16.3753	1.32975	16.3753	1.3584
16.3835	0.8955	16.3837	1.02765	16.3837	1.5684	16.3833	1.5905	16.3835	1.28595	16.3833	1.335	16.3837	1.333	16.3837	1.35625
16.3918	0.8955	16.392	1.0291	16.392	1.5691	16.3917	1.59195	16.3918	1.2866	16.3917	1.3351	16.392	1.33275	16.392	1.35215
16.4002	0.8946	16.4003	1.02975	16.4003	1.5697	16.4	1.5942	16.4002	1.28935	16.4	1.33645	16.4003	1.334	16.4003	1.34885
16.4085	0.8955	16.4087	1.03115	16.4087	1.5742	16.4083	1.59735	16.4085	1.29085	16.4083	1.33975	16.4087	1.3349	16.4087	1.34755
16.4168	0.8948	16.417	1.03335	16.417	1.5751	16.4167	1.59645	16.4168	1.29095	16.4167	1.33985	16.417	1.3326	16.417	1.3441
16.4252	0.89485	16.4253	1.03285	16.4253	1.5803	16.425	1.60195	16.4252	1.29505	16.425	1.3443	16.4253	1.3363	16.4253	1.34605
16.4335	0.8942	16.4337	1.0348	16.4337	1.5841	16.4333	1.60485	16.4335	1.29725	16.4333	1.34865	16.4337	1.3385	16.4337	1.34735
16.4418	0.8946	16.442	1.0367	16.442	1.5856	16.4417	1.6061	16.4418	1.29765	16.4417	1.3489	16.442	1.3392	16.442	1.3449
16.4502	0.89375	16.4503	1.0398	16.4503	1.5877	16.45	1.60625	16.4502	1.2971	16.45	1.3517	16.4503	1.34015	16.4503	1.3443
16.4585	0.89555	16.4587	1.04225	16.4587	1.59245	16.4583	1.6086	16.4585	1.3003	16.4583	1.3541	16.4587	1.3441	16.4587	1.3473
16.4668	0.8951	16.467	1.04285	16.467	1.59565	16.4667	1.61155	16.4668	1.29995	16.4667	1.35595	16.467	1.3454	16.467	1.34565
16.4752	0.89365	16.4753	1.0463	16.4753	1.5989	16.475	1.61085	16.4752	1.30175	16.475	1.35975	16.4753	1.35065	16.4753	1.3487
16.4835	0.89575	16.4837	1.0491	16.4837	1.60145	16.4833	1.6101	16.4835	1.29955	16.4833	1.3592	16.4837	1.34905	16.4837	1.34795
16.4918	0.89405	16.492	1.0483	16.492	1.6038	16.4917	1.6098	16.4918	1.2993	16.4917	1.36075	16.492	1.3517	16.492	1.3513
16.5002	0.89645	16.5003	1.0512	16.5003	1.60655	16.5	1.6091	16.5002	1.29885	16.5	1.36205	16.5003	1.3566	16.5003	1.3561
16.5085	0.8975	16.5087	1.0532	16.5087	1.61035	16.5083	1.609	16.5085	1.29835	16.5083	1.3627	16.5087	1.36015	16.5087	1.3578
16.5168	0.89645	16.517	1.05515	16.517	1.61115	16.5167	1.60555	16.5168	1.2956	16.5167	1.3629	16.517	1.3616	16.517	1.35255
16.5252	0.89835	16.5253	1.0592	16.5253	1.6143	16.525	1.6048	16.5252	1.295	16.525	1.36255	16.5253	1.36325	16.5253	1.3496
16.5335	0.89805	16.5337	1.0603	16.5337	1.61525	16.5333	1.6041	16.5335	1.29175	16.5333	1.36105	16.5337	1.3639	16.5337	1.35485
16.5418	0.89955	16.542	1.063	16.542	1.61665	16.5417	1.6013	16.5418	1.2903	16.5417	1.36105	16.542	1.36665	16.542	1.3591
16.5502	0.9007	16.5503	1.0639	16.5503	1.61835	16.55	1.59845	16.5502	1.2868	16.55	1.3588	16.5503	1.36705	16.5503	1.43525
16.5585	0.9013	16.5587	1.06565	16.5587	1.6198	16.5583	1.5965	16.5585	1.28455	16.5583	1.3575	16.5587	1.3706	16.5587	1.43175
16.5668	0.90365	16.567	1.06785	16.567	1.61735	16.5667	1.5919	16.5668	1.28145	16.5667	1.35345	16.567	1.37095	16.567	1.3463
16.5752	0.90325	16.5753	1.0678	16.5753	1.6158	16.575	1.58955	16.5752	1.2772	16.575	1.3505	16.5753	1.3718	16.5753	1.3548
16.5835	0.90345	16.5837	1.066	16.5837	1.6151	16.5833	1.5885	16.5835	1.27635	16.5833	1.34895	16.5837	1.3722	16.5837	1.36245
16.5918	0.903	16.592	1.06685	16.592	1.61655	16.5917	1.58545	16.5918	1.27455	16.5917	1.3482	16.592	1.37415	16.592	1.3659
16.6002	0.9068	16.6003	1.0675	16.6003	1.61685	16.6	1.5829	16.6002	1.27265	16.6	1.3476	16.6003	1.37345	16.6003	1.3669
16.6085	0.90475	16.6087	1.0648	16.6087	1.6147	16.6083	1.581	16.6085	1.27125	16.6083	1.34655	16.6087	1.37265	16.6087	1.3666
16.6168	0.90655	16.617	1.06515	16.617	1.6123	16.6167	1.57885	16.6168	1.2708	16.6167	1.34435	16.617	1.3717	16.617	1.3663
16.6252	0.90755	16.6253	1.065	16.6253	1.60985	16.625	1.57535	16.6252	1.26875	16.625	1.34105	16.6253	1.37075	16.6253	1.36625
16.6335	0.90555	16.6337	1.06355	16.6337	1.60755	16.6333	1.573	16.6335	1.2659	16.6333	1.33715	16.6337	1.3704	16.6337	1.365
[truncated: 4,604 more rows]
