# Supplementary material for: A moonlighting function of a chitin polysaccharide monooxygenase, CWR-1, in Neurospora crassa allorecognition
Source: eLife. 2022 Aug 30;11:e80459. doi: 10.7554/eLife.80459 (PMC9550227; doi:10.7554/eLife.80459)
Supplement: Figure 5—figure supplement 1—source data 1. — Deconvoluted mass spectra of the purified polysaccharide monooxygenase (PMO) domains from each haplogroup and selected mutants. The whole-protein mass spectrometry is described in ‘Materials and methods’. [file elife-80459-fig5-figsupp1-data1.xlsx]

## Sheet: Sheet1
HG1 Y159A		HG1H20A H78A		HG1 H20A		HG6 H20A		HG6 H20A H79A
X(Daltons)	Y(Counts)	X(Daltons)	Y(Counts)	X(Daltons)	Y(Counts)	X(Daltons)	Y(Counts)	X(Daltons)	Y(Counts)
10000	0.462141	10000	9.07245e-07	10000	0.000987754	10000	0.00118028	10000	1.05498e-05
10001	0.146543	10001	6.97407e-07	10001	0.000534649	10001	0.000144036	10001	3.68892e-05
10002	0.0309589	10002	2.97947e-07	10002	0.000176186	10002	1.41801e-05	10002	6.96295e-05
10003	0.005104	10003	7.64177e-08	10003	3.8542e-05	10003	1.54745e-06	10003	7.22026e-05
10004	0.000720096	10004	1.34729e-08	10004	5.93707e-06	10004	2.21561e-07	10004	4.16989e-05
10005	9.69425e-05	10005	2.1296e-09	10005	7.19353e-07	10005	4.83059e-08	10005	1.44128e-05
10006	1.42051e-05	10006	4.64057e-10	10006	8.43179e-08	10006	1.82878e-08	10006	3.60891e-06
10007	2.58782e-06	10007	2.38266e-10	10007	1.31203e-08	10007	1.32471e-08	10007	9.12501e-07
10008	6.50081e-07	10008	4.63182e-10	10008	4.02467e-09	10008	1.90514e-08	10008	3.60455e-07
10009	2.36045e-07	10009	4.13648e-09	10009	3.56223e-09	10009	5.16092e-08	10009	3.40714e-07
10010	1.20732e-07	10010	1.36103e-07	10010	1.13185e-08	10010	2.23547e-07	10010	9.85477e-07
10011	7.84587e-08	10011	9.23521e-06	10011	1.19103e-07	10011	1.17997e-06	10011	8.09017e-06
10012	5.45347e-08	10012	0.000612911	10012	2.7585e-06	10012	5.40187e-06	10012	0.000125365
10013	3.26834e-08	10013	0.0195152	10013	7.5283e-05	10013	1.52697e-05	10013	0.00199241
10014	1.36712e-08	10014	0.17134	10014	0.00125443	10014	2.04785e-05	10014	0.0173412
10015	3.47148e-09	10015	0.295879	10015	0.00751761	10015	1.14901e-05	10015	0.0502329
10016	5.40066e-10	10016	0.0918035	10016	0.0119654	10016	2.82477e-06	10016	0.0364069
10017	6.42429e-11	10017	0.00621004	10017	0.00489892	10017	3.79525e-07	10017	0.00640744
10018	9.12826e-12	10018	0.000153999	10018	0.000663238	10018	4.0125e-08	10018	0.000352885
10019	2.77245e-12	10019	3.27833e-06	10019	4.94734e-05	10019	5.18885e-09	10019	1.05234e-05
10020	2.99309e-12	10020	1.72034e-07	10020	4.02384e-06	10020	1.24535e-09	10020	3.75325e-07
10021	1.38173e-11	10021	5.60769e-08	10021	7.02878e-07	10021	7.30495e-10	10021	3.75872e-08
10022	2.10074e-10	10022	1.64764e-07	10022	4.11011e-07	10022	1.08935e-09	10022	1.91478e-08
10023	5.77621e-09	10023	3.07227e-06	10023	8.47056e-07	10023	3.32379e-09	10023	5.20712e-08
10024	1.4433e-07	10024	0.000158805	10024	4.48371e-06	10024	1.38853e-08	10024	4.53855e-07
10025	1.87864e-06	10025	0.00936056	10025	3.65914e-05	10025	5.03628e-08	10025	5.7273e-06
10026	9.25726e-06	10026	0.321363	10026	0.000273904	10026	1.08493e-07	10026	4.92102e-05
10027	1.60224e-05	10027	4.36964	10027	0.00123301	10027	1.11579e-07	10027	0.000170077
10028	1.10247e-05	10028	20.3546	10028	0.00249529	10028	5.32823e-08	10028	0.0001834
10029	3.90306e-06	10029	33.2229	10029	0.00194775	10029	1.36394e-08	10029	6.13302e-05
10030	9.84025e-07	10030	21.6361	10030	0.000583648	10030	2.43214e-09	10030	7.81487e-06
10031	2.46043e-07	10031	6.85792	10031	7.89971e-05	10031	4.11093e-10	10031	5.58312e-07
10032	8.10898e-08	10032	1.35234	10032	6.78124e-06	10032	8.69833e-11	10032	3.7667e-08
10033	4.27185e-08	10033	0.218766	10033	5.99547e-07	10033	2.76956e-11	10033	4.23217e-09
10034	3.85767e-08	10034	0.0387989	10034	9.29691e-08	10034	1.40041e-11	10034	1.26815e-09
10035	5.64089e-08	10035	0.00997262	10035	3.86923e-08	10035	1.04798e-11	10035	1.27113e-09
10036	1.14829e-07	10036	0.00469822	10036	5.14982e-08	10036	1.00493e-11	10036	3.92162e-09
10037	2.7038e-07	10037	0.0046962	10037	1.93959e-07	10037	1.07488e-11	10037	2.66814e-08
10038	6.27943e-07	10038	0.0100432	10038	1.45951e-06	10038	1.20723e-11	10038	2.55469e-07
10039	1.30238e-06	10039	0.0390712	10039	1.41332e-05	10039	1.49582e-11	10039	2.21169e-06
10040	2.31669e-06	10040	0.201022	10040	0.000117084	10040	2.32827e-11	10040	1.2013e-05
10041	3.50626e-06	10041	0.911753	10041	0.000617117	10041	5.18552e-11	10041	3.15983e-05
10042	4.478e-06	10042	2.46356	10042	0.0017926	10042	1.72392e-10	10042	3.50506e-05
10043	4.68525e-06	10043	2.98271	10043	0.00292265	10043	7.83146e-10	10043	1.62845e-05
10044	3.81731e-06	10044	1.44303	10044	0.0031371	10044	4.0135e-09	10044	3.60936e-06
10045	2.30039e-06	10045	0.304031	10045	0.00283844	10045	1.85839e-08	10045	4.94764e-07
10046	1.00417e-06	10046	0.0371856	10046	0.00279368	10046	6.49422e-08	10046	6.01633e-08
10047	3.30418e-07	10047	0.00416068	10047	0.00359262	10047	1.5551e-07	10047	9.77467e-09
10048	9.22315e-08	10048	0.000729294	10048	0.00645772	10048	2.53665e-07	10048	3.12045e-09
10049	2.6488e-08	10049	0.000323733	10049	0.0155725	10049	3.01937e-07	10049	2.59078e-09
10050	9.91457e-09	10050	0.00047232	10050	0.0452002	10050	2.94087e-07	10050	6.2047e-09
10051	6.02809e-09	10051	0.00213032	10051	0.138049	10051	2.65206e-07	10051	3.83799e-08
10052	6.77296e-09	10052	0.0207571	10052	0.385832	10052	2.43346e-07	10052	4.51039e-07
10053	1.37738e-08	10053	0.259973	10053	0.856205	10053	2.3606e-07	10053	6.54954e-06
10054	4.23971e-08	10054	2.49935	10054	1.30802	10054	2.37252e-07	10054	7.49407e-05
10055	1.48228e-07	10055	12.45	10055	1.20944	10055	2.3398e-07	10055	0.000464882
10056	4.30251e-07	10056	25.8288	10056	0.621137	10056	2.14867e-07	10056	0.00123388
10057	7.97383e-07	10057	21.3627	10057	0.175724	10057	1.79365e-07	10057	0.00129529
10058	8.03843e-07	10058	7.80657	10058	0.0302135	10058	1.37395e-07	10058	0.000576185
10059	4.26875e-07	10059	1.55834	10059	0.00392221	10059	9.97799e-08	10059	0.000131176
10060	1.32529e-07	10060	0.226683	10060	0.00052823	10060	7.19237e-08	10060	2.01774e-05
10061	3.03718e-08	10061	0.0336207	10061	0.000105358	10061	5.45687e-08	10061	2.9459e-06
10062	7.15157e-09	10062	0.00719985	10062	4.14437e-05	10062	4.69499e-08	10062	5.93251e-07
10063	2.48052e-09	10063	0.00300233	10063	3.55718e-05	10063	4.96924e-08	10063	2.3595e-07
10064	1.68997e-09	10064	0.00287625	10064	5.79539e-05	10064	6.86809e-08	10064	2.407e-07
10065	2.53526e-09	10065	0.00608535	10065	0.000128735	10065	1.24315e-07	10065	6.73647e-07
10066	7.53317e-09	10066	0.0221493	10066	0.000261624	10066	2.74923e-07	10066	4.3225e-06
10067	3.31948e-08	10067	0.0942795	10067	0.000345164	10067	6.58436e-07	10067	4.3118e-05
10068	1.48749e-07	10068	0.311737	10068	0.000238569	10068	1.50996e-06	10068	0.000412102
10069	4.71922e-07	10069	0.573232	10069	8.06136e-05	10069	3.0709e-06	10069	0.00240322
10070	8.07919e-07	10070	0.479413	10070	1.41285e-05	10070	5.49908e-06	10070	0.00617869
10071	6.49351e-07	10071	0.174656	10071	1.50928e-06	10071	9.10565e-06	10071	0.00602534
10072	2.47463e-07	10072	0.0312905	10072	1.25103e-07	10072	1.48538e-05	10072	0.00231701
10073	5.22847e-08	10073	0.00364374	10073	1.08675e-08	10073	2.45945e-05	10073	0.000437606
10074	8.08849e-09	10074	0.000413992	10074	1.37166e-09	10074	4.008e-05	10074	5.85181e-05
10075	1.29641e-09	10075	7.26525e-05	10075	3.38249e-10	10075	5.91328e-05	10075	8.61631e-06
10076	3.01485e-10	10076	2.90484e-05	10076	1.97582e-10	10076	7.14141e-05	10076	2.10742e-06
10077	1.29308e-10	10077	3.1692e-05	10077	2.81911e-10	10077	6.53506e-05	10077	1.11881e-06
10078	1.11188e-10	10078	8.50197e-05	10078	8.53876e-10	10078	4.41165e-05	10078	1.36289e-06
10079	1.77118e-10	10079	0.000395087	10079	4.21639e-09	10079	2.26792e-05	10079	3.29769e-06
10080	4.29217e-10	10080	0.00199043	10080	2.48473e-08	10080	9.66569e-06	10080	1.21329e-05
10081	1.2319e-09	10081	0.00695134	10081	1.30246e-07	10081	3.87178e-06	10081	5.03083e-05
10082	3.26474e-09	10082	0.0120413	10082	4.77746e-07	10082	1.68671e-06	10082	0.000179621
10083	6.46053e-09	10083	0.00854833	10083	1.02988e-06	10083	9.16799e-07	10083	0.00044624
10084	8.21975e-09	10084	0.00236147	10084	1.17717e-06	10084	6.84966e-07	10084	0.000662006
10085	6.36185e-09	10085	0.000273868	10085	7.0336e-07	10085	7.30437e-07	10085	0.000536995
10086	3.22924e-09	10086	1.63428e-05	10086	2.43284e-07	10086	1.09633e-06	10086	0.000236901
10087	1.34411e-09	10087	7.02435e-07	10087	6.15921e-08	10087	2.22741e-06	10087	6.31297e-05
10088	6.40702e-10	10088	3.4062e-08	10088	1.60002e-08	10088	5.86481e-06	10088	1.28107e-05
10089	4.87435e-10	10089	2.99918e-09	10089	6.02187e-09	10089	1.89547e-05	10089	2.7627e-06
10090	7.07461e-10	10090	6.81851e-10	10090	4.07803e-09	10090	6.85492e-05	10090	8.96971e-07
10091	1.82388e-09	10091	4.36341e-10	10091	4.94262e-09	10091	0.000238633	10091	5.54327e-07
10092	6.27226e-09	10092	6.40909e-10	10092	8.72085e-09	10092	0.000659474	10092	6.65297e-07
10093	2.01528e-08	10093	1.48883e-09	10093	1.68887e-08	10093	0.00120657	10093	1.27888e-06
10094	4.63656e-08	10094	3.82139e-09	10094	2.90093e-08	10094	0.00131675	10094	2.92448e-06
10095	7.0206e-08	10095	8.72572e-09	10095	4.16458e-08	10095	0.000873432	10095	6.12246e-06
10096	7.69935e-08	10096	1.68233e-08	10096	5.46428e-08	10096	0.00040728	10096	1.02448e-05
10097	7.4617e-08	10097	2.87802e-08	10097	7.71941e-08	10097	0.000167758	10097	1.37236e-05
10098	7.73324e-08	10098	4.62881e-08	10098	1.35068e-07	10098	7.72461e-05	10098	1.60847e-05
10099	9.39898e-08	10099	6.98531e-08	10099	3.06785e-07	10099	4.70272e-05	10099	1.82914e-05
10100	1.30462e-07	10100	9.2186e-08	10100	8.58296e-07	10100	4.03383e-05	10100	2.14239e-05
10101	1.89232e-07	10101	9.6938e-08	10101	2.67052e-06	10101	4.75566e-05	10101	2.57032e-05
10102	2.69459e-07	10102	7.71069e-08	10102	8.47877e-06	10102	7.20809e-05	10102	2.98662e-05
10103	3.85641e-07	10103	4.77692e-08	10103	2.6646e-05	10103	0.000130956	10103	3.12207e-05
10104	6.14821e-07	10104	2.55973e-08	10104	8.45404e-05	10104	0.000267192	10104	2.76522e-05
10105	1.22552e-06	10105	1.35896e-08	10105	0.000278665	10105	0.000566951	10105	2.02499e-05
10106	3.19642e-06	10106	8.01224e-09	10106	0.000944305	10106	0.00112627	10106	1.25709e-05
10107	1.0212e-05	10107	5.62308e-09	10107	0.00305688	10107	0.00184208	10107	7.19629e-06
10108	3.43641e-05	10108	4.92413e-09	10108	0.00838017	10108	0.00219568	10108	4.3928e-06
10109	0.000103319	10109	5.77558e-09	10109	0.0172012	10109	0.00176967	10109	3.45413e-06
10110	0.000248297	10110	1.0218e-08	10110	0.0244125	10110	0.000967955	10110	4.21639e-06
10111	0.000462278	10111	3.1225e-08	10111	0.0236671	10111	0.000393729	10111	8.99293e-06
10112	0.000689288	10112	1.77533e-07	10112	0.0164681	10112	0.00014038	10112	3.33687e-05
10113	0.000874589	10113	1.76671e-06	10113	0.00895384	10113	5.3785e-05	10113	0.000188136
10114	0.000998027	10114	2.48439e-05	10114	0.00417178	10114	2.70234e-05	10114	0.00128783
10115	0.00106103	10115	0.000359294	10115	0.00180965	10115	2.06231e-05	10115	0.00833119
10116	0.00106605	10116	0.00379859	10116	0.000781828	10116	2.51697e-05	10116	0.040534
10117	0.00100554	10117	0.0218484	10117	0.00035163	10117	4.57743e-05	10117	0.123169
10118	0.000861107	10118	0.0555796	10118	0.000165394	10118	0.000102803	10118	0.203431
10119	0.000627749	10119	0.0568195	10119	7.74139e-05	10119	0.000219956	10119	0.167842
10120	0.000358568	10120	0.0240628	10120	3.27965e-05	10120	0.00034825	10120	0.06863
10121	0.000150193	10121	0.00498468	10121	1.14409e-05	10121	0.000348343	10121	0.0153676
10122	4.6041e-05	10122	0.000679405	10122	3.19477e-06	10122	0.000221193	10122	0.00236846
10123	1.14001e-05	10123	8.98842e-05	10123	7.8117e-07	10123	0.000108061	10123	0.000353803
10124	2.79016e-06	10124	1.72511e-05	10124	2.06019e-07	10124	5.72107e-05	10124	7.54377e-05
10125	8.79035e-07	10125	6.56629e-06	10125	7.60878e-08	10125	4.84997e-05	10125	3.16792e-05
10126	4.59527e-07	10126	5.73781e-06	10126	4.81761e-08	10126	8.8621e-05	10126	3.06889e-05
10127	4.724e-07	10127	1.11596e-05	10127	5.46986e-08	10127	0.000381151	10127	6.61446e-05
10128	9.9268e-07	10128	4.11036e-05	10128	9.68213e-08	10128	0.00332046	10128	0.000263807
10129	3.83938e-06	10129	0.000226443	10129	2.03703e-07	10129	0.042404	10129	0.00150642
10130	2.16316e-05	10130	0.00141119	10130	3.73517e-07	10130	0.538487	10130	0.00936579
10131	0.000127899	10131	0.00730329	10131	4.56765e-07	10131	4.75737	10131	0.0484699
10132	0.00054916	10132	0.0228925	10132	3.12982e-07	10132	22.3853	10132	0.162293
10133	0.00121842	10133	0.0329956	10133	1.13938e-07	10133	48.2577	10133	0.284032
10134	0.00109829	10134	0.0183717	10134	2.39811e-08	10134	46.2915	10134	0.226488
10135	0.000372825	10135	0.00389456	10135	3.67479e-09	10135	21.4594	10135	0.0807251
10136	5.46491e-05	10136	0.000378719	10136	5.89022e-10	10136	5.71704	10136	0.0146489
10137	4.98983e-06	10137	2.51658e-05	10137	1.52888e-10	10137	1.10573	10137	0.00180104
10138	4.93717e-07	10138	2.0247e-06	10138	9.62511e-11	10138	0.200848	10138	0.00022586
10139	9.74052e-08	10139	3.70948e-07	10139	1.87459e-10	10139	0.0436773	10139	4.54527e-05
10140	6.06228e-08	10140	2.55907e-07	10140	1.13149e-09	10140	0.0137761	10140	2.1445e-05
10141	1.34224e-07	10141	7.94429e-07	10141	1.68834e-08	10141	0.00703483	10141	2.8587e-05
10142	8.12789e-07	10142	8.77871e-06	10142	4.31333e-07	10142	0.00585414	10142	0.000100449
10143	7.97081e-06	10143	0.000196238	10143	1.24805e-05	10143	0.00716596	10143	0.000687144
10144	6.96721e-05	10144	0.00439531	10144	0.000275524	10144	0.0106418	10144	0.00584985
10145	0.000321065	10145	0.0515865	10145	0.00330008	10145	0.0150979	10145	0.0382239
10146	0.000532281	10146	0.198371	10146	0.0165028	10146	0.0163261	10146	0.12477
10147	0.000255423	10147	0.197918	10147	0.0293895	10147	0.0115259	10147	0.148243
10148	3.38612e-05	10148	0.05238	10148	0.0180439	10148	0.00509507	10148	0.0542003
10149	1.42018e-06	10149	0.00484892	10149	0.00428524	10149	0.00154077	10149	0.00613974
10150	2.64311e-08	10150	0.000259908	10150	0.000518682	10150	0.000391989	10150	0.000264766
10151	3.79195e-10	10151	1.54621e-05	10151	4.89915e-05	10151	0.000111115	10151	6.61806e-06
10152	8.5917e-12	10152	1.93316e-06	10152	6.03223e-06	10152	4.64425e-05	10152	1.7627e-07
10153	6.25479e-13	10153	7.71254e-07	10153	1.53702e-06	10153	3.45765e-05	10153	9.87334e-09
10154	2.2305e-13	10154	1.02631e-06	10154	1.02067e-06	10154	4.70506e-05	10154	1.97169e-09
10155	3.57211e-13	10155	3.31826e-06	10155	1.57026e-06	10155	0.000100468	10155	1.6222e-09
10156	1.47768e-12	10156	1.57052e-05	10156	3.66724e-06	10156	0.000255801	10156	4.05713e-09
10157	7.58028e-12	10157	6.71301e-05	10157	7.5231e-06	10157	0.000579017	10157	1.71526e-08
10158	2.64135e-11	10158	0.000190106	10158	8.45451e-06	10158	0.000946122	10158	6.74001e-08
10159	4.66463e-11	10159	0.00032952	10159	3.95987e-06	10159	0.00105476	10159	1.65683e-07
10160	4.34768e-11	10160	0.00039927	10160	7.4051e-07	10160	0.000891756	10160	2.30691e-07
10161	2.8501e-11	10161	0.000442113	10161	6.44504e-08	10161	0.00071488	10161	2.1919e-07
10162	1.91212e-11	10162	0.000594551	10162	3.45222e-09	10162	0.000704194	10162	2.06632e-07
10163	1.7418e-11	10163	0.00115861	10163	1.57261e-10	10163	0.00105016	10163	2.8598e-07
10164	2.30525e-11	10164	0.00325604	10164	8.18432e-12	10164	0.00262243	10164	7.23215e-07
10165	3.8232e-11	10165	0.0111095	10165	6.06428e-13	10165	0.0107394	10165	3.13586e-06
10166	6.14981e-11	10166	0.035664	10166	7.27173e-14	10166	0.0637142	10166	1.71998e-05
10167	7.62574e-11	10167	0.0848584	10167	1.4735e-14	10167	0.450107	10167	8.05987e-05
10168	6.50852e-11	10168	0.12815	10168	4.95403e-15	10168	2.99717	10168	0.000232406
10169	3.92867e-11	10169	0.11673	10169	2.63208e-15	10169	14.9198	10169	0.000342801
10170	1.9319e-11	10170	0.0666259	10170	2.09981e-15	10170	46.0878	10170	0.000248673
10171	9.48157e-12	10171	0.0261838	10171	2.40947e-15	10171	79.6733	10171	9.47304e-05
10172	5.70558e-12	10172	0.00796771	10172	3.7829e-15	10172	76.9643	10172	2.15058e-05
10173	4.94279e-12	10173	0.00212123	10173	7.46212e-15	10173	45.6787	10173	3.43845e-06
10174	6.75477e-12	10174	0.000562736	10174	1.61848e-14	10174	19.6565	10174	4.8123e-07
10175	1.4914e-11	10175	0.000173624	10175	3.29365e-14	10175	7.49239	10175	7.86418e-08
10176	5.15599e-11	10176	7.47942e-05	10176	5.49412e-14	10176	3.08039	10176	2.1268e-08
10177	2.56599e-10	10177	5.34914e-05	10177	7.00765e-14	10177	1.59963	10177	1.32835e-08
10178	1.58349e-09	10178	6.89416e-05	10178	6.86374e-14	10178	1.14511	10178	2.29977e-08
10179	9.70383e-09	10179	0.000146364	10179	5.43897e-14	10179	1.12869	10179	1.00953e-07
10180	4.50332e-08	10180	0.000389474	10180	3.72319e-14	10180	1.41104	10180	7.77534e-07
10181	1.22216e-07	10181	0.000896051	10181	2.35355e-14	10181	1.97357	10181	6.26689e-06
10182	1.63854e-07	10182	0.00127873	10182	1.49935e-14	10182	2.74938	10182	3.26842e-05
10183	1.06758e-07	10183	0.00095024	10183	1.10519e-14	10183	3.57274	10183	8.12539e-05
10184	3.98014e-08	10184	0.000382348	10184	1.14221e-14	10184	4.31343	10184	8.96384e-05
10185	1.17556e-08	10185	0.000106227	10185	2.01643e-14	10185	5.02009	10185	5.13991e-05
10186	4.17634e-09	10186	2.97071e-05	10186	6.80478e-14	10186	5.86293	10186	2.14965e-05
10187	2.63769e-09	10187	1.23622e-05	10187	4.14866e-13	10187	6.94218	10187	1.00448e-05
10188	3.71867e-09	10188	1.00018e-05	10188	3.57316e-12	10188	8.0709	10188	7.6698e-06
10189	1.14681e-08	10189	1.65861e-05	10189	2.99859e-11	10189	8.66402	10189	1.17065e-05
10190	6.06168e-08	10190	4.85345e-05	10190	1.67326e-10	10190	8.08898	10190	3.46364e-05
10191	3.87273e-07	10191	0.000195238	10191	4.67877e-10	10191	6.40483	10191	0.000162521
10192	2.16952e-06	10192	0.000854219	10192	5.82843e-10	10192	4.42092	10192	0.000945044
10193	8.5915e-06	10193	0.00346107	10193	3.43073e-10	10193	2.85683	10193	0.00558767
10194	2.1639e-05	10194	0.011749	10194	1.16164e-10	10194	1.87173	10194	0.0294741
10195	3.34188e-05	10195	0.0306317	10195	2.94234e-11	10195	1.29789	10195	0.125206
10196	3.13432e-05	10196	0.0551475	10196	7.18468e-12	10196	0.93255	10196	0.381068
10197	1.79389e-05	10197	0.061184	10197	2.0694e-12	10197	0.644721	10197	0.724874
10198	6.52629e-06	10198	0.038949	10198	8.2055e-13	10198	0.39543	10198	0.766341
10199	1.68487e-06	10199	0.0145934	10199	5.12381e-13	10199	0.207574	10199	0.432057
10200	3.73851e-07	10200	0.00372097	10200	5.66299e-13	10200	0.0966616	10200	0.140063
10201	9.06382e-08	10201	0.000816745	10201	1.16697e-12	10201	0.043782	10201	0.0316371
10202	2.96949e-08	10202	0.000197649	10202	4.14234e-12	10202	0.0213376	10202	0.0064733
10203	1.45832e-08	10203	6.24976e-05	10203	2.00775e-11	10203	0.0119164	10203	0.00154783
10204	1.03609e-08	10204	2.70177e-05	10204	9.57424e-11	10204	0.00770896	10204	0.000515034
10205	9.38116e-09	10205	1.5179e-05	10205	3.28565e-10	10205	0.00568059	10205	0.000255411
10206	9.57035e-09	10206	1.0353e-05	10206	6.69471e-10	10206	0.00472806	10206	0.000187165
10207	1.05358e-08	10207	8.37077e-06	10207	7.97852e-10	10207	0.00449786	10207	0.000195402
10208	1.31261e-08	10208	8.14746e-06	10208	6.49682e-10	10208	0.00492309	10208	0.000278427
10209	2.00724e-08	10209	9.43054e-06	10209	4.68762e-10	10209	0.00595825	10209	0.000502978
10210	3.88432e-08	10210	1.15947e-05	10210	3.89698e-10	10210	0.00718887	10210	0.000993392
10211	8.84353e-08	10211	1.20603e-05	10211	4.42624e-10	10211	0.00752984	10211	0.00169604
10212	2.01505e-07	10212	8.07231e-06	10212	7.11174e-10	10212	0.00613493	10212	0.00190628
10213	3.835e-07	10213	2.84191e-06	10213	1.49429e-09	10213	0.00381394	10213	0.00113975
10214	5.41464e-07	10214	5.17554e-07	10214	3.60613e-09	10214	0.0019986	10214	0.000344599
10215	5.66303e-07	10215	6.16909e-08	10215	8.88172e-09	10215	0.00107704	10215	6.3116e-05
10216	4.98598e-07	10216	7.77349e-09	10216	2.08952e-08	10216	0.000757288	10216	1.05861e-05
10217	4.62948e-07	10217	1.91144e-09	10217	4.68547e-08	10217	0.000849084	10217	2.82066e-06
10218	5.82467e-07	10218	1.56019e-09	10218	1.0503e-07	10218	0.00167818	10218	1.96194e-06
10219	1.19015e-06	10219	5.22151e-09	10219	2.50526e-07	10219	0.00567338	10219	4.47238e-06
10220	4.0752e-06	10220	5.76827e-08	10220	6.57754e-07	10220	0.0280945	10220	2.88792e-05
10221	2.02995e-05	10221	1.2231e-06	10221	1.84525e-06	10221	0.159218	10221	0.000340021
10222	0.000112475	10222	2.61677e-05	10222	4.99219e-06	10222	0.775727	10222	0.00422436
10223	0.000509511	10223	0.000326946	10223	1.12084e-05	10223	2.49962	10223	0.0341061
10224	0.00145506	10224	0.00168279	10224	1.80413e-05	10224	4.46916	10224	0.12788
10225	0.0022443	10225	0.00313361	10225	1.90269e-05	10225	4.26147	10225	0.188129
10226	0.00180997	10226	0.00225463	10226	1.30519e-05	10226	2.43846	10226	0.107064
10227	0.000819365	10227	0.00077654	10227	6.21469e-06	10227	1.08047	10227	0.0265569
10228	0.000238231	10228	0.00017313	10228	2.2741e-06	10228	0.510998	10228	0.0036203
10229	5.21336e-05	10229	3.45794e-05	10229	7.09406e-07	10229	0.341086	10229	0.000374333
10230	1.00794e-05	10230	8.31712e-06	10230	2.06903e-07	10230	0.368926	10230	4.30302e-05
10231	2.02154e-06	10231	3.05565e-06	10231	6.1667e-08	10231	0.619548	10231	8.14494e-06
10232	4.9662e-07	10232	2.03012e-06	10232	2.06805e-08	10232	1.34214	10232	3.51389e-06
10233	1.75941e-07	10233	2.66552e-06	10233	8.61038e-09	10233	2.94254	10233	4.06894e-06
10234	1.02263e-07	10234	6.83925e-06	10234	4.79668e-09	10234	5.2517	10234	1.18843e-05
10235	1.02605e-07	10235	3.02401e-05	10235	3.62779e-09	10235	6.60706	10235	6.65975e-05
10236	1.67635e-07	10236	0.000183582	10236	3.454e-09	10236	5.53254	10236	0.000484304
10237	3.79705e-07	10237	0.00115206	10237	3.4937e-09	10237	3.14053	10237	0.00311141
10238	9.65168e-07	10238	0.00564103	10238	2.9761e-09	10238	1.29991	10238	0.0133744
10239	2.29004e-06	10239	0.0172085	10239	1.69136e-09	10239	0.436174	10239	0.0341659
10240	4.63879e-06	10240	0.0287316	10240	5.47627e-10	10240	0.134139	10240	0.0543774
10241	8.26798e-06	10241	0.0259745	10241	9.9659e-11	10241	0.0430959	10241	0.0644963
10242	1.45394e-05	10242	0.0142124	10242	1.20931e-11	10242	0.0165448	10242	0.0726532
10243	2.82738e-05	10243	0.00579462	10243	1.37267e-12	10243	0.0086369	10243	0.0966077
10244	6.2119e-05	10244	0.00224914	10244	2.19559e-13	10244	0.00680444	10244	0.17027
10245	0.000137649	10245	0.00101683	10245	6.81931e-14	10245	0.00850393	10245	0.392179
10246	0.000249365	10246	0.000588038	10246	4.49236e-14	10246	0.0163585	10246	1.05327
10247	0.0002995	10247	0.000424409	10247	5.30191e-14	10247	0.0431344	10247	2.83605
10248	0.000213984	10248	0.000348823	10248	8.21167e-14	10248	0.130131	10248	6.70393
10249	9.57467e-05	10249	0.000301097	10249	1.25627e-13	10249	0.365838	10249	12.7139
10250	3.3011e-05	10250	0.000268457	10250	1.65566e-13	10250	0.79617	10250	18.3915
10251	1.18108e-05	10251	0.000259243	10251	1.94503e-13	10251	1.17754	10251	19.7945
10252	5.82004e-06	10252	0.000288375	10252	2.35378e-13	10252	1.12148	10252	15.7181
10253	4.67693e-06	10253	0.000373338	10253	3.42318e-13	10253	0.708898	10253	9.29026
10254	6.19765e-06	10254	0.000520173	10254	6.45895e-13	10254	0.332504	10254	4.22614
10255	1.20598e-05	10255	0.000671777	10255	1.53182e-12	10255	0.138477	10255	1.57908
10256	2.91127e-05	10256	0.000688219	10256	4.10042e-12	10256	0.0637302	10256	0.5342
10257	7.489e-05	10257	0.000514987	10257	1.10058e-11	10257	0.0399887	10257	0.184436
10258	0.000185501	10258	0.000295724	10258	2.7612e-11	10258	0.0394081	10258	0.0732368
10259	0.00042089	10259	0.000158242	10259	6.51823e-11	10259	0.0625852	10259	0.0365331
10260	0.000862931	10260	0.000105525	10260	1.56345e-10	10260	0.145615	10260	0.0235899
10261	0.00160964	10261	0.000116062	10261	4.25977e-10	10261	0.417382	10261	0.0190182
10262	0.00277308	10262	0.000242622	10262	1.44924e-09	10262	1.22496	10262	0.0175734
10263	0.00446035	10263	0.000895106	10263	6.333e-09	10263	3.18825	10263	0.0167333
10264	0.00664253	10264	0.00445674	10264	3.32818e-08	10264	6.77132	10264	0.0147648
10265	0.00881449	10265	0.0208655	10265	1.80883e-07	10265	11.3677	10265	0.0109127
10266	0.00978464	10266	0.0656298	10266	8.41168e-07	10266	15.1364	10266	0.00613599
10267	0.00855767	10267	0.111264	10267	2.85002e-06	10267	16.5328	10267	0.00242855
10268	0.0058141	10268	0.0964969	10268	6.55493e-06	10268	15.9272	10268	0.000663024
10269	0.00328185	10269	0.0488511	10269	1.07463e-05	10269	15.219	10269	0.000136738
10270	0.00179239	10270	0.0193392	10270	1.45949e-05	10270	16.6406	10270	2.70616e-05
10271	0.00115092	10271	0.00874278	10271	1.97705e-05	10271	23.3808	10271	7.42039e-06
10272	0.00101782	10272	0.00635248	10272	3.04693e-05	10272	43.3488	10272	4.16088e-06
10273	0.00129675	10273	0.00882982	10273	5.40902e-05	10273	96.9298	10273	6.1058e-06
10274	0.00216664	10274	0.0221286	10274	9.95205e-05	10274	220.806	10274	2.28812e-05
10275	0.00392622	10275	0.0778817	10275	0.000162415	10275	435.14	10275	0.000163137
10276	0.00629737	10276	0.278126	10276	0.00020946	10276	684.039	10276	0.00142583
10277	0.00773544	10277	0.753279	10277	0.000209824	10277	879.16	10277	0.00992702
10278	0.00686197	10278	1.2617	10278	0.000176244	10278	1010.26	10278	0.0398806
10279	0.00443617	10279	1.16378	10279	0.000138311	10279	1123.34	10279	0.0768975
10280	0.00216616	10280	0.563988	10280	0.000107373	10280	1223.35	10280	0.067029
10281	0.000822767	10281	0.145239	10281	7.88135e-05	10281	1237.25	10281	0.0274563
10282	0.000248208	10282	0.0214823	10282	4.79428e-05	10282	1091.12	10282	0.00595491
10283	6.19199e-05	10283	0.00213902	10283	2.092e-05	10283	832.36	10283	0.000829228
10284	1.40359e-05	10284	0.000181535	10284	6.10815e-06	10284	590.942	10284	9.61288e-05
10285	3.37899e-06	10285	1.71957e-05	10285	1.26418e-06	10285	441.818	10285	1.25698e-05
10286	1.03482e-06	10286	2.27488e-06	10286	2.21531e-07	10286	386.964	10286	2.49232e-06
10287	4.61961e-07	10287	4.66721e-07	10287	4.16436e-08	10287	409.303	10287	9.2994e-07
10288	3.11067e-07	10288	1.44278e-07	10288	1.03994e-08	10288	493.528	10288	7.05275e-07
10289	2.93568e-07	10289	6.09145e-08	10289	3.94404e-09	10289	609.252	10289	1.01164e-06
10290	3.39753e-07	10290	3.27492e-08	10290	2.38102e-09	10290	697.508	10290	2.29631e-06
10291	4.22665e-07	10291	2.27652e-08	10291	2.26108e-09	10291	705.694	10291	6.62312e-06
10292	5.14932e-07	10292	2.20188e-08	10292	3.22656e-09	10292	638.165	10292	1.96888e-05
10293	5.84046e-07	10293	3.0866e-08	10293	6.41569e-09	10293	544.226	10293	5.06526e-05
10294	6.07192e-07	10294	5.83424e-08	10294	1.60012e-08	10294	470.114	10294	9.88548e-05
10295	5.91756e-07	10295	1.23409e-07	10295	4.46649e-08	10295	442.738	10295	0.000135138
10296	5.81063e-07	10296	2.342e-07	10296	1.28334e-07	10296	486.868	10296	0.000127638
10297	6.4606e-07	10297	3.40342e-07	10297	3.69414e-07	10297	659.261	10297	8.84243e-05
10298	9.15769e-07	10298	3.61071e-07	10298	1.08138e-06	10298	1114.98	10298	5.05389e-05
10299	1.74675e-06	10299	2.91526e-07	10299	3.24413e-06	10299	2237.16	10299	2.71851e-05
10300	4.26206e-06	10300	1.92233e-07	10300	9.55335e-06	10300	4706.61	10300	1.51091e-05
10301	1.17107e-05	10301	1.09188e-07	10301	2.52223e-05	10301	8806.5	10301	8.93036e-06
10302	3.21271e-05	10302	5.55845e-08	10302	5.48135e-05	10302	12665.6	10302	5.53689e-06
10303	8.52469e-05	10303	2.72276e-08	10303	9.6387e-05	10303	13092.8	10303	3.60025e-06
10304	0.000236547	10304	1.47844e-08	10304	0.000148065	10304	10148.6	10304	2.60945e-06
10305	0.000784788	10305	1.08465e-08	10305	0.000227899	10305	6770.43	10305	2.38225e-06
10306	0.00342259	10306	1.28456e-08	10306	0.00039815	10306	4645.15	10306	3.1121e-06
10307	0.0192683	10307	2.61078e-08	10307	0.000826893	10307	3783.67	10307	6.12794e-06
10308	0.121909	10308	8.17327e-08	10308	0.00194235	10308	3843.3	10308	1.68257e-05
10309	0.705608	10309	3.06678e-07	10309	0.00462211	10309	4581.88	10309	5.27357e-05
10310	3.05028	10310	1.01047e-06	10310	0.00995278	10310	5595.92	10310	0.000145152
10311	8.45363	10311	2.19921e-06	10311	0.0180122	10311	6028.49	10311	0.000273151
10312	13.7422	10312	2.58118e-06	10312	0.0266999	10312	5152.73	10312	0.000292048
10313	12.6878	10313	1.48084e-06	10313	0.0326023	10313	3388.52	10313	0.000161048
10314	6.75145	10314	4.212e-07	10314	0.033269	10314	1794.95	10314	4.55685e-05
10315	2.19784	10315	6.81322e-08	10315	0.0287078	10315	847.373	10315	7.22517e-06
10316	0.489393	10316	8.27447e-09	10316	0.0212851	10316	404.061	10316	7.8169e-07
10317	0.0886169	10317	1.15556e-09	10317	0.0141089	10317	219.724	10317	8.08311e-08
10318	0.0165204	10318	3.16983e-10	10318	0.00907095	10318	150.662	10318	1.31356e-08
10319	0.00419039	10319	2.86521e-10	10319	0.00640185	10319	139.902	10319	6.13191e-09
10320	0.00188788	10320	1.14604e-09	10320	0.00568173	10320	181.936	10320	1.38068e-08
10321	0.00178005	10321	1.83324e-08	10321	0.00692027	10321	324.75	10321	2.84508e-07
10322	0.00340406	10322	7.07867e-07	10322	0.0112249	10322	726.116	10322	1.46459e-05
10323	0.0101258	10323	3.14154e-05	10323	0.020162	10323	1723.02	10323	0.00334121
10324	0.0299622	10324	0.000748159	10324	0.0293067	10324	3498.57	10324	0.639951
10325	0.0531967	10325	0.00513448	10325	0.024039	10325	4904.85	10325	16.6714
10326	0.0370355	10326	0.00681533	10326	0.00822494	10326	4068.53	10326	81.0403
10327	0.00799969	10327	0.00152928	10327	0.00101095	10327	1909.07	10327	29.4489
10328	0.000552688	10328	6.83711e-05	10328	4.80062e-05	10328	554.502	10328	1.7734
10329	1.70736e-05	10329	1.0052e-06	10329	1.23128e-06	10329	123.921	10329	0.0138339
10330	4.44225e-07	10330	1.12759e-08	10330	3.0889e-08	10330	28.7116	10330	5.53371e-05
10331	2.23987e-08	10331	2.79234e-10	10331	1.63269e-09	10331	9.27741	10331	2.06443e-07
10332	4.86301e-09	10332	3.99751e-11	10332	3.79929e-10	10332	5.11172	10332	1.89897e-09
10333	7.09368e-09	10333	5.18277e-11	10333	5.96751e-10	10333	5.01321	10333	2.18875e-10
10334	6.23948e-08	10334	4.7495e-10	10334	5.91958e-09	10334	7.81355	10334	3.84634e-10
10335	1.86078e-06	10335	1.49645e-08	10335	2.23871e-07	10335	15.7047	10335	3.44636e-09
10336	8.76482e-05	10336	7.29429e-07	10336	1.57841e-05	10336	32.5085	10336	7.32061e-08
10337	0.00323671	10337	2.94252e-05	10337	0.0010258	10337	57.7449	10337	3.20682e-06
10338	0.0560215	10338	0.000652902	10338	0.0348661	10338	78.1444	10338	0.000147959
10339	0.335299	10339	0.00621091	10339	0.421886	10339	75.6078	10339	0.00200419
10340	0.621849	10340	0.0217862	10340	1.48963	10340	50.9753	10340	0.0262292
10341	0.379668	10341	0.0261033	10341	1.50083	10341	23.9841	10341	0.154372
10342	0.0937993	10342	0.0107593	10342	0.496893	10342	8.12277	10342	0.114281
10343	0.0129587	10343	0.0017069	10343	0.0719794	10343	2.12389	10343	0.024199
10344	0.00149517	10344	0.000130886	10344	0.00680621	10344	0.480971	10344	0.0026554
10345	0.000220064	10345	6.73001e-06	10345	0.000666958	10345	0.109933	10345	0.000245434
10346	6.01646e-05	10346	3.40311e-07	10346	0.000106265	10346	0.0300812	10346	2.20824e-05
10347	3.92785e-05	10347	2.47289e-08	10347	3.90658e-05	10347	0.0115649	10347	2.31401e-06
10348	6.52571e-05	10348	3.56287e-09	10348	3.91865e-05	10348	0.00705675	10348	5.25149e-07
10349	0.000238493	10349	1.27651e-09	10349	0.000101038	10349	0.00727479	10349	2.66176e-07
10350	0.00139312	10350	1.25762e-09	10350	0.000510153	10350	0.0125395	10350	3.41261e-07
10351	0.00861577	10351	3.2111e-09	10351	0.00333725	10351	0.0330549	10351	6.22907e-07
10352	0.0373971	10352	1.66829e-08	10352	0.0179189	10352	0.113085	10352	3.1696e-06
10353	0.0814886	10353	1.17826e-07	10353	0.0524164	10353	0.402909	10353	3.86863e-05
10354	0.0721269	10354	6.96888e-07	10354	0.0619678	10354	1.177	10354	0.00072626
10355	0.0243458	10355	2.19807e-06	10355	0.0255351	10355	2.29107	10355	0.00472558
10356	0.00346174	10356	2.71292e-06	10356	0.00376285	10356	2.6292	10356	0.0163614
10357	0.000271346	10357	1.19966e-06	10357	0.00024539	10357	1.78492	10357	0.00693483
10358	1.79987e-05	10358	2.27515e-07	10358	1.05857e-05	10358	0.826951	10358	0.00125983
10359	1.72858e-06	10359	2.91272e-08	10359	5.28488e-07	10359	0.338112	10359	0.000125626
10360	4.07479e-07	10360	4.8764e-09	10360	5.67334e-08	10360	0.165347	10360	1.1546e-05
10361	3.33251e-07	10361	2.13122e-09	10361	2.16565e-08	10361	0.125052	10361	3.16167e-06
10362	9.6e-07	10362	3.82985e-09	10362	3.55653e-08	10362	0.165914	10362	3.89468e-06
10363	6.93663e-06	10363	2.84127e-08	10363	2.03717e-07	10363	0.371785	10363	1.27086e-05
10364	7.1222e-05	10364	5.60992e-07	10364	2.43884e-06	10364	1.18706	10364	0.000145906
10365	0.000568965	10365	1.52435e-05	10365	3.35792e-05	10365	4.29683	10365	0.00301743
10366	0.0022012	10366	0.00030802	10366	0.000327765	10366	14.2649	10366	0.0494858
10367	0.00318358	10367	0.00307544	10367	0.00173148	10367	37.5035	10367	0.53097
10368	0.00168445	10368	0.012916	10368	0.00469189	10368	72.9414	10368	1.877
10369	0.000395778	10369	0.0239783	10369	0.00722386	10369	104.459	10369	4.61159
10370	5.88227e-05	10370	0.0237484	10370	0.0075169	10370	113.227	10370	4.53399
10371	8.48381e-06	10371	0.0160594	10371	0.00628055	10371	95.6068	10371	2.84161
10372	1.76814e-06	10372	0.00942728	10372	0.00483688	10372	63.7933	10372	1.06746
10373	7.01875e-07	10373	0.00585056	10373	0.00383997	10373	33.8505	10373	0.666783
10374	5.90397e-07	10374	0.00443813	10374	0.00350281	10374	14.5933	10374	0.242245
10375	9.96408e-07	10375	0.00452176	10375	0.0040848	10375	5.42598	10375	0.103724
10376	2.84824e-06	10376	0.00642012	10376	0.00654343	10376	1.93095	10376	0.0364204
10377	1.10206e-05	10377	0.0122963	10377	0.0142907	10377	0.748596	10377	0.00963926
10378	4.63612e-05	10378	0.0287214	10378	0.0384046	10378	0.355755	10378	0.00432167
10379	0.000180722	10379	0.0710809	10379	0.107768	10379	0.222733	10379	0.00364547
10380	0.000613244	10380	0.163016	10380	0.268255	10380	0.185965	10380	0.00245022
10381	0.00188475	10381	0.316919	10381	0.530609	10381	0.199062	10381	0.00131499
10382	0.00580919	10382	0.504257	10382	0.798839	10382	0.253591	10382	0.00165117
10383	0.0196607	10383	0.656571	10383	0.917223	10383	0.347926	10383	0.00109612
10384	0.0738928	10384	0.705312	10384	0.814918	10384	0.454427	10384	0.000832843
10385	0.282495	10385	0.6282	10385	0.566906	10385	0.490832	10385	0.0010158
10386	0.948907	10386	0.469616	10386	0.315795	10386	0.38238	10386	0.00115642
10387	2.44381	10387	0.306038	10387	0.149582	10387	0.195048	10387	0.000506346
10388	4.48328	10388	0.186029	10388	0.067233	10388	0.0640559	10388	0.000208188
10389	5.86755	10389	0.113868	10389	0.032873	10389	0.0148591	10389	0.000119367
10390	5.78712	10390	0.073843	10390	0.0195629	10390	0.00300006	10390	0.000103139
10391	4.63494	10391	0.0508474	10391	0.0147412	10391	0.000709795	10391	4.29685e-05
10392	3.22993	10392	0.0357472	10392	0.0134185	10392	0.00027039	10392	4.19257e-05
10393	2.0639	10393	0.0244308	10393	0.0132717	10393	0.000210601	10393	4.10611e-05
10394	1.25124	10394	0.0158013	10394	0.0126975	10394	0.00035874	10394	2.32761e-05
10395	0.7321	10395	0.00973722	10395	0.0108221	10395	0.00116351	10395	1.60381e-05
10396	0.415799	10396	0.00589315	10396	0.0080597	10396	0.00535241	10396	1.63233e-05
10397	0.231478	10397	0.00364319	10397	0.00557116	10397	0.0247861	10397	1.41486e-05
10398	0.131289	10398	0.00240965	10398	0.00413266	10398	0.087114	10398	1.14528e-05
10399	0.0830285	10399	0.00182154	10399	0.00407583	10399	0.199545	10399	6.29405e-06
10400	0.0675661	10400	0.00173252	10400	0.00674328	10400	0.297473	10400	8.67301e-06
10401	0.0831867	10401	0.002322	10401	0.0220936	10401	0.328523	10401	1.70263e-05
10402	0.173882	10402	0.00479222	10402	0.145404	10402	0.332193	10402	1.65933e-05
10403	0.618411	10403	0.0154298	10403	1.61947	10403	0.386859	10403	2.87472e-05
10404	3.25853	10404	0.0707552	10404	22.3033	10404	0.622836	10404	0.000113483
10405	19.835	10405	0.385441	10405	264.448	10405	1.51606	10405	0.00189909
10406	104.443	10406	1.99478	10406	1966.64	10406	5.46529	10406	0.0150572
10407	368.239	10407	7.95872	10407	7408.8	10407	25.9259	10407	0.0457179
10408	732.603	10408	21.0638	10408	12894.1	10408	134.929	10408	0.199933
10409	773.737	10409	34.5607	10409	10593.3	10409	630.049	10409	0.449067
10410	457.495	10410	35.8602	10410	4611.45	10410	2212.46	10410	0.337765
10411	176.729	10411	25.8628	10411	1279.63	10411	5189.09	10411	0.0649794
10412	55.8063	10412	14.8918	10412	283.635	10412	7770.6	10412	0.0110593
10413	18.3651	10413	7.8752	10413	63.4119	10413	7621.75	10413	0.00148194
10414	7.70793	10414	4.2401	10414	17.5791	10414	5306.22	10414	0.000386321
10415	4.63243	10415	2.44586	10415	7.03308	10415	2943.01	10415	0.000292268
10416	4.06444	10416	1.53168	10416	4.40828	10416	1484.83	10416	0.00037169
10417	4.93005	10417	1.04441	10417	4.373	10417	777.856	10417	0.000453437
10418	7.51241	10418	0.781164	10418	6.48316	10418	472.287	10418	0.001122
10419	12.8068	10419	0.64177	10419	12.7832	10419	353.553	10419	0.00369114
10420	21.4904	10420	0.563242	10420	28.5638	10420	324.838	10420	0.00746933
10421	31.1381	10421	0.493607	10421	60.774	10421	342.373	10421	0.0310402
10422	34.8083	10422	0.394994	10422	106.334	10422	373.449	10422	0.0516593
10423	28.1981	10423	0.268287	10423	141.63	10423	381.389	10423	0.0230386
10424	16.814	10424	0.151604	10424	146.275	10424	340.922	10424	0.00884188
10425	8.18878	10425	0.0747574	10425	130.988	10425	260.849	10425	0.00250911
10426	3.88334	10426	0.0356004	10426	120.568	10426	174.38	10426	0.000828686
10427	2.19841	10427	0.0184374	10427	135.162	10427	107.66	10427	0.000279645
10428	1.76495	10428	0.0114046	10428	205.474	10428	66.4915	10428	0.000138596
10429	2.19279	10429	0.00874895	10429	426.519	10429	44.8624	10429	0.000264897
10430	4.12101	10430	0.00809945	10430	1101.55	10430	35.4855	10430	0.00109154
10431	10.3641	10431	0.00832957	10431	3015.93	10431	33.7188	10431	0.0113458
10432	28.8789	10432	0.00841286	10432	7280.39	10432	37.06	10432	0.0816842
10433	71.7216	10433	0.00716506	10433	13010.6	10433	43.0448	10433	0.492954
10434	128.222	10434	0.00434201	10434	14903.2	10434	47.408	10434	2.02088
10435	138.26	10435	0.00159544	10435	9948.28	10435	45.5903	10435	2.06773
10436	81.3716	10436	0.000323048	10436	3789.9	10436	37.4836	10436	1.15187
10437	26.7573	10437	3.77406e-05	10437	897.65	10437	27.8649	10437	0.149873
10438	5.90055	10438	3.29815e-06	10438	163.959	10438	21.1852	10438	0.00945631
10439	1.22316	10439	3.5043e-07	10439	32.1629	10439	19.2092	10439	0.000371329
10440	0.361608	10440	8.21609e-08	10440	9.8112	10440	23.5167	10440	3.15494e-05
10441	0.2154	10441	6.64808e-08	10441	6.13008	10441	39.973	10441	1.14061e-05
10442	0.289634	10442	1.91102e-07	10442	8.27118	10442	84.52	10442	1.88273e-05
10443	0.734871	10443	1.2489e-06	10443	19.6605	10443	175.729	10443	0.00020013
10444	2.41052	10444	9.16723e-06	10444	56.9656	10444	268.935	10444	0.00337425
10445	6.9082	10445	3.93706e-05	10445	138.458	10445	237.935	10445	0.0337087
10446	13.5665	10446	6.7571e-05	10446	221.868	10446	110.423	10446	0.0529017
10447	17.8699	10447	4.48915e-05	10447	225.211	10447	29.9026	10447	0.0127957
10448	18.8209	10448	1.5458e-05	10448	168.887	10448	6.4449	10448	0.00103813
10449	20.8498	10449	4.59733e-06	10449	123.563	10449	1.71472	10449	4.75198e-05
10450	30.8792	10450	2.0492e-06	10450	118.073	10450	0.858201	10450	1.76535e-06
10451	67.2729	10451	1.99917e-06	10451	178.07	10451	1.02587	10451	6.96501e-08
10452	198.244	10452	4.51824e-06	10452	429.449	10452	2.8201	10452	1.63277e-08
10453	637.44	10453	1.82394e-05	10453	1408.72	10453	13.4366	10453	1.37026e-08
10454	1736.01	10454	8.54045e-05	10454	4802.99	10454	74.0583	10454	2.45018e-08
10455	3257.74	10455	0.000304003	10455	12833.2	10455	318.534	10455	7.80009e-08
10456	3774.1	10456	0.000618055	10456	21638.8	10456	795.188	10456	3.71907e-07
10457	2690.47	10457	0.000650689	10457	20712.2	10457	981.749	10457	1.33893e-06
10458	1281.42	10458	0.000384957	10458	11417.5	10458	590.411	10458	3.94952e-06
10459	463.132	10459	0.00015845	10459	4071.19	10459	195.604	10459	3.30203e-06
10460	144.325	10460	5.96336e-05	10460	1124.67	10460	45.3549	10460	3.01463e-06
10461	42.6993	10461	2.64837e-05	10461	293.4	10461	10.04	10461	2.59182e-06
10462	12.6978	10462	1.6562e-05	10462	85.6502	10462	2.89248	10462	1.4858e-06
10463	3.91567	10463	1.56734e-05	10463	31.0895	10463	1.35885	10463	1.59854e-06
10464	1.28197	10464	2.18044e-05	10464	14.3366	10464	1.1261	10464	3.16381e-06
10465	0.455317	10465	3.98282e-05	10465	7.89614	10465	1.52024	10465	5.27228e-06
10466	0.177045	10466	8.01048e-05	10466	4.59245	10466	2.74853	10466	1.43831e-05
10467	0.0742343	10467	0.000144226	10467	2.44052	10467	5.22314	10467	3.67841e-05
10468	0.0325593	10468	0.00019361	10468	1.05535	10468	8.38442	10468	0.000102339
10469	0.014847	10469	0.000178486	10469	0.357966	10469	9.89599	10469	0.000537408
10470	0.00755335	10470	0.00012393	10470	0.102996	10470	8.40908	10470	0.00101861
10471	0.00509407	10471	8.69291e-05	10471	0.0305725	10471	5.73285	10471	0.000836138
10472	0.00574295	10472	9.3932e-05	10472	0.0121884	10472	3.86176	10472	0.000550023
10473	0.012914	10473	0.00022431	10473	0.00821394	10473	3.23504	10473	0.000560416
10474	0.0574644	10474	0.00127919	10474	0.0101337	10474	3.90048	10474	0.000834162
10475	0.397031	10475	0.0129335	10475	0.0200368	10475	6.67397	10475	0.00463982
10476	2.84642	10476	0.133484	10476	0.0466565	10476	13.6942	10476	0.0249638
10477	13.9704	10477	0.796471	10477	0.0886334	10477	26.581	10477	0.112251
10478	34.9169	10478	1.8663	10478	0.102002	10478	40.0227	10478	0.181233
10479	39.9021	10479	1.52843	10479	0.0617676	10479	42.6669	10479	0.100308
10480	22.6933	10480	0.506306	10480	0.0206128	10480	32.9246	10480	0.0270122
10481	8.14586	10481	0.0951476	10481	0.00468788	10481	20.2155	10481	0.00554447
10482	2.55197	10482	0.0154596	10482	0.000996674	10482	11.0612	10482	0.0014566
10483	0.970516	10483	0.00319188	10483	0.000275587	10483	5.94851	10483	0.000434594
10484	0.579043	10484	0.00108621	10484	0.000127853	10484	3.40783	10484	0.000267809
10485	0.615726	10485	0.000680265	10485	0.000112756	10485	2.2503	10485	0.000203352
10486	1.14954	10486	0.000778124	10486	0.000187983	10486	1.85841	10486	0.000233237
10487	3.30582	10487	0.00150489	10487	0.000536991	10487	2.03979	10487	0.000168316
10488	11.9933	10488	0.00437881	10488	0.00226652	10488	2.97507	10488	0.000306411
10489	44.0312	10489	0.0165642	10489	0.0119223	10489	5.29486	10489	0.000959409
10490	133.673	10490	0.0688903	10490	0.0655763	10490	9.86006	10490	0.00309185
10491	287.418	10491	0.265128	10491	0.321053	10491	16.1896	10491	0.0130562
10492	399.988	10492	0.808011	10492	1.24118	10492	20.4997	10492	0.0445995
10493	353.708	10493	1.72535	10493	3.59113	10493	18.6954	10493	0.0886928
10494	208.932	10494	2.38469	10494	7.93899	10494	12.1599	10494	0.0898789
10495	91.6776	10495	2.07704	10495	14.4919	10495	5.74963	10495	0.0378299
10496	34.5063	10496	1.18629	10496	24.0061	10496	2.01784	10496	0.0109855
10497	13.0662	10497	0.501528	10497	38.5479	10497	0.535819	10497	0.00225471
10498	5.80556	10498	0.192331	10498	60.6541	10498	0.112538	10498	0.000330667
10499	3.455	10499	0.0863392	10499	90.1481	10499	0.0208798	10499	0.000157494
10500	3.04406	10500	0.05774	10500	120.681	10500	0.00418152	10500	0.000107825
10501	4.20758	10501	0.066597	10501	143.065	10501	0.00117647	10501	0.000176034
10502	9.13839	10502	0.131945	10502	155.19	10502	0.000589976	10502	0.000574157
10503	29.0825	10503	0.385565	10503	164.833	10503	0.000581395	10503	0.00157881
10504	117.378	10504	1.30494	10504	182.851	10504	0.00100927	10504	0.00848633
10505	492.613	10505	3.99229	10505	217.358	10505	0.00233111	10505	0.104581
10506	1742.41	10506	9.17734	10506	270.243	10506	0.00511584	10506	0.726878
10507	4369.26	10507	14.5162	10507	331.586	10507	0.0081242	10507	1.34078
10508	7027.38	10508	15.8884	10508	376.42	10508	0.00810819	10508	1.27395
10509	7146.46	10509	12.9157	10509	376.618	10509	0.00505663	10509	0.902864
10510	4899.39	10510	8.62076	10510	325.844	10510	0.00216567	10510	0.488273
10511	2563.19	10511	5.24883	10511	248.747	10511	0.000741712	10511	0.170958
10512	1202.15	10512	3.23053	10512	178.974	10512	0.000243486	10512	0.0760285
10513	599.597	10513	2.22019	10513	134.751	10513	9.30554e-05	10513	0.0205117
10514	367.531	10514	1.85141	10514	118.496	10514	4.99592e-05	10514	0.00371156
10515	299.308	10515	1.93715	10515	129.15	10515	4.33998e-05	10515	0.00139292
10516	318.779	10516	2.41412	10516	167.544	10516	6.36013e-05	10516	0.00189708
10517	400.487	10517	3.09702	10517	223.586	10517	0.000143422	10517	0.00902218
10518	511.34	10518	3.3348	10518	251.265	10518	0.000404451	10518	0.0369713
10519	577.984	10519	2.47646	10519	200.439	10519	0.00110949	10519	0.0666947
10520	532.861	10520	1.12315	10520	106.019	10520	0.00241406	10520	0.225003
10521	397.435	10521	0.310664	10521	39.7224	10521	0.00381073	10521	0.136982
10522	253.546	10522	0.0598893	10522	12.6135	10522	0.00456449	10522	0.0283275
10523	151.598	10523	0.010338	10523	4.26196	10523	0.00480569	10523	0.0037809
10524	93.3918	10524	0.00219467	10524	1.85932	10524	0.00534241	10524	0.000257418
10525	63.8715	10525	0.00077805	10525	1.15578	10525	0.00729833	10525	2.56486e-05
10526	50.8984	10526	0.000567709	10526	1.01823	10526	0.013313	10526	4.93806e-06
10527	48.7678	10527	0.000901143	10527	1.18673	10527	0.0331105	10527	2.00736e-06
10528	57.739	10528	0.00282119	10528	1.69631	10528	0.111214	10528	3.00699e-06
10529	86.661	10529	0.0142331	10529	2.83789	10529	0.496558	10529	2.91601e-05
10530	166.219	10530	0.0905569	10530	5.44564	10530	2.87192	10530	0.000330042
10531	392.402	10531	0.565922	10531	11.6752	10531	20.2525	10531	0.00246362
10532	1026.17	10532	2.72194	10532	26.0741	10532	154.872	10532	0.084492
10533	2508.56	10533	7.95681	10533	53.3429	10533	1080.91	10533	0.804483
10534	4703.98	10534	11.4105	10534	85.0003	10534	5641.41	10534	2.31346
10535	5722.21	10535	6.85993	10535	91.8941	10535	18311.8	10535	1.84431
10536	4164.58	10536	1.64312	10536	64.2187	10536	32424.9	10536	0.350613
10537	1882.41	10537	0.173688	10537	31.494	10537	29685.8	10537	0.0140385
10538	612.763	10538	0.0107177	10538	13.2797	10538	14528	10538	0.00034584
10539	177.441	10539	0.000596904	10539	6.21988	10539	4282.17	10539	4.16556e-06
10540	56.0714	10540	4.979e-05	10540	3.97939	10540	926.527	10540	1.19943e-07
10541	22.1904	10541	9.62761e-06	10541	3.74858	10541	190.885	10541	1.8804e-08
10542	11.5882	10542	5.4166e-06	10542	4.85698	10542	49.9194	10542	1.78032e-08
10543	7.91963	10543	8.48716e-06	10543	7.4593	10543	21.3303	10543	4.87775e-08
10544	6.882	10544	2.83424e-05	10544	11.7795	10544	17.0685	10544	6.13819e-07
10545	7.38364	10545	0.0001377	10545	17.6883	10545	24.5027	10545	1.10547e-05
10546	9.3907	10546	0.000657318	10546	25.0365	10546	50.4308	10546	0.000115999
10547	13.1529	10547	0.00220358	10547	34.3641	10547	106.584	10547	0.000495652
10548	18.1768	10548	0.00408523	10548	46.9218	10548	165.914	10548	0.00249006
10549	21.9809	10549	0.00373425	10549	63.6896	10549	150.792	10549	0.00317564
10550	21.2444	10550	0.00172575	10550	83.5415	10550	73.7863	10550	0.0010409
10551	15.8403	10551	0.000471808	10551	101.244	10551	20.7818	10551	0.000139944
10552	9.26669	10552	9.76474e-05	10552	107.842	10552	3.98438	10552	1.23621e-05
10553	4.44892	10553	1.99267e-05	10553	96.5871	10553	0.63713	10553	1.4488e-06
10554	1.84564	10554	4.95554e-06	10554	71.0559	10554	0.102482	10554	3.07704e-07
10555	0.701687	10555	1.7153e-06	10555	43.7966	10555	0.0194811	10555	9.93009e-08
10556	0.266587	10556	9.00201e-07	10556	24.5765	10556	0.00514453	10556	4.1283e-08
10557	0.115294	10557	7.85048e-07	10557	14.5307	10557	0.00227607	10557	1.08337e-07
10558	0.0664682	10558	1.27145e-06	10558	10.7776	10558	0.00203949	10558	1.38263e-07
10559	0.0582547	10559	4.11695e-06	10559	11.5261	10559	0.00413533	10559	1.89265e-07
10560	0.0807065	10560	2.5204e-05	10560	18.5166	10560	0.0178839	10560	9.41697e-07
10561	0.161919	10561	0.000230344	10561	41.1792	10561	0.127335	10561	2.34173e-05
10562	0.38874	10562	0.00215372	10562	106.456	10562	1.00109	10562	0.000609966
10563	0.89173	10563	0.013626	10563	261.215	10563	5.64537	10563	0.00722972
10564	1.62784	10564	0.0417009	10564	515.466	10564	15.87	10564	0.0406506
10565	2.16351	10565	0.0516243	10565	749.522	10565	17.5925	10565	0.100181
10566	2.13264	10566	0.0262799	10566	805.299	10566	7.14193	10566	0.0853252
10567	1.73104	10567	0.00683088	10567	693.71	10567	1.17638	10567	0.0183611
10568	1.3392	10568	0.00133418	10568	547.378	10568	0.10455	10568	0.0032978
10569	1.1346	10569	0.000315735	10569	458.726	10569	0.00786168	10569	0.000442341
10570	1.15988	10570	0.00014001	10570	462.203	10570	0.000863441	10570	3.89928e-05
10571	1.49672	10571	0.000147741	10571	599.32	10571	0.000229899	10571	6.49112e-06
10572	2.44173	10572	0.000350245	10572	994.354	10572	0.000200396	10572	6.75699e-06
10573	4.88189	10573	0.00134313	10573	1949.68	10573	0.000565374	10573	1.30309e-05
10574	11.2566	10574	0.00523579	10574	3941.78	10574	0.00386339	10574	0.00013512
10575	27.2977	10575	0.0133103	10575	6980.84	10575	0.0418821	10575	0.000883933
10576	61.8873	10576	0.0161039	10576	9303.06	10576	0.481696	10576	0.00352072
10577	116.061	10577	0.008073	10577	8413.03	10577	4.37484	10577	0.00526178
10578	163.628	10578	0.00175143	10578	5030.77	10578	26.2897	10578	0.0039559
10579	166.786	10579	0.000202231	10579	2125.82	10579	95.5422	10579	0.0022066
10580	127.334	10580	1.73702e-05	10580	742.487	10580	201.517	10580	0.000893547
10581	81.2941	10581	1.67169e-06	10581	268.433	10581	243.348	10581	0.000354207
10582	51.1547	10582	2.71477e-07	10582	128.613	10582	170.897	10582	0.000104369
10583	37.7346	10583	1.01833e-07	10583	99.6927	10583	73.9996	10583	4.70784e-05
10584	36.7269	10584	9.9856e-08	10584	134.825	10584	21.9923	10584	3.31841e-05
10585	47.3111	10585	2.27766e-07	10585	289.172	10585	5.15332	10585	3.4124e-05
10586	70.6569	10586	8.72883e-07	10586	765.21	10586	1.08523	10586	6.34554e-05
10587	97.4626	10587	3.67303e-06	10587	1798.22	10587	0.223168	10587	0.00018467
10588	98.2846	10588	1.15099e-05	10588	2779.65	10588	0.04592	10588	0.000501194
10589	62.8043	10589	2.11984e-05	10589	2367.37	10589	0.00945369	10589	0.000854497
10590	25.7991	10590	2.24202e-05	10590	1114.65	10590	0.00202444	10590	0.000632734
10591	8.16932	10591	1.63923e-05	10591	352.313	10591	0.000512775	10591	0.000123498
10592	2.66674	10592	1.13552e-05	10592	105.046	10592	0.000190138	10592	1.80752e-05
10593	1.19639	10593	1.01126e-05	10593	43.4232	10593	0.000128821	10593	3.65238e-06
10594	0.872486	10594	1.35137e-05	10594	33.4626	10594	0.0001791	10594	1.67428e-06
10595	1.0298	10595	2.57505e-05	10595	53.1187	10595	0.00047753	10595	4.02547e-06
10596	1.71938	10596	5.79137e-05	10596	154.493	10596	0.00192652	10596	2.91129e-05
10597	3.4272	10597	0.000126422	10597	633.201	10597	0.00860393	10597	0.000149993
10598	7.16506	10598	0.000241349	10598	2712.74	10598	0.0321041	10598	0.000611167
10599	14.5712	10599	0.000401549	10599	9466.72	10599	0.0830658	10599	0.00353897
10600	27.3105	10600	0.000602048	10600	22897.3	10600	0.137397	10600	0.0149708
10601	44.1095	10601	0.00080849	10601	35731.5	10601	0.145324	10601	0.0958949
10602	56.5917	10602	0.000904332	10602	36085.6	10602	0.103478	10602	0.186415
10603	54.288	10603	0.000766309	10603	25008.5	10603	0.0539011	10603	0.146634
10604	39.128	10604	0.000476716	10604	13091.4	10604	0.0229154	10604	0.0990529
10605	23.2418	10605	0.000241451	10605	5821.39	10605	0.00912255	10605	0.0405699
10606	13.3941	10606	0.00012759	10606	2495.2	10606	0.00399856	10606	0.0112891
10607	8.98423	10607	9.68778e-05	10607	1169.43	10607	0.00228164	10607	0.00496009
10608	8.04035	10608	0.000136924	10608	672.779	10608	0.00193717	10608	0.00586454
10609	10.0218	10609	0.000386769	10609	518.477	10609	0.00256526	10609	0.0153528
10610	16.3229	10610	0.00186013	10610	551.934	10610	0.00488764	10610	0.128022
10611	29.9146	10611	0.0109338	10611	769.196	10611	0.0108646	10611	1.0945
10612	50.7382	10612	0.0532031	10612	1215.25	10612	0.0210287	10612	4.88486
10613	65.3123	10613	0.151438	10613	1775.78	10613	0.0261738	10613	21.5571
10614	54.1643	10614	0.196947	10614	1959.06	10614	0.0164222	10614	41.0358
10615	26.185	10615	0.103279	10615	1420.94	10615	0.00455043	10615	14.0277
10616	7.25899	10616	0.0218914	10616	656.475	10616	0.000562371	10616	2.88195
10617	1.2463	10617	0.00214107	10617	209.584	10617	3.66132e-05	10617	0.312022
10618	0.157215	10618	0.000126024	10618	54.6812	10618	1.73443e-06	10618	0.0159542
10619	0.0187973	10619	6.62137e-06	10619	14.341	10619	9.43929e-08	10619	0.000395771
10620	0.00290911	10620	5.05214e-07	10620	4.60115	10620	9.97748e-09	10620	1.22704e-05
10621	0.00079694	10621	9.07284e-08	10621	2.08766	10621	3.27399e-09	10621	7.62583e-07
10622	0.000485251	10622	5.29559e-08	10622	1.43067	10622	4.3059e-09	10622	7.3859e-08
10623	0.000692621	10623	1.02118e-07	10623	1.44165	10623	2.12878e-08	10623	2.78517e-08
10624	0.00198386	10624	4.74372e-07	10624	1.90954	10624	2.76056e-07	10624	3.51351e-08
10625	0.00839416	10625	3.16887e-06	10625	2.82585	10625	5.59685e-06	10625	2.68945e-07
10626	0.037484	10626	1.82568e-05	10626	3.99242	10626	0.000105735	10626	1.9213e-06
10627	0.136935	10627	6.40398e-05	10627	4.88071	10627	0.00122418	10627	4.94123e-06
10628	0.361185	10628	0.00012016	10628	5.09344	10628	0.00647264	10628	4.13947e-06
10629	0.677327	10629	0.000127098	10629	4.81533	10629	0.0129942	10629	2.24916e-06
10630	0.93843	10630	8.75585e-05	10630	4.53698	10630	0.00901259	10630	1.28137e-06
10631	1.00368	10631	4.52659e-05	10631	4.68607	10631	0.00215393	10631	5.39808e-07
10632	0.858359	10632	1.91026e-05	10632	5.73444	10632	0.00019918	10632	1.64758e-07
10633	0.612211	10633	6.7903e-06	10633	8.78745	10633	9.33367e-06	10633	3.02885e-08
10634	0.389165	10634	2.08524e-06	10634	17.2092	10634	3.41627e-07	10634	9.78367e-09
10635	0.240112	10635	5.9203e-07	10635	41.2694	10635	1.67331e-08	10635	3.73589e-09
10636	0.155279	10636	1.76822e-07	10636	106.684	10636	1.82225e-09	10636	3.46893e-09
10637	0.109983	10637	6.61047e-08	10637	244.441	10637	6.04226e-10	10637	3.96504e-09
10638	0.0865403	10638	3.71162e-08	10638	406.007	10638	6.3308e-10	10638	8.29795e-09
10639	0.0767557	10639	3.64887e-08	10639	432.099	10639	1.73453e-09	10639	2.28142e-08
10640	0.0802564	10640	6.89424e-08	10640	299.361	10640	9.31048e-09	10640	1.35233e-07
10641	0.106471	10641	2.50901e-07	10641	158.781	10641	7.32421e-08	10641	8.5574e-07
10642	0.190574	10642	1.56328e-06	10642	82.7474	10642	6.47077e-07	10642	5.81024e-06
10643	0.459197	10643	1.30265e-05	10643	53.3998	10643	4.97008e-06	10643	5.4812e-05
10644	1.36681	10644	0.000102964	10644	47.8613	10644	2.58793e-05	10644	0.00059051
10645	4.38296	10645	0.000536083	10645	57.6282	10645	7.3883e-05	10645	0.00749322
10646	13.3882	10646	0.00137345	10646	81.8511	10646	0.000101738	10646	0.0626013
10647	36.833	10647	0.00150875	10647	119.419	10647	6.72293e-05	10647	0.1511
10648	93.192	10648	0.000754302	10648	164.458	10648	2.41938e-05	10648	0.0753735
10649	230.639	10649	0.000219568	10649	208.555	10649	5.94275e-06	10649	0.0199671
10650	583.76	10650	5.32192e-05	10650	243.577	10650	1.28723e-06	10650	0.00563139
10651	1486.23	10651	1.50948e-05	10651	258.815	10651	3.01938e-07	10651	0.000760473
10652	3508.06	10652	6.07729e-06	10652	242.241	10652	8.49301e-08	10652	0.000214132
10653	6870.09	10653	3.45227e-06	10653	194.845	10653	2.88133e-08	10653	0.000147376
10654	10203.8	10654	2.39962e-06	10654	138.011	10654	1.14468e-08	10654	9.37212e-05
10655	11132.9	10655	1.75626e-06	10655	94.7774	10655	5.35753e-09	10655	5.82194e-05
10656	9216	10656	1.28072e-06	10656	73.1923	10656	3.17503e-09	10656	5.78336e-05
10657	6234.78	10657	9.82988e-07	10657	73.0507	10657	2.64267e-09	10657	3.04143e-05
10658	3740.34	10658	8.71646e-07	10658	99.7991	10658	3.26375e-09	10658	1.50712e-05
10659	2120.26	10659	9.17312e-07	10659	175.049	10659	5.61297e-09	10659	2.26852e-05
10660	1183.64	10660	1.03204e-06	10660	333.328	10660	1.11583e-08	10660	5.11354e-05
10661	671.287	10661	9.96844e-07	10661	558.137	10661	2.01346e-08	10661	7.92233e-05
10662	398.297	10662	6.42611e-07	10662	681.333	10662	2.68626e-08	10662	6.64811e-05
10663	251.8	10663	2.2976e-07	10663	538.028	10663	2.38837e-08	10663	1.59175e-05
10664	167.295	10664	4.38474e-08	10664	266.683	10664	1.4361e-08	10664	4.123e-06
10665	110.624	10665	5.23762e-09	10665	89.1622	10665	6.54638e-09	10665	7.40316e-07
10666	67.7709	10666	5.69157e-10	10666	24.2331	10666	2.70457e-09	10666	5.89068e-08
10667	37.0289	10667	9.72096e-11	10667	7.23862	10667	1.24008e-09	10667	3.68355e-09
10668	18.8684	10668	4.66624e-11	10668	3.45194	10668	7.55797e-10	10668	4.36943e-10
10669	10.3073	10669	9.27798e-11	10669	3.6776	10669	6.80305e-10	10669	1.3917e-10
10670	7.28542	10670	7.57378e-10	10670	10.1903	10670	8.91051e-10	10670	2.63085e-10
10671	7.68864	10671	1.64815e-08	10671	64.3985	10671	1.46977e-09	10671	1.48108e-09
10672	12.1507	10672	4.83478e-07	10672	625.973	10672	2.4194e-09	10672	9.59303e-09
10673	24.1323	10673	9.54516e-06	10673	5510.63	10673	3.11143e-09	10673	1.95306e-07
10674	44.359	10674	7.40896e-05	10674	26266.2	10674	2.60335e-09	10674	2.58868e-06
10675	54.2907	10675	0.000166587	10675	45901.6	10675	1.31077e-09	10675	9.42693e-06
10676	34.8603	10676	0.000102616	10676	23892	10676	4.09921e-10	10676	2.13628e-05
10677	11.0041	10677	2.09426e-05	10677	3715.61	10677	8.95736e-11	10677	1.47226e-05
10678	1.97389	10678	2.15201e-06	10678	218.555	10678	1.62137e-11	10678	7.81677e-06
10679	0.283318	10679	2.02019e-07	10679	7.86841	10679	2.9606e-12	10679	2.80711e-06
10680	0.0519782	10680	3.33506e-08	10680	0.346783	10680	6.74272e-13	10680	8.11769e-07
10681	0.0192437	10681	1.63101e-08	10681	0.0400603	10681	2.37792e-13	10681	4.28363e-07
10682	0.0188167	10682	2.85068e-08	10682	0.0211779	10682	1.56583e-13	10682	5.07832e-07
10683	0.0464082	10683	1.41661e-07	10683	0.0555424	10683	2.12126e-13	10683	8.08409e-07
10684	0.203315	10684	1.1652e-06	10684	0.461922	10684	5.61905e-13	10684	2.6077e-06
10685	0.953248	10685	8.43805e-06	10685	5.76746	10685	2.37107e-12	10685	4.03959e-05
10686	2.99055	10686	3.22975e-05	10686	52.2688	10686	1.18732e-11	10686	0.00015957
10687	4.7032	10687	5.02297e-05	10687	210.273	10687	5.3423e-11	10687	0.000201205
10688	3.53043	10688	3.23687e-05	10688	308.996	10688	1.82506e-10	10688	0.000103778
10689	1.50062	10689	1.12292e-05	10689	176.596	10689	4.65573e-10	10689	2.38612e-05
10690	0.49221	10690	3.12801e-06	10690	49.6205	10690	9.95535e-10	10690	6.09088e-06
10691	0.173329	10691	1.03854e-06	10691	9.32104	10691	2.13819e-09	10691	2.23745e-06
10692	0.0831974	10692	5.35558e-07	10692	1.57165	10692	5.42797e-09	10692	7.53401e-07
10693	0.0595315	10693	4.68323e-07	10693	0.299607	10693	1.76716e-08	10693	4.96246e-07
10694	0.0607553	10694	6.60625e-07	10694	0.075352	10694	7.25238e-08	10694	3.73618e-07
10695	0.0785826	10695	1.33487e-06	10695	0.0272543	10695	3.42903e-07	10695	2.78112e-07
10696	0.112468	10696	3.33134e-06	10696	0.0145214	10696	1.66166e-06	10696	4.61482e-07
10697	0.156844	10697	8.62131e-06	10697	0.0109559	10697	7.42754e-06	10697	1.21403e-06
10698	0.189628	10698	1.89242e-05	10698	0.0106264	10698	2.84006e-05	10698	5.85766e-06
10699	0.178439	10699	2.8833e-05	10699	0.0116938	10699	8.88143e-05	10699	1.30109e-05
10700	0.119872	10700	2.62456e-05	10700	0.0131276	10700	0.000222095	10700	2.99961e-05
10701	0.0554349	10701	1.356e-05	10701	0.0144035	10701	0.000439749	10701	4.95912e-05
10702	0.018491	10702	4.26437e-06	10702	0.0160928	10702	0.000684871	10702	4.70337e-05
10703	0.00515427	10703	9.74124e-07	10703	0.0204171	10703	0.000829267	10703	2.75192e-05
10704	0.00150771	10704	2.04224e-07	10704	0.0334048	10704	0.00076373	10704	2.58162e-05
10705	0.000588041	10705	4.88616e-08	10705	0.0764379	10705	0.000518635	10705	3.10973e-05
10706	0.0003556	10706	1.52029e-08	10706	0.241275	10706	0.000252018	10706	1.62713e-05
10707	0.000328457	10707	6.20669e-09	10707	0.936551	10707	8.67523e-05	10707	9.2629e-06
10708	0.000388628	10708	3.05815e-09	10708	3.7522	10708	2.18779e-05	10708	6.21331e-06
10709	0.000462706	10709	1.66402e-09	10709	13.0813	10709	4.45585e-06	10709	8.16548e-06
10710	0.000464809	10710	1.00767e-09	10710	35.489	10710	8.63969e-07	10710	4.20688e-06
10711	0.000385754	10711	7.94586e-10	10711	72.4761	10711	1.95349e-07	10711	1.14364e-06
10712	0.000302926	10712	1.05737e-09	10712	114.385	10712	6.14795e-08	10712	4.00059e-07
10713	0.000275943	10713	2.95007e-09	10713	145.783	10713	2.89915e-08	10713	4.38037e-07
10714	0.00033571	10714	1.75428e-08	10714	153.721	10714	1.90196e-08	10714	1.20456e-06
10715	0.000538345	10715	1.7541e-07	10715	133.393	10715	1.42373e-08	10715	1.4823e-05
10716	0.000970231	10716	1.98048e-06	10716	94.0119	10716	9.58264e-09	10716	0.000148091
10717	0.00158821	10717	1.69261e-05	10717	54.5721	10717	4.84468e-09	10717	0.00067458
10718	0.00201315	10718	8.26999e-05	10718	27.7852	10718	1.74251e-09	10718	0.00254229
10719	0.00188351	10719	0.000204648	10719	13.7491	10719	4.85861e-10	10719	0.00488805
10720	0.00137504	10720	0.000260811	10720	7.34606	10720	1.2682e-10	10720	0.00554799
10721	0.00087224	10721	0.00019096	10721	4.52613	10721	3.8476e-11	10721	0.00298312
10722	0.000534738	10722	9.47365e-05	10722	3.24266	10722	1.59353e-11	10722	0.0016069
10723	0.0003455	10723	3.91829e-05	10723	2.62522	10723	9.50437e-12	10723	0.000541491
10724	0.000257666	10724	1.74229e-05	10724	2.35613	10724	7.799e-12	10724	0.000271295
10725	0.000253374	10725	1.1201e-05	10725	2.41441	10725	8.06639e-12	10725	0.000245619
10726	0.000392216	10726	1.38807e-05	10726	3.05444	10726	9.82403e-12	10726	0.000291409
10727	0.00111635	10727	3.9367e-05	10727	5.15303	10727	1.3726e-11	10727	0.000371877
10728	0.00596969	10728	0.00024039	10728	11.592	10728	2.17457e-11	10728	0.00168029
10729	0.0494745	10729	0.00226328	10729	30.4765	10729	3.71565e-11	10729	0.0187466
10730	0.43297	10730	0.0193829	10730	72.5171	10730	6.04894e-11	10730	0.278264
10731	2.54506	10731	0.0854003	10731	114.642	10731	7.78723e-11	10731	2.34429
10732	6.95111	10732	0.121	10732	92.3041	10732	6.53979e-11	10732	4.71836
10733	7.46171	10733	0.0417607	10733	32.954	10733	3.16035e-11	10733	4.56117
10734	3.44342	10734	0.00340224	10734	5.43942	10734	8.80648e-12	10734	0.840071
10735	0.95587	10735	8.49115e-05	10735	0.528058	10735	1.65958e-12	10735	0.0360128
10736	0.26284	10736	1.18002e-06	10736	0.0457821	10736	2.86756e-13	10736	0.000987941
10737	0.119148	10737	2.31302e-08	10737	0.00594294	10737	6.67673e-14	10737	2.63312e-05
10738	0.125098	10738	1.90108e-09	10738	0.00185618	10738	2.97877e-14	10738	1.03408e-06
10739	0.318385	10739	1.51285e-09	10739	0.00181847	10739	3.09205e-14	10739	3.37045e-07
10740	1.53632	10740	1.33067e-08	10740	0.00532873	10740	7.24008e-14	10740	9.81211e-07
10741	9.31497	10741	6.71691e-07	10741	0.0335484	10741	3.06545e-13	10741	3.81828e-05
10742	46.8304	10742	6.63609e-05	10742	0.281521	10742	1.73665e-12	10742	0.00231158
10743	143.791	10743	0.00455106	10743	1.97118	10743	1.00909e-11	10743	0.105307
10744	231.803	10744	0.103037	10744	8.10015	10744	5.11429e-11	10744	3.95356
10745	195.699	10745	0.514932	10745	16.1496	10745	2.15657e-10	10745	24.7661
10746	96.7673	10746	0.510963	10746	15.1352	10746	7.83972e-10	10746	31.5324
10747	33.3823	10747	0.115144	10747	7.32143	10747	2.62318e-09	10747	13.0218
10748	9.61129	10748	0.00819879	10748	2.16703	10748	8.44294e-09	10748	2.4849
10749	2.64346	10749	0.000300781	10749	0.479465	10749	2.59334e-08	10749	0.208672
10750	0.74898	10750	1.0354e-05	10750	0.0972582	10750	7.15627e-08	10750	0.020168
10751	0.228018	10751	6.27332e-07	10751	0.0222454	10751	1.62346e-07	10751	0.00191132
10752	0.0788761	10752	1.13759e-07	10752	0.00710129	10752	2.78065e-07	10752	0.000586243
10753	0.0341503	10753	8.17458e-08	10753	0.00383689	10753	3.39333e-07	10753	0.000466925
10754	0.0207415	10754	2.16813e-07	10754	0.0038864	10754	2.89131e-07	10754	0.000528163
10755	0.0188749	10755	1.43061e-06	10755	0.00692716	10755	1.75907e-07	10755	0.00213103
10756	0.0246764	10756	1.3332e-05	10756	0.0170789	10756	8.21699e-08	10756	0.0113434
10757	0.039759	10757	0.00010075	10757	0.0415106	10757	3.35653e-08	10757	0.105145
10758	0.0643803	10758	0.000408475	10758	0.0730589	10758	1.43569e-08	10758	0.465676
10759	0.0883344	10759	0.000717392	10759	0.0783123	10759	7.80908e-09	10759	0.913456
10760	0.0947244	10760	0.000540016	10760	0.0510523	10760	6.26414e-09	10760	1.42116
10761	0.0804832	10761	0.000205676	10761	0.0230922	10761	7.75154e-09	10761	1.05656
10762	0.0581162	10762	5.315e-05	10762	0.0086342	10762	1.36756e-08	10762	0.362818
10763	0.0383716	10763	1.31834e-05	10763	0.0030102	10763	2.88619e-08	10763	0.110931
10764	0.0240345	10764	4.25475e-06	10764	0.000988266	10764	5.87389e-08	10764	0.0230959
10765	0.014147	10765	2.11359e-06	10765	0.000280616	10765	9.45781e-08	10765	0.00397806
10766	0.00752189	10766	1.59337e-06	10766	6.20059e-05	10766	1.0491e-07	10766	0.000958412
10767	0.0034632	10767	1.54718e-06	10767	1.02615e-05	10767	7.59555e-08	10767	0.000163303
10768	0.00135224	10768	1.55393e-06	10768	1.38461e-06	10768	3.74341e-08	10768	2.49798e-05
10769	0.000454079	10769	1.3577e-06	10769	1.87463e-07	10769	1.43849e-08	10769	8.69367e-06
10770	0.000137821	10770	9.60845e-07	10770	3.34304e-08	10770	5.29426e-09	10770	4.83054e-06
10771	4.07166e-05	10771	5.60854e-07	10771	9.99986e-09	10771	2.33226e-09	10771	2.73151e-06
10772	1.26541e-05	10772	2.82031e-07	10772	5.66409e-09	10772	1.4521e-09	10772	4.64418e-06
10773	4.39481e-06	10773	1.21975e-07	10773	5.85081e-09	10773	1.33863e-09	10773	1.02032e-05
10774	1.76729e-06	10774	4.22875e-08	10774	9.37163e-09	10774	1.68039e-09	10774	2.63599e-05
10775	8.42768e-07	10775	1.07569e-08	10775	1.90035e-08	10775	2.45292e-09	10775	4.25492e-05
10776	4.94837e-07	10776	2.00094e-09	10776	4.16527e-08	10776	3.61668e-09	10776	4.54837e-05
10777	3.81517e-07	10777	3.25574e-10	10777	9.23182e-08	10777	5.1176e-09	10777	2.69463e-05
10778	4.14166e-07	10778	6.80911e-11	10778	2.10403e-07	10778	7.33673e-09	10778	1.60497e-05
10779	6.47302e-07	10779	2.98601e-11	10779	5.18146e-07	10779	1.19378e-08	10779	1.03259e-05
10780	1.34987e-06	10780	4.02474e-11	10780	1.40866e-06	10780	2.41927e-08	10780	8.83679e-06
10781	3.1364e-06	10781	1.79384e-10	10781	4.06049e-06	10781	6.13934e-08	10781	1.90428e-05
10782	6.44085e-06	10782	2.00547e-09	10782	1.13224e-05	10782	1.76697e-07	10782	8.81106e-05
10783	9.5914e-06	10783	3.48026e-08	10783	2.75376e-05	10783	4.86816e-07	10783	0.00035902
10784	9.45362e-06	10784	5.78463e-07	10784	5.39709e-05	10784	1.06513e-06	10784	0.00105007
10785	6.44825e-06	10785	6.42183e-06	10785	8.16336e-05	10785	1.57377e-06	10785	0.00294726
10786	3.56376e-06	10786	3.84485e-05	10786	9.36853e-05	10786	1.40056e-06	10786	0.00592372
10787	1.96428e-06	10787	0.000112326	10787	8.1396e-05	10787	7.12868e-07	10787	0.00473266
10788	1.29383e-06	10788	0.00015594	10788	5.4433e-05	10788	2.13627e-07	10788	0.00211617
10789	1.12263e-06	10789	0.000105689	10789	2.96215e-05	10789	4.28963e-08	10789	0.000502378
10790	1.28494e-06	10790	3.80631e-05	10790	1.47055e-05	10790	7.29502e-09	10790	9.43156e-05
10791	1.81742e-06	10791	8.54072e-06	10791	7.87703e-06	10791	1.42608e-09	10791	1.67421e-05
10792	2.91217e-06	10792	1.52003e-06	10792	5.43159e-06	10792	4.30095e-10	10792	4.3198e-06
10793	4.89509e-06	10793	2.9004e-07	10793	5.39805e-06	10793	2.38612e-10	10793	2.39746e-06
10794	8.10898e-06	10794	8.00325e-08	10794	7.65854e-06	10794	2.39498e-10	10794	4.48685e-06
10795	1.24404e-05	10795	3.94665e-08	10795	1.34902e-05	10795	3.55698e-10	10795	1.74612e-05
10796	1.64117e-05	10796	3.68778e-08	10796	2.3554e-05	10796	5.79733e-10	10796	7.87684e-05
10797	1.71933e-05	10797	5.91757e-08	10797	3.19937e-05	10797	7.8139e-10	10797	0.000385508
10798	1.34948e-05	10798	1.34693e-07	10798	2.79197e-05	10798	7.28936e-10	10798	0.00122749
10799	7.90723e-06	10799	3.60451e-07	10799	1.44104e-05	10799	4.56197e-10	10799	0.0026159
10800	3.71331e-06	10800	1.02103e-06	10800	4.70573e-06	10800	2.14417e-10	10800	0.0066743
10801	1.60286e-06	10801	3.07615e-06	10801	1.22162e-06	10801	9.40623e-11	10801	0.00949479
10802	7.48085e-07	10802	1.06459e-05	10802	3.5645e-07	10802	4.95305e-11	10802	0.0101295
10803	4.28344e-07	10803	4.50249e-05	10803	1.66611e-07	10803	3.80782e-11	10803	0.00512238
10804	3.11487e-07	10804	0.00022296	10804	1.55172e-07	10804	4.53491e-11	10804	0.00450901
10805	2.66675e-07	10805	0.00108059	10805	2.84268e-07	10805	7.51089e-11	10805	0.0117419
10806	2.31024e-07	10806	0.00394688	10806	8.22441e-07	10806	1.37161e-10	10806	0.0365994
10807	1.73778e-07	10807	0.00861302	10807	2.78198e-06	10807	2.13121e-10	10807	0.0647236
10808	1.05041e-07	10808	0.0102161	10808	8.60945e-06	10808	2.34624e-10	10808	0.146174
10809	5.33336e-08	10809	0.00727424	10809	2.16372e-05	10809	1.75902e-10	10809	0.241077
10810	2.67937e-08	10810	0.00407652	10810	4.38289e-05	10810	1.01009e-10	10810	0.234833
10811	1.67696e-08	10811	0.00252164	10811	7.40363e-05	10811	5.62221e-11	10811	0.182921
10812	1.60745e-08	10812	0.00222474	10812	0.000104481	10812	3.98792e-11	10812	0.265413
10813	2.58453e-08	10813	0.00298142	10813	0.000116245	10813	4.48216e-11	10813	0.853555
10814	6.56844e-08	10814	0.00533524	10814	9.43072e-05	10814	8.78832e-11	10814	5.2686
10815	2.2468e-07	10815	0.0102895	10815	5.50085e-05	10815	2.92427e-10	10815	8.80506
10816	8.70904e-07	10816	0.0180164	10816	2.61575e-05	10816	1.49548e-09	10816	24.2184
10817	3.39299e-06	10817	0.0270256	10817	1.33788e-05	10817	1.04439e-08	10817	115.745
10818	1.24446e-05	10818	0.0361943	10818	1.03878e-05	10818	8.75266e-08	10818	56.038
10819	4.05056e-05	10819	0.0462067	10819	1.57694e-05	10819	7.43257e-07	10819	17.5529
10820	0.000104667	10820	0.0565919	10820	4.75281e-05	10820	5.07419e-06	10820	5.22248
10821	0.000177828	10821	0.0606954	10821	0.000220363	10821	2.11682e-05	10821	3.1906
10822	0.000156971	10822	0.0484637	10822	0.00102712	10822	4.16975e-05	10822	1.47999
10823	5.83265e-05	10823	0.0244476	10823	0.00309475	10823	3.27351e-05	10823	0.4413
10824	8.24641e-06	10824	0.00707719	10824	0.00429297	10824	9.99536e-06	10824	0.143191
10825	4.81669e-07	10825	0.00119147	10825	0.00227989	10825	1.37717e-06	10825	0.0326518
10826	1.59376e-08	10826	0.000132938	10826	0.000454287	10826	1.17339e-07	10826	0.00895161
10827	5.20817e-10	10827	1.24123e-05	10827	3.91953e-05	10827	9.58189e-09	10827	0.00322396
10828	3.45091e-11	10828	1.32269e-06	10828	1.99985e-06	10828	1.21499e-09	10828	0.00317552
10829	9.20316e-12	10829	2.28285e-07	10829	9.71159e-08	10829	3.67027e-10	10829	0.00212875
10830	1.44172e-11	10830	8.82283e-08	10830	8.02109e-09	10830	3.50142e-10	10830	0.00214536
10831	1.18203e-10	10831	9.28271e-08	10831	1.90704e-09	10831	1.14081e-09	10831	0.00203405
10832	2.90595e-09	10832	2.5631e-07	10832	1.67063e-09	10832	1.11002e-08	10832	0.00442043
10833	1.00931e-07	10833	1.37935e-06	10833	4.51496e-09	10833	2.37743e-07	10833	0.0210534
10834	2.4936e-06	10834	9.0411e-06	10834	2.20855e-08	10834	7.55681e-06	10834	0.180788
10835	2.76298e-05	10835	4.46348e-05	10835	1.02233e-07	10835	0.00024211	10835	0.277802
10836	0.000113748	10836	0.000117778	10836	2.66092e-07	10836	0.00578063	10836	0.195357
10837	0.000184403	10837	0.000145934	10837	3.00137e-07	10837	0.0856515	10837	0.0794283
10838	0.000147901	10838	9.17947e-05	10838	1.48705e-07	10838	0.72972	10838	0.0285993
10839	7.82869e-05	10839	3.63455e-05	10839	4.03517e-08	10839	3.53372	10839	0.00905057
10840	3.45074e-05	10840	1.162e-05	10840	8.23554e-09	10840	9.80239	10840	0.00357574
10841	1.40649e-05	10841	3.63502e-06	10841	1.70276e-09	10841	15.5899	10841	0.00331375
10842	5.2358e-06	10842	1.23054e-06	10842	4.36095e-10	10842	14.1595	10842	0.0034793
10843	1.7066e-06	10843	4.71722e-07	10843	1.52283e-10	10843	7.44763	10843	0.00201354
10844	5.07359e-07	10844	2.18706e-07	10844	7.55421e-11	10844	2.40711	10844	0.00139123
10845	1.67904e-07	10845	1.41803e-07	10845	5.58046e-11	10845	0.539645	10845	0.00173328
10846	8.74485e-08	10846	1.5967e-07	10846	6.61118e-11	10846	0.100367	10846	0.00321686
10847	1.04061e-07	10847	3.80137e-07	10847	1.3365e-10	10847	0.0190584	10847	0.00716418
10848	3.47245e-07	10848	1.99955e-06	10848	4.494e-10	10848	0.00443936	10848	0.0381746
10849	2.88284e-06	10849	1.91036e-05	10849	2.11447e-09	10849	0.00139799	10849	0.236033
10850	3.81231e-05	10850	0.000219403	10850	1.01279e-08	10850	0.000575083	10850	3.32865
10851	0.000433022	10851	0.00181278	10851	3.32602e-08	10851	0.000261997	10851	63.4252
10852	0.00234226	10852	0.00671405	10852	5.15983e-08	10852	0.000103907	10852	285.789
10853	0.00397024	10853	0.00808205	10853	2.91979e-08	10853	2.86069e-05	10853	193.507
10854	0.0017587	10854	0.00284683	10854	5.54486e-09	10854	4.84847e-06	10854	56.0015
10855	0.000218022	10855	0.000336142	10855	3.97957e-10	10855	5.32862e-07	10855	4.05678
10856	1.0233e-05	10856	1.91113e-05	10856	1.47247e-11	10856	4.84583e-08	10856	0.125404
10857	2.9703e-07	10857	8.82695e-07	10857	4.39464e-13	10857	5.3974e-09	10857	0.00181563
10858	9.63195e-09	10858	5.78712e-08	10858	1.71874e-14	10858	1.13054e-09	10858	2.75533e-05
10859	6.11738e-10	10859	8.32498e-09	10859	1.32014e-15	10859	6.11538e-10	10859	1.06463e-06
10860	1.12953e-10	10860	3.21874e-09	10860	2.52811e-16	10860	9.39491e-10	10860	1.78096e-07
10861	7.03735e-11	10861	3.27532e-09	10861	1.28177e-16	10861	3.5797e-09	10861	6.70093e-08
10862	1.3575e-10	10862	7.64381e-09	10862	1.60336e-16	10862	2.55499e-08	10862	7.34477e-08
10863	6.32389e-10	10863	3.53811e-08	10863	4.28448e-16	10863	2.49096e-07	10863	4.13761e-07
10864	5.1067e-09	10864	2.89466e-07	10864	2.02472e-15	10864	2.51502e-06	10864	3.38241e-06
10865	5.01329e-08	10865	3.73438e-06	10865	1.34994e-14	10865	2.12812e-05	10865	5.45653e-05
10866	4.29475e-07	10866	6.49259e-05	10866	9.91693e-14	10866	0.00013028	10866	0.00105184
10867	2.45891e-06	10867	0.00122678	10867	6.35484e-13	10867	0.000528264	10867	0.00955008
10868	7.95779e-06	10868	0.0196368	10868	2.97345e-12	10868	0.00137255	10868	0.0369052
10869	1.38815e-05	10869	0.210376	10869	9.30073e-12	10869	0.00232673	10869	0.0988309
10870	1.40658e-05	10870	1.2689	10870	1.98338e-11	10870	0.00273565	10870	0.131758
10871	9.88472e-06	10871	4.00043	10871	3.27266e-11	10871	0.00244662	10871	0.119036
10872	6.07972e-06	10872	6.85292	10872	5.12928e-11	10872	0.00186072	10872	0.0288371
10873	4.06134e-06	10873	7.33208	10873	9.51609e-11	10873	0.00135977	10873	0.00758359
10874	3.33108e-06	10874	5.97642	10874	2.42183e-10	10874	0.00108417	10874	0.00325222
10875	3.31242e-06	10875	4.51773	10875	8.47564e-10	10875	0.00106568	10875	0.00103402
10876	3.52232e-06	10876	3.62589	10876	3.50085e-09	10876	0.00142283	10876	0.000730701
10877	3.41941e-06	10877	3.22977	10877	1.33728e-08	10877	0.00269454	10877	0.000616279
10878	2.75952e-06	10878	3.09117	10878	3.74537e-08	10878	0.00700777	10878	0.00053863
10879	1.91979e-06	10879	2.98615	10879	6.7407e-08	10879	0.0224717	10879	0.000322913
10880	1.36001e-06	10880	2.79092	10880	7.85664e-08	10880	0.0758357	10880	0.000314737
10881	1.2245e-06	10881	2.53648	10881	6.75295e-08	10881	0.226806	10881	0.0007059
10882	1.63011e-06	10882	2.34376	10882	5.16689e-08	10882	0.51684	10882	0.0012613
10883	3.11054e-06	10883	2.30901	10883	4.14034e-08	10883	0.806472	10883	0.00241275
10884	6.68232e-06	10884	2.43981	10884	3.72202e-08	10884	0.819247	10884	0.0109804
10885	1.10877e-05	10885	2.59357	10885	3.58521e-08	10885	0.546147	10885	0.0349518
10886	9.71699e-06	10886	2.43212	10886	3.25376e-08	10886	0.25391	10886	0.0554162
10887	3.4717e-06	10887	1.70433	10887	2.39792e-08	10887	0.0912508	10887	0.0144017
10888	4.77621e-07	10888	0.768451	10888	1.29134e-08	10888	0.0289754	10888	0.000858293
10889	3.0212e-08	10889	0.206121	10889	4.98918e-09	10889	0.00947974	10889	2.56145e-05
10890	1.30757e-09	10890	0.0342755	10890	1.50609e-09	10890	0.00374156	10890	9.87058e-07
10891	6.69516e-11	10891	0.00428198	10891	4.21899e-10	10891	0.00202934	10891	6.35183e-08
10892	7.12391e-12	10892	0.000564414	10892	1.34834e-10	10892	0.00159869	10892	9.60232e-09
10893	2.36979e-12	10893	0.000120254	10893	5.82344e-11	10893	0.00172481	10893	2.61009e-08
10894	2.80194e-12	10894	6.10384e-05	10894	3.66686e-11	10894	0.00214997	10894	2.84625e-07
10895	1.00939e-11	10895	8.96701e-05	10895	3.26389e-11	10895	0.00247597	10895	1.16561e-05
10896	7.98238e-11	10896	0.000345432	10896	3.68395e-11	10896	0.00218358	10896	0.000660532
10897	9.55035e-10	10897	0.00241548	10897	4.5899e-11	10897	0.00137348	10897	0.0216197
10898	1.22828e-08	10898	0.0185148	10898	5.53742e-11	10898	0.000668826	10898	0.351916
10899	1.25763e-07	10899	0.0956915	10899	5.76942e-11	10899	0.000309914	10899	2.0132
10900	7.77117e-07	10900	0.232561	10900	4.62923e-11	10900	0.000173443	10900	4.79655
10901	2.22962e-06	10901	0.219966	10901	2.50032e-11	10901	0.000136376	10901	5.28257
10902	2.36492e-06	10902	0.0799437	10902	7.80964e-12	10902	0.000148126	10902	3.48673
10903	7.98864e-07	10903	0.0129765	10903	1.2354e-12	10903	0.000186479	10903	1.21891
10904	8.48489e-08	10904	0.00126135	10904	9.42439e-14	10904	0.000214	10904	0.136902
10905	3.40388e-09	10905	0.000110425	10905	3.87886e-15	10905	0.000186479	10905	0.00880466
10906	7.90619e-11	10906	1.40251e-05	10906	1.21605e-16	10906	0.00011948	10906	0.000646547
10907	2.07891e-12	10907	4.10951e-06	10907	5.32685e-18	10907	6.53621e-05	10907	5.9817e-05
10908	1.37911e-13	10908	3.86401e-06	10908	7.15076e-19	10908	4.07759e-05	10908	1.46863e-05
10909	4.50419e-14	10909	1.25628e-05	10909	5.969e-19	10909	4.00753e-05	10909	1.66667e-05
10910	9.05517e-14	10910	0.000112662	10910	4.09003e-18	10910	7.76827e-05	10910	7.79393e-05
10911	7.94857e-13	10911	0.00177799	10911	1.63882e-16	10911	0.00030589	10911	0.00146178
10912	1.48074e-11	10912	0.0295018	10912	1.72494e-14	10912	0.00204917	10912	0.0383032
10913	2.72256e-10	10913	0.333497	10913	1.91866e-12	10913	0.017093	10913	0.852603
10914	2.80707e-09	10914	1.94721	10914	1.07203e-10	10914	0.126229	10914	9.91807
10915	1.21938e-08	10915	5.22355	10915	1.87316e-09	10915	0.620451	10915	49.5369
10916	2.14207e-08	10916	6.44985	10916	8.22982e-09	10916	1.68352	10916	125.805
10917	1.72303e-08	10917	3.93574	10917	8.98821e-09	10917	2.33446	10917	240.221
10918	7.82704e-09	10918	1.32332	10918	2.85354e-09	10918	1.71119	10918	258.982
10919	2.55086e-09	10919	0.283347	10919	3.57686e-10	10919	0.765725	10919	129.842
10920	7.59364e-10	10920	0.0470593	10920	2.7535e-11	10920	0.266359	10920	54.0035
10921	2.59275e-10	10921	0.00782159	10921	2.21923e-12	10921	0.0967394	10921	13.0458
10922	1.21885e-10	10922	0.00171196	10922	3.15397e-13	10922	0.04767	10922	2.9444
10923	8.58529e-11	10923	0.000608599	10923	1.13275e-13	10923	0.036179	10923	1.15148
10924	8.54135e-11	10924	0.000370914	10924	1.11651e-13	10924	0.0396288	10924	0.60565
10925	9.8426e-11	10925	0.000338387	10925	2.49242e-13	10925	0.05024	10925	1.17475
10926	1.00107e-10	10926	0.000352871	10926	8.9015e-13	10926	0.0566201	10926	2.01415
10927	7.00418e-11	10927	0.000314752	10927	3.56064e-12	10927	0.0472158	10927	0.695467
10928	2.91404e-11	10928	0.000196114	10928	1.21261e-11	10928	0.028317	10928	0.15246
10929	7.19313e-12	10929	8.05456e-05	10929	2.96565e-11	10929	0.0138934	10929	0.0344088
10930	1.21213e-12	10930	2.38129e-05	10930	4.80619e-11	10930	0.00697845	10930	0.00385655
10931	1.79598e-13	10931	6.17285e-06	10931	5.14642e-11	10931	0.00448822	10931	0.000507686
10932	3.21643e-14	10932	1.80196e-06	10932	3.93938e-11	10932	0.00424069	10932	8.81202e-05
10933	9.59805e-15	10933	7.53654e-07	10933	2.54901e-11	10933	0.00596899	10933	1.86807e-05
10934	6.11195e-15	10934	5.35865e-07	10934	1.76875e-11	10934	0.011431	10934	6.63735e-06
10935	9.12501e-15	10935	6.81968e-07	10935	1.67661e-11	10935	0.0256926	10935	5.3998e-06
10936	2.85328e-14	10936	1.41171e-06	10936	2.50632e-11	10936	0.0574848	10936	1.45074e-05
10937	1.36698e-13	10937	3.75873e-06	10937	5.66536e-11	10937	0.108533	10937	9.44261e-05
10938	6.49871e-13	10938	9.31268e-06	10938	1.52488e-10	10938	0.146598	10938	0.000521163
10939	1.98302e-12	10939	1.54249e-05	10939	3.42718e-10	10939	0.120674	10939	0.00181291
10940	2.82654e-12	10940	1.33355e-05	10940	4.56961e-10	10940	0.0529981	10940	0.0025384
10941	1.68283e-12	10941	5.50624e-06	10941	2.91784e-10	10941	0.011644	10941	0.00132789
10942	4.81289e-13	10942	1.21905e-06	10942	8.73581e-11	10942	0.0013495	10942	0.000140294
10943	9.71126e-14	10943	2.00302e-07	10943	1.4738e-11	10943	0.000101706	10943	5.74081e-06
10944	2.38843e-14	10944	3.95155e-08	10944	1.99088e-12	10944	7.21878e-06	10944	2.06418e-07
10945	1.22628e-14	10945	1.55838e-08	10945	3.31604e-13	10945	7.75406e-07	10945	1.12196e-08
10946	1.79972e-14	10946	1.75809e-08	10946	1.0016e-13	10946	1.9682e-07	10946	1.61391e-09
10947	7.19136e-14	10947	6.01884e-08	10947	6.82129e-14	10947	1.50957e-07	10947	1.19726e-09
10948	5.37791e-13	10948	4.81974e-07	10948	1.03869e-13	10948	3.27387e-07	10948	5.37167e-09
10949	4.47467e-12	10949	5.66827e-06	10949	2.87141e-13	10949	1.41409e-06	10949	1.3533e-07
10950	2.59434e-11	10950	5.9062e-05	10950	1.04168e-12	10950	7.47973e-06	10950	3.40509e-06
10951	7.79916e-11	10951	0.000360534	10951	3.52379e-12	10951	3.07584e-05	10951	6.35696e-05
10952	1.11021e-10	10952	0.00100041	10952	8.45299e-12	10952	7.16675e-05	10952	0.000624993
10953	8.17657e-11	10953	0.00116911	10953	1.24158e-11	10953	8.15406e-05	10953	0.00323177
10954	3.86001e-11	10954	0.000630807	10954	1.13259e-11	10954	4.53165e-05	10954	0.00726523
10955	1.54181e-11	10955	0.00019986	10955	7.7261e-12	10955	1.3818e-05	10955	0.00499967
10956	6.91141e-12	10956	5.31773e-05	10956	5.50939e-12	10956	2.83615e-06	10956	0.00188912
10957	4.4149e-12	10957	1.80251e-05	10957	6.19139e-12	10957	5.13848e-07	10957	0.000338224
10958	4.70654e-12	10958	1.13298e-05	10958	1.56473e-11	10958	1.1184e-07	10958	4.56909e-05
10959	8.82232e-12	10959	1.62867e-05	10959	1.03768e-10	10959	3.92345e-08	10959	9.43942e-06
10960	2.73791e-11	10960	5.13473e-05	10960	1.58982e-09	10960	2.74393e-08	10960	2.81385e-06
10961	1.20495e-10	10961	0.000268694	10961	3.89038e-08	10961	4.13725e-08	10961	3.20159e-06
10962	6.09353e-10	10962	0.0015581	10962	9.39572e-07	10962	1.26007e-07	10962	1.29677e-05
10963	2.84556e-09	10963	0.00678616	10963	1.41849e-05	10963	6.52389e-07	10963	4.02497e-05
10964	1.02027e-08	10964	0.0169711	10964	9.48261e-05	10964	4.5897e-06	10964	0.000161488
10965	2.49644e-08	10965	0.0221073	10965	0.000229798	10965	3.5033e-05	10965	0.000702409
10966	4.05504e-08	10966	0.0162611	10966	0.000191354	10966	0.000239749	10966	0.00113771
10967	4.70934e-08	10967	0.00852198	10967	5.95389e-05	10967	0.00128373	10967	0.00109148
10968	4.60764e-08	10968	0.00438993	10968	8.4985e-06	10968	0.00497387	10968	0.00133371
10969	4.66612e-08	10969	0.00302693	10969	7.47606e-07	10969	0.0134835	10969	0.000607134
10970	5.78004e-08	10970	0.00333302	10970	5.63103e-08	10970	0.0252629	10970	0.000296647
10971	9.19543e-08	10971	0.00566285	10971	4.8312e-09	10971	0.0324989	10971	0.000214412
10972	1.70295e-07	10972	0.0117911	10972	5.61074e-10	10972	0.0288659	10972	0.000114132
10973	3.00985e-07	10973	0.0218067	10973	9.13316e-11	10973	0.01856	10973	4.51459e-05
10974	4.14644e-07	10974	0.0271134	10974	1.94815e-11	10974	0.00977477	10974	1.68156e-05
10975	3.9823e-07	10975	0.0199095	10975	4.94994e-12	10975	0.0052105	10975	4.14982e-06
10976	2.75731e-07	10976	0.00924968	10976	1.42347e-12	10976	0.00367398	10976	1.0772e-06
10977	1.64916e-07	10977	0.00351966	10977	4.79055e-13	10977	0.00439804	10977	5.58526e-07
10978	1.12942e-07	10978	0.00160469	10978	2.12057e-13	10978	0.0103482	10978	3.33988e-07
10979	1.19322e-07	10979	0.00128441	10979	1.45216e-13	10979	0.0474906	10979	2.04349e-07
10980	2.40467e-07	10980	0.00229297	10980	1.78013e-13	10980	0.3645	10980	4.75972e-07
10981	9.65905e-07	10981	0.00906887	10981	4.16945e-13	10981	3.66401	10981	4.70704e-06
10982	6.65842e-06	10982	0.0615052	10982	1.7635e-12	10982	36.907	10982	0.00010019
10983	5.83908e-05	10983	0.473646	10983	1.12896e-11	10983	292.743	10983	0.00346137
10984	0.000453975	10984	2.66257	10984	8.4843e-11	10984	1510.72	10984	0.167895
10985	0.00224981	10985	7.5192	10985	5.7191e-10	10985	4421.99	10985	5.36821
10986	0.00565795	10986	8.27243	10986	2.76155e-09	10986	6724.43	10986	61.2154
10987	0.00663589	10987	3.16392	10987	8.3259e-09	10987	5098.88	10987	106.208
10988	0.00391362	10988	0.437799	10988	1.53207e-08	10988	1948.05	10988	55.0538
10989	0.00145823	10989	0.027071	10989	1.91221e-08	10989	404.463	10989	7.64729
10990	0.000485382	10990	0.00111276	10990	2.03592e-08	10990	53.5418	10990	0.159759
10991	0.000213648	10991	5.34661e-05	10991	2.52915e-08	10991	5.83138	10991	0.00297591
10992	0.000172669	10992	5.65614e-06	10992	4.97756e-08	10992	0.727812	10992	6.21262e-05
10993	0.000296924	10993	2.18648e-06	10993	1.84049e-07	10993	0.146311	10993	3.19961e-06
10994	0.00098598	10994	3.64825e-06	10994	1.19879e-06	10994	0.0604661	10994	1.0987e-06
10995	0.00465959	10995	2.04726e-05	10995	1.0237e-05	10995	0.0544011	10995	2.88182e-06
10996	0.0211639	10996	0.00022738	10996	7.5991e-05	10996	0.0924804	10996	1.75491e-05
10997	0.0656948	10997	0.00282936	10997	0.000338141	10997	0.228	10997	0.000213385
10998	0.11475	10998	0.0258615	10998	0.000723727	10998	0.616781	10998	0.00367322
10999	0.110401	10999	0.13986	10999	0.00071921	10999	1.47157	10999	0.0195959
11000	0.0656582	11000	0.424372	11000	0.000370739	11000	2.6874	11000	0.0695461
11001	0.0287922	11001	0.740374	11001	0.000118183	11001	3.43943	11001	0.223994
11002	0.01089	11002	0.763809	11002	2.73156e-05	11002	2.90337	11002	0.330244
11003	0.00388614	11003	0.46872	11003	5.07238e-06	11003	1.56126	11003	0.270651
11004	0.00134318	11004	0.173546	11004	8.08251e-07	11004	0.543923	11004	0.181727
11005	0.000449679	11005	0.0421894	11005	1.20074e-07	11005	0.135936	11005	0.0527118
11006	0.00014677	11006	0.00826355	11006	1.90745e-08	11006	0.0297282	11006	0.00874745
11007	4.73947e-05	11007	0.00179656	11007	3.85319e-09	11007	0.00742037	11007	0.000882199
11008	1.51783e-05	11008	0.000620851	11008	1.144e-09	11008	0.0027585	11008	0.000101181
11009	4.7181e-06	11009	0.00044791	11009	5.27402e-10	11009	0.00185609	11009	2.70476e-05
11010	1.3878e-06	11010	0.00072938	11010	3.61456e-10	11010	0.00245847	11010	1.56185e-05
11011	3.90943e-07	11011	0.00232087	11011	3.33621e-10	11011	0.0062412	11011	9.47903e-06
11012	1.13815e-07	11012	0.0106192	11012	3.72777e-10	11012	0.0269529	11012	1.91464e-05
11013	3.86707e-08	11013	0.0482775	11013	4.54377e-10	11013	0.162587	11013	6.95152e-05
11014	1.70628e-08	11014	0.154579	11014	5.34434e-10	11014	1.05817	11014	0.000209367
11015	1.01037e-08	11015	0.269179	11015	5.22474e-10	11015	5.59659	11015	0.00065448
11016	7.63269e-09	11016	0.222882	11016	3.70725e-10	11016	18.6976	11016	0.00155948
11017	6.74857e-09	11017	0.0888987	11017	1.83382e-10	11017	33.5067	11017	0.0011154
11018	6.58525e-09	11018	0.0200863	11018	7.21573e-11	11018	30.8736	11018	0.000249241
11019	7.05149e-09	11019	0.00339419	11019	3.10963e-11	11019	15.7909	11019	3.74525e-05
11020	8.45301e-09	11020	0.000590638	11020	2.24352e-11	11020	5.28697	11020	6.80119e-06
11021	1.13072e-08	11021	0.000138513	11021	3.88947e-11	11021	1.43463	11021	3.42439e-06
11022	1.60765e-08	11022	5.09685e-05	11022	1.85327e-10	11022	0.398104	11022	1.29887e-06
11023	2.2693e-08	11023	3.04169e-05	11023	2.10076e-09	11023	0.143004	11023	3.6409e-07
11024	3.06345e-08	11024	2.84506e-05	11024	4.03764e-08	11024	0.0828051	11024	2.09493e-07
11025	4.04695e-08	11025	3.97947e-05	11025	8.84936e-07	11025	0.0903997	11025	2.0545e-07
11026	5.57286e-08	11026	7.9376e-05	11026	1.54284e-05	11026	0.190699	11026	3.90343e-07
11027	8.36344e-08	11027	0.000208866	11027	0.000159703	11027	0.66491	11027	1.08392e-06
11028	1.33274e-07	11028	0.000630458	11028	0.00078557	11028	2.8004	11028	4.688e-06
11029	2.04997e-07	11029	0.0018012	11029	0.00159348	11029	9.84444	11029	1.75593e-05
11030	2.74493e-07	11030	0.00404171	11030	0.00129453	11030	21.5163	11030	7.68849e-05
11031	3.11663e-07	11031	0.00642104	11031	0.000476866	11031	25.9898	11031	0.000153293
11032	3.33984e-07	11032	0.00746192	11032	0.000107548	11032	19.0839	11032	0.000124447
11033	4.24018e-07	11033	0.00749319	11033	2.31419e-05	11033	11.1274	11033	9.0558e-05
11034	8.20934e-07	11034	0.00819375	11034	7.58524e-06	11034	7.14429	11034	0.000117536
11035	2.77499e-06	11035	0.0116954	11035	5.14799e-06	11035	6.42614	11035	0.000167748
11036	1.4995e-05	11036	0.0224547	11036	7.21152e-06	11036	8.49471	11036	0.000482395
11037	9.5624e-05	11037	0.0502145	11037	1.52972e-05	11037	14.2487	11037	0.00292873
11038	0.000483797	11038	0.10225	11038	3.12487e-05	11038	23.8593	11038	0.0195241
11039	0.00138787	11039	0.15046	11039	4.17994e-05	11039	32.6869	11039	0.0644913
11040	0.00190928	11040	0.141467	11040	3.0627e-05	11040	34.1783	11040	0.092259
11041	0.00129871	11041	0.0861018	11041	1.30606e-05	11041	29.2225	11041	0.0426448
11042	0.000528431	11042	0.0379042	11042	4.12111e-06	11042	23.6793	11042	0.0118591
11043	0.000168577	11043	0.0137822	11043	1.30816e-06	11043	20.8872	11043	0.00356469
11044	5.49819e-05	11044	0.00450605	11044	5.4353e-07	11044	21.4237	11044	0.000667703
11045	2.25449e-05	11045	0.00134538	11045	3.48438e-07	11045	25.2591	11045	0.000244615
11046	1.33841e-05	11046	0.000360401	11046	3.74581e-07	11046	32.7892	11046	7.77734e-05
11047	1.26414e-05	11047	8.78585e-05	11047	7.0973e-07	11047	45.8198	11047	1.49234e-05
11048	2.00558e-05	11048	2.13901e-05	11048	2.44308e-06	11048	69.9493	11048	2.99731e-06
11049	5.30839e-05	11049	6.14914e-06	11049	1.48314e-05	11049	119.771	11049	1.20026e-06
11050	0.000213039	11050	2.51324e-06	11050	0.000137529	11050	229.813	11050	9.05011e-07
11051	0.00107922	11051	1.65632e-06	11051	0.00149386	11051	473.346	11051	1.07144e-06
11052	0.0054822	11052	1.7783e-06	11052	0.0136846	11052	981.308	11052	4.03854e-06
11053	0.0224566	11053	2.78932e-06	11053	0.0783918	11053	1946.94	11053	8.50255e-06
11054	0.063233	11054	5.33467e-06	11054	0.231824	11054	3631.23	11054	1.9169e-05
11055	0.112653	11055	1.03561e-05	11055	0.336686	11055	6385.25	11055	9.04185e-05
11056	0.125699	11056	1.79224e-05	11056	0.260978	11056	10527.6	11056	0.000349871
11057	0.092284	11057	2.62228e-05	11057	0.129223	11057	15704.5	11057	0.000575876
11058	0.0489994	11058	3.28873e-05	11058	0.0512852	11058	19888.3	11058	0.000906804
11059	0.021348	11059	3.71664e-05	11059	0.0203737	11059	19958.1	11059	0.000708702
11060	0.00881521	11060	3.99318e-05	11060	0.00961598	11060	15146.1	11060	0.000461806
11061	0.0040006	11061	4.24549e-05	11061	0.00589307	11061	8633.06	11061	0.000460195
11062	0.00228978	11062	4.60141e-05	11062	0.00467119	11062	3830.1	11062	0.000279699
11063	0.00184271	11063	5.24146e-05	11063	0.00440207	11063	1417.7	11063	8.64633e-05
11064	0.00220125	11064	6.46312e-05	11064	0.00431262	11064	478.766	11064	2.62259e-05
11065	0.0037969	11065	8.67191e-05	11065	0.0038089	11065	162.42	11065	1.21443e-05
11066	0.00836798	11066	0.000120368	11066	0.00272828	11066	60.7099	11066	1.03923e-05
11067	0.0193032	11067	0.000153449	11067	0.00153623	11067	27.0456	11067	6.59611e-06
11068	0.0371384	11068	0.000152379	11068	0.000723367	11068	15.1571	11068	5.79224e-06
11069	0.0493602	11069	0.000100421	11069	0.000328908	11069	10.9083	11069	9.40637e-06
11070	0.0414625	11070	3.97226e-05	11070	0.000173602	11070	9.93831	11070	1.33916e-05
11071	0.0229967	11071	9.40732e-06	11071	0.000125428	11071	11.0098	11071	1.2803e-05
11072	0.00992838	11072	1.48221e-06	11072	0.00013581	11072	14.0805	11072	1.45699e-05
11073	0.0041609	11073	1.88524e-07	11073	0.000216393	11073	19.7201	11073	1.52173e-05
11074	0.00201913	11074	2.45126e-08	11074	0.000443785	11074	28.7323	11074	6.45036e-06
11075	0.00118426	11075	4.06373e-09	11075	0.000939358	11075	41.3559	11075	2.30387e-06
11076	0.000751321	11076	1.00194e-09	11076	0.00161342	11076	55.9132	11076	1.22479e-06
11077	0.000422593	11077	3.89629e-10	11077	0.0018913	11077	68.1768	11077	5.12734e-07
11078	0.000177112	11078	2.30544e-10	11078	0.00146363	11078	73.4174	11078	2.69301e-07
11079	5.25299e-05	11079	1.86202e-10	11079	0.000852261	11079	70.0228	11079	2.29136e-07
11080	1.23219e-05	11080	1.76902e-10	11080	0.000481532	11080	60.4802	11080	2.73884e-07
11081	2.93593e-06	11081	1.69835e-10	11081	0.000349984	11081	48.8632	11081	3.99716e-07
11082	9.74457e-07	11082	1.46745e-10	11082	0.000399032	11082	38.2077	11082	7.40543e-07
11083	5.9866e-07	11083	1.09299e-10	11083	0.000745619	11083	29.8135	11083	1.21242e-06
11084	8.04123e-07	11084	7.40886e-11	11084	0.00205091	11084	23.7867	11084	7.48274e-07
11085	2.37741e-06	11085	5.32326e-11	11085	0.0068577	11085	19.7327	11085	3.72527e-07
11086	1.34794e-05	11086	5.04627e-11	11086	0.0231178	11086	17.2013	11086	1.0298e-07
11087	0.000116887	11087	7.88036e-11	11087	0.0698371	11087	15.9098	11087	1.97274e-08
11088	0.00120528	11088	2.34851e-10	11088	0.182952	11088	15.8571	11088	1.05465e-08
11089	0.0116704	11089	1.34808e-09	11089	0.422765	11089	17.421	11089	2.26728e-08
11090	0.0859481	11090	1.28102e-08	11090	0.862737	11090	21.5097	11090	8.02146e-08
11091	0.395796	11091	1.50874e-07	11091	1.43907	11091	29.6943	11091	4.51989e-07
11092	0.941821	11092	1.51685e-06	11092	1.63687	11092	43.5858	11092	4.58038e-06
11093	0.970397	11093	8.82465e-06	11093	0.982112	11093	61.6512	11093	0.000102445
11094	0.379847	11094	2.11763e-05	11094	0.23939	11094	74.4268	11094	0.00110992
11095	0.0544391	11095	1.66373e-05	11095	0.0198493	11095	69.5092	11095	0.00185542
11096	0.00318019	11096	3.97083e-06	11096	0.000553743	11096	48.8273	11096	0.00067792
11097	0.000101175	11097	3.26406e-07	11097	6.49257e-06	11097	27.5755	11097	9.40942e-05
11098	2.83365e-06	11098	1.33316e-08	11098	5.24777e-08	11098	14.5444	11098	4.02794e-06
11099	1.3018e-07	11099	5.05113e-10	11099	6.16103e-10	11099	8.63802	11099	1.0069e-07
11100	1.84631e-08	11100	4.0158e-11	11100	2.47656e-11	11100	6.79582	11100	3.23961e-09
11101	1.25329e-08	11101	1.47309e-11	11101	6.81084e-12	11101	7.73884	11101	8.61244e-10
11102	4.35246e-08	11102	3.80318e-11	11102	1.59888e-11	11102	12.7431	11102	2.06101e-09
11103	5.5782e-07	11103	5.82612e-10	11103	2.23598e-10	11103	28.1751	11103	2.81864e-08
11104	1.48144e-05	11104	2.68529e-08	11104	8.72936e-09	11104	74.4598	11104	1.16922e-06
11105	0.000431184	11105	1.55151e-06	11105	4.10669e-07	11105	206.298	11105	6.65441e-05
11106	0.00792653	11106	5.18009e-05	11106	1.17618e-05	11106	527.768	11106	0.00266356
11107	0.0627914	11107	0.00059245	11107	0.000133712	11107	1118.47	11107	0.0490749
11108	0.17937	11108	0.00181125	11108	0.000507607	11108	1819.59	11108	0.345006
11109	0.190465	11109	0.00146773	11109	0.000670178	11109	2205.63	11109	0.918113
11110	0.0935256	11110	0.000379054	11110	0.00037691	11110	2044.09	11110	1.03753
11111	0.0303411	11111	4.35797e-05	11111	0.000123645	11111	1569.46	11111	0.605829
11112	0.00980417	11112	3.46363e-06	11112	3.44383e-05	11112	1123.83	11112	0.234064
11113	0.00450179	11113	3.10021e-07	11113	1.19367e-05	11113	850.778	11113	0.0784457
11114	0.00361168	11114	4.93464e-08	11114	7.15939e-06	11114	749.385	11114	0.0296969
11115	0.00521318	11115	1.959e-08	11115	9.24055e-06	11115	799.094	11115	0.0159168
11116	0.0122405	11116	2.26841e-08	11116	2.7313e-05	11116	1011.2	11116	0.0141928
11117	0.0401831	11117	7.38382e-08	11117	0.000165942	11117	1429.37	11117	0.022762
11118	0.15912	11118	5.56251e-07	11118	0.00160452	11118	2096.39	11118	0.0644775
11119	0.664583	11119	7.21046e-06	11119	0.0174379	11119	2979.57	11119	0.286328
11120	2.55988	11120	0.00011387	11120	0.147935	11120	3869.94	11120	1.61794
11121	7.91914	11121	0.00154961	11121	0.720739	11121	4360.31	11121	8.95276
11122	17.4017	11122	0.0134411	11122	1.66261	11122	4082.28	11122	37.4001
11123	25.2238	11123	0.0598215	11123	1.72524	11123	3110.09	11123	96.3512
11124	24.1388	11124	0.122894	11124	0.87846	11124	1960.6	11124	137.693
11125	16.4912	11125	0.117948	11125	0.266081	11125	1080.83	11125	109.325
11126	9.15526	11126	0.05943	11126	0.0612352	11126	557.441	11126	52.9131
11127	4.73494	11127	0.0190465	11127	0.0136152	11127	277.864	11127	18.0951
11128	2.52835	11128	0.00488594	11128	0.00356968	11128	128.368	11128	5.12661
11129	1.47165	11129	0.00126654	11129	0.0012896	11129	49.1457	11129	1.37946
11130	0.956508	11130	0.00040876	11130	0.000731429	11130	13.8441	11130	0.390291
11131	0.713654	11131	0.000192427	11131	0.00072567	11131	2.7936	11131	0.125209
11132	0.641385	11132	0.000142486	11132	0.0013209	11132	0.469769	11132	0.0484989
11133	0.728629	11133	0.000159501	11133	0.00409794	11133	0.092879	11133	0.0238489
11134	1.04613	11134	0.000229946	11134	0.0173169	11134	0.0334813	11134	0.0151615
11135	1.73848	11135	0.000336528	11135	0.071595	11135	0.0308239	11135	0.0120002
11136	2.8161	11136	0.000396217	11136	0.207075	11136	0.0762116	11136	0.0107115
11137	3.61943	11137	0.000325906	11137	0.331473	11137	0.386224	11137	0.00941109
11138	3.1055	11138	0.000187488	11138	0.273317	11138	2.56157	11138	0.00714969
11139	1.63022	11139	8.66595e-05	11139	0.127399	11139	14.5281	11139	0.00433391
11140	0.535516	11140	4.01448e-05	11140	0.0415977	11140	53.9934	11140	0.00208858
11141	0.125589	11141	2.32908e-05	11141	0.0125032	11141	122.386	11141	0.000868542
11142	0.0262489	11142	1.97431e-05	11142	0.00455234	11142	184.068	11142	0.000364852
11143	0.00642109	11143	2.57206e-05	11143	0.00253237	11143	217.289	11143	0.000189282
11144	0.00238146	11144	4.88681e-05	11144	0.002501	11144	239.945	11144	0.000146251
11145	0.00157678	11145	0.000118044	11145	0.00449339	11145	280.536	11145	0.000186465
11146	0.00186692	11146	0.000296942	11146	0.0128555	11146	362.86	11146	0.000378623
11147	0.00334047	11147	0.000616629	11147	0.0444343	11147	503.692	11147	0.00102924
11148	0.00686513	11148	0.00084642	11148	0.13146	11148	696.842	11148	0.00290846
11149	0.0122997	11149	0.00065426	11149	0.245669	11149	888.345	11149	0.00668695
11150	0.0160165	11150	0.000270744	11150	0.246451	11150	991.754	11150	0.0106244
11151	0.0146232	11151	6.54992e-05	11151	0.137887	11151	963.307	11151	0.0111461
11152	0.0104399	11152	1.15871e-05	11152	0.0547409	11152	845.781	11152	0.00826336
11153	0.0071564	11153	2.05369e-06	11153	0.0224543	11153	719.014	11153	0.00500957
11154	0.00586413	11154	5.01809e-07	11154	0.0138669	11154	637.63	11154	0.0029451
11155	0.00665381	11155	2.10286e-07	11155	0.0160799	11155	621.934	11155	0.00192876
11156	0.0107333	11156	1.58026e-07	11156	0.0341228	11156	675.902	11156	0.00150385
11157	0.0227534	11157	1.88182e-07	11157	0.104836	11157	796.538	11157	0.00137847
11158	0.0564361	11158	2.87955e-07	11158	0.344688	11158	969.166	11158	0.00139842
11159	0.151177	11159	4.69696e-07	11159	0.973805	11159	1163.14	11159	0.0014868
11160	0.432604	11160	7.4714e-07	11160	2.23548	11160	1344.71	11160	0.00165023
11161	1.36262	11161	1.177e-06	11161	4.56129	11161	1499.8	11161	0.00201395
11162	4.7121	11162	1.94787e-06	11162	9.46636	11162	1639.49	11162	0.00287838
11163	16.1018	11163	3.43123e-06	11163	21.0599	11163	1780.85	11163	0.00482908
11164	43.5501	11164	5.8961e-06	11164	45.2287	11164	1923.02	11164	0.00854255
11165	70.6789	11165	8.43105e-06	11165	74.4312	11165	2038.26	11165	0.0130578
11166	55.1163	11166	8.84068e-06	11166	74.001	11166	2088.22	11166	0.0140546
11167	19.4918	11167	6.98213e-06	11167	39.9516	11167	2058.77	11167	0.00965634
11168	3.72555	11168	5.30195e-06	11168	13.1217	11168	1981.83	11168	0.00464189
11169	0.577403	11169	5.84695e-06	11169	3.66783	11169	1921.06	11169	0.00209038
11170	0.123874	11170	1.403e-05	11170	1.37841	11170	1940.79	11170	0.00131986
11171	0.0587771	11171	8.66546e-05	11171	1.03626	11171	2087.53	11171	0.00164215
11172	0.0749219	11172	0.00113629	11172	1.82642	11172	2379.3	11172	0.00444521
11173	0.217624	11173	0.0196534	11173	6.52434	11173	2778.48	11173	0.0212761
11174	0.942689	11174	0.257531	11174	32.7615	11174	3149.89	11174	0.118154
11175	3.75608	11175	1.63117	11175	151.046	11175	3274	11175	0.479769
11176	9.48819	11176	3.86984	11176	451.299	11176	2991.41	11176	0.996579
11177	12.6719	11177	3.26607	11177	715.088	11177	2368.28	11177	0.881711
11178	9.02415	11178	1.1053	11178	576.959	11178	1650.28	11178	0.331473
11179	3.98264	11179	0.19134	11179	261.024	11179	1052.14	11179	0.0615427
11180	1.35969	11180	0.023265	11180	80.2499	11180	645.785	11180	0.00730487
11181	0.448058	11181	0.0028025	11181	21.2537	11181	403.22	11181	0.000758433
11182	0.168662	11182	0.000466044	11182	6.10334	11182	271.017	11182	9.46938e-05
11183	0.0800666	11183	0.000142646	11183	2.28018	11183	207.327	11183	1.8899e-05
11184	0.0503259	11184	9.93991e-05	11184	1.24513	11184	188.984	11184	7.57687e-06
11185	0.0433035	11185	0.000174692	11185	1.05082	11185	209.156	11185	7.12586e-06
11186	0.0529747	11186	0.00074216	11186	1.3809	11186	274.291	11186	1.65791e-05
11187	0.0946334	11187	0.00621887	11187	2.71341	11187	397.628	11187	8.7405e-05
11188	0.240104	11188	0.073066	11188	7.18366	11188	578.421	11188	0.000814498
11189	0.768173	11189	0.797185	11189	21.4085	11189	768.79	11189	0.00921539
11190	2.52984	11190	5.46343	11190	56.6154	11190	877.134	11190	0.0834897
11191	6.82996	11191	17.7132	11191	104.202	11191	844.976	11191	0.424958
11192	12.7482	11192	24.0987	11192	111.516	11192	705.962	11192	0.979468
11193	15.6454	11193	14.5888	11193	65.1729	11193	540.242	11193	0.97647
11194	13.7483	11194	4.84222	11194	22.4003	11194	402.91	11194	0.470682
11195	10.3931	11195	1.18224	11195	5.49359	11195	308.6	11195	0.137352
11196	8.32847	11196	0.285621	11196	1.25483	11196	251.099	11196	0.0320796
11197	8.28071	11197	0.0859712	11197	0.353339	11197	220.264	11197	0.00789893
11198	10.8376	11198	0.03692	11198	0.155532	11198	208.248	11198	0.00257363
11199	17.9279	11199	0.0238457	11199	0.124359	11199	209.983	11199	0.00129109
11200	33.6541	11200	0.0230922	11200	0.186946	11200	221.884	11200	0.00106013
11201	62.7605	11201	0.0321131	11201	0.482872	11201	240.257	11201	0.00137559
11202	102.626	11202	0.0590258	11202	1.75812	11202	259.922	11202	0.00248556
11203	133.761	11203	0.126933	11203	6.93831	11203	273.665	11203	0.00514416
11204	131.891	11204	0.276422	11204	22.7101	11204	273.57	11204	0.00975554
11205	98.4865	11205	0.532277	11205	49.8002	11205	254.781	11205	0.0138871
11206	59.0944	11206	0.822795	11206	65.0696	11206	219.553	11206	0.0130543
11207	31.8171	11207	0.976968	11207	50.4347	11207	176.903	11207	0.00789691
11208	17.6039	11208	0.892165	11208	25.5668	11208	136.913	11208	0.00333841
11209	11.2576	11209	0.643612	11209	10.002	11209	105.24	11209	0.00116734
11210	8.78143	11210	0.379311	11210	3.63591	11210	82.3626	11210	0.000415283
11211	8.07725	11211	0.188786	11211	1.443	11211	65.9755	11211	0.000181019
11212	7.87621	11212	0.0825512	11212	0.699243	11212	53.4238	11212	0.000108599
11213	7.16675	11213	0.0336926	11213	0.441498	11213	43.0865	11213	9.25427e-05
11214	5.5994	11214	0.0140851	11214	0.377938	11214	34.7173	11214	0.000108659
11215	3.80034	11215	0.00682025	11215	0.454521	11215	28.8885	11215	0.000166922
11216	2.51947	11216	0.00436163	11216	0.794656	11216	26.2783	11216	0.00032095
11217	1.95726	11217	0.00408112	11217	2.04499	11217	27.6305	11217	0.000744776
11218	2.09835	11218	0.00578984	11218	7.43945	11218	34.3494	11218	0.00198741
11219	3.29047	11219	0.0118356	11219	34.187	11219	48.9232	11219	0.0056448
11220	6.91205	11220	0.030636	11220	166.39	11220	73.4857	11220	0.0153749
11221	15.8442	11221	0.0839772	11221	697.61	11221	104.219	11221	0.0357966
11222	30.931	11222	0.200242	11222	2069.11	11222	125.069	11222	0.0636282
11223	41.3937	11223	0.343325	11223	3710.05	11223	116.151	11223	0.077152
11224	32.9855	11224	0.359562	11224	3635.33	11224	78.4412	11224	0.0566623
11225	14.947	11225	0.206832	11225	1880.73	11225	37.3079	11225	0.0224251
11226	4.07167	11226	0.0649091	11226	537.405	11226	12.5843	11226	0.00442665
11227	0.782333	11227	0.0127631	11227	97.5142	11227	3.20257	11227	0.000446528
11228	0.1367	11228	0.00213679	11228	14.2596	11228	0.700043	11228	2.78463e-05
11229	0.0296076	11229	0.000473411	11229	2.29636	11229	0.159478	11229	1.58604e-06
11230	0.0106437	11230	0.000219858	11230	0.562343	11230	0.0475292	11230	1.43372e-07
11231	0.0076558	11231	0.000289987	11231	0.267574	11231	0.0228591	11231	3.65929e-08
11232	0.0112568	11232	0.00108733	11232	0.271854	11232	0.0203239	11232	3.8599e-08
11233	0.0292292	11233	0.00843677	11233	0.546055	11233	0.0340899	11233	1.67744e-07
11234	0.103014	11234	0.0813449	11234	1.75615	11234	0.0968643	11234	1.99584e-06
11235	0.362556	11235	0.575063	11235	6.85604	11235	0.375852	11235	3.41274e-05
11236	0.960704	11236	1.97619	11236	24.65	11236	1.50968	11236	0.000439225
11237	1.56498	11237	2.6502	11237	65.2102	11237	4.75064	11237	0.00262499
11238	1.4489	11238	1.39828	11238	110.596	11238	9.38028	11238	0.00568049
11239	0.822042	11239	0.370327	11239	116.519	11239	10.3031	11239	0.00442536
11240	0.35937	11240	0.0764892	11240	82.2603	11240	6.32855	11240	0.00153625
11241	0.169042	11241	0.0207955	11241	45.7378	11241	2.47792	11241	0.000347549
11242	0.119734	11242	0.0113449	11242	24.5523	11242	0.778254	11242	8.10305e-05
11243	0.157801	11243	0.0143701	11243	15.3684	11243	0.258031	11243	2.94677e-05
11244	0.386802	11244	0.0355062	11244	12.6569	11244	0.115503	11244	2.14217e-05
11245	1.4324	11245	0.117611	11245	14.0243	11245	0.0808529	11245	3.15235e-05
11246	5.78771	11246	0.35472	11246	19.4421	11246	0.0894789	11246	7.65466e-05
11247	18.4514	11247	0.753984	11247	29.5154	11247	0.140394	11247	0.000220533
11248	36.9322	11248	1.04876	11248	42.5239	11248	0.263778	11248	0.000537298
11249	42.729	11249	1.04023	11249	52.3931	11249	0.507659	11249	0.000863828
11250	30.6533	11250	0.882438	11250	53.3977	11250	0.914842	11250	0.000831868
11251	16.4855	11251	0.778812	11251	46.9939	11251	1.53419	11251	0.000513519
11252	8.41729	11252	0.817204	11252	39.3286	11252	2.53645	11252	0.000246873
11253	4.89789	11253	1.04581	11253	34.8488	11253	4.47227	11253	0.000117196
11254	3.38533	11254	1.51046	11254	35.2544	11254	8.90326	11254	6.56979e-05
11255	2.45826	11255	2.16381	11255	41.5553	11255	20.313	11255	4.59028e-05
11256	1.50412	11256	2.75391	11256	55.4505	11256	51.9721	11256	3.76113e-05
11257	0.640082	11257	3.00435	11257	79.3418	11257	142.816	11257	3.26808e-05
11258	0.182315	11258	2.97001	11258	114.865	11258	397.054	11258	2.84012e-05
11259	0.0416543	11259	2.99997	11259	159.278	11259	1026.34	11259	2.5038e-05
11260	0.0110488	11260	3.51241	11260	200.443	11260	2204.76	11260	2.35823e-05
11261	0.00518276	11261	5.11631	11261	217.652	11261	3502.2	11261	2.42919e-05
11262	0.00565846	11262	9.12773	11262	197.612	11262	3828.39	11262	2.61567e-05
11263	0.014188	11263	18.3004	11263	151.384	11263	2948.84	11263	2.68473e-05
11264	0.0613814	11264	37.0475	11264	103.677	11264	1833.41	11264	2.45346e-05
11265	0.305711	11265	69.9516	11265	69.0946	11265	1133.82	11265	2.05191e-05
11266	1.23738	11266	119.348	11266	47.6161	11266	847.39	11266	1.81756e-05
11267	3.36634	11267	184.305	11267	33.3232	11267	837.134	11267	2.11465e-05
11268	6.04078	11268	258.325	11268	21.0782	11268	1036.32	11268	3.86535e-05
11269	7.93852	11269	321.764	11269	10.1268	11269	1376.18	11269	0.000115347
11270	8.93123	11270	340.522	11270	3.21372	11270	1658.83	11270	0.000487625
11271	9.89478	11271	292.923	11271	0.671953	11271	1647.33	11271	0.0022159
11272	11.7004	11272	202.355	11272	0.112965	11272	1352.02	11272	0.00787414
11273	14.9286	11273	116.65	11273	0.0223539	11273	987.23	11273	0.016536
11274	19.7325	11274	60.9865	11274	0.00804807	11274	693.161	11274	0.0167812
11275	25.4337	11275	32.0786	11275	0.00705771	11275	476.69	11275	0.0073512
11276	30.41	11276	18.687	11276	0.015039	11276	301.373	11276	0.0013615
11277	33.0764	11277	12.9367	11277	0.0584675	11277	156.167	11277	0.000116554
11278	33.2959	11278	11.0877	11278	0.274143	11278	59.8692	11278	5.82846e-06
11279	32.5169	11279	11.9328	11279	1.08146	11279	16.5361	11279	2.57029e-07
11280	32.6751	11280	15.93	11280	2.93629	11280	3.58683	11280	1.77912e-08
11281	35.3703	11281	25.2608	11281	5.33207	11281	0.742697	11281	3.62287e-09
11282	41.7127	11282	43.9446	11282	7.12672	11282	0.189593	11282	3.43547e-09
11283	51.9149	11283	74.8142	11283	8.13569	11283	0.0752513	11283	1.62447e-08
11284	63.8742	11284	108.745	11284	9.07442	11284	0.0522901	11284	2.6296e-07
11285	72.0248	11285	117.859	11285	10.6672	11285	0.0608226	11285	7.55418e-06
11286	70.1192	11286	85.8288	11286	13.2812	11286	0.0978666	11286	0.000192999
11287	57.5385	11287	40.2907	11287	16.7023	11287	0.167689	11287	0.00253352
11288	40.5685	11288	12.7641	11288	19.8871	11288	0.240647	11288	0.0121126
11289	26.0303	11289	3.14774	11289	21.3772	11289	0.249362	11289	0.018117
11290	16.479	11290	0.756829	11290	20.5435	11290	0.181474	11290	0.0085023
11291	11.1905	11291	0.230568	11291	18.2125	11291	0.100568	11291	0.00141825
11292	8.70138	11292	0.111619	11292	15.8299	11292	0.0492249	11292	0.000105538
11293	7.99265	11293	0.0962282	11293	14.4488	11293	0.0250731	11293	4.82961e-06
11294	8.60773	11294	0.141852	11294	14.5865	11294	0.0152859	11294	2.04025e-07
11295	10.4699	11295	0.300578	11295	16.5581	11295	0.0123942	11295	1.26917e-08
11296	13.6972	11296	0.727388	11296	20.6584	11296	0.0145718	11296	1.8587e-09
11297	18.4795	11297	1.64726	11297	26.9444	11297	0.0269282	11297	9.27197e-10
11298	25.0096	11298	3.10594	11298	34.7352	11298	0.0825116	11298	1.82136e-09
11299	33.2757	11299	4.68991	11299	42.3871	11299	0.405595	11299	1.19752e-08
11300	42.3241	11300	5.63011	11300	47.918	11300	2.68533	11300	1.6862e-07
11301	49.1357	11301	5.2325	11301	50.0962	11301	17.5302	11301	2.79456e-06
11302	49.1116	11302	3.53637	11302	48.9579	11302	78.1631	11302	3.05759e-05
11303	40.2953	11303	1.62675	11303	45.4672	11303	175.945	11303	0.000145441
11304	26.8981	11304	0.505707	11304	40.8826	11304	174.823	11304	0.000251469
11305	15.2966	11305	0.118083	11305	36.2983	11305	83.3445	11305	0.000171353
11306	8.14742	11306	0.0259945	11306	32.4409	11306	25.3072	11306	6.29802e-05
11307	4.56418	11307	0.00726404	11307	29.6584	11307	7.28078	11307	1.9973e-05
11308	2.97929	11308	0.00338685	11308	28.0285	11308	2.8955	11308	9.00398e-06
11309	2.41728	11309	0.00309161	11309	27.5167	11309	2.01172	11309	8.45722e-06
11310	2.4919	11310	0.00558854	11310	28.1351	11310	2.54676	11310	1.9445e-05
11311	3.22451	11311	0.017917	11311	30.0731	11311	5.28465	11311	0.000101644
11312	5.04081	11312	0.0849237	11312	33.7497	11312	15.1542	11312	0.000944645
11313	8.91938	11313	0.476401	11313	39.675	11313	50.0847	11313	0.0111593
11314	16.2296	11314	2.4516	11314	47.8741	11314	158.066	11314	0.116344
11315	26.9242	11315	8.77746	11315	56.624	11315	386.298	11315	0.749499
11316	36.118	11316	16.8191	11316	61.32	11316	584.406	11316	2.17585
11317	36.1459	11317	14.3115	11317	56.5409	11317	450.89	11317	2.24574
11318	26.9124	11318	5.18381	11318	42.1901	11318	161.042	11318	0.734145
11319	16.3791	11319	0.931914	11319	25.3684	11319	28.2872	11319	0.0798562
11320	9.7182	11320	0.118878	11320	12.9944	11320	3.11976	11320	0.00371287
11321	6.90504	11321	0.0177122	11321	6.3356	11321	0.321562	11321	0.000117339
11322	6.8957	11322	0.00505714	11322	3.38906	11322	0.0486914	11322	4.74134e-06
11323	10.187	11323	0.00377122	11323	2.2733	11323	0.01555	11323	4.73809e-07
11324	20.6543	11324	0.00738384	11324	2.07657	11324	0.0121459	11324	1.86672e-07
11325	48.7848	11325	0.0288458	11325	2.59211	11325	0.0211993	11325	3.1451e-07
11326	111.407	11326	0.149096	11326	4.10297	11326	0.0646128	11326	1.63972e-06
11327	211.918	11327	0.692629	11327	7.27781	11327	0.259815	11327	1.51275e-05
11328	309.846	11328	2.21924	11328	12.7181	11328	1.09928	11328	0.00014001
11329	344.395	11329	4.34766	11329	19.9068	11329	4.23174	11329	0.000850877
11330	302.246	11330	5.19756	11330	26.7791	11330	13.6579	11330	0.0026864
11331	222.084	11331	4.08037	11331	31.2982	11331	35.1714	11331	0.00411175
11332	144.491	11332	2.34358	11332	33.2197	11332	69.363	11332	0.00318661
11333	86.9143	11333	1.10334	11333	33.7369	11333	100.62	11333	0.00138805
11334	50.0297	11334	0.472269	11334	34.0815	11334	103.844	11334	0.000386853
11335	28.5961	11335	0.200841	11335	34.7765	11335	75.3771	11335	7.9512e-05
11336	17.0276	11336	0.091565	11336	35.6243	11336	39.5629	11336	1.41677e-05
11337	11.1918	11337	0.0479688	11337	36.0291	11337	16.2748	11337	2.6644e-06
11338	8.60624	11338	0.0309188	11338	35.5169	11338	6.01792	11338	6.70577e-07
11339	8.11381	11339	0.0261787	11339	34.2707	11339	2.39843	11339	2.91922e-07
11340	9.63967	11340	0.0304995	11340	33.3234	11340	1.25384	11340	2.73452e-07
11341	14.4814	11341	0.0489239	11341	34.386	11341	1.01734	11341	6.08529e-07
11342	26.7831	11342	0.101076	11342	39.9094	11342	1.40949	11342	2.95416e-06
11343	57.0947	11343	0.234154	11343	54.0222	11343	3.30647	11343	2.37772e-05
11344	125.73	11344	0.499377	11344	84.1196	11344	11.6809	11344	0.000212332
11345	248.413	11345	0.7838	11345	140.017	11345	50.9178	11345	0.00136553
11346	383.607	11346	0.742314	11346	222.353	11346	217.821	11346	0.00437902
11347	423.781	11347	0.379624	11347	300.766	11347	749.241	11347	0.00556276
11348	334.167	11348	0.107855	11348	322.428	11348	1826.68	11348	0.00266662
11349	206.017	11349	0.0205177	11349	271.645	11349	3032.97	11349	0.000559325
11350	115.899	11350	0.00357994	11350	189.55	11350	3537.37	11350	7.12317e-05
11351	69.9873	11351	0.000823188	11351	120.127	11351	3119.46	11351	8.65647e-06
11352	50.907	11352	0.000338724	11352	76.8508	11352	2281.95	11352	1.62461e-06
11353	46.5002	11353	0.000295138	11353	54.797	11353	1531.49	11353	6.97324e-07
11354	52.3314	11354	0.000551139	11354	47.2563	11354	1048.29	11354	8.39972e-07
11355	69.5005	11355	0.00198652	11355	52.2466	11355	812.818	11355	2.78433e-06
11356	105.034	11356	0.011705	11356	75.9661	11356	779.129	11356	2.06339e-05
11357	175.793	11357	0.0924548	11357	142.016	11357	965.188	11357	0.000247499
11358	312.517	11358	0.776156	11358	313.704	11358	1509.86	11358	0.00331215
11359	543.072	11359	5.29844	11359	709.072	11359	2699.53	11359	0.0340112
11360	812.265	11360	22.306	11360	1377.61	11360	4711.62	11360	0.191475
11361	908.685	11361	46.0414	11361	1969.31	11361	6757.33	11361	0.458531
11362	686.052	11362	41.2607	11362	1899.32	11362	6943.5	11362	0.411177
11363	342.67	11363	16.436	11363	1248.55	11363	4771.04	11363	0.142306
11364	122.884	11364	3.43447	11364	619.065	11364	2199.93	11364	0.0230846
11365	37.415	11365	0.489617	11365	270.278	11365	721.231	11365	0.00243845
11366	11.9064	11366	0.0635224	11366	121.337	11366	183.627	11366	0.000248791
11367	4.7798	11367	0.00959108	11367	62.5367	11367	40.3376	11367	3.5314e-05
11368	2.72369	11368	0.00200518	11368	38.7456	11368	8.63902	11368	8.96479e-06
11369	2.26341	11369	0.000653779	11369	28.6069	11369	2.0746	11369	4.51679e-06
11370	2.61142	11370	0.000367631	11370	24.2315	11370	0.643022	11370	4.44069e-06
11371	3.8287	11371	0.000391579	11371	22.5594	11371	0.284715	11371	7.81983e-06
11372	6.51497	11372	0.000831735	11372	22.2805	11372	0.183367	11372	2.19344e-05
11373	11.9877	11373	0.00335434	11373	22.7065	11373	0.158764	11373	8.52414e-05
11374	22.7701	11374	0.0215027	11374	23.3203	11374	0.161122	11374	0.000390676
11375	43.3528	11375	0.166857	11375	23.6786	11375	0.169508	11375	0.0017846
11376	80.707	11376	1.17278	11376	23.548	11376	0.176116	11376	0.00703056
11377	141.966	11377	5.88611	11377	22.9998	11377	0.186283	11377	0.0217992
11378	223.039	11378	17.9998	11378	22.1832	11378	0.210836	11378	0.0516152
11379	287.783	11379	30.5038	11379	20.8838	11379	0.251188	11379	0.0943585
11380	275.294	11380	26.9319	11380	18.35	11380	0.276417	11380	0.135415
11381	177.686	11381	11.838	11381	13.9796	11381	0.226899	11381	0.151673
11382	73.6535	11382	2.54523	11382	8.57303	11382	0.113695	11382	0.128539
11383	20.161	11383	0.279281	11383	4.08018	11383	0.0320601	11383	0.0796747
11384	4.09917	11384	0.0178836	11384	1.54725	11384	0.00562048	11384	0.0359256
11385	0.749603	11385	0.000844655	11385	0.509562	11385	0.000802077	11385	0.0123121
11386	0.15403	11386	4.00032e-05	11386	0.163858	11386	0.000132701	11386	0.00351979
11387	0.0434228	11387	2.61992e-06	11387	0.0575086	11387	3.46605e-05	11387	0.000949734
11388	0.0191558	11388	3.0999e-07	11388	0.0239052	11388	1.66999e-05	11388	0.000274909
11389	0.013812	11389	7.80203e-08	11389	0.0123766	11389	1.44934e-05	11389	9.54945e-05
11390	0.0156591	11390	4.36204e-08	11390	0.00822751	11390	1.96175e-05	11390	4.3427e-05
11391	0.0252043	11391	5.07211e-08	11391	0.00714445	11391	3.47581e-05	11391	2.74326e-05
11392	0.0498286	11392	1.05355e-07	11392	0.00806937	11392	6.95999e-05	11392	2.47122e-05
11393	0.102459	11393	3.17527e-07	11393	0.0113705	11393	0.000141545	11393	3.11943e-05
11394	0.186346	11394	1.10879e-06	11394	0.018367	11394	0.000268845	11394	5.1428e-05
11395	0.263654	11395	3.66959e-06	11395	0.0304168	11395	0.000440745	11395	9.8325e-05
11396	0.270829	11396	9.94822e-06	11396	0.0464185	11396	0.000577793	11396	0.00018862
11397	0.202592	11397	2.04084e-05	11397	0.0608985	11397	0.000570283	11397	0.000316847
11398	0.118439	11398	3.1097e-05	11398	0.0677012	11398	0.000414247	11398	0.000424377
11399	0.0608854	11399	3.61892e-05	11399	0.0662986	11399	0.000228938	11399	0.000439658
11400	0.0314709	11400	3.41483e-05	11400	0.0615271	11400	0.00010595	11400	0.000364308
11401	0.0183368	11401	2.82185e-05	11401	0.0584932	11401	4.74735e-05	11401	0.000260247
11402	0.0127744	11402	2.19856e-05	11402	0.05993	11402	2.40917e-05	11402	0.000173041
11403	0.0103963	11403	1.68779e-05	11403	0.066147	11403	1.55146e-05	11403	0.000110966
11404	0.00885549	11404	1.26831e-05	11404	0.074412	11404	1.29832e-05	11404	6.66432e-05
11405	0.00667502	11405	8.84676e-06	11405	0.0781976	11405	1.31061e-05	11405	3.4538e-05
11406	0.00377248	11406	5.38378e-06	11406	0.0712493	11406	1.40056e-05	11406	1.41714e-05
11407	0.00146016	11407	2.82161e-06	11407	0.0553714	11407	1.40969e-05	11407	4.485e-06
11408	0.000404491	11408	1.38445e-06	11408	0.0391683	11408	1.27734e-05	11408	1.19243e-06
11409	9.78258e-05	11409	7.66002e-07	11409	0.0287827	11409	1.0865e-05	11409	3.28159e-07
11410	2.82523e-05	11410	6.05506e-07	11410	0.0255188	11410	9.54026e-06	11410	1.24563e-07
11411	1.34535e-05	11411	8.25806e-07	11411	0.0302495	11411	9.39518e-06	11411	8.52053e-08
11412	1.28547e-05	11412	2.02779e-06	11412	0.0483784	11412	1.04924e-05	11412	1.20278e-07
11413	2.41372e-05	11413	7.80288e-06	11413	0.09547	11413	1.23022e-05	11413	3.3061e-07
11414	7.13062e-05	11414	3.59666e-05	11414	0.199451	11414	1.32865e-05	11414	1.41626e-06
11415	0.000241098	11415	0.000147352	11415	0.372855	11415	1.1619e-05	11415	7.07094e-06
11416	0.00069635	11416	0.000422239	11416	0.539854	11416	7.56246e-06	11416	3.18464e-05
11417	0.00142	11417	0.000740195	11417	0.547128	11417	3.58731e-06	11417	0.000110234
11418	0.00190252	11418	0.000778079	11418	0.368131	11418	1.29324e-06	11418	0.00027789
11419	0.00170731	11419	0.000529796	11419	0.163929	11419	3.88335e-07	11419	0.000522229
11420	0.00109543	11420	0.000269661	11420	0.0509084	11420	1.0921e-07	11420	0.000769773
11421	0.000540981	11421	0.00012168	11421	0.0123973	11421	3.21702e-08	11421	0.000918435
11422	0.000220463	11422	5.70825e-05	11422	0.00284733	11422	1.07732e-08	11422	0.000878641
11423	8.02345e-05	11423	3.14132e-05	11423	0.000777789	11423	4.30299e-09	11423	0.000650833
11424	2.91401e-05	11424	2.18158e-05	11424	0.000317688	11424	2.11738e-09	11424	0.000366936
11425	1.22409e-05	11425	1.97081e-05	11425	0.000227001	11425	1.33377e-09	11425	0.000164786
11426	6.921e-06	11426	2.30268e-05	11426	0.000292475	11426	1.12465e-09	11426	6.68663e-05
11427	5.79101e-06	11427	3.34189e-05	11427	0.000611633	11427	1.29977e-09	11427	2.95002e-05
11428	7.08582e-06	11428	5.60114e-05	11428	0.00169951	11428	1.99169e-09	11428	1.71608e-05
11429	1.1287e-05	11429	9.90091e-05	11429	0.00497474	11429	3.64816e-09	11429	1.52249e-05
11430	1.99545e-05	11430	0.00017045	11430	0.0124359	11430	6.88038e-09	11430	2.195e-05
11431	3.46519e-05	11431	0.000274386	11431	0.0226921	11431	1.15461e-08	11431	5.00317e-05
11432	5.69061e-05	11432	0.000413108	11432	0.0274169	11432	1.55399e-08	11432	0.000160762
11433	9.12292e-05	11433	0.00058536	11433	0.0209017	11433	1.58593e-08	11433	0.000597404
11434	0.000149	11434	0.000750539	11434	0.00994067	11434	1.19187e-08	11434	0.00195957
11435	0.000248048	11435	0.000780281	11435	0.00303318	11435	6.47734e-09	11435	0.00418258
11436	0.000403174	11436	0.000568726	11436	0.000653055	11436	2.57707e-09	11436	0.00444488
11437	0.000618683	11437	0.000264799	11437	0.000121622	11437	8.28035e-10	11437	0.00204741
11438	0.000931779	11438	8.33766e-05	11438	2.72339e-05	11438	2.7268e-10	11438	0.000439594
11439	0.00156586	11439	2.29414e-05	11439	1.09223e-05	11439	1.33347e-10	11439	6.05756e-05
11440	0.00345866	11440	8.27931e-06	11440	1.08143e-05	11440	1.42937e-10	11440	8.95965e-06
11441	0.0110859	11441	5.811e-06	11441	2.84502e-05	11441	4.16986e-10	11441	2.44537e-06
11442	0.0491341	11442	9.43763e-06	11442	0.000156323	11442	2.98617e-09	11442	1.72247e-06
11443	0.246207	11443	3.01231e-05	11443	0.00113644	11443	3.50801e-08	11443	3.0382e-06
11444	1.05804	11444	0.000122581	11444	0.00676286	11444	3.98327e-07	11444	9.39152e-06
11445	3.07432	11445	0.000385198	11445	0.0234696	11445	2.78166e-06	11445	3.14224e-05
11446	5.41366	11446	0.000646046	11446	0.041919	11446	9.32746e-06	11446	7.69964e-05
11447	6.07559	11447	0.000511416	11447	0.041472	11447	1.48649e-05	11447	0.000115879
11448	5.19601	11448	0.000219901	11448	0.0276729	11448	1.35962e-05	11448	0.000113068
11449	4.24483	11449	7.19776e-05	11449	0.0155487	11449	9.68485e-06	11449	8.89687e-05
11450	3.94205	11450	2.67962e-05	11450	0.00868139	11450	7.40723e-06	11450	7.37379e-05
11451	4.38995	11451	1.54417e-05	11451	0.00521289	11451	7.79744e-06	11451	7.81412e-05
11452	5.4768	11452	1.53691e-05	11452	0.00343028	11452	1.28201e-05	11452	0.000110699
11453	6.71145	11453	2.42636e-05	11453	0.00250069	11453	3.29449e-05	11453	0.000189704
11454	7.13388	11454	5.04422e-05	11454	0.0020994	11454	0.000119561	11454	0.000331227
11455	6.1154	11455	0.000115703	11455	0.0021633	11455	0.000515497	11455	0.000505822
11456	4.18944	11456	0.000265013	11456	0.00289888	11456	0.00213766	11456	0.000629727
11457	2.41394	11457	0.000600099	11457	0.0051642	11457	0.00690876	11457	0.000659942
11458	1.30187	11458	0.00141748	11458	0.0119617	11458	0.0147657	11458	0.000654879
11459	0.76679	11459	0.00375059	11459	0.0340079	11459	0.0192916	11459	0.000722246
11460	0.58572	11460	0.0115257	11460	0.108962	11460	0.0158272	11460	0.00102016
11461	0.659652	11461	0.0393671	11461	0.350464	11461	0.00920346	11461	0.00196069
11462	1.10951	11462	0.12967	11462	0.975692	11462	0.00450576	11462	0.00483765
11463	2.42853	11463	0.331067	11463	1.99422	11463	0.00217986	11463	0.0129716
11464	5.37798	11464	0.515036	11464	2.6019	11464	0.001141	11464	0.0303413
11465	9.19229	11465	0.400831	11465	2.03827	11465	0.000642824	11465	0.0506716
11466	10.0681	11466	0.141382	11466	1.01605	11466	0.000357738	11466	0.0534202
11467	6.79767	11467	0.02327	11467	0.385653	11467	0.000173842	11467	0.0347154
11468	3.15183	11468	0.00208516	11468	0.143211	11468	6.58416e-05	11468	0.0147522
11469	1.22129	11469	0.000130072	11469	0.0655583	11469	1.81387e-05	11469	0.00453226
11470	0.482653	11470	7.52673e-06	11470	0.0418748	11470	3.62624e-06	11470	0.00111414
11471	0.222974	11471	5.37094e-07	11471	0.0368845	11471	5.70027e-07	11471	0.000239536
11472	0.128384	11472	6.14605e-08	11472	0.0407748	11472	8.36423e-08	11472	4.96666e-05
11473	0.0950522	11473	1.42768e-08	11473	0.0521474	11473	1.46896e-08	11473	1.14448e-05
11474	0.0940776	11474	8.10211e-09	11474	0.0769274	11474	4.03808e-09	11474	3.56928e-06
11475	0.129797	11475	1.20548e-08	11475	0.139866	11475	2.10555e-09	11475	1.85992e-06
11476	0.248069	11476	4.17175e-08	11476	0.33384	11476	2.14599e-09	11476	1.85992e-06
11477	0.590713	11477	2.41464e-07	11477	1.02733	11477	3.70602e-09	11477	3.52441e-06
11478	1.42634	11478	1.47024e-06	11478	3.59811	11478	8.57733e-09	11478	1.06014e-05
11479	2.73233	11479	5.95459e-06	11479	11.8548	11479	2.16106e-08	11479	3.84072e-05
11480	3.39778	11480	1.16085e-05	11480	30.5467	11480	5.33741e-08	11480	0.000127236
11481	2.49914	11481	9.68899e-06	11481	54.3893	11481	1.28166e-07	11481	0.000316018
11482	1.12482	11482	3.80841e-06	11482	63.8106	11482	3.03964e-07	11482	0.000535221
11483	0.356774	11483	9.16433e-07	11483	49.9105	11483	6.83776e-07	11483	0.000615158
11484	0.0978821	11484	1.91213e-07	11484	27.1879	11484	1.29051e-06	11484	0.000506037
11485	0.0288996	11485	4.84266e-08	11485	10.9263	11485	1.74652e-06	11485	0.000322577
11486	0.0110841	11486	1.89313e-08	11486	3.47543	11486	1.53013e-06	11486	0.000173184
11487	0.0062707	11487	1.26591e-08	11487	0.9598	11487	8.92838e-07	11487	8.44155e-05
11488	0.00550904	11488	1.4149e-08	11488	0.260354	11488	4.16822e-07	11488	3.98069e-05
11489	0.00737368	11489	2.39251e-08	11489	0.0806428	11489	2.10179e-07	11489	1.92098e-05
11490	0.0140978	11490	5.43342e-08	11490	0.0333943	11490	1.59222e-07	11490	1.00745e-05
11491	0.0357224	11491	1.50325e-07	11491	0.0210605	11491	2.34391e-07	11491	6.20267e-06
11492	0.112773	11492	4.75852e-07	11492	0.0215477	11492	7.4616e-07	11492	4.94319e-06
11493	0.420432	11493	1.65308e-06	11493	0.0346019	11493	4.79665e-06	11493	5.63493e-06
11494	1.719	11494	5.99571e-06	11494	0.0764519	11494	5.02001e-05	11494	9.76921e-06
11495	6.82218	11495	2.08536e-05	11495	0.190239	11495	0.000632351	11495	2.51759e-05
11496	22.1415	11496	6.10615e-05	11496	0.42834	11496	0.006938	11496	8.46022e-05
11497	48.4868	11497	0.000127592	11497	0.721748	11497	0.0494178	11497	0.000295851
11498	60.2643	11498	0.00015938	11498	0.796063	11498	0.180739	11498	0.000817043
11499	37.682	11499	0.000101466	11499	0.533084	11499	0.288731	11499	0.00135969
11500	11.3016	11500	2.95969e-05	11500	0.210725	11500	0.18567	11500	0.00110182
11501	1.69341	11501	3.92829e-06	11501	0.0497073	11501	0.0485211	11501	0.000388785
11502	0.146892	11502	2.75896e-07	11502	0.00742048	11502	0.00580741	11502	6.14217e-05
11503	0.0096853	11503	1.47699e-08	11503	0.00080093	11503	0.000409219	11503	5.30336e-06
11504	0.00072148	11504	1.08972e-09	11504	7.90678e-05	11504	2.50901e-05	11504	3.67864e-07
11505	9.71045e-05	11505	2.2866e-10	11505	9.99206e-06	11505	2.20367e-06	11505	3.51902e-08
11506	3.60905e-05	11506	2.52727e-10	11506	2.36341e-06	11506	4.62388e-07	11506	8.35537e-09
11507	4.63374e-05	11507	1.82377e-09	11507	1.42122e-06	11507	3.36961e-07	11507	7.71751e-09
11508	0.000189456	11508	6.2538e-08	11508	2.40361e-06	11508	9.39403e-07	11508	3.13979e-08
11509	0.0017086	11509	5.03573e-06	11509	9.64027e-06	11509	8.01928e-06	11509	4.3098e-07
11510	0.0201024	11510	0.000425932	11510	6.18281e-05	11510	0.000132618	11510	1.14789e-05
11511	0.181117	11511	0.0192023	11511	0.000389453	11511	0.0024649	11511	0.000310612
11512	0.808989	11512	0.291507	11512	0.00154492	11512	0.0311937	11512	0.00479843
11513	1.34614	11513	1.17635	11513	0.00283254	11513	0.183031	11513	0.0278468
11514	0.742209	11514	1.21253	11514	0.0021037	11514	0.391504	11514	0.04808
11515	0.144182	11515	0.364612	11515	0.000668814	11515	0.278601	11515	0.0236459
11516	0.0126223	11516	0.0427771	11516	0.000114642	11516	0.0700161	11516	0.00385326
11517	0.000758448	11517	0.00301425	11517	1.5362e-05	11517	0.00769363	11517	0.000296664
11518	5.37948e-05	11518	0.000216833	11518	2.51054e-06	11518	0.000529098	11518	1.87143e-05
11519	7.77165e-06	11519	2.73559e-05	11519	7.59208e-07	11519	3.60486e-05	11519	1.91116e-06
11520	3.35691e-06	11520	9.20278e-06	11520	5.61818e-07	11520	3.85351e-06	11520	6.06502e-07
11521	4.7333e-06	11521	9.78906e-06	11521	1.09057e-06	11521	8.88767e-07	11521	8.90457e-07
11522	1.74211e-05	11522	2.91227e-05	11522	4.81207e-06	11522	4.70415e-07	11522	5.91038e-06
11523	0.000109641	11523	0.000171256	11523	3.58557e-05	11523	4.6558e-07	11523	0.000115778
11524	0.000743349	11524	0.00128753	11524	0.000312438	11524	6.00212e-07	11524	0.00351698
11525	0.00373169	11525	0.00832229	11525	0.00222361	11525	7.03784e-07	11525	0.0871116
11526	0.0111033	11526	0.0348545	11526	0.00970189	11526	5.95552e-07	11526	1.0656
11527	0.0185482	11527	0.0814433	11527	0.0219852	11527	3.46275e-07	11527	4.72325
11528	0.0191536	11528	0.102358	11528	0.0255579	11528	1.56062e-07	11528	6.71327
11529	0.0149375	11529	0.0716358	11529	0.0176763	11529	6.84051e-08	11529	3.18304
11530	0.0111203	11530	0.029681	11530	0.00958342	11530	3.70297e-08	11530	0.596252
11531	0.00955956	11531	0.00770784	11531	0.00561634	11531	2.89253e-08	11531	0.0574047
11532	0.0103831	11532	0.00131691	11532	0.0045673	11532	3.30991e-08	11532	0.00390029
11533	0.0139693	11533	0.000157644	11533	0.00556739	11533	4.92712e-08	11533	0.000259813
11534	0.0212728	11534	1.48372e-05	11534	0.00903905	11534	7.89276e-08	11534	2.29392e-05
11535	0.0333103	11535	1.3403e-06	11535	0.0153918	11535	1.13948e-07	11535	3.43034e-06
11536	0.0512032	11536	1.54556e-07	11536	0.0217178	11536	1.34389e-07	11536	1.03227e-06
11537	0.0791645	11537	3.14206e-08	11537	0.0222873	11537	1.30843e-07	11537	6.84321e-07
11538	0.132526	11538	1.46433e-08	11538	0.0168082	11538	1.17027e-07	11538	9.98267e-07
11539	0.258268	11539	1.71385e-08	11539	0.0104844	11539	1.12341e-07	11539	2.88454e-06
11540	0.597459	11540	4.38372e-08	11540	0.00629605	11540	1.32954e-07	11540	1.33497e-05
11541	1.55173	11541	1.76034e-07	11541	0.00407699	11541	2.07114e-07	11541	7.35213e-05
11542	4.04994	11542	7.38752e-07	11542	0.0029787	11542	4.12854e-07	11542	0.000347058
11543	9.44806	11543	2.27053e-06	11543	0.00245914	11543	9.53392e-07	11543	0.00105213
11544	18.2717	11544	4.11131e-06	11544	0.00231446	11544	2.25597e-06	11544	0.00170292
11545	28.915	11545	4.1698e-06	11545	0.00260537	11545	4.9404e-06	11545	0.00141124
11546	38.6409	11546	2.60312e-06	11546	0.00376046	11546	9.41071e-06	11546	0.000663556
11547	44.8917	11547	1.20061e-06	11547	0.00720124	11547	1.51001e-05	11547	0.000218211
11548	44.3883	11548	5.03756e-07	11548	0.0174096	11548	1.98586e-05	11548	6.44433e-05
11549	34.2767	11549	2.34023e-07	11549	0.0468006	11549	2.0523e-05	11549	2.14465e-05
11550	18.4228	11550	1.44867e-07	11550	0.121518	11550	1.57901e-05	11550	9.58707e-06
11551	6.41055	11551	1.44604e-07	11551	0.281951	11551	8.698e-06	11551	6.61239e-06
11552	1.5058	11552	2.8e-07	11552	0.599132	11552	3.47528e-06	11552	7.96736e-06
11553	0.288332	11553	1.17393e-06	11553	1.2908	11553	1.10218e-06	11553	1.84057e-05
11554	0.0610136	11554	1.00079e-05	11554	3.1207	11554	3.25895e-07	11554	8.12665e-05
11555	0.0197662	11555	0.000131067	11555	8.64948	11555	1.08398e-07	11555	0.00058382
11556	0.0123382	11556	0.00171118	11556	25.2678	11556	4.71301e-08	11556	0.00500177
11557	0.0157309	11557	0.0143365	11557	67.4114	11557	2.84941e-08	11557	0.0352597
11558	0.0368978	11558	0.056486	11558	145.233	11558	2.317e-08	11558	0.149439
11559	0.130797	11559	0.0940027	11559	240.926	11559	2.31485e-08	11559	0.320909
11560	0.56499	11560	0.0728545	11560	315.816	11560	2.59184e-08	11560	0.348813
11561	2.44334	11561	0.0337708	11561	344.083	11561	3.08532e-08	11561	0.221493
11562	8.90634	11562	0.0128713	11562	317.453	11562	3.88365e-08	11562	0.10298
11563	23.5332	11563	0.00541448	11563	239.221	11563	5.27294e-08	11563	0.0441481
11564	39.736	11564	0.00306582	11564	137.971	11564	7.80531e-08	11564	0.020619
11565	39.2237	11565	0.00251355	11565	58.6515	11565	1.22957e-07	11565	0.0112397
11566	21.855	11566	0.00287765	11566	19.1352	11566	1.94012e-07	11566	0.00703885
11567	7.13262	11567	0.00416058	11567	5.48137	11567	2.85875e-07	11567	0.00481452
11568	1.54434	11568	0.00677033	11568	1.6818	11568	3.79529e-07	11568	0.00350037
11569	0.275288	11569	0.0112909	11569	0.672149	11569	4.69633e-07	11569	0.00278893
11570	0.0535941	11570	0.0181821	11570	0.392287	11570	6.01067e-07	11570	0.00263429
11571	0.0151282	11571	0.0271828	11571	0.327505	11571	9.05701e-07	11571	0.00317704
11572	0.00747463	11572	0.0358239	11572	0.333845	11572	1.74586e-06	11572	0.00489508
11573	0.00656399	11573	0.0377625	11573	0.324136	11573	4.2149e-06	11573	0.00857192
11574	0.00870336	11574	0.0273318	11574	0.230013	11574	1.11745e-05	11574	0.0136781
11575	0.0133816	11575	0.0113282	11575	0.0966731	11575	2.68775e-05	11575	0.0153873
11576	0.0185553	11576	0.00231317	11576	0.0217114	11576	4.92865e-05	11576	0.00997633
11577	0.0199738	11577	0.000223175	11577	0.00270518	11577	6.26949e-05	11577	0.00348211
11578	0.0164535	11578	1.17273e-05	11578	0.000227301	11578	5.59428e-05	11578	0.000731182
11579	0.0115079	11579	4.8767e-07	11579	1.82918e-05	11579	3.89522e-05	11579	0.000123789
11580	0.00810869	11580	2.87481e-08	11580	2.24551e-06	11580	2.49772e-05	11580	2.56921e-05
11581	0.00682964	11581	4.5995e-09	11581	6.7473e-07	11581	1.75181e-05	11581	9.95929e-06
11582	0.00764921	11582	3.15727e-09	11582	6.78494e-07	11582	1.51255e-05	11582	9.32435e-06
11583	0.0114022	11583	9.57854e-09	11583	2.29163e-06	11583	1.6278e-05	11583	2.04633e-05
11584	0.0203342	11584	8.37546e-08	11584	1.86729e-05	11584	1.94532e-05	11584	7.70388e-05
11585	0.0363974	11585	1.06761e-06	11585	0.000213535	11585	2.07016e-05	11585	0.000312134
11586	0.0544255	11586	1.01891e-05	11586	0.00195566	11586	1.50471e-05	11586	0.000862159
11587	0.0594509	11587	4.54489e-05	11587	0.00938693	11587	5.905e-06	11587	0.00116831
11588	0.045022	11588	7.64343e-05	11588	0.0191001	11588	1.08773e-06	11588	0.000668677
11589	0.0243758	11589	5.00292e-05	11589	0.0165625	11589	9.42115e-08	11589	0.000167793
11590	0.0103439	11590	1.62202e-05	11590	0.00738723	11590	4.55755e-09	11590	2.29079e-05
11591	0.0038896	11591	3.88377e-06	11591	0.00232533	11591	1.7459e-10	11591	2.48395e-06
11592	0.00147012	11592	1.1116e-06	11592	0.000752887	11592	8.63534e-12	11592	3.52625e-07
11593	0.000621263	11593	5.9648e-07	11593	0.000358238	11593	9.26485e-13	11593	1.10654e-07
11594	0.000313373	11594	7.97077e-07	11594	0.000322454	11594	3.1308e-13	11594	1.13056e-07
11595	0.000189411	11595	2.70636e-06	11595	0.000596988	11595	3.56673e-13	11595	4.12104e-07
11596	0.000128138	11596	1.82814e-05	11596	0.00205476	11596	1.05153e-12	11596	4.15078e-06
11597	8.50695e-05	11597	0.000162406	11597	0.0102707	11597	5.0264e-12	11597	6.97393e-05
11598	4.7017e-05	11598	0.00120416	11598	0.0539991	11598	2.40917e-11	11598	0.00109221
11599	1.8543e-05	11599	0.00501078	11599	0.215277	11599	8.12037e-11	11599	0.00950532
11600	4.72223e-06	11600	0.00877532	11600	0.493561	11600	1.60837e-10	11600	0.0313808
11601	7.67438e-07	11601	0.00551858	11601	0.53997	11601	1.8299e-10	11601	0.0312828
11602	8.74818e-08	11602	0.00122214	11602	0.263018	11602	1.29853e-10	11602	0.00872294
11603	8.52897e-09	11603	0.000108343	11603	0.0608676	11603	6.52388e-11	11603	0.000731368
11604	9.34265e-10	11604	5.06773e-06	11604	0.00817205	11604	2.61415e-11	11604	2.29851e-05
11605	1.53164e-10	11605	1.8654e-07	11605	0.000864694	11605	9.06712e-12	11605	3.88687e-07
11606	4.66927e-11	11606	8.54375e-09	11606	0.000101771	11606	2.84187e-12	11606	5.68813e-09
11607	2.84558e-11	11607	7.36283e-10	11607	1.76591e-05	11607	8.23785e-13	11607	1.22176e-10
11608	3.14764e-11	11608	1.55512e-10	11608	5.11656e-06	11608	2.26931e-13	11608	6.27835e-12
11609	5.0774e-11	11609	8.58963e-11	11609	2.3177e-06	11609	6.2389e-14	11609	1.09389e-12
11610	9.31095e-11	11610	1.11983e-10	11610	1.33551e-06	11610	1.85523e-14	11610	7.43923e-13
11611	1.59874e-10	11611	2.85466e-10	11611	7.63796e-07	11611	6.66471e-15	11611	1.82706e-12
11612	2.32065e-10	11612	1.15765e-09	11612	3.54289e-07	11612	3.25726e-15	11612	1.25253e-11
11613	2.76604e-10	11613	6.09084e-09	11613	1.19097e-07	11613	2.34871e-15	11613	1.64761e-10
11614	2.69548e-10	11614	3.37819e-08	11614	2.84047e-08	11614	2.48229e-15	11614	2.72522e-09
11615	2.11594e-10	11615	1.61336e-07	11615	5.08913e-09	11615	3.44672e-15	11615	3.80151e-08
11616	1.31674e-10	11616	5.69485e-07	11616	7.80997e-10	11616	5.3107e-15	11616	3.28367e-07
11617	6.70392e-11	11617	1.42359e-06	11617	1.26777e-10	11617	7.85208e-15	11617	1.48666e-06
11618	3.16867e-11	11618	2.79123e-06	11618	2.88615e-11	11618	1.0612e-14	11618	3.52007e-06
11619	1.72957e-11	11619	5.34372e-06	11619	1.24216e-11	11619	1.40313e-14	11619	5.04119e-06
11620	1.38068e-11	11620	1.267e-05	11620	1.25013e-11	11620	2.08741e-14	11620	5.52667e-06
11621	1.85264e-11	11621	4.22272e-05	11621	3.01441e-11	11621	3.97034e-14	11621	5.89157e-06
11622	3.99641e-11	11622	0.000184006	11622	1.429e-10	11622	1.00567e-13	11622	7.13542e-06
11623	1.10064e-10	11623	0.000806882	11623	9.26629e-10	11623	3.16284e-13	11623	1.00191e-05
11624	2.76269e-10	11624	0.0025011	11624	5.38971e-09	11624	1.06886e-12	11624	1.46286e-05
11625	4.53418e-10	11625	0.00399073	11625	1.91772e-08	11625	3.34453e-12	11625	1.85476e-05
11626	3.87857e-10	11626	0.00275057	11626	3.17002e-08	11626	8.89838e-12	11626	1.7207e-05
11627	1.65079e-10	11627	0.000845984	11627	2.15257e-08	11627	2.05029e-11	11627	1.06682e-05
11628	4.18464e-11	11628	0.000151055	11628	6.35596e-09	11628	4.60721e-11	11628	4.55824e-06
11629	9.46626e-12	11629	2.47502e-05	11629	1.03694e-09	11629	1.19344e-10	11629	1.55755e-06
11630	3.28616e-12	11630	6.34181e-06	11630	1.36479e-10	11630	4.04892e-10	11630	5.27982e-07
11631	2.86032e-12	11631	3.83821e-06	11631	2.19125e-11	11631	1.80803e-09	11631	2.16224e-07
11632	7.75285e-12	11632	6.09791e-06	11632	5.83538e-12	11632	9.18878e-09	11632	1.17868e-07
11633	5.54417e-11	11633	1.98878e-05	11633	2.83341e-12	11633	4.14737e-08	11633	8.26393e-08
11634	6.65148e-10	11634	8.42692e-05	11634	2.23303e-12	11634	1.28586e-07	11634	6.57903e-08
11635	7.93063e-09	11635	0.000295589	11635	2.29447e-12	11635	2.2955e-07	11635	5.23521e-08
11636	6.21295e-08	11636	0.000643453	11636	2.55189e-12	11636	2.2535e-07	11636	3.957e-08
11637	2.53406e-07	11637	0.000796006	11637	2.86123e-12	11637	1.3297e-07	11637	2.99959e-08
11638	5.03776e-07	11638	0.000593557	11638	3.38444e-12	11638	5.72172e-08	11638	2.59437e-08
11639	5.15421e-07	11639	0.000300184	11639	4.6937e-12	11639	2.3019e-08	11639	2.9328e-08
11640	3.09373e-07	11640	0.000114181	11640	8.37386e-12	11640	1.11122e-08	11640	4.66975e-08
11641	1.29719e-07	11641	3.45462e-05	11641	1.97478e-11	11641	7.86643e-09	11641	1.02212e-07
11642	4.57435e-08	11642	8.45677e-06	11642	5.84041e-11	11642	9.12124e-09	11642	2.72057e-07
11643	1.58652e-08	11643	1.69543e-06	11643	1.93881e-10	11643	1.72574e-08	11643	7.28125e-07
11644	5.92514e-09	11644	2.93093e-07	11644	6.36487e-10	11644	4.761e-08	11644	1.59001e-06
11645	2.42739e-09	11645	5.01046e-08	11645	1.8822e-09	11645	1.60577e-07	11645	2.39598e-06
11646	1.07892e-09	11646	1.09693e-08	11646	4.92882e-09	11646	5.5907e-07	11646	2.34596e-06
11647	5.3733e-10	11647	4.4751e-09	11647	1.23639e-08	11647	1.81665e-06	11647	1.65448e-06
11648	3.40454e-10	11648	5.07486e-09	11648	3.45087e-08	11648	5.41734e-06	11648	1.11259e-06
11649	3.35593e-10	11649	2.03252e-08	11649	1.23946e-07	11649	1.52028e-05	11649	1.05633e-06
11650	6.12574e-10	11650	2.58872e-07	11650	5.97885e-07	11650	3.97947e-05	11650	2.00569e-06
11651	2.11721e-09	11651	6.47197e-06	11651	3.42431e-06	11651	8.76142e-05	11651	8.57528e-06
11652	1.14776e-08	11652	0.000157516	11652	1.7759e-05	11652	0.00013279	11652	6.73467e-05
11653	6.90503e-08	11653	0.00187682	11653	6.0076e-05	11653	0.000109198	11653	0.000617314
11654	3.15304e-07	11654	0.00661999	11654	0.000100726	11654	4.03693e-05	11654	0.00391439
11655	8.11231e-07	11655	0.00538355	11655	7.27585e-05	11655	6.3174e-06	11655	0.0112435
11656	1.00622e-06	11656	0.00101183	11656	2.3288e-05	11656	4.67837e-07	11656	0.011569
11657	5.95809e-07	11657	5.49733e-05	11657	3.98414e-06	11657	2.16728e-08	11657	0.00412228
11658	1.87716e-07	11658	1.29069e-06	11658	4.95521e-07	11658	9.22482e-10	11658	0.000581463
11659	3.81549e-08	11659	2.21743e-08	11659	6.48353e-08	11659	5.25779e-11	11659	4.17419e-05
11660	6.43574e-09	11660	4.99636e-10	11660	1.2876e-08	11660	5.16698e-12	11660	2.10396e-06
11661	1.20949e-09	11661	2.58292e-11	11661	5.24316e-09	11661	9.53974e-13	11661	1.06863e-07
11662	3.46857e-10	11662	4.78973e-12	11662	5.24296e-09	11662	3.25543e-13	11662	8.0386e-09
11663	2.01795e-10	11663	4.09007e-12	11663	1.31603e-08	11663	2.04601e-13	11663	1.31728e-09
11664	2.84287e-10	11664	1.59095e-11	11664	7.18322e-08	11664	2.53345e-13	11664	6.49347e-10
11665	9.65893e-10	11665	2.1246e-10	11665	6.46345e-07	11665	6.69335e-13	11665	1.11965e-09
11666	6.45787e-09	11666	5.96395e-09	11666	6.76513e-06	11666	3.62483e-12	11666	6.01948e-09
11667	6.02611e-08	11667	1.97856e-07	11667	5.79954e-05	11667	3.14088e-11	11667	6.92848e-08
11668	5.39216e-07	11668	4.56133e-06	11668	0.000303462	11668	2.88126e-10	11668	1.01916e-06
11669	3.42157e-06	11669	4.9399e-05	11669	0.000795682	11669	1.81849e-09	11669	1.1741e-05
11670	1.30934e-05	11670	0.000204954	11670	0.000965508	11670	5.89352e-09	11670	7.57135e-05
11671	3.00332e-05	11671	0.00032347	11671	0.000565076	11671	9.21794e-09	11671	0.000240277
11672	4.65375e-05	11672	0.000229473	11672	0.000184706	11672	8.27773e-09	11672	0.0003996
11673	5.81451e-05	11673	9.7288e-05	11673	4.18372e-05	11673	5.94474e-09	11673	0.000420722
11674	6.78976e-05	11674	3.38191e-05	11674	8.27685e-06	11674	4.84213e-09	11674	0.00035022
11675	7.7707e-05	11675	1.24159e-05	11675	1.7322e-06	11675	5.57513e-09	11675	0.000272796
11676	8.10903e-05	11676	5.48349e-06	11676	4.3086e-07	11676	9.20456e-09	11676	0.00021344
11677	6.63669e-05	11677	2.95752e-06	11677	1.32818e-07	11677	1.86455e-08	11677	0.00016588
11678	3.66137e-05	11678	1.87975e-06	11678	5.06851e-08	11678	3.73789e-08	11678	0.000123169
11679	1.26211e-05	11679	1.38845e-06	11679	2.38542e-08	11679	6.28701e-08	11679	8.61657e-05
11680	2.85391e-06	11680	1.2427e-06	11680	1.4113e-08	11680	8.35987e-08	11680	5.86904e-05
11681	5.0936e-07	11681	1.46019e-06	11681	1.0959e-08	11681	9.19878e-08	11681	4.16795e-05
11682	9.61515e-08	11682	2.4143e-06	11682	1.1728e-08	11682	9.38854e-08	11682	3.32834e-05
11683	2.6683e-08	11683	5.67916e-06	11683	1.77888e-08	11683	1.01258e-07	11683	3.15705e-05
11684	1.41633e-08	11684	1.77518e-05	11684	3.75646e-08	11684	1.26932e-07	11684	3.61474e-05
11685	1.5907e-08	11685	6.445e-05	11685	1.02027e-07	11685	1.89633e-07	11685	4.85742e-05
11686	3.43247e-08	11686	0.000230543	11686	3.10435e-07	11686	3.21266e-07	11686	7.17914e-05
11687	1.11761e-07	11687	0.000697305	11687	8.90807e-07	11687	5.60524e-07	11687	0.000107478
11688	4.15085e-07	11688	0.00159684	11688	2.04444e-06	11688	9.13809e-07	11688	0.000151248
11689	1.40866e-06	11689	0.00261531	11689	3.34361e-06	11689	1.30966e-06	11689	0.000190607
11690	3.85598e-06	11690	0.00302757	11690	3.73965e-06	11690	1.62414e-06	11690	0.000210687
11691	8.11778e-06	11691	0.00251318	11691	2.94947e-06	11691	1.75612e-06	11691	0.000202247
11692	1.28908e-05	11692	0.00153173	11692	1.76852e-06	11692	1.64838e-06	11692	0.000164861
11693	1.49867e-05	11693	0.000705281	11693	8.74896e-07	11693	1.29053e-06	11693	0.000108897
11694	1.22053e-05	11694	0.00025637	11694	3.7886e-07	11694	7.87462e-07	11694	5.49573e-05
11695	6.75274e-06	11695	7.9556e-05	11695	1.47855e-07	11695	3.54331e-07	11695	2.04228e-05
11696	2.58438e-06	11696	2.39559e-05	11696	5.26815e-08	11696	1.18948e-07	11696	5.73086e-06
11697	7.44495e-07	11697	8.38007e-06	11697	1.74923e-08	11697	3.35191e-08	11697	1.36075e-06
11698	1.85743e-07	11698	4.21584e-06	11698	5.68413e-09	11698	9.88118e-09	11698	3.34162e-07
11699	4.73359e-08	11699	3.74916e-06	11699	1.9732e-09	11699	3.95477e-09	11699	1.09135e-07
11700	1.44047e-08	11700	6.79946e-06	11700	8.25934e-10	11700	2.62161e-09	11700	6.01173e-08
11701	5.934e-09	11701	2.58125e-05	11701	4.75154e-10	11701	3.01156e-09	11701	6.49093e-08
11702	3.60961e-09	11702	0.000182477	11702	4.15668e-10	11702	5.25474e-09	11702	1.38597e-07
11703	3.39146e-09	11703	0.001881	11703	5.69324e-10	11703	1.08553e-08	11703	5.07434e-07
11704	4.90406e-09	11704	0.0204873	11704	1.14455e-09	11704	2.03945e-08	11704	2.46311e-06
11705	1.02731e-08	11705	0.168317	11705	2.92388e-09	11705	2.88541e-08	11705	1.16643e-05
11706	2.77289e-08	11706	0.773664	11706	7.92759e-09	11706	2.87083e-08	11706	4.02472e-05
11707	8.24754e-08	11707	1.58701	11707	1.93214e-08	11707	2.1155e-08	11707	8.01387e-05
11708	2.30428e-07	11708	1.27312	11708	3.76805e-08	11708	1.32969e-08	11708	7.89722e-05
11709	5.38365e-07	11709	0.392624	11709	5.59842e-08	11709	8.5911e-09	11709	3.60871e-05
11710	1.02068e-06	11710	0.0529094	11710	6.49427e-08	11710	6.90057e-09	11710	7.91963e-06
11711	1.69568e-06	11711	0.00423909	11711	6.48303e-08	11711	8.10942e-09	11711	9.7688e-07
11712	2.91292e-06	11712	0.000331714	11712	6.51057e-08	11712	1.56191e-08	11712	9.16759e-08
11713	6.26099e-06	11713	4.68048e-05	11713	7.85321e-08	11713	5.13988e-08	11713	1.01846e-08
11714	1.90869e-05	11714	2.04621e-05	11714	1.30758e-07	11714	2.73263e-07	11714	2.21529e-09
11715	8.1424e-05	11715	3.47541e-05	11715	3.13977e-07	11715	1.98222e-06	11715	1.40668e-09
11716	0.000411734	11716	0.000184632	11716	1.00832e-06	11716	1.50136e-05	11716	2.91591e-09
11717	0.00189243	11717	0.00175296	11717	3.64513e-06	11717	8.65637e-05	11717	1.53812e-08
11718	0.00597952	11718	0.0153908	11718	1.19701e-05	11718	0.000282751	11718	1.2425e-07
11719	0.010442	11719	0.0727297	11719	2.9379e-05	11719	0.000423259	11719	8.7164e-07
11720	0.008967	11720	0.134811	11720	4.73165e-05	11720	0.000265344	11720	3.36391e-06
11721	0.00375184	11721	0.0908471	11721	4.77499e-05	11721	7.25675e-05	11721	5.49232e-06
11722	0.000830368	11722	0.025363	11722	3.11627e-05	11722	1.01138e-05	11722	3.58201e-06
11723	0.000112736	11723	0.00387564	11723	1.43396e-05	11723	9.12279e-07	11723	1.05572e-06
11724	1.13479e-05	11724	0.000460476	11724	5.21175e-06	11724	7.12522e-08	11724	1.83984e-07
11725	1.0492e-06	11725	5.98726e-05	11725	1.68655e-06	11725	6.64506e-09	11725	2.75892e-08
11726	1.1233e-07	11726	1.11135e-05	11726	5.47094e-07	11726	1.03415e-09	11726	5.48217e-09
11727	1.77441e-08	11727	3.46477e-06	11727	2.00491e-07	11727	3.67462e-10	11727	2.18926e-09
11728	5.20788e-09	11728	1.95877e-06	11728	9.36722e-08	11728	3.72534e-10	11728	2.38681e-09
11729	3.36991e-09	11729	2.06902e-06	11729	6.22919e-08	11729	1.13011e-09	11729	7.90397e-09
11730	5.07711e-09	11730	4.12106e-06	11730	6.35885e-08	11730	8.65097e-09	11730	6.9863e-08
11731	1.62342e-08	11731	1.51686e-05	11731	1.01281e-07	11731	1.17994e-07	11731	1.1945e-06
11732	8.82109e-08	11732	9.46426e-05	11732	2.37636e-07	11732	1.8802e-06	11732	2.60182e-05
11733	6.04627e-07	11733	0.000831001	11733	7.22983e-07	11733	2.37464e-05	11733	0.000476949
11734	3.83688e-06	11734	0.00774232	11734	2.40338e-06	11734	0.000179326	11734	0.00521677
11735	1.73126e-05	11735	0.0552051	11735	7.37751e-06	11735	0.000701587	11735	0.0268608
11736	4.65908e-05	11736	0.225151	11736	1.86749e-05	11736	0.00142383	11736	0.0582287
11737	7.02553e-05	11737	0.438438	11737	3.80717e-05	11737	0.00171333	11737	0.0543464
11738	6.25682e-05	11738	0.397233	11738	6.63432e-05	11738	0.00154163	11738	0.0254036
11739	3.78697e-05	11739	0.190962	11739	0.00010798	11739	0.00135773	11739	0.00764226
11740	1.85684e-05	11740	0.0625366	11740	0.000170766	11740	0.00147244	11740	0.00198091
11741	8.60048e-06	11741	0.0188187	11741	0.000246785	11741	0.00223729	11741	0.000572877
11742	4.16054e-06	11742	0.00683595	11742	0.000282409	11742	0.00484522	11742	0.000218655
11743	2.23374e-06	11743	0.00363637	11743	0.000223179	11743	0.0141627	11743	0.000117962
11744	1.42024e-06	11744	0.00313111	11744	0.000119232	11744	0.0522067	11744	9.06063e-05
11745	1.18382e-06	11745	0.00446625	11745	5.06368e-05	11745	0.231688	11745	9.85478e-05
11746	1.46048e-06	11746	0.0101752	11746	2.36413e-05	11746	1.20083	11746	0.000151791
11747	2.86524e-06	11747	0.03362	11747	1.74439e-05	11747	6.93562	11747	0.000324761
11748	8.45121e-06	11748	0.136218	11748	2.542e-05	11748	40.6101	11748	0.000887238
11749	3.03393e-05	11749	0.53343	11749	6.99176e-05	11749	207.63	11749	0.00259456
11750	9.66598e-05	11750	1.52996	11750	0.00026817	11750	772.368	11750	0.00631262
11751	0.000198523	11751	2.48224	11751	0.000935778	11751	1752.68	11751	0.00973952
11752	0.000210088	11752	1.91976	11752	0.00200757	11752	2134.14	11752	0.00762823
11753	0.000107242	11753	0.689604	11753	0.00206401	11753	1329.92	11753	0.00269311
11754	2.93626e-05	11754	0.133454	11754	0.000949756	11754	446.219	11754	0.000433445
11755	5.50402e-06	11755	0.0188634	11755	0.000215892	11755	93.1778	11755	3.64959e-05
11756	9.59867e-07	11756	0.0028487	11756	3.0274e-05	11756	14.9504	11756	2.03341e-06
11757	2.05233e-07	11757	0.000637869	11757	3.49836e-06	11757	2.31677	11757	1.00207e-07
11758	6.41708e-08	11758	0.000247911	11758	4.51745e-07	11758	0.42203	11758	5.94984e-09
11759	3.14335e-08	11759	0.00016039	11759	8.66358e-08	11759	0.103581	11759	5.81737e-10
11760	2.43746e-08	11760	0.000146995	11760	3.15762e-08	11760	0.037196	11760	1.28048e-10
11761	3.01384e-08	11761	0.000163173	11761	2.6447e-08	11761	0.0206216	11761	8.44867e-11
11762	6.01928e-08	11762	0.000203805	11762	5.59246e-08	11762	0.018339	11762	1.99442e-10
11763	1.88946e-07	11763	0.00028611	11763	2.83053e-07	11763	0.026333	11763	1.60842e-09
11764	8.22268e-07	11764	0.000449679	11764	2.73856e-06	11764	0.057744	11764	3.19796e-08
11765	3.91039e-06	11765	0.000726618	11765	3.53632e-05	11765	0.170148	11765	9.12414e-07
11766	1.50566e-05	11766	0.000998253	11766	0.000406371	11766	0.568116	11766	2.0453e-05
11767	3.5773e-05	11767	0.000911806	11767	0.00291197	11767	1.83346	11767	0.000216153
11768	4.46961e-05	11768	0.000448492	11768	0.0102327	11768	5.1568	11768	0.000778269
11769	2.92537e-05	11769	0.000108756	11769	0.0159566	11769	12.1925	11769	0.000860544
11770	1.16313e-05	11770	1.41862e-05	11770	0.0114235	11770	24.5471	11770	0.000328148
11771	3.62587e-06	11771	1.30395e-06	11771	0.0043324	11771	43.4586	11771	5.89559e-05
11772	1.18575e-06	11772	1.2715e-07	11772	0.00108206	11772	69.7672	11772	7.87195e-06
11773	5.22611e-07	11773	2.06351e-08	11773	0.000228839	11773	104.195	11773	1.29295e-06
11774	3.60238e-07	11774	7.94882e-09	11774	5.20748e-05	11774	148.833	11774	3.96138e-07
11775	3.95072e-07	11775	8.32851e-09	11775	1.52928e-05	11775	210.49	11775	2.76579e-07
11776	6.19759e-07	11776	2.09825e-08	11776	6.3287e-06	11776	305.135	11776	4.12903e-07
11777	1.15337e-06	11777	9.29588e-08	11777	3.63392e-06	11777	461.38	11777	1.01685e-06
11778	2.07583e-06	11778	5.00861e-07	11778	2.64166e-06	11778	714.958	11778	3.00859e-06
11779	3.08148e-06	11779	2.41877e-06	11779	2.17771e-06	11779	1069.98	11779	8.32806e-06
11780	3.51256e-06	11780	8.73893e-06	11780	1.90788e-06	11780	1412.78	11780	1.90453e-05
11781	3.16682e-06	11781	2.24002e-05	11781	1.81301e-06	11781	1494.24	11781	3.5731e-05
11782	2.52565e-06	11782	4.23413e-05	11782	2.06627e-06	11782	1175.93	11782	5.84174e-05
11783	2.0624e-06	11783	6.3617e-05	11783	3.20297e-06	11783	669.035	11783	8.89208e-05
11784	1.93741e-06	11784	8.0345e-05	11784	7.23469e-06	11784	281.972	11784	0.000129088
11785	2.16659e-06	11785	8.55034e-05	11785	2.25841e-05	11785	94.5198	11785	0.000172531
11786	2.71744e-06	11786	7.31293e-05	11786	8.13782e-05	11786	27.8864	11786	0.000196534
11787	3.41251e-06	11787	4.76582e-05	11787	0.000264675	11787	8.10668	11787	0.000177017
11788	3.90135e-06	11788	2.38576e-05	11788	0.000625099	11788	2.59474	11788	0.000123772
11789	4.02503e-06	11789	1.04501e-05	11789	0.00096312	11789	1.01371	11789	7.30895e-05
11790	4.16488e-06	11790	5.24826e-06	11790	0.00100785	11790	0.529332	11790	4.46517e-05
11791	5.20848e-06	11791	4.29851e-06	11791	0.00084532	11791	0.394448	11791	3.75573e-05
11792	9.38147e-06	11792	7.7161e-06	11792	0.00070282	11792	0.425135	11792	5.70443e-05
11793	2.56511e-05	11793	3.28233e-05	11793	0.000673804	11793	0.617781	11793	0.000177315
11794	9.2776e-05	11794	0.000266949	11794	0.000747355	11794	1.02305	11794	0.00100613
11795	0.000327244	11795	0.00268564	11795	0.000817371	11795	1.51292	11795	0.00739697
11796	0.00077745	11796	0.0205338	11796	0.000681663	11796	1.53721	11796	0.0444018
11797	0.000912274	11797	0.0818236	11797	0.00033932	11797	0.87083	11797	0.139976
11798	0.000453489	11798	0.142721	11798	8.83705e-05	11798	0.249987	11798	0.169491
11799	0.000100336	11799	0.114384	11799	1.25401e-05	11799	0.0382148	11799	0.0695327
11800	1.26237e-05	11800	0.053381	11800	1.20811e-06	11800	0.00376946	11800	0.0104869
11801	1.31927e-06	11801	0.020545	11801	1.12534e-07	11801	0.000323181	11801	0.000768531
11802	1.71118e-07	11802	0.00927505	11802	1.50511e-08	11802	3.38362e-05	11802	4.22271e-05
11803	3.69442e-08	11803	0.00629196	11803	3.98378e-09	11803	5.87076e-06	11803	2.88159e-06
11804	1.46226e-08	11804	0.00691224	11804	2.41898e-09	11804	2.06497e-06	11804	3.85414e-07
11805	9.64883e-09	11805	0.0111566	11805	3.17308e-09	11805	1.55611e-06	11805	1.3482e-07
11806	8.74221e-09	11806	0.0214275	11806	7.19282e-09	11806	2.28285e-06	11806	1.30314e-07
11807	9.11612e-09	11807	0.0382643	11807	2.10501e-08	11807	5.26488e-06	11807	2.95978e-07
11808	1.0073e-08	11808	0.050988	11808	6.09682e-08	11808	1.45358e-05	11808	1.16743e-06
11809	1.20274e-08	11809	0.0433437	11809	1.45603e-07	11809	3.68396e-05	11809	5.61489e-06
11810	1.66444e-08	11810	0.0217319	11810	2.62781e-07	11810	6.97749e-05	11810	2.35213e-05
11811	2.77815e-08	11811	0.00643267	11811	3.52794e-07	11811	8.80289e-05	11811	6.50344e-05
11812	5.2903e-08	11812	0.00120971	11812	3.5753e-07	11812	7.28983e-05	11812	9.78872e-05
11813	9.78529e-08	11813	0.00016572	11813	2.76917e-07	11813	4.29745e-05	11813	7.3509e-05
11814	1.42995e-07	11814	2.01107e-05	11814	1.65651e-07	11814	2.12321e-05	11814	2.86818e-05
11815	1.42803e-07	11815	2.79169e-06	11815	8.06083e-08	11815	1.0973e-05	11815	7.02692e-06
11816	1.00043e-07	11816	6.04308e-07	11816	3.74072e-08	11816	7.54651e-06	11816	1.52053e-06
11817	6.35047e-08	11817	2.8221e-07	11817	2.24082e-08	11817	8.45672e-06	11817	4.5501e-07
11818	5.67329e-08	11818	3.6466e-07	11818	2.56883e-08	11818	1.71092e-05	11818	2.92294e-07
11819	1.12041e-07	11819	1.38208e-06	11819	7.80064e-08	11819	6.03785e-05	11819	5.266e-07
11820	6.12065e-07	11820	1.26038e-05	11820	6.70811e-07	11820	0.000316831	11820	2.58571e-06
11821	7.96772e-06	11821	0.00018279	11821	1.24433e-05	11821	0.00196417	11821	2.517e-05
11822	0.000156164	11822	0.00254268	11822	0.000297388	11822	0.0113751	11822	0.000301275
11823	0.00264008	11823	0.021317	11823	0.00521812	11823	0.0506747	11823	0.00275356
11824	0.0244766	11824	0.0767479	11824	0.0432739	11824	0.15167	11824	0.0133065
11825	0.0971612	11825	0.0989338	11825	0.133705	11825	0.283896	11825	0.0272889
11826	0.159683	11826	0.0445311	11826	0.149539	11826	0.332095	11826	0.021992
11827	0.124426	11827	0.00788088	11827	0.0702262	11827	0.263651	11827	0.00729194
11828	0.0580011	11828	0.000698706	11828	0.0182507	11828	0.168201	11828	0.00115177
11829	0.0206797	11829	4.32825e-05	11829	0.00369185	11829	0.108576	11829	0.000108445
11830	0.00678788	11830	2.71529e-06	11830	0.000812058	11830	0.0894403	11830	8.01112e-06
11831	0.00224576	11831	2.43387e-07	11831	0.000251909	11831	0.110069	11831	6.21973e-07
11832	0.000759736	11832	4.03804e-08	11832	0.000126974	11832	0.207981	11832	6.67788e-08
11833	0.000260191	11833	1.43252e-08	11833	0.000105211	11833	0.541095	11833	1.24089e-08
11834	9.1224e-05	11834	1.1241e-08	11834	0.000129128	11834	1.58422	11834	4.63277e-09
11835	3.42004e-05	11835	1.84614e-08	11835	0.0001939	11835	4.17063	11835	3.67833e-09
11836	1.44922e-05	11836	5.6079e-08	11836	0.000281401	11836	8.26016	11836	5.95386e-09
11837	7.21846e-06	11837	2.64297e-07	11837	0.00031567	11837	11.3155	11837	1.71978e-08
11838	4.2603e-06	11838	1.56385e-06	11838	0.000235597	11838	11.0188	11838	7.26116e-08
11839	2.91492e-06	11839	9.25835e-06	11839	0.000113263	11839	8.60253	11839	3.55424e-07
11840	2.21709e-06	11840	4.42606e-05	11840	3.8606e-05	11840	6.34224	11840	1.60803e-06
11841	1.78849e-06	11841	0.00014469	11841	1.13903e-05	11841	5.10466	11841	5.5987e-06
11842	1.48671e-06	11842	0.000298589	11842	3.75412e-06	11842	4.86404	11842	1.35426e-05
11843	1.29558e-06	11843	0.000402605	11843	1.78431e-06	11843	5.54368	11843	2.29065e-05
11844	1.27783e-06	11844	0.00041119	11844	1.49893e-06	11844	7.31233	11844	3.04218e-05
11845	1.59509e-06	11845	0.000394781	11845	2.47352e-06	11845	10.7096	11845	3.80554e-05
11846	2.73471e-06	11846	0.000435094	11846	7.82189e-06	11846	16.8294	11846	5.28192e-05
11847	6.30112e-06	11847	0.000605827	11847	4.05156e-05	11847	27.3854	11847	8.60252e-05
11848	1.67164e-05	11848	0.00101721	11848	0.000268498	11848	43.7976	11848	0.000149829
11849	4.00125e-05	11849	0.00177455	11849	0.00175127	11849	64.2633	11849	0.000227537
11850	6.81284e-05	11850	0.00275166	11850	0.00918411	11850	81.3287	11850	0.000241305
11851	7.18205e-05	11851	0.00352709	11851	0.0350337	11851	86.9435	11851	0.000154493
11852	4.71275e-05	11852	0.00391428	11852	0.0967373	11852	81.5537	11852	5.87446e-05
11853	2.19867e-05	11853	0.0042882	11853	0.202397	11853	72.7641	11853	1.48721e-05
11854	8.89353e-06	11854	0.0053243	11854	0.33554	11854	66.8104	11854	3.09225e-06
11855	3.77754e-06	11855	0.0080555	11855	0.449152	11855	65.2717	11855	6.82704e-07
11856	1.9368e-06	11856	0.014609	11856	0.488192	11856	66.4901	11856	2.07195e-07
11857	1.30287e-06	11857	0.0294955	11857	0.440976	11857	67.8783	11857	1.07637e-07
11858	1.2044e-06	11858	0.0611788	11858	0.350127	11858	68.7549	11858	1.09979e-07
11859	1.55535e-06	11859	0.122997	11859	0.261646	11859	72.043	11859	2.24881e-07
11860	2.71258e-06	11860	0.229609	11860	0.190042	11860	83.4633	11860	8.12098e-07
11861	5.72203e-06	11861	0.378066	11861	0.127973	11861	110.252	11861	4.05458e-06
11862	1.21928e-05	11862	0.511692	11862	0.070326	11862	157.145	11862	2.07209e-05
11863	2.15756e-05	11863	0.529619	11863	0.0270401	11863	209.941	11863	8.19973e-05
11864	2.77139e-05	11864	0.404016	11864	0.00662042	11864	221.493	11864	0.00020618
11865	2.54829e-05	11865	0.234521	11865	0.00107509	11865	162.986	11865	0.000302181
11866	1.88943e-05	11866	0.115644	11866	0.000141773	11866	82.2149	11866	0.000266311
11867	1.39453e-05	11867	0.0570787	11867	2.09484e-05	11867	31.6111	11867	0.000162405
11868	1.27709e-05	11868	0.033292	11868	4.85447e-06	11868	11.2948	11868	8.61463e-05
11869	1.66866e-05	11869	0.0255826	11869	2.20647e-06	11869	4.69061	11869	5.22846e-05
11870	3.11725e-05	11870	0.0262411	11870	2.02682e-06	11870	2.6969	11870	4.64845e-05
11871	7.30107e-05	11871	0.0331547	11871	3.22984e-06	11871	2.31648	11871	6.90734e-05
11872	0.000174144	11872	0.0450526	11872	6.95653e-06	11872	2.88751	11872	0.000164024
11873	0.000342188	11873	0.0571705	11873	1.57632e-05	11873	4.71661	11873	0.000501975
11874	0.000470767	11874	0.060653	11874	3.08758e-05	11874	8.88361	11874	0.0014518
11875	0.000413936	11875	0.0502219	11875	4.57098e-05	11875	17.2186	11875	0.00292973
11876	0.000227811	11876	0.0312867	11876	4.69248e-05	11876	31.8138	11876	0.00332677
11877	8.16597e-05	11877	0.0143505	11877	3.18855e-05	11877	54.2576	11877	0.00194736
11878	2.09654e-05	11878	0.00478073	11878	1.44009e-05	11878	86.1705	11878	0.00061293
11879	4.49075e-06	11879	0.00116797	11879	4.69181e-06	11879	132.722	11879	0.000121043
11880	9.91082e-07	11880	0.000224506	11880	1.32622e-06	11880	210.215	11880	1.91324e-05
11881	2.89201e-07	11881	4.03611e-05	11881	4.32301e-07	11881	362.542	11881	3.28841e-06
11882	1.40482e-07	11882	9.05762e-06	11882	2.26141e-07	11882	702.523	11882	8.53448e-07
11883	1.2888e-07	11883	3.61747e-06	11883	2.48987e-07	11883	1503.5	11883	4.42739e-07
11884	2.13447e-07	11884	3.47337e-06	11884	6.36339e-07	11884	3295.91	11884	5.29908e-07
11885	5.14622e-07	11885	8.92273e-06	11885	3.31939e-06	11885	6561.45	11885	1.37929e-06
11886	1.32775e-06	11886	5.2453e-05	11886	2.59373e-05	11886	10406.4	11886	6.0397e-06
11887	2.73843e-06	11887	0.000489361	11887	0.000207998	11887	11909	11887	3.05765e-05
11888	3.72771e-06	11888	0.00466638	11888	0.00122176	11888	9499.05	11888	0.000121905
11889	3.15305e-06	11889	0.0309865	11889	0.00416207	11889	5491.65	11889	0.000282843
11890	1.74907e-06	11890	0.111101	11890	0.00732794	11890	2536.2	11890	0.000322345
11891	7.21178e-07	11891	0.193367	11891	0.00659962	11891	1060.23	11891	0.000177384
11892	2.57349e-07	11892	0.168533	11892	0.00327349	11892	454.019	11892	5.39309e-05
11893	9.24745e-08	11893	0.0852094	11893	0.00102852	11893	221.55	11893	1.18359e-05
11894	3.86388e-08	11894	0.0315385	11894	0.000247514	11894	134.173	11894	2.66574e-06
11895	2.15996e-08	11895	0.0112348	11895	5.68982e-05	11895	107.145	11895	8.75457e-07
11896	1.84841e-08	11896	0.00496727	11896	1.56636e-05	11896	115.503	11896	5.35612e-07
11897	2.70238e-08	11897	0.00324	11897	6.31042e-06	11897	163.035	11897	6.49035e-07
11898	7.10556e-08	11898	0.00328827	11898	4.3074e-06	11898	275.125	11898	1.37907e-06
11899	3.24459e-07	11899	0.00489931	11899	5.36259e-06	11899	484.865	11899	4.10803e-06
11900	2.27774e-06	11900	0.00952906	11900	1.21228e-05	11900	773.552	11900	1.3831e-05
11901	2.06235e-05	11901	0.0216817	11901	4.61262e-05	11901	1002.04	11901	4.63106e-05
11902	0.000201308	11902	0.0545174	11902	0.000258935	11902	1007.2	11902	0.000150866
11903	0.00183701	11903	0.150893	11903	0.00181506	11903	804.994	11903	0.000501053
11904	0.0142897	11904	0.463636	11904	0.0132793	11904	552.886	11904	0.00178046
11905	0.0896237	11905	1.52992	11905	0.0854489	11905	360.699	11905	0.00669247
11906	0.433044	11906	4.87441	11906	0.417448	11906	245.002	11906	0.0241769
11907	1.52306	11907	12.667	11907	1.38267	11907	184.71	11907	0.0715908
11908	3.63258	11908	22.3174	11908	2.8817	11908	159.672	11908	0.146537
11909	5.49682	11909	23.0458	11909	3.6512	11909	159.514	11909	0.182806
11910	5.11877	11910	13.0649	11910	2.83234	11910	182.592	11910	0.133099
11911	3.04234	11911	4.19256	11911	1.41621	11911	234.335	11911	0.0594559
11912	1.29752	11912	0.856928	11912	0.504769	11912	325.196	11912	0.0184874
11913	0.476703	11913	0.133372	11913	0.149672	11913	463.609	11913	0.0047219
11914	0.184988	11914	0.0193906	11914	0.0454559	11914	639.151	11914	0.00116615
11915	0.0895632	11915	0.00320738	11915	0.0180979	11915	806.11	11915	0.00031809
11916	0.0588003	11916	0.000711715	11916	0.0120843	11916	900.404	11916	0.000105909
11917	0.0517231	11917	0.000237306	11917	0.016209	11917	893.9	11917	4.66685e-05
11918	0.0560946	11918	0.000124415	11918	0.0456728	11918	819.499	11918	2.91781e-05
11919	0.0672165	11919	9.9232e-05	11919	0.238523	11919	732.592	11919	2.70062e-05
11920	0.0812869	11920	0.000108522	11920	1.77154	11920	666.747	11920	3.62932e-05
11921	0.0953052	11921	0.000141016	11921	13.5672	11921	624.461	11921	6.35922e-05
11922	0.110244	11922	0.000189743	11922	80.4552	11922	587.843	11922	0.000120393
11923	0.13277	11923	0.000240286	11923	305.345	11923	533.705	11923	0.000196952
11924	0.174444	11924	0.000274586	11924	686.289	11924	449.936	11924	0.000228153
11925	0.249066	11925	0.0002822	11925	930.574	11925	343.855	11925	0.00016516
11926	0.36013	11926	0.000262899	11926	826.793	11926	235.079	11926	7.28099e-05
11927	0.472038	11927	0.000221188	11927	540.011	11927	142.468	11927	2.10202e-05
11928	0.509294	11928	0.000164408	11928	292.991	11928	76.3799	11928	4.61167e-06
11929	0.437803	11929	0.000104718	11929	146.995	11929	36.9136	11929	9.27248e-07
11930	0.313931	11930	5.59963e-05	11930	72.9822	11930	16.946	11930	2.04909e-07
11931	0.206718	11931	2.53424e-05	11931	36.0714	11931	8.01207	11931	5.71439e-08
11932	0.137393	11932	1.02025e-05	11932	16.6803	11932	4.24081	11932	2.17e-08
11933	0.0971885	11933	4.02095e-06	11933	6.50024	11933	2.65114	11933	1.14454e-08
11934	0.0739481	11934	1.77246e-06	11934	1.94888	11934	1.97111	11934	8.26987e-09
11935	0.0606526	11935	1.01118e-06	11935	0.443683	11935	1.6899	11935	7.98815e-09
11936	0.0552097	11936	8.41742e-07	11936	0.0851107	11936	1.59587	11936	1.00569e-08
11937	0.0590648	11937	1.07976e-06	11937	0.0169243	11937	1.58847	11937	1.59997e-08
11938	0.0777687	11938	2.07011e-06	11938	0.00443214	11938	1.59839	11938	3.07485e-08
11939	0.123999	11939	5.3539e-06	11939	0.00182343	11939	1.55345	11939	6.73129e-08
11940	0.217016	11940	1.6328e-05	11940	0.00123972	11940	1.39351	11940	1.5825e-07
11941	0.358796	11941	5.18864e-05	11941	0.00130202	11941	1.1259	11941	3.83706e-07
11942	0.485871	11942	0.000156807	11942	0.00186653	11942	0.8369	11942	9.48371e-07
11943	0.494128	11943	0.000421156	11943	0.00324685	11943	0.615922	11943	2.41015e-06
11944	0.370785	11944	0.000935024	11944	0.00626571	11944	0.496472	11944	6.31343e-06
11945	0.212287	11945	0.00155119	11945	0.0124186	11945	0.475361	11945	1.64474e-05
11946	0.0983977	11946	0.00169355	11946	0.0232306	11946	0.551014	11946	3.88717e-05
11947	0.0397487	11947	0.00108056	11947	0.0375514	11947	0.732475	11947	7.27157e-05
11948	0.0153844	11948	0.000380646	11948	0.0491844	11948	1.00831	11948	9.37103e-05
11949	0.00646935	11949	7.83153e-05	11949	0.0516428	11949	1.29231	11949	7.66806e-05
11950	0.00344069	11950	1.14666e-05	11950	0.0458725	11950	1.43477	11950	4.12126e-05
11951	0.00269462	11951	1.65872e-06	11951	0.0382904	11951	1.35629	11951	1.75233e-05
11952	0.00348225	11952	3.52948e-07	11952	0.0341005	11952	1.13395	11952	8.20871e-06
11953	0.00772217	11953	1.58525e-07	11953	0.0363126	11953	0.904056	11953	6.33939e-06
11954	0.0277202	11954	1.84329e-07	11954	0.0494345	11954	0.744136	11954	1.12836e-05
11955	0.137654	11955	5.38644e-07	11955	0.0853932	11955	0.661427	11955	5.19442e-05
11956	0.750924	11956	3.06802e-06	11956	0.170913	11956	0.625244	11956	0.00052014
11957	3.48767	11957	2.30262e-05	11957	0.340026	11957	0.586718	11957	0.007626
11958	11.0488	11958	0.000150448	11958	0.568886	11958	0.504432	11958	0.102542
11959	20.6885	11959	0.00060614	11959	0.706356	11959	0.383786	11959	0.847675
11960	21.869	11960	0.00120243	11960	0.622538	11960	0.270593	11960	3.32146
11961	13.6181	11961	0.00107172	11961	0.406306	11961	0.198239	11961	5.50076
11962	5.55201	11962	0.000444065	11962	0.218568	11962	0.170929	11962	3.84856
11963	1.71049	11963	9.87605e-05	11963	0.11109	11963	0.185291	11963	1.22782
11964	0.471373	11964	1.49225e-05	11964	0.0610348	11964	0.246359	11964	0.203714
11965	0.140714	11965	2.08313e-06	11965	0.0405645	11965	0.367744	11965	0.0212035
11966	0.0558434	11966	3.80949e-07	11966	0.0352417	11966	0.564218	11966	0.00179358
11967	0.0354265	11967	1.28425e-07	11967	0.041289	11967	0.860331	11967	0.000172652
11968	0.0401081	11968	1.03823e-07	11968	0.0637209	11968	1.34611	11968	2.77991e-05
11969	0.080419	11969	2.24603e-07	11969	0.12029	11969	2.30098	11969	1.06864e-05
11970	0.251669	11970	1.19284e-06	11970	0.250249	11970	4.4613	11970	1.22323e-05
11971	1.00502	11971	1.19443e-05	11971	0.515753	11971	9.52043	11971	4.19182e-05
11972	4.11564	11972	0.000155764	11972	0.964362	11972	20.1501	11972	0.000345888
11973	14.1986	11973	0.00179458	11973	1.53333	11973	36.4544	11973	0.00472115
11974	35.0754	11974	0.0130513	11974	1.97411	11974	48.722	11974	0.0687396
11975	54.5365	11975	0.0470379	11975	1.97794	11975	43.5991	11975	0.700435
11976	48.8618	11976	0.0741641	11976	1.50342	11976	25.5552	11976	3.51518
11977	24.6105	11977	0.0514737	11977	0.871943	11977	10.4468	11977	6.76822
11978	7.46077	11978	0.0181441	11978	0.4082	11978	3.40837	11978	4.39051
11979	1.62437	11979	0.00425542	11979	0.172708	11979	1.05882	11979	0.958401
11980	0.331145	11980	0.000950571	11980	0.0768941	11980	0.37381	11980	0.0800253
11981	0.0844585	11981	0.000293653	11981	0.0418757	11981	0.171854	11981	0.00328318
11982	0.0337097	11982	0.000167908	11982	0.0308315	11982	0.109885	11982	9.47794e-05
11983	0.0229473	11983	0.000203113	11983	0.0312522	11983	0.0964506	11983	3.01413e-06
11984	0.0251007	11984	0.000500379	11984	0.0410723	11984	0.107652	11984	1.74891e-07
11985	0.038148	11985	0.00214727	11985	0.0631868	11985	0.13758	11985	3.03921e-08
11986	0.069575	11986	0.0132025	11986	0.103122	11986	0.183984	11986	2.29408e-08
11987	0.139055	11987	0.0970239	11987	0.167423	11987	0.247083	11987	8.39226e-08
11988	0.295377	11988	0.72644	11988	0.263439	11988	0.339326	11988	1.18073e-06
11989	0.662377	11989	4.73095	11989	0.400098	11989	0.504653	11989	3.80479e-05
11990	1.52432	11990	22.5623	11990	0.584961	11990	0.858195	11990	0.00147418
11991	3.33807	11991	65.9665	11991	0.811734	11991	1.68266	11991	0.0376921
11992	6.1804	11992	101.398	11992	1.03738	11992	3.5842	11992	0.405496
11993	8.44639	11993	74.5709	11993	1.16364	11993	7.37359	11993	1.40375
11994	7.5391	11994	26.0427	11994	1.07107	11994	12.7082	11994	1.41875
11995	4.06173	11995	4.7446	11995	0.747225	11995	16.1835	11995	0.441259
11996	1.31597	11996	0.550353	11996	0.370252	11996	14.1496	11996	0.0510889
11997	0.285167	11997	0.0547674	11997	0.129872	11997	8.51767	11997	0.00305297
[truncated: 38,003 more rows]
