# Supplementary material for: A moonlighting function of a chitin polysaccharide monooxygenase, CWR-1, in Neurospora crassa allorecognition
Source: eLife. 2022 Aug 30;11:e80459. doi: 10.7554/eLife.80459 (PMC9550227; doi:10.7554/eLife.80459)
Supplement: Figure 5—figure supplement 2—source data 1. — Measured raw data in xy format from the EPR experiment as described in ‘Materials and methods’. [file elife-80459-fig5-figsupp2-data1.xlsx]

## Sheet: Sheet1
HG1_40k_27dB			HG1H78A_40k_27dB
X ( gauss)	Y (EPR intensity)		X ( gauss)	Y (EPR intensity)
2500	0.0905937		2500	0.0810509
2501.17	0.0901704		2501.17	0.0807544
2502.34	0.0894348		2502.34	0.0802097
2503.52	0.0888805		2503.52	0.0800374
2504.69	0.0889193		2504.69	0.0799982
2505.86	0.089395		2505.86	0.0795168
2507.03	0.0901329		2507.03	0.079206
2508.2	0.0909379		2508.2	0.0792268
2509.38	0.0911626		2509.38	0.0792363
2510.55	0.0910943		2510.55	0.079714
2511.72	0.0911947		2511.72	0.0800675
2512.89	0.0909308		2512.89	0.0793494
2514.06	0.0902767		2514.06	0.0788917
2515.23	0.0901471		2515.23	0.0794509
2516.41	0.090589		2516.41	0.0798986
2517.58	0.0905072		2517.58	0.0801185
2518.75	0.0898453		2518.75	0.0800725
2519.92	0.0892021		2519.92	0.0796055
2521.09	0.0888525		2521.09	0.0791008
2522.27	0.0889546		2522.27	0.0784197
2523.44	0.0892732		2523.44	0.0779023
2524.61	0.0895823		2524.61	0.0780456
2525.78	0.0897107		2525.78	0.0784376
2526.95	0.0897385		2526.95	0.0785267
2528.12	0.09006		2528.12	0.0785621
2529.3	0.0901235		2529.3	0.0787975
2530.47	0.0896783		2530.47	0.0786745
2531.64	0.0896493		2531.64	0.0786443
2532.81	0.0903396		2532.81	0.0794094
2533.98	0.0911932		2533.98	0.0800414
2535.16	0.0914643		2535.16	0.080128
2536.33	0.0911051		2536.33	0.0801081
2537.5	0.0903672		2537.5	0.0800102
2538.67	0.0900293		2538.67	0.0794327
2539.84	0.0905016		2539.84	0.0782178
2541.02	0.0911809		2541.02	0.0773975
2542.19	0.0918759		2542.19	0.0776323
2543.36	0.0916723		2543.36	0.0779378
2544.53	0.0905206		2544.53	0.0780314
2545.7	0.0900346		2545.7	0.0784641
2546.88	0.0900963		2546.88	0.0788452
2548.05	0.0899904		2548.05	0.078939
2549.22	0.0901599		2549.22	0.0786778
2550.39	0.0903736		2550.39	0.0786577
2551.56	0.0903078		2551.56	0.0790907
2552.73	0.0902715		2552.73	0.0789119
2553.91	0.0905439		2553.91	0.0780189
2555.08	0.0908392		2555.08	0.0771905
2556.25	0.0903212		2556.25	0.0774457
2557.42	0.0896433		2557.42	0.078321
2558.59	0.0897178		2558.59	0.0786875
2559.77	0.0900831		2559.77	0.0788892
2560.94	0.0904884		2560.94	0.0793488
2562.11	0.0903629		2562.11	0.0794866
2563.28	0.0898902		2563.28	0.0791317
2564.45	0.0897453		2564.45	0.0789598
2565.62	0.0897554		2565.62	0.0790028
2566.8	0.089972		2566.8	0.0793835
2567.97	0.0901709		2567.97	0.0800858
2569.14	0.0901487		2569.14	0.0803893
2570.31	0.0896316		2570.31	0.0804271
2571.48	0.0886296		2571.48	0.0803891
2572.66	0.0882992		2572.66	0.0799634
2573.83	0.0887126		2573.83	0.0795379
2575	0.0890562		2575	0.079208
2576.17	0.0891631		2576.17	0.0787702
2577.34	0.0887084		2577.34	0.0784654
2578.52	0.088152		2578.52	0.0782437
2579.69	0.0886947		2579.69	0.0779732
2580.86	0.0898558		2580.86	0.0778574
2582.03	0.0905548		2582.03	0.0780144
2583.2	0.0909111		2583.2	0.0784269
2584.38	0.0911633		2584.38	0.0788608
2585.55	0.0913009		2585.55	0.0792982
2586.72	0.0908786		2586.72	0.0797377
2587.89	0.0899248		2587.89	0.0795585
2589.06	0.0894096		2589.06	0.0788942
2590.23	0.0899889		2590.23	0.0784485
2591.41	0.0908595		2591.41	0.0783801
2592.58	0.0911188		2592.58	0.0779441
2593.75	0.0912729		2593.75	0.0770937
2594.92	0.0911943		2594.92	0.077543
2596.09	0.0905417		2596.09	0.0788303
2597.27	0.0900432		2597.27	0.0791011
2598.44	0.0901073		2598.44	0.0787905
2599.61	0.0901621		2599.61	0.0790177
2600.78	0.0899525		2600.78	0.0795538
2601.95	0.0893847		2601.95	0.0794028
2603.12	0.0885266		2603.12	0.0787368
2604.3	0.0882073		2604.3	0.0784496
2605.47	0.0885512		2605.47	0.0789197
2606.64	0.0890961		2606.64	0.0795103
2607.81	0.0895239		2607.81	0.0796853
2608.98	0.0898037		2608.98	0.0798453
2610.16	0.0897923		2610.16	0.0797385
2611.33	0.0893972		2611.33	0.0797309
2612.5	0.088987		2612.5	0.0803102
2613.67	0.08882		2613.67	0.080248
2614.84	0.0889478		2614.84	0.0799267
2616.02	0.0890687		2616.02	0.0802491
2617.19	0.0891834		2617.19	0.0802824
2618.36	0.0890892		2618.36	0.0798185
2619.53	0.0887259		2619.53	0.0791978
2620.7	0.0891232		2620.7	0.0789558
2621.88	0.0899947		2621.88	0.0790168
2623.05	0.0903128		2623.05	0.0786683
2624.22	0.0905844		2624.22	0.0781513
2625.39	0.0908857		2625.39	0.0780483
2626.56	0.0905748		2626.56	0.0786058
2627.73	0.0901532		2627.73	0.0793961
2628.91	0.0895289		2628.91	0.0800455
2630.08	0.0888576		2630.08	0.0803
2631.25	0.0892468		2631.25	0.0801258
2632.42	0.0901921		2632.42	0.0803457
2633.59	0.0908449		2633.59	0.0809698
2634.77	0.0906008		2634.77	0.0809077
2635.94	0.0896917		2635.94	0.0802738
2637.11	0.0896941		2637.11	0.0801459
2638.28	0.0904557		2638.28	0.080423
2639.45	0.0906759		2639.45	0.0803356
2640.62	0.0901215		2640.62	0.0798935
2641.8	0.0896753		2641.8	0.0795658
2642.97	0.0901495		2642.97	0.0798332
2644.14	0.0908964		2644.14	0.0804635
2645.31	0.0914476		2645.31	0.0811226
2646.48	0.091944		2646.48	0.0819077
2647.66	0.0917425		2647.66	0.0825738
2648.83	0.09067		2648.83	0.0830998
2650	0.0893131		2650	0.083409
2651.17	0.0882391		2651.17	0.0834349
2652.34	0.0878767		2652.34	0.0837044
2653.52	0.0880812		2653.52	0.0841592
2654.69	0.0883357		2654.69	0.0843796
2655.86	0.0886279		2655.86	0.0847548
2657.03	0.089192		2657.03	0.0851307
2658.2	0.0895815		2658.2	0.0854083
2659.38	0.0899725		2659.38	0.0861692
2660.55	0.090607		2660.55	0.0869326
2661.72	0.0912408		2661.72	0.0871563
2662.89	0.0919609		2662.89	0.0867894
2664.06	0.0921488		2664.06	0.0866721
2665.23	0.0919663		2665.23	0.087699
2666.41	0.0918888		2666.41	0.0886296
2667.58	0.0911267		2667.58	0.0885398
2668.75	0.0909925		2668.75	0.0884809
2669.92	0.0922518		2669.92	0.0885741
2671.09	0.0925958		2671.09	0.0882229
2672.27	0.0919735		2672.27	0.0884635
2673.44	0.0916464		2673.44	0.0895798
2674.61	0.091289		2674.61	0.0907189
2675.78	0.0910845		2675.78	0.0918129
2676.95	0.0916565		2676.95	0.0926832
2678.12	0.0929535		2678.12	0.093301
2679.3	0.0942649		2679.3	0.0937774
2680.47	0.0953273		2680.47	0.0939854
2681.64	0.0959114		2681.64	0.0941273
2682.81	0.0958529		2682.81	0.0944134
2683.98	0.0962235		2683.98	0.0952298
2685.16	0.09697		2685.16	0.0962427
2686.33	0.0978871		2686.33	0.0969732
2687.5	0.098978		2687.5	0.0982752
2688.67	0.0995994		2688.67	0.100108
2689.84	0.100025		2689.84	0.101456
2691.02	0.100588		2691.02	0.101815
2692.19	0.101624		2692.19	0.101944
2693.36	0.102634		2693.36	0.103171
2694.53	0.102849		2694.53	0.104516
2695.7	0.103213		2695.7	0.104953
2696.88	0.10415		2696.88	0.10541
2698.05	0.104907		2698.05	0.106067
2699.22	0.105467		2699.22	0.106674
2700.39	0.106123		2700.39	0.107459
2701.56	0.106361		2701.56	0.108432
2702.73	0.10629		2702.73	0.109333
2703.91	0.106967		2703.91	0.109945
2705.08	0.107972		2705.08	0.110553
2706.25	0.108721		2706.25	0.111374
2707.42	0.10923		2707.42	0.112341
2708.59	0.10962		2708.59	0.113508
2709.77	0.110845		2709.77	0.114287
2710.94	0.111979		2710.94	0.114645
2712.11	0.11199		2712.11	0.114999
2713.28	0.111756		2713.28	0.115342
2714.45	0.111943		2714.45	0.115675
2715.62	0.113007		2715.62	0.115291
2716.8	0.113554		2716.8	0.114383
2717.97	0.112887		2717.97	0.114203
2719.14	0.112585		2719.14	0.1147
2720.31	0.11281		2720.31	0.114557
2721.48	0.113064		2721.48	0.113692
2722.66	0.113152		2722.66	0.113147
2723.83	0.112969		2723.83	0.112921
2725	0.112448		2725	0.112647
2726.17	0.112062		2726.17	0.111922
2727.34	0.11241		2727.34	0.110667
2728.52	0.112751		2728.52	0.109716
2729.69	0.11214		2729.69	0.109156
2730.86	0.111039		2730.86	0.108801
2732.03	0.110629		2732.03	0.108516
2733.2	0.110439		2733.2	0.107997
2734.38	0.10964		2734.38	0.107546
2735.55	0.108602		2735.55	0.106847
2736.72	0.107425		2736.72	0.105788
2737.89	0.106184		2737.89	0.105089
2739.06	0.105619		2739.06	0.104289
2740.23	0.105511		2740.23	0.102858
2741.41	0.104939		2741.41	0.101173
2742.58	0.104007		2742.58	0.0993177
2743.75	0.103084		2743.75	0.0975033
2744.92	0.102543		2744.92	0.0961626
2746.09	0.101787		2746.09	0.0955867
2747.27	0.100496		2747.27	0.0947859
2748.44	0.0994311		2748.44	0.0932146
2749.61	0.0984804		2749.61	0.0921255
2750.78	0.0976759		2750.78	0.0913465
2751.95	0.0968552		2751.95	0.0906369
2753.12	0.096039		2753.12	0.0909746
2754.3	0.0955444		2754.3	0.0912721
2755.47	0.0947905		2755.47	0.0904582
2756.64	0.0942446		2756.64	0.0898237
2757.81	0.0942422		2757.81	0.0892303
2758.98	0.0938208		2758.98	0.0880624
2760.16	0.0932744		2760.16	0.0872674
2761.33	0.0930467		2761.33	0.0866678
2762.5	0.092703		2762.5	0.0858246
2763.67	0.0927368		2763.67	0.0852026
2764.84	0.0932098		2764.84	0.0850843
2766.02	0.0929111		2766.02	0.0854228
2767.19	0.091888		2767.19	0.0854477
2768.36	0.0912542		2768.36	0.084655
2769.53	0.0911798		2769.53	0.0837684
2770.7	0.0914085		2770.7	0.0840053
2771.88	0.0918015		2771.88	0.0848301
2773.05	0.0920428		2773.05	0.0845799
2774.22	0.0919907		2774.22	0.0836818
2775.39	0.0915735		2775.39	0.0833607
2776.56	0.0910417		2776.56	0.0835118
2777.73	0.0907373		2777.73	0.083562
2778.91	0.0905207		2778.91	0.0833473
2780.08	0.0907613		2780.08	0.0827699
2781.25	0.0912413		2781.25	0.0820402
2782.42	0.091074		2782.42	0.0816359
2783.59	0.0906225		2783.59	0.0816273
2784.77	0.0904907		2784.77	0.0816268
2785.94	0.090681		2785.94	0.0816242
2787.11	0.0907738		2787.11	0.0817654
2788.28	0.0905698		2788.28	0.0814561
2789.45	0.0905891		2789.45	0.0810356
2790.62	0.0909705		2790.62	0.0813831
2791.8	0.0911844		2791.8	0.0814483
2792.97	0.0909122		2792.97	0.0809263
2794.14	0.0904212		2794.14	0.0813025
2795.31	0.0899851		2795.31	0.0823101
2796.48	0.0898095		2796.48	0.0826283
2797.66	0.0902609		2797.66	0.082324
2798.83	0.0909874		2798.83	0.0816552
2800	0.0912725		2800	0.0810356
2801.17	0.091168		2801.17	0.0810442
2802.34	0.0913957		2802.34	0.0811117
2803.52	0.0920585		2803.52	0.0810975
2804.69	0.0925424		2804.69	0.0811262
2805.86	0.0927268		2805.86	0.0810363
2807.03	0.0924795		2807.03	0.0814094
2808.2	0.0918241		2808.2	0.0824876
2809.38	0.0911046		2809.38	0.0834442
2810.55	0.0909286		2810.55	0.0837726
2811.72	0.0915432		2811.72	0.0839238
2812.89	0.0917119		2812.89	0.0843925
2814.06	0.0908939		2814.06	0.0852629
2815.23	0.0902427		2815.23	0.0862361
2816.41	0.0903584		2816.41	0.0869012
2817.58	0.0910116		2817.58	0.0876078
2818.75	0.0915026		2818.75	0.0880822
2819.92	0.0911719		2819.92	0.0873296
2821.09	0.0909633		2821.09	0.0862917
2822.27	0.0911322		2822.27	0.0862561
2823.44	0.091335		2823.44	0.0863681
2824.61	0.0917632		2824.61	0.0858048
2825.78	0.0921666		2825.78	0.0857603
2826.95	0.0927582		2826.95	0.0867883
2828.12	0.0933532		2828.12	0.0879509
2829.3	0.0937548		2829.3	0.088582
2830.47	0.0942081		2830.47	0.0889414
2831.64	0.0946236		2831.64	0.0894796
2832.81	0.0953657		2832.81	0.0897573
2833.98	0.0966753		2833.98	0.0897211
2835.16	0.0980072		2835.16	0.0898644
2836.33	0.0991755		2836.33	0.090104
2837.5	0.100574		2837.5	0.0901878
2838.67	0.101801		2838.67	0.0901524
2839.84	0.102528		2839.84	0.0899962
2841.02	0.103208		2841.02	0.0900367
2842.19	0.103986		2842.19	0.0905301
2843.36	0.105275		2843.36	0.0908504
2844.53	0.107284		2844.53	0.0909027
2845.7	0.10879		2845.7	0.0912149
2846.88	0.109295		2846.88	0.09162
2848.05	0.110116		2848.05	0.09162
2849.22	0.111455		2849.22	0.0912739
2850.39	0.112572		2850.39	0.0908568
2851.56	0.11366		2851.56	0.0908907
2852.73	0.115049		2852.73	0.0916526
2853.91	0.115698		2853.91	0.0927646
2855.08	0.11598		2855.08	0.0938499
2856.25	0.117539		2856.25	0.0941907
2857.42	0.119308		2857.42	0.0943209
2858.59	0.120006		2858.59	0.0953632
2859.77	0.119733		2859.77	0.0965044
2860.94	0.119391		2860.94	0.0974209
2862.11	0.119685		2862.11	0.0990283
2863.28	0.120485		2863.28	0.100687
2864.45	0.121715		2864.45	0.101321
2865.62	0.122303		2865.62	0.101634
2866.8	0.122349		2866.8	0.102278
2867.97	0.122664		2867.97	0.102801
2869.14	0.12233		2869.14	0.103524
2870.31	0.122195		2870.31	0.104874
2871.48	0.122509		2871.48	0.106099
2872.66	0.122231		2872.66	0.107019
2873.83	0.121851		2873.83	0.107961
2875	0.1218		2875	0.109252
2876.17	0.122037		2876.17	0.111097
2877.34	0.121469		2877.34	0.112828
2878.52	0.119883		2878.52	0.113784
2879.69	0.118279		2879.69	0.114274
2880.86	0.1167		2880.86	0.115211
2882.03	0.115437		2882.03	0.116512
2883.2	0.114547		2883.2	0.118237
2884.38	0.113217		2884.38	0.120292
2885.55	0.111464		2885.55	0.121412
2886.72	0.110289		2886.72	0.121888
2887.89	0.109628		2887.89	0.122899
2889.06	0.108895		2889.06	0.124255
2890.23	0.108151		2890.23	0.125163
2891.41	0.107761		2891.41	0.125679
2892.58	0.107564		2892.58	0.126315
2893.75	0.106709		2893.75	0.127004
2894.92	0.105673		2894.92	0.127817
2896.09	0.104718		2896.09	0.128506
2897.27	0.103881		2897.27	0.128343
2898.44	0.103681		2898.44	0.127798
2899.61	0.103795		2899.61	0.127511
2900.78	0.102875		2900.78	0.127539
2901.95	0.100515		2901.95	0.127663
2903.12	0.0984837		2903.12	0.127407
2904.3	0.0974147		2904.3	0.12634
2905.47	0.0969981		2905.47	0.125405
2906.64	0.0972281		2906.64	0.125225
2907.81	0.0975021		2907.81	0.12429
2908.98	0.0971772		2908.98	0.122958
2910.16	0.0965245		2910.16	0.12206
2911.33	0.0963609		2911.33	0.121049
2912.5	0.0965003		2912.5	0.120009
2913.67	0.0962251		2913.67	0.118797
2914.84	0.0959178		2914.84	0.117686
2916.02	0.0961136		2916.02	0.116913
2917.19	0.0960869		2917.19	0.115792
2918.36	0.0954877		2918.36	0.114205
2919.53	0.0946409		2919.53	0.112969
2920.7	0.0938064		2920.7	0.112214
2921.88	0.0934378		2921.88	0.110987
2923.05	0.0936604		2923.05	0.109457
2924.22	0.0942337		2924.22	0.108257
2925.39	0.0949865		2925.39	0.107106
2926.56	0.0955718		2926.56	0.105983
2927.73	0.0950929		2927.73	0.104793
2928.91	0.0938914		2928.91	0.102902
2930.08	0.0930531		2930.08	0.101137
2931.25	0.092411		2931.25	0.100261
2932.42	0.0917361		2932.42	0.099606
2933.59	0.091388		2933.59	0.0990514
2934.77	0.0917609		2934.77	0.0979095
2935.94	0.0930041		2935.94	0.0961537
2937.11	0.0943463		2937.11	0.0950728
2938.28	0.0945907		2938.28	0.0949148
2939.45	0.0935449		2939.45	0.0950276
2940.62	0.0923976		2940.62	0.0945405
2941.8	0.0922939		2941.8	0.0933156
2942.97	0.092768		2942.97	0.0923983
2944.14	0.092923		2944.14	0.0923458
2945.31	0.0927713		2945.31	0.0925325
2946.48	0.0925493		2946.48	0.0924815
2947.66	0.0924759		2947.66	0.0921115
2948.83	0.0930186		2948.83	0.0913123
2950	0.0941181		2950	0.090216
2951.17	0.0953096		2951.17	0.0895724
2952.34	0.0957571		2952.34	0.089358
2953.52	0.0950131		2953.52	0.0890536
2954.69	0.094064		2954.69	0.0891584
2955.86	0.0938794		2955.86	0.0896523
2957.03	0.0945403		2957.03	0.0894114
2958.2	0.0950734		2958.2	0.0888247
2959.38	0.0944749		2959.38	0.0889939
2960.55	0.0934143		2960.55	0.0894789
2961.72	0.0930786		2961.72	0.0896754
2962.89	0.0934582		2962.89	0.0901288
2964.06	0.0941154		2964.06	0.090932
2965.23	0.0944667		2965.23	0.0910636
2966.41	0.0945815		2966.41	0.0906948
2967.58	0.0950148		2967.58	0.0899196
2968.75	0.0955412		2968.75	0.0891715
2969.92	0.0966608		2969.92	0.0892676
2971.09	0.0982195		2971.09	0.0898128
2972.27	0.0988824		2972.27	0.0905132
2973.44	0.0989276		2973.44	0.0909153
2974.61	0.0990873		2974.61	0.0905799
2975.78	0.0995588		2975.78	0.0899862
2976.95	0.100344		2976.95	0.0900484
2978.12	0.10119		2978.12	0.0908767
2979.3	0.101975		2979.3	0.0920685
2980.47	0.102418		2980.47	0.0928292
2981.64	0.102836		2981.64	0.092512
2982.81	0.103733		2982.81	0.0917036
2983.98	0.105042		2983.98	0.0916483
2985.16	0.106271		2985.16	0.0920896
2986.33	0.107403		2986.33	0.0919115
2987.5	0.108741		2987.5	0.0919767
2988.67	0.109713		2988.67	0.0923128
2989.84	0.110192		2989.84	0.0921397
2991.02	0.110679		2991.02	0.0920795
2992.19	0.11209		2992.19	0.0926741
2993.36	0.114274		2993.36	0.0938166
2994.53	0.115811		2994.53	0.0946816
2995.7	0.116763		2995.7	0.0948071
2996.88	0.117848		2996.88	0.0943233
2998.05	0.11879		2998.05	0.0940093
2999.22	0.119133		2999.22	0.0945331
3000.39	0.119628		3000.39	0.095295
3001.56	0.12048		3001.56	0.0962186
3002.73	0.120861		3002.73	0.097182
3003.91	0.121365		3003.91	0.0976014
3005.08	0.122483		3005.08	0.0982813
3006.25	0.123776		3006.25	0.0994551
3007.42	0.12516		3007.42	0.0996618
3008.59	0.125868		3008.59	0.0989028
3009.77	0.12564		3009.77	0.0984743
3010.94	0.125952		3010.94	0.09855
3012.11	0.127265		3012.11	0.098646
3013.28	0.128036		3013.28	0.0986197
3014.45	0.12819		3014.45	0.0986693
3015.62	0.128605		3015.62	0.0990771
3016.8	0.128944		3016.8	0.099866
3017.97	0.128742		3017.97	0.100241
3019.14	0.128179		3019.14	0.0999205
3020.31	0.128267		3020.31	0.0996617
3021.48	0.128485		3021.48	0.100156
3022.66	0.128202		3022.66	0.101582
3023.83	0.127827		3023.83	0.102765
3025	0.126785		3025	0.10302
3026.17	0.125146		3026.17	0.103217
3027.34	0.123993		3027.34	0.1036
3028.52	0.123371		3028.52	0.104219
3029.69	0.12248		3029.69	0.104735
3030.86	0.121374		3030.86	0.104913
3032.03	0.120542		3032.03	0.106098
3033.2	0.120107		3033.2	0.108056
3034.38	0.119626		3034.38	0.109118
3035.55	0.118679		3035.55	0.109616
3036.72	0.117766		3036.72	0.110402
3037.89	0.117231		3037.89	0.111118
3039.06	0.11682		3039.06	0.1114
3040.23	0.115894		3040.23	0.111934
3041.41	0.114684		3041.41	0.113043
3042.58	0.113758		3042.58	0.114111
3043.75	0.112413		3043.75	0.114978
3044.92	0.110786		3044.92	0.115917
3046.09	0.109485		3046.09	0.117514
3047.27	0.108603		3047.27	0.11941
3048.44	0.10843		3048.44	0.120894
3049.61	0.108548		3049.61	0.122534
3050.78	0.108046		3050.78	0.124048
3051.95	0.1074		3051.95	0.124908
3053.12	0.107174		3053.12	0.125666
3054.3	0.10673		3054.3	0.127031
3055.47	0.106313		3055.47	0.129022
3056.64	0.105979		3056.64	0.130673
3057.81	0.105506		3057.81	0.132061
3058.98	0.105657		3058.98	0.133466
3060.16	0.105987		3060.16	0.134678
3061.33	0.105496		3061.33	0.136074
3062.5	0.104621		3062.5	0.137627
3063.67	0.104096		3063.67	0.139012
3064.84	0.103798		3064.84	0.140133
3066.02	0.103487		3066.02	0.141467
3067.19	0.103474		3067.19	0.143134
3068.36	0.10406		3068.36	0.144382
3069.53	0.104692		3069.53	0.145448
3070.7	0.104919		3070.7	0.146682
3071.88	0.104777		3071.88	0.147652
3073.05	0.104459		3073.05	0.14819
3074.22	0.104354		3074.22	0.148552
3075.39	0.104433		3075.39	0.148787
3076.56	0.104831		3076.56	0.148814
3077.73	0.105126		3077.73	0.148977
3078.91	0.104991		3078.91	0.148864
3080.08	0.104942		3080.08	0.148104
3081.25	0.105369		3081.25	0.147962
3082.42	0.105925		3082.42	0.148769
3083.59	0.106		3083.59	0.149415
3084.77	0.106088		3084.77	0.149571
3085.94	0.106425		3085.94	0.149575
3087.11	0.106813		3087.11	0.149567
3088.28	0.106922		3088.28	0.149269
3089.45	0.107056		3089.45	0.149399
3090.62	0.107516		3090.62	0.149817
3091.8	0.107705		3091.8	0.14915
3092.97	0.107877		3092.97	0.14787
3094.14	0.107895		3094.14	0.146934
3095.31	0.107873		3095.31	0.146741
3096.48	0.108486		3096.48	0.146884
3097.66	0.109457		3097.66	0.146168
3098.83	0.110196		3098.83	0.144789
3100	0.110797		3100	0.143467
3101.17	0.111296		3101.17	0.142558
3102.34	0.111446		3102.34	0.142049
3103.52	0.111839		3103.52	0.141279
3104.69	0.112743		3104.69	0.140529
3105.86	0.113939		3105.86	0.140031
3107.03	0.115027		3107.03	0.139549
3108.2	0.116266		3108.2	0.138832
3109.38	0.118086		3109.38	0.13794
3110.55	0.119705		3110.55	0.137394
3111.72	0.120828		3111.72	0.136782
3112.89	0.121797		3112.89	0.136093
3114.06	0.122654		3114.06	0.13607
3115.23	0.123295		3115.23	0.136566
3116.41	0.123646		3116.41	0.136849
3117.58	0.123797		3117.58	0.136657
3118.75	0.124681		3118.75	0.136169
3119.92	0.126681		3119.92	0.135882
3121.09	0.128811		3121.09	0.136211
3122.27	0.130301		3122.27	0.136733
3123.44	0.131217		3123.44	0.137088
3124.61	0.13263		3124.61	0.137372
3125.78	0.134686		3125.78	0.137226
3126.95	0.135982		3126.95	0.136718
3128.12	0.136345		3128.12	0.136496
3129.3	0.137518		3129.3	0.136236
3130.47	0.139638		3130.47	0.136082
3131.64	0.141554		3131.64	0.136812
3132.81	0.142943		3132.81	0.137984
3133.98	0.143889		3133.98	0.138943
3135.16	0.145524		3135.16	0.139446
3136.33	0.147502		3136.33	0.139985
3137.5	0.1486		3137.5	0.141151
3138.67	0.149285		3138.67	0.142495
3139.84	0.150539		3139.84	0.143313
3141.02	0.152752		3141.02	0.143374
3142.19	0.154986		3142.19	0.14398
3143.36	0.156343		3143.36	0.145897
3144.53	0.157156		3144.53	0.148
3145.7	0.158603		3145.7	0.149455
3146.88	0.160689		3146.88	0.150377
3148.05	0.162269		3148.05	0.151439
3149.22	0.163473		3149.22	0.152888
3150.39	0.165196		3150.39	0.154677
3151.56	0.167966		3151.56	0.156422
3152.73	0.17034		3152.73	0.1578
3153.91	0.17135		3153.91	0.159298
3155.08	0.172117		3155.08	0.161152
3156.25	0.17298		3156.25	0.162884
3157.42	0.174527		3157.42	0.164015
3158.59	0.176806		3158.59	0.16538
3159.77	0.178311		3159.77	0.167053
3160.94	0.17909		3160.94	0.167385
3162.11	0.180411		3162.11	0.167453
3163.28	0.181669		3163.28	0.16925
3164.45	0.18226		3164.45	0.171747
3165.62	0.182472		3165.62	0.173491
3166.8	0.182046		3166.8	0.174916
3167.97	0.181174		3167.97	0.176832
3169.14	0.18052		3169.14	0.178531
3170.31	0.18063		3170.31	0.180094
3171.48	0.180841		3171.48	0.18201
3172.66	0.180389		3172.66	0.183696
3173.83	0.180132		3173.83	0.185781
3175	0.179766		3175	0.188438
3176.17	0.17868		3176.17	0.190667
3177.34	0.178186		3177.34	0.192655
3178.52	0.178445		3178.52	0.194843
3179.69	0.178083		3179.69	0.196963
3180.86	0.177487		3180.86	0.198912
3182.03	0.177027		3182.03	0.200915
3183.2	0.175605		3183.2	0.203237
3184.38	0.173788		3184.38	0.205909
3185.55	0.172033		3185.55	0.208442
3186.72	0.170374		3186.72	0.210728
3187.89	0.168685		3187.89	0.212925
3189.06	0.166584		3189.06	0.214623
3190.23	0.164953		3190.23	0.216267
3191.41	0.163456		3191.41	0.218546
3192.58	0.161264		3192.58	0.221302
3193.75	0.158691		3193.75	0.22411
3194.92	0.156272		3194.92	0.22678
3196.09	0.154152		3196.09	0.228959
3197.27	0.15168		3197.27	0.23018
3198.44	0.149207		3198.44	0.23119
3199.61	0.147459		3199.61	0.232849
3200.78	0.146039		3200.78	0.234943
3201.95	0.144251		3201.95	0.236888
3203.12	0.141914		3203.12	0.238753
3204.3	0.139397		3204.3	0.240513
3205.47	0.136114		3205.47	0.241757
3206.64	0.131748		3206.64	0.242617
3207.81	0.1274		3207.81	0.243372
3208.98	0.123835		3208.98	0.24412
3210.16	0.120424		3210.16	0.245326
3211.33	0.117341		3211.33	0.246954
3212.5	0.115086		3212.5	0.247702
3213.67	0.112712		3213.67	0.24738
3214.84	0.110313		3214.84	0.247377
3216.02	0.10795		3216.02	0.247944
3217.19	0.104836		3217.19	0.247701
3218.36	0.101791		3218.36	0.246825
3219.53	0.0995857		3219.53	0.246454
3220.7	0.0975461		3220.7	0.246026
3221.88	0.0951371		3221.88	0.245036
3223.05	0.0926027		3223.05	0.243743
3224.22	0.0900073		3224.22	0.24224
3225.39	0.0865679		3225.39	0.240624
3226.56	0.0825154		3226.56	0.237929
3227.73	0.0789116		3227.73	0.233405
3228.91	0.0757131		3228.91	0.228109
3230.08	0.0726892		3230.08	0.222615
3231.25	0.0699645		3231.25	0.217174
3232.42	0.067156		3232.42	0.211815
3233.59	0.0644737		3233.59	0.206031
3234.77	0.0620334		3234.77	0.199919
3235.94	0.0588125		3235.94	0.193751
3237.11	0.0545523		3237.11	0.187404
3238.28	0.0500062		3238.28	0.180745
3239.45	0.0457354		3239.45	0.173434
3240.62	0.0419888		3240.62	0.165492
3241.8	0.0385882		3241.8	0.157653
3242.97	0.0353592		3242.97	0.149089
3244.14	0.0326396		3244.14	0.139223
3245.31	0.0305798		3245.31	0.129118
3246.48	0.0288943		3246.48	0.118577
3247.66	0.0264501		3247.66	0.107844
3248.83	0.0228199		3248.83	0.0974854
3250	0.0189066		3250	0.0869762
3251.17	0.0149795		3251.17	0.0762268
3252.34	0.010753		3252.34	0.064941
3253.52	0.0069915		3253.52	0.0532966
3254.69	0.00372423		3254.69	0.041412
3255.86	9.7107e-07		3255.86	0.0292303
3257.03	-0.00329975		3257.03	0.0174203
3258.2	-0.00542565		3258.2	0.00588188
3259.38	-0.00711089		3259.38	-0.00520936
3260.55	-0.00919695		3260.55	-0.0149093
3261.72	-0.0118653		3261.72	-0.0234462
3262.89	-0.0147482		3262.89	-0.0311851
3264.06	-0.0180273		3264.06	-0.0382114
3265.23	-0.0220447		3265.23	-0.0454542
3266.41	-0.0260051		3266.41	-0.0528823
3267.58	-0.0292392		3267.58	-0.0597119
3268.75	-0.0321411		3268.75	-0.0659511
3269.92	-0.0347915		3269.92	-0.0719703
3271.09	-0.0369884		3271.09	-0.0779472
3272.27	-0.0387186		3272.27	-0.0835962
3273.44	-0.0400957		3273.44	-0.0883569
3274.61	-0.0414253		3274.61	-0.0917749
3275.78	-0.0429731		3275.78	-0.0944575
3276.95	-0.0451533		3276.95	-0.096944
3278.12	-0.048216		3278.12	-0.0989284
3279.3	-0.0516424		3279.3	-0.100888
3280.47	-0.0547656		3280.47	-0.102643
3281.64	-0.0574937		3281.64	-0.103922
3282.81	-0.0597456		3282.81	-0.105272
3283.98	-0.061766		3283.98	-0.106147
3285.16	-0.0635805		3285.16	-0.106482
3286.33	-0.0651362		3286.33	-0.107018
3287.5	-0.0672044		3287.5	-0.107173
3288.67	-0.0695326		3288.67	-0.106484
3289.84	-0.0719186		3289.84	-0.10597
3291.02	-0.0748132		3291.02	-0.106509
3292.19	-0.07775		3292.19	-0.107751
3293.36	-0.0799297		3293.36	-0.108636
3294.53	-0.0816922		3294.53	-0.109086
3295.7	-0.0833141		3295.7	-0.110013
3296.88	-0.0843239		3296.88	-0.111065
3298.05	-0.0852954		3298.05	-0.111993
3299.22	-0.0862226		3299.22	-0.113645
3300.39	-0.0866634		3300.39	-0.116082
3301.56	-0.0871115		3301.56	-0.118986
3302.73	-0.087888		3302.73	-0.12245
3303.91	-0.0887259		3303.91	-0.126632
3305.08	-0.089641		3305.08	-0.131482
3306.25	-0.0906426		3306.25	-0.136924
3307.42	-0.0912881		3307.42	-0.143576
3308.59	-0.0918797		3308.59	-0.15139
3309.77	-0.0922393		3309.77	-0.158671
3310.94	-0.0919767		3310.94	-0.165781
3312.11	-0.0912401		3312.11	-0.1737
3313.28	-0.0904153		3313.28	-0.18219
3314.45	-0.0900447		3314.45	-0.191355
3315.62	-0.0894049		3315.62	-0.200375
3316.8	-0.0882768		3316.8	-0.209073
3317.97	-0.0874874		3317.97	-0.218507
3319.14	-0.0868911		3319.14	-0.228271
3320.31	-0.0859225		3320.31	-0.23748
3321.48	-0.0845517		3321.48	-0.246229
3322.66	-0.0828181		3322.66	-0.2538
3323.83	-0.0804794		3323.83	-0.260636
3325	-0.0775674		3325	-0.268151
3326.17	-0.0743391		3326.17	-0.275592
3327.34	-0.0706353		3327.34	-0.282271
3328.52	-0.0668152		3328.52	-0.288508
3329.69	-0.0636232		3329.69	-0.29381
3330.86	-0.0604096		3330.86	-0.297803
3332.03	-0.0575756		3332.03	-0.302098
3333.2	-0.0563674		3333.2	-0.307651
3334.38	-0.056144		3334.38	-0.313273
3335.55	-0.0558332		3335.55	-0.318235
3336.72	-0.0546555		3336.72	-0.322155
3337.89	-0.0525876		3337.89	-0.32424
3339.06	-0.0508614		3339.06	-0.325794
3340.23	-0.0496692		3340.23	-0.328162
3341.41	-0.0488952		3341.41	-0.330504
3342.58	-0.0495734		3342.58	-0.332348
3343.75	-0.049897		3343.75	-0.332978
3344.92	-0.0464746		3344.92	-0.330869
3346.09	-0.0398207		3346.09	-0.325293
3347.27	-0.0327936		3347.27	-0.31722
3348.44	-0.0261576		3348.44	-0.307769
3349.61	-0.0201634		3349.61	-0.298535
3350.78	-0.0152381		3350.78	-0.289899
3351.95	-0.0102651		3351.95	-0.280276
3353.12	-0.00537974		3353.12	-0.270423
3354.3	-0.00191558		3354.3	-0.261645
3355.47	0.00117187		3355.47	-0.252962
3356.64	0.00491924		3356.64	-0.243313
3357.81	0.0086334		3357.81	-0.232936
3358.98	0.0125474		3358.98	-0.221975
3360.16	0.0163215		3360.16	-0.210783
3361.33	0.0189609		3361.33	-0.199957
3362.5	0.0214535		3362.5	-0.188841
3363.67	0.0247747		3363.67	-0.177543
3364.84	0.0282383		3364.84	-0.16674
3366.02	0.031015		3366.02	-0.156049
3367.19	0.0332061		3367.19	-0.145887
3368.36	0.0352785		3368.36	-0.136039
3369.53	0.037105		3369.53	-0.126083
3370.7	0.0393252		3370.7	-0.116409
3371.88	0.0421877		3371.88	-0.106532
3373.05	0.0448212		3373.05	-0.0965417
3374.22	0.0472251		3374.22	-0.0872756
3375.39	0.0494853		3375.39	-0.0787048
3376.56	0.0508215		3376.56	-0.0700735
3377.73	0.0515253		3377.73	-0.0612991
3378.91	0.0528045		3378.91	-0.0530804
3380.08	0.0546144		3380.08	-0.0455289
3381.25	0.0565196		3381.25	-0.0380916
3382.42	0.0579046		3382.42	-0.0312658
3383.59	0.0589569		3383.59	-0.0249993
3384.77	0.0601716		3384.77	-0.0185037
3385.94	0.0610937		3385.94	-0.0126974
3387.11	0.0619163		3387.11	-0.00736917
3388.28	0.0628529		3388.28	-0.00185191
3389.45	0.0638777		3389.45	0.00328775
3390.62	0.0655201		3390.62	0.00815616
3391.8	0.067508		3391.8	0.0123601
3392.97	0.0688868		3392.97	0.0153764
3394.14	0.0695843		3394.14	0.0182897
3395.31	0.0698894		3395.31	0.0216578
3396.48	0.0702602		3396.48	0.0247476
3397.66	0.0708922		3397.66	0.0273249
3398.83	0.0714179		3398.83	0.0297716
3400	0.0722839		3400	0.0325634
3401.17	0.0734142		3401.17	0.0349745
3402.34	0.0742649		3402.34	0.0364199
3403.52	0.07477		3403.52	0.0374507
3404.69	0.0747247		3404.69	0.038327
3405.86	0.0743857		3405.86	0.039551
3407.03	0.0739563		3407.03	0.0415992
3408.2	0.0734348		3408.2	0.0436178
3409.38	0.0726533		3409.38	0.0451982
3410.55	0.072204		3410.55	0.0469622
3411.72	0.0729011		3411.72	0.0488059
3412.89	0.0740305		3412.89	0.0499982
3414.06	0.0746098		3414.06	0.0504146
3415.23	0.0747833		3415.23	0.0510384
3416.41	0.0752493		3416.41	0.0516054
3417.58	0.0758319		3417.58	0.0519727
3418.75	0.0761546		3418.75	0.0525232
3419.92	0.0762678		3419.92	0.0528288
3421.09	0.0761348		3421.09	0.0533144
3422.27	0.0763559		3422.27	0.0542351
3423.44	0.0772388		3423.44	0.0552983
3424.61	0.0779335		3424.61	0.0556982
3425.78	0.0781836		3425.78	0.0557652
3426.95	0.0783879		3426.95	0.0565697
3428.12	0.0784168		3428.12	0.0572147
3429.3	0.0786047		3429.3	0.0573323
3430.47	0.079008		3430.47	0.0577092
3431.64	0.078479		3431.64	0.0580476
3432.81	0.077992		3432.81	0.0582927
3433.98	0.0784441		3433.98	0.0589725
3435.16	0.0788015		3435.16	0.0590935
3436.33	0.0788374		3436.33	0.0591748
3437.5	0.0785124		3437.5	0.0598897
3438.67	0.0783879		3438.67	0.0595681
3439.84	0.0790151		3439.84	0.0590558
3441.02	0.0796875		3441.02	0.0594278
3442.19	0.0796481		3442.19	0.059947
3443.36	0.079184		3443.36	0.0603579
3444.53	0.0791362		3444.53	0.060379
3445.7	0.0791231		3445.7	0.0602591
3446.88	0.0784945		3446.88	0.0603754
3448.05	0.0783519		3448.05	0.0603843
3449.22	0.0792474		3449.22	0.0598581
3450.39	0.0796263		3450.39	0.0595069
3451.56	0.0792221		3451.56	0.0596908
3452.73	0.0790276		3452.73	0.0597687
3453.91	0.0785646		3453.91	0.0598943
3455.08	0.0781678		3455.08	0.0598306
3456.25	0.0785398		3456.25	0.0598126
3457.42	0.079018		3457.42	0.06026
3458.59	0.0792126		3458.59	0.0606011
3459.77	0.079002		3459.77	0.0605369
3460.94	0.0784886		3460.94	0.0603984
3462.11	0.0786496		3462.11	0.0607938
3463.28	0.0796537		3463.28	0.0612041
3464.45	0.0804407		3464.45	0.0611181
3465.62	0.0813288		3465.62	0.0614074
3466.8	0.0822409		3466.8	0.0621861
3467.97	0.0821792		3467.97	0.0625315
3469.14	0.0818392		3469.14	0.0628108
3470.31	0.0818641		3470.31	0.0634111
3471.48	0.0818006		3471.48	0.0633501
3472.66	0.0811735		3472.66	0.0625523
3473.83	0.080112		3473.83	0.0621199
3475	0.0793534		3475	0.0623683
3476.17	0.0788532		3476.17	0.0623199
3477.34	0.078564		3477.34	0.0618401
3478.52	0.0788523		3478.52	0.061802
3479.69	0.0794001		3479.69	0.061565
3480.86	0.0794637		3480.86	0.0608738
3482.03	0.0790329		3482.03	0.0607837
3483.2	0.078424		3483.2	0.0613375
3484.38	0.0778581		3484.38	0.0618361
3485.55	0.0779627		3485.55	0.0621186
3486.72	0.0780487		3486.72	0.0622903
3487.89	0.0780253		3487.89	0.0622114
3489.06	0.078661		3489.06	0.0619621
3490.23	0.079194		3490.23	0.0613518
3491.41	0.0790957		3491.41	0.0605836
3492.58	0.0786714		3492.58	0.060233
3493.75	0.0788085		3493.75	0.0601544
3494.92	0.0796783		3494.92	0.0599906
3496.09	0.0795758		3496.09	0.0595776
3497.27	0.0784267		3497.27	0.059705
3498.44	0.0779221		3498.44	0.0603066
3499.61	0.0782281		3499.61	0.0603514
3500.78	0.0787158		3500.78	0.0602066
3501.95	0.0789069		3501.95	0.0602048
3503.12	0.0787252		3503.12	0.060312
3504.3	0.078592		3504.3	0.0606521
3505.47	0.0784779		3505.47	0.0608133
3506.64	0.0781587		3506.64	0.0608584
3507.81	0.0779091		3507.81	0.0611134
3508.98	0.078173		3508.98	0.0609205
3510.16	0.0787451		3510.16	0.0602525
3511.33	0.0787145		3511.33	0.0598409
3512.5	0.0782017		3512.5	0.0598039
3513.67	0.0784401		3513.67	0.0600555
3514.84	0.0790709		3514.84	0.0602236
3516.02	0.0794187		3516.02	0.0599905
3517.19	0.0798834		3517.19	0.0597778
3518.36	0.0802123		3518.36	0.0597572
3519.53	0.0801635		3519.53	0.0598661
3520.7	0.0799166		3520.7	0.0603218
3521.88	0.0796093		3521.88	0.061175
3523.05	0.0790108		3523.05	0.061817
3524.22	0.0787259		3524.22	0.0616774
3525.39	0.0789579		3525.39	0.0614692
3526.56	0.0790085		3526.56	0.0614275
3527.73	0.0790525		3527.73	0.0609897
3528.91	0.078819		3528.91	0.0604104
3530.08	0.0785527		3530.08	0.0601126
3531.25	0.0787206		3531.25	0.0607243
3532.42	0.0788157		3532.42	0.0618271
3533.59	0.0784012		3533.59	0.0617486
3534.77	0.0776377		3534.77	0.0610918
3535.94	0.0773597		3535.94	0.0607609
3537.11	0.077893		3537.11	0.0607402
3538.28	0.0787601		3538.28	0.0616757
3539.45	0.0792761		3539.45	0.0623305
3540.62	0.0793044		3540.62	0.0618851
3541.8	0.0788833		3541.8	0.0617683
3542.97	0.0782392		3542.97	0.0621961
3544.14	0.0786735		3544.14	0.0624436
3545.31	0.0799799		3545.31	0.0622336
3546.48	0.0808155		3546.48	0.0618878
3547.66	0.0808801		3547.66	0.0619457
3548.83	0.0809485		3548.83	0.0625548
3550	0.0813142		3550	0.0631076
3551.17	0.0810414		3551.17	0.0625839
3552.34	0.0804303		3552.34	0.0616036
3553.52	0.0798762		3553.52	0.0610774
3554.69	0.0794239		3554.69	0.0604755
3555.86	0.079639		3555.86	0.0599086
3557.03	0.0801358		3557.03	0.0601073
3558.2	0.0805666		3558.2	0.0611061
3559.38	0.0812011		3559.38	0.0622874
3560.55	0.0814446		3560.55	0.0631787
3561.72	0.0810383		3561.72	0.06368
3562.89	0.0804243		3562.89	0.0637177
3564.06	0.0798155		3564.06	0.063457
3565.23	0.0794442		3565.23	0.0633301
3566.41	0.0791977		3566.41	0.0631564
3567.58	0.0792001		3567.58	0.0627304
3568.75	0.0798371		3568.75	0.0625658
3569.92	0.0806309		3569.92	0.0624019
3571.09	0.0811721		3571.09	0.0620251
3572.27	0.0818318		3572.27	0.0618236
3573.44	0.0820464		3573.44	0.0618272
3574.61	0.0809822		3574.61	0.0617691
3575.78	0.0798439		3575.78	0.0618365
3576.95	0.0794555		3576.95	0.0623184
3578.12	0.078933		3578.12	0.0628402
3579.3	0.0784036		3579.3	0.0629258
3580.47	0.0785696		3580.47	0.0626028
3581.64	0.0796451		3581.64	0.0630915
3582.81	0.0808232		3582.81	0.0640934
3583.98	0.0814215		3583.98	0.0639015
3585.16	0.0813624		3585.16	0.0628942
3586.33	0.0807095		3586.33	0.0621602
3587.5	0.0802724		3587.5	0.0621172
3588.67	0.0800485		3588.67	0.0623701
3589.84	0.0799457		3589.84	0.0624854
3591.02	0.0800908		3591.02	0.0624934
3592.19	0.0803863		3592.19	0.0624384
3593.36	0.0812019		3593.36	0.0627893
3594.53	0.0817623		3594.53	0.0633983
3595.7	0.081219		3595.7	0.063626
3596.88	0.0805169		3596.88	0.0634128
3598.05	0.0800926		3598.05	0.0627203
3599.22	0.0797865		3599.22	0.0619421
3600.39	0.0797459		3600.39	0.0617497
3601.56	0.0799447		3601.56	0.0621635
3602.73	0.0802162		3602.73	0.0627252
3603.91	0.0801256		3603.91	0.0628462
3605.08	0.0800443		3605.08	0.0623281
3606.25	0.0804342		3606.25	0.0614315
3607.42	0.0811111		3607.42	0.0610194
3608.59	0.082151		3608.59	0.0611791
3609.77	0.082797		3609.77	0.0612664
3610.94	0.0817477		3610.94	0.0617344
3612.11	0.080082		3612.11	0.0625614
3613.28	0.0793171		3613.28	0.0630888
3614.45	0.0794459		3614.45	0.0633127
3615.62	0.0804292		3615.62	0.0634911
3616.8	0.0812934		3616.8	0.0635318
3617.97	0.0813407		3617.97	0.0628945
3619.14	0.0811972		3619.14	0.0620187
3620.31	0.0812149		3620.31	0.0614004
3621.48	0.081156		3621.48	0.0612733
3622.66	0.0808229		3622.66	0.0615637
3623.83	0.0801589		3623.83	0.0612422
3625	0.0793756		3625	0.0609315
3626.17	0.0792827		3626.17	0.0614364
3627.34	0.0799		3627.34	0.0620071
3628.52	0.0801352		3628.52	0.0619392
3629.69	0.0800487		3629.69	0.0614891
3630.86	0.0799727		3630.86	0.0614951
3632.03	0.0798653		3632.03	0.0621006
3633.2	0.0803047		3633.2	0.0625178
3634.38	0.0805349		3634.38	0.0622854
3635.55	0.0805642		3635.55	0.0623121
3636.72	0.0811078		3636.72	0.0632591
3637.89	0.0814201		3637.89	0.0642424
3639.06	0.0814291		3639.06	0.064097
3640.23	0.0812816		3640.23	0.0633849
3641.41	0.0813273		3641.41	0.063105
3642.58	0.0818233		3642.58	0.0630572
3643.75	0.0820325		3643.75	0.0629591
3644.92	0.0817451		3644.92	0.0630258
3646.09	0.0814035		3646.09	0.0633302
3647.27	0.081241		3647.27	0.0634308
3648.44	0.0808204		3648.44	0.063441
3649.61	0.0805381		3649.61	0.063392
3650.78	0.0810562		3650.78	0.0631335
3651.95	0.081396		3651.95	0.062862
3653.12	0.0812951		3653.12	0.0627913
3654.3	0.081344		3654.3	0.0625498
3655.47	0.0815532		3655.47	0.0617626
3656.64	0.0818317		3656.64	0.0616067
3657.81	0.0823397		3657.81	0.0621812
3658.98	0.0823778		3658.98	0.062226
3660.16	0.0815001		3660.16	0.0620651
3661.33	0.0808713		3661.33	0.0622697
3662.5	0.0808984		3662.5	0.0626386
3663.67	0.0809627		3663.67	0.0630699
3664.84	0.0808288		3664.84	0.0633274
3666.02	0.0805373		3666.02	0.0632881
3667.19	0.0805668		3667.19	0.0630814
3668.36	0.0810484		3668.36	0.063262
3669.53	0.0812065		3669.53	0.0635393
3670.7	0.0810613		3670.7	0.0632041
3671.88	0.081267		3671.88	0.0631152
3673.05	0.0815981		3673.05	0.0635986
3674.22	0.0817345		3674.22	0.0637749
3675.39	0.0816915		3675.39	0.0635951
3676.56	0.0815466		3676.56	0.0637548
3677.73	0.0818069		3677.73	0.0637987
3678.91	0.0818306		3678.91	0.0632946
3680.08	0.0813333		3680.08	0.0631556
3681.25	0.0815725		3681.25	0.0632461
3682.42	0.0821027		3682.42	0.0633409
3683.59	0.0822133		3683.59	0.063951
3684.77	0.082546		3684.77	0.064455
3685.94	0.082741		3685.94	0.0644245
3687.11	0.0828758		3687.11	0.0640496
3688.28	0.0836355		3688.28	0.0639926
3689.45	0.0840516		3689.45	0.0644485
3690.62	0.0834326		3690.62	0.064404
3691.8	0.0824698		3691.8	0.0642781
3692.97	0.0820371		3692.97	0.0643408
3694.14	0.0821098		3694.14	0.0637942
3695.31	0.0820369		3695.31	0.0634749
3696.48	0.0817637		3696.48	0.0639413
3697.66	0.0817407		3697.66	0.0645106
3698.83	0.0819199		3698.83	0.0648212
