# Supplementary material for: A moonlighting function of a chitin polysaccharide monooxygenase, CWR-1, in Neurospora crassa allorecognition
Source: eLife. 2022 Aug 30;11:e80459. doi: 10.7554/eLife.80459 (PMC9550227; doi:10.7554/eLife.80459)
Supplement: Figure 5—source data 1. — Blank subtracted HPAEC-PAD traces. The samples were prepared as described in ‘Materials and methods.’ The time and nC response are listed in the table. [file elife-80459-fig5-data1.xlsx]

## Sheet: Sheet1
Figure 5A Source Data (HG1 and Variants on β-Chitin )
β-Chitin		β-Chitin + Asc.		HG1		HG1 H20A		HG1 H78A		HG1 Y159A		HG1 H20AH78A
time	nC	time	nC	time	nC	time	nC	time	nC	time	nC	time	nC
0.000167	0.04	0.000333	-0.0953	0	-0.0055	0.000333	-0.13755	0.000167	-0.0632	0.000333	-0.2916	0.000333	0.0474
0.0085	0.0516	0.008667	-0.0675	0.008333	-0.00635	0.008667	-0.12035	0.0085	-0.05705	0.008667	-0.2922	0.008667	0.05005
0.016833	0.0469	0.017	-0.06275	0.016667	-0.006	0.017	-0.1077	0.016833	-0.05745	0.017	-0.29645	0.017	0.0514
0.025167	0.0473	0.025333	-0.0622	0.025	-0.00375	0.025333	-0.1012	0.025167	-0.0557	0.025333	-0.2914	0.025333	0.0576
0.0335	0.0491	0.033667	-0.06385	0.033333	-0.00485	0.033667	-0.10145	0.0335	-0.0569	0.033667	-0.28775	0.033667	0.05955
0.041833	0.04945	0.042	-0.0655	0.041667	-0.00415	0.042	-0.1007	0.041833	-0.05765	0.042	-0.28635	0.042	0.06195
0.050167	0.0515	0.050333	-0.06565	0.05	-0.00325	0.050333	-0.1026	0.050167	-0.05745	0.050333	-0.28485	0.050333	0.0638
0.0585	0.0511	0.058667	-0.06675	0.058333	-0.0042	0.058667	-0.10375	0.0585	-0.05555	0.058667	-0.2835	0.058667	0.0628
0.066833	0.0507	0.067	-0.0682	0.066667	-0.0029	0.067	-0.10495	0.066833	-0.05575	0.067	-0.2838	0.067	0.0632
0.075167	0.0496	0.075333	-0.0702	0.075	-0.0023	0.075333	-0.1052	0.075167	-0.0557	0.075333	-0.2839	0.075333	0.06245
0.0835	0.0493	0.083667	-0.0697	0.083333	-0.00295	0.083667	-0.10765	0.0835	-0.0563	0.083667	-0.2837	0.083667	0.06195
0.091833	0.0482	0.092	-0.0711	0.091667	-0.00415	0.092	-0.1067	0.091833	-0.0559	0.092	-0.2834	0.092	0.0615
0.100167	0.0494	0.100333	-0.0718	0.1	-0.0015	0.100333	-0.10575	0.100167	-0.0558	0.100333	-0.2821	0.100333	0.06165
0.1085	0.04975	0.108667	-0.07395	0.108333	-0.00265	0.108667	-0.10605	0.1085	-0.05635	0.108667	-0.28215	0.108667	0.0616
0.116833	0.0493	0.117	-0.07475	0.116667	-0.00265	0.117	-0.10555	0.116833	-0.05555	0.117	-0.28155	0.117	0.061
0.125167	0.0487	0.125333	-0.0778	0.125	-0.00365	0.125333	-0.1095	0.125167	-0.0586	0.125333	-0.28315	0.125333	0.0595
0.1335	0.0474	0.133667	-0.0794	0.133333	-0.00475	0.133667	-0.10855	0.1335	-0.05905	0.133667	-0.281	0.133667	0.05945
0.141833	0.04705	0.142	-0.08045	0.141667	-0.0059	0.142	-0.11185	0.141833	-0.05905	0.142	-0.28275	0.142	0.05825
0.150167	0.04925	0.150333	-0.0794	0.15	-0.00405	0.150333	-0.11295	0.150167	-0.0583	0.150333	-0.28285	0.150333	0.0614
0.1585	0.05085	0.158667	-0.0785	0.158333	-0.0033	0.158667	-0.11205	0.1585	-0.05645	0.158667	-0.28165	0.158667	0.0628
0.166833	0.04925	0.167	-0.0784	0.166667	-0.0026	0.167	-0.10945	0.166833	-0.05745	0.167	-0.2805	0.167	0.06125
0.175167	0.0481	0.175333	-0.07855	0.175	-0.00305	0.175333	-0.1104	0.175167	-0.0574	0.175333	-0.2799	0.175333	0.06205
0.1835	0.0477	0.183667	-0.0812	0.183333	-0.0044	0.183667	-0.1111	0.1835	-0.0575	0.183667	-0.28375	0.183667	0.06285
0.191833	0.04875	0.192	-0.08225	0.191667	-0.0034	0.192	-0.11	0.191833	-0.0578	0.192	-0.28345	0.192	0.06185
0.200167	0.0505	0.200333	-0.08085	0.2	-0.00315	0.200333	-0.1102	0.200167	-0.0571	0.200333	-0.28365	0.200333	0.0644
0.2085	0.04825	0.208667	-0.0812	0.208333	-0.0029	0.208667	-0.11215	0.2085	-0.05625	0.208667	-0.2832	0.208667	0.0652
0.216833	0.0485	0.217	-0.082	0.216667	-0.00325	0.217	-0.1091	0.216833	-0.0575	0.217	-0.28265	0.217	0.0643
0.225167	0.04995	0.225333	-0.08215	0.225	-0.00265	0.225333	-0.1085	0.225167	-0.05705	0.225333	-0.28155	0.225333	0.06365
0.2335	0.0501	0.233667	-0.08255	0.233333	-0.00075	0.233667	-0.10705	0.2335	-0.05635	0.233667	-0.28225	0.233667	0.0652
0.241833	0.05005	0.242	-0.0826	0.241667	-0.0026	0.242	-0.1065	0.241833	-0.0548	0.242	-0.2817	0.242	0.06595
0.250167	0.0509	0.250333	-0.0823	0.25	-0.00155	0.250333	-0.10525	0.250167	-0.05415	0.250333	-0.28045	0.250333	0.066
0.2585	0.0505	0.258667	-0.0819	0.258333	-0.00175	0.258667	-0.10305	0.2585	-0.0563	0.258667	-0.2782	0.258667	0.06605
0.266833	0.0506	0.267	-0.08015	0.266667	0.0009	0.267	-0.10375	0.266833	-0.05325	0.267	-0.2793	0.267	0.0663
0.275167	0.04845	0.275333	-0.0831	0.275	-0.0032	0.275333	-0.1034	0.275167	-0.05545	0.275333	-0.2791	0.275333	0.06555
0.2835	0.04935	0.283667	-0.08385	0.283333	-0.00205	0.283667	-0.1018	0.2835	-0.0556	0.283667	-0.27765	0.283667	0.0652
0.291833	0.04825	0.292	-0.08345	0.291667	-0.0015	0.292	-0.1028	0.291833	-0.05525	0.292	-0.27645	0.292	0.0655
0.300167	0.048	0.300333	-0.08195	0.3	-0.0014	0.300333	-0.1042	0.300167	-0.0541	0.300333	-0.27855	0.300333	0.0655
0.3085	0.04855	0.308667	-0.08195	0.308333	-0.00125	0.308667	-0.10295	0.3085	-0.05345	0.308667	-0.27815	0.308667	0.06635
0.316833	0.04605	0.317	-0.08615	0.316667	-0.0027	0.317	-0.10405	0.316833	-0.0556	0.317	-0.278	0.317	0.064
0.325167	0.04615	0.325333	-0.08625	0.325	-0.00275	0.325333	-0.10475	0.325167	-0.05685	0.325333	-0.27635	0.325333	0.0637
0.3335	0.0475	0.333667	-0.0844	0.333333	-0.0036	0.333667	-0.1057	0.3335	-0.05665	0.333667	-0.2764	0.333667	0.06595
0.341833	0.04895	0.342	-0.08495	0.341667	-0.0021	0.342	-0.10585	0.341833	-0.0551	0.342	-0.2784	0.342	0.06745
0.350167	0.04825	0.350333	-0.08435	0.35	-0.00195	0.350333	-0.1052	0.350167	-0.0558	0.350333	-0.27745	0.350333	0.06805
0.3585	0.0474	0.358667	-0.08495	0.358333	-0.0042	0.358667	-0.10415	0.3585	-0.0555	0.358667	-0.27645	0.358667	0.0687
0.366833	0.0486	0.367	-0.0849	0.366667	-0.0027	0.367	-0.1066	0.366833	-0.0549	0.367	-0.27765	0.367	0.0692
0.375167	0.04975	0.375333	-0.0852	0.375	-0.0034	0.375333	-0.1059	0.375167	-0.0556	0.375333	-0.27945	0.375333	0.06975
0.3835	0.0495	0.383667	-0.08575	0.383333	-0.00405	0.383667	-0.1028	0.3835	-0.05505	0.383667	-0.27725	0.383667	0.06885
0.391833	0.05015	0.392	-0.08505	0.391667	-0.0026	0.392	-0.10415	0.391833	-0.0536	0.392	-0.27815	0.392	0.0695
0.400167	0.04895	0.400333	-0.0857	0.4	-0.00375	0.400333	-0.10425	0.400167	-0.0527	0.400333	-0.28035	0.400333	0.07015
0.4085	0.0492	0.408667	-0.08685	0.408333	-0.0029	0.408667	-0.10235	0.4085	-0.05375	0.408667	-0.2786	0.408667	0.07005
0.416833	0.04845	0.417	-0.08755	0.416667	-0.0041	0.417	-0.1001	0.416833	-0.054	0.417	-0.27695	0.417	0.07035
0.425167	0.04775	0.425333	-0.08675	0.425	-0.0039	0.425333	-0.09895	0.425167	-0.0528	0.425333	-0.27655	0.425333	0.07065
0.4335	0.04905	0.433667	-0.0872	0.433333	-0.0026	0.433667	-0.0989	0.4335	-0.05195	0.433667	-0.2774	0.433667	0.071
0.441833	0.0498	0.442	-0.0882	0.441667	-0.0019	0.442	-0.0985	0.441833	-0.05235	0.442	-0.27615	0.442	0.07115
0.450167	0.0493	0.450333	-0.0872	0.45	-0.0014	0.450333	-0.0987	0.450167	-0.0512	0.450333	-0.2757	0.450333	0.0725
0.4585	0.05	0.458667	-0.08735	0.458333	-0.0022	0.458667	-0.0993	0.4585	-0.05205	0.458667	-0.27515	0.458667	0.0727
0.466833	0.04805	0.467	-0.08665	0.466667	-0.00485	0.467	-0.0955	0.466833	-0.0521	0.467	-0.2765	0.467	0.0717
0.475167	0.04955	0.475333	-0.08665	0.475	-0.0028	0.475333	-0.09475	0.475167	-0.05165	0.475333	-0.2751	0.475333	0.0712
0.4835	0.0491	0.483667	-0.08695	0.483333	-0.00175	0.483667	-0.09365	0.4835	-0.0517	0.483667	-0.27225	0.483667	0.07135
0.491833	0.04695	0.492	-0.0859	0.491667	-0.00295	0.492	-0.09495	0.491833	-0.0515	0.492	-0.27445	0.492	0.0705
0.500167	0.04875	0.500333	-0.0879	0.5	-0.0034	0.500333	-0.0939	0.500167	-0.0513	0.500333	-0.27365	0.500333	0.07065
0.5085	0.04725	0.508667	-0.08895	0.508333	-0.0042	0.508667	-0.0935	0.5085	-0.0527	0.508667	-0.27255	0.508667	0.07125
0.516833	0.045	0.517	-0.09055	0.516667	-0.00675	0.517	-0.09695	0.516833	-0.05315	0.517	-0.2758	0.517	0.06985
0.525167	0.0488	0.525333	-0.08655	0.525	-0.0032	0.525333	-0.09805	0.525167	-0.0509	0.525333	-0.2751	0.525333	0.07375
0.5335	0.05115	0.533667	-0.08475	0.533333	-0.00115	0.533667	-0.0985	0.5335	-0.05135	0.533667	-0.27595	0.533667	0.075
0.541833	0.0488	0.542	-0.08655	0.541667	-0.00415	0.542	-0.0984	0.541833	-0.05255	0.542	-0.27435	0.542	0.07425
0.550167	0.04755	0.550333	-0.08785	0.55	-0.00485	0.550333	-0.0977	0.550167	-0.05295	0.550333	-0.27425	0.550333	0.07315
0.5585	0.0482	0.558667	-0.08835	0.558333	-0.0043	0.558667	-0.09665	0.5585	-0.05215	0.558667	-0.27505	0.558667	0.07515
0.566833	0.04985	0.567	-0.08845	0.566667	-0.00535	0.567	-0.09735	0.566833	-0.0528	0.567	-0.2761	0.567	0.0748
0.575167	0.04905	0.575333	-0.0883	0.575	-0.00575	0.575333	-0.09695	0.575167	-0.05285	0.575333	-0.27645	0.575333	0.07265
0.5835	0.04795	0.583667	-0.08835	0.583333	-0.00605	0.583667	-0.0959	0.5835	-0.05215	0.583667	-0.27625	0.583667	0.0723
0.591833	0.04755	0.592	-0.08875	0.591667	-0.00475	0.592	-0.0947	0.591833	-0.05215	0.592	-0.2753	0.592	0.073
0.600167	0.04875	0.600333	-0.0899	0.6	-0.0042	0.600333	-0.0929	0.600167	-0.0515	0.600333	-0.27315	0.600333	0.0748
0.6085	0.0499	0.608667	-0.0871	0.608333	-0.0018	0.608667	-0.0944	0.6085	-0.049	0.608667	-0.27275	0.608667	0.07785
0.616833	0.04985	0.617	-0.0887	0.616667	-0.00325	0.617	-0.0916	0.616833	-0.04965	0.617	-0.2721	0.617	0.07765
0.625167	0.0508	0.625333	-0.08755	0.625	-0.0019	0.625333	-0.0901	0.625167	-0.04845	0.625333	-0.271	0.625333	0.0766
0.6335	0.0508	0.633667	-0.08775	0.633333	-0.00245	0.633667	-0.09065	0.6335	-0.0493	0.633667	-0.2727	0.633667	0.07635
0.641833	0.05095	0.642	-0.0863	0.641667	-0.0008	0.642	-0.0915	0.641833	-0.04715	0.642	-0.27195	0.642	0.0772
0.650167	0.05035	0.650333	-0.08855	0.65	-0.0033	0.650333	-0.0918	0.650167	-0.0485	0.650333	-0.27165	0.650333	0.07735
0.6585	0.049	0.658667	-0.08925	0.658333	-0.0031	0.658667	-0.0896	0.6585	-0.0486	0.658667	-0.27035	0.658667	0.07795
0.666833	0.05075	0.667	-0.08755	0.666667	-0.00045	0.667	-0.09025	0.666833	-0.04815	0.667	-0.2693	0.667	0.0765
0.675167	0.04985	0.675333	-0.08805	0.675	-0.002	0.675333	-0.0892	0.675167	-0.04805	0.675333	-0.27015	0.675333	0.0764
0.6835	0.04925	0.683667	-0.0884	0.683333	-0.0022	0.683667	-0.0894	0.6835	-0.04815	0.683667	-0.26935	0.683667	0.07675
0.691833	0.04855	0.692	-0.0891	0.691667	-0.00225	0.692	-0.09035	0.691833	-0.04945	0.692	-0.27045	0.692	0.07645
0.700167	0.04885	0.700333	-0.08945	0.7	-0.00325	0.700333	-0.09245	0.700167	-0.04975	0.700333	-0.26975	0.700333	0.07495
0.7085	0.04825	0.708667	-0.0892	0.708333	-0.0042	0.708667	-0.0912	0.7085	-0.05025	0.708667	-0.27065	0.708667	0.0754
0.716833	0.05005	0.717	-0.08655	0.716667	-0.002	0.717	-0.0914	0.716833	-0.0476	0.717	-0.26965	0.717	0.07835
0.725167	0.04855	0.725333	-0.08785	0.725	-0.00385	0.725333	-0.0916	0.725167	-0.04795	0.725333	-0.27045	0.725333	0.07655
0.7335	0.0481	0.733667	-0.0896	0.733333	-0.0047	0.733667	-0.09105	0.7335	-0.0496	0.733667	-0.2695	0.733667	0.0769
0.741833	0.04835	0.742	-0.08925	0.741667	-0.0042	0.742	-0.09045	0.741833	-0.0482	0.742	-0.2727	0.742	0.0776
0.750167	0.0498	0.750333	-0.09115	0.75	-0.005	0.750333	-0.09085	0.750167	-0.04985	0.750333	-0.273	0.750333	0.07665
0.7585	0.04935	0.758667	-0.0917	0.758333	-0.0051	0.758667	-0.0904	0.7585	-0.04955	0.758667	-0.2732	0.758667	0.0749
0.766833	0.04845	0.767	-0.09265	0.766667	-0.00415	0.767	-0.0899	0.766833	-0.0491	0.767	-0.27155	0.767	0.0758
0.775167	0.04905	0.775333	-0.0906	0.775	-0.0025	0.775333	-0.0906	0.775167	-0.04835	0.775333	-0.27335	0.775333	0.07935
0.7835	0.05015	0.783667	-0.0907	0.783333	-0.003	0.783667	-0.09075	0.7835	-0.04665	0.783667	-0.27165	0.783667	0.0789
0.791833	0.04965	0.792	-0.0902	0.791667	-0.0034	0.792	-0.0882	0.791833	-0.04605	0.792	-0.2701	0.792	0.0767
0.800167	0.05095	0.800333	-0.09055	0.8	-0.002	0.800333	-0.08585	0.800167	-0.04705	0.800333	-0.2709	0.800333	0.0787
0.8085	0.04935	0.808667	-0.0922	0.808333	-0.0033	0.808667	-0.08475	0.8085	-0.04565	0.808667	-0.2692	0.808667	0.07705
0.816833	0.05	0.817	-0.09155	0.816667	-0.00505	0.817	-0.0835	0.816833	-0.047	0.817	-0.26755	0.817	0.07685
0.825167	0.0485	0.825333	-0.0909	0.825	-0.0031	0.825333	-0.0859	0.825167	-0.0478	0.825333	-0.2682	0.825333	0.07735
0.8335	0.04885	0.833667	-0.09	0.833333	-0.004	0.833667	-0.0849	0.8335	-0.0466	0.833667	-0.26795	0.833667	0.0773
0.841833	0.0495	0.842	-0.0911	0.841667	-0.00405	0.842	-0.08395	0.841833	-0.0459	0.842	-0.2657	0.842	0.07705
0.850167	0.04885	0.850333	-0.0911	0.85	-0.0034	0.850333	-0.08275	0.850167	-0.04585	0.850333	-0.26725	0.850333	0.07695
0.8585	0.0493	0.858667	-0.09185	0.858333	-0.0029	0.858667	-0.0819	0.8585	-0.04645	0.858667	-0.26485	0.858667	0.07875
0.866833	0.0479	0.867	-0.09085	0.866667	-0.0036	0.867	-0.0814	0.866833	-0.045	0.867	-0.2659	0.867	0.077
0.875167	0.0481	0.875333	-0.0927	0.875	-0.0032	0.875333	-0.0821	0.875167	-0.0468	0.875333	-0.2673	0.875333	0.07795
0.8835	0.04815	0.883667	-0.0928	0.883333	-0.00415	0.883667	-0.08245	0.8835	-0.04685	0.883667	-0.2667	0.883667	0.0778
0.891833	0.04825	0.892	-0.0931	0.891667	-0.00435	0.892	-0.0838	0.891833	-0.04755	0.892	-0.26575	0.892	0.076
0.900167	0.04705	0.900333	-0.0919	0.9	-0.0042	0.900333	-0.08295	0.900167	-0.0471	0.900333	-0.26595	0.900333	0.07865
0.9085	0.05055	0.908667	-0.0919	0.908333	-0.00545	0.908667	-0.08535	0.9085	-0.0458	0.908667	-0.26535	0.908667	0.07955
0.916833	0.0489	0.917	-0.0917	0.916667	-0.0044	0.917	-0.08235	0.916833	-0.04665	0.917	-0.2655	0.917	0.0776
0.925167	0.0485	0.925333	-0.09225	0.925	-0.0054	0.925333	-0.08305	0.925167	-0.0468	0.925333	-0.2659	0.925333	0.07735
0.9335	0.05005	0.933667	-0.0938	0.933333	-0.00475	0.933667	-0.08515	0.9335	-0.04615	0.933667	-0.26825	0.933667	0.07945
0.941833	0.0491	0.942	-0.0945	0.941667	-0.00675	0.942	-0.08545	0.941833	-0.04665	0.942	-0.26845	0.942	0.0791
0.950167	0.0486	0.950333	-0.09385	0.95	-0.00595	0.950333	-0.086	0.950167	-0.0471	0.950333	-0.27045	0.950333	0.0784
0.9585	0.04875	0.958667	-0.09545	0.958333	-0.00515	0.958667	-0.0841	0.9585	-0.0466	0.958667	-0.26905	0.958667	0.07885
0.966833	0.04955	0.967	-0.09365	0.966667	-0.00445	0.967	-0.08325	0.966833	-0.0453	0.967	-0.26865	0.967	0.0809
0.975167	0.05115	0.975333	-0.0929	0.975	-0.00325	0.975333	-0.08355	0.975167	-0.0456	0.975333	-0.26875	0.975333	0.08155
0.9835	0.05225	0.983667	-0.09355	0.983333	-0.00465	0.983667	-0.0825	0.9835	-0.0444	0.983667	-0.26855	0.983667	0.0826
0.991833	0.05285	0.992	-0.09175	0.991667	-0.00305	0.992	-0.083	0.991833	-0.04255	0.992	-0.2697	0.992	0.0836
1.00017	0.05195	1.00033	-0.09355	1	-0.004	1.00033	-0.0816	1.00017	-0.04465	1.00033	-0.26855	1.00033	0.0809
1.0085	0.05275	1.00867	-0.09155	1.00833	-0.0025	1.00867	-0.07955	1.0085	-0.0444	1.00867	-0.2669	1.00867	0.08215
1.01683	0.05075	1.017	-0.0929	1.01667	-0.00235	1.017	-0.08355	1.01683	-0.04405	1.017	-0.2692	1.017	0.08275
1.02517	0.0511	1.02533	-0.09195	1.025	-0.00275	1.02533	-0.08135	1.02517	-0.043	1.02533	-0.26875	1.02533	0.08075
1.0335	0.051	1.03367	-0.09185	1.03333	-0.00255	1.03367	-0.0819	1.0335	-0.0431	1.03367	-0.26825	1.03367	0.08105
1.04183	0.05025	1.042	-0.0936	1.04167	-0.0025	1.042	-0.08045	1.04183	-0.0438	1.042	-0.2666	1.042	0.08025
1.05017	0.0482	1.05033	-0.0942	1.05	-0.0037	1.05033	-0.07985	1.05017	-0.0439	1.05033	-0.26615	1.05033	0.08035
1.0585	0.0497	1.05867	-0.0927	1.05833	-0.00315	1.05867	-0.08155	1.0585	-0.04355	1.05867	-0.2701	1.05867	0.08125
1.06683	0.04915	1.067	-0.09415	1.06667	-0.00235	1.067	-0.0812	1.06683	-0.0433	1.067	-0.2674	1.067	0.08045
1.07517	0.04925	1.07533	-0.09325	1.075	-0.00295	1.07533	-0.0804	1.07517	-0.04405	1.07533	-0.266	1.07533	0.08025
1.0835	0.0496	1.08367	-0.0928	1.08333	-0.0021	1.08367	-0.0842	1.0835	-0.04425	1.08367	-0.26805	1.08367	0.0831
1.09183	0.05045	1.092	-0.09345	1.09167	-0.0038	1.092	-0.0834	1.09183	-0.04345	1.092	-0.268	1.092	0.08345
1.10017	0.0502	1.10033	-0.0934	1.1	-0.00375	1.10033	-0.08285	1.10017	-0.04375	1.10033	-0.2667	1.10033	0.08205
1.1085	0.04935	1.10867	-0.09315	1.10833	-0.00575	1.10867	-0.08095	1.1085	-0.04445	1.10867	-0.26625	1.10867	0.08265
1.11683	0.04945	1.117	-0.09305	1.11667	-0.0052	1.117	-0.0813	1.11683	-0.0427	1.117	-0.26725	1.117	0.0844
1.12517	0.04725	1.12533	-0.0954	1.125	-0.00595	1.12533	-0.08105	1.12517	-0.04535	1.12533	-0.2677	1.12533	0.0829
1.1335	0.0483	1.13367	-0.0954	1.13333	-0.0074	1.13367	-0.0825	1.1335	-0.04575	1.13367	-0.269	1.13367	0.08195
1.14183	0.04835	1.142	-0.09455	1.14167	-0.00605	1.142	-0.0824	1.14183	-0.0442	1.142	-0.27035	1.142	0.08335
1.15017	0.0488	1.15033	-0.0938	1.15	-0.00555	1.15033	-0.0822	1.15017	-0.04325	1.15033	-0.26865	1.15033	0.0852
1.1585	0.04875	1.15867	-0.09415	1.15833	-0.0041	1.15867	-0.08105	1.1585	-0.0434	1.15867	-0.26795	1.15867	0.0858
1.16683	0.04875	1.167	-0.09605	1.16667	-0.00495	1.167	-0.08	1.16683	-0.0435	1.167	-0.2687	1.167	0.08455
1.17517	0.04965	1.17533	-0.09385	1.175	-0.0037	1.17533	-0.07945	1.17517	-0.04235	1.17533	-0.26765	1.17533	0.08675
1.1835	0.05105	1.18367	-0.09405	1.18333	-0.0041	1.18367	-0.07855	1.1835	-0.0412	1.18367	-0.26635	1.18367	0.0864
1.19183	0.05085	1.192	-0.0935	1.19167	-0.00415	1.192	-0.07705	1.19183	-0.04155	1.192	-0.26475	1.192	0.0859
1.20017	0.05065	1.20033	-0.09485	1.2	-0.0031	1.20033	-0.077	1.20017	-0.04205	1.20033	-0.2658	1.20033	0.0863
1.2085	0.04915	1.20867	-0.09425	1.20833	-0.00405	1.20867	-0.0774	1.2085	-0.0427	1.20867	-0.2647	1.20867	0.0856
1.21683	0.04795	1.217	-0.09385	1.21667	-0.0053	1.217	-0.0772	1.21683	-0.04135	1.217	-0.26305	1.217	0.0861
1.22517	0.0467	1.22533	-0.09485	1.225	-0.0052	1.22533	-0.0789	1.22517	-0.04275	1.22533	-0.2642	1.22533	0.08525
1.2335	0.04865	1.23367	-0.09345	1.23333	-0.0048	1.23367	-0.07955	1.2335	-0.0403	1.23367	-0.2622	1.23367	0.0857
1.24183	0.04755	1.242	-0.09425	1.24167	-0.00575	1.242	-0.07845	1.24183	-0.04305	1.242	-0.26455	1.242	0.0836
1.25017	0.04805	1.25033	-0.0932	1.25	-0.0048	1.25033	-0.07695	1.25017	-0.04295	1.25033	-0.26435	1.25033	0.08535
1.2585	0.0493	1.25867	-0.09505	1.25833	-0.0041	1.25867	-0.07905	1.2585	-0.0426	1.25867	-0.264	1.25867	0.08525
1.26683	0.0471	1.267	-0.0945	1.26667	-0.0053	1.267	-0.07905	1.26683	-0.043	1.267	-0.2639	1.267	0.08475
1.27517	0.0489	1.27533	-0.09365	1.275	-0.00505	1.27533	-0.07955	1.27517	-0.0424	1.27533	-0.2633	1.27533	0.085
1.2835	0.0493	1.28367	-0.0933	1.28333	-0.0045	1.28367	-0.07985	1.2835	-0.04285	1.28367	-0.26395	1.28367	0.0866
1.29183	0.04875	1.292	-0.0931	1.29167	-0.00495	1.292	-0.0792	1.29183	-0.0447	1.292	-0.2635	1.292	0.08735
1.30017	0.04775	1.30033	-0.0941	1.3	-0.00595	1.30033	-0.07955	1.30017	-0.0425	1.30033	-0.2638	1.30033	0.0869
1.3085	0.0483	1.30867	-0.0947	1.30833	-0.00535	1.30867	-0.08105	1.3085	-0.0426	1.30867	-0.2663	1.30867	0.0872
1.31683	0.04905	1.317	-0.0952	1.31667	-0.0057	1.317	-0.0799	1.31683	-0.0428	1.317	-0.26645	1.317	0.0873
1.32517	0.04905	1.32533	-0.09625	1.325	-0.00625	1.32533	-0.08045	1.32517	-0.0432	1.32533	-0.26675	1.32533	0.08515
1.3335	0.048	1.33367	-0.0959	1.33333	-0.00585	1.33367	-0.0805	1.3335	-0.0434	1.33367	-0.2692	1.33367	0.0862
1.34183	0.0493	1.342	-0.09505	1.34167	-0.0043	1.342	-0.0778	1.34183	-0.0425	1.342	-0.2675	1.342	0.087
1.35017	0.049	1.35033	-0.09585	1.35	-0.00475	1.35033	-0.07815	1.35017	-0.0426	1.35033	-0.26665	1.35033	0.08565
1.3585	0.04875	1.35867	-0.0948	1.35833	-0.0053	1.35867	-0.07605	1.3585	-0.0428	1.35867	-0.2646	1.35867	0.08785
1.36683	0.0482	1.367	-0.0964	1.36667	-0.00585	1.367	-0.07675	1.36683	-0.04195	1.367	-0.26615	1.367	0.08675
1.37517	0.0499	1.37533	-0.09575	1.375	-0.00355	1.37533	-0.07655	1.37517	-0.0408	1.37533	-0.26485	1.37533	0.0884
1.3835	0.049	1.38367	-0.0954	1.38333	-0.00505	1.38367	-0.07515	1.3835	-0.04025	1.38367	-0.26405	1.38367	0.08815
1.39183	0.04975	1.392	-0.0944	1.39167	-0.00345	1.392	-0.07605	1.39183	-0.0403	1.392	-0.26295	1.392	0.0876
1.40017	0.04895	1.40033	-0.0963	1.4	-0.0061	1.40033	-0.0759	1.40017	-0.0424	1.40033	-0.26265	1.40033	0.0877
1.4085	0.04915	1.40867	-0.0963	1.40833	-0.0056	1.40867	-0.07435	1.4085	-0.0417	1.40867	-0.26345	1.40867	0.0867
1.41683	0.0467	1.417	-0.09615	1.41667	-0.0044	1.417	-0.07385	1.41683	-0.0414	1.417	-0.2618	1.417	0.0864
1.42517	0.04885	1.42533	-0.0948	1.425	-0.0033	1.42533	-0.07225	1.42517	-0.04095	1.42533	-0.26345	1.42533	0.0876
1.4335	0.0477	1.43367	-0.09465	1.43333	-0.0034	1.43367	-0.0761	1.4335	-0.04065	1.43367	-0.2649	1.43367	0.0879
1.44183	0.04785	1.442	-0.0975	1.44167	-0.0036	1.442	-0.07425	1.44183	-0.0427	1.442	-0.2655	1.442	0.0863
1.45017	0.04815	1.45033	-0.0964	1.45	-0.0031	1.45033	-0.07625	1.45017	-0.04025	1.45033	-0.2645	1.45033	0.08795
1.4585	0.04645	1.45867	-0.0969	1.45833	-0.00545	1.45867	-0.07725	1.4585	-0.04155	1.45867	-0.26545	1.45867	0.0865
1.46683	0.0474	1.467	-0.097	1.46667	-0.00545	1.467	-0.08005	1.46683	-0.0414	1.467	-0.26665	1.467	0.08825
1.47517	0.048	1.47533	-0.09625	1.475	-0.0051	1.47533	-0.0777	1.47517	-0.0416	1.47533	-0.26445	1.47533	0.0882
1.4835	0.0474	1.48367	-0.0963	1.48333	-0.00605	1.48367	-0.0758	1.4835	-0.04105	1.48367	-0.26275	1.48367	0.08785
1.49183	0.04805	1.492	-0.0975	1.49167	-0.00635	1.492	-0.07815	1.49183	-0.0416	1.492	-0.2667	1.492	0.08915
1.50017	0.0482	1.50033	-0.09765	1.5	-0.00675	1.50033	-0.0796	1.50017	-0.04275	1.50033	-0.26665	1.50033	0.08875
1.5085	0.04695	1.50867	-0.1004	1.50833	-0.00885	1.50867	-0.0795	1.5085	-0.0442	1.50867	-0.26795	1.50867	0.0877
1.51683	0.04795	1.517	-0.0992	1.51667	-0.0064	1.517	-0.0773	1.51683	-0.04225	1.517	-0.2658	1.517	0.08795
1.52517	0.04815	1.52533	-0.09805	1.525	-0.0061	1.52533	-0.0765	1.52517	-0.0408	1.52533	-0.2665	1.52533	0.08925
1.5335	0.04905	1.53367	-0.0966	1.53333	-0.00485	1.53367	-0.07825	1.5335	-0.04025	1.53367	-0.26795	1.53367	0.08945
1.54183	0.04885	1.542	-0.0968	1.54167	-0.00465	1.542	-0.0776	1.54183	-0.04125	1.542	-0.26645	1.542	0.0885
1.55017	0.04975	1.55033	-0.09825	1.55	-0.0058	1.55033	-0.077	1.55017	-0.04135	1.55033	-0.26455	1.55033	0.08915
1.5585	0.04915	1.55867	-0.0987	1.55833	-0.00515	1.55867	-0.0762	1.5585	-0.04135	1.55867	-0.26345	1.55867	0.08875
1.56683	0.05015	1.567	-0.0982	1.56667	-0.00585	1.567	-0.0739	1.56683	-0.0415	1.567	-0.26395	1.567	0.08785
1.57517	0.04985	1.57533	-0.0969	1.575	-0.0034	1.57533	-0.0752	1.57517	-0.0409	1.57533	-0.264	1.57533	0.08905
1.5835	0.04945	1.58367	-0.0974	1.58333	-0.00375	1.58367	-0.076	1.5835	-0.03925	1.58367	-0.26225	1.58367	0.08905
1.59183	0.04705	1.592	-0.0979	1.59167	-0.0044	1.592	-0.0761	1.59183	-0.04065	1.592	-0.26375	1.592	0.08825
1.60017	0.0486	1.60033	-0.09685	1.6	-0.00445	1.60033	-0.0737	1.60017	-0.04065	1.60033	-0.26425	1.60033	0.08895
1.6085	0.04845	1.60867	-0.0964	1.60833	-0.0035	1.60867	-0.07405	1.6085	-0.0395	1.60867	-0.2646	1.60867	0.08955
1.61683	0.0477	1.617	-0.0969	1.61667	-0.00505	1.617	-0.07395	1.61683	-0.0408	1.617	-0.2648	1.617	0.08745
1.62517	0.045	1.62533	-0.09985	1.625	-0.0057	1.62533	-0.0749	1.62517	-0.04315	1.62533	-0.26555	1.62533	0.0885
1.6335	0.0449	1.63367	-0.10185	1.63333	-0.0067	1.63367	-0.07435	1.6335	-0.0445	1.63367	-0.2642	1.63367	0.08635
1.64183	0.0445	1.642	-0.10265	1.64167	-0.00795	1.642	-0.0777	1.64183	-0.0459	1.642	-0.264	1.642	0.08685
1.65017	0.0465	1.65033	-0.10155	1.65	-0.0059	1.65033	-0.07905	1.65017	-0.0429	1.65033	-0.2652	1.65033	0.08905
1.6585	0.04595	1.65867	-0.10055	1.65833	-0.0057	1.65867	-0.0787	1.6585	-0.0424	1.65867	-0.2653	1.65867	0.0882
1.66683	0.0458	1.667	-0.09765	1.66667	-0.00765	1.667	-0.07855	1.66683	-0.04365	1.667	-0.26525	1.667	0.0874
1.67517	0.0473	1.67533	-0.0956	1.675	-0.0057	1.67533	-0.0771	1.67517	-0.0418	1.67533	-0.26495	1.67533	0.0905
1.6835	0.04625	1.68367	-0.09765	1.68333	-0.0063	1.68367	-0.07845	1.6835	-0.04315	1.68367	-0.26835	1.68367	0.08885
1.69183	0.04685	1.692	-0.09695	1.69167	-0.0088	1.692	-0.07815	1.69183	-0.04385	1.692	-0.2665	1.692	0.0886
1.70017	0.0449	1.70033	-0.09965	1.7	-0.0091	1.70033	-0.07705	1.70017	-0.04335	1.70033	-0.2669	1.70033	0.0871
1.7085	0.04585	1.70867	-0.09965	1.70833	-0.0111	1.70867	-0.07915	1.7085	-0.04435	1.70867	-0.2678	1.70867	0.0888
1.71683	0.0467	1.717	-0.10045	1.71667	-0.00925	1.717	-0.0774	1.71683	-0.04415	1.717	-0.26805	1.717	0.09
1.72517	0.04815	1.72533	-0.09975	1.725	-0.007	1.72533	-0.07605	1.72517	-0.04365	1.72533	-0.2656	1.72533	0.09
1.7335	0.04805	1.73367	-0.0994	1.73333	-0.0079	1.73367	-0.07475	1.7335	-0.0429	1.73367	-0.26505	1.73367	0.0903
1.74183	0.04755	1.742	-0.09975	1.74167	-0.00765	1.742	-0.07585	1.74183	-0.04235	1.742	-0.26455	1.742	0.0916
1.75017	0.04855	1.75033	-0.1	1.75	-0.00695	1.75033	-0.07485	1.75017	-0.0435	1.75033	-0.2643	1.75033	0.0917
1.7585	0.04615	1.75867	-0.10055	1.75833	-0.00755	1.75867	-0.07345	1.7585	-0.04375	1.75867	-0.264	1.75867	0.0905
1.76683	0.04745	1.767	-0.1001	1.76667	-0.0057	1.767	-0.0745	1.76683	-0.0423	1.767	-0.2617	1.767	0.09005
1.77517	0.04585	1.77533	-0.09925	1.775	-0.00715	1.77533	-0.07285	1.77517	-0.0418	1.77533	-0.2615	1.77533	0.09005
1.7835	0.04425	1.78367	-0.1016	1.78333	-0.009	1.78367	-0.07345	1.7835	-0.0443	1.78367	-0.26355	1.78367	0.08885
1.79183	0.0462	1.792	-0.1011	1.79167	-0.0082	1.792	-0.07055	1.79183	-0.0421	1.792	-0.26185	1.792	0.08995
1.80017	0.0456	1.80033	-0.09965	1.8	-0.0068	1.80033	-0.07155	1.80017	-0.04225	1.80033	-0.26355	1.80033	0.0897
1.8085	0.0456	1.80867	-0.0998	1.80833	-0.00795	1.80867	-0.07395	1.8085	-0.04355	1.80867	-0.26585	1.80867	0.0907
1.81683	0.0438	1.817	-0.1021	1.81667	-0.0075	1.817	-0.0744	1.81683	-0.0444	1.817	-0.26425	1.817	0.0899
1.82517	0.04335	1.82533	-0.1012	1.825	-0.0094	1.82533	-0.0763	1.82517	-0.04505	1.82533	-0.26435	1.82533	0.0883
1.8335	0.04345	1.83367	-0.1019	1.83333	-0.00995	1.83367	-0.0785	1.8335	-0.04475	1.83367	-0.2642	1.83367	0.08985
1.84183	0.04505	1.842	-0.1	1.84167	-0.0082	1.842	-0.0788	1.84183	-0.04405	1.842	-0.26375	1.842	0.0919
1.85017	0.04655	1.85033	-0.0988	1.85	-0.0079	1.85033	-0.079	1.85017	-0.0432	1.85033	-0.26115	1.85033	0.09265
1.8585	0.0455	1.85867	-0.101	1.85833	-0.00925	1.85867	-0.07695	1.8585	-0.04415	1.85867	-0.2629	1.85867	0.09095
1.86683	0.0443	1.867	-0.1019	1.86667	-0.01015	1.867	-0.07955	1.86683	-0.0458	1.867	-0.26425	1.867	0.0901
1.87517	0.04525	1.87533	-0.10205	1.875	-0.01025	1.87533	-0.0812	1.87517	-0.0457	1.87533	-0.2663	1.87533	0.09125
1.8835	0.04665	1.88367	-0.1034	1.88333	-0.01055	1.88367	-0.08065	1.8835	-0.04535	1.88367	-0.26615	1.88367	0.08965
1.89183	0.045	1.892	-0.1051	1.89167	-0.0103	1.892	-0.07835	1.89183	-0.04605	1.892	-0.26535	1.892	0.0896
1.90017	0.04455	1.90033	-0.10285	1.9	-0.00855	1.90033	-0.07945	1.90017	-0.04545	1.90033	-0.26795	1.90033	0.0919
1.9085	0.0464	1.90867	-0.1018	1.90833	-0.00715	1.90867	-0.0794	1.9085	-0.0447	1.90867	-0.2674	1.90867	0.09275
1.91683	0.0468	1.917	-0.10205	1.91667	-0.0087	1.917	-0.07855	1.91683	-0.0453	1.917	-0.2669	1.917	0.09165
1.92517	0.04655	1.92533	-0.10115	1.925	-0.008	1.92533	-0.0797	1.92517	-0.0439	1.92533	-0.2663	1.92533	0.09365
1.9335	0.04705	1.93367	-0.1004	1.93333	-0.0089	1.93367	-0.07945	1.9335	-0.0441	1.93367	-0.26615	1.93367	0.0952
1.94183	0.048	1.942	-0.1002	1.94167	-0.00825	1.942	-0.0777	1.94183	-0.0433	1.942	-0.2648	1.942	0.0937
1.95017	0.0472	1.95033	-0.1007	1.95	-0.00795	1.95033	-0.07725	1.95017	-0.0458	1.95033	-0.2636	1.95033	0.0925
1.9585	0.04465	1.95867	-0.10075	1.95833	-0.00755	1.95867	-0.0794	1.9585	-0.04535	1.95867	-0.26525	1.95867	0.0923
1.96683	0.0456	1.967	-0.1	1.96667	-0.0082	1.967	-0.07715	1.96683	-0.04505	1.967	-0.2635	1.967	0.09235
1.97517	0.0454	1.97533	-0.09975	1.975	-0.0077	1.97533	-0.0779	1.97517	-0.0447	1.97533	-0.2629	1.97533	0.09245
1.9835	0.045	1.98367	-0.1015	1.98333	-0.0084	1.98367	-0.07735	1.9835	-0.0465	1.98367	-0.2629	1.98367	0.09005
1.99183	0.0447	1.992	-0.1009	1.99167	-0.00775	1.992	-0.0785	1.99183	-0.0458	1.992	-0.26515	1.992	0.091
2.00017	0.0437	2.00033	-0.10235	2	-0.0095	2.00033	-0.0775	2.00017	-0.04665	2.00033	-0.2666	2.00033	0.09005
2.0085	0.04535	2.00867	-0.10185	2.00833	-0.0075	2.00867	-0.08125	2.0085	-0.046	2.00867	-0.267	2.00867	0.0909
2.01683	0.04465	2.017	-0.10185	2.01667	-0.01055	2.017	-0.0816	2.01683	-0.04615	2.017	-0.2663	2.017	0.08965
2.02517	0.04565	2.02533	-0.1017	2.025	-0.00975	2.02533	-0.08295	2.02517	-0.04565	2.02533	-0.26725	2.02533	0.0916
2.0335	0.04395	2.03367	-0.1013	2.03333	-0.00995	2.03367	-0.08565	2.0335	-0.0463	2.03367	-0.2694	2.03367	0.08835
2.04183	0.036	2.042	-0.10895	2.04167	-0.0185	2.042	-0.0832	2.04183	-0.054	2.042	-0.26755	2.042	0.08275
2.05017	0.0122	2.05033	-0.1341	2.05	-0.04195	2.05033	-0.084	2.05017	-0.07815	2.05033	-0.26855	2.05033	0.0585
2.0585	-0.0426	2.05867	-0.18725	2.05833	-0.09795	2.05867	-0.0854	2.0585	-0.13345	2.05867	-0.2691	2.05867	0.0034
2.06683	-0.13705	2.067	-0.2825	2.06667	-0.19825	2.067	-0.08695	2.06683	-0.23115	2.067	-0.27195	2.067	-0.09395
2.07517	-0.26955	2.07533	-0.4122	2.075	-0.33625	2.07533	-0.09365	2.07517	-0.36895	2.07533	-0.282	2.07533	-0.23355
2.0835	-0.4152	2.08367	-0.5534	2.08333	-0.48555	2.08367	-0.1118	2.0835	-0.5195	2.08367	-0.3071	2.08367	-0.38345
2.09183	-0.52825	2.092	-0.66785	2.09167	-0.5898	2.092	-0.15205	2.09183	-0.62725	2.092	-0.35835	2.092	-0.49875
2.10017	-0.5552	2.10033	-0.70395	2.1	-0.5871	2.10033	-0.21065	2.10017	-0.6266	2.10033	-0.4302	2.10033	-0.51555
2.1085	-0.4558	2.10867	-0.6206	2.10833	-0.44795	2.10867	-0.27665	2.1085	-0.4755	2.10867	-0.5093	2.10867	-0.3981
2.11683	-0.22765	2.117	-0.4108	2.11667	-0.195	2.117	-0.32725	2.11683	-0.18655	2.117	-0.5737	2.117	-0.1525
2.12517	0.07975	2.12533	-0.11735	2.125	0.10095	2.12533	-0.3457	2.12517	0.18075	2.12533	-0.60325	2.12533	0.15745
2.1335	0.37685	2.13367	0.1638	2.13333	0.35325	2.13367	-0.3242	2.1335	0.52735	2.13367	-0.59425	2.13367	0.44645
2.14183	0.5751	2.142	0.343	2.14167	0.5051	2.142	-0.2722	2.14183	0.7806	2.142	-0.5404	2.142	0.64015
2.15017	0.62775	2.15033	0.38645	2.15	0.5523	2.15033	-0.1992	2.15017	0.91455	2.15033	-0.43705	2.15033	0.7087
2.1585	0.5262	2.15867	0.3205	2.15833	0.52155	2.15867	-0.10745	2.1585	0.9504	2.15867	-0.2736	2.15867	0.6627
2.16683	0.3033	2.167	0.18775	2.16667	0.4491	2.167	0.0172	2.16683	0.9893	2.167	-0.0312	2.167	0.53915
2.17517	-0.0062	2.17533	0.01385	2.175	0.3982	2.17533	0.1906	2.17517	1.5298	2.17533	0.30945	2.17533	0.3686
2.1835	-0.3737	2.18367	-0.2033	2.18333	0.56085	2.18367	0.41545	2.1835	4.50035	2.18367	0.843	2.18367	0.22115
2.19183	-0.74135	2.192	-0.43435	2.19167	1.3947	2.192	0.68985	2.19183	14.5058	2.192	1.866	2.192	0.27195
2.20017	-1.00555	2.20033	-0.57395	2.2	3.5537	2.20033	1.0407	2.20017	37.6055	2.20033	3.95605	2.20033	0.80565
2.2085	-1.04375	2.20867	-0.4136	2.20833	7.57725	2.20867	1.5604	2.2085	75.6291	2.20867	7.82575	2.20867	2.10185
2.21683	-0.75785	2.217	0.2946	2.21667	13.4733	2.217	2.3603	2.21683	121.497	2.217	13.8712	2.217	4.2777
2.22517	-0.1368	2.22533	1.6775	2.225	20.5639	2.22533	3.49765	2.22517	147.709	2.22533	21.7791	2.22533	7.1812
2.2335	0.7427	2.23367	3.58775	2.23333	27.7616	2.23367	4.914	2.2335	198.768	2.23367	30.5784	2.23367	10.4281
2.24183	1.73135	2.242	5.5665	2.24167	33.9657	2.242	6.4185	2.24183	221.041	2.242	38.9705	2.242	13.5373
2.25017	2.67135	2.25033	7.03695	2.25	38.4365	2.25033	7.783	2.25017	233.877	2.25033	45.8178	2.25033	16.098
2.2585	3.43915	2.25867	7.6695	2.25833	40.8814	2.25867	8.80345	2.2585	239.491	2.25867	50.4725	2.25867	17.859
2.26683	3.964	2.267	7.54815	2.26667	41.3934	2.267	9.3747	2.26683	239.652	2.267	52.7927	2.267	18.7371
2.27517	4.23575	2.27533	7.0007	2.275	40.2934	2.27533	9.49115	2.27517	235.619	2.27533	52.9812	2.27533	18.8011
2.2835	4.2799	2.28367	6.31795	2.28333	38.0098	2.28367	9.22945	2.2835	228.297	2.28367	51.4526	2.28367	18.2042
2.29183	4.14485	2.292	5.64115	2.29167	34.9549	2.292	8.6893	2.29183	218.385	2.292	48.6589	2.292	17.1299
2.30017	3.88655	2.30033	4.9929	2.3	31.4972	2.30033	7.97705	2.30017	206.46	2.30033	45.0371	2.30033	15.7554
2.3085	3.5566	2.30867	4.36825	2.30833	27.9123	2.30867	7.1778	2.3085	193.04	2.30867	40.9575	2.30867	14.2282
2.31683	3.19345	2.317	3.7748	2.31667	24.4077	2.317	6.36035	2.31683	178.622	2.317	36.7034	2.317	12.6614
2.32517	2.8268	2.32533	3.22745	2.325	21.1176	2.32533	5.56475	2.32517	163.665	2.32533	32.4931	2.32533	11.1397
2.3335	2.475	2.33367	2.7383	2.33333	18.1254	2.33367	4.82905	2.3335	148.643	2.33367	28.4689	2.33367	9.71515
2.34183	2.15185	2.342	2.31515	2.34167	15.4663	2.342	4.1687	2.34183	133.946	2.342	24.7251	2.342	8.4218
2.35017	1.866	2.35033	1.96245	2.35	13.1623	2.35033	3.5891	2.35017	119.925	2.35033	21.3291	2.35033	7.2778
2.3585	1.61935	2.35867	1.6693	2.35833	11.1951	2.35867	3.08805	2.3585	106.826	2.35867	18.3027	2.35867	6.28075
2.36683	1.40575	2.367	1.4255	2.36667	9.5405	2.367	2.6629	2.36683	94.8332	2.367	15.6463	2.367	5.4225
2.37517	1.2282	2.37533	1.2276	2.375	8.16105	2.37533	2.30415	2.37517	84.0086	2.37533	13.356	2.37533	4.6945
2.3835	1.07695	2.38367	1.0631	2.38333	7.01445	2.38367	2.00435	2.3835	74.347	2.38367	11.4169	2.38367	4.0776
2.39183	0.9527	2.392	0.9282	2.39167	6.06245	2.392	1.7542	2.39183	65.8084	2.392	9.784	2.392	3.55995
2.40017	0.85085	2.40033	0.8186	2.4	5.27125	2.40033	1.55255	2.40017	58.3272	2.40033	8.4223	2.40033	3.131
2.4085	0.7644	2.40867	0.72365	2.40833	4.60575	2.40867	1.38225	2.4085	51.7863	2.40867	7.28955	2.40867	2.77075
2.41683	0.69	2.417	0.64105	2.41667	4.0453	2.417	1.2494	2.41683	46.0643	2.417	6.35345	2.417	2.46935
2.42517	0.62655	2.42533	0.5733	2.425	3.57435	2.42533	1.14095	2.42517	41.0613	2.42533	5.5761	2.42533	2.21915
2.4335	0.5749	2.43367	0.51255	2.43333	3.1751	2.43367	1.04845	2.4335	36.6894	2.43367	4.9295	2.43367	2.0095
2.44183	0.531	2.442	0.46315	2.44167	2.8371	2.442	0.9778	2.44183	32.8796	2.442	4.39945	2.442	1.8328
2.45017	0.4938	2.45033	0.4196	2.45	2.54975	2.45033	0.9246	2.45017	29.1178	2.45033	3.96115	2.45033	1.6848
2.4585	0.46115	2.45867	0.38215	2.45833	2.3055	2.45867	0.87825	2.4585	26.1064	2.45867	3.59845	2.45867	1.56275
2.46683	0.4327	2.467	0.34865	2.46667	2.10025	2.467	0.84675	2.46683	23.6851	2.467	3.29855	2.467	1.4593
2.47517	0.40925	2.47533	0.31955	2.475	1.92515	2.47533	0.8233	2.47517	21.6566	2.47533	3.0518	2.47533	1.37515
2.4835	0.3888	2.48367	0.2944	2.48333	1.77835	2.48367	0.80675	2.4835	19.9623	2.48367	2.8459	2.48367	1.30515
2.49183	0.3724	2.492	0.2715	2.49167	1.6537	2.492	0.79415	2.49183	18.5495	2.492	2.67405	2.492	1.24655
2.50017	0.35805	2.50033	0.25215	2.5	1.5484	2.50033	0.78755	2.50017	17.3713	2.50033	2.53225	2.50033	1.19335
2.5085	0.3444	2.50867	0.2348	2.50833	1.45885	2.50867	0.7837	2.5085	16.3776	2.50867	2.4123	2.50867	1.1458
2.51683	0.3317	2.517	0.22	2.51667	1.38165	2.517	0.77835	2.51683	15.5344	2.517	2.31065	2.517	1.10415
2.52517	0.32365	2.52533	0.2063	2.525	1.3133	2.52533	0.77945	2.52517	14.7985	2.52533	2.2248	2.52533	1.06515
2.5335	0.3167	2.53367	0.1948	2.53333	1.2527	2.53367	0.78315	2.5335	14.1406	2.53367	2.1513	2.53367	1.0275
2.54183	0.31655	2.542	0.1865	2.54167	1.2018	2.542	0.78995	2.54183	13.541	2.542	2.08985	2.542	0.99495
2.55017	0.31925	2.55033	0.17965	2.55	1.1527	2.55033	0.80165	2.55017	12.98	2.55033	2.0359	2.55033	0.9624
2.5585	0.32245	2.55867	0.17715	2.55833	1.1068	2.55867	0.81615	2.5585	12.4436	2.55867	1.9892	2.55867	0.93415
2.56683	0.33145	2.567	0.17385	2.56667	1.06155	2.567	0.8316	2.56683	11.9223	2.567	1.94965	2.567	0.9054
2.57517	0.3363	2.57533	0.17165	2.575	1.01715	2.57533	0.84425	2.57517	11.4136	2.57533	1.90985	2.57533	0.87855
2.5835	0.34015	2.58367	0.1694	2.58333	0.9752	2.58367	0.85375	2.5835	10.9131	2.58367	1.8731	2.58367	0.8532
2.59183	0.3421	2.592	0.1628	2.59167	0.93365	2.592	0.8559	2.59183	10.425	2.592	1.83585	2.592	0.82795
2.60017	0.33665	2.60033	0.15255	2.6	0.89135	2.60033	0.85185	2.60017	9.9468	2.60033	1.79615	2.60033	0.80135
2.6085	0.3277	2.60867	0.1408	2.60833	0.84825	2.60867	0.84545	2.6085	9.4779	2.60867	1.75765	2.60867	0.7752
2.61683	0.31685	2.617	0.12865	2.61667	0.8092	2.617	0.83215	2.61683	9.02235	2.617	1.71755	2.617	0.74975
2.62517	0.30655	2.62533	0.12055	2.625	0.77235	2.62533	0.81825	2.62517	8.58285	2.62533	1.6777	2.62533	0.72565
2.6335	0.29305	2.63367	0.1131	2.63333	0.7374	2.63367	0.8034	2.6335	8.15395	2.63367	1.6396	2.63367	0.7011
2.64183	0.27925	2.642	0.10435	2.64167	0.7035	2.642	0.786	2.64183	7.74155	2.642	1.5986	2.642	0.6794
2.65017	0.26685	2.65033	0.1013	2.65	0.6748	2.65033	0.7678	2.65017	7.3527	2.65033	1.5569	2.65033	0.6618
2.6585	0.25475	2.65867	0.09395	2.65833	0.6445	2.65867	0.7516	2.6585	6.99215	2.65867	1.51615	2.65867	0.64605
2.66683	0.24355	2.667	0.08785	2.66667	0.61905	2.667	0.73155	2.66683	6.67275	2.667	1.47535	2.667	0.64045
2.67517	0.2326	2.67533	0.081	2.675	0.59195	2.67533	0.7109	2.67517	6.40935	2.67533	1.43195	2.67533	0.64905
2.6835	0.2246	2.68367	0.0804	2.68333	0.57325	2.68367	0.6928	2.6835	6.22235	2.68367	1.39045	2.68367	0.67445
2.69183	0.21705	2.692	0.0784	2.69167	0.55485	2.692	0.6786	2.69183	6.12015	2.692	1.34735	2.692	0.7148
2.70017	0.21195	2.70033	0.084	2.7	0.5406	2.70033	0.6708	2.70017	6.12315	2.70033	1.3102	2.70033	0.7667
2.7085	0.2082	2.70867	0.09515	2.70833	0.52995	2.70867	0.6714	2.7085	6.22875	2.70867	1.27195	2.70867	0.82675
2.71683	0.2055	2.717	0.1087	2.71667	0.52025	2.717	0.68515	2.71683	6.4097	2.717	1.24055	2.717	0.8839
2.72517	0.2054	2.72533	0.1295	2.725	0.51585	2.72533	0.7015	2.72517	6.62975	2.72533	1.2108	2.72533	0.93255
2.7335	0.207	2.73367	0.15045	2.73333	0.51205	2.73367	0.7214	2.7335	6.8364	2.73367	1.1874	2.73367	0.9694
2.74183	0.2082	2.742	0.172	2.74167	0.5086	2.742	0.7392	2.74183	6.98445	2.742	1.16685	2.742	0.9939
2.75017	0.2076	2.75033	0.18125	2.75	0.5049	2.75033	0.75145	2.75017	7.0418	2.75033	1.15495	2.75033	1.0024
2.7585	0.2077	2.75867	0.1833	2.75833	0.50235	2.75867	0.7554	2.7585	7.00235	2.75867	1.1555	2.75867	0.9999
2.76683	0.2059	2.767	0.1803	2.76667	0.503	2.767	0.7516	2.76683	6.8745	2.767	1.1634	2.767	0.9919
2.77517	0.20805	2.77533	0.174	2.775	0.50565	2.77533	0.74705	2.77517	6.6795	2.77533	1.1872	2.77533	0.9813
2.7835	0.21015	2.78367	0.1698	2.78333	0.51325	2.78367	0.74075	2.7835	6.43855	2.78367	1.22395	2.78367	0.9685
2.79183	0.2095	2.792	0.16355	2.79167	0.51995	2.792	0.7383	2.79183	6.16955	2.792	1.27835	2.792	0.9528
2.80017	0.20925	2.80033	0.1622	2.8	0.531	2.80033	0.73425	2.80017	5.8952	2.80033	1.33595	2.80033	0.94145
2.8085	0.21205	2.80867	0.1617	2.80833	0.5452	2.80867	0.72985	2.8085	5.62385	2.80867	1.4001	2.80867	0.93095
2.81683	0.21135	2.817	0.1618	2.81667	0.5561	2.817	0.7251	2.81683	5.3627	2.817	1.46405	2.817	0.91955
2.82517	0.21465	2.82533	0.1628	2.825	0.5687	2.82533	0.72485	2.82517	5.1186	2.82533	1.5264	2.82533	0.9089
2.8335	0.21565	2.83367	0.1631	2.83333	0.58005	2.83367	0.7255	2.8335	4.891	2.83367	1.583	2.83367	0.90025
2.84183	0.21835	2.842	0.16505	2.84167	0.5896	2.842	0.72555	2.84183	4.6798	2.842	1.62955	2.842	0.8922
2.85017	0.2197	2.85033	0.16385	2.85	0.596	2.85033	0.72785	2.85017	4.48785	2.85033	1.66655	2.85033	0.8801
2.8585	0.2208	2.85867	0.1643	2.85833	0.6014	2.85867	0.72855	2.8585	4.31235	2.85867	1.6959	2.85867	0.8701
2.86683	0.2207	2.867	0.164	2.86667	0.6049	2.867	0.73135	2.86683	4.1533	2.867	1.71485	2.867	0.86045
2.87517	0.2205	2.87533	0.16205	2.875	0.6038	2.87533	0.7318	2.87517	4.0068	2.87533	1.7265	2.87533	0.84625
2.8835	0.2189	2.88367	0.1608	2.88333	0.6045	2.88367	0.7276	2.8835	3.87255	2.88367	1.72985	2.88367	0.8364
2.89183	0.2175	2.892	0.161	2.89167	0.6048	2.892	0.72055	2.89183	3.75275	2.892	1.7287	2.892	0.8249
2.90017	0.2188	2.90033	0.15945	2.9	0.60495	2.90033	0.7143	2.90017	3.64115	2.90033	1.72425	2.90033	0.81645
2.9085	0.2167	2.90867	0.1605	2.90833	0.60645	2.90867	0.7103	2.9085	3.53665	2.90867	1.7199	2.90867	0.80635
2.91683	0.21685	2.917	0.16375	2.91667	0.61115	2.917	0.7038	2.91683	3.44085	2.917	1.71095	2.917	0.7997
2.92517	0.21785	2.92533	0.16555	2.925	0.6205	2.92533	0.69735	2.92517	3.3537	2.92533	1.70275	2.92533	0.79155
2.9335	0.22095	2.93367	0.17325	2.93333	0.6384	2.93367	0.6939	2.9335	3.27915	2.93367	1.6946	2.93367	0.79
2.94183	0.22125	2.942	0.1788	2.94167	0.66695	2.942	0.69135	2.94183	3.2171	2.942	1.6922	2.942	0.786
2.95017	0.2249	2.95033	0.18705	2.95	0.7076	2.95033	0.68855	2.95017	3.17525	2.95033	1.6959	2.95033	0.78745
2.9585	0.22665	2.95867	0.1939	2.95833	0.7589	2.95867	0.6857	2.9585	3.15525	2.95867	1.70355	2.95867	0.79325
2.96683	0.22835	2.967	0.19965	2.96667	0.8188	2.967	0.68475	2.96683	3.1539	2.967	1.7228	2.967	0.80055
2.97517	0.22825	2.97533	0.20065	2.975	0.8738	2.97533	0.6875	2.97517	3.16585	2.97533	1.75235	2.97533	0.81455
2.9835	0.22435	2.98367	0.2009	2.98333	0.92165	2.98367	0.6913	2.9835	3.18285	2.98367	1.78825	2.98367	0.83135
2.99183	0.2223	2.992	0.19935	2.99167	0.955	2.992	0.69255	2.99183	3.1977	2.992	1.82465	2.992	0.85305
3.00017	0.2184	3.00033	0.19745	3	0.96935	3.00033	0.696	3.00017	3.2048	3.00033	1.8656	3.00033	0.879
3.0085	0.2158	3.00867	0.19585	3.00833	0.9659	3.00867	0.69935	3.0085	3.2022	3.00867	1.9022	3.00867	0.90625
3.01683	0.21065	3.017	0.1936	3.01667	0.9494	3.017	0.7019	3.01683	3.18495	3.017	1.9356	3.017	0.93355
3.02517	0.20535	3.02533	0.19175	3.025	0.9243	3.02533	0.70235	3.02517	3.15775	3.02533	1.95825	3.02533	0.9615
3.0335	0.20045	3.03367	0.19115	3.03333	0.8914	3.03367	0.70265	3.0335	3.119	3.03367	1.9762	3.03367	0.9875
3.04183	0.19855	3.042	0.1905	3.04167	0.8577	3.042	0.6985	3.04183	3.07225	3.042	1.9781	3.042	1.0086
3.05017	0.19315	3.05033	0.1881	3.05	0.82	3.05033	0.6954	3.05017	3.01735	3.05033	1.96995	3.05033	1.02265
3.0585	0.19095	3.05867	0.18825	3.05833	0.7875	3.05867	0.68805	3.0585	2.9631	3.05867	1.95125	3.05867	1.03645
3.06683	0.18765	3.067	0.18765	3.06667	0.7555	3.067	0.6806	3.06683	2.9043	3.067	1.92795	3.067	1.0431
3.07517	0.1827	3.07533	0.18845	3.075	0.7263	3.07533	0.6706	3.07517	2.84815	3.07533	1.8993	3.07533	1.0474
3.0835	0.18215	3.08367	0.1889	3.08333	0.70155	3.08367	0.6641	3.0835	2.79795	3.08367	1.8726	3.08367	1.0516
3.09183	0.1807	3.092	0.19235	3.09167	0.6786	3.092	0.65645	3.09183	2.75255	3.092	1.8477	3.092	1.05275
3.10017	0.179	3.10033	0.19465	3.1	0.65825	3.10033	0.6514	3.10017	2.71	3.10033	1.8285	3.10033	1.05445
3.1085	0.17695	3.10867	0.19955	3.10833	0.6422	3.10867	0.64885	3.1085	2.67445	3.10867	1.8164	3.10867	1.05455
3.11683	0.17275	3.117	0.206	3.11667	0.62625	3.117	0.6488	3.11683	2.6409	3.117	1.80635	3.117	1.0551
3.12517	0.1712	3.12533	0.21065	3.125	0.61235	3.12533	0.64715	3.12517	2.6061	3.12533	1.7959	3.12533	1.05325
3.1335	0.1643	3.13367	0.2108	3.13333	0.5958	3.13367	0.64495	3.1335	2.56595	3.13367	1.78515	3.13367	1.0469
3.14183	0.163	3.142	0.21785	3.14167	0.5822	3.142	0.64205	3.14183	2.5235	3.142	1.76705	3.142	1.04115
3.15017	0.16205	3.15033	0.2211	3.15	0.5675	3.15033	0.6402	3.15017	2.476	3.15033	1.7456	3.15033	1.03285
3.1585	0.15785	3.15867	0.22025	3.15833	0.55275	3.15867	0.62975	3.1585	2.4234	3.15867	1.7116	3.15867	1.0204
3.16683	0.1559	3.167	0.2185	3.16667	0.53595	3.167	0.62365	3.16683	2.3682	3.167	1.6805	3.167	1.005
3.17517	0.1527	3.17533	0.21325	3.175	0.52335	3.17533	0.61345	3.17517	2.3126	3.17533	1.6404	3.17533	0.98895
3.1835	0.14995	3.18367	0.2061	3.18333	0.5086	3.18367	0.60265	3.1835	2.25625	3.18367	1.5998	3.18367	0.97445
3.19183	0.1467	3.192	0.1986	3.19167	0.4962	3.192	0.59085	3.19183	2.2053	3.192	1.56135	3.192	0.95815
3.20017	0.1461	3.20033	0.1894	3.2	0.4835	3.20033	0.58015	3.20017	2.15585	3.20033	1.5228	3.20033	0.94155
3.2085	0.1437	3.20867	0.1807	3.20833	0.4748	3.20867	0.5698	3.2085	2.10925	3.20867	1.48555	3.20867	0.9294
3.21683	0.1436	3.217	0.17495	3.21667	0.4678	3.217	0.5583	3.21683	2.07135	3.217	1.45075	3.217	0.9208
3.22517	0.14245	3.22533	0.16685	3.225	0.45945	3.22533	0.55145	3.22517	2.03475	3.22533	1.422	3.22533	0.91605
3.2335	0.14155	3.23367	0.1608	3.23333	0.45205	3.23367	0.54255	3.2335	2.00865	3.23367	1.3947	3.23367	0.928
3.24183	0.1408	3.242	0.1553	3.24167	0.44845	3.242	0.5371	3.24183	1.9971	3.242	1.37085	3.242	0.97285
3.25017	0.14165	3.25033	0.15235	3.25	0.44595	3.25033	0.53165	3.25017	2.00645	3.25033	1.34895	3.25033	1.06455
3.2585	0.14185	3.25867	0.14905	3.25833	0.4431	3.25867	0.52775	3.2585	2.036	3.25867	1.33195	3.25867	1.21145
3.26683	0.14155	3.267	0.1469	3.26667	0.44295	3.267	0.52015	3.26683	2.08735	3.267	1.31525	3.267	1.4169
3.27517	0.14285	3.27533	0.14525	3.275	0.4416	3.27533	0.51785	3.27517	2.1537	3.27533	1.3038	3.27533	1.6546
3.2835	0.14165	3.28367	0.14435	3.28333	0.4403	3.28367	0.51525	3.2835	2.2238	3.28367	1.2923	3.28367	1.8973
3.29183	0.14335	3.292	0.14305	3.29167	0.44	3.292	0.5155	3.29183	2.2841	3.292	1.28815	3.292	2.10885
3.30017	0.14385	3.30033	0.1409	3.3	0.4399	3.30033	0.51605	3.30017	2.3266	3.30033	1.28905	3.30033	2.2613
3.3085	0.1438	3.30867	0.139	3.30833	0.43765	3.30867	0.5266	3.3085	2.34715	3.30867	1.3033	3.30867	2.3474
3.31683	0.1457	3.317	0.13815	3.31667	0.4368	3.317	0.5443	3.31683	2.3455	3.317	1.33435	3.317	2.3701
3.32517	0.14555	3.32533	0.13635	3.325	0.43435	3.32533	0.57605	3.32517	2.32285	3.32533	1.3854	3.32533	2.3354
3.3335	0.1455	3.33367	0.13715	3.33333	0.43155	3.33367	0.6305	3.3335	2.28735	3.33367	1.4633	3.33367	2.26225
3.34183	0.14775	3.342	0.1366	3.34167	0.43105	3.342	0.69885	3.34183	2.24365	3.342	1.5622	3.342	2.16585
3.35017	0.14925	3.35033	0.1388	3.35	0.4297	3.35033	0.7922	3.35017	2.19685	3.35033	1.69195	3.35033	2.0533
3.3585	0.1537	3.35867	0.1463	3.35833	0.4302	3.35867	0.8992	3.3585	2.15315	3.35867	1.83365	3.35867	1.9426
3.36683	0.1562	3.367	0.14985	3.36667	0.43145	3.367	1.01415	3.36683	2.11235	3.367	1.98435	3.367	1.8327
3.37517	0.16	3.37533	0.1596	3.375	0.4329	3.37533	1.14845	3.37517	2.07625	3.37533	2.15	3.37533	1.73085
3.3835	0.1659	3.38367	0.1676	3.38333	0.43635	3.38367	1.3174	3.3835	2.04235	3.38367	2.34865	3.38367	1.6347
3.39183	0.16965	3.392	0.17655	3.39167	0.4379	3.392	1.3399	3.39183	2.01355	3.392	2.3949	3.392	1.54965
3.40017	0.1732	3.40033	0.18255	3.4	0.44015	3.40033	1.41185	3.40017	1.98585	3.40033	2.488	3.40033	1.4733
3.4085	0.17895	3.40867	0.19135	3.40833	0.4397	3.40867	1.52245	3.4085	1.9611	3.40867	2.6146	3.40867	1.4083
3.41683	0.18465	3.417	0.19605	3.41667	0.43965	3.417	1.58365	3.41683	1.93675	3.417	2.68775	3.417	1.3466
3.42517	0.18725	3.42533	0.20095	3.425	0.44	3.42533	1.629	3.42517	1.9136	3.42533	2.7405	3.42533	1.2961
3.4335	0.18855	3.43367	0.20255	3.43333	0.43825	3.43367	1.671	3.4335	1.88995	3.43367	2.7889	3.43367	1.24715
3.44183	0.19125	3.442	0.2041	3.44167	0.4351	3.442	1.70285	3.44183	1.86725	3.442	2.82315	3.442	1.2055
3.45017	0.1915	3.45033	0.20525	3.45	0.432	3.45033	1.7267	3.45017	1.84565	3.45033	2.85175	3.45033	1.16705
3.4585	0.1938	3.45867	0.20735	3.45833	0.4309	3.45867	1.74945	3.4585	1.8283	3.45867	2.8732	3.45867	1.1364
3.46683	0.1917	3.467	0.2064	3.46667	0.42365	3.467	1.76725	3.46683	1.80825	3.467	2.88935	3.467	1.10695
3.47517	0.19165	3.47533	0.2058	3.475	0.42165	3.47533	1.78165	3.47517	1.7889	3.47533	2.9038	3.47533	1.0816
3.4835	0.1912	3.48367	0.20435	3.48333	0.4202	3.48367	1.7941	3.4835	1.77275	3.48367	2.9146	3.48367	1.0576
3.49183	0.1905	3.492	0.2067	3.49167	0.41765	3.492	1.80675	3.49183	1.75895	3.492	2.923	3.492	1.03885
3.50017	0.1923	3.50033	0.20575	3.5	0.415	3.50033	1.815	3.50017	1.74505	3.50033	2.92765	3.50033	1.0211
3.5085	0.1907	3.50867	0.2054	3.50833	0.4123	3.50867	1.81995	3.5085	1.73145	3.50867	2.9323	3.50867	1.00645
3.51683	0.19245	3.517	0.2063	3.51667	0.4106	3.517	1.82815	3.51683	1.7204	3.517	2.93825	3.517	0.9955
3.52517	0.19315	3.52533	0.2072	3.525	0.40925	3.52533	1.83115	3.52517	1.70955	3.52533	2.9392	3.52533	0.9863
3.5335	0.1961	3.53367	0.2075	3.53333	0.40715	3.53367	1.83555	3.5335	1.7001	3.53367	2.93885	3.53367	0.97775
3.54183	0.19425	3.542	0.20585	3.54167	0.403	3.542	1.84295	3.54183	1.68955	3.542	2.94295	3.542	0.96745
3.55017	0.1963	3.55033	0.20505	3.55	0.39885	3.55033	1.84735	3.55017	1.67925	3.55033	2.94475	3.55033	0.95785
3.5585	0.19595	3.55867	0.2031	3.55833	0.39635	3.55867	1.8591	3.5585	1.6696	3.55867	2.95285	3.55867	0.9523
3.56683	0.1965	3.567	0.20425	3.56667	0.3955	3.567	1.8747	3.56683	1.66015	3.567	2.9636	3.567	0.9457
3.57517	0.19605	3.57533	0.2023	3.575	0.3949	3.57533	1.7236	3.57517	1.6516	3.57533	2.8106	3.57533	0.9398
3.5835	0.1932	3.58367	0.2008	3.58333	0.3905	3.58367	1.86485	3.5835	1.64195	3.58367	2.9474	3.58367	0.9348
3.59183	0.1913	3.592	0.1996	3.59167	0.38635	3.592	1.8853	3.59183	1.63535	3.592	2.9657	3.592	0.92965
3.60017	0.1939	3.60033	0.20085	3.6	0.38415	3.60033	1.88355	3.60017	1.62895	3.60033	2.95885	3.60033	0.9243
3.6085	0.1935	3.60867	0.19825	3.60833	0.38165	3.60867	1.88165	3.6085	1.62025	3.60867	2.9583	3.60867	0.9173
3.61683	0.19395	3.617	0.1992	3.61667	0.37895	3.617	1.8852	3.61683	1.6147	3.617	2.95935	3.617	0.9133
3.62517	0.19515	3.62533	0.19905	3.625	0.377	3.62533	1.8872	3.62517	1.60865	3.62533	2.9615	3.62533	0.90875
3.6335	0.19375	3.63367	0.1987	3.63333	0.377	3.63367	1.8877	3.6335	1.60015	3.63367	2.9624	3.63367	0.9038
3.64183	0.191	3.642	0.19695	3.64167	0.37395	3.642	1.89035	3.64183	1.59255	3.642	2.96515	3.642	0.8978
3.65017	0.1893	3.65033	0.1968	3.65	0.3728	3.65033	1.8941	3.65017	1.58755	3.65033	2.97195	3.65033	0.89435
3.6585	0.18835	3.65867	0.19595	3.65833	0.3705	3.65867	1.8976	3.6585	1.5803	3.65867	2.9771	3.65867	0.89115
3.66683	0.19025	3.667	0.19835	3.66667	0.37125	3.667	1.8965	3.66683	1.5755	3.667	2.98045	3.667	0.8909
3.67517	0.18865	3.67533	0.19705	3.675	0.3689	3.67533	1.8991	3.67517	1.56775	3.67533	2.9876	3.67533	0.8874
3.6835	0.18815	3.68367	0.19595	3.68333	0.36605	3.68367	1.9028	3.6835	1.5615	3.68367	2.99725	3.68367	0.8857
3.69183	0.1912	3.692	0.19735	3.69167	0.36705	3.692	1.9044	3.69183	1.557	3.692	3.0064	3.692	0.88715
3.70017	0.19055	3.70033	0.19565	3.7	0.3652	3.70033	1.9066	3.70017	1.5509	3.70033	3.01685	3.70033	0.8888
3.7085	0.1891	3.70867	0.19405	3.70833	0.3613	3.70867	1.9084	3.7085	1.54335	3.70867	3.022	3.70867	0.88835
3.71683	0.1902	3.717	0.194	3.71667	0.35985	3.717	1.9086	3.71683	1.53985	3.717	3.02525	3.717	0.89135
3.72517	0.19015	3.72533	0.19145	3.725	0.35735	3.72533	1.91065	3.72517	1.53515	3.72533	3.0299	3.72533	0.89515
3.7335	0.1892	3.73367	0.1905	3.73333	0.3569	3.73367	1.91455	3.7335	1.5295	3.73367	3.0318	3.73367	0.90025
3.74183	0.1892	3.742	0.1909	3.74167	0.35525	3.742	1.9142	3.74183	1.5233	3.742	3.02935	3.742	0.90465
3.75017	0.18815	3.75033	0.18895	3.75	0.3522	3.75033	1.91345	3.75017	1.51615	3.75033	3.02705	3.75033	0.9069
3.7585	0.18925	3.75867	0.18925	3.75833	0.35365	3.75867	1.9135	3.7585	1.51305	3.75867	3.0213	3.75867	0.91045
3.76683	0.18995	3.767	0.1885	3.76667	0.3518	3.767	1.91335	3.76683	1.50635	3.767	3.01755	3.767	0.91595
3.77517	0.1896	3.77533	0.1894	3.775	0.3501	3.77533	1.91235	3.77517	1.50215	3.77533	3.0114	3.77533	0.91945
3.7835	0.1882	3.78367	0.1891	3.78333	0.3506	3.78367	1.91115	3.7835	1.4975	3.78367	3.00455	3.78367	0.92355
3.79183	0.1906	3.792	0.1894	3.79167	0.34795	3.792	1.9105	3.79183	1.4919	3.792	2.99975	3.792	0.92545
3.80017	0.18825	3.80033	0.1891	3.8	0.34765	3.80033	1.9107	3.80017	1.4881	3.80033	2.9945	3.80033	0.928
3.8085	0.18835	3.80867	0.18875	3.80833	0.3457	3.80867	1.90965	3.8085	1.4834	3.80867	2.98765	3.80867	0.92785
3.81683	0.18965	3.817	0.1885	3.81667	0.34605	3.817	1.90875	3.81683	1.481	3.817	2.98125	3.817	0.92905
3.82517	0.18865	3.82533	0.18765	3.825	0.34615	3.82533	1.9063	3.82517	1.47605	3.82533	2.97615	3.82533	0.9301
3.8335	0.18745	3.83367	0.1876	3.83333	0.34495	3.83367	1.90405	3.8335	1.4716	3.83367	2.9679	3.83367	0.9284
3.84183	0.1899	3.842	0.18825	3.84167	0.34405	3.842	1.90225	3.84183	1.4719	3.842	2.9627	3.842	0.9284
3.85017	0.18845	3.85033	0.18815	3.85	0.34275	3.85033	1.90315	3.85017	1.4687	3.85033	2.95735	3.85033	0.92565
3.8585	0.1881	3.85867	0.18585	3.85833	0.34195	3.85867	1.9009	3.8585	1.46605	3.85867	2.9536	3.85867	0.92375
3.86683	0.18715	3.867	0.18805	3.86667	0.3404	3.867	1.89875	3.86683	1.4643	3.867	2.9475	3.867	0.9222
3.87517	0.1873	3.87533	0.1857	3.875	0.33915	3.87533	1.89615	3.87517	1.46125	3.87533	2.9435	3.87533	0.91925
3.8835	0.1868	3.88367	0.18555	3.88333	0.33855	3.88367	1.895	3.8835	1.45825	3.88367	2.94165	3.88367	0.91695
3.89183	0.1855	3.892	0.18445	3.89167	0.3376	3.892	1.8914	3.89183	1.4549	3.892	2.93615	3.892	0.9128
3.90017	0.1846	3.90033	0.18405	3.9	0.3344	3.90033	1.8901	3.90017	1.44935	3.90033	2.933	3.90033	0.9069
3.9085	0.18665	3.90867	0.18555	3.90833	0.33485	3.90867	1.88745	3.9085	1.4445	3.90867	2.92985	3.90867	0.90365
3.91683	0.1854	3.917	0.1837	3.91667	0.33245	3.917	1.88935	3.91683	1.4376	3.917	2.9279	3.917	0.89965
3.92517	0.18475	3.92533	0.18465	3.925	0.3318	3.92533	1.8894	3.92517	1.43305	3.92533	2.9274	3.92533	0.8951
3.9335	0.18345	3.93367	0.18325	3.93333	0.33015	3.93367	1.88535	3.9335	1.4278	3.93367	2.92185	3.93367	0.8903
3.94183	0.18545	3.942	0.18365	3.94167	0.33045	3.942	1.88215	3.94183	1.4245	3.942	2.91855	3.942	0.8862
3.95017	0.18505	3.95033	0.18195	3.95	0.32835	3.95033	1.8823	3.95017	1.41955	3.95033	2.91865	3.95033	0.8797
3.9585	0.18285	3.95867	0.18095	3.95833	0.3277	3.95867	1.88065	3.9585	1.4155	3.95867	2.9171	3.95867	0.87655
3.96683	0.18375	3.967	0.18185	3.96667	0.32755	3.967	1.88015	3.96683	1.41445	3.967	2.91425	3.967	0.87415
3.97517	0.18445	3.97533	0.1822	3.975	0.32745	3.97533	1.8781	3.97517	1.41115	3.97533	2.91325	3.97533	0.8723
3.9835	0.18395	3.98367	0.18145	3.98333	0.32515	3.98367	1.876	3.9835	1.41	3.98367	2.9115	3.98367	0.8698
3.99183	0.1848	3.992	0.18265	3.99167	0.3259	3.992	1.87605	3.99183	1.40875	3.992	2.9118	3.992	0.86995
4.00017	0.18535	4.00033	0.18145	4	0.3258	4.00033	1.8761	4.00017	1.40845	4.00033	2.91015	4.00033	0.87025
4.0085	0.1825	4.00867	0.1806	4.00833	0.3254	4.00867	1.8737	4.0085	1.40555	4.00867	2.90755	4.00867	0.86635
4.01683	0.183	4.017	0.18055	4.01667	0.32455	4.017	1.87105	4.01683	1.4022	4.017	2.9041	4.017	0.8672
4.02517	0.18105	4.02533	0.17945	4.025	0.32245	4.02533	1.872	4.02517	1.4021	4.02533	2.90335	4.02533	0.8671
4.0335	0.1796	4.03367	0.17795	4.03333	0.3207	4.03367	1.8703	4.0335	1.3984	4.03367	2.90185	4.03367	0.867
4.04183	0.17975	4.042	0.17765	4.04167	0.3194	4.042	1.86785	4.04183	1.39625	4.042	2.89865	4.042	0.86695
4.05017	0.1798	4.05033	0.17935	4.05	0.32	4.05033	1.8642	4.05017	1.3939	4.05033	2.8952	4.05033	0.8679
4.0585	0.17855	4.05867	0.1781	4.05833	0.31675	4.05867	1.8634	4.0585	1.39065	4.05867	2.8916	4.05867	0.8677
4.06683	0.17775	4.067	0.17425	4.06667	0.3152	4.067	1.8594	4.06683	1.3862	4.067	2.8901	4.067	0.86965
4.07517	0.1791	4.07533	0.1779	4.075	0.31695	4.07533	1.8581	4.07517	1.3849	4.07533	2.88945	4.07533	0.8729
4.0835	0.1761	4.08367	0.17435	4.08333	0.31145	4.08367	1.85505	4.0835	1.3771	4.08367	2.88815	4.08367	0.87305
4.09183	0.1777	4.092	0.17465	4.09167	0.3101	4.092	1.85165	4.09183	1.3753	4.092	2.8839	4.092	0.87505
4.10017	0.17825	4.10033	0.1744	4.1	0.3106	4.10033	1.85035	4.10017	1.37225	4.10033	2.8831	4.10033	0.87885
4.1085	0.17715	4.10867	0.1744	4.10833	0.30725	4.10867	1.84675	4.1085	1.36645	4.10867	2.8789	4.10867	0.88025
4.11683	0.17575	4.117	0.17365	4.11667	0.30605	4.117	1.8451	4.11683	1.3631	4.117	2.8769	4.117	0.88125
4.12517	0.17525	4.12533	0.17215	4.125	0.3022	4.12533	1.84285	4.12517	1.3589	4.12533	2.87735	4.12533	0.8822
4.1335	0.17605	4.13367	0.17025	4.13333	0.3011	4.13367	1.8424	4.1335	1.35435	4.13367	2.8766	4.13367	0.88025
4.14183	0.17405	4.142	0.1706	4.14167	0.29955	4.142	1.8406	4.14183	1.35235	4.142	2.87765	4.142	0.8821
4.15017	0.1748	4.15033	0.1706	4.15	0.30005	4.15033	1.838	4.15017	1.35005	4.15033	2.87875	4.15033	0.8819
4.1585	0.1744	4.15867	0.1701	4.15833	0.29915	4.15867	1.8377	4.1585	1.3497	4.15867	2.87975	4.15867	0.88245
4.16683	0.1751	4.167	0.17075	4.16667	0.301	4.167	1.8355	4.16683	1.349	4.167	2.88235	4.167	0.8801
4.17517	0.17635	4.17533	0.17165	4.175	0.3019	4.17533	1.83505	4.17517	1.3516	4.17533	2.8849	4.17533	0.8796
4.1835	0.17675	4.18367	0.17185	4.18333	0.30225	4.18367	1.83265	4.1835	1.35455	4.18367	2.889	4.18367	0.87645
4.19183	0.17545	4.192	0.17085	4.19167	0.3021	4.192	1.8315	4.19183	1.3629	4.192	2.8922	4.192	0.8742
4.20017	0.176	4.20033	0.16905	4.2	0.3036	4.20033	1.82935	4.20017	1.3719	4.20033	2.89775	4.20033	0.87175
4.2085	0.17425	4.20867	0.17145	4.20833	0.30635	4.20867	1.82815	4.2085	1.3818	4.20867	2.90015	4.20867	0.86855
4.21683	0.17435	4.217	0.1729	4.21667	0.3065	4.217	1.82715	4.21683	1.39585	4.217	2.9034	4.217	0.86815
4.22517	0.17445	4.22533	0.1731	4.225	0.30915	4.22533	1.8281	4.22517	1.41265	4.22533	2.9085	4.22533	0.8658
4.2335	0.1751	4.23367	0.1745	4.23333	0.31375	4.23367	1.8232	4.2335	1.4276	4.23367	2.90945	4.23367	0.8659
4.24183	0.17615	4.242	0.17705	4.24167	0.3159	4.242	1.8247	4.24183	1.44445	4.242	2.9104	4.242	0.8649
4.25017	0.1803	4.25033	0.18085	4.25	0.32185	4.25033	1.8248	4.25017	1.4628	4.25033	2.91315	4.25033	0.8666
4.2585	0.1817	4.25867	0.184	4.25833	0.32535	4.25867	1.8228	4.2585	1.4801	4.25867	2.9137	4.25867	0.86725
4.26683	0.18555	4.267	0.1871	4.26667	0.327	4.267	1.82355	4.26683	1.49545	4.267	2.9177	4.267	0.86865
4.27517	0.19	4.27533	0.1886	4.275	0.3302	4.27533	1.82195	4.27517	1.51	4.27533	2.91705	4.27533	0.86825
4.2835	0.1968	4.28367	0.19395	4.28333	0.334	4.28367	1.82255	4.2835	1.52415	4.28367	2.9196	4.28367	0.8708
4.29183	0.2015	4.292	0.1957	4.29167	0.33595	4.292	1.82435	4.29183	1.5341	4.292	2.9222	4.292	0.87185
4.30017	0.20485	4.30033	0.19515	4.3	0.33485	4.30033	1.82545	4.30017	1.5386	4.30033	2.92075	4.30033	0.87125
4.3085	0.21205	4.30867	0.1957	4.30833	0.33645	4.30867	1.8238	4.3085	1.5456	4.30867	2.9186	4.30867	0.87195
4.31683	0.21345	4.317	0.1955	4.31667	0.33275	4.317	1.822	4.31683	1.54465	4.317	2.9158	4.317	0.86985
4.32517	0.2154	4.32533	0.19315	4.325	0.33155	4.32533	1.8216	4.32517	1.542	4.32533	2.9119	4.32533	0.86425
4.3335	0.2173	4.33367	0.1934	4.33333	0.32935	4.33367	1.8203	4.3335	1.54055	4.33367	2.9072	4.33367	0.86435
4.34183	0.21745	4.342	0.1918	4.34167	0.32775	4.342	1.81605	4.34183	1.5349	4.342	2.9	4.342	0.86135
4.35017	0.21975	4.35033	0.19295	4.35	0.32705	4.35033	1.81535	4.35017	1.5302	4.35033	2.8953	4.35033	0.86055
4.3585	0.2204	4.35867	0.19165	4.35833	0.32405	4.35867	1.81115	4.3585	1.5238	4.35867	2.88775	4.35867	0.85785
4.36683	0.21675	4.367	0.1895	4.36667	0.31925	4.367	1.80725	4.36683	1.514	4.367	2.87885	4.367	0.8551
4.37517	0.2153	4.37533	0.1873	4.375	0.317	4.37533	1.80345	4.37517	1.506	4.37533	2.87265	4.37533	0.8523
4.3835	0.2145	4.38367	0.18565	4.38333	0.31425	4.38367	1.7991	4.3835	1.49665	4.38367	2.86475	4.38367	0.8524
4.39183	0.211	4.392	0.1833	4.39167	0.31135	4.392	1.79595	4.39183	1.4843	4.392	2.85975	4.392	0.85165
4.40017	0.2068	4.40033	0.18055	4.4	0.30705	4.40033	1.7915	4.40017	1.4756	4.40033	2.85195	4.40033	0.85445
4.4085	0.20465	4.40867	0.17945	4.40833	0.30595	4.40867	1.78945	4.4085	1.4646	4.40867	2.8459	4.40867	0.85445
4.41683	0.20055	4.417	0.17755	4.41667	0.30475	4.417	1.7857	4.41683	1.45555	4.417	2.84025	4.417	0.8567
4.42517	0.19865	4.42533	0.17785	4.425	0.3048	4.42533	1.78105	4.42517	1.44745	4.42533	2.832	4.42533	0.86015
4.4335	0.195	4.43367	0.1758	4.43333	0.30195	4.43367	1.7778	4.4335	1.4382	4.43367	2.82505	4.43367	0.8603
4.44183	0.1925	4.442	0.17595	4.44167	0.302	4.442	1.77295	4.44183	1.42805	4.442	2.81885	4.442	0.86035
4.45017	0.1907	4.45033	0.1756	4.45	0.3009	4.45033	1.7668	4.45017	1.42075	4.45033	2.8101	4.45033	0.86075
4.4585	0.18665	4.45867	0.1764	4.45833	0.2992	4.45867	1.76145	4.4585	1.4122	4.45867	2.8038	4.45867	0.85975
4.46683	0.18625	4.467	0.17765	4.46667	0.29885	4.467	1.75745	4.46683	1.40685	4.467	2.7985	4.467	0.8594
4.47517	0.18625	4.47533	0.1802	4.475	0.29975	4.47533	1.75285	4.47517	1.4021	4.47533	2.79135	4.47533	0.8605
4.4835	0.1849	4.48367	0.17945	4.48333	0.2983	4.48367	1.75065	4.4835	1.39475	4.48367	2.7879	4.48367	0.8588
4.49183	0.1821	4.492	0.17925	4.49167	0.29805	4.492	1.74695	4.49183	1.39035	4.492	2.7829	4.492	0.8583
4.50017	0.1821	4.50033	0.17915	4.5	0.2977	4.50033	1.7421	4.50017	1.38555	4.50033	2.7764	4.50033	0.85915
4.5085	0.18055	4.50867	0.17805	4.50833	0.2958	4.50867	1.74015	4.5085	1.37925	4.50867	2.77235	4.50867	0.85705
4.51683	0.18115	4.517	0.17895	4.51667	0.29405	4.517	1.7374	4.51683	1.376	4.517	2.77025	4.517	0.85625
4.52517	0.1762	4.52533	0.1782	4.525	0.2923	4.52533	1.73325	4.52517	1.37245	4.52533	2.76505	4.52533	0.857
4.5335	0.1774	4.53367	0.1773	4.53333	0.29295	4.53367	1.7297	4.5335	1.37015	4.53367	2.76195	4.53367	0.8564
4.54183	0.1776	4.542	0.17655	4.54167	0.2908	4.542	1.72285	4.54183	1.3656	4.542	2.7543	4.542	0.8559
4.55017	0.1778	4.55033	0.17645	4.55	0.291	4.55033	1.72535	4.55017	1.3631	4.55033	2.75515	4.55033	0.8548
4.5585	0.17665	4.55867	0.1764	4.55833	0.28985	4.55867	1.7244	4.5585	1.36245	4.55867	2.75315	4.55867	0.8524
4.56683	0.1757	4.567	0.17525	4.56667	0.2902	4.567	1.72675	4.56683	1.35955	4.567	2.7541	4.567	0.8489
4.57517	0.17385	4.57533	0.174	4.575	0.28945	4.57533	1.72415	4.57517	1.35535	4.57533	2.7519	4.57533	0.8454
4.5835	0.1729	4.58367	0.1733	4.58333	0.28825	4.58367	1.7249	4.5835	1.3523	4.58367	2.75075	4.58367	0.8402
4.59183	0.17295	4.592	0.1734	4.59167	0.28625	4.592	1.72425	4.59183	1.3501	4.592	2.74865	4.592	0.8386
4.60017	0.17215	4.60033	0.17205	4.6	0.2848	4.60033	1.72745	4.60017	1.34705	4.60033	2.7444	4.60033	0.8356
4.6085	0.17215	4.60867	0.172	4.60833	0.28465	4.60867	1.7374	4.6085	1.34495	4.60867	2.7461	4.60867	0.8335
4.61683	0.17125	4.617	0.1722	4.61667	0.2842	4.617	1.76325	4.61683	1.34345	4.617	2.7472	4.617	0.8338
4.62517	0.1703	4.62533	0.17095	4.625	0.28295	4.62533	1.8023	4.62517	1.34075	4.62533	2.7525	4.62533	0.8334
4.6335	0.1709	4.63367	0.16955	4.63333	0.2819	4.63367	1.87015	4.6335	1.3402	4.63367	2.7645	4.63367	0.83565
4.64183	0.1696	4.642	0.1687	4.64167	0.282	4.642	1.97095	4.64183	1.3362	4.642	2.77775	4.642	0.8363
4.65017	0.168	4.65033	0.16655	4.65	0.2795	4.65033	2.11075	4.65017	1.3336	4.65033	2.7958	4.65033	0.83865
4.6585	0.1682	4.65867	0.16695	4.65833	0.2795	4.65867	2.29225	4.6585	1.33025	4.65867	2.82425	4.65867	0.84145
4.66683	0.1671	4.667	0.16625	4.66667	0.27755	4.667	2.49975	4.66683	1.32745	4.667	2.8521	4.667	0.84395
4.67517	0.1683	4.67533	0.16515	4.675	0.27675	4.67533	2.7103	4.67517	1.32495	4.67533	2.87905	4.67533	0.84665
4.6835	0.1687	4.68367	0.1642	4.68333	0.2755	4.68367	2.8899	4.6835	1.3227	4.68367	2.8954	4.68367	0.84965
4.69183	0.16665	4.692	0.1617	4.69167	0.27305	4.692	3.03125	4.69183	1.3196	4.692	2.91075	4.692	0.85315
4.70017	0.1675	4.70033	0.162	4.7	0.27575	4.70033	3.115	4.70017	1.32045	4.70033	2.91335	4.70033	0.85795
4.7085	0.16575	4.70867	0.16185	4.70833	0.2737	4.70867	3.13965	4.7085	1.3157	4.70867	2.9099	4.70867	0.86475
4.71683	0.1655	4.717	0.16035	4.71667	0.27355	4.717	3.1094	4.71683	1.31735	4.717	2.8988	4.717	0.87555
4.72517	0.1643	4.72533	0.1591	4.725	0.27165	4.72533	3.0362	4.72517	1.31685	4.72533	2.8843	4.72533	0.8873
4.7335	0.1634	4.73367	0.16	4.73333	0.2736	4.73367	2.93215	4.7335	1.31975	4.73367	2.8628	4.73367	0.9042
4.74183	0.16345	4.742	0.15905	4.74167	0.2734	4.742	2.8109	4.74183	1.3219	4.742	2.84325	4.742	0.92175
4.75017	0.16115	4.75033	0.15775	4.75	0.27145	4.75033	2.6835	4.75017	1.32185	4.75033	2.82045	4.75033	0.93765
4.7585	0.16135	4.75867	0.15955	4.75833	0.2734	4.75867	2.5545	4.7585	1.32305	4.75867	2.7982	4.75867	0.95055
4.76683	0.1602	4.767	0.15815	4.76667	0.2735	4.767	2.4346	4.76683	1.32415	4.767	2.78085	4.767	0.95935
4.77517	0.15865	4.77533	0.15705	4.775	0.2722	4.77533	2.32515	4.77517	1.3215	4.77533	2.7612	4.77533	0.96045
4.7835	0.15785	4.78367	0.1569	4.78333	0.2714	4.78367	2.22475	4.7835	1.3178	4.78367	2.7432	4.78367	0.9578
4.79183	0.1562	4.792	0.1542	4.79167	0.2708	4.792	2.1364	4.79183	1.3123	4.792	2.72965	4.792	0.948
4.80017	0.1574	4.80033	0.15615	4.8	0.27275	4.80033	2.059	4.80017	1.3072	4.80033	2.7134	4.80033	0.93635
4.8085	0.1568	4.80867	0.1557	4.80833	0.2719	4.80867	1.9922	4.8085	1.3023	4.80867	2.69955	4.80867	0.92435
4.81683	0.1563	4.817	0.1548	4.81667	0.27225	4.817	1.93295	4.81683	1.29675	4.817	2.688	4.817	0.90855
4.82517	0.15725	4.82533	0.15545	4.825	0.2735	4.82533	1.88595	4.82517	1.2922	4.82533	2.6798	4.82533	0.89325
4.8335	0.15385	4.83367	0.15465	4.83333	0.2729	4.83367	1.84605	4.8335	1.28575	4.83367	2.67265	4.83367	0.876
4.84183	0.15635	4.842	0.157	4.84167	0.2742	4.842	1.811	4.84183	1.2847	4.842	2.6627	4.842	0.8654
4.85017	0.1534	4.85033	0.155	4.85	0.27195	4.85033	1.78535	4.85017	1.27955	4.85033	2.659	4.85033	0.85185
4.8585	0.1535	4.85867	0.1562	4.85833	0.27425	4.85867	1.7622	4.8585	1.27905	4.85867	2.65335	4.85867	0.8403
4.86683	0.1536	4.867	0.15505	4.86667	0.27435	4.867	1.74325	4.86683	1.2783	4.867	2.64915	4.867	0.8296
4.87517	0.15245	4.87533	0.1557	4.875	0.27585	4.87533	1.7245	4.87517	1.2793	4.87533	2.6428	4.87533	0.82085
4.8835	0.15305	4.88367	0.15595	4.88333	0.27765	4.88367	1.71125	4.8835	1.28335	4.88367	2.63995	4.88367	0.81325
4.89183	0.1537	4.892	0.1569	4.89167	0.2806	4.892	1.7019	4.89183	1.29045	4.892	2.6359	4.892	0.80745
4.90017	0.15255	4.90033	0.1575	4.9	0.2821	4.90033	1.69135	4.90017	1.298	4.90033	2.63265	4.90033	0.80235
4.9085	0.154	4.90867	0.1569	4.90833	0.28375	4.90867	1.68345	4.9085	1.30725	4.90867	2.6282	4.90867	0.79955
4.91683	0.1551	4.917	0.15905	4.91667	0.28575	4.917	1.6776	4.91683	1.3185	4.917	2.62845	4.917	0.79595
4.92517	0.1533	4.92533	0.15795	4.925	0.28605	4.92533	1.67185	4.92517	1.3273	4.92533	2.6273	4.92533	0.7917
4.9335	0.1536	4.93367	0.1583	4.93333	0.2869	4.93367	1.6635	4.9335	1.3358	4.93367	2.62655	4.93367	0.78965
4.94183	0.15385	4.942	0.1581	4.94167	0.28735	4.942	1.6579	4.94183	1.3423	4.942	2.62575	4.942	0.7863
4.95017	0.1531	4.95033	0.15825	4.95	0.2861	4.95033	1.65225	4.95017	1.3476	4.95033	2.63415	4.95033	0.7834
4.9585	0.15245	4.95867	0.1574	4.95833	0.28545	4.95867	1.64695	4.9585	1.34805	4.95867	2.63785	4.95867	0.78275
4.96683	0.1519	4.967	0.15715	4.96667	0.28435	4.967	1.6437	4.96683	1.34665	4.967	2.6455	4.967	0.7804
4.97517	0.15095	4.97533	0.1562	4.975	0.28415	4.97533	1.6417	4.97517	1.3424	4.97533	2.6565	4.97533	0.7789
4.9835	0.1499	4.98367	0.1548	4.98333	0.28395	4.98367	1.63725	4.9835	1.33665	4.98367	2.66885	4.98367	0.7779
4.99183	0.149	4.992	0.1543	4.99167	0.28395	4.992	1.6331	4.99183	1.32735	4.992	2.67895	4.992	0.77575
5.00017	0.1502	5.00033	0.1544	5	0.2852	5.00033	1.627	5.00017	1.32085	5.00033	2.68995	5.00033	0.7762
5.0085	0.152	5.00867	0.15475	5.00833	0.28645	5.00867	1.6258	5.0085	1.3131	5.00867	2.7022	5.00867	0.77765
5.01683	0.1486	5.017	0.1545	5.01667	0.28375	5.017	1.6227	5.01683	1.3038	5.017	2.7128	5.017	0.77445
5.02517	0.1494	5.02533	0.15375	5.025	0.2853	5.02533	1.61665	5.02517	1.2967	5.02533	2.7159	5.02533	0.77665
5.0335	0.14885	5.03367	0.1545	5.03333	0.28505	5.03367	1.61665	5.0335	1.29175	5.03367	2.71985	5.03367	0.77745
5.04183	0.1496	5.042	0.155	5.04167	0.2862	5.042	1.613	5.04183	1.28575	5.042	2.7212	5.042	0.7805
5.05017	0.1476	5.05033	0.15395	5.05	0.286	5.05033	1.61015	5.05017	1.28235	5.05033	2.7212	5.05033	0.78075
5.0585	0.1492	5.05867	0.1537	5.05833	0.2866	5.05867	1.6066	5.0585	1.2825	5.05867	2.72195	5.05867	0.78615
5.06683	0.15055	5.067	0.1533	5.06667	0.28755	5.067	1.60675	5.06683	1.2834	5.067	2.72845	5.067	0.79015
5.07517	0.15145	5.07533	0.15515	5.075	0.29035	5.07533	1.6046	5.07517	1.28865	5.07533	2.7309	5.07533	0.79565
5.0835	0.1527	5.08367	0.1545	5.08333	0.29185	5.08367	1.6049	5.0835	1.29445	5.08367	2.7389	5.08367	0.80285
5.09183	0.1544	5.092	0.15705	5.09167	0.295	5.092	1.6048	5.09183	1.30455	5.092	2.74875	5.092	0.8112
5.10017	0.1576	5.10033	0.15665	5.1	0.2971	5.10033	1.60765	5.10017	1.31445	5.10033	2.75885	5.10033	0.82035
5.1085	0.16205	5.10867	0.1612	5.10833	0.3015	5.10867	1.60985	5.1085	1.32785	5.10867	2.7674	5.10867	0.8322
5.11683	0.16395	5.117	0.1614	5.11667	0.3035	5.117	1.6074	5.11683	1.33895	5.117	2.77055	5.117	0.843
5.12517	0.1673	5.12533	0.16335	5.125	0.30665	5.12533	1.60935	5.12517	1.3498	5.12533	2.77155	5.12533	0.85225
5.1335	0.1688	5.13367	0.16525	5.13333	0.31135	5.13367	1.60495	5.1335	1.35675	5.13367	2.76795	5.13367	0.8613
5.14183	0.17115	5.142	0.16675	5.14167	0.3149	5.142	1.6025	5.14183	1.3626	5.142	2.75685	5.142	0.8662
5.15017	0.1699	5.15033	0.16545	5.15	0.31645	5.15033	1.599	5.15017	1.36305	5.15033	2.7435	5.15033	0.8682
5.1585	0.17315	5.15867	0.16725	5.15833	0.31915	5.15867	1.5959	5.1585	1.3637	5.15867	2.7304	5.15867	0.8699
5.16683	0.1731	5.167	0.16725	5.16667	0.32065	5.167	1.5912	5.16683	1.36165	5.167	2.7153	5.167	0.8687
5.17517	0.1742	5.17533	0.1689	5.175	0.3245	5.17533	1.58715	5.17517	1.35775	5.17533	2.69675	5.17533	0.8642
5.1835	0.17625	5.18367	0.17055	5.18333	0.32585	5.18367	1.5817	5.1835	1.35345	5.18367	2.68035	5.18367	0.8612
5.19183	0.1748	5.192	0.1677	5.19167	0.3256	5.192	1.5773	5.19183	1.3445	5.192	2.66555	5.192	0.85455
5.20017	0.1758	5.20033	0.16865	5.2	0.3277	5.20033	1.57115	5.20017	1.3403	5.20033	2.6504	5.20033	0.8503
5.2085	0.1745	5.20867	0.1684	5.20833	0.3274	5.20867	1.5652	5.2085	1.3344	5.20867	2.6343	5.20867	0.8459
5.21683	0.1763	5.217	0.1706	5.21667	0.3296	5.217	1.56045	5.21683	1.3307	5.217	2.62135	5.217	0.8428
5.22517	0.1774	5.22533	0.1706	5.225	0.3308	5.22533	1.557	5.22517	1.3276	5.22533	2.6116	5.22533	0.8405
5.2335	0.1779	5.23367	0.17255	5.23333	0.3302	5.23367	1.55495	5.2335	1.3246	5.23367	2.6033	5.23367	0.83715
5.24183	0.1762	5.242	0.1707	5.24167	0.3315	5.242	1.5494	5.24183	1.32115	5.242	2.58845	5.242	0.83395
5.25017	0.17555	5.25033	0.17245	5.25	0.334	5.25033	1.5445	5.25017	1.3187	5.25033	2.57945	5.25033	0.8335
5.2585	0.17555	5.25867	0.1726	5.25833	0.33615	5.25867	1.54175	5.2585	1.31715	5.25867	2.57115	5.25867	0.83025
5.26683	0.17505	5.267	0.1741	5.26667	0.33855	5.267	1.53765	5.26683	1.31625	5.267	2.56435	5.267	0.8287
5.27517	0.1732	5.27533	0.1749	5.275	0.34145	5.27533	1.5331	5.27517	1.3163	5.27533	2.5563	5.27533	0.82655
5.2835	0.1731	5.28367	0.17825	5.28333	0.3462	5.28367	1.5327	5.2835	1.3184	5.28367	2.553	5.28367	0.82675
5.29183	0.1718	5.292	0.17755	5.29167	0.3462	5.292	1.5316	5.29183	1.31555	5.292	2.54755	5.292	0.82405
5.30017	0.17255	5.30033	0.1815	5.3	0.3496	5.30033	1.53025	5.30017	1.31945	5.30033	2.5433	5.30033	0.8239
5.3085	0.172	5.30867	0.1815	5.30833	0.34955	5.30867	1.52745	5.3085	1.3203	5.30867	2.53845	5.30867	0.825
5.31683	0.1716	5.317	0.1826	5.31667	0.3511	5.317	1.52695	5.31683	1.3223	5.317	2.5374	5.317	0.82475
5.32517	0.1713	5.32533	0.18185	5.325	0.3505	5.32533	1.52285	5.32517	1.32445	5.32533	2.5343	5.32533	0.8275
5.3335	0.17075	5.33367	0.1809	5.33333	0.34915	5.33367	1.52285	5.3335	1.32745	5.33367	2.53355	5.33367	0.8284
5.34183	0.1703	5.342	0.18065	5.34167	0.34615	5.342	1.52165	5.34183	1.32985	5.342	2.53185	5.342	0.8321
5.35017	0.1694	5.35033	0.18035	5.35	0.34515	5.35033	1.52225	5.35017	1.33205	5.35033	2.53165	5.35033	0.83265
5.3585	0.1676	5.35867	0.17865	5.35833	0.3434	5.35867	1.5199	5.3585	1.3329	5.35867	2.53405	5.35867	0.8355
5.36683	0.16725	5.367	0.18065	5.36667	0.3435	5.367	1.5226	5.36683	1.33575	5.367	2.53185	5.367	0.8393
5.37517	0.1658	5.37533	0.1759	5.375	0.3412	5.37533	1.51965	5.37517	1.3372	5.37533	2.5341	5.37533	0.83975
5.3835	0.1648	5.38367	0.1763	5.38333	0.3431	5.38367	1.5177	5.3835	1.3388	5.38367	2.53475	5.38367	0.8451
5.39183	0.164	5.392	0.1779	5.39167	0.3462	5.392	1.51725	5.39183	1.34395	5.392	2.53675	5.392	0.8494
5.40017	0.1653	5.40033	0.18045	5.4	0.3519	5.40033	1.5173	5.40017	1.35125	5.40033	2.5373	5.40033	0.854
5.4085	0.16405	5.40867	0.18505	5.40833	0.3577	5.40867	1.519	5.4085	1.363	5.40867	2.54005	5.40867	0.8617
5.41683	0.1659	5.417	0.19095	5.41667	0.37005	5.417	1.51765	5.41683	1.3828	5.417	2.5419	5.417	0.8812
5.42517	0.16735	5.42533	0.19975	5.425	0.38345	5.42533	1.5169	5.42517	1.4146	5.42533	2.54275	5.42533	0.9101
5.4335	0.1706	5.43367	0.20805	5.43333	0.3988	5.43367	1.5139	5.4335	1.4642	5.43367	2.5384	5.43367	0.9568
5.44183	0.1755	5.442	0.2187	5.44167	0.41955	5.442	1.5121	5.44183	1.5338	5.442	2.53975	5.442	1.02735
5.45017	0.185	5.45033	0.2287	5.45	0.43915	5.45033	1.50975	5.45017	1.6286	5.45033	2.5387	5.45033	1.12405
5.4585	0.19365	5.45867	0.23875	5.45833	0.4564	5.45867	1.5071	5.4585	1.74395	5.45867	2.53885	5.45867	1.2452
5.46683	0.2072	5.467	0.24575	5.46667	0.4703	5.467	1.50705	5.46683	1.87705	5.467	2.5418	5.467	1.395
5.47517	0.2246	5.47533	0.2503	5.475	0.4806	5.47533	1.5094	5.47517	2.01925	5.47533	2.5518	5.47533	1.5598
5.4835	0.24275	5.48367	0.2515	5.48333	0.4861	5.48367	1.51685	5.4835	2.1564	5.48367	2.56745	5.48367	1.72655
5.49183	0.2584	5.492	0.24795	5.49167	0.48345	5.492	1.5258	5.49183	2.274	5.492	2.59355	5.492	1.8803
5.50017	0.27335	5.50033	0.2429	5.5	0.4777	5.50033	1.5469	5.50017	2.36335	5.50033	2.6357	5.50033	2.0042
5.5085	0.28475	5.50867	0.23685	5.50833	0.47055	5.50867	1.5807	5.5085	2.4138	5.50867	2.7029	5.50867	2.08915
5.51683	0.2894	5.517	0.2264	5.51667	0.45885	5.517	1.62895	5.51683	2.42145	5.517	2.7913	5.517	2.1252
5.52517	0.29215	5.52533	0.2222	5.525	0.44975	5.52533	1.70135	5.52517	2.3986	5.52533	2.9073	5.52533	2.11535
5.5335	0.2899	5.53367	0.21615	5.53333	0.43855	5.53367	1.79345	5.5335	2.33985	5.53367	3.0441	5.53367	2.0644
5.54183	0.2816	5.542	0.2096	5.54167	0.43285	5.542	1.9041	5.54183	2.26145	5.542	3.19935	5.542	1.9816
5.55017	0.2711	5.55033	0.2048	5.55	0.4288	5.55033	2.02815	5.55017	2.1705	5.55033	3.35485	5.55033	1.8774
5.5585	0.25755	5.55867	0.20195	5.55833	0.43005	5.55867	2.1553	5.5585	2.0768	5.55867	3.4985	5.55867	1.7619
5.56683	0.2443	5.567	0.2004	5.56667	0.4361	5.567	2.27325	5.56683	1.98675	5.567	3.61865	5.567	1.6471
5.57517	0.2307	5.57533	0.20005	5.575	0.44865	5.57533	2.3697	5.57517	1.9006	5.57533	3.7012	5.57533	1.5372
5.5835	0.21805	5.58367	0.19845	5.58333	0.4653	5.58367	2.43515	5.5835	1.82545	5.58367	3.73885	5.58367	1.4363
5.59183	0.2077	5.592	0.2003	5.59167	0.4889	5.592	2.46745	5.59183	1.7606	5.592	3.7332	5.592	1.34795
5.60017	0.20045	5.60033	0.20245	5.6	0.51525	5.60033	2.46215	5.60017	1.70625	5.60033	3.6913	5.60033	1.27105
5.6085	0.19285	5.60867	0.20395	5.60833	0.5435	5.60867	2.4254	5.6085	1.66105	5.60867	3.6145	5.60867	1.2064
5.61683	0.18655	5.617	0.2059	5.61667	0.5708	5.617	2.3617	5.61683	1.6254	5.617	3.5166	5.617	1.15195
5.62517	0.18385	5.62533	0.2062	5.625	0.59985	5.62533	2.2804	5.62517	1.5993	5.62533	3.40585	5.62533	1.112
5.6335	0.18085	5.63367	0.20655	5.63333	0.62735	5.63367	2.19015	5.6335	1.58005	5.63367	3.29345	5.63367	1.0789
5.64183	0.17865	5.642	0.206	5.64167	0.65055	5.642	2.0979	5.64183	1.5645	5.642	3.18345	5.642	1.0513
5.65017	0.17795	5.65033	0.20685	5.65	0.6769	5.65033	2.0102	5.65017	1.5565	5.65033	3.0808	5.65033	1.0313
5.6585	0.1796	5.65867	0.2067	5.65833	0.7	5.65867	1.927	5.6585	1.5493	5.65867	2.9885	5.65867	1.016
5.66683	0.1821	5.667	0.20865	5.66667	0.7231	5.667	1.8504	5.66683	1.54405	5.667	2.90745	5.667	1.0043
5.67517	0.18645	5.67533	0.21265	5.675	0.74255	5.67533	1.7841	5.67517	1.5387	5.67533	2.8374	5.67533	0.9936
5.6835	0.1916	5.68367	0.21675	5.68333	0.7565	5.68367	1.7305	5.6835	1.53375	5.68367	2.78055	5.68367	0.98395
5.69183	0.2008	5.692	0.22875	5.69167	0.7665	5.692	1.6813	5.69183	1.52955	5.692	2.73265	5.692	0.97565
5.70017	0.2098	5.70033	0.24055	5.7	0.7693	5.70033	1.6393	5.70017	1.5236	5.70033	2.6947	5.70033	0.96775
5.7085	0.222	5.70867	0.25765	5.70833	0.76455	5.70867	1.60565	5.7085	1.5202	5.70867	2.66685	5.70867	0.958
5.71683	0.23435	5.717	0.27715	5.71667	0.7525	5.717	1.57825	5.71683	1.5184	5.717	2.64865	5.717	0.95075
5.72517	0.246	5.72533	0.2942	5.725	0.73615	5.72533	1.55915	5.72517	1.51535	5.72533	2.63205	5.72533	0.94225
5.7335	0.25465	5.73367	0.31265	5.73333	0.7161	5.73367	1.54225	5.7335	1.5156	5.73367	2.61985	5.73367	0.93635
5.74183	0.26255	5.742	0.32735	5.74167	0.6961	5.742	1.5325	5.74183	1.52385	5.742	2.61635	5.742	0.9315
5.75017	0.26635	5.75033	0.33735	5.75	0.6767	5.75033	1.5261	5.75017	1.5321	5.75033	2.62115	5.75033	0.9288
5.7585	0.2664	5.75867	0.34045	5.75833	0.6583	5.75867	1.5239	5.7585	1.54495	5.75867	2.63225	5.75867	0.92855
5.76683	0.25935	5.767	0.3377	5.76667	0.6431	5.767	1.52485	5.76683	1.55945	5.767	2.64615	5.767	0.93035
5.77517	0.2537	5.77533	0.33305	5.775	0.63255	5.77533	1.53025	5.77517	1.5734	5.77533	2.66475	5.77533	0.93545
5.7835	0.2475	5.78367	0.32625	5.78333	0.6271	5.78367	1.53565	5.7835	1.59105	5.78367	2.68615	5.78367	0.94475
5.79183	0.23715	5.792	0.31515	5.79167	0.6246	5.792	1.55165	5.79183	1.60085	5.792	2.71325	5.792	0.95
5.80017	0.22645	5.80033	0.3045	5.8	0.6263	5.80033	1.5662	5.80017	1.6071	5.80033	2.734	5.80033	0.9564
5.8085	0.21825	5.80867	0.29395	5.80833	0.6336	5.80867	1.58235	5.8085	1.61325	5.80867	2.7546	5.80867	0.96345
5.81683	0.21005	5.817	0.2822	5.81667	0.6412	5.817	1.59985	5.81683	1.6144	5.817	2.7677	5.817	0.96555
5.82517	0.2035	5.82533	0.2739	5.825	0.6527	5.82533	1.61415	5.82517	1.6157	5.82533	2.7749	5.82533	0.96505
5.8335	0.1958	5.83367	0.26405	5.83333	0.66445	5.83367	1.62445	5.8335	1.61645	5.83367	2.77155	5.83367	0.9628
5.84183	0.1913	5.842	0.2561	5.84167	0.6764	5.842	1.62845	5.84183	1.62225	5.842	2.76195	5.842	0.95805
5.85017	0.1893	5.85033	0.2517	5.85	0.68835	5.85033	1.629	5.85017	1.63195	5.85033	2.74685	5.85033	0.95335
5.8585	0.1852	5.85867	0.242	5.85833	0.6987	5.85867	1.62115	5.8585	1.6439	5.85867	2.7252	5.85867	0.9436
5.86683	0.18375	5.867	0.23755	5.86667	0.71045	5.867	1.6118	5.86683	1.6615	5.867	2.7012	5.867	0.93755
5.87517	0.1823	5.87533	0.23405	5.875	0.72125	5.87533	1.5969	5.87517	1.682	5.87533	2.67585	5.87533	0.9307
5.8835	0.1826	5.88367	0.2292	5.88333	0.73045	5.88367	1.57945	5.8835	1.69885	5.88367	2.6511	5.88367	0.92355
5.89183	0.18065	5.892	0.2252	5.89167	0.74025	5.892	1.56095	5.89183	1.7126	5.892	2.62875	5.892	0.918
5.90017	0.1799	5.90033	0.22395	5.9	0.7475	5.90033	1.544	5.90017	1.7194	5.90033	2.6079	5.90033	0.911
5.9085	0.17875	5.90867	0.2205	5.90833	0.7536	5.90867	1.52625	5.9085	1.72325	5.90867	2.58835	5.90867	0.90645
5.91683	0.17955	5.917	0.22035	5.91667	0.76375	5.917	1.511	5.91683	1.7204	5.917	2.5734	5.917	0.9035
5.92517	0.17835	5.92533	0.21885	5.925	0.77065	5.92533	1.49725	5.92517	1.71185	5.92533	2.5586	5.92533	0.9003
5.9335	0.17505	5.93367	0.2169	5.93333	0.77815	5.93367	1.4853	5.9335	1.69805	5.93367	2.54675	5.93367	0.89805
5.94183	0.17335	5.942	0.2162	5.94167	0.78525	5.942	1.47135	5.94183	1.68165	5.942	2.5367	5.942	0.89625
5.95017	0.1726	5.95033	0.21695	5.95	0.79285	5.95033	1.46315	5.95017	1.66645	5.95033	2.53125	5.95033	0.89585
5.9585	0.1693	5.95867	0.2157	5.95833	0.7991	5.95867	1.4559	5.9585	1.6484	5.95867	2.52495	5.95867	0.8938
5.96683	0.1695	5.967	0.21885	5.96667	0.80925	5.967	1.44905	5.96683	1.6342	5.967	2.5207	5.967	0.8943
5.97517	0.16755	5.97533	0.22085	5.975	0.819	5.97533	1.4444	5.97517	1.62145	5.97533	2.52005	5.97533	0.8949
5.9835	0.1662	5.98367	0.2192	5.98333	0.82495	5.98367	1.44	5.9835	1.6066	5.98367	2.52305	5.98367	0.89405
5.99183	0.16475	5.992	0.2186	5.99167	0.8319	5.992	1.43765	5.99183	1.59675	5.992	2.52165	5.992	0.8952
6.00017	0.16425	6.00033	0.22035	6	0.83745	6.00033	1.43515	6.00017	1.5895	6.00033	2.52685	6.00033	0.89785
6.0085	0.16355	6.00867	0.21785	6.00833	0.84045	6.00867	1.433	6.0085	1.58085	6.00867	2.5312	6.00867	0.8974
6.01683	0.1624	6.017	0.218	6.01667	0.84115	6.017	1.4321	6.01683	1.5772	6.017	2.53985	6.017	0.899
6.02517	0.16175	6.02533	0.21985	6.025	0.8415	6.02533	1.4303	6.02517	1.57535	6.02533	2.54695	6.02533	0.902
6.0335	0.16345	6.03367	0.219	6.03333	0.8402	6.03367	1.4333	6.0335	1.57435	6.03367	2.55695	6.03367	0.9046
6.04183	0.16235	6.042	0.2198	6.04167	0.8349	6.042	1.4338	6.04183	1.5722	6.042	2.56625	6.042	0.9066
6.05017	0.16365	6.05033	0.21975	6.05	0.8305	6.05033	1.43635	6.05017	1.5748	6.05033	2.5771	6.05033	0.9095
6.0585	0.1657	6.05867	0.2202	6.05833	0.82335	6.05867	1.43635	6.0585	1.5743	6.05867	2.5819	6.05867	0.91215
6.06683	0.16395	6.067	0.2186	6.06667	0.8144	6.067	1.43545	6.06683	1.5752	6.067	2.58555	6.067	0.91245
6.07517	0.1633	6.07533	0.21795	6.075	0.80575	6.07533	1.4335	6.07517	1.5763	6.07533	2.58585	6.07533	0.91355
6.0835	0.1638	6.08367	0.21965	6.08333	0.80095	6.08367	1.43365	6.0835	1.57935	6.08367	2.58305	6.08367	0.9153
6.09183	0.1627	6.092	0.21905	6.09167	0.79575	6.092	1.4332	6.09183	1.5811	6.092	2.5778	6.092	0.91595
6.10017	0.16235	6.10033	0.22035	6.1	0.7948	6.10033	1.42865	6.10017	1.5837	6.10033	2.57255	6.10033	0.9188
6.1085	0.1606	6.10867	0.2205	6.10833	0.79645	6.10867	1.42615	6.1085	1.58675	6.10867	2.5658	6.10867	0.921
6.11683	0.1566	6.117	0.22295	6.11667	0.802	6.117	1.42405	6.11683	1.5889	6.117	2.5567	6.117	0.92345
6.12517	0.1584	6.12533	0.22525	6.125	0.81385	6.12533	1.4204	6.12517	1.59555	6.12533	2.5513	6.12533	0.92895
6.1335	0.1563	6.13367	0.2249	6.13333	0.82695	6.13367	1.4177	6.1335	1.5978	6.13367	2.5455	6.13367	0.9311
6.14183	0.1564	6.142	0.2275	6.14167	0.84355	6.142	1.41485	6.14183	1.60355	6.142	2.54075	6.142	0.93495
6.15017	0.1565	6.15033	0.2305	6.15	0.86245	6.15033	1.41275	6.15017	1.60865	6.15033	2.5373	6.15033	0.93955
6.1585	0.15795	6.15867	0.23315	6.15833	0.8841	6.15867	1.41005	6.1585	1.6157	6.15867	2.53465	6.15867	0.9451
6.16683	0.1562	6.167	0.2334	6.16667	0.9041	6.167	1.4098	6.16683	1.62155	6.167	2.53455	6.167	0.9489
6.17517	0.15675	6.17533	0.23595	6.175	0.92275	6.17533	1.40925	6.17517	1.6292	6.17533	2.53185	6.17533	0.95605
6.1835	0.1543	6.18367	0.2348	6.18333	0.93745	6.18367	1.40705	6.1835	1.63555	6.18367	2.5303	6.18367	0.96195
6.19183	0.15775	6.192	0.2358	6.19167	0.95115	6.192	1.40715	6.19183	1.6436	6.192	2.531	6.192	0.96995
6.20017	0.15765	6.20033	0.23515	6.2	0.95645	6.20033	1.4061	6.20017	1.6504	6.20033	2.52995	6.20033	0.9766
6.2085	0.159	6.20867	0.23615	6.20833	0.9594	6.20867	1.4044	6.2085	1.65825	6.20867	2.5307	6.20867	0.9861
6.21683	0.15795	6.217	0.2367	6.21667	0.954	6.217	1.4049	6.21683	1.66455	6.217	2.5321	6.217	0.99415
6.22517	0.16035	6.22533	0.23605	6.225	0.94605	6.22533	1.4042	6.22517	1.67155	6.22533	2.53625	6.22533	1.00455
6.2335	0.16015	6.23367	0.23565	6.23333	0.9312	6.23367	1.4071	6.2335	1.6754	6.23367	2.53965	6.23367	1.0124
6.24183	0.16145	6.242	0.23575	6.24167	0.91555	6.242	1.40685	6.24183	1.68165	6.242	2.54245	6.242	1.0264
6.25017	0.16035	6.25033	0.2352	6.25	0.89435	6.25033	1.4067	6.25017	1.68455	6.25033	2.5434	6.25033	1.03705
6.2585	0.16055	6.25867	0.2349	6.25833	0.873	6.25867	1.40655	6.2585	1.689	6.25867	2.5472	6.25867	1.0491
6.26683	0.1577	6.267	0.234	6.26667	0.84905	6.267	1.40515	6.26683	1.69115	6.267	2.5494	6.267	1.0602
6.27517	0.1575	6.27533	0.2338	6.275	0.8254	6.27533	1.4056	6.27517	1.6945	6.27533	2.55355	6.27533	1.07285
6.2835	0.1541	6.28367	0.23365	6.28333	0.80125	6.28367	1.4074	6.2835	1.6956	6.28367	2.559	6.28367	1.0831
6.29183	0.1525	6.292	0.2335	6.29167	0.77975	6.292	1.40785	6.29183	1.69815	6.292	2.5624	6.292	1.09425
6.30017	0.1511	6.30033	0.23395	6.3	0.761	6.30033	1.40615	6.30017	1.70025	6.30033	2.56465	6.30033	1.1032
6.3085	0.1474	6.30867	0.23575	6.30833	0.7447	6.30867	1.4103	6.3085	1.7029	6.30867	2.57065	6.30867	1.11245
6.31683	0.14755	6.317	0.2381	6.31667	0.7332	6.317	1.4089	6.31683	1.7065	6.317	2.5746	6.317	1.12245
6.32517	0.1447	6.32533	0.2371	6.325	0.72135	6.32533	1.40795	6.32517	1.70835	6.32533	2.57935	6.32533	1.1298
6.3335	0.14165	6.33367	0.23815	6.33333	0.7128	6.33367	1.40915	6.3335	1.71035	6.33367	2.58195	6.33367	1.136
6.34183	0.1412	6.342	0.24065	6.34167	0.70925	6.342	1.4094	6.34183	1.71565	6.342	2.58805	6.342	1.14365
6.35017	0.141	6.35033	0.2428	6.35	0.71145	6.35033	1.4104	6.35017	1.7204	6.35033	2.59045	6.35033	1.1538
6.3585	0.1394	6.35867	0.2461	6.35833	0.71475	6.35867	1.4105	6.3585	1.7254	6.35867	2.59395	6.35867	1.16315
6.36683	0.1363	6.367	0.24705	6.36667	0.72385	6.367	1.41015	6.36683	1.72845	6.367	2.5956	6.367	1.17295
6.37517	0.13585	6.37533	0.2515	6.375	0.74125	6.37533	1.4093	6.37517	1.73655	6.37533	2.596	6.37533	1.18725
6.3835	0.13425	6.38367	0.25485	6.38333	0.76225	6.38367	1.4094	6.3835	1.7432	6.38367	2.59765	6.38367	1.20125
6.39183	0.13205	6.392	0.2591	6.39167	0.78985	6.392	1.40765	6.39183	1.75235	6.392	2.5974	6.392	1.21785
6.40017	0.13345	6.40033	0.26455	6.4	0.82625	6.40033	1.40465	6.40017	1.7637	6.40033	2.59575	6.40033	1.238
6.4085	0.134	6.40867	0.2713	6.40833	0.86545	6.40867	1.4043	6.4085	1.7753	6.40867	2.59655	6.40867	1.2571
6.41683	0.13325	6.417	0.2752	6.41667	0.9077	6.417	1.4047	6.41683	1.7896	6.417	2.59875	6.417	1.277
6.42517	0.13365	6.42533	0.2795	6.425	0.95425	6.42533	1.40145	6.42517	1.8075	6.42533	2.60035	6.42533	1.29855
6.4335	0.1331	6.43367	0.28545	6.43333	0.9993	6.43367	1.40015	6.4335	1.82505	6.43367	2.602	6.43367	1.32155
6.44183	0.13425	6.442	0.29115	6.44167	1.04345	6.442	1.39865	6.44183	1.84625	6.442	2.606	6.442	1.3457
6.45017	0.1328	6.45033	0.29395	6.45	1.08185	6.45033	1.3965	6.45017	1.86745	6.45033	2.6107	6.45033	1.3685
6.4585	0.13435	6.45867	0.29985	6.45833	1.11705	6.45867	1.3972	6.4585	1.8921	6.45867	2.61465	6.45867	1.3937
6.46683	0.13595	6.467	0.30395	6.46667	1.14275	6.467	1.3965	6.46683	1.9172	6.467	2.62035	6.467	1.4208
6.47517	0.136	6.47533	0.3082	6.475	1.16125	6.47533	1.39595	6.47517	1.9384	6.47533	2.627	6.47533	1.4482
6.4835	0.13625	6.48367	0.31	6.48333	1.1712	6.48367	1.3982	6.4835	1.9575	6.48367	2.63505	6.48367	1.4785
6.49183	0.13745	6.492	0.31475	6.49167	1.17245	6.492	1.39665	6.49183	1.97635	6.492	2.64085	6.492	1.51015
6.50017	0.1401	6.50033	0.317	6.5	1.1648	6.50033	1.3978	6.50017	1.99165	6.50033	2.64985	6.50033	1.54725
6.5085	0.13895	6.50867	0.3186	6.50833	1.1478	6.50867	1.39925	6.5085	2.0001	6.50867	2.6608	6.50867	1.5804
6.51683	0.1418	6.517	0.3214	6.51667	1.1254	6.517	1.40035	6.51683	2.0074	6.517	2.67195	6.517	1.6195
6.52517	0.1411	6.52533	0.32465	6.525	1.09735	6.52533	1.40115	6.52517	2.0119	6.52533	2.68105	6.52533	1.6588
6.5335	0.14225	6.53367	0.3294	6.53333	1.0661	6.53367	1.4026	6.5335	2.0169	6.53367	2.69235	6.53367	1.70245
6.54183	0.1417	6.542	0.33305	6.54167	1.0337	6.542	1.40725	6.54183	2.0184	6.542	2.70875	6.542	1.74635
6.55017	0.1411	6.55033	0.3377	6.55	0.998	6.55033	1.40915	6.55017	2.02065	6.55033	2.7199	6.55033	1.79455
6.5585	0.1407	6.55867	0.34185	6.55833	0.96585	6.55867	1.4122	6.5585	2.0228	6.55867	2.7354	6.55867	1.84475
6.56683	0.13875	6.567	0.3455	6.56667	0.9318	6.567	1.4165	6.56683	2.02475	6.567	2.75125	6.567	1.8981
6.57517	0.13805	6.57533	0.3513	6.575	0.90175	6.57533	1.4193	6.57517	2.02935	6.57533	2.7702	6.57533	1.95325
6.5835	0.1362	6.58367	0.35775	6.58333	0.87415	6.58367	1.4259	6.5835	2.035	6.58367	2.79	6.58367	2.01135
6.59183	0.1343	6.592	0.36545	6.59167	0.8515	6.592	1.43155	6.59183	2.04095	6.592	2.8128	6.592	2.07375
6.60017	0.1341	6.60033	0.37385	6.6	0.8344	6.60033	1.43975	6.60017	2.0494	6.60033	2.8374	6.60033	2.13975
6.6085	0.13285	6.60867	0.3829	6.60833	0.82065	6.60867	1.4485	6.6085	2.05965	6.60867	2.86285	6.60867	2.2053
6.61683	0.1313	6.617	0.39445	6.61667	0.80915	6.617	1.4572	6.61683	2.0698	6.617	2.8884	6.617	2.27745
6.62517	0.1305	6.62533	0.40945	6.625	0.8018	6.62533	1.46585	6.62517	2.0821	6.62533	2.9148	6.62533	2.3528
6.6335	0.1303	6.63367	0.4331	6.63333	0.8016	6.63367	1.47225	6.6335	2.0973	6.63367	2.93865	6.63367	2.43215
6.64183	0.12865	6.642	0.48125	6.64167	0.8002	6.642	1.48065	6.64183	2.1101	6.642	2.96505	6.642	2.51315
6.65017	0.1273	6.65033	0.59975	6.65	0.8066	6.65033	1.48885	6.65017	2.12855	6.65033	2.99035	6.65033	2.5998
6.6585	0.12815	6.65867	0.87505	6.65833	0.81425	6.65867	1.4983	6.6585	2.1476	6.65867	3.0159	6.65867	2.69325
6.66683	0.1263	6.667	1.45825	6.66667	0.82865	6.667	1.50495	6.66683	2.1687	6.667	3.0423	6.667	2.79365
6.67517	0.12645	6.67533	2.5377	6.675	0.84625	6.67533	1.5133	6.67517	2.1932	6.67533	3.068	6.67533	2.90385
6.6835	0.12705	6.68367	4.27875	6.68333	0.87455	6.68367	1.52105	6.6835	2.2214	6.68367	3.09265	6.68367	3.0317
6.69183	0.1275	6.692	6.78305	6.69167	0.9159	6.692	1.5272	6.69183	2.25635	6.692	3.11795	6.692	3.18625
6.70017	0.1271	6.70033	10.0158	6.7	0.98565	6.70033	1.5348	6.70017	2.29975	6.70033	3.1454	6.70033	3.3948
6.7085	0.12735	6.70867	13.7994	6.70833	1.08945	6.70867	1.54185	6.7085	2.35945	6.70867	3.17295	6.70867	3.69755
6.71683	0.12825	6.717	17.8481	6.71667	1.24945	6.717	1.54975	6.71683	2.45385	6.717	3.2039	6.717	4.1659
6.72517	0.13035	6.72533	21.7881	6.725	1.4697	6.72533	1.55905	6.72517	2.6144	6.72533	3.23665	6.72533	4.9075
6.7335	0.1312	6.73367	25.2626	6.73333	1.7449	6.73367	1.5721	6.7335	2.8841	6.73367	3.2746	6.73367	6.049
6.74183	0.12945	6.742	27.9942	6.74167	2.06125	6.742	1.58035	6.74183	3.3256	6.742	3.3099	6.742	7.7252
6.75017	0.13065	6.75033	29.819	6.75	2.39615	6.75033	1.59285	6.75017	4.00275	6.75033	3.35175	6.75033	10.0414
6.7585	0.1312	6.75867	30.6936	6.75833	2.72585	6.75867	1.60575	6.7585	4.9606	6.75867	3.3928	6.75867	13.0206
6.76683	0.1297	6.767	30.7117	6.76667	3.0241	6.767	1.622	6.76683	6.20125	6.767	3.44385	6.767	16.5735
6.77517	0.13	6.77533	30.0215	6.775	3.28005	6.77533	1.63395	6.77517	7.6898	6.77533	3.49215	6.77533	20.505
6.7835	0.1315	6.78367	28.8132	6.78333	3.48275	6.78367	1.65465	6.7835	9.34065	6.78367	3.5523	6.78367	24.56
6.79183	0.13325	6.792	27.253	6.79167	3.6341	6.792	1.67275	6.79183	11.0459	6.792	3.61295	6.792	28.4308
6.80017	0.1334	6.80033	25.501	6.8	3.73315	6.80033	1.6955	6.80017	12.6815	6.80033	3.6804	6.80033	31.8534
6.8085	0.13965	6.80867	23.6744	6.80833	3.793	6.80867	1.71765	6.8085	14.1578	6.80867	3.74795	6.80867	34.6504
6.81683	0.14615	6.817	21.8573	6.81667	3.81435	6.817	1.7421	6.81683	15.4057	6.817	3.82215	6.817	36.73
6.82517	0.1555	6.82533	20.1044	6.825	3.80625	6.82533	1.7666	6.82517	16.3887	6.82533	3.8974	6.82533	38.078
6.8335	0.1681	6.83367	18.4586	6.83333	3.7742	6.83367	1.79245	6.8335	17.0935	6.83367	3.97625	6.83367	38.7535
6.84183	0.1872	6.842	16.9343	6.84167	3.72615	6.842	1.82155	6.84183	17.5533	6.842	4.061	6.842	38.8681
6.85017	0.20825	6.85033	15.5467	6.85	3.6629	6.85033	1.84795	6.85017	17.8041	6.85033	4.14755	6.85033	38.526
6.8585	0.23265	6.85867	14.2871	6.85833	3.59105	6.85867	1.8786	6.8585	17.878	6.85867	4.24355	6.85867	37.8463
6.86683	0.2552	6.867	13.1509	6.86667	3.50915	6.867	1.9118	6.86683	17.8159	6.867	4.34525	6.867	36.9145
6.87517	0.27915	6.87533	12.1447	6.875	3.4278	6.87533	1.9481	6.87517	17.6643	6.87533	4.4559	6.87533	35.8229
6.8835	0.2992	6.88367	11.2393	6.88333	3.3407	6.88367	1.98835	6.8835	17.4408	6.88367	4.57585	6.88367	34.6167
6.89183	0.3163	6.892	10.4286	6.89167	3.2564	6.892	2.0362	6.89183	17.1804	6.892	4.7165	6.892	33.3604
6.90017	0.32965	6.90033	9.70585	6.9	3.17235	6.90033	2.0993	6.90017	16.8995	6.90033	4.8827	6.90033	32.0796
6.9085	0.33675	6.90867	9.06495	6.90833	3.0899	6.90867	2.19075	6.9085	16.6208	6.90867	5.10415	6.90867	30.8048
6.91683	0.34235	6.917	8.4909	6.91667	3.01075	6.917	2.34105	6.91683	16.3541	6.917	5.41435	6.917	29.5549
6.92517	0.3443	6.92533	7.98375	6.925	2.9365	6.92533	2.61065	6.92517	16.107	6.92533	5.8732	6.92533	28.3492
6.9335	0.34315	6.93367	7.5281	6.93333	2.865	6.93367	3.0932	6.9335	15.8734	6.93367	6.5505	6.93367	27.19
6.94183	0.33825	6.942	7.12265	6.94167	2.8004	6.942	3.92125	6.94183	15.6515	6.942	7.5336	6.942	26.0998
6.95017	0.33415	6.95033	6.7592	6.95	2.7398	6.95033	5.23935	6.95017	15.4319	6.95033	8.894	6.95033	25.0778
6.9585	0.3269	6.95867	6.4285	6.95833	2.684	6.95867	7.1617	6.9585	15.1953	6.95867	10.6607	6.95867	24.0956
6.96683	0.3184	6.967	6.12815	6.96667	2.6338	6.967	9.73575	6.96683	14.9367	6.967	12.817	6.967	23.1769
6.97517	0.3116	6.97533	5.85175	6.975	2.5851	6.97533	12.904	6.97517	14.6422	6.97533	15.2734	6.97533	22.3224
6.9835	0.30545	6.98367	5.5953	6.98333	2.539	6.98367	16.4894	6.9835	14.3107	6.98367	17.8876	6.98367	21.5253
6.99183	0.2954	6.992	5.3507	6.99167	2.48895	6.992	20.2413	6.99183	13.9396	6.992	20.4859	6.992	20.7795
7.00017	0.28545	7.00033	5.1171	7	2.43655	7.00033	23.8586	7.00017	13.5373	7.00033	22.9095	7.00033	20.0933
7.0085	0.27735	7.00867	4.8954	7.00833	2.3797	7.00867	27.0901	7.0085	13.1125	7.00867	25.0225	7.00867	19.4591
7.01683	0.26915	7.017	4.68365	7.01667	2.32135	7.017	29.7211	7.01683	12.6705	7.017	26.7559	7.017	18.8663
7.02517	0.2606	7.02533	4.48155	7.025	2.25885	7.02533	31.6474	7.02517	12.2166	7.02533	28.0678	7.02533	18.3143
7.0335	0.2558	7.03367	4.29155	7.03333	2.1961	7.03367	32.8976	7.0335	11.7723	7.03367	28.9775	7.03367	17.8009
7.04183	0.25065	7.042	4.10875	7.04167	2.13095	7.042	33.5362	7.04183	11.3332	7.042	29.5229	7.042	17.3111
7.05017	0.24795	7.05033	3.9384	7.05	2.0725	7.05033	33.6628	7.05017	10.9099	7.05033	29.7595	7.05033	16.8448
7.0585	0.24535	7.05867	3.78045	7.05833	2.0162	7.05867	33.4092	7.0585	10.5039	7.05867	29.7199	7.05867	16.3898
7.06683	0.24435	7.067	3.6347	7.06667	1.9691	7.067	32.8768	7.06683	10.1179	7.067	29.4722	7.067	15.9465
7.07517	0.2435	7.07533	3.49605	7.075	1.92695	7.07533	32.1463	7.07517	9.747	7.07533	29.0738	7.07533	15.5061
7.0835	0.2411	7.08367	3.3661	7.08333	1.8933	7.08367	31.2747	7.0835	9.39285	7.08367	28.5561	7.08367	15.0703
7.09183	0.238	7.092	3.2504	7.09167	1.8705	7.092	30.3213	7.09183	9.0609	7.092	27.9507	7.092	14.6432
7.10017	0.23245	7.10033	3.13905	7.1	1.85415	7.10033	29.3167	7.10017	8.7483	7.10033	27.2922	7.10033	14.2249
7.1085	0.2268	7.10867	3.03445	7.10833	1.84785	7.10867	28.2903	7.1085	8.4578	7.10867	26.5911	7.10867	13.8202
7.11683	0.2158	7.117	2.93865	7.11667	1.85075	7.117	27.2551	7.11683	8.1881	7.117	25.8608	7.117	13.4306
7.12517	0.21015	7.12533	2.84875	7.125	1.8642	7.12533	26.2251	7.12517	7.9408	7.12533	25.1192	7.12533	13.0641
7.1335	0.2013	7.13367	2.76085	7.13333	1.8817	7.13367	25.2076	7.1335	7.71215	7.13367	24.3704	7.13367	12.7171
7.14183	0.19325	7.142	2.6791	7.14167	1.90565	7.142	24.2074	7.14183	7.50265	7.142	23.6282	7.142	12.3893
7.15017	0.1859	7.15033	2.60375	7.15	1.9346	7.15033	23.226	7.15017	7.3142	7.15033	22.8943	7.15033	12.0738
7.1585	0.1791	7.15867	2.5301	7.15833	1.96205	7.15867	22.2752	7.1585	7.1395	7.15867	22.1741	7.15867	11.7792
7.16683	0.17365	7.167	2.46045	7.16667	1.98925	7.167	21.3481	7.16683	6.98	7.167	21.4687	7.167	11.5018
7.17517	0.1683	7.17533	2.395	7.175	2.0122	7.17533	20.442	7.17517	6.8335	7.17533	20.7847	7.17533	11.2399
7.1835	0.16585	7.18367	2.3334	7.18333	2.02735	7.18367	19.5687	7.1835	6.69515	7.18367	20.1168	7.18367	10.9919
7.19183	0.16215	7.192	2.2722	7.19167	2.034	7.192	18.7303	7.19183	6.5701	7.192	19.4733	7.192	10.7578
7.20017	0.1586	7.20033	2.21485	7.2	2.0325	7.20033	17.9232	7.20017	6.4557	7.20033	18.8516	7.20033	10.5335
7.2085	0.15505	7.20867	2.16035	7.20833	2.0188	7.20867	17.1413	7.2085	6.3452	7.20867	18.2557	7.20867	10.3161
7.21683	0.1528	7.217	2.10875	7.21667	1.99605	7.217	16.3964	7.21683	6.2417	7.217	17.6783	7.217	10.1072
7.22517	0.15145	7.22533	2.0594	7.225	1.9629	7.22533	15.6882	7.22517	6.14605	7.22533	17.1243	7.22533	9.9073
7.2335	0.1482	7.23367	2.0114	7.23333	1.92145	7.23367	15.0149	7.2335	6.05285	7.23367	16.6001	7.23367	9.71365
7.24183	0.148	7.242	1.96675	7.24167	1.8751	7.242	14.375	7.24183	5.9683	7.242	16.0918	7.242	9.52945
7.25017	0.1473	7.25033	1.9231	7.25	1.82045	7.25033	13.7788	7.25017	5.88825	7.25033	15.608	7.25033	9.35005
7.2585	0.1473	7.25867	1.88425	7.25833	1.76475	7.25867	13.2144	7.2585	5.8138	7.25867	15.1542	7.25867	9.1777
7.26683	0.14565	7.267	1.84405	7.26667	1.70345	7.267	12.6837	7.26683	5.73865	7.267	14.7285	7.267	9.00575
7.27517	0.14555	7.27533	1.8074	7.275	1.64355	7.27533	12.1917	7.27517	5.6676	7.27533	14.334	7.27533	8.8394
7.2835	0.1451	7.28367	1.7698	7.28333	1.5822	7.28367	11.7366	7.2835	5.5978	7.28367	13.9651	7.28367	8.6756
7.29183	0.1434	7.292	1.7367	7.29167	1.5236	7.292	11.3182	7.29183	5.5301	7.292	13.6257	7.292	8.5174
7.30017	0.14205	7.30033	1.7031	7.3	1.4636	7.30033	10.9319	7.30017	5.46305	7.30033	13.299	7.30033	8.3602
7.3085	0.14035	7.30867	1.67135	7.30833	1.4087	7.30867	10.5755	7.3085	5.39855	7.30867	12.9779	7.30867	8.20885
7.31683	0.1394	7.317	1.6414	7.31667	1.3571	7.317	10.2418	7.31683	5.3367	7.317	12.6654	7.317	8.0636
7.32517	0.138	7.32533	1.61155	7.325	1.30975	7.32533	9.91865	7.32517	5.27595	7.32533	12.3503	7.32533	7.9234
7.3335	0.1352	7.33367	1.5845	7.33333	1.26545	7.33367	9.60595	7.3335	5.21535	7.33367	12.0318	7.33367	7.7858
7.34183	0.1348	7.342	1.5585	7.34167	1.2259	7.342	9.29615	7.34183	5.15965	7.342	11.7096	7.342	7.65235
7.35017	0.1344	7.35033	1.534	7.35	1.18735	7.35033	8.98725	7.35017	5.1055	7.35033	11.3857	7.35033	7.52555
7.3585	0.13395	7.35867	1.5101	7.35833	1.15575	7.35867	8.677	7.3585	5.05285	7.35867	11.0618	7.35867	7.40365
7.36683	0.13235	7.367	1.48465	7.36667	1.12605	7.367	8.36855	7.36683	5.0023	7.367	10.7411	7.367	7.2876
7.37517	0.13155	7.37533	1.4612	7.375	1.09765	7.37533	8.07155	7.37517	4.95345	7.37533	10.4314	7.37533	7.17605
7.3835	0.13265	7.38367	1.44135	7.38333	1.0764	7.38367	7.7825	7.3835	4.91235	7.38367	10.1332	7.38367	7.0753
7.39183	0.13085	7.392	1.41945	7.39167	1.0541	7.392	7.50265	7.39183	4.8683	7.392	9.84725	7.392	6.9759
7.40017	0.13245	7.40033	1.4002	7.4	1.03685	7.40033	7.2349	7.40017	4.8287	7.40033	9.5754	7.40033	6.8801
7.4085	0.13215	7.40867	1.38025	7.40833	1.02005	7.40867	6.98305	7.4085	4.7915	7.40867	9.31945	7.40867	6.78685
7.41683	0.13145	7.417	1.36025	7.41667	1.00375	7.417	6.7454	7.41683	4.754	7.417	9.08015	7.417	6.6953
7.42517	0.1324	7.42533	1.34195	7.425	0.9902	7.42533	6.52195	7.42517	4.7192	7.42533	8.8534	7.42533	6.6037
7.4335	0.13525	7.43367	1.3275	7.43333	0.98145	7.43367	6.31235	7.4335	4.68705	7.43367	8.63455	7.43367	6.5152
7.44183	0.13485	7.442	1.31015	7.44167	0.97245	7.442	6.11515	7.44183	4.65755	7.442	8.43045	7.442	6.4252
7.45017	0.1377	7.45033	1.29485	7.45	0.965	7.45033	5.9268	7.45017	4.6265	7.45033	8.23755	7.45033	6.33435
7.4585	0.13845	7.45867	1.2775	7.45833	0.95535	7.45867	5.7473	7.4585	4.59525	7.45867	8.05345	7.45867	6.2435
7.46683	0.1417	7.467	1.26265	7.46667	0.94685	7.467	5.57905	7.46683	4.5676	7.467	7.8807	7.467	6.15485
7.47517	0.142	7.47533	1.2472	7.475	0.93955	7.47533	5.41755	7.47517	4.5402	7.47533	7.71495	7.47533	6.06825
7.4835	0.1436	7.48367	1.23265	7.48333	0.92995	7.48367	5.26525	7.4835	4.51205	7.48367	7.5581	7.48367	5.9819
7.49183	0.145	7.492	1.21955	7.49167	0.9207	7.492	5.1167	7.49183	4.48745	7.492	7.4058	7.492	5.8983
7.50017	0.14525	7.50033	1.2032	7.5	0.91035	7.50033	4.9771	7.50017	4.4618	7.50033	7.25925	7.50033	5.8151
7.5085	0.14765	7.50867	1.18995	7.50833	0.89945	7.50867	4.84415	7.5085	4.43925	7.50867	7.12065	7.50867	5.738
7.51683	0.1461	7.517	1.17705	7.51667	0.89065	7.517	4.7167	7.51683	4.4152	7.517	6.9871	7.517	5.66005
7.52517	0.14585	7.52533	1.1615	7.525	0.88	7.52533	4.59345	7.52517	4.39305	7.52533	6.85715	7.52533	5.58235
7.5335	0.14505	7.53367	1.149	7.53333	0.8692	7.53367	4.477	7.5335	4.37	7.53367	6.7341	7.53367	5.5067
7.54183	0.1451	7.542	1.13545	7.54167	0.8604	7.542	4.36635	7.54183	4.3474	7.542	6.6185	7.542	5.43485
7.55017	0.14615	7.55033	1.1223	7.55	0.8501	7.55033	4.261	7.55017	4.32615	7.55033	6.50475	7.55033	5.36405
7.5585	0.14465	7.55867	1.1093	7.55833	0.83995	7.55867	4.1592	7.5585	4.30425	7.55867	6.39585	7.55867	5.2957
7.56683	0.1434	7.567	1.0967	7.56667	0.8298	7.567	4.06045	7.56683	4.2831	7.567	6.2927	7.567	5.2287
7.57517	0.14125	7.57533	1.0839	7.575	0.8214	7.57533	3.96555	7.57517	4.2608	7.57533	6.1944	7.57533	5.1641
7.5835	0.14025	7.58367	1.07	7.58333	0.8124	7.58367	3.87625	7.5835	4.2388	7.58367	6.1007	7.58367	5.09775
7.59183	0.13895	7.592	1.0584	7.59167	0.80305	7.592	3.78975	7.59183	4.21805	7.592	6.0083	7.592	5.0359
7.60017	0.13795	7.60033	1.0469	7.6	0.795	7.60033	3.7069	7.60017	4.19625	7.60033	5.9215	7.60033	4.97275
7.6085	0.13675	7.60867	1.0363	7.60833	0.7873	7.60867	3.62855	7.6085	4.17505	7.60867	5.8414	7.60867	4.9117
7.61683	0.13545	7.617	1.02745	7.61667	0.7807	7.617	3.55205	7.61683	4.1537	7.617	5.761	7.617	4.85085
7.62517	0.13475	7.62533	1.019	7.625	0.7749	7.62533	3.4796	7.62517	4.13435	7.62533	5.6824	7.62533	4.79325
7.6335	0.13225	7.63367	1.0087	7.63333	0.76795	7.63367	3.40915	7.6335	4.11215	7.63367	5.607	7.63367	4.73055
7.64183	0.12995	7.642	1.00165	7.64167	0.7648	7.642	3.34055	7.64183	4.09135	7.642	5.5356	7.642	4.6739
7.65017	0.12905	7.65033	0.9929	7.65	0.76085	7.65033	3.27535	7.65017	4.0707	7.65033	5.4709	7.65033	4.61585
7.6585	0.12645	7.65867	0.98295	7.65833	0.7545	7.65867	3.2109	7.6585	4.049	7.65867	5.40305	7.65867	4.55835
7.66683	0.1268	7.667	0.97455	7.66667	0.75135	7.667	3.15145	7.66683	4.03015	7.667	5.33775	7.667	4.50385
7.67517	0.12395	7.67533	0.9654	7.675	0.7469	7.67533	3.09055	7.67517	4.0107	7.67533	5.27385	7.67533	4.45005
7.6835	0.1223	7.68367	0.9566	7.68333	0.7417	7.68367	3.03395	7.6835	3.9912	7.68367	5.21625	7.68367	4.3953
7.69183	0.12445	7.692	0.9507	7.69167	0.7406	7.692	2.97875	7.69183	3.97435	7.692	5.15765	7.692	4.34765
7.70017	0.12295	7.70033	0.9415	7.7	0.73615	7.70033	2.92615	7.70017	3.95655	7.70033	5.1024	7.70033	4.2986
7.7085	0.1216	7.70867	0.93265	7.70833	0.73135	7.70867	2.8749	7.7085	3.94145	7.70867	5.0475	7.70867	4.2509
7.71683	0.1222	7.717	0.9264	7.71667	0.72835	7.717	2.82245	7.71683	3.92735	7.717	4.99475	7.717	4.20585
7.72517	0.1222	7.72533	0.91825	7.725	0.7247	7.72533	2.77415	7.72517	3.91225	7.72533	4.94455	7.72533	4.16135
7.7335	0.1229	7.73367	0.9098	7.73333	0.72325	7.73367	2.72725	7.7335	3.89875	7.73367	4.89545	7.73367	4.1193
7.74183	0.124	7.742	0.90335	7.74167	0.7197	7.742	2.68465	7.74183	3.88485	7.742	4.8502	7.742	4.07695
7.75017	0.1233	7.75033	0.89505	7.75	0.71565	7.75033	2.6405	7.75017	3.8708	7.75033	4.8013	7.75033	4.0368
7.7585	0.1215	7.75867	0.8862	7.75833	0.7108	7.75867	2.59575	7.7585	3.8553	7.75867	4.7557	7.75867	3.9966
7.76683	0.123	7.767	0.88045	7.76667	0.70855	7.767	2.5547	7.76683	3.84315	7.767	4.70935	7.767	3.9592
7.77517	0.12285	7.77533	0.87265	7.775	0.7051	7.77533	2.51415	7.77517	3.828	7.77533	4.66515	7.77533	3.92025
7.7835	0.1233	7.78367	0.8656	7.78333	0.70025	7.78367	2.47485	7.7835	3.81515	7.78367	4.62225	7.78367	3.8828
7.79183	0.12095	7.792	0.85795	7.79167	0.6975	7.792	2.4365	7.79183	3.801	7.792	4.5814	7.792	3.8442
7.80017	0.12155	7.80033	0.8513	7.8	0.6954	7.80033	2.40095	7.80017	3.78815	7.80033	4.5405	7.80033	3.8067
7.8085	0.1221	7.80867	0.84625	7.80833	0.6918	7.80867	2.36575	7.8085	3.7764	7.80867	4.50005	7.80867	3.76695
7.81683	0.1227	7.817	0.83945	7.81667	0.68995	7.817	2.3328	7.81683	3.76375	7.817	4.46195	7.817	3.7295
7.82517	0.12145	7.82533	0.8316	7.825	0.6865	7.82533	2.29805	7.82517	3.75055	7.82533	4.4213	7.82533	3.68865
7.8335	0.1226	7.83367	0.8282	7.83333	0.6854	7.83367	2.2642	7.8335	3.7385	7.83367	4.3849	7.83367	3.6485
7.84183	0.12015	7.842	0.82165	7.84167	0.68305	7.842	2.23145	7.84183	3.72335	7.842	4.34685	7.842	3.60645
7.85017	0.1228	7.85033	0.81715	7.85	0.68225	7.85033	2.203	7.85017	3.7113	7.85033	4.31445	7.85033	3.568
7.8585	0.12155	7.85867	0.81205	7.85833	0.6805	7.85867	2.1737	7.8585	3.697	7.85867	4.2815	7.85867	3.5259
7.86683	0.12055	7.867	0.8081	7.86667	0.67815	7.867	2.1413	7.86683	3.68165	7.867	4.24685	7.867	3.48505
7.87517	0.11955	7.87533	0.8019	7.875	0.6764	7.87533	2.1145	7.87517	3.66575	7.87533	4.2126	7.87533	3.44415
7.8835	0.1198	7.88367	0.799	7.88333	0.6757	7.88367	2.08875	7.8835	3.65095	7.88367	4.1826	7.88367	3.40575
7.89183	0.12035	7.892	0.7958	7.89167	0.6766	7.892	2.0601	7.89183	3.6371	7.892	4.1491	7.892	3.36785
7.90017	0.1207	7.90033	0.7949	7.9	0.67905	7.90033	2.0324	7.90017	3.6232	7.90033	4.1173	7.90033	3.33245
7.9085	0.1183	7.90867	0.79095	7.90833	0.6767	7.90867	2.0067	7.9085	3.60785	7.90867	4.08705	7.90867	3.29585
7.91683	0.1198	7.917	0.78985	7.91667	0.67735	7.917	1.98285	7.91683	3.5964	7.917	4.05865	7.917	3.2641
7.92517	0.12065	7.92533	0.78725	7.925	0.6777	7.92533	1.9573	7.92517	3.5846	7.92533	4.02885	7.92533	3.2345
7.9335	0.12135	7.93367	0.7843	7.93333	0.6756	7.93367	1.9322	7.9335	3.5736	7.93367	3.9994	7.93367	3.2061
7.94183	0.11965	7.942	0.77935	7.94167	0.67275	7.942	1.9104	7.94183	3.56465	7.942	3.9725	7.942	3.18115
7.95017	0.1203	7.95033	0.7742	7.95	0.6699	7.95033	1.8879	7.95017	3.5578	7.95033	3.94785	7.95033	3.15875
7.9585	0.1209	7.95867	0.7671	7.95833	0.66515	7.95867	1.8651	7.9585	3.54935	7.95867	3.92035	7.95867	3.1373
7.96683	0.1234	7.967	0.76145	7.96667	0.6604	7.967	1.84415	7.96683	3.5446	7.967	3.89505	7.967	3.1211
7.97517	0.1213	7.97533	0.754	7.975	0.653	7.97533	1.82485	7.97517	3.53715	7.97533	3.8726	7.97533	3.10675
7.9835	0.1218	7.98367	0.7451	7.98333	0.6459	7.98367	1.8079	7.9835	3.5333	7.98367	3.85025	7.98367	3.0931
7.99183	0.1234	7.992	0.73715	7.99167	0.63915	7.992	1.7885	7.99183	3.52805	7.992	3.82505	7.992	3.0826
8.00017	0.12405	8.00033	0.7318	8	0.6324	8.00033	1.7722	8.00017	3.52305	8.00033	3.80395	8.00033	3.07535
8.0085	0.12565	8.00867	0.7234	8.00833	0.62595	8.00867	1.75445	8.0085	3.51785	8.00867	3.77955	8.00867	3.0667
8.01683	0.1263	8.017	0.71615	8.01667	0.6179	8.017	1.73655	8.01683	3.50985	8.017	3.7542	8.017	3.0601
8.02517	0.12795	8.02533	0.70825	8.025	0.61045	8.02533	1.72075	8.02517	3.49865	8.02533	3.7335	8.02533	3.05215
8.0335	0.1297	8.03367	0.70355	8.03333	0.6074	8.03367	1.7027	8.0335	3.48995	8.03367	3.71095	8.03367	3.0476
8.04183	0.12835	8.042	0.6983	8.04167	0.6017	8.042	1.68595	8.04183	3.4789	8.042	3.6899	8.042	3.03855
8.05017	0.12805	8.05033	0.69185	8.05	0.5969	8.05033	1.67045	8.05017	3.465	8.05033	3.6685	8.05033	3.02545
8.0585	0.1283	8.05867	0.68735	8.05833	0.59285	8.05867	1.651	8.0585	3.4511	8.05867	3.6437	8.05867	3.00785
8.06683	0.128	8.067	0.6824	8.06667	0.59165	8.067	1.637	8.06683	3.43675	8.067	3.6223	8.067	2.9857
8.07517	0.12615	8.07533	0.6775	8.075	0.5878	8.07533	1.62185	8.07517	3.42025	8.07533	3.60255	8.07533	2.9566
8.0835	0.125	8.08367	0.67115	8.08333	0.58555	8.08367	1.60385	8.0835	3.40285	8.08367	3.5785	8.08367	2.9203
8.09183	0.1233	8.092	0.6679	8.09167	0.5852	8.092	1.59	8.09183	3.38655	8.092	3.55585	8.092	2.8799
8.10017	0.1228	8.10033	0.66355	8.1	0.583	8.10033	1.5745	8.10017	3.36875	8.10033	3.5349	8.10033	2.83615
8.1085	0.12145	8.10867	0.65935	8.10833	0.5825	8.10867	1.56225	8.1085	3.3514	8.10867	3.51545	8.10867	2.79085
8.11683	0.12235	8.117	0.6562	8.11667	0.58255	8.117	1.548	8.11683	3.33185	8.117	3.49375	8.117	2.74495
8.12517	0.121	8.12533	0.6527	8.125	0.5819	8.12533	1.53525	8.12517	3.31615	8.12533	3.4738	8.12533	2.6991
8.1335	0.11965	8.13367	0.6476	8.13333	0.58065	8.13367	1.5192	8.1335	3.3008	8.13367	3.45085	8.13367	2.6545
8.14183	0.1175	8.142	0.6418	8.14167	0.57795	8.142	1.50415	8.14183	3.2837	8.142	3.42825	8.142	2.60985
8.15017	0.1185	8.15033	0.6404	8.15	0.57845	8.15033	1.49005	8.15017	3.2688	8.15033	3.40575	8.15033	2.5706
8.1585	0.1161	8.15867	0.634	8.15833	0.57425	8.15867	1.47855	8.1585	3.25305	8.15867	3.3872	8.15867	2.5317
8.16683	0.11505	8.167	0.6321	8.16667	0.57305	8.167	1.46485	8.16683	3.23855	8.167	3.3686	8.167	2.4964
8.17517	0.1131	8.17533	0.6263	8.175	0.57005	8.17533	1.4515	8.17517	3.22415	8.17533	3.3473	8.17533	2.4627
8.1835	0.11455	8.18367	0.6248	8.18333	0.56755	8.18367	1.4395	8.1835	3.2126	8.18367	3.32695	8.18367	2.4329
8.19183	0.1143	8.192	0.6191	8.19167	0.5635	8.192	1.42415	8.19183	3.20085	8.192	3.3085	8.192	2.4034
8.20017	0.11365	8.20033	0.6154	8.2	0.5613	8.20033	1.41175	8.20017	3.1889	8.20033	3.29115	8.20033	2.3763
8.2085	0.11435	8.20867	0.6123	8.20833	0.5586	8.20867	1.39835	8.2085	3.1784	8.20867	3.27235	8.20867	2.3513
8.21683	0.11355	8.217	0.60755	8.21667	0.5535	8.217	1.38565	8.21683	3.16405	8.217	3.256	8.217	2.3259
8.22517	0.11445	8.22533	0.60685	8.225	0.5515	8.22533	1.37435	8.22517	3.15535	8.22533	3.24265	8.22533	2.3024
8.2335	0.11515	8.23367	0.6027	8.23333	0.54525	8.23367	1.36875	8.2335	3.1434	8.23367	3.2324	8.23367	2.2794
8.24183	0.11515	8.242	0.59915	8.24167	0.54225	8.242	1.36095	8.24183	3.1326	8.242	3.21965	8.242	2.25605
8.25017	0.11565	8.25033	0.5958	8.25	0.5387	8.25033	1.35105	8.25017	3.12085	8.25033	3.2104	8.25033	2.23545
8.2585	0.11405	8.25867	0.5914	8.25833	0.5355	8.25867	1.3468	8.2585	3.10975	8.25867	3.20265	8.25867	2.21345
8.26683	0.1142	8.267	0.58915	8.26667	0.53115	8.267	1.3445	8.26683	3.09785	8.267	3.19635	8.267	2.19245
8.27517	0.1131	8.27533	0.5852	8.275	0.5275	8.27533	1.3403	8.27517	3.0866	8.27533	3.1847	8.27533	2.17145
8.2835	0.11515	8.28367	0.58465	8.28333	0.52695	8.28367	1.3403	8.2835	3.07675	8.28367	3.17955	8.28367	2.1538
8.29183	0.11535	8.292	0.58115	8.29167	0.5249	8.292	1.3362	8.29183	3.0669	8.292	3.16685	8.292	2.13465
8.30017	0.11655	8.30033	0.58095	8.3	0.52335	8.30033	1.33495	8.30017	3.05665	8.30033	3.15345	8.30033	2.11785
8.3085	0.11585	8.30867	0.57785	8.30833	0.52235	8.30867	1.33065	8.3085	3.04495	8.30867	3.1382	8.30867	2.09955
8.31683	0.11705	8.317	0.5752	8.31667	0.52115	8.317	1.3271	8.31683	3.0355	8.317	3.12205	8.317	2.08265
8.32517	0.11735	8.32533	0.5729	8.325	0.5215	8.32533	1.31775	8.32517	3.0266	8.32533	3.1032	8.32533	2.06555
8.3335	0.1186	8.33367	0.57125	8.33333	0.5224	8.33367	1.3085	8.3335	3.01735	8.33367	3.0816	8.33367	2.04815
8.34183	0.11725	8.342	0.5671	8.34167	0.52175	8.342	1.2973	8.34183	3.0065	8.342	3.0594	8.342	2.0321
8.35017	0.11695	8.35033	0.5643	8.35	0.52075	8.35033	1.28145	8.35017	2.99615	8.35033	3.0347	8.35033	2.01415
8.3585	0.11805	8.35867	0.56475	8.35833	0.52465	8.35867	1.2649	8.3585	2.9869	8.35867	3.01335	8.35867	1.9996
8.36683	0.1197	8.367	0.5626	8.36667	0.52705	8.367	1.2517	8.36683	2.9808	8.367	2.9912	8.367	1.98645
8.37517	0.12015	8.37533	0.562	8.375	0.52965	8.37533	1.23575	8.37517	2.9722	8.37533	2.9688	8.37533	1.9709
8.3835	0.12135	8.38367	0.56065	8.38333	0.5338	8.38367	1.2189	8.3835	2.96435	8.38367	2.9482	8.38367	1.95605
8.39183	0.12155	8.392	0.5571	8.39167	0.53455	8.392	1.20615	8.39183	2.956	8.392	2.92995	8.392	1.94105
8.40017	0.122	8.40033	0.5537	8.4	0.5353	8.40033	1.1917	8.40017	2.9472	8.40033	2.9125	8.40033	1.92735
8.4085	0.12555	8.40867	0.55395	8.40833	0.53885	8.40867	1.1763	8.4085	2.9415	8.40867	2.894	8.40867	1.91555
8.41683	0.1273	8.417	0.55145	8.41667	0.5418	8.417	1.16775	8.41683	2.9344	8.417	2.8807	8.417	1.9029
8.42517	0.12695	8.42533	0.54725	8.425	0.54055	8.42533	1.15655	8.42517	2.92375	8.42533	2.86585	8.42533	1.8883
8.4335	0.1288	8.43367	0.54575	8.43333	0.5405	8.43367	1.14445	8.4335	2.9154	8.43367	2.8513	8.43367	1.87575
8.44183	0.1297	8.442	0.5428	8.44167	0.5395	8.442	1.13515	8.44183	2.90655	8.442	2.83865	8.442	1.86295
8.45017	0.13105	8.45033	0.5379	8.45	0.537	8.45033	1.12585	8.45017	2.8961	8.45033	2.82495	8.45033	1.8496
8.4585	0.1302	8.45867	0.5354	8.45833	0.5346	8.45867	1.1177	8.4585	2.8853	8.45867	2.8106	8.45867	1.83665
8.46683	0.1311	8.467	0.5326	8.46667	0.5326	8.467	1.11025	8.46683	2.8773	8.467	2.79865	8.467	1.8222
8.47517	0.13225	8.47533	0.5301	8.475	0.52965	8.47533	1.1038	8.47517	2.86865	8.47533	2.78645	8.47533	1.80995
8.4835	0.13345	8.48367	0.52625	8.48333	0.52645	8.48367	1.09445	8.4835	2.8588	8.48367	2.77165	8.48367	1.79675
8.49183	0.1331	8.492	0.5232	8.49167	0.5192	8.492	1.09	8.49183	2.8462	8.492	2.75995	8.492	1.78315
8.50017	0.1337	8.50033	0.5212	8.5	0.5161	8.50033	1.08295	8.50017	2.8388	8.50033	2.74565	8.50033	1.7716
8.5085	0.1343	8.50867	0.51845	8.50833	0.51275	8.50867	1.075	8.5085	2.8285	8.50867	2.7325	8.50867	1.75935
8.51683	0.13475	8.517	0.51395	8.51667	0.50725	8.517	1.0674	8.51683	2.81775	8.517	2.71855	8.517	1.74635
8.52517	0.1335	8.52533	0.5109	8.525	0.5035	8.52533	1.0606	8.52517	2.8075	8.52533	2.70475	8.52533	1.7339
8.5335	0.1344	8.53367	0.5083	8.53333	0.49825	8.53367	1.0526	8.5335	2.7977	8.53367	2.6899	8.53367	1.72135
8.54183	0.13465	8.542	0.506	8.54167	0.4958	8.542	1.0437	8.54183	2.7881	8.542	2.67665	8.542	1.70905
8.55017	0.13595	8.55033	0.50515	8.55	0.49325	8.55033	1.03675	8.55017	2.77985	8.55033	2.6622	8.55033	1.69775
8.5585	0.13665	8.55867	0.5027	8.55833	0.4906	8.55867	1.0283	8.5585	2.7707	8.55867	2.6464	8.55867	1.68545
8.56683	0.13605	8.567	0.5	8.56667	0.4871	8.567	1.02005	8.56683	2.7612	8.567	2.63235	8.567	1.6728
8.57517	0.13665	8.57533	0.4988	8.575	0.48645	8.57533	1.01205	8.57517	2.75125	8.57533	2.62085	8.57533	1.66
8.5835	0.13655	8.58367	0.4972	8.58333	0.48405	8.58367	1.00365	8.5835	2.7429	8.58367	2.6061	8.58367	1.64845
8.59183	0.13595	8.592	0.49435	8.59167	0.4824	8.592	0.9933	8.59183	2.7327	8.592	2.59145	8.592	1.63665
8.60017	0.13785	8.60033	0.49545	8.6	0.48525	8.60033	0.98925	8.60017	2.7258	8.60033	2.58155	8.60033	1.62815
8.6085	0.1369	8.60867	0.49265	8.60833	0.483	8.60867	0.98285	8.6085	2.71585	8.60867	2.5695	8.60867	1.6162
8.61683	0.13675	8.617	0.4905	8.61667	0.48325	8.617	0.97515	8.61683	2.7054	8.617	2.55755	8.617	1.60585
8.62517	0.1369	8.62533	0.49015	8.625	0.4859	8.62533	0.9694	8.62517	2.6978	8.62533	2.5445	8.62533	1.5981
8.6335	0.1367	8.63367	0.4872	8.63333	0.48755	8.63367	0.9619	8.6335	2.68935	8.63367	2.53275	8.63367	1.59045
8.64183	0.1367	8.642	0.48515	8.64167	0.488	8.642	0.95565	8.64183	2.6798	8.642	2.52115	8.642	1.58045
8.65017	0.13525	8.65033	0.4816	8.65	0.4896	8.65033	0.9475	8.65017	2.6715	8.65033	2.5078	8.65033	1.57235
8.6585	0.1368	8.65867	0.4793	8.65833	0.49345	8.65867	0.9439	8.6585	2.66545	8.65867	2.49815	8.65867	1.56705
8.66683	0.1382	8.667	0.4759	8.66667	0.49905	8.667	0.9404	8.66683	2.65825	8.667	2.48875	8.667	1.5612
8.67517	0.1376	8.67533	0.4747	8.675	0.50565	8.67533	0.93285	8.67517	2.6517	8.67533	2.4776	8.67533	1.55445
8.6835	0.1383	8.68367	0.46935	8.68333	0.51075	8.68367	0.9284	8.6835	2.6435	8.68367	2.4672	8.68367	1.54835
8.69183	0.14135	8.692	0.4691	8.69167	0.51945	8.692	0.9243	8.69183	2.6383	8.692	2.45705	8.692	1.54385
8.70017	0.14045	8.70033	0.46355	8.7	0.5272	8.70033	0.918	8.70017	2.62965	8.70033	2.4475	8.70033	1.53685
8.7085	0.13955	8.70867	0.4591	8.70833	0.53445	8.70867	0.91305	8.7085	2.61995	8.70867	2.4355	8.70867	1.5276
8.71683	0.14085	8.717	0.45635	8.71667	0.54465	8.717	0.90815	8.71683	2.61275	8.717	2.42575	8.717	1.5199
8.72517	0.1407	8.72533	0.4547	8.725	0.5524	8.72533	0.9029	8.72517	2.604	8.72533	2.41445	8.72533	1.5104
8.7335	0.14045	8.73367	0.45185	8.73333	0.56055	8.73367	0.8991	8.7335	2.5954	8.73367	2.40595	8.73367	1.50025
8.74183	0.13885	8.742	0.449	8.74167	0.5673	8.742	0.8926	8.74183	2.58495	8.742	2.39365	8.742	1.4877
8.75017	0.1382	8.75033	0.44475	8.75	0.57355	8.75033	0.8879	8.75017	2.5764	8.75033	2.3818	8.75033	1.47705
8.7585	0.137	8.75867	0.4416	8.75833	0.5767	8.75867	0.88185	8.7585	2.56735	8.75867	2.37025	8.75867	1.4658
8.76683	0.1356	8.767	0.439	8.76667	0.5795	8.767	0.87735	8.76683	2.55855	8.767	2.36015	8.767	1.4548
8.77517	0.1326	8.77533	0.4359	8.775	0.57755	8.77533	0.87155	8.77517	2.5484	8.77533	2.34675	8.77533	1.4427
8.7835	0.13255	8.78367	0.4351	8.78333	0.57595	8.78367	0.8649	8.7835	2.5401	8.78367	2.3357	8.78367	1.43385
8.79183	0.1318	8.792	0.43355	8.79167	0.5715	8.792	0.86175	8.79183	2.53085	8.792	2.32655	8.792	1.42225
8.80017	0.1302	8.80033	0.42985	8.8	0.5621	8.80033	0.8562	8.80017	2.5204	8.80033	2.3149	8.80033	1.41065
8.8085	0.1277	8.80867	0.42765	8.80833	0.5542	8.80867	0.85065	8.8085	2.51155	8.80867	2.3044	8.80867	1.4022
8.81683	0.12605	8.817	0.426	8.81667	0.5456	8.817	0.8448	8.81683	2.5015	8.817	2.29215	8.817	1.39225
8.82517	0.1259	8.82533	0.42495	8.825	0.5361	8.82533	0.84065	8.82517	2.4936	8.82533	2.283	8.82533	1.3851
8.8335	0.12465	8.83367	0.42425	8.83333	0.52725	8.83367	0.8357	8.8335	2.485	8.83367	2.27065	8.83367	1.37585
8.84183	0.1226	8.842	0.42585	8.84167	0.5208	8.842	0.8318	8.84183	2.47575	8.842	2.26265	8.842	1.3694
8.85017	0.12145	8.85033	0.42825	8.85	0.51565	8.85033	0.82995	8.85017	2.46865	8.85033	2.25285	8.85033	1.36385
8.8585	0.121	8.85867	0.43205	8.85833	0.5114	8.85867	0.8249	8.8585	2.45735	8.85867	2.2441	8.85867	1.35615
8.86683	0.12075	8.867	0.44035	8.86667	0.51355	8.867	0.8232	8.86683	2.4511	8.867	2.23435	8.867	1.3511
8.87517	0.11905	8.87533	0.45195	8.875	0.51845	8.87533	0.81865	8.87517	2.44285	8.87533	2.2244	8.87533	1.3462
8.8835	0.1189	8.88367	0.46635	8.88333	0.5285	8.88367	0.8128	8.8835	2.43845	8.88367	2.21625	8.88367	1.3426
8.89183	0.11825	8.892	0.48535	8.89167	0.5417	8.892	0.80955	8.89183	2.4314	8.892	2.2065	8.892	1.34245
8.90017	0.11425	8.90033	0.50415	8.9	0.55445	8.90033	0.8067	8.90017	2.42305	8.90033	2.1961	8.90033	1.343
8.9085	0.1166	8.90867	0.52815	8.90833	0.5704	8.90867	0.8032	8.9085	2.4221	8.90867	2.1881	8.90867	1.3515
8.91683	0.1153	8.917	0.54945	8.91667	0.58165	8.917	0.7999	8.91683	2.4212	8.917	2.18085	8.917	1.36435
8.92517	0.11545	8.92533	0.5659	8.925	0.58925	8.92533	0.7982	8.92517	2.42505	8.92533	2.17245	8.92533	1.3865
8.9335	0.1159	8.93367	0.58285	8.93333	0.5955	8.93367	0.7928	8.9335	2.43715	8.93367	2.16155	8.93367	1.4182
8.94183	0.1181	8.942	0.5909	8.94167	0.59285	8.942	0.788	8.94183	2.453	8.942	2.15355	8.942	1.45995
8.95017	0.1205	8.95033	0.59185	8.95	0.5872	8.95033	0.78695	8.95017	2.4734	8.95033	2.1479	8.95033	1.5104
8.9585	0.1245	8.95867	0.58845	8.95833	0.5729	8.95867	0.78485	8.9585	2.50245	8.95867	2.13975	8.95867	1.5687
8.96683	0.12885	8.967	0.57805	8.96667	0.55655	8.967	0.782	8.96683	2.53295	8.967	2.13115	8.967	1.62925
8.97517	0.1379	8.97533	0.5651	8.975	0.53975	8.97533	0.77915	8.97517	2.56885	8.97533	2.1253	8.97533	1.68915
8.9835	0.14625	8.98367	0.54685	8.98333	0.519	8.98367	0.7761	8.9835	2.6016	8.98367	2.119	8.98367	1.74115
8.99183	0.15765	8.992	0.5278	8.99167	0.4998	8.992	0.77335	8.99183	2.6304	8.992	2.1101	8.992	1.7826
9.00017	0.1693	9.00033	0.50675	9	0.48355	9.00033	0.76985	9.00017	2.65195	9.00033	2.10265	9.00033	1.80605
9.0085	0.18075	9.00867	0.48865	9.00833	0.466	9.00867	0.76845	9.0085	2.6637	9.00867	2.09445	9.00867	1.81255
9.01683	0.1895	9.017	0.4693	9.01667	0.44855	9.017	0.76515	9.01683	2.66235	9.017	2.084	9.017	1.7971
9.02517	0.1966	9.02533	0.4527	9.025	0.43555	9.02533	0.7618	9.02517	2.649	9.02533	2.0764	9.02533	1.7667
9.0335	0.2034	9.03367	0.4392	9.03333	0.4231	9.03367	0.75925	9.0335	2.6279	9.03367	2.06675	9.03367	1.72555
9.04183	0.20525	9.042	0.4271	9.04167	0.4126	9.042	0.75645	9.04183	2.59875	9.042	2.05995	9.042	1.6734
9.05017	0.2031	9.05033	0.41445	9.05	0.40305	9.05033	0.7533	9.05017	2.5638	9.05033	2.0499	9.05033	1.6165
9.0585	0.19945	9.05867	0.4058	9.05833	0.39655	9.05867	0.7493	9.0585	2.52665	9.05867	2.0395	9.05867	1.56145
9.06683	0.1916	9.067	0.3956	9.06667	0.3888	9.067	0.7457	9.06683	2.48595	9.067	2.0304	9.067	1.5028
9.07517	0.18645	9.07533	0.38995	9.075	0.383	9.07533	0.73985	9.07517	2.4515	9.07533	2.0203	9.07533	1.45185
9.0835	0.1777	9.08367	0.3851	9.08333	0.3794	9.08367	0.73835	9.0835	2.41715	9.08367	2.01335	9.08367	1.40325
9.09183	0.16565	9.092	0.3803	9.09167	0.37465	9.092	0.73355	9.09183	2.3848	9.092	2.00365	9.092	1.35895
9.10017	0.15755	9.10033	0.37455	9.1	0.3711	9.10033	0.7317	9.10017	2.35695	9.10033	1.99715	9.10033	1.322
9.1085	0.1505	9.10867	0.3724	9.10833	0.3693	9.10867	0.72615	9.1085	2.33105	9.10867	1.98855	9.10867	1.28955
9.11683	0.1422	9.117	0.36835	9.11667	0.365	9.117	0.72365	9.11683	2.309	9.117	1.9793	9.117	1.2604
9.12517	0.13585	9.12533	0.36465	9.125	0.3645	9.12533	0.71765	9.12517	2.2883	9.12533	1.97145	9.12533	1.2366
9.1335	0.13085	9.13367	0.3613	9.13333	0.3612	9.13367	0.713	9.1335	2.2704	9.13367	1.9625	9.13367	1.2153
9.14183	0.1263	9.142	0.35915	9.14167	0.36	9.142	0.7092	9.14183	2.25515	9.142	1.9536	9.142	1.1985
9.15017	0.12165	9.15033	0.3575	9.15	0.3585	9.15033	0.7045	9.15017	2.24	9.15033	1.9459	9.15033	1.18245
9.1585	0.119	9.15867	0.3549	9.15833	0.3568	9.15867	0.70255	9.1585	2.22715	9.15867	1.9416	9.15867	1.1699
9.16683	0.1181	9.167	0.35485	9.16667	0.35385	9.167	0.70015	9.16683	2.2169	9.167	1.9381	9.167	1.1597
9.17517	0.11455	9.17533	0.3534	9.175	0.3532	9.17533	0.69755	9.17517	2.2058	9.17533	1.9349	9.17533	1.14985
9.1835	0.11305	9.18367	0.3504	9.18333	0.3531	9.18367	0.6938	9.1835	2.1959	9.18367	1.93565	9.18367	1.1399
9.19183	0.1109	9.192	0.34975	9.19167	0.352	9.192	0.6923	9.19183	2.186	9.192	1.9415	9.192	1.133
9.20017	0.1094	9.20033	0.34685	9.2	0.34955	9.20033	0.69095	9.20017	2.17595	9.20033	1.95445	9.20033	1.1244
9.2085	0.1078	9.20867	0.34545	9.20833	0.3483	9.20867	0.69165	9.2085	2.16625	9.20867	1.9788	9.20867	1.11695
9.21683	0.1084	9.217	0.34445	9.21667	0.3492	9.217	0.69175	9.21683	2.15885	9.217	2.0138	9.217	1.11365
9.22517	0.1075	9.22533	0.3424	9.225	0.34705	9.22533	0.69615	9.22517	2.1499	9.22533	2.0704	9.22533	1.10815
9.2335	0.109	9.23367	0.3428	9.23333	0.34615	9.23367	0.70365	9.2335	2.14385	9.23367	2.14245	9.23367	1.10305
9.24183	0.1098	9.242	0.34285	9.24167	0.34575	9.242	0.717	9.24183	2.137	9.242	2.2338	9.242	1.0997
9.25017	0.1086	9.25033	0.34015	9.25	0.34445	9.25033	0.73525	9.25017	2.12925	9.25033	2.33955	9.25033	1.09495
9.2585	0.10805	9.25867	0.3372	9.25833	0.3427	9.25867	0.75975	9.2585	2.12225	9.25867	2.45835	9.25867	1.0887
9.26683	0.10835	9.267	0.3381	9.26667	0.3413	9.267	0.7903	9.26683	2.11535	9.267	2.578	9.267	1.08515
9.27517	0.10785	9.27533	0.3363	9.275	0.3421	9.27533	0.83335	9.27517	2.1103	9.27533	2.6943	9.27533	1.08125
9.2835	0.106	9.28367	0.33275	9.28333	0.3382	9.28367	0.8834	9.2835	2.1016	9.28367	2.7928	9.28367	1.07485
9.29183	0.10615	9.292	0.3327	9.29167	0.33645	9.292	0.93735	9.29183	2.0966	9.292	2.86495	9.292	1.0714
9.30017	0.105	9.30033	0.3304	9.3	0.3362	9.30033	0.9937	9.30017	2.09005	9.30033	2.9059	9.30033	1.068
9.3085	0.10575	9.30867	0.33125	9.30833	0.33595	9.30867	1.04685	9.3085	2.08635	9.30867	2.9104	9.30867	1.0648
9.31683	0.1053	9.317	0.3277	9.31667	0.33475	9.317	1.08825	9.31683	2.08065	9.317	2.87815	9.317	1.0607
9.32517	0.1064	9.32533	0.3269	9.325	0.3346	9.32533	1.11815	9.32517	2.07635	9.32533	2.81735	9.32533	1.059
9.3335	0.10445	9.33367	0.3234	9.33333	0.33155	9.33367	1.13525	9.3335	2.06915	9.33367	2.7351	9.33367	1.0542
9.34183	0.1048	9.342	0.32435	9.34167	0.33075	9.342	1.1323	9.34183	2.06635	9.342	2.6302	9.342	1.05285
9.35017	0.1036	9.35033	0.3221	9.35	0.328	9.35033	1.11365	9.35017	2.06045	9.35033	2.51835	9.35033	1.0503
9.3585	0.10455	9.35867	0.3217	9.35833	0.3284	9.35867	1.08215	9.3585	2.0541	9.35867	2.40565	9.35867	1.048
9.36683	0.1025	9.367	0.3191	9.36667	0.3263	9.367	1.0408	9.36683	2.0475	9.367	2.2953	9.367	1.0452
9.37517	0.10335	9.37533	0.319	9.375	0.32755	9.37533	0.98955	9.37517	2.04185	9.37533	2.1895	9.37533	1.0438
9.3835	0.10465	9.38367	0.31745	9.38333	0.32885	9.38367	0.93685	9.3835	2.0349	9.38367	2.0966	9.38367	1.04265
9.39183	0.10135	9.392	0.31385	9.39167	0.32675	9.392	0.88335	9.39183	2.02545	9.392	2.0139	9.392	1.03755
9.40017	0.10305	9.40033	0.3143	9.4	0.3272	9.40033	0.8322	9.40017	2.02015	9.40033	1.94255	9.40033	1.0365
9.4085	0.10265	9.40867	0.31385	9.40833	0.32705	9.40867	0.7847	9.4085	2.0136	9.40867	1.88215	9.40867	1.0357
9.41683	0.1018	9.417	0.3117	9.41667	0.3272	9.417	0.74575	9.41683	2.00555	9.417	1.8329	9.417	1.0343
9.42517	0.1015	9.42533	0.31095	9.425	0.32725	9.42533	0.71345	9.42517	1.99945	9.42533	1.7929	9.42533	1.03485
9.4335	0.1016	9.43367	0.3095	9.43333	0.32835	9.43367	0.6828	9.4335	1.99315	9.43367	1.7574	9.43367	1.0376
9.44183	0.10345	9.442	0.30945	9.44167	0.32985	9.442	0.66145	9.44183	1.99005	9.442	1.73045	9.442	1.0448
9.45017	0.1029	9.45033	0.3086	9.45	0.33045	9.45033	0.6417	9.45017	1.9865	9.45033	1.7079	9.45033	1.05625
9.4585	0.10085	9.45867	0.3066	9.45833	0.32975	9.45867	0.6311	9.4585	1.98225	9.45867	1.6915	9.45867	1.07095
9.46683	0.1014	9.467	0.3065	9.46667	0.33	9.467	0.61915	9.46683	1.9827	9.467	1.67275	9.467	1.09295
9.47517	0.1012	9.47533	0.30245	9.475	0.3298	9.47533	0.6127	9.47517	1.985	9.47533	1.66145	9.47533	1.12065
9.4835	0.1022	9.48367	0.3014	9.48333	0.3322	9.48367	0.6063	9.4835	1.99085	9.48367	1.6494	9.48367	1.1558
9.49183	0.1004	9.492	0.3014	9.49167	0.33195	9.492	0.60085	9.49183	1.99825	9.492	1.6377	9.492	1.1931
9.50017	0.10235	9.50033	0.30075	9.5	0.3314	9.50033	0.59695	9.50017	2.00985	9.50033	1.63105	9.50033	1.23495
9.5085	0.1023	9.50867	0.29815	9.50833	0.3314	9.50867	0.5935	9.5085	2.0222	9.50867	1.6247	9.50867	1.2749
9.51683	0.1022	9.517	0.29735	9.51667	0.33285	9.517	0.58895	9.51683	2.03345	9.517	1.621	9.517	1.3119
9.52517	0.1001	9.52533	0.2941	9.525	0.3312	9.52533	0.5861	9.52517	2.04245	9.52533	1.61765	9.52533	1.3365
9.5335	0.1014	9.53367	0.29425	9.53333	0.3331	9.53367	0.58345	9.5335	2.05085	9.53367	1.61905	9.53367	1.3564
9.54183	0.1023	9.542	0.2942	9.54167	0.3328	9.542	0.58315	9.54183	2.0562	9.542	1.6186	9.542	1.3633
9.55017	0.1024	9.55033	0.2933	9.55	0.33205	9.55033	0.5794	9.55017	2.05635	9.55033	1.61835	9.55033	1.35845
9.5585	0.1016	9.55867	0.291	9.55833	0.3316	9.55867	0.5778	9.5585	2.0503	9.55867	1.6179	9.55867	1.3428
9.56683	0.1024	9.567	0.29055	9.56667	0.3313	9.567	0.5767	9.56683	2.0407	9.567	1.6197	9.567	1.324
9.57517	0.10255	9.57533	0.2896	9.575	0.3297	9.57533	0.5753	9.57517	2.02695	9.57533	1.61725	9.57533	1.2952
9.5835	0.10235	9.58367	0.28925	9.58333	0.32855	9.58367	0.574	9.5835	2.01025	9.58367	1.61535	9.58367	1.264
9.59183	0.10095	9.592	0.2869	9.59167	0.3271	9.592	0.57095	9.59183	1.99065	9.592	1.61235	9.592	1.2312
9.60017	0.1026	9.60033	0.28825	9.6	0.32655	9.60033	0.57025	9.60017	1.9713	9.60033	1.6094	9.60033	1.1994
9.6085	0.1013	9.60867	0.2877	9.60833	0.3252	9.60867	0.57105	9.6085	1.95275	9.60867	1.60725	9.60867	1.1677
9.61683	0.10185	9.617	0.28695	9.61667	0.32225	9.617	0.5704	9.61683	1.9339	9.617	1.6	9.617	1.1387
9.62517	0.10085	9.62533	0.28665	9.625	0.32115	9.62533	0.57055	9.62517	1.9162	9.62533	1.59615	9.62533	1.11325
9.6335	0.10015	9.63367	0.2839	9.63333	0.31865	9.63367	0.56585	9.6335	1.89865	9.63367	1.5866	9.63367	1.08705
9.64183	0.1009	9.642	0.2839	9.64167	0.3185	9.642	0.5646	9.64183	1.8832	9.642	1.5798	9.642	1.06545
9.65017	0.09965	9.65033	0.2844	9.65	0.3167	9.65033	0.56405	9.65017	1.86975	9.65033	1.57135	9.65033	1.04615
9.6585	0.10075	9.65867	0.283	9.65833	0.31485	9.65867	0.5609	9.6585	1.85795	9.65867	1.5643	9.65867	1.02845
9.66683	0.1005	9.667	0.28175	9.66667	0.31285	9.667	0.56045	9.66683	1.8467	9.667	1.5574	9.667	1.0122
9.67517	0.10125	9.67533	0.2816	9.675	0.3127	9.67533	0.5586	9.67517	1.8365	9.67533	1.5467	9.67533	0.9981
9.6835	0.1019	9.68367	0.28075	9.68333	0.31045	9.68367	0.55465	9.6835	1.8276	9.68367	1.54075	9.68367	0.98385
9.69183	0.10075	9.692	0.27885	9.69167	0.308	9.692	0.55145	9.69183	1.8208	9.692	1.535	9.692	0.97185
9.70017	0.10015	9.70033	0.2771	9.7	0.3073	9.70033	0.54825	9.70017	1.8121	9.70033	1.52865	9.70033	0.9593
9.7085	0.1012	9.70867	0.2781	9.70833	0.306	9.70867	0.54505	9.7085	1.8072	9.70867	1.52555	9.70867	0.95035
9.71683	0.1008	9.717	0.2754	9.71667	0.3045	9.717	0.54075	9.71683	1.79875	9.717	1.5196	9.717	0.93825
9.72517	0.10185	9.72533	0.2753	9.725	0.30445	9.72533	0.5381	9.72517	1.7938	9.72533	1.51895	9.72533	0.9321
9.7335	0.1021	9.73367	0.27635	9.73333	0.3062	9.73367	0.53795	9.7335	1.7898	9.73367	1.5225	9.73367	0.9264
9.74183	0.103	9.742	0.27485	9.74167	0.30445	9.742	0.53555	9.74183	1.78285	9.742	1.52425	9.742	0.9181
9.75017	0.10245	9.75033	0.2735	9.75	0.30315	9.75033	0.5327	9.75017	1.77705	9.75033	1.5275	9.75033	0.91245
9.7585	0.10195	9.75867	0.2735	9.75833	0.3033	9.75867	0.5314	9.7585	1.7719	9.75867	1.53255	9.75867	0.9095
9.76683	0.1041	9.767	0.273	9.76667	0.3042	9.767	0.5295	9.76683	1.767	9.767	1.53865	9.767	0.9049
9.77517	0.1028	9.77533	0.27055	9.775	0.30405	9.77533	0.5281	9.77517	1.7624	9.77533	1.54495	9.77533	0.8998
9.7835	0.1017	9.78367	0.2703	9.78333	0.30365	9.78367	0.5284	9.7835	1.75525	9.78367	1.55	9.78367	0.8963
9.79183	0.10345	9.792	0.26995	9.79167	0.3026	9.792	0.5291	9.79183	1.75085	9.792	1.55065	9.792	0.89505
9.80017	0.10265	9.80033	0.2688	9.8	0.30395	9.80033	0.5299	9.80017	1.74515	9.80033	1.5505	9.80033	0.8928
9.8085	0.10285	9.80867	0.269	9.80833	0.3036	9.80867	0.52985	9.8085	1.74	9.80867	1.54365	9.80867	0.892
9.81683	0.10055	9.817	0.2668	9.81667	0.30415	9.817	0.5315	9.81683	1.73475	9.817	1.53885	9.817	0.8897
9.82517	0.10285	9.82533	0.26805	9.825	0.30615	9.82533	0.5291	9.82517	1.73145	9.82533	1.52675	9.82533	0.891
9.8335	0.101	9.83367	0.26545	9.83333	0.3051	9.83367	0.52825	9.8335	1.72435	9.83367	1.512	9.83367	0.88885
9.84183	0.10095	9.842	0.2658	9.84167	0.3054	9.842	0.5288	9.84183	1.7201	9.842	1.4988	9.842	0.88925
9.85017	0.10015	9.85033	0.26335	9.85	0.3041	9.85033	0.52645	9.85017	1.71465	9.85033	1.4854	9.85033	0.88885
9.8585	0.10175	9.85867	0.26405	9.85833	0.30525	9.85867	0.52385	9.8585	1.712	9.85867	1.46835	9.85867	0.8908
9.86683	0.1009	9.867	0.26435	9.86667	0.30615	9.867	0.5221	9.86683	1.7061	9.867	1.4554	9.867	0.8905
9.87517	0.101	9.87533	0.2628	9.875	0.3075	9.87533	0.518	9.87517	1.70215	9.87533	1.4422	9.87533	0.887
9.8835	0.10275	9.88367	0.26265	9.88333	0.30875	9.88367	0.51585	9.8835	1.6983	9.88367	1.43095	9.88367	0.8865
9.89183	0.10145	9.892	0.2606	9.89167	0.3088	9.892	0.5117	9.89183	1.6941	9.892	1.42085	9.892	0.8822
9.90017	0.10075	9.90033	0.25935	9.9	0.30645	9.90033	0.5068	9.90017	1.68685	9.90033	1.4111	9.90033	0.8773
9.9085	0.1019	9.90867	0.25945	9.90833	0.3085	9.90867	0.501	9.9085	1.6844	9.90867	1.40095	9.90867	0.87485
9.91683	0.103	9.917	0.259	9.91667	0.30935	9.917	0.49945	9.91683	1.67895	9.917	1.39345	9.917	0.86925
9.92517	0.10435	9.92533	0.25995	9.925	0.3085	9.92533	0.49675	9.92517	1.67555	9.92533	1.38755	9.92533	0.8664
9.9335	0.10255	9.93367	0.2595	9.93333	0.30695	9.93367	0.4927	9.9335	1.66985	9.93367	1.37835	9.93367	0.86185
9.94183	0.10375	9.942	0.2581	9.94167	0.30575	9.942	0.4898	9.94183	1.6653	9.942	1.3708	9.942	0.8573
9.95017	0.10675	9.95033	0.2575	9.95	0.30545	9.95033	0.48755	9.95017	1.6616	9.95033	1.36425	9.95033	0.85545
9.9585	0.105	9.95867	0.25695	9.95833	0.30455	9.95867	0.48685	9.9585	1.65625	9.95867	1.3582	9.95867	0.8515
9.96683	0.10615	9.967	0.2567	9.96667	0.30195	9.967	0.4835	9.96683	1.6515	9.967	1.35045	9.967	0.8508
9.97517	0.10825	9.97533	0.25625	9.975	0.301	9.97533	0.48255	9.97517	1.6474	9.97533	1.34435	9.97533	0.85455
9.9835	0.10875	9.98367	0.25625	9.98333	0.30115	9.98367	0.48025	9.9835	1.64385	9.98367	1.33775	9.98367	0.8577
9.99183	0.10745	9.992	0.2556	9.99167	0.29825	9.992	0.4812	9.99183	1.639	9.992	1.3314	9.992	0.8649
10.0002	0.10805	10.0003	0.25475	10	0.29655	10.0003	0.4806	10.0002	1.6356	10.0003	1.32375	10.0003	0.8745
10.0085	0.10815	10.0087	0.25565	10.0083	0.29535	10.0087	0.4759	10.0085	1.6324	10.0087	1.31945	10.0087	0.8893
10.0168	0.10815	10.017	0.2553	10.0167	0.2944	10.017	0.4757	10.0168	1.6276	10.017	1.3132	10.017	0.9035
10.0252	0.1066	10.0253	0.2543	10.025	0.2948	10.0253	0.4741	10.0252	1.6249	10.0253	1.30745	10.0253	0.9224
10.0335	0.1068	10.0337	0.2549	10.0333	0.2951	10.0337	0.4726	10.0335	1.6209	10.0337	1.30145	10.0337	0.94195
10.0418	0.1073	10.042	0.2553	10.0417	0.296	10.042	0.47025	10.0418	1.62025	10.042	1.2947	10.042	0.96285
10.0502	0.10645	10.0503	0.2557	10.05	0.29665	10.0503	0.4697	10.0502	1.61835	10.0503	1.28815	10.0503	0.98045
10.0585	0.10715	10.0587	0.2567	10.0583	0.29835	10.0587	0.4669	10.0585	1.6152	10.0587	1.28275	10.0587	0.9949
10.0668	0.10575	10.067	0.25585	10.0667	0.2987	10.067	0.46175	10.0668	1.6133	10.067	1.27745	10.067	1.00455
10.0752	0.1066	10.0753	0.25675	10.075	0.30185	10.0753	0.45985	10.0752	1.61305	10.0753	1.2726	10.0753	1.01005
10.0835	0.1053	10.0837	0.25825	10.0833	0.30185	10.0837	0.4581	10.0835	1.6099	10.0837	1.267	10.0837	1.00885
10.0918	0.1034	10.092	0.25735	10.0917	0.3005	10.092	0.45235	10.0918	1.6055	10.092	1.2605	10.092	1.0008
10.1002	0.10565	10.1003	0.25825	10.1	0.30145	10.1003	0.4514	10.1002	1.604	10.1003	1.25615	10.1003	0.9916
10.1085	0.10575	10.1087	0.25845	10.1083	0.3025	10.1087	0.44925	10.1085	1.6025	10.1087	1.2504	10.1087	0.9763
10.1168	0.10575	10.117	0.2572	10.1167	0.30065	10.117	0.44965	10.1168	1.59915	10.117	1.2486	10.117	0.9582
10.1252	0.10665	10.1253	0.25835	10.125	0.3008	10.1253	0.44605	10.1252	1.59715	10.1253	1.24295	10.1253	0.94075
10.1335	0.10895	10.1337	0.2596	10.1333	0.30145	10.1337	0.44495	10.1335	1.5948	10.1337	1.239	10.1337	0.92215
10.1418	0.1085	10.142	0.25835	10.1417	0.29785	10.142	0.4437	10.1418	1.58985	10.142	1.2332	10.142	0.9004
10.1502	0.1068	10.1503	0.2589	10.15	0.2983	10.1503	0.44075	10.1502	1.5873	10.1503	1.22855	10.1503	0.8824
10.1585	0.10875	10.1587	0.2582	10.1583	0.29685	10.1587	0.4402	10.1585	1.58515	10.1587	1.22725	10.1587	0.8681
10.1668	0.11125	10.167	0.25885	10.1667	0.2961	10.167	0.44055	10.1668	1.5827	10.167	1.22525	10.167	0.85635
10.1752	0.10995	10.1753	0.25775	10.175	0.2934	10.1753	0.439	10.1752	1.5783	10.1753	1.22015	10.1753	0.84275
10.1835	0.11005	10.1837	0.25695	10.1833	0.29175	10.1837	0.4389	10.1835	1.5737	10.1837	1.21625	10.1837	0.83155
10.1918	0.11135	10.192	0.25475	10.1917	0.29025	10.192	0.43685	10.1918	1.5708	10.192	1.2176	10.192	0.8237
10.2002	0.11275	10.2003	0.25695	10.2	0.28905	10.2003	0.43415	10.2002	1.56625	10.2003	1.212	10.2003	0.8177
10.2085	0.11175	10.2087	0.2545	10.2083	0.2865	10.2087	0.4323	10.2085	1.5608	10.2087	1.2085	10.2087	0.81115
10.2168	0.11105	10.217	0.25445	10.2167	0.2858	10.217	0.43095	10.2168	1.55645	10.217	1.2059	10.217	0.807
10.2252	0.10915	10.2253	0.2528	10.225	0.282	10.2253	0.42975	10.2252	1.55055	10.2253	1.2026	10.2253	0.80115
10.2335	0.1096	10.2337	0.2523	10.2333	0.28235	10.2337	0.4287	10.2335	1.54675	10.2337	1.1993	10.2337	0.7983
10.2418	0.1089	10.242	0.2507	10.2417	0.28245	10.242	0.4291	10.2418	1.54055	10.242	1.19715	10.242	0.7949
10.2502	0.10875	10.2503	0.2494	10.25	0.28235	10.2503	0.42645	10.2502	1.53705	10.2503	1.19305	10.2503	0.79215
10.2585	0.10895	10.2587	0.2496	10.2583	0.2841	10.2587	0.4257	10.2585	1.53185	10.2587	1.19185	10.2587	0.79
10.2668	0.10775	10.267	0.24655	10.2667	0.28735	10.267	0.42305	10.2668	1.52585	10.267	1.18655	10.267	0.78635
10.2752	0.10685	10.2753	0.24435	10.275	0.28975	10.2753	0.4229	10.2752	1.52015	10.2753	1.1844	10.2753	0.781
10.2835	0.10535	10.2837	0.24405	10.2833	0.2951	10.2837	0.42085	10.2835	1.51345	10.2837	1.1809	10.2837	0.77985
10.2918	0.1067	10.292	0.2439	10.2917	0.3046	10.292	0.4216	10.2918	1.50875	10.292	1.1784	10.292	0.7769
10.3002	0.10465	10.3003	0.24145	10.3	0.315	10.3003	0.4212	10.3002	1.50125	10.3003	1.17575	10.3003	0.7725
10.3085	0.10455	10.3087	0.23975	10.3083	0.32915	10.3087	0.41775	10.3085	1.496	10.3087	1.16915	10.3087	0.7706
10.3168	0.10445	10.317	0.2371	10.3167	0.3534	10.317	0.4194	10.3168	1.4906	10.317	1.16655	10.317	0.76875
10.3252	0.1041	10.3253	0.2372	10.325	0.3935	10.3253	0.4187	10.3252	1.4864	10.3253	1.1618	10.3253	0.7667
10.3335	0.10345	10.3337	0.23455	10.3333	0.45445	10.3337	0.41685	10.3335	1.4795	10.3337	1.1576	10.3337	0.7636
10.3418	0.1035	10.342	0.23475	10.3417	0.52265	10.342	0.41725	10.3418	1.4755	10.342	1.15525	10.342	0.76445
10.3502	0.10255	10.3503	0.23375	10.35	0.55495	10.3503	0.41775	10.3502	1.46995	10.3503	1.15105	10.3503	0.76545
10.3585	0.103	10.3587	0.23265	10.3583	0.55635	10.3587	0.41705	10.3585	1.46555	10.3587	1.1487	10.3587	0.7782
10.3668	0.10335	10.367	0.232	10.3667	0.54045	10.367	0.41535	10.3668	1.46215	10.367	1.14725	10.367	0.8141
10.3752	0.10285	10.3753	0.2309	10.375	0.5174	10.3753	0.4178	10.3752	1.457	10.3753	1.14495	10.3753	0.8849
10.3835	0.1051	10.3837	0.23065	10.3833	0.49985	10.3837	0.414	10.3835	1.45585	10.3837	1.13975	10.3837	0.95805
10.3918	0.1064	10.392	0.22945	10.3917	0.4845	10.392	0.4139	10.3918	1.45385	10.392	1.1398	10.392	0.991
10.4002	0.1068	10.4003	0.22925	10.4	0.4617	10.4003	0.41335	10.4002	1.4546	10.4003	1.13675	10.4003	0.9921
10.4085	0.11045	10.4087	0.22815	10.4083	0.42125	10.4087	0.4103	10.4085	1.45905	10.4087	1.13335	10.4087	0.97705
10.4168	0.11775	10.417	0.22605	10.4167	0.37665	10.417	0.40895	10.4168	1.46955	10.417	1.1316	10.417	0.96055
10.4252	0.13315	10.4253	0.22625	10.425	0.3233	10.4253	0.4078	10.4252	1.4991	10.4253	1.1281	10.4253	0.95615
10.4335	0.14785	10.4337	0.226	10.4333	0.44505	10.4337	0.4063	10.4335	1.55325	10.4337	1.1217	10.4337	0.9569
10.4418	0.1535	10.442	0.2263	10.4417	0.96645	10.442	0.40695	10.4418	1.61255	10.442	1.11905	10.442	0.94275
10.4502	0.1514	10.4503	0.2248	10.45	1.6375	10.4503	0.40445	10.4502	1.6359	10.4503	1.11445	10.4503	0.90895
10.4585	0.1425	10.4587	0.22615	10.4583	2.2183	10.4587	0.40365	10.4585	1.6303	10.4587	1.1112	10.4587	0.85155
10.4668	0.1313	10.467	0.22455	10.4667	2.6596	10.467	0.40245	10.4668	1.60935	10.467	1.1047	10.467	0.8589
10.4752	0.1234	10.4753	0.2262	10.475	2.9867	10.4753	0.3993	10.4752	1.59155	10.4753	1.1	10.4753	1.27525
10.4835	0.11725	10.4837	0.2268	10.4833	3.238	10.4837	0.39865	10.4835	1.5801	10.4837	1.09565	10.4837	1.9911
10.4918	0.1093	10.492	0.2264	10.4917	3.4611	10.492	0.39685	10.4918	1.57555	10.492	1.0888	10.492	2.66615
10.5002	0.0961	10.5003	0.2255	10.5	3.6694	10.5003	0.3939	10.5002	1.56215	10.5003	1.0823	10.5003	3.1932
10.5085	0.0784	10.5087	0.2263	10.5083	3.83945	10.5087	0.392	10.5085	1.5374	10.5087	1.07725	10.5087	3.58195
10.5168	0.0376	10.517	0.228	10.5167	3.95765	10.517	0.3912	10.5168	1.5162	10.517	1.0739	10.517	3.86765
10.5252	0.1169	10.5253	0.2297	10.525	4.0355	10.5253	0.38795	10.5252	1.5014	10.5253	1.0672	10.5253	4.10595
10.5335	0.58675	10.5337	0.2322	10.5333	4.0862	10.5337	0.3861	10.5335	1.50115	10.5337	1.0637	10.5337	4.33155
10.5418	1.24155	10.542	0.2372	10.5417	4.122	10.542	0.3841	10.5418	1.7646	10.542	1.059	10.542	4.5259
10.5502	1.8322	10.5503	0.2466	10.55	4.14745	10.5503	0.3855	10.5502	2.4302	10.5503	1.05695	10.5503	4.6693
10.5585	2.298	10.5587	0.25805	10.5583	4.1672	10.5587	0.38235	10.5585	3.1552	10.5587	1.05455	10.5587	4.76395
10.5668	2.64885	10.567	0.2651	10.5667	4.18	10.567	0.3785	10.5668	3.73625	10.567	1.04925	10.567	4.82775
10.5752	2.91605	10.5753	0.26025	10.575	4.19	10.5753	0.3764	10.5752	4.1581	10.5753	1.0469	10.5753	4.87055
10.5835	3.14315	10.5837	0.25105	10.5833	4.1971	10.5837	0.3743	10.5835	4.46115	10.5837	1.0456	10.5837	4.9008
10.5918	3.36335	10.592	0.2383	10.5917	4.20215	10.592	0.37255	10.5918	4.6952	10.592	1.04185	10.592	4.9235
10.6002	3.55965	10.6003	0.2302	10.6	4.2052	10.6003	0.3709	10.6002	4.9027	10.6003	1.04215	10.6003	4.9406
10.6085	3.70725	10.6087	0.2211	10.6083	4.20635	10.6087	0.36765	10.6085	5.0821	10.6087	1.0403	10.6087	4.95215
10.6168	3.8077	10.617	0.21035	10.6167	4.20525	10.617	0.3671	10.6168	5.2159	10.617	1.03945	10.617	4.96055
10.6252	3.87545	10.6253	0.19965	10.625	4.2027	10.6253	0.36485	10.6252	5.30345	10.6253	1.04485	10.6253	4.9649
10.6335	3.92275	10.6337	0.1896	10.6333	4.20195	10.6337	0.36005	10.6335	5.35955	10.6337	1.05325	10.6337	4.9694
10.6418	3.9578	10.642	0.1825	10.6417	4.19865	10.642	0.3598	10.6418	5.39555	10.642	1.07325	10.642	4.9721
10.6502	3.98115	10.6503	0.1766	10.65	4.19345	10.6503	0.3549	10.6502	5.41685	10.6503	1.1043	10.6503	4.9699
10.6585	3.9999	10.6587	0.1734	10.6583	4.18995	10.6587	0.3528	10.6585	5.43205	10.6587	1.1444	10.6587	4.9682
10.6668	4.01525	10.667	0.17085	10.6667	4.18565	10.667	0.35405	10.6668	5.4425	10.667	1.1715	10.667	4.96565
10.6752	4.02515	10.6753	0.15965	10.675	4.18275	10.6753	0.3535	10.6752	5.4498	10.6753	1.16645	10.6753	4.96205
10.6835	4.0335	10.6837	0.1686	10.6833	4.179	10.6837	0.35375	10.6835	5.4547	10.6837	1.1441	10.6837	4.9594
10.6918	4.03875	10.692	0.35085	10.6917	4.17455	10.692	0.34935	10.6918	5.4559	10.692	1.1203	10.692	4.9567
10.7002	4.04515	10.7003	0.8453	10.7	4.17515	10.7003	0.34775	10.7002	5.4575	10.7003	1.0996	10.7003	4.95365
10.7085	4.04585	10.7087	1.4539	10.7083	4.1709	10.7087	0.34865	10.7085	5.4562	10.7087	1.0803	10.7087	4.9511
10.7168	4.0464	10.717	1.97495	10.7167	4.1678	10.717	0.3472	10.7168	5.45275	10.717	1.04625	10.717	4.94925
10.7252	4.0448	10.7253	2.3605	10.725	4.1625	10.7253	0.3485	10.7252	5.4482	10.7253	1.007	10.7253	4.946
10.7335	4.045	10.7337	2.64955	10.7333	4.16275	10.7337	0.34895	10.7335	5.4445	10.7337	0.96985	10.7337	4.94705
10.7418	4.0421	10.742	2.8975	10.7417	4.1588	10.742	0.3485	10.7418	5.4383	10.742	0.95055	10.742	4.94505
10.7502	4.039	10.7503	3.11385	10.75	4.154	10.7503	0.35165	10.7502	5.43065	10.7503	0.9623	10.7503	4.94565
10.7585	4.03695	10.7587	3.28275	10.7583	4.1478	10.7587	0.35205	10.7585	5.42385	10.7587	1.0124	10.7587	4.9447
10.7668	4.03315	10.767	3.3989	10.7667	4.1415	10.767	0.35205	10.7668	5.41455	10.767	1.21965	10.767	4.9393
10.7752	4.03145	10.7753	3.47595	10.775	4.13525	10.7753	0.35925	10.7752	5.4088	10.7753	2.00305	10.7753	4.9363
10.7835	4.0297	10.7837	3.5273	10.7833	4.12675	10.7837	0.3656	10.7835	5.4031	10.7837	3.0511	10.7837	4.9334
10.7918	4.0271	10.792	3.5589	10.7917	4.11805	10.792	0.37865	10.7918	5.3963	10.792	3.91015	10.792	4.92695
10.8002	4.0259	10.8003	3.5827	10.8	4.1094	10.8003	0.3944	10.8002	5.389	10.8003	4.52695	10.8003	4.9203
10.8085	4.025	10.8087	3.6	10.8083	4.10045	10.8087	0.4084	10.8085	5.38425	10.8087	4.97755	10.8087	4.9157
10.8168	4.0228	10.817	3.6079	10.8167	4.09085	10.817	0.4091	10.8168	5.37835	10.817	5.3235	10.817	4.90895
10.8252	4.02235	10.8253	3.61435	10.825	4.0822	10.8253	0.39955	10.8252	5.3715	10.8253	5.5988	10.8253	4.90075
10.8335	4.0178	10.8337	3.6156	10.8333	4.071	10.8337	0.38545	10.8335	5.364	10.8337	5.7953	10.8337	4.8895
10.8418	4.0129	10.842	3.61525	10.8417	4.0598	10.842	0.3723	10.8418	5.3575	10.842	5.9225	10.842	4.8805
10.8502	4.01005	10.8503	3.61585	10.85	4.04855	10.8503	0.3592	10.8502	5.352	10.8503	5.99905	10.8503	4.8713
10.8585	4.0049	10.8587	3.61105	10.8583	4.0379	10.8587	0.3428	10.8585	5.34445	10.8587	6.0503	10.8587	4.8593
10.8668	3.9985	10.867	3.60515	10.8667	4.02575	10.867	0.3226	10.8668	5.33275	10.867	6.08385	10.867	4.84595
10.8752	3.99275	10.8753	3.59885	10.875	4.0156	10.8753	0.29945	10.8752	5.3234	10.8753	6.107	10.8753	4.8354
10.8835	3.98615	10.8837	3.59155	10.8833	4.00385	10.8837	0.28565	10.8835	5.31405	10.8837	6.12685	10.8837	4.8232
10.8918	3.97885	10.892	3.58265	10.8917	3.9935	10.892	0.2724	10.8918	5.3023	10.892	6.13975	10.892	4.8094
10.9002	3.96915	10.9003	3.5748	10.9	3.98135	10.9003	0.265	10.9002	5.29105	10.9003	6.151	10.9003	4.79625
10.9085	3.9602	10.9087	3.56515	10.9083	3.97045	10.9087	0.2625	10.9085	5.2776	10.9087	6.1569	10.9087	4.78305
10.9168	3.9523	10.917	3.55715	10.9167	3.96005	10.917	0.2631	10.9168	5.26565	10.917	6.16115	10.917	4.77075
10.9252	3.94195	10.9253	3.5493	10.925	3.94935	10.9253	0.2437	10.9252	5.2528	10.9253	6.1626	10.9253	4.75795
10.9335	3.9315	10.9337	3.54115	10.9333	3.93545	10.9337	0.4213	10.9335	5.23795	10.9337	6.1627	10.9337	4.7426
10.9418	3.91915	10.942	3.53405	10.9417	3.9245	10.942	1.1303	10.9418	5.22375	10.942	6.16065	10.942	4.72845
10.9502	3.91055	10.9503	3.53085	10.95	3.9138	10.9503	2.0197	10.9502	5.21075	10.9503	6.16075	10.9503	4.71485
10.9585	3.89835	10.9587	3.52365	10.9583	3.9023	10.9587	2.7695	10.9585	5.19635	10.9587	6.1576	10.9587	4.7019
10.9668	3.88585	10.967	3.5192	10.9667	3.8911	10.967	3.33545	10.9668	5.1823	10.967	6.15525	10.967	4.6894
10.9752	3.8741	10.9753	3.51405	10.975	3.87695	10.9753	3.7586	10.9752	5.16715	10.9753	6.1526	10.9753	4.6742
10.9835	3.86305	10.9837	3.5098	10.9833	3.86595	10.9837	4.10925	10.9835	5.15325	10.9837	6.14945	10.9837	4.6604
10.9918	3.8513	10.992	3.5041	10.9917	3.85265	10.992	4.4114	10.9918	5.13895	10.992	6.1444	10.992	4.64645
11.0002	3.8389	11.0003	3.50005	11	3.84255	11.0003	4.6521	11.0002	5.12535	11.0003	6.1434	11.0003	4.6346
11.0085	3.82915	11.0087	3.4942	11.0083	3.83145	11.0087	4.823	11.0085	5.1127	11.0087	6.13815	11.0087	4.6225
11.0168	3.8175	11.017	3.4903	11.0167	3.81905	11.017	4.93915	11.0168	5.0969	11.017	6.1334	11.017	4.6098
11.0252	3.8065	11.0253	3.48325	11.025	3.8054	11.0253	5.01515	11.0252	5.08125	11.0253	6.12945	11.0253	4.59605
11.0335	3.7955	11.0337	3.47835	11.0333	3.794	11.0337	5.0641	11.0335	5.0677	11.0337	6.12285	11.0337	4.5844
11.0418	3.7844	11.042	3.4696	11.0417	3.7805	11.042	5.1032	11.0418	5.0527	11.042	6.1176	11.042	4.5718
11.0502	3.77265	11.0503	3.4639	11.05	3.7673	11.0503	5.1295	11.0502	5.0371	11.0503	6.1098	11.0503	4.5578
11.0585	3.76355	11.0587	3.45565	11.0583	3.75575	11.0587	5.1462	11.0585	5.02375	11.0587	6.0998	11.0587	4.54625
11.0668	3.7518	11.067	3.4462	11.0667	3.74075	11.067	5.15985	11.0668	5.0073	11.067	6.0904	11.067	4.5328
11.0752	3.74035	11.0753	3.43655	11.075	3.7285	11.0753	5.16845	11.0752	4.9931	11.0753	6.08265	11.0753	4.52015
11.0835	3.73115	11.0837	3.42785	11.0833	3.71645	11.0837	5.1734	11.0835	4.98025	11.0837	6.0726	11.0837	4.50745
11.0918	3.7196	11.092	3.41795	11.0917	3.70345	11.092	5.1771	11.0918	4.9655	11.092	6.0614	11.092	4.49545
11.1002	3.7091	11.1003	3.4068	11.1	3.6889	11.1003	5.17735	11.1002	4.9486	11.1003	6.0494	11.1003	4.48225
11.1085	3.70005	11.1087	3.3957	11.1083	3.676	11.1087	5.1758	11.1085	4.9345	11.1087	6.0364	11.1087	4.47005
11.1168	3.6887	11.117	3.3852	11.1167	3.66145	11.117	5.1746	11.1168	4.92055	11.117	6.0241	11.117	4.4562
11.1252	3.6755	11.1253	3.37235	11.125	3.64795	11.1253	5.1742	11.1252	4.9049	11.1253	6.01225	11.1253	4.44435
11.1335	3.6655	11.1337	3.3604	11.1333	3.6322	11.1337	5.16795	11.1335	4.8904	11.1337	5.9998	11.1337	4.4297
11.1418	3.6567	11.142	3.3501	11.1417	3.6195	11.142	5.1665	11.1418	4.87625	11.142	5.9901	11.142	4.41705
11.1502	3.6448	11.1503	3.3343	11.15	3.6049	11.1503	5.16185	11.1502	4.8598	11.1503	5.97665	11.1503	4.4026
11.1585	3.63045	11.1587	3.3206	11.1583	3.58765	11.1587	5.1597	11.1585	4.845	11.1587	5.9689	11.1587	4.38685
11.1668	3.61805	11.167	3.30455	11.1667	3.5726	11.167	5.1547	11.1668	4.82765	11.167	5.95995	11.167	4.37165
11.1752	3.6062	11.1753	3.29085	11.175	3.55785	11.1753	5.15265	11.1752	4.81135	11.1753	5.95275	11.1753	4.3579
11.1835	3.59445	11.1837	3.2772	11.1833	3.54245	11.1837	5.14815	11.1835	4.7964	11.1837	5.94865	11.1837	4.34145
11.1918	3.5833	11.192	3.26265	11.1917	3.52905	11.192	5.145	11.1918	4.782	11.192	5.9485	11.192	4.3272
11.2002	3.57	11.2003	3.24645	11.2	3.51245	11.2003	5.13845	11.2002	4.76475	11.2003	5.94645	11.2003	4.31225
11.2085	3.55825	11.2087	3.2309	11.2083	3.49755	11.2087	5.13155	11.2085	4.74845	11.2087	5.94955	11.2087	4.2979
11.2168	3.5433	11.217	3.2118	11.2167	3.481	11.217	5.1262	11.2168	4.73185	11.217	5.9558	11.217	4.2795
11.2252	3.5324	11.2253	3.1973	11.225	3.4661	11.2253	5.1187	11.2252	4.7152	11.2253	5.96155	11.2253	4.26495
11.2335	3.51875	11.2337	3.1809	11.2333	3.4495	11.2337	5.1138	11.2335	4.69845	11.2337	5.9717	11.2337	4.24985
11.2418	3.50465	11.242	3.1635	11.2417	3.4342	11.242	5.1059	11.2418	4.68145	11.242	5.98145	11.242	4.233
11.2502	3.4905	11.2503	3.14595	11.25	3.4202	11.2503	5.09595	11.2502	4.66555	11.2503	5.98875	11.2503	4.2166
11.2585	3.47915	11.2587	3.12765	11.2583	3.4039	11.2587	5.0883	11.2585	4.64855	11.2587	5.998	11.2587	4.20125
11.2668	3.4635	11.267	3.10755	11.2667	3.3879	11.267	5.08	11.2668	4.6309	11.267	6.00845	11.267	4.18245
11.2752	3.4476	11.2753	3.0882	11.275	3.37095	11.2753	5.06975	11.2752	4.61395	11.2753	6.0167	11.2753	4.16365
11.2835	3.4333	11.2837	3.0696	11.2833	3.356	11.2837	5.05845	11.2835	4.59665	11.2837	6.01825	11.2837	4.1507
11.2918	3.417	11.292	3.04695	11.2917	3.3391	11.292	5.05105	11.2918	4.579	11.292	6.0204	11.292	4.13125
11.3002	3.405	11.3003	3.0293	11.3	3.3253	11.3003	5.04045	11.3002	4.5635	11.3003	6.01705	11.3003	4.1168
11.3085	3.3899	11.3087	3.0094	11.3083	3.31035	11.3087	5.0315	11.3085	4.54635	11.3087	6.00875	11.3087	4.09935
11.3168	3.374	11.317	2.98725	11.3167	3.291	11.317	5.0189	11.3168	4.5288	11.317	5.99685	11.317	4.0813
11.3252	3.36005	11.3253	2.96695	11.325	3.27545	11.3253	5.00495	11.3252	4.5117	11.3253	5.97705	11.3253	4.0645
11.3335	3.3425	11.3337	2.94475	11.3333	3.25905	11.3337	4.99115	11.3335	4.4927	11.3337	5.9548	11.3337	4.0457
11.3418	3.32655	11.342	2.92325	11.3417	3.24015	11.342	4.98005	11.3418	4.4746	11.342	5.92755	11.342	4.028
11.3502	3.31145	11.3503	2.901	11.35	3.2211	11.3503	4.96515	11.3502	4.4573	11.3503	5.8944	11.3503	4.0115
11.3585	3.29435	11.3587	2.8776	11.3583	3.20335	11.3587	4.95265	11.3585	4.43825	11.3587	5.85855	11.3587	3.99155
11.3668	3.27975	11.367	2.85565	11.3667	3.1861	11.367	4.9406	11.3668	4.4222	11.367	5.8221	11.367	3.9746
11.3752	3.26355	11.3753	2.8352	11.375	3.16495	11.3753	4.92405	11.3752	4.40445	11.3753	5.7811	11.3753	3.956
11.3835	3.2487	11.3837	2.81155	11.3833	3.14325	11.3837	4.9096	11.3835	4.3878	11.3837	5.7401	11.3837	3.939
11.3918	3.23325	11.392	2.7891	11.3917	3.1236	11.392	4.8979	11.3918	4.36945	11.392	5.69805	11.392	3.9197
11.4002	3.2179	11.4003	2.76595	11.4	3.0976	11.4003	4.88625	11.4002	4.351	11.4003	5.6573	11.4003	3.9
11.4085	3.2023	11.4087	2.74335	11.4083	3.0748	11.4087	4.87005	11.4085	4.3318	11.4087	5.61015	11.4087	3.88135
11.4168	3.18625	11.417	2.71995	11.4167	3.0513	11.417	4.8579	11.4168	4.31345	11.417	5.56835	11.417	3.86185
11.4252	3.1706	11.4253	2.69715	11.425	3.0253	11.4253	4.8444	11.4252	4.2927	11.4253	5.5257	11.4253	3.8402
11.4335	3.15455	11.4337	2.67315	11.4333	2.9986	11.4337	4.8325	11.4335	4.2733	11.4337	5.48305	11.4337	3.81965
11.4418	3.13885	11.442	2.65065	11.4417	2.9721	11.442	4.8228	11.4418	4.2526	11.442	5.44445	11.442	3.79925
11.4502	3.12165	11.4503	2.6259	11.45	2.9439	11.4503	4.8128	11.4502	4.22925	11.4503	5.40515	11.4503	3.775
11.4585	3.1033	11.4587	2.60275	11.4583	2.91365	11.4587	4.80405	11.4585	4.20835	11.4587	5.3693	11.4587	3.75025
11.4668	3.0841	11.467	2.57995	11.4667	2.88495	11.467	4.79955	11.4668	4.1861	11.467	5.33565	11.467	3.72685
11.4752	3.0672	11.4753	2.55675	11.475	2.85655	11.4753	4.7986	11.4752	4.16275	11.4753	5.3056	11.4753	3.70365
11.4835	3.0488	11.4837	2.53475	11.4833	2.8265	11.4837	4.7968	11.4835	4.13635	11.4837	5.27315	11.4837	3.67695
11.4918	3.02845	11.492	2.51065	11.4917	2.7971	11.492	4.79895	11.4918	4.1103	11.492	5.24645	11.492	3.64965
11.5002	3.00755	11.5003	2.48825	11.5	2.7665	11.5003	4.80215	11.5002	4.08465	11.5003	5.2199	11.5003	3.62105
11.5085	2.9862	11.5087	2.46505	11.5083	2.735	11.5087	4.8032	11.5085	4.05725	11.5087	5.1915	11.5087	3.59175
11.5168	2.96145	11.517	2.44325	11.5167	2.7038	11.517	4.81	11.5168	4.0286	11.517	5.1656	11.517	3.56205
11.5252	2.938	11.5253	2.41955	11.525	2.67345	11.5253	4.8195	11.5252	4.00005	11.5253	5.14075	11.5253	3.5322
11.5335	2.9134	11.5337	2.39655	11.5333	2.6416	11.5337	4.829	11.5335	3.96935	11.5337	5.11625	11.5337	3.5017
11.5418	2.8886	11.542	2.3703	11.5417	2.6112	11.542	4.84355	11.5418	3.94045	11.542	5.0953	11.542	3.4704
11.5502	2.8616	11.5503	2.3446	11.55	2.5778	11.5503	4.85445	11.5502	3.90545	11.5503	5.06965	11.5503	3.43685
11.5585	2.8361	11.5587	2.3196	11.5583	2.5486	11.5587	4.86655	11.5585	3.87725	11.5587	5.05015	11.5587	3.40645
11.5668	2.8071	11.567	2.2913	11.5667	2.5167	11.567	4.87935	11.5668	3.84325	11.567	5.0295	11.567	3.37325
11.5752	2.77795	11.5753	2.2629	11.575	2.4847	11.5753	4.88865	11.5752	3.80975	11.5753	5.009	11.5753	3.34185
11.5835	2.74995	11.5837	2.2334	11.5833	2.4523	11.5837	4.8956	11.5835	3.77815	11.5837	4.9859	11.5837	3.309
11.5918	2.7182	11.592	2.2032	11.5917	2.41995	11.592	4.9008	11.5918	3.743	11.592	4.96715	11.592	3.2742
11.6002	2.68915	11.6003	2.17135	11.6	2.3894	11.6003	4.90585	11.6002	3.7092	11.6003	4.9478	11.6003	3.2407
11.6085	2.66005	11.6087	2.1385	11.6083	2.357	11.6087	4.9039	11.6085	3.675	11.6087	4.929	11.6087	3.20735
11.6168	2.6298	11.617	2.1031	11.6167	2.3242	11.617	4.89805	11.6168	3.6412	11.617	4.9087	11.617	3.1736
11.6252	2.5989	11.6253	2.0717	11.625	2.2922	11.6253	4.8883	11.6252	3.60815	11.6253	4.89025	11.6253	3.14065
11.6335	2.56935	11.6337	2.036	11.6333	2.2604	11.6337	4.87595	11.6335	3.57505	11.6337	4.8718	11.6337	3.10935
11.6418	2.5382	11.642	1.9983	11.6417	2.22825	11.642	4.8566	11.6418	3.53875	11.642	4.85295	11.642	3.0719
11.6502	2.50435	11.6503	1.96035	11.65	2.1927	11.6503	4.8322	11.6502	3.50335	11.6503	4.8335	11.6503	3.03805
11.6585	2.47325	11.6587	1.92205	11.6583	2.16035	11.6587	4.8042	11.6585	3.4686	11.6587	4.8158	11.6587	3.0045
11.6668	2.4424	11.667	1.8851	11.6667	2.12735	11.667	4.7762	11.6668	3.4338	11.667	4.7999	11.667	2.97225
11.6752	2.40965	11.6753	1.84675	11.675	2.09295	11.6753	4.7424	11.6752	3.39725	11.6753	4.7829	11.6753	2.93605
11.6835	2.3774	11.6837	1.80825	11.6833	2.06185	11.6837	4.7063	11.6835	3.3613	11.6837	4.76505	11.6837	2.9013
11.6918	2.34415	11.692	1.76915	11.6917	2.02705	11.692	4.6651	11.6918	3.32595	11.692	4.74855	11.692	2.8661
11.7002	2.314	11.7003	1.7307	11.7	1.99465	11.7003	4.6239	11.7002	3.28995	11.7003	4.73245	11.7003	2.8333
11.7085	2.2807	11.7087	1.69225	11.7083	1.96075	11.7087	4.58025	11.7085	3.25245	11.7087	4.71235	11.7087	2.79625
11.7168	2.24735	11.717	1.6517	11.7167	1.9261	11.717	4.53785	11.7168	3.2146	11.717	4.69535	11.717	2.763
11.7252	2.21605	11.7253	1.614	11.725	1.8929	11.7253	4.49395	11.7252	3.17965	11.7253	4.67845	11.7253	2.7285
11.7335	2.1826	11.7337	1.57495	11.7333	1.8567	11.7337	4.4509	11.7335	3.14195	11.7337	4.65965	11.7337	2.69165
11.7418	2.14905	11.742	1.5365	11.7417	1.8236	11.742	4.4092	11.7418	3.1037	11.742	4.6401	11.742	2.65565
11.7502	2.1174	11.7503	1.49895	11.75	1.78965	11.7503	4.36705	11.7502	3.0675	11.7503	4.62365	11.7503	2.6211
11.7585	2.0846	11.7587	1.4593	11.7583	1.7542	11.7587	4.32365	11.7585	3.02895	11.7587	4.6037	11.7587	2.5852
11.7668	2.05065	11.767	1.42065	11.7667	1.71985	11.767	4.28035	11.7668	2.9899	11.767	4.58285	11.767	2.5492
11.7752	2.0172	11.7753	1.384	11.775	1.68605	11.7753	4.2399	11.7752	2.95255	11.7753	4.55925	11.7753	2.51235
11.7835	1.98385	11.7837	1.3454	11.7833	1.6496	11.7837	4.2005	11.7835	2.91325	11.7837	4.5375	11.7837	2.47695
11.7918	1.95225	11.792	1.30915	11.7917	1.6169	11.792	4.16545	11.7918	2.87435	11.792	4.5156	11.792	2.44125
11.8002	1.91845	11.8003	1.27345	11.8	1.583	11.8003	4.12545	11.8002	2.8358	11.8003	4.49085	11.8003	2.4065
11.8085	1.88605	11.8087	1.2368	11.8083	1.5494	11.8087	4.0884	11.8085	2.79765	11.8087	4.4635	11.8087	2.37
11.8168	1.8509	11.817	1.20105	11.8167	1.5154	11.817	4.05115	11.8168	2.75865	11.817	4.4349	11.817	2.3345
11.8252	1.82	11.8253	1.16715	11.825	1.48185	11.8253	4.01715	11.8252	2.7206	11.8253	4.40745	11.8253	2.30005
11.8335	1.78485	11.8337	1.1309	11.8333	1.44755	11.8337	3.979	11.8335	2.6821	11.8337	4.37695	11.8337	2.2609
11.8418	1.75225	11.842	1.09715	11.8417	1.41535	11.842	3.9432	11.8418	2.64405	11.842	4.34865	11.842	2.226
11.8502	1.7199	11.8503	1.0654	11.85	1.3831	11.8503	3.909	11.8502	2.60635	11.8503	4.31965	11.8503	2.19115
11.8585	1.6861	11.8587	1.03095	11.8583	1.3494	11.8587	3.8813	11.8585	2.56765	11.8587	4.28945	11.8587	2.1541
11.8668	1.6523	11.867	0.99615	11.8667	1.31645	11.867	3.84845	11.8668	2.52905	11.867	4.25685	11.867	2.11895
11.8752	1.6193	11.8753	0.96295	11.875	1.28305	11.8753	3.813	11.8752	2.48835	11.8753	4.22395	11.8753	2.0824
11.8835	1.58495	11.8837	0.93245	11.8833	1.25275	11.8837	3.77915	11.8835	2.45255	11.8837	4.19175	11.8837	2.04635
11.8918	1.55035	11.892	0.9013	11.8917	1.22035	11.892	3.74455	11.8918	2.4148	11.892	4.1574	11.892	2.0105
11.9002	1.5152	11.9003	0.8712	11.9	1.18915	11.9003	3.7092	11.9002	2.3754	11.9003	4.1242	11.9003	1.97495
11.9085	1.48125	11.9087	0.8426	11.9083	1.15865	11.9087	3.6752	11.9085	2.3392	11.9087	4.0921	11.9087	1.9389
11.9168	1.44855	11.917	0.81405	11.9167	1.1286	11.917	3.6395	11.9168	2.30285	11.917	4.05635	11.917	1.90465
11.9252	1.4154	11.9253	0.78605	11.925	1.09875	11.9253	3.6045	11.9252	2.26525	11.9253	4.02085	11.9253	1.86915
11.9335	1.38235	11.9337	0.76185	11.9333	1.0717	11.9337	3.56695	11.9335	2.2304	11.9337	3.98615	11.9337	1.8356
11.9418	1.3488	11.942	0.7352	11.9417	1.0412	11.942	3.53315	11.9418	2.19415	11.942	3.952	11.942	1.80045
11.9502	1.3144	11.9503	0.70885	11.95	1.01385	11.9503	3.4943	11.9502	2.15675	11.9503	3.91445	11.9503	1.7659
11.9585	1.2838	11.9587	0.6858	11.9583	0.98765	11.9587	3.45825	11.9585	2.1222	11.9587	3.8794	11.9587	1.73365
11.9668	1.2485	11.967	0.6607	11.9667	0.9585	11.967	3.42135	11.9668	2.0854	11.967	3.8429	11.967	1.69965
11.9752	1.2176	11.9753	0.6417	11.975	0.9344	11.9753	3.38285	11.9752	2.05365	11.9753	3.80605	11.9753	1.6691
11.9835	1.18585	11.9837	0.6205	11.9833	0.9071	11.9837	3.3467	11.9835	2.0193	11.9837	3.76765	11.9837	1.63585
11.9918	1.1547	11.992	0.6017	11.9917	0.88245	11.992	3.3086	11.9918	1.98525	11.992	3.73015	11.992	1.6037
12.0002	1.1227	12.0003	0.5814	12	0.86015	12.0003	3.2688	12.0002	1.95345	12.0003	3.68985	12.0003	1.5726
12.0085	1.0901	12.0087	0.5637	12.0083	0.8348	12.0087	3.23	12.0085	1.92135	12.0087	3.6516	12.0087	1.54195
12.0168	1.05925	12.017	0.5465	12.0167	0.81255	12.017	3.19385	12.0168	1.89135	12.017	3.6126	12.017	1.5115
12.0252	1.0285	12.0253	0.53075	12.025	0.7907	12.0253	3.1553	12.0252	1.8612	12.0253	3.5724	12.0253	1.4812
12.0335	0.998	12.0337	0.51405	12.0333	0.7686	12.0337	3.11595	12.0335	1.83115	12.0337	3.53295	12.0337	1.4522
12.0418	0.9685	12.042	0.4999	12.0417	0.74775	12.042	3.0742	12.0418	1.8027	12.042	3.4909	12.042	1.4247
12.0502	0.93905	12.0503	0.4851	12.05	0.72995	12.0503	3.0351	12.0502	1.77475	12.0503	3.4493	12.0503	1.39725
12.0585	0.9109	12.0587	0.473	12.0583	0.7116	12.0587	2.99385	12.0585	1.748	12.0587	3.4078	12.0587	1.37075
12.0668	0.88235	12.067	0.45985	12.0667	0.69145	12.067	2.95175	12.0668	1.721	12.067	3.36375	12.067	1.3435
12.0752	0.8533	12.0753	0.44555	12.075	0.67365	12.0753	2.9063	12.0752	1.6938	12.0753	3.31835	12.0753	1.31585
12.0835	0.8277	12.0837	0.4365	12.0833	0.6584	12.0837	2.86365	12.0835	1.66975	12.0837	3.27485	12.0837	1.29225
12.0918	0.8022	12.092	0.42655	12.0917	0.64205	12.092	2.82025	12.0918	1.64495	12.092	3.22875	12.092	1.2685
12.1002	0.77745	12.1003	0.4158	12.1	0.6261	12.1003	2.7764	12.1002	1.622	12.1003	3.1831	12.1003	1.2447
12.1085	0.75005	12.1087	0.4047	12.1083	0.6102	12.1087	2.73275	12.1085	1.59735	12.1087	3.1363	12.1087	1.2199
12.1168	0.72565	12.117	0.3963	12.1167	0.59525	12.117	2.68755	12.1168	1.57485	12.117	3.08895	12.117	1.19575
12.1252	0.70205	12.1253	0.38825	12.125	0.5831	12.1253	2.6431	12.1252	1.55205	12.1253	3.04505	12.1253	1.17435
12.1335	0.6795	12.1337	0.37865	12.1333	0.56855	12.1337	2.598	12.1335	1.5304	12.1337	2.9991	12.1337	1.15165
12.1418	0.6576	12.142	0.3722	12.1417	0.5571	12.142	2.5531	12.1418	1.5115	12.142	2.95175	12.142	1.1335
12.1502	0.6363	12.1503	0.36545	12.15	0.54475	12.1503	2.5085	12.1502	1.4912	12.1503	2.907	12.1503	1.1132
12.1585	0.61475	12.1587	0.35715	12.1583	0.5313	12.1587	2.46555	12.1585	1.47015	12.1587	2.86145	12.1587	1.09355
12.1668	0.5955	12.167	0.34975	12.1667	0.52075	12.167	2.42535	12.1668	1.45205	12.167	2.81865	12.167	1.0752
12.1752	0.5773	12.1753	0.34535	12.175	0.51195	12.1753	2.38255	12.1752	1.43415	12.1753	2.77375	12.1753	1.05795
12.1835	0.5579	12.1837	0.33855	12.1833	0.49895	12.1837	2.34005	12.1835	1.41295	12.1837	2.7291	12.1837	1.03895
12.1918	0.54175	12.192	0.3337	12.1917	0.4893	12.192	2.3002	12.1918	1.39765	12.192	2.6861	12.192	1.0227
12.2002	0.525	12.2003	0.3288	12.2	0.4808	12.2003	2.25995	12.2002	1.3813	12.2003	2.64405	12.2003	1.0063
12.2085	0.50975	12.2087	0.32365	12.2083	0.47295	12.2087	2.22135	12.2085	1.36485	12.2087	2.60085	12.2087	0.9894
12.2168	0.4918	12.217	0.3173	12.2167	0.46245	12.217	2.17925	12.2168	1.34645	12.217	2.5569	12.217	0.974
12.2252	0.47745	12.2253	0.3132	12.225	0.4548	12.2253	2.14065	12.2252	1.33185	12.2253	2.5156	12.2253	0.96025
12.2335	0.46385	12.2337	0.3096	12.2333	0.44605	12.2337	2.1028	12.2335	1.3184	12.2337	2.47445	12.2337	0.9454
12.2418	0.4495	12.242	0.3038	12.2417	0.4394	12.242	2.06375	12.2418	1.3019	12.242	2.43255	12.242	0.93005
12.2502	0.43675	12.2503	0.29965	12.25	0.4315	12.2503	2.02525	12.2502	1.28845	12.2503	2.3888	12.2503	0.91685
12.2585	0.42525	12.2587	0.2971	12.2583	0.4265	12.2587	1.98365	12.2585	1.275	12.2587	2.3465	12.2587	0.90375
12.2668	0.4118	12.267	0.29375	12.2667	0.4202	12.267	1.94425	12.2668	1.26325	12.267	2.3039	12.267	0.89155
12.2752	0.40195	12.2753	0.28855	12.275	0.41425	12.2753	1.90465	12.2752	1.2477	12.2753	2.2624	12.2753	0.8791
12.2835	0.3905	12.2837	0.2841	12.2833	0.4065	12.2837	1.86535	12.2835	1.2359	12.2837	2.2186	12.2837	0.8664
12.2918	0.37885	12.292	0.28025	12.2917	0.39925	12.292	1.8236	12.2918	1.2236	12.292	2.17585	12.292	0.8533
12.3002	0.3696	12.3003	0.27765	12.3	0.39485	12.3003	1.7875	12.3002	1.21195	12.3003	2.1321	12.3003	0.8449
12.3085	0.36155	12.3087	0.27605	12.3083	0.38965	12.3087	1.744	12.3085	1.2008	12.3087	2.08785	12.3087	0.83465
12.3168	0.3509	12.317	0.27205	12.3167	0.3832	12.317	1.7018	12.3168	1.18925	12.317	2.0445	12.317	0.8229
12.3252	0.34275	12.3253	0.2712	12.325	0.37915	12.3253	1.65865	12.3252	1.1809	12.3253	2.00025	12.3253	0.81405
12.3335	0.33335	12.3337	0.2654	12.3333	0.37345	12.3337	1.61855	12.3335	1.16865	12.3337	1.9586	12.3337	0.80365
12.3418	0.32595	12.342	0.2627	12.3417	0.36855	12.342	1.5754	12.3418	1.158	12.342	1.91415	12.342	0.7969
12.3502	0.3182	12.3503	0.26065	12.35	0.3653	12.3503	1.5335	12.3502	1.149	12.3503	1.87	12.3503	0.7876
12.3585	0.31165	12.3587	0.25875	12.3583	0.3614	12.3587	1.4921	12.3585	1.14075	12.3587	1.82755	12.3587	0.7812
12.3668	0.3036	12.367	0.25665	12.3667	0.35625	12.367	1.4507	12.3668	1.13045	12.367	1.78595	12.367	0.7734
12.3752	0.2968	12.3753	0.25475	12.375	0.35275	12.3753	1.4097	12.3752	1.1217	12.3753	1.7432	12.3753	0.76675
12.3835	0.29155	12.3837	0.25155	12.3833	0.34895	12.3837	1.36935	12.3835	1.11425	12.3837	1.70085	12.3837	0.7603
12.3918	0.2851	12.392	0.2494	12.3917	0.34465	12.392	1.32835	12.3918	1.1051	12.392	1.65915	12.392	0.75165
12.4002	0.27795	12.4003	0.24655	12.4	0.34065	12.4003	1.28985	12.4002	1.0968	12.4003	1.6188	12.4003	0.7454
12.4085	0.27405	12.4087	0.24615	12.4083	0.33915	12.4087	1.25245	12.4085	1.09155	12.4087	1.57925	12.4087	0.74295
12.4168	0.26845	12.417	0.2448	12.4167	0.33605	12.417	1.2153	12.4168	1.0839	12.417	1.5428	12.417	0.73615
12.4252	0.26465	12.4253	0.2432	12.425	0.3326	12.4253	1.1767	12.4252	1.07555	12.4253	1.50305	12.4253	0.72945
12.4335	0.25925	12.4337	0.24055	12.4333	0.33	12.4337	1.14125	12.4335	1.0699	12.4337	1.4697	12.4337	0.7238
12.4418	0.25455	12.442	0.2403	12.4417	0.32765	12.442	1.1045	12.4418	1.06465	12.442	1.43305	12.442	0.7208
12.4502	0.25125	12.4503	0.2371	12.45	0.32575	12.4503	1.0696	12.4502	1.0563	12.4503	1.3999	12.4503	0.7152
12.4585	0.245	12.4587	0.23435	12.4583	0.3234	12.4587	1.03535	12.4585	1.05015	12.4587	1.3639	12.4587	0.7095
12.4668	0.2432	12.467	0.23355	12.4667	0.32115	12.467	1.0019	12.4668	1.04435	12.467	1.33105	12.467	0.70575
12.4752	0.238	12.4753	0.2321	12.475	0.31805	12.4753	0.96955	12.4752	1.03905	12.4753	1.29995	12.4753	0.70045
12.4835	0.2316	12.4837	0.2298	12.4833	0.3154	12.4837	0.9392	12.4835	1.0326	12.4837	1.26855	12.4837	0.6968
12.4918	0.2298	12.492	0.2272	12.4917	0.3136	12.492	0.9082	12.4918	1.02725	12.492	1.238	12.492	0.6913
12.5002	0.22755	12.5003	0.2271	12.5	0.3123	12.5003	0.87845	12.5002	1.02305	12.5003	1.20965	12.5003	0.68835
12.5085	0.2245	12.5087	0.2269	12.5083	0.31175	12.5087	0.8486	12.5085	1.01885	12.5087	1.18105	12.5087	0.68645
12.5168	0.2203	12.517	0.2227	12.5167	0.309	12.517	0.81855	12.5168	1.01235	12.517	1.15265	12.517	0.6821
12.5252	0.21685	12.5253	0.22275	12.525	0.30665	12.5253	0.7913	12.5252	1.0064	12.5253	1.12635	12.5253	0.6785
12.5335	0.21435	12.5337	0.22055	12.5333	0.30485	12.5337	0.7635	12.5335	1.0011	12.5337	1.10265	12.5337	0.67275
12.5418	0.2113	12.542	0.22035	12.5417	0.30435	12.542	0.74	12.5418	0.9976	12.542	1.0786	12.542	0.6707
12.5502	0.2096	12.5503	0.21845	12.55	0.3026	12.5503	0.71605	12.5502	0.9928	12.5503	1.05565	12.5503	0.66815
12.5585	0.20705	12.5587	0.21695	12.5583	0.3015	12.5587	0.6925	12.5585	0.9873	12.5587	1.03155	12.5587	0.6643
12.5668	0.20495	12.567	0.2167	12.5667	0.2998	12.567	0.6691	12.5668	0.9845	12.567	1.008	12.567	0.6625
12.5752	0.2028	12.5753	0.2152	12.575	0.29865	12.5753	0.6497	12.5752	0.97875	12.5753	0.9893	12.5753	0.6592
12.5835	0.19935	12.5837	0.2133	12.5833	0.2959	12.5837	0.62845	12.5835	0.97415	12.5837	0.96875	12.5837	0.6553
12.5918	0.1987	12.592	0.212	12.5917	0.2968	12.592	0.61145	12.5918	0.96985	12.592	0.9536	12.592	0.6526
12.6002	0.19465	12.6003	0.21025	12.6	0.29515	12.6003	0.59195	12.6002	0.96415	12.6003	0.93305	12.6003	0.6506
12.6085	0.193	12.6087	0.2096	12.6083	0.2937	12.6087	0.57665	12.6085	0.96045	12.6087	0.9164	12.6087	0.6475
12.6168	0.19215	12.617	0.2092	12.6167	0.29275	12.617	0.56095	12.6168	0.9571	12.617	0.9016	12.617	0.6447
12.6252	0.1898	12.6253	0.2065	12.625	0.2918	12.6253	0.545	12.6252	0.953	12.6253	0.88585	12.6253	0.64225
12.6335	0.1886	12.6337	0.20515	12.6333	0.2909	12.6337	0.53045	12.6335	0.95015	12.6337	0.87055	12.6337	0.6397
12.6418	0.1875	12.642	0.20655	12.6417	0.2892	12.642	0.5139	12.6418	0.94465	12.642	0.8551	12.642	0.6384
12.6502	0.18505	12.6503	0.2059	12.65	0.28845	12.6503	0.50325	12.6502	0.94085	12.6503	0.843	12.6503	0.6352
12.6585	0.1832	12.6587	0.20595	12.6583	0.28835	12.6587	0.4894	12.6585	0.9371	12.6587	0.82985	12.6587	0.63315
12.6668	0.18165	12.667	0.2049	12.6667	0.2874	12.667	0.47745	12.6668	0.93565	12.667	0.81675	12.667	0.6312
12.6752	0.1804	12.6753	0.20575	12.675	0.28765	12.6753	0.46635	12.6752	0.9321	12.6753	0.8023	12.6753	0.62935
12.6835	0.1783	12.6837	0.20415	12.6833	0.2862	12.6837	0.454	12.6835	0.9286	12.6837	0.791	12.6837	0.62705
12.6918	0.17765	12.692	0.2032	12.6917	0.2858	12.692	0.44295	12.6918	0.9249	12.692	0.7818	12.692	0.6237
12.7002	0.1763	12.7003	0.20145	12.7	0.28435	12.7003	0.43165	12.7002	0.92305	12.7003	0.7709	12.7003	0.6239
12.7085	0.1754	12.7087	0.20105	12.7083	0.2837	12.7087	0.42165	12.7085	0.91915	12.7087	0.7611	12.7087	0.622
12.7168	0.17415	12.717	0.1998	12.7167	0.28265	12.717	0.4112	12.7168	0.9155	12.717	0.7494	12.717	0.61945
12.7252	0.1732	12.7253	0.19995	12.725	0.28285	12.7253	0.40405	12.7252	0.9122	12.7253	0.74045	12.7253	0.61765
12.7335	0.1724	12.7337	0.19945	12.7333	0.2822	12.7337	0.3972	12.7335	0.90975	12.7337	0.733	12.7337	0.61725
12.7418	0.16905	12.742	0.19715	12.7417	0.28045	12.742	0.3883	12.7418	0.90485	12.742	0.72325	12.742	0.61305
12.7502	0.16845	12.7503	0.1971	12.75	0.2807	12.7503	0.38175	12.7502	0.90265	12.7503	0.7145	12.7503	0.6117
12.7585	0.1678	12.7587	0.1978	12.7583	0.28075	12.7587	0.3725	12.7585	0.90025	12.7587	0.70495	12.7587	0.6113
12.7668	0.16845	12.767	0.19735	12.7667	0.2804	12.767	0.36705	12.7668	0.8975	12.767	0.6994	12.767	0.6086
12.7752	0.1667	12.7753	0.1982	12.775	0.281	12.7753	0.3598	12.7752	0.89445	12.7753	0.68995	12.7753	0.6075
12.7835	0.1633	12.7837	0.197	12.7833	0.27935	12.7837	0.35355	12.7835	0.8925	12.7837	0.68385	12.7837	0.60565
12.7918	0.1637	12.792	0.19615	12.7917	0.2797	12.792	0.34725	12.7918	0.88965	12.792	0.67875	12.792	0.60435
12.8002	0.16365	12.8003	0.1968	12.8	0.27995	12.8003	0.34365	12.8002	0.8861	12.8003	0.672	12.8003	0.60355
12.8085	0.16255	12.8087	0.1949	12.8083	0.27995	12.8087	0.33875	12.8085	0.8843	12.8087	0.6645	12.8087	0.60125
12.8168	0.1644	12.817	0.19525	12.8167	0.2788	12.817	0.3332	12.8168	0.8828	12.817	0.6588	12.817	0.5995
12.8252	0.1633	12.8253	0.19425	12.825	0.27835	12.8253	0.32565	12.8252	0.8807	12.8253	0.65285	12.8253	0.59985
12.8335	0.1633	12.8337	0.1955	12.8333	0.2798	12.8337	0.32185	12.8335	0.87865	12.8337	0.6474	12.8337	0.59915
12.8418	0.1601	12.842	0.1921	12.8417	0.2785	12.842	0.3164	12.8418	0.8758	12.842	0.6396	12.842	0.59635
12.8502	0.1604	12.8503	0.19125	12.85	0.27805	12.8503	0.31195	12.8502	0.8735	12.8503	0.6365	12.8503	0.59515
12.8585	0.1583	12.8587	0.19035	12.8583	0.27795	12.8587	0.307	12.8585	0.8724	12.8587	0.6285	12.8587	0.5927
12.8668	0.15995	12.867	0.19245	12.8667	0.27815	12.867	0.30185	12.8668	0.87045	12.867	0.62355	12.867	0.59215
12.8752	0.15915	12.8753	0.19225	12.875	0.27925	12.8753	0.29965	12.8752	0.87035	12.8753	0.61815	12.8753	0.59275
12.8835	0.1573	12.8837	0.1903	12.8833	0.28005	12.8837	0.295	12.8835	0.86895	12.8837	0.6147	12.8837	0.59055
12.8918	0.15565	12.892	0.18865	12.8917	0.27695	12.892	0.2882	12.8918	0.8654	12.892	0.6077	12.892	0.5891
12.9002	0.1553	12.9003	0.1869	12.9	0.27875	12.9003	0.28345	12.9002	0.86485	12.9003	0.60305	12.9003	0.58825
12.9085	0.1565	12.9087	0.18665	12.9083	0.2783	12.9087	0.27775	12.9085	0.86475	12.9087	0.59665	12.9087	0.58675
12.9168	0.15725	12.917	0.18715	12.9167	0.27865	12.917	0.27515	12.9168	0.8632	12.917	0.59295	12.917	0.5859
12.9252	0.15485	12.9253	0.18715	12.925	0.27855	12.9253	0.27185	12.9252	0.86125	12.9253	0.5877	12.9253	0.5841
12.9335	0.1548	12.9337	0.18815	12.9333	0.2795	12.9337	0.2665	12.9335	0.86185	12.9337	0.5825	12.9337	0.58445
12.9418	0.15455	12.942	0.18605	12.9417	0.28035	12.942	0.265	12.9418	0.86135	12.942	0.57765	12.942	0.5837
12.9502	0.1532	12.9503	0.18455	12.95	0.27805	12.9503	0.25805	12.9502	0.8584	12.9503	0.5718	12.9503	0.5811
12.9585	0.15295	12.9587	0.18475	12.9583	0.2789	12.9587	0.2548	12.9585	0.85715	12.9587	0.56805	12.9587	0.5789
12.9668	0.15085	12.967	0.18395	12.9667	0.27895	12.967	0.25085	12.9668	0.85575	12.967	0.5643	12.967	0.578
12.9752	0.1522	12.9753	0.1836	12.975	0.2793	12.9753	0.24975	12.9752	0.85595	12.9753	0.56125	12.9753	0.57955
12.9835	0.1516	12.9837	0.18495	12.9833	0.27965	12.9837	0.2467	12.9835	0.8549	12.9837	0.5584	12.9837	0.5777
12.9918	0.15305	12.992	0.1846	12.9917	0.28025	12.992	0.24275	12.9918	0.85375	12.992	0.55445	12.992	0.5785
13.0002	0.15055	13.0003	0.18245	13	0.27775	13.0003	0.24065	13.0002	0.8516	13.0003	0.55025	13.0003	0.5752
13.0085	0.15125	13.0087	0.1853	13.0083	0.2797	13.0087	0.2361	13.0085	0.85285	13.0087	0.5462	13.0087	0.57445
13.0168	0.1487	13.017	0.1846	13.0167	0.2791	13.017	0.23295	13.0168	0.84945	13.017	0.5441	13.017	0.57295
13.0252	0.15065	13.0253	0.1856	13.025	0.28135	13.0253	0.23165	13.0252	0.849	13.0253	0.5403	13.0253	0.57285
13.0335	0.15135	13.0337	0.1866	13.0333	0.28185	13.0337	0.2287	13.0335	0.84875	13.0337	0.5361	13.0337	0.5734
13.0418	0.1494	13.042	0.18695	13.0417	0.2804	13.042	0.2252	13.0418	0.84835	13.042	0.53305	13.042	0.57115
13.0502	0.1483	13.0503	0.1874	13.05	0.28115	13.0503	0.2222	13.0502	0.8476	13.0503	0.527	13.0503	0.57085
13.0585	0.14825	13.0587	0.1896	13.0583	0.28165	13.0587	0.2194	13.0585	0.848	13.0587	0.526	13.0587	0.56945
13.0668	0.14675	13.067	0.19005	13.0667	0.28115	13.067	0.21615	13.0668	0.8469	13.067	0.5217	13.067	0.56885
13.0752	0.1482	13.0753	0.1916	13.075	0.28305	13.0753	0.2148	13.0752	0.84725	13.0753	0.52165	13.0753	0.5699
13.0835	0.14825	13.0837	0.1954	13.0833	0.28665	13.0837	0.21235	13.0835	0.8488	13.0837	0.51785	13.0837	0.57085
13.0918	0.1474	13.092	0.19735	13.0917	0.286	13.092	0.20675	13.0918	0.8488	13.092	0.5141	13.092	0.57165
13.1002	0.1475	13.1003	0.19905	13.1	0.2884	13.1003	0.2066	13.1002	0.84875	13.1003	0.5129	13.1003	0.5718
13.1085	0.14745	13.1087	0.20065	13.1083	0.28835	13.1087	0.20255	13.1085	0.8506	13.1087	0.50845	13.1087	0.5716
13.1168	0.1475	13.117	0.2021	13.1167	0.2893	13.117	0.20105	13.1168	0.84915	13.117	0.5047	13.117	0.57205
13.1252	0.1462	13.1253	0.2028	13.125	0.2903	13.1253	0.1967	13.1252	0.8518	13.1253	0.5007	13.1253	0.57265
13.1335	0.14625	13.1337	0.2037	13.1333	0.2893	13.1337	0.1961	13.1335	0.854	13.1337	0.4989	13.1337	0.5755
13.1418	0.14605	13.142	0.2054	13.1417	0.29005	13.142	0.1929	13.1418	0.8553	13.142	0.4965	13.142	0.5761
13.1502	0.1459	13.1503	0.20695	13.15	0.2911	13.1503	0.19085	13.1502	0.85835	13.1503	0.49265	13.1503	0.5782
13.1585	0.14405	13.1587	0.207	13.1583	0.29065	13.1587	0.1895	13.1585	0.85855	13.1587	0.4924	13.1587	0.58095
13.1668	0.14565	13.167	0.2069	13.1667	0.29175	13.167	0.1889	13.1668	0.86405	13.167	0.49	13.167	0.58415
13.1752	0.14425	13.1753	0.2057	13.175	0.29265	13.1753	0.1851	13.1752	0.86595	13.1753	0.48775	13.1753	0.58595
13.1835	0.1445	13.1837	0.20555	13.1833	0.2902	13.1837	0.1853	13.1835	0.86945	13.1837	0.48515	13.1837	0.59065
13.1918	0.1436	13.192	0.20565	13.1917	0.29135	13.192	0.1825	13.1918	0.87205	13.192	0.484	13.192	0.5939
13.2002	0.14365	13.2003	0.2049	13.2	0.28985	13.2003	0.1779	13.2002	0.87635	13.2003	0.48055	13.2003	0.599
13.2085	0.14395	13.2087	0.2037	13.2083	0.28895	13.2087	0.1764	13.2085	0.8782	13.2087	0.47645	13.2087	0.60225
13.2168	0.14275	13.217	0.2027	13.2167	0.28825	13.217	0.17615	13.2168	0.8797	13.217	0.4759	13.217	0.60575
13.2252	0.14255	13.2253	0.19975	13.225	0.2873	13.2253	0.17385	13.2252	0.88035	13.2253	0.47165	13.2253	0.61115
13.2335	0.14255	13.2337	0.199	13.2333	0.287	13.2337	0.1737	13.2335	0.88115	13.2337	0.47025	13.2337	0.6151
13.2418	0.1427	13.242	0.19715	13.2417	0.28675	13.242	0.1714	13.2418	0.88105	13.242	0.4668	13.242	0.61965
13.2502	0.14025	13.2503	0.19535	13.25	0.2851	13.2503	0.1687	13.2502	0.88155	13.2503	0.46515	13.2503	0.62275
13.2585	0.1403	13.2587	0.1932	13.2583	0.2851	13.2587	0.16645	13.2585	0.88035	13.2587	0.4622	13.2587	0.62545
13.2668	0.13945	13.267	0.1915	13.2667	0.28355	13.267	0.1637	13.2668	0.8772	13.267	0.46145	13.267	0.629
13.2752	0.1382	13.2753	0.1899	13.275	0.2817	13.2753	0.16215	13.2752	0.8748	13.2753	0.45845	13.2753	0.6291
13.2835	0.1374	13.2837	0.1875	13.2833	0.27925	13.2837	0.1578	13.2835	0.87215	13.2837	0.45615	13.2837	0.6302
13.2918	0.14	13.292	0.1872	13.2917	0.27975	13.292	0.1596	13.2918	0.8692	13.292	0.4547	13.292	0.63315
13.3002	0.1391	13.3003	0.1851	13.3	0.27915	13.3003	0.15675	13.3002	0.8658	13.3003	0.4509	13.3003	0.63245
13.3085	0.1381	13.3087	0.18335	13.3083	0.27845	13.3087	0.15535	13.3085	0.8591	13.3087	0.4485	13.3087	0.63135
13.3168	0.1384	13.317	0.1817	13.3167	0.27955	13.317	0.1526	13.3168	0.856	13.317	0.44475	13.317	0.6324
13.3252	0.13915	13.3253	0.18165	13.325	0.28	13.3253	0.1535	13.3252	0.8525	13.3253	0.4455	13.3253	0.6314
13.3335	0.1382	13.3337	0.17915	13.3333	0.2795	13.3337	0.15015	13.3335	0.8451	13.3337	0.4429	13.3337	0.6302
13.3418	0.13725	13.342	0.17895	13.3417	0.27985	13.342	0.15185	13.3418	0.8408	13.342	0.4436	13.342	0.6299
13.3502	0.13605	13.3503	0.17685	13.35	0.27845	13.3503	0.14985	13.3502	0.83475	13.3503	0.4406	13.3503	0.6285
13.3585	0.138	13.3587	0.17735	13.3583	0.28055	13.3587	0.14985	13.3585	0.8305	13.3587	0.4402	13.3587	0.6271
13.3668	0.1386	13.367	0.1764	13.3667	0.2831	13.367	0.15135	13.3668	0.82565	13.367	0.44005	13.367	0.62615
13.3752	0.1368	13.3753	0.1763	13.375	0.2828	13.3753	0.1466	13.3752	0.821	13.3753	0.43515	13.3753	0.6237
13.3835	0.13815	13.3837	0.1755	13.3833	0.2863	13.3837	0.146	13.3835	0.81895	13.3837	0.43555	13.3837	0.62425
13.3918	0.13765	13.392	0.17525	13.3917	0.2875	13.392	0.14465	13.3918	0.8143	13.392	0.43395	13.392	0.62155
13.4002	0.13715	13.4003	0.17335	13.4	0.2899	13.4003	0.14305	13.4002	0.80995	13.4003	0.4317	13.4003	0.6185
13.4085	0.13705	13.4087	0.1737	13.4083	0.2941	13.4087	0.1439	13.4085	0.808	13.4087	0.4349	13.4087	0.6202
13.4168	0.13695	13.417	0.1737	13.4167	0.2963	13.417	0.14265	13.4168	0.80335	13.417	0.43215	13.417	0.6194
13.4252	0.1373	13.4253	0.17325	13.425	0.30195	13.4253	0.14165	13.4252	0.8003	13.4253	0.4319	13.4253	0.6182
13.4335	0.1363	13.4337	0.17475	13.4333	0.3065	13.4337	0.14085	13.4335	0.7969	13.4337	0.4326	13.4337	0.6196
13.4418	0.1384	13.442	0.1738	13.4417	0.31015	13.442	0.1388	13.4418	0.7967	13.442	0.43095	13.442	0.6203
13.4502	0.13775	13.4503	0.1738	13.45	0.31685	13.4503	0.13815	13.4502	0.7928	13.4503	0.43085	13.4503	0.61875
13.4585	0.13965	13.4587	0.176	13.4583	0.3243	13.4587	0.13665	13.4585	0.7935	13.4587	0.43195	13.4587	0.6226
13.4668	0.14015	13.467	0.17595	13.4667	0.32985	13.467	0.1369	13.4668	0.79	13.467	0.43335	13.467	0.6231
13.4752	0.14165	13.4753	0.17875	13.475	0.3369	13.4753	0.1363	13.4752	0.78975	13.4753	0.43215	13.4753	0.62705
13.4835	0.1443	13.4837	0.17935	13.4833	0.34475	13.4837	0.1389	13.4835	0.7919	13.4837	0.4384	13.4837	0.62985
13.4918	0.14675	13.492	0.18295	13.4917	0.35335	13.492	0.13845	13.4918	0.79205	13.492	0.4395	13.492	0.6344
13.5002	0.1484	13.5003	0.1841	13.5	0.3613	13.5003	0.13805	13.5002	0.7923	13.5003	0.4415	13.5003	0.63745
13.5085	0.15175	13.5087	0.1864	13.5083	0.3698	13.5087	0.13865	13.5085	0.79285	13.5087	0.44645	13.5087	0.64265
13.5168	0.15575	13.517	0.1895	13.5167	0.37885	13.517	0.14055	13.5168	0.79555	13.517	0.44955	13.517	0.6477
13.5252	0.15785	13.5253	0.19245	13.525	0.38735	13.5253	0.13905	13.5252	0.79805	13.5253	0.44985	13.5253	0.65115
13.5335	0.1607	13.5337	0.1963	13.5333	0.3953	13.5337	0.14395	13.5335	0.80015	13.5337	0.45605	13.5337	0.6579
13.5418	0.16545	13.542	0.20195	13.5417	0.4054	13.542	0.14545	13.5418	0.8042	13.542	0.45935	13.542	0.66435
13.5502	0.1717	13.5503	0.2073	13.55	0.41395	13.5503	0.1466	13.5502	0.8072	13.5503	0.46165	13.5503	0.67025
13.5585	0.17565	13.5587	0.21395	13.5583	0.42355	13.5587	0.1504	13.5585	0.81195	13.5587	0.46375	13.5587	0.67565
13.5668	0.18465	13.567	0.22175	13.5667	0.4356	13.567	0.15095	13.5668	0.81735	13.567	0.46575	13.567	0.6863
13.5752	0.1898	13.5753	0.2287	13.575	0.44415	13.5753	0.15515	13.5752	0.8232	13.5753	0.46895	13.5753	0.69275
13.5835	0.19525	13.5837	0.2365	13.5833	0.4512	13.5837	0.1595	13.5835	0.82835	13.5837	0.4701	13.5837	0.69865
13.5918	0.20265	13.592	0.2436	13.5917	0.46085	13.592	0.15945	13.5918	0.8339	13.592	0.46645	13.592	0.70665
13.6002	0.21175	13.6003	0.25325	13.6	0.4685	13.6003	0.1646	13.6002	0.8414	13.6003	0.4657	13.6003	0.71445
13.6085	0.2208	13.6087	0.26215	13.6083	0.47595	13.6087	0.16605	13.6085	0.84785	13.6087	0.4637	13.6087	0.7222
13.6168	0.2278	13.617	0.27085	13.6167	0.48445	13.617	0.1686	13.6168	0.8549	13.617	0.46305	13.617	0.73005
13.6252	0.2374	13.6253	0.2821	13.625	0.49005	13.6253	0.17085	13.6252	0.8617	13.6253	0.4618	13.6253	0.7358
13.6335	0.24475	13.6337	0.29125	13.6333	0.4968	13.6337	0.1716	13.6335	0.8704	13.6337	0.45735	13.6337	0.7444
13.6418	0.25315	13.642	0.29935	13.6417	0.50335	13.642	0.1718	13.6418	0.87675	13.642	0.4533	13.642	0.75075
13.6502	0.2625	13.6503	0.3109	13.65	0.50875	13.6503	0.17245	13.6502	0.88605	13.6503	0.4519	13.6503	0.75865
13.6585	0.2721	13.6587	0.3214	13.6583	0.51415	13.6587	0.1716	13.6585	0.8943	13.6587	0.44535	13.6587	0.765
13.6668	0.2828	13.667	0.33015	13.6667	0.5174	13.667	0.16875	13.6668	0.9005	13.667	0.43995	13.667	0.7697
13.6752	0.291	13.6753	0.34045	13.675	0.522	13.6753	0.1675	13.6752	0.90775	13.6753	0.43525	13.6753	0.77715
13.6835	0.30035	13.6837	0.34835	13.6833	0.52505	13.6837	0.1658	13.6835	0.91295	13.6837	0.4295	13.6837	0.7797
13.6918	0.3105	13.692	0.35755	13.6917	0.52965	13.692	0.16305	13.6918	0.9214	13.692	0.4243	13.692	0.7864
13.7002	0.3184	13.7003	0.36605	13.7	0.53145	13.7003	0.16175	13.7002	0.92835	13.7003	0.4202	13.7003	0.7908
13.7085	0.32675	13.7087	0.372	13.7083	0.53355	13.7087	0.16025	13.7085	0.9328	13.7087	0.41395	13.7087	0.7921
13.7168	0.33525	13.717	0.3777	13.7167	0.5364	13.717	0.1571	13.7168	0.9381	13.717	0.4092	13.717	0.7959
13.7252	0.34235	13.7253	0.384	13.725	0.5388	13.7253	0.15625	13.7252	0.943	13.7253	0.40625	13.7253	0.8015
13.7335	0.34945	13.7337	0.39	13.7333	0.5398	13.7337	0.1534	13.7335	0.94885	13.7337	0.403	13.7337	0.80265
13.7418	0.35655	13.742	0.39375	13.7417	0.54305	13.742	0.151	13.7418	0.95385	13.742	0.40165	13.742	0.8064
13.7502	0.364	13.7503	0.39675	13.75	0.543	13.7503	0.149	13.7502	0.95735	13.7503	0.3989	13.7503	0.8089
13.7585	0.3702	13.7587	0.4002	13.7583	0.54395	13.7587	0.1457	13.7585	0.96235	13.7587	0.3962	13.7587	0.81135
13.7668	0.37535	13.767	0.40055	13.7667	0.5441	13.767	0.1429	13.7668	0.96515	13.767	0.3928	13.767	0.81125
13.7752	0.3791	13.7753	0.4031	13.775	0.54595	13.7753	0.1402	13.7752	0.96815	13.7753	0.3922	13.7753	0.81305
13.7835	0.38335	13.7837	0.4043	13.7833	0.5465	13.7837	0.13525	13.7835	0.97205	13.7837	0.38945	13.7837	0.8145
13.7918	0.38845	13.792	0.4033	13.7917	0.5454	13.792	0.13425	13.7918	0.976	13.792	0.3887	13.792	0.81595
13.8002	0.391	13.8003	0.4021	13.8	0.54415	13.8003	0.13245	13.8002	0.9761	13.8003	0.387	13.8003	0.8151
13.8085	0.3949	13.8087	0.40145	13.8083	0.54315	13.8087	0.1291	13.8085	0.9779	13.8087	0.3864	13.8087	0.81645
13.8168	0.3976	13.817	0.3966	13.8167	0.53995	13.817	0.12435	13.8168	0.98	13.817	0.3853	13.817	0.81665
13.8252	0.4014	13.8253	0.3922	13.825	0.53955	13.8253	0.1232	13.8252	0.98185	13.8253	0.3889	13.8253	0.81805
13.8335	0.40295	13.8337	0.3865	13.8333	0.5367	13.8337	0.1198	13.8335	0.98325	13.8337	0.38865	13.8337	0.818
13.8418	0.40445	13.842	0.37955	13.8417	0.53165	13.842	0.11545	13.8418	0.98225	13.842	0.38795	13.842	0.81715
13.8502	0.40745	13.8503	0.3723	13.85	0.5289	13.8503	0.116	13.8502	0.9855	13.8503	0.39175	13.8503	0.81635
13.8585	0.4113	13.8587	0.366	13.8583	0.5247	13.8587	0.1134	13.8585	0.9863	13.8587	0.39155	13.8587	0.8173
13.8668	0.4116	13.867	0.3577	13.8667	0.5183	13.867	0.1125	13.8668	0.9848	13.867	0.3962	13.867	0.8161
13.8752	0.41145	13.8753	0.34715	13.875	0.51105	13.8753	0.11025	13.8752	0.98405	13.8753	0.3998	13.8753	0.8143
13.8835	0.4138	13.8837	0.3365	13.8833	0.50325	13.8837	0.10945	13.8835	0.9839	13.8837	0.40205	13.8837	0.81475
13.8918	0.4142	13.892	0.32615	13.8917	0.49505	13.892	0.10805	13.8918	0.98235	13.892	0.4077	13.892	0.81065
13.9002	0.4137	13.9003	0.3147	13.9	0.48495	13.9003	0.1057	13.9002	0.9804	13.9003	0.4127	13.9003	0.80725
13.9085	0.41235	13.9087	0.304	13.9083	0.47655	13.9087	0.10595	13.9085	0.97735	13.9087	0.4201	13.9087	0.80285
13.9168	0.4137	13.917	0.2922	13.9167	0.4663	13.917	0.1073	13.9168	0.97495	13.917	0.4269	13.917	0.7999
13.9252	0.4148	13.9253	0.28335	13.925	0.45525	13.9253	0.1085	13.9252	0.9715	13.9253	0.43655	13.9253	0.79595
13.9335	0.41515	13.9337	0.27075	13.9333	0.4433	13.9337	0.1107	13.9335	0.9672	13.9337	0.4453	13.9337	0.7909
13.9418	0.41215	13.942	0.2581	13.9417	0.4288	13.942	0.10945	13.9418	0.9599	13.942	0.4502	13.942	0.78635
13.9502	0.4093	13.9503	0.24885	13.95	0.4158	13.9503	0.1111	13.9502	0.9535	13.9503	0.45985	13.9503	0.77965
13.9585	0.40765	13.9587	0.23815	13.9583	0.40515	13.9587	0.1125	13.9585	0.94575	13.9587	0.4664	13.9587	0.77105
13.9668	0.4041	13.967	0.2282	13.9667	0.3912	13.967	0.1169	13.9668	0.936	13.967	0.47545	13.967	0.76245
13.9752	0.4026	13.9753	0.2194	13.975	0.3792	13.9753	0.1181	13.9752	0.9277	13.9753	0.48035	13.9753	0.75355
13.9835	0.3982	13.9837	0.2118	13.9833	0.3674	13.9837	0.1235	13.9835	0.9154	13.9837	0.48875	13.9837	0.74265
13.9918	0.3938	13.992	0.2046	13.9917	0.3564	13.992	0.1272	13.9918	0.9051	13.992	0.4967	13.992	0.73305
14.0002	0.38755	14.0003	0.1972	14	0.34595	14.0003	0.13075	14.0002	0.8927	14.0003	0.50385	14.0003	0.722
14.0085	0.38215	14.0087	0.18955	14.0083	0.33445	14.0087	0.1347	14.0085	0.88085	14.0087	0.51055	14.0087	0.70905
14.0168	0.3761	14.017	0.18535	14.0167	0.32705	14.017	0.14135	14.0168	0.86875	14.017	0.5193	14.017	0.6984
14.0252	0.3661	14.0253	0.1799	14.025	0.31865	14.0253	0.14605	14.0252	0.8536	14.0253	0.52305	14.0253	0.68545
14.0335	0.35715	14.0337	0.17655	14.0333	0.3106	14.0337	0.15415	14.0335	0.84125	14.0337	0.5296	14.0337	0.67285
14.0418	0.34945	14.042	0.17035	14.0417	0.30375	14.042	0.16285	14.0418	0.82585	14.042	0.53575	14.042	0.65945
14.0502	0.3385	14.0503	0.16765	14.05	0.2978	14.0503	0.1712	14.0502	0.8146	14.0503	0.53985	14.0503	0.6475
14.0585	0.32935	14.0587	0.164	14.0583	0.2924	14.0587	0.17675	14.0585	0.8014	14.0587	0.54255	14.0587	0.6351
14.0668	0.31515	14.067	0.15955	14.0667	0.2872	14.067	0.1865	14.0668	0.78765	14.067	0.54635	14.067	0.62145
14.0752	0.306	14.0753	0.15965	14.075	0.28505	14.0753	0.19695	14.0752	0.7768	14.0753	0.5509	14.0753	0.6122
14.0835	0.29295	14.0837	0.1554	14.0833	0.28095	14.0837	0.2038	14.0835	0.76505	14.0837	0.55295	14.0837	0.5982
14.0918	0.28015	14.092	0.15345	14.0917	0.278	14.092	0.2171	14.0918	0.7546	14.092	0.5587	14.092	0.58795
14.1002	0.2679	14.1003	0.1527	14.1	0.27755	14.1003	0.22845	14.1002	0.7449	14.1003	0.56105	14.1003	0.57735
14.1085	0.25665	14.1087	0.151	14.1083	0.27765	14.1087	0.23855	14.1085	0.73705	14.1087	0.5654	14.1087	0.57035
14.1168	0.24705	14.117	0.1513	14.1167	0.2801	14.117	0.24985	14.1168	0.73115	14.117	0.56805	14.117	0.56255
14.1252	0.2341	14.1253	0.14975	14.125	0.28045	14.1253	0.2602	14.1252	0.7232	14.1253	0.57005	14.1253	0.5545
14.1335	0.2228	14.1337	0.14775	14.1333	0.28045	14.1337	0.26865	14.1335	0.7174	14.1337	0.5689	14.1337	0.5476
14.1418	0.21375	14.142	0.1461	14.1417	0.28305	14.142	0.27735	14.1418	0.71145	14.142	0.57345	14.142	0.5423
14.1502	0.2047	14.1503	0.1463	14.15	0.28585	14.1503	0.286	14.1502	0.7072	14.1503	0.57765	14.1503	0.5366
14.1585	0.1944	14.1587	0.14535	14.1583	0.28775	14.1587	0.29465	14.1585	0.70375	14.1587	0.57895	14.1587	0.5318
14.1668	0.18695	14.167	0.1444	14.1667	0.2909	14.167	0.30305	14.1668	0.70215	14.167	0.5783	14.167	0.5287
14.1752	0.17805	14.1753	0.14385	14.175	0.294	14.1753	0.3115	14.1752	0.69945	14.1753	0.5808	14.1753	0.52345
14.1835	0.17225	14.1837	0.144	14.1833	0.2986	14.1837	0.31785	14.1835	0.699	14.1837	0.5821	14.1837	0.52155
14.1918	0.1656	14.192	0.14325	14.1917	0.3022	14.192	0.32185	14.1918	0.69905	14.192	0.58035	14.192	0.51925
14.2002	0.1594	14.2003	0.14275	14.2	0.30615	14.2003	0.32805	14.2002	0.698	14.2003	0.58215	14.2003	0.517
14.2085	0.1559	14.2087	0.14485	14.2083	0.31225	14.2087	0.3339	14.2085	0.70105	14.2087	0.58305	14.2087	0.5188
14.2168	0.1491	14.217	0.14365	14.2167	0.31455	14.217	0.33855	14.2168	0.7007	14.217	0.58305	14.217	0.5138
14.2252	0.14575	14.2253	0.1431	14.225	0.31755	14.2253	0.3411	14.2252	0.70375	14.2253	0.5832	14.2253	0.51415
14.2335	0.14165	14.2337	0.1443	14.2333	0.3215	14.2337	0.348	14.2335	0.7072	14.2337	0.58575	14.2337	0.51435
14.2418	0.1397	14.242	0.1452	14.2417	0.3252	14.242	0.35165	14.2418	0.7091	14.242	0.5869	14.242	0.51345
14.2502	0.1366	14.2503	0.1424	14.25	0.32755	14.2503	0.3556	14.2502	0.7132	14.2503	0.5846	14.2503	0.511
14.2585	0.1332	14.2587	0.1455	14.2583	0.3309	14.2587	0.359	14.2585	0.7169	14.2587	0.5873	14.2587	0.51275
14.2668	0.13185	14.267	0.1446	14.2667	0.3358	14.267	0.36415	14.2668	0.7206	14.267	0.58875	14.267	0.51195
14.2752	0.12765	14.2753	0.14675	14.275	0.33945	14.2753	0.36405	14.2752	0.726	14.2753	0.5899	14.2753	0.5107
14.2835	0.12615	14.2837	0.14645	14.2833	0.3431	14.2837	0.36645	14.2835	0.7309	14.2837	0.5896	14.2837	0.51015
14.2918	0.12575	14.292	0.1495	14.2917	0.35175	14.292	0.36885	14.2918	0.73615	14.292	0.5901	14.292	0.51165
14.3002	0.1242	14.3003	0.15	14.3	0.35845	14.3003	0.37195	14.3002	0.7418	14.3003	0.59025	14.3003	0.5114
14.3085	0.12325	14.3087	0.1502	14.3083	0.36705	14.3087	0.3742	14.3085	0.7459	14.3087	0.58995	14.3087	0.509
14.3168	0.12125	14.317	0.154	14.3167	0.37915	14.317	0.3727	14.3168	0.75235	14.317	0.58705	14.317	0.51005
14.3252	0.1192	14.3253	0.1543	14.325	0.3903	14.3253	0.3726	14.3252	0.75745	14.3253	0.58475	14.3253	0.50855
14.3335	0.1194	14.3337	0.15775	14.3333	0.40645	14.3337	0.37265	14.3335	0.76275	14.3337	0.581	14.3337	0.50805
14.3418	0.11665	14.342	0.1589	14.3417	0.4208	14.342	0.36965	14.3418	0.76925	14.342	0.5764	14.342	0.50645
14.3502	0.11595	14.3503	0.16415	14.35	0.4432	14.3503	0.3671	14.3502	0.7771	14.3503	0.5721	14.3503	0.5079
14.3585	0.117	14.3587	0.16925	14.3583	0.4645	14.3587	0.364	14.3585	0.78555	14.3587	0.56425	14.3587	0.50825
14.3668	0.1161	14.367	0.17215	14.3667	0.48895	14.367	0.3592	14.3668	0.79665	14.367	0.55775	14.367	0.5097
14.3752	0.11445	14.3753	0.17875	14.375	0.51465	14.3753	0.35295	14.3752	0.8111	14.3753	0.5489	14.3753	0.5107
14.3835	0.1159	14.3837	0.1863	14.3833	0.54215	14.3837	0.34635	14.3835	0.82995	14.3837	0.5421	14.3837	0.51455
14.3918	0.11355	14.392	0.193	14.3917	0.5663	14.392	0.33635	14.3918	0.85115	14.392	0.5277	14.392	0.51615
14.4002	0.11065	14.4003	0.2013	14.4	0.5938	14.4003	0.32745	14.4002	0.8785	14.4003	0.51945	14.4003	0.51975
14.4085	0.1116	14.4087	0.21245	14.4083	0.62205	14.4087	0.32135	14.4085	0.91335	14.4087	0.50935	14.4087	0.52615
14.4168	0.1123	14.417	0.22315	14.4167	0.64985	14.417	0.30805	14.4168	0.95375	14.417	0.49335	14.417	0.5327
14.4252	0.11335	14.4253	0.23775	14.425	0.6776	14.4253	0.2977	14.4252	1.00365	14.4253	0.48145	14.4253	0.5428
14.4335	0.1106	14.4337	0.25015	14.4333	0.7009	14.4337	0.28465	14.4335	1.0568	14.4337	0.4663	14.4337	0.5505
14.4418	0.1116	14.442	0.265	14.4417	0.72415	14.442	0.2696	14.4418	1.11665	14.442	0.4521	14.442	0.56165
14.4502	0.11	14.4503	0.28235	14.45	0.74625	14.4503	0.2552	14.4502	1.1806	14.4503	0.4401	14.4503	0.57285
14.4585	0.11155	14.4587	0.30065	14.4583	0.7656	14.4587	0.24135	14.4585	1.24835	14.4587	0.4239	14.4587	0.5854
14.4668	0.1089	14.467	0.32095	14.4667	0.7829	14.467	0.2257	14.4668	1.31695	14.467	0.41115	14.467	0.5994
14.4752	0.10935	14.4753	0.34585	14.475	0.79855	14.4753	0.21385	14.4752	1.3881	14.4753	0.3997	14.4753	0.6152
14.4835	0.1089	14.4837	0.37625	14.4833	0.81265	14.4837	0.1982	14.4835	1.4563	14.4837	0.38775	14.4837	0.6283
14.4918	0.10905	14.492	0.4105	14.4917	0.8276	14.492	0.18555	14.4918	1.526	14.492	0.3772	14.492	0.64585
14.5002	0.1077	14.5003	0.45285	14.5	0.83915	14.5003	0.17015	14.5002	1.5927	14.5003	0.364	14.5003	0.66125
14.5085	0.1086	14.5087	0.50665	14.5083	0.85175	14.5087	0.1572	14.5085	1.6624	14.5087	0.3562	14.5087	0.67965
14.5168	0.10685	14.517	0.56695	14.5167	0.8623	14.517	0.1454	14.5168	1.7298	14.517	0.3457	14.517	0.69485
14.5252	0.10745	14.5253	0.6394	14.525	0.87505	14.5253	0.13315	14.5252	1.79945	14.5253	0.3362	14.5253	0.7122
14.5335	0.1066	14.5337	0.7199	14.5333	0.88495	14.5337	0.11905	14.5335	1.87525	14.5337	0.32655	14.5337	0.731
14.5418	0.10525	14.542	0.8084	14.5417	0.8964	14.542	0.11235	14.5418	1.95355	14.542	0.3204	14.542	0.7472
14.5502	0.1068	14.5503	0.90215	14.55	0.90885	14.5503	0.1025	14.5502	2.04085	14.5503	0.31115	14.5503	0.7678
14.5585	0.10485	14.5587	0.9968	14.5583	0.923	14.5587	0.095	14.5585	2.13385	14.5587	0.3059	14.5587	0.7845
14.5668	0.1096	14.567	1.0912	14.5667	0.93745	14.567	0.0867	14.5668	2.23695	14.567	0.3003	14.567	0.80875
14.5752	0.10715	14.5753	1.17555	14.575	0.9483	14.5753	0.08045	14.5752	2.341	14.5753	0.295	14.5753	0.8285
14.5835	0.1067	14.5837	1.2532	14.5833	0.96115	14.5837	0.07535	14.5835	2.4487	14.5837	0.2904	14.5837	0.8526
14.5918	0.1061	14.592	1.31885	14.5917	0.97	14.592	0.0686	14.5918	2.5532	14.592	0.28685	14.592	0.8781
14.6002	0.10625	14.6003	1.37095	14.6	0.9817	14.6003	0.06395	14.6002	2.6555	14.6003	0.28305	14.6003	0.90775
14.6085	0.1087	14.6087	1.4132	14.6083	0.9928	14.6087	0.06165	14.6085	2.7516	14.6087	0.2814	14.6087	0.946
14.6168	0.10685	14.617	1.43995	14.6167	1.00185	14.617	0.0575	14.6168	2.8372	14.617	0.27905	14.617	0.9841
14.6252	0.1067	14.6253	1.45275	14.625	1.007	14.6253	0.055	14.6252	2.90735	14.6253	0.278	14.6253	1.0297
14.6335	0.10755	14.6337	1.4522	14.6333	1.00935	14.6337	0.05505	14.6335	2.9639	14.6337	0.2801	14.6337	1.081
14.6418	0.10535	14.642	1.43945	14.6417	1.00755	14.642	0.05185	14.6418	3.00485	14.642	0.28045	14.642	1.13575
14.6502	0.10645	14.6503	1.41845	14.65	1.0072	14.6503	0.05125	14.6502	3.03275	14.6503	0.2825	14.6503	1.19895
14.6585	0.10505	14.6587	1.38835	14.6583	0.99965	14.6587	0.0497	14.6585	3.04125	14.6587	0.2865	14.6587	1.2636
14.6668	0.1071	14.667	1.3504	14.6667	0.992	14.667	0.0476	14.6668	3.0396	14.667	0.29165	14.667	1.3317
14.6752	0.10845	14.6753	1.307	14.675	0.9787	14.6753	0.04825	14.6752	3.0234	14.6753	0.30015	14.6753	1.3997
14.6835	0.1072	14.6837	1.25895	14.6833	0.9625	14.6837	0.04725	14.6835	2.99545	14.6837	0.3061	14.6837	1.4648
14.6918	0.1048	14.692	1.2083	14.6917	0.94315	14.692	0.04615	14.6918	2.957	14.692	0.31295	14.692	1.5266
14.7002	0.1058	14.7003	1.154	14.7	0.92315	14.7003	0.045	14.7002	2.9102	14.7003	0.3217	14.7003	1.58395
14.7085	0.10655	14.7087	1.0994	14.7083	0.8994	14.7087	0.0426	14.7085	2.85335	14.7087	0.3282	14.7087	1.6337
14.7168	0.1045	14.717	1.0436	14.7167	0.87395	14.717	0.043	14.7168	2.79075	14.717	0.3382	14.717	1.6744
14.7252	0.1043	14.7253	0.988	14.725	0.84575	14.7253	0.042	14.7252	2.72575	14.7253	0.345	14.7253	1.7084
14.7335	0.1048	14.7337	0.9335	14.7333	0.81655	14.7337	0.0411	14.7335	2.65555	14.7337	0.35055	14.7337	1.7329
14.7418	0.1061	14.742	0.8806	14.7417	0.78775	14.742	0.04085	14.7418	2.5816	14.742	0.35835	14.742	1.75145
14.7502	0.1039	14.7503	0.82945	14.75	0.7559	14.7503	0.0429	14.7502	2.5066	14.7503	0.36635	14.7503	1.75675
14.7585	0.10545	14.7587	0.7781	14.7583	0.7253	14.7587	0.044	14.7585	2.429	14.7587	0.3712	14.7587	1.7544
14.7668	0.10545	14.767	0.73225	14.7667	0.6969	14.767	0.0416	14.7668	2.3509	14.767	0.37445	14.767	1.7481
14.7752	0.1053	14.7753	0.6871	14.775	0.6667	14.7753	0.0409	14.7752	2.2704	14.7753	0.37415	14.7753	1.7334
14.7835	0.1034	14.7837	0.6419	14.7833	0.63525	14.7837	0.04435	14.7835	2.19005	14.7837	0.37885	14.7837	1.70965
14.7918	0.1033	14.792	0.6018	14.7917	0.6069	14.792	0.0463	14.7918	2.11185	14.792	0.3802	14.792	1.68535
14.8002	0.10455	14.8003	0.56515	14.8	0.58055	14.8003	0.0527	14.8002	2.03465	14.8003	0.3843	14.8003	1.6561
14.8085	0.1035	14.8087	0.5307	14.8083	0.55375	14.8087	0.0547	14.8085	1.95765	14.8087	0.3817	14.8087	1.62405
14.8168	0.1046	14.817	0.49475	14.8167	0.52795	14.817	0.05925	14.8168	1.8816	14.817	0.38305	14.817	1.5875
14.8252	0.1034	14.8253	0.4653	14.825	0.5058	14.8253	0.06685	14.8252	1.80795	14.8253	0.384	14.8253	1.5507
14.8335	0.1047	14.8337	0.4386	14.8333	0.48305	14.8337	0.07195	14.8335	1.7369	14.8337	0.38355	14.8337	1.5118
14.8418	0.10385	14.842	0.41375	14.8417	0.46165	14.842	0.0795	14.8418	1.66605	14.842	0.385	14.842	1.47155
14.8502	0.104	14.8503	0.3902	14.85	0.4439	14.8503	0.0871	14.8502	1.599	14.8503	0.3866	14.8503	1.43275
14.8585	0.10325	14.8587	0.36945	14.8583	0.42585	14.8587	0.0958	14.8585	1.53465	14.8587	0.38845	14.8587	1.394
14.8668	0.1024	14.867	0.34825	14.8667	0.40835	14.867	0.1056	14.8668	1.4713	14.867	0.392	14.867	1.35315
14.8752	0.103	14.8753	0.33115	14.875	0.39345	14.8753	0.1132	14.8752	1.4121	14.8753	0.3944	14.8753	1.31665
14.8835	0.1023	14.8837	0.3149	14.8833	0.3798	14.8837	0.1202	14.8835	1.35835	14.8837	0.4007	14.8837	1.27995
14.8918	0.10195	14.892	0.29925	14.8917	0.36735	14.892	0.1293	14.8918	1.30345	14.892	0.405	14.892	1.24225
14.9002	0.10225	14.9003	0.288	14.9	0.35655	14.9003	0.13835	14.9002	1.2553	14.9003	0.4089	14.9003	1.2079
14.9085	0.10275	14.9087	0.27625	14.9083	0.34775	14.9087	0.14965	14.9085	1.20775	14.9087	0.42025	14.9087	1.17565
14.9168	0.10125	14.917	0.26385	14.9167	0.33605	14.917	0.15825	14.9168	1.16385	14.917	0.42645	14.917	1.14275
14.9252	0.10025	14.9253	0.25475	14.925	0.32905	14.9253	0.16875	14.9252	1.1229	14.9253	0.43585	14.9253	1.1121
14.9335	0.10125	14.9337	0.2443	14.9333	0.32095	14.9337	0.17565	14.9335	1.0853	14.9337	0.4427	14.9337	1.0834
14.9418	0.1024	14.942	0.2375	14.9417	0.3154	14.942	0.18445	14.9418	1.05055	14.942	0.45455	14.942	1.0563
14.9502	0.1021	14.9503	0.22805	14.95	0.30945	14.9503	0.19335	14.9502	1.0187	14.9503	0.46735	14.9503	1.03105
14.9585	0.10145	14.9587	0.22145	14.9583	0.3032	14.9587	0.20325	14.9585	0.9871	14.9587	0.48075	14.9587	1.00505
14.9668	0.1012	14.967	0.21435	14.9667	0.29765	14.967	0.21375	14.9668	0.9582	14.967	0.49565	14.967	0.98315
14.9752	0.1015	14.9753	0.20725	14.975	0.2947	14.9753	0.2237	14.9752	0.93235	14.9753	0.51175	14.9753	0.96225
14.9835	0.1023	14.9837	0.2042	14.9833	0.2912	14.9837	0.23915	14.9835	0.90945	14.9837	0.5321	14.9837	0.94225
14.9918	0.10095	14.992	0.19955	14.9917	0.2853	14.992	0.25095	14.9918	0.88755	14.992	0.55025	14.992	0.92275
15.0002	0.1014	15.0003	0.19565	15	0.2838	15.0003	0.2668	15.0002	0.8681	15.0003	0.56985	15.0003	0.90635
15.0085	0.10085	15.0087	0.19155	15.0083	0.28115	15.0087	0.2826	15.0085	0.8506	15.0087	0.59065	15.0087	0.88975
15.0168	0.1013	15.017	0.1874	15.0167	0.27775	15.017	0.30225	15.0168	0.83215	15.017	0.61145	15.017	0.8729
15.0252	0.099	15.0253	0.1817	15.025	0.2727	15.0253	0.32515	15.0252	0.81565	15.0253	0.63155	15.0253	0.8568
15.0335	0.09835	15.0337	0.17875	15.0333	0.2713	15.0337	0.35105	15.0335	0.8018	15.0337	0.6506	15.0337	0.84265
15.0418	0.0999	15.042	0.1775	15.0417	0.27	15.042	0.3833	15.0418	0.78885	15.042	0.6737	15.042	0.83005
15.0502	0.09935	15.0503	0.17175	15.05	0.2689	15.0503	0.41415	15.0502	0.7748	15.0503	0.6861	15.0503	0.8164
15.0585	0.0982	15.0587	0.1705	15.0583	0.2654	15.0587	0.45025	15.0585	0.76525	15.0587	0.70025	15.0587	0.80315
15.0668	0.0993	15.067	0.16835	15.0667	0.2645	15.067	0.4833	15.0668	0.75415	15.067	0.71075	15.067	0.79205
15.0752	0.0998	15.0753	0.1653	15.075	0.26135	15.0753	0.5187	15.0752	0.7452	15.0753	0.71455	15.0753	0.78145
15.0835	0.0996	15.0837	0.16445	15.0833	0.26075	15.0837	0.55615	15.0835	0.73645	15.0837	0.71735	15.0837	0.77165
15.0918	0.0976	15.092	0.1611	15.0917	0.2588	15.092	0.587	15.0918	0.7268	15.092	0.7177	15.092	0.76005
15.1002	0.09775	15.1003	0.15715	15.1	0.2566	15.1003	0.61655	15.1002	0.7172	15.1003	0.70945	15.1003	0.7495
15.1085	0.09585	15.1087	0.1546	15.1083	0.2535	15.1087	0.6429	15.1085	0.7092	15.1087	0.69945	15.1087	0.7387
15.1168	0.0965	15.117	0.15485	15.1167	0.2542	15.117	0.65985	15.1168	0.7028	15.117	0.6864	15.117	0.73055
15.1252	0.0952	15.1253	0.15285	15.125	0.25275	15.1253	0.6737	15.1252	0.69805	15.1253	0.6684	15.1253	0.7196
15.1335	0.09495	15.1337	0.1514	15.1333	0.25215	15.1337	0.68405	15.1335	0.6926	15.1337	0.654	15.1337	0.71165
15.1418	0.09575	15.142	0.149	15.1417	0.2508	15.142	0.68775	15.1418	0.6859	15.142	0.63325	15.142	0.70305
15.1502	0.0953	15.1503	0.1463	15.15	0.2484	15.1503	0.6867	15.1502	0.68115	15.1503	0.6128	15.1503	0.69465
15.1585	0.09375	15.1587	0.14565	15.1583	0.24795	15.1587	0.6815	15.1585	0.677	15.1587	0.58855	15.1587	0.68705
15.1668	0.09275	15.167	0.14445	15.1667	0.2469	15.167	0.66905	15.1668	0.6718	15.167	0.56585	15.167	0.6777
15.1752	0.09425	15.1753	0.14515	15.175	0.24725	15.1753	0.65575	15.1752	0.66915	15.1753	0.5409	15.1753	0.67075
15.1835	0.09305	15.1837	0.14245	15.1833	0.243	15.1837	0.6367	15.1835	0.66545	15.1837	0.51405	15.1837	0.6633
15.1918	0.09475	15.192	0.1425	15.1917	0.24595	15.192	0.61715	15.1918	0.6638	15.192	0.48985	15.192	0.6595
15.2002	0.0918	15.2003	0.13825	15.2	0.24235	15.2003	0.59395	15.2002	0.65815	15.2003	0.46545	15.2003	0.64945
15.2085	0.09395	15.2087	0.1379	15.2083	0.24215	15.2087	0.56915	15.2085	0.6565	15.2087	0.44145	15.2087	0.6439
15.2168	0.09105	15.217	0.13655	15.2167	0.239	15.217	0.5432	15.2168	0.65355	15.217	0.4196	15.217	0.6363
15.2252	0.0923	15.2253	0.13485	15.225	0.24015	15.2253	0.51765	15.2252	0.6509	15.2253	0.3975	15.2253	0.62985
15.2335	0.09265	15.2337	0.1337	15.2333	0.2381	15.2337	0.48825	15.2335	0.6499	15.2337	0.37775	15.2337	0.62475
15.2418	0.0928	15.242	0.1343	15.2417	0.2374	15.242	0.46125	15.2418	0.64785	15.242	0.35725	15.242	0.62005
15.2502	0.09045	15.2503	0.1316	15.25	0.23525	15.2503	0.434	15.2502	0.64405	15.2503	0.3415	15.2503	0.6131
15.2585	0.09225	15.2587	0.13255	15.2583	0.2369	15.2587	0.4071	15.2585	0.6462	15.2587	0.325	15.2587	0.6087
15.2668	0.09065	15.267	0.1295	15.2667	0.23365	15.267	0.3806	15.2668	0.64205	15.267	0.30955	15.267	0.59985
15.2752	0.08955	15.2753	0.1287	15.275	0.23425	15.2753	0.35385	15.2752	0.6403	15.2753	0.2947	15.2753	0.5946
15.2835	0.08925	15.2837	0.12755	15.2833	0.23315	15.2837	0.3291	15.2835	0.63965	15.2837	0.2814	15.2837	0.5896
15.2918	0.0899	15.292	0.1263	15.2917	0.2315	15.292	0.30415	15.2918	0.63825	15.292	0.267	15.292	0.5845
15.3002	0.08765	15.3003	0.12455	15.3	0.2299	15.3003	0.2799	15.3002	0.63595	15.3003	0.2537	15.3003	0.57865
15.3085	0.0891	15.3087	0.12655	15.3083	0.23035	15.3087	0.2586	15.3085	0.63595	15.3087	0.2426	15.3087	0.5749
15.3168	0.08795	15.317	0.12295	15.3167	0.22605	15.317	0.2359	15.3168	0.6343	15.317	0.2339	15.317	0.56835
15.3252	0.08965	15.3253	0.12395	15.325	0.2275	15.3253	0.21455	15.3252	0.63485	15.3253	0.2245	15.3253	0.56375
15.3335	0.08805	15.3337	0.1217	15.3333	0.22685	15.3337	0.19515	15.3335	0.63255	15.3337	0.2155	15.3337	0.55815
15.3418	0.0874	15.342	0.121	15.3417	0.2245	15.342	0.1758	15.3418	0.63095	15.342	0.2085	15.342	0.55405
15.3502	0.0854	15.3503	0.1196	15.35	0.22365	15.3503	0.1617	15.3502	0.62875	15.3503	0.2022	15.3503	0.54815
15.3585	0.08695	15.3587	0.12185	15.3583	0.22575	15.3587	0.1477	15.3585	0.63035	15.3587	0.19775	15.3587	0.54675
15.3668	0.0863	15.367	0.1202	15.3667	0.22355	15.367	0.13475	15.3668	0.62745	15.367	0.1893	15.367	0.541
15.3752	0.08485	15.3753	0.1179	15.375	0.2219	15.3753	0.1225	15.3752	0.6257	15.3753	0.1847	15.3753	0.5343
15.3835	0.0856	15.3837	0.11865	15.3833	0.22145	15.3837	0.10955	15.3835	0.62305	15.3837	0.1792	15.3837	0.53025
15.3918	0.0841	15.392	0.11645	15.3917	0.22035	15.392	0.10045	15.3918	0.622	15.392	0.17555	15.392	0.5255
15.4002	0.08375	15.4003	0.11635	15.4	0.22055	15.4003	0.09095	15.4002	0.6216	15.4003	0.17115	15.4003	0.52215
15.4085	0.08385	15.4087	0.1163	15.4083	0.2186	15.4087	0.0816	15.4085	0.6203	15.4087	0.1685	15.4087	0.51735
15.4168	0.0836	15.417	0.1138	15.4167	0.21615	15.417	0.07225	15.4168	0.61795	15.417	0.16485	15.417	0.51355
15.4252	0.08295	15.4253	0.11495	15.425	0.2173	15.4253	0.0675	15.4252	0.6159	15.4253	0.16095	15.4253	0.50975
15.4335	0.0825	15.4337	0.11225	15.4333	0.21555	15.4337	0.06265	15.4335	0.61475	15.4337	0.16115	15.4337	0.5049
15.4418	0.0822	15.442	0.11115	15.4417	0.21305	15.442	0.05355	15.4418	0.6108	15.442	0.1575	15.442	0.50045
15.4502	0.08055	15.4503	0.11035	15.45	0.21275	15.4503	0.0476	15.4502	0.61085	15.4503	0.1545	15.4503	0.49665
15.4585	0.08005	15.4587	0.11145	15.4583	0.21175	15.4587	0.0417	15.4585	0.6076	15.4587	0.1521	15.4587	0.4929
15.4668	0.0795	15.467	0.1079	15.4667	0.2105	15.467	0.0362	15.4668	0.6066	15.467	0.1507	15.467	0.4876
15.4752	0.0784	15.4753	0.10625	15.475	0.2089	15.4753	0.03165	15.4752	0.6041	15.4753	0.1471	15.4753	0.4849
15.4835	0.07905	15.4837	0.10895	15.4833	0.2091	15.4837	0.0292	15.4835	0.60415	15.4837	0.1435	15.4837	0.48185
15.4918	0.07775	15.492	0.1074	15.4917	0.20675	15.492	0.02365	15.4918	0.60125	15.492	0.1412	15.492	0.4775
15.5002	0.07785	15.5003	0.10635	15.5	0.20595	15.5003	0.02095	15.5002	0.59965	15.5003	0.1386	15.5003	0.473
15.5085	0.0771	15.5087	0.1059	15.5083	0.20525	15.5087	0.01455	15.5085	0.59915	15.5087	0.1358	15.5087	0.4701
15.5168	0.07725	15.517	0.1054	15.5167	0.20495	15.517	0.01285	15.5168	0.59805	15.517	0.1346	15.517	0.46605
15.5252	0.07525	15.5253	0.10355	15.525	0.20355	15.5253	0.00735	15.5252	0.59595	15.5253	0.1319	15.5253	0.46155
15.5335	0.0776	15.5337	0.1044	15.5333	0.20265	15.5337	0.0039	15.5335	0.59445	15.5337	0.12905	15.5337	0.4612
15.5418	0.0753	15.542	0.1035	15.5417	0.20145	15.542	0.0055	15.5418	0.59195	15.542	0.1277	15.542	0.45805
15.5502	0.07615	15.5503	0.10305	15.55	0.20015	15.5503	-0.00065	15.5502	0.59075	15.5503	0.12485	15.5503	0.4548
15.5585	0.0754	15.5587	0.10335	15.5583	0.1998	15.5587	0.00055	15.5585	0.58755	15.5587	0.12355	15.5587	0.45055
15.5668	0.07495	15.567	0.10065	15.5667	0.19885	15.567	-0.0033	15.5668	0.5854	15.567	0.1218	15.567	0.4474
15.5752	0.0754	15.5753	0.10135	15.575	0.1978	15.5753	-0.00655	15.5752	0.58505	15.5753	0.11725	15.5753	0.4455
15.5835	0.0749	15.5837	0.1007	15.5833	0.19795	15.5837	-0.0077	15.5835	0.58285	15.5837	0.1156	15.5837	0.44455
15.5918	0.0738	15.592	0.09895	15.5917	0.19715	15.592	-0.00725	15.5918	0.5805	15.592	0.11515	15.592	0.4405
15.6002	0.0725	15.6003	0.09905	15.6	0.19635	15.6003	-0.0101	15.6002	0.57815	15.6003	0.11415	15.6003	0.43725
15.6085	0.0744	15.6087	0.10035	15.6083	0.197	15.6087	-0.0111	15.6085	0.57785	15.6087	0.11245	15.6087	0.43545
15.6168	0.0717	15.617	0.09745	15.6167	0.1956	15.617	-0.0117	15.6168	0.57225	15.617	0.11045	15.617	0.4316
15.6252	0.0725	15.6253	0.098	15.625	0.1953	15.6253	-0.01525	15.6252	0.5708	15.6253	0.108	15.6253	0.4302
15.6335	0.07155	15.6337	0.09525	15.6333	0.19325	15.6337	-0.01775	15.6335	0.5694	15.6337	0.10805	15.6337	0.4275
15.6418	0.07355	15.642	0.09535	15.6417	0.19435	15.642	-0.0201	15.6418	0.5676	15.642	0.1033	15.642	0.42435
15.6502	0.0733	15.6503	0.0946	15.65	0.19445	15.6503	-0.0225	15.6502	0.5642	15.6503	0.10075	15.6503	0.42295
15.6585	0.0701	15.6587	0.09205	15.6583	0.19545	15.6587	-0.0217	15.6585	0.56055	15.6587	0.1011	15.6587	0.42015
15.6668	0.07	15.667	0.0909	15.6667	0.1956	15.667	-0.02355	15.6668	0.55815	15.667	0.0974	15.667	0.41745
15.6752	0.0717	15.6753	0.09165	15.675	0.1988	15.6753	-0.02385	15.6752	0.55805	15.6753	0.09545	15.6753	0.4163
15.6835	0.07315	15.6837	0.0924	15.6833	0.20195	15.6837	-0.02515	15.6835	0.55595	15.6837	0.0921	15.6837	0.41505
15.6918	0.07145	15.692	0.0907	15.6917	0.20175	15.692	-0.02755	15.6918	0.55395	15.692	0.092	15.692	0.4119
15.7002	0.07185	15.7003	0.09045	15.7	0.2082	15.7003	-0.0306	15.7002	0.55245	15.7003	0.08995	15.7003	0.41175
15.7085	0.0715	15.7087	0.09005	15.7083	0.21145	15.7087	-0.0328	15.7085	0.55025	15.7087	0.08555	15.7087	0.4097
15.7168	0.07145	15.717	0.08875	15.7167	0.2198	15.717	-0.0352	15.7168	0.5502	15.717	0.08565	15.717	0.40955
15.7252	0.0703	15.7253	0.0868	15.725	0.22625	15.7253	-0.03725	15.7252	0.54735	15.7253	0.08245	15.7253	0.4049
15.7335	0.0691	15.7337	0.0866	15.7333	0.23595	15.7337	-0.0376	15.7335	0.54665	15.7337	0.08235	15.7337	0.40395
15.7418	0.0691	15.742	0.08525	15.7417	0.2481	15.742	-0.04005	15.7418	0.54515	15.742	0.0786	15.742	0.4032
15.7502	0.0682	15.7503	0.08455	15.75	0.2626	15.7503	-0.04075	15.7502	0.54665	15.7503	0.0766	15.7503	0.39985
15.7585	0.0677	15.7587	0.08455	15.7583	0.27935	15.7587	-0.0423	15.7585	0.5451	15.7587	0.07535	15.7587	0.39925
15.7668	0.06755	15.767	0.08325	15.7667	0.30085	15.767	-0.0445	15.7668	0.5464	15.767	0.07335	15.767	0.3991
15.7752	0.0676	15.7753	0.0814	15.775	0.3236	15.7753	-0.04865	15.7752	0.5488	15.7753	0.0697	15.7753	0.39535
15.7835	0.0677	15.7837	0.0826	15.7833	0.34895	15.7837	-0.0467	15.7835	0.5545	15.7837	0.0729	15.7837	0.39545
15.7918	0.06695	15.792	0.0814	15.7917	0.37445	15.792	-0.04705	15.7918	0.56075	15.792	0.07195	15.792	0.3976
15.8002	0.06855	15.8003	0.0821	15.8	0.4025	15.8003	-0.05035	15.8002	0.56775	15.8003	0.06845	15.8003	0.3984
15.8085	0.06695	15.8087	0.0807	15.8083	0.4315	15.8087	-0.05145	15.8085	0.57835	15.8087	0.0677	15.8087	0.39985
15.8168	0.06645	15.817	0.0802	15.8167	0.459	15.817	-0.0529	15.8168	0.58825	15.817	0.0693	15.817	0.3993
15.8252	0.0656	15.8253	0.0807	15.825	0.48805	15.8253	-0.0526	15.8252	0.6056	15.8253	0.067	15.8253	0.4022
15.8335	0.06615	15.8337	0.07965	15.8333	0.51405	15.8337	-0.05395	15.8335	0.62275	15.8337	0.06555	15.8337	0.4039
15.8418	0.0668	15.842	0.08015	15.8417	0.5417	15.842	-0.0565	15.8418	0.64175	15.842	0.0633	15.842	0.4073
15.8502	0.0655	15.8503	0.0798	15.85	0.56495	15.8503	-0.0558	15.8502	0.66375	15.8503	0.06285	15.8503	0.4105
15.8585	0.0661	15.8587	0.081	15.8583	0.58645	15.8587	-0.0576	15.8585	0.68685	15.8587	0.06115	15.8587	0.4151
15.8668	0.06555	15.867	0.0831	15.8667	0.60765	15.867	-0.05755	15.8668	0.7118	15.867	0.0597	15.867	0.4223
15.8752	0.0662	15.8753	0.0855	15.875	0.62515	15.8753	-0.06075	15.8752	0.73705	15.8753	0.05925	15.8753	0.42795
15.8835	0.0665	15.8837	0.08645	15.8833	0.63865	15.8837	-0.0614	15.8835	0.76125	15.8837	0.06045	15.8837	0.43335
15.8918	0.0667	15.892	0.0895	15.8917	0.65205	15.892	-0.06215	15.8918	0.7848	15.892	0.056	15.892	0.4417
15.9002	0.0645	15.9003	0.0917	15.9	0.6608	15.9003	-0.06235	15.9002	0.80775	15.9003	0.0572	15.9003	0.44825
15.9085	0.06515	15.9087	0.09445	15.9083	0.6699	15.9087	-0.0645	15.9085	0.8269	15.9087	0.055	15.9087	0.4553
15.9168	0.0654	15.917	0.1009	15.9167	0.6775	15.917	-0.06435	15.9168	0.84585	15.917	0.05365	15.917	0.4638
15.9252	0.0656	15.9253	0.1043	15.925	0.6816	15.9253	-0.0637	15.9252	0.86165	15.9253	0.05505	15.9253	0.47095
15.9335	0.0655	15.9337	0.1111	15.9333	0.68625	15.9337	-0.0643	15.9335	0.8743	15.9337	0.05245	15.9337	0.47865
15.9418	0.0646	15.942	0.11405	15.9417	0.6879	15.942	-0.0658	15.9418	0.8847	15.942	0.0513	15.942	0.48445
15.9502	0.06635	15.9503	0.1202	15.95	0.69215	15.9503	-0.06555	15.9502	0.89455	15.9503	0.0522	15.9503	0.49305
15.9585	0.0663	15.9587	0.127	15.9583	0.69425	15.9587	-0.0669	15.9585	0.9019	15.9587	0.04935	15.9587	0.4985
15.9668	0.06585	15.967	0.13295	15.9667	0.69675	15.967	-0.06475	15.9668	0.9073	15.967	0.05045	15.967	0.50455
15.9752	0.06535	15.9753	0.1378	15.975	0.70015	15.9753	-0.0661	15.9752	0.91155	15.9753	0.05225	15.9753	0.50955
15.9835	0.0665	15.9837	0.1456	15.9833	0.704	15.9837	-0.0647	15.9835	0.9167	15.9837	0.0522	15.9837	0.51595
15.9918	0.0663	15.992	0.1521	15.9917	0.70805	15.992	-0.0634	15.9918	0.91735	15.992	0.05525	15.992	0.5193
16.0002	0.06515	16.0003	0.15945	16	0.7124	16.0003	-0.06595	16.0002	0.9167	16.0003	0.0573	16.0003	0.52165
16.0085	0.06535	16.0087	0.16825	16.0083	0.7214	16.0087	-0.0638	16.0085	0.91975	16.0087	0.0588	16.0087	0.5265
16.0168	0.0653	16.017	0.1776	16.0167	0.72905	16.017	-0.0684	16.0168	0.92155	16.017	0.06065	16.017	0.5301
16.0252	0.0657	16.0253	0.1882	16.025	0.74115	16.0253	-0.0652	16.0252	0.92175	16.0253	0.0674	16.0253	0.53255
16.0335	0.06725	16.0337	0.19985	16.0333	0.75315	16.0337	-0.06755	16.0335	0.92395	16.0337	0.0738	16.0337	0.53835
16.0418	0.06645	16.042	0.2133	16.0417	0.76785	16.042	-0.0683	16.0418	0.92405	16.042	0.07935	16.042	0.5407
16.0502	0.06555	16.0503	0.2277	16.05	0.78645	16.0503	-0.0672	16.0502	0.9252	16.0503	0.0898	16.0503	0.5452
16.0585	0.0649	16.0587	0.2428	16.0583	0.80475	16.0587	-0.0668	16.0585	0.92405	16.0587	0.10025	16.0587	0.54755
16.0668	0.0666	16.067	0.26385	16.0667	0.82805	16.067	-0.06855	16.0668	0.9261	16.067	0.1107	16.067	0.5506
16.0752	0.0679	16.0753	0.28725	16.075	0.85675	16.0753	-0.069	16.0752	0.92895	16.0753	0.12245	16.0753	0.5577
16.0835	0.06845	16.0837	0.31285	16.0833	0.8879	16.0837	-0.07025	16.0835	0.93275	16.0837	0.135	16.0837	0.56435
16.0918	0.0696	16.092	0.343	16.0917	0.92035	16.092	-0.0715	16.0918	0.9391	16.092	0.1493	16.092	0.57385
16.1002	0.07215	16.1003	0.3781	16.1	0.9605	16.1003	-0.0701	16.1002	0.9502	16.1003	0.1648	16.1003	0.5863
16.1085	0.0742	16.1087	0.41515	16.1083	1.00415	16.1087	-0.06935	16.1085	0.9658	16.1087	0.17995	16.1087	0.59865
16.1168	0.0773	16.117	0.45705	16.1167	1.05335	16.117	-0.06835	16.1168	0.98695	16.117	0.19355	16.117	0.6154
16.1252	0.08125	16.1253	0.50155	16.125	1.1051	16.1253	-0.0703	16.1252	1.01705	16.1253	0.205	16.1253	0.6353
16.1335	0.08655	16.1337	0.55075	16.1333	1.16575	16.1337	-0.07095	16.1335	1.0532	16.1337	0.21505	16.1337	0.65865
16.1418	0.09175	16.142	0.6022	16.1417	1.22835	16.142	-0.0707	16.1418	1.09945	16.142	0.22695	16.142	0.688
16.1502	0.09925	16.1503	0.6539	16.15	1.29245	16.1503	-0.0705	16.1502	1.1509	16.1503	0.2377	16.1503	0.7178
16.1585	0.1072	16.1587	0.70805	16.1583	1.35955	16.1587	-0.0717	16.1585	1.21585	16.1587	0.2462	16.1587	0.75475
16.1668	0.12015	16.167	0.76235	16.1667	1.4284	16.167	-0.06905	16.1668	1.28955	16.167	0.2549	16.167	0.79725
16.1752	0.1349	16.1753	0.81735	16.175	1.49955	16.1753	-0.07005	16.1752	1.3747	16.1753	0.26085	16.1753	0.84695
16.1835	0.1513	16.1837	0.86995	16.1833	1.56805	16.1837	-0.0692	16.1835	1.4688	16.1837	0.2682	16.1837	0.9012
16.1918	0.1716	16.192	0.91975	16.1917	1.63475	16.192	-0.0708	16.1918	1.57195	16.192	0.27265	16.192	0.95935
16.2002	0.1959	16.2003	0.96465	16.2	1.6987	16.2003	-0.0698	16.2002	1.68535	16.2003	0.27665	16.2003	1.02445
16.2085	0.2234	16.2087	1.0038	16.2083	1.7576	16.2087	-0.06845	16.2085	1.80505	16.2087	0.2773	16.2087	1.0942
16.2168	0.2544	16.217	1.03715	16.2167	1.8101	16.217	-0.0692	16.2168	1.92975	16.217	0.28015	16.217	1.1661
16.2252	0.29205	16.2253	1.06385	16.225	1.85655	16.2253	-0.06895	16.2252	2.06155	16.2253	0.2808	16.2253	1.24125
16.2335	0.3333	16.2337	1.08395	16.2333	1.897	16.2337	-0.06545	16.2335	2.197	16.2337	0.28225	16.2337	1.31995
16.2418	0.37855	16.242	1.09635	16.2417	1.92725	16.242	-0.0666	16.2418	2.33095	16.242	0.28125	16.242	1.3984
16.2502	0.42955	16.2503	1.09925	16.25	1.94905	16.2503	-0.0654	16.2502	2.4663	16.2503	0.27995	16.2503	1.4784
16.2585	0.48415	16.2587	1.09415	16.2583	1.96375	16.2587	-0.06325	16.2585	2.5986	16.2587	0.27885	16.2587	1.5572
16.2668	0.5433	16.267	1.0806	16.2667	1.96755	16.267	-0.06115	16.2668	2.7253	16.267	0.2768	16.267	1.6332
16.2752	0.6074	16.2753	1.0611	16.275	1.9643	16.2753	-0.06035	16.2752	2.84385	16.2753	0.2722	16.2753	1.7067
16.2835	0.67205	16.2837	1.03275	16.2833	1.947	16.2837	-0.0578	16.2835	2.9504	16.2837	0.2704	16.2837	1.7731
16.2918	0.74015	16.292	1.0002	16.2917	1.9265	16.292	-0.0536	16.2918	3.04685	16.292	0.26625	16.292	1.83875
16.3002	0.8092	16.3003	0.9636	16.3	1.89165	16.3003	-0.0522	16.3002	3.13	16.3003	0.262	16.3003	1.8956
16.3085	0.87735	16.3087	0.92145	16.3083	1.8522	16.3087	-0.04755	16.3085	3.19715	16.3087	0.25885	16.3087	1.944
16.3168	0.9441	16.317	0.8741	16.3167	1.8027	16.317	-0.04435	16.3168	3.247	16.317	0.25465	16.317	1.9839
16.3252	1.0099	16.3253	0.825	16.325	1.7476	16.3253	-0.0382	16.3252	3.28055	16.3253	0.25255	16.3253	2.01625
16.3335	1.071	16.3337	0.7715	16.3333	1.68385	16.3337	-0.03515	16.3335	3.29365	16.3337	0.2502	16.3337	2.03735
16.3418	1.1324	16.342	0.72375	16.3417	1.6198	16.342	-0.03105	16.3418	3.29305	16.342	0.24825	16.342	2.05165
16.3502	1.18515	16.3503	0.6685	16.35	1.5491	16.3503	-0.026	16.3502	3.27395	16.3503	0.2475	16.3503	2.05515
16.3585	1.2339	16.3587	0.619	16.3583	1.47675	16.3587	-0.0222	16.3585	3.23735	16.3587	0.24495	16.3587	2.04875
16.3668	1.27445	16.367	0.5684	16.3667	1.4018	16.367	-0.01615	16.3668	3.1843	16.367	0.2453	16.367	2.0322
16.3752	1.31135	16.3753	0.52245	16.375	1.3264	16.3753	-0.0128	16.3752	3.1169	16.3753	0.2445	16.3753	2.00915
16.3835	1.338	16.3837	0.4772	16.3833	1.25215	16.3837	-0.00795	16.3835	3.036	16.3837	0.24325	16.3837	1.977
16.3918	1.3592	16.392	0.4358	16.3917	1.1777	16.392	-0.0045	16.3918	2.9458	16.392	0.2445	16.392	1.9347
16.4002	1.3701	16.4003	0.3973	16.4	1.1064	16.4003	-0.00045	16.4002	2.8438	16.4003	0.2452	16.4003	1.8861
16.4085	1.3727	16.4087	0.36375	16.4083	1.0371	16.4087	0.0042	16.4085	2.7359	16.4087	0.2478	16.4087	1.831
16.4168	1.36835	16.417	0.33095	16.4167	0.9714	16.417	0.00895	16.4168	2.6212	16.417	0.2479	16.417	1.76965
16.4252	1.35295	16.4253	0.30015	16.425	0.9082	16.4253	0.01405	16.4252	2.50265	16.4253	0.2494	16.4253	1.702
16.4335	1.3304	16.4337	0.2736	16.4333	0.8478	16.4337	0.0163	16.4335	2.37955	16.4337	0.2532	16.4337	1.6323
16.4418	1.3011	16.442	0.2506	16.4417	0.79385	16.442	0.017	16.4418	2.2595	16.442	0.25585	16.442	1.5585
16.4502	1.26705	16.4503	0.2307	16.45	0.7437	16.4503	0.01995	16.4502	2.1401	16.4503	0.2625	16.4503	1.485
16.4585	1.22115	16.4587	0.21095	16.4583	0.6944	16.4587	0.02435	16.4585	2.02125	16.4587	0.26905	16.4587	1.4082
16.4668	1.17455	16.467	0.19625	16.4667	0.65305	16.467	0.02885	16.4668	1.9085	16.467	0.2779	16.467	1.3343
16.4752	1.12205	16.4753	0.18255	16.475	0.6155	16.4753	0.03205	16.4752	1.80015	16.4753	0.28865	16.4753	1.26235
16.4835	1.06595	16.4837	0.16965	16.4833	0.5787	16.4837	0.0369	16.4835	1.6955	16.4837	0.3045	16.4837	1.1885
16.4918	1.00615	16.492	0.15905	16.4917	0.5473	16.492	0.0407	16.4918	1.6002	16.492	0.3199	16.492	1.1178
16.5002	0.94465	16.5003	0.1505	16.5	0.5184	16.5003	0.0479	16.5002	1.5107	16.5003	0.34335	16.5003	1.0519
16.5085	0.88445	16.5087	0.1446	16.5083	0.4932	16.5087	0.05105	16.5085	1.42725	16.5087	0.3694	16.5087	0.98895
16.5168	0.8208	16.517	0.1354	16.5167	0.46975	16.517	0.059	16.5168	1.35035	16.517	0.4028	16.517	0.92985
16.5252	0.76025	16.5253	0.1278	16.525	0.44855	16.5253	0.0675	16.5252	1.279	16.5253	0.44085	16.5253	0.8725
16.5335	0.69975	16.5337	0.12155	16.5333	0.4296	16.5337	0.0791	16.5335	1.21585	16.5337	0.48835	16.5337	0.8219
16.5418	0.64405	16.542	0.1182	16.5417	0.4164	16.542	0.093	16.5418	1.15925	16.542	0.54555	16.542	0.7761
16.5502	0.5883	16.5503	0.1141	16.55	0.3997	16.5503	0.11045	16.5502	1.1061	16.5503	0.6079	16.5503	0.733
16.5585	0.53545	16.5587	0.111	16.5583	0.38685	16.5587	0.13005	16.5585	1.05835	16.5587	0.6805	16.5587	0.69465
16.5668	0.48665	16.567	0.10725	16.5667	0.377	16.567	0.15105	16.5668	1.01625	16.567	0.76065	16.567	0.6626
16.5752	0.43995	16.5753	0.104	16.575	0.3642	16.5753	0.17975	16.5752	0.974	16.5753	0.8484	16.5753	0.62995
16.5835	0.4005	16.5837	0.10175	16.5833	0.3553	16.5837	0.2138	16.5835	0.93835	16.5837	0.94515	16.5837	0.60245
16.5918	0.3621	16.592	0.0983	16.5917	0.34725	16.592	0.253	16.5918	0.9023	16.592	1.05285	16.592	0.57945
16.6002	0.32955	16.6003	0.0964	16.6	0.3404	16.6003	0.3002	16.6002	0.87265	16.6003	1.1654	16.6003	0.55855
16.6085	0.2976	16.6087	0.09195	16.6083	0.3319	16.6087	0.3548	16.6085	0.8428	16.6087	1.28685	16.6087	0.5385
16.6168	0.27155	16.617	0.08985	16.6167	0.3259	16.617	0.41255	16.6168	0.8161	16.617	1.4093	16.617	0.52155
16.6252	0.2473	16.6253	0.088	16.625	0.32	16.6253	0.4794	16.6252	0.79115	16.6253	1.5337	16.6253	0.5071
16.6335	0.2273	16.6337	0.0875	16.6333	0.31555	16.6337	0.5537	16.6335	0.7708	16.6337	1.6635	16.6337	0.49345
[truncated: 4,604 more rows]
