# Supplementary material for: A moonlighting function of a chitin polysaccharide monooxygenase, CWR-1, in Neurospora crassa allorecognition
Source: eLife. 2022 Aug 30;11:e80459. doi: 10.7554/eLife.80459 (PMC9550227; doi:10.7554/eLife.80459)
Supplement: Figure 5—source data 2. — Blank subtracted HPAEC-PAD traces. The samples were prepared as described in ‘Materials and methods.’ The time and nC response are listed in the table. [file elife-80459-fig5-data2.xlsx]

## Sheet: Sheet1
Figure 5B Source Data (HG6 and Variants on β-Chitin)
β-Chitin		β-Chitin + Asc.		HG6		HG6 H20A		HG6 H79A		HG6 H20AH79A
time	nC	time	nC	time	nC	time	nC	time	nC	time	nC
0.000167	0.04	0.000333	-0.0953	0.000333	-0.1535	0.000167	-0.014	0	0.0294	0.000333	0.005
0.0085	0.0516	0.008667	-0.0675	0.008667	-0.14575	0.0085	-0.02345	0.008333	0.03605	0.008667	0.0088
0.016833	0.0469	0.017	-0.06275	0.017	-0.14445	0.016833	-0.01585	0.016667	0.02675	0.017	0.01245
0.025167	0.0473	0.025333	-0.0622	0.025333	-0.14415	0.025167	-0.01095	0.025	0.02515	0.025333	0.0168
0.0335	0.0491	0.033667	-0.06385	0.033667	-0.14715	0.0335	-0.0073	0.033333	0.0233	0.033667	0.01955
0.041833	0.04945	0.042	-0.0655	0.042	-0.14735	0.041833	-0.0045	0.041667	0.024	0.042	0.0202
0.050167	0.0515	0.050333	-0.06565	0.050333	-0.14585	0.050167	-0.00365	0.05	0.02435	0.050333	0.02095
0.0585	0.0511	0.058667	-0.06675	0.058667	-0.14595	0.0585	-0.0032	0.058333	0.0234	0.058667	0.0224
0.066833	0.0507	0.067	-0.0682	0.067	-0.14595	0.066833	-0.0033	0.066667	0.0226	0.067	0.02165
0.075167	0.0496	0.075333	-0.0702	0.075333	-0.14625	0.075167	-0.00485	0.075	0.0226	0.075333	0.0201
0.0835	0.0493	0.083667	-0.0697	0.083667	-0.14585	0.0835	-0.0039	0.083333	0.02295	0.083667	0.02085
0.091833	0.0482	0.092	-0.0711	0.092	-0.148	0.091833	-0.0035	0.091667	0.0214	0.092	0.02225
0.100167	0.0494	0.100333	-0.0718	0.100333	-0.14815	0.100167	-0.00415	0.1	0.0197	0.100333	0.02175
0.1085	0.04975	0.108667	-0.07395	0.108667	-0.15075	0.1085	-0.00435	0.108333	0.0185	0.108667	0.0204
0.116833	0.0493	0.117	-0.07475	0.117	-0.1497	0.116833	-0.00585	0.116667	0.0181	0.117	0.02115
0.125167	0.0487	0.125333	-0.0778	0.125333	-0.1512	0.125167	-0.0036	0.125	0.01615	0.125333	0.01885
0.1335	0.0474	0.133667	-0.0794	0.133667	-0.1528	0.1335	-0.00505	0.133333	0.01585	0.133667	0.01775
0.141833	0.04705	0.142	-0.08045	0.142	-0.1529	0.141833	-0.0036	0.141667	0.0135	0.142	0.01615
0.150167	0.04925	0.150333	-0.0794	0.150333	-0.1512	0.150167	-0.00575	0.15	0.0133	0.150333	0.0175
0.1585	0.05085	0.158667	-0.0785	0.158667	-0.1489	0.1585	-0.00435	0.158333	0.0136	0.158667	0.0196
0.166833	0.04925	0.167	-0.0784	0.167	-0.1504	0.166833	-0.00235	0.166667	0.01275	0.167	0.01925
0.175167	0.0481	0.175333	-0.07855	0.175333	-0.14905	0.175167	-0.00585	0.175	0.0115	0.175333	0.0198
0.1835	0.0477	0.183667	-0.0812	0.183667	-0.1469	0.1835	-0.00495	0.183333	0.01035	0.183667	0.01875
0.191833	0.04875	0.192	-0.08225	0.192	-0.15235	0.191833	-0.00575	0.191667	0.01015	0.192	0.0197
0.200167	0.0505	0.200333	-0.08085	0.200333	-0.15315	0.200167	-0.0055	0.2	0.0109	0.200333	0.0208
0.2085	0.04825	0.208667	-0.0812	0.208667	-0.15195	0.2085	-0.00575	0.208333	0.0109	0.208667	0.02105
0.216833	0.0485	0.217	-0.082	0.217	-0.1531	0.216833	-0.00565	0.216667	0.0103	0.217	0.02055
0.225167	0.04995	0.225333	-0.08215	0.225333	-0.1534	0.225167	-0.007	0.225	0.01015	0.225333	0.0205
0.2335	0.0501	0.233667	-0.08255	0.233667	-0.1512	0.2335	-0.0063	0.233333	0.01135	0.233667	0.0218
0.241833	0.05005	0.242	-0.0826	0.242	-0.15025	0.241833	-0.00475	0.241667	0.0107	0.242	0.0226
0.250167	0.0509	0.250333	-0.0823	0.250333	-0.15085	0.250167	-0.0046	0.25	0.0088	0.250333	0.02295
0.2585	0.0505	0.258667	-0.0819	0.258667	-0.14805	0.2585	-0.0054	0.258333	0.0099	0.258667	0.02255
0.266833	0.0506	0.267	-0.08015	0.267	-0.14795	0.266833	-0.00325	0.266667	0.01005	0.267	0.0238
0.275167	0.04845	0.275333	-0.0831	0.275333	-0.14865	0.275167	-0.0044	0.275	0.00965	0.275333	0.02255
0.2835	0.04935	0.283667	-0.08385	0.283667	-0.1499	0.2835	-0.00305	0.283333	0.00915	0.283667	0.0237
0.291833	0.04825	0.292	-0.08345	0.292	-0.14975	0.291833	-0.00255	0.291667	0.0086	0.292	0.024
0.300167	0.048	0.300333	-0.08195	0.300333	-0.1504	0.300167	-0.005	0.3	0.01045	0.300333	0.024
0.3085	0.04855	0.308667	-0.08195	0.308667	-0.1483	0.3085	-0.00345	0.308333	0.0107	0.308667	0.02415
0.316833	0.04605	0.317	-0.08615	0.317	-0.151	0.316833	-0.00345	0.316667	0.0076	0.317	0.0198
0.325167	0.04615	0.325333	-0.08625	0.325333	-0.1504	0.325167	-0.0036	0.325	0.00835	0.325333	0.02055
0.3335	0.0475	0.333667	-0.0844	0.333667	-0.15025	0.3335	-0.0036	0.333333	0.009	0.333667	0.02085
0.341833	0.04895	0.342	-0.08495	0.342	-0.1477	0.341833	-0.00285	0.341667	0.00855	0.342	0.0223
0.350167	0.04825	0.350333	-0.08435	0.350333	-0.14885	0.350167	-0.003	0.35	0.0091	0.350333	0.02205
0.3585	0.0474	0.358667	-0.08495	0.358667	-0.14845	0.3585	-0.00405	0.358333	0.0085	0.358667	0.02225
0.366833	0.0486	0.367	-0.0849	0.367	-0.1453	0.366833	-0.00475	0.366667	0.0093	0.367	0.0231
0.375167	0.04975	0.375333	-0.0852	0.375333	-0.1467	0.375167	-0.00495	0.375	0.0088	0.375333	0.0233
0.3835	0.0495	0.383667	-0.08575	0.383667	-0.1501	0.3835	-0.00435	0.383333	0.00715	0.383667	0.02295
0.391833	0.05015	0.392	-0.08505	0.392	-0.1506	0.391833	-0.0043	0.391667	0.0094	0.392	0.0244
0.400167	0.04895	0.400333	-0.0857	0.400333	-0.1496	0.400167	-0.00435	0.4	0.0083	0.400333	0.0241
0.4085	0.0492	0.408667	-0.08685	0.408667	-0.15015	0.4085	-0.00465	0.408333	0.00835	0.408667	0.02395
0.416833	0.04845	0.417	-0.08755	0.417	-0.1506	0.416833	-0.004	0.416667	0.0063	0.417	0.02495
0.425167	0.04775	0.425333	-0.08675	0.425333	-0.14965	0.425167	-0.0033	0.425	0.00735	0.425333	0.02455
0.4335	0.04905	0.433667	-0.0872	0.433667	-0.1485	0.4335	-0.00385	0.433333	0.0086	0.433667	0.02555
0.441833	0.0498	0.442	-0.0882	0.442	-0.14955	0.441833	-0.00275	0.441667	0.0085	0.442	0.0255
0.450167	0.0493	0.450333	-0.0872	0.450333	-0.14735	0.450167	-0.00455	0.45	0.00865	0.450333	0.02595
0.4585	0.05	0.458667	-0.08735	0.458667	-0.1484	0.4585	-0.0037	0.458333	0.0076	0.458667	0.0265
0.466833	0.04805	0.467	-0.08665	0.467	-0.14875	0.466833	-0.00315	0.466667	0.0085	0.467	0.02545
0.475167	0.04955	0.475333	-0.08665	0.475333	-0.14775	0.475167	-0.00325	0.475	0.00895	0.475333	0.0259
0.4835	0.0491	0.483667	-0.08695	0.483667	-0.1478	0.4835	-0.00365	0.483333	0.0105	0.483667	0.02615
0.491833	0.04695	0.492	-0.0859	0.492	-0.1489	0.491833	-0.0045	0.491667	0.0084	0.492	0.0257
0.500167	0.04875	0.500333	-0.0879	0.500333	-0.1492	0.500167	-0.00265	0.5	0.0075	0.500333	0.02525
0.5085	0.04725	0.508667	-0.08895	0.508667	-0.15005	0.5085	-0.0033	0.508333	0.00705	0.508667	0.0234
0.516833	0.045	0.517	-0.09055	0.517	-0.151	0.516833	-0.00075	0.516667	0.00725	0.517	0.0232
0.525167	0.0488	0.525333	-0.08655	0.525333	-0.1473	0.525167	-0.004	0.525	0.0088	0.525333	0.0236
0.5335	0.05115	0.533667	-0.08475	0.533667	-0.14555	0.5335	-0.0029	0.533333	0.00995	0.533667	0.0262
0.541833	0.0488	0.542	-0.08655	0.542	-0.14605	0.541833	-0.0043	0.541667	0.00795	0.542	0.02295
0.550167	0.04755	0.550333	-0.08785	0.550333	-0.1468	0.550167	-0.00555	0.55	0.00705	0.550333	0.0242
0.5585	0.0482	0.558667	-0.08835	0.558667	-0.1458	0.5585	-0.0084	0.558333	0.0071	0.558667	0.0237
0.566833	0.04985	0.567	-0.08845	0.567	-0.1492	0.566833	-0.00565	0.566667	0.00675	0.567	0.02475
0.575167	0.04905	0.575333	-0.0883	0.575333	-0.1503	0.575167	-0.00505	0.575	0.0056	0.575333	0.0233
0.5835	0.04795	0.583667	-0.08835	0.583667	-0.1504	0.5835	-0.00655	0.583333	0.0057	0.583667	0.0258
0.591833	0.04755	0.592	-0.08875	0.592	-0.1497	0.591833	-0.00505	0.591667	0.00575	0.592	0.02575
0.600167	0.04875	0.600333	-0.0899	0.600333	-0.14945	0.600167	-0.00365	0.6	0.0061	0.600333	0.02565
0.6085	0.0499	0.608667	-0.0871	0.608667	-0.1472	0.6085	-0.00335	0.608333	0.00775	0.608667	0.0285
0.616833	0.04985	0.617	-0.0887	0.617	-0.1473	0.616833	-0.00355	0.616667	0.00655	0.617	0.0273
0.625167	0.0508	0.625333	-0.08755	0.625333	-0.1468	0.625167	-0.00345	0.625	0.00855	0.625333	0.02805
0.6335	0.0508	0.633667	-0.08775	0.633667	-0.14765	0.6335	-0.00395	0.633333	0.0081	0.633667	0.0263
0.641833	0.05095	0.642	-0.0863	0.642	-0.1449	0.641833	-0.00545	0.641667	0.00895	0.642	0.02725
0.650167	0.05035	0.650333	-0.08855	0.650333	-0.1462	0.650167	-0.0039	0.65	0.00965	0.650333	0.02705
0.6585	0.049	0.658667	-0.08925	0.658667	-0.1467	0.6585	-0.00565	0.658333	0.00925	0.658667	0.0269
0.666833	0.05075	0.667	-0.08755	0.667	-0.1462	0.666833	-0.00425	0.666667	0.00925	0.667	0.0284
0.675167	0.04985	0.675333	-0.08805	0.675333	-0.1462	0.675167	-0.0062	0.675	0.0094	0.675333	0.02755
0.6835	0.04925	0.683667	-0.0884	0.683667	-0.14585	0.6835	-0.0057	0.683333	0.00865	0.683667	0.02695
0.691833	0.04855	0.692	-0.0891	0.692	-0.14605	0.691833	-0.0035	0.691667	0.00815	0.692	0.02655
0.700167	0.04885	0.700333	-0.08945	0.700333	-0.1466	0.700167	-0.00425	0.7	0.00855	0.700333	0.0264
0.7085	0.04825	0.708667	-0.0892	0.708667	-0.1455	0.7085	-0.0038	0.708333	0.0091	0.708667	0.02675
0.716833	0.05005	0.717	-0.08655	0.717	-0.1442	0.716833	-0.0044	0.716667	0.0096	0.717	0.02725
0.725167	0.04855	0.725333	-0.08785	0.725333	-0.14385	0.725167	-0.00465	0.725	0.00935	0.725333	0.0266
0.7335	0.0481	0.733667	-0.0896	0.733667	-0.14555	0.7335	-0.00525	0.733333	0.0078	0.733667	0.02505
0.741833	0.04835	0.742	-0.08925	0.742	-0.1411	0.741833	-0.0066	0.741667	0.008	0.742	0.02665
0.750167	0.0498	0.750333	-0.09115	0.750333	-0.14515	0.750167	-0.00685	0.75	0.00705	0.750333	0.02515
0.7585	0.04935	0.758667	-0.0917	0.758667	-0.14885	0.7585	-0.00635	0.758333	0.00655	0.758667	0.02545
0.766833	0.04845	0.767	-0.09265	0.767	-0.1469	0.766833	-0.0069	0.766667	0.0052	0.767	0.0261
0.775167	0.04905	0.775333	-0.0906	0.775333	-0.14525	0.775167	-0.0068	0.775	0.00735	0.775333	0.02855
0.7835	0.05015	0.783667	-0.0907	0.783667	-0.1459	0.7835	-0.00755	0.783333	0.0063	0.783667	0.02795
0.791833	0.04965	0.792	-0.0902	0.792	-0.14445	0.791833	-0.0067	0.791667	0.0067	0.792	0.0293
0.800167	0.05095	0.800333	-0.09055	0.800333	-0.14505	0.800167	-0.006	0.8	0.0068	0.800333	0.0287
0.8085	0.04935	0.808667	-0.0922	0.808667	-0.145	0.8085	-0.00525	0.808333	0.00635	0.808667	0.0287
0.816833	0.05	0.817	-0.09155	0.817	-0.14475	0.816833	-0.00605	0.816667	0.0061	0.817	0.02885
0.825167	0.0485	0.825333	-0.0909	0.825333	-0.145	0.825167	-0.00525	0.825	0.00655	0.825333	0.0278
0.8335	0.04885	0.833667	-0.09	0.833667	-0.1447	0.8335	-0.0026	0.833333	0.0061	0.833667	0.02765
0.841833	0.0495	0.842	-0.0911	0.842	-0.1448	0.841833	-0.00345	0.841667	0.00715	0.842	0.02935
0.850167	0.04885	0.850333	-0.0911	0.850333	-0.1433	0.850167	-0.00405	0.85	0.00745	0.850333	0.0299
0.8585	0.0493	0.858667	-0.09185	0.858667	-0.1444	0.8585	-0.0055	0.858333	0.00845	0.858667	0.0276
0.866833	0.0479	0.867	-0.09085	0.867	-0.1444	0.866833	-0.0049	0.866667	0.0087	0.867	0.0299
0.875167	0.0481	0.875333	-0.0927	0.875333	-0.14415	0.875167	-0.00455	0.875	0.0073	0.875333	0.02955
0.8835	0.04815	0.883667	-0.0928	0.883667	-0.14445	0.8835	-0.00155	0.883333	0.0067	0.883667	0.0296
0.891833	0.04825	0.892	-0.0931	0.892	-0.1453	0.891833	-0.00445	0.891667	0.00545	0.892	0.0277
0.900167	0.04705	0.900333	-0.0919	0.900333	-0.1429	0.900167	-0.00385	0.9	0.00805	0.900333	0.03075
0.9085	0.05055	0.908667	-0.0919	0.908667	-0.14275	0.9085	-0.00295	0.908333	0.008	0.908667	0.03035
0.916833	0.0489	0.917	-0.0917	0.917	-0.1425	0.916833	-0.00435	0.916667	0.0083	0.917	0.02945
0.925167	0.0485	0.925333	-0.09225	0.925333	-0.1418	0.925167	-0.0058	0.925	0.0081	0.925333	0.0283
0.9335	0.05005	0.933667	-0.0938	0.933667	-0.14065	0.9335	-0.006	0.933333	0.0068	0.933667	0.0292
0.941833	0.0491	0.942	-0.0945	0.942	-0.1445	0.941833	-0.0065	0.941667	0.00625	0.942	0.0294
0.950167	0.0486	0.950333	-0.09385	0.950333	-0.14625	0.950167	-0.0041	0.95	0.00605	0.950333	0.0281
0.9585	0.04875	0.958667	-0.09545	0.958667	-0.144	0.9585	-0.00785	0.958333	0.0051	0.958667	0.0296
0.966833	0.04955	0.967	-0.09365	0.967	-0.1441	0.966833	-0.0068	0.966667	0.00575	0.967	0.0299
0.975167	0.05115	0.975333	-0.0929	0.975333	-0.14275	0.975167	-0.00535	0.975	0.0058	0.975333	0.0307
0.9835	0.05225	0.983667	-0.09355	0.983667	-0.1419	0.9835	-0.00515	0.983333	0.0074	0.983667	0.0328
0.991833	0.05285	0.992	-0.09175	0.992	-0.14005	0.991833	-0.0062	0.991667	0.00785	0.992	0.03355
1.00017	0.05195	1.00033	-0.09355	1.00033	-0.1417	1.00017	-0.0054	1	0.0074	1.00033	0.03315
1.0085	0.05275	1.00867	-0.09155	1.00867	-0.1396	1.0085	-0.00235	1.00833	0.009	1.00867	0.03345
1.01683	0.05075	1.017	-0.0929	1.017	-0.1395	1.01683	-0.00315	1.01667	0.0084	1.017	0.0321
1.02517	0.0511	1.02533	-0.09195	1.02533	-0.13965	1.02517	-0.00245	1.025	0.008	1.02533	0.0339
1.0335	0.051	1.03367	-0.09185	1.03367	-0.14015	1.0335	-0.0019	1.03333	0.00895	1.03367	0.03315
1.04183	0.05025	1.042	-0.0936	1.042	-0.13995	1.04183	-0.00235	1.04167	0.00895	1.042	0.03225
1.05017	0.0482	1.05033	-0.0942	1.05033	-0.14105	1.05017	-0.00315	1.05	0.0064	1.05033	0.03085
1.0585	0.0497	1.05867	-0.0927	1.05867	-0.1396	1.0585	-0.0018	1.05833	0.00895	1.05867	0.03265
1.06683	0.04915	1.067	-0.09415	1.067	-0.14	1.06683	-0.00315	1.06667	0.00895	1.067	0.03175
1.07517	0.04925	1.07533	-0.09325	1.07533	-0.13985	1.07517	-0.00365	1.075	0.009	1.07533	0.0318
1.0835	0.0496	1.08367	-0.0928	1.08367	-0.13915	1.0835	-0.00305	1.08333	0.00905	1.08367	0.03155
1.09183	0.05045	1.092	-0.09345	1.092	-0.13845	1.09183	-0.0039	1.09167	0.0095	1.092	0.03305
1.10017	0.0502	1.10033	-0.0934	1.10033	-0.13775	1.10017	-0.0047	1.1	0.00885	1.10033	0.03115
1.1085	0.04935	1.10867	-0.09315	1.10867	-0.1384	1.1085	-0.005	1.10833	0.0098	1.10867	0.03145
1.11683	0.04945	1.117	-0.09305	1.117	-0.13675	1.11683	-0.0042	1.11667	0.00915	1.117	0.0318
1.12517	0.04725	1.12533	-0.0954	1.12533	-0.1405	1.12517	-0.0043	1.125	0.0072	1.12533	0.03105
1.1335	0.0483	1.13367	-0.0954	1.13367	-0.142	1.1335	-0.0046	1.13333	0.0074	1.13367	0.0305
1.14183	0.04835	1.142	-0.09455	1.142	-0.14105	1.14183	-0.0053	1.14167	0.0081	1.142	0.0317
1.15017	0.0488	1.15033	-0.0938	1.15033	-0.1404	1.15017	-0.007	1.15	0.0094	1.15033	0.0336
1.1585	0.04875	1.15867	-0.09415	1.15867	-0.14005	1.1585	-0.00715	1.15833	0.00875	1.15867	0.0335
1.16683	0.04875	1.167	-0.09605	1.167	-0.1397	1.16683	-0.00655	1.16667	0.0102	1.167	0.03385
1.17517	0.04965	1.17533	-0.09385	1.17533	-0.13895	1.17517	-0.00715	1.175	0.0103	1.17533	0.0346
1.1835	0.05105	1.18367	-0.09405	1.18367	-0.1379	1.1835	-0.0067	1.18333	0.00995	1.18367	0.0357
1.19183	0.05085	1.192	-0.0935	1.192	-0.1384	1.19183	-0.00585	1.19167	0.0105	1.192	0.03635
1.20017	0.05065	1.20033	-0.09485	1.20033	-0.1366	1.20017	-0.0055	1.2	0.01	1.20033	0.0343
1.2085	0.04915	1.20867	-0.09425	1.20867	-0.13805	1.2085	-0.0049	1.20833	0.0104	1.20867	0.03505
1.21683	0.04795	1.217	-0.09385	1.217	-0.13815	1.21683	-0.0043	1.21667	0.0103	1.217	0.0356
1.22517	0.0467	1.22533	-0.09485	1.22533	-0.1396	1.22517	-0.003	1.225	0.008	1.22533	0.03435
1.2335	0.04865	1.23367	-0.09345	1.23367	-0.13815	1.2335	-0.0035	1.23333	0.0105	1.23367	0.0351
1.24183	0.04755	1.242	-0.09425	1.242	-0.13885	1.24183	-0.0048	1.24167	0.01005	1.242	0.0343
1.25017	0.04805	1.25033	-0.0932	1.25033	-0.1382	1.25017	-0.00355	1.25	0.01085	1.25033	0.03375
1.2585	0.0493	1.25867	-0.09505	1.25867	-0.13775	1.2585	-0.00445	1.25833	0.01065	1.25867	0.03325
1.26683	0.0471	1.267	-0.0945	1.267	-0.1396	1.26683	-0.0031	1.26667	0.0101	1.267	0.0334
1.27517	0.0489	1.27533	-0.09365	1.27533	-0.13905	1.27517	-0.0044	1.275	0.01005	1.27533	0.0343
1.2835	0.0493	1.28367	-0.0933	1.28367	-0.13745	1.2835	-0.0068	1.28333	0.01065	1.28367	0.0342
1.29183	0.04875	1.292	-0.0931	1.292	-0.137	1.29183	-0.0038	1.29167	0.0102	1.292	0.0337
1.30017	0.04775	1.30033	-0.0941	1.30033	-0.1357	1.30017	-0.0069	1.3	0.01035	1.30033	0.03365
1.3085	0.0483	1.30867	-0.0947	1.30867	-0.1363	1.3085	-0.0058	1.30833	0.0096	1.30867	0.0326
1.31683	0.04905	1.317	-0.0952	1.317	-0.1408	1.31683	-0.00555	1.31667	0.00965	1.317	0.0338
1.32517	0.04905	1.32533	-0.09625	1.32533	-0.1405	1.32517	-0.0054	1.325	0.0085	1.32533	0.0322
1.3335	0.048	1.33367	-0.0959	1.33367	-0.1393	1.3335	-0.00665	1.33333	0.009	1.33367	0.03365
1.34183	0.0493	1.342	-0.09505	1.342	-0.14015	1.34183	-0.00535	1.34167	0.0091	1.342	0.03525
1.35017	0.049	1.35033	-0.09585	1.35033	-0.14025	1.35017	-0.0062	1.35	0.0086	1.35033	0.0327
1.3585	0.04875	1.35867	-0.0948	1.35867	-0.1387	1.3585	-0.0039	1.35833	0.0087	1.35867	0.034
1.36683	0.0482	1.367	-0.0964	1.367	-0.13935	1.36683	-0.0055	1.36667	0.0088	1.367	0.03445
1.37517	0.0499	1.37533	-0.09575	1.37533	-0.13685	1.37517	-0.0036	1.375	0.0109	1.37533	0.03775
1.3835	0.049	1.38367	-0.0954	1.38367	-0.13785	1.3835	-0.0046	1.38333	0.01055	1.38367	0.036
1.39183	0.04975	1.392	-0.0944	1.392	-0.13585	1.39183	-0.003	1.39167	0.01135	1.392	0.0375
1.40017	0.04895	1.40033	-0.0963	1.40033	-0.13735	1.40017	-0.00355	1.4	0.0083	1.40033	0.0369
1.4085	0.04915	1.40867	-0.0963	1.40867	-0.1376	1.4085	-0.003	1.40833	0.0087	1.40867	0.03585
1.41683	0.0467	1.417	-0.09615	1.417	-0.1385	1.41683	-0.00315	1.41667	0.00895	1.417	0.0358
1.42517	0.04885	1.42533	-0.0948	1.42533	-0.13825	1.42517	-0.0037	1.425	0.01125	1.42533	0.0378
1.4335	0.0477	1.43367	-0.09465	1.43367	-0.1375	1.4335	-0.0037	1.43333	0.0106	1.43367	0.0376
1.44183	0.04785	1.442	-0.0975	1.442	-0.1375	1.44183	-0.0046	1.44167	0.00885	1.442	0.0344
1.45017	0.04815	1.45033	-0.0964	1.45033	-0.13675	1.45017	-0.00365	1.45	0.01125	1.45033	0.03455
1.4585	0.04645	1.45867	-0.0969	1.45867	-0.1382	1.4585	-0.0045	1.45833	0.0102	1.45867	0.03375
1.46683	0.0474	1.467	-0.097	1.467	-0.137	1.46683	-0.004	1.46667	0.0108	1.467	0.03455
1.47517	0.048	1.47533	-0.09625	1.47533	-0.1366	1.47517	-0.0054	1.475	0.0122	1.47533	0.0366
1.4835	0.0474	1.48367	-0.0963	1.48367	-0.13715	1.4835	-0.00455	1.48333	0.01035	1.48367	0.03575
1.49183	0.04805	1.492	-0.0975	1.492	-0.13485	1.49183	-0.0051	1.49167	0.01025	1.492	0.03555
1.50017	0.0482	1.50033	-0.09765	1.50033	-0.13705	1.50017	-0.0055	1.5	0.0107	1.50033	0.0345
1.5085	0.04695	1.50867	-0.1004	1.50867	-0.14125	1.5085	-0.0065	1.50833	0.00895	1.50867	0.03415
1.51683	0.04795	1.517	-0.0992	1.517	-0.13975	1.51683	-0.0048	1.51667	0.01065	1.517	0.03515
1.52517	0.04815	1.52533	-0.09805	1.52533	-0.13885	1.52517	-0.0074	1.525	0.01115	1.52533	0.03575
1.5335	0.04905	1.53367	-0.0966	1.53367	-0.13915	1.5335	-0.0062	1.53333	0.0115	1.53367	0.03665
1.54183	0.04885	1.542	-0.0968	1.542	-0.13875	1.54183	-0.0067	1.54167	0.0111	1.542	0.03775
1.55017	0.04975	1.55033	-0.09825	1.55033	-0.138	1.55017	-0.0047	1.55	0.0111	1.55033	0.03795
1.5585	0.04915	1.55867	-0.0987	1.55867	-0.13785	1.5585	-0.0063	1.55833	0.01085	1.55867	0.03645
1.56683	0.05015	1.567	-0.0982	1.567	-0.1372	1.56683	-0.0038	1.56667	0.0104	1.567	0.0383
1.57517	0.04985	1.57533	-0.0969	1.57533	-0.1368	1.57517	-0.0052	1.575	0.0114	1.57533	0.0378
1.5835	0.04945	1.58367	-0.0974	1.58367	-0.1374	1.5835	-0.0052	1.58333	0.0125	1.58367	0.04025
1.59183	0.04705	1.592	-0.0979	1.592	-0.1376	1.59183	-0.0049	1.59167	0.01255	1.592	0.03955
1.60017	0.0486	1.60033	-0.09685	1.60033	-0.13675	1.60017	-0.00505	1.6	0.0126	1.60033	0.03975
1.6085	0.04845	1.60867	-0.0964	1.60867	-0.13695	1.6085	-0.00675	1.60833	0.01265	1.60867	0.04005
1.61683	0.0477	1.617	-0.0969	1.617	-0.13865	1.61683	-0.0056	1.61667	0.0124	1.617	0.0395
1.62517	0.045	1.62533	-0.09985	1.62533	-0.13855	1.62517	-0.0059	1.625	0.00995	1.62533	0.03845
1.6335	0.0449	1.63367	-0.10185	1.63367	-0.14215	1.6335	-0.0067	1.63333	0.00825	1.63367	0.0371
1.64183	0.0445	1.642	-0.10265	1.642	-0.1424	1.64183	-0.00605	1.64167	0.0061	1.642	0.03535
1.65017	0.0465	1.65033	-0.10155	1.65033	-0.13975	1.65017	-0.00635	1.65	0.0077	1.65033	0.03795
1.6585	0.04595	1.65867	-0.10055	1.65867	-0.13775	1.6585	-0.00595	1.65833	0.0108	1.65867	0.0368
1.66683	0.0458	1.667	-0.09765	1.667	-0.1375	1.66683	-0.0063	1.66667	0.0129	1.667	0.03675
1.67517	0.0473	1.67533	-0.0956	1.67533	-0.1327	1.67517	-0.00635	1.675	0.01555	1.67533	0.0381
1.6835	0.04625	1.68367	-0.09765	1.68367	-0.1372	1.6835	-0.00675	1.68333	0.01365	1.68367	0.03705
1.69183	0.04685	1.692	-0.09695	1.692	-0.13955	1.69183	-0.00755	1.69167	0.01185	1.692	0.0373
1.70017	0.0449	1.70033	-0.09965	1.70033	-0.14235	1.70017	-0.00585	1.7	0.01	1.70033	0.0351
1.7085	0.04585	1.70867	-0.09965	1.70867	-0.1404	1.7085	-0.00555	1.70833	0.0105	1.70867	0.03595
1.71683	0.0467	1.717	-0.10045	1.717	-0.14135	1.71683	-0.00875	1.71667	0.00905	1.717	0.03825
1.72517	0.04815	1.72533	-0.09975	1.72533	-0.1393	1.72517	-0.00535	1.725	0.0104	1.72533	0.03855
1.7335	0.04805	1.73367	-0.0994	1.73367	-0.13825	1.7335	-0.00495	1.73333	0.01015	1.73367	0.0384
1.74183	0.04755	1.742	-0.09975	1.742	-0.13765	1.74183	-0.00465	1.74167	0.00955	1.742	0.03865
1.75017	0.04855	1.75033	-0.1	1.75033	-0.1386	1.75017	-0.00375	1.75	0.0099	1.75033	0.0392
1.7585	0.04615	1.75867	-0.10055	1.75867	-0.13945	1.7585	-0.00305	1.75833	0.00885	1.75867	0.03785
1.76683	0.04745	1.767	-0.1001	1.767	-0.13815	1.76683	-0.003	1.76667	0.01035	1.767	0.0384
1.77517	0.04585	1.77533	-0.09925	1.77533	-0.1393	1.77517	-0.00255	1.775	0.0101	1.77533	0.03875
1.7835	0.04425	1.78367	-0.1016	1.78367	-0.14145	1.7835	-0.00135	1.78333	0.0084	1.78367	0.03705
1.79183	0.0462	1.792	-0.1011	1.792	-0.1398	1.79183	0.00055	1.79167	0.0093	1.792	0.03875
1.80017	0.0456	1.80033	-0.09965	1.80033	-0.13965	1.80017	-0.003	1.8	0.0099	1.80033	0.03805
1.8085	0.0456	1.80867	-0.0998	1.80867	-0.1393	1.8085	-0.0026	1.80833	0.0091	1.80867	0.03875
1.81683	0.0438	1.817	-0.1021	1.817	-0.1408	1.81683	0.001	1.81667	0.00775	1.817	0.0371
1.82517	0.04335	1.82533	-0.1012	1.82533	-0.14155	1.82517	-0.00365	1.825	0.0088	1.82533	0.03665
1.8335	0.04345	1.83367	-0.1019	1.83367	-0.14145	1.8335	-0.0051	1.83333	0.00935	1.83367	0.0365
1.84183	0.04505	1.842	-0.1	1.842	-0.14005	1.84183	-0.01095	1.84167	0.00995	1.842	0.0381
1.85017	0.04655	1.85033	-0.0988	1.85033	-0.1386	1.85017	-0.0047	1.85	0.01055	1.85033	0.03895
1.8585	0.0455	1.85867	-0.101	1.85867	-0.1395	1.8585	0.00175	1.85833	0.0101	1.85867	0.0369
1.86683	0.0443	1.867	-0.1019	1.867	-0.1387	1.86683	0.00285	1.86667	0.0074	1.867	0.0357
1.87517	0.04525	1.87533	-0.10205	1.87533	-0.1413	1.87517	-0.0029	1.875	0.00725	1.87533	0.03685
1.8835	0.04665	1.88367	-0.1034	1.88367	-0.1422	1.8835	-0.00325	1.88333	0.00795	1.88367	0.0365
1.89183	0.045	1.892	-0.1051	1.892	-0.14175	1.89183	-0.0029	1.89167	0.007	1.892	0.0362
1.90017	0.04455	1.90033	-0.10285	1.90033	-0.14125	1.90017	-0.00415	1.9	0.00755	1.90033	0.0372
1.9085	0.0464	1.90867	-0.1018	1.90867	-0.1408	1.9085	-0.0035	1.90833	0.00825	1.90867	0.0388
1.91683	0.0468	1.917	-0.10205	1.917	-0.1402	1.91683	-0.0024	1.91667	0.0078	1.917	0.03875
1.92517	0.04655	1.92533	-0.10115	1.92533	-0.13805	1.92517	-0.0015	1.925	0.00825	1.92533	0.04
1.9335	0.04705	1.93367	-0.1004	1.93367	-0.13855	1.9335	-0.00205	1.93333	0.0101	1.93367	0.04035
1.94183	0.048	1.942	-0.1002	1.942	-0.13885	1.94183	-0.0017	1.94167	0.009	1.942	0.03965
1.95017	0.0472	1.95033	-0.1007	1.95033	-0.1398	1.95017	-0.00205	1.95	0.0089	1.95033	0.0393
1.9585	0.04465	1.95867	-0.10075	1.95867	-0.1404	1.9585	0.0006	1.95833	0.00995	1.95867	0.0396
1.96683	0.0456	1.967	-0.1	1.967	-0.13925	1.96683	-0.00115	1.96667	0.01045	1.967	0.04125
1.97517	0.0454	1.97533	-0.09975	1.97533	-0.1388	1.97517	0.0001	1.975	0.01195	1.97533	0.0403
1.9835	0.045	1.98367	-0.1015	1.98367	-0.14255	1.9835	-0.00255	1.98333	0.01005	1.98367	0.03795
1.99183	0.0447	1.992	-0.1009	1.992	-0.14075	1.99183	-0.00255	1.99167	0.0105	1.992	0.03925
2.00017	0.0437	2.00033	-0.10235	2.00033	-0.1412	2.00017	-0.00245	2	0.0098	2.00033	0.03815
2.0085	0.04535	2.00867	-0.10185	2.00867	-0.14	2.0085	-0.0015	2.00833	0.0096	2.00867	0.0389
2.01683	0.04465	2.017	-0.10185	2.017	-0.14055	2.01683	-0.00315	2.01667	0.0104	2.017	0.03735
2.02517	0.04565	2.02533	-0.1017	2.02533	-0.14025	2.02517	-0.00215	2.025	0.01155	2.02533	0.0388
2.0335	0.04395	2.03367	-0.1013	2.03367	-0.1406	2.0335	-0.00475	2.03333	0.0098	2.03367	0.03845
2.04183	0.036	2.042	-0.10895	2.042	-0.14835	2.04183	-0.004	2.04167	0.0032	2.042	0.03065
2.05017	0.0122	2.05033	-0.1341	2.05033	-0.17075	2.05017	-0.00395	2.05	-0.02175	2.05033	0.0055
2.0585	-0.0426	2.05867	-0.18725	2.05867	-0.2278	2.0585	-0.00515	2.05833	-0.076	2.05867	-0.04775
2.06683	-0.13705	2.067	-0.2825	2.067	-0.32805	2.06683	-0.01035	2.06667	-0.1745	2.067	-0.1455
2.07517	-0.26955	2.07533	-0.4122	2.07533	-0.4667	2.07517	-0.0278	2.075	-0.32105	2.07533	-0.28205
2.0835	-0.4152	2.08367	-0.5534	2.08367	-0.6095	2.0835	-0.06325	2.08333	-0.50555	2.08367	-0.42385
2.09183	-0.52825	2.092	-0.66785	2.092	-0.7051	2.09183	-0.1131	2.09167	-0.69955	2.092	-0.5219
2.10017	-0.5552	2.10033	-0.70395	2.10033	-0.68605	2.10017	-0.163	2.1	-0.8404	2.10033	-0.50035
2.1085	-0.4558	2.10867	-0.6206	2.10867	-0.5262	2.1085	-0.20005	2.10833	-0.85395	2.10867	-0.3163
2.11683	-0.22765	2.117	-0.4108	2.117	-0.24805	2.11683	-0.21295	2.11667	-0.69295	2.117	0.01345
2.12517	0.07975	2.12533	-0.11735	2.12533	0.07545	2.12517	-0.19345	2.125	-0.3659	2.12533	0.4262
2.1335	0.37685	2.13367	0.1638	2.13367	0.3514	2.1335	-0.14475	2.13333	0.03755	2.13367	0.8249
2.14183	0.5751	2.142	0.343	2.142	0.5058	2.14183	-0.06135	2.14167	0.402	2.142	1.13335
2.15017	0.62775	2.15033	0.38645	2.15033	0.5406	2.15017	0.07065	2.15	0.64445	2.15033	1.32085
2.1585	0.5262	2.15867	0.3205	2.15867	0.49825	2.1585	0.2539	2.15833	0.74875	2.15867	1.39785
2.16683	0.3033	2.167	0.18775	2.167	0.42765	2.16683	0.49395	2.16667	0.74875	2.167	1.4228
2.17517	-0.0062	2.17533	0.01385	2.17533	0.4319	2.17517	0.77735	2.175	0.6764	2.17533	1.643
2.1835	-0.3737	2.18367	-0.2033	2.18367	0.8474	2.1835	1.1142	2.18333	0.57285	2.18367	3.0263
2.19183	-0.74135	2.192	-0.43435	2.192	2.47845	2.19183	1.5447	2.19167	0.6036	2.192	8.1536
2.20017	-1.00555	2.20033	-0.57395	2.20033	6.50095	2.20017	2.1597	2.2	1.11035	2.20033	21.1638
2.2085	-1.04375	2.20867	-0.4136	2.20867	13.8799	2.2085	3.04995	2.20833	2.5484	2.20867	45.2022
2.21683	-0.75785	2.217	0.2946	2.217	24.5909	2.21683	4.25295	2.21667	5.22365	2.217	78.6604
2.22517	-0.1368	2.22533	1.6775	2.22533	37.1413	2.22517	5.68345	2.225	8.98535	2.22533	114.877
2.2335	0.7427	2.23367	3.58775	2.23367	48.9301	2.2335	7.15055	2.23333	13.0892	2.23367	145.061
2.24183	1.73135	2.242	5.5665	2.242	57.5684	2.24183	8.42285	2.24167	16.4359	2.242	171.565
2.25017	2.67135	2.25033	7.03695	2.25033	62.0309	2.25017	9.3211	2.25	18.2278	2.25033	187.441
2.2585	3.43915	2.25867	7.6695	2.25867	62.6225	2.2585	9.77035	2.25833	18.4216	2.25867	195.816
2.26683	3.964	2.267	7.54815	2.267	60.3897	2.26683	9.7927	2.26667	17.5357	2.267	198.395
2.27517	4.23575	2.27533	7.0007	2.27533	56.3958	2.27517	9.4704	2.275	16.1588	2.27533	196.506
2.2835	4.2799	2.28367	6.31795	2.28367	51.4378	2.2835	8.9064	2.28333	14.6413	2.28367	191.185
2.29183	4.14485	2.292	5.64115	2.292	46.0778	2.29183	8.1981	2.29167	13.1014	2.292	183.244
2.30017	3.88655	2.30033	4.9929	2.30033	40.6654	2.30017	7.42525	2.3	11.5733	2.30033	173.392
2.3085	3.5566	2.30867	4.36825	2.30867	35.4464	2.3085	6.6422	2.30833	10.0898	2.30867	162.172
2.31683	3.19345	2.317	3.7748	2.317	30.5954	2.31683	5.8882	2.31667	8.6999	2.317	150.061
2.32517	2.8268	2.32533	3.22745	2.32533	26.2136	2.32517	5.182	2.325	7.447	2.32533	137.462
2.3335	2.475	2.33367	2.7383	2.33367	22.3392	2.3335	4.53795	2.33333	6.3463	2.33367	124.758
2.34183	2.15185	2.342	2.31515	2.342	18.9831	2.34183	3.949	2.34167	5.40455	2.342	112.283
2.35017	1.866	2.35033	1.96245	2.35033	16.127	2.35017	3.45415	2.35	4.61395	2.35033	100.327
2.3585	1.61935	2.35867	1.6693	2.35867	13.7241	2.3585	3.02715	2.35833	3.95745	2.35867	89.1086
2.36683	1.40575	2.367	1.4255	2.367	11.7225	2.36683	2.65125	2.36667	3.4128	2.367	78.7806
2.37517	1.2282	2.37533	1.2276	2.37533	10.0633	2.37517	2.32265	2.375	2.9651	2.37533	69.4352
2.3835	1.07695	2.38367	1.0631	2.38367	8.6821	2.3835	2.0505	2.38333	2.5943	2.38367	61.0774
2.39183	0.9527	2.392	0.9282	2.392	7.53345	2.39183	1.82435	2.39167	2.28525	2.392	53.677
2.40017	0.85085	2.40033	0.8186	2.40033	6.57045	2.40017	1.63705	2.4	2.0292	2.40033	47.2007
2.4085	0.7644	2.40867	0.72365	2.40867	5.75885	2.4085	1.47705	2.40833	1.8106	2.40867	41.5725
2.41683	0.69	2.417	0.64105	2.417	5.06985	2.41683	1.3451	2.41667	1.62295	2.417	36.6902
2.42517	0.62655	2.42533	0.5733	2.42533	4.48815	2.42517	1.23085	2.425	1.4632	2.42533	32.4568
2.4335	0.5749	2.43367	0.51255	2.43367	3.9902	2.4335	1.1383	2.43333	1.32815	2.43367	28.322
2.44183	0.531	2.442	0.46315	2.442	3.5642	2.44183	1.05505	2.44167	1.211	2.442	24.9633
2.45017	0.4938	2.45033	0.4196	2.45033	3.2056	2.45017	0.98435	2.45	1.1096	2.45033	22.2341
2.4585	0.46115	2.45867	0.38215	2.45867	2.903	2.4585	0.9271	2.45833	1.02635	2.45867	19.9259
2.46683	0.4327	2.467	0.34865	2.467	2.64795	2.46683	0.8713	2.46667	0.9553	2.467	17.9777
2.47517	0.40925	2.47533	0.31955	2.47533	2.43875	2.47517	0.8227	2.475	0.8981	2.47533	16.3396
2.4835	0.3888	2.48367	0.2944	2.48367	2.2634	2.4835	0.78155	2.48333	0.85065	2.48367	14.9731
2.49183	0.3724	2.492	0.2715	2.492	2.1143	2.49183	0.7425	2.49167	0.8121	2.492	13.8268
2.50017	0.35805	2.50033	0.25215	2.50033	1.98545	2.50017	0.70875	2.5	0.77945	2.50033	12.8759
2.5085	0.3444	2.50867	0.2348	2.50867	1.87175	2.5085	0.6759	2.50833	0.75165	2.50867	12.0763
2.51683	0.3317	2.517	0.22	2.517	1.76945	2.51683	0.6484	2.51667	0.725	2.517	11.4022
2.52517	0.32365	2.52533	0.2063	2.52533	1.67885	2.52517	0.625	2.525	0.7016	2.52533	10.8236
2.5335	0.3167	2.53367	0.1948	2.53367	1.59795	2.5335	0.60255	2.53333	0.68005	2.53367	10.3156
2.54183	0.31655	2.542	0.1865	2.542	1.52365	2.54183	0.5858	2.54167	0.6621	2.542	9.86205
2.55017	0.31925	2.55033	0.17965	2.55033	1.45685	2.55017	0.5699	2.55	0.64715	2.55033	9.44585
2.5585	0.32245	2.55867	0.17715	2.55867	1.39375	2.5585	0.5582	2.55833	0.63245	2.55867	9.05615
2.56683	0.33145	2.567	0.17385	2.567	1.3339	2.56683	0.55035	2.56667	0.61925	2.567	8.682
2.57517	0.3363	2.57533	0.17165	2.57533	1.27575	2.57517	0.54125	2.575	0.60475	2.57533	8.3191
2.5835	0.34015	2.58367	0.1694	2.58367	1.2209	2.5835	0.53025	2.58333	0.58885	2.58367	7.9606
2.59183	0.3421	2.592	0.1628	2.592	1.1691	2.59183	0.5195	2.59167	0.57175	2.592	7.60525
2.60017	0.33665	2.60033	0.15255	2.60033	1.1143	2.60017	0.5071	2.6	0.55485	2.60033	7.24785
2.6085	0.3277	2.60867	0.1408	2.60867	1.06175	2.6085	0.49635	2.60833	0.5354	2.60867	6.89635
2.61683	0.31685	2.617	0.12865	2.617	1.01085	2.61683	0.48345	2.61667	0.51905	2.617	6.55095
2.62517	0.30655	2.62533	0.12055	2.62533	0.9588	2.62517	0.47325	2.625	0.50275	2.62533	6.2151
2.6335	0.29305	2.63367	0.1131	2.63367	0.9089	2.6335	0.46055	2.63333	0.4887	2.63367	5.88735
2.64183	0.27925	2.642	0.10435	2.642	0.86315	2.64183	0.44575	2.64167	0.47405	2.642	5.57305
2.65017	0.26685	2.65033	0.1013	2.65033	0.81815	2.65017	0.43165	2.65	0.46785	2.65033	5.2805
2.6585	0.25475	2.65867	0.09395	2.65867	0.77455	2.6585	0.4184	2.65833	0.4679	2.65867	5.021
2.66683	0.24355	2.667	0.08785	2.667	0.73495	2.66683	0.40795	2.66667	0.48705	2.667	4.82915
2.67517	0.2326	2.67533	0.081	2.67533	0.69715	2.67517	0.3966	2.675	0.5269	2.67533	4.74135
2.6835	0.2246	2.68367	0.0804	2.68367	0.66425	2.6835	0.3853	2.68333	0.5984	2.68367	4.79665
2.69183	0.21705	2.692	0.0784	2.692	0.63265	2.69183	0.37785	2.69167	0.6921	2.692	5.0046
2.70017	0.21195	2.70033	0.084	2.70033	0.6052	2.70017	0.3718	2.7	0.8055	2.70033	5.34195
2.7085	0.2082	2.70867	0.09515	2.70867	0.5797	2.7085	0.36505	2.70833	0.92325	2.70867	5.75495
2.71683	0.2055	2.717	0.1087	2.717	0.55435	2.71683	0.3602	2.71667	1.0309	2.717	6.16145
2.72517	0.2054	2.72533	0.1295	2.72533	0.53345	2.72517	0.3563	2.725	1.1223	2.72533	6.49215
2.7335	0.207	2.73367	0.15045	2.73367	0.51455	2.7335	0.352	2.73333	1.18745	2.73367	6.6979
2.74183	0.2082	2.742	0.172	2.742	0.4998	2.74183	0.34805	2.74167	1.2182	2.742	6.76225
2.75017	0.2076	2.75033	0.18125	2.75033	0.4854	2.75017	0.3472	2.75	1.2123	2.75033	6.6861
2.7585	0.2077	2.75867	0.1833	2.75867	0.4741	2.7585	0.3499	2.75833	1.1817	2.75867	6.49765
2.76683	0.2059	2.767	0.1803	2.767	0.46745	2.76683	0.35415	2.76667	1.13715	2.767	6.228
2.77517	0.20805	2.77533	0.174	2.77533	0.4647	2.77517	0.35995	2.775	1.09155	2.77533	5.91105
2.7835	0.21015	2.78367	0.1698	2.78367	0.46705	2.7835	0.36805	2.78333	1.0511	2.78367	5.57075
2.79183	0.2095	2.792	0.16355	2.792	0.46915	2.79183	0.37895	2.79167	1.0166	2.792	5.22585
2.80017	0.20925	2.80033	0.1622	2.80033	0.47635	2.80017	0.38615	2.8	0.98855	2.80033	4.8936
2.8085	0.21205	2.80867	0.1617	2.80867	0.48215	2.8085	0.3981	2.80833	0.9659	2.80867	4.583
2.81683	0.21135	2.817	0.1618	2.817	0.48655	2.81683	0.40645	2.81667	0.94285	2.817	4.2928
2.82517	0.21465	2.82533	0.1628	2.82533	0.4938	2.82517	0.4147	2.825	0.92495	2.82533	4.0294
2.8335	0.21565	2.83367	0.1631	2.83367	0.4976	2.8335	0.42	2.83333	0.90715	2.83367	3.78995
2.84183	0.21835	2.842	0.16505	2.842	0.5003	2.84183	0.4253	2.84167	0.8927	2.842	3.57275
2.85017	0.2197	2.85033	0.16385	2.85033	0.503	2.85017	0.4288	2.85	0.8779	2.85033	3.3752
2.8585	0.2208	2.85867	0.1643	2.85867	0.5047	2.8585	0.43	2.85833	0.86535	2.85867	3.19845
2.86683	0.2207	2.867	0.164	2.867	0.5037	2.86683	0.42995	2.86667	0.8518	2.867	3.03865
2.87517	0.2205	2.87533	0.16205	2.87533	0.5011	2.87517	0.43055	2.875	0.83895	2.87533	2.8924
2.8835	0.2189	2.88367	0.1608	2.88367	0.498	2.8835	0.4283	2.88333	0.82605	2.88367	2.7599
2.89183	0.2175	2.892	0.161	2.892	0.49515	2.89183	0.42725	2.89167	0.8158	2.892	2.63985
2.90017	0.2188	2.90033	0.15945	2.90033	0.4942	2.90017	0.4289	2.9	0.80495	2.90033	2.53445
2.9085	0.2167	2.90867	0.1605	2.90867	0.49425	2.9085	0.43245	2.90833	0.7941	2.90867	2.4376
2.91683	0.21685	2.917	0.16375	2.917	0.49725	2.91683	0.4383	2.91667	0.7855	2.917	2.35295
2.92517	0.21785	2.92533	0.16555	2.92533	0.5064	2.92517	0.4455	2.925	0.78115	2.92533	2.2772
2.9335	0.22095	2.93367	0.17325	2.93367	0.5269	2.9335	0.45435	2.93333	0.7844	2.93367	2.21195
2.94183	0.22125	2.942	0.1788	2.942	0.5579	2.94183	0.4663	2.94167	0.79405	2.942	2.152
2.95017	0.2249	2.95033	0.18705	2.95033	0.6055	2.95017	0.47505	2.95	0.8159	2.95033	2.10135
2.9585	0.22665	2.95867	0.1939	2.95867	0.66605	2.9585	0.4752	2.95833	0.84435	2.95867	2.0608
2.96683	0.22835	2.967	0.19965	2.967	0.731	2.96683	0.46315	2.96667	0.8769	2.967	2.0255
2.97517	0.22825	2.97533	0.20065	2.97533	0.7905	2.97517	0.4734	2.975	0.90515	2.97533	1.99415
2.9835	0.22435	2.98367	0.2009	2.98367	0.83265	2.9835	0.50485	2.98333	0.9244	2.98367	1.9659
2.99183	0.2223	2.992	0.19935	2.992	0.8561	2.99183	0.4823	2.99167	0.93635	2.992	1.94055
3.00017	0.2184	3.00033	0.19745	3.00033	0.8553	3.00017	0.46345	3	0.9401	3.00033	1.9145
3.0085	0.2158	3.00867	0.19585	3.00867	0.84145	3.0085	0.4575	3.00833	0.9394	3.00867	1.88295
3.01683	0.21065	3.017	0.1936	3.017	0.8135	3.01683	0.451	3.01667	0.93215	3.017	1.8494
3.02517	0.20535	3.02533	0.19175	3.02533	0.78025	3.02517	0.44285	3.025	0.92335	3.02533	1.81465
3.0335	0.20045	3.03367	0.19115	3.03367	0.7443	3.0335	0.43795	3.03333	0.91245	3.03367	1.77575
3.04183	0.19855	3.042	0.1905	3.042	0.70835	3.04183	0.4298	3.04167	0.90055	3.042	1.7367
3.05017	0.19315	3.05033	0.1881	3.05033	0.6718	3.05017	0.4243	3.05	0.8879	3.05033	1.6931
3.0585	0.19095	3.05867	0.18825	3.05867	0.6389	3.0585	0.42095	3.05833	0.87795	3.05867	1.6525
3.06683	0.18765	3.067	0.18765	3.067	0.60905	3.06683	0.41625	3.06667	0.87175	3.067	1.61165
3.07517	0.1827	3.07533	0.18845	3.07533	0.5826	3.07517	0.41425	3.075	0.86865	3.07533	1.5715
3.0835	0.18215	3.08367	0.1889	3.08367	0.5583	3.0835	0.4141	3.08333	0.87255	3.08367	1.53595
3.09183	0.1807	3.092	0.19235	3.092	0.5377	3.09183	0.4133	3.09167	0.88045	3.092	1.50335
3.10017	0.179	3.10033	0.19465	3.10033	0.5196	3.10017	0.413	3.1	0.89295	3.10033	1.47445
3.1085	0.17695	3.10867	0.19955	3.10867	0.505	3.1085	0.40995	3.10833	0.9063	3.10867	1.44845
3.11683	0.17275	3.117	0.206	3.117	0.49045	3.11683	0.40755	3.11667	0.91275	3.117	1.42685
3.12517	0.1712	3.12533	0.21065	3.12533	0.4764	3.12517	0.40485	3.125	0.9139	3.12533	1.40805
3.1335	0.1643	3.13367	0.2108	3.13367	0.46145	3.1335	0.40165	3.13333	0.90345	3.13367	1.38735
3.14183	0.163	3.142	0.21785	3.142	0.4484	3.14183	0.40025	3.14167	0.8902	3.142	1.3686
3.15017	0.16205	3.15033	0.2211	3.15033	0.437	3.15017	0.3996	3.15	0.87395	3.15033	1.3497
3.1585	0.15785	3.15867	0.22025	3.15867	0.42305	3.1585	0.3985	3.15833	0.85205	3.15867	1.32695
3.16683	0.1559	3.167	0.2185	3.167	0.4105	3.16683	0.3968	3.16667	0.83095	3.167	1.3028
3.17517	0.1527	3.17533	0.21325	3.17533	0.3974	3.17517	0.3955	3.175	0.8093	3.17533	1.27735
3.1835	0.14995	3.18367	0.2061	3.18367	0.38485	3.1835	0.3955	3.18333	0.78945	3.18367	1.2519
3.19183	0.1467	3.192	0.1986	3.192	0.375	3.19183	0.395	3.19167	0.77225	3.192	1.22655
3.20017	0.1461	3.20033	0.1894	3.20033	0.36905	3.20017	0.3967	3.2	0.75575	3.20033	1.2018
3.2085	0.1437	3.20867	0.1807	3.20867	0.36405	3.2085	0.39725	3.20833	0.74245	3.20867	1.17865
3.21683	0.1436	3.217	0.17495	3.217	0.3675	3.21683	0.4037	3.21667	0.7329	3.217	1.15685
3.22517	0.14245	3.22533	0.16685	3.22533	0.3847	3.22517	0.4061	3.225	0.72405	3.22533	1.1362
3.2335	0.14155	3.23367	0.1608	3.23367	0.4249	3.2335	0.4092	3.23333	0.71975	3.23367	1.12265
3.24183	0.1408	3.242	0.1553	3.242	0.5012	3.24183	0.41245	3.24167	0.7206	3.242	1.12565
3.25017	0.14165	3.25033	0.15235	3.25033	0.61525	3.25017	0.4161	3.25	0.7265	3.25033	1.1487
3.2585	0.14185	3.25867	0.14905	3.25867	0.76075	3.2585	0.4179	3.25833	0.7375	3.25867	1.2006
3.26683	0.14155	3.267	0.1469	3.267	0.91595	3.26683	0.4201	3.26667	0.75	3.267	1.2894
3.27517	0.14285	3.27533	0.14525	3.27533	1.05505	3.27517	0.4233	3.275	0.7643	3.27533	1.4093
3.2835	0.14165	3.28367	0.14435	3.28367	1.15915	3.2835	0.42175	3.28333	0.7755	3.28367	1.5506
3.29183	0.14335	3.292	0.14305	3.292	1.217	3.29183	0.4204	3.29167	0.7834	3.292	1.6886
3.30017	0.14385	3.30033	0.1409	3.30033	1.2267	3.30017	0.41695	3.3	0.7887	3.30033	1.8071
3.3085	0.1438	3.30867	0.139	3.30867	1.2035	3.3085	0.409	3.30833	0.7892	3.30867	1.89265
3.31683	0.1457	3.317	0.13815	3.317	1.1544	3.31683	0.4092	3.31667	0.78895	3.317	1.93875
3.32517	0.14555	3.32533	0.13635	3.32533	1.09015	3.32517	0.40525	3.325	0.7869	3.32533	1.94485
3.3335	0.1455	3.33367	0.13715	3.33367	1.01895	3.3335	0.4027	3.33333	0.784	3.33367	1.921
3.34183	0.14775	3.342	0.1366	3.342	0.94575	3.34183	0.39975	3.34167	0.7819	3.342	1.87475
3.35017	0.14925	3.35033	0.1388	3.35033	0.87235	3.35017	0.39795	3.35	0.78075	3.35033	1.8121
3.3585	0.1537	3.35867	0.1463	3.35867	0.80855	3.3585	0.39665	3.35833	0.78315	3.35867	1.7454
3.36683	0.1562	3.367	0.14985	3.367	0.74505	3.36683	0.3934	3.36667	0.785	3.367	1.6738
3.37517	0.16	3.37533	0.1596	3.37533	0.6883	3.37517	0.3895	3.375	0.7878	3.37533	1.60555
3.3835	0.1659	3.38367	0.1676	3.38367	0.63735	3.3835	0.3866	3.38333	0.7898	3.38367	1.5384
3.39183	0.16965	3.392	0.17655	3.392	0.59105	3.39183	0.38385	3.39167	0.7918	3.392	1.4781
3.40017	0.1732	3.40033	0.18255	3.40033	0.5497	3.40017	0.37815	3.4	0.7908	3.40033	1.4178
3.4085	0.17895	3.40867	0.19135	3.40867	0.5149	3.4085	0.37365	3.40833	0.791	3.40867	1.3667
3.41683	0.18465	3.417	0.19605	3.417	0.4851	3.41683	0.37175	3.41667	0.78745	3.417	1.31875
3.42517	0.18725	3.42533	0.20095	3.42533	0.46115	3.42517	0.36915	3.425	0.7844	3.42533	1.27535
3.4335	0.18855	3.43367	0.20255	3.43367	0.43815	3.4335	0.35605	3.43333	0.77815	3.43367	1.2334
3.44183	0.19125	3.442	0.2041	3.442	0.4198	3.44183	0.3413	3.44167	0.77285	3.442	1.1979
3.45017	0.1915	3.45033	0.20525	3.45033	0.40325	3.45017	0.38105	3.45	0.76795	3.45033	1.16355
3.4585	0.1938	3.45867	0.20735	3.45867	0.39355	3.4585	0.38165	3.45833	0.7629	3.45867	1.1368
3.46683	0.1917	3.467	0.2064	3.467	0.3809	3.46683	0.34385	3.46667	0.76	3.467	1.1104
3.47517	0.19165	3.47533	0.2058	3.47533	0.36765	3.47517	0.33315	3.475	0.75395	3.47533	1.08585
3.4835	0.1912	3.48367	0.20435	3.48367	0.35695	3.4835	0.33015	3.48333	0.7501	3.48367	1.0647
3.49183	0.1905	3.492	0.2067	3.492	0.34665	3.49183	0.32635	3.49167	0.7477	3.492	1.04635
3.50017	0.1923	3.50033	0.20575	3.50033	0.33505	3.50017	0.32255	3.5	0.74195	3.50033	1.0285
3.5085	0.1907	3.50867	0.2054	3.50867	0.32495	3.5085	0.32095	3.50833	0.7377	3.50867	1.0105
3.51683	0.19245	3.517	0.2063	3.517	0.3171	3.51683	0.31635	3.51667	0.7363	3.517	0.9975
3.52517	0.19315	3.52533	0.2072	3.52533	0.309	3.52517	0.3148	3.525	0.73265	3.52533	0.98355
3.5335	0.1961	3.53367	0.2075	3.53367	0.30445	3.5335	0.3087	3.53333	0.7324	3.53367	0.97295
3.54183	0.19425	3.542	0.20585	3.542	0.29615	3.54183	0.3049	3.54167	0.7276	3.542	0.9615
3.55017	0.1963	3.55033	0.20505	3.55033	0.28925	3.55017	0.3026	3.55	0.72385	3.55033	0.94915
3.5585	0.19595	3.55867	0.2031	3.55867	0.2815	3.5585	0.30115	3.55833	0.721	3.55867	0.9384
3.56683	0.1965	3.567	0.20425	3.567	0.2765	3.56683	0.2962	3.56667	0.7187	3.567	0.92895
3.57517	0.19605	3.57533	0.2023	3.57533	0.2729	3.57517	0.29485	3.575	0.71535	3.57533	0.9199
3.5835	0.1932	3.58367	0.2008	3.58367	0.26655	3.5835	0.2918	3.58333	0.7122	3.58367	0.91165
3.59183	0.1913	3.592	0.1996	3.592	0.2615	3.59183	0.2907	3.59167	0.71015	3.592	0.90425
3.60017	0.1939	3.60033	0.20085	3.60033	0.2564	3.60017	0.2894	3.6	0.7085	3.60033	0.89745
3.6085	0.1935	3.60867	0.19825	3.60867	0.2516	3.6085	0.28935	3.60833	0.7043	3.60867	0.88945
3.61683	0.19395	3.617	0.1992	3.617	0.25095	3.61683	0.2887	3.61667	0.7035	3.617	0.8851
3.62517	0.19515	3.62533	0.19905	3.62533	0.25065	3.62517	0.2902	3.625	0.7025	3.62533	0.87955
3.6335	0.19375	3.63367	0.1987	3.63367	0.2507	3.6335	0.29135	3.63333	0.70055	3.63367	0.87355
3.64183	0.191	3.642	0.19695	3.642	0.25035	3.64183	0.29305	3.64167	0.69885	3.642	0.8682
3.65017	0.1893	3.65033	0.1968	3.65033	0.2526	3.65017	0.2979	3.65	0.69675	3.65033	0.8668
3.6585	0.18835	3.65867	0.19595	3.65867	0.25655	3.6585	0.3022	3.65833	0.69445	3.65867	0.8672
3.66683	0.19025	3.667	0.19835	3.667	0.26445	3.66683	0.3082	3.66667	0.69425	3.667	0.8734
3.67517	0.18865	3.67533	0.19705	3.67533	0.271	3.67517	0.30785	3.675	0.6925	3.67533	0.87805
3.6835	0.18815	3.68367	0.19595	3.68367	0.27655	3.6835	0.3127	3.68333	0.6892	3.68367	0.88465
3.69183	0.1912	3.692	0.19735	3.692	0.2856	3.69183	0.31615	3.69167	0.6882	3.692	0.8955
3.70017	0.19055	3.70033	0.19565	3.70033	0.28865	3.70017	0.31735	3.7	0.6877	3.70033	0.9036
3.7085	0.1891	3.70867	0.19405	3.70867	0.29105	3.7085	0.31575	3.70833	0.6845	3.70867	0.90855
3.71683	0.1902	3.717	0.194	3.717	0.2927	3.71683	0.31515	3.71667	0.68495	3.717	0.9144
3.72517	0.19015	3.72533	0.19145	3.72533	0.29065	3.72517	0.312	3.725	0.68355	3.72533	0.9178
3.7335	0.1892	3.73367	0.1905	3.73367	0.28665	3.7335	0.31065	3.73333	0.68485	3.73367	0.9154
3.74183	0.1892	3.742	0.1909	3.742	0.2797	3.74183	0.30525	3.74167	0.6836	3.742	0.9118
3.75017	0.18815	3.75033	0.18895	3.75033	0.2729	3.75017	0.30005	3.75	0.68255	3.75033	0.90525
3.7585	0.18925	3.75867	0.18925	3.75867	0.2662	3.7585	0.29915	3.75833	0.68405	3.75867	0.8992
3.76683	0.18995	3.767	0.1885	3.767	0.2589	3.76683	0.29305	3.76667	0.68515	3.767	0.8911
3.77517	0.1896	3.77533	0.1894	3.77533	0.2515	3.77517	0.2903	3.775	0.68705	3.77533	0.88295
3.7835	0.1882	3.78367	0.1891	3.78367	0.24605	3.7835	0.28515	3.78333	0.68975	3.78367	0.87375
3.79183	0.1906	3.792	0.1894	3.792	0.2392	3.79183	0.2835	3.79167	0.6913	3.792	0.8627
3.80017	0.18825	3.80033	0.1891	3.80033	0.23435	3.80017	0.2783	3.8	0.693	3.80033	0.8545
3.8085	0.18835	3.80867	0.18875	3.80867	0.2271	3.8085	0.2746	3.80833	0.69385	3.80867	0.84305
3.81683	0.18965	3.817	0.1885	3.817	0.2233	3.81683	0.2717	3.81667	0.69545	3.817	0.8361
3.82517	0.18865	3.82533	0.18765	3.82533	0.2193	3.82517	0.2681	3.825	0.69665	3.82533	0.8248
3.8335	0.18745	3.83367	0.1876	3.83367	0.2138	3.8335	0.26705	3.83333	0.6952	3.83367	0.8152
3.84183	0.1899	3.842	0.18825	3.842	0.21185	3.84183	0.26385	3.84167	0.69725	3.842	0.8103
3.85017	0.18845	3.85033	0.18815	3.85033	0.2082	3.85017	0.2609	3.85	0.69535	3.85033	0.8024
3.8585	0.1881	3.85867	0.18585	3.85867	0.2043	3.8585	0.25785	3.85833	0.6953	3.85867	0.79575
3.86683	0.18715	3.867	0.18805	3.867	0.20225	3.86683	0.2538	3.86667	0.6946	3.867	0.78955
3.87517	0.1873	3.87533	0.1857	3.87533	0.1985	3.87517	0.25365	3.875	0.6917	3.87533	0.78395
3.8835	0.1868	3.88367	0.18555	3.88367	0.1959	3.8835	0.24865	3.88333	0.68855	3.88367	0.7774
3.89183	0.1855	3.892	0.18445	3.892	0.193	3.89183	0.2463	3.89167	0.68555	3.892	0.7727
3.90017	0.1846	3.90033	0.18405	3.90033	0.18945	3.90017	0.2451	3.9	0.6822	3.90033	0.76805
3.9085	0.18665	3.90867	0.18555	3.90867	0.188	3.9085	0.242	3.90833	0.6813	3.90867	0.76575
3.91683	0.1854	3.917	0.1837	3.917	0.18605	3.91683	0.2405	3.91667	0.6772	3.917	0.75875
3.92517	0.18475	3.92533	0.18465	3.92533	0.18355	3.92517	0.2393	3.925	0.67495	3.92533	0.7545
3.9335	0.18345	3.93367	0.18325	3.93367	0.1809	3.9335	0.2354	3.93333	0.6699	3.93367	0.75125
3.94183	0.18545	3.942	0.18365	3.942	0.18035	3.94183	0.23585	3.94167	0.6689	3.942	0.7469
3.95017	0.18505	3.95033	0.18195	3.95033	0.17805	3.95017	0.2342	3.95	0.6649	3.95033	0.74245
3.9585	0.18285	3.95867	0.18095	3.95867	0.17485	3.9585	0.23215	3.95833	0.66265	3.95867	0.73855
3.96683	0.18375	3.967	0.18185	3.967	0.1753	3.96683	0.2291	3.96667	0.6604	3.967	0.73605
3.97517	0.18445	3.97533	0.1822	3.97533	0.17555	3.97517	0.22855	3.975	0.6601	3.97533	0.7366
3.9835	0.18395	3.98367	0.18145	3.98367	0.175	3.9835	0.2272	3.98333	0.65615	3.98367	0.7356
3.99183	0.1848	3.992	0.18265	3.992	0.1747	3.99183	0.22705	3.99167	0.65565	3.992	0.7383
4.00017	0.18535	4.00033	0.18145	4.00033	0.17355	4.00017	0.2258	4	0.65465	4.00033	0.7409
4.0085	0.1825	4.00867	0.1806	4.00867	0.17185	4.0085	0.2251	4.00833	0.65175	4.00867	0.74305
4.01683	0.183	4.017	0.18055	4.017	0.17175	4.01683	0.22395	4.01667	0.65	4.017	0.7486
4.02517	0.18105	4.02533	0.17945	4.02533	0.1697	4.02517	0.2225	4.025	0.64995	4.02533	0.75635
4.0335	0.1796	4.03367	0.17795	4.03367	0.1668	4.0335	0.22385	4.03333	0.648	4.03367	0.76095
4.04183	0.17975	4.042	0.17765	4.042	0.1677	4.04183	0.22285	4.04167	0.6475	4.042	0.76585
4.05017	0.1798	4.05033	0.17935	4.05033	0.1667	4.05017	0.2196	4.05	0.64885	4.05033	0.773
4.0585	0.17855	4.05867	0.1781	4.05867	0.1645	4.0585	0.21855	4.05833	0.64695	4.05867	0.7756
4.06683	0.17775	4.067	0.17425	4.067	0.16455	4.06683	0.2192	4.06667	0.64705	4.067	0.77935
4.07517	0.1791	4.07533	0.1779	4.07533	0.16535	4.07517	0.21795	4.075	0.64985	4.07533	0.78435
4.0835	0.1761	4.08367	0.17435	4.08367	0.1607	4.0835	0.21655	4.08333	0.6484	4.08367	0.783
4.09183	0.1777	4.092	0.17465	4.092	0.16235	4.09183	0.21615	4.09167	0.649	4.092	0.78455
4.10017	0.17825	4.10033	0.1744	4.10033	0.1619	4.10017	0.2126	4.1	0.65	4.10033	0.78545
4.1085	0.17715	4.10867	0.1744	4.10867	0.16115	4.1085	0.21325	4.10833	0.65015	4.10867	0.7832
4.11683	0.17575	4.117	0.17365	4.117	0.15745	4.11683	0.2117	4.11667	0.64915	4.117	0.78155
4.12517	0.17525	4.12533	0.17215	4.12533	0.15645	4.12517	0.20945	4.125	0.6485	4.12533	0.7778
4.1335	0.17605	4.13367	0.17025	4.13367	0.15475	4.1335	0.2131	4.13333	0.6482	4.13367	0.77435
4.14183	0.17405	4.142	0.1706	4.142	0.1528	4.14183	0.2136	4.14167	0.6451	4.142	0.7697
4.15017	0.1748	4.15033	0.1706	4.15033	0.15155	4.15017	0.21575	4.15	0.64655	4.15033	0.7642
4.1585	0.1744	4.15867	0.1701	4.15867	0.1508	4.1585	0.21835	4.15833	0.64605	4.15867	0.75965
4.16683	0.1751	4.167	0.17075	4.167	0.1492	4.16683	0.22265	4.16667	0.645	4.167	0.7546
4.17517	0.17635	4.17533	0.17165	4.17533	0.1496	4.17517	0.22545	4.175	0.6465	4.17533	0.7501
4.1835	0.17675	4.18367	0.17185	4.18367	0.14955	4.1835	0.22695	4.18333	0.64745	4.18367	0.74565
4.19183	0.17545	4.192	0.17085	4.192	0.1481	4.19183	0.22855	4.19167	0.64555	4.192	0.7383
4.20017	0.176	4.20033	0.16905	4.20033	0.14935	4.20017	0.2292	4.2	0.6474	4.20033	0.7326
4.2085	0.17425	4.20867	0.17145	4.20867	0.1493	4.2085	0.23085	4.20833	0.64805	4.20867	0.7256
4.21683	0.17435	4.217	0.1729	4.217	0.1497	4.21683	0.2315	4.21667	0.64895	4.217	0.7215
4.22517	0.17445	4.22533	0.1731	4.22533	0.1511	4.22517	0.231	4.225	0.6494	4.22533	0.7164
4.2335	0.1751	4.23367	0.1745	4.23367	0.15225	4.2335	0.23135	4.23333	0.6517	4.23367	0.7106
4.24183	0.17615	4.242	0.17705	4.242	0.1539	4.24183	0.22725	4.24167	0.65435	4.242	0.70865
4.25017	0.1803	4.25033	0.18085	4.25033	0.15835	4.25017	0.22725	4.25	0.65795	4.25033	0.70745
4.2585	0.1817	4.25867	0.184	4.25867	0.1597	4.2585	0.2281	4.25833	0.66185	4.25867	0.7069
4.26683	0.18555	4.267	0.1871	4.267	0.16125	4.26683	0.22675	4.26667	0.6663	4.267	0.7075
4.27517	0.19	4.27533	0.1886	4.27533	0.1638	4.27517	0.22645	4.275	0.6725	4.27533	0.70905
4.2835	0.1968	4.28367	0.19395	4.28367	0.16655	4.2835	0.22855	4.28333	0.6806	4.28367	0.713
4.29183	0.2015	4.292	0.1957	4.292	0.1678	4.29183	0.22645	4.29167	0.68975	4.292	0.7153
4.30017	0.20485	4.30033	0.19515	4.30033	0.1649	4.30017	0.2262	4.3	0.69875	4.30033	0.7153
4.3085	0.21205	4.30867	0.1957	4.30867	0.1662	4.3085	0.226	4.30833	0.7097	4.30867	0.7187
4.31683	0.21345	4.317	0.1955	4.317	0.16295	4.31683	0.2247	4.31667	0.7172	4.317	0.7193
4.32517	0.2154	4.32533	0.19315	4.32533	0.1613	4.32517	0.2249	4.325	0.72695	4.32533	0.71805
4.3335	0.2173	4.33367	0.1934	4.33367	0.15985	4.3335	0.22515	4.33333	0.73385	4.33367	0.71805
4.34183	0.21745	4.342	0.1918	4.342	0.15655	4.34183	0.2242	4.34167	0.7395	4.342	0.7163
4.35017	0.21975	4.35033	0.19295	4.35033	0.15665	4.35017	0.22645	4.35	0.7439	4.35033	0.71435
4.3585	0.2204	4.35867	0.19165	4.35867	0.15555	4.3585	0.2258	4.35833	0.7456	4.35867	0.7147
4.36683	0.21675	4.367	0.1895	4.367	0.1518	4.36683	0.2264	4.36667	0.7444	4.367	0.7121
4.37517	0.2153	4.37533	0.1873	4.37533	0.1473	4.37517	0.22455	4.375	0.7416	4.37533	0.7103
4.3835	0.2145	4.38367	0.18565	4.38367	0.1463	4.3835	0.22445	4.38333	0.7394	4.38367	0.70685
4.39183	0.211	4.392	0.1833	4.392	0.14235	4.39183	0.2243	4.39167	0.7366	4.392	0.7022
4.40017	0.2068	4.40033	0.18055	4.40033	0.13765	4.40017	0.22135	4.4	0.7301	4.40033	0.69755
4.4085	0.20465	4.40867	0.17945	4.40867	0.1325	4.4085	0.2188	4.40833	0.7248	4.40867	0.6933
4.41683	0.20055	4.417	0.17755	4.417	0.12765	4.41683	0.21755	4.41667	0.71955	4.417	0.6888
4.42517	0.19865	4.42533	0.17785	4.42533	0.12245	4.42517	0.21685	4.425	0.7155	4.42533	0.68365
4.4335	0.195	4.43367	0.1758	4.43367	0.1184	4.4335	0.21625	4.43333	0.70905	4.43367	0.67795
4.44183	0.1925	4.442	0.17595	4.442	0.1154	4.44183	0.21525	4.44167	0.70285	4.442	0.6733
4.45017	0.1907	4.45033	0.1756	4.45033	0.11715	4.45017	0.21635	4.45	0.6996	4.45033	0.6678
4.4585	0.18665	4.45867	0.1764	4.45867	0.11955	4.4585	0.21405	4.45833	0.69235	4.45867	0.6606
4.46683	0.18625	4.467	0.17765	4.467	0.1263	4.46683	0.2095	4.46667	0.688	4.467	0.6563
4.47517	0.18625	4.47533	0.1802	4.47533	0.13505	4.47517	0.2092	4.475	0.68585	4.47533	0.6542
4.4835	0.1849	4.48367	0.17945	4.48367	0.14125	4.4835	0.20665	4.48333	0.6822	4.48367	0.64885
4.49183	0.1821	4.492	0.17925	4.492	0.14905	4.49183	0.2042	4.49167	0.67945	4.492	0.64445
4.50017	0.1821	4.50033	0.17915	4.50033	0.1549	4.50017	0.20305	4.5	0.67715	4.50033	0.6413
4.5085	0.18055	4.50867	0.17805	4.50867	0.15855	4.5085	0.20075	4.50833	0.6719	4.50867	0.63775
4.51683	0.18115	4.517	0.17895	4.517	0.16125	4.51683	0.1994	4.51667	0.67005	4.517	0.63285
4.52517	0.1762	4.52533	0.1782	4.52533	0.16175	4.52517	0.1986	4.525	0.66775	4.52533	0.63055
4.5335	0.1774	4.53367	0.1773	4.53367	0.1638	4.5335	0.19665	4.53333	0.6666	4.53367	0.62815
4.54183	0.1776	4.542	0.17655	4.542	0.16385	4.54183	0.1958	4.54167	0.66635	4.542	0.62545
4.55017	0.1778	4.55033	0.17645	4.55033	0.1631	4.55017	0.19585	4.55	0.6644	4.55033	0.6234
4.5585	0.17665	4.55867	0.1764	4.55867	0.16325	4.5585	0.1938	4.55833	0.66495	4.55867	0.6204
4.56683	0.1757	4.567	0.17525	4.567	0.1604	4.56683	0.1937	4.56667	0.6647	4.567	0.6185
4.57517	0.17385	4.57533	0.174	4.57533	0.1567	4.57517	0.1945	4.575	0.664	4.57533	0.61485
4.5835	0.1729	4.58367	0.1733	4.58367	0.15285	4.5835	0.1931	4.58333	0.6647	4.58367	0.6118
4.59183	0.17295	4.592	0.1734	4.592	0.15145	4.59183	0.1928	4.59167	0.66545	4.592	0.6116
4.60017	0.17215	4.60033	0.17205	4.60033	0.1487	4.60017	0.19185	4.6	0.66545	4.60033	0.6082
4.6085	0.17215	4.60867	0.172	4.60867	0.1455	4.6085	0.19065	4.60833	0.6637	4.60867	0.60585
4.61683	0.17125	4.617	0.1722	4.617	0.14345	4.61683	0.1923	4.61667	0.66625	4.617	0.604
4.62517	0.1703	4.62533	0.17095	4.62533	0.1411	4.62517	0.191	4.625	0.6651	4.62533	0.60095
4.6335	0.1709	4.63367	0.16955	4.63367	0.13785	4.6335	0.1901	4.63333	0.66485	4.63367	0.5997
4.64183	0.1696	4.642	0.1687	4.642	0.13515	4.64183	0.18975	4.64167	0.66265	4.642	0.59605
4.65017	0.168	4.65033	0.16655	4.65033	0.13215	4.65017	0.1919	4.65	0.661	4.65033	0.59385
4.6585	0.1682	4.65867	0.16695	4.65867	0.13115	4.6585	0.1923	4.65833	0.66085	4.65867	0.5928
4.66683	0.1671	4.667	0.16625	4.667	0.12855	4.66683	0.19025	4.66667	0.65915	4.667	0.5908
4.67517	0.1683	4.67533	0.16515	4.67533	0.12895	4.67517	0.19025	4.675	0.6593	4.67533	0.588
4.6835	0.1687	4.68367	0.1642	4.68367	0.1269	4.6835	0.19115	4.68333	0.6567	4.68367	0.58565
4.69183	0.16665	4.692	0.1617	4.692	0.12415	4.69183	0.19065	4.69167	0.6555	4.692	0.5834
4.70017	0.1675	4.70033	0.162	4.70033	0.1247	4.70017	0.193	4.7	0.6543	4.70033	0.5826
4.7085	0.16575	4.70867	0.16185	4.70867	0.12305	4.7085	0.19195	4.70833	0.65345	4.70867	0.58035
4.71683	0.1655	4.717	0.16035	4.717	0.12035	4.71683	0.19175	4.71667	0.65285	4.717	0.5794
4.72517	0.1643	4.72533	0.1591	4.72533	0.1198	4.72517	0.1942	4.725	0.65175	4.72533	0.5777
4.7335	0.1634	4.73367	0.16	4.73367	0.11935	4.7335	0.19605	4.73333	0.65255	4.73367	0.57705
4.74183	0.16345	4.742	0.15905	4.742	0.11785	4.74183	0.19635	4.74167	0.6523	4.742	0.5758
4.75017	0.16115	4.75033	0.15775	4.75033	0.1162	4.75017	0.1977	4.75	0.65065	4.75033	0.57435
4.7585	0.16135	4.75867	0.15955	4.75867	0.11565	4.7585	0.1973	4.75833	0.6511	4.75867	0.572
4.76683	0.1602	4.767	0.15815	4.767	0.11375	4.76683	0.19665	4.76667	0.65175	4.767	0.56985
4.77517	0.15865	4.77533	0.15705	4.77533	0.11225	4.77517	0.1961	4.775	0.64875	4.77533	0.5685
4.7835	0.15785	4.78367	0.1569	4.78367	0.1117	4.7835	0.1951	4.78333	0.6505	4.78367	0.56725
4.79183	0.1562	4.792	0.1542	4.792	0.11005	4.79183	0.1957	4.79167	0.65015	4.792	0.5653
4.80017	0.1574	4.80033	0.15615	4.80033	0.11	4.80017	0.19395	4.8	0.6503	4.80033	0.5633
4.8085	0.1568	4.80867	0.1557	4.80867	0.1094	4.8085	0.1937	4.80833	0.6506	4.80867	0.56195
4.81683	0.1563	4.817	0.1548	4.817	0.1089	4.81683	0.19165	4.81667	0.6509	4.817	0.5591
4.82517	0.15725	4.82533	0.15545	4.82533	0.1101	4.82517	0.19275	4.825	0.6553	4.82533	0.55875
4.8335	0.15385	4.83367	0.15465	4.83367	0.10795	4.8335	0.19255	4.83333	0.6566	4.83367	0.5548
4.84183	0.15635	4.842	0.157	4.842	0.1094	4.84183	0.1928	4.84167	0.66245	4.842	0.55395
4.85017	0.1534	4.85033	0.155	4.85033	0.10745	4.85017	0.1927	4.85	0.667	4.85033	0.5519
4.8585	0.1535	4.85867	0.1562	4.85867	0.1096	4.8585	0.1928	4.85833	0.6754	4.85867	0.5503
4.86683	0.1536	4.867	0.15505	4.867	0.1097	4.86683	0.19335	4.86667	0.6833	4.867	0.5472
4.87517	0.15245	4.87533	0.1557	4.87533	0.1097	4.87517	0.1913	4.875	0.6899	4.87533	0.5479
4.8835	0.15305	4.88367	0.15595	4.88367	0.11135	4.8835	0.1911	4.88333	0.69995	4.88367	0.54725
4.89183	0.1537	4.892	0.1569	4.892	0.11395	4.89183	0.19095	4.89167	0.70925	4.892	0.5475
4.90017	0.15255	4.90033	0.1575	4.90033	0.1142	4.90017	0.19355	4.9	0.7154	4.90033	0.5465
4.9085	0.154	4.90867	0.1569	4.90867	0.1158	4.9085	0.1961	4.90833	0.7215	4.90867	0.54695
4.91683	0.1551	4.917	0.15905	4.917	0.1178	4.91683	0.20105	4.91667	0.72595	4.917	0.54885
4.92517	0.1533	4.92533	0.15795	4.92533	0.116	4.92517	0.20535	4.925	0.72505	4.92533	0.54885
4.9335	0.1536	4.93367	0.1583	4.93367	0.1176	4.9335	0.21015	4.93333	0.7251	4.93367	0.55075
4.94183	0.15385	4.942	0.1581	4.942	0.1172	4.94183	0.2158	4.94167	0.72215	4.942	0.54985
4.95017	0.1531	4.95033	0.15825	4.95033	0.1154	4.95017	0.2217	4.95	0.7164	4.95033	0.5478
4.9585	0.15245	4.95867	0.1574	4.95867	0.11515	4.9585	0.22655	4.95833	0.7105	4.95867	0.54915
4.96683	0.1519	4.967	0.15715	4.967	0.1145	4.96683	0.2314	4.96667	0.7054	4.967	0.5485
4.97517	0.15095	4.97533	0.1562	4.97533	0.11215	4.97517	0.2329	4.975	0.699	4.97533	0.5453
4.9835	0.1499	4.98367	0.1548	4.98367	0.11255	4.9835	0.2343	4.98333	0.69405	4.98367	0.5438
4.99183	0.149	4.992	0.1543	4.992	0.11165	4.99183	0.23245	4.99167	0.6884	4.992	0.54355
5.00017	0.1502	5.00033	0.1544	5.00033	0.1117	5.00017	0.2336	5	0.6847	5.00033	0.5438
5.0085	0.152	5.00867	0.15475	5.00867	0.11305	5.0085	0.2333	5.00833	0.68245	5.00867	0.54195
5.01683	0.1486	5.017	0.1545	5.017	0.1116	5.01683	0.232	5.01667	0.6786	5.017	0.53875
5.02517	0.1494	5.02533	0.15375	5.02533	0.11385	5.02517	0.2289	5.025	0.67515	5.02533	0.53675
5.0335	0.14885	5.03367	0.1545	5.03367	0.1136	5.0335	0.2284	5.03333	0.6741	5.03367	0.53455
5.04183	0.1496	5.042	0.155	5.042	0.1146	5.04183	0.226	5.04167	0.6751	5.042	0.5339
5.05017	0.1476	5.05033	0.15395	5.05033	0.11145	5.05017	0.2259	5.05	0.6739	5.05033	0.53195
5.0585	0.1492	5.05867	0.1537	5.05867	0.1159	5.0585	0.2237	5.05833	0.67645	5.05867	0.53135
5.06683	0.15055	5.067	0.1533	5.067	0.11645	5.06683	0.2217	5.06667	0.6769	5.067	0.5294
5.07517	0.15145	5.07533	0.15515	5.07533	0.1181	5.07517	0.22145	5.075	0.68225	5.07533	0.5291
5.0835	0.1527	5.08367	0.1545	5.08367	0.1206	5.0835	0.2218	5.08333	0.68635	5.08367	0.5316
5.09183	0.1544	5.092	0.15705	5.092	0.1216	5.09183	0.22245	5.09167	0.69275	5.092	0.53315
5.10017	0.1576	5.10033	0.15665	5.10033	0.126	5.10017	0.22515	5.1	0.69575	5.10033	0.536
5.1085	0.16205	5.10867	0.1612	5.10867	0.12755	5.1085	0.22955	5.10833	0.70385	5.10867	0.54055
5.11683	0.16395	5.117	0.1614	5.117	0.12845	5.11683	0.232	5.11667	0.70715	5.117	0.5416
5.12517	0.1673	5.12533	0.16335	5.12533	0.1314	5.12517	0.23575	5.125	0.7118	5.12533	0.54735
5.1335	0.1688	5.13367	0.16525	5.13367	0.133	5.1335	0.23795	5.13333	0.71425	5.13367	0.54985
5.14183	0.17115	5.142	0.16675	5.142	0.1356	5.14183	0.24155	5.14167	0.7163	5.142	0.553
5.15017	0.1699	5.15033	0.16545	5.15033	0.1335	5.15017	0.24265	5.15	0.71505	5.15033	0.5536
5.1585	0.17315	5.15867	0.16725	5.15867	0.1348	5.1585	0.2468	5.15833	0.7176	5.15867	0.5565
5.16683	0.1731	5.167	0.16725	5.167	0.1364	5.16683	0.24905	5.16667	0.7179	5.167	0.55645
5.17517	0.1742	5.17533	0.1689	5.17533	0.13815	5.17517	0.2492	5.175	0.7189	5.17533	0.5588
5.1835	0.17625	5.18367	0.17055	5.18367	0.1396	5.1835	0.24975	5.18333	0.72055	5.18367	0.55925
5.19183	0.1748	5.192	0.1677	5.192	0.1375	5.19183	0.252	5.19167	0.7192	5.192	0.5558
5.20017	0.1758	5.20033	0.16865	5.20033	0.13955	5.20017	0.2563	5.2	0.7204	5.20033	0.5552
5.2085	0.1745	5.20867	0.1684	5.20867	0.139	5.2085	0.2597	5.20833	0.7191	5.20867	0.554
5.21683	0.1763	5.217	0.1706	5.217	0.1411	5.21683	0.26635	5.21667	0.7219	5.217	0.55445
5.22517	0.1774	5.22533	0.1706	5.22533	0.1418	5.22517	0.27515	5.225	0.72215	5.22533	0.553
5.2335	0.1779	5.23367	0.17255	5.23367	0.14405	5.2335	0.29025	5.23333	0.72365	5.23367	0.55185
5.24183	0.1762	5.242	0.1707	5.242	0.14455	5.24183	0.3054	5.24167	0.7229	5.242	0.54935
5.25017	0.17555	5.25033	0.17245	5.25033	0.1473	5.25017	0.32325	5.25	0.72475	5.25033	0.54845
5.2585	0.17555	5.25867	0.1726	5.25867	0.1505	5.2585	0.33885	5.25833	0.72565	5.25867	0.5476
5.26683	0.17505	5.267	0.1741	5.267	0.15535	5.26683	0.35555	5.26667	0.7276	5.267	0.54725
5.27517	0.1732	5.27533	0.1749	5.27533	0.15975	5.27517	0.36615	5.275	0.72855	5.27533	0.5467
5.2835	0.1731	5.28367	0.17825	5.28367	0.1661	5.2835	0.3725	5.28333	0.73125	5.28367	0.547
5.29183	0.1718	5.292	0.17755	5.292	0.1715	5.29183	0.37335	5.29167	0.731	5.292	0.54545
5.30017	0.17255	5.30033	0.1815	5.30033	0.17955	5.30017	0.3712	5.3	0.73525	5.30033	0.54765
5.3085	0.172	5.30867	0.1815	5.30867	0.18535	5.3085	0.3648	5.30833	0.73715	5.30867	0.5503
5.31683	0.1716	5.317	0.1826	5.317	0.18905	5.31683	0.3559	5.31667	0.7388	5.317	0.5505
5.32517	0.1713	5.32533	0.18185	5.32533	0.1913	5.32517	0.3461	5.325	0.7398	5.32533	0.5519
5.3335	0.17075	5.33367	0.1809	5.33367	0.19165	5.3335	0.3402	5.33333	0.73865	5.33367	0.55435
5.34183	0.1703	5.342	0.18065	5.342	0.19005	5.34183	0.33355	5.34167	0.74	5.342	0.556
5.35017	0.1694	5.35033	0.18035	5.35033	0.1876	5.35017	0.32875	5.35	0.74065	5.35033	0.5583
5.3585	0.1676	5.35867	0.17865	5.35867	0.18325	5.3585	0.32385	5.35833	0.74105	5.35867	0.55925
5.36683	0.16725	5.367	0.18065	5.367	0.18015	5.36683	0.32225	5.36667	0.7445	5.367	0.5614
5.37517	0.1658	5.37533	0.1759	5.37533	0.1755	5.37517	0.31865	5.375	0.74755	5.37533	0.5589
5.3835	0.1648	5.38367	0.1763	5.38367	0.173	5.3835	0.3159	5.38333	0.7523	5.38367	0.55955
5.39183	0.164	5.392	0.1779	5.392	0.173	5.39183	0.31635	5.39167	0.76025	5.392	0.56025
5.40017	0.1653	5.40033	0.18045	5.40033	0.17605	5.40017	0.3127	5.4	0.7715	5.40033	0.56535
5.4085	0.16405	5.40867	0.18505	5.40867	0.1825	5.4085	0.31135	5.40833	0.78685	5.40867	0.57365
5.41683	0.1659	5.417	0.19095	5.417	0.1943	5.41683	0.31015	5.41667	0.8071	5.417	0.59235
5.42517	0.16735	5.42533	0.19975	5.42533	0.211	5.42517	0.30875	5.425	0.8323	5.42533	0.6257
5.4335	0.1706	5.43367	0.20805	5.43367	0.2318	5.4335	0.3042	5.43333	0.85995	5.43367	0.6828
5.44183	0.1755	5.442	0.2187	5.442	0.25745	5.44183	0.3039	5.44167	0.88775	5.442	0.77135
5.45017	0.185	5.45033	0.2287	5.45033	0.2859	5.45017	0.30755	5.45	0.9146	5.45033	0.90175
5.4585	0.19365	5.45867	0.23875	5.45867	0.3135	5.4585	0.31365	5.45833	0.9346	5.45867	1.0743
5.46683	0.2072	5.467	0.24575	5.467	0.3351	5.46683	0.32335	5.46667	0.94905	5.467	1.29575
5.47517	0.2246	5.47533	0.2503	5.47533	0.35185	5.47517	0.34225	5.475	0.9568	5.47533	1.55305
5.4835	0.24275	5.48367	0.2515	5.48367	0.36215	5.4835	0.365	5.48333	0.95645	5.48367	1.83015
5.49183	0.2584	5.492	0.24795	5.492	0.3613	5.49183	0.3947	5.49167	0.94905	5.492	2.10105
5.50017	0.27335	5.50033	0.2429	5.50033	0.3571	5.50017	0.4256	5.5	0.93595	5.50033	2.3439
5.5085	0.28475	5.50867	0.23685	5.50867	0.3461	5.5085	0.46245	5.50833	0.9201	5.50867	2.52985
5.51683	0.2894	5.517	0.2264	5.517	0.33025	5.51683	0.492	5.51667	0.90255	5.517	2.6434
5.52517	0.29215	5.52533	0.2222	5.52533	0.31745	5.52517	0.51705	5.525	0.8882	5.52533	2.6831
5.5335	0.2899	5.53367	0.21615	5.53367	0.3026	5.5335	0.53685	5.53333	0.8735	5.53367	2.64775
5.54183	0.2816	5.542	0.2096	5.542	0.28915	5.54183	0.5479	5.54167	0.86105	5.542	2.5478
5.55017	0.2711	5.55033	0.2048	5.55033	0.2807	5.55017	0.5475	5.55	0.8499	5.55033	2.402
5.5585	0.25755	5.55867	0.20195	5.55867	0.27755	5.5585	0.5408	5.55833	0.84305	5.55867	2.2276
5.56683	0.2443	5.567	0.2004	5.567	0.2786	5.56683	0.53295	5.56667	0.8376	5.567	2.04145
5.57517	0.2307	5.57533	0.20005	5.57533	0.288	5.57517	0.5179	5.575	0.83545	5.57533	1.8546
5.5835	0.21805	5.58367	0.19845	5.58367	0.3036	5.5835	0.50165	5.58333	0.83475	5.58367	1.67655
5.59183	0.2077	5.592	0.2003	5.592	0.3253	5.59183	0.48735	5.59167	0.83775	5.592	1.514
5.60017	0.20045	5.60033	0.20245	5.60033	0.3507	5.60017	0.4691	5.6	0.8419	5.60033	1.37255
5.6085	0.19285	5.60867	0.20395	5.60867	0.3803	5.6085	0.453	5.60833	0.8452	5.60867	1.24735
5.61683	0.18655	5.617	0.2059	5.617	0.4081	5.61683	0.4398	5.61667	0.84815	5.617	1.14325
5.62517	0.18385	5.62533	0.2062	5.62533	0.4344	5.62517	0.4254	5.625	0.84895	5.62533	1.05695
5.6335	0.18085	5.63367	0.20655	5.63367	0.45645	5.6335	0.4141	5.63333	0.85055	5.63367	0.9871
5.64183	0.17865	5.642	0.206	5.642	0.47185	5.64183	0.4041	5.64167	0.849	5.642	0.92845
5.65017	0.17795	5.65033	0.20685	5.65033	0.48135	5.65017	0.3967	5.65	0.85045	5.65033	0.88545
5.6585	0.1796	5.65867	0.2067	5.65867	0.48505	5.6585	0.38755	5.65833	0.84725	5.65867	0.8499
5.66683	0.1821	5.667	0.20865	5.667	0.4876	5.66683	0.38355	5.66667	0.8459	5.667	0.8225
5.67517	0.18645	5.67533	0.21265	5.67533	0.4867	5.67517	0.37925	5.675	0.8426	5.67533	0.80135
5.6835	0.1916	5.68367	0.21675	5.68367	0.48375	5.6835	0.3746	5.68333	0.8374	5.68367	0.78345
5.69183	0.2008	5.692	0.22875	5.692	0.4837	5.69183	0.3738	5.69167	0.83595	5.692	0.76865
5.70017	0.2098	5.70033	0.24055	5.70033	0.4817	5.70017	0.37225	5.7	0.8332	5.70033	0.75505
5.7085	0.222	5.70867	0.25765	5.70867	0.47975	5.7085	0.3695	5.70833	0.83415	5.70867	0.7435
5.71683	0.23435	5.717	0.27715	5.717	0.47605	5.71683	0.36415	5.71667	0.8353	5.717	0.7337
5.72517	0.246	5.72533	0.2942	5.72533	0.4687	5.72517	0.36495	5.725	0.8375	5.72533	0.72185
5.7335	0.25465	5.73367	0.31265	5.73367	0.4587	5.7335	0.3604	5.73333	0.84405	5.73367	0.71055
5.74183	0.26255	5.742	0.32735	5.742	0.4462	5.74183	0.3589	5.74167	0.85355	5.742	0.69975
5.75017	0.26635	5.75033	0.33735	5.75033	0.431	5.75017	0.35525	5.75	0.86415	5.75033	0.68905
5.7585	0.2664	5.75867	0.34045	5.75867	0.4133	5.7585	0.3503	5.75833	0.87735	5.75867	0.67545
5.76683	0.25935	5.767	0.3377	5.767	0.39415	5.76683	0.34855	5.76667	0.89255	5.767	0.66395
5.77517	0.2537	5.77533	0.33305	5.77533	0.37525	5.77517	0.3473	5.775	0.91005	5.77533	0.6536
5.7835	0.2475	5.78367	0.32625	5.78367	0.36295	5.7835	0.34455	5.78333	0.9245	5.78367	0.6455
5.79183	0.23715	5.792	0.31515	5.792	0.34905	5.79183	0.3414	5.79167	0.93715	5.792	0.6366
5.80017	0.22645	5.80033	0.3045	5.80033	0.3382	5.80017	0.34155	5.8	0.94725	5.80033	0.63035
5.8085	0.21825	5.80867	0.29395	5.80867	0.33205	5.8085	0.3407	5.80833	0.9541	5.80867	0.63005
5.81683	0.21005	5.817	0.2822	5.817	0.32715	5.81683	0.34335	5.81667	0.95645	5.817	0.63085
5.82517	0.2035	5.82533	0.2739	5.82533	0.3248	5.82517	0.3425	5.825	0.9559	5.82533	0.63765
5.8335	0.1958	5.83367	0.26405	5.83367	0.3234	5.8335	0.3439	5.83333	0.95495	5.83367	0.65005
5.84183	0.1913	5.842	0.2561	5.842	0.32165	5.84183	0.3452	5.84167	0.95175	5.842	0.66755
5.85017	0.1893	5.85033	0.2517	5.85033	0.326	5.85017	0.3478	5.85	0.9492	5.85033	0.6938
5.8585	0.1852	5.85867	0.242	5.85867	0.3249	5.8585	0.35065	5.85833	0.9426	5.85867	0.7221
5.86683	0.18375	5.867	0.23755	5.867	0.3279	5.86683	0.353	5.86667	0.93865	5.867	0.75625
5.87517	0.1823	5.87533	0.23405	5.87533	0.32885	5.87517	0.3544	5.875	0.9353	5.87533	0.79285
5.8835	0.1826	5.88367	0.2292	5.88367	0.33225	5.8835	0.3569	5.88333	0.9298	5.88367	0.824
5.89183	0.18065	5.892	0.2252	5.892	0.33285	5.89183	0.3555	5.89167	0.9259	5.892	0.8502
5.90017	0.1799	5.90033	0.22395	5.90033	0.334	5.90017	0.35625	5.9	0.9222	5.90033	0.8678
5.9085	0.17875	5.90867	0.2205	5.90867	0.3358	5.9085	0.3571	5.90833	0.9183	5.90867	0.8793
5.91683	0.17955	5.917	0.22035	5.917	0.3409	5.91683	0.35885	5.91667	0.91695	5.917	0.88235
5.92517	0.17835	5.92533	0.21885	5.92533	0.3461	5.92517	0.3547	5.925	0.91505	5.92533	0.879
5.9335	0.17505	5.93367	0.2169	5.93367	0.35135	5.9335	0.35385	5.93333	0.9127	5.93367	0.8664
5.94183	0.17335	5.942	0.2162	5.942	0.359	5.94183	0.3516	5.94167	0.91155	5.942	0.8514
5.95017	0.1726	5.95033	0.21695	5.95033	0.36855	5.95017	0.35095	5.95	0.91065	5.95033	0.8345
5.9585	0.1693	5.95867	0.2157	5.95867	0.376	5.9585	0.3485	5.95833	0.9099	5.95867	0.81495
5.96683	0.1695	5.967	0.21885	5.967	0.3866	5.96683	0.3471	5.96667	0.90965	5.967	0.7988
5.97517	0.16755	5.97533	0.22085	5.97533	0.39435	5.97517	0.3452	5.975	0.91185	5.97533	0.7826
5.9835	0.1662	5.98367	0.2192	5.98367	0.4007	5.9835	0.345	5.98333	0.9122	5.98367	0.7647
5.99183	0.16475	5.992	0.2186	5.992	0.40525	5.99183	0.34345	5.99167	0.91325	5.992	0.75035
6.00017	0.16425	6.00033	0.22035	6.00033	0.40785	6.00017	0.3442	6	0.91535	6.00033	0.7383
6.0085	0.16355	6.00867	0.21785	6.00867	0.40825	6.0085	0.3442	6.00833	0.9145	6.00867	0.7266
6.01683	0.1624	6.017	0.218	6.017	0.40925	6.01683	0.3463	6.01667	0.91605	6.017	0.7181
6.02517	0.16175	6.02533	0.21985	6.02533	0.40865	6.02517	0.3475	6.025	0.91975	6.02533	0.71265
6.0335	0.16345	6.03367	0.219	6.03367	0.408	6.0335	0.35295	6.03333	0.9211	6.03367	0.7089
6.04183	0.16235	6.042	0.2198	6.042	0.40695	6.04183	0.35665	6.04167	0.9243	6.042	0.70415
6.05017	0.16365	6.05033	0.21975	6.05033	0.40805	6.05017	0.36185	6.05	0.9285	6.05033	0.70345
6.0585	0.1657	6.05867	0.2202	6.05867	0.4056	6.0585	0.37085	6.05833	0.93045	6.05867	0.70095
6.06683	0.16395	6.067	0.2186	6.067	0.4035	6.06683	0.3768	6.06667	0.933	6.067	0.698
6.07517	0.1633	6.07533	0.21795	6.07533	0.4021	6.07517	0.38545	6.075	0.935	6.07533	0.69455
6.0835	0.1638	6.08367	0.21965	6.08367	0.4008	6.0835	0.396	6.08333	0.93895	6.08367	0.6934
6.09183	0.1627	6.092	0.21905	6.092	0.3984	6.09183	0.40755	6.09167	0.9407	6.092	0.69105
6.10017	0.16235	6.10033	0.22035	6.10033	0.39795	6.10017	0.418	6.1	0.94555	6.10033	0.68835
6.1085	0.1606	6.10867	0.2205	6.10867	0.3977	6.1085	0.43005	6.10833	0.94915	6.10867	0.68485
6.11683	0.1566	6.117	0.22295	6.117	0.39935	6.11683	0.43985	6.11667	0.95305	6.117	0.6828
6.12517	0.1584	6.12533	0.22525	6.12533	0.4034	6.12517	0.4504	6.125	0.959	6.12533	0.6834
6.1335	0.1563	6.13367	0.2249	6.13367	0.4069	6.1335	0.4604	6.13333	0.96155	6.13367	0.6805
6.14183	0.1564	6.142	0.2275	6.142	0.4125	6.14183	0.47155	6.14167	0.96665	6.142	0.6804
6.15017	0.1565	6.15033	0.2305	6.15033	0.42065	6.15017	0.4817	6.15	0.97195	6.15033	0.6831
6.1585	0.15795	6.15867	0.23315	6.15867	0.42915	6.1585	0.48745	6.15833	0.97885	6.15867	0.6853
6.16683	0.1562	6.167	0.2334	6.167	0.43625	6.16683	0.4973	6.16667	0.9801	6.167	0.6879
6.17517	0.15675	6.17533	0.23595	6.17533	0.4446	6.17517	0.5056	6.175	0.98495	6.17533	0.6914
6.1835	0.1543	6.18367	0.2348	6.18367	0.4509	6.1835	0.5127	6.18333	0.98705	6.18367	0.69535
6.19183	0.15775	6.192	0.2358	6.192	0.45815	6.19183	0.52075	6.19167	0.99175	6.192	0.70395
6.20017	0.15765	6.20033	0.23515	6.20033	0.4607	6.20017	0.52915	6.2	0.99355	6.20033	0.70865
6.2085	0.159	6.20867	0.23615	6.20867	0.46425	6.2085	0.5349	6.20833	0.99815	6.20867	0.7167
6.21683	0.15795	6.217	0.2367	6.217	0.463	6.21683	0.54575	6.21667	1.0006	6.217	0.7236
6.22517	0.16035	6.22533	0.23605	6.22533	0.4622	6.22517	0.55395	6.225	1.0031	6.22533	0.72995
6.2335	0.16015	6.23367	0.23565	6.23367	0.4567	6.2335	0.5699	6.23333	1.0044	6.23367	0.73485
6.24183	0.16145	6.242	0.23575	6.242	0.4531	6.24183	0.58215	6.24167	1.00925	6.242	0.74245
6.25017	0.16035	6.25033	0.2352	6.25033	0.4452	6.25017	0.60475	6.25	1.01015	6.25033	0.745
6.2585	0.16055	6.25867	0.2349	6.25867	0.4369	6.2585	0.63775	6.25833	1.01405	6.25867	0.74855
6.26683	0.1577	6.267	0.234	6.267	0.4279	6.26683	0.69915	6.26667	1.0168	6.267	0.7489
6.27517	0.1575	6.27533	0.2338	6.27533	0.4177	6.27517	0.8161	6.275	1.02005	6.27533	0.74925
6.2835	0.1541	6.28367	0.23365	6.28367	0.4095	6.2835	1.0462	6.28333	1.0234	6.28367	0.74815
6.29183	0.1525	6.292	0.2335	6.292	0.3991	6.29183	1.46185	6.29167	1.0255	6.292	0.74745
6.30017	0.1511	6.30033	0.23395	6.30033	0.391	6.30017	2.13835	6.3	1.0308	6.30033	0.7453
6.3085	0.1474	6.30867	0.23575	6.30867	0.38495	6.3085	3.13905	6.30833	1.037	6.30867	0.7445
6.31683	0.14755	6.317	0.2381	6.317	0.3806	6.31683	4.47545	6.31667	1.0441	6.317	0.74295
6.32517	0.1447	6.32533	0.2371	6.32533	0.37575	6.32517	6.1028	6.325	1.04925	6.32533	0.7411
6.3335	0.14165	6.33367	0.23815	6.33367	0.3724	6.3335	7.93605	6.33333	1.05575	6.33367	0.73795
6.34183	0.1412	6.342	0.24065	6.342	0.37225	6.34183	9.84745	6.34167	1.0639	6.342	0.7379
6.35017	0.141	6.35033	0.2428	6.35033	0.37405	6.35017	11.7224	6.35	1.0727	6.35033	0.7395
6.3585	0.1394	6.35867	0.2461	6.35867	0.3785	6.3585	13.4559	6.35833	1.08225	6.35867	0.73935
6.36683	0.1363	6.367	0.24705	6.367	0.3844	6.36683	14.9749	6.36667	1.0907	6.367	0.73975
6.37517	0.13585	6.37533	0.2515	6.37533	0.39675	6.37517	16.2542	6.375	1.1032	6.37533	0.7432
6.3835	0.13425	6.38367	0.25485	6.38367	0.4152	6.3835	17.2989	6.38333	1.11285	6.38367	0.74505
6.39183	0.13205	6.392	0.2591	6.392	0.43985	6.39183	18.1228	6.39167	1.12655	6.392	0.75015
6.40017	0.13345	6.40033	0.26455	6.40033	0.47435	6.40017	18.7622	6.4	1.1424	6.40033	0.75785
6.4085	0.134	6.40867	0.2713	6.40867	0.51755	6.4085	19.2393	6.40833	1.159	6.40867	0.7664
6.41683	0.13325	6.417	0.2752	6.417	0.56935	6.41683	19.5824	6.41667	1.174	6.417	0.774
6.42517	0.13365	6.42533	0.2795	6.42533	0.6253	6.42517	19.8058	6.425	1.18625	6.42533	0.7857
6.4335	0.1331	6.43367	0.28545	6.43367	0.68415	6.4335	19.9274	6.43333	1.1973	6.43367	0.7985
6.44183	0.13425	6.442	0.29115	6.442	0.74125	6.44183	19.9567	6.44167	1.2088	6.442	0.81655
6.45017	0.1328	6.45033	0.29395	6.45033	0.7907	6.45017	19.9061	6.45	1.2137	6.45033	0.83405
6.4585	0.13435	6.45867	0.29985	6.45867	0.8288	6.4585	19.7797	6.45833	1.2188	6.45867	0.85945
6.46683	0.13595	6.467	0.30395	6.467	0.8517	6.46683	19.5951	6.46667	1.2225	6.467	0.88475
6.47517	0.136	6.47533	0.3082	6.47533	0.8608	6.47517	19.3595	6.475	1.22225	6.47533	0.9126
6.4835	0.13625	6.48367	0.31	6.48367	0.85605	6.4835	19.0827	6.48333	1.22265	6.48367	0.9427
6.49183	0.13745	6.492	0.31475	6.492	0.8423	6.49183	18.7662	6.49167	1.22245	6.492	0.97155
6.50017	0.1401	6.50033	0.317	6.50033	0.82025	6.50017	18.4127	6.5	1.2218	6.50033	1.001
6.5085	0.13895	6.50867	0.3186	6.50867	0.78955	6.5085	18.0391	6.50833	1.22025	6.50867	1.02295
6.51683	0.1418	6.517	0.3214	6.517	0.7578	6.51683	17.6495	6.51667	1.2212	6.517	1.0459
6.52517	0.1411	6.52533	0.32465	6.52533	0.72295	6.52517	17.2456	6.525	1.22395	6.52533	1.0626
6.5335	0.14225	6.53367	0.3294	6.53367	0.69125	6.5335	16.8339	6.53333	1.2265	6.53367	1.0772
6.54183	0.1417	6.542	0.33305	6.542	0.65615	6.54183	16.4218	6.54167	1.22825	6.542	1.0913
6.55017	0.1411	6.55033	0.3377	6.55033	0.62555	6.55017	16.0028	6.55	1.2329	6.55033	1.10425
6.5585	0.1407	6.55867	0.34185	6.55867	0.59395	6.5585	15.5814	6.55833	1.2381	6.55867	1.1189
6.56683	0.13875	6.567	0.3455	6.567	0.56525	6.56683	15.1546	6.56667	1.24145	6.567	1.13145
6.57517	0.13805	6.57533	0.3513	6.57533	0.54065	6.57517	14.7364	6.575	1.2498	6.57533	1.1481
6.5835	0.1362	6.58367	0.35775	6.58367	0.5161	6.5835	14.3215	6.58333	1.25525	6.58367	1.16485
6.59183	0.1343	6.592	0.36545	6.592	0.49715	6.59183	13.9153	6.59167	1.2633	6.592	1.18605
6.60017	0.1341	6.60033	0.37385	6.60033	0.48165	6.60017	13.5241	6.6	1.27485	6.60033	1.2097
6.6085	0.13285	6.60867	0.3829	6.60867	0.4688	6.6085	13.1421	6.60833	1.28545	6.60867	1.2366
6.61683	0.1313	6.617	0.39445	6.617	0.45905	6.61683	12.7735	6.61667	1.29765	6.617	1.26565
6.62517	0.1305	6.62533	0.40945	6.62533	0.45195	6.62517	12.4198	6.625	1.3128	6.62533	1.2975
6.6335	0.1303	6.63367	0.4331	6.63367	0.4498	6.6335	12.0844	6.63333	1.33275	6.63367	1.33295
6.64183	0.12865	6.642	0.48125	6.642	0.45075	6.64183	11.7651	6.64167	1.35615	6.642	1.36835
6.65017	0.1273	6.65033	0.59975	6.65033	0.45455	6.65017	11.4586	6.65	1.3947	6.65033	1.4108
6.6585	0.12815	6.65867	0.87505	6.65867	0.46505	6.6585	11.1653	6.65833	1.4569	6.65867	1.45525
6.66683	0.1263	6.667	1.45825	6.667	0.47695	6.66683	10.8844	6.66667	1.56385	6.667	1.50275
6.67517	0.12645	6.67533	2.5377	6.67533	0.492	6.67517	10.622	6.675	1.74315	6.67533	1.55385
6.6835	0.12705	6.68367	4.27875	6.68367	0.51155	6.6835	10.3629	6.68333	2.03655	6.68367	1.6134
6.69183	0.1275	6.692	6.78305	6.692	0.53445	6.69183	10.112	6.69167	2.46995	6.692	1.68045
6.70017	0.1271	6.70033	10.0158	6.70033	0.56535	6.70017	9.8716	6.7	3.0487	6.70033	1.76335
6.7085	0.12735	6.70867	13.7994	6.70867	0.6127	6.7085	9.6416	6.70833	3.75155	6.70867	1.8686
6.71683	0.12825	6.717	17.8481	6.717	0.6939	6.71683	9.42025	6.71667	4.53145	6.717	2.01675
6.72517	0.13035	6.72533	21.7881	6.72533	0.836	6.72517	9.20625	6.725	5.3276	6.72533	2.24125
6.7335	0.1312	6.73367	25.2626	6.73367	1.05865	6.7335	9.00125	6.73333	6.071	6.73367	2.59145
6.74183	0.12945	6.742	27.9942	6.742	1.37325	6.74183	8.8054	6.74167	6.71465	6.742	3.13215
6.75017	0.13065	6.75033	29.819	6.75033	1.77705	6.75017	8.61325	6.75	7.2285	6.75033	3.93625
6.7585	0.1312	6.75867	30.6936	6.75867	2.23985	6.7585	8.4288	6.75833	7.60485	6.75867	5.0613
6.76683	0.1297	6.767	30.7117	6.767	2.7279	6.76683	8.25175	6.76667	7.8457	6.767	6.5204
6.77517	0.13	6.77533	30.0215	6.77533	3.20335	6.77517	8.08085	6.775	7.97495	6.77533	8.2747
6.7835	0.1315	6.78367	28.8132	6.78367	3.6324	6.7835	7.91695	6.78333	8.01255	6.78367	10.2323
6.79183	0.13325	6.792	27.253	6.792	3.9942	6.79183	7.75725	6.79167	7.98135	6.792	12.2585
6.80017	0.1334	6.80033	25.501	6.80033	4.27975	6.80017	7.6033	6.8	7.89315	6.80033	14.2018
6.8085	0.13965	6.80867	23.6744	6.80867	4.49345	6.8085	7.44795	6.80833	7.77175	6.80867	15.9358
6.81683	0.14615	6.817	21.8573	6.817	4.63495	6.81683	7.2968	6.81667	7.6239	6.817	17.3624
6.82517	0.1555	6.82533	20.1044	6.82533	4.71395	6.82517	7.1463	6.825	7.45925	6.82533	18.4454
6.8335	0.1681	6.83367	18.4586	6.83367	4.74225	6.8335	6.99905	6.83333	7.28475	6.83367	19.1483
6.84183	0.1872	6.842	16.9343	6.842	4.72825	6.84183	6.8499	6.84167	7.11055	6.842	19.5234
6.85017	0.20825	6.85033	15.5467	6.85033	4.6787	6.85017	6.70885	6.85	6.93555	6.85033	19.6114
6.8585	0.23265	6.85867	14.2871	6.85867	4.60205	6.8585	6.57135	6.85833	6.76535	6.85867	19.4733
6.86683	0.2552	6.867	13.1509	6.867	4.50445	6.86683	6.4337	6.86667	6.6008	6.867	19.1526
6.87517	0.27915	6.87533	12.1447	6.87533	4.39625	6.87517	6.2994	6.875	6.4509	6.87533	18.7102
6.8835	0.2992	6.88367	11.2393	6.88367	4.2755	6.8835	6.1685	6.88333	6.30695	6.88367	18.1776
6.89183	0.3163	6.892	10.4286	6.892	4.15355	6.89183	6.04245	6.89167	6.17885	6.892	17.5871
6.90017	0.32965	6.90033	9.70585	6.90033	4.03105	6.90017	5.9168	6.9	6.06375	6.90033	16.9652
6.9085	0.33675	6.90867	9.06495	6.90867	3.91205	6.9085	5.7973	6.90833	5.96105	6.90867	16.3376
6.91683	0.34235	6.917	8.4909	6.917	3.8006	6.91683	5.68145	6.91667	5.87075	6.917	15.7192
6.92517	0.3443	6.92533	7.98375	6.92533	3.70765	6.92517	5.56695	6.925	5.79395	6.92533	15.1235
6.9335	0.34315	6.93367	7.5281	6.93367	3.63245	6.9335	5.4551	6.93333	5.72235	6.93367	14.553
6.94183	0.33825	6.942	7.12265	6.942	3.58545	6.94183	5.34865	6.94167	5.6573	6.942	14.0196
6.95017	0.33415	6.95033	6.7592	6.95033	3.5786	6.95017	5.24355	6.95	5.5945	6.95033	13.5205
6.9585	0.3269	6.95867	6.4285	6.95867	3.61315	6.9585	5.14095	6.95833	5.52895	6.95867	13.0539
6.96683	0.3184	6.967	6.12815	6.967	3.6964	6.96683	5.03955	6.96667	5.46165	6.967	12.6214
6.97517	0.3116	6.97533	5.85175	6.97533	3.8297	6.97517	4.9449	6.975	5.38575	6.97533	12.2189
6.9835	0.30545	6.98367	5.5953	6.98367	3.9987	6.9835	4.84965	6.98333	5.30375	6.98367	11.8447
6.99183	0.2954	6.992	5.3507	6.992	4.1819	6.99183	4.7578	6.99167	5.20785	6.992	11.4921
7.00017	0.28545	7.00033	5.1171	7.00033	4.35595	7.00017	4.66785	7	5.103	7.00033	11.1659
7.0085	0.27735	7.00867	4.8954	7.00867	4.49335	7.0085	4.58045	7.00833	4.98915	7.00867	10.8653
7.01683	0.26915	7.017	4.68365	7.017	4.56635	7.01683	4.49455	7.01667	4.87245	7.017	10.5886
7.02517	0.2606	7.02533	4.48155	7.02533	4.5567	7.02517	4.40965	7.025	4.74965	7.02533	10.3303
7.0335	0.2558	7.03367	4.29155	7.03367	4.46595	7.0335	4.3288	7.03333	4.63015	7.03367	10.1004
7.04183	0.25065	7.042	4.10875	7.042	4.2969	7.04183	4.2502	7.04167	4.50965	7.042	9.88355
7.05017	0.24795	7.05033	3.9384	7.05033	4.07445	7.05017	4.1706	7.05	4.3962	7.05033	9.681
7.0585	0.24535	7.05867	3.78045	7.05867	3.81825	7.0585	4.09445	7.05833	4.29125	7.05867	9.48295
7.06683	0.24435	7.067	3.6347	7.067	3.5525	7.06683	4.0179	7.06667	4.1955	7.067	9.28495
7.07517	0.2435	7.07533	3.49605	7.07533	3.2893	7.07517	3.946	7.075	4.1018	7.07533	9.07625
7.0835	0.2411	7.08367	3.3661	7.08367	3.04655	7.0835	3.8739	7.08333	4.0182	7.08367	8.85715
7.09183	0.238	7.092	3.2504	7.092	2.82835	7.09183	3.8009	7.09167	3.94315	7.092	8.63
7.10017	0.23245	7.10033	3.13905	7.10033	2.6362	7.10017	3.73415	7.1	3.87245	7.10033	8.3936
7.1085	0.2268	7.10867	3.03445	7.10867	2.47195	7.1085	3.6683	7.10833	3.81035	7.10867	8.156
7.11683	0.2158	7.117	2.93865	7.117	2.3353	7.11683	3.6029	7.11667	3.75235	7.117	7.9193
7.12517	0.21015	7.12533	2.84875	7.12533	2.2251	7.12517	3.5385	7.125	3.70085	7.12533	7.68955
7.1335	0.2013	7.13367	2.76085	7.13367	2.13425	7.1335	3.4752	7.13333	3.6508	7.13367	7.4681
7.14183	0.19325	7.142	2.6791	7.142	2.065	7.14183	3.41255	7.14167	3.6037	7.142	7.25695
7.15017	0.1859	7.15033	2.60375	7.15033	2.01145	7.15017	3.3518	7.15	3.5616	7.15033	7.05765
7.1585	0.1791	7.15867	2.5301	7.15867	1.96835	7.1585	3.2931	7.15833	3.51905	7.15867	6.87045
7.16683	0.17365	7.167	2.46045	7.167	1.93655	7.16683	3.2355	7.16667	3.4801	7.167	6.6952
7.17517	0.1683	7.17533	2.395	7.17533	1.9114	7.17517	3.1787	7.175	3.44295	7.17533	6.53115
7.1835	0.16585	7.18367	2.3334	7.18367	1.889	7.1835	3.1225	7.18333	3.40605	7.18367	6.37875
7.19183	0.16215	7.192	2.2722	7.192	1.8684	7.19183	3.066	7.19167	3.36885	7.192	6.2349
7.20017	0.1586	7.20033	2.21485	7.20033	1.84935	7.20017	3.01185	7.2	3.33455	7.20033	6.1039
7.2085	0.15505	7.20867	2.16035	7.20867	1.82625	7.2085	2.95885	7.20833	3.29885	7.20867	5.9772
7.21683	0.1528	7.217	2.10875	7.217	1.8012	7.21683	2.90585	7.21667	3.2649	7.217	5.8585
7.22517	0.15145	7.22533	2.0594	7.22533	1.7723	7.22517	2.85525	7.225	3.23255	7.22533	5.7471
7.2335	0.1482	7.23367	2.0114	7.23367	1.73925	7.2335	2.80615	7.23333	3.1994	7.23367	5.63985
7.24183	0.148	7.242	1.96675	7.242	1.70435	7.24183	2.75935	7.24167	3.16845	7.242	5.53705
7.25017	0.1473	7.25033	1.9231	7.25033	1.66775	7.25017	2.7093	7.25	3.1393	7.25033	5.43735
7.2585	0.1473	7.25867	1.88425	7.25867	1.6262	7.2585	2.66405	7.25833	3.1098	7.25867	5.34385
7.26683	0.14565	7.267	1.84405	7.267	1.58125	7.26683	2.6182	7.26667	3.0797	7.267	5.2491
7.27517	0.14555	7.27533	1.8074	7.27533	1.53425	7.27517	2.5726	7.275	3.0527	7.27533	5.1556
7.2835	0.1451	7.28367	1.7698	7.28367	1.4858	7.2835	2.52845	7.28333	3.02545	7.28367	5.06475
7.29183	0.1434	7.292	1.7367	7.292	1.4388	7.29183	2.48745	7.29167	3.0008	7.292	4.9739
7.30017	0.14205	7.30033	1.7031	7.30033	1.39105	7.30017	2.44575	7.3	2.974	7.30033	4.8858
7.3085	0.14035	7.30867	1.67135	7.30867	1.34395	7.3085	2.40745	7.30833	2.9518	7.30867	4.79655
7.31683	0.1394	7.317	1.6414	7.317	1.303	7.31683	2.3653	7.31667	2.93005	7.317	4.71205
7.32517	0.138	7.32533	1.61155	7.32533	1.26585	7.32517	2.3258	7.325	2.9098	7.32533	4.6269
7.3335	0.1352	7.33367	1.5845	7.33367	1.23455	7.3335	2.286	7.33333	2.88895	7.33367	4.5428
7.34183	0.1348	7.342	1.5585	7.342	1.21015	7.34183	2.24695	7.34167	2.87155	7.342	4.4609
7.35017	0.1344	7.35033	1.534	7.35033	1.1934	7.35017	2.2115	7.35	2.85365	7.35033	4.37935
7.3585	0.13395	7.35867	1.5101	7.35867	1.1809	7.3585	2.17455	7.35833	2.83705	7.35867	4.30255
7.36683	0.13235	7.367	1.48465	7.367	1.17155	7.36683	2.137	7.36667	2.8222	7.367	4.2256
7.37517	0.13155	7.37533	1.4612	7.37533	1.1636	7.37517	2.10505	7.375	2.80395	7.37533	4.15095
7.3835	0.13265	7.38367	1.44135	7.38367	1.1597	7.3835	2.06995	7.38333	2.7901	7.38367	4.08635
7.39183	0.13085	7.392	1.41945	7.392	1.14945	7.39183	2.0365	7.39167	2.77455	7.392	4.0189
7.40017	0.13245	7.40033	1.4002	7.40033	1.13875	7.40017	2.0046	7.4	2.76035	7.40033	3.9571
7.4085	0.13215	7.40867	1.38025	7.40867	1.12075	7.4085	1.97525	7.40833	2.7457	7.40867	3.89695
7.41683	0.13145	7.417	1.36025	7.417	1.0993	7.41683	1.9483	7.41667	2.7319	7.417	3.8364
7.42517	0.1324	7.42533	1.34195	7.42533	1.07385	7.42517	1.9215	7.425	2.71915	7.42533	3.7819
7.4335	0.13525	7.43367	1.3275	7.43367	1.0482	7.4335	1.89315	7.43333	2.70825	7.43367	3.72865
7.44183	0.13485	7.442	1.31015	7.442	1.02175	7.44183	1.86405	7.44167	2.69595	7.442	3.6772
7.45017	0.1377	7.45033	1.29485	7.45033	0.99475	7.45017	1.8364	7.45	2.6847	7.45033	3.62665
7.4585	0.13845	7.45867	1.2775	7.45867	0.96745	7.4585	1.80905	7.45833	2.6707	7.45867	3.574
7.46683	0.1417	7.467	1.26265	7.467	0.9433	7.46683	1.78045	7.46667	2.66005	7.467	3.5225
7.47517	0.142	7.47533	1.2472	7.47533	0.91925	7.47517	1.74915	7.475	2.64865	7.47533	3.47235
7.4835	0.1436	7.48367	1.23265	7.48367	0.8982	7.4835	1.721	7.48333	2.6363	7.48367	3.42195
7.49183	0.145	7.492	1.21955	7.492	0.8774	7.49183	1.69035	7.49167	2.62635	7.492	3.3752
7.50017	0.14525	7.50033	1.2032	7.50033	0.8582	7.50017	1.66055	7.5	2.6121	7.50033	3.3274
7.5085	0.14765	7.50867	1.18995	7.50867	0.83985	7.5085	1.6315	7.50833	2.60365	7.50867	3.2829
7.51683	0.1461	7.517	1.17705	7.517	0.82275	7.51683	1.603	7.51667	2.59245	7.517	3.23705
7.52517	0.14585	7.52533	1.1615	7.52533	0.80405	7.52517	1.57385	7.525	2.58045	7.52533	3.19165
7.5335	0.14505	7.53367	1.149	7.53367	0.78675	7.5335	1.5458	7.53333	2.5703	7.53367	3.148
7.54183	0.1451	7.542	1.13545	7.542	0.77125	7.54183	1.5173	7.54167	2.5593	7.542	3.10485
7.55017	0.14615	7.55033	1.1223	7.55033	0.75445	7.55017	1.4931	7.55	2.54865	7.55033	3.0635
7.5585	0.14465	7.55867	1.1093	7.55867	0.7391	7.5585	1.4673	7.55833	2.53875	7.55867	3.021
7.56683	0.1434	7.567	1.0967	7.567	0.7232	7.56683	1.44105	7.56667	2.5279	7.567	2.98175
7.57517	0.14125	7.57533	1.0839	7.57533	0.70855	7.57517	1.41795	7.575	2.518	7.57533	2.94295
7.5835	0.14025	7.58367	1.07	7.58367	0.695	7.5835	1.39335	7.58333	2.5077	7.58367	2.9029
7.59183	0.13895	7.592	1.0584	7.592	0.6811	7.59183	1.3694	7.59167	2.49795	7.592	2.86505
7.60017	0.13795	7.60033	1.0469	7.60033	0.6682	7.60017	1.3456	7.6	2.4896	7.60033	2.8289
7.6085	0.13675	7.60867	1.0363	7.60867	0.6555	7.6085	1.32605	7.60833	2.481	7.60867	2.79005
7.61683	0.13545	7.617	1.02745	7.617	0.645	7.61683	1.30195	7.61667	2.47405	7.617	2.75385
7.62517	0.13475	7.62533	1.019	7.62533	0.63735	7.62517	1.27995	7.625	2.4663	7.62533	2.72015
7.6335	0.13225	7.63367	1.0087	7.63367	0.62735	7.6335	1.259	7.63333	2.4544	7.63367	2.6834
7.64183	0.12995	7.642	1.00165	7.642	0.62	7.64183	1.2403	7.64167	2.4466	7.642	2.64945
7.65017	0.12905	7.65033	0.9929	7.65033	0.6166	7.65017	1.2194	7.65	2.44065	7.65033	2.6156
7.6585	0.12645	7.65867	0.98295	7.65867	0.6105	7.6585	1.2001	7.65833	2.43205	7.65867	2.58135
7.66683	0.1268	7.667	0.97455	7.667	0.60715	7.66683	1.1828	7.66667	2.4247	7.667	2.54955
7.67517	0.12395	7.67533	0.9654	7.67533	0.60475	7.67517	1.1638	7.675	2.4183	7.67533	2.51745
7.6835	0.1223	7.68367	0.9566	7.68367	0.6003	7.6835	1.1438	7.68333	2.4114	7.68367	2.48575
7.69183	0.12445	7.692	0.9507	7.692	0.59895	7.69183	1.12435	7.69167	2.40575	7.692	2.4589
7.70017	0.12295	7.70033	0.9415	7.70033	0.597	7.70017	1.10845	7.7	2.40035	7.70033	2.43075
7.7085	0.1216	7.70867	0.93265	7.70867	0.5946	7.7085	1.09095	7.70833	2.3941	7.70867	2.4033
7.71683	0.1222	7.717	0.9264	7.717	0.59355	7.71683	1.07385	7.71667	2.3907	7.717	2.3793
7.72517	0.1222	7.72533	0.91825	7.72533	0.5938	7.72517	1.05795	7.725	2.3826	7.72533	2.3544
7.7335	0.1229	7.73367	0.9098	7.73367	0.59385	7.7335	1.0419	7.73333	2.37605	7.73367	2.3304
7.74183	0.124	7.742	0.90335	7.742	0.59575	7.74183	1.02555	7.74167	2.37	7.742	2.3064
7.75017	0.1233	7.75033	0.89505	7.75033	0.59755	7.75017	1.0112	7.75	2.3638	7.75033	2.28375
7.7585	0.1215	7.75867	0.8862	7.75867	0.5981	7.7585	0.9957	7.75833	2.35685	7.75867	2.25985
7.76683	0.123	7.767	0.88045	7.767	0.6006	7.76683	0.97965	7.76667	2.3509	7.767	2.2383
7.77517	0.12285	7.77533	0.87265	7.77533	0.6008	7.77517	0.96595	7.775	2.3425	7.77533	2.21665
7.7835	0.1233	7.78367	0.8656	7.78367	0.60065	7.7835	0.9527	7.78333	2.3338	7.78367	2.1965
7.79183	0.12095	7.792	0.85795	7.792	0.59745	7.79183	0.9375	7.79167	2.32585	7.792	2.1765
7.80017	0.12155	7.80033	0.8513	7.80033	0.5941	7.80017	0.9244	7.8	2.3187	7.80033	2.1594
7.8085	0.1221	7.80867	0.84625	7.80867	0.59025	7.8085	0.90875	7.80833	2.31195	7.80867	2.14275
7.81683	0.1227	7.817	0.83945	7.817	0.5848	7.81683	0.8967	7.81667	2.3037	7.817	2.12525
7.82517	0.12145	7.82533	0.8316	7.82533	0.5773	7.82517	0.88355	7.825	2.2961	7.82533	2.1085
7.8335	0.1226	7.83367	0.8282	7.83367	0.5725	7.8335	0.8709	7.83333	2.2907	7.83367	2.09235
7.84183	0.12015	7.842	0.82165	7.842	0.56535	7.84183	0.85905	7.84167	2.28355	7.842	2.0754
7.85017	0.1228	7.85033	0.81715	7.85033	0.56415	7.85017	0.8442	7.85	2.2795	7.85033	2.0578
7.8585	0.12155	7.85867	0.81205	7.85867	0.5679	7.8585	0.8325	7.85833	2.2746	7.85867	2.03795
7.86683	0.12055	7.867	0.8081	7.867	0.57795	7.86683	0.81985	7.86667	2.2712	7.867	2.01565
7.87517	0.11955	7.87533	0.8019	7.87533	0.6008	7.87517	0.80825	7.875	2.26695	7.87533	1.994
7.8835	0.1198	7.88367	0.799	7.88367	0.6418	7.8835	0.79545	7.88333	2.264	7.88367	1.9734
7.89183	0.12035	7.892	0.7958	7.892	0.705	7.89183	0.7848	7.89167	2.2636	7.892	1.9509
7.90017	0.1207	7.90033	0.7949	7.90033	0.7928	7.90017	0.7723	7.9	2.26215	7.90033	1.9318
7.9085	0.1183	7.90867	0.79095	7.90867	0.90915	7.9085	0.76175	7.90833	2.2588	7.90867	1.90905
7.91683	0.1198	7.917	0.78985	7.917	1.05485	7.91683	0.7514	7.91667	2.2584	7.917	1.89125
7.92517	0.12065	7.92533	0.78725	7.92533	1.22015	7.92517	0.74165	7.925	2.2562	7.92533	1.8739
7.9335	0.12135	7.93367	0.7843	7.93367	1.39865	7.9335	0.73125	7.93333	2.25275	7.93367	1.85875
7.94183	0.11965	7.942	0.77935	7.942	1.58015	7.94183	0.7219	7.94167	2.24745	7.942	1.8452
7.95017	0.1203	7.95033	0.7742	7.95033	1.7464	7.95017	0.71115	7.95	2.2406	7.95033	1.8363
7.9585	0.1209	7.95867	0.7671	7.95867	1.8876	7.9585	0.7021	7.95833	2.23445	7.95867	1.8293
7.96683	0.1234	7.967	0.76145	7.967	1.99265	7.96683	0.6903	7.96667	2.22835	7.967	1.82965
7.97517	0.1213	7.97533	0.754	7.97533	2.057	7.97517	0.68255	7.975	2.2202	7.97533	1.82935
7.9835	0.1218	7.98367	0.7451	7.98367	2.0786	7.9835	0.67105	7.98333	2.2113	7.98367	1.8315
7.99183	0.1234	7.992	0.73715	7.992	2.06185	7.99183	0.66365	7.99167	2.2023	7.992	1.835
8.00017	0.12405	8.00033	0.7318	8.00033	2.0104	8.00017	0.65155	8	2.1954	8.00033	1.83795
8.0085	0.12565	8.00867	0.7234	8.00867	1.933	8.0085	0.6436	8.00833	2.18485	8.00867	1.8387
8.01683	0.1263	8.017	0.71615	8.017	1.8348	8.01683	0.635	8.01667	2.1759	8.017	1.83575
8.02517	0.12795	8.02533	0.70825	8.02533	1.72255	8.02517	0.62725	8.025	2.16515	8.02533	1.82795
8.0335	0.1297	8.03367	0.70355	8.03367	1.60435	8.0335	0.61995	8.03333	2.1577	8.03367	1.81945
8.04183	0.12835	8.042	0.6983	8.042	1.4827	8.04183	0.61345	8.04167	2.14765	8.042	1.8048
8.05017	0.12805	8.05033	0.69185	8.05033	1.359	8.05017	0.60745	8.05	2.13925	8.05033	1.78585
8.0585	0.1283	8.05867	0.68735	8.05867	1.24085	8.0585	0.60055	8.05833	2.1311	8.05867	1.7659
8.06683	0.128	8.067	0.6824	8.067	1.13275	8.06683	0.59445	8.06667	2.12425	8.067	1.74515
8.07517	0.12615	8.07533	0.6775	8.07533	1.03085	8.07517	0.5882	8.075	2.1151	8.07533	1.71845
8.0835	0.125	8.08367	0.67115	8.08367	0.9404	8.0835	0.5831	8.08333	2.106	8.08367	1.6933
8.09183	0.1233	8.092	0.6679	8.092	0.85895	8.09183	0.57695	8.09167	2.10155	8.092	1.66765
8.10017	0.1228	8.10033	0.66355	8.10033	0.78995	8.10017	0.56705	8.1	2.09315	8.10033	1.64135
8.1085	0.12145	8.10867	0.65935	8.10867	0.73125	8.1085	0.5634	8.10833	2.0876	8.10867	1.61625
8.11683	0.12235	8.117	0.6562	8.117	0.68	8.11683	0.5581	8.11667	2.08015	8.117	1.5902
8.12517	0.121	8.12533	0.6527	8.12533	0.63685	8.12517	0.55175	8.125	2.07505	8.12533	1.5686
8.1335	0.11965	8.13367	0.6476	8.13367	0.60075	8.1335	0.5456	8.13333	2.068	8.13367	1.5442
8.14183	0.1175	8.142	0.6418	8.142	0.5693	8.14183	0.53935	8.14167	2.06165	8.142	1.52085
8.15017	0.1185	8.15033	0.6404	8.15033	0.5456	8.15017	0.5315	8.15	2.0574	8.15033	1.5011
8.1585	0.1161	8.15867	0.634	8.15867	0.5234	8.1585	0.5261	8.15833	2.05045	8.15867	1.48115
8.16683	0.11505	8.167	0.6321	8.167	0.50395	8.16683	0.52235	8.16667	2.04605	8.167	1.4623
8.17517	0.1131	8.17533	0.6263	8.17533	0.4879	8.17517	0.51845	8.175	2.04235	8.17533	1.4458
8.1835	0.11455	8.18367	0.6248	8.18367	0.47725	8.1835	0.5132	8.18333	2.03985	8.18367	1.43215
8.19183	0.1143	8.192	0.6191	8.192	0.46535	8.19183	0.5071	8.19167	2.0362	8.192	1.41695
8.20017	0.11365	8.20033	0.6154	8.20033	0.45465	8.20017	0.50325	8.2	2.0326	8.20033	1.40255
8.2085	0.11435	8.20867	0.6123	8.20867	0.44595	8.2085	0.4993	8.20833	2.02875	8.20867	1.3919
8.21683	0.11355	8.217	0.60755	8.217	0.43965	8.21683	0.49495	8.21667	2.02505	8.217	1.37815
8.22517	0.11445	8.22533	0.60685	8.22533	0.4344	8.22517	0.4899	8.225	2.0228	8.22533	1.3685
8.2335	0.11515	8.23367	0.6027	8.23367	0.4271	8.2335	0.4837	8.23333	2.01725	8.23367	1.35595
8.24183	0.11515	8.242	0.59915	8.242	0.42185	8.24183	0.4795	8.24167	2.01415	8.242	1.3439
8.25017	0.11565	8.25033	0.5958	8.25033	0.41665	8.25017	0.47415	8.25	2.00915	8.25033	1.3344
8.2585	0.11405	8.25867	0.5914	8.25867	0.4127	8.2585	0.4674	8.25833	2.00665	8.25867	1.32175
8.26683	0.1142	8.267	0.58915	8.267	0.40575	8.26683	0.46405	8.26667	2.00025	8.267	1.31225
8.27517	0.1131	8.27533	0.5852	8.27533	0.4	8.27517	0.46215	8.275	1.99435	8.27533	1.30145
8.2835	0.11515	8.28367	0.58465	8.28367	0.397	8.2835	0.46295	8.28333	1.9916	8.28367	1.29235
8.29183	0.11535	8.292	0.58115	8.292	0.39325	8.29183	0.46275	8.29167	1.98635	8.292	1.2825
8.30017	0.11655	8.30033	0.58095	8.30033	0.39	8.30017	0.4657	8.3	1.98205	8.30033	1.27505
8.3085	0.11585	8.30867	0.57785	8.30867	0.3873	8.3085	0.47415	8.30833	1.97565	8.30867	1.2663
8.31683	0.11705	8.317	0.5752	8.317	0.38335	8.31683	0.48735	8.31667	1.971	8.317	1.2599
8.32517	0.11735	8.32533	0.5729	8.32533	0.3823	8.32517	0.50315	8.325	1.9674	8.32533	1.2516
8.3335	0.1186	8.33367	0.57125	8.33367	0.3794	8.3335	0.5236	8.33333	1.9625	8.33367	1.2435
8.34183	0.11725	8.342	0.5671	8.342	0.3776	8.34183	0.54395	8.34167	1.9572	8.342	1.23625
8.35017	0.11695	8.35033	0.5643	8.35033	0.3732	8.35017	0.56405	8.35	1.95	8.35033	1.2278
8.3585	0.11805	8.35867	0.56475	8.35867	0.37165	8.3585	0.58	8.35833	1.94665	8.35867	1.2227
8.36683	0.1197	8.367	0.5626	8.367	0.3713	8.36683	0.59055	8.36667	1.9425	8.367	1.2173
8.37517	0.12015	8.37533	0.562	8.37533	0.37155	8.37517	0.5942	8.375	1.93885	8.37533	1.21145
8.3835	0.12135	8.38367	0.56065	8.38367	0.37065	8.3835	0.5917	8.38333	1.93255	8.38367	1.2062
8.39183	0.12155	8.392	0.5571	8.392	0.3708	8.39183	0.58205	8.39167	1.92595	8.392	1.1996
8.40017	0.122	8.40033	0.5537	8.40033	0.3736	8.40017	0.56705	8.4	1.9209	8.40033	1.196
8.4085	0.12555	8.40867	0.55395	8.40867	0.37725	8.4085	0.54665	8.40833	1.9175	8.40867	1.1931
8.41683	0.1273	8.417	0.55145	8.417	0.3826	8.41683	0.52465	8.41667	1.914	8.417	1.1902
8.42517	0.12695	8.42533	0.54725	8.42533	0.3855	8.42517	0.5009	8.425	1.90705	8.42533	1.1855
8.4335	0.1288	8.43367	0.54575	8.43367	0.3906	8.4335	0.47865	8.43333	1.9019	8.43367	1.18355
8.44183	0.1297	8.442	0.5428	8.442	0.3967	8.44183	0.4556	8.44167	1.89675	8.442	1.1802
8.45017	0.13105	8.45033	0.5379	8.45033	0.40205	8.45017	0.43565	8.45	1.8891	8.45033	1.17555
8.4585	0.1302	8.45867	0.5354	8.45867	0.4091	8.4585	0.4172	8.45833	1.88125	8.45867	1.17285
8.46683	0.1311	8.467	0.5326	8.467	0.41735	8.46683	0.40105	8.46667	1.8769	8.467	1.17285
8.47517	0.13225	8.47533	0.5301	8.47533	0.42665	8.47517	0.38665	8.475	1.8711	8.47533	1.1703
8.4835	0.13345	8.48367	0.52625	8.48367	0.43535	8.4835	0.37445	8.48333	1.8647	8.48367	1.16705
8.49183	0.1331	8.492	0.5232	8.492	0.4466	8.49183	0.36265	8.49167	1.8564	8.492	1.16325
8.50017	0.1337	8.50033	0.5212	8.50033	0.4604	8.50017	0.35425	8.5	1.85055	8.50033	1.16045
8.5085	0.1343	8.50867	0.51845	8.50867	0.4789	8.5085	0.34705	8.50833	1.8441	8.50867	1.1592
8.51683	0.13475	8.517	0.51395	8.517	0.49745	8.51683	0.34235	8.51667	1.83715	8.517	1.15335
8.52517	0.1335	8.52533	0.5109	8.52533	0.52005	8.52517	0.3322	8.525	1.83095	8.52533	1.14765
8.5335	0.1344	8.53367	0.5083	8.53367	0.54145	8.5335	0.3273	8.53333	1.82485	8.53367	1.1419
8.54183	0.13465	8.542	0.506	8.542	0.5653	8.54183	0.32205	8.54167	1.8196	8.542	1.1347
8.55017	0.13595	8.55033	0.50515	8.55033	0.5839	8.55017	0.31565	8.55	1.8148	8.55033	1.1268
8.5585	0.13665	8.55867	0.5027	8.55867	0.59875	8.5585	0.31315	8.55833	1.81	8.55867	1.1172
8.56683	0.13605	8.567	0.5	8.567	0.60385	8.56683	0.3111	8.56667	1.8046	8.567	1.1062
8.57517	0.13665	8.57533	0.4988	8.57533	0.6045	8.57517	0.30695	8.575	1.7995	8.57533	1.09765
8.5835	0.13655	8.58367	0.4972	8.58367	0.5967	8.5835	0.3038	8.58333	1.7943	8.58367	1.08885
8.59183	0.13595	8.592	0.49435	8.592	0.58135	8.59183	0.3005	8.59167	1.78775	8.592	1.07825
8.60017	0.13785	8.60033	0.49545	8.60033	0.5648	8.60017	0.29675	8.6	1.7857	8.60033	1.07015
8.6085	0.1369	8.60867	0.49265	8.60867	0.54155	8.6085	0.29645	8.60833	1.7772	8.60867	1.0611
8.61683	0.13675	8.617	0.4905	8.617	0.51635	8.61683	0.2913	8.61667	1.77175	8.617	1.05245
8.62517	0.1369	8.62533	0.49015	8.62533	0.4926	8.62517	0.28895	8.625	1.76715	8.62533	1.0456
8.6335	0.1367	8.63367	0.4872	8.63367	0.469	8.6335	0.2855	8.63333	1.76195	8.63367	1.0388
8.64183	0.1367	8.642	0.48515	8.642	0.44665	8.64183	0.28085	8.64167	1.753	8.642	1.03025
8.65017	0.13525	8.65033	0.4816	8.65033	0.4259	8.65017	0.27875	8.65	1.74715	8.65033	1.02335
8.6585	0.1368	8.65867	0.4793	8.65867	0.408	8.6585	0.2763	8.65833	1.7405	8.65867	1.0178
8.66683	0.1382	8.667	0.4759	8.667	0.3943	8.66683	0.2736	8.66667	1.7349	8.667	1.01205
8.67517	0.1376	8.67533	0.4747	8.67533	0.38275	8.67517	0.27005	8.675	1.72765	8.67533	1.0069
8.6835	0.1383	8.68367	0.46935	8.68367	0.37315	8.6835	0.26855	8.68333	1.72205	8.68367	1.00125
8.69183	0.14135	8.692	0.4691	8.692	0.3654	8.69183	0.2644	8.69167	1.71875	8.692	0.9979
8.70017	0.14045	8.70033	0.46355	8.70033	0.35965	8.70017	0.262	8.7	1.71055	8.70033	0.9911
8.7085	0.13955	8.70867	0.4591	8.70867	0.35375	8.7085	0.25845	8.70833	1.7036	8.70867	0.98365
8.71683	0.14085	8.717	0.45635	8.717	0.3525	8.71683	0.2557	8.71667	1.69945	8.717	0.9788
8.72517	0.1407	8.72533	0.4547	8.72533	0.3515	8.72517	0.2528	8.725	1.6952	8.72533	0.97435
8.7335	0.14045	8.73367	0.45185	8.73367	0.3522	8.7335	0.2508	8.73333	1.68895	8.73367	0.96815
8.74183	0.13885	8.742	0.449	8.742	0.35195	8.74183	0.24645	8.74167	1.68385	8.742	0.96135
8.75017	0.1382	8.75033	0.44475	8.75033	0.35485	8.75017	0.2435	8.75	1.68175	8.75033	0.9615
8.7585	0.137	8.75867	0.4416	8.75867	0.3562	8.7585	0.23965	8.75833	1.6754	8.75867	0.95035
8.76683	0.1356	8.767	0.439	8.767	0.35865	8.76683	0.23785	8.76667	1.67135	8.767	0.9458
8.77517	0.1326	8.77533	0.4359	8.77533	0.35715	8.77517	0.2334	8.775	1.66855	8.77533	0.94015
8.7835	0.13255	8.78367	0.4351	8.78367	0.3599	8.7835	0.2316	8.78333	1.66845	8.78367	0.93575
8.79183	0.1318	8.792	0.43355	8.792	0.36025	8.79183	0.23125	8.79167	1.66815	8.792	0.9304
8.80017	0.1302	8.80033	0.42985	8.80033	0.3596	8.80017	0.2284	8.8	1.66855	8.80033	0.92515
8.8085	0.1277	8.80867	0.42765	8.80867	0.3582	8.8085	0.2258	8.80833	1.6698	8.80867	0.91915
8.81683	0.12605	8.817	0.426	8.817	0.35725	8.81683	0.22355	8.81667	1.67605	8.817	0.9163
8.82517	0.1259	8.82533	0.42495	8.82533	0.3552	8.82517	0.2217	8.825	1.6845	8.82533	0.91335
8.8335	0.12465	8.83367	0.42425	8.83367	0.3545	8.8335	0.2204	8.83333	1.69645	8.83367	0.90945
8.84183	0.1226	8.842	0.42585	8.842	0.35515	8.84183	0.2188	8.84167	1.7129	8.842	0.9067
8.85017	0.12145	8.85033	0.42825	8.85033	0.362	8.85017	0.2155	8.85	1.7314	8.85033	0.90445
8.8585	0.121	8.85867	0.43205	8.85867	0.374	8.8585	0.215	8.85833	1.75255	8.85867	0.9025
8.86683	0.12075	8.867	0.44035	8.867	0.4004	8.86683	0.21225	8.86667	1.77315	8.867	0.9023
8.87517	0.11905	8.87533	0.45195	8.87533	0.4413	8.87517	0.21085	8.875	1.7938	8.87533	0.9013
8.8835	0.1189	8.88367	0.46635	8.88367	0.50985	8.8835	0.20945	8.88333	1.8118	8.88367	0.9031
8.89183	0.11825	8.892	0.48535	8.892	0.6067	8.89183	0.2062	8.89167	1.8256	8.892	0.90605
8.90017	0.11425	8.90033	0.50415	8.90033	0.74075	8.90017	0.2049	8.9	1.83145	8.90033	0.90805
8.9085	0.1166	8.90867	0.52815	8.90867	0.92015	8.9085	0.2026	8.90833	1.83225	8.90867	0.91815
8.91683	0.1153	8.917	0.54945	8.917	1.1351	8.91683	0.20175	8.91667	1.82475	8.917	0.9312
8.92517	0.11545	8.92533	0.5659	8.92533	1.38275	8.92517	0.20075	8.925	1.8087	8.92533	0.94905
8.9335	0.1159	8.93367	0.58285	8.93367	1.65075	8.9335	0.19645	8.93333	1.78945	8.93367	0.98005
8.94183	0.1181	8.942	0.5909	8.942	1.9158	8.94183	0.1944	8.94167	1.76635	8.942	1.01955
8.95017	0.1205	8.95033	0.59185	8.95033	2.15725	8.95017	0.19355	8.95	1.73715	8.95033	1.0686
8.9585	0.1245	8.95867	0.58845	8.95867	2.3548	8.9585	0.19315	8.95833	1.711	8.95867	1.1298
8.96683	0.12885	8.967	0.57805	8.967	2.48735	8.96683	0.1919	8.96667	1.68205	8.967	1.20015
8.97517	0.1379	8.97533	0.5651	8.97533	2.5495	8.97517	0.19065	8.975	1.6558	8.97533	1.2782
8.9835	0.14625	8.98367	0.54685	8.98367	2.5355	8.9835	0.19035	8.98333	1.63175	8.98367	1.3516
8.99183	0.15765	8.992	0.5278	8.992	2.45395	8.99183	0.19015	8.99167	1.6113	8.992	1.4206
9.00017	0.1693	9.00033	0.50675	9.00033	2.3184	9.00017	0.18715	9	1.59345	9.00033	1.47645
9.0085	0.18075	9.00867	0.48865	9.00867	2.14145	9.0085	0.1855	9.00833	1.57695	9.00867	1.5111
9.01683	0.1895	9.017	0.4693	9.017	1.9389	9.01683	0.1852	9.01667	1.5604	9.017	1.52375
9.02517	0.1966	9.02533	0.4527	9.02533	1.7292	9.02517	0.1816	9.025	1.54705	9.02533	1.51455
9.0335	0.2034	9.03367	0.4392	9.03367	1.5246	9.0335	0.1796	9.03333	1.53555	9.03367	1.48615
9.04183	0.20525	9.042	0.4271	9.042	1.3309	9.04183	0.17855	9.04167	1.527	9.042	1.4409
9.05017	0.2031	9.05033	0.41445	9.05033	1.15315	9.05017	0.17705	9.05	1.5161	9.05033	1.3829
9.0585	0.19945	9.05867	0.4058	9.05867	0.99735	9.0585	0.1766	9.05833	1.5089	9.05867	1.32035
9.06683	0.1916	9.067	0.3956	9.067	0.85935	9.06683	0.17545	9.06667	1.49875	9.067	1.2514
9.07517	0.18645	9.07533	0.38995	9.07533	0.7448	9.07517	0.17455	9.075	1.4936	9.07533	1.1876
9.0835	0.1777	9.08367	0.3851	9.08367	0.64515	9.0835	0.17575	9.08333	1.48665	9.08367	1.1258
9.09183	0.16565	9.092	0.3803	9.092	0.5595	9.09183	0.1725	9.09167	1.4809	9.092	1.07005
9.10017	0.15755	9.10033	0.37455	9.10033	0.4897	9.10017	0.17215	9.1	1.47355	9.10033	1.0203
9.1085	0.1505	9.10867	0.3724	9.10867	0.4309	9.1085	0.17225	9.10833	1.4695	9.10867	0.9786
9.11683	0.1422	9.117	0.36835	9.117	0.383	9.11683	0.16905	9.11667	1.46465	9.117	0.94145
9.12517	0.13585	9.12533	0.36465	9.12533	0.34505	9.12517	0.1676	9.125	1.4584	9.12533	0.90965
9.1335	0.13085	9.13367	0.3613	9.13367	0.31365	9.1335	0.1684	9.13333	1.45205	9.13367	0.88185
9.14183	0.1263	9.142	0.35915	9.142	0.2923	9.14183	0.165	9.14167	1.44715	9.142	0.86155
9.15017	0.12165	9.15033	0.3575	9.15033	0.27395	9.15017	0.16315	9.15	1.4428	9.15033	0.84235
9.1585	0.119	9.15867	0.3549	9.15867	0.2615	9.1585	0.1636	9.15833	1.43775	9.15867	0.8284
9.16683	0.1181	9.167	0.35485	9.167	0.2549	9.16683	0.1614	9.16667	1.43355	9.167	0.81585
9.17517	0.11455	9.17533	0.3534	9.17533	0.2494	9.17517	0.1624	9.175	1.42775	9.17533	0.80435
9.1835	0.11305	9.18367	0.3504	9.18367	0.2467	9.1835	0.1615	9.18333	1.4223	9.18367	0.79475
9.19183	0.1109	9.192	0.34975	9.192	0.2464	9.19183	0.15855	9.19167	1.41815	9.192	0.78795
9.20017	0.1094	9.20033	0.34685	9.20033	0.244	9.20017	0.15815	9.2	1.4122	9.20033	0.78045
9.2085	0.1078	9.20867	0.34545	9.20867	0.24585	9.2085	0.15735	9.20833	1.4065	9.20867	0.77355
9.21683	0.1084	9.217	0.34445	9.217	0.24555	9.21683	0.15525	9.21667	1.40245	9.217	0.76885
9.22517	0.1075	9.22533	0.3424	9.22533	0.24675	9.22517	0.1558	9.225	1.39675	9.22533	0.76445
9.2335	0.109	9.23367	0.3428	9.23367	0.24855	9.2335	0.15475	9.23333	1.39245	9.23367	0.76015
9.24183	0.1098	9.242	0.34285	9.242	0.25	9.24183	0.15485	9.24167	1.3904	9.242	0.7576
9.25017	0.1086	9.25033	0.34015	9.25033	0.2479	9.25017	0.1538	9.25	1.3838	9.25033	0.7525
9.2585	0.10805	9.25867	0.3372	9.25867	0.2476	9.2585	0.15175	9.25833	1.37965	9.25867	0.74825
9.26683	0.10835	9.267	0.3381	9.267	0.24615	9.26683	0.1492	9.26667	1.37645	9.267	0.74545
9.27517	0.10785	9.27533	0.3363	9.27533	0.24505	9.27517	0.14905	9.275	1.3728	9.27533	0.7424
9.2835	0.106	9.28367	0.33275	9.28367	0.2405	9.2835	0.14755	9.28333	1.36545	9.28367	0.73695
9.29183	0.10615	9.292	0.3327	9.292	0.23935	9.29183	0.14675	9.29167	1.3631	9.292	0.7339
9.30017	0.105	9.30033	0.3304	9.30033	0.23715	9.30017	0.14405	9.3	1.35965	9.30033	0.73045
9.3085	0.10575	9.30867	0.33125	9.30867	0.2357	9.3085	0.1423	9.30833	1.36025	9.30867	0.7271
9.31683	0.1053	9.317	0.3277	9.317	0.2315	9.31683	0.141	9.31667	1.35635	9.317	0.7235
9.32517	0.1064	9.32533	0.3269	9.32533	0.2308	9.32517	0.13855	9.325	1.35415	9.32533	0.72165
9.3335	0.10445	9.33367	0.3234	9.33367	0.22805	9.3335	0.1383	9.33333	1.35095	9.33367	0.7154
9.34183	0.1048	9.342	0.32435	9.342	0.22695	9.34183	0.1372	9.34167	1.35195	9.342	0.7122
9.35017	0.1036	9.35033	0.3221	9.35033	0.22445	9.35017	0.13485	9.35	1.35075	9.35033	0.71065
9.3585	0.10455	9.35867	0.3217	9.35867	0.2228	9.3585	0.13425	9.35833	1.35375	9.35867	0.7094
9.36683	0.1025	9.367	0.3191	9.367	0.21995	9.36683	0.1331	9.36667	1.35425	9.367	0.70615
9.37517	0.10335	9.37533	0.319	9.37533	0.21855	9.37517	0.13095	9.375	1.3578	9.37533	0.70445
9.3835	0.10465	9.38367	0.31745	9.38367	0.2183	9.3835	0.13015	9.38333	1.3614	9.38367	0.7056
9.39183	0.10135	9.392	0.31385	9.392	0.2157	9.39183	0.12785	9.39167	1.36245	9.392	0.70205
9.40017	0.10305	9.40033	0.3143	9.40033	0.21435	9.40017	0.1264	9.4	1.3651	9.40033	0.7028
9.4085	0.10265	9.40867	0.31385	9.40867	0.21335	9.4085	0.12455	9.40833	1.3687	9.40867	0.70435
9.41683	0.1018	9.417	0.3117	9.417	0.2134	9.41683	0.12245	9.41667	1.3667	9.417	0.70795
9.42517	0.1015	9.42533	0.31095	9.42533	0.2145	9.42517	0.12205	9.425	1.36415	9.42533	0.70975
9.4335	0.1016	9.43367	0.3095	9.43367	0.21725	9.4335	0.1206	9.43333	1.36045	9.43367	0.7139
9.44183	0.10345	9.442	0.30945	9.442	0.22155	9.44183	0.12155	9.44167	1.35575	9.442	0.7209
9.45017	0.1029	9.45033	0.3086	9.45033	0.22655	9.45017	0.1204	9.45	1.34715	9.45033	0.7289
9.4585	0.10085	9.45867	0.3066	9.45867	0.23045	9.4585	0.1197	9.45833	1.3378	9.45867	0.7353
9.46683	0.1014	9.467	0.3065	9.467	0.2369	9.46683	0.11795	9.46667	1.32805	9.467	0.7448
9.47517	0.1012	9.47533	0.30245	9.47533	0.2445	9.47517	0.1191	9.475	1.31825	9.47533	0.75485
9.4835	0.1022	9.48367	0.3014	9.48367	0.2539	9.4835	0.11865	9.48333	1.31075	9.48367	0.76815
9.49183	0.1004	9.492	0.3014	9.492	0.2608	9.49183	0.11815	9.49167	1.30015	9.492	0.78295
9.50017	0.10235	9.50033	0.30075	9.50033	0.26685	9.50017	0.1196	9.5	1.2933	9.50033	0.7971
9.5085	0.1023	9.50867	0.29815	9.50867	0.2717	9.5085	0.11975	9.50833	1.28465	9.50867	0.81315
9.51683	0.1022	9.517	0.29735	9.517	0.2745	9.51683	0.12125	9.51667	1.27845	9.517	0.8281
9.52517	0.1001	9.52533	0.2941	9.52533	0.2725	9.52517	0.12185	9.525	1.2702	9.52533	0.83855
9.5335	0.1014	9.53367	0.29425	9.53367	0.27235	9.5335	0.1242	9.53333	1.2671	9.53367	0.8481
9.54183	0.1023	9.542	0.2942	9.542	0.26955	9.54183	0.1242	9.54167	1.25925	9.542	0.85335
9.55017	0.1024	9.55033	0.2933	9.55033	0.2632	9.55017	0.1272	9.55	1.25485	9.55033	0.85325
9.5585	0.1016	9.55867	0.291	9.55867	0.25635	9.5585	0.1271	9.55833	1.2489	9.55867	0.84775
9.56683	0.1024	9.567	0.29055	9.567	0.24875	9.56683	0.12615	9.56667	1.2434	9.567	0.83945
9.57517	0.10255	9.57533	0.2896	9.57533	0.2404	9.57517	0.12895	9.575	1.23895	9.57533	0.8248
9.5835	0.10235	9.58367	0.28925	9.58367	0.2324	9.5835	0.12675	9.58333	1.23545	9.58367	0.8095
9.59183	0.10095	9.592	0.2869	9.592	0.2248	9.59183	0.1287	9.59167	1.229	9.592	0.79025
9.60017	0.1026	9.60033	0.28825	9.60033	0.21815	9.60017	0.12695	9.6	1.2246	9.60033	0.77115
9.6085	0.1013	9.60867	0.2877	9.60867	0.21065	9.6085	0.1302	9.60833	1.22	9.60867	0.7531
9.61683	0.10185	9.617	0.28695	9.617	0.2053	9.61683	0.1304	9.61667	1.2158	9.617	0.7366
9.62517	0.10085	9.62533	0.28665	9.62533	0.20095	9.62517	0.1296	9.625	1.2137	9.62533	0.7194
9.6335	0.10015	9.63367	0.2839	9.63367	0.1943	9.6335	0.1305	9.63333	1.20935	9.63367	0.7038
9.64183	0.1009	9.642	0.2839	9.642	0.1922	9.64183	0.12995	9.64167	1.20725	9.642	0.6898
9.65017	0.09965	9.65033	0.2844	9.65033	0.1886	9.65017	0.13285	9.65	1.20465	9.65033	0.67735
9.6585	0.10075	9.65867	0.283	9.65867	0.1854	9.6585	0.1338	9.65833	1.2032	9.65867	0.66765
9.66683	0.1005	9.667	0.28175	9.667	0.18195	9.66683	0.13915	9.66667	1.2022	9.667	0.65775
9.67517	0.10125	9.67533	0.2816	9.67533	0.17935	9.67517	0.14755	9.675	1.2025	9.67533	0.6505
9.6835	0.1019	9.68367	0.28075	9.68367	0.17795	9.6835	0.16045	9.68333	1.2028	9.68367	0.64535
9.69183	0.10075	9.692	0.27885	9.692	0.1748	9.69183	0.18825	9.69167	1.20355	9.692	0.64105
9.70017	0.10015	9.70033	0.2771	9.70033	0.17265	9.70017	0.2199	9.7	1.20085	9.70033	0.63505
9.7085	0.1012	9.70867	0.2781	9.70867	0.1713	9.7085	0.2224	9.70833	1.2042	9.70867	0.63255
9.71683	0.1008	9.717	0.2754	9.717	0.16805	9.71683	0.2017	9.71667	1.20285	9.717	0.62625
9.72517	0.10185	9.72533	0.2753	9.72533	0.16795	9.72517	0.1746	9.725	1.2044	9.72533	0.62595
9.7335	0.1021	9.73367	0.27635	9.73367	0.1671	9.7335	0.15575	9.73333	1.20485	9.73367	0.62275
9.74183	0.103	9.742	0.27485	9.742	0.1639	9.74183	0.14015	9.74167	1.20255	9.742	0.61965
9.75017	0.10245	9.75033	0.2735	9.75033	0.16445	9.75017	0.11555	9.75	1.2004	9.75033	0.61945
9.7585	0.10195	9.75867	0.2735	9.75867	0.16365	9.7585	0.07015	9.75833	1.19935	9.75867	0.61575
9.76683	0.1041	9.767	0.273	9.767	0.1655	9.76683	0.02715	9.76667	1.19555	9.767	0.61585
9.77517	0.1028	9.77533	0.27055	9.77533	0.16215	9.77517	0.3771	9.775	1.19185	9.77533	0.61355
9.7835	0.1017	9.78367	0.2703	9.78367	0.1614	9.7835	1.12345	9.78333	1.1863	9.78367	0.6121
9.79183	0.10345	9.792	0.26995	9.792	0.1616	9.79183	1.86245	9.79167	1.18185	9.792	0.6107
9.80017	0.10265	9.80033	0.2688	9.80033	0.1624	9.80017	2.42855	9.8	1.1759	9.80033	0.60945
9.8085	0.10285	9.80867	0.269	9.80867	0.16375	9.8085	2.83805	9.80833	1.1714	9.80867	0.6076
9.81683	0.10055	9.817	0.2668	9.817	0.16315	9.81683	3.1638	9.81667	1.16535	9.817	0.6075
9.82517	0.10285	9.82533	0.26805	9.82533	0.16645	9.82517	3.4495	9.825	1.1611	9.82533	0.60785
9.8335	0.101	9.83367	0.26545	9.83367	0.16855	9.8335	3.69365	9.83333	1.1536	9.83367	0.6045
9.84183	0.10095	9.842	0.2658	9.842	0.1694	9.84183	3.87705	9.84167	1.14895	9.842	0.6056
9.85017	0.10015	9.85033	0.26335	9.85033	0.17	9.85017	4.0062	9.85	1.14395	9.85033	0.60255
9.8585	0.10175	9.85867	0.26405	9.85867	0.17285	9.8585	4.0963	9.85833	1.1407	9.85867	0.60355
9.86683	0.1009	9.867	0.26435	9.867	0.17385	9.86683	4.15555	9.86667	1.13565	9.867	0.60365
9.87517	0.101	9.87533	0.2628	9.87533	0.17475	9.87517	4.1981	9.875	1.1326	9.87533	0.6024
9.8835	0.10275	9.88367	0.26265	9.88367	0.17535	9.8835	4.2314	9.88333	1.13115	9.88367	0.602
9.89183	0.10145	9.892	0.2606	9.892	0.17505	9.89183	4.2546	9.89167	1.12715	9.892	0.601
9.90017	0.10075	9.90033	0.25935	9.90033	0.17255	9.90017	4.2727	9.9	1.1233	9.90033	0.5977
9.9085	0.1019	9.90867	0.25945	9.90867	0.17405	9.9085	4.2885	9.90833	1.12305	9.90867	0.598
9.91683	0.103	9.917	0.259	9.917	0.1711	9.91683	4.29645	9.91667	1.12135	9.917	0.59465
9.92517	0.10435	9.92533	0.25995	9.92533	0.17085	9.92517	4.30375	9.925	1.1217	9.92533	0.59375
9.9335	0.10255	9.93367	0.2595	9.93367	0.1694	9.9335	4.30515	9.93333	1.11865	9.93367	0.59135
9.94183	0.10375	9.942	0.2581	9.942	0.16965	9.94183	4.30755	9.94167	1.11735	9.942	0.5887
9.95017	0.10675	9.95033	0.2575	9.95033	0.1714	9.95017	4.3083	9.95	1.1149	9.95033	0.5865
9.9585	0.105	9.95867	0.25695	9.95867	0.17185	9.9585	4.30905	9.95833	1.1112	9.95867	0.58505
9.96683	0.10615	9.967	0.2567	9.967	0.17485	9.96683	4.30715	9.96667	1.1076	9.967	0.5837
9.97517	0.10825	9.97533	0.25625	9.97533	0.18135	9.97517	4.3052	9.975	1.1046	9.97533	0.58335
9.9835	0.10875	9.98367	0.25625	9.98367	0.19015	9.9835	4.30625	9.98333	1.0998	9.98367	0.58335
9.99183	0.10745	9.992	0.2556	9.992	0.20035	9.99183	4.30625	9.99167	1.09425	9.992	0.58355
10.0002	0.10805	10.0003	0.25475	10.0003	0.21465	10.0002	4.3042	10	1.0883	10.0003	0.584
10.0085	0.10815	10.0087	0.25565	10.0087	0.23315	10.0085	4.3039	10.0083	1.0836	10.0087	0.58705
10.0168	0.10815	10.017	0.2553	10.017	0.2538	10.0168	4.3014	10.0167	1.0776	10.017	0.58735
10.0252	0.1066	10.0253	0.2543	10.0253	0.2758	10.0252	4.2976	10.025	1.07295	10.0253	0.5906
10.0335	0.1068	10.0337	0.2549	10.0337	0.29785	10.0335	4.29675	10.0333	1.06925	10.0337	0.59455
10.0418	0.1073	10.042	0.2553	10.042	0.32145	10.0418	4.29105	10.0417	1.066	10.042	0.59835
10.0502	0.10645	10.0503	0.2557	10.0503	0.34195	10.0502	4.2854	10.05	1.0633	10.0503	0.60125
10.0585	0.10715	10.0587	0.2567	10.0587	0.3584	10.0585	4.2757	10.0583	1.0615	10.0587	0.6066
10.0668	0.10575	10.067	0.25585	10.067	0.3701	10.0668	4.26985	10.0667	1.05775	10.067	0.60885
10.0752	0.1066	10.0753	0.25675	10.0753	0.37575	10.0752	4.26195	10.075	1.05785	10.0753	0.61225
10.0835	0.1053	10.0837	0.25825	10.0837	0.37545	10.0835	4.25185	10.0833	1.05605	10.0837	0.6134
10.0918	0.1034	10.092	0.25735	10.092	0.36755	10.0918	4.2433	10.0917	1.0529	10.092	0.61215
10.1002	0.10565	10.1003	0.25825	10.1003	0.35815	10.1002	4.23335	10.1	1.05375	10.1003	0.61195
10.1085	0.10575	10.1087	0.25845	10.1087	0.344	10.1085	4.22215	10.1083	1.054	10.1087	0.61045
10.1168	0.10575	10.117	0.2572	10.117	0.32485	10.1168	4.21295	10.1167	1.052	10.117	0.6074
10.1252	0.10665	10.1253	0.25835	10.1253	0.3071	10.1252	4.2013	10.125	1.05285	10.1253	0.60565
10.1335	0.10895	10.1337	0.2596	10.1337	0.2878	10.1335	4.19085	10.1333	1.0509	10.1337	0.60255
10.1418	0.1085	10.142	0.25835	10.142	0.26835	10.1418	4.17865	10.1417	1.04895	10.142	0.5984
10.1502	0.1068	10.1503	0.2589	10.1503	0.25165	10.1502	4.16555	10.15	1.04805	10.1503	0.5943
10.1585	0.10875	10.1587	0.2582	10.1587	0.2365	10.1585	4.15335	10.1583	1.0492	10.1587	0.5938
10.1668	0.11125	10.167	0.25885	10.167	0.22405	10.1668	4.14215	10.1667	1.0524	10.167	0.5917
10.1752	0.10995	10.1753	0.25775	10.1753	0.2091	10.1752	4.1285	10.175	1.0576	10.1753	0.5888
10.1835	0.11005	10.1837	0.25695	10.1837	0.1979	10.1835	4.1156	10.1833	1.07315	10.1837	0.58665
10.1918	0.11135	10.192	0.25475	10.192	0.19085	10.1918	4.10215	10.1917	1.11285	10.192	0.58545
10.2002	0.11275	10.2003	0.25695	10.2003	0.1841	10.2002	4.0907	10.2	1.20075	10.2003	0.5836
10.2085	0.11175	10.2087	0.2545	10.2087	0.1786	10.2085	4.0742	10.2083	1.38975	10.2087	0.5801
10.2168	0.11105	10.217	0.25445	10.217	0.17355	10.2168	4.0614	10.2167	1.62615	10.217	0.5797
10.2252	0.10915	10.2253	0.2528	10.2253	0.1687	10.2252	4.04775	10.225	1.7631	10.2253	0.57755
10.2335	0.1096	10.2337	0.2523	10.2337	0.16615	10.2335	4.03665	10.2333	1.765	10.2337	0.57625
10.2418	0.1089	10.242	0.2507	10.242	0.16385	10.2418	4.0195	10.2417	1.6942	10.242	0.57395
10.2502	0.10875	10.2503	0.2494	10.2503	0.16025	10.2502	4.00315	10.25	1.62075	10.2503	0.57225
10.2585	0.10895	10.2587	0.2496	10.2587	0.1591	10.2585	3.9897	10.2583	1.563	10.2587	0.57255
10.2668	0.10775	10.267	0.24655	10.267	0.1568	10.2668	3.9729	10.2667	1.4678	10.267	0.57155
10.2752	0.10685	10.2753	0.24435	10.2753	0.15365	10.2752	3.95605	10.275	1.34365	10.2753	0.56925
10.2835	0.10535	10.2837	0.24405	10.2837	0.15285	10.2835	3.9419	10.2833	1.20785	10.2837	0.56825
10.2918	0.1067	10.292	0.2439	10.292	0.1517	10.2918	3.92395	10.2917	1.18135	10.292	0.56935
10.3002	0.10465	10.3003	0.24145	10.3003	0.1481	10.3002	3.90785	10.3	1.51785	10.3003	0.5673
10.3085	0.10455	10.3087	0.23975	10.3087	0.14655	10.3085	3.8921	10.3083	2.22615	10.3087	0.56705
10.3168	0.10445	10.317	0.2371	10.317	0.14585	10.3168	3.876	10.3167	2.9778	10.317	0.56715
10.3252	0.1041	10.3253	0.2372	10.3253	0.14515	10.3252	3.8585	10.325	3.57385	10.3253	0.5668
10.3335	0.10345	10.3337	0.23455	10.3337	0.1456	10.3335	3.8391	10.3333	4.00415	10.3337	0.5669
10.3418	0.1035	10.342	0.23475	10.342	0.1453	10.3418	3.8233	10.3417	4.34185	10.342	0.5687
10.3502	0.10255	10.3503	0.23375	10.3503	0.1438	10.3502	3.8073	10.35	4.61775	10.3503	0.56955
10.3585	0.103	10.3587	0.23265	10.3587	0.14405	10.3585	3.78885	10.3583	4.8294	10.3587	0.57185
10.3668	0.10335	10.367	0.232	10.367	0.1442	10.3668	3.772	10.3667	4.9762	10.367	0.5785
10.3752	0.10285	10.3753	0.2309	10.3753	0.1447	10.3752	3.75335	10.375	5.07415	10.3753	0.5883
10.3835	0.1051	10.3837	0.23065	10.3837	0.14695	10.3835	3.73785	10.3833	5.1376	10.3837	0.6131
10.3918	0.1064	10.392	0.22945	10.392	0.149	10.3918	3.72065	10.3917	5.1819	10.392	0.65775
10.4002	0.1068	10.4003	0.22925	10.4003	0.1526	10.4002	3.7017	10.4	5.2126	10.4003	0.7274
10.4085	0.11045	10.4087	0.22815	10.4087	0.15585	10.4085	3.6868	10.4083	5.23395	10.4087	0.7808
10.4168	0.11775	10.417	0.22605	10.417	0.15895	10.4168	3.6705	10.4167	5.2476	10.417	0.79825
10.4252	0.13315	10.4253	0.22625	10.4253	0.16515	10.4252	3.65315	10.425	5.25765	10.4253	0.7893
10.4335	0.14785	10.4337	0.226	10.4337	0.1745	10.4335	3.6371	10.4333	5.26695	10.4337	0.77145
10.4418	0.1535	10.442	0.2263	10.442	0.185	10.4418	3.62115	10.4417	5.273	10.442	0.7519
10.4502	0.1514	10.4503	0.2248	10.4503	0.199	10.4502	3.60375	10.45	5.2765	10.4503	0.7395
10.4585	0.1425	10.4587	0.22615	10.4587	0.2235	10.4585	3.5901	10.4583	5.2784	10.4587	0.73065
10.4668	0.1313	10.467	0.22455	10.467	0.2614	10.4668	3.5721	10.4667	5.27845	10.467	0.70805
10.4752	0.1234	10.4753	0.2262	10.4753	0.32845	10.4752	3.5581	10.475	5.27655	10.4753	0.6776
10.4835	0.11725	10.4837	0.2268	10.4837	0.41105	10.4835	3.54385	10.4833	5.27475	10.4837	0.64905
10.4918	0.1093	10.492	0.2264	10.492	0.45735	10.4918	3.5303	10.4917	5.27055	10.492	0.65835
10.5002	0.0961	10.5003	0.2255	10.5003	0.4608	10.5002	3.5154	10.5	5.2666	10.5003	0.99115
10.5085	0.0784	10.5087	0.2263	10.5087	0.4409	10.5085	3.50055	10.5083	5.262	10.5087	1.66485
10.5168	0.0376	10.517	0.228	10.517	0.4144	10.5168	3.48785	10.5167	5.2581	10.517	2.347
10.5252	0.1169	10.5253	0.2297	10.5253	0.3929	10.5252	3.4728	10.525	5.253	10.5253	2.89065
10.5335	0.58675	10.5337	0.2322	10.5337	0.37615	10.5335	3.46035	10.5333	5.24875	10.5337	3.3021
10.5418	1.24155	10.542	0.2372	10.542	0.34975	10.5418	3.44595	10.5417	5.24745	10.542	3.6125
10.5502	1.8322	10.5503	0.2466	10.5503	0.30555	10.5502	3.43195	10.55	5.24685	10.5503	3.8656
10.5585	2.298	10.5587	0.25805	10.5587	0.256	10.5585	3.416	10.5583	5.24555	10.5587	4.09095
10.5668	2.64885	10.567	0.2651	10.567	0.2161	10.5668	3.40345	10.5667	5.2453	10.567	4.28425
10.5752	2.91605	10.5753	0.26025	10.5753	0.1777	10.5752	3.3877	10.575	5.24435	10.5753	4.42875
10.5835	3.14315	10.5837	0.25105	10.5837	0.14465	10.5835	3.36895	10.5833	5.2429	10.5837	4.52465
10.5918	3.36335	10.592	0.2383	10.592	0.34065	10.5918	3.35375	10.5917	5.24285	10.592	4.59075
10.6002	3.55965	10.6003	0.2302	10.6003	0.90865	10.6002	3.33425	10.6	5.2416	10.6003	4.6381
10.6085	3.70725	10.6087	0.2211	10.6087	1.56205	10.6085	3.31705	10.6083	5.23825	10.6087	4.66985
10.6168	3.8077	10.617	0.21035	10.617	2.1088	10.6168	3.2985	10.6167	5.23535	10.617	4.6952
10.6252	3.87545	10.6253	0.19965	10.6253	2.51795	10.6252	3.2774	10.625	5.23165	10.6253	4.71375
10.6335	3.92275	10.6337	0.1896	10.6337	2.822	10.6335	3.2565	10.6333	5.22605	10.6337	4.7286
10.6418	3.9578	10.642	0.1825	10.642	3.0676	10.6418	3.23335	10.6417	5.22	10.642	4.7378
10.6502	3.98115	10.6503	0.1766	10.6503	3.29265	10.6502	3.2084	10.65	5.21175	10.6503	4.7424
10.6585	3.9999	10.6587	0.1734	10.6587	3.49125	10.6585	3.18595	10.6583	5.2008	10.6587	4.7448
10.6668	4.01525	10.667	0.17085	10.667	3.63845	10.6668	3.16185	10.6667	5.19205	10.667	4.74375
10.6752	4.02515	10.6753	0.15965	10.6753	3.7373	10.6752	3.13795	10.675	5.1813	10.6753	4.7428
10.6835	4.0335	10.6837	0.1686	10.6837	3.80345	10.6835	3.1091	10.6833	5.1699	10.6837	4.73845
10.6918	4.03875	10.692	0.35085	10.692	3.84485	10.6918	3.0827	10.6917	5.1551	10.692	4.7324
10.7002	4.04515	10.7003	0.8453	10.7003	3.87775	10.7002	3.0545	10.7	5.1448	10.7003	4.7274
10.7085	4.04585	10.7087	1.4539	10.7087	3.89955	10.7085	3.0269	10.7083	5.13095	10.7087	4.7195
10.7168	4.0464	10.717	1.97495	10.717	3.9132	10.7168	2.99675	10.7167	5.11665	10.717	4.71275
10.7252	4.0448	10.7253	2.3605	10.7253	3.92325	10.7252	2.9669	10.725	5.10205	10.7253	4.7071
10.7335	4.045	10.7337	2.64955	10.7337	3.93355	10.7335	2.93695	10.7333	5.0871	10.7337	4.7025
10.7418	4.0421	10.742	2.8975	10.742	3.9379	10.7418	2.90865	10.7417	5.0723	10.742	4.69625
10.7502	4.039	10.7503	3.11385	10.7503	3.93935	10.7502	2.87885	10.75	5.0575	10.7503	4.69425
10.7585	4.03695	10.7587	3.28275	10.7587	3.93935	10.7585	2.84725	10.7583	5.04115	10.7587	4.69055
10.7668	4.03315	10.767	3.3989	10.767	3.936	10.7668	2.81565	10.7667	5.02625	10.767	4.6889
10.7752	4.03145	10.7753	3.47595	10.7753	3.93335	10.7752	2.7856	10.775	5.0108	10.7753	4.6864
10.7835	4.0297	10.7837	3.5273	10.7837	3.93035	10.7835	2.7549	10.7833	4.99485	10.7837	4.68575
10.7918	4.0271	10.792	3.5589	10.792	3.92175	10.7918	2.72405	10.7917	4.9773	10.792	4.68095
10.8002	4.0259	10.8003	3.5827	10.8003	3.91495	10.8002	2.68945	10.8	4.96275	10.8003	4.6789
10.8085	4.025	10.8087	3.6	10.8087	3.9087	10.8085	2.6555	10.8083	4.94915	10.8087	4.67715
10.8168	4.0228	10.817	3.6079	10.817	3.90125	10.8168	2.6236	10.8167	4.9329	10.817	4.6727
10.8252	4.02235	10.8253	3.61435	10.8253	3.8944	10.8252	2.59195	10.825	4.91885	10.8253	4.668
10.8335	4.0178	10.8337	3.6156	10.8337	3.88565	10.8335	2.55905	10.8333	4.90145	10.8337	4.659
10.8418	4.0129	10.842	3.61525	10.842	3.87845	10.8418	2.52765	10.8417	4.8877	10.842	4.6525
10.8502	4.01005	10.8503	3.61585	10.8503	3.8728	10.8502	2.4954	10.85	4.87215	10.8503	4.6449
10.8585	4.0049	10.8587	3.61105	10.8587	3.8661	10.8585	2.4618	10.8583	4.8587	10.8587	4.6372
10.8668	3.9985	10.867	3.60515	10.867	3.858	10.8668	2.43045	10.8667	4.84245	10.867	4.62565
10.8752	3.99275	10.8753	3.59885	10.8753	3.85335	10.8752	2.39675	10.875	4.82895	10.8753	4.6172
10.8835	3.98615	10.8837	3.59155	10.8837	3.8479	10.8835	2.3633	10.8833	4.81345	10.8837	4.6067
10.8918	3.97885	10.892	3.58265	10.892	3.8407	10.8918	2.3313	10.8917	4.79935	10.892	4.5968
10.9002	3.96915	10.9003	3.5748	10.9003	3.83615	10.9002	2.2968	10.9	4.7856	10.9003	4.58645
10.9085	3.9602	10.9087	3.56515	10.9087	3.8283	10.9085	2.2648	10.9083	4.76955	10.9087	4.5738
10.9168	3.9523	10.917	3.55715	10.917	3.82225	10.9168	2.2325	10.9167	4.7564	10.917	4.563
10.9252	3.94195	10.9253	3.5493	10.9253	3.81355	10.9252	2.1986	10.925	4.74295	10.9253	4.55155
10.9335	3.9315	10.9337	3.54115	10.9337	3.80525	10.9335	2.16765	10.9333	4.72885	10.9337	4.53975
10.9418	3.91915	10.942	3.53405	10.942	3.7966	10.9418	2.1353	10.9417	4.71175	10.942	4.527
10.9502	3.91055	10.9503	3.53085	10.9503	3.79015	10.9502	2.1001	10.95	4.69855	10.9503	4.5156
10.9585	3.89835	10.9587	3.52365	10.9587	3.77755	10.9585	2.06605	10.9583	4.68175	10.9587	4.5013
10.9668	3.88585	10.967	3.5192	10.967	3.767	10.9668	2.03125	10.9667	4.66765	10.967	4.48965
10.9752	3.8741	10.9753	3.51405	10.9753	3.75775	10.9752	1.99785	10.975	4.65015	10.9753	4.4762
10.9835	3.86305	10.9837	3.5098	10.9837	3.74825	10.9835	1.96465	10.9833	4.6352	10.9837	4.46435
10.9918	3.8513	10.992	3.5041	10.992	3.7378	10.9918	1.9288	10.9917	4.6179	10.992	4.4505
11.0002	3.8389	11.0003	3.50005	11.0003	3.72805	11.0002	1.8952	11	4.60155	11.0003	4.43895
11.0085	3.82915	11.0087	3.4942	11.0087	3.7185	11.0085	1.8607	11.0083	4.5865	11.0087	4.42755
11.0168	3.8175	11.017	3.4903	11.017	3.7061	11.0168	1.84035	11.0167	4.57155	11.017	4.41555
11.0252	3.8065	11.0253	3.48325	11.0253	3.6949	11.0252	1.808	11.025	4.5546	11.0253	4.4026
11.0335	3.7955	11.0337	3.47835	11.0337	3.6843	11.0335	1.7301	11.0333	4.5376	11.0337	4.3906
11.0418	3.7844	11.042	3.4696	11.042	3.67295	11.0418	1.72555	11.0417	4.5213	11.042	4.38055
11.0502	3.77265	11.0503	3.4639	11.0503	3.6602	11.0502	1.7018	11.05	4.50385	11.0503	4.3667
11.0585	3.76355	11.0587	3.45565	11.0587	3.649	11.0585	1.6627	11.0583	4.48735	11.0587	4.3561
11.0668	3.7518	11.067	3.4462	11.067	3.6359	11.0668	1.62735	11.0667	4.46795	11.067	4.34255
11.0752	3.74035	11.0753	3.43655	11.0753	3.62575	11.0752	1.5901	11.075	4.451	11.0753	4.3299
11.0835	3.73115	11.0837	3.42785	11.0837	3.61345	11.0835	1.5559	11.0833	4.4343	11.0837	4.31745
11.0918	3.7196	11.092	3.41795	11.092	3.60085	11.0918	1.5196	11.0917	4.417	11.092	4.30765
11.1002	3.7091	11.1003	3.4068	11.1003	3.58735	11.1002	1.4846	11.1	4.39675	11.1003	4.29565
11.1085	3.70005	11.1087	3.3957	11.1087	3.57585	11.1085	1.4473	11.1083	4.38065	11.1087	4.2838
11.1168	3.6887	11.117	3.3852	11.117	3.56295	11.1168	1.4107	11.1167	4.3637	11.117	4.2719
11.1252	3.6755	11.1253	3.37235	11.1253	3.54975	11.1252	1.37215	11.125	4.34475	11.1253	4.2597
11.1335	3.6655	11.1337	3.3604	11.1337	3.5372	11.1335	1.33145	11.1333	4.3269	11.1337	4.24725
11.1418	3.6567	11.142	3.3501	11.142	3.52515	11.1418	1.2908	11.1417	4.3089	11.142	4.23705
11.1502	3.6448	11.1503	3.3343	11.1503	3.5097	11.1502	1.2501	11.15	4.2901	11.1503	4.2223
11.1585	3.63045	11.1587	3.3206	11.1587	3.49445	11.1585	1.208	11.1583	4.2692	11.1587	4.20715
11.1668	3.61805	11.167	3.30455	11.167	3.47895	11.1668	1.16655	11.1667	4.24915	11.167	4.1925
11.1752	3.6062	11.1753	3.29085	11.1753	3.46555	11.1752	1.12315	11.175	4.23035	11.1753	4.179
11.1835	3.59445	11.1837	3.2772	11.1837	3.4514	11.1835	1.0819	11.1833	4.21125	11.1837	4.16545
11.1918	3.5833	11.192	3.26265	11.192	3.4372	11.1918	1.04415	11.1917	4.1926	11.192	4.1534
11.2002	3.57	11.2003	3.24645	11.2003	3.42305	11.2002	1.0071	11.2	4.1714	11.2003	4.13695
11.2085	3.55825	11.2087	3.2309	11.2087	3.4088	11.2085	0.96855	11.2083	4.1524	11.2087	4.124
11.2168	3.5433	11.217	3.2118	11.217	3.3918	11.2168	0.93455	11.2167	4.13165	11.217	4.1081
11.2252	3.5324	11.2253	3.1973	11.2253	3.3788	11.2252	0.90255	11.225	4.1122	11.2253	4.0938
11.2335	3.51875	11.2337	3.1809	11.2337	3.36405	11.2335	0.87265	11.2333	4.0911	11.2337	4.0791
11.2418	3.50465	11.242	3.1635	11.242	3.34905	11.2418	0.8429	11.2417	4.0718	11.242	4.06385
11.2502	3.4905	11.2503	3.14595	11.2503	3.33485	11.2502	0.8144	11.25	4.0513	11.2503	4.04915
11.2585	3.47915	11.2587	3.12765	11.2587	3.3191	11.2585	0.78875	11.2583	4.03025	11.2587	4.0342
11.2668	3.4635	11.267	3.10755	11.267	3.30295	11.2668	0.76395	11.2667	4.0064	11.267	4.01685
11.2752	3.4476	11.2753	3.0882	11.2753	3.28645	11.2752	0.7404	11.275	3.98565	11.2753	4.0009
11.2835	3.4333	11.2837	3.0696	11.2837	3.2697	11.2835	0.7171	11.2833	3.96405	11.2837	3.9856
11.2918	3.417	11.292	3.04695	11.292	3.25245	11.2918	0.69685	11.2917	3.9409	11.292	3.9658
11.3002	3.405	11.3003	3.0293	11.3003	3.2383	11.3002	0.67635	11.3	3.92075	11.3003	3.9525
11.3085	3.3899	11.3087	3.0094	11.3087	3.22375	11.3085	0.6554	11.3083	3.89775	11.3087	3.9363
11.3168	3.374	11.317	2.98725	11.317	3.20595	11.3168	0.6339	11.3167	3.87355	11.317	3.92005
11.3252	3.36005	11.3253	2.96695	11.3253	3.19015	11.3252	0.616	11.325	3.8504	11.3253	3.90335
11.3335	3.3425	11.3337	2.94475	11.3337	3.17075	11.3335	0.59675	11.3333	3.8257	11.3337	3.88495
11.3418	3.32655	11.342	2.92325	11.342	3.15215	11.3418	0.57665	11.3417	3.8021	11.342	3.86705
11.3502	3.31145	11.3503	2.901	11.3503	3.13435	11.3502	0.55665	11.35	3.77585	11.3503	3.85035
11.3585	3.29435	11.3587	2.8776	11.3587	3.11465	11.3585	0.5422	11.3583	3.7499	11.3587	3.83245
11.3668	3.27975	11.367	2.85565	11.367	3.09535	11.3668	0.5227	11.3667	3.7269	11.367	3.81675
11.3752	3.26355	11.3753	2.8352	11.3753	3.07615	11.3752	0.50615	11.375	3.70085	11.3753	3.7999
11.3835	3.2487	11.3837	2.81155	11.3837	3.05595	11.3835	0.48985	11.3833	3.67445	11.3837	3.78125
11.3918	3.23325	11.392	2.7891	11.392	3.03835	11.3918	0.4746	11.3917	3.64855	11.392	3.7642
11.4002	3.2179	11.4003	2.76595	11.4003	3.01635	11.4002	0.4569	11.4	3.6214	11.4003	3.74425
11.4085	3.2023	11.4087	2.74335	11.4087	2.9954	11.4085	0.44225	11.4083	3.59475	11.4087	3.72635
11.4168	3.18625	11.417	2.71995	11.417	2.9755	11.4168	0.4261	11.4167	3.56965	11.417	3.7074
11.4252	3.1706	11.4253	2.69715	11.4253	2.95265	11.4252	0.4142	11.425	3.5423	11.4253	3.68815
11.4335	3.15455	11.4337	2.67315	11.4337	2.92995	11.4335	0.3998	11.4333	3.5127	11.4337	3.668
11.4418	3.13885	11.442	2.65065	11.442	2.9078	11.4418	0.388	11.4417	3.4863	11.442	3.65085
11.4502	3.12165	11.4503	2.6259	11.4503	2.8831	11.4502	0.3774	11.45	3.4571	11.4503	3.6287
11.4585	3.1033	11.4587	2.60275	11.4587	2.8588	11.4585	0.36495	11.4583	3.4281	11.4587	3.6072
11.4668	3.0841	11.467	2.57995	11.467	2.8328	11.4668	0.35215	11.4667	3.4006	11.467	3.58435
11.4752	3.0672	11.4753	2.55675	11.4753	2.80905	11.4752	0.3419	11.475	3.37215	11.4753	3.56215
11.4835	3.0488	11.4837	2.53475	11.4837	2.7839	11.4835	0.3311	11.4833	3.34295	11.4837	3.5382
11.4918	3.02845	11.492	2.51065	11.492	2.7591	11.4918	0.32225	11.4917	3.3137	11.492	3.5135
11.5002	3.00755	11.5003	2.48825	11.5003	2.72965	11.5002	0.31625	11.5	3.28495	11.5003	3.4866
11.5085	2.9862	11.5087	2.46505	11.5087	2.70465	11.5085	0.30865	11.5083	3.25655	11.5087	3.4595
11.5168	2.96145	11.517	2.44325	11.517	2.67575	11.5168	0.30065	11.5167	3.2277	11.517	3.4302
11.5252	2.938	11.5253	2.41955	11.5253	2.6488	11.5252	0.2962	11.525	3.19755	11.5253	3.40345
11.5335	2.9134	11.5337	2.39655	11.5337	2.6202	11.5335	0.28845	11.5333	3.16845	11.5337	3.37595
11.5418	2.8886	11.542	2.3703	11.542	2.5922	11.5418	0.2813	11.5417	3.13875	11.542	3.3454
11.5502	2.8616	11.5503	2.3446	11.5503	2.56155	11.5502	0.27615	11.55	3.1082	11.5503	3.3156
11.5585	2.8361	11.5587	2.3196	11.5587	2.53445	11.5585	0.2688	11.5583	3.08065	11.5587	3.2867
11.5668	2.8071	11.567	2.2913	11.567	2.50525	11.5668	0.26295	11.5667	3.0494	11.567	3.25505
11.5752	2.77795	11.5753	2.2629	11.5753	2.4768	11.5752	0.2586	11.575	3.01745	11.5753	3.22395
11.5835	2.74995	11.5837	2.2334	11.5837	2.4488	11.5835	0.2542	11.5833	2.9873	11.5837	3.19045
11.5918	2.7182	11.592	2.2032	11.592	2.4159	11.5918	0.2511	11.5917	2.95475	11.592	3.15815
11.6002	2.68915	11.6003	2.17135	11.6003	2.38715	11.6002	0.2454	11.6	2.92335	11.6003	3.12695
11.6085	2.66005	11.6087	2.1385	11.6087	2.3586	11.6085	0.2413	11.6083	2.8891	11.6087	3.09435
11.6168	2.6298	11.617	2.1031	11.617	2.32585	11.6168	0.23875	11.6167	2.85685	11.617	3.0625
11.6252	2.5989	11.6253	2.0717	11.6253	2.29665	11.6252	0.23375	11.625	2.82205	11.6253	3.0311
11.6335	2.56935	11.6337	2.036	11.6337	2.2667	11.6335	0.22985	11.6333	2.7876	11.6337	2.9997
11.6418	2.5382	11.642	1.9983	11.642	2.2338	11.6418	0.22755	11.6417	2.7509	11.642	2.96555
11.6502	2.50435	11.6503	1.96035	11.6503	2.2002	11.6502	0.2229	11.65	2.7118	11.6503	2.93125
11.6585	2.47325	11.6587	1.92205	11.6587	2.16705	11.6585	0.2227	11.6583	2.67625	11.6587	2.8991
11.6668	2.4424	11.667	1.8851	11.667	2.1351	11.6668	0.22265	11.6667	2.6394	11.667	2.8674
11.6752	2.40965	11.6753	1.84675	11.6753	2.1007	11.6752	0.22005	11.675	2.6007	11.6753	2.8326
11.6835	2.3774	11.6837	1.80825	11.6837	2.066	11.6835	0.21775	11.6833	2.56095	11.6837	2.7995
11.6918	2.34415	11.692	1.76915	11.692	2.03245	11.6918	0.2161	11.6917	2.5227	11.692	2.76655
11.7002	2.314	11.7003	1.7307	11.7003	1.9988	11.7002	0.2216	11.7	2.4845	11.7003	2.7337
11.7085	2.2807	11.7087	1.69225	11.7087	1.963	11.7085	0.23335	11.7083	2.4459	11.7087	2.6999
11.7168	2.24735	11.717	1.6517	11.717	1.92475	11.7168	0.2443	11.7167	2.4061	11.717	2.6656
11.7252	2.21605	11.7253	1.614	11.7253	1.8894	11.7252	0.2067	11.725	2.3673	11.7253	2.63235
11.7335	2.1826	11.7337	1.57495	11.7337	1.85305	11.7335	0.21375	11.7333	2.32805	11.7337	2.59805
11.7418	2.14905	11.742	1.5365	11.742	1.81495	11.7418	0.2087	11.7417	2.28775	11.742	2.5623
11.7502	2.1174	11.7503	1.49895	11.7503	1.77835	11.7502	0.2029	11.75	2.25025	11.7503	2.52855
11.7585	2.0846	11.7587	1.4593	11.7587	1.74325	11.7585	0.2016	11.7583	2.2104	11.7587	2.495
11.7668	2.05065	11.767	1.42065	11.767	1.70595	11.7668	0.19775	11.7667	2.17325	11.767	2.4601
11.7752	2.0172	11.7753	1.384	11.7753	1.6674	11.7752	0.197	11.775	2.13325	11.7753	2.42475
11.7835	1.98385	11.7837	1.3454	11.7837	1.6308	11.7835	0.19495	11.7833	2.0933	11.7837	2.39055
11.7918	1.95225	11.792	1.30915	11.792	1.594	11.7918	0.1939	11.7917	2.0569	11.792	2.3558
11.8002	1.91845	11.8003	1.27345	11.8003	1.5569	11.8002	0.19205	11.8	2.01845	11.8003	2.321
11.8085	1.88605	11.8087	1.2368	11.8087	1.52105	11.8085	0.19125	11.8083	1.9824	11.8087	2.2857
11.8168	1.8509	11.817	1.20105	11.817	1.48405	11.8168	0.19045	11.8167	1.9455	11.817	2.25115
11.8252	1.82	11.8253	1.16715	11.8253	1.44865	11.8252	0.1866	11.825	1.90905	11.8253	2.21985
11.8335	1.78485	11.8337	1.1309	11.8337	1.4128	11.8335	0.1861	11.8333	1.8716	11.8337	2.18195
11.8418	1.75225	11.842	1.09715	11.842	1.377	11.8418	0.182	11.8417	1.8356	11.842	2.1491
11.8502	1.7199	11.8503	1.0654	11.8503	1.34135	11.8502	0.18245	11.85	1.80045	11.8503	2.11485
11.8585	1.6861	11.8587	1.03095	11.8587	1.30655	11.8585	0.1799	11.8583	1.76585	11.8587	2.0797
11.8668	1.6523	11.867	0.99615	11.867	1.27225	11.8668	0.17995	11.8667	1.73025	11.867	2.04355
11.8752	1.6193	11.8753	0.96295	11.8753	1.23605	11.8752	0.17845	11.875	1.6945	11.8753	2.00745
11.8835	1.58495	11.8837	0.93245	11.8837	1.20085	11.8835	0.178	11.8833	1.6609	11.8837	1.97305
11.8918	1.55035	11.892	0.9013	11.892	1.16745	11.8918	0.17465	11.8917	1.62645	11.892	1.9364
11.9002	1.5152	11.9003	0.8712	11.9003	1.13265	11.9002	0.1763	11.9	1.59375	11.9003	1.9029
11.9085	1.48125	11.9087	0.8426	11.9087	1.0999	11.9085	0.1729	11.9083	1.56045	11.9087	1.86785
11.9168	1.44855	11.917	0.81405	11.917	1.0663	11.9168	0.17325	11.9167	1.53025	11.917	1.8328
11.9252	1.4154	11.9253	0.78605	11.9253	1.0346	11.9252	0.17005	11.925	1.49815	11.9253	1.797
11.9335	1.38235	11.9337	0.76185	11.9337	1.0039	11.9335	0.16835	11.9333	1.4697	11.9337	1.76445
11.9418	1.3488	11.942	0.7352	11.942	0.9702	11.9418	0.1651	11.9417	1.4384	11.942	1.7291
11.9502	1.3144	11.9503	0.70885	11.9503	0.9396	11.9502	0.16365	11.95	1.40745	11.9503	1.6941
11.9585	1.2838	11.9587	0.6858	11.9587	0.9117	11.9585	0.1654	11.9583	1.38175	11.9587	1.66105
11.9668	1.2485	11.967	0.6607	11.967	0.8805	11.9668	0.16265	11.9667	1.3521	11.967	1.6249
11.9752	1.2176	11.9753	0.6417	11.9753	0.85495	11.9752	0.1623	11.975	1.3267	11.9753	1.59355
11.9835	1.18585	11.9837	0.6205	11.9837	0.8265	11.9835	0.1613	11.9833	1.298	11.9837	1.55835
11.9918	1.1547	11.992	0.6017	11.992	0.799	11.9918	0.1596	11.9917	1.2743	11.992	1.52675
12.0002	1.1227	12.0003	0.5814	12.0003	0.773	12.0002	0.15755	12	1.2502	12.0003	1.4956
12.0085	1.0901	12.0087	0.5637	12.0087	0.7461	12.0085	0.1556	12.0083	1.22465	12.0087	1.4633
12.0168	1.05925	12.017	0.5465	12.017	0.72235	12.0168	0.15575	12.0167	1.2034	12.017	1.4316
12.0252	1.0285	12.0253	0.53075	12.0253	0.69855	12.0252	0.15235	12.025	1.18075	12.0253	1.40075
12.0335	0.998	12.0337	0.51405	12.0337	0.6728	12.0335	0.15075	12.0333	1.1585	12.0337	1.3697
12.0418	0.9685	12.042	0.4999	12.042	0.6514	12.0418	0.1514	12.0417	1.1375	12.042	1.34055
12.0502	0.93905	12.0503	0.4851	12.0503	0.6297	12.0502	0.1515	12.05	1.11765	12.0503	1.3105
12.0585	0.9109	12.0587	0.473	12.0587	0.60895	12.0585	0.1497	12.0583	1.09745	12.0587	1.28345
12.0668	0.88235	12.067	0.45985	12.067	0.5889	12.0668	0.15005	12.0667	1.0799	12.067	1.25575
12.0752	0.8533	12.0753	0.44555	12.0753	0.5686	12.0752	0.14975	12.075	1.05965	12.0753	1.22645
12.0835	0.8277	12.0837	0.4365	12.0837	0.55135	12.0835	0.14965	12.0833	1.0434	12.0837	1.20145
12.0918	0.8022	12.092	0.42655	12.092	0.5317	12.0918	0.1491	12.0917	1.0266	12.092	1.1749
12.1002	0.77745	12.1003	0.4158	12.1003	0.5152	12.1002	0.14815	12.1	1.01045	12.1003	1.1511
12.1085	0.75005	12.1087	0.4047	12.1087	0.49525	12.1085	0.1487	12.1083	0.99485	12.1087	1.127
12.1168	0.72565	12.117	0.3963	12.117	0.4792	12.1168	0.1472	12.1167	0.9808	12.117	1.10265
12.1252	0.70205	12.1253	0.38825	12.1253	0.4637	12.1252	0.1472	12.125	0.9659	12.1253	1.07995
12.1335	0.6795	12.1337	0.37865	12.1337	0.44885	12.1335	0.14565	12.1333	0.95095	12.1337	1.0583
12.1418	0.6576	12.142	0.3722	12.142	0.4354	12.1418	0.14485	12.1417	0.9398	12.142	1.0369
12.1502	0.6363	12.1503	0.36545	12.1503	0.42115	12.1502	0.14685	12.15	0.92715	12.1503	1.0162
12.1585	0.61475	12.1587	0.35715	12.1587	0.408	12.1585	0.14525	12.1583	0.9137	12.1587	0.9968
12.1668	0.5955	12.167	0.34975	12.167	0.3959	12.1668	0.14305	12.1667	0.9022	12.167	0.97865
12.1752	0.5773	12.1753	0.34535	12.1753	0.38475	12.1752	0.14265	12.175	0.89255	12.1753	0.96115
12.1835	0.5579	12.1837	0.33855	12.1837	0.3716	12.1835	0.14255	12.1833	0.87905	12.1837	0.9422
12.1918	0.54175	12.192	0.3337	12.192	0.3632	12.1918	0.142	12.1917	0.8694	12.192	0.92675
12.2002	0.525	12.2003	0.3288	12.2003	0.35345	12.2002	0.14225	12.2	0.8591	12.2003	0.91135
12.2085	0.50975	12.2087	0.32365	12.2087	0.3426	12.2085	0.1423	12.2083	0.85	12.2087	0.8966
12.2168	0.4918	12.217	0.3173	12.217	0.33185	12.2168	0.1435	12.2167	0.8403	12.217	0.88195
12.2252	0.47745	12.2253	0.3132	12.2253	0.3236	12.2252	0.14065	12.225	0.83125	12.2253	0.86825
12.2335	0.46385	12.2337	0.3096	12.2337	0.3144	12.2335	0.14015	12.2333	0.8228	12.2337	0.85485
12.2418	0.4495	12.242	0.3038	12.242	0.30555	12.2418	0.141	12.2417	0.8139	12.242	0.8416
12.2502	0.43675	12.2503	0.29965	12.2503	0.29735	12.2502	0.13885	12.25	0.80535	12.2503	0.8303
12.2585	0.42525	12.2587	0.2971	12.2587	0.29115	12.2585	0.14135	12.2583	0.79685	12.2587	0.8198
12.2668	0.4118	12.267	0.29375	12.267	0.2845	12.2668	0.142	12.2667	0.79105	12.267	0.80905
12.2752	0.40195	12.2753	0.28855	12.2753	0.2766	12.2752	0.1399	12.275	0.7832	12.2753	0.7963
12.2835	0.3905	12.2837	0.2841	12.2837	0.26985	12.2835	0.1409	12.2833	0.77505	12.2837	0.7856
12.2918	0.37885	12.292	0.28025	12.292	0.26225	12.2918	0.14155	12.2917	0.7668	12.292	0.77625
12.3002	0.3696	12.3003	0.27765	12.3003	0.2585	12.3002	0.14085	12.3	0.7613	12.3003	0.76755
12.3085	0.36155	12.3087	0.27605	12.3087	0.2522	12.3085	0.1396	12.3083	0.7563	12.3087	0.7586
12.3168	0.3509	12.317	0.27205	12.317	0.24635	12.3168	0.14275	12.3167	0.7489	12.317	0.74975
12.3252	0.34275	12.3253	0.2712	12.3253	0.2422	12.3252	0.14145	12.325	0.74395	12.3253	0.74255
12.3335	0.33335	12.3337	0.2654	12.3337	0.2365	12.3335	0.14205	12.3333	0.7363	12.3337	0.73215
12.3418	0.32595	12.342	0.2627	12.342	0.23175	12.3418	0.14225	12.3417	0.7319	12.342	0.72505
12.3502	0.3182	12.3503	0.26065	12.3503	0.22695	12.3502	0.1416	12.35	0.7247	12.3503	0.71705
12.3585	0.31165	12.3587	0.25875	12.3587	0.22405	12.3585	0.1425	12.3583	0.72165	12.3587	0.71085
12.3668	0.3036	12.367	0.25665	12.367	0.2189	12.3668	0.14435	12.3667	0.716	12.367	0.70215
12.3752	0.2968	12.3753	0.25475	12.3753	0.2162	12.3752	0.14215	12.375	0.7098	12.3753	0.6954
12.3835	0.29155	12.3837	0.25155	12.3837	0.2125	12.3835	0.14345	12.3833	0.70625	12.3837	0.6898
12.3918	0.2851	12.392	0.2494	12.392	0.20765	12.3918	0.1447	12.3917	0.7007	12.392	0.6811
12.4002	0.27795	12.4003	0.24655	12.4003	0.20425	12.4002	0.14225	12.4	0.69665	12.4003	0.675
12.4085	0.27405	12.4087	0.24615	12.4087	0.2028	12.4085	0.145	12.4083	0.6938	12.4087	0.6696
12.4168	0.26845	12.417	0.2448	12.417	0.20075	12.4168	0.1483	12.4167	0.6899	12.417	0.66295
12.4252	0.26465	12.4253	0.2432	12.4253	0.1965	12.4252	0.14885	12.425	0.6852	12.4253	0.6569
12.4335	0.25925	12.4337	0.24055	12.4337	0.19435	12.4335	0.1515	12.4333	0.6806	12.4337	0.64955
12.4418	0.25455	12.442	0.2403	12.442	0.1908	12.4418	0.1509	12.4417	0.67835	12.442	0.6432
12.4502	0.25125	12.4503	0.2371	12.4503	0.1891	12.4502	0.1525	12.45	0.67385	12.4503	0.63775
12.4585	0.245	12.4587	0.23435	12.4587	0.1848	12.4585	0.15015	12.4583	0.67045	12.4587	0.6306
12.4668	0.2432	12.467	0.23355	12.467	0.1851	12.4668	0.1531	12.4667	0.66745	12.467	0.62585
12.4752	0.238	12.4753	0.2321	12.4753	0.18225	12.4752	0.1531	12.475	0.66345	12.4753	0.61985
12.4835	0.2316	12.4837	0.2298	12.4837	0.1786	12.4835	0.15735	12.4833	0.6591	12.4837	0.61365
12.4918	0.2298	12.492	0.2272	12.492	0.17725	12.4918	0.1554	12.4917	0.65615	12.492	0.60655
12.5002	0.22755	12.5003	0.2271	12.5003	0.17535	12.5002	0.1552	12.5	0.65485	12.5003	0.6034
12.5085	0.2245	12.5087	0.2269	12.5087	0.17415	12.5085	0.15635	12.5083	0.65115	12.5087	0.59915
12.5168	0.2203	12.517	0.2227	12.517	0.1715	12.5168	0.1588	12.5167	0.64655	12.517	0.5912
12.5252	0.21685	12.5253	0.22275	12.5253	0.16865	12.5252	0.1588	12.525	0.64455	12.5253	0.5866
12.5335	0.21435	12.5337	0.22055	12.5337	0.1673	12.5335	0.1607	12.5333	0.64085	12.5337	0.58025
12.5418	0.2113	12.542	0.22035	12.542	0.16345	12.5418	0.162	12.5417	0.6376	12.542	0.575
12.5502	0.2096	12.5503	0.21845	12.5503	0.16305	12.5502	0.1634	12.55	0.6363	12.5503	0.56925
12.5585	0.20705	12.5587	0.21695	12.5587	0.16175	12.5585	0.1641	12.5583	0.6343	12.5587	0.566
12.5668	0.20495	12.567	0.2167	12.567	0.16105	12.5668	0.1658	12.5667	0.6321	12.567	0.56165
12.5752	0.2028	12.5753	0.2152	12.5753	0.16035	12.5752	0.16635	12.575	0.6286	12.5753	0.5579
12.5835	0.19935	12.5837	0.2133	12.5837	0.15795	12.5835	0.17015	12.5833	0.62545	12.5837	0.5528
12.5918	0.1987	12.592	0.212	12.592	0.15615	12.5918	0.17175	12.5917	0.62385	12.592	0.5489
12.6002	0.19465	12.6003	0.21025	12.6003	0.1534	12.6002	0.17245	12.6	0.62015	12.6003	0.5437
12.6085	0.193	12.6087	0.2096	12.6087	0.1519	12.6085	0.17675	12.6083	0.6181	12.6087	0.5398
12.6168	0.19215	12.617	0.2092	12.617	0.151	12.6168	0.1787	12.6167	0.61685	12.617	0.5361
12.6252	0.1898	12.6253	0.2065	12.6253	0.1492	12.6252	0.18155	12.625	0.6138	12.6253	0.531
12.6335	0.1886	12.6337	0.20515	12.6337	0.1487	12.6335	0.18525	12.6333	0.61255	12.6337	0.52805
12.6418	0.1875	12.642	0.20655	12.642	0.1477	12.6418	0.1906	12.6417	0.6098	12.642	0.5248
12.6502	0.18505	12.6503	0.2059	12.6503	0.14385	12.6502	0.1943	12.65	0.6068	12.6503	0.5186
12.6585	0.1832	12.6587	0.20595	12.6587	0.14485	12.6585	0.19905	12.6583	0.6054	12.6587	0.5164
12.6668	0.18165	12.667	0.2049	12.667	0.1432	12.6668	0.2056	12.6667	0.6034	12.667	0.5133
12.6752	0.1804	12.6753	0.20575	12.6753	0.14385	12.6752	0.21215	12.675	0.6031	12.6753	0.5106
12.6835	0.1783	12.6837	0.20415	12.6837	0.1421	12.6835	0.21815	12.6833	0.601	12.6837	0.50715
12.6918	0.17765	12.692	0.2032	12.692	0.1427	12.6918	0.2252	12.6917	0.59915	12.692	0.504
12.7002	0.1763	12.7003	0.20145	12.7003	0.1408	12.7002	0.23365	12.7	0.5973	12.7003	0.50185
12.7085	0.1754	12.7087	0.20105	12.7087	0.14	12.7085	0.2439	12.7083	0.5954	12.7087	0.4998
12.7168	0.17415	12.717	0.1998	12.717	0.1397	12.7168	0.25075	12.7167	0.5937	12.717	0.4967
12.7252	0.1732	12.7253	0.19995	12.7253	0.13915	12.7252	0.26005	12.725	0.59345	12.7253	0.49395
12.7335	0.1724	12.7337	0.19945	12.7337	0.13875	12.7335	0.2701	12.7333	0.5918	12.7337	0.49155
12.7418	0.16905	12.742	0.19715	12.742	0.1371	12.7418	0.27985	12.7417	0.58935	12.742	0.48895
12.7502	0.16845	12.7503	0.1971	12.7503	0.13605	12.7502	0.28775	12.75	0.5886	12.7503	0.4864
12.7585	0.1678	12.7587	0.1978	12.7587	0.1365	12.7585	0.29845	12.7583	0.587	12.7587	0.48535
12.7668	0.16845	12.767	0.19735	12.767	0.13545	12.7668	0.3054	12.7667	0.58575	12.767	0.4837
12.7752	0.1667	12.7753	0.1982	12.7753	0.1372	12.7752	0.313	12.775	0.58565	12.7753	0.4823
12.7835	0.1633	12.7837	0.197	12.7837	0.13405	12.7835	0.32245	12.7833	0.5829	12.7837	0.4799
12.7918	0.1637	12.792	0.19615	12.792	0.13385	12.7918	0.33095	12.7917	0.5822	12.792	0.4777
12.8002	0.16365	12.8003	0.1968	12.8003	0.1334	12.8002	0.33845	12.8	0.58055	12.8003	0.47655
12.8085	0.16255	12.8087	0.1949	12.8087	0.1342	12.8085	0.34395	12.8083	0.57925	12.8087	0.47545
12.8168	0.1644	12.817	0.19525	12.817	0.13405	12.8168	0.3517	12.8167	0.57875	12.817	0.4736
12.8252	0.1633	12.8253	0.19425	12.8253	0.13435	12.8252	0.36005	12.825	0.5774	12.8253	0.4715
12.8335	0.1633	12.8337	0.1955	12.8337	0.13385	12.8335	0.36605	12.8333	0.5778	12.8337	0.47085
12.8418	0.1601	12.842	0.1921	12.842	0.1332	12.8418	0.3682	12.8417	0.5741	12.842	0.4667
12.8502	0.1604	12.8503	0.19125	12.8503	0.13245	12.8502	0.3747	12.85	0.57345	12.8503	0.466
12.8585	0.1583	12.8587	0.19035	12.8587	0.13275	12.8585	0.38095	12.8583	0.5726	12.8587	0.4651
12.8668	0.15995	12.867	0.19245	12.867	0.13295	12.8668	0.38335	12.8667	0.57255	12.867	0.4638
12.8752	0.15915	12.8753	0.19225	12.8753	0.1326	12.8752	0.38775	12.875	0.57135	12.8753	0.463
12.8835	0.1573	12.8837	0.1903	12.8837	0.13255	12.8835	0.39135	12.8833	0.56895	12.8837	0.46095
12.8918	0.15565	12.892	0.18865	12.892	0.13175	12.8918	0.3954	12.8917	0.567	12.892	0.4585
12.9002	0.1553	12.9003	0.1869	12.9003	0.1321	12.9002	0.39705	12.9	0.56725	12.9003	0.4568
12.9085	0.1565	12.9087	0.18665	12.9087	0.1325	12.9085	0.40295	12.9083	0.56615	12.9087	0.4567
12.9168	0.15725	12.917	0.18715	12.917	0.13185	12.9168	0.40435	12.9167	0.56565	12.917	0.4554
12.9252	0.15485	12.9253	0.18715	12.9253	0.13325	12.9252	0.40815	12.925	0.56545	12.9253	0.4534
12.9335	0.1548	12.9337	0.18815	12.9337	0.133	12.9335	0.413	12.9333	0.56555	12.9337	0.4537
12.9418	0.15455	12.942	0.18605	12.942	0.1327	12.9418	0.413	12.9417	0.56525	12.942	0.4535
12.9502	0.1532	12.9503	0.18455	12.9503	0.13135	12.9502	0.41385	12.95	0.5648	12.9503	0.45025
12.9585	0.15295	12.9587	0.18475	12.9587	0.1322	12.9585	0.41855	12.9583	0.56525	12.9587	0.4496
12.9668	0.15085	12.967	0.18395	12.967	0.13175	12.9668	0.4175	12.9667	0.56415	12.967	0.44825
12.9752	0.1522	12.9753	0.1836	12.9753	0.13185	12.9752	0.4195	12.975	0.5663	12.9753	0.4485
12.9835	0.1516	12.9837	0.18495	12.9837	0.1319	12.9835	0.4221	12.9833	0.56785	12.9837	0.4468
12.9918	0.15305	12.992	0.1846	12.992	0.1329	12.9918	0.4265	12.9917	0.56945	12.992	0.44635
13.0002	0.15055	13.0003	0.18245	13.0003	0.13145	13.0002	0.42785	13	0.57	13.0003	0.4435
13.0085	0.15125	13.0087	0.1853	13.0087	0.1332	13.0085	0.42655	13.0083	0.57115	13.0087	0.4452
13.0168	0.1487	13.017	0.1846	13.017	0.13175	13.0168	0.4284	13.0167	0.5729	13.017	0.44235
13.0252	0.15065	13.0253	0.1856	13.0253	0.13235	13.0252	0.4307	13.025	0.57535	13.0253	0.4414
13.0335	0.15135	13.0337	0.1866	13.0337	0.13495	13.0335	0.4296	13.0333	0.5792	13.0337	0.442
13.0418	0.1494	13.042	0.18695	13.042	0.1331	13.0418	0.4298	13.0417	0.57925	13.042	0.4399
13.0502	0.1483	13.0503	0.1874	13.0503	0.13485	13.0502	0.43155	13.05	0.5809	13.0503	0.4385
13.0585	0.14825	13.0587	0.1896	13.0587	0.13565	13.0585	0.42805	13.0583	0.5846	13.0587	0.4391
13.0668	0.14675	13.067	0.19005	13.067	0.1343	13.0668	0.42845	13.0667	0.5845	13.067	0.437
13.0752	0.1482	13.0753	0.1916	13.0753	0.1363	13.0752	0.42615	13.075	0.58685	13.0753	0.4363
13.0835	0.14825	13.0837	0.1954	13.0837	0.13885	13.0835	0.4241	13.0833	0.58825	13.0837	0.4359
13.0918	0.1474	13.092	0.19735	13.092	0.13855	13.0918	0.42085	13.0917	0.59035	13.092	0.4357
13.1002	0.1475	13.1003	0.19905	13.1003	0.1418	13.1002	0.4171	13.1	0.58995	13.1003	0.4362
13.1085	0.14745	13.1087	0.20065	13.1087	0.14035	13.1085	0.4139	13.1083	0.5872	13.1087	0.4354
13.1168	0.1475	13.117	0.2021	13.117	0.1416	13.1168	0.4075	13.1167	0.58725	13.117	0.43385
13.1252	0.1462	13.1253	0.2028	13.1253	0.14335	13.1252	0.403	13.125	0.58725	13.1253	0.4327
13.1335	0.14625	13.1337	0.2037	13.1337	0.14315	13.1335	0.3939	13.1333	0.58535	13.1337	0.43375
13.1418	0.14605	13.142	0.2054	13.142	0.14585	13.1418	0.38495	13.1417	0.5836	13.142	0.4334
13.1502	0.1459	13.1503	0.20695	13.1503	0.14765	13.1502	0.3774	13.15	0.58195	13.1503	0.4324
13.1585	0.14405	13.1587	0.207	13.1587	0.1467	13.1585	0.36785	13.1583	0.57835	13.1587	0.4307
13.1668	0.14565	13.167	0.2069	13.167	0.1484	13.1668	0.3581	13.1667	0.57755	13.167	0.43305
13.1752	0.14425	13.1753	0.2057	13.1753	0.15005	13.1752	0.34785	13.175	0.57435	13.1753	0.43175
13.1835	0.1445	13.1837	0.20555	13.1837	0.15085	13.1835	0.3369	13.1833	0.5727	13.1837	0.43225
13.1918	0.1436	13.192	0.20565	13.192	0.1531	13.1918	0.32355	13.1917	0.5704	13.192	0.43365
13.2002	0.14365	13.2003	0.2049	13.2003	0.1537	13.2002	0.3164	13.2	0.56805	13.2003	0.4348
13.2085	0.14395	13.2087	0.2037	13.2087	0.15385	13.2085	0.301	13.2083	0.5646	13.2087	0.43435
13.2168	0.14275	13.217	0.2027	13.217	0.1535	13.2168	0.2895	13.2167	0.56245	13.217	0.43485
13.2252	0.14255	13.2253	0.19975	13.2253	0.1534	13.2252	0.2768	13.225	0.5614	13.2253	0.4355
13.2335	0.14255	13.2337	0.199	13.2337	0.15485	13.2335	0.267	13.2333	0.5611	13.2337	0.43615
13.2418	0.1427	13.242	0.19715	13.242	0.15455	13.2418	0.2532	13.2417	0.55985	13.242	0.4364
13.2502	0.14025	13.2503	0.19535	13.2503	0.15365	13.2502	0.24245	13.25	0.5589	13.2503	0.4375
13.2585	0.1403	13.2587	0.1932	13.2587	0.1518	13.2585	0.23275	13.2583	0.55985	13.2587	0.43835
13.2668	0.13945	13.267	0.1915	13.267	0.15195	13.2668	0.224	13.2667	0.56075	13.267	0.43805
13.2752	0.1382	13.2753	0.1899	13.2753	0.1512	13.2752	0.21685	13.275	0.561	13.2753	0.4373
13.2835	0.1374	13.2837	0.1875	13.2837	0.14975	13.2835	0.20655	13.2833	0.56255	13.2837	0.4374
13.2918	0.14	13.292	0.1872	13.292	0.149	13.2918	0.1992	13.2917	0.5662	13.292	0.4401
13.3002	0.1391	13.3003	0.1851	13.3003	0.14865	13.3002	0.1923	13.3	0.57	13.3003	0.4394
13.3085	0.1381	13.3087	0.18335	13.3087	0.1469	13.3085	0.18675	13.3083	0.57185	13.3087	0.4376
13.3168	0.1384	13.317	0.1817	13.317	0.1476	13.3168	0.1801	13.3167	0.5765	13.317	0.43855
13.3252	0.13915	13.3253	0.18165	13.3253	0.14715	13.3252	0.17715	13.325	0.58015	13.3253	0.4384
13.3335	0.1382	13.3337	0.17915	13.3337	0.14585	13.3335	0.17125	13.3333	0.58405	13.3337	0.4375
13.3418	0.13725	13.342	0.17895	13.342	0.1451	13.3418	0.16815	13.3417	0.5899	13.342	0.4378
13.3502	0.13605	13.3503	0.17685	13.3503	0.1424	13.3502	0.1653	13.35	0.59435	13.3503	0.43645
13.3585	0.138	13.3587	0.17735	13.3587	0.14235	13.3585	0.16225	13.3583	0.6001	13.3587	0.43545
13.3668	0.1386	13.367	0.1764	13.367	0.1427	13.3668	0.16255	13.3667	0.6081	13.367	0.4351
13.3752	0.1368	13.3753	0.1763	13.3753	0.1408	13.3752	0.16195	13.375	0.6141	13.3753	0.43335
13.3835	0.13815	13.3837	0.1755	13.3837	0.14305	13.3835	0.15845	13.3833	0.62175	13.3837	0.43355
13.3918	0.13765	13.392	0.17525	13.392	0.1419	13.3918	0.15685	13.3917	0.62805	13.392	0.43165
13.4002	0.13715	13.4003	0.17335	13.4003	0.14125	13.4002	0.15565	13.4	0.63445	13.4003	0.42985
13.4085	0.13705	13.4087	0.1737	13.4087	0.1409	13.4085	0.15525	13.4083	0.64175	13.4087	0.43
13.4168	0.13695	13.417	0.1737	13.417	0.13975	13.4168	0.154	13.4167	0.6486	13.417	0.42935
13.4252	0.1373	13.4253	0.17325	13.4253	0.1404	13.4252	0.15205	13.425	0.65485	13.4253	0.4301
13.4335	0.1363	13.4337	0.17475	13.4337	0.14105	13.4335	0.1528	13.4333	0.6639	13.4337	0.43125
13.4418	0.1384	13.442	0.1738	13.442	0.1421	13.4418	0.1542	13.4417	0.67065	13.442	0.43095
13.4502	0.13775	13.4503	0.1738	13.4503	0.141	13.4502	0.1541	13.45	0.67555	13.4503	0.4298
13.4585	0.13965	13.4587	0.176	13.4587	0.144	13.4585	0.1547	13.4583	0.684	13.4587	0.4318
13.4668	0.14015	13.467	0.17595	13.467	0.1442	13.4668	0.1559	13.4667	0.69035	13.467	0.43185
13.4752	0.14165	13.4753	0.17875	13.4753	0.14725	13.4752	0.1571	13.475	0.6967	13.4753	0.43555
13.4835	0.1443	13.4837	0.17935	13.4837	0.1495	13.4835	0.1586	13.4833	0.70445	13.4837	0.4373
13.4918	0.14675	13.492	0.18295	13.492	0.1523	13.4918	0.1606	13.4917	0.71195	13.492	0.4413
13.5002	0.1484	13.5003	0.1841	13.5003	0.15345	13.5002	0.1604	13.5	0.71735	13.5003	0.44385
13.5085	0.15175	13.5087	0.1864	13.5087	0.1584	13.5085	0.16275	13.5083	0.7236	13.5087	0.4459
13.5168	0.15575	13.517	0.1895	13.517	0.16195	13.5168	0.17005	13.5167	0.7286	13.517	0.4523
13.5252	0.15785	13.5253	0.19245	13.5253	0.1659	13.5252	0.17115	13.525	0.73295	13.5253	0.4564
13.5335	0.1607	13.5337	0.1963	13.5337	0.16965	13.5335	0.1748	13.5333	0.73885	13.5337	0.46145
13.5418	0.16545	13.542	0.20195	13.542	0.17575	13.5418	0.17855	13.5417	0.7448	13.542	0.46775
13.5502	0.1717	13.5503	0.2073	13.5503	0.1814	13.5502	0.18575	13.55	0.74995	13.5503	0.4741
13.5585	0.17565	13.5587	0.21395	13.5587	0.1881	13.5585	0.1909	13.5583	0.75495	13.5587	0.4792
13.5668	0.18465	13.567	0.22175	13.567	0.19555	13.5668	0.1962	13.5667	0.7594	13.567	0.48805
13.5752	0.1898	13.5753	0.2287	13.5753	0.20425	13.5752	0.20285	13.575	0.76215	13.5753	0.4965
13.5835	0.19525	13.5837	0.2365	13.5837	0.21095	13.5835	0.2083	13.5833	0.76445	13.5837	0.50095
13.5918	0.20265	13.592	0.2436	13.592	0.21775	13.5918	0.21445	13.5917	0.76835	13.592	0.5094
13.6002	0.21175	13.6003	0.25325	13.6003	0.2276	13.6002	0.2206	13.6	0.77165	13.6003	0.51825
13.6085	0.2208	13.6087	0.26215	13.6087	0.2371	13.6085	0.2288	13.6083	0.7731	13.6087	0.5266
13.6168	0.2278	13.617	0.27085	13.617	0.24555	13.6168	0.23285	13.6167	0.77685	13.617	0.5329
13.6252	0.2374	13.6253	0.2821	13.6253	0.25405	13.6252	0.24005	13.625	0.7797	13.6253	0.54265
13.6335	0.24475	13.6337	0.29125	13.6337	0.26455	13.6335	0.2481	13.6333	0.7812	13.6337	0.5511
13.6418	0.25315	13.642	0.29935	13.642	0.27225	13.6418	0.2555	13.6417	0.78195	13.642	0.55825
13.6502	0.2625	13.6503	0.3109	13.6503	0.28055	13.6502	0.2618	13.65	0.785	13.6503	0.5678
13.6585	0.2721	13.6587	0.3214	13.6587	0.2917	13.6585	0.27075	13.6583	0.7873	13.6587	0.5759
13.6668	0.2828	13.667	0.33015	13.667	0.29915	13.6668	0.2797	13.6667	0.7877	13.667	0.5814
13.6752	0.291	13.6753	0.34045	13.6753	0.30855	13.6752	0.2886	13.675	0.7909	13.6753	0.58965
13.6835	0.30035	13.6837	0.34835	13.6837	0.3169	13.6835	0.3015	13.6833	0.79105	13.6837	0.59705
13.6918	0.3105	13.692	0.35755	13.692	0.3253	13.6918	0.31315	13.6917	0.79375	13.692	0.6036
13.7002	0.3184	13.7003	0.36605	13.7003	0.33385	13.7002	0.32525	13.7	0.79465	13.7003	0.60935
13.7085	0.32675	13.7087	0.372	13.7087	0.33875	13.7085	0.3377	13.7083	0.7941	13.7087	0.61425
13.7168	0.33525	13.717	0.3777	13.717	0.3456	13.7168	0.3529	13.7167	0.79605	13.717	0.61835
13.7252	0.34235	13.7253	0.384	13.7253	0.3519	13.7252	0.37375	13.725	0.79615	13.7253	0.62465
13.7335	0.34945	13.7337	0.39	13.7337	0.35665	13.7335	0.3928	13.7333	0.79635	13.7337	0.6297
13.7418	0.35655	13.742	0.39375	13.742	0.36295	13.7418	0.4157	13.7417	0.797	13.742	0.63465
13.7502	0.364	13.7503	0.39675	13.7503	0.3666	13.7502	0.445	13.75	0.79725	13.7503	0.63785
13.7585	0.3702	13.7587	0.4002	13.7587	0.37095	13.7585	0.47465	13.7583	0.7969	13.7587	0.6416
13.7668	0.37535	13.767	0.40055	13.767	0.37365	13.7668	0.5097	13.7667	0.7955	13.767	0.64355
13.7752	0.3791	13.7753	0.4031	13.7753	0.3763	13.7752	0.5498	13.775	0.79405	13.7753	0.6461
13.7835	0.38335	13.7837	0.4043	13.7837	0.37985	13.7835	0.59365	13.7833	0.7935	13.7837	0.64935
13.7918	0.38845	13.792	0.4033	13.792	0.3814	13.7918	0.64925	13.7917	0.7921	13.792	0.652
13.8002	0.391	13.8003	0.4021	13.8003	0.38235	13.8002	0.70635	13.8	0.78815	13.8003	0.65065
13.8085	0.3949	13.8087	0.40145	13.8087	0.3845	13.8085	0.7692	13.8083	0.7859	13.8087	0.6538
13.8168	0.3976	13.817	0.3966	13.817	0.38225	13.8168	0.83635	13.8167	0.7801	13.817	0.6554
13.8252	0.4014	13.8253	0.3922	13.8253	0.38365	13.8252	0.90835	13.825	0.7764	13.8253	0.65655
13.8335	0.40295	13.8337	0.3865	13.8337	0.3838	13.8335	0.98215	13.8333	0.7686	13.8337	0.6581
13.8418	0.40445	13.842	0.37955	13.842	0.3814	13.8418	1.05535	13.8417	0.7605	13.842	0.6573
13.8502	0.40745	13.8503	0.3723	13.8503	0.38035	13.8502	1.1268	13.85	0.7528	13.8503	0.65915
13.8585	0.4113	13.8587	0.366	13.8587	0.37985	13.8585	1.1932	13.8583	0.7447	13.8587	0.6608
13.8668	0.4116	13.867	0.3577	13.867	0.37675	13.8668	1.25725	13.8667	0.73455	13.867	0.6609
13.8752	0.41145	13.8753	0.34715	13.8753	0.37105	13.8752	1.31385	13.875	0.7231	13.8753	0.65955
13.8835	0.4138	13.8837	0.3365	13.8837	0.3664	13.8835	1.3595	13.8833	0.7106	13.8837	0.65855
13.8918	0.4142	13.892	0.32615	13.892	0.36185	13.8918	1.3974	13.8917	0.6977	13.892	0.6579
13.9002	0.4137	13.9003	0.3147	13.9003	0.3555	13.9002	1.42775	13.9	0.68505	13.9003	0.65735
13.9085	0.41235	13.9087	0.304	13.9087	0.3484	13.9085	1.4492	13.9083	0.6707	13.9087	0.65395
13.9168	0.4137	13.917	0.2922	13.917	0.34	13.9168	1.45895	13.9167	0.65755	13.917	0.65255
13.9252	0.4148	13.9253	0.28335	13.9253	0.332	13.9252	1.4653	13.925	0.64445	13.9253	0.6515
13.9335	0.41515	13.9337	0.27075	13.9337	0.3229	13.9335	1.46175	13.9333	0.6289	13.9337	0.6471
13.9418	0.41215	13.942	0.2581	13.942	0.3129	13.9418	1.4528	13.9417	0.6136	13.942	0.64275
13.9502	0.4093	13.9503	0.24885	13.9503	0.3025	13.9502	1.43715	13.95	0.5983	13.9503	0.6393
13.9585	0.40765	13.9587	0.23815	13.9587	0.29245	13.9585	1.41525	13.9583	0.58455	13.9587	0.6318
13.9668	0.4041	13.967	0.2282	13.967	0.2777	13.9668	1.3915	13.9667	0.5697	13.967	0.62585
13.9752	0.4026	13.9753	0.2194	13.9753	0.26775	13.9752	1.3637	13.975	0.5591	13.9753	0.6202
13.9835	0.3982	13.9837	0.2118	13.9837	0.25505	13.9835	1.3305	13.9833	0.5468	13.9837	0.6121
13.9918	0.3938	13.992	0.2046	13.992	0.2455	13.9918	1.29715	13.9917	0.53755	13.992	0.60305
14.0002	0.38755	14.0003	0.1972	14.0003	0.2336	14.0002	1.26055	14	0.5283	14.0003	0.5923
14.0085	0.38215	14.0087	0.18955	14.0087	0.2235	14.0085	1.22765	14.0083	0.51825	14.0087	0.58375
14.0168	0.3761	14.017	0.18535	14.017	0.2136	14.0168	1.1912	14.0167	0.5109	14.017	0.57285
14.0252	0.3661	14.0253	0.1799	14.0253	0.2043	14.0252	1.1526	14.025	0.504	14.0253	0.56125
14.0335	0.35715	14.0337	0.17655	14.0337	0.1938	14.0335	1.11865	14.0333	0.4976	14.0337	0.5497
14.0418	0.34945	14.042	0.17035	14.042	0.1857	14.0418	1.0825	14.0417	0.49155	14.042	0.53885
14.0502	0.3385	14.0503	0.16765	14.0503	0.1772	14.0502	1.0467	14.05	0.49005	14.0503	0.5257
14.0585	0.32935	14.0587	0.164	14.0587	0.17025	14.0585	1.011	14.0583	0.4842	14.0587	0.5124
14.0668	0.31515	14.067	0.15955	14.067	0.16195	14.0668	0.9795	14.0667	0.4794	14.067	0.49915
14.0752	0.306	14.0753	0.15965	14.0753	0.1584	14.0752	0.94795	14.075	0.47975	14.0753	0.4899
14.0835	0.29295	14.0837	0.1554	14.0837	0.1504	14.0835	0.91765	14.0833	0.4756	14.0837	0.4748
14.0918	0.28015	14.092	0.15345	14.092	0.1463	14.0918	0.8864	14.0917	0.47475	14.092	0.4644
14.1002	0.2679	14.1003	0.1527	14.1003	0.1426	14.1002	0.85855	14.1	0.474	14.1003	0.4534
14.1085	0.25665	14.1087	0.151	14.1087	0.14125	14.1085	0.82865	14.1083	0.4733	14.1087	0.44285
14.1168	0.24705	14.117	0.1513	14.117	0.1395	14.1168	0.8056	14.1167	0.47475	14.117	0.4355
14.1252	0.2341	14.1253	0.14975	14.1253	0.1359	14.1252	0.78145	14.125	0.47235	14.1253	0.42655
14.1335	0.2228	14.1337	0.14775	14.1337	0.1333	14.1335	0.75515	14.1333	0.47165	14.1337	0.41755
14.1418	0.21375	14.142	0.1461	14.142	0.1331	14.1418	0.7325	14.1417	0.47335	14.142	0.4118
14.1502	0.2047	14.1503	0.1463	14.1503	0.13235	14.1502	0.7091	14.15	0.47155	14.1503	0.4031
14.1585	0.1944	14.1587	0.14535	14.1587	0.1318	14.1585	0.68795	14.1583	0.47465	14.1587	0.39825
14.1668	0.18695	14.167	0.1444	14.167	0.1337	14.1668	0.669	14.1667	0.4776	14.167	0.39335
14.1752	0.17805	14.1753	0.14385	14.1753	0.13285	14.1752	0.65125	14.175	0.4817	14.1753	0.38785
14.1835	0.17225	14.1837	0.144	14.1837	0.135	14.1835	0.634	14.1833	0.48605	14.1837	0.38465
14.1918	0.1656	14.192	0.14325	14.192	0.13625	14.1918	0.6147	14.1917	0.49385	14.192	0.3809
14.2002	0.1594	14.2003	0.14275	14.2003	0.1376	14.2002	0.5975	14.2	0.50145	14.2003	0.37815
14.2085	0.1559	14.2087	0.14485	14.2087	0.1422	14.2085	0.5816	14.2083	0.5127	14.2087	0.3752
14.2168	0.1491	14.217	0.14365	14.217	0.14475	14.2168	0.5684	14.2167	0.5242	14.217	0.3731
14.2252	0.14575	14.2253	0.1431	14.2253	0.1492	14.2252	0.55075	14.225	0.53875	14.2253	0.3722
14.2335	0.14165	14.2337	0.1443	14.2337	0.1538	14.2335	0.54045	14.2333	0.55735	14.2337	0.37145
14.2418	0.1397	14.242	0.1452	14.242	0.15695	14.2418	0.5236	14.2417	0.5781	14.242	0.36905
14.2502	0.1366	14.2503	0.1424	14.2503	0.1602	14.2502	0.51285	14.25	0.59865	14.2503	0.36785
14.2585	0.1332	14.2587	0.1455	14.2587	0.16745	14.2585	0.5121	14.2583	0.62155	14.2587	0.3681
14.2668	0.13185	14.267	0.1446	14.267	0.17165	14.2668	0.5104	14.2667	0.6461	14.267	0.36765
14.2752	0.12765	14.2753	0.14675	14.2753	0.17675	14.2752	0.4666	14.275	0.6726	14.2753	0.367
14.2835	0.12615	14.2837	0.14645	14.2837	0.18115	14.2835	0.47945	14.2833	0.6985	14.2837	0.36645
14.2918	0.12575	14.292	0.1495	14.292	0.1888	14.2918	0.45665	14.2917	0.7251	14.292	0.36695
14.3002	0.1242	14.3003	0.15	14.3003	0.19255	14.3002	0.4411	14.3	0.7495	14.3003	0.36805
14.3085	0.12325	14.3087	0.1502	14.3087	0.1946	14.3085	0.43105	14.3083	0.7724	14.3087	0.367
14.3168	0.12125	14.317	0.154	14.317	0.20055	14.3168	0.4217	14.3167	0.7944	14.317	0.3671
14.3252	0.1192	14.3253	0.1543	14.3253	0.2051	14.3252	0.413	14.325	0.8161	14.3253	0.36665
14.3335	0.1194	14.3337	0.15775	14.3337	0.20925	14.3335	0.40565	14.3333	0.8332	14.3337	0.3663
14.3418	0.11665	14.342	0.1589	14.342	0.2103	14.3418	0.3953	14.3417	0.84925	14.342	0.36615
14.3502	0.11595	14.3503	0.16415	14.3503	0.2172	14.3502	0.38555	14.35	0.8651	14.3503	0.36685
14.3585	0.117	14.3587	0.16925	14.3587	0.22165	14.3585	0.3778	14.3583	0.87785	14.3587	0.36875
14.3668	0.1161	14.367	0.17215	14.367	0.22805	14.3668	0.3689	14.3667	0.8891	14.367	0.368
14.3752	0.11445	14.3753	0.17875	14.3753	0.23135	14.3752	0.36385	14.375	0.89805	14.3753	0.3688
14.3835	0.1159	14.3837	0.1863	14.3837	0.2397	14.3835	0.3552	14.3833	0.90705	14.3837	0.3691
14.3918	0.11355	14.392	0.193	14.392	0.245	14.3918	0.34815	14.3917	0.9134	14.392	0.37005
14.4002	0.11065	14.4003	0.2013	14.4003	0.25235	14.4002	0.343	14.4	0.9219	14.4003	0.37095
14.4085	0.1116	14.4087	0.21245	14.4087	0.26255	14.4085	0.334	14.4083	0.9317	14.4087	0.37475
14.4168	0.1123	14.417	0.22315	14.417	0.2757	14.4168	0.3265	14.4167	0.94255	14.417	0.37835
14.4252	0.11335	14.4253	0.23775	14.4253	0.29055	14.4252	0.3233	14.425	0.9565	14.4253	0.38345
14.4335	0.1106	14.4337	0.25015	14.4337	0.3043	14.4335	0.3172	14.4333	0.9685	14.4337	0.38545
14.4418	0.1116	14.442	0.265	14.442	0.31955	14.4418	0.312	14.4417	0.9853	14.442	0.39175
14.4502	0.11	14.4503	0.28235	14.4503	0.33925	14.4502	0.3066	14.45	1.0063	14.4503	0.3982
14.4585	0.11155	14.4587	0.30065	14.4587	0.35925	14.4585	0.3013	14.4583	1.03365	14.4587	0.40565
14.4668	0.1089	14.467	0.32095	14.467	0.3769	14.4668	0.29405	14.4667	1.06225	14.467	0.4118
14.4752	0.10935	14.4753	0.34585	14.4753	0.39855	14.4752	0.2917	14.475	1.1017	14.4753	0.42185
14.4835	0.1089	14.4837	0.37625	14.4837	0.41825	14.4835	0.28605	14.4833	1.1455	14.4837	0.43345
14.4918	0.10905	14.492	0.4105	14.492	0.4405	14.4918	0.2798	14.4917	1.197	14.492	0.44415
14.5002	0.1077	14.5003	0.45285	14.5003	0.4601	14.5002	0.2777	14.5	1.2513	14.5003	0.45675
14.5085	0.1086	14.5087	0.50665	14.5087	0.481	14.5085	0.2735	14.5083	1.31335	14.5087	0.46985
14.5168	0.10685	14.517	0.56695	14.517	0.4976	14.5168	0.26865	14.5167	1.37485	14.517	0.47885
14.5252	0.10745	14.5253	0.6394	14.5253	0.51615	14.5252	0.26365	14.525	1.43665	14.5253	0.49535
14.5335	0.1066	14.5337	0.7199	14.5337	0.53305	14.5335	0.26265	14.5333	1.4992	14.5337	0.5095
14.5418	0.10525	14.542	0.8084	14.542	0.54685	14.5418	0.2582	14.5417	1.5564	14.542	0.52035
14.5502	0.1068	14.5503	0.90215	14.5503	0.5626	14.5502	0.25395	14.55	1.6114	14.5503	0.5351
14.5585	0.10485	14.5587	0.9968	14.5587	0.57875	14.5585	0.25025	14.5583	1.6561	14.5587	0.54705
14.5668	0.1096	14.567	1.0912	14.567	0.59425	14.5668	0.2449	14.5667	1.69825	14.567	0.5636
14.5752	0.10715	14.5753	1.17555	14.5753	0.60605	14.5752	0.242	14.575	1.72205	14.5753	0.5747
14.5835	0.1067	14.5837	1.2532	14.5837	0.61735	14.5835	0.23655	14.5833	1.74145	14.5837	0.5888
14.5918	0.1061	14.592	1.31885	14.592	0.62955	14.5918	0.235	14.5917	1.7498	14.592	0.60125
14.6002	0.10625	14.6003	1.37095	14.6003	0.64035	14.6002	0.232	14.6	1.74975	14.6003	0.6135
14.6085	0.1087	14.6087	1.4132	14.6087	0.65515	14.6085	0.2278	14.6083	1.7417	14.6087	0.6294
14.6168	0.10685	14.617	1.43995	14.617	0.66815	14.6168	0.2259	14.6167	1.7248	14.617	0.64535
14.6252	0.1067	14.6253	1.45275	14.6253	0.678	14.6252	0.22255	14.625	1.70065	14.6253	0.66025
14.6335	0.10755	14.6337	1.4522	14.6337	0.6886	14.6335	0.22055	14.6333	1.66855	14.6337	0.67865
14.6418	0.10535	14.642	1.43945	14.642	0.69865	14.6418	0.2181	14.6417	1.6305	14.642	0.69725
14.6502	0.10645	14.6503	1.41845	14.6503	0.7077	14.6502	0.21515	14.65	1.59065	14.6503	0.7214
14.6585	0.10505	14.6587	1.38835	14.6587	0.71185	14.6585	0.21435	14.6583	1.54395	14.6587	0.7433
14.6668	0.1071	14.667	1.3504	14.667	0.71815	14.6668	0.21185	14.6667	1.49675	14.667	0.7715
14.6752	0.10845	14.6753	1.307	14.6753	0.723	14.6752	0.2092	14.675	1.4475	14.6753	0.8018
14.6835	0.1072	14.6837	1.25895	14.6837	0.7223	14.6835	0.2065	14.6833	1.3968	14.6837	0.8335
14.6918	0.1048	14.692	1.2083	14.692	0.7196	14.6918	0.2048	14.6917	1.3424	14.692	0.86795
14.7002	0.1058	14.7003	1.154	14.7003	0.7159	14.7002	0.2048	14.7	1.29085	14.7003	0.9036
14.7085	0.10655	14.7087	1.0994	14.7087	0.70645	14.7085	0.20375	14.7083	1.2372	14.7087	0.9394
14.7168	0.1045	14.717	1.0436	14.717	0.69625	14.7168	0.20255	14.7167	1.18515	14.717	0.9756
14.7252	0.1043	14.7253	0.988	14.7253	0.68315	14.7252	0.202	14.725	1.13405	14.7253	1.01125
14.7335	0.1048	14.7337	0.9335	14.7337	0.66665	14.7335	0.20025	14.7333	1.08295	14.7337	1.0461
14.7418	0.1061	14.742	0.8806	14.742	0.6491	14.7418	0.19835	14.7417	1.03575	14.742	1.07785
14.7502	0.1039	14.7503	0.82945	14.7503	0.62925	14.7502	0.19575	14.75	0.99055	14.7503	1.1064
14.7585	0.10545	14.7587	0.7781	14.7587	0.60685	14.7585	0.1929	14.7583	0.94465	14.7587	1.1313
14.7668	0.10545	14.767	0.73225	14.767	0.5853	14.7668	0.1924	14.7667	0.9042	14.767	1.1514
14.7752	0.1053	14.7753	0.6871	14.7753	0.5613	14.7752	0.1929	14.775	0.86475	14.7753	1.1669
14.7835	0.1034	14.7837	0.6419	14.7837	0.5365	14.7835	0.1902	14.7833	0.82635	14.7837	1.1729
14.7918	0.1033	14.792	0.6018	14.792	0.51175	14.7918	0.1868	14.7917	0.79055	14.792	1.17745
14.8002	0.10455	14.8003	0.56515	14.8003	0.48815	14.8002	0.188	14.8	0.7596	14.8003	1.17765
14.8085	0.1035	14.8087	0.5307	14.8087	0.4654	14.8085	0.18715	14.8083	0.7304	14.8087	1.1734
14.8168	0.1046	14.817	0.49475	14.817	0.4389	14.8168	0.1853	14.8167	0.70165	14.817	1.16295
14.8252	0.1034	14.8253	0.4653	14.8253	0.41785	14.8252	0.1857	14.825	0.6768	14.8253	1.15015
14.8335	0.1047	14.8337	0.4386	14.8337	0.3945	14.8335	0.1847	14.8333	0.65465	14.8337	1.13505
14.8418	0.10385	14.842	0.41375	14.842	0.3715	14.8418	0.18225	14.8417	0.6319	14.842	1.1137
14.8502	0.104	14.8503	0.3902	14.8503	0.3518	14.8502	0.1818	14.85	0.6129	14.8503	1.09235
14.8585	0.10325	14.8587	0.36945	14.8587	0.3318	14.8585	0.18315	14.8583	0.59515	14.8587	1.06875
14.8668	0.1024	14.867	0.34825	14.867	0.3128	14.8668	0.18325	14.8667	0.5788	14.867	1.04175
14.8752	0.103	14.8753	0.33115	14.8753	0.2971	14.8752	0.18295	14.875	0.5637	14.8753	1.01685
14.8835	0.1023	14.8837	0.3149	14.8837	0.2826	14.8835	0.18285	14.8833	0.5502	14.8837	0.9922
14.8918	0.10195	14.892	0.29925	14.892	0.2674	14.8918	0.1825	14.8917	0.53695	14.892	0.9636
14.9002	0.10225	14.9003	0.288	14.9003	0.25515	14.9002	0.18385	14.9	0.5255	14.9003	0.93965
14.9085	0.10275	14.9087	0.27625	14.9087	0.2431	14.9085	0.183	14.9083	0.51635	14.9087	0.9129
14.9168	0.10125	14.917	0.26385	14.917	0.2309	14.9168	0.18395	14.9167	0.5042	14.917	0.8869
14.9252	0.10025	14.9253	0.25475	14.9253	0.22065	14.9252	0.1864	14.925	0.49555	14.9253	0.86205
14.9335	0.10125	14.9337	0.2443	14.9337	0.2113	14.9335	0.18545	14.9333	0.48665	14.9337	0.8373
14.9418	0.1024	14.942	0.2375	14.942	0.2038	14.9418	0.1856	14.9417	0.4801	14.942	0.81495
14.9502	0.1021	14.9503	0.22805	14.9503	0.1961	14.9502	0.18745	14.95	0.4714	14.9503	0.79245
14.9585	0.10145	14.9587	0.22145	14.9587	0.1884	14.9585	0.18965	14.9583	0.4642	14.9587	0.76945
14.9668	0.1012	14.967	0.21435	14.967	0.18155	14.9668	0.191	14.9667	0.4575	14.967	0.7483
14.9752	0.1015	14.9753	0.20725	14.9753	0.17675	14.9752	0.1947	14.975	0.45235	14.9753	0.72975
14.9835	0.1023	14.9837	0.2042	14.9837	0.17285	14.9835	0.1946	14.9833	0.44735	14.9837	0.7128
14.9918	0.10095	14.992	0.19955	14.992	0.16855	14.9918	0.1976	14.9917	0.4432	14.992	0.694
15.0002	0.1014	15.0003	0.19565	15.0003	0.1655	15.0002	0.19995	15	0.43755	15.0003	0.6778
15.0085	0.10085	15.0087	0.19155	15.0087	0.1631	15.0085	0.20235	15.0083	0.43395	15.0087	0.6631
15.0168	0.1013	15.017	0.1874	15.017	0.1593	15.0168	0.2037	15.0167	0.42995	15.017	0.64815
15.0252	0.099	15.0253	0.1817	15.0253	0.1544	15.0252	0.2058	15.025	0.42375	15.0253	0.6316
15.0335	0.09835	15.0337	0.17875	15.0337	0.15265	15.0335	0.20785	15.0333	0.42315	15.0337	0.62015
15.0418	0.0999	15.042	0.1775	15.042	0.1507	15.0418	0.2092	15.0417	0.42135	15.042	0.607
15.0502	0.09935	15.0503	0.17175	15.0503	0.15015	15.0502	0.21315	15.05	0.41775	15.0503	0.5943
15.0585	0.0982	15.0587	0.1705	15.0587	0.14825	15.0585	0.214	15.0583	0.41525	15.0587	0.5827
15.0668	0.0993	15.067	0.16835	15.067	0.14695	15.0668	0.21605	15.0667	0.41285	15.067	0.57185
15.0752	0.0998	15.0753	0.1653	15.0753	0.1465	15.0752	0.21555	15.075	0.41035	15.0753	0.56215
15.0835	0.0996	15.0837	0.16445	15.0837	0.1447	15.0835	0.21685	15.0833	0.40795	15.0837	0.5532
15.0918	0.0976	15.092	0.1611	15.092	0.1421	15.0918	0.2156	15.0917	0.40565	15.092	0.5421
15.1002	0.09775	15.1003	0.15715	15.1003	0.1422	15.1002	0.21835	15.1	0.40275	15.1003	0.5323
15.1085	0.09585	15.1087	0.1546	15.1087	0.1409	15.1085	0.21815	15.1083	0.401	15.1087	0.52365
15.1168	0.0965	15.117	0.15485	15.117	0.1401	15.1168	0.21735	15.1167	0.399	15.117	0.5135
15.1252	0.0952	15.1253	0.15285	15.1253	0.1395	15.1252	0.21645	15.125	0.39805	15.1253	0.50805
15.1335	0.09495	15.1337	0.1514	15.1337	0.13905	15.1335	0.218	15.1333	0.39565	15.1337	0.5003
15.1418	0.09575	15.142	0.149	15.142	0.13975	15.1418	0.21835	15.1417	0.39475	15.142	0.49405
15.1502	0.0953	15.1503	0.1463	15.1503	0.13765	15.1502	0.21985	15.15	0.39275	15.1503	0.4858
15.1585	0.09375	15.1587	0.14565	15.1587	0.13775	15.1585	0.22125	15.1583	0.39245	15.1587	0.48
15.1668	0.09275	15.167	0.14445	15.167	0.1386	15.1668	0.22435	15.1667	0.39035	15.167	0.4742
15.1752	0.09425	15.1753	0.14515	15.1753	0.137	15.1752	0.22935	15.175	0.3898	15.1753	0.46785
15.1835	0.09305	15.1837	0.14245	15.1837	0.13605	15.1835	0.23495	15.1833	0.3887	15.1837	0.46145
15.1918	0.09475	15.192	0.1425	15.192	0.13905	15.1918	0.2418	15.1917	0.3893	15.192	0.4569
15.2002	0.0918	15.2003	0.13825	15.2003	0.13615	15.2002	0.25235	15.2	0.3859	15.2003	0.44935
15.2085	0.09395	15.2087	0.1379	15.2087	0.1367	15.2085	0.2667	15.2083	0.3866	15.2087	0.44505
15.2168	0.09105	15.217	0.13655	15.217	0.1342	15.2168	0.28145	15.2167	0.38215	15.217	0.43795
15.2252	0.0923	15.2253	0.13485	15.2253	0.1355	15.2252	0.3038	15.225	0.3834	15.2253	0.43305
15.2335	0.09265	15.2337	0.1337	15.2337	0.13565	15.2335	0.32835	15.2333	0.38165	15.2337	0.4284
15.2418	0.0928	15.242	0.1343	15.242	0.1366	15.2418	0.35775	15.2417	0.38195	15.242	0.4254
15.2502	0.09045	15.2503	0.1316	15.2503	0.13225	15.2502	0.39	15.25	0.37715	15.2503	0.41835
15.2585	0.09225	15.2587	0.13255	15.2587	0.13405	15.2585	0.43335	15.2583	0.37775	15.2587	0.4168
15.2668	0.09065	15.267	0.1295	15.267	0.13295	15.2668	0.4777	15.2667	0.3758	15.267	0.41255
15.2752	0.08955	15.2753	0.1287	15.2753	0.13245	15.2752	0.5288	15.275	0.37575	15.2753	0.4058
15.2835	0.08925	15.2837	0.12755	15.2837	0.13155	15.2835	0.58205	15.2833	0.37445	15.2837	0.4033
15.2918	0.0899	15.292	0.1263	15.292	0.1314	15.2918	0.64505	15.2917	0.37245	15.292	0.40115
15.3002	0.08765	15.3003	0.12455	15.3003	0.12925	15.3002	0.71425	15.3	0.3716	15.3003	0.3961
15.3085	0.0891	15.3087	0.12655	15.3087	0.1296	15.3085	0.78365	15.3083	0.37085	15.3087	0.39335
15.3168	0.08795	15.317	0.12295	15.317	0.12825	15.3168	0.85895	15.3167	0.3689	15.317	0.389
15.3252	0.08965	15.3253	0.12395	15.3253	0.1288	15.3252	0.9363	15.325	0.36945	15.3253	0.3875
15.3335	0.08805	15.3337	0.1217	15.3337	0.1264	15.3335	1.0166	15.3333	0.3677	15.3337	0.3837
15.3418	0.0874	15.342	0.121	15.342	0.12275	15.3418	1.09825	15.3417	0.3663	15.342	0.38125
15.3502	0.0854	15.3503	0.1196	15.3503	0.121	15.3502	1.17965	15.35	0.36345	15.3503	0.3753
15.3585	0.08695	15.3587	0.12185	15.3587	0.1223	15.3585	1.26085	15.3583	0.36545	15.3587	0.37525
15.3668	0.0863	15.367	0.1202	15.367	0.1214	15.3668	1.3371	15.3667	0.3647	15.367	0.37055
15.3752	0.08485	15.3753	0.1179	15.3753	0.11865	15.3752	1.4086	15.375	0.36295	15.3753	0.3674
15.3835	0.0856	15.3837	0.11865	15.3837	0.11625	15.3835	1.4746	15.3833	0.36245	15.3837	0.36455
15.3918	0.0841	15.392	0.11645	15.392	0.1163	15.3918	1.53295	15.3917	0.36105	15.392	0.36235
15.4002	0.08375	15.4003	0.11635	15.4003	0.1156	15.4002	1.58275	15.4	0.35985	15.4003	0.35925
15.4085	0.08385	15.4087	0.1163	15.4087	0.1121	15.4085	1.6259	15.4083	0.3585	15.4087	0.3568
15.4168	0.0836	15.417	0.1138	15.417	0.1114	15.4168	1.6591	15.4167	0.358	15.417	0.3548
15.4252	0.08295	15.4253	0.11495	15.4253	0.111	15.4252	1.68225	15.425	0.35785	15.4253	0.35335
15.4335	0.0825	15.4337	0.11225	15.4337	0.1091	15.4335	1.6919	15.4333	0.3564	15.4337	0.34935
15.4418	0.0822	15.442	0.11115	15.442	0.1064	15.4418	1.69065	15.4417	0.35345	15.442	0.34545
15.4502	0.08055	15.4503	0.11035	15.4503	0.10605	15.4502	1.6823	15.45	0.35335	15.4503	0.34415
15.4585	0.08005	15.4587	0.11145	15.4587	0.10095	15.4585	1.6608	15.4583	0.35125	15.4587	0.3408
15.4668	0.0795	15.467	0.1079	15.467	0.1005	15.4668	1.6295	15.4667	0.3506	15.467	0.3383
15.4752	0.0784	15.4753	0.10625	15.4753	0.0987	15.4752	1.5886	15.475	0.349	15.4753	0.33705
15.4835	0.07905	15.4837	0.10895	15.4837	0.09875	15.4835	1.53935	15.4833	0.3488	15.4837	0.3361
15.4918	0.07775	15.492	0.1074	15.492	0.0962	15.4918	1.4852	15.4917	0.34685	15.492	0.33195
15.5002	0.07785	15.5003	0.10635	15.5003	0.0946	15.5002	1.4236	15.5	0.3453	15.5003	0.3315
15.5085	0.0771	15.5087	0.1059	15.5087	0.09305	15.5085	1.3558	15.5083	0.3444	15.5087	0.3289
15.5168	0.07725	15.517	0.1054	15.517	0.092	15.5168	1.28505	15.5167	0.3425	15.517	0.3263
15.5252	0.07525	15.5253	0.10355	15.5253	0.08965	15.5252	1.212	15.525	0.3411	15.5253	0.32525
15.5335	0.0776	15.5337	0.1044	15.5337	0.09065	15.5335	1.14075	15.5333	0.3407	15.5337	0.32465
15.5418	0.0753	15.542	0.1035	15.542	0.09	15.5418	1.06745	15.5417	0.3405	15.542	0.32275
15.5502	0.07615	15.5503	0.10305	15.5503	0.08815	15.5502	0.99435	15.55	0.3405	15.5503	0.32085
15.5585	0.0754	15.5587	0.10335	15.5587	0.0863	15.5585	0.92545	15.5583	0.34005	15.5587	0.31885
15.5668	0.07495	15.567	0.10065	15.567	0.08395	15.5668	0.85395	15.5667	0.33955	15.567	0.318
15.5752	0.0754	15.5753	0.10135	15.5753	0.08275	15.5752	0.78985	15.575	0.339	15.5753	0.3156
15.5835	0.0749	15.5837	0.1007	15.5837	0.08295	15.5835	0.72875	15.5833	0.3388	15.5837	0.316
15.5918	0.0738	15.592	0.09895	15.592	0.08085	15.5918	0.67185	15.5917	0.3377	15.592	0.31255
15.6002	0.0725	15.6003	0.09905	15.6003	0.0806	15.6002	0.6181	15.6	0.3385	15.6003	0.311
15.6085	0.0744	15.6087	0.10035	15.6087	0.08	15.6085	0.56885	15.6083	0.3401	15.6087	0.3114
15.6168	0.0717	15.617	0.09745	15.617	0.0781	15.6168	0.52615	15.6167	0.34065	15.617	0.30895
15.6252	0.0725	15.6253	0.098	15.6253	0.0777	15.6252	0.4854	15.625	0.3399	15.6253	0.30755
15.6335	0.07155	15.6337	0.09525	15.6337	0.07615	15.6335	0.4501	15.6333	0.3444	15.6337	0.3067
15.6418	0.07355	15.642	0.09535	15.642	0.07415	15.6418	0.41875	15.6417	0.34195	15.642	0.3034
15.6502	0.0733	15.6503	0.0946	15.6503	0.0744	15.6502	0.388	15.65	0.3502	15.6503	0.30295
15.6585	0.0701	15.6587	0.09205	15.6587	0.0722	15.6585	0.36275	15.6583	0.35235	15.6587	0.30045
15.6668	0.07	15.667	0.0909	15.667	0.07035	15.6668	0.34435	15.6667	0.35605	15.667	0.29845
15.6752	0.0717	15.6753	0.09165	15.6753	0.07085	15.6752	0.3225	15.675	0.3621	15.6753	0.2981
15.6835	0.07315	15.6837	0.0924	15.6837	0.0708	15.6835	0.3033	15.6833	0.36825	15.6837	0.29595
15.6918	0.07145	15.692	0.0907	15.692	0.069	15.6918	0.2885	15.6917	0.37405	15.692	0.29345
15.7002	0.07185	15.7003	0.09045	15.7003	0.0697	15.7002	0.2752	15.7	0.3805	15.7003	0.2925
15.7085	0.0715	15.7087	0.09005	15.7087	0.0678	15.7085	0.26285	15.7083	0.38575	15.7087	0.29055
15.7168	0.07145	15.717	0.08875	15.717	0.06765	15.7168	0.2578	15.7167	0.3926	15.717	0.28735
15.7252	0.0703	15.7253	0.0868	15.7253	0.06715	15.7252	0.24745	15.725	0.39955	15.7253	0.2856
15.7335	0.0691	15.7337	0.0866	15.7337	0.066	15.7335	0.23955	15.7333	0.40435	15.7337	0.2831
15.7418	0.0691	15.742	0.08525	15.742	0.0641	15.7418	0.2309	15.7417	0.4113	15.742	0.28135
15.7502	0.0682	15.7503	0.08455	15.7503	0.06435	15.7502	0.2262	15.75	0.41775	15.7503	0.2788
15.7585	0.0677	15.7587	0.08455	15.7587	0.0632	15.7585	0.2205	15.7583	0.42405	15.7587	0.27755
15.7668	0.06755	15.767	0.08325	15.767	0.0659	15.7668	0.21485	15.7667	0.42965	15.767	0.27615
15.7752	0.0676	15.7753	0.0814	15.7753	0.06565	15.7752	0.21125	15.775	0.4339	15.7753	0.27325
15.7835	0.0677	15.7837	0.0826	15.7837	0.06585	15.7835	0.207	15.7833	0.43935	15.7837	0.27415
15.7918	0.06695	15.792	0.0814	15.792	0.06785	15.7918	0.2045	15.7917	0.44655	15.792	0.27235
15.8002	0.06855	15.8003	0.0821	15.8003	0.072	15.8002	0.2016	15.8	0.4512	15.8003	0.27255
15.8085	0.06695	15.8087	0.0807	15.8087	0.07495	15.8085	0.20105	15.8083	0.4547	15.8087	0.27145
15.8168	0.06645	15.817	0.0802	15.817	0.0821	15.8168	0.1946	15.8167	0.45815	15.817	0.2704
15.8252	0.0656	15.8253	0.0807	15.8253	0.0879	15.8252	0.1914	15.825	0.4608	15.8253	0.27105
15.8335	0.06615	15.8337	0.07965	15.8337	0.09655	15.8335	0.19045	15.8333	0.46425	15.8337	0.2702
15.8418	0.0668	15.842	0.08015	15.842	0.1086	15.8418	0.19005	15.8417	0.468	15.842	0.273
15.8502	0.0655	15.8503	0.0798	15.8503	0.1223	15.8502	0.19625	15.85	0.46865	15.8503	0.2751
15.8585	0.0661	15.8587	0.081	15.8587	0.1376	15.8585	0.2113	15.8583	0.4712	15.8587	0.2773
15.8668	0.06555	15.867	0.0831	15.867	0.1583	15.8668	0.18305	15.8667	0.47335	15.867	0.28265
15.8752	0.0662	15.8753	0.0855	15.8753	0.1794	15.8752	0.18665	15.875	0.4761	15.8753	0.28815
15.8835	0.0665	15.8837	0.08645	15.8837	0.202	15.8835	0.17925	15.8833	0.4774	15.8837	0.2943
15.8918	0.0667	15.892	0.0895	15.892	0.22925	15.8918	0.18135	15.8917	0.4795	15.892	0.30085
15.9002	0.0645	15.9003	0.0917	15.9003	0.25375	15.9002	0.17685	15.9	0.48	15.9003	0.30845
15.9085	0.06515	15.9087	0.09445	15.9087	0.28125	15.9085	0.17375	15.9083	0.48295	15.9087	0.31675
15.9168	0.0654	15.917	0.1009	15.917	0.31095	15.9168	0.1734	15.9167	0.48575	15.917	0.3288
15.9252	0.0656	15.9253	0.1043	15.9253	0.33895	15.9252	0.17455	15.925	0.48825	15.9253	0.3378
15.9335	0.0655	15.9337	0.1111	15.9337	0.3654	15.9335	0.17565	15.9333	0.4908	15.9337	0.3456
15.9418	0.0646	15.942	0.11405	15.942	0.3905	15.9418	0.1731	15.9417	0.49475	15.942	0.3559
15.9502	0.06635	15.9503	0.1202	15.9503	0.4159	15.9502	0.1718	15.95	0.5019	15.9503	0.3676
15.9585	0.0663	15.9587	0.127	15.9587	0.43865	15.9585	0.17155	15.9583	0.50855	15.9587	0.37785
15.9668	0.06585	15.967	0.13295	15.967	0.45735	15.9668	0.172	15.9667	0.5173	15.967	0.3871
15.9752	0.06535	15.9753	0.1378	15.9753	0.47485	15.9752	0.17225	15.975	0.52735	15.9753	0.3942
15.9835	0.0665	15.9837	0.1456	15.9837	0.4933	15.9835	0.17315	15.9833	0.5428	15.9837	0.40605
15.9918	0.0663	15.992	0.1521	15.992	0.5066	15.9918	0.17225	15.9917	0.5568	15.992	0.4129
16.0002	0.06515	16.0003	0.15945	16.0003	0.5182	16.0002	0.1726	16	0.57535	16.0003	0.41775
16.0085	0.06535	16.0087	0.16825	16.0087	0.53025	16.0085	0.17325	16.0083	0.59965	16.0087	0.4239
16.0168	0.0653	16.017	0.1776	16.017	0.5374	16.0168	0.17095	16.0167	0.6254	16.017	0.4299
16.0252	0.0657	16.0253	0.1882	16.0253	0.54695	16.0252	0.17325	16.025	0.6586	16.0253	0.4331
16.0335	0.06725	16.0337	0.19985	16.0337	0.5559	16.0335	0.17345	16.0333	0.6957	16.0337	0.4384
16.0418	0.06645	16.042	0.2133	16.042	0.56515	16.0418	0.1744	16.0417	0.7341	16.042	0.4438
16.0502	0.06555	16.0503	0.2277	16.0503	0.57185	16.0502	0.17305	16.05	0.77835	16.0503	0.44635
16.0585	0.0649	16.0587	0.2428	16.0587	0.57785	16.0585	0.1741	16.0583	0.8253	16.0587	0.44885
16.0668	0.0666	16.067	0.26385	16.067	0.58635	16.0668	0.1743	16.0667	0.8801	16.067	0.4528
16.0752	0.0679	16.0753	0.28725	16.0753	0.5964	16.0752	0.1738	16.075	0.9405	16.0753	0.45655
16.0835	0.06845	16.0837	0.31285	16.0837	0.60445	16.0835	0.1737	16.0833	1.00015	16.0837	0.46185
16.0918	0.0696	16.092	0.343	16.092	0.61235	16.0918	0.17335	16.0917	1.06435	16.092	0.46625
16.1002	0.07215	16.1003	0.3781	16.1003	0.6252	16.1002	0.17415	16.1	1.13245	16.1003	0.47445
16.1085	0.0742	16.1087	0.41515	16.1087	0.63635	16.1085	0.17395	16.1083	1.20035	16.1087	0.4826
16.1168	0.0773	16.117	0.45705	16.117	0.6524	16.1168	0.1724	16.1167	1.2724	16.117	0.494
16.1252	0.08125	16.1253	0.50155	16.1253	0.67285	16.1252	0.1727	16.125	1.34265	16.1253	0.5067
16.1335	0.08655	16.1337	0.55075	16.1337	0.6966	16.1335	0.1724	16.1333	1.41215	16.1337	0.52295
16.1418	0.09175	16.142	0.6022	16.142	0.72535	16.1418	0.17265	16.1417	1.483	16.142	0.5418
16.1502	0.09925	16.1503	0.6539	16.1503	0.75745	16.1502	0.1716	16.15	1.54755	16.1503	0.5635
16.1585	0.1072	16.1587	0.70805	16.1587	0.79555	16.1585	0.17105	16.1583	1.61095	16.1587	0.59075
16.1668	0.12015	16.167	0.76235	16.167	0.8392	16.1668	0.16855	16.1667	1.6697	16.167	0.6212
16.1752	0.1349	16.1753	0.81735	16.1753	0.8915	16.1752	0.17015	16.175	1.72545	16.1753	0.6597
16.1835	0.1513	16.1837	0.86995	16.1837	0.9438	16.1835	0.1689	16.1833	1.77315	16.1837	0.69855
16.1918	0.1716	16.192	0.91975	16.192	1.0036	16.1918	0.1678	16.1917	1.8159	16.192	0.74835
16.2002	0.1959	16.2003	0.96465	16.2003	1.06535	16.2002	0.1674	16.2	1.85145	16.2003	0.8006
16.2085	0.2234	16.2087	1.0038	16.2087	1.1282	16.2085	0.16625	16.2083	1.8781	16.2087	0.8565
16.2168	0.2544	16.217	1.03715	16.217	1.1929	16.2168	0.1656	16.2167	1.89635	16.217	0.9201
16.2252	0.29205	16.2253	1.06385	16.2253	1.25845	16.2252	0.16505	16.225	1.9061	16.2253	0.9873
16.2335	0.3333	16.2337	1.08395	16.2337	1.32205	16.2335	0.16605	16.2333	1.91085	16.2337	1.0601
16.2418	0.37855	16.242	1.09635	16.242	1.3822	16.2418	0.16485	16.2417	1.9053	16.242	1.1348
16.2502	0.42955	16.2503	1.09925	16.2503	1.4383	16.2502	0.1629	16.25	1.8934	16.2503	1.2128
16.2585	0.48415	16.2587	1.09415	16.2587	1.4906	16.2585	0.1653	16.2583	1.87285	16.2587	1.29305
16.2668	0.5433	16.267	1.0806	16.267	1.536	16.2668	0.16465	16.2667	1.84265	16.267	1.3724
16.2752	0.6074	16.2753	1.0611	16.2753	1.57185	16.2752	0.16515	16.275	1.8071	16.2753	1.4538
16.2835	0.67205	16.2837	1.03275	16.2837	1.60005	16.2835	0.16505	16.2833	1.76295	16.2837	1.5301
16.2918	0.74015	16.292	1.0002	16.292	1.62225	16.2918	0.1647	16.2917	1.71475	16.292	1.60635
16.3002	0.8092	16.3003	0.9636	16.3003	1.6343	16.3002	0.16375	16.3	1.66045	16.3003	1.67685
16.3085	0.87735	16.3087	0.92145	16.3087	1.63485	16.3085	0.1628	16.3083	1.60115	16.3087	1.7445
16.3168	0.9441	16.317	0.8741	16.317	1.62465	16.3168	0.1621	16.3167	1.53695	16.317	1.80245
16.3252	1.0099	16.3253	0.825	16.3253	1.60745	16.3252	0.16435	16.325	1.4716	16.3253	1.85455
16.3335	1.071	16.3337	0.7715	16.3337	1.5799	16.3335	0.16375	16.3333	1.40005	16.3337	1.8968
16.3418	1.1324	16.342	0.72375	16.342	1.54635	16.3418	0.16405	16.3417	1.33315	16.342	1.9339
16.3502	1.18515	16.3503	0.6685	16.3503	1.50095	16.3502	0.16495	16.35	1.26205	16.3503	1.95795
16.3585	1.2339	16.3587	0.619	16.3587	1.4511	16.3585	0.1671	16.3583	1.1931	16.3587	1.9751
16.3668	1.27445	16.367	0.5684	16.367	1.3952	16.3668	0.16705	16.3667	1.12365	16.367	1.9807
16.3752	1.31135	16.3753	0.52245	16.3753	1.336	16.3752	0.16995	16.375	1.0569	16.3753	1.9757
16.3835	1.338	16.3837	0.4772	16.3837	1.27175	16.3835	0.1705	16.3833	0.99315	16.3837	1.96325
16.3918	1.3592	16.392	0.4358	16.392	1.20625	16.3918	0.17065	16.3917	0.93285	16.392	1.94115
16.4002	1.3701	16.4003	0.3973	16.4003	1.13795	16.4002	0.1722	16.4	0.8759	16.4003	1.91035
16.4085	1.3727	16.4087	0.36375	16.4087	1.071	16.4085	0.17465	16.4083	0.82225	16.4087	1.87105
16.4168	1.36835	16.417	0.33095	16.417	1.0055	16.4168	0.176	16.4167	0.77405	16.417	1.82575
16.4252	1.35295	16.4253	0.30015	16.4253	0.9382	16.4252	0.18095	16.425	0.72705	16.4253	1.77245
16.4335	1.3304	16.4337	0.2736	16.4337	0.87235	16.4335	0.18085	16.4333	0.684	16.4337	1.7128
16.4418	1.3011	16.442	0.2506	16.442	0.81205	16.4418	0.1833	16.4417	0.6468	16.442	1.6499
16.4502	1.26705	16.4503	0.2307	16.4503	0.7541	16.4502	0.1839	16.45	0.61495	16.4503	1.5842
16.4585	1.22115	16.4587	0.21095	16.4587	0.69785	16.4585	0.1851	16.4583	0.58275	16.4587	1.5112
16.4668	1.17455	16.467	0.19625	16.467	0.64655	16.4668	0.18715	16.4667	0.55665	16.467	1.4395
16.4752	1.12205	16.4753	0.18255	16.4753	0.6002	16.4752	0.18745	16.475	0.5346	16.4753	1.3684
16.4835	1.06595	16.4837	0.16965	16.4837	0.5546	16.4835	0.1895	16.4833	0.5129	16.4837	1.29435
16.4918	1.00615	16.492	0.15905	16.492	0.51425	16.4918	0.1917	16.4917	0.496	16.492	1.2225
16.5002	0.94465	16.5003	0.1505	16.5003	0.47735	16.5002	0.1927	16.5	0.47945	16.5003	1.1519
16.5085	0.88445	16.5087	0.1446	16.5087	0.4431	16.5085	0.19255	16.5083	0.4652	16.5087	1.0846
16.5168	0.8208	16.517	0.1354	16.517	0.4103	16.5168	0.1955	16.5167	0.4515	16.517	1.0178
16.5252	0.76025	16.5253	0.1278	16.5253	0.38105	16.5252	0.1964	16.525	0.4388	16.5253	0.955
16.5335	0.69975	16.5337	0.12155	16.5337	0.3543	16.5335	0.1948	16.5333	0.42815	16.5337	0.89365
16.5418	0.64405	16.542	0.1182	16.542	0.33365	16.5418	0.1939	16.5417	0.42105	16.542	0.83925
16.5502	0.5883	16.5503	0.1141	16.5503	0.3086	16.5502	0.19385	16.55	0.41315	16.5503	0.7869
16.5585	0.53545	16.5587	0.111	16.5587	0.291	16.5585	0.19445	16.5583	0.406	16.5587	0.73775
16.5668	0.48665	16.567	0.10725	16.567	0.2742	16.5668	0.19385	16.5667	0.3997	16.567	0.69255
16.5752	0.43995	16.5753	0.104	16.5753	0.25725	16.5752	0.1924	16.575	0.3922	16.5753	0.6506
16.5835	0.4005	16.5837	0.10175	16.5837	0.244	16.5835	0.19085	16.5833	0.38725	16.5837	0.613
16.5918	0.3621	16.592	0.0983	16.592	0.23165	16.5918	0.1903	16.5917	0.3825	16.592	0.57875
16.6002	0.32955	16.6003	0.0964	16.6003	0.22055	16.6002	0.19005	16.6	0.37945	16.6003	0.54895
16.6085	0.2976	16.6087	0.09195	16.6087	0.21025	16.6085	0.1942	16.6083	0.3732	16.6087	0.52015
16.6168	0.27155	16.617	0.08985	16.617	0.20045	16.6168	0.19035	16.6167	0.3704	16.617	0.4964
16.6252	0.2473	16.6253	0.088	16.6253	0.19245	16.6252	0.1886	16.625	0.36655	16.6253	0.4759
16.6335	0.2273	16.6337	0.0875	16.6337	0.1876	16.6335	0.18755	16.6333	0.3658	16.6337	0.4557
[truncated: 4,604 more rows]
