# Supplementary material for: A moonlighting function of a chitin polysaccharide monooxygenase, CWR-1, in Neurospora crassa allorecognition
Source: eLife. 2022 Aug 30;11:e80459. doi: 10.7554/eLife.80459 (PMC9550227; doi:10.7554/eLife.80459)
Supplement: Figure 5—source data 3. — The amount of bound copper that was calculated for each construct. The amount of copper was determined using ICP-MS and then divided by the protein concentration to generate a ratio. The protein concentration was determined using the absorbance at 280 nm with a NanoDrop UV-Vis with extinction coefficients predicted by Benchling (all Cys oxidized). The results from the technical triplicates are listed. [file elife-80459-fig5-data3.xlsx]

## Sheet: Sheet1
Copper Equivalents (Cu µM/Protein µM)
Haplogroup
HG1 H20A	0.76	0.54	0.85
HG4 H20A	0.16	0.17	0.16
HG1 H78A	1.99	1.8	1.82
HG4 H79A	0.99	0.89	0.94
HG1 Y159A	1.23	1.34	1.24
HG1 H20A H78A	0.16	0.15	0.15
HG4 H20A H79A	0.23	0.22	0.23
