# Supplementary material for: A moonlighting function of a chitin polysaccharide monooxygenase, CWR-1, in Neurospora crassa allorecognition
Source: eLife. 2022 Aug 30;11:e80459. doi: 10.7554/eLife.80459 (PMC9550227; doi:10.7554/eLife.80459)
Supplement: Figure 5—source data 4. — The slopes from monitoring polysaccharide monooxygenase (PMO)-catalyzed oxygen reduction using an HRP-coupled assay. A PMO sample (2 µM) was incubated at room temperature with 100 µM Amplex red, 1.3 µM HRP (Sigma), 2 mM ascorbate in 50 mM MOPS pH 7.0. The change in absorbance at 540 nm vs. time (min) is listed for each biological replicate in this table. [file elife-80459-fig5-data4.xlsx]

## Sheet: Sheet1
Oxygen Reduction Assay (A540nm*min-1)
Haplogroup
HG1 H20A	0.005	0.006	0.006
HG6 H20A	0.001	0.001	0.001
HG1 H78A	0.057	0.047	0.046
HG6 H79A	0.049	0.056	0.053
HG1 Y159A	0.051	0.054	0.047
HG1 H20A H78A	0.003	0.002	0.002
HG6 H20A H79A	0.009	0.008	0.008
