# Supplementary material for: A moonlighting function of a chitin polysaccharide monooxygenase, CWR-1, in Neurospora crassa allorecognition
Source: eLife. 2022 Aug 30;11:e80459. doi: 10.7554/eLife.80459 (PMC9550227; doi:10.7554/eLife.80459)
Supplement: Figure 5—source data 5. — Fusion test of the different cwr-1HG1 histidine variants and tyrosine variant paired with a strain expressing cwr-2HG3; ΔΔΔ. [file elife-80459-fig5-data5.xlsx]

## Sheet: Figure 5F-source data
Figure 5F-source data.
Fusion test of the different cwr-1HG1 histidine variants and tyrosine variant paired with a strain expressing cwr-2HG3; DDD.
One-way ANOVA summary: F= 90.88, P value 0.0000000041
Tukey’s multiple comparison test	95.00% CI	Summary	P value
DDD vs cwr-1HG1; DDD	65.26 to 93.41	****	3.6e-09
DDD vs cwr-1H20AHG1; DDD	48.59 to 76.74	****	4.72e-08
DDD vs cwr-1H78AHG1; DDD	49.93 to 78.07	****	3.71e-08
DDD vs cwr-1H20AH78AHG1; DDD	49.93 to 78.07	****	3.71e-08
DDD vs cwr-1Y159AHG1; DDD	53.59 to 81.74	****	2e-08
cwr-1HG1; DDD vs cwr-1H20AHG1; DDD	-30.74 to -2.593	*	0.0176035
cwr-1HG1; DDD vs cwr-1H78AHG1; DDD	-29.41 to -1.260	*	0.0301407
cwr-1HG1; DDD vs cwr-1H20AH78AHG1; DDD	-29.41 to -1.260	*	0.0301407
cwr-1HG1; DDD vs cwr-1Y159AHG1; DDD	-25.74 to 2.407	ns	0.12804
cwr-1H20AHG1; DDD vs cwr-1H78AHG1; DDD	-12.74 to 15.41	ns	0.99944
cwr-1H20AHG1; DDD vs cwr-1H20AH78AHG1; DDD	-12.74 to 15.41	ns	0.99944
cwr-1H20AHG1; DDD vs cwr-1Y159AHG1; DDD	-9.074 to 19.07	ns	0.831928
cwr-1H78AHG1; DDD; DDD vs cwr-1H20AH78AHG1; DDD	-14.07 to 14.07	ns	>0.9999999999
cwr-1H78AHG1; DDD; DDD vs cwr-1Y159AHG1; DDD	-10.41 to 17.74	ns	0.945563
cwr-1H20AH78AHG1; DDD vs cwr-1Y159AHG1; DDD	-10.41 to 17.74	ns	0.945563
