# Supplementary material for: A moonlighting function of a chitin polysaccharide monooxygenase, CWR-1, in Neurospora crassa allorecognition
Source: eLife. 2022 Aug 30;11:e80459. doi: 10.7554/eLife.80459 (PMC9550227; doi:10.7554/eLife.80459)
Supplement: Figure 6—source data 1. — Fusion test of the cwr-1HG1LSHG6 chimera paired with a strain expressing cwr-1HG1cwr-2HG1, cwr-2HG1; ΔΔΔ or cwr-2HG6; ΔΔΔ. [file elife-80459-fig6-data1.xlsx]

## Sheet: Figure 6C-source data
Figure 6C-source data.
Fusion test of the cwr-1HG1LSHG6 chimera paired with a strains expressing cwr-1HG1cwr-2HG1, cwr-2HG1; DDD or cwr-2HG6; DDD.
One-way ANOVA summary: F= 191.5, P value 0.0000000871
Tukey’s multiple comparison test	95.00% CI	Summary	P value
DDD vs cwr-1HG1cwr-2HG1	-6.245 to 15.58	ns	0.549432
DDD vs cwr-2HG1; DDD	-10.25 to 11.58	ns	0.997124
DDD vs cwr-2HG6; DDD	57.42 to 79.25	****	1.579e-07
cwr-1HG1cwr-2HG1 vs cwr-2HG1; DDD	-14.91 to 6.912	ns	0.658274
cwr-1HG1cwr-2HG1 vs cwr-2HG6; DDD	52.75 to 74.58	****	3.032e-07
cwr-2HG1; DDD vs cwr-2HG6; DDD	56.75 to 78.58	****	1.73e-07
