# Supplementary material for: A moonlighting function of a chitin polysaccharide monooxygenase, CWR-1, in Neurospora crassa allorecognition
Source: eLife. 2022 Aug 30;11:e80459. doi: 10.7554/eLife.80459 (PMC9550227; doi:10.7554/eLife.80459)
Supplement: Figure 6—source data 2. — Comparison of the fusion test of the cwr-1HG1 or cwr-1HG1LS-L8-LCHG6 chimera paired with strains harboring cwr-2 alleles from six different haplogroups. [file elife-80459-fig6-data2.xlsx]

## Sheet: Figure 6E-source data
Figure 6E-source data.
Comparison of the fusion test of the cwr-1HG1 or cwr-1HG1LS-L8-LCHG6 chimera paired with a strains harboring cwr-2 alleles from six different haplogroups.
Two-way ANOVA summary:
Interaction F= 83.64, P value <0.0001
cwr-2 F=143.81, P value <0.0001
cwr-1HG1; DDD or cwr-1LS-L8-LCHG6 F=13.11, P value <0.001002
Tukey’s multiple comparison test	95.00% CI	Summary	P value
DDD fused with cwr-1HG1; DDD vs DDD fused with cwr-1LS-L8-LCHG6; DDD	-19.119967 to 9.1199673	ns	0.992301
cwr-1HG1cwr-2HG1 fused with cwr-1HG1; DDD vs cwr-1HG1cwr-2HG1 fused with cwr-1LS-L8-LCHG6; DDD	32.546699 to 60.786634	****	<0.000001
cwr-2HG1; DDD fused with cwr-1HG1; DDD vs cwr-2HG1 fused with cwr-1LS-L8-LCHG6; DDD	40.880033 to 69.119967	****	<0.000001
cwr-2HG2; DDD fused with cwr-1HG1; DDD vs cwr-2HG2 fused with cwr-1LS-L8-LCHG6; DDD	-19.453301 to 8.7866339	ns	0.985949
cwr-2HG3; DDD fused with cwr-1HG1; DDD vs cwr-2HG3 fused with cwr-1LS-L8-LCHG6; DDD	-24.119967 to 4.1199673	ns	0.416263
cwr-2HG4; DDD fused with cwr-1HG1; DDD vs cwr-2HG4 fused with cwr-1LS-L8-LCHG6; DDD	-41.786634 to -13.546699	****	3e-06
cwr-2HG5; DDD fused with cwr-1HG1; DDD vs cwr-2HG5 fused with cwr-1LS-L8-LCHG6; DDD	13.546699 to 41.786634	****	3e-06
cwr-2HG6; DDD fused with cwr-1HG1; DDD vs cwr-2HG6 fused with cwr-1LS-L8-LCHG6; DDD	-56.453301 to -28.213366	****	<0.000001
DDD fused with cwr-1LS-L8-LCHG6; DDD vs cwr-1HG1cwr-2HG1 fused with cwr-1LS-L8-LCHG6; DDD	32.546699 to 60.786634	****	<0.000001
DDD fused with cwr-1LS-L8-LCHG6; DDD vs cwr-2HG1 fused with cwr-1LS-L8-LCHG6; DDD	35.546699 to 63.786634	****	<0.000001
DDD fused with cwr-1LS-L8-LCHG6; DDD vs cwr-2HG6 fused with cwr-1LS-L8-LCHG6; DDD	14.880033 to 43.119967	****	1e-06
cwr-1HG1cwr-2HG1 fused with cwr-1LS-L8-LCHG6; DDD vs cwr-2HG6 fused with cwr-1LS-L8-LCHG6; DDD	-31.786634 to -3.5466994	**	0.004667
cwr-2HG1 fused with cwr-1LS-L8-LCHG6; DDD vs cwr-2HG6 fused with cwr-1LS-L8-LCHG6; DDD	-34.786634 to -6.5466994	***	0.000533
