# Supplementary material for: A moonlighting function of a chitin polysaccharide monooxygenase, CWR-1, in Neurospora crassa allorecognition
Source: eLife. 2022 Aug 30;11:e80459. doi: 10.7554/eLife.80459 (PMC9550227; doi:10.7554/eLife.80459)
Supplement: Supplementary file 1. — (a) Plasmids to transform N. crassa. (b) Plasmids to transform E. coli. (c) Primers used in this study. (d) N. crassa strains used in this work. (e) Intra-haplogroup sequence ID. (f) Substrates used to test CWR-1 activity. (g) Sequence similarity network (SSN) data set. [file elife-80459-supp1.xlsx]

## Sheet: Supplementary file 1a
Supplementary file 1a. Plasmids to transform N. crassa.
Plasmids for N. crassa	Source
pMF272	Freitag et al., 2004
pMF272::his-3-Pcwr-1-cwr-1(NCU01380)-Tcwr-1 FGSC2489	This study
pMF272::his-3-Pcwr-1-cwr-1(NCU01380)H20A-Tcwr-1 FGSC2489	This study
pMF272::his-3-Pcwr-1-cwr-1(NCU01380)H78A-Tcwr-1 FGSC2489	This study
pMF272::his-3-Pcwr-1-cwr-1(NCU01380)H20AH78A-Tcwr-1 FGSC2489	This study
pMF272::his-3-Pcwr-1-cwr-1(NCU01380) △GS-Tcwr-1 FGSC2489	This study
pMF272::his-3-Pcwr-1-cwr-1(NCU01380) △GS△X278-Tcwr-1 FGSC2489	This study
pMF272::his-3-Ptef-1-cwr-1 sp pmo NCU01380 D111 + GS X278 NCU01380 FGSC2489-V5-Tccg-1	This study
pMF272::his-3-Ptef-1-cwr-1 sp pmo NCU01380 JW228 + GS X278 NCU01380 FGSC2489-V5-Tccg-1	This study
pMF272::his-3-Ptef-1-cwr-1 sp pmo NCU01380 JW258 + GS X278 NCU01380 FGSC2489-V5-Tccg-1	This study
pMF272::his-3-Ptef-1-cwr-1 sp pmo NCU01380 P4476 + GS X278 NCU01380 FGSC2489-V5-Tccg-1	This study
pMF272::his-3-Ptef-1-cwr-1 sp pmo NCU01380 JW242 +GS X278 NCU01380 FGSC2489-V5-Tccg-1	This study
pMF272::his-3-Ptef-1-cwr-1 NCU01380 D111-V5-Tccg-1	This study
pMF272::his-3-Ptef-1-cwr-1 NCU01380 JW258-V5-Tccg-1	This study
pMF272::his-3-Ptef-1-cwr-1 NCU01380 P4476-V5-Tccg-1	This study
pMF272::his-3-Ptef-1-cwr-1 NCU01380 JW242-V5-Tccg-1	This study
pMF272::his-3-Ptef-1-cwr-1 NCU01380 FGSC2489-V5-Tccg-1	This study
pMF272::his-3-Ptef-1-cwr-2 NCU01382 D111-V5-Tccg-1	This study
pMF272::his-3-Ptef-1-cwr-2 NCU01382 JW258-V5-Tccg-1	This study
pMF272::his-3-Ptef-1-cwr-2 NCU01382 P4476-V5-Tccg-1	This study
pMF272::his-3-Ptef-1-cwr-2 NCU01382 JW242-V5-Tccg-1	This study
pMF272::his-3-Ptef-1-cwr-2 NCU01382 P4471 (FGSC2489)-V5-Tccg-1	This study
pMF272::his-3-Pcwr-1-cwr-1(NCU01380) FGSC2489+JW228 V86-T130–Tcwr-1 FGSC2489	This study
pMF272::his-3-Pcwr-1-cwr-1(NCU01380) FGSC2489+JW228 V86-D202–Tcwr-1 FGSC2489	This study

## Sheet: Supplementary file 1b
Supplementary file 1b. Plasmids to transform E. coli.
Plasmids for E. coli	Source
pET-22b	Novagen, Madison, Wisconsin
pET-22b-Thrombin cut site -6xHis	This study
pET-22b cwr-1 (NCU01380) FGSC2489, starting first histidine H20-V687 + thrombin cut site + 6x His	This study
pET-22b cwr-1 (NCU01380) D111, starting first histidine H20-V690 + thrombin cut site + 6x His	This study
pET-22b cwr-1 (NCU01380) JW258, starting first histidine H20-T690 + thrombin cut site + 6x His	This study
pET-22b cwr-1 (NCU01380) P4476, starting first histidine H20-V687 + thrombin cut site + 6x His	This study
pET-22b cwr-1 (NCU01380) JW242, starting first histidine H20-V687 + thrombin cut site + 6x His	This study
pET-22b cwr-1 (NCU01380) JW228, starting first histidine H20-K690 + thrombin cut site + 6x His	This study
pET-22b cwr-1 (NCU01380) FGSC2489, starting first histidine H20-V687 mutagenesis H20A + thrombin cut site + 6x His	This study
pET-22b cwr-1 (NCU01380) FGSC2489, starting first histidine H20-V687 mutagenesis H78A + thrombin cut site + 6x His	This study
pET-22b cwr-1 (NCU01380) FGSC2489, starting first histidine H20-V687 mutagenesis H20A H78A + thrombin cut site + 6x His	This study
pET-22b cwr-1 (NCU01380) FGSC2489, starting first histidine H20-V687 mutagenesis Y159A + thrombin cut site + 6x His	This study
pET-22b cwr-1 (NCU01380) JW228, starting first histidine H20-K690 mutagenesis H20A + thrombin cut site + 6x His	This study
pET-22b cwr-1 (NCU01380) JW228, starting first histidine H20-K690 mutagenesis H79A + thrombin cut site + 6x His	This study
pET-22b cwr-1 (NCU01380) JW228, starting first histidine H20-K690 mutagenesis H20A H79A + thrombin cut site + 6x His	This study
pET-22b cwr-1 (NCU01380) JW242, starting first histidine H20-V687 mutagenesis H78A + thrombin cut site + 6x His	This study

## Sheet: Supplementary file 1c
Supplementary file 1c. Primers used in this study.
Name	Primers 5’-3’	Purpose
cwr2-JW258-XbaI-F	tgcTCTAGAATGACGGCAAAAGGGTTCATGATGAG	To amplify cwr-2JW258
JW258cwr-2-R-st	ccTTAATTAAGGCCTTCTCCCCATCTTTCCGAAAC	To amplify cwr-2JW258
cwr2-JW242-XbaI-F	tgcTCTAGAATGACGGTGAAGGGATTGATGACGAC	To amplify cwr-2JW242
JW242cwr-2-R-st2	ccTTAATTAATGATTTCTCTTCTTCTTTTCTCTG	To amplify cwr-2JW242
cwr2-P4476-XbaI-F	tgcTCTAGAATGGCAGAGTATACCTTGCAGTCGAC	To amplify cwr-2P4476
P4476cwr-2-R-st	ccTTAATTAATTCTCCGCATCTCTCTCTCTTGTAC	To amplify cwr-2P4476
cwr2-D111-XbaI-F	tgcTCTAGAATGGCAATAAAGGAGCTCATGATGAAAAAAC	To amplify cwr-2D111
D111cwr-2-R-st	ccTTAATTAAAATAAAGGAAACCTGGCTCGGCGAT	To amplify cwr-2D111
X-CWR2-WT-F	tgcTCTAGAATGGCAGTAAAGGAGTTCATGCTGG	To amplify cwr-2P4471
P-CWR2-WT-R	ccTTAATTAACTCCTCCCCCTTCCCCCGAAACC	To amplify cwr-2P4471
cwr1-JW242-XbaI-F	tgcTCTAGAATGTTTTTCACCCAAGCTCTAGTTG	To amplify cwr-1JW242
cwr1-JW258-XbaI-F	tgcTCTAGAATGTTTTTCACGCAAGCTCTTGTGG	To amplify cwr-1JW258
cwr1-P4476-XbaI-F	tgcTCTAGAATGATGCTCACACAACTGCTCTTCG	To amplify cwr-1P4476
CWR1-D111-XbaI-chi1	tgcTCTAGAATGTTCTTCACACAAGCTTTCGTCG	To amplify cwr-1D111
cwr1-ALL-PacI-V5	ccTTAATTAAACCCCTGAAACGAACGGCAAGGCGC	Primer reverse to amplify all the alleles of cwr-1
X-cwr1	tgcTCTAGAATGTTTTTCGCCCAAGCTCTTGTTG	To amplify cwr-1FGSC2489
P-cwr1	ccTTAATTAAACCCCTGAAACGAACGGCAAGGC	To amplify cwr-1FGSC2489
CWR1WT-chi1	TCTGGCGGCGGTTCCGGTGGTGGTTC	To amplify from 230S to 413G cwr-1FGSC2489. For cwr-1 chimeras
CWR1WT-chi1R	ccTTAATTAAACCCCTGAAACGAACGGCAAGGCGC	To amplify from 230S to 413G cwr-1FGSC2489. For cwr-1 chimeras
CWR1D111-WT-R	GAACCACCACCGGAACCGCCGCCAGAGACAGCACTGCACTCAGGAGAAAGTC	To amplify catalytic domain including signal peptide (690 pb) from cwr-1D111. Using primer CWR1-D111-XbaI-chi1. For cwr-1 chimera
CWR1-JW228-XbaI-chi1	tgcTCTAGAATGCACTTCACCAACTTGATTCTGG	To amplify catalytic domain including signal peptide (690 pb) from cwr-1JW228. For cwr-1 chimera
CWR1-JW228-WT-R	GAACCACCACCGGAACCGCCGCCAGACTTGGCGCCACAGCTACCAACAGGC	To amplify catalytic domain including signal peptide (690 pb) from cwr-1JW228. For cwr-1 chimera
CWR1-JW228-chi1-F2	tgcTCTAGAATGCACTTCACCAAC	To amplify catalytic domain including signal peptide (690 pb) from cwr-1JW228. For cwr-1 chimera
jw228-wt-fw-chi1	GCCTGTTGGTAGCTGTGGCGCCAAGTCTGGCGGCGGTTCCGGTGGTGGTT	To amplify catalytic domain including signal peptide (690 pb) from cwr-1JW228. For cwr-1 chimera
690cwr1-jw228REV	CTTGGCGCCACAGCTACCAACAGG	To amplify catalytic domain including signal peptide (690 pb) from cwr-1JW228. For cwr-1 chimera
chi3jw258-wt-F	tgcTCTAGAATGTTTTTCACGCAAGCTCTTGTG	To amplify catalytic domain including signal peptide (690 pb) from cwr-1JW258. For cwr-1 chimera
chi3jw258-wt-R	GAACCACCACCGGAACCGCCGCCAGAGGTTGTCTCGCCGCAATCAGCGAG	To amplify catalytic domain including signal peptide (690 pb) from cwr-1JW258. For cwr-1 chimera
chi3jw258-wt-F2	tgcTCTAGAATGTTTTTCACGCAAG	To amplify catalytic domain including signal peptide (690 pb) from cwr-1JW258. For cwr-1 chimera
chi4P4476-wt-F	tgcTCTAGAATGATGCTCACACAACTGCTCTTCGCTGCTGG	To amplify catalytic domain including signal peptide (687 pb) from cwr-1P4476. For cwr-1 chimera
chi4P4476-wt-F2	tgcTCTAGAATGATGCTCACACAAC	To amplify catalytic domain including signal peptide (687 pb) from cwr-1P4476. For cwr-1 chimera
chi4P4476-wt-R	AACCACCACCGGAACCGCCGCCAGACACATCATTACAACCATCGAGAC	To amplify catalytic domain including signal peptide (687 pb) from cwr-1P4476. For cwr-1 chimera
Chi5 jw242-wt F	tgcTCTAGAATGTTTTTCACCCAAGCTCTAGTTG	To amplify catalytic domain including signal peptide (687 pb) from cwr-1JW242. For cwr-1 chimera
Chi5 jw242-wt F2	tgcTCTAGAATGTTTTTCACCCAAG	To amplify catalytic domain including signal peptide (687 pb) from cwr-1JW242. For cwr-1 chimera
Chi5 jw242-wt R	CACCACCGGAACCGCCGCCAGACACATCATTACAACCCTCGAGACC	To amplify catalytic domain including signal peptide (687 pb) from cwr-1JW242. For cwr-1 chimera
jw228-cwr1-F	ATGCACTTCACCAACTTGATTCTG	To sequence cwr-1JW228
jw228-cwr1-R	TTAACCCCTGAAACGAACGGCAAG	To sequence cwr-1JW228
D111-CWR-2-P1	CCTCTTATAGTACTTTGCCATCAC	To sequence cwr-2D111
D111-CWR-2-P2	GCTATCGGATGATCCTGCAATAG	To sequence cwr-2D111
D111-CWR-2-P3	CTACATCCCTACAATTTTCACGAC	To sequence cwr-2D111
JW242-CWR-2-P1	CAGATACACCCGCGACATACC	To sequence cwr-2JW242
JW242-CWR-2-P2	GCTGTATACTTCTATGAGGACTAC	To sequence cwr-2JW242
JW242-CWR-2-P3	CACTATCCTATAACATTCAACG	To sequence cwr-2JW242
P4476-CWR-2-P1	GCTTTACATCGGTTATCATGGAG	To sequence cwr-2P4476
P4476-CWR-2-P2	GACTAGACAACGCTCAAAGTG	To sequence cwr-2P4476
P4476-CWR-2-P3	GGACACAGTTGAGAGGTTTTG	To sequence cwr-2P4476
JW258-CWR-2-P1	GAGCTACACATTCGATAATGACC	To sequence cwr-2JW258
JW258-CWR-2-P2	GTGGAGGATTGTAGTGATGAC	To sequence cwr-2JW258
JW258-CWR-2-P3	CTCATTATACCTTCCTGCCAGT	To sequence cwr-2JW258
P1-CWR2-WT	CTAATATTACAATGGTGGCTCATTC	To sequence cwr-2FGSC2489
P2-CWR2-WT	GATTTCTACAATGTCACAACGCTTG	To sequence cwr-2FGSC2489
P3-CWR2-WT	GACCAGATTATTCTGCATCTTGCAG	To sequence cwr-2FGSC2489
P4-CWR2-WT	CGGACATATTTTGGCGTATTCAAG	To sequence cwr-2FGSC2489
intHIS MRp12F	ATAATGAACGGAAGGTAGTTGTAGAAAG	Primer to assess integration of the construction at his locus together with primer Ptef-RevComp
Ptef-RevComp	GCTGAGTTGTGAAGCACCAGTTTG	Primer reverse localized at the Ptef-1 to corroborate the integration of the construction at His locus
His-F	CAAACTTGATTGACAGCGAACG	Amplify cassette flanked by histidine arms in PMF272
His-R	TGAGCACATGAGCAAGAGCAAC	Amplify cassette flanked by histidine arms in PMF272
2489-PTH-F	ctgcccagccggcgatggccCACATGCTCATGAACACACC	To amplify catalytic domain PMO starting with the first histidine (H20) from cwr-1FGSC2489 to clone in pET-22b -Thrombin cut site -6xHis
2489-PTH-R2	tggctgccgcgcggcaccagAACAGCATTGCACTCAGGAG	To amplify catalytic domain PMO starting with the first histidine (H20) from cwr-1FGSC2489 to clone in pET-22b -Thrombin cut site -6xHis
PTH-2489R	GGTGTGTTCATGAGCATGTGggccatcgccggctgggcag	To amplify the backbone of pET-22b -Thrombin cut site -6xHis to clone the catalytic domain PMO from cwr-1FGSC2489
PTH-2489F2	CTCCTGAGTGCAATGCTGTTctggtgccgcgcggcagcca	To amplify the backbone of pET-22b -Thrombin cut site -6xHis to clone the catalytic domain PMO from cwr-1FGSC2489
cwr1-tromF	ctgcccagccggcgatggccCACATGCTCATGAACACACCC	To amplify cwr-1FGSC2489 (without signal peptide) to clone in pET-22b -Thrombin cut site -6xHis
cwr1-tromR	tggctgccgcgcggcaccagACCCCTGAAACGAACGGCAA	To amplify cwr-1FGSC2489 (without signal peptide) to clone in pET-22b -Thrombin cut site -6xHis
trom-cwr1F	TTGCCGTTCGTTTCAGGGGTctggtgccgcgcggcagcca	To amplify the backbone of pET-22b -Thrombin cut site -6xHis to clone cwr-1FGSC2489 (without signal peptide)
trom-cwr1R	GGTGTGTTCATGAGCATGTGggccatcgccggctgggcag	To amplify the backbone of pET-22b -Thrombin cut site -6xHis to clone cwr-1FGSC2489 (without signal peptide)
D111-PTH-F	ctgcccagccggcgatggccCATATGCTCATGAACACACCC	To amplify catalytic domain PMO from cwr-1D111 to clone in pET-22b -Thrombin cut site -6xHis
D111-PTHR2	tggctgccgcgcggcaccagGACAGCACTGCACTCAGGAG	To amplify catalytic domain PMO from cwr-1D111 to clone in pET-22b -Thrombin cut site -6xHis
PTH-D111R	GGTGTGTTCATGAGCATATGggccatcgccggctgggcag	To amplify the backbone of pET-22b -Thrombin cut site -6xHis to clone the catalytic domain PMO from cwr-1D111
PTH-D111F2	CTCCTGAGTGCAGTGCTGTCctggtgccgcgcggcagcca	To amplify the backbone of pET-22b -Thrombin cut site -6xHis to clone the catalytic domain PMO from cwr-1D111
JW228-PTH-F	ctgcccagccggcgatggccCACATGCTCATGGCACAACC	To amplify catalytic domain PMO starting with the first histidine (H20) from cwr-1JW228 to clone in pET-22b -Thrombin cut site -6xHis
jw228-PTH-R2	tggctgccgcgcggcaccagCTTGGCGCCACAGCTACCAA	To amplify catalytic domain PMO starting with the first histidine (H20) from cwr-1JW228 to clone in pET-22b -Thrombin cut site -6xHis
PTH-jw228R	GGTTGTGCCATGAGCATGTGggccatcgccggctgggcag	Primer to amplify the backbone of pET-22b -Thrombin cut site -6xHis to clone catalytic domain PMO starting with the first histidine (H20) from cwr-1JW228
PTH-jw228F2	TTGGTAGCTGTGGCGCCAAGctggtgccgcgcggcagcca	Primer to amplify the backbone of pET-22b -Thrombin cut site -6xHis to clone catalytic domain PMO starting with the first histidine (H20) from cwr-1JW228
JW242-PTH-F	ctgcccagccggcgatggccCACATGTTGATGAACACTCC	To amplify catalytic domain PMO starting with the first histidine (H20) from cwr-1JW242 to clone in pET-22b -Thrombin cut site -6xHis
jw242-PTH-R2	tggctgccgcgcggcaccagCACATCATTACAACCCTCGA	To amplify catalytic domain PMO starting with the first histidine (H20) from cwr-1JW242 to clone in pET-22b -Thrombin cut site -6xHis
PTH-jw242R	GGAGTGTTCATCAACATGTGggccatcgccggctgggcag	Primer to amplify the backbone of pET-22b -Thrombin cut site -6xHis to clone catalytic domain PMO starting with the first histidine (H20) from cwr-1JW242
PTH-jw242F2	TCGAGGGTTGTAATGATGTGctggtgccgcgcggcagcca	Primer to amplify the backbone of pET-22b -Thrombin cut site -6xHis to clone catalytic domain PMO starting with the first histidine (H20) from cwr-1JW242
JW258-PTH-F	ctgcccagccggcgatggccCACATGTTGATGAACACCCCC	To amplify catalytic domain PMO starting with the first histidine (H20) from cwr-1JW258 to clone in pET-22b -Thrombin cut site -6xHis
JW258-PTH-R2	tggctgccgcgcggcaccagGGTTGTCTCGCCGCAATCAG	To amplify catalytic domain PMO starting with the first histidine (H20) from cwr-1JW258 to clone in pET-22b -Thrombin cut site -6xHis
PTH-JW258R	GGGGTGTTCATCAACATGTGggccatcgccggctgggcag	Primer to amplify the backbone of pET-22b -Thrombin cut site -6xHis to clone catalytic domain PMO starting with the first histidine (H20) from cwr-1JW258
PTH-JW258F2	CTGATTGCGGCGAGACAACCctggtgccgcgcggcagcca	Primer to amplify the backbone of pET-22b -Thrombin cut site -6xHis to clone catalytic domain PMO starting with the first histidine (H20) from cwr-1JW258
P4476-PTH-F	ctgcccagccggcgatggccCATATGCTGATGAACACTCC	To amplify catalytic domain PMO starting with the first histidine (H20) from cwr-1P4476 to clone in pET-22b -Thrombin cut site -6xHis
4476-PTHR2	tggctgccgcgcggcaccagCACATCATTACAACCATCGAG	To amplify catalytic domain PMO starting with the first histidine (H20) from cwr-1P4476 to clone in pET-22b -Thrombin cut site -6xHis
PTH-P4476R	GGAGTGTTCATCAGCATATGggccatcgccggctgggcag	Primer to amplify the backbone of pET-22b -Thrombin cut site -6xHis to clone catalytic domain PMO starting with the first histidine (H20) from cwr-1P4476
PTH-4476F2	TCGATGGTTGTAATGATGTGctggtgccgcgcggcagcca	Primer to amplify the backbone of pET-22b -Thrombin cut site -6xHis to clone catalytic domain PMO starting with the first histidine (H20) from cwr-1P4476
jw228-H79A-F	ATCCGCTGTGgctGGTGGTGGATCTTG	Primer for mutagenesis of histidine 79 to alanine in cwr-1JW228
jw228-H79A-R	CCGGTGAAAGCCAGAGGC	Primer for mutagenesis of histidine 79 to alanine in cwr-1JW228
jw242-H79A-F	CTCGGCAGTCgccGGGGGAGGCTC	Primer for mutagenesis of histidine 79 to alanine in cwr-1JW242
jw242-H79A-R	CCAGTGAAGGCCAAGGGC	Primer for mutagenesis of histidine 79 to alanine in cwr-1JW242
P4476-H79A-F	TTCCGCTGTGgctGGTGGAGGCT	Primer for mutagenesis of histidine 79 to alanine in cwr-1P4476
P4476-H79A-R	CCAGTGAAAAGCAGAGGTTG	Primer for mutagenesis of histidine 79 to alanine in cwr-1P4476
D111-H79A-F	TTCAGCAGTTgctGGAGGCGGCTC	Primer for mutagenesis of histidine 79 to alanine in cwr-1D111
D111-H79A-R	CCGGTGAAAGCCAGACTC	Primer for mutagenesis of histidine 79 to alanine in cwr-1D111
JW258-H79A-F	GTCTGCTGTTgctGGAGGAGGCTC	Primer for mutagenesis of histidine 79 to alanine in cwr-1JW258
JW258-H79A-R	CCGGTAAAAGCCAGGCTC	Primer for mutagenesis of histidine 79 to alanine in cwr-1JW258
H20A-F	TTCGCAAGCAgctATGCTCATGAACACACCCAAG	Primer for mutagenesis of histidine 20 to alanine in cwr-1FGCS2489
H20A-R	AGCACAGCAAAGCCGCTG	Primer for mutagenesis of histidine 20 to alanine in cwr-1FGCS2489
H78A-F	GTCGGCTGTTgctGGAGGAGGCTCCTG	Primer for mutagenesis of histidine 78 to alanine in cwr-1FGCS2489
H78A-R	CCGGTGAAGGCGAGGCTC	Primer for mutagenesis of histidine 78 to alanine in cwr-1FGCS2489
A78H-F	GTCGGCTGTTcacGGAGGAGGCTCC	Primer for mutagenesis of alanine 78 to histidine in the plasmid that has the construct Pcwr-1-cwr-1FGCS2489 H20A H78A-Tcwr-1
A78H-R	CCGGTGAAGGCGAGGCTC	Primer for mutagenesis of alanine 78 to histidine in the plasmid that has the construct Pcwr-1-cwr-1FGCS2489 H20A H78A-Tcwr-1
Ped_chim13A_R	ctggcaggagcctcctccgt	Primer to amplify the backbone of pMF272::his-3-Pcwr-1-cwr-1(NCU01380)-Tcwr-1 FGSC2489 to clone V86-T130 from cwr-1 JW228
Ped_chim13C_F	CGTCCGACCCTTACACCtattcgttccctatccctga	Primer to amplify the backbone of pMF272::his-3-Pcwr-1-cwr-1(NCU01380)-Tcwr-1 FGSC2489 to clone V86-T130 from cwr-1 JW228
Ped_chim13B_F	aggaggctcctgccagGTCTCCATCACTTACGAT	Primer to amplify V86-T130 from cwr-1 JW228
Ped_chim13B_R	GGTGTAAGGGTCGGACGCG	Primer to amplify V86-T130 from cwr-1 JW228
Ped_chim2_A_aR	AGAAACAGCATTGCACTCAG	To amplify Pcwr-1-cwr-1(NCU01380) △GS-Tcwr-1 FGSC2489 by fusion PCR
Ped_chim2_B_bF	tcctgagtgcaatgctgtttctGCTTGCAGCACTGATGGC	To amplify Pcwr-1-cwr-1(NCU01380) △GS-Tcwr-1 FGSC2489 by fusion PCR
Ped_chim2_anested_NotI	ATAgcggccgcACTGATTCATGCGGTAAA	To amplify Pcwr-1-cwr-1(NCU01380) △GS-Tcwr-1 FGSC2489 by fusion PCR
Ped_chim2_bnested_EcoRI	CGCgaattcCTTTTTCAGGGCCACCATC	To amplify Pcwr-1-cwr-1(NCU01380) △GS-Tcwr-1 FGSC2489 by fusion PCR
P-3loopF2	TACAGGTACCCCAACCCTG	Primer to amplify the backbone of pMF272::his-3-Pcwr-1-cwr-1(NCU01380)-Tcwr-1 FGSC2489 to clone V86-D202 from cwr-1 JW228
P-3loopR2	CTGGCAGGAGCCTCCTCC	Primer to amplify the backbone of pMF272::his-3-Pcwr-1-cwr-1(NCU01380)-Tcwr-1 FGSC2489 to clone V86-D202 from cwr-1 JW228
3loopF2	acggaggaggctcctgccagGTCTCCATCACTTACGATAC	Primer to amplify V86-D202 from cwr-1 JW228
3loopR2	ccagggttggggtacctgtaGTCTTTGCCTTCAAGTCC	Primer to amplify V86-D202 from cwr-1 JW228
Del-pmoF	TAAAGCGTCAAACTCCAAC	To amplify pMF272::his-3-Pcwr-1-cwr-1(NCU01380) △GS△X278-Tcwr-1 FGSC2489
Del-pmoR	AACAGCATTGCACTCAGG	To amplify pMF272::his-3-Pcwr-1-cwr-1(NCU01380) △GS△X278-Tcwr-1 FGSC2489
HIS-3-F ad	CGTCCCTCTCGAGTCCCGTTATTGC	To sequence pMF272::his-3-Pcwr-1-cwr-1(NCU01380)-Tcwr-1 FGSC2489
P1-cwr1-wt	CCTAAGAGGCTTCAACTTTTCCTG	To sequence pMF272::his-3-Pcwr-1-cwr-1(NCU01380)-Tcwr-1 FGSC2489
P2-cwr1-wt	CCTATCCCTGACAACATTCCCAC	To sequence pMF272::his-3-Pcwr-1-cwr-1(NCU01380)-Tcwr-1 FGSC2489
p1R cwr1-2489	GCAAAAAGGAGACATAACAACGAC	To sequence pMF272::his-3-Pcwr-1-cwr-1(NCU01380)-Tcwr-1 FGSC2489
p2F cwr1-2489	GTGTTTTCAGTTCCGACATCTGAC	To sequence pMF272::his-3-Pcwr-1-cwr-1(NCU01380)-Tcwr-1 FGSC2489

## Sheet: Supplementary file 1d
Supplementary file 1d. Strains used in this work.
Name	Genotype	Source
FGSC2489	Wild type; mat A	FGSC
FGSC9716	his-3- ; mat a	FGSC
FGSC6103	his-3- ; mat A	FGSC
D111	Wild isolate; mat A	Gonçalves et al., 2019; Heller et al., 2016; McCluskey et al., 2010; Palma-Guerrero et al., 2013.
JW228	Wild isolate	Gonçalves et al., 2019; Heller et al., 2016; McCluskey et al., 2010; Palma-Guerrero et al., 2013.
JW242	Wild isolate	Gonçalves et al., 2019; Heller et al., 2016; McCluskey et al., 2010; Palma-Guerrero et al., 2013.
JW258	Wild isolate; mat A	Gonçalves et al., 2019; Heller et al., 2016; McCluskey et al., 2010; Palma-Guerrero et al., 2013.
P4476	Wild isolate; mat a	Gonçalves et al., 2019; Heller et al., 2016; McCluskey et al., 2010; Palma-Guerrero et al., 2013.
P4471	Wild isolate; mat a	Gonçalves et al., 2019; Heller et al., 2016; McCluskey et al., 2010; Palma-Guerrero et al., 2013.
FGSC2489; GFP	FGSC2489; his-3-Pccg-1-gfp; mat A	Gonçalves et al., 2019
△△△	△NCU01380△NCU01381△NCU01382::hph; mat a	Gonçalves et al., 2019
△△△; his-3-	△NCU01380△NCU01381△NCU01382::hph; his-3-; mat A	Gonçalves et al., 2019
△△△; gfp	△NCU01380△NCU01381△NCU01382::hph; his-3-Pccg-1::gfp; mat A	Gonçalves et al., 2019
FGSC2489; gfp; his-3-	FGSC2489;csr-1::Pccg-1::gfp; his-3- mat a	Gonçalves et al., 2019
△△△; Pcwr-1-cwr-1-Tcwr-1; gfp	△NCU01380△NCU01381△NCU01382::hph; his-3::Pcwr-1-cwr-1(NCU01380)–Tcwr-1; csr-1::Pccg-1::gfp; mat A	Gonçalves et al., 2019
△△△; Pcwr-1-cwr-1H20A-Tcwr-1; gfp	△NCU01380△NCU01381△NCU01382::hph; his-3::Pcwr-1-cwr-1H20A (NCU01380)–Tcwr-1; csr-1::Pccg-1::gfp; mat A	This study FGSC #27113
△△△; Pcwr-1-cwr-1H78A-Tcwr-1; gfp	△NCU01380△NCU01381△NCU01382::hph; his-3::Pcwr-1-cwr-1H78A (NCU01380)–Tcwr-1; csr-1::Pccg-1::gfp; mat A	This study FGSC #27114
△△△; Pcwr-1-cwr-1H20AH78A-Tcwr-1; gfp	△NCU01380△NCU01381△NCU01382::hph; his-3::Pcwr-1-cwr-1H20AH78A (NCU01380)–Tcwr-1; csr-1::Pccg-1::gfp; mat A	This study FGSC #27115
△△△; Pcwr-1-cwr-1Y159A-Tcwr-1; gfp	△NCU01380△NCU01381△NCU01382::hph; his-3::Pcwr-1-cwr-1Y159A(NCU01380)–Tcwr-1; csr-1::Pccg-1::gfp; mat A	Gonçalves et al., 2019
△△△; Pcwr-1-cwr-1 △gs-Tcwr-1; gfp	△NCU01380△NCU01381△NCU01382::hph; his-3::Pcwr-1- cwr-1△g/s-Tcwr-1; csr-1::Pccg-1::gfp; mat A	This study FGSC #27116
△△△; Pcwr-1-cwr-△gs△X278-Tcwr-1; gfp	△NCU01380△NCU01381△NCU01382::hph; his-3::Pcwr-1-cwr-1△gs△x278-Tcwr-1; csr-1::Pccg-1::gfp; mat A	This study FGSC #27117
Chimera cwr-1 D111	△NCU01380△NCU01381△NCU01382::hph; his-3-Ptef-1-cwr-1 sp pmoD111 + gs x278 FGSC2489-V5-Tccg-1; csr-1-Pccg-1-gfp; mat A	This study FGSC #27118
Chimera cwr-1 JW228	△NCU01380△NCU01381△NCU01382::hph; his-3-Ptef-1-cwr-1 sp pmoJW228 + gs x278 FGSC2489-V5-Tccg-1; csr-1-Pccg-1-gfp; mat A	This study FGSC #27119
Chimera cwr-1 JW258	△NCU01380△NCU01381△NCU01382::hph; his-3-Ptef-1-cwr-1 sp pmoJW258 + gs x278FGSC2489-V5-Tccg-1; csr-1-Pccg-1-gfp; mat A	This study FGSC #27120
Chimera cwr-1 P4476	△NCU01380△NCU01381△NCU01382::hph; his-3-Ptef-1-cwr-1 sp pmoP4476 + gs x278 FGSC2489-V5-Tccg-1; csr-1-Pccg-1-gfp; mat A	This study FGSC #27121
Chimera cwr-1 JW242	△NCU01380△NCU01381△NCU01382::hph; his-3-Ptef-1-cwr-1 sp pmoJW242 + gs x278 FGSC2489-V5-Tccg-1; csr-1-Pccg-1-gfp; mat A	This study FGSC #27122
△△△; Ptef-1-cwr-1D111-Tccg-1; gfp	△NCU01380△NCU01381△NCU01382::hph; his-3-Ptef-1-cwr-1(NCU01380)D111-V5-Tccg-1; csr-1-Pccg-1-gfp; mat A	This study FGSC #27123
△△△; Ptef-1-cwr-1JW242-Tccg-1; gfp	△NCU01380△NCU01381△NCU01382::hph; his-3-Ptef-1-cwr-1(NCU01380)JW242-V5-Tccg-1; csr-1-Pccg-1-gfp; mat A	This study FGSC #27124
△△△; Ptef-1-cwr-1P4476-Tccg-1; gfp	△NCU01380△NCU01381△NCU01382::hph; his-3-Ptef-1-cwr-1(NCU01380)P4476-V5-Tccg-1; csr-1-Pccg-1-gfp; mat A	This study FGSC #27125
△△△; Ptef-1-cwr-1JW258-Tccg-1; gfp	△NCU01380△NCU01381△NCU01382::hph; his-3-Ptef-1-cwr-1(NCU01380)JW258-V5-Tccg-1; csr-1-Pccg-1-gfp; mat A	This study FGSC #27126
△△△; Ptef-1-cwr-1FGSC2489-Tccg-1; gfp	△NCU01380△NCU01381△NCU01382::hph; his-3-Ptef-1-cwr-1(NCU01380)FGSC2489-V5-Tccg-1; csr-1-Pccg-1-gfp; mat A	This study FGSC #27127
△△△; Ptef-1-cwr-1-Tcwr-1 JW228; gfp	△NCU01380△NCU01381△NCU01382::hph; his-3-Ptef-1-cwr-1(NCU01380)-Tcwr-1JW228; csr-1-Pccg-1-gfp; mat A	Gonçalves et al., 2019
△△△; Ptef-1-cwr-2D111-Tccg-1	△NCU01380△NCU01381△NCU01382::hph; his-3-Ptef-1-cwr-2(NCU01382)D111-V5-Tccg-1; mat A	This study FGSC #27128
△△△; Ptef-1-cwr-2JW242-Tccg-1	△NCU01380△NCU01381△NCU01382::hph; his-3-Ptef-1-cwr-2(NCU01382)JW242-V5-Tccg-1; mat a	This study FGSC #27129
△△△; Ptef-1-cwr-2JW258-Tccg-1	△NCU01380△NCU01381△NCU01382::hph; his-3-Ptef-1-cwr-2(NCU01382)JW258-V5-Tccg-1; mat A	This study FGSC #27130
△△△; Ptef-1-cwr-2P4476-Tccg-1	△NCU01380△NCU01381△NCU01382::hph; his-3-Ptef-1-cwr-2(NCU01382)P4476-V5-Tccg-1; mat a	This study FGSC #27131
△△△; Ptef-1-cwr-2P4471 (FGSC2489)-Tccg-1	△NCU01380△NCU01381△NCU01382::hph; his-3-Ptef-1-cwr-2(NCU01382)P4471 (FGSC2489)-V5-Tccg-1; mat A	This study FGSC #27132
△△△; Ptef-1-cwr-2-Tcwr-2 JW228	△NCU01380△NCU01381△NCU01382::hph; his-3-Ptef-1-cwr-2(NCU01382)-Tcwr-2JW228; mat A	Gonçalves et al., 2019
△△△; Pcwr-1-cwr-12489+JW228loopV86-T130	∆1380∆1381∆1382::hph; his-3-Pcwr-1-cwr-12489+JW228 V86-T130-Tcwr-1; csr-1::Pccg-1-gfp; mat A	This study FGSC #27133
△△△; Pcwr-1-cwr-12489+JW228loopsV86-D202	∆1380∆1381∆1382::hph; his-3-Pcwr-1-cwr-12489+JW228 V86-D202-Tcwr-1; csr-1::Pccg-1-gfp; mat A	This study FGSC #27134
FGSC2489; cwr-1D111 HG-5	FGSC2489; csr-1::Pcwr-1-cwr-1D111 HG-5-Tgpd-1; mat A	Gonçalves et al., 2019
∆NCU01380	∆NCU01380::hph; mat a	FGSC
FGSC: Fungal Genetics Stock Center

## Sheet: Supplementary file 1e
Supplementary file 1e. Intrahaplogroup sequence ID.
	# Members	Lower limit of % ID
HG1	5	1
HG2	2	99.4
HG3	5	>98.5%
HG4	2	99.8
HG5	6	>99.8%
HG6	6	>99.8%

## Sheet: Supplementary file 1f
Supplementary file 1f. Substrates used to test CWR-1 activity.
Substrate Tested	Source	Oxidized Peaks from Substrate
α-chitin	Sigma Aldrich (Shrimp Shells) (St. Louis, Missouri)	yes
β-chitin	Mahtani Chitosan Pvt. LTD. Veraval India	yes
N. crassa cell wall	This study	yes
β-Glucan	Megazyme (Yeast) (Wicklow, Ireland)	no
β-Glucan (Mixed Linkage Glucan)	Megazyme (Barley)(Wicklow, Ireland)	no
Pachyman	Megazyme(Wicklow, Ireland)	no
PASC	Prepared as previously described (Wood., 1988)	no
Lichenan (Mixed Linkage Glucan)	Megazyme(Wicklow, Ireland)	no
Amylose	Sigma Aldrich (Potato) (St. Louis, Missouri)	no
Xylan	Megazyme(Wicklow, Ireland)	no
Xyloglucan	Megazyme(Wicklow, Ireland)	no
Galactomannan	Megazyme(Wicklow, Ireland)	no
Glucomannan	Megazyme(Wicklow, Ireland)	no

## Sheet: Supplementary file 1g
Supplementary file 1g. SSN data set.
Cluster Number	Cluster Sequence Count	Description	ENA Database Genome ID	Gene Name	Name	NCBI IDs	node.fill Color	Organism	Query IDs	Sequence Length	Shared name	Species
1	664	Extracellular protein	DS990640	HCEG_06941	F0UP74	GI:325094416|EMBL-CDS:EGC47726.1	#FF0000	Ajellomyces capsulatus (strain H88)	F0UP74	344	F0UP74	Histoplasma capsulatum H88
1	664	Uncharacterized protein	ABDF02000082	TRIVIDRAFT_155830	G9N0H2	GI:358382181|GI:927416440|EMBL-CDS:EHK19854.1|REFSEQ:XP_013954051.1	#FF0000	Hypocrea virens (strain Gv29-8 / FGSC 10586)	G9N0H2	380	G9N0H2	Trichoderma virens Gv29-8
1	664	Uncharacterized protein	GL573206	GMDG_02632	L8G482	GI:440637665|GI:831342379|EMBL-CDS:ELR07584.1|REFSEQ:XP_012741040.1	#FF0000	Pseudogymnoascus destructans (strain ATCC MYA-4855 / 20631-21)	L8G482	420	L8G482	Pseudogymnoascus destructans 20631-21
1	664	Uncharacterized protein	JPJS01001308	V490_04715	A0A093Y411	GI:682269102|EMBL-CDS:KFX93724.1	#FF0000	Pseudogymnoascus sp. VKM F-3557.	A0A093Y411	217	A0A093Y411	Pseudogymnoascus sp. VKM F-3557
1	664	Uncharacterized protein	JPJT01002146	V491_03729	A0A093ZTK9	GI:682314259|EMBL-CDS:KFY20424.1	#FF0000	Pseudogymnoascus sp. VKM F-3775.	A0A093ZTK9	218	A0A093ZTK9	Pseudogymnoascus sp. VKM F-3775
1	664	Uncharacterized protein	JPJZ01000502	V497_02057	A0A094DA99	GI:682379896|EMBL-CDS:KFY63336.1	#FF0000	Pseudogymnoascus sp. VKM F-4516	A0A094DA99	217	A0A094DA99	Pseudogymnoascus sp. VKM F-4516 (FW-969)
1	664	Uncharacterized protein	JPJY01000684	V496_04210	A0A094FU22	GI:682379535|EMBL-CDS:KFY63087.1	#FF0000	Pseudogymnoascus sp. VKM F-4515	A0A094FU22	548	A0A094FU22	Pseudogymnoascus sp. VKM F-4515 (FW-2607)
1	664	Uncharacterized protein	JPKA01005568	V498_10453	A0A094GC91	GI:682388157|EMBL-CDS:KFY69532.1	#FF0000	Pseudogymnoascus sp. VKM F-4517	A0A094GC91	446	A0A094GC91	Pseudogymnoascus sp. VKM F-4517 (FW-2822)
1	664	Uncharacterized protein	JOKZ01000046	THAR02_02344	A0A0G0A016	GI:818166046|EMBL-CDS:KKP05527.1	#FF0000	Trichoderma harzianum	A0A0G0A016	431	A0A0G0A016	Trichoderma harzianum
1	664	Spore coat protein sp96	JXCE01000494	FLAG1_10179	A0A0N0V5F6	GI:927752936|EMBL-CDS:KPA37024.1	#FF0000	Fusarium langsethiae.	A0A0N0V5F6	343	A0A0N0V5F6	Fusarium langsethiae
1	664	Uncharacterized protein	AZHA01000002	BBO_00967	A0A162M585	GI:1025663569|EMBL-CDS:OAA51020.1	#FF0000	Cordyceps brongniartii RCEF 3172.	A0A162M585	231	A0A162M585	Cordyceps brongniartii RCEF 3172
1	664	Uncharacterized protein	CP017815	sscle_02g014090	A0A1D9PVK7	GI:156058109|GI:1095449676|EMBL-CDS:APA06639.1|REFSEQ:XP_001594978.1	#FF0000	Sclerotinia sclerotiorum (strain ATCC 18683 / 1980 / Ss-1)	A0A1D9PVK7	399	A0A1D9PVK7	Sclerotinia sclerotiorum 1980 UF-70
1	664	Uncharacterized protein	LVVK01000020	A0O28_0012850	A0A1T3CB08	GI:1153486145|EMBL-CDS:OPB38181.1	#FF0000	Trichoderma guizhouense.	A0A1T3CB08	234	A0A1T3CB08	Trichoderma guizhouense
1	664	Uncharacterized protein	NJEU01000180	CDD82_2291	A0A2C5ZJL7	EMBL-CDS:PHH79614.1	#FF0000	Ophiocordyceps australis.	A0A2C5ZJL7	403	A0A2C5ZJL7	Ophiocordyceps australis
1	664	Uncharacterized protein	MTYI01000111	THARTR1_07439	A0A2K0U399	EMBL-CDS:PNP52230.1	#FF0000	Trichoderma harzianum	A0A2K0U399	235	A0A2K0U399	Trichoderma harzianum
1	664	Endoglucanase| putative	DS027050	ACLA_060790	A1CC63	GI:121711862|GI:119401698|EMBL-CDS:EAW12120.1|REFSEQ:XP_001273546.1	#FF0000	Aspergillus clavatus (strain ATCC 1007 / CBS 513.65 / DSM 816 /NCTC 3887 / NRRL 1)	A1CC63	215	A1CC63	Aspergillus clavatus NRRL 1
1	664	Uncharacterized protein	CH476625	SS1G_04786	A7EHJ4	GI:156058109|GI:154702571|EMBL-CDS:EDO02310.1|REFSEQ:XP_001594978.1	#FF0000	Sclerotinia sclerotiorum (strain ATCC 18683 / 1980 / Ss-1)	A7EHJ4	399	A7EHJ4	Sclerotinia sclerotiorum 1980 UF-70
1	664	Uncharacterized protein	KN305540	PABG_05906	C0SDV5	GI:225677535|EMBL-CDS:EEH15819.1	#FF0000	Paracoccidioides brasiliensis (strain Pb03)	C0SDV5	368	C0SDV5	Paracoccidioides brasiliensis Pb03
1	664	Uncharacterized protein	ACYE01000205	TRV_04037	D4DA91	GI:302660360|GI:291185778|EMBL-CDS:EFE41242.1|REFSEQ:XP_003021860.1	#FF0000	Trichophyton verrucosum (strain HKI 0517)	D4DA91	218	D4DA91	Trichophyton verrucosum HKI 0517
1	664	Uncharacterized protein	DS989824	MGYG_04403	E4USU7	GI:311342193|GI:315049703|EMBL-CDS:EFR01396.1|REFSEQ:XP_003174226.1	#FF0000	Arthroderma gypseum (strain ATCC MYA-4604 / CBS 118893)	E4USU7	220	E4USU7	Nannizzia gypsea CBS 118893
1	664	Endoglucanase	GG698478	TESG_00731	F2RPC2	GI:326469169|EMBL-CDS:EGD93178.1	#FF0000	Trichophyton tonsurans (strain CBS 112818)	F2RPC2	218	F2RPC2	Trichophyton tonsurans CBS 112818
1	664	Uncharacterized protein	ABDF02000072	TRIVIDRAFT_216235	G9MW31	GI:358383664|GI:927419384|EMBL-CDS:EHK21327.1|REFSEQ:XP_013955523.1	#FF0000	Hypocrea virens (strain Gv29-8 / FGSC 10586)	G9MW31	235	G9MW31	Trichoderma virens Gv29-8
1	664	C6 transcription factor	KB020674	CGGC5_6990	L2G2U8	GI:596676138|GI:429858154|EMBL-CDS:ELA32984.1|REFSEQ:XP_007277951.1	#FF0000	Colletotrichum gloeosporioides (strain Nara gc5)	L2G2U8	1008	L2G2U8	Colletotrichum gloeosporioides Nara gc5
1	664	Uncharacterized protein	AMYD01000192	CGLO_00836	T0KTG8	GI:530479725|EMBL-CDS:EQB58862.1	#FF0000	Colletotrichum gloeosporioides (strain Cg-14)	T0KTG8	1017	T0KTG8	Colletotrichum gloeosporioides Cg-14
1	664	Uncharacterized protein	JPJR01001868	O988_07757	A0A093XXH7	GI:682265570|EMBL-CDS:KFX91439.1	#FF0000	Pseudogymnoascus sp. VKM F-3808.	A0A093XXH7	392	A0A093XXH7	Pseudogymnoascus sp. VKM F-3808
1	664	Uncharacterized protein	JPKD01000356	V501_01095	A0A094HUW8	GI:682463180|EMBL-CDS:KFZ18657.1	#FF0000	Pseudogymnoascus sp. VKM F-4519	A0A094HUW8	498	A0A094HUW8	Pseudogymnoascus sp. VKM F-4519 (FW-2642)
1	664	Uncharacterized protein	CDHN01000001	VHEMI02327	A0A0A1SVH8	EMBL-CDS:CEJ82251.1	#FF0000	Torrubiella hemipterigena.	A0A0A1SVH8	371	A0A0A1SVH8	Torrubiella hemipterigena
1	664	Endoglucanase	AZHE01000022	MAM_06637	A0A0B2WRH2	GI:734658514|EMBL-CDS:KHN95580.1	#FF0000	Metarhizium album ARSEF 1941.	A0A0B2WRH2	234	A0A0B2WRH2	Metarhizium album ARSEF 1941
1	664	Copper-dependent polysaccharide monooxygenase	LASV01000410	T310_7189	A0A0F4YL78	GI:915138422|GI:802088912|EMBL-CDS:KKA18860.1|REFSEQ:XP_013325472.1	#FF0000	Rasamsonia emersonii CBS 393.64.	A0A0F4YL78	223	A0A0F4YL78	Rasamsonia emersonii CBS 393.64
1	664	Uncharacterized protein	LAEV01001665	TD95_001983	A0A0F4ZB03	GI:802100435|EMBL-CDS:KKA27470.1	#FF0000	Thielaviopsis punctulata.	A0A0F4ZB03	420	A0A0F4ZB03	Thielaviopsis punctulata
1	664	Uncharacterized protein	JOKZ01000009	THAR02_00586	A0A0G0A4V8	GI:818167952|EMBL-CDS:KKP07262.1	#FF0000	Trichoderma harzianum	A0A0G0A4V8	234	A0A0G0A4V8	Trichoderma harzianum
1	664	Uncharacterized protein	LFRF01000002	TOPH_00906	A0A0L0NJ23	GI:908393423|EMBL-CDS:KND94028.1	#FF0000	Tolypocladium ophioglossoides CBS 100239.	A0A0L0NJ23	293	A0A0L0NJ23	Tolypocladium ophioglossoides CBS 100239
1	664	Uncharacterized protein	LCTW02000443	MMYC01_208828	A0A175VRG2	GI:1003736349|EMBL-CDS:KXX73640.1	#FF0000	Madurella mycetomatis.	A0A175VRG2	349	A0A175VRG2	Madurella mycetomatis
1	664	RNA polymerase Rpb1 repeat domain-containing protein	LSBJ02000007	VFPPC_09553	A0A179F8P9	GI:1211169406|EMBL-CDS:OAQ61757.2	#FF0000	Pochonia chlamydosporia 170.	A0A179F8P9	418	A0A179F8P9	Pochonia chlamydosporia 170
1	664	Uncharacterized protein	KV454726	VE00_09466	A0A1B8BY98	GI:1040497646|EMBL-CDS:OBT39568.1	#FF0000	Pseudogymnoascus sp. WSF 3629.	A0A1B8BY98	355	A0A1B8BY98	Pseudogymnoascus sp. WSF 3629
1	664	Extracellular protein	MJBS01000073	CORC01_08517	A0A1G4B3Y3	GI:1088687773|EMBL-CDS:OHE96140.1	#FF0000	Colletotrichum orchidophilum.	A0A1G4B3Y3	442	A0A1G4B3Y3	Colletotrichum orchidophilum
1	664	Uncharacterized protein	MPGH01000005	CCHL11_07953	A0A1Q8S8H6	GI:1128272025|EMBL-CDS:OLN97758.1	#FF0000	Colletotrichum chlorophyti.	A0A1Q8S8H6	292	A0A1Q8S8H6	Colletotrichum chlorophyti
1	664	Uncharacterized protein	NAJO01000012	B0A48_06193	A0A1V8TA91	GI:1172593247|EMBL-CDS:OQO08323.1	#FF0000	Rachicladosporium antarcticum.	A0A1V8TA91	528	A0A1V8TA91	Rachicladosporium antarcticum
1	664	Uncharacterized protein	NKHU01000027	CDV56_02139	A0A231MMU9	GI:1226039625|EMBL-CDS:OXS11571.1	#FF0000	Aspergillus thermomutatus.	A0A231MMU9	485	A0A231MMU9	Aspergillus thermomutatus
1	664	Uncharacterized protein	APWK03000092	CFIMG_000196RA	A0A2C5WV73	EMBL-CDS:PHH51438.1	#FF0000	Ceratocystis fimbriata CBS 114723.	A0A2C5WV73	420	A0A2C5WV73	Ceratocystis fimbriata CBS 114723
1	664	Uncharacterized protein	NJET01000008	CDD81_7494	A0A2C5XBS3	EMBL-CDS:PHH66439.1	#FF0000	Ophiocordyceps australis.	A0A2C5XBS3	442	A0A2C5XBS3	Ophiocordyceps australis
1	664	Uncharacterized protein	NRSZ01000110	TCAP_00638	A0A2K3QPJ6	EMBL-CDS:PNY29447.1	#FF0000	Tolypocladium capitatum.	A0A2K3QPJ6	278	A0A2K3QPJ6	Tolypocladium capitatum
1	664	Uncharacterized protein	NQLC01000333	CI102_6999	A0A2N1LDP1	EMBL-CDS:PKK47511.1	#FF0000	Trichoderma harzianum	A0A2N1LDP1	234	A0A2N1LDP1	Trichoderma harzianum
1	664	Uncharacterized protein	KN294005	PAAG_05478	C1H3Y5	GI:226278863|GI:295664394|EMBL-CDS:EEH34429.1|REFSEQ:XP_002792749.1	#FF0000	Paracoccidioides lutzii (strain ATCC MYA-826 / Pb01)	C1H3Y5	444	C1H3Y5	Paracoccidioides lutzii Pb01
1	664	Uncharacterized protein	ABDG02000026	TRIATDRAFT_18328	G9P1W0	GI:358393987|GI:927389357|EMBL-CDS:EHK43388.1|REFSEQ:XP_013940524.1	#FF0000	Hypocrea atroviridis (strain ATCC 20476 / IMI 206040)	G9P1W0	217	G9P1W0	Trichoderma atroviride IMI 206040
1	664	Uncharacterized protein	JPKY01000016	ACRE_024520	A0A086TBG2	GI:672796145|EMBL-CDS:KFH46694.1	#FF0000	Acremonium chrysogenum (strain ATCC 11550 / CBS 779.69 / DSM 880 / JCM23072 / IMI 49137)	A0A086TBG2	374	A0A086TBG2	Acremonium chrysogenum ATCC 11550
1	664	Uncharacterized protein	JPJR01000580	O988_03498	A0A093Y5B0	GI:682278271|EMBL-CDS:KFY00129.1	#FF0000	Pseudogymnoascus sp. VKM F-3808.	A0A093Y5B0	217	A0A093Y5B0	Pseudogymnoascus sp. VKM F-3808
1	664	Uncharacterized protein	JPJY01000844	V496_04960	A0A094DQ70	GI:682377548|EMBL-CDS:KFY61610.1	#FF0000	Pseudogymnoascus sp. VKM F-4515	A0A094DQ70	217	A0A094DQ70	Pseudogymnoascus sp. VKM F-4515 (FW-2607)
1	664	Uncharacterized protein	JPJY01000101	V496_00685	A0A094DRK2	GI:682387289|EMBL-CDS:KFY68934.1	#FF0000	Pseudogymnoascus sp. VKM F-4515	A0A094DRK2	487	A0A094DRK2	Pseudogymnoascus sp. VKM F-4515 (FW-2607)
1	664	Uncharacterized protein	AZNG01000019	MBR_09046	A0A0B4FF42	GI:953393536|GI:743637670|EMBL-CDS:KID69043.1|REFSEQ:XP_014541010.1	#FF0000	Metarhizium brunneum ARSEF 3297.	A0A0B4FF42	220	A0A0B4FF42	Metarhizium brunneum ARSEF 3297
1	664	Uncharacterized protein	KN832876	OIDMADRAFT_163464	A0A0C3GZ02	GI:751753022|EMBL-CDS:KIN01201.1	#FF0000	Oidiodendron maius Zn.	A0A0C3GZ02	410	A0A0C3GZ02	Oidiodendron maius Zn
1	664	Uncharacterized protein	LBBL01000142	CFO_g2948	A0A0F8B100	GI:814600056|EMBL-CDS:KKF94726.1	#FF0000	Ceratocystis fimbriata f. sp. platani.	A0A0F8B100	420	A0A0F8B100	Ceratocystis platani
1	664	DNA-directed RNA polymerase	LDEV01003291	EMPG_10443	A0A0H1B525	GI:824362218|EMBL-CDS:KLJ06107.1	#FF0000	Emmonsia parva UAMH 139.	A0A0H1B525	254	A0A0H1B525	Emmonsia parva UAMH 139
1	664	Endoglucanase	KQ087362	Y699_02036	A0A0J5PYV6	GI:846915017|EMBL-CDS:KMK60835.1	#FF0000	Aspergillus fumigatus Z5.	A0A0J5PYV6	212	A0A0J5PYV6	Aspergillus fumigatus Z5
1	664	Uncharacterized protein	AZHB01000039	ISF_09012	A0A167LJS5	GI:1089744826|GI:1025665741|EMBL-CDS:OAA53171.1|REFSEQ:XP_018700243.1	#FF0000	Cordyceps fumosorosea ARSEF 2679.	A0A167LJS5	230	A0A167LJS5	Cordyceps fumosorosea ARSEF 2679
1	664	Uncharacterized protein	AZHB01000005	ISF_03096	A0A168B9X3	GI:1089732992|GI:1025682525|EMBL-CDS:OAA69826.1|REFSEQ:XP_018706430.1	#FF0000	Cordyceps fumosorosea ARSEF 2679.	A0A168B9X3	237	A0A168B9X3	Cordyceps fumosorosea ARSEF 2679
1	664	Uncharacterized protein	KV456155	VE04_03621	A0A1B8D9W0	GI:1040516811|EMBL-CDS:OBT55948.1	#FF0000	Pseudogymnoascus sp. 24MN13.	A0A1B8D9W0	355	A0A1B8D9W0	Pseudogymnoascus sp. 24MN13
1	664	Uncharacterized protein	KV454976	VE03_00859	A0A1B8EEE9	GI:1040532702|EMBL-CDS:OBT69722.1	#FF0000	Pseudogymnoascus sp. 23342-1-I1.	A0A1B8EEE9	424	A0A1B8EEE9	Pseudogymnoascus sp. 23342-1-I1
1	664	Uncharacterized protein	KV458932	VF21_09947	A0A1B8EIX6	GI:1040534705|EMBL-CDS:OBT71305.1	#FF0000	Pseudogymnoascus sp. 05NY08.	A0A1B8EIX6	217	A0A1B8EIX6	Pseudogymnoascus sp. 05NY08
1	664	Uncharacterized protein	KV459560	VE02_09332	A0A1B8FGC5	GI:1040546879|EMBL-CDS:OBT82679.1	#FF0000	Pseudogymnoascus sp. 03VT05.	A0A1B8FGC5	200	A0A1B8FGC5	Pseudogymnoascus sp. 03VT05
1	664	Uncharacterized protein	HG970333	FGRAMPH1_01T13831	A0A1C3YMY1	GI:1049476896|EMBL-CDS:SCB65865.1	#FF0000	Gibberella zeae (strain PH-1 / ATCC MYA-4620 / FGSC 9075 / NRRL 31084)	A0A1C3YMY1	326	A0A1C3YMY1	Fusarium graminearum PH-1
1	664	Uncharacterized protein	LVVK01000019	A0O28_0049820	A0A1T3CDT9	GI:1153487295|EMBL-CDS:OPB39276.1	#FF0000	Trichoderma guizhouense.	A0A1T3CDT9	438	A0A1T3CDT9	Trichoderma guizhouense
1	664	Uncharacterized protein	NPHW01004250	Egran_04017	A0A232LVL2	GI:1227550590|EMBL-CDS:OXV08220.1	#FF0000	Elaphomyces granulatus.	A0A232LVL2	362	A0A232LVL2	Elaphomyces granulatus
1	664	Uncharacterized protein	PDNC01000066	GX51_04956	A0A2B7WZI4	EMBL-CDS:PGH01902.1	#FF0000	Emmonsia parva.	A0A2B7WZI4	333	A0A2B7WZI4	Emmonsia parva
1	664	Uncharacterized protein	APWK03000020	CFIMG_002548RA	A0A2C5XCJ6	EMBL-CDS:PHH54756.1	#FF0000	Ceratocystis fimbriata CBS 114723.	A0A2C5XCJ6	307	A0A2C5XCJ6	Ceratocystis fimbriata CBS 114723
1	664	Uncharacterized protein	NQOC01000012	FGRA07_02868	A0A2H3GS83	GI:596540977|EMBL-CDS:PCD27729.1	#FF0000	Gibberella zeae	A0A2H3GS83	343	A0A2H3GS83	Fusarium graminearum
1	664	Uncharacterized protein	MTYI01000023	THARTR1_01933	A0A2K0UJ43	EMBL-CDS:PNP57775.1	#FF0000	Trichoderma harzianum	A0A2K0UJ43	439	A0A2K0UJ43	Trichoderma harzianum
1	664	Endoglucanase	GL698564	MAC_08098	E9EE00	GI:629698293|GI:322693997|EMBL-CDS:EFY85839.1|REFSEQ:XP_007814438.1	#FF0000	Metarhizium acridum (strain CQMa 102)	E9EE00	233	E9EE00	Metarhizium acridum CQMa 102
1	664	Uncharacterized protein	AFNW01000183	FPSE_06643	K3VGK7	GI:685862007|GI:408393962|EMBL-CDS:EKJ73219.1|REFSEQ:XP_009258036.1	#FF0000	Fusarium pseudograminearum (strain CS3096)	K3VGK7	343	K3VGK7	Fusarium pseudograminearum CS3096
1	664	Uncharacterized protein	CDHN01000001	VHEMI01914	A0A0A1T8V4	EMBL-CDS:CEJ81804.1	#FF0000	Torrubiella hemipterigena.	A0A0A1T8V4	249	A0A0A1T8V4	Torrubiella hemipterigena
1	664	Uncharacterized protein	AZHE01000010	MAM_04479	A0A0B2WUZ0	GI:734660410|EMBL-CDS:KHN97464.1	#FF0000	Metarhizium album ARSEF 1941.	A0A0B2WUZ0	216	A0A0B2WUZ0	Metarhizium album ARSEF 1941
1	664	Uncharacterized protein	CDPU01000020	BN869_000006909_1	A0A0B7K819	EMBL-CDS:CEO50851.1	#FF0000	Bionectria ochroleuca	A0A0B7K819	248	A0A0B7K819	Clonostachys rosea
1	664	Uncharacterized protein	KN846951	PV11_02775	A0A0D1ZK81	GI:759209867|EMBL-CDS:KIV87213.1	#FF0000	Exophiala sideris.	A0A0D1ZK81	593	A0A0D1ZK81	Exophiala sideris
1	664	Uncharacterized protein	LZYO01000309	ACO22_06112	A0A1D2J8I4	GI:1059605564|EMBL-CDS:ODH19756.1	#FF0000	Paracoccidioides brasiliensis.	A0A1D2J8I4	375	A0A1D2J8I4	Paracoccidioides brasiliensis
1	664	Putative endoglucanase	LYCR01000130	ABOM_010528	A0A1F7ZN10	GI:1084335065|EMBL-CDS:OGM40821.1	#FF0000	Aspergillus bombycis.	A0A1F7ZN10	219	A0A1F7ZN10	Aspergillus bombycis
1	664	Uncharacterized protein	MDYN01000001	PENANT_c001G01890	A0A1V6QNL5	GI:1168089737|EMBL-CDS:OQD90526.1	#FF0000	Penicillium antarcticum.	A0A1V6QNL5	407	A0A1V6QNL5	Penicillium antarcticum
1	664	Uncharacterized protein	LN891042	GSTUAT00005258001	A0A292PSN4	EMBL-CDS:CUS10642.1	#FF0000	Tuber aestivum	A0A292PSN4	437	A0A292PSN4	Tuber aestivum
1	664	Uncharacterized protein	PDNA01000166	AJ80_07976	A0A2B7XFZ4	EMBL-CDS:PGH07587.1	#FF0000	Polytolypa hystricis UAMH7299.	A0A2B7XFZ4	391	A0A2B7XFZ4	Polytolypa hystricis UAMH7299
1	664	Uncharacterized protein	NHZQ01000003	B9Z65_524	A0A2P8AIV9	EMBL-CDS:PSK60374.1	#FF0000	Elsinoe australis.	A0A2P8AIV9	491	A0A2P8AIV9	Elsinoe australis
1	664	Uncharacterized protein	KN275965	PADG_06832	C1GHU6	GI:226295333|GI:734684042|EMBL-CDS:EEH50753.1|REFSEQ:XP_010762250.1	#FF0000	Paracoccidioides brasiliensis (strain Pb18)	C1GHU6	382	C1GHU6	Paracoccidioides brasiliensis Pb18
1	664	Uncharacterized protein	FN430139	GSTUM_00000957001	D5GD41	GI:296417191|GI:295634168|EMBL-CDS:CAZ82434.1|REFSEQ:XP_002838243.1	#FF0000	Tuber melanosporum (strain Mel28)	D5GD41	321	D5GD41	Tuber melanosporum Mel28
1	664	Uncharacterized protein		FG03840	I1RJ41	GI:758198949|GI:558859262|EMBL-CDS:-|REFSEQ:XP_011321844.1	#FF0000	Gibberella zeae (strain PH-1 / ATCC MYA-4620 / FGSC 9075 / NRRL 31084)	I1RJ41	343	I1RJ41	Fusarium graminearum PH-1
1	664	Endoglucanase	CAUH01000281	BGHDH14_bgh00773	N1J990	EMBL-CDS:CCU74383.1	#FF0000	Blumeria graminis f. sp. hordei (strain DH14)	N1J990	357	N1J990	Blumeria graminis f. sp. hordei DH14
1	664	Uncharacterized protein	KE374989	BGT96224_1299	A0A061HJM3	GI:521775807|EMBL-CDS:EPQ66731.1	#FF0000	Blumeria graminis f. sp. tritici 96224.	A0A061HJM3	357	A0A061HJM3	Blumeria graminis f. sp. tritici 96224
1	664	Uncharacterized protein	KL659480	S40285_04633	A0A084QZS9	GI:667728460|EMBL-CDS:KFA69464.1	#FF0000	Stachybotrys chlorohalonata (strain IBT 40285)	A0A084QZS9	238	A0A084QZS9	Stachybotrys chlorohalonata IBT 40285
1	664	Uncharacterized protein	JPJR01000329	O988_02070	A0A093YBZ5	GI:682281500|EMBL-CDS:KFY02571.1	#FF0000	Pseudogymnoascus sp. VKM F-3808.	A0A093YBZ5	389	A0A093YBZ5	Pseudogymnoascus sp. VKM F-3808
1	664	Uncharacterized protein	CDHK01000006	PMG11_06998	A0A0F7TNL9	EMBL-CDS:CEJ58339.1	#FF0000	Penicillium brasilianum.	A0A0F7TNL9	219	A0A0F7TNL9	Penicillium brasilianum
1	664	RNA polymerase Rpb1 repeat domain-containingprotein	LSBI01000006	VFPBJ_05549	A0A179GQ06	GI:1032873244|GI:1069604078|GI:1032881924|EMBL-CDS:OAQ79964.1|EMBL-CDS:OAQ88633.1|REFSEQ:XP_018177352.1	#FF0000	Purpureocillium lilacinum.	A0A179GQ06	225	A0A179GQ06	Purpureocillium lilacinum
1	664	Uncharacterized protein	LYXU01000002	FPOA_05682	A0A1B8AXD0	GI:1040032421|EMBL-CDS:OBS25147.1	#FF0000	Fusarium poae.	A0A1B8AXD0	645	A0A1B8AXD0	Fusarium poae
1	664	Uncharacterized protein	FJOG01000018	PAC_11222	A0A1L7X8K6	EMBL-CDS:CZR61326.1	#FF0000	Phialocephala subalpina.	A0A1L7X8K6	400	A0A1L7X8K6	Phialocephala subalpina
1	664	Uncharacterized protein	GL891305	NEUTE1DRAFT_117496	F8MR41	GI:698990808|GI:336468658|EMBL-CDS:EGO56821.1|REFSEQ:XP_009852385.1	#FF0000	Neurospora tetrasperma (strain FGSC 2508 / ATCC MYA-4615 / P0657)	F8MR41	447	F8MR41	Neurospora tetrasperma FGSC 2508
1	664	Uncharacterized protein	GL891247	NEUTE2DRAFT_144984	G4URR3	GI:350289064|EMBL-CDS:EGZ70289.1	#FF0000	Neurospora tetrasperma (strain FGSC 2509 / P0656)	G4URR3	447	G4URR3	Neurospora tetrasperma FGSC 2509
1	664	Endoglucanase	CM002237	NCU05404	Q1K8R8	GI:85110504|GI:28925174|EMBL-CDS:EAA34256.1|REFSEQ:XP_963492.1	#FF0000	Neurospora crassa (strain ATCC 24698 / 74-OR23-1A / CBS 708.71 / DSM1257 / FGSC 987)	Q1K8R8	461	Q1K8R8	Neurospora crassa OR74A
1	664	Lytic polysaccharide monooxygenase	KN389663	GE21DRAFT_2989	Q9P3J7	GI:725982219|GI:9367560|EMBL-CDS:CAB97468.1|EMBL-CDS:KHE85300.1	#FF0000	Neurospora crassa.	Q9P3J7	461	Q9P3J7	Neurospora crassa
1	664	Uncharacterized protein	KL648405	S7711_08529	A0A084AZV0	GI:666405297|EMBL-CDS:KEY70829.1	#FF0000	Stachybotrys chartarum (strain CBS 109288 / IBT 7711)	A0A084AZV0	238	A0A084AZV0	Stachybotrys chartarum IBT 7711
1	664	Uncharacterized protein	KL657441	S40288_02338	A0A084RSL6	GI:667740236|EMBL-CDS:KFA79201.1	#FF0000	Stachybotrys chartarum IBT 40288.	A0A084RSL6	238	A0A084RSL6	Stachybotrys chartarum IBT 40288
1	664	Uncharacterized protein	AZNH01000125	MGU_10948	A0A0B4GPM9	GI:743654106|EMBL-CDS:KID81712.1	#FF0000	Metarhizium guizhouense ARSEF 977.	A0A0B4GPM9	220	A0A0B4GPM9	Metarhizium guizhouense ARSEF 977
1	664	Uncharacterized protein	KE384735	H634G_06308	A0A0D9NWB9	GI:770392152|EMBL-CDS:KJK78136.1	#FF0000	Metarhizium anisopliae BRIP 53293.	A0A0D9NWB9	233	A0A0D9NWB9	Metarhizium anisopliae BRIP 53293
1	664	Uncharacterized protein	KQ030508	HIM_03323	A0A0F8A2G5	GI:799248282|EMBL-CDS:KJZ77002.1	#FF0000	Hirsutella minnesotensis 3608.	A0A0F8A2G5	232	A0A0F8A2G5	Hirsutella minnesotensis 3608
1	664	Uncharacterized protein	LYUC01000081	GX48_06263	A0A1E2XYG4	GI:1059635227|EMBL-CDS:ODH47646.1	#FF0000	Paracoccidioides brasiliensis.	A0A1E2XYG4	375	A0A1E2XYG4	Paracoccidioides brasiliensis
1	664	Uncharacterized protein	MLKD01000004	PENSTE_c004G01579	A0A1V6TNZ1	GI:1168128256|EMBL-CDS:OQE27539.1	#FF0000	Penicillium steckii.	A0A1V6TNZ1	413	A0A1V6TNZ1	Penicillium steckii
1	664	Uncharacterized protein	LN890954	GSTUAT00001013001	A0A292Q854	EMBL-CDS:CUS14943.1	#FF0000	Tuber aestivum	A0A292Q854	327	A0A292Q854	Tuber aestivum
1	664	WGS project CABT00000000 data| contig 2.15	CABT02000015	SMAC_04148	F7VZH1	GI:336263874|EMBL-CDS:CCC10919.1|REFSEQ:XP_003346716.1	#FF0000	Sordaria macrospora (strain ATCC MYA-333 / DSM 997 / K(L3346)	F7VZH1	446	F7VZH1	Sordaria macrospora k-hell
1	664	Uncharacterized protein	GL988039	CTHT_0015740	G0S225	GI:340975970|GI:576036408|EMBL-CDS:EGS23085.1|REFSEQ:XP_006692077.1	#FF0000	Chaetomium thermophilum (strain DSM 1495 / CBS 144.50 / IMI 039719)	G0S225	423	G0S225	Chaetomium thermophilum var. thermophilum DSM 1495
1	664	Carbohydrate-Binding Module family 18 protein	FQ790352	BofuT4P246000005001	G2YTU7	GI:347840285|EMBL-CDS:CCD54857.1	#FF0000	Botryotinia fuckeliana (strain T4)	G2YTU7	412	G2YTU7	Botrytis cinerea T4
1	664	Putative carbohydrate-binding module family 18 protein	KB708098	BcDW1_10558	M7UBT2	GI:472235880|EMBL-CDS:EMR80832.1	#FF0000	Botryotinia fuckeliana (strain BcDW1)	M7UBT2	412	M7UBT2	Botrytis cinerea BcDW1
1	664	Uncharacterized protein	JPJV01000518	V493_01412	A0A094AUP3	GI:682332631|EMBL-CDS:KFY31083.1	#FF0000	Pseudogymnoascus sp. VKM F-4281	A0A094AUP3	621	A0A094AUP3	Pseudogymnoascus sp. VKM F-4281 (FW-2241)
1	664	Endoglucanase	AZNF01000001	MAN_00042	A0A0B4FJ33	GI:743639076|EMBL-CDS:KID70443.1	#FF0000	Metarhizium anisopliae ARSEF 549.	A0A0B4FJ33	233	A0A0B4FJ33	Metarhizium anisopliae ARSEF 549
1	664	Uncharacterized protein	KE384729	H634G_04188	A0A0D9P120	GI:770393971|EMBL-CDS:KJK79949.1	#FF0000	Metarhizium anisopliae BRIP 53293.	A0A0D9P120	223	A0A0D9P120	Metarhizium anisopliae BRIP 53293
1	664	Uncharacterized protein	CVQH01024749	BN1708_001439	A0A0G4MTV7	EMBL-CDS:CRK37415.1	#FF0000	Verticillium longisporum.	A0A0G4MTV7	428	A0A0G4MTV7	Verticillium longisporum
1	664	Extracellular protein	JEMN01001258	CNYM01_03923	A0A135T2J3	GI:996604705|EMBL-CDS:KXH42334.1	#FF0000	Colletotrichum nymphaeae SA-01.	A0A135T2J3	433	A0A135T2J3	Colletotrichum nymphaeae SA-01
1	664	Extracellular protein	JFFI01001729	CSAL01_08732	A0A135U4U5	GI:996627251|EMBL-CDS:KXH55408.1	#FF0000	Colletotrichum salicis.	A0A135U4U5	436	A0A135U4U5	Colletotrichum salicis
1	664	Uncharacterized protein	KQ947424	LY89DRAFT_592922	A0A194WWG7	GI:1069186650|GI:972535690|EMBL-CDS:KUJ12321.1|REFSEQ:XP_018066676.1	#FF0000	Phialocephala scopiformis.	A0A194WWG7	333	A0A194WWG7	Phialocephala scopiformis
1	664	Uncharacterized protein	FJVC01000228	RSE6_06229	A0A1E1M9U5	EMBL-CDS:CZT45873.1	#FF0000	Rhynchosporium secalis	A0A1E1M9U5	350	A0A1E1M9U5	Rhynchosporium secalis
1	664	Uncharacterized protein	PHNV01000060	VD0003_g2892	A0A2J8FRU6	EMBL-CDS:PNH54638.1	#FF0000	Verticillium dahliae	A0A2J8FRU6	425	A0A2J8FRU6	Verticillium dahliae
1	664	Uncharacterized protein	LN649230	None	A0A2L2SX38	EMBL-CDS:CEI62422.1	#FF0000	Fusarium venenatum.	A0A2L2SX38	345	A0A2L2SX38	Fusarium venenatum
1	664	Uncharacterized protein	CH476655	HCAG_01098	A6QUP2	GI:154286514|GI:150407693|EMBL-CDS:EDN03234.1|REFSEQ:XP_001544052.1	#FF0000	Ajellomyces capsulatus (strain NAm1 / WU24)	A6QUP2	302	A6QUP2	Histoplasma capsulatum NAm1
1	664	Uncharacterized protein	DS572700	VDAG_04057	G2X1C8	GI:346979167|GI:697076440|EMBL-CDS:EGY22619.1|REFSEQ:XP_009652436.1	#FF0000	Verticillium dahliae (strain VdLs.17 / ATCC MYA-4575 / FGSC 10137)	G2X1C8	425	G2X1C8	Verticillium dahliae VdLs.17
1	664	Uncharacterized protein	GL385397	GGTG_06068	J3NXR4	GI:402081001|GI:685406575|EMBL-CDS:EJT76146.1|REFSEQ:XP_009222146.1	#FF0000	Gaeumannomyces graminis var. tritici (strain R3-111a-1)	J3NXR4	287	J3NXR4	Gaeumannomyces tritici R3-111a-1
1	664	Uncharacterized protein	KB445557	BAUCODRAFT_518344	M2MTQ8	GI:449298909|GI:627808577|EMBL-CDS:EMC94923.1|REFSEQ:XP_007677636.1	#FF0000	Baudoinia panamericana (strain UAMH 10762)	M2MTQ8	522	M2MTQ8	Baudoinia panamericana UAMH 10762
1	664	Putative spore coat protein sp96-like protein	KB932955	UCRPA7_2608	R8BR99	GI:500258992|GI:631236894|EMBL-CDS:EOO01866.1|REFSEQ:XP_007913369.1	#FF0000	Togninia minima (strain UCR-PA7)	R8BR99	475	R8BR99	Phaeoacremonium minimum UCRPA7
1	664	Extracellular protein	JARH01000146	CFIO01_10811	A0A010R7R7	GI:588904905|GI:615440802|EMBL-CDS:EXF84745.1|REFSEQ:XP_007591599.1	#FF0000	Colletotrichum fioriniae PJ7.	A0A010R7R7	437	A0A010R7R7	Colletotrichum fioriniae PJ7
1	664	Uncharacterized protein	JELW01000191	X797_012269	A0A014P0G1	GI:594711581|EMBL-CDS:EXU94656.1	#FF0000	Metarhizium robertsii.	A0A014P0G1	227	A0A014P0G1	Metarhizium robertsii
1	664	Uncharacterized protein	JELW01000013	X797_006553	A0A014PA68	GI:594717593|EMBL-CDS:EXV00491.1	#FF0000	Metarhizium robertsii.	A0A014PA68	222	A0A014PA68	Metarhizium robertsii
1	664	Uncharacterized protein	KK207704	H103_00699	A0A022WF73	GI:607921426|EMBL-CDS:EZF56964.1	#FF0000	Trichophyton rubrum CBS 288.86.	A0A022WF73	218	A0A022WF73	Trichophyton rubrum CBS 288.86
1	664	Uncharacterized protein	KK208731	H105_00694	A0A022Y6Q4	GI:607945473|EMBL-CDS:EZF78303.1	#FF0000	Trichophyton soudanense CBS 452.61.	A0A022Y6Q4	218	A0A022Y6Q4	Trichophyton soudanense CBS 452.61
1	664	Uncharacterized protein	JHTR01000030	UV8b_5474	A0A063BWN7	GI:632913965|EMBL-CDS:KDB13642.1	#FF0000	Ustilaginoidea virens.	A0A063BWN7	280	A0A063BWN7	Ustilaginoidea virens
1	664	Uncharacterized protein	JPJY01000153	V496_01053	A0A094DPT7	GI:682386610|EMBL-CDS:KFY68431.1	#FF0000	Pseudogymnoascus sp. VKM F-4515	A0A094DPT7	362	A0A094DPT7	Pseudogymnoascus sp. VKM F-4515 (FW-2607)
1	664	Uncharacterized protein	JPJZ01000060	V497_00474	A0A094G5X5	GI:682385169|EMBL-CDS:KFY67272.1	#FF0000	Pseudogymnoascus sp. VKM F-4516	A0A094G5X5	217	A0A094G5X5	Pseudogymnoascus sp. VKM F-4516 (FW-969)
1	664	Uncharacterized protein	JPKA01000498	V498_03020	A0A094IHB6	GI:682429613|EMBL-CDS:KFY95942.1	#FF0000	Pseudogymnoascus sp. VKM F-4517	A0A094IHB6	362	A0A094IHB6	Pseudogymnoascus sp. VKM F-4517 (FW-2822)
1	664	Uncharacterized protein	JELW01000024	X797_008163	A0A0A1US36	GI:594715781|EMBL-CDS:EXU98689.1	#FF0000	Metarhizium robertsii.	A0A0A1US36	233	A0A0A1US36	Metarhizium robertsii
1	664	Uncharacterized protein	ANFO01000403	BBAD15_g4877	A0A0A2W9X8	GI:701775774|EMBL-CDS:KGQ09774.1	#FF0000	Beauveria bassiana D1-5.	A0A0A2W9X8	234	A0A0A2W9X8	Beauveria bassiana D1-5
1	664	Endoglucanase	AZNG01000017	MBR_08591	A0A0B4FDF6	GI:743640655|GI:953393968|EMBL-CDS:KID72020.1|REFSEQ:XP_014541226.1	#FF0000	Metarhizium brunneum ARSEF 3297.	A0A0B4FDF6	233	A0A0B4FDF6	Metarhizium brunneum ARSEF 3297
1	664	Uncharacterized protein	AZNF01000007	MAN_06222	A0A0B4FHB1	GI:743633819|EMBL-CDS:KID65211.1	#FF0000	Metarhizium anisopliae ARSEF 549.	A0A0B4FHB1	221	A0A0B4FHB1	Metarhizium anisopliae ARSEF 549
1	664	Endoglucanase	AZNH01000037	MGU_07980	A0A0B4GD34	GI:743657485|EMBL-CDS:KID84830.1	#FF0000	Metarhizium guizhouense ARSEF 977.	A0A0B4GD34	233	A0A0B4GD34	Metarhizium guizhouense ARSEF 977
1	664	Uncharacterized protein	GL876968	MAPG_04046	A0A0C4DVN7	GI:835892925|EMBL-CDS:-|EMBL-CDS:KLU85012.1	#FF0000	Magnaporthiopsis poae (strain ATCC 64411 / 73-15)	A0A0C4DVN7	335	A0A0C4DVN7	Magnaporthiopsis poae ATCC 64411
1	664	Uncharacterized protein	AXCR01000008	SPSK_00284	A0A0F2M2N4	GI:1026983484|GI:780593220|EMBL-CDS:KJR83947.1|REFSEQ:XP_016586623.1	#FF0000	Sporothrix schenckii 1099-18.	A0A0F2M2N4	416	A0A0F2M2N4	Sporothrix schenckii 1099-18
1	664	Uncharacterized protein	CDHK01000006	PMG11_06690	A0A0F7TMP7	EMBL-CDS:CEJ58018.1	#FF0000	Penicillium brasilianum.	A0A0F7TMP7	451	A0A0F7TMP7	Penicillium brasilianum
1	664	Uncharacterized protein	LUKN01000882	LLEC1_04327	A0A179II89	GI:1032906814|EMBL-CDS:OAR02055.1	#FF0000	Cordyceps confragosa	A0A179II89	227	A0A179II89	Cordyceps confragosa
1	664	Uncharacterized protein	FJUW01000012	RCO7_04823	A0A1E1KEW8	EMBL-CDS:CZS96569.1	#FF0000	Rhynchosporium commune.	A0A1E1KEW8	350	A0A1E1KEW8	Rhynchosporium commune
1	664	Uncharacterized protein	MNBE01000625	PENSUB_7066	A0A1Q5TQN5	GI:1120656634|EMBL-CDS:OKP02533.1	#FF0000	Penicillium subrubescens.	A0A1Q5TQN5	458	A0A1Q5TQN5	Penicillium subrubescens
1	664	Uncharacterized protein	LJBN01000118	PEBR_12744	A0A1S9RTF8	GI:1151454992|EMBL-CDS:OOQ88580.1	#FF0000	Penicillium brasilianum.	A0A1S9RTF8	452	A0A1S9RTF8	Penicillium brasilianum
1	664	Uncharacterized protein	LN891027	GSTUAT00004677001	A0A292PXP8	EMBL-CDS:CUS11250.1	#FF0000	Tuber aestivum	A0A292PXP8	447	A0A292PXP8	Tuber aestivum
1	664	Lytic polysaccharide monooxygenase	KZ613746	K444DRAFT_514007	A0A2J6TQX4	EMBL-CDS:PMD65427.1	#FF0000	Meliniomyces bicolor E.	A0A2J6TQX4	281	A0A2J6TQX4	Meliniomyces bicolor E
1	664	Endoglucanase| putative	GL698482	MAC_02571	E9DY73	GI:629687231|GI:322699648|EMBL-CDS:EFY91408.1|REFSEQ:XP_007808911.1	#FF0000	Metarhizium acridum (strain CQMa 102)	E9DY73	802	E9DY73	Metarhizium acridum CQMa 102
1	664	Uncharacterized protein	ADNJ02000011	MAA_06691	E9F342	GI:629724986|GI:322706327|EMBL-CDS:EFY97908.1|REFSEQ:XP_007822880.1	#FF0000	Metarhizium robertsii (strain ARSEF 23 / ATCC MYA-3075)	E9F342	222	E9F342	Metarhizium robertsii ARSEF 23
1	664	Extracellular protein	ADNJ02000006	MAA_09021	E9F9S2	GI:322703964|GI:629732238|EMBL-CDS:EFY95565.1|REFSEQ:XP_007825210.1	#FF0000	Metarhizium robertsii (strain ARSEF 23 / ATCC MYA-3075)	E9F9S2	233	E9F9S2	Metarhizium robertsii ARSEF 23
1	664	Uncharacterized protein	ADNJ02000020	MAA_10167	E9FD18	GI:629735776|GI:322702733|EMBL-CDS:EFY94360.1|REFSEQ:XP_007826356.1	#FF0000	Metarhizium robertsii (strain ARSEF 23 / ATCC MYA-3075)	E9FD18	227	E9FD18	Metarhizium robertsii ARSEF 23
1	664	Uncharacterized protein	GG700658	TERG_07817	F2SZ47	GI:327293644|GI:326466146|EMBL-CDS:EGD91599.1|REFSEQ:XP_003231518.1	#FF0000	Trichophyton rubrum (strain ATCC MYA-4607 / CBS 118892)	F2SZ47	218	F2SZ47	Trichophyton rubrum CBS 118892
1	664	Extracellular protein	JH126405	CCM_08665	G3JRL7	GI:346319018|GI:573991889|EMBL-CDS:EGX88620.1|REFSEQ:XP_006673865.1	#FF0000	Cordyceps militaris (strain CM01)	G3JRL7	232	G3JRL7	Cordyceps militaris CM01
1	664	Uncharacterized protein	KI440857	HMPREF1624_08661	U7PKB0	GI:550803024|EMBL-CDS:ERS94950.1	#FF0000	Sporothrix schenckii (strain ATCC 58251 / de Perez 2211183)	U7PKB0	416	U7PKB0	Sporothrix schenckii ATCC 58251
1	664	Uncharacterized protein	AMGW01000006	A1O7_08489	W9VTR9	GI:628309340|GI:589972228|EMBL-CDS:EXJ55561.1|REFSEQ:XP_007760671.1	#FF0000	Cladophialophora yegresii CBS 114405.	W9VTR9	288	W9VTR9	Cladophialophora yegresii CBS 114405
1	664	Endoglucanase	AZNE01000048	MAJ_07490	A0A0B4IG37	GI:953464147|GI:743669594|EMBL-CDS:KID96554.1|REFSEQ:XP_014575548.1	#FF0000	Metarhizium majus ARSEF 297.	A0A0B4IG37	234	A0A0B4IG37	Metarhizium majus ARSEF 297
1	664	Putative spore coat protein sp96	LCUC01000879	UCDDA912_g10719	A0A0G2HM72	GI:821075162|EMBL-CDS:KKY29360.1	#FF0000	Diaporthe ampelina.	A0A0G2HM72	388	A0A0G2HM72	Diaporthe ampelina
1	664	Uncharacterized protein	CVQH01024749	BN1708_001437	A0A0G4MT38	EMBL-CDS:CRK37413.1	#FF0000	Verticillium longisporum.	A0A0G4MT38	801	A0A0G4MT38	Verticillium longisporum
1	664	Uncharacterized protein	KQ087235	CC85DRAFT_287531	A0A0J0XH58	GI:831330837|GI:1071048872|EMBL-CDS:KLT40426.1|REFSEQ:XP_018276917.1	#FF0000	Cutaneotrichosporon oleaginosum.	A0A0J0XH58	359	A0A0J0XH58	Cutaneotrichosporon oleaginosum
1	664	Uncharacterized protein	LFRF01000029	TOPH_07286	A0A0L0N1X4	GI:908387306|EMBL-CDS:KND88021.1	#FF0000	Tolypocladium ophioglossoides CBS 100239.	A0A0L0N1X4	232	A0A0L0N1X4	Tolypocladium ophioglossoides CBS 100239
1	664	Uncharacterized protein	LHQQ01000107	ACN38_g6748	A0A0M8NZG4	GI:924886325|EMBL-CDS:KOS42396.1	#FF0000	Penicillium nordicum.	A0A0M8NZG4	271	A0A0M8NZG4	Penicillium nordicum
1	664	Uncharacterized protein	LLXE01000422	ACN42_g10297	A0A101MAB2	GI:973782455|EMBL-CDS:KUM56899.1	#FF0000	Penicillium freii.	A0A101MAB2	271	A0A101MAB2	Penicillium freii
1	664	Uncharacterized protein	AZHF01000030	LEL_10926	A0A167Q6S4	GI:1025669996|EMBL-CDS:OAA57352.1	#FF0000	Cordyceps confragosa RCEF 1005.	A0A167Q6S4	204	A0A167Q6S4	Cordyceps confragosa RCEF 1005
1	664	Extracellular protein	AZHF01000005	LEL_06833	A0A168F9C1	GI:1025687555|EMBL-CDS:OAA74845.1	#FF0000	Cordyceps confragosa RCEF 1005.	A0A168F9C1	230	A0A168F9C1	Cordyceps confragosa RCEF 1005
1	664	Extracellular protein	LSBJ02000003	VFPPC_13549	A0A179FQV1	GI:1032860814|GI:1069526822|EMBL-CDS:OAQ67590.1|REFSEQ:XP_018144440.1	#FF0000	Pochonia chlamydosporia 170.	A0A179FQV1	221	A0A179FQV1	Pochonia chlamydosporia 170
1	664	Uncharacterized protein	FJUX01000013	RAG0_03258	A0A1E1K3Q1	EMBL-CDS:CZS92735.1	#FF0000	Rhynchosporium agropyri.	A0A1E1K3Q1	350	A0A1E1K3Q1	Rhynchosporium agropyri
1	664	Uncharacterized protein	NJES01000709	CDD80_6478	A0A2C5YM18	EMBL-CDS:PHH69807.1	#FF0000	Ophiocordyceps camponoti-rufipedis.	A0A2C5YM18	224	A0A2C5YM18	Ophiocordyceps camponoti-rufipedis
1	664	Uncharacterized protein	FJUY01000003	RCC_02504	A0A2D3V5A4	EMBL-CDS:CZT16669.1	#FF0000	Ramularia collo-cygni.	A0A2D3V5A4	483	A0A2D3V5A4	Ramularia collo-cygni
1	664	Uncharacterized protein	MRVG01000002	BM221_002126	A0A2N6NXP4	EMBL-CDS:PMB72027.1	#FF0000	Beauveria bassiana	A0A2N6NXP4	222	A0A2N6NXP4	Beauveria bassiana
1	664	Uncharacterized protein	FN429998	GSTUM_00004277001	D5G5D3	GI:295629355|GI:296411703|EMBL-CDS:CAZ79726.1|REFSEQ:XP_002835569.1	#FF0000	Tuber melanosporum (strain Mel28)	D5G5D3	438	D5G5D3	Tuber melanosporum Mel28
1	664	Extracellular protein	JH725156	BBA_03447	J4UQL0	GI:667649869|GI:400599976|EMBL-CDS:EJP67667.1|REFSEQ:XP_008596766.1	#FF0000	Beauveria bassiana (strain ARSEF 2860)	J4UQL0	237	J4UQL0	Beauveria bassiana ARSEF 2860
1	664	Uncharacterized protein	HF936663	PCON_04599	U4LYJ4	GI:549042328|EMBL-CDS:CCX34923.1	#FF0000	Pyronema omphalodes (strain CBS 100304)	U4LYJ4	372	U4LYJ4	Pyronema omphalodes CBS 100304
1	664	Uncharacterized protein	KB822707	G647_07464	V9D2L2	GI:671179079|GI:565931835|EMBL-CDS:ETI21120.1|REFSEQ:XP_008730001.1	#FF0000	Cladophialophora carrionii CBS 160.54.	V9D2L2	684	V9D2L2	Cladophialophora carrionii CBS 160.54
1	664	Uncharacterized protein	DF933852	TCE0_056f18489	A0A0B8MZD7	GI:748550695|EMBL-CDS:GAM43570.1	#FF0000	Talaromyces cellulolyticus.	A0A0B8MZD7	1099	A0A0B8MZD7	Talaromyces cellulolyticus
1	664	Uncharacterized protein	KQ030518	HIM_05270	A0A0F8A5H6	GI:799246551|EMBL-CDS:KJZ75344.1	#FF0000	Hirsutella minnesotensis 3608.	A0A0F8A5H6	231	A0A0F8A5H6	Hirsutella minnesotensis 3608
1	664	Uncharacterized protein	LBBL01000076	CFO_g1797	A0A0F8B5J7	GI:814601231|EMBL-CDS:KKF95835.1	#FF0000	Ceratocystis fimbriata f. sp. platani.	A0A0F8B5J7	208	A0A0F8B5J7	Ceratocystis platani
1	664	Uncharacterized protein	DS268110	CPAG_04210	A0A0J6I8N0	GI:855532730|EMBL-CDS:KMM67877.1	#FF0000	Coccidioides posadasii RMSCC 3488.	A0A0J6I8N0	214	A0A0J6I8N0	Coccidioides posadasii RMSCC 3488
1	664	Extracellular protein	JFBX01000623	CSIM01_07600	A0A135SB75	GI:996589265|EMBL-CDS:KXH33168.1	#FF0000	Colletotrichum simmondsii.	A0A135SB75	433	A0A135SB75	Colletotrichum simmondsii
1	664	Extracellular protein	LSBI01000011	VFPBJ_08998	A0A179GL98	GI:1032869896|GI:1069622723|GI:1032871453|EMBL-CDS:OAQ76638.1|EMBL-CDS:OAQ78180.1|REFSEQ:XP_018174311.1	#FF0000	Purpureocillium lilacinum.	A0A179GL98	227	A0A179GL98	Purpureocillium lilacinum
1	664	Uncharacterized protein	LUKN01002421	LLEC1_06886	A0A179I8V4	GI:1032900771|EMBL-CDS:OAQ99095.1	#FF0000	Cordyceps confragosa	A0A179I8V4	230	A0A179I8V4	Cordyceps confragosa
1	664	Uncharacterized protein	MDYL01000004	PENDEC_c004G06221	A0A1V6PHW6	GI:1168074935|EMBL-CDS:OQD76645.1	#FF0000	Penicillium decumbens.	A0A1V6PHW6	421	A0A1V6PHW6	Penicillium decumbens
1	664	Uncharacterized protein	LAZP02000106	XA68_10292	A0A2A9PIH3	EMBL-CDS:PFH60831.1	#FF0000	Ophiocordyceps unilateralis.	A0A2A9PIH3	224	A0A2A9PIH3	Ophiocordyceps unilateralis
1	664	Uncharacterized protein	ACFW01000025	CPC735_032420	C5P5B6	GI:240109737|GI:303320103|EMBL-CDS:EER27906.1|REFSEQ:XP_003070051.1	#FF0000	Coccidioides posadasii (strain C735)	C5P5B6	214	C5P5B6	Coccidioides posadasii C735 delta SOWgp
1	664	Endoglucanase	GL636510	CPSG_09496	E9DI47	GI:320031886|EMBL-CDS:EFW13843.1	#FF0000	Coccidioides posadasii (strain RMSCC 757 / Silveira)	E9DI47	214	E9DI47	Coccidioides posadasii str. Silveira
1	664	Carbohydrate-Binding Module family 18 protein	AYSA01000046	SBOR_1372	W9CR12	GI:563298156|EMBL-CDS:ESZ98276.1	#FF0000	Sclerotinia borealis F-4128.	W9CR12	398	W9CR12	Sclerotinia borealis F-4128
1	664	Putative endoglucanase	KI911140	M419DRAFT_135815	A0A024SK73	GI:572282294|EMBL-CDS:ETS05308.1	#FF0000	Hypocrea jecorina (strain ATCC 56765 / BCRC 32924 / NRRL 11460 / RutC-30)	A0A024SK73	234	A0A024SK73	Trichoderma reesei RUT C-30
1	664	Uncharacterized protein	JPKC01002357	V500_07623	A0A094HQF7	GI:682415272|EMBL-CDS:KFY86452.1	#FF0000	Pseudogymnoascus sp. VKM F-4518	A0A094HQF7	355	A0A094HQF7	Pseudogymnoascus sp. VKM F-4518 (FW-2643)
1	664	Uncharacterized protein	AWTV01000005	SPBR_04267	A0A0C2IWJ0	GI:748543218|EMBL-CDS:KIH93521.1	#FF0000	Sporothrix brasiliensis 5110.	A0A0C2IWJ0	415	A0A0C2IWJ0	Sporothrix brasiliensis 5110
1	664	Uncharacterized protein	DS028094	CIRG_03689	A0A0J7B2J0	GI:859409448|EMBL-CDS:KMP03997.1	#FF0000	Coccidioides immitis RMSCC 2394.	A0A0J7B2J0	214	A0A0J7B2J0	Coccidioides immitis RMSCC 2394
1	664	Uncharacterized protein	DS268119	CISG_00897	A0A0J8QUL8	GI:875281240|EMBL-CDS:KMU74968.1	#FF0000	Coccidioides immitis RMSCC 3703.	A0A0J8QUL8	214	A0A0J8QUL8	Coccidioides immitis RMSCC 3703
1	664	Uncharacterized protein	CM003108	VM1G_09575	A0A194WC38	GI:972147414|EMBL-CDS:KUI73663.1	#FF0000	Valsa mali.	A0A194WC38	367	A0A194WC38	Valsa mali
1	664	Uncharacterized protein	FJOG01000030	PAC_15215	A0A1L7XJT4	EMBL-CDS:CZR65315.1	#FF0000	Phialocephala subalpina.	A0A1L7XJT4	520	A0A1L7XJT4	Phialocephala subalpina
1	664	Uncharacterized protein	KV878219	ASPWEDRAFT_188451	A0A1L9R3Z3	GI:1111846702|EMBL-CDS:OJJ29607.1	#FF0000	Aspergillus wentii DTO 134E9.	A0A1L9R3Z3	230	A0A1L9R3Z3	Aspergillus wentii DTO 134E9
1	664	Endoglucanase	MSFO01000001	P170DRAFT_345740	A0A2I2GLQ7	EMBL-CDS:PLB53804.1	#FF0000	Aspergillus steynii IBT 23096.	A0A2I2GLQ7	222	A0A2I2GLQ7	Aspergillus steynii IBT 23096
1	664	Uncharacterized protein	GG698900	NECHADRAFT_85135	C7YV33	GI:256731161|GI:302910136|EMBL-CDS:EEU44511.1|REFSEQ:XP_003050224.1	#FF0000	Nectria haematococca (strain 77-13-4 / ATCC MYA-4622 / FGSC 9596 /MPVI)	C7YV33	320	C7YV33	[Nectria] haematococca mpVI 77-13-4
1	664	Predicted protein	GL985057	TRIREDRAFT_31447	G0R9X1	GI:589099953|GI:340521798|EMBL-CDS:EGR52032.1|REFSEQ:XP_006961999.1	#FF0000	Hypocrea jecorina (strain QM6a)	G0R9X1	217	G0R9X1	Trichoderma reesei QM6a
1	664	Putative Killer toxin subunits alpha/beta	AGUE01000200	M7I_6998	H0EW22	GI:361125217|EMBL-CDS:EHK97268.1	#FF0000	Glarea lozoyensis (strain ATCC 74030 / MF5533)	H0EW22	313	H0EW22	Glarea lozoyensis 74030
1	664	RNA polymerase Rpb1 repeat domain protein	JH921460	MBM_09526	K1W5N7	GI:597588717|GI:406859136|EMBL-CDS:EKD12205.1|REFSEQ:XP_007297415.1	#FF0000	Marssonina brunnea f. sp. multigermtubi (strain MB_m1)	K1W5N7	350	K1W5N7	Marssonina brunnea f. sp. 'multigermtubi' MB_m1
1	664	Uncharacterized protein	KB456260	SEPMUDRAFT_23351	N1QH45	GI:453088465|GI:1030125535|EMBL-CDS:EMF16505.1|REFSEQ:XP_016764626.1	#FF0000	Sphaerulina musiva (strain SO2202)	N1QH45	226	N1QH45	Sphaerulina musiva SO2202
1	664	Plant lectins/antimicrobial peptide	KE145371	GLAREA_01342	S3CHV1	GI:512196594|GI:636769151|EMBL-CDS:EPE25430.1|REFSEQ:XP_008086749.1	#FF0000	Glarea lozoyensis (strain ATCC 20868 / MF5171)	S3CHV1	313	S3CHV1	Glarea lozoyensis ATCC 20868
1	664	Uncharacterized protein	KN846961	PV04_09048	A0A0D2FB76	GI:759287596|EMBL-CDS:KIW64090.1	#FF0000	Phialophora americana.	A0A0D2FB76	672	A0A0D2FB76	Phialophora americana
1	664	Rhinocladiella mackenziei CBS 650.93 unplaced genomic scaffold supercont1.10| whole genome shotgun sequence	KN847484	Z518_10932	A0A0D2ITH8	GI:759323671|GI:915031359|EMBL-CDS:KIX00005.1|REFSEQ:XP_013266895.1	#FF0000	Rhinocladiella mackenziei CBS 650.93.	A0A0D2ITH8	564	A0A0D2ITH8	Rhinocladiella mackenziei CBS 650.93
1	664	Endoglucanase	JNOM01000286	ANOM_008838	A0A0L1IUE6	GI:910291369|GI:992081160|EMBL-CDS:KNG83191.1|REFSEQ:XP_015404114.1	#FF0000	Aspergillus nomius NRRL 13137.	A0A0L1IUE6	221	A0A0L1IUE6	Aspergillus nomius NRRL 13137
1	664	Uncharacterized protein	JEMN01000059	CNYM01_02079	A0A135UWH9	GI:996643824|EMBL-CDS:KXH64765.1	#FF0000	Colletotrichum nymphaeae SA-01.	A0A135UWH9	670	A0A135UWH9	Colletotrichum nymphaeae SA-01
1	664	Uncharacterized protein	EQ963485	AFLA_118790	B8NVV1	GI:238506769|GI:220689299|EMBL-CDS:EED45650.1|REFSEQ:XP_002384586.1	#FF0000	Aspergillus flavus (strain ATCC 200026 / FGSC A1120 / NRRL 3357 / JCM12722 / SRRC 167)	B8NVV1	222	B8NVV1	Aspergillus flavus NRRL3357
1	664	Endoglucanase	GG704912	CIMG_11853	J3K912	GI:767017679|GI:815885213|EMBL-CDS:EAS31355.3|REFSEQ:XP_001242938.2	#FF0000	Coccidioides immitis (strain RS)	J3K912	214	J3K912	Coccidioides immitis RS
1	664	Uncharacterized protein	CDHN01000003	VHEMI06085	A0A0A1TKA9	EMBL-CDS:CEJ90292.1	#FF0000	Torrubiella hemipterigena.	A0A0A1TKA9	226	A0A0A1TKA9	Torrubiella hemipterigena
1	664	Uncharacterized protein	AZNG01000004	MBR_04168	A0A0B4G139	GI:743645075|GI:953403492|EMBL-CDS:KID76233.1|REFSEQ:XP_014545405.1	#FF0000	Metarhizium brunneum ARSEF 3297.	A0A0B4G139	412	A0A0B4G139	Metarhizium brunneum ARSEF 3297
1	664	Uncharacterized protein	KN847522	PV10_04609	A0A0D1XYT4	GI:1022631395|GI:759216057|EMBL-CDS:KIV93396.1|REFSEQ:XP_016224970.1	#FF0000	Exophiala mesophila.	A0A0D1XYT4	326	A0A0D1XYT4	Exophiala mesophila
1	664	Unplaced genomic scaffold supercont1.3| whole genome shotgun sequence	KN846971	Z517_05251	A0A0D2HCF3	GI:759305819|GI:915103011|EMBL-CDS:KIW82224.1|REFSEQ:XP_013286032.1	#FF0000	Fonsecaea pedrosoi CBS 271.37.	A0A0D2HCF3	500	A0A0D2HCF3	Fonsecaea pedrosoi CBS 271.37
1	664	Neuraminidase	AZHA01000121	BBO_09542	A0A162IJM2	GI:1024755423|EMBL-CDS:KZZ94423.1	#FF0000	Cordyceps brongniartii RCEF 3172.	A0A162IJM2	223	A0A162IJM2	Cordyceps brongniartii RCEF 3172
1	664	Endoglucanase	AZGY01000022	AAL_07366	A0A167XMX5	GI:1024751220|EMBL-CDS:KZZ90265.1	#FF0000	Moelleriella libera RCEF 2490.	A0A167XMX5	309	A0A167XMX5	Moelleriella libera RCEF 2490
1	664	Uncharacterized protein	MPGH01000270	CCHL11_10378	A0A1Q8R9C5	GI:1128251766|EMBL-CDS:OLN80952.1	#FF0000	Colletotrichum chlorophyti.	A0A1Q8R9C5	429	A0A1Q8R9C5	Colletotrichum chlorophyti
1	664	Uncharacterized protein	LN890956	GSTUAT00001211001	A0A292Q4G1	EMBL-CDS:CUS14686.1	#FF0000	Tuber aestivum	A0A292Q4G1	287	A0A292Q4G1	Tuber aestivum
1	664	Endoglucanase	NEXV01000244	AARAC_002080	A0A2G7G127	EMBL-CDS:PIG86560.1	#FF0000	Aspergillus arachidicola.	A0A2G7G127	222	A0A2G7G127	Aspergillus arachidicola
1	664	Uncharacterized protein	LFMI01000866	A9Z42_0003260	A0A2H2ZVA2	GI:1190651800|EMBL-CDS:OTA08612.1	#FF0000	Trichoderma parareesei.	A0A2H2ZVA2	190	A0A2H2ZVA2	Trichoderma parareesei
1	664	Uncharacterized protein	MRVG01000002	BM221_002103	A0A2N6NXK5	EMBL-CDS:PMB72005.1	#FF0000	Beauveria bassiana	A0A2N6NXK5	211	A0A2N6NXK5	Beauveria bassiana
1	664	Endoglucanase	JZDT01000919	AFLA70_4g008091	A0A2P2HV15	GI:914764918|EMBL-CDS:KOC18727.1	#FF0000	Aspergillus flavus (strain ATCC MYA-384 / AF70)	A0A2P2HV15	222	A0A2P2HV15	Aspergillus flavus AF70
1	664	Uncharacterized protein	CH476597	ATEG_02877	Q0CTV7	GI:114194451|GI:115389100|EMBL-CDS:EAU36151.1|REFSEQ:XP_001212055.1	#FF0000	Aspergillus terreus (strain NIH 2624 / FGSC A1156)	Q0CTV7	219	Q0CTV7	Aspergillus terreus NIH2624
1	664	Uncharacterized protein	CH408033	CHGG_07518	Q2GWY6	GI:88178797|GI:116198725|EMBL-CDS:EAQ86265.1|REFSEQ:XP_001225174.1	#FF0000	Chaetomium globosum (strain ATCC 6205 / CBS 148.51 / DSM 1962 / NBRC6347 / NRRL 1970)	Q2GWY6	326	Q2GWY6	Chaetomium globosum CBS 148.51
1	664	Uncharacterized protein	JH767570	W97_04002	R7YSH0	GI:667831834|GI:494827873|EMBL-CDS:EON64769.1|REFSEQ:XP_007780086.1	#FF0000	Coniosporium apollinis (strain CBS 100218)	R7YSH0	438	R7YSH0	Coniosporium apollinis CBS 100218
1	664	Uncharacterized protein	AMGV01000015	A1O9_10922	A0A072NYR3	GI:656907275|GI:915038856|EMBL-CDS:KEF53014.1|REFSEQ:XP_013255604.1	#FF0000	Exophiala aquamarina CBS 119918.	A0A072NYR3	452	A0A072NYR3	Exophiala aquamarina CBS 119918
1	664	Uncharacterized protein	LVKK01000098	AYO21_09639	A0A177EXR0	GI:1027215138|EMBL-CDS:OAG36171.1	#FF0000	Fonsecaea monophora.	A0A177EXR0	556	A0A177EXR0	Fonsecaea monophora
1	664	Uncharacterized protein	MRVG01000017	BM221_010490	A0A2N6N915	EMBL-CDS:PMB63748.1	#FF0000	Beauveria bassiana	A0A2N6N915	223	A0A2N6N915	Beauveria bassiana
1	664	Uncharacterized protein	EQ962652	TSTA_062040	B8LX66	GI:218723299|GI:242761036|EMBL-CDS:EED22716.1|REFSEQ:XP_002340103.1	#FF0000	Talaromyces stipitatus (strain ATCC 10500 / CBS 375.48 / QM 6759 /NRRL 1006)	B8LX66	197	B8LX66	Talaromyces stipitatus ATCC 10500
1	664	Uncharacterized protein	HF935386	PCON_07585	U4L6D9	GI:549053090|EMBL-CDS:CCX07996.1	#FF0000	Pyronema omphalodes (strain CBS 100304)	U4L6D9	323	U4L6D9	Pyronema omphalodes CBS 100304
1	664	Uncharacterized protein	JPJY01000175	V496_01266	A0A094DNZ1	GI:682386254|EMBL-CDS:KFY68146.1	#FF0000	Pseudogymnoascus sp. VKM F-4515	A0A094DNZ1	247	A0A094DNZ1	Pseudogymnoascus sp. VKM F-4515 (FW-2607)
1	664	Uncharacterized protein	AZNF01000001	MAN_01009	A0A0B4FBC3	GI:743640043|EMBL-CDS:KID71410.1	#FF0000	Metarhizium anisopliae ARSEF 549.	A0A0B4FBC3	397	A0A0B4FBC3	Metarhizium anisopliae ARSEF 549
1	664	Uncharacterized protein	KE384744	H634G_08347	A0A0D9NRB7	GI:770390463|EMBL-CDS:KJK76456.1	#FF0000	Metarhizium anisopliae BRIP 53293.	A0A0D9NRB7	397	A0A0D9NRB7	Metarhizium anisopliae BRIP 53293
1	664	Uncharacterized protein	JZEE01000194	P875_00117203	A0A0F0IJU8	GI:770310483|EMBL-CDS:KJK67426.1	#FF0000	Aspergillus parasiticus (strain ATCC 56775 / NRRL 5862 / SRRC 143 /SU-1)	A0A0F0IJU8	222	A0A0F0IJU8	Aspergillus parasiticus SU-1
1	664	Uncharacterized protein	LKCW01000176	AK830_g9444	A0A0N8H5U3	GI:936408283|EMBL-CDS:KPM37132.1	#FF0000	Neonectria ditissima.	A0A0N8H5U3	309	A0A0N8H5U3	Neonectria ditissima
1	664	Extracellular protein	LTAN01000009	CH63R_12674	A0A1B7XUU4	GI:1039265271|GI:1069509172|EMBL-CDS:OBR03547.1|REFSEQ:XP_018152065.1	#FF0000	Colletotrichum higginsianum (strain IMI 349063)	A0A1B7XUU4	436	A0A1B7XUU4	Colletotrichum higginsianum IMI 349063
1	664	Uncharacterized protein	LGRB01000020	CLCR_05579	A0A1C1C8E8	GI:1050180147|EMBL-CDS:OCT44790.1	#FF0000	Cladophialophora carrionii.	A0A1C1C8E8	683	A0A1C1C8E8	Cladophialophora carrionii
1	664	Uncharacterized protein	MKZY01000006	OAory_01040850	A0A1S9DEV0	GI:1150472818|EMBL-CDS:OOO07585.1	#FF0000	Aspergillus oryzae	A0A1S9DEV0	222	A0A1S9DEV0	Aspergillus oryzae
1	664	Endoglucanase| putative	CP023323	A9K55_006733	A0A2H4SAQ1	GI:1283009464|EMBL-CDS:ATY60186.1	#FF0000	Cordyceps militaris	A0A2H4SAQ1	233	A0A2H4SAQ1	Cordyceps militaris
1	664	Extracellular protein	MAVT02001031	DHEL01_v209305	A0A2P5HPX1	EMBL-CDS:POS72304.1	#FF0000	Diaporthe helianthi.	A0A2P5HPX1	260	A0A2P5HPX1	Diaporthe helianthi
1	664	Uncharacterized protein	CP003009	THITE_2038036	G2QW76	GI:367038013|GI:346996648|EMBL-CDS:AEO63051.1|REFSEQ:XP_003649387.1	#FF0000	Thielavia terrestris (strain ATCC 38088 / NRRL 8126)	G2QW76	310	G2QW76	Thielavia terrestris NRRL 8126
1	664	Endoglucanase| putative	JH126400	CCM_02169	G3J857	GI:573978880|GI:346324302|EMBL-CDS:EGX93899.1|REFSEQ:XP_006667385.1	#FF0000	Cordyceps militaris (strain CM01)	G3J857	233	G3J857	Cordyceps militaris CM01
1	664	DNA-directed RNA polymerase	JH226135	HMPREF1120_07265	H6C6C7	GI:378732814|GI:684171729|EMBL-CDS:EHY59273.1|REFSEQ:XP_009159734.1	#FF0000	Exophiala dermatitidis (strain ATCC 34100 / CBS 525.76 / NIH/UT8656)	H6C6C7	522	H6C6C7	Exophiala dermatitidis NIH/UT8656
1	664	Uncharacterized protein	JELW01000005	X797_004460	A0A0A1UY91	GI:594719441|EMBL-CDS:EXV02331.1	#FF0000	Metarhizium robertsii.	A0A0A1UY91	445	A0A0A1UY91	Metarhizium robertsii
1	664	Uncharacterized protein	AZNH01000014	MGU_05094	A0A0B4HDC8	GI:743660618|EMBL-CDS:KID87856.1	#FF0000	Metarhizium guizhouense ARSEF 977.	A0A0B4HDC8	442	A0A0B4HDC8	Metarhizium guizhouense ARSEF 977
1	664	Uncharacterized protein	AZNE01000020	MAJ_05048	A0A0B4HUP1	GI:743672022|GI:953468945|EMBL-CDS:KID98953.1|REFSEQ:XP_014577947.1	#FF0000	Metarhizium majus ARSEF 297.	A0A0B4HUP1	367	A0A0B4HUP1	Metarhizium majus ARSEF 297
1	664	Uncharacterized protein	KN847497	PV08_08042	A0A0D2B2L7	GI:1022818107|GI:759235909|EMBL-CDS:KIW12855.1|REFSEQ:XP_016233071.1	#FF0000	Exophiala spinifera.	A0A0D2B2L7	730	A0A0D2B2L7	Exophiala spinifera
1	664	Uncharacterized protein	KN847040	PV07_00785	A0A0D2B8L4	GI:759257315|GI:1022857815|EMBL-CDS:KIW33977.1|REFSEQ:XP_016254193.1	#FF0000	Cladophialophora immunda.	A0A0D2B8L4	589	A0A0D2B8L4	Cladophialophora immunda
1	664	RNA polymerase Rpb1 repeat domain protein	AZGY01000017	AAL_06535	A0A167YUP4	GI:1024752756|EMBL-CDS:KZZ91781.1	#FF0000	Moelleriella libera RCEF 2490.	A0A167YUP4	383	A0A167YUP4	Moelleriella libera RCEF 2490
1	664	Putative extracellular protein	DF977450	SAMD00023353_0500700	A0A1S7UK76	GI:949393214|EMBL-CDS:GAP83678.1	#FF0000	Rosellinia necatrix	A0A1S7UK76	435	A0A1S7UK76	Rosellinia necatrix
1	664	Uncharacterized protein	KZ613952	L207DRAFT_436158	A0A2J6RAN3	EMBL-CDS:PMD35565.1	#FF0000	Meliniomyces variabilis F.	A0A2J6RAN3	198	A0A2J6RAN3	Meliniomyces variabilis F
1	664	Uncharacterized protein	ADNJ02000004	MAA_03069	E9ET75	GI:734840401|GI:761846552|EMBL-CDS:EFZ01840.2|REFSEQ:XP_007819258.2	#FF0000	Metarhizium robertsii (strain ARSEF 23 / ATCC MYA-3075)	E9ET75	412	E9ET75	Metarhizium robertsii ARSEF 23
1	664	Uncharacterized protein	CM001233	MGG_04880	G4N2P9	GI:351644693|GI:389629416|EMBL-CDS:EHA52554.1|REFSEQ:XP_003712361.1	#FF0000	Magnaporthe oryzae (strain 70-15 / ATCC MYA-4617 / FGSC 8958)	G4N2P9	326	G4N2P9	Magnaporthe oryzae 70-15
1	664	Endoglucanase	GL385400	GGTG_10417	J3PA91	GI:402075734|GI:685415398|EMBL-CDS:EJT71157.1|REFSEQ:XP_009226554.1	#FF0000	Gaeumannomyces graminis var. tritici (strain R3-111a-1)	J3PA91	454	J3PA91	Gaeumannomyces tritici R3-111a-1
1	664	Uncharacterized protein	JH793093	OOU_Y34scaffold00745g45	L7HV33	GI:440465450|EMBL-CDS:ELQ34770.1	#FF0000	Magnaporthe oryzae (strain Y34)	L7HV33	326	L7HV33	Magnaporthe oryzae Y34
1	664	Uncharacterized protein	JH795166	OOW_P131scaffold00314g17	L7JHX8	GI:440487669|EMBL-CDS:ELQ67444.1	#FF0000	Magnaporthe oryzae (strain P131)	L7JHX8	326	L7JHX8	Magnaporthe oryzae P131
1	664	Uncharacterized protein	KN847336	PV06_06436	A0A0D2DKM0	GI:1022883526|GI:759266418|EMBL-CDS:KIW42940.1|REFSEQ:XP_016263156.1	#FF0000	Exophiala oligosperma.	A0A0D2DKM0	664	A0A0D2DKM0	Exophiala oligosperma
1	664	Related to spore coat protein SP96	FJOG01000002	PAC_02132	A0A1L7WHL0	EMBL-CDS:CZR52255.1	#FF0000	Phialocephala subalpina.	A0A1L7WHL0	398	A0A1L7WHL0	Phialocephala subalpina
1	664	Uncharacterized protein	ALBS01000038	A1Q1_06771	J4UJK1	GI:930418045|GI:401887996|EMBL-CDS:EJT51965.1|REFSEQ:XP_014183295.1	#FF0000	Trichosporon asahii var. asahii (strain ATCC 90039 / CBS 2479 / JCM2466 / KCTC 7840 / NCYC 2677 / UAMH 7654)	J4UJK1	363	J4UJK1	Trichosporon asahii var. asahii CBS 2479
1	664	Uncharacterized protein	AMBO01000280	A1Q2_03172	K1VPM9	GI:406699371|EMBL-CDS:EKD02576.1	#FF0000	Trichosporon asahii var. asahii (strain CBS 8904)	K1VPM9	363	K1VPM9	Trichosporon asahii var. asahii CBS 8904
1	664	Putative extracellular protein	KB707597	UCREL1_11556	M7SVA3	GI:471559008|GI:629675798|EMBL-CDS:EMR61516.1|REFSEQ:XP_007799396.1	#FF0000	Eutypa lata (strain UCR-EL1)	M7SVA3	228	M7SVA3	Eutypa lata UCREL1
1	664	Uncharacterized protein	AZNE01000035	MAJ_06716	A0A0B4I3L9	GI:953465721|GI:743670395|EMBL-CDS:KID97341.1|REFSEQ:XP_014576335.1	#FF0000	Metarhizium majus ARSEF 297.	A0A0B4I3L9	223	A0A0B4I3L9	Metarhizium majus ARSEF 297
1	664	Unplaced genomic scaffold supercont1.2| whole genome shotgun sequence	KN846981	Z519_01776	A0A0D2GIJ1	GI:759321850|GI:1026977576|EMBL-CDS:KIW98192.1|REFSEQ:XP_016624861.1	#FF0000	Cladophialophora bantiana CBS 173.52.	A0A0D2GIJ1	529	A0A0D2GIJ1	Cladophialophora bantiana CBS 173.52
1	664	Uncharacterized protein	KN848065	Z520_02784	A0A0D2IW01	GI:1026983708|GI:761340302|EMBL-CDS:KIY01232.1|REFSEQ:XP_016635354.1	#FF0000	Fonsecaea multimorphosa CBS 102226.	A0A0D2IW01	596	A0A0D2IW01	Fonsecaea multimorphosa CBS 102226
1	664	Extracellular protein	AZHB01000026	ISF_08116	A0A162ICL4	GI:1089743034|GI:1025667814|EMBL-CDS:OAA55195.1|REFSEQ:XP_018701205.1	#FF0000	Cordyceps fumosorosea ARSEF 2679.	A0A162ICL4	235	A0A162ICL4	Cordyceps fumosorosea ARSEF 2679
1	664	Uncharacterized protein	LVYI01000007	AYL99_08077	A0A178ZC44	GI:1032428899|GI:1089697646|EMBL-CDS:OAP57339.1|REFSEQ:XP_018690706.1	#FF0000	Fonsecaea erecta.	A0A178ZC44	773	A0A178ZC44	Fonsecaea erecta
1	664	Uncharacterized protein	KN714711	VP1G_05559	A0A194V304	GI:972129615|EMBL-CDS:KUI58317.1	#FF0000	Valsa mali var. pyri.	A0A194V304	387	A0A194V304	Valsa mali var. pyri
1	664	Extracellular protein	CP023324	A9K55_008918	A0A2H4SK94	GI:1283012808|EMBL-CDS:ATY63528.1	#FF0000	Cordyceps militaris	A0A2H4SK94	232	A0A2H4SK94	Cordyceps militaris
1	664	Uncharacterized protein	CH476616	UREG_03224	C4JPQ2	GI:258569807|GI:237903977|EMBL-CDS:EEP78378.1|REFSEQ:XP_002543707.1	#FF0000	Uncinocarpus reesii (strain UAMH 1704)	C4JPQ2	241	C4JPQ2	Uncinocarpus reesii 1704
1	664	Putative extracellular protein	KB706249	UCREL1_4604	M7TEM1	GI:471568836|GI:629655335|EMBL-CDS:EMR68381.1|REFSEQ:XP_007792519.1	#FF0000	Eutypa lata (strain UCR-EL1)	M7TEM1	438	M7TEM1	Eutypa lata UCREL1
1	664	Uncharacterized protein	AMYD01001490	CGLO_07413	T0KJ89	GI:530472286|EMBL-CDS:EQB52923.1	#FF0000	Colletotrichum gloeosporioides (strain Cg-14)	T0KJ89	435	T0KJ89	Colletotrichum gloeosporioides Cg-14
1	664	Uncharacterized protein	AMGX01000002	A1O5_01641	W9XCA2	GI:589992363|GI:628306286|EMBL-CDS:EXJ74945.1|REFSEQ:XP_007740447.1	#FF0000	Cladophialophora psammophila CBS 110553.	W9XCA2	571	W9XCA2	Cladophialophora psammophila CBS 110553
1	664	Endoglucanase	GL876980	MAPG_11274	A0A0C4EEU3	GI:835901129|EMBL-CDS:-|EMBL-CDS:KLU92328.1	#FF0000	Magnaporthiopsis poae (strain ATCC 64411 / 73-15)	A0A0C4EEU3	303	A0A0C4EEU3	Magnaporthiopsis poae ATCC 64411
1	664	Uncharacterized protein	KN847317	PV05_00932	A0A0D2EYC6	GI:759284236|GI:915192255|EMBL-CDS:KIW60738.1|REFSEQ:XP_013321322.1	#FF0000	Exophiala xenobiotica.	A0A0D2EYC6	635	A0A0D2EYC6	Exophiala xenobiotica
1	664	Extracellular protein	LFIW01000073	CI238_04909	A0A162Q6Y5	GI:1020459494|GI:1093045085|EMBL-CDS:KZL88141.1|EMBL-CDS:OHW97185.1	#FF0000	Colletotrichum incanum.	A0A162Q6Y5	435	A0A162Q6Y5	Colletotrichum incanum
1	664	Extracellular protein	KB021234	CGGC5_13877	L2FFQ9	GI:596720332|GI:429849461|EMBL-CDS:ELA24851.1|REFSEQ:XP_007286102.1	#FF0000	Colletotrichum gloeosporioides (strain Nara gc5)	L2FFQ9	401	L2FFQ9	Colletotrichum gloeosporioides Nara gc5
1	664	Uncharacterized protein	KI912114	PFICI_08777	W3WYR5	GI:630025685|GI:573059126|EMBL-CDS:ETS78924.1|REFSEQ:XP_007835549.1	#FF0000	Pestalotiopsis fici (strain W106-1 / CGMCC3.15140)	W3WYR5	508	W3WYR5	Pestalotiopsis fici W106-1
1	664	Uncharacterized protein	AMWN01000002	A1O1_02767	W9YPC3	GI:590019174|GI:628230360|EMBL-CDS:EXJ94373.1|REFSEQ:XP_007721867.1	#FF0000	Capronia coronata CBS 617.96.	W9YPC3	528	W9YPC3	Capronia coronata CBS 617.96
1	664	Uncharacterized protein	JFBX01000632	CSIM01_08044	A0A135S9V7	GI:996588746|EMBL-CDS:KXH32679.1	#FF0000	Colletotrichum simmondsii.	A0A135S9V7	672	A0A135S9V7	Colletotrichum simmondsii
1	664	Extracellular protein	LFIV01000103	CT0861_09253	A0A166RU07	GI:1020433772|EMBL-CDS:KZL69733.1	#FF0000	Colletotrichum tofieldiae.	A0A166RU07	439	A0A166RU07	Colletotrichum tofieldiae
1	664	Uncharacterized protein	KQ947411	LY89DRAFT_535852	A0A194XGT3	GI:1069173356|GI:972542792|EMBL-CDS:KUJ19410.1|REFSEQ:XP_018073765.1	#FF0000	Phialocephala scopiformis.	A0A194XGT3	273	A0A194XGT3	Phialocephala scopiformis
1	664	Endoglucanase	LYCR01000007	ABOM_001888	A0A1F8ADG2	GI:1084344089|EMBL-CDS:OGM49722.1	#FF0000	Aspergillus bombycis.	A0A1F8ADG2	250	A0A1F8ADG2	Aspergillus bombycis
1	664	Uncharacterized protein		None	A0A1Y1LT34	EMBL-CDS:JAV76813.1	#FF0000	Photinus pyralis	A0A1Y1LT34	397	A0A1Y1LT34	Photinus pyralis
1	664	Uncharacterized protein	NLAX01000004	jhhlp_001267	A0A2N3NHU3	EMBL-CDS:PKS11971.1	#FF0000	Lomentospora prolificans.	A0A2N3NHU3	433	A0A2N3NHU3	Lomentospora prolificans
1	664	Uncharacterized protein	FN429986	GSTUM_00003986001	D5G479	GI:295627976|GI:296410956|EMBL-CDS:CAZ79322.1|REFSEQ:XP_002835201.1	#FF0000	Tuber melanosporum (strain Mel28)	D5G479	308	D5G479	Tuber melanosporum Mel28
1	664	Uncharacterized protein	JPKA01004064	V498_09337	A0A094EM01	GI:682400399|EMBL-CDS:KFY77433.1	#FF0000	Pseudogymnoascus sp. VKM F-4517	A0A094EM01	228	A0A094EM01	Pseudogymnoascus sp. VKM F-4517 (FW-2822)
1	664	Uncharacterized protein	AMGY01000004	A1O3_05343	W9XWR2	GI:590009467|GI:628297116|EMBL-CDS:EXJ84673.1|REFSEQ:XP_007733658.1	#FF0000	Capronia epimyces CBS 606.96.	W9XWR2	421	W9XWR2	Capronia epimyces CBS 606.96
1	664	Uncharacterized protein	JPKB01000014	V499_00137	A0A094FAU7	GI:682405669|EMBL-CDS:KFY81080.1	#FF0000	Pseudogymnoascus sp. VKM F-103.	A0A094FAU7	229	A0A094FAU7	Pseudogymnoascus sp. VKM F-103
1	664	Uncharacterized protein	JPKD01002917	V501_09311	A0A094J4A2	GI:682440364|EMBL-CDS:KFZ03768.1	#FF0000	Pseudogymnoascus sp. VKM F-4519	A0A094J4A2	229	A0A094J4A2	Pseudogymnoascus sp. VKM F-4519 (FW-2642)
1	664	Uncharacterized protein	LGSR01000022	ESCO_002870	A0A0M9VSU7	GI:924820142|EMBL-CDS:KOS18099.1	#FF0000	Escovopsis weberi.	A0A0M9VSU7	338	A0A0M9VSU7	Escovopsis weberi
1	664	Uncharacterized protein	KQ964262	Micbo1qcDRAFT_208177	A0A136IRI9	GI:1000218545|EMBL-CDS:KXJ87562.1	#FF0000	Microdochium bolleyi.	A0A136IRI9	233	A0A136IRI9	Microdochium bolleyi
1	664	Uncharacterized protein	LVCJ01000036	AYO20_06008	A0A178D0A3	GI:1029157811|EMBL-CDS:OAL34813.1	#FF0000	Fonsecaea nubica.	A0A178D0A3	520	A0A178D0A3	Fonsecaea nubica
1	664	Uncharacterized protein	KV875099	CONLIGDRAFT_443795	A0A1J7JJ49	GI:1102745143|EMBL-CDS:OIW27666.1	#FF0000	Coniochaeta ligniaria NRRL 30616.	A0A1J7JJ49	471	A0A1J7JJ49	Coniochaeta ligniaria NRRL 30616
1	664	Uncharacterized protein	AKHY01000175	Ao3042_08433	I7ZTY4	GI:391866222|EMBL-CDS:EIT75494.1	#FF0000	Aspergillus oryzae (strain 3.042)	I7ZTY4	201	I7ZTY4	Aspergillus oryzae 3.042
1	664	Extracellular protein	KB725990	Cob_01285	N4VCX9	GI:477528435|EMBL-CDS:ENH80220.1	#FF0000	Colletotrichum orbiculare (strain 104-T / ATCC 96160 / CBS 514.97 /LARS 414 / MAFF 240422)	N4VCX9	444	N4VCX9	Colletotrichum orbiculare MAFF 240422
1	664	Uncharacterized protein	JPJR01000275	O988_01704	A0A093YDG2	GI:682282190|EMBL-CDS:KFY03091.1	#FF0000	Pseudogymnoascus sp. VKM F-3808.	A0A093YDG2	229	A0A093YDG2	Pseudogymnoascus sp. VKM F-3808
1	664	Uncharacterized protein	JPJZ01000057	V497_00461	A0A094DT41	GI:682385257|EMBL-CDS:KFY67348.1	#FF0000	Pseudogymnoascus sp. VKM F-4516	A0A094DT41	237	A0A094DT41	Pseudogymnoascus sp. VKM F-4516 (FW-969)
1	664	Uncharacterized protein	LGSR01000006	ESCO_001676	A0A0M8N879	GI:924824050|EMBL-CDS:KOS21991.1	#FF0000	Escovopsis weberi.	A0A0M8N879	457	A0A0M8N879	Escovopsis weberi
1	664	Uncharacterized protein	LFJN01000016	AB675_4656	A0A0N0NLG6	GI:1063878204|GI:930440454|EMBL-CDS:KPI39019.1|REFSEQ:XP_017998982.1	#FF0000	Phialophora attae.	A0A0N0NLG6	289	A0A0N0NLG6	Phialophora attae
1	664	Uncharacterized protein	KV454569	VE00_01427	A0A1B8CNL6	GI:1040506663|EMBL-CDS:OBT48428.1	#FF0000	Pseudogymnoascus sp. WSF 3629.	A0A1B8CNL6	229	A0A1B8CNL6	Pseudogymnoascus sp. WSF 3629
1	664	Uncharacterized protein	LN891180	GSTUAT00008185001	A0A292PM05	EMBL-CDS:CUS07725.1	#FF0000	Tuber aestivum	A0A292PM05	377	A0A292PM05	Tuber aestivum
1	664	Uncharacterized protein	AP007175	AO090010000387	Q2TWW4	GI:83776140|EMBL-CDS:BAE66259.1	#FF0000	Aspergillus oryzae (strain ATCC 42149 / RIB 40)	Q2TWW4	201	Q2TWW4	Aspergillus oryzae RIB40
1	664	Uncharacterized protein	KQ964245	Micbo1qcDRAFT_156294	A0A136JJU0	GI:1000228419|EMBL-CDS:KXJ97419.1	#FF0000	Microdochium bolleyi.	A0A136JJU0	430	A0A136JJU0	Microdochium bolleyi
1	664	Extracellular protein	JARH01000269	CFIO01_01263	A0A010SDT7	GI:615446551|GI:588902657|EMBL-CDS:EXF82893.1|REFSEQ:XP_007593400.1	#FF0000	Colletotrichum fioriniae PJ7.	A0A010SDT7	269	A0A010SDT7	Colletotrichum fioriniae PJ7
1	664	Uncharacterized protein	JPJS01000227	V490_00723	A0A093YGR3	GI:682280618|EMBL-CDS:KFY01903.1	#FF0000	Pseudogymnoascus sp. VKM F-3557.	A0A093YGR3	237	A0A093YGR3	Pseudogymnoascus sp. VKM F-3557
1	664	Uncharacterized protein	JPJV01000438	V493_01229	A0A094APL2	GI:682333097|EMBL-CDS:KFY31304.1	#FF0000	Pseudogymnoascus sp. VKM F-4281	A0A094APL2	229	A0A094APL2	Pseudogymnoascus sp. VKM F-4281 (FW-2241)
1	664	Uncharacterized protein	LFJN01000004	AB675_6116	A0A0N1HEB0	GI:930445152|GI:1063867842|EMBL-CDS:KPI43705.1|REFSEQ:XP_018003668.1	#FF0000	Phialophora attae.	A0A0N1HEB0	445	A0A0N1HEB0	Phialophora attae
1	664	Uncharacterized protein	KV456099	VE04_03815	A0A1B8DC10	GI:1040517593|EMBL-CDS:OBT56674.1	#FF0000	Pseudogymnoascus sp. 24MN13.	A0A1B8DC10	233	A0A1B8DC10	Pseudogymnoascus sp. 24MN13
1	664	Uncharacterized protein	JPKC01002834	V500_10055	A0A094EY51	GI:682410694|EMBL-CDS:KFY83454.1	#FF0000	Pseudogymnoascus sp. VKM F-4518	A0A094EY51	196	A0A094EY51	Pseudogymnoascus sp. VKM F-4518 (FW-2643)
1	664	Uncharacterized protein	AZHD01000018	SPI_08050	A0A167NRQ4	GI:1025668472|EMBL-CDS:OAA55843.1	#FF0000	Sporothrix insectorum RCEF 264.	A0A167NRQ4	378	A0A167NRQ4	Sporothrix insectorum RCEF 264
1	664	Uncharacterized protein	KB822719	HMPREF1541_03923	W2S208	GI:568119377|GI:671155782|EMBL-CDS:ETN41984.1|REFSEQ:XP_008716493.1	#FF0000	Cyphellophora europaea CBS 101466.	W2S208	588	W2S208	Cyphellophora europaea CBS 101466
1	664	Uncharacterized protein	KV441391	VC83_03558	A0A177AFD7	GI:1026908342|EMBL-CDS:OAF60540.1	#FF0000	Pseudogymnoascus destructans.	A0A177AFD7	228	A0A177AFD7	Pseudogymnoascus destructans
1	664	Uncharacterized protein	GL573217	GMDG_03199	L8G558	GI:440638491|GI:831343525|EMBL-CDS:ELR08410.1|REFSEQ:XP_012741613.1	#FF0000	Pseudogymnoascus destructans (strain ATCC MYA-4855 / 20631-21)	L8G558	214	L8G558	Pseudogymnoascus destructans 20631-21
1	664	Uncharacterized protein	LVCI01000036	AYO22_02705	A0A178CFW0	GI:1029151752|EMBL-CDS:OAL28840.1	#FF0000	Fonsecaea multimorphosa.	A0A178CFW0	572	A0A178CFW0	Fonsecaea multimorphosa
1	664	Uncharacterized protein	BDMC01000037	ANO14919_103360	A0A1V1TIW1	EMBL-CDS:GAW20825.1	#FF0000	fungal sp. No.14919.	A0A1V1TIW1	399	A0A1V1TIW1	fungal sp. No.14919
1	664	Uncharacterized protein	JPJU01000020	V492_00112	A0A093ZSX6	GI:682309562|EMBL-CDS:KFY18143.1	#FF0000	Pseudogymnoascus sp. VKM F-4246.	A0A093ZSX6	203	A0A093ZSX6	Pseudogymnoascus sp. VKM F-4246
1	664	Extracellular protein	LAYC01000001	DCS_02414	A0A151GW65	GI:1008938288|EMBL-CDS:KYK61272.1	#FF0000	Drechmeria coniospora.	A0A151GW65	373	A0A151GW65	Drechmeria coniospora
1	664	Extracellular protein	GG697366	GLRG_08089	E3QQ08	GI:310798052|GI:827070998|EMBL-CDS:EFQ32945.1|REFSEQ:XP_008096965.1	#FF0000	Colletotrichum graminicola (strain M1.001 / M2 / FGSC 10212)	E3QQ08	419	E3QQ08	Colletotrichum graminicola M1.001
1	664	Uncharacterized protein	JH793404	OOU_Y34scaffold00649g27	L7I0A8	GI:440467420|EMBL-CDS:ELQ36644.1	#FF0000	Magnaporthe oryzae (strain Y34)	L7I0A8	471	L7I0A8	Magnaporthe oryzae Y34
1	664	Endoglucanase	CM001231	MGG_11774	G4MPB3	GI:389624249|GI:351649307|EMBL-CDS:EHA57166.1|REFSEQ:XP_003709778.1	#FF0000	Magnaporthe oryzae (strain 70-15 / ATCC MYA-4617 / FGSC 8958)	G4MPB3	427	G4MPB3	Magnaporthe oryzae 70-15
1	664	Extracellular protein	MJBS01000054	CORC01_06941	A0A1G4B8T6	GI:1088689388|EMBL-CDS:OHE97736.1	#FF0000	Colletotrichum orchidophilum.	A0A1G4B8T6	274	A0A1G4B8T6	Colletotrichum orchidophilum
1	664	Carbohydrate-Binding Module family 18 protein	MZNU01000276	B2J93_723	A0A218Z094	GI:1209030256|EMBL-CDS:OWP01491.1	#FF0000	Marssonina coronariae.	A0A218Z094	342	A0A218Z094	Marssonina coronariae
1	664	Uncharacterized protein	CP003008	MYCTH_2312852	G2QNB8	GI:347014509|GI:367035908|EMBL-CDS:AEO61991.1|REFSEQ:XP_003667236.1	#FF0000	Myceliophthora thermophila (strain ATCC 42464 / BCRC 31852 / DSM 1799)	G2QNB8	418	G2QNB8	Thermothelomyces thermophila ATCC 42464
1	664	Uncharacterized protein	JPJW01000942	V494_02764	A0A094E3Y1	GI:682349833|EMBL-CDS:KFY41812.1	#FF0000	Pseudogymnoascus sp. VKM F-4513	A0A094E3Y1	223	A0A094E3Y1	Pseudogymnoascus sp. VKM F-4513 (FW-928)
1	664	Uncharacterized protein	FN430161	GSTUM_00001182001	D5GE18	GI:296417867|GI:295634517|EMBL-CDS:CAZ82761.1|REFSEQ:XP_002838570.1	#FF0000	Tuber melanosporum (strain Mel28)	D5GE18	1208	D5GE18	Tuber melanosporum Mel28
1	664	Uncharacterized protein	JH794722	OOW_P131scaffold00255g13	L7JJA6	GI:440488595|EMBL-CDS:ELQ68311.1	#FF0000	Magnaporthe oryzae (strain P131)	L7JJA6	452	L7JJA6	Magnaporthe oryzae P131
1	664	Uncharacterized protein	KB822711	HMPREF1541_01387	W2SEN5	GI:671145095|GI:568124611|EMBL-CDS:ETN47196.1|REFSEQ:XP_008711908.1	#FF0000	Cyphellophora europaea CBS 101466.	W2SEN5	311	W2SEN5	Cyphellophora europaea CBS 101466
1	664	Uncharacterized protein	KV441394	VC83_04250	A0A177AB91	GI:1026907176|EMBL-CDS:OAF59377.1	#FF0000	Pseudogymnoascus destructans.	A0A177AB91	214	A0A177AB91	Pseudogymnoascus destructans
1	664	Uncharacterized protein	KV457376	VE04_08804	A0A1B8CTR6	GI:1040509841|EMBL-CDS:OBT50199.1	#FF0000	Pseudogymnoascus sp. 24MN13.	A0A1B8CTR6	396	A0A1B8CTR6	Pseudogymnoascus sp. 24MN13
1	664	Uncharacterized protein	KZ112936	K445DRAFT_46322	A0A1Y2X2X3	GI:1190927571|EMBL-CDS:OTB16295.1	#FF0000	Daldinia sp. EC12.	A0A1Y2X2X3	205	A0A1Y2X2X3	Daldinia sp. EC12
1	664	Uncharacterized protein	JPJU01000898	V492_02939	A0A094BUD0	GI:682302628|EMBL-CDS:KFY13967.1	#FF0000	Pseudogymnoascus sp. VKM F-4246.	A0A094BUD0	293	A0A094BUD0	Pseudogymnoascus sp. VKM F-4246
1	664	Lytic polysaccharide monooxygenase	KZ111263	K449DRAFT_318138	A0A1Y2TIL3	GI:1190864972|EMBL-CDS:OTA57154.1	#FF0000	Hypoxylon sp. EC38.	A0A1Y2TIL3	200	A0A1Y2TIL3	Hypoxylon sp. EC38
1	664	Uncharacterized protein	KZ111552	M426DRAFT_43826	A0A1Y2W5Y4	GI:1190915074|EMBL-CDS:OTB04216.1	#FF0000	Hypoxylon sp. CI-4A.	A0A1Y2W5Y4	240	A0A1Y2W5Y4	Hypoxylon sp. CI-4A
1	664	Glycoside hydrolase family 92	KB725930	Cob_08765	N4VIX7	GI:477530615|EMBL-CDS:ENH82340.1	#FF0000	Colletotrichum orbiculare (strain 104-T / ATCC 96160 / CBS 514.97 /LARS 414 / MAFF 240422)	N4VIX7	695	N4VIX7	Colletotrichum orbiculare MAFF 240422
1	664	Uncharacterized protein	KZ112495	M434DRAFT_58077	A0A1Y2V2E7	GI:1190901575|EMBL-CDS:OTA91711.1	#FF0000	Hypoxylon sp. CO27-5.	A0A1Y2V2E7	205	A0A1Y2V2E7	Hypoxylon sp. CO27-5
1	664	Uncharacterized protein	CACQ02004379	CH063_02459	H1VL08	EMBL-CDS:CCF40911.1	#FF0000	Colletotrichum higginsianum (strain IMI 349063)	H1VL08	161	H1VL08	Colletotrichum higginsianum IMI 349063
1	664	Uncharacterized protein	CVQI01000336	BN1723_008597	A0A0G4KHA7	EMBL-CDS:CRJ94915.1	#FF0000	Verticillium longisporum.	A0A0G4KHA7	734	A0A0G4KHA7	Verticillium longisporum
1	664	Uncharacterized protein	KV878211	ASPWEDRAFT_50808	A0A1L9RS80	GI:1111854933|EMBL-CDS:OJJ37718.1	#FF0000	Aspergillus wentii DTO 134E9.	A0A1L9RS80	360	A0A1L9RS80	Aspergillus wentii DTO 134E9
1	664	Uncharacterized protein	GG663364	HCBG_01499	C0NF33	GI:225561574|EMBL-CDS:EEH09854.1	#FF0000	Ajellomyces capsulatus (strain G186AR / H82 / ATCC MYA-2454 / RMSCC2432)	C0NF33	313	C0NF33	Histoplasma capsulatum G186AR
1	664	Uncharacterized protein	AZHF01000002	LEL_02716	A0A168IG33	GI:1025691948|EMBL-CDS:OAA79230.1	#FF0000	Cordyceps confragosa RCEF 1005.	A0A168IG33	405	A0A168IG33	Cordyceps confragosa RCEF 1005
1	664	Endoglucanase	DS990638	HCEG_03541	F0UGM6	GI:325091016|EMBL-CDS:EGC44326.1	#FF0000	Ajellomyces capsulatus (strain H88)	F0UGM6	343	F0UGM6	Histoplasma capsulatum H88
1	664	Endoglucanase	GG692432	HCDG_07930	C6HNZ9	GI:240274679|EMBL-CDS:EER38195.1	#FF0000	Ajellomyces capsulatus (strain H143)	C6HNZ9	328	C6HNZ9	Histoplasma capsulatum H143
1	664	Uncharacterized protein	LGRN01000181	AJ78_04685	A0A1J9PGC6	GI:1103677931|EMBL-CDS:OJD15030.1	#FF0000	Emergomyces pasteuriana Ep9510.	A0A1J9PGC6	272	A0A1J9PGC6	Emergomyces pasteuriana Ep9510
1	664	WGS project CBMI000000000 data| contig CS3069_c003292	CBMI010003290	BN850_0101460	A0A090MHU3	EMBL-CDS:CEG05225.1	#FF0000	Fusarium sp. FIESC_5 CS3069.	A0A090MHU3	466	A0A090MHU3	Fusarium sp. FIESC_5 CS3069
1	664	DNA-directed RNA polymerase	GG657470	BDBG_08391	A0A179UYG5	GI:1033932272|GI:261189899|EMBL-CDS:OAT13126.1|REFSEQ:XP_002621360.1	#FF0000	Blastomyces gilchristii (strain SLH14081)	A0A179UYG5	301	A0A179UYG5	Blastomyces gilchristii SLH14081
1	664	DNA-directed RNA polymerase	EQ999977	BDCG_04983	C5GKU9	GI:239612876|EMBL-CDS:EEQ89863.1	#FF0000	Ajellomyces dermatitidis (strain ER-3 / ATCC MYA-2586)	C5GKU9	289	C5GKU9	Blastomyces dermatitidis ER-3
1	664	DNA-directed RNA polymerase	GG749423	BDDG_03841	F2TCD7	GI:327352043|EMBL-CDS:EGE80900.1	#FF0000	Ajellomyces dermatitidis (strain ATCC 18188 / CBS 674.68)	F2TCD7	297	F2TCD7	Blastomyces dermatitidis ATCC 18188
1	664	DNA-directed RNA polymerase	PDNC01000113	GX51_06615	A0A2B7WQ93	EMBL-CDS:PGG98756.1	#FF0000	Emmonsia parva.	A0A2B7WQ93	287	A0A2B7WQ93	Emmonsia parva
1	664	Uncharacterized protein	CH476656	HCAG_02427	A6QYH0	GI:150410436|GI:154282921|EMBL-CDS:EDN05824.1|REFSEQ:XP_001542256.1	#FF0000	Ajellomyces capsulatus (strain NAm1 / WU24)	A6QYH0	307	A6QYH0	Histoplasma capsulatum NAm1
1	664	DNA-directed RNA polymerase	GL538363	BDFG_00914	T5C6F4	GI:531987294|EMBL-CDS:EQL37881.1	#FF0000	Blastomyces dermatitidis ATCC 26199.	T5C6F4	289	T5C6F4	Blastomyces dermatitidis ATCC 26199
1	664	Uncharacterized protein	LGTZ01000906	ACJ73_05663	A0A1J9Q2X4	GI:1103687591|EMBL-CDS:OJD22982.1	#FF0000	Blastomyces percursus.	A0A1J9Q2X4	311	A0A1J9Q2X4	Blastomyces percursus
1	664	Uncharacterized protein	KK088418	EURHEDRAFT_350944	A0A017SI76	GI:599157260|EMBL-CDS:EYE96369.1	#FF0000	Aspergillus ruber CBS 135680.	A0A017SI76	383	A0A017SI76	Aspergillus ruber CBS 135680
1	664	DNA-directed RNA polymerase	LDEV01003351	EMPG_10593	A0A0H1B3M7	GI:824361968|EMBL-CDS:KLJ05980.1	#FF0000	Emmonsia parva UAMH 139.	A0A0H1B3M7	283	A0A0H1B3M7	Emmonsia parva UAMH 139
1	664	Uncharacterized protein	AFNW01000097	FPSE_04729	K3VKR1	GI:685858179|GI:408395938|EMBL-CDS:EKJ75109.1|REFSEQ:XP_009256122.1	#FF0000	Fusarium pseudograminearum (strain CS3096)	K3VKR1	460	K3VKR1	Fusarium pseudograminearum CS3096
1	664	Uncharacterized protein	CH476600	ATEG_05070	Q0CML4	GI:114192439|GI:115397313|EMBL-CDS:EAU34139.1|REFSEQ:XP_001214248.1	#FF0000	Aspergillus terreus (strain NIH 2624 / FGSC A1156)	Q0CML4	394	Q0CML4	Aspergillus terreus NIH2624
1	664	Uncharacterized protein	KL584756	AUEXF2481DRAFT_64488	A0A074YEW6	GI:915696419|GI:662539054|EMBL-CDS:KEQ96358.1|REFSEQ:XP_013345054.1	#FF0000	Aureobasidium subglaciale EXF-2481.	A0A074YEW6	213	A0A074YEW6	Aureobasidium subglaciale EXF-2481
1	664	Uncharacterized protein	LYXU01000001	FPOA_00649	A0A1B8B1W8	GI:1040033982|EMBL-CDS:OBS26707.1	#FF0000	Fusarium poae.	A0A1B8B1W8	439	A0A1B8B1W8	Fusarium poae
1	664	Uncharacterized protein	NQOC01000066	FGRA07_07155	A0A2H3FSS7	GI:596544088|EMBL-CDS:PCD18518.1	#FF0000	Gibberella zeae	A0A2H3FSS7	465	A0A2H3FSS7	Fusarium graminearum
1	664	Uncharacterized protein	LN649229	None	A0A2L2TSY8	EMBL-CDS:CEI64310.1	#FF0000	Fusarium venenatum.	A0A2L2TSY8	445	A0A2L2TSY8	Fusarium venenatum
1	664	Uncharacterized protein	HG970332	FGRAMPH1_01T01619	I1RAV3	GI:699041623|GI:758187907|GI:558855766|EMBL-CDS:CEF72610.1|REFSEQ:XP_011316334.1	#FF0000	Gibberella zeae (strain PH-1 / ATCC MYA-4620 / FGSC 9075 / NRRL 31084)	I1RAV3	465	I1RAV3	Fusarium graminearum PH-1
1	664	Uncharacterized protein	JELW01000001	X797_000174	A0A0A1V5M2	GI:594722573|EMBL-CDS:EXV05459.1	#FF0000	Metarhizium robertsii.	A0A0A1V5M2	301	A0A0A1V5M2	Metarhizium robertsii
1	664	Uncharacterized protein	AZNH01000011	MGU_04422	A0A0B4H8V9	GI:743661269|EMBL-CDS:KID88487.1	#FF0000	Metarhizium guizhouense ARSEF 977.	A0A0B4H8V9	292	A0A0B4H8V9	Metarhizium guizhouense ARSEF 977
1	664	Uncharacterized protein	AZNE01000001	MAJ_00485	A0A0B4I6X0	GI:743677041|GI:953478945|EMBL-CDS:KIE03954.1|REFSEQ:XP_014582947.1	#FF0000	Metarhizium majus ARSEF 297.	A0A0B4I6X0	292	A0A0B4I6X0	Metarhizium majus ARSEF 297
1	664	Uncharacterized protein	BCWF01000029	RIB2604_03000840	A0A146FXI1	EMBL-CDS:GAT29553.1	#FF0000	Aspergillus luchuensis.	A0A146FXI1	374	A0A146FXI1	Aspergillus luchuensis
1	664	Uncharacterized protein	LGUA01000339	ACJ72_03439	A0A1B7NZL0	GI:1035640344|EMBL-CDS:OAX82206.1	#FF0000	Emmonsia sp. CAC-2015a.	A0A1B7NZL0	275	A0A1B7NZL0	Emmonsia sp. CAC-2015a
1	664	Uncharacterized protein	KV878889	ASPGLDRAFT_31447	A0A1L9VWK4	GI:1111929048|EMBL-CDS:OJJ88279.1	#FF0000	Aspergillus glaucus CBS 516.65.	A0A1L9VWK4	383	A0A1L9VWK4	Aspergillus glaucus CBS 516.65
1	664	Uncharacterized protein	NIDN01000049	CDV55_02967	A0A229XFQ9	GI:1220583999|GI:1220561784|EMBL-CDS:OXN19056.1|EMBL-CDS:OXN37332.1	#FF0000	Aspergillus turcosus.	A0A229XFQ9	469	A0A229XFQ9	Aspergillus turcosus
1	664	Uncharacterized protein	ADNJ02000001	MAA_01865	E9EPX7	GI:629709660|GI:322710709|EMBL-CDS:EFZ02283.1|REFSEQ:XP_007818054.1	#FF0000	Metarhizium robertsii (strain ARSEF 23 / ATCC MYA-3075)	E9EPX7	301	E9EPX7	Metarhizium robertsii ARSEF 23
1	664	Uncharacterized protein	DF126474	AKAW_08667	G7XUE6	GI:358373958|EMBL-CDS:GAA90553.1	#FF0000	Aspergillus kawachii (strain NBRC 4308)	G7XUE6	374	G7XUE6	Aspergillus kawachii IFO 4308
1	664	Uncharacterized protein	KI911140	M419DRAFT_71162	A0A024SL74	GI:572282684|EMBL-CDS:ETS05698.1	#FF0000	Hypocrea jecorina (strain ATCC 56765 / BCRC 32924 / NRRL 11460 / RutC-30)	A0A024SL74	364	A0A024SL74	Trichoderma reesei RUT C-30
1	664	Uncharacterized protein	AZNG01000002	MBR_02182	A0A0B4HDS2	GI:953408955|GI:743646668|EMBL-CDS:KID77734.1|REFSEQ:XP_014546889.1	#FF0000	Metarhizium brunneum ARSEF 3297.	A0A0B4HDS2	298	A0A0B4HDS2	Metarhizium brunneum ARSEF 3297
1	664	Spore coat protein sp96	JXCE01000015	FLAG1_01756	A0A0N0V882	GI:927762297|EMBL-CDS:KPA45261.1	#FF0000	Fusarium langsethiae.	A0A0N0V882	430	A0A0N0V882	Fusarium langsethiae
1	664	Uncharacterized protein	JXNT01000004	SI65_05163	A0A1E3BGR9	GI:1060924877|EMBL-CDS:ODM20175.1	#FF0000	Aspergillus cristatus.	A0A1E3BGR9	405	A0A1E3BGR9	Aspergillus cristatus
1	664	Uncharacterized protein		AN0602	A0A1U8QXR3	GI:67516641|GI:40747545|EMBL-CDS:EAA66701.1|REFSEQ:XP_658206.1	#FF0000	Emericella nidulans (strain FGSC A4 / ATCC 38163 / CBS 112.46 / NRRL194 / M139)	A0A1U8QXR3	346	A0A1U8QXR3	Aspergillus nidulans FGSC A4
1	664	Uncharacterized protein	LFMY01000009	UA08_06155	A0A225AVJ5	GI:1118538190|GI:1147824492|EMBL-CDS:OKL58455.1|REFSEQ:XP_020118576.1	#FF0000	Talaromyces atroroseus.	A0A225AVJ5	351	A0A225AVJ5	Talaromyces atroroseus
1	664	Uncharacterized protein	NKJJ01000003	CAN33_30795	A0A254UKF1	GI:1213327761|EMBL-CDS:OWW36976.1	#FF0000	Aspergillus niger.	A0A254UKF1	269	A0A254UKF1	Aspergillus niger
1	664	Uncharacterized protein	OGUI01000004	ATCC64974_30820	A0A2K5A094	EMBL-CDS:SPB45442.1	#FF0000	Aspergillus niger.	A0A2K5A094	380	A0A2K5A094	Aspergillus niger
1	664	Aspergillus niger contig An15c0100| genomic contig	AM270337	An15g02350	A2R516	GI:145250521|GI:134082294|EMBL-CDS:CAK42338.1|REFSEQ:XP_001396774.1	#FF0000	Aspergillus niger (strain CBS 513.88 / FGSC A1513)	A2R516	380	A2R516	Aspergillus niger CBS 513.88
1	664	DNA-directed RNA polymerase	EQ999973	BDCG_00239	C5G9A5	GI:239606447|EMBL-CDS:EEQ83434.1	#FF0000	Ajellomyces dermatitidis (strain ER-3 / ATCC MYA-2586)	C5G9A5	213	C5G9A5	Blastomyces dermatitidis ER-3
1	664	Predicted protein	GL985059	TRIREDRAFT_76065	G0RDA9	GI:589102887|GI:340520701|EMBL-CDS:EGR50937.1|REFSEQ:XP_006963466.1	#FF0000	Hypocrea jecorina (strain QM6a)	G0RDA9	364	G0RDA9	Trichoderma reesei QM6a
1	664	Extracellular protein| putative (AFU_orthologue AFUA_6G10930)	BN001308	ANIA_00602	Q5BFS8	GI:67516641|EMBL-CDS:CBF89147.1|REFSEQ:XP_658206.1	#FF0000	Emericella nidulans (strain FGSC A4 / ATCC 38163 / CBS 112.46 / NRRL194 / M139)	Q5BFS8	346	Q5BFS8	Aspergillus nidulans FGSC A4
1	664	DNA-directed RNA polymerase	GL538373	BDFG_02565	T5C1R8	GI:531985391|EMBL-CDS:EQL35978.1	#FF0000	Blastomyces dermatitidis ATCC 26199.	T5C1R8	213	T5C1R8	Blastomyces dermatitidis ATCC 26199
1	664	Uncharacterized protein	BAUL01000054	PVAR5_1947	V5FN28	EMBL-CDS:GAD93338.1	#FF0000	Byssochlamys spectabilis (strain No. 5 / NBRC 109023)	V5FN28	348	V5FN28	Byssochlamys spectabilis No. 5
1	664	Uncharacterized protein	KE384725	H634G_02836	A0A0D9P671	GI:770395602|EMBL-CDS:KJK81576.1	#FF0000	Metarhizium anisopliae BRIP 53293.	A0A0D9P671	296	A0A0D9P671	Metarhizium anisopliae BRIP 53293
1	664	Uncharacterized protein	LHQR01000020	PGRI_081100	A0A135LV54	GI:995940203|EMBL-CDS:KXG52854.1	#FF0000	Penicillium patulum	A0A135LV54	382	A0A135LV54	Penicillium griseofulvum
1	664	DNA-directed RNA polymerase	GG657469	BDBG_08190	A0A179UYK9	GI:1033932049|GI:261190314|EMBL-CDS:OAT12903.1|REFSEQ:XP_002621567.1	#FF0000	Blastomyces gilchristii (strain SLH14081)	A0A179UYK9	213	A0A179UYK9	Blastomyces gilchristii SLH14081
1	664	DNA-directed RNA polymerase	GG749429	BDDG_04772	F2TF16	GI:327352972|EMBL-CDS:EGE81829.1	#FF0000	Ajellomyces dermatitidis (strain ATCC 18188 / CBS 674.68)	F2TF16	213	F2TF16	Blastomyces dermatitidis ATCC 18188
1	664	Uncharacterized protein	KL584980	M438DRAFT_344891	A0A074XUJ0	GI:662528224|EMBL-CDS:KEQ85602.1	#FF0000	Aureobasidium pullulans EXF-150.	A0A074XUJ0	526	A0A074XUJ0	Aureobasidium pullulans EXF-150
1	664	Uncharacterized protein	AZNF01000004	MAN_03999	A0A0B4FNE7	GI:743635861|EMBL-CDS:KID67241.1	#FF0000	Metarhizium anisopliae ARSEF 549.	A0A0B4FNE7	296	A0A0B4FNE7	Metarhizium anisopliae ARSEF 549
1	664	Spore coat protein SP96	JRVG01000175	LW93_2668	A0A0I9X5U3	GI:829102402|EMBL-CDS:KLO79301.1	#FF0000	Gibberella fujikuroi	A0A0I9X5U3	427	A0A0I9X5U3	Fusarium fujikuroi
1	664	Uncharacterized protein	BCLY01000001	ALT_0386	A0A0S7DH02	EMBL-CDS:GAQ03065.1	#FF0000	Aspergillus lentulus.	A0A0S7DH02	1113	A0A0S7DH02	Aspergillus lentulus
1	664	Uncharacterized protein	CVMT01000010	PISL3812_08634	A0A0U1M7H2	EMBL-CDS:CRG91584.1	#FF0000	Talaromyces islandicus	A0A0U1M7H2	340	A0A0U1M7H2	Talaromyces islandicus
1	664	Extracellular protein	LYCR01000010	ABOM_004080	A0A1F8ABS4	GI:1084343550|EMBL-CDS:OGM49186.1	#FF0000	Aspergillus bombycis.	A0A1F8ABS4	341	A0A1F8ABS4	Aspergillus bombycis
1	664	Uncharacterized protein	KV878346	ASPZODRAFT_660354	A0A1L9SCN1	GI:1111872474|EMBL-CDS:OJJ44975.1	#FF0000	Penicilliopsis zonata CBS 506.65.	A0A1L9SCN1	365	A0A1L9SCN1	Penicilliopsis zonata CBS 506.65
1	664	Lytic polysaccharide monooxygenase	KV878242	ASPFODRAFT_207846	A0A1M3TGY4	GI:1114061022|EMBL-CDS:OJZ86023.1	#FF0000	Aspergillus luchuensis CBS 106.47.	A0A1M3TGY4	373	A0A1M3TGY4	Aspergillus luchuensis CBS 106.47
1	664	Uncharacterized protein	LFMI01000702	A9Z42_0073760	A0A2H3A1K8	GI:1190649803|EMBL-CDS:OTA06615.1	#FF0000	Trichoderma parareesei.	A0A2H3A1K8	420	A0A2H3A1K8	Trichoderma parareesei
1	664	Uncharacterized protein	MSFO01000009	P170DRAFT_459036	A0A2I2FV27	EMBL-CDS:PLB44493.1	#FF0000	Aspergillus steynii IBT 23096.	A0A2I2FV27	301	A0A2I2FV27	Aspergillus steynii IBT 23096
1	664	Uncharacterized protein	MRVG01000007	BM221_007146	A0A2N6NJM2	EMBL-CDS:PMB67478.1	#FF0000	Beauveria bassiana	A0A2N6NJM2	397	A0A2N6NJM2	Beauveria bassiana
1	664	Extracellular protein	JH725163	BBA_05529	J4W5M0	GI:400597936|GI:667654033|EMBL-CDS:EJP65660.1|REFSEQ:XP_008598848.1	#FF0000	Beauveria bassiana (strain ARSEF 2860)	J4W5M0	386	J4W5M0	Beauveria bassiana ARSEF 2860
1	664	Uncharacterized protein	KL584710	M436DRAFT_47498	A0A074WIX4	GI:918811902|GI:662515504|EMBL-CDS:KEQ73070.1|REFSEQ:XP_013427055.1	#FF0000	Aureobasidium namibiae CBS 147.97.	A0A074WIX4	216	A0A074WIX4	Aureobasidium namibiae CBS 147.97
1	664	Uncharacterized protein	KL648636	S7711_05110	A0A084ANW1	GI:666401227|EMBL-CDS:KEY66990.1	#FF0000	Stachybotrys chartarum (strain CBS 109288 / IBT 7711)	A0A084ANW1	396	A0A084ANW1	Stachybotrys chartarum IBT 7711
1	664	Uncharacterized protein	KL660868	S40285_02189	A0A084QB52	GI:667718795|EMBL-CDS:KFA61187.1	#FF0000	Stachybotrys chlorohalonata (strain IBT 40285)	A0A084QB52	396	A0A084QB52	Stachybotrys chlorohalonata IBT 40285
1	664	Uncharacterized protein	KL657833	S40288_03218	A0A084REQ2	GI:667735330|EMBL-CDS:KFA74687.1	#FF0000	Stachybotrys chartarum IBT 40288.	A0A084REQ2	396	A0A084REQ2	Stachybotrys chartarum IBT 40288
1	664	Uncharacterized protein	DS231696	FOXG_00959	A0A0D2XAP3	GI:1070315747|GI:902723781|EMBL-CDS:KNA95351.1|REFSEQ:XP_018233397.1	#FF0000	Fusarium oxysporum f. sp. lycopersici (strain 4287 / CBS 123668 / FGSC9935 / NRRL 34936)	A0A0D2XAP3	427	A0A0D2XAP3	Fusarium oxysporum f. sp. lycopersici 4287
1	664	DNA-directed RNA polymerase	LCZI01000854	EMCG_01543	A0A0G2I186	GI:821507467|EMBL-CDS:KKZ64138.1	#FF0000	Emmonsia crescens UAMH 3008.	A0A0G2I186	287	A0A0G2I186	Emmonsia crescens UAMH 3008
1	664	Uncharacterized protein	BBXM01000127	AUD_7157	A0A0K8LJ35	EMBL-CDS:GAO88197.1	#FF0000	Aspergillus udagawae.	A0A0K8LJ35	632	A0A0K8LJ35	Aspergillus udagawae
1	664	Uncharacterized protein	LKCW01000265	AK830_g11343	A0A0P7B5A2	GI:936406143|EMBL-CDS:KPM35239.1	#FF0000	Neonectria ditissima.	A0A0P7B5A2	434	A0A0P7B5A2	Neonectria ditissima
1	664	Uncharacterized protein	BCMY01000005	ABL_03844	A0A100IGJ6	EMBL-CDS:GAQ40845.1	#FF0000	Aspergillus niger.	A0A100IGJ6	374	A0A100IGJ6	Aspergillus niger
1	664	Uncharacterized protein	LUKN01002185	LLEC1_08062	A0A179I9Y4	GI:1032901634|EMBL-CDS:OAQ99496.1	#FF0000	Cordyceps confragosa	A0A179I9Y4	203	A0A179I9Y4	Cordyceps confragosa
1	664	Related to spore coat protein SP96	FCQH01000001	FMAN_01474	A0A1L7SDJ9	EMBL-CDS:CVK84435.1	#FF0000	Fusarium mangiferae	A0A1L7SDJ9	439	A0A1L7SDJ9	Fusarium mangiferae
1	664	Related to spore coat protein SP96	FJOF01000001	FPRO_01538	A0A1L7V0Q1	EMBL-CDS:CZR33886.1	#FF0000	Fusarium proliferatum (strain ET1)	A0A1L7V0Q1	427	A0A1L7V0Q1	Fusarium proliferatum ET1
1	664	Uncharacterized protein	KV878125	ASPVEDRAFT_146150	A0A1L9P5C1	GI:1111710025|EMBL-CDS:OJI96692.1	#FF0000	Aspergillus versicolor CBS 583.65.	A0A1L9P5C1	342	A0A1L9P5C1	Aspergillus versicolor CBS 583.65
1	664	Uncharacterized protein	KV878728	ASPBRDRAFT_139878	A0A1L9U1H8	GI:1111899276|EMBL-CDS:OJJ65509.1	#FF0000	Aspergillus brasiliensis CBS 101740.	A0A1L9U1H8	347	A0A1L9U1H8	Aspergillus brasiliensis CBS 101740
1	664	Uncharacterized protein	MDDG01000002	PENCOP_c002G07276	A0A1V6V0T3	GI:1168145338|EMBL-CDS:OQE44109.1	#FF0000	Penicillium coprophilum.	A0A1V6V0T3	390	A0A1V6V0T3	Penicillium coprophilum
1	664	Uncharacterized protein	LT853692	ZT3D7_G1266	A0A1X7RFY1	EMBL-CDS:SMQ46121.1	#FF0000	Zymoseptoria tritici ST99CH_3D7.	A0A1X7RFY1	933	A0A1X7RFY1	Zymoseptoria tritici ST99CH_3D7
1	664	Uncharacterized protein	NKHU01000066	CDV56_03506	A0A231MIH5	GI:1226037755|EMBL-CDS:OXS09740.1	#FF0000	Aspergillus thermomutatus.	A0A231MIH5	546	A0A231MIH5	Aspergillus thermomutatus
1	664	Uncharacterized protein	MABQ02000001	AU210_001488	A0A2H3I3X1	EMBL-CDS:PCD46074.1	#FF0000	Fusarium oxysporum f. sp. radicis-cucumerinum.	A0A2H3I3X1	431	A0A2H3I3X1	Fusarium oxysporum f. sp. radicis-cucumerinum
1	664	Related to spore coat protein SP96	FMJU01000001	FFC1_00668	A0A2H3RHW5	GI:829128038|GI:829135926|EMBL-CDS:SCN69779.1	#FF0000	Gibberella fujikuroi	A0A2H3RHW5	427	A0A2H3RHW5	Fusarium fujikuroi
1	664	Related to spore coat protein SP96	FMJY01000002	FRV6_03391	A0A2H3SRT3	EMBL-CDS:SCO79178.1	#FF0000	Fusarium oxysporum	A0A2H3SRT3	433	A0A2H3SRT3	Fusarium oxysporum
1	664	Uncharacterized protein	MSZS01000003	P174DRAFT_129096	A0A2I1CC97	EMBL-CDS:PKX95252.1	#FF0000	Aspergillus novofumigatus IBT 16806.	A0A2I1CC97	1083	A0A2I1CC97	Aspergillus novofumigatus IBT 16806
1	664	RNA polymerase Rpb1 C-terminal repeat domain protein	DS027698	NFIA_056670	A1DNE7	GI:119471779|GI:119406367|EMBL-CDS:EAW16318.1|REFSEQ:XP_001258215.1	#FF0000	Neosartorya fischeri (strain ATCC 1020 / DSM 3700 / CBS 544.65 / FGSCA1164 / JCM 1740 / NRRL 181 / WB 181)	A1DNE7	1010	A1DNE7	Aspergillus fischeri NRRL 181
1	664	Related to spore coat protein SP96	HF679023	FFUJ_00611	S0DKA0	GI:517311454|EMBL-CDS:CCT62801.1	#FF0000	Gibberella fujikuroi (strain CBS 195.34 / IMI 58289 / NRRL A-6831)	S0DKA0	427	S0DKA0	Fusarium fujikuroi IMI 58289
1	664	Genomic scaffold| ProqFM164S02	HG792016	PROQFM164_S02g001569	W6QBA1	GI:584412650|EMBL-CDS:CDM31419.1	#FF0000	Penicillium roqueforti (strain FM164)	W6QBA1	374	W6QBA1	Penicillium roqueforti FM164
1	664	Uncharacterized protein	JH717896	FOZG_01720	W9L4R6	GI:587705152|EMBL-CDS:EWZ51757.1	#FF0000	Fusarium oxysporum Fo47.	W9L4R6	431	W9L4R6	Fusarium oxysporum Fo47
1	664	Uncharacterized protein	JH650968	FOVG_00464	W9Q3E5	GI:587754272|EMBL-CDS:EXA51988.1	#FF0000	Fusarium oxysporum f. sp. pisi HDV247.	W9Q3E5	431	W9Q3E5	Fusarium oxysporum f. sp. pisi HDV247
1	664	Uncharacterized protein	JH659329	FOMG_01731	X0BW26	GI:590047193|EMBL-CDS:EXK49051.1	#FF0000	Fusarium oxysporum f. sp. melonis 26406.	X0BW26	427	X0BW26	Fusarium oxysporum f. sp. melonis 26406
1	664	Uncharacterized protein	JH658365	FOQG_03269	X0CXV1	GI:590068594|EMBL-CDS:EXK96118.1	#FF0000	Fusarium oxysporum f. sp. raphani 54005.	X0CXV1	431	X0CXV1	Fusarium oxysporum f. sp. raphani 54005
1	664	Uncharacterized protein	JH658799	FOPG_00140	X0IKM4	GI:591457244|EMBL-CDS:EXL89443.1	#FF0000	Fusarium oxysporum f. sp. conglutinans race 2 54008.	X0IKM4	431	X0IKM4	Fusarium oxysporum f. sp. conglutinans race 2 5400
1	664	Uncharacterized protein	JH658272	FOIG_01513	X0KEV2	GI:591481064|EMBL-CDS:EXM12124.1	#FF0000	Fusarium oxysporum f. sp. cubense tropical race 4 54006.	X0KEV2	431	X0KEV2	Fusarium oxysporum f. sp. cubense tropical race 4
1	664	Uncharacterized protein	JH657924	FOTG_04347	X0MAG9	GI:591500938|EMBL-CDS:EXM30331.1	#FF0000	Fusarium oxysporum f. sp. vasinfectum 25433.	X0MAG9	431	X0MAG9	Fusarium oxysporum f. sp. vasinfectum 25433
1	664	Uncharacterized protein	ANFO01000569	BBAD15_g6138	A0A0A2W6D6	GI:701774249|EMBL-CDS:KGQ08539.1	#FF0000	Beauveria bassiana D1-5.	A0A0A2W6D6	382	A0A0A2W6D6	Beauveria bassiana D1-5
1	664	Uncharacterized protein	CDPU01000003	BN869_000001887_1	A0A0B7JRF8	EMBL-CDS:CEO45832.1	#FF0000	Bionectria ochroleuca	A0A0B7JRF8	375	A0A0B7JRF8	Clonostachys rosea
1	664	Str. FM013	HG793159	PCAMFM013_S026g000160	A0A0G4PPH4	GI:902268372|EMBL-CDS:CRL28295.1	#FF0000	Penicillium camemberti FM 013.	A0A0G4PPH4	381	A0A0G4PPH4	Penicillium camemberti FM 013
1	664	Uncharacterized protein	AZHA01000001	BBO_00298	A0A167L0L5	GI:1025665009|EMBL-CDS:OAA52457.1	#FF0000	Cordyceps brongniartii RCEF 3172.	A0A167L0L5	387	A0A167L0L5	Cordyceps brongniartii RCEF 3172
1	664	Uncharacterized protein	AZHB01000027	ISF_08160	A0A167MY28	GI:1089743122|GI:1025667504|EMBL-CDS:OAA54889.1|REFSEQ:XP_018701033.1	#FF0000	Cordyceps fumosorosea ARSEF 2679.	A0A167MY28	403	A0A167MY28	Cordyceps fumosorosea ARSEF 2679
1	664	Uncharacterized protein	KV878583	ASPSYDRAFT_55411	A0A1L9TT70	GI:1111894459|EMBL-CDS:OJJ62568.1	#FF0000	Aspergillus sydowii CBS 593.65.	A0A1L9TT70	345	A0A1L9TT70	Aspergillus sydowii CBS 593.65
1	664	Lytic polysaccharide monooxygenase	KV907506	ASPCADRAFT_209896	A0A1R3RDT6	GI:1147627075|EMBL-CDS:OOF92646.1	#FF0000	Aspergillus carbonarius (strain ITEM 5010)	A0A1R3RDT6	347	A0A1R3RDT6	Aspergillus carbonarius ITEM 5010
1	664	Uncharacterized protein	LT854253	ZT1E4_G1244	A0A2H1FMG4	EMBL-CDS:SMR42466.1	#FF0000	Zymoseptoria tritici ST99CH_1E4.	A0A2H1FMG4	930	A0A2H1FMG4	Zymoseptoria tritici ST99CH_1E4
1	664	Uncharacterized protein	LT854273	ZT3D1_G1226	A0A2H1FTN5	EMBL-CDS:SMR44644.1	#FF0000	Zymoseptoria tritici ST99CH_3D1.	A0A2H1FTN5	930	A0A2H1FTN5	Zymoseptoria tritici ST99CH_3D1
1	664	Uncharacterized protein	MTQA01000054	FNYG_03534	A0A2K0WLR0	EMBL-CDS:PNP83212.1	#FF0000	Gibberella nygamai	A0A2K0WLR0	425	A0A2K0WLR0	Fusarium nygamai
1	664	RNA polymerase Rpb1 repeat domain protein	GL698513	MAC_05660	E9E724	GI:322696528|GI:629693417|EMBL-CDS:EFY88319.1|REFSEQ:XP_007812000.1	#FF0000	Metarhizium acridum (strain CQMa 102)	E9E724	306	E9E724	Metarhizium acridum CQMa 102
1	664	Uncharacterized protein	AFQF01001780	FOXB_05611	F9FGT2	GI:342883384|EMBL-CDS:EGU83897.1	#FF0000	Fusarium oxysporum (strain Fo5176)	F9FGT2	449	F9FGT2	Fusarium oxysporum Fo5176
1	664	Uncharacterized protein	KB726996	FOC4_g10014498	N1R8A9	GI:475663644|EMBL-CDS:EMT61439.1	#FF0000	Fusarium oxysporum f. sp. cubense (strain race 4)	N1R8A9	449	N1R8A9	Fusarium oxysporum f. sp. cubense race 4
1	664	Uncharacterized protein	KB731261	FOC1_g10016267	N4TXY3	GI:477508157|EMBL-CDS:ENH61451.1	#FF0000	Fusarium oxysporum f. sp. cubense (strain race 1)	N4TXY3	451	N4TXY3	Fusarium oxysporum f. sp. cubense race 1
1	664	Uncharacterized protein	DS022242	FVEG_00554	W7LME2	GI:1092954461|GI:584127191|EMBL-CDS:EWG36610.1|REFSEQ:XP_018742801.1	#FF0000	Gibberella moniliformis (strain M3125 / FGSC 7600)	W7LME2	414	W7LME2	Fusarium verticillioides 7600
1	664	Uncharacterized protein	JH717842	FOYG_06340	W9IE97	GI:587670601|EMBL-CDS:EWY92942.1	#FF0000	Fusarium oxysporum FOSC 3-a.	W9IE97	433	W9IE97	Fusarium oxysporum FOSC 3-a
1	664	DNA-directed RNA polymerase	LDEV01003637	EMPG_11080	A0A0H1B1Y2	GI:824360831|EMBL-CDS:KLJ05434.1	#FF0000	Emmonsia parva UAMH 139.	A0A0H1B1Y2	213	A0A0H1B1Y2	Emmonsia parva UAMH 139
1	664	Spore coat protein SP96	JRVG01000144	LW93_7003	A0A0I9XDD6	GI:829105122|EMBL-CDS:KLO81846.1	#FF0000	Gibberella fujikuroi	A0A0I9XDD6	356	A0A0I9XDD6	Fusarium fujikuroi
1	664	Extracellular protein	JNOM01000028	ANOM_003210	A0A0L1JCY0	GI:992227512|GI:910298069|EMBL-CDS:KNG89595.1|REFSEQ:XP_015410518.1	#FF0000	Aspergillus nomius NRRL 13137.	A0A0L1JCY0	338	A0A0L1JCY0	Aspergillus nomius NRRL 13137
1	664	Uncharacterized protein	CVMT01000003	PISL3812_04016	A0A0U1LUB3	EMBL-CDS:CRG87003.1	#FF0000	Talaromyces islandicus	A0A0U1LUB3	224	A0A0U1LUB3	Talaromyces islandicus
1	664	Uncharacterized protein	AZHC01000035	NOR_07502	A0A166Y1H4	GI:1025648845|EMBL-CDS:OAA36423.1	#FF0000	Metarhizium rileyi RCEF 4871.	A0A166Y1H4	218	A0A166Y1H4	Metarhizium rileyi RCEF 4871
1	664	Uncharacterized protein	MDYP01000036	PENVUL_c036G02324	A0A1V6RMI9	GI:1168102678|EMBL-CDS:OQE03015.1	#FF0000	Penicillium vulpinum.	A0A1V6RMI9	372	A0A1V6RMI9	Penicillium vulpinum
1	664	Uncharacterized protein	MLQL01000012	PENFLA_c012G09780	A0A1V6T967	GI:1168123271|EMBL-CDS:OQE22666.1	#FF0000	Penicillium flavigenum.	A0A1V6T967	393	A0A1V6T967	Penicillium flavigenum
1	664	Uncharacterized protein	LT882676	ZT1A5_G1242	A0A1Y6L5R3	EMBL-CDS:SMY19807.1	#FF0000	Zymoseptoria tritici ST99CH_1A5.	A0A1Y6L5R3	872	A0A1Y6L5R3	Zymoseptoria tritici ST99CH_1A5
1	664	Extracellular protein	NEXV01000469	AARAC_007407	A0A2G7FT63	EMBL-CDS:PIG83001.1	#FF0000	Aspergillus arachidicola.	A0A2G7FT63	383	A0A2G7FT63	Aspergillus arachidicola
1	664	Related to spore coat protein SP96	FMJU01000010	FFC1_12701	A0A2H3S7R1	GI:829146042|EMBL-CDS:SCO16024.1	#FF0000	Gibberella fujikuroi	A0A2H3S7R1	356	A0A2H3S7R1	Fusarium fujikuroi
1	664	Uncharacterized protein	CH476615	UREG_00166	C4JKV1	GI:237900919|GI:258572943|EMBL-CDS:EEP75320.1|REFSEQ:XP_002540653.1	#FF0000	Uncinocarpus reesii (strain UAMH 1704)	C4JKV1	669	C4JKV1	Uncinocarpus reesii 1704
1	664	Uncharacterized protein	CM001196	MYCGRDRAFT_33493	F9WY72	GI:398409874|GI:339476287|EMBL-CDS:EGP91378.1|REFSEQ:XP_003856402.1	#FF0000	Zymoseptoria tritici (strain CBS 115943 / IPO323)	F9WY72	226	F9WY72	Zymoseptoria tritici IPO323
1	664	Uncharacterized protein	ACJE01000008	ASPNIDRAFT_48700	G3XXV8	GI:350636228|EMBL-CDS:EHA24588.1	#FF0000	Aspergillus niger (strain ATCC 1015 / CBS 113.46 / FGSC A1144 / LSHBAc4 / NCTC 3858a / NRRL 328 / USDA 3528.7)	G3XXV8	328	G3XXV8	Aspergillus niger ATCC 1015
1	664	Related to spore coat protein SP96	HF679033	FFUJ_11473	S0ELF4	GI:517325589|EMBL-CDS:CCT75452.1	#FF0000	Gibberella fujikuroi (strain CBS 195.34 / IMI 58289 / NRRL A-6831)	S0ELF4	356	S0ELF4	Fusarium fujikuroi IMI 58289
1	664	Uncharacterized protein	KE652410	OCS_02460	T5AJ84	GI:531864829|EMBL-CDS:EQL01822.1	#FF0000	Ophiocordyceps sinensis (strain Co18 / CGMCC 3.14243)	T5AJ84	232	T5AJ84	Ophiocordyceps sinensis CO18
1	664	Extracellular protein	JZDT01000121	AFLA70_119g002110	A0A0D9NB55	GI:768709723|EMBL-CDS:KJJ36048.1	#FF0000	Aspergillus flavus (strain ATCC MYA-384 / AF70)	A0A0D9NB55	346	A0A0D9NB55	Aspergillus flavus AF70
1	664	Copper-dependent polysaccharide monooxygenase	LASV01000050	T310_1261	A0A0F4Z2I9	GI:802095124|GI:915169305|EMBL-CDS:KKA24712.1|REFSEQ:XP_013331324.1	#FF0000	Rasamsonia emersonii CBS 393.64.	A0A0F4Z2I9	441	A0A0F4Z2I9	Rasamsonia emersonii CBS 393.64
1	664	Putative RNA polymerase Rpb1 C-terminal repeat domain protein	CDMC01000005	ASPCAL06764	A0A0U5G7U7	EMBL-CDS:CEL05647.1	#FF0000	Aspergillus calidoustus.	A0A0U5G7U7	367	A0A0U5G7U7	Aspergillus calidoustus
1	664	Related to spore coat protein SP96	FCQH01000026	FMAN_14614	A0A1L7UL55	EMBL-CDS:CVL08815.1	#FF0000	Fusarium mangiferae	A0A1L7UL55	355	A0A1L7UL55	Fusarium mangiferae
1	664	Uncharacterized protein	KV878706	ASPBRDRAFT_139337	A0A1L9U2F3	GI:1111899633|EMBL-CDS:OJJ65822.1	#FF0000	Aspergillus brasiliensis CBS 101740.	A0A1L9U2F3	342	A0A1L9U2F3	Aspergillus brasiliensis CBS 101740
1	664	Uncharacterized protein	KV878689	ASPBRDRAFT_132071	A0A1L9UBL2	GI:1111903029|EMBL-CDS:OJJ69038.1	#FF0000	Aspergillus brasiliensis CBS 101740.	A0A1L9UBL2	356	A0A1L9UBL2	Aspergillus brasiliensis CBS 101740
1	664	Uncharacterized protein	MKZY01000001	OAory_01027020	A0A1S9DYI1	GI:1150479345|EMBL-CDS:OOO14107.1	#FF0000	Aspergillus oryzae	A0A1S9DYI1	346	A0A1S9DYI1	Aspergillus oryzae
1	664	Uncharacterized protein	MTQA01000463	FNYG_15073	A0A2K0UKW4	EMBL-CDS:PNP58410.1	#FF0000	Gibberella nygamai	A0A2K0UKW4	358	A0A2K0UKW4	Fusarium nygamai
1	664	Extracellular protein| putative	EQ963475	AFLA_109400	B8N8Z4	GI:220697222|GI:238491144|EMBL-CDS:EED53563.1|REFSEQ:XP_002376809.1	#FF0000	Aspergillus flavus (strain ATCC 200026 / FGSC A1120 / NRRL 3357 / JCM12722 / SRRC 167)	B8N8Z4	346	B8N8Z4	Aspergillus flavus NRRL3357
1	664	Extracellular protein	AKHY01000182	Ao3042_09071	I8IBG0	GI:391865617|EMBL-CDS:EIT74896.1	#FF0000	Aspergillus oryzae (strain 3.042)	I8IBG0	346	I8IBG0	Aspergillus oryzae 3.042
1	664	Uncharacterized protein	AP007157	AO090023000525	Q2UHA2	GI:83768926|GI:169773193|EMBL-CDS:BAE59063.1|REFSEQ:XP_001821065.1	#FF0000	Aspergillus oryzae (strain ATCC 42149 / RIB 40)	Q2UHA2	346	Q2UHA2	Aspergillus oryzae RIB40
1	664	Uncharacterized protein	DS022262	FVEG_12856	W7NEI6	GI:1092993189|GI:584145455|EMBL-CDS:EWG54722.1|REFSEQ:XP_018760913.1	#FF0000	Gibberella moniliformis (strain M3125 / FGSC 7600)	W7NEI6	357	W7NEI6	Fusarium verticillioides 7600
1	664	Uncharacterized protein	KL584829	M437DRAFT_45242	A0A074VUI4	GI:662506483|EMBL-CDS:KEQ64093.1	#FF0000	Aureobasidium melanogenum CBS 110374.	A0A074VUI4	223	A0A074VUI4	Aureobasidium melanogenum CBS 110374
1	664	Uncharacterized protein	JOMC01000105	HK57_00702	A0A0C1E5V1	GI:742075545|EMBL-CDS:KIA75533.1	#FF0000	Aspergillus ustus.	A0A0C1E5V1	376	A0A0C1E5V1	Aspergillus ustus
1	664	Uncharacterized protein	JYKN01001538	AOCH_005855	A0A0F8UKP0	GI:816342594|EMBL-CDS:KKK20118.1	#FF0000	Aspergillus ochraceoroseus.	A0A0F8UKP0	365	A0A0F8UKP0	Aspergillus ochraceoroseus
1	664	Uncharacterized protein	JZBS01000809	ARAM_001032	A0A0F8VPT1	GI:816350284|EMBL-CDS:KKK25191.1	#FF0000	Aspergillus rambellii.	A0A0F8VPT1	364	A0A0F8VPT1	Aspergillus rambellii
1	664	Extracellular protein	KQ087358	Y699_04232	A0A0J5T021	GI:846917655|EMBL-CDS:KMK63402.1	#FF0000	Aspergillus fumigatus Z5.	A0A0J5T021	704	A0A0J5T021	Aspergillus fumigatus Z5
1	664	Uncharacterized protein	KV459378	VE02_01932	A0A1B8FZ81	GI:1040553283|EMBL-CDS:OBT88901.1	#FF0000	Pseudogymnoascus sp. 03VT05.	A0A1B8FZ81	489	A0A1B8FZ81	Pseudogymnoascus sp. 03VT05
1	664	Related to spore coat protein SP96	FJOF01000009	FPRO_15176	A0A1L7VZ02	EMBL-CDS:CZR45648.1	#FF0000	Fusarium proliferatum (strain ET1)	A0A1L7VZ02	356	A0A1L7VZ02	Fusarium proliferatum ET1
1	664	Uncharacterized protein	KV878970	ASPACDRAFT_1884841	A0A1L9XA03	GI:1147184205|GI:1111949379|EMBL-CDS:OJK05277.1|REFSEQ:XP_020061616.1	#FF0000	Aspergillus aculeatus ATCC 16872.	A0A1L9XA03	387	A0A1L9XA03	Aspergillus aculeatus ATCC 16872
1	664	Uncharacterized protein	MDYO01000010	PENSOL_c010G03767	A0A1V6RA81	GI:1168097800|EMBL-CDS:OQD98102.1	#FF0000	Penicillium solitum.	A0A1V6RA81	381	A0A1V6RA81	Penicillium solitum
1	664	Uncharacterized protein	MOOB01000022	PENNAL_c0022G10136	A0A1V6YEW6	GI:1168188658|EMBL-CDS:OQE86080.1	#FF0000	Penicillium nalgiovense.	A0A1V6YEW6	400	A0A1V6YEW6	Penicillium nalgiovense
1	664	Uncharacterized protein	NKHT01000197	CDV57_06295	A0A229XTT8	GI:1220566650|EMBL-CDS:OXN23500.1	#FF0000	Neosartorya fumigata	A0A229XTT8	704	A0A229XTT8	Aspergillus fumigatus
1	664	DNA-directed RNA polymerase	PDNC01000143	GX51_07317	A0A2B7WLC9	EMBL-CDS:PGG97454.1	#FF0000	Emmonsia parva.	A0A2B7WLC9	213	A0A2B7WLC9	Emmonsia parva
1	664	Uncharacterized protein	PDND01000155	GX50_06437	A0A2B7ZC75	EMBL-CDS:PGH30809.1	#FF0000	Emmonsia crescens.	A0A2B7ZC75	283	A0A2B7ZC75	Emmonsia crescens
1	664	Aspergillus niger contig An08c0290| genomic contig	AM270184	An08g11590	A2QSQ7	GI:134077789|EMBL-CDS:CAK45829.1	#FF0000	Aspergillus niger (strain CBS 513.88 / FGSC A1513)	A2QSQ7	537	A2QSQ7	Aspergillus niger CBS 513.88
1	664	Extracellular protein| putative	DS499599	AFUB_076950	B0Y8D4	GI:159124547|EMBL-CDS:EDP49665.1	#FF0000	Neosartorya fumigata (strain CEA10 / CBS 144.89 / FGSC A1163)	B0Y8D4	374	B0Y8D4	Aspergillus fumigatus A1163
1	664	Extracellular protein| putative	EQ962659	TSTA_059420	B8MQN3	GI:242820740|GI:218714032|EMBL-CDS:EED13456.1|REFSEQ:XP_002487567.1	#FF0000	Talaromyces stipitatus (strain ATCC 10500 / CBS 375.48 / QM 6759 /NRRL 1006)	B8MQN3	347	B8MQN3	Talaromyces stipitatus ATCC 10500
1	664	Uncharacterized protein	GG698896	NECHADRAFT_103191	C7YHZ7	GI:302923623|GI:256734656|EMBL-CDS:EEU48002.1|REFSEQ:XP_003053715.1	#FF0000	Nectria haematococca (strain 77-13-4 / ATCC MYA-4622 / FGSC 9596 /MPVI)	C7YHZ7	465	C7YHZ7	[Nectria] haematococca mpVI 77-13-4
1	664	Uncharacterized protein	ABSU01000011	ARB_07879	D4AUG2	GI:302503615|GI:291177333|EMBL-CDS:EFE33127.1|REFSEQ:XP_003013767.1	#FF0000	Arthroderma benhamiae (strain ATCC MYA-4681 / CBS 112371)	D4AUG2	285	D4AUG2	Trichophyton benhamiae CBS 112371
1	664	Uncharacterized protein	DS989831	MGYG_08815	E4V726	GI:315039783|GI:311337690|EMBL-CDS:EFQ96892.1|REFSEQ:XP_003169269.1	#FF0000	Arthroderma gypseum (strain ATCC MYA-4604 / CBS 118893)	E4V726	375	E4V726	Nannizzia gypsea CBS 118893
1	664	Extracellular protein| putative	AAHF01000006	AFUA_6G10930	Q4WM72	GI:66848613|GI:70992263|EMBL-CDS:EAL88942.1|REFSEQ:XP_750980.1	#FF0000	Neosartorya fumigata (strain ATCC MYA-4609 / Af293 / CBS 101355 / FGSCA1100)	Q4WM72	704	Q4WM72	Aspergillus fumigatus Af293
1	664	Uncharacterized protein	AOKY01000253	H109_03547	A0A059JA62	GI:633048201|EMBL-CDS:KDB24578.1	#FF0000	Trichophyton interdigitale MR816.	A0A059JA62	387	A0A059JA62	Trichophyton interdigitale MR816
1	664	Uncharacterized protein	DF933846	TCE0_050f18241	A0A0B8N5K7	GI:748550757|EMBL-CDS:GAM43432.1	#FF0000	Talaromyces cellulolyticus.	A0A0B8N5K7	365	A0A0B8N5K7	Talaromyces cellulolyticus
1	664	Pdp3-interacting factor 1	BCLY01000004	ALT_2242	A0A0S7DLV5	EMBL-CDS:GAQ04921.1	#FF0000	Aspergillus lentulus.	A0A0S7DLV5	493	A0A0S7DLV5	Aspergillus lentulus
1	664	Extracellular protein	LHPM01000019	A7C99_6222	A0A178EPP1	GI:1029996735|EMBL-CDS:OAL61655.1	#FF0000	Trichophyton rubrum	A0A178EPP1	701	A0A178EPP1	Trichophyton rubrum
1	664	Uncharacterized protein	LHPN01000002	A7D00_1345	A0A178FLC9	GI:1030008664|EMBL-CDS:OAL73320.1	#FF0000	Trichophyton violaceum.	A0A178FLC9	388	A0A178FLC9	Trichophyton violaceum
1	664	Uncharacterized protein	PDNB01000004	AJ79_00472	A0A2B7YBJ8	EMBL-CDS:PGH18403.1	#FF0000	Helicocarpus griseus UAMH5409.	A0A2B7YBJ8	411	A0A2B7YBJ8	Helicocarpus griseus UAMH5409
1	664	Uncharacterized protein	NPFK01000366	PENO1_089010	A0A2H3I2L1	EMBL-CDS:PCG92372.1	#FF0000	Penicillium occitanis.	A0A2H3I2L1	365	A0A2H3I2L1	Penicillium occitanis
1	664	Uncharacterized protein	MAVT02001154	DHEL01_v209762	A0A2P5HNL3	EMBL-CDS:POS71846.1	#FF0000	Diaporthe helianthi.	A0A2P5HNL3	403	A0A2P5HNL3	Diaporthe helianthi
1	664	Uncharacterized protein	ACYE01000054	TRV_00940	D4D1I9	GI:302666535|GI:291188941|EMBL-CDS:EFE44254.1|REFSEQ:XP_003024865.1	#FF0000	Trichophyton verrucosum (strain HKI 0517)	D4D1I9	317	D4D1I9	Trichophyton verrucosum HKI 0517
1	664	Extracellular protein	DS995740	TEQG_04573	F2PUJ6	GI:326481554|EMBL-CDS:EGE05564.1	#FF0000	Trichophyton equinum (strain ATCC MYA-4606 / CBS 127.97)	F2PUJ6	389	F2PUJ6	Trichophyton equinum CBS 127.97
1	664	Endoglucanase	GG698511	TESG_05870	F2S4J9	GI:326474489|EMBL-CDS:EGD98498.1	#FF0000	Trichophyton tonsurans (strain CBS 112818)	F2S4J9	306	F2S4J9	Trichophyton tonsurans CBS 112818
1	664	Uncharacterized protein	ABDF02000090	TRIVIDRAFT_135791	G9NA02	GI:927410244|GI:358379089|EMBL-CDS:EHK16770.1|REFSEQ:XP_013950966.1	#FF0000	Hypocrea virens (strain Gv29-8 / FGSC 10586)	G9NA02	376	G9NA02	Trichoderma virens Gv29-8
1	664	Uncharacterized protein	KK207862	H103_04971	A0A022W0C2	GI:607915800|EMBL-CDS:EZF51816.1	#FF0000	Trichophyton rubrum CBS 288.86.	A0A022W0C2	388	A0A022W0C2	Trichophyton rubrum CBS 288.86
1	664	Uncharacterized protein	KK208868	H105_04989	A0A022XR89	GI:607939761|EMBL-CDS:EZF73034.1	#FF0000	Trichophyton soudanense CBS 452.61.	A0A022XR89	388	A0A022XR89	Trichophyton soudanense CBS 452.61
1	664	RNA polymerase Rpb1 repeat domain protein	AZHE01000019	MAM_06215	A0A0B2WPB4	GI:734658790|EMBL-CDS:KHN95853.1	#FF0000	Metarhizium album ARSEF 1941.	A0A0B2WPB4	300	A0A0B2WPB4	Metarhizium album ARSEF 1941
1	664	Uncharacterized protein	KV878709	ASPBRDRAFT_139491	A0A1L9U232	GI:1111899539|EMBL-CDS:OJJ65731.1	#FF0000	Aspergillus brasiliensis CBS 101740.	A0A1L9U232	510	A0A1L9U232	Aspergillus brasiliensis CBS 101740
1	664	Uncharacterized protein	BFBS01016459	TMEN_7840	A0A2P2EVN5	EMBL-CDS:GBF65123.1	#FF0000	Trichophyton mentagrophytes.	A0A2P2EVN5	387	A0A2P2EVN5	Trichophyton mentagrophytes
1	664	Uncharacterized protein	GG700650	TERG_02733	F2SKG2	GI:674806275|EMBL-CDS:EGD86472.2	#FF0000	Trichophyton rubrum (strain ATCC MYA-4607 / CBS 118892)	F2SKG2	341	F2SKG2	Trichophyton rubrum CBS 118892
1	664	Uncharacterized protein	KQ030587	HIM_09486	A0A0F7ZXQ5	GI:799241998|EMBL-CDS:KJZ71132.1	#FF0000	Hirsutella minnesotensis 3608.	A0A0F7ZXQ5	230	A0A0F7ZXQ5	Hirsutella minnesotensis 3608
1	664	Uncharacterized protein	LHQQ01000104	ACN38_g6604	A0A0M8P310	GI:924886433|EMBL-CDS:KOS42497.1	#FF0000	Penicillium nordicum.	A0A0M8P310	372	A0A0M8P310	Penicillium nordicum
1	664	Uncharacterized protein	LKCW01000163	AK830_g9038	A0A0P7B6H0	GI:936408703|EMBL-CDS:KPM37512.1	#FF0000	Neonectria ditissima.	A0A0P7B6H0	384	A0A0P7B6H0	Neonectria ditissima
1	664	Uncharacterized protein	CDMC01000036	ASPCAL15025	A0A0U5GIL8	EMBL-CDS:CEL11931.1	#FF0000	Aspergillus calidoustus.	A0A0U5GIL8	427	A0A0U5GIL8	Aspergillus calidoustus
1	664	Uncharacterized protein	LFZN01000025	AC578_9244	A0A139HNA6	GI:1002208496|EMBL-CDS:KXT03965.1	#FF0000	Mycosphaerella eumusae.	A0A139HNA6	552	A0A139HNA6	Mycosphaerella eumusae
1	664	Uncharacterized protein	CM002799	EN45_082240	A0A167UT25	GI:1021542307|EMBL-CDS:KZN89611.1	#FF0000	Penicillium chrysogenum	A0A167UT25	406	A0A167UT25	Penicillium chrysogenum
1	664	Carbohydrate-binding module family 18 protein	KZ613492	NA56DRAFT_222026	A0A2J6PXS8	EMBL-CDS:PMD18838.1	#FF0000	Pezoloma ericae.	A0A2J6PXS8	420	A0A2J6PXS8	Pezoloma ericae
1	664	Pc21g20790 protein	AM920436	Pc21g20790	B6HL28	GI:255956625|GI:211590776|EMBL-CDS:CAP96976.1|REFSEQ:XP_002569065.1	#FF0000	Penicillium rubens (strain ATCC 28089 / DSM 1075 / NRRL 1951 /Wisconsin 54-1255)	B6HL28	415	B6HL28	Penicillium rubens Wisconsin 54-1255
1	664	Extracellular protein| putative	DS995906	PMAA_010010	B6QUP4	GI:210064623|GI:212545899|EMBL-CDS:EEA18718.1|REFSEQ:XP_002153103.1	#FF0000	Talaromyces marneffei (strain ATCC 18224 / CBS 334.59 / QM 7333)	B6QUP4	366	B6QUP4	Talaromyces marneffei ATCC 18224
1	664	Endoglucanase| putative	EQ962655	TSTA_126200	B8MBC2	GI:218719491|GI:242796915|EMBL-CDS:EED18911.1|REFSEQ:XP_002482903.1	#FF0000	Talaromyces stipitatus (strain ATCC 10500 / CBS 375.48 / QM 6759 /NRRL 1006)	B8MBC2	216	B8MBC2	Talaromyces stipitatus ATCC 10500
1	664	Uncharacterized protein	JPOX01000002	GQ26_0022020	A0A093VS10	GI:680000696|GI:680000697|EMBL-CDS:KFX52798.1|EMBL-CDS:KFX52799.1	#FF0000	Talaromyces marneffei PM1.	A0A093VS10	366	A0A093VS10	Talaromyces marneffei PM1
1	664	Uncharacterized protein	KV878208	ASPTUDRAFT_48521	A0A1L9MSH0	GI:1111692855|EMBL-CDS:OJI79812.1	#FF0000	Aspergillus tubingensis CBS 134.48.	A0A1L9MSH0	354	A0A1L9MSH0	Aspergillus tubingensis CBS 134.48
1	664	Uncharacterized protein	MDYM01000023	PENPOL_c023G02347	A0A1V6N7K3	GI:1168057724|EMBL-CDS:OQD60436.1	#FF0000	Penicillium polonicum.	A0A1V6N7K3	385	A0A1V6N7K3	Penicillium polonicum
1	664	Uncharacterized protein	NKHV01000067	CDV55_04030	A0A229YWI2	GI:1220583330|EMBL-CDS:OXN36726.1	#FF0000	Aspergillus turcosus.	A0A229YWI2	490	A0A229YWI2	Aspergillus turcosus
1	664	Uncharacterized protein	MABQ02000011	AU210_015304	A0A2H3G7J0	EMBL-CDS:PCD23788.1	#FF0000	Fusarium oxysporum f. sp. radicis-cucumerinum.	A0A2H3G7J0	353	A0A2H3G7J0	Fusarium oxysporum f. sp. radicis-cucumerinum
1	664	Uncharacterized protein	KZ559497	BDW42DRAFT_56201	A0A2J5I9J1	EMBL-CDS:PLN86708.1	#FF0000	Aspergillus taichungensis.	A0A2J5I9J1	359	A0A2J5I9J1	Aspergillus taichungensis
1	664	Uncharacterized protein	DS027060	ACLA_084630	A1CTY1	GI:121699858|GI:119396336|EMBL-CDS:EAW06768.1|REFSEQ:XP_001268194.1	#FF0000	Aspergillus clavatus (strain ATCC 1007 / CBS 513.65 / DSM 816 /NCTC 3887 / NRRL 1)	A1CTY1	467	A1CTY1	Aspergillus clavatus NRRL 1
1	664	Uncharacterized protein	CP003014	THITE_2124610	G2RG22	GI:367055468|GI:347005378|EMBL-CDS:AEO71776.1|REFSEQ:XP_003658112.1	#FF0000	Thielavia terrestris (strain ATCC 38088 / NRRL 8126)	G2RG22	415	G2RG22	Thielavia terrestris NRRL 8126
1	664	Uncharacterized protein	KK207875	H103_05635	A0A022VY95	GI:607914984|EMBL-CDS:EZF51050.1	#FF0000	Trichophyton rubrum CBS 288.86.	A0A022VY95	236	A0A022VY95	Trichophyton rubrum CBS 288.86
1	664	Uncharacterized protein	KK208880	H105_05653	A0A022XNN8	GI:607938974|EMBL-CDS:EZF72292.1	#FF0000	Trichophyton soudanense CBS 452.61.	A0A022XNN8	236	A0A022XNN8	Trichophyton soudanense CBS 452.61
1	664	Uncharacterized protein	KL657302	S40288_10340	A0A084RV58	GI:667741267|EMBL-CDS:KFA80093.1	#FF0000	Stachybotrys chartarum IBT 40288.	A0A084RV58	250	A0A084RV58	Stachybotrys chartarum IBT 40288
1	664	Uncharacterized protein	JPKE01002867	V502_08208	A0A094HAD4	GI:682450752|EMBL-CDS:KFZ10309.1	#FF0000	Pseudogymnoascus sp. VKM F-4520	A0A094HAD4	431	A0A094HAD4	Pseudogymnoascus sp. VKM F-4520 (FW-2644)
1	664	Uncharacterized protein	JPKC01003557	V500_10698	A0A094HD78	GI:682407273|EMBL-CDS:KFY82242.1	#FF0000	Pseudogymnoascus sp. VKM F-4518	A0A094HD78	431	A0A094HD78	Pseudogymnoascus sp. VKM F-4518 (FW-2643)
1	664	Uncharacterized protein	AZHE01000014	MAM_05554	A0A0B2WKM5	GI:734659553|EMBL-CDS:KHN96611.1	#FF0000	Metarhizium album ARSEF 1941.	A0A0B2WKM5	387	A0A0B2WKM5	Metarhizium album ARSEF 1941
1	664	Uncharacterized protein	DS231734	FOXG_16838	A0A0D2YJX2	GI:1070360657|GI:902748023|EMBL-CDS:KNB19590.1|REFSEQ:XP_018257635.1	#FF0000	Fusarium oxysporum f. sp. lycopersici (strain 4287 / CBS 123668 / FGSC9935 / NRRL 34936)	A0A0D2YJX2	353	A0A0D2YJX2	Fusarium oxysporum f. sp. lycopersici 4287
1	664	Cellulose-binding domain protein	AZHC01000045	NOR_08143	A0A166WSP7	GI:1025647435|EMBL-CDS:OAA35051.1	#FF0000	Metarhizium rileyi RCEF 4871.	A0A166WSP7	506	A0A166WSP7	Metarhizium rileyi RCEF 4871
1	664	Endoglucanase	LHPM01000019	A7C99_6759	A0A178EQ65	GI:861304982|GI:1029997262|EMBL-CDS:OAL62182.1	#FF0000	Trichophyton rubrum	A0A178EQ65	236	A0A178EQ65	Trichophyton rubrum
1	664	Endoglucanase	LHPN01000004	A7D00_3245	A0A178FL93	GI:1030007589|EMBL-CDS:OAL72247.1	#FF0000	Trichophyton violaceum.	A0A178FL93	236	A0A178FL93	Trichophyton violaceum
1	664	DNA-directed RNA polymerase	GG657461	BDBG_06549	A0A179URL5	GI:1033929891|EMBL-CDS:OAT10745.1	#FF0000	Blastomyces gilchristii (strain SLH14081)	A0A179URL5	338	A0A179URL5	Blastomyces gilchristii SLH14081
1	664	Uncharacterized protein	KV454614	VE00_05342	A0A1B8CAM1	GI:1040502076|EMBL-CDS:OBT43886.1	#FF0000	Pseudogymnoascus sp. WSF 3629.	A0A1B8CAM1	513	A0A1B8CAM1	Pseudogymnoascus sp. WSF 3629
1	664	Related to spore coat protein SP96	FMJY01000001	FRV6_00295	A0A2H3T2U0	EMBL-CDS:SCO76083.1	#FF0000	Fusarium oxysporum	A0A2H3T2U0	353	A0A2H3T2U0	Fusarium oxysporum
1	664	Putative endoglucanase	MSZS01000006	P174DRAFT_513979	A0A2I1C1R9	EMBL-CDS:PKX91521.1	#FF0000	Aspergillus novofumigatus IBT 16806.	A0A2I1C1R9	219	A0A2I1C1R9	Aspergillus novofumigatus IBT 16806
1	664	Endoglucanase| putative	DS027697	NFIA_006240	A1DKM1	GI:119407310|GI:119474563|EMBL-CDS:EAW17260.1|REFSEQ:XP_001259157.1	#FF0000	Neosartorya fischeri (strain ATCC 1020 / DSM 3700 / CBS 544.65 / FGSCA1164 / JCM 1740 / NRRL 181 / WB 181)	A1DKM1	242	A1DKM1	Aspergillus fischeri NRRL 181
1	664	Endoglucanase| putative	DS499596	AFUB_044010	B0XZD3	GI:159128114|EMBL-CDS:EDP53229.1	#FF0000	Neosartorya fumigata (strain CEA10 / CBS 144.89 / FGSC A1163)	B0XZD3	219	B0XZD3	Aspergillus fumigatus A1163
1	664	DNA-directed RNA polymerase	EQ999978	BDCG_06070	C5GMQ2	GI:1033919961|EMBL-CDS:EEQ90950.2	#FF0000	Ajellomyces dermatitidis (strain ER-3 / ATCC MYA-2586)	C5GMQ2	295	C5GMQ2	Blastomyces dermatitidis ER-3
1	664	Uncharacterized protein	ABSU01000002	ARB_04988	D4AKZ2	GI:302509472|GI:291180266|EMBL-CDS:EFE36051.1|REFSEQ:XP_003016696.1	#FF0000	Arthroderma benhamiae (strain ATCC MYA-4681 / CBS 112371)	D4AKZ2	257	D4AKZ2	Trichophyton benhamiae CBS 112371
1	664	Uncharacterized protein	DS989823	MGYG_02092	E4UPP1	GI:315050374|GI:311339876|EMBL-CDS:EFQ99078.1|REFSEQ:XP_003174561.1	#FF0000	Arthroderma gypseum (strain ATCC MYA-4604 / CBS 118893)	E4UPP1	236	E4UPP1	Nannizzia gypsea CBS 118893
1	664	Uncharacterized protein	GG700650	TERG_03353	F2SK00	GI:326461650|GI:327303232|EMBL-CDS:EGD87103.1|REFSEQ:XP_003236308.1	#FF0000	Trichophyton rubrum (strain ATCC MYA-4607 / CBS 118892)	F2SK00	236	F2SK00	Trichophyton rubrum CBS 118892
1	664	DNA-directed RNA polymerase	GG749431	BDDG_05110	F2TG04	GI:893696950|EMBL-CDS:EGE82167.2	#FF0000	Ajellomyces dermatitidis (strain ATCC 18188 / CBS 674.68)	F2TG04	338	F2TG04	Blastomyces dermatitidis ATCC 18188
1	664	Uncharacterized protein	AFQF01000504	FOXB_01587	F9F5B2	GI:342888664|EMBL-CDS:EGU87901.1	#FF0000	Fusarium oxysporum (strain Fo5176)	F9F5B2	636	F9F5B2	Fusarium oxysporum Fo5176
1	664	Uncharacterized protein	KB726365	FOC4_g10003203	N1RS48	GI:475672314|EMBL-CDS:EMT69478.1	#FF0000	Fusarium oxysporum f. sp. cubense (strain race 4)	N1RS48	350	N1RS48	Fusarium oxysporum f. sp. cubense race 4
1	664	Uncharacterized protein	KB730133	FOC1_g10002138	N4UPA3	GI:477519779|EMBL-CDS:ENH71945.1	#FF0000	Fusarium oxysporum f. sp. cubense (strain race 1)	N4UPA3	364	N4UPA3	Fusarium oxysporum f. sp. cubense race 1
1	664	Endoglucanase| putative	AAHF01000010	AFUA_3G03950	Q4WF00	GI:70986442|GI:66846344|EMBL-CDS:EAL86677.1|REFSEQ:XP_748715.1	#FF0000	Neosartorya fumigata (strain ATCC MYA-4609 / Af293 / CBS 101355 / FGSCA1100)	Q4WF00	219	Q4WF00	Aspergillus fumigatus Af293
1	664	DNA-directed RNA polymerase	GL538372	BDFG_02294	T5BS13	GI:531985435|EMBL-CDS:EQL36022.1	#FF0000	Blastomyces dermatitidis ATCC 26199.	T5BS13	338	T5BS13	Blastomyces dermatitidis ATCC 26199
1	664	Uncharacterized protein	JH717849	FOYG_15429	W9HFW9	GI:587658775|EMBL-CDS:EWY81152.1	#FF0000	Fusarium oxysporum FOSC 3-a.	W9HFW9	353	W9HFW9	Fusarium oxysporum FOSC 3-a
1	664	Uncharacterized protein	JH717905	FOZG_12967	W9JMJ5	GI:587686601|EMBL-CDS:EWZ33206.1	#FF0000	Fusarium oxysporum Fo47.	W9JMJ5	353	W9JMJ5	Fusarium oxysporum Fo47
1	664	Uncharacterized protein	JH650980	FOVG_14316	W9NQ23	GI:587737198|EMBL-CDS:EXA34914.1	#FF0000	Fusarium oxysporum f. sp. pisi HDV247.	W9NQ23	353	W9NQ23	Fusarium oxysporum f. sp. pisi HDV247
1	664	Uncharacterized protein	KI980353	FOMG_16642	W9ZEW8	GI:590024975|EMBL-CDS:EXK26833.1	#FF0000	Fusarium oxysporum f. sp. melonis 26406.	W9ZEW8	353	W9ZEW8	Fusarium oxysporum f. sp. melonis 26406
1	664	Uncharacterized protein	JH658414	FOQG_13299	X0BKQ0	GI:590054907|EMBL-CDS:EXK82431.1	#FF0000	Fusarium oxysporum f. sp. raphani 54005.	X0BKQ0	353	X0BKQ0	Fusarium oxysporum f. sp. raphani 54005
1	664	Uncharacterized protein	JH658859	FOPG_09438	X0HUM6	GI:591443013|EMBL-CDS:EXL75591.1	#FF0000	Fusarium oxysporum f. sp. conglutinans race 2 54008.	X0HUM6	353	X0HUM6	Fusarium oxysporum f. sp. conglutinans race 2 5400
1	664	Uncharacterized protein	KK036134	FOIG_15774	X0IQG9	GI:591459452|EMBL-CDS:EXL91092.1	#FF0000	Fusarium oxysporum f. sp. cubense tropical race 4 54006.	X0IQG9	353	X0IQG9	Fusarium oxysporum f. sp. cubense tropical race 4
1	664	Uncharacterized protein	JH657945	FOTG_10483	X0LKK4	GI:591491935|EMBL-CDS:EXM21546.1	#FF0000	Fusarium oxysporum f. sp. vasinfectum 25433.	X0LKK4	353	X0LKK4	Fusarium oxysporum f. sp. vasinfectum 25433
1	664	Uncharacterized protein	AOKY01000279	H109_04033	A0A059J8R7	GI:633047614|EMBL-CDS:KDB24088.1	#FF0000	Trichophyton interdigitale MR816.	A0A059J8R7	236	A0A059J8R7	Trichophyton interdigitale MR816
1	664	RNA polymerase Rpb1 repeat domain protein	JHTR01000005	UV8b_1464	A0A063C3H0	GI:632918141|EMBL-CDS:KDB17580.1	#FF0000	Ustilaginoidea virens.	A0A063C3H0	299	A0A063C3H0	Ustilaginoidea virens
1	664	Uncharacterized protein	KL649631	S7711_10209	A0A084AF24	GI:666397145|EMBL-CDS:KEY63903.1	#FF0000	Stachybotrys chartarum (strain CBS 109288 / IBT 7711)	A0A084AF24	250	A0A084AF24	Stachybotrys chartarum IBT 7711
1	664	Uncharacterized protein	JPJS01000410	V490_01458	A0A093YMJ4	GI:682278287|EMBL-CDS:KFY00140.1	#FF0000	Pseudogymnoascus sp. VKM F-3557.	A0A093YMJ4	433	A0A093YMJ4	Pseudogymnoascus sp. VKM F-3557
1	664	Uncharacterized protein	JPJZ01000072	V497_00600	A0A094E5L7	GI:682384856|EMBL-CDS:KFY67000.1	#FF0000	Pseudogymnoascus sp. VKM F-4516	A0A094E5L7	432	A0A094E5L7	Pseudogymnoascus sp. VKM F-4516 (FW-969)
1	664	Uncharacterized protein	JQFX01000563	PEX2_029240	A0A0A2IGH6	GI:700466416|GI:700479752|GI:1027014434|GI:700449189|EMBL-CDS:KGO55106.1|REFSEQ:XP_016597321.1	#FF0000	Penicillium expansum	A0A0A2IGH6	385	A0A0A2IGH6	Penicillium expansum
1	664	Uncharacterized protein	LAFY01000473	TI39_contig481g00037	A0A0F4GJY4	GI:796706069|EMBL-CDS:KJX97568.1	#FF0000	Zymoseptoria brevis.	A0A0F4GJY4	979	A0A0F4GJY4	Zymoseptoria brevis
1	664	RNA polymerase Rpb1 repeat domain protein	LAYC01000001	DCS_02397	A0A151GVW5	GI:1057463350|GI:1008938271|EMBL-CDS:KYK61255.1	#FF0000	Drechmeria coniospora.	A0A151GVW5	293	A0A151GVW5	Drechmeria coniospora
1	664	Uncharacterized protein	AZHC01000014	NOR_05104	A0A162HRP9	GI:1025654758|EMBL-CDS:OAA42255.1	#FF0000	Metarhizium rileyi RCEF 4871.	A0A162HRP9	437	A0A162HRP9	Metarhizium rileyi RCEF 4871
1	664	Uncharacterized protein	AZHF01000003	LEL_05396	A0A162K8R0	GI:1025691290|EMBL-CDS:OAA78573.1	#FF0000	Cordyceps confragosa RCEF 1005.	A0A162K8R0	230	A0A162K8R0	Cordyceps confragosa RCEF 1005
1	664	Extracellular protein	AZHA01000002	BBO_00989	A0A167K071	GI:1025663591|EMBL-CDS:OAA51042.1	#FF0000	Cordyceps brongniartii RCEF 3172.	A0A167K071	231	A0A167K071	Cordyceps brongniartii RCEF 3172
1	664	Uncharacterized protein	LGUA01000667	ACJ72_05083	A0A1B7NV02	GI:1035638393|EMBL-CDS:OAX80583.1	#FF0000	Emmonsia sp. CAC-2015a.	A0A1B7NV02	294	A0A1B7NV02	Emmonsia sp. CAC-2015a
1	664	Uncharacterized protein	NAJO01000004	B0A48_02514	A0A1V8TNV1	GI:1172598148|EMBL-CDS:OQO13050.1	#FF0000	Rachicladosporium antarcticum.	A0A1V8TNV1	419	A0A1V8TNV1	Rachicladosporium antarcticum
1	664	Uncharacterized protein	NKHT01000093	CDV57_05033	A0A229Y0B6	GI:1220569480|EMBL-CDS:OXN25898.1	#FF0000	Neosartorya fumigata	A0A229Y0B6	485	A0A229Y0B6	Aspergillus fumigatus
1	664	Uncharacterized protein	BFBS01016003	TMEN_4096	A0A2P2EKK9	EMBL-CDS:GBF61592.1	#FF0000	Trichophyton mentagrophytes.	A0A2P2EKK9	236	A0A2P2EKK9	Trichophyton mentagrophytes
1	664	Uncharacterized protein	DS995709	MCYG_08663	C5G141	GI:238846182|GI:296803959|EMBL-CDS:EEQ35844.1|REFSEQ:XP_002842832.1	#FF0000	Arthroderma otae (strain ATCC MYA-4605 / CBS 113480)	C5G141	361	C5G141	Microsporum canis CBS 113480
1	664	Uncharacterized protein	GG698906	NECHADRAFT_105522	C7Z1S3	GI:302898040|GI:256728696|EMBL-CDS:EEU42052.1|REFSEQ:XP_003047765.1	#FF0000	Nectria haematococca (strain 77-13-4 / ATCC MYA-4622 / FGSC 9596 /MPVI)	C7Z1S3	321	C7Z1S3	[Nectria] haematococca mpVI 77-13-4
1	664	Uncharacterized protein	ACYE01000457	TRV_07623	D4DKA2	GI:302653070|GI:291182007|EMBL-CDS:EFE37723.1|REFSEQ:XP_003018368.1	#FF0000	Trichophyton verrucosum (strain HKI 0517)	D4DKA2	236	D4DKA2	Trichophyton verrucosum HKI 0517
1	664	Endoglucanase	DS995727	TEQG_02538	F2PNP0	GI:326479498|EMBL-CDS:EGE03508.1	#FF0000	Trichophyton equinum (strain ATCC MYA-4606 / CBS 127.97)	F2PNP0	236	F2PNP0	Trichophyton equinum CBS 127.97
1	664	RNA polymerase Rpb1 C-terminal repeat domain protein	DF126551	AKAW_11401	G7Y280	GI:358376771|EMBL-CDS:GAA93289.1	#FF0000	Aspergillus kawachii (strain NBRC 4308)	G7Y280	213	G7Y280	Aspergillus kawachii IFO 4308
1	664	Related to spore coat protein SP96	CAGA01000011	CPUR_02662	M1W077	EMBL-CDS:CCE28971.1	#FF0000	Claviceps purpurea (strain 20.1)	M1W077	356	M1W077	Claviceps purpurea 20.1
1	664	Uncharacterized protein	KB446555	MYCFIDRAFT_129503	N1Q690	GI:452988030|GI:631373438|EMBL-CDS:EME87785.1|REFSEQ:XP_007921099.1	#FF0000	Pseudocercospora fijiensis (strain CIRAD86)	N1Q690	221	N1Q690	Pseudocercospora fijiensis CIRAD86
1	664	Uncharacterized protein	JQGA01000264	PITC_018240	A0A0A2L8U0	GI:700492336|EMBL-CDS:KGO76384.1	#FF0000	Penicillium italicum	A0A0A2L8U0	393	A0A0A2L8U0	Penicillium italicum
1	664	Uncharacterized protein	KV458820	VF21_04820	A0A1B8EXT6	GI:1040539657|EMBL-CDS:OBT76145.1	#FF0000	Pseudogymnoascus sp. 05NY08.	A0A1B8EXT6	491	A0A1B8EXT6	Pseudogymnoascus sp. 05NY08
1	664	Uncharacterized protein	KV878222	ASPWEDRAFT_63480	A0A1L9R3Q2	GI:1111846630|EMBL-CDS:OJJ29546.1	#FF0000	Aspergillus wentii DTO 134E9.	A0A1L9R3Q2	331	A0A1L9R3Q2	Aspergillus wentii DTO 134E9
1	664	Uncharacterized protein	NAEU01001372	B0A51_16803	A0A1V8TWJ9	GI:1172601054|EMBL-CDS:OQO15673.1	#FF0000	Rachicladosporium sp. CCFEE 5018.	A0A1V8TWJ9	524	A0A1V8TWJ9	Rachicladosporium sp. CCFEE 5018
1	664	Endoglucanase	NEXV01000016	AARAC_006383	A0A2G7GBP9	EMBL-CDS:PIG90262.1	#FF0000	Aspergillus arachidicola.	A0A2G7GBP9	255	A0A2G7GBP9	Aspergillus arachidicola
1	664	Uncharacterized protein	MVDW01000006	BST61_czeina6g001600	A0A2I0S7A6	EMBL-CDS:PKS03644.1	#FF0000	Cercospora zeina.	A0A2I0S7A6	522	A0A2I0S7A6	Cercospora zeina
1	664	Uncharacterized protein	MSFM01000001	P168DRAFT_332918	A0A2I1DHF7	EMBL-CDS:PKY09301.1	#FF0000	Aspergillus campestris IBT 28561.	A0A2I1DHF7	350	A0A2I1DHF7	Aspergillus campestris IBT 28561
1	664	Extracellular protein| putative	AKCU01000263	PDIP_39220	K9G4M0	GI:953382971|GI:425777688|EMBL-CDS:EKV15847.1|REFSEQ:XP_014535754.1	#FF0000	Penicillium digitatum (strain Pd1 / CECT 20795)	K9G4M0	401	K9G4M0	Penicillium digitatum Pd1
1	664	Extracellular protein| putative	AKCT01000046	PDIG_13000	K9GA10	GI:425779884|EMBL-CDS:EKV17912.1	#FF0000	Penicillium digitatum (strain PHI26 / CECT 20796)	K9GA10	402	K9GA10	Penicillium digitatum PHI26
1	664	Uncharacterized protein	AOKY01000034	H109_00441	A0A059JJ42	GI:633052125|EMBL-CDS:KDB27799.1	#FF0000	Trichophyton interdigitale MR816.	A0A059JJ42	218	A0A059JJ42	Trichophyton interdigitale MR816
1	664	Uncharacterized protein	KL661880	S40285_09678	A0A084Q867	GI:667716748|EMBL-CDS:KFA60152.1	#FF0000	Stachybotrys chlorohalonata (strain IBT 40285)	A0A084Q867	250	A0A084Q867	Stachybotrys chlorohalonata IBT 40285
1	664	Uncharacterized protein	JPKB01000758	V499_04952	A0A094ETT3	GI:682397169|EMBL-CDS:KFY75055.1	#FF0000	Pseudogymnoascus sp. VKM F-103.	A0A094ETT3	861	A0A094ETT3	Pseudogymnoascus sp. VKM F-103
1	664	Uncharacterized protein	JPKC01002566	V500_09081	A0A094FLF5	GI:682412790|EMBL-CDS:KFY84680.1	#FF0000	Pseudogymnoascus sp. VKM F-4518	A0A094FLF5	217	A0A094FLF5	Pseudogymnoascus sp. VKM F-4518 (FW-2643)
1	664	DNA-directed RNA polymerase	LCZI01000383	EMCG_07462	A0A0G2I8A6	GI:821510657|EMBL-CDS:KKZ66857.1	#FF0000	Emmonsia crescens UAMH 3008.	A0A0G2I8A6	350	A0A0G2I8A6	Emmonsia crescens UAMH 3008
1	664	Pdp3-interacting factor 1	BBXM01000009	AUD_0448	A0A0K8L0L4	EMBL-CDS:GAO81488.1	#FF0000	Aspergillus udagawae.	A0A0K8L0L4	485	A0A0K8L0L4	Aspergillus udagawae
1	664	Uncharacterized protein	LLXE01000312	ACN42_g9104	A0A117NLQ2	GI:973783954|EMBL-CDS:KUM58057.1	#FF0000	Penicillium freii.	A0A117NLQ2	373	A0A117NLQ2	Penicillium freii
1	664	Uncharacterized protein	LFZO01000108	AC579_4982	A0A139IG28	GI:1002218684|EMBL-CDS:KXT13640.1	#FF0000	Pseudocercospora musae.	A0A139IG28	558	A0A139IG28	Pseudocercospora musae
1	664	Uncharacterized protein	AZGY01000012	AAL_05439	A0A162IHY9	GI:1024754718|EMBL-CDS:KZZ93723.1	#FF0000	Moelleriella libera RCEF 2490.	A0A162IHY9	228	A0A162IHY9	Moelleriella libera RCEF 2490
1	664	Extracellular protein	LSBJ02000001	VFPPC_12919	A0A179G6C6	GI:1032866300|GI:1069518566|EMBL-CDS:OAQ73068.1|REFSEQ:XP_018149151.1	#FF0000	Pochonia chlamydosporia 170.	A0A179G6C6	369	A0A179G6C6	Pochonia chlamydosporia 170
1	664	Uncharacterized protein	KV460225	VE01_05427	A0A1B8GM10	GI:1040561423|GI:1069470879|EMBL-CDS:OBT96881.2|REFSEQ:XP_018130614.1	#FF0000	Pseudogymnoascus verrucosus.	A0A1B8GM10	606	A0A1B8GM10	Pseudogymnoascus verrucosus
1	664	Uncharacterized protein	LXJU01000004	PENARI_c004G04181	A0A1F5LQG1	GI:1083160991|EMBL-CDS:OGE55442.1	#FF0000	Penicillium arizonense.	A0A1F5LQG1	426	A0A1F5LQG1	Penicillium arizonense
1	664	Uncharacterized protein	LGRN01000214	AJ78_05145	A0A1J9PEX0	GI:1103677361|EMBL-CDS:OJD14530.1	#FF0000	Emergomyces pasteuriana Ep9510.	A0A1J9PEX0	253	A0A1J9PEX0	Emergomyces pasteuriana Ep9510
1	664	Uncharacterized protein	KV878212	ASPWEDRAFT_111693	A0A1L9RLL8	GI:1111852967|EMBL-CDS:OJJ35773.1	#FF0000	Aspergillus wentii DTO 134E9.	A0A1L9RLL8	219	A0A1L9RLL8	Aspergillus wentii DTO 134E9
1	664	Uncharacterized protein	NAEU01001366	B0A51_17001	A0A1V8TWV1	GI:1172601086|EMBL-CDS:OQO15692.1	#FF0000	Rachicladosporium sp. CCFEE 5018.	A0A1V8TWV1	491	A0A1V8TWV1	Rachicladosporium sp. CCFEE 5018
1	664	Uncharacterized protein	LFMY01000003	UA08_02389	A0A225B890	GI:1118542047|GI:1147817588|EMBL-CDS:OKL62157.1|REFSEQ:XP_020122278.1	#FF0000	Talaromyces atroroseus.	A0A225B890	218	A0A225B890	Talaromyces atroroseus
1	664	Uncharacterized protein	NIDN01000219	CFD26_06632	A0A229X1V6	GI:1220555876|EMBL-CDS:OXN13805.1	#FF0000	Aspergillus turcosus.	A0A229X1V6	490	A0A229X1V6	Aspergillus turcosus
1	664	Uncharacterized protein	DS995704	MCYG_04761	C5FPY9	GI:296813373|GI:238842280|EMBL-CDS:EEQ31942.1|REFSEQ:XP_002847024.1	#FF0000	Arthroderma otae (strain ATCC MYA-4605 / CBS 113480)	C5FPY9	236	C5FPY9	Microsporum canis CBS 113480
1	664	Extracellular protein| putative	JH126402	CCM_05192	G3JI82	GI:573984959|GI:346321436|EMBL-CDS:EGX91035.1|REFSEQ:XP_006670400.1	#FF0000	Cordyceps militaris (strain CM01)	G3JI82	549	G3JI82	Cordyceps militaris CM01
1	664	Related to spore coat protein SP96	CAGA01000049	CPUR_06888	M1W3R6	EMBL-CDS:CCE32966.1	#FF0000	Claviceps purpurea (strain 20.1)	M1W3R6	220	M1W3R6	Claviceps purpurea 20.1
1	664	Uncharacterized protein	KB446535	DOTSEDRAFT_121984	N1Q511	GI:452847972|EMBL-CDS:EME49904.1	#FF0000	Dothistroma septosporum (strain NZE10 / CBS 128990)	N1Q511	229	N1Q511	Dothistroma septosporum NZE10
1	664	Uncharacterized protein	KE721523	EPUS_02752	U1G9C9	GI:629666195|GI:539431120|EMBL-CDS:ERF68296.1|REFSEQ:XP_007806071.1	#FF0000	Endocarpon pusillum (strain Z07020 / HMAS-L-300199)	U1G9C9	369	U1G9C9	Endocarpon pusillum Z07020
1	664	Uncharacterized protein	JPKD01000275	V501_00781	A0A094KC23	GI:682463957|EMBL-CDS:KFZ19183.1	#FF0000	Pseudogymnoascus sp. VKM F-4519	A0A094KC23	217	A0A094KC23	Pseudogymnoascus sp. VKM F-4519 (FW-2642)
1	664	Uncharacterized protein	CVMT01000009	PISL3812_08186	A0A0U1M6F7	EMBL-CDS:CRG91138.1	#FF0000	Talaromyces islandicus	A0A0U1M6F7	222	A0A0U1M6F7	Talaromyces islandicus
1	664	Uncharacterized protein	MUNK01000007	BTJ68_01442	A0A1Z5TSC9	GI:1190793652|EMBL-CDS:OTA38888.1	#FF0000	Hortaea werneckii EXF-2000.	A0A1Z5TSC9	621	A0A1Z5TSC9	Hortaea werneckii EXF-2000
1	664	Uncharacterized protein	LKMD01000100	CB0940_01401	A0A2G5IC59	EMBL-CDS:PIB02351.1	#FF0000	Cercospora beticola	A0A2G5IC59	429	A0A2G5IC59	Cercospora beticola
1	664	Extracellular protein| putative	CP023322	A9K55_002569	A0A2H4S5E9	GI:1283007607|EMBL-CDS:ATY58330.1	#FF0000	Cordyceps militaris	A0A2H4S5E9	441	A0A2H4S5E9	Cordyceps militaris
1	664	Uncharacterized protein	KZ559191	BDW47DRAFT_113182	A0A2I2EZV0	EMBL-CDS:PLB33911.1	#FF0000	Aspergillus candidus.	A0A2I2EZV0	366	A0A2I2EZV0	Aspergillus candidus
1	664	Uncharacterized protein	NKHZ01000068	CAC42_4166	A0A2K1QKN5	EMBL-CDS:PNS15714.1	#FF0000	Elsinoe sp. CQ-2017a.	A0A2K1QKN5	494	A0A2K1QKN5	Elsinoe sp. CQ-2017a
1	664	Uncharacterized protein	BFBS01015963	TMEN_3679	A0A2P2EJF5	EMBL-CDS:GBF61201.1	#FF0000	Trichophyton mentagrophytes.	A0A2P2EJF5	218	A0A2P2EJF5	Trichophyton mentagrophytes
1	664	Putative endoglucanase	JZDT01000218	AFLA70_22g005350	A0A2P2H568	GI:914755892|EMBL-CDS:KOC10057.1	#FF0000	Aspergillus flavus (strain ATCC MYA-384 / AF70)	A0A2P2H568	255	A0A2P2H568	Aspergillus flavus AF70
1	664	Podospora anserina S mat+ genomic DNA chromosome 3| supercontig 2	CU638743	PODANS_3_9420	B2B161	GI:171689622|GI:170944773|GI:681097436|EMBL-CDS:CAP70884.1|EMBL-CDS:CDP27480.1|REFSEQ:XP_001909751.1	#FF0000	Podospora anserina (strain S / ATCC MYA-4624 / DSM 980 / FGSC 10383)	B2B161	413	B2B161	Podospora anserina S mat+
1	664	Endoglucanase	DS995803	TEQG_08348	F2Q5H0	GI:326485357|EMBL-CDS:EGE09367.1	#FF0000	Trichophyton equinum (strain ATCC MYA-4606 / CBS 127.97)	F2Q5H0	218	F2Q5H0	Trichophyton equinum CBS 127.97
1	664	Uncharacterized protein	JPJU01002693	V492_07722	A0A093YPA6	GI:682289767|EMBL-CDS:KFY06801.1	#FF0000	Pseudogymnoascus sp. VKM F-4246.	A0A093YPA6	216	A0A093YPA6	Pseudogymnoascus sp. VKM F-4246
1	664	Uncharacterized protein	JPJW01000549	V494_01657	A0A094BWR8	GI:682353296|EMBL-CDS:KFY44063.1	#FF0000	Pseudogymnoascus sp. VKM F-4513	A0A094BWR8	216	A0A094BWR8	Pseudogymnoascus sp. VKM F-4513 (FW-928)
1	664	Uncharacterized protein	ANFO01000402	BBAD15_g4856	A0A0A2VQD0	GI:701775805|EMBL-CDS:KGQ09803.1	#FF0000	Beauveria bassiana D1-5.	A0A0A2VQD0	231	A0A0A2VQD0	Beauveria bassiana D1-5
1	664	Putative endoglucanase	JNOM01000006	ANOM_000818	A0A0L1JH43	GI:910299586|GI:992231048|EMBL-CDS:KNG91090.1|REFSEQ:XP_015412013.1	#FF0000	Aspergillus nomius NRRL 13137.	A0A0L1JH43	269	A0A0L1JH43	Aspergillus nomius NRRL 13137
1	664	Uncharacterized protein	AZGY01000001	AAL_00880	A0A166RR56	GI:1025645668|EMBL-CDS:OAA33415.1	#FF0000	Moelleriella libera RCEF 2490.	A0A166RR56	387	A0A166RR56	Moelleriella libera RCEF 2490
1	664	Endoglucanase	AZHC01000018	NOR_05782	A0A167C286	GI:1025653181|EMBL-CDS:OAA40694.1	#FF0000	Metarhizium rileyi RCEF 4871.	A0A167C286	233	A0A167C286	Metarhizium rileyi RCEF 4871
1	664	Uncharacterized protein	LCTW02000138	MMYC01_207937	A0A175W337	GI:1003742093|EMBL-CDS:KXX77975.1	#FF0000	Madurella mycetomatis.	A0A175W337	545	A0A175W337	Madurella mycetomatis
1	664	RNA polymerase Rpb1 repeat domain-containing protein	LSBJ02000001	VFPPC_01852	A0A179G9Z9	GI:1032867552|GI:1069517418|EMBL-CDS:OAQ74320.1|REFSEQ:XP_018150403.1	#FF0000	Pochonia chlamydosporia 170.	A0A179G9Z9	230	A0A179G9Z9	Pochonia chlamydosporia 170
1	664	Uncharacterized protein	LVWM01000224	AUREO_034660	A0A1A7MKK3	GI:1041761606|EMBL-CDS:OBW66474.1	#FF0000	Aureobasidium pullulans	A0A1A7MKK3	439	A0A1A7MKK3	Aureobasidium pullulans
1	664	Uncharacterized protein	KV454601	VE00_05022	A0A1B8CDA6	GI:1040503019|EMBL-CDS:OBT44816.1	#FF0000	Pseudogymnoascus sp. WSF 3629.	A0A1B8CDA6	217	A0A1B8CDA6	Pseudogymnoascus sp. WSF 3629
1	664	Uncharacterized protein	NJEV01000021	CDD83_4020	A0A2C6AHV4	EMBL-CDS:PHH92877.1	#FF0000	Cordyceps sp. RAO-2017.	A0A2C6AHV4	237	A0A2C6AHV4	Cordyceps sp. RAO-2017
1	664	Uncharacterized protein	MTYH01000102	TGAMA5MH_09414	A0A2K0SZJ1	EMBL-CDS:PNP38688.1	#FF0000	Trichoderma gamsii.	A0A2K0SZJ1	235	A0A2K0SZJ1	Trichoderma gamsii
1	664	Endoglucanase| putative	EQ963480	AFLA_089550	B8NK81	GI:220692529|GI:238499083|EMBL-CDS:EED48875.1|REFSEQ:XP_002380776.1	#FF0000	Aspergillus flavus (strain ATCC 200026 / FGSC A1120 / NRRL 3357 / JCM12722 / SRRC 167)	B8NK81	255	B8NK81	Aspergillus flavus NRRL3357
1	664	Endoglucanase	DS995726	TEQG_02369	F2PN68	GI:326479326|EMBL-CDS:EGE03336.1	#FF0000	Trichophyton equinum (strain ATCC MYA-4606 / CBS 127.97)	F2PN68	218	F2PN68	Trichophyton equinum CBS 127.97
1	664	Endoglucanase| putative	AKHY01000108	Ao3042_02311	I8IPI4	GI:391872078|EMBL-CDS:EIT81221.1	#FF0000	Aspergillus oryzae (strain 3.042)	I8IPI4	255	I8IPI4	Aspergillus oryzae 3.042
1	664	Extracellular protein	JH725156	BBA_03470	J4WC84	GI:667649915|GI:400599999|EMBL-CDS:EJP67690.1|REFSEQ:XP_008596789.1	#FF0000	Beauveria bassiana (strain ARSEF 2860)	J4WC84	231	J4WC84	Beauveria bassiana ARSEF 2860
1	664	Uncharacterized protein	CH408035	CHGG_10458	Q2GNJ6	GI:88176586|GI:116205149|EMBL-CDS:EAQ84054.1|REFSEQ:XP_001228385.1	#FF0000	Chaetomium globosum (strain ATCC 6205 / CBS 148.51 / DSM 1962 / NBRC6347 / NRRL 1970)	Q2GNJ6	421	Q2GNJ6	Chaetomium globosum CBS 148.51
1	664	Uncharacterized protein	JPJV01001022	V493_02737	A0A094AHJ9	GI:682328848|EMBL-CDS:KFY28834.1	#FF0000	Pseudogymnoascus sp. VKM F-4281	A0A094AHJ9	217	A0A094AHJ9	Pseudogymnoascus sp. VKM F-4281 (FW-2241)
1	664	Uncharacterized protein	JPKD01001762	V501_05535	A0A094H2H8	GI:682449748|EMBL-CDS:KFZ09545.1	#FF0000	Pseudogymnoascus sp. VKM F-4519	A0A094H2H8	549	A0A094H2H8	Pseudogymnoascus sp. VKM F-4519 (FW-2642)
1	664	Uncharacterized protein	JPKE01002256	V502_05905	A0A094HHE1	GI:682457143|EMBL-CDS:KFZ14795.1	#FF0000	Pseudogymnoascus sp. VKM F-4520	A0A094HHE1	217	A0A094HHE1	Pseudogymnoascus sp. VKM F-4520 (FW-2644)
1	664	Uncharacterized protein	CDPU01000001	BN869_000000781_1	A0A0B7JQD3	EMBL-CDS:CEO44726.1	#FF0000	Bionectria ochroleuca	A0A0B7JQD3	237	A0A0B7JQD3	Clonostachys rosea
1	664	Uncharacterized protein	LAEV01000758	TD95_001367	A0A0F4ZHT8	GI:802103543|EMBL-CDS:KKA29671.1	#FF0000	Thielaviopsis punctulata.	A0A0F4ZHT8	281	A0A0F4ZHT8	Thielaviopsis punctulata
1	664	Uncharacterized protein	AZHC01000001	NOR_00075	A0A167KB87	GI:1025664032|EMBL-CDS:OAA51482.1	#FF0000	Metarhizium rileyi RCEF 4871.	A0A167KB87	309	A0A167KB87	Metarhizium rileyi RCEF 4871
1	664	Extracellular protein	LSBJ02000014	VFPPC_10934	A0A179EZT3	GI:1032851792|GI:1069543011|EMBL-CDS:OAQ58704.1|REFSEQ:XP_018136823.1	#FF0000	Pochonia chlamydosporia 170.	A0A179EZT3	232	A0A179EZT3	Pochonia chlamydosporia 170
1	664	Uncharacterized protein	KV456017	VE04_03039	A0A1B8DFL6	GI:1040518976|GI:1040518973|EMBL-CDS:OBT57948.1|EMBL-CDS:OBT57951.1	#FF0000	Pseudogymnoascus sp. 24MN13.	A0A1B8DFL6	200	A0A1B8DFL6	Pseudogymnoascus sp. 24MN13
1	664	Uncharacterized protein	MKZY01000009	OAory_01072470	A0A1S9D9G5	GI:1150470961|EMBL-CDS:OOO05731.1	#FF0000	Aspergillus oryzae	A0A1S9D9G5	219	A0A1S9D9G5	Aspergillus oryzae
1	664	Uncharacterized protein	PDND01000037	GX50_02587	A0A2B7ZDR0	EMBL-CDS:PGH34604.1	#FF0000	Emmonsia crescens.	A0A2B7ZDR0	349	A0A2B7ZDR0	Emmonsia crescens
1	664	Uncharacterized protein	NQLC01000153	CI102_8118	A0A2N1LMU0	EMBL-CDS:PKK50687.1	#FF0000	Trichoderma harzianum	A0A2N1LMU0	439	A0A2N1LMU0	Trichoderma harzianum
1	664	Extracellular protein| putative	GL698552	MAC_07696	E9ECU8	GI:322694412|GI:629697489|EMBL-CDS:EFY86242.1|REFSEQ:XP_007814036.1	#FF0000	Metarhizium acridum (strain CQMa 102)	E9ECU8	219	E9ECU8	Metarhizium acridum CQMa 102
1	664	Related to spore coat protein SP96	CAGA01000011	CPUR_02663	M1VV63	EMBL-CDS:CCE28972.1	#FF0000	Claviceps purpurea (strain 20.1)	M1VV63	320	M1VV63	Claviceps purpurea 20.1
1	664	Uncharacterized protein	AP007165	AO090124000048	Q2U767	GI:83772469|GI:169778532|EMBL-CDS:BAE62598.1|REFSEQ:XP_001823731.1	#FF0000	Aspergillus oryzae (strain ATCC 42149 / RIB 40)	Q2U767	255	Q2U767	Aspergillus oryzae RIB40
1	664	Uncharacterized protein	KE652796	OCS_03783	T5ADK8	GI:531863122|EMBL-CDS:EQL00501.1	#FF0000	Ophiocordyceps sinensis (strain Co18 / CGMCC 3.14243)	T5ADK8	240	T5ADK8	Ophiocordyceps sinensis CO18
1	664	Uncharacterized protein	JPKB01001198	V499_07346	A0A094E7S5	GI:682393202|EMBL-CDS:KFY72533.1	#FF0000	Pseudogymnoascus sp. VKM F-103.	A0A094E7S5	217	A0A094E7S5	Pseudogymnoascus sp. VKM F-103
1	664	Endoglucanase	DF933843	TCE0_047f17718	A0A0B8MYX1	GI:748550907|EMBL-CDS:GAM43145.1	#FF0000	Talaromyces cellulolyticus.	A0A0B8MYX1	216	A0A0B8MYX1	Talaromyces cellulolyticus
1	664	Uncharacterized protein	JZEE01000051	P875_00076295	A0A0F0IKK1	GI:770311603|EMBL-CDS:KJK68225.1	#FF0000	Aspergillus parasiticus (strain ATCC 56775 / NRRL 5862 / SRRC 143 /SU-1)	A0A0F0IKK1	219	A0A0F0IKK1	Aspergillus parasiticus SU-1
1	664	Uncharacterized protein	LFRF01000040	TOPH_08165	A0A0L0N085	GI:908386445|EMBL-CDS:KND87190.1	#FF0000	Tolypocladium ophioglossoides CBS 100239.	A0A0L0N085	224	A0A0L0N085	Tolypocladium ophioglossoides CBS 100239
1	664	Uncharacterized protein	AZHF01000003	LEL_05502	A0A168I393	GI:1025691396|EMBL-CDS:OAA78679.1	#FF0000	Cordyceps confragosa RCEF 1005.	A0A168I393	225	A0A168I393	Cordyceps confragosa RCEF 1005
1	664	Uncharacterized protein	KV441393	VC83_03706	A0A177AC08	GI:1026907449|EMBL-CDS:OAF59649.1	#FF0000	Pseudogymnoascus destructans.	A0A177AC08	442	A0A177AC08	Pseudogymnoascus destructans
1	664	Uncharacterized protein	KV455002	VE03_05046	A0A1B8E2U9	GI:1040528526|EMBL-CDS:OBT65572.1	#FF0000	Pseudogymnoascus sp. 23342-1-I1.	A0A1B8E2U9	217	A0A1B8E2U9	Pseudogymnoascus sp. 23342-1-I1
1	664	Uncharacterized protein	KV460219	VE01_03908	A0A1B8GQ80	GI:1040562557|GI:1069468835|EMBL-CDS:OBT97982.1|REFSEQ:XP_018131715.1	#FF0000	Pseudogymnoascus verrucosus.	A0A1B8GQ80	200	A0A1B8GQ80	Pseudogymnoascus verrucosus
1	664	Putative endoglucanase	MSFO01000004	P170DRAFT_357623	A0A2I2GA53	EMBL-CDS:PLB49762.1	#FF0000	Aspergillus steynii IBT 23096.	A0A2I2GA53	215	A0A2I2GA53	Aspergillus steynii IBT 23096
1	664	Uncharacterized protein	JPDN02000051	TGAM01_v209817	A0A2P4ZAT1	GI:1087785559|EMBL-CDS:PON21366.1|REFSEQ:XP_018655849.1	#FF0000	Trichoderma gamsii.	A0A2P4ZAT1	235	A0A2P4ZAT1	Trichoderma gamsii
1	664	Uncharacterized protein	GG663368	HCBG_05126	C0NPP6	GI:225558622|EMBL-CDS:EEH06906.1	#FF0000	Ajellomyces capsulatus (strain G186AR / H82 / ATCC MYA-2454 / RMSCC2432)	C0NPP6	344	C0NPP6	Histoplasma capsulatum G186AR
1	664	Extracellular protein	GG692431	HCDG_07447	C6HMY1	GI:240275063|EMBL-CDS:EER38578.1	#FF0000	Ajellomyces capsulatus (strain H143)	C6HMY1	344	C6HMY1	Histoplasma capsulatum H143
2	497	Uncharacterized protein	CM002240	NCU01380	Q1K703	GI:28922470|GI:85100300|EMBL-CDS:EAA31701.1|REFSEQ:XP_960937.1	#0000FF	Neurospora crassa (strain ATCC 24698 / 74-OR23-1A / CBS 708.71 / DSM1257 / FGSC 987)	Q1K703	413	Q1K703	Neurospora crassa OR74A
2	497	Lytic polysaccharide monooxygenase	KN389743	GE21DRAFT_7814	Q9HEJ0	GI:11595656|GI:725977443|EMBL-CDS:CAC18278.1|EMBL-CDS:KHE80830.1	#0000FF	Neurospora crassa.	Q9HEJ0	413	Q9HEJ0	Neurospora crassa
2	497	Uncharacterized protein	AXCR01000010	SPSK_04338	A0A0F2M2C2	GI:780592485|GI:1027000813|EMBL-CDS:KJR83244.1|REFSEQ:XP_016585920.1	#0000FF	Sporothrix schenckii 1099-18.	A0A0F2M2C2	416	A0A0F2M2C2	Sporothrix schenckii 1099-18
2	497	Uncharacterized protein	JH657920	FOTG_02366	X0MJU3	GI:591504524|EMBL-CDS:EXM33847.1	#0000FF	Fusarium oxysporum f. sp. vasinfectum 25433.	X0MJU3	409	X0MJU3	Fusarium oxysporum f. sp. vasinfectum 25433
2	497	Chitin-binding| domain 3	AZHE01000003	MAM_02218	A0A0B2X4F3	GI:734663247|EMBL-CDS:KHO00295.1	#0000FF	Metarhizium album ARSEF 1941.	A0A0B2X4F3	406	A0A0B2X4F3	Metarhizium album ARSEF 1941
2	497	Uncharacterized protein	DS231703	FOXG_07797	A0A0D2XUY9	GI:1070327598|GI:902733982|EMBL-CDS:KNB05551.1|REFSEQ:XP_018243596.1	#0000FF	Fusarium oxysporum f. sp. lycopersici (strain 4287 / CBS 123668 / FGSC9935 / NRRL 34936)	A0A0D2XUY9	404	A0A0D2XUY9	Fusarium oxysporum f. sp. lycopersici 4287
2	497	Uncharacterized protein	JH717839	FOYG_01595	W9J4P3	GI:587679931|EMBL-CDS:EWZ02249.1	#0000FF	Fusarium oxysporum FOSC 3-a.	W9J4P3	404	W9J4P3	Fusarium oxysporum FOSC 3-a
2	497	Uncharacterized protein	JH659330	FOMG_04006	X0AYH8	GI:590043805|EMBL-CDS:EXK45663.1	#0000FF	Fusarium oxysporum f. sp. melonis 26406.	X0AYH8	404	X0AYH8	Fusarium oxysporum f. sp. melonis 26406
2	497	Chitin-binding| domain 3	JH725169	BBA_06706	J4KMP7	GI:400596553|GI:667656387|EMBL-CDS:EJP64324.1|REFSEQ:XP_008600025.1	#0000FF	Beauveria bassiana (strain ARSEF 2860)	J4KMP7	403	J4KMP7	Beauveria bassiana ARSEF 2860
2	497	Uncharacterized protein	ANFO01000710	BBAD15_g7428	A0A0A2VMA6	GI:701772720|EMBL-CDS:KGQ07255.1	#0000FF	Beauveria bassiana D1-5.	A0A0A2VMA6	403	A0A0A2VMA6	Beauveria bassiana D1-5
2	497	Uncharacterized protein	JRVG01000076	LW93_8442	A0A0I9Y785	GI:829114812|EMBL-CDS:KLO91198.1	#0000FF	Gibberella fujikuroi	A0A0I9Y785	401	A0A0I9Y785	Fusarium fujikuroi
2	497	Spore coat protein sp96	JXCE01000019	FLAG1_02095	A0A0M9F2X9	GI:927761974|EMBL-CDS:KPA44953.1	#0000FF	Fusarium langsethiae.	A0A0M9F2X9	403	A0A0M9F2X9	Fusarium langsethiae
2	497	Chitin-binding| domain 3	AZHB01000002	ISF_01325	A0A162JQE7	GI:1025684957|GI:1089717612|EMBL-CDS:OAA72252.1|REFSEQ:XP_018707698.1	#0000FF	Cordyceps fumosorosea ARSEF 2679.	A0A162JQE7	427	A0A162JQE7	Cordyceps fumosorosea ARSEF 2679
2	497	Uncharacterized protein	KI440845	HMPREF1624_04292	U7PVZ3	GI:550807182|EMBL-CDS:ERS99096.1	#0000FF	Sporothrix schenckii (strain ATCC 58251 / de Perez 2211183)	U7PVZ3	416	U7PVZ3	Sporothrix schenckii ATCC 58251
2	497	Related to spore coat protein SP96	FJOF01000003	FPRO_05982	A0A1L7VDR1	EMBL-CDS:CZR38827.1	#0000FF	Fusarium proliferatum (strain ET1)	A0A1L7VDR1	392	A0A1L7VDR1	Fusarium proliferatum ET1
2	497	Uncharacterized protein	MRVG01000016	BM221_010301	A0A2N6N982	EMBL-CDS:PMB63830.1	#0000FF	Beauveria bassiana	A0A2N6N982	403	A0A2N6N982	Beauveria bassiana
2	497	Uncharacterized protein	HG970334	FGRAMPH1_01T19453	I1RPV5	GI:699035765|GI:758204703|GI:558862052|EMBL-CDS:CEF86154.1|REFSEQ:XP_011324711.1	#0000FF	Gibberella zeae (strain PH-1 / ATCC MYA-4620 / FGSC 9075 / NRRL 31084)	I1RPV5	408	I1RPV5	Fusarium graminearum PH-1
2	497	Uncharacterized protein	LAEV01001030	TD95_002188	A0A0F4ZGK6	GI:802102638|EMBL-CDS:KKA29038.1	#0000FF	Thielaviopsis punctulata.	A0A0F4ZGK6	411	A0A0F4ZGK6	Thielaviopsis punctulata
2	497	Related to spore coat protein SP96	FCQH01000002	FMAN_05721	A0A1L7SKV0	EMBL-CDS:CVK87139.1	#0000FF	Fusarium mangiferae	A0A1L7SKV0	396	A0A1L7SKV0	Fusarium mangiferae
2	497	GH61 polysaccharide monooxygenase	LFMI01000799	A9Z42_0086860	A0A2H2ZSV9	GI:1190650980|EMBL-CDS:OTA07792.1	#0000FF	Trichoderma parareesei.	A0A2H2ZSV9	410	A0A2H2ZSV9	Trichoderma parareesei
2	497	Uncharacterized protein	DS022246	FVEG_04722	W7M6L5	GI:1092966459|GI:584133741|EMBL-CDS:EWG43114.1|REFSEQ:XP_018749305.1	#0000FF	Gibberella moniliformis (strain M3125 / FGSC 7600)	W7M6L5	413	W7M6L5	Fusarium verticillioides 7600
2	497	Uncharacterized protein	CDPU01000035	BN869_000009495_1	A0A0B7KDA1	EMBL-CDS:CEO53437.1	#0000FF	Bionectria ochroleuca	A0A0B7KDA1	379	A0A0B7KDA1	Clonostachys rosea
2	497	Uncharacterized protein	NQOC01000056	FGRA07_06129	A0A2H3FX69	EMBL-CDS:PCD19324.1	#0000FF	Gibberella zeae	A0A2H3FX69	404	A0A2H3FX69	Fusarium graminearum
2	497	Uncharacterized protein	AFNW01000084	FPSE_04243	K3W1B3	GI:685857207|GI:408396442|EMBL-CDS:EKJ75600.1|REFSEQ:XP_009255636.1	#0000FF	Fusarium pseudograminearum (strain CS3096)	K3W1B3	404	K3W1B3	Fusarium pseudograminearum CS3096
2	497	Uncharacterized protein	JPJZ01001150	V497_06928	A0A094D7J1	GI:682369931|EMBL-CDS:KFY55465.1	#0000FF	Pseudogymnoascus sp. VKM F-4516	A0A094D7J1	409	A0A094D7J1	Pseudogymnoascus sp. VKM F-4516 (FW-969)
2	497	Uncharacterized protein	LYXU01000003	FPOA_08216	A0A1B8AMT1	GI:1040029153|EMBL-CDS:OBS21880.1	#0000FF	Fusarium poae.	A0A1B8AMT1	402	A0A1B8AMT1	Fusarium poae
2	497	Uncharacterized protein	CDPU01000141	BN869_000013818_1	A0A0B7KS01	EMBL-CDS:CEO57760.1	#0000FF	Bionectria ochroleuca	A0A0B7KS01	265	A0A0B7KS01	Clonostachys rosea
2	497	Uncharacterized protein	MVNX01000038	BUE80_DR004715	A0A2H3EZ87	EMBL-CDS:PBP24462.1	#0000FF	Diplocarpon rosae.	A0A2H3EZ87	436	A0A2H3EZ87	Diplocarpon rosae
2	497	Related to spore coat protein SP96	FMJU01000004	FFC1_06340	A0A2H3RPD4	EMBL-CDS:SCN91247.1	#0000FF	Gibberella fujikuroi	A0A2H3RPD4	394	A0A2H3RPD4	Fusarium fujikuroi
2	497	Uncharacterized protein	LXJU01000346	PENARI_c346G02656	A0A1F5KZI9	GI:1083151396|EMBL-CDS:OGE46197.1	#0000FF	Penicillium arizonense.	A0A1F5KZI9	132	A0A1F5KZI9	Penicillium arizonense
2	497	Uncharacterized protein	MTYI01000037	THARTR1_02909	A0A2K0UH36	EMBL-CDS:PNP57067.1	#0000FF	Trichoderma harzianum	A0A2K0UH36	427	A0A2K0UH36	Trichoderma harzianum
2	497	Uncharacterized protein	KL647379	S7711_08632	A0A084BCL2	GI:666410785|EMBL-CDS:KEY75291.1	#0000FF	Stachybotrys chartarum (strain CBS 109288 / IBT 7711)	A0A084BCL2	320	A0A084BCL2	Stachybotrys chartarum IBT 7711
2	497	Uncharacterized protein	CM003104	VM1G_06873	A0A194W446	GI:972144990|EMBL-CDS:KUI71239.1	#0000FF	Valsa mali.	A0A194W446	375	A0A194W446	Valsa mali
2	497	Uncharacterized protein	KV456002	VE04_01472	A0A1B8DGP8	GI:1040519339|EMBL-CDS:OBT58285.1	#0000FF	Pseudogymnoascus sp. 24MN13.	A0A1B8DGP8	372	A0A1B8DGP8	Pseudogymnoascus sp. 24MN13
2	497	Uncharacterized protein	LAZP02000406	XA68_15032	A0A2A9P817	EMBL-CDS:PFH57458.1	#0000FF	Ophiocordyceps unilateralis.	A0A2A9P817	487	A0A2A9P817	Ophiocordyceps unilateralis
2	497	Uncharacterized protein	MVNX01000384	BUE80_DR013722	A0A2H3EX75	EMBL-CDS:PBP15538.1	#0000FF	Diplocarpon rosae.	A0A2H3EX75	357	A0A2H3EX75	Diplocarpon rosae
2	497	Uncharacterized protein	AWTV01000004	SPBR_05947	A0A0C2IYL0	GI:748543839|EMBL-CDS:KIH94141.1	#0000FF	Sporothrix brasiliensis 5110.	A0A0C2IYL0	442	A0A0C2IYL0	Sporothrix brasiliensis 5110
2	497	Uncharacterized protein	LFRF01000003	TOPH_01584	A0A0L0NIV6	GI:908393367|EMBL-CDS:KND93978.1	#0000FF	Tolypocladium ophioglossoides CBS 100239.	A0A0L0NIV6	404	A0A0L0NIV6	Tolypocladium ophioglossoides CBS 100239
2	497	Uncharacterized protein	LFZN01000030	AC578_1578	A0A139HM33	GI:1002207934|EMBL-CDS:KXT03419.1	#0000FF	Mycosphaerella eumusae.	A0A139HM33	436	A0A139HM33	Mycosphaerella eumusae
2	497	Uncharacterized protein	NJET01000135	CDD81_1375	A0A2C5Y113	EMBL-CDS:PHH60654.1	#0000FF	Ophiocordyceps australis.	A0A2C5Y113	402	A0A2C5Y113	Ophiocordyceps australis
2	497	Uncharacterized protein	NJEU01000032	CDD82_4015	A0A2C5ZT46	EMBL-CDS:PHH83000.1	#0000FF	Ophiocordyceps australis.	A0A2C5ZT46	421	A0A2C5ZT46	Ophiocordyceps australis
2	497	Related to spore coat protein SP96	FMJY01000003	FRV6_06384	A0A2H3T175	EMBL-CDS:SCO82171.1	#0000FF	Fusarium oxysporum	A0A2H3T175	408	A0A2H3T175	Fusarium oxysporum
2	497	Uncharacterized protein	ABDG02000027	TRIATDRAFT_302363	G9P586	GI:358392708|GI:927388961|EMBL-CDS:EHK42112.1|REFSEQ:XP_013940326.1	#0000FF	Hypocrea atroviridis (strain ATCC 20476 / IMI 206040)	G9P586	407	G9P586	Trichoderma atroviride IMI 206040
2	497	Uncharacterized protein	KB730248	FOC1_g10014406	N4UIJ7	GI:477516340|EMBL-CDS:ENH68621.1	#0000FF	Fusarium oxysporum f. sp. cubense (strain race 1)	N4UIJ7	404	N4UIJ7	Fusarium oxysporum f. sp. cubense race 1
2	497	Uncharacterized protein	JPKY01000017	ACRE_025620	A0A086TBE5	GI:672796127|EMBL-CDS:KFH46677.1	#0000FF	Acremonium chrysogenum (strain ATCC 11550 / CBS 779.69 / DSM 880 / JCM23072 / IMI 49137)	A0A086TBE5	377	A0A086TBE5	Acremonium chrysogenum ATCC 11550
2	497	Uncharacterized protein	JOKZ01000067	THAR02_03127	A0A0F9XK41	GI:818165215|EMBL-CDS:KKP04790.1	#0000FF	Trichoderma harzianum	A0A0F9XK41	429	A0A0F9XK41	Trichoderma harzianum
2	497	Chitin-binding| domain 3	AZHF01000005	LEL_07473	A0A168FQ86	GI:1025688195|EMBL-CDS:OAA75485.1	#0000FF	Cordyceps confragosa RCEF 1005.	A0A168FQ86	400	A0A168FQ86	Cordyceps confragosa RCEF 1005
2	497	Pc24g00280 protein	AM920439	Pc24g00280	B6HWJ0	GI:255951844|GI:211904310|EMBL-CDS:CAP86936.1|REFSEQ:XP_002566688.1	#0000FF	Penicillium rubens (strain ATCC 28089 / DSM 1075 / NRRL 1951 /Wisconsin 54-1255)	B6HWJ0	195	B6HWJ0	Penicillium rubens Wisconsin 54-1255
2	497	Uncharacterized protein	MCFJ01000001	BCR38DRAFT_307598	A0A1Y2EI81	GI:1183447133|EMBL-CDS:ORY71280.1	#0000FF	Pseudomassariella vexata.	A0A1Y2EI81	369	A0A1Y2EI81	Pseudomassariella vexata
2	497	Lytic polysaccharide monooxygenase	KZ613502	NA56DRAFT_673019	A0A2J6PSB2	EMBL-CDS:PMD16920.1	#0000FF	Pezoloma ericae.	A0A2J6PSB2	428	A0A2J6PSB2	Pezoloma ericae
2	497	Uncharacterized protein	KZ613981	L207DRAFT_264998	A0A2J6QRL3	EMBL-CDS:PMD28893.1	#0000FF	Meliniomyces variabilis F.	A0A2J6QRL3	444	A0A2J6QRL3	Meliniomyces variabilis F
2	497	Uncharacterized protein	NQLC01000076	CI102_3190	A0A2N1LSV4	EMBL-CDS:PKK52487.1	#0000FF	Trichoderma harzianum	A0A2N1LSV4	431	A0A2N1LSV4	Trichoderma harzianum
2	497	Uncharacterized protein	AFQF01001265	FOXB_03949	F9FC21	GI:342885467|EMBL-CDS:EGU85465.1	#0000FF	Fusarium oxysporum (strain Fo5176)	F9FC21	400	F9FC21	Fusarium oxysporum Fo5176
2	497	Glycoside hydrolase	GL985062	TRIREDRAFT_22129	G0RGT7	GI:340519173|GI:589104759|EMBL-CDS:EGR49412.1|REFSEQ:XP_006964402.1	#0000FF	Hypocrea jecorina (strain QM6a)	G0RGT7	382	G0RGT7	Trichoderma reesei QM6a
2	497	Uncharacterized protein	KB726554	FOC4_g10012713	N1S1A9	GI:475670947|EMBL-CDS:EMT68300.1	#0000FF	Fusarium oxysporum f. sp. cubense (strain race 4)	N1S1A9	404	N1S1A9	Fusarium oxysporum f. sp. cubense race 4
2	497	Uncharacterized protein	JH717897	FOZG_03926	W9KV41	GI:587701727|EMBL-CDS:EWZ48332.1	#0000FF	Fusarium oxysporum Fo47.	W9KV41	420	W9KV41	Fusarium oxysporum Fo47
2	497	Uncharacterized protein	JH658364	FOQG_02415	X0CSG6	GI:590069567|EMBL-CDS:EXK97091.1	#0000FF	Fusarium oxysporum f. sp. raphani 54005.	X0CSG6	406	X0CSG6	Fusarium oxysporum f. sp. raphani 54005
2	497	Uncharacterized protein	KK033187	FOPG_06220	X0J593	GI:591447906|EMBL-CDS:EXL80334.1	#0000FF	Fusarium oxysporum f. sp. conglutinans race 2 54008.	X0J593	400	X0J593	Fusarium oxysporum f. sp. conglutinans race 2 5400
2	497	Uncharacterized protein	JH658275	FOIG_03560	X0K0D5	GI:591475746|EMBL-CDS:EXM06918.1	#0000FF	Fusarium oxysporum f. sp. cubense tropical race 4 54006.	X0K0D5	404	X0K0D5	Fusarium oxysporum f. sp. cubense tropical race 4
2	497	Uncharacterized protein	JPJR01000261	O988_01638	A0A093YDV0	GI:682282353|EMBL-CDS:KFY03211.1	#0000FF	Pseudogymnoascus sp. VKM F-3808.	A0A093YDV0	410	A0A093YDV0	Pseudogymnoascus sp. VKM F-3808
2	497	Uncharacterized protein	KI911144	M419DRAFT_97768	A0A024SBU8	GI:572279706|EMBL-CDS:ETS02825.1	#0000FF	Hypocrea jecorina (strain ATCC 56765 / BCRC 32924 / NRRL 11460 / RutC-30)	A0A024SBU8	362	A0A024SBU8	Trichoderma reesei RUT C-30
2	497	Uncharacterized protein	MTYH01000035	TGAMA5MH_03911	A0A2K0TFK6	EMBL-CDS:PNP44305.1	#0000FF	Trichoderma gamsii.	A0A2K0TFK6	412	A0A2K0TFK6	Trichoderma gamsii
2	497	Uncharacterized protein	NLAX01000008	jhhlp_002603	A0A2N3NEE0	EMBL-CDS:PKS10846.1	#0000FF	Lomentospora prolificans.	A0A2N3NEE0	383	A0A2N3NEE0	Lomentospora prolificans
2	497	Uncharacterized protein	KQ030562	HIM_08833	A0A0F7ZSQ0	GI:799242706|EMBL-CDS:KJZ71748.1	#0000FF	Hirsutella minnesotensis 3608.	A0A0F7ZSQ0	386	A0A0F7ZSQ0	Hirsutella minnesotensis 3608
2	497	Uncharacterized protein	LUKN01001437	LLEC1_05351	A0A179IFC9	GI:1032904631|EMBL-CDS:OAR00993.1	#0000FF	Cordyceps confragosa	A0A179IFC9	424	A0A179IFC9	Cordyceps confragosa
2	497	Putative chitin-domain 3 protein	DF977454	SAMD00023353_0901200	A0A1W2THN8	GI:949389470|EMBL-CDS:GAP87642.1	#0000FF	Rosellinia necatrix	A0A1W2THN8	389	A0A1W2THN8	Rosellinia necatrix
2	497	Uncharacterized protein	JQFZ01000147	PEX2_000160	A0A0A2JR83	GI:1026997727|GI:700468859|EMBL-CDS:KGO57341.1|REFSEQ:XP_016599009.1	#0000FF	Penicillium expansum	A0A0A2JR83	418	A0A0A2JR83	Penicillium expansum
2	497	Uncharacterized protein	MLQL01000230	PENFLA_c230G06486	A0A1V6RV91	GI:1168105464|EMBL-CDS:OQE05672.1	#0000FF	Penicillium flavigenum.	A0A1V6RV91	149	A0A1V6RV91	Penicillium flavigenum
2	497	Uncharacterized protein	LAFY01000346	TI39_contig354g00081	A0A0F4GQ36	GI:796708385|EMBL-CDS:KJX99539.1	#0000FF	Zymoseptoria brevis.	A0A0F4GQ36	425	A0A0F4GQ36	Zymoseptoria brevis
2	497	Uncharacterized protein	LBBL01000042	CFO_g1187	A0A0F8D0Y9	GI:814601897|EMBL-CDS:KKF96467.1	#0000FF	Ceratocystis fimbriata f. sp. platani.	A0A0F8D0Y9	403	A0A0F8D0Y9	Ceratocystis platani
2	497	Uncharacterized protein	APWK03000006	CFIMG_008380RA00001	A0A2C5XK11	EMBL-CDS:PHH55920.1	#0000FF	Ceratocystis fimbriata CBS 114723.	A0A2C5XK11	403	A0A2C5XK11	Ceratocystis fimbriata CBS 114723
2	497	Uncharacterized protein	JPJW01002294	V494_07176	A0A094AX45	GI:682337780|EMBL-CDS:KFY33959.1	#0000FF	Pseudogymnoascus sp. VKM F-4513	A0A094AX45	416	A0A094AX45	Pseudogymnoascus sp. VKM F-4513 (FW-928)
2	497	Uncharacterized protein	LN649231	None	A0A2L2TF44	EMBL-CDS:CEI69602.1	#0000FF	Fusarium venenatum.	A0A2L2TF44	397	A0A2L2TF44	Fusarium venenatum
2	497	Uncharacterized protein	KB822714	HMPREF1541_10308	W2S9C7	GI:568122043|GI:671148151|EMBL-CDS:ETN44638.1|REFSEQ:XP_008713201.1	#0000FF	Cyphellophora europaea CBS 101466.	W2S9C7	441	W2S9C7	Cyphellophora europaea CBS 101466
2	497	Endoglucanase	AZNG01000011	MBR_07348	A0A0B4G0G9	GI:953396854|GI:743642161|EMBL-CDS:KID73472.1|REFSEQ:XP_014542669.1	#0000FF	Metarhizium brunneum ARSEF 3297.	A0A0B4G0G9	472	A0A0B4G0G9	Metarhizium brunneum ARSEF 3297
2	497	Uncharacterized protein	CDPU01000022	BN869_000007319_1	A0A0B7K994	EMBL-CDS:CEO51261.1	#0000FF	Bionectria ochroleuca	A0A0B7K994	296	A0A0B7K994	Clonostachys rosea
2	497	Uncharacterized protein	MZNU01000345	B2J93_9444	A0A218YXL7	GI:1209028229|EMBL-CDS:OWO99694.1	#0000FF	Marssonina coronariae.	A0A218YXL7	453	A0A218YXL7	Marssonina coronariae
2	497	Uncharacterized protein	LT854260	ZT1E4_G8529	A0A2H1GTS4	EMBL-CDS:SMR56932.1	#0000FF	Zymoseptoria tritici ST99CH_1E4.	A0A2H1GTS4	433	A0A2H1GTS4	Zymoseptoria tritici ST99CH_1E4
2	497	Chitin-domain 3	CP023323	A9K55_005735	A0A2H4SCC6	GI:1283010050|EMBL-CDS:ATY60772.1	#0000FF	Cordyceps militaris	A0A2H4SCC6	419	A0A2H4SCC6	Cordyceps militaris
2	497	Uncharacterized protein	JH126400	CCM_03237	G3J9I8	GI:346325368|GI:573981061|EMBL-CDS:EGX94965.1|REFSEQ:XP_006668451.1	#0000FF	Cordyceps militaris (strain CM01)	G3J9I8	419	G3J9I8	Cordyceps militaris CM01
2	497	Uncharacterized protein	AMGY01000001	A1O3_00564	W9ZBX9	GI:590016814|GI:628251709|EMBL-CDS:EXJ92014.1|REFSEQ:XP_007728904.1	#0000FF	Capronia epimyces CBS 606.96.	W9ZBX9	416	W9ZBX9	Capronia epimyces CBS 606.96
2	497	Glycoside hydrolase family 61 protein	JELW01000014	X797_006704	A0A0A1UTE4	GI:594717358|EMBL-CDS:EXV00257.1	#0000FF	Metarhizium robertsii.	A0A0A1UTE4	472	A0A0A1UTE4	Metarhizium robertsii
2	497	Uncharacterized protein	KV454988	VE03_03068	A0A1B8E7Z9	GI:1040530429|EMBL-CDS:OBT67461.1	#0000FF	Pseudogymnoascus sp. 23342-1-I1.	A0A1B8E7Z9	413	A0A1B8E7Z9	Pseudogymnoascus sp. 23342-1-I1
2	497	Uncharacterized protein	JQGA01000628	PITC_008960	A0A0A2L2S2	GI:700489447|EMBL-CDS:KGO74372.1	#0000FF	Penicillium italicum	A0A0A2L2S2	383	A0A0A2L2S2	Penicillium italicum
2	497	Endoglucanase	AZNF01000008	MAN_06428	A0A0B4G779	GI:743632858|EMBL-CDS:KID64254.1	#0000FF	Metarhizium anisopliae ARSEF 549.	A0A0B4G779	428	A0A0B4G779	Metarhizium anisopliae ARSEF 549
2	497	Glycoside hydrolase	AZNE01000020	MAJ_05118	A0A0B4HUX9	GI:953469085|GI:743672092|EMBL-CDS:KID99023.1|REFSEQ:XP_014578017.1	#0000FF	Metarhizium majus ARSEF 297.	A0A0B4HUX9	440	A0A0B4HUX9	Metarhizium majus ARSEF 297
2	497	Glycoside hydrolase	AZNH01000014	MGU_05167	A0A0B4I536	GI:743660691|EMBL-CDS:KID87929.1	#0000FF	Metarhizium guizhouense ARSEF 977.	A0A0B4I536	430	A0A0B4I536	Metarhizium guizhouense ARSEF 977
2	497	Genomic scaffold| ProqFM164S02	HG792016	PROQFM164_S02g002736	W6Q877	GI:584413809|EMBL-CDS:CDM32585.1	#0000FF	Penicillium roqueforti (strain FM164)	W6Q877	252	W6Q877	Penicillium roqueforti FM164
2	497	Rhinocladiella mackenziei CBS 650.93 unplaced genomic scaffold supercont1.1| whole genome shotgun sequence	KN847475	Z518_00815	A0A0D2IUI4	GI:915095379|GI:759333410|EMBL-CDS:KIX09734.1|REFSEQ:XP_013276870.1	#0000FF	Rhinocladiella mackenziei CBS 650.93.	A0A0D2IUI4	426	A0A0D2IUI4	Rhinocladiella mackenziei CBS 650.93
2	497	Uncharacterized protein	KE384722	H634G_01904	A0A0D9P927	GI:770396796|EMBL-CDS:KJK82767.1	#0000FF	Metarhizium anisopliae BRIP 53293.	A0A0D9P927	450	A0A0D9P927	Metarhizium anisopliae BRIP 53293
2	497	Glycoside hydrolase	LSBH01000006	VFPBJ_07792	A0A179GIQ0	GI:1032870586|EMBL-CDS:OAQ77320.1	#0000FF	Purpureocillium lilacinum.	A0A179GIQ0	387	A0A179GIQ0	Purpureocillium lilacinum
2	497	Endoglucanase	ADNJ02000009	MAA_01543	E9ELN5	GI:629708631|GI:322712896|EMBL-CDS:EFZ04469.1|REFSEQ:XP_007817732.1	#0000FF	Metarhizium robertsii (strain ARSEF 23 / ATCC MYA-3075)	E9ELN5	472	E9ELN5	Metarhizium robertsii ARSEF 23
2	497	Uncharacterized protein	KN847523	PV10_06704	A0A0D1ZC09	GI:1022637226|GI:759214907|EMBL-CDS:KIV92247.1|REFSEQ:XP_016223821.1	#0000FF	Exophiala mesophila.	A0A0D1ZC09	450	A0A0D1ZC09	Exophiala mesophila
2	497	Uncharacterized protein	CVQI01000001	BN1708_006566	A0A0G4KF46	EMBL-CDS:CRJ86945.1|EMBL-CDS:CRK34931.1	#0000FF	Verticillium longisporum.	A0A0G4KF46	421	A0A0G4KF46	Verticillium longisporum
2	497	Uncharacterized protein	JPJS01001930	V490_06552	A0A093XU62	GI:682263705|EMBL-CDS:KFX90254.1	#0000FF	Pseudogymnoascus sp. VKM F-3557.	A0A093XU62	410	A0A093XU62	Pseudogymnoascus sp. VKM F-3557
2	497	Uncharacterized protein	MDYO01000039	PENSOL_c039G06178	A0A1V6QTS1	GI:1168091989|EMBL-CDS:OQD92630.1	#0000FF	Penicillium solitum.	A0A1V6QTS1	411	A0A1V6QTS1	Penicillium solitum
2	497	Uncharacterized protein	MSFO01000002	P170DRAFT_422879	A0A2I2GGD4	EMBL-CDS:PLB51949.1	#0000FF	Aspergillus steynii IBT 23096.	A0A2I2GGD4	385	A0A2I2GGD4	Aspergillus steynii IBT 23096
2	497	Uncharacterized protein	NRSZ01000737	TCAP_04565	A0A2K3QD90	EMBL-CDS:PNY25493.1	#0000FF	Tolypocladium capitatum.	A0A2K3QD90	401	A0A2K3QD90	Tolypocladium capitatum
2	497	Endoglucanase	AZNE01000023	MAJ_05459	A0A0B4I6J6	GI:743671597|GI:953468101|EMBL-CDS:KID98531.1|REFSEQ:XP_014577525.1	#0000FF	Metarhizium majus ARSEF 297.	A0A0B4I6J6	450	A0A0B4I6J6	Metarhizium majus ARSEF 297
2	497	Unplaced genomic scaffold supercont1.13| whole genome shotgun sequence	KN846992	Z519_08478	A0A0D2HIW6	GI:759314341|GI:1027038066|EMBL-CDS:KIW90695.1|REFSEQ:XP_016617364.1	#0000FF	Cladophialophora bantiana CBS 173.52.	A0A0D2HIW6	422	A0A0D2HIW6	Cladophialophora bantiana CBS 173.52
2	497	Str. FM013	HG793188	PCAMFM013_S055g000015	A0A0G4PWN5	GI:902265931|EMBL-CDS:CRL30600.1	#0000FF	Penicillium camemberti FM 013.	A0A0G4PWN5	410	A0A0G4PWN5	Penicillium camemberti FM 013
2	497	Lytic polysaccharide monooxygenase	KV407463	L228DRAFT_23353	A0A165AA08	GI:1018268050|GI:1069627109|EMBL-CDS:KZF20152.1|REFSEQ:XP_018185707.1	#0000FF	Xylona heveae TC161.	A0A165AA08	389	A0A165AA08	Xylona heveae TC161
2	497	Glycoside hydrolase	LSBI01000007	VFPFJ_08059	A0A179H7V3	GI:1032878957|GI:1069609824|EMBL-CDS:OAQ85670.1|REFSEQ:XP_018176527.1	#0000FF	Purpureocillium lilacinum.	A0A179H7V3	393	A0A179H7V3	Purpureocillium lilacinum
2	497	Uncharacterized protein	MDYM01000001	PENPOL_c001G04629	A0A1V6P2U0	GI:1168069284|EMBL-CDS:OQD71308.1	#0000FF	Penicillium polonicum.	A0A1V6P2U0	409	A0A1V6P2U0	Penicillium polonicum
2	497	Uncharacterized protein	JPDN02000022	TGAM01_v206448	A0A2P4ZJR1	GI:1087761111|EMBL-CDS:PON24518.1|REFSEQ:XP_018665098.1	#0000FF	Trichoderma gamsii.	A0A2P4ZJR1	403	A0A2P4ZJR1	Trichoderma gamsii
2	497	Uncharacterized protein	JPJT01004061	V491_06515	A0A093Z7I0	GI:682301159|EMBL-CDS:KFY13099.1	#0000FF	Pseudogymnoascus sp. VKM F-3775.	A0A093Z7I0	274	A0A093Z7I0	Pseudogymnoascus sp. VKM F-3775
2	497	Uncharacterized protein	EQ962655	TSTA_116490	B8MBJ5	GI:242791913|GI:218718439|EMBL-CDS:EED17859.1|REFSEQ:XP_002481851.1	#0000FF	Talaromyces stipitatus (strain ATCC 10500 / CBS 375.48 / QM 6759 /NRRL 1006)	B8MBJ5	412	B8MBJ5	Talaromyces stipitatus ATCC 10500
2	497	Endoglucanase	ADNJ02000004	MAA_03139	E9ER97	GI:629713647|GI:322710335|EMBL-CDS:EFZ01910.1|REFSEQ:XP_007819328.1	#0000FF	Metarhizium robertsii (strain ARSEF 23 / ATCC MYA-3075)	E9ER97	439	E9ER97	Metarhizium robertsii ARSEF 23
2	497	Uncharacterized protein	JH921444	MBM_06927	K1WP51	GI:597583519|GI:406861663|EMBL-CDS:EKD14716.1|REFSEQ:XP_007294816.1	#0000FF	Marssonina brunnea f. sp. multigermtubi (strain MB_m1)	K1WP51	456	K1WP51	Marssonina brunnea f. sp. 'multigermtubi' MB_m1
2	497	Uncharacterized protein	JELW01000005	X797_004537	A0A0A1UWK2	GI:594719517|EMBL-CDS:EXV02407.1	#0000FF	Metarhizium robertsii.	A0A0A1UWK2	425	A0A0A1UWK2	Metarhizium robertsii
2	497	Endoglucanase	AZNH01000019	MGU_05960	A0A0B4HAI2	GI:743659559|EMBL-CDS:KID86831.1	#0000FF	Metarhizium guizhouense ARSEF 977.	A0A0B4HAI2	472	A0A0B4HAI2	Metarhizium guizhouense ARSEF 977
2	497	Uncharacterized protein	LHQQ01000283	ACN38_g11258	A0A0M9WAW1	GI:924881648|EMBL-CDS:KOS37935.1	#0000FF	Penicillium nordicum.	A0A0M9WAW1	457	A0A0M9WAW1	Penicillium nordicum
2	497	Uncharacterized protein	MLQL01000009	PENFLA_c009G05692	A0A1V6TH02	GI:1168125541|EMBL-CDS:OQE24883.1	#0000FF	Penicillium flavigenum.	A0A1V6TH02	400	A0A1V6TH02	Penicillium flavigenum
2	497	Uncharacterized protein	KN847320	PV05_07152	A0A0D2EHB7	GI:759278313|GI:915175652|EMBL-CDS:KIW54818.1|REFSEQ:XP_013315402.1	#0000FF	Exophiala xenobiotica.	A0A0D2EHB7	425	A0A0D2EHB7	Exophiala xenobiotica
2	497	Putative dna-directed rna polymerase	LCWF01000065	UCRPC4_g02795	A0A0G2GJM0	GI:821068579|EMBL-CDS:KKY23698.1	#0000FF	Phaeomoniella chlamydospora.	A0A0G2GJM0	405	A0A0G2GJM0	Phaeomoniella chlamydospora
2	497	Uncharacterized protein	LHQR01000048	PGRI_056160	A0A135LL45	GI:995936969|EMBL-CDS:KXG49648.1	#0000FF	Penicillium patulum	A0A135LL45	395	A0A135LL45	Penicillium griseofulvum
2	497	Uncharacterized protein	GL891302	NEUTE1DRAFT_127516	F8MDW4	GI:698981894|GI:336472541|EMBL-CDS:EGO60701.1|REFSEQ:XP_009847928.1	#0000FF	Neurospora tetrasperma (strain FGSC 2508 / ATCC MYA-4615 / P0657)	F8MDW4	397	F8MDW4	Neurospora tetrasperma FGSC 2508
2	497	Uncharacterized protein	JPKB01001320	V499_08537	A0A094EHW1	GI:682391482|EMBL-CDS:KFY71245.1	#0000FF	Pseudogymnoascus sp. VKM F-103.	A0A094EHW1	408	A0A094EHW1	Pseudogymnoascus sp. VKM F-103
2	497	Uncharacterized protein	FWEW01003866	None	A0A1W5DE71	EMBL-CDS:SLM41467.1	#0000FF	Umbilicaria pustulata.	A0A1W5DE71	430	A0A1W5DE71	Umbilicaria pustulata
2	497	Uncharacterized protein	NJES01000291	CDD80_3275	A0A2C5Z4P6	EMBL-CDS:PHH74161.1	#0000FF	Ophiocordyceps camponoti-rufipedis.	A0A2C5Z4P6	212	A0A2C5Z4P6	Ophiocordyceps camponoti-rufipedis
2	497	Related to spore coat protein SP96	FJUY01000012	RCC_07584	A0A2D3VI96	EMBL-CDS:CZT21719.1	#0000FF	Ramularia collo-cygni.	A0A2D3VI96	419	A0A2D3VI96	Ramularia collo-cygni
2	497	Uncharacterized protein	GL698479	MAC_02077	E9DWS9	GI:629686243|GI:322700035|EMBL-CDS:EFY91792.1|REFSEQ:XP_007808417.1	#0000FF	Metarhizium acridum (strain CQMa 102)	E9DWS9	469	E9DWS9	Metarhizium acridum CQMa 102
2	497	Uncharacterized protein	AKCU01000339	PDIP_49380	K9FUF2	GI:425774959|GI:953379327|EMBL-CDS:EKV13250.1|REFSEQ:XP_014533932.1	#0000FF	Penicillium digitatum (strain Pd1 / CECT 20795)	K9FUF2	394	K9FUF2	Penicillium digitatum Pd1
2	497	Uncharacterized protein	AKCT01000216	PDIG_54160	K9G812	GI:425772527|EMBL-CDS:EKV10928.1	#0000FF	Penicillium digitatum (strain PHI26 / CECT 20796)	K9G812	394	K9G812	Penicillium digitatum PHI26
2	497	Uncharacterized protein	KN847340	PV06_09150	A0A0D2DV02	GI:1022896071|GI:759262847|EMBL-CDS:KIW39374.1|REFSEQ:XP_016259590.1	#0000FF	Exophiala oligosperma.	A0A0D2DV02	432	A0A0D2DV02	Exophiala oligosperma
2	497	Uncharacterized protein	LLXE01000078	ACN42_g3857	A0A101MMG6	GI:973789944|EMBL-CDS:KUM63255.1	#0000FF	Penicillium freii.	A0A101MMG6	409	A0A101MMG6	Penicillium freii
2	497	Uncharacterized protein	MDDG01000013	PENCOP_c013G05456	A0A1V6UAA2	GI:1168136421|EMBL-CDS:OQE35421.1	#0000FF	Penicillium coprophilum.	A0A1V6UAA2	415	A0A1V6UAA2	Penicillium coprophilum
2	497	Uncharacterized protein	KB726554	FOC4_g10012714	N1RSG3	GI:475670948|EMBL-CDS:EMT68301.1	#0000FF	Fusarium oxysporum f. sp. cubense (strain race 4)	N1RSG3	268	N1RSG3	Fusarium oxysporum f. sp. cubense race 4
2	497	Uncharacterized protein	JPKA01000355	V498_02229	A0A094G257	GI:682431247|EMBL-CDS:KFY97126.1	#0000FF	Pseudogymnoascus sp. VKM F-4517	A0A094G257	409	A0A094G257	Pseudogymnoascus sp. VKM F-4517 (FW-2822)
2	497	Uncharacterized protein	KE384744	H634G_08277	A0A0D9NR53	GI:770390393|EMBL-CDS:KJK76386.1	#0000FF	Metarhizium anisopliae BRIP 53293.	A0A0D9NR53	438	A0A0D9NR53	Metarhizium anisopliae BRIP 53293
2	497	Chitin-binding| domain 3	AZHC01000006	NOR_02789	A0A162JTI8	GI:1025659685|EMBL-CDS:OAA47153.1	#0000FF	Metarhizium rileyi RCEF 4871.	A0A162JTI8	420	A0A162JTI8	Metarhizium rileyi RCEF 4871
2	497	Uncharacterized protein	CM002799	EN45_078360	A0A167UG69	GI:1021541937|EMBL-CDS:KZN89241.1	#0000FF	Penicillium chrysogenum	A0A167UG69	400	A0A167UG69	Penicillium chrysogenum
2	497	Uncharacterized protein	MOOB01000037	PENNAL_c0037G09672	A0A1V6Y4E9	GI:1168184783|EMBL-CDS:OQE82262.1	#0000FF	Penicillium nalgiovense.	A0A1V6Y4E9	411	A0A1V6Y4E9	Penicillium nalgiovense
2	497	Uncharacterized protein	LT882683	ZT1A5_G8425	A0A1Y6LWC4	EMBL-CDS:SMY26981.1	#0000FF	Zymoseptoria tritici ST99CH_1A5.	A0A1Y6LWC4	442	A0A1Y6LWC4	Zymoseptoria tritici ST99CH_1A5
2	497	Uncharacterized protein	LT854280	ZT3D1_G8423	A0A2H1H1X2	EMBL-CDS:SMR59792.1	#0000FF	Zymoseptoria tritici ST99CH_3D1.	A0A2H1H1X2	442	A0A2H1H1X2	Zymoseptoria tritici ST99CH_3D1
2	497	Pc21g16530 protein	AM920436	Pc21g16530	B6HLC9	GI:255955815|GI:211590371|EMBL-CDS:CAP96550.1|REFSEQ:XP_002568660.1	#0000FF	Penicillium rubens (strain ATCC 28089 / DSM 1075 / NRRL 1951 /Wisconsin 54-1255)	B6HLC9	400	B6HLC9	Penicillium rubens Wisconsin 54-1255
2	497	Glycoside hydrolase	KE652179	OCS_00187	T5ANG6	GI:531867352|EMBL-CDS:EQL04114.1	#0000FF	Ophiocordyceps sinensis (strain Co18 / CGMCC 3.14243)	T5ANG6	294	T5ANG6	Ophiocordyceps sinensis CO18
2	497	Endoglucanase	AZNG01000004	MBR_04095	A0A0B4FPH8	GI:743645002|GI:953403208|EMBL-CDS:KID76160.1|REFSEQ:XP_014545332.1	#0000FF	Metarhizium brunneum ARSEF 3297.	A0A0B4FPH8	433	A0A0B4FPH8	Metarhizium brunneum ARSEF 3297
2	497	Uncharacterized protein	CDHK01000008	PMG11_09011	A0A0F7TUS3	EMBL-CDS:CEJ60438.1	#0000FF	Penicillium brasilianum.	A0A0F7TUS3	403	A0A0F7TUS3	Penicillium brasilianum
2	497	Uncharacterized protein	KV454585	VE00_02736	A0A1B8CHT7	GI:1040504590|EMBL-CDS:OBT46371.1	#0000FF	Pseudogymnoascus sp. WSF 3629.	A0A1B8CHT7	408	A0A1B8CHT7	Pseudogymnoascus sp. WSF 3629
2	497	Uncharacterized protein	CM001233	MGG_09527	G4N1D5	GI:351644545|GI:389629120|EMBL-CDS:EHA52406.1|REFSEQ:XP_003712213.1	#0000FF	Magnaporthe oryzae (strain 70-15 / ATCC MYA-4617 / FGSC 8958)	G4N1D5	392	G4N1D5	Magnaporthe oryzae 70-15
2	497	Uncharacterized protein	JH793500	OOU_Y34scaffold00548g32	L7I5I2	GI:440469093|EMBL-CDS:ELQ38216.1	#0000FF	Magnaporthe oryzae (strain Y34)	L7I5I2	392	L7I5I2	Magnaporthe oryzae Y34
2	497	Uncharacterized protein	JH795719	OOW_P131scaffold00450g11	L7JCF2	GI:440485971|EMBL-CDS:ELQ65882.1	#0000FF	Magnaporthe oryzae (strain P131)	L7JCF2	392	L7JCF2	Magnaporthe oryzae P131
2	497	Genomic scaffold| ProqFM164S01	HG792015	PROQFM164_S01g003405	W6PZ98	GI:584417878|EMBL-CDS:CDM29593.1	#0000FF	Penicillium roqueforti (strain FM164)	W6PZ98	400	W6PZ98	Penicillium roqueforti FM164
2	497	Glycoside hydrolase	AZNF01000001	MAN_00936	A0A0B4FUE5	GI:743639970|EMBL-CDS:KID71337.1	#0000FF	Metarhizium anisopliae ARSEF 549.	A0A0B4FUE5	438	A0A0B4FUE5	Metarhizium anisopliae ARSEF 549
2	497	Putative dna-directed rna polymerase	LAQI01000055	UCDDS831_g02208	A0A0G2GN91	GI:821069787|EMBL-CDS:KKY24868.1	#0000FF	Diplodia seriata.	A0A0G2GN91	401	A0A0G2GN91	Diplodia seriata
2	497	Uncharacterized protein	DS027004	ACLA_002140	A1C535	GI:119404427|GI:121718901|EMBL-CDS:EAW14803.1|REFSEQ:XP_001276229.1	#0000FF	Aspergillus clavatus (strain ATCC 1007 / CBS 513.65 / DSM 816 /NCTC 3887 / NRRL 1)	A1C535	441	A1C535	Aspergillus clavatus NRRL 1
2	497	Uncharacterized protein	KN847492	PV08_01728	A0A0D2BQC0	GI:759244208|GI:1022793174|EMBL-CDS:KIW21148.1|REFSEQ:XP_016241364.1	#0000FF	Exophiala spinifera.	A0A0D2BQC0	419	A0A0D2BQC0	Exophiala spinifera
2	497	Uncharacterized protein	KN848089	Z520_10223	A0A0D2IAL3	GI:1027045281|GI:761332557|EMBL-CDS:KIX94196.1|REFSEQ:XP_016628319.1	#0000FF	Fonsecaea multimorphosa CBS 102226.	A0A0D2IAL3	397	A0A0D2IAL3	Fonsecaea multimorphosa CBS 102226
2	497	Uncharacterized protein	JPJU01000648	V492_02235	A0A094BXI9	GI:682304526|EMBL-CDS:KFY15097.1	#0000FF	Pseudogymnoascus sp. VKM F-4246.	A0A094BXI9	413	A0A094BXI9	Pseudogymnoascus sp. VKM F-4246
2	497	Uncharacterized protein	LVCI01000113	AYO22_09709	A0A178BQC4	GI:1029142294|EMBL-CDS:OAL19547.1	#0000FF	Fonsecaea multimorphosa.	A0A178BQC4	397	A0A178BQC4	Fonsecaea multimorphosa
2	497	Uncharacterized protein	KV878214	ASPWEDRAFT_42993	A0A1L9RDF2	GI:1111850109|EMBL-CDS:OJJ32960.1	#0000FF	Aspergillus wentii DTO 134E9.	A0A1L9RDF2	425	A0A1L9RDF2	Aspergillus wentii DTO 134E9
2	497	Uncharacterized protein	MDYP01000040	PENVUL_c040G01681	A0A1V6RJZ7	GI:1168101806|EMBL-CDS:OQE02161.1	#0000FF	Penicillium vulpinum.	A0A1V6RJZ7	413	A0A1V6RJZ7	Penicillium vulpinum
2	497	Uncharacterized protein	LVYI01000003	AYL99_03730	A0A178ZP15	GI:1089688964|GI:1032438777|EMBL-CDS:OAP61527.1|REFSEQ:XP_018694894.1	#0000FF	Fonsecaea erecta.	A0A178ZP15	409	A0A178ZP15	Fonsecaea erecta
2	497	Uncharacterized protein	PDNB01000296	AJ79_09740	A0A2B7W966	EMBL-CDS:PGG96083.1	#0000FF	Helicocarpus griseus UAMH5409.	A0A2B7W966	416	A0A2B7W966	Helicocarpus griseus UAMH5409
2	497	Uncharacterized protein	KB733447	COCC4DRAFT_110653	N4X9Q0	GI:928527044|GI:477591338|EMBL-CDS:ENI08410.1|REFSEQ:XP_014082319.1	#0000FF	Cochliobolus heterostrophus (strain C4 / ATCC 48331 / race T)	N4X9Q0	398	N4X9Q0	Bipolaris maydis ATCC 48331
2	497	Uncharacterized protein	AMGX01000001	A1O5_01211	W9X8X8	GI:628303163|GI:589994173|EMBL-CDS:EXJ76703.1|REFSEQ:XP_007740020.1	#0000FF	Cladophialophora psammophila CBS 110553.	W9X8X8	422	W9X8X8	Cladophialophora psammophila CBS 110553
2	497	Uncharacterized protein	LJBN01000167	PEBR_25596	A0A1S9RJE7	GI:1151452012|EMBL-CDS:OOQ85649.1	#0000FF	Penicillium brasilianum.	A0A1S9RJE7	400	A0A1S9RJE7	Penicillium brasilianum
2	497	Uncharacterized protein	PDND01000017	GX50_01429	A0A2B7ZNZ1	EMBL-CDS:PGH35716.1	#0000FF	Emmonsia crescens.	A0A2B7ZNZ1	440	A0A2B7ZNZ1	Emmonsia crescens
2	497	Uncharacterized protein	MSFM01000007	P168DRAFT_297706	A0A2I1D1T4	EMBL-CDS:PKY03842.1	#0000FF	Aspergillus campestris IBT 28561.	A0A2I1D1T4	395	A0A2I1D1T4	Aspergillus campestris IBT 28561
2	497	Uncharacterized protein	JPKC01001209	V500_03854	A0A094FR03	GI:682425574|EMBL-CDS:KFY93191.1	#0000FF	Pseudogymnoascus sp. VKM F-4518	A0A094FR03	414	A0A094FR03	Pseudogymnoascus sp. VKM F-4518 (FW-2643)
2	497	Uncharacterized protein	DS995901	PMAA_081780	B6QFD4	GI:210070079|GI:212535048|EMBL-CDS:EEA24169.1|REFSEQ:XP_002147680.1	#0000FF	Talaromyces marneffei (strain ATCC 18224 / CBS 334.59 / QM 7333)	B6QFD4	399	B6QFD4	Talaromyces marneffei ATCC 18224
2	497	Uncharacterized protein	KB445576	COCHEDRAFT_1214230	M2UDU6	GI:451999368|EMBL-CDS:EMD91831.1	#0000FF	Cochliobolus heterostrophus (strain C5 / ATCC 48332 / race O)	M2UDU6	394	M2UDU6	Bipolaris maydis C5
2	497	Uncharacterized protein	AMWN01000002	A1O1_02211	W9YMN7	GI:590018619|GI:628226562|EMBL-CDS:EXJ93818.1|REFSEQ:XP_007721312.1	#0000FF	Capronia coronata CBS 617.96.	W9YMN7	417	W9YMN7	Capronia coronata CBS 617.96
2	497	Uncharacterized protein	DS268110	CPAG_03870	A0A0J6F3Q1	GI:855532389|EMBL-CDS:KMM67536.1	#0000FF	Coccidioides posadasii RMSCC 3488.	A0A0J6F3Q1	408	A0A0J6F3Q1	Coccidioides posadasii RMSCC 3488
2	497	Uncharacterized protein	KV878987	ASPACDRAFT_35448	A0A1L9WIR8	GI:1147211964|GI:1111939862|EMBL-CDS:OJJ96053.1|REFSEQ:XP_020052393.1	#0000FF	Aspergillus aculeatus ATCC 16872.	A0A1L9WIR8	399	A0A1L9WIR8	Aspergillus aculeatus ATCC 16872
2	497	Uncharacterized protein	ACFW01000025	CPC735_029830	C5P4K7	GI:240109478|GI:303319585|EMBL-CDS:EER27647.1|REFSEQ:XP_003069792.1	#0000FF	Coccidioides posadasii (strain C735)	C5P4K7	408	C5P4K7	Coccidioides posadasii C735 delta SOWgp
2	497	Uncharacterized protein	GL636486	CPSG_00565	E9CSK6	GI:320040733|EMBL-CDS:EFW22666.1	#0000FF	Coccidioides posadasii (strain RMSCC 757 / Silveira)	E9CSK6	408	E9CSK6	Coccidioides posadasii str. Silveira
2	497	DNA-directed RNA polymerase	JH226132	HMPREF1120_03169	H6BV97	GI:378728552|GI:684163193|EMBL-CDS:EHY55011.1|REFSEQ:XP_009155472.1	#0000FF	Exophiala dermatitidis (strain ATCC 34100 / CBS 525.76 / NIH/UT8656)	H6BV97	405	H6BV97	Exophiala dermatitidis NIH/UT8656
2	497	Uncharacterized protein	KB456265	SEPMUDRAFT_142137	N1QHJ5	GI:453083884|GI:1030136885|EMBL-CDS:EMF11929.1|REFSEQ:XP_016760050.1	#0000FF	Sphaerulina musiva (strain SO2202)	N1QHJ5	440	N1QHJ5	Sphaerulina musiva SO2202
2	497	Uncharacterized protein	NPHW01003863	Egran_03411	A0A232LXD4	GI:1227551586|EMBL-CDS:OXV08829.1	#0000FF	Elaphomyces granulatus.	A0A232LXD4	432	A0A232LXD4	Elaphomyces granulatus
2	497	Uncharacterized protein	KV458811	VF21_04748	A0A1B8F037	GI:1040540439|EMBL-CDS:OBT76918.1	#0000FF	Pseudogymnoascus sp. 05NY08.	A0A1B8F037	410	A0A1B8F037	Pseudogymnoascus sp. 05NY08
2	497	Uncharacterized protein	KL660812	S40285_01712	A0A084QDV7	GI:667719806|EMBL-CDS:KFA62142.1	#0000FF	Stachybotrys chlorohalonata (strain IBT 40285)	A0A084QDV7	407	A0A084QDV7	Stachybotrys chlorohalonata IBT 40285
2	497	Uncharacterized protein	GG704912	CIMG_06502	A0A0E1S1Y6	GI:119183059|GI:90301392|EMBL-CDS:EAS31023.1|REFSEQ:XP_001242606.1	#0000FF	Coccidioides immitis (strain RS)	A0A0E1S1Y6	408	A0A0E1S1Y6	Coccidioides immitis RS
2	497	Uncharacterized protein	DS028094	CIRG_03314	A0A0J7B1F1	GI:859409073|EMBL-CDS:KMP03622.1	#0000FF	Coccidioides immitis RMSCC 2394.	A0A0J7B1F1	408	A0A0J7B1F1	Coccidioides immitis RMSCC 2394
2	497	Uncharacterized protein	DS268129	CISG_03471	A0A0J8QLD6	GI:875279373|EMBL-CDS:KMU73211.1	#0000FF	Coccidioides immitis RMSCC 3703.	A0A0J8QLD6	408	A0A0J8QLD6	Coccidioides immitis RMSCC 3703
2	497	Uncharacterized protein	LGLR01000178	TW65_01258	A0A0L1HY24	GI:909993812|EMBL-CDS:KNG51246.1	#0000FF	Stemphylium lycopersici.	A0A0L1HY24	374	A0A0L1HY24	Stemphylium lycopersici
2	497	Uncharacterized protein	KV441548	CC84DRAFT_1079899	A0A177D1P0	GI:1027152503|GI:1066273655|EMBL-CDS:OAG12949.1|REFSEQ:XP_018043314.1	#0000FF	Paraphaeosphaeria sporulosa.	A0A177D1P0	365	A0A177D1P0	Paraphaeosphaeria sporulosa
2	497	Uncharacterized protein	MNBE01000653	PENSUB_8018	A0A1Q5THV6	GI:1120653814|EMBL-CDS:OKO99801.1	#0000FF	Penicillium subrubescens.	A0A1Q5THV6	394	A0A1Q5THV6	Penicillium subrubescens
2	497	Uncharacterized protein	MDYL01000019	PENDEC_c019G06767	A0A1V6P7K1	GI:1168070731|EMBL-CDS:OQD72712.1	#0000FF	Penicillium decumbens.	A0A1V6P7K1	394	A0A1V6P7K1	Penicillium decumbens
2	497	Uncharacterized protein	NPFK01000025	PENO1_016000	A0A2H3IXW0	EMBL-CDS:PCH06709.1	#0000FF	Penicillium occitanis.	A0A2H3IXW0	419	A0A2H3IXW0	Penicillium occitanis
2	497	Uncharacterized protein	KZ112934	K445DRAFT_316452	A0A1Y2X661	GI:1190928205|EMBL-CDS:OTB16927.1	#0000FF	Daldinia sp. EC12.	A0A1Y2X661	352	A0A1Y2X661	Daldinia sp. EC12
2	497	Uncharacterized protein	KB446540	DOTSEDRAFT_72390	M2WLP0	GI:452841006|EMBL-CDS:EME42943.1	#0000FF	Dothistroma septosporum (strain NZE10 / CBS 128990)	M2WLP0	445	M2WLP0	Dothistroma septosporum NZE10
2	497	Lytic polysaccharide monooxygenase	KI964693	COCCADRAFT_44748	W6XZA4	GI:628222484|GI:576916384|EMBL-CDS:EUC30645.1|REFSEQ:XP_007715073.1	#0000FF	Bipolaris zeicola 26-R-13.	W6XZA4	381	W6XZA4	Bipolaris zeicola 26-R-13
2	497	Uncharacterized protein	AMGV01000001	A1O9_01676	A0A072PWF8	GI:915110060|GI:656918120|EMBL-CDS:KEF63698.1|REFSEQ:XP_013266288.1	#0000FF	Exophiala aquamarina CBS 119918.	A0A072PWF8	454	A0A072PWF8	Exophiala aquamarina CBS 119918
2	497	Lytic polysaccharide monooxygenase	KV878989	ASPACDRAFT_16626	A0A1L9WGX0	GI:1111939218|GI:1147213149|EMBL-CDS:OJJ95434.1|REFSEQ:XP_020051774.1	#0000FF	Aspergillus aculeatus ATCC 16872.	A0A1L9WGX0	436	A0A1L9WGX0	Aspergillus aculeatus ATCC 16872
2	497	Uncharacterized protein	MLKD01000015	PENSTE_c015G09882	A0A1V6T0T4	GI:1168120110|EMBL-CDS:OQE19579.1	#0000FF	Penicillium steckii.	A0A1V6T0T4	399	A0A1V6T0T4	Penicillium steckii
2	497	Uncharacterized protein	LT853699	ZT3D7_G8504	A0A1X7S1P3	EMBL-CDS:SMQ53351.1	#0000FF	Zymoseptoria tritici ST99CH_3D7.	A0A1X7S1P3	427	A0A1X7S1P3	Zymoseptoria tritici ST99CH_3D7
2	497	Uncharacterized protein	CM001203	MYCGRDRAFT_46866	F9XHM6	GI:339469908|GI:398393142|EMBL-CDS:EGP85006.1|REFSEQ:XP_003850030.1	#0000FF	Zymoseptoria tritici (strain CBS 115943 / IPO323)	F9XHM6	427	F9XHM6	Zymoseptoria tritici IPO323
2	497	Lytic polysaccharide monooxygenase	KI964001	COCMIDRAFT_48854	W6YYY5	GI:627837661|GI:576931013|EMBL-CDS:EUC44582.1|REFSEQ:XP_007688893.1	#0000FF	Bipolaris oryzae ATCC 44560.	W6YYY5	382	W6YYY5	Bipolaris oryzae ATCC 44560
2	497	Lytic polysaccharide monooxygenase	KI968822	COCVIDRAFT_51512	W7E0Z5	GI:578484581|GI:953419207|EMBL-CDS:EUN22101.1|REFSEQ:XP_014551675.1	#0000FF	Bipolaris victoriae FI3.	W7E0Z5	381	W7E0Z5	Bipolaris victoriae FI3
2	497	Uncharacterized protein	KL656885	S40288_07557	A0A084RZJ7	GI:667743223|EMBL-CDS:KFA81632.1	#0000FF	Stachybotrys chartarum IBT 40288.	A0A084RZJ7	398	A0A084RZJ7	Stachybotrys chartarum IBT 40288
2	497	Uncharacterized protein	GL629771	CMQ_5911	F0XIK3	GI:930143252|GI:320590105|EMBL-CDS:EFX02550.1|REFSEQ:XP_014172032.1	#0000FF	Grosmannia clavigera (strain kw1407 / UAMH 11150)	F0XIK3	441	F0XIK3	Grosmannia clavigera kw1407
2	497	Uncharacterized protein	DS016982	CIHG_00898	A0A0J8REW1	GI:875635494|EMBL-CDS:KMU83116.1	#0000FF	Coccidioides immitis H538.4.	A0A0J8REW1	400	A0A0J8REW1	Coccidioides immitis H538.4
2	497	Uncharacterized protein	LFJN01000031	AB675_2992	A0A0N1NW87	GI:930437800|GI:1063883440|EMBL-CDS:KPI36380.1|REFSEQ:XP_017996343.1	#0000FF	Phialophora attae.	A0A0N1NW87	230	A0A0N1NW87	Phialophora attae
2	497	Chitin-binding| domain 3	AZGZ01000015	AAP_03629	A0A167Y8L2	GI:1024751953|EMBL-CDS:KZZ90988.1	#0000FF	Ascosphaera apis ARSEF 7405.	A0A167Y8L2	416	A0A167Y8L2	Ascosphaera apis ARSEF 7405
2	497	Uncharacterized protein	LVKK01000014	AYO21_03020	A0A177FEZ8	GI:1027222038|EMBL-CDS:OAG42737.1	#0000FF	Fonsecaea monophora.	A0A177FEZ8	420	A0A177FEZ8	Fonsecaea monophora
2	497	Uncharacterized protein	KV878217	ASPWEDRAFT_699551	A0A1L9R567	GI:1111847180|EMBL-CDS:OJJ30059.1	#0000FF	Aspergillus wentii DTO 134E9.	A0A1L9R567	263	A0A1L9R567	Aspergillus wentii DTO 134E9
2	497	Uncharacterized protein	NKHU01000114	CDV56_06008	A0A231MEA9	GI:1226035923|EMBL-CDS:OXS07956.1	#0000FF	Aspergillus thermomutatus.	A0A231MEA9	418	A0A231MEA9	Aspergillus thermomutatus
2	497	Uncharacterized protein	KZ559118	BDW47DRAFT_26809	A0A2I2FNW6	EMBL-CDS:PLB42308.1	#0000FF	Aspergillus candidus.	A0A2I2FNW6	401	A0A2I2FNW6	Aspergillus candidus
2	497	Uncharacterized protein	KL647853	S7711_01485	A0A084B743	GI:666408392|EMBL-CDS:KEY73372.1	#0000FF	Stachybotrys chartarum (strain CBS 109288 / IBT 7711)	A0A084B743	398	A0A084B743	Stachybotrys chartarum IBT 7711
2	497	Unplaced genomic scaffold supercont1.4| whole genome shotgun sequence	KN846972	Z517_06414	A0A0D2H538	GI:759303393|GI:915085719|EMBL-CDS:KIW79799.1|REFSEQ:XP_013283607.1	#0000FF	Fonsecaea pedrosoi CBS 271.37.	A0A0D2H538	425	A0A0D2H538	Fonsecaea pedrosoi CBS 271.37
2	497	Uncharacterized protein	KV441469	CC77DRAFT_923659	A0A177E3E3	GI:1027165563|GI:1070540010|EMBL-CDS:OAG25930.1|REFSEQ:XP_018391351.1	#0000FF	Alternaria alternata	A0A177E3E3	329	A0A177E3E3	Alternaria alternata
2	497	Uncharacterized protein	JPKE01002916	V502_08486	A0A094HNE0	GI:682450077|EMBL-CDS:KFZ09786.1	#0000FF	Pseudogymnoascus sp. VKM F-4520	A0A094HNE0	407	A0A094HNE0	Pseudogymnoascus sp. VKM F-4520 (FW-2644)
2	497	Uncharacterized protein	LVCJ01000098	AYO20_09890	A0A178CBF2	GI:1029149743|EMBL-CDS:OAL26857.1	#0000FF	Fonsecaea nubica.	A0A178CBF2	420	A0A178CBF2	Fonsecaea nubica
2	497	Uncharacterized protein	LXJU01000002	PENARI_c002G07844	A0A1F5LUU4	GI:1083162499|EMBL-CDS:OGE56948.1	#0000FF	Penicillium arizonense.	A0A1F5LUU4	414	A0A1F5LUU4	Penicillium arizonense
2	497	Uncharacterized protein	AHHD01000169	MPH_03818	K2S955	GI:407925961|EMBL-CDS:EKG18934.1	#0000FF	Macrophomina phaseolina (strain MS6)	K2S955	384	K2S955	Macrophomina phaseolina MS6
2	497	Uncharacterized protein	KB446559	MYCFIDRAFT_59548	M3AYZ8	GI:452982673|GI:631385418|EMBL-CDS:EME82432.1|REFSEQ:XP_007927089.1	#0000FF	Pseudocercospora fijiensis (strain CIRAD86)	M3AYZ8	441	M3AYZ8	Pseudocercospora fijiensis CIRAD86
2	497	Chitin binding domain family protein	NKJJ01000011	CAN33_18050	A0A254U178	GI:1213323751|EMBL-CDS:OWW32974.1	#0000FF	Aspergillus niger.	A0A254U178	335	A0A254U178	Aspergillus niger
2	497	Uncharacterized protein	KB445648	COCSADRAFT_60631	M2SWD0	GI:451847995|GI:628081628|EMBL-CDS:EMD61301.1|REFSEQ:XP_007702664.1	#0000FF	Cochliobolus sativus (strain ND90Pr / ATCC 201652)	M2SWD0	389	M2SWD0	Bipolaris sorokiniana ND90Pr
2	497	Uncharacterized protein	LCZI01000892	EMCG_00241	A0A0G2I034	GI:821507223|EMBL-CDS:KKZ63932.1	#0000FF	Emmonsia crescens UAMH 3008.	A0A0G2I034	341	A0A0G2I034	Emmonsia crescens UAMH 3008
2	497	Uncharacterized protein	BCLY01000012	ALT_6221	A0A0S7DTW4	EMBL-CDS:GAQ08900.1	#0000FF	Aspergillus lentulus.	A0A0S7DTW4	418	A0A0S7DTW4	Aspergillus lentulus
2	497	Uncharacterized protein	LYCR01000050	ABOM_006191	A0A1F7ZZA4	GI:1084339114|EMBL-CDS:OGM44790.1	#0000FF	Aspergillus bombycis.	A0A1F7ZZA4	415	A0A1F7ZZA4	Aspergillus bombycis
2	497	Uncharacterized protein	MVDW01000028	BST61_czeina28g000820	A0A2I0RWW2	EMBL-CDS:PKS00035.1	#0000FF	Cercospora zeina.	A0A2I0RWW2	772	A0A2I0RWW2	Cercospora zeina
2	497	Glycoside hydrolase	LFIW01001518	CI238_06737	A0A167C397	GI:1020449050|EMBL-CDS:KZL82073.1	#0000FF	Colletotrichum incanum.	A0A167C397	411	A0A167C397	Colletotrichum incanum
2	497	Uncharacterized protein	MSZS01000002	P174DRAFT_82973	A0A2I1CG34	EMBL-CDS:PKX96593.1	#0000FF	Aspergillus novofumigatus IBT 16806.	A0A2I1CG34	418	A0A2I1CG34	Aspergillus novofumigatus IBT 16806
2	497	Uncharacterized protein	KZ559591	BDW42DRAFT_176434	A0A2J5HKI0	EMBL-CDS:PLN77653.1	#0000FF	Aspergillus taichungensis.	A0A2J5HKI0	393	A0A2J5HKI0	Aspergillus taichungensis
2	497	Uncharacterized protein	OGUI01000002	ATCC64974_9000	A0A2K4ZTZ0	EMBL-CDS:SPB43254.1	#0000FF	Aspergillus niger.	A0A2K4ZTZ0	409	A0A2K4ZTZ0	Aspergillus niger
2	497	Aspergillus niger contig An09c0150| genomic contig	AM270204	An09g05170	A2QUC6	GI:134078378|GI:145242510|EMBL-CDS:CAK40369.1|REFSEQ:XP_001393828.1	#0000FF	Aspergillus niger (strain CBS 513.88 / FGSC A1513)	A2QUC6	409	A2QUC6	Aspergillus niger CBS 513.88
2	497	Uncharacterized protein	ACJE01000001	ASPNIDRAFT_202949	G3XLH0	GI:350640129|EMBL-CDS:EHA28482.1	#0000FF	Aspergillus niger (strain ATCC 1015 / CBS 113.46 / FGSC A1144 / LSHBAc4 / NCTC 3858a / NRRL 328 / USDA 3528.7)	G3XLH0	404	G3XLH0	Aspergillus niger ATCC 1015
2	497	Uncharacterized protein	JH767555	W97_00512	R7YHL4	GI:667824890|GI:494823980|EMBL-CDS:EON61299.1|REFSEQ:XP_007776616.1	#0000FF	Coniosporium apollinis (strain CBS 100218)	R7YHL4	341	R7YHL4	Coniosporium apollinis CBS 100218
2	497	Uncharacterized protein	KV875100	CONLIGDRAFT_671932	A0A1J7IG10	GI:1102743800|EMBL-CDS:OIW26349.1	#0000FF	Coniochaeta ligniaria NRRL 30616.	A0A1J7IG10	393	A0A1J7IG10	Coniochaeta ligniaria NRRL 30616
2	497	Uncharacterized protein	MDYN01000004	PENANT_c004G08794	A0A1V6QGI2	GI:1168087476|EMBL-CDS:OQD88330.1	#0000FF	Penicillium antarcticum.	A0A1V6QGI2	421	A0A1V6QGI2	Penicillium antarcticum
2	497	Uncharacterized protein	DS027686	NFIA_039100	A1D014	GI:119498947|GI:119414395|EMBL-CDS:EAW24334.1|REFSEQ:XP_001266231.1	#0000FF	Neosartorya fischeri (strain ATCC 1020 / DSM 3700 / CBS 544.65 / FGSCA1164 / JCM 1740 / NRRL 181 / WB 181)	A1D014	418	A1D014	Aspergillus fischeri NRRL 181
2	497	Uncharacterized protein	GL891107	NEUTE2DRAFT_148484	G4UGB3	GI:350294227|EMBL-CDS:EGZ75312.1	#0000FF	Neurospora tetrasperma (strain FGSC 2509 / P0656)	G4UGB3	397	G4UGB3	Neurospora tetrasperma FGSC 2509
2	497	Uncharacterized protein	KV441417	VC83_08849	A0A176ZXK0	GI:1026902394|EMBL-CDS:OAF54618.1	#0000FF	Pseudogymnoascus destructans.	A0A176ZXK0	408	A0A176ZXK0	Pseudogymnoascus destructans
2	497	Uncharacterized protein	JH767561	W97_02275	R7YMF3	GI:494825918|GI:667828391|EMBL-CDS:EON63048.1|REFSEQ:XP_007778365.1	#0000FF	Coniosporium apollinis (strain CBS 100218)	R7YMF3	384	R7YMF3	Coniosporium apollinis CBS 100218
2	497	Endoglucanase	BCWF01000023	RIB2604_02301700	A0A146FRP5	EMBL-CDS:GAT27812.1	#0000FF	Aspergillus luchuensis.	A0A146FRP5	410	A0A146FRP5	Aspergillus luchuensis
2	497	Uncharacterized protein	KV441503	CC77DRAFT_1002005	A0A177D3L9	GI:1070564506|GI:1027153647|EMBL-CDS:OAG14048.1|REFSEQ:XP_018379469.1	#0000FF	Alternaria alternata	A0A177D3L9	394	A0A177D3L9	Alternaria alternata
2	497	Lytic polysaccharide monooxygenase	KV878248	ASPFODRAFT_99088	A0A1M3T684	GI:1114057253|EMBL-CDS:OJZ82260.1	#0000FF	Aspergillus luchuensis CBS 106.47.	A0A1M3T684	405	A0A1M3T684	Aspergillus luchuensis CBS 106.47
2	497	Uncharacterized protein	CH476616	UREG_03922	C4JM64	GI:237904675|GI:258571203|EMBL-CDS:EEP79076.1|REFSEQ:XP_002544405.1	#0000FF	Uncinocarpus reesii (strain UAMH 1704)	C4JM64	419	C4JM64	Uncinocarpus reesii 1704
2	497	Endoglucanase	DF126462	AKAW_06404	G7XMK6	GI:358371683|EMBL-CDS:GAA88290.1	#0000FF	Aspergillus kawachii (strain NBRC 4308)	G7XMK6	410	G7XMK6	Aspergillus kawachii IFO 4308
2	497	Uncharacterized protein	BBXM01000057	AUD_3627	A0A0K8L959	EMBL-CDS:GAO84667.1	#0000FF	Aspergillus udagawae.	A0A0K8L959	420	A0A0K8L959	Aspergillus udagawae
2	497	Uncharacterized protein	JXNT01000003	SI65_03984	A0A1E3BJH7	GI:1060925634|EMBL-CDS:ODM20931.1	#0000FF	Aspergillus cristatus.	A0A1E3BJH7	415	A0A1E3BJH7	Aspergillus cristatus
2	497	Uncharacterized protein	NKHV01000331	CDV55_09856	A0A229YGF7	GI:1220554083|GI:1220577228|EMBL-CDS:OXN12385.1|EMBL-CDS:OXN31429.1	#0000FF	Aspergillus turcosus.	A0A229YGF7	414	A0A229YGF7	Aspergillus turcosus
2	497	Uncharacterized protein	DS231615	PTRG_00673	B2VSG9	GI:187972612|GI:189189334|EMBL-CDS:EDU40111.1|REFSEQ:XP_001931006.1	#0000FF	Pyrenophora tritici-repentis (strain Pt-1C-BFP)	B2VSG9	400	B2VSG9	Pyrenophora tritici-repentis Pt-1C-BFP
2	497	Uncharacterized protein	KV460227	VE01_05350	A0A1B8GKY5	GI:1069471723|GI:1040561041|EMBL-CDS:OBT96501.1|REFSEQ:XP_018130234.1	#0000FF	Pseudogymnoascus verrucosus.	A0A1B8GKY5	408	A0A1B8GKY5	Pseudogymnoascus verrucosus
2	497	Uncharacterized protein	EQ963482	AFLA_005720	B8NR97	GI:238503077|GI:220691582|EMBL-CDS:EED47930.1|REFSEQ:XP_002382772.1	#0000FF	Aspergillus flavus (strain ATCC 200026 / FGSC A1120 / NRRL 3357 / JCM12722 / SRRC 167)	B8NR97	421	B8NR97	Aspergillus flavus NRRL3357
2	497	Uncharacterized protein	AKHY01000122	Ao3042_03704	I8A5D4	GI:391870642|EMBL-CDS:EIT79819.1	#0000FF	Aspergillus oryzae (strain 3.042)	I8A5D4	417	I8A5D4	Aspergillus oryzae 3.042
2	497	Uncharacterized protein	CM002241	NCU05932	Q7S0P1	GI:758998269|GI:553135251|EMBL-CDS:EAA28891.2|REFSEQ:XP_958127.2	#0000FF	Neurospora crassa (strain ATCC 24698 / 74-OR23-1A / CBS 708.71 / DSM1257 / FGSC 987)	Q7S0P1	492	Q7S0P1	Neurospora crassa OR74A
2	497	Uncharacterized protein	BAUL01000061	PVAR5_2180	V5FNQ0	EMBL-CDS:GAD93568.1	#0000FF	Byssochlamys spectabilis (strain No. 5 / NBRC 109023)	V5FNQ0	406	V5FNQ0	Byssochlamys spectabilis No. 5
2	497	Uncharacterized protein	JZDT01000272	AFLA70_78g002440	A0A0D9N6Z7	GI:768708137|EMBL-CDS:KJJ34613.1	#0000FF	Aspergillus flavus (strain ATCC MYA-384 / AF70)	A0A0D9N6Z7	407	A0A0D9N6Z7	Aspergillus flavus AF70
2	497	Uncharacterized protein	KQ964248	Micbo1qcDRAFT_50644	A0A136J6H8	GI:1000223726|EMBL-CDS:KXJ92729.1	#0000FF	Microdochium bolleyi.	A0A136J6H8	389	A0A136J6H8	Microdochium bolleyi
2	497	Uncharacterized protein	KV441395	VC83_06261	A0A177A9H8	GI:1026906574|EMBL-CDS:OAF58776.1	#0000FF	Pseudogymnoascus destructans.	A0A177A9H8	383	A0A177A9H8	Pseudogymnoascus destructans
2	497	Uncharacterized protein	KV878180	ASPTUDRAFT_90371	A0A1L9NFU9	GI:1111701249|EMBL-CDS:OJI88178.1	#0000FF	Aspergillus tubingensis CBS 134.48.	A0A1L9NFU9	424	A0A1L9NFU9	Aspergillus tubingensis CBS 134.48
2	497	Uncharacterized protein	MKZY01000003	OAory_01082730	A0A1S9DRT1	GI:1150477039|EMBL-CDS:OOO11803.1	#0000FF	Aspergillus oryzae	A0A1S9DRT1	421	A0A1S9DRT1	Aspergillus oryzae
2	497	Uncharacterized protein	LKMD01000106	CB0940_09458	A0A2G5HGA9	EMBL-CDS:PIA91580.1	#0000FF	Cercospora beticola	A0A2G5HGA9	472	A0A2G5HGA9	Cercospora beticola
2	497	Uncharacterized protein	GL573180	GMDG_01066	L8FS56	GI:831339218|GI:440632622|EMBL-CDS:ELR02541.1|REFSEQ:XP_012739462.1	#0000FF	Pseudogymnoascus destructans (strain ATCC MYA-4855 / 20631-21)	L8FS56	408	L8FS56	Pseudogymnoascus destructans 20631-21
2	497	Uncharacterized protein	NEXV01000414	AARAC_006350	A0A2G7FTT4	EMBL-CDS:PIG84022.1	#0000FF	Aspergillus arachidicola.	A0A2G7FTT4	417	A0A2G7FTT4	Aspergillus arachidicola
2	497	Uncharacterized protein	GL537334	PTT_18064	E3S5V6	GI:330936147|GI:311317767|EMBL-CDS:EFQ86636.1|REFSEQ:XP_003305261.1	#0000FF	Pyrenophora teres f. teres (strain 0-1)	E3S5V6	400	E3S5V6	Pyrenophora teres f. teres 0-1
2	497	Uncharacterized protein	GL573459	GMDG_08049	L8G3Q7	GI:831353330|GI:440636657|EMBL-CDS:ELR06576.1|REFSEQ:XP_012746508.1	#0000FF	Pseudogymnoascus destructans (strain ATCC MYA-4855 / 20631-21)	L8G3Q7	353	L8G3Q7	Pseudogymnoascus destructans 20631-21
2	497	Uncharacterized protein	AP007162	AO090102000501	Q2UA85	GI:567755489|GI:567755491|GI:83771398|EMBL-CDS:BAE61530.1	#0000FF	Aspergillus oryzae (strain ATCC 42149 / RIB 40)	Q2UA85	421	Q2UA85	Aspergillus oryzae RIB40
2	497	Uncharacterized protein	KQ087363	Y699_00264	A0A0J5PRA1	GI:846913235|EMBL-CDS:KMK59063.1	#0000FF	Aspergillus fumigatus Z5.	A0A0J5PRA1	418	A0A0J5PRA1	Aspergillus fumigatus Z5
2	497	Uncharacterized protein	CVMT01000003	PISL3812_04451	A0A0U1LVK2	EMBL-CDS:CRG87434.1	#0000FF	Talaromyces islandicus	A0A0U1LVK2	401	A0A0U1LVK2	Talaromyces islandicus
2	497	Endoglucanase	BCMY01000010	ABL_06453	A0A117E2M7	EMBL-CDS:GAQ43792.1	#0000FF	Aspergillus niger.	A0A117E2M7	435	A0A117E2M7	Aspergillus niger
2	497	Uncharacterized protein	LGRN01000308	AJ78_06185	A0A1J9PBE0	GI:1103675982|EMBL-CDS:OJD13350.1	#0000FF	Emergomyces pasteuriana Ep9510.	A0A1J9PBE0	431	A0A1J9PBE0	Emergomyces pasteuriana Ep9510
2	497	Lytic polysaccharide monooxygenase	KV907502	ASPCADRAFT_208829	A0A1R3RIJ2	GI:1147628745|EMBL-CDS:OOF94312.1	#0000FF	Aspergillus carbonarius (strain ITEM 5010)	A0A1R3RIJ2	412	A0A1R3RIJ2	Aspergillus carbonarius ITEM 5010
2	497	Uncharacterized protein	NKHT01000249	CDV57_08916	A0A229XRC4	GI:1220565703|EMBL-CDS:OXN22739.1	#0000FF	Neosartorya fumigata	A0A229XRC4	418	A0A229XRC4	Aspergillus fumigatus
2	497	Endoglucanase	JFFI01001450	CSAL01_06033	A0A135UHJ9	GI:996635155|EMBL-CDS:KXH59879.1	#0000FF	Colletotrichum salicis.	A0A135UHJ9	403	A0A135UHJ9	Colletotrichum salicis
2	497	Uncharacterized protein	DS499597	AFUB_051520	B0Y2P8	GI:159126034|EMBL-CDS:EDP51150.1	#0000FF	Neosartorya fumigata (strain CEA10 / CBS 144.89 / FGSC A1163)	B0Y2P8	418	B0Y2P8	Aspergillus fumigatus A1163
2	497	Uncharacterized protein	GL536689	PTT_16375	E3S266	GI:311319697|GI:330932922|EMBL-CDS:EFQ87921.1|REFSEQ:XP_003303971.1	#0000FF	Pyrenophora teres f. teres (strain 0-1)	E3S266	418	E3S266	Pyrenophora teres f. teres 0-1
2	497	Uncharacterized protein	GL891307	NEUTE1DRAFT_141028	F8MVE1	GI:336466579|GI:698995378|EMBL-CDS:EGO54744.1|REFSEQ:XP_009854670.1	#0000FF	Neurospora tetrasperma (strain FGSC 2508 / ATCC MYA-4615 / P0657)	F8MVE1	481	F8MVE1	Neurospora tetrasperma FGSC 2508
2	497	Uncharacterized protein	GL891269	NEUTE2DRAFT_28764	G4V140	GI:350286531|EMBL-CDS:EGZ67778.1	#0000FF	Neurospora tetrasperma (strain FGSC 2509 / P0656)	G4V140	544	G4V140	Neurospora tetrasperma FGSC 2509
2	497	Uncharacterized protein	AAHF01000011	AFUA_5G03010	Q4WEH3	GI:70985072|GI:66845670|EMBL-CDS:EAL86004.1|REFSEQ:XP_748042.1	#0000FF	Neosartorya fumigata (strain ATCC MYA-4609 / Af293 / CBS 101355 / FGSCA1100)	Q4WEH3	418	Q4WEH3	Aspergillus fumigatus Af293
2	497	Lytic polysaccharide monooxygenase	KN389642	GE21DRAFT_9419	A0A0B0E5G0	GI:725984584|EMBL-CDS:KHE87549.1	#0000FF	Neurospora crassa.	A0A0B0E5G0	490	A0A0B0E5G0	Neurospora crassa
2	497	Uncharacterized protein	KN847042	PV07_05303	A0A0D2CH49	GI:1022881530|GI:759252826|EMBL-CDS:KIW29490.1|REFSEQ:XP_016249706.1	#0000FF	Cladophialophora immunda.	A0A0D2CH49	391	A0A0D2CH49	Cladophialophora immunda
2	497	Uncharacterized protein	KN847042	PV07_05303	A0A0D2D153	GI:759252825|GI:1022881526|EMBL-CDS:KIW29489.1|REFSEQ:XP_016249705.1	#0000FF	Cladophialophora immunda.	A0A0D2D153	408	A0A0D2D153	Cladophialophora immunda
2	497	Uncharacterized protein	KB908855	SETTUDRAFT_73750	R0IA24	GI:482805226|GI:636597689|EMBL-CDS:EOA82325.1|REFSEQ:XP_008030183.1	#0000FF	Setosphaeria turcica (strain 28A)	R0IA24	401	R0IA24	Exserohilum turcica Et28A
2	497	Uncharacterized protein	CDMC01000002	ASPCAL02778	A0A0U5CNC4	EMBL-CDS:CEN60337.1	#0000FF	Aspergillus calidoustus.	A0A0U5CNC4	414	A0A0U5CNC4	Aspergillus calidoustus
2	497	Endoglucanase	MJBS01000065	CORC01_07878	A0A1G4B611	GI:1088688373|EMBL-CDS:OHE96732.1	#0000FF	Colletotrichum orchidophilum.	A0A1G4B611	402	A0A1G4B611	Colletotrichum orchidophilum
2	497	Uncharacterized protein	KN294041	PAAG_08889	C1HDN2	GI:1002923808|GI:701688657|EMBL-CDS:EEH40026.2|REFSEQ:XP_002789213.2	#0000FF	Paracoccidioides lutzii (strain ATCC MYA-826 / Pb01)	C1HDN2	439	C1HDN2	Paracoccidioides lutzii Pb01
2	497	Uncharacterized protein	KB445584	COCHEDRAFT_1115227	M2UFH9	GI:451994277|EMBL-CDS:EMD86748.1	#0000FF	Cochliobolus heterostrophus (strain C5 / ATCC 48332 / race O)	M2UFH9	376	M2UFH9	Bipolaris maydis C5
2	497	Uncharacterized protein	KB733461	COCC4DRAFT_143749	N4WUL4	GI:928516504|GI:477586054|EMBL-CDS:ENI03140.1|REFSEQ:XP_014077049.1	#0000FF	Cochliobolus heterostrophus (strain C4 / ATCC 48331 / race T)	N4WUL4	376	N4WUL4	Bipolaris maydis ATCC 48331
2	497	Uncharacterized protein	JNOM01000017	ANOM_002012	A0A0L1JFU4	GI:910298738|GI:992228716|EMBL-CDS:KNG90253.1|REFSEQ:XP_015411176.1	#0000FF	Aspergillus nomius NRRL 13137.	A0A0L1JFU4	410	A0A0L1JFU4	Aspergillus nomius NRRL 13137
2	497	Uncharacterized protein	GG657449	BDBG_01424	A0A179UAT0	GI:1033924096|GI:261202604|EMBL-CDS:OAT04950.1|REFSEQ:XP_002628516.1	#0000FF	Blastomyces gilchristii (strain SLH14081)	A0A179UAT0	393	A0A179UAT0	Blastomyces gilchristii SLH14081
2	497	Uncharacterized protein	LZYO01000036	ACO22_01475	A0A1D2JLF2	GI:1059627656|EMBL-CDS:ODH41024.1	#0000FF	Paracoccidioides brasiliensis.	A0A1D2JLF2	833	A0A1D2JLF2	Paracoccidioides brasiliensis
2	497	Uncharacterized protein	LFMY01000001	UA08_00450	A0A225B9B3	GI:1147813098|GI:1118544297|EMBL-CDS:OKL63986.1|REFSEQ:XP_020124107.1	#0000FF	Talaromyces atroroseus.	A0A225B9B3	394	A0A225B9B3	Talaromyces atroroseus
2	497	Uncharacterized protein	NPHW01004802	Egran_04729	A0A232LTM2	GI:1227549323|EMBL-CDS:OXV07505.1	#0000FF	Elaphomyces granulatus.	A0A232LTM2	375	A0A232LTM2	Elaphomyces granulatus
2	497	Uncharacterized protein	KN305539	PABG_05411	C0SCK6	GI:719931287|EMBL-CDS:EEH23200.2	#0000FF	Paracoccidioides brasiliensis (strain Pb03)	C0SCK6	442	C0SCK6	Paracoccidioides brasiliensis Pb03
2	497	Uncharacterized protein	ABSU01000006	ARB_06893	D4AR64	GI:302506352|GI:291178704|EMBL-CDS:EFE34493.1|REFSEQ:XP_003015133.1	#0000FF	Arthroderma benhamiae (strain ATCC MYA-4681 / CBS 112371)	D4AR64	414	D4AR64	Trichophyton benhamiae CBS 112371
2	497	Uncharacterized protein	JEMN01001236	CNYM01_03055	A0A135T5A4	GI:996605820|EMBL-CDS:KXH43326.1	#0000FF	Colletotrichum nymphaeae SA-01.	A0A135T5A4	407	A0A135T5A4	Colletotrichum nymphaeae SA-01
2	497	Uncharacterized protein	ACYE01000339	TRV_05945	D4DFJ4	GI:291183754|GI:302656446|EMBL-CDS:EFE39352.1|REFSEQ:XP_003019976.1	#0000FF	Trichophyton verrucosum (strain HKI 0517)	D4DFJ4	414	D4DFJ4	Trichophyton verrucosum HKI 0517
2	497	Uncharacterized protein	GG749430	BDDG_05089	F2TFY3	GI:327353289|EMBL-CDS:EGE82146.1	#0000FF	Ajellomyces dermatitidis (strain ATCC 18188 / CBS 674.68)	F2TFY3	390	F2TFY3	Blastomyces dermatitidis ATCC 18188
2	497	WGS project CABT00000000 data| contig 2.29	CABT02000029	SMAC_06957	F7W4W2	GI:336268715|EMBL-CDS:CCC12549.1|REFSEQ:XP_003349120.1	#0000FF	Sordaria macrospora (strain ATCC MYA-333 / DSM 997 / K(L3346)	F7W4W2	692	F7W4W2	Sordaria macrospora k-hell
2	497	Uncharacterized protein	KB446535	DOTSEDRAFT_49429	N1Q381	GI:452847173|EMBL-CDS:EME49105.1	#0000FF	Dothistroma septosporum (strain NZE10 / CBS 128990)	N1Q381	398	N1Q381	Dothistroma septosporum NZE10
2	497	Uncharacterized protein	GL538394	BDFG_04625	T5BJW2	GI:531982900|EMBL-CDS:EQL33487.1	#0000FF	Blastomyces dermatitidis ATCC 26199.	T5BJW2	393	T5BJW2	Blastomyces dermatitidis ATCC 26199
2	497	Uncharacterized protein	AOKY01000240	H109_03344	A0A059JAE2	GI:633048484|EMBL-CDS:KDB24815.1	#0000FF	Trichophyton interdigitale MR816.	A0A059JAE2	416	A0A059JAE2	Trichophyton interdigitale MR816
2	497	Uncharacterized protein	LFZN01000037	AC578_5401	A0A139HK54	GI:1002207283|EMBL-CDS:KXT02786.1	#0000FF	Mycosphaerella eumusae.	A0A139HK54	404	A0A139HK54	Mycosphaerella eumusae
2	497	Uncharacterized protein	LFZO01000329	AC579_3038	A0A139I4J1	GI:1002214362|EMBL-CDS:KXT09539.1	#0000FF	Pseudocercospora musae.	A0A139I4J1	398	A0A139I4J1	Pseudocercospora musae
2	497	Uncharacterized protein	KV441680	IQ07DRAFT_462881	A0A178DGL6	GI:1029178028|EMBL-CDS:OAL42630.1	#0000FF	Pyrenochaeta sp. DS3sAY3a.	A0A178DGL6	192	A0A178DGL6	Pyrenochaeta sp. DS3sAY3a
2	497	Uncharacterized protein	KV878338	ASPZODRAFT_60375	A0A1L9SP27	GI:1111876590|EMBL-CDS:OJJ48958.1	#0000FF	Penicilliopsis zonata CBS 506.65.	A0A1L9SP27	424	A0A1L9SP27	Penicilliopsis zonata CBS 506.65
2	497	Uncharacterized protein	JFBX01000126	CSIM01_10069	A0A135TKV5	GI:996614482|EMBL-CDS:KXH48772.1	#0000FF	Colletotrichum simmondsii.	A0A135TKV5	407	A0A135TKV5	Colletotrichum simmondsii
2	497	Uncharacterized protein	PDNC01000076	GX51_05434	A0A2B7WXF5	EMBL-CDS:PGH01118.1	#0000FF	Emmonsia parva.	A0A2B7WXF5	427	A0A2B7WXF5	Emmonsia parva
2	497	Uncharacterized protein	BFBS01015923	TMEN_3304	A0A2P2EIG3	EMBL-CDS:GBF60848.1	#0000FF	Trichophyton mentagrophytes.	A0A2P2EIG3	416	A0A2P2EIG3	Trichophyton mentagrophytes
2	497	Uncharacterized protein	CH476655	HCAG_00471	A6QSW5	GI:154285260|GI:150407066|EMBL-CDS:EDN02607.1|REFSEQ:XP_001543425.1	#0000FF	Ajellomyces capsulatus (strain NAm1 / WU24)	A6QSW5	410	A6QSW5	Histoplasma capsulatum NAm1
2	497	Uncharacterized protein	DS995702	MCYG_01889	C5FI90	GI:238839408|GI:296817237|EMBL-CDS:EEQ29070.1|REFSEQ:XP_002848955.1	#0000FF	Arthroderma otae (strain ATCC MYA-4605 / CBS 113480)	C5FI90	414	C5FI90	Microsporum canis CBS 113480
2	497	Uncharacterized protein	DS990640	HCEG_06193	F0UPM5	GI:325093668|EMBL-CDS:EGC46978.1	#0000FF	Ajellomyces capsulatus (strain H88)	F0UPM5	412	F0UPM5	Histoplasma capsulatum H88
2	497	Extracellular protein	DS995731	TEQG_03130	F2PQD0	GI:326480088|EMBL-CDS:EGE04098.1	#0000FF	Trichophyton equinum (strain ATCC MYA-4606 / CBS 127.97)	F2PQD0	416	F2PQD0	Trichophyton equinum CBS 127.97
2	497	Uncharacterized protein	CH476607	ATEG_09277	Q0CAK7	GI:114188714|GI:115437786|EMBL-CDS:EAU30414.1|REFSEQ:XP_001217899.1	#0000FF	Aspergillus terreus (strain NIH 2624 / FGSC A1156)	Q0CAK7	411	Q0CAK7	Aspergillus terreus NIH2624
2	497	Copper-dependent polysaccharide monooxygenase	LASV01000418	T310_7247	A0A0F4YKJ0	GI:915138154|GI:802088851|EMBL-CDS:KKA18807.1|REFSEQ:XP_013325419.1	#0000FF	Rasamsonia emersonii CBS 393.64.	A0A0F4YKJ0	418	A0A0F4YKJ0	Rasamsonia emersonii CBS 393.64
2	497	Uncharacterized protein	LYUC01000006	GX48_01016	A0A1E2YD79	GI:1059640478|EMBL-CDS:ODH52822.1	#0000FF	Paracoccidioides brasiliensis.	A0A1E2YD79	442	A0A1E2YD79	Paracoccidioides brasiliensis
2	497	Uncharacterized protein	DS231621	PTRG_07036	B2WBM3	GI:189202064|GI:187984467|EMBL-CDS:EDU49955.1|REFSEQ:XP_001937368.1	#0000FF	Pyrenophora tritici-repentis (strain Pt-1C-BFP)	B2WBM3	416	B2WBM3	Pyrenophora tritici-repentis Pt-1C-BFP
2	497	Uncharacterized protein	MPGH01000185	CCHL11_04054	A0A1Q8RKW1	GI:1128256193|EMBL-CDS:OLN84957.1	#0000FF	Colletotrichum chlorophyti.	A0A1Q8RKW1	413	A0A1Q8RKW1	Colletotrichum chlorophyti
2	497	Uncharacterized protein	DS989824	MGYG_04176	E4UV55	GI:311341969|GI:315049255|EMBL-CDS:EFR01172.1|REFSEQ:XP_003174002.1	#0000FF	Arthroderma gypseum (strain ATCC MYA-4604 / CBS 118893)	E4UV55	423	E4UV55	Nannizzia gypsea CBS 118893
2	497	Lytic polysaccharide monooxygenase	KI963949	COCMIDRAFT_34762	W6ZJS0	GI:576934177|GI:627827652|EMBL-CDS:EUC47694.1|REFSEQ:XP_007685753.1	#0000FF	Bipolaris oryzae ATCC 44560.	W6ZJS0	435	W6ZJS0	Bipolaris oryzae ATCC 44560
2	497	Uncharacterized protein	JYKN01003368	AOCH_004045	A0A0F8W4L7	GI:816331618|EMBL-CDS:KKK12855.1	#0000FF	Aspergillus ochraceoroseus.	A0A0F8W4L7	393	A0A0F8W4L7	Aspergillus ochraceoroseus
2	497	Uncharacterized protein	JZBS01000381	ARAM_005422	A0A0F8XSB6	GI:816352176|EMBL-CDS:KKK26422.1	#0000FF	Aspergillus rambellii.	A0A0F8XSB6	393	A0A0F8XSB6	Aspergillus rambellii
2	497	Lytic polysaccharide monooxygenase	LGLR01000130	TW65_09345	A0A0L1I3I8	GI:909995446|EMBL-CDS:KNG52832.1	#0000FF	Stemphylium lycopersici.	A0A0L1I3I8	372	A0A0L1I3I8	Stemphylium lycopersici
2	497	Uncharacterized protein	LGUA01000185	ACJ72_02281	A0A1B7P2U5	GI:1035641647|EMBL-CDS:OAX83355.1	#0000FF	Emmonsia sp. CAC-2015a.	A0A1B7P2U5	412	A0A1B7P2U5	Emmonsia sp. CAC-2015a
2	497	Uncharacterized protein	GG663371	HCBG_06444	C0NTG4	GI:225557038|EMBL-CDS:EEH05325.1	#0000FF	Ajellomyces capsulatus (strain G186AR / H82 / ATCC MYA-2454 / RMSCC2432)	C0NTG4	412	C0NTG4	Histoplasma capsulatum G186AR
2	497	Uncharacterized protein	KV878138	ASPVEDRAFT_89188	A0A1L9Q2G7	GI:1111721286|EMBL-CDS:OJJ07954.1	#0000FF	Aspergillus versicolor CBS 583.65.	A0A1L9Q2G7	402	A0A1L9Q2G7	Aspergillus versicolor CBS 583.65
2	497	Uncharacterized protein	KV878688	ASPBRDRAFT_277377	A0A1L9UCK9	GI:1111903441|EMBL-CDS:OJJ69424.1	#0000FF	Aspergillus brasiliensis CBS 101740.	A0A1L9UCK9	413	A0A1L9UCK9	Aspergillus brasiliensis CBS 101740
2	497	Uncharacterized protein	KB020507	CGGC5_3835	L2GEW9	GI:429861905|GI:596657029|EMBL-CDS:ELA36568.1|REFSEQ:XP_007274339.1	#0000FF	Colletotrichum gloeosporioides (strain Nara gc5)	L2GEW9	412	L2GEW9	Colletotrichum gloeosporioides Nara gc5
2	497	Uncharacterized protein	KN275963	PADG_05722	C1GEN6	GI:226294223|GI:734682301|EMBL-CDS:EEH49643.1|REFSEQ:XP_010761386.1	#0000FF	Paracoccidioides brasiliensis (strain Pb18)	C1GEN6	442	C1GEN6	Paracoccidioides brasiliensis Pb18
2	497	Uncharacterized protein	GG698478	TESG_00502	F2RNN6	GI:326468933|EMBL-CDS:EGD92942.1	#0000FF	Trichophyton tonsurans (strain CBS 112818)	F2RNN6	416	F2RNN6	Trichophyton tonsurans CBS 112818
2	497	Uncharacterized protein	KN846951	PV11_02705	A0A0D1YX57	GI:759209791|EMBL-CDS:KIV87137.1	#0000FF	Exophiala sideris.	A0A0D1YX57	389	A0A0D1YX57	Exophiala sideris
2	497	Uncharacterized protein	LHPN01000006	A7D00_4237	A0A178FHD7	GI:1030006676|EMBL-CDS:OAL71336.1	#0000FF	Trichophyton violaceum.	A0A178FHD7	418	A0A178FHD7	Trichophyton violaceum
2	497	Uncharacterized protein	LGTZ01000012	ACJ73_00202	A0A1J9QIU6	GI:1103694237|EMBL-CDS:OJD28393.1	#0000FF	Blastomyces percursus.	A0A1J9QIU6	427	A0A1J9QIU6	Blastomyces percursus
2	497	Uncharacterized protein	KB908814	SETTUDRAFT_164498	R0IH30	GI:636594589|GI:482807244|EMBL-CDS:EOA84296.1|REFSEQ:XP_008028633.1	#0000FF	Setosphaeria turcica (strain 28A)	R0IH30	419	R0IH30	Exserohilum turcica Et28A
2	497	Lytic polysaccharide monooxygenase	KI964633	COCCADRAFT_98725	W6Y3D1	GI:628211476|GI:576918247|EMBL-CDS:EUC32448.1|REFSEQ:XP_007713258.1	#0000FF	Bipolaris zeicola 26-R-13.	W6Y3D1	416	W6Y3D1	Bipolaris zeicola 26-R-13
2	497	Lytic polysaccharide monooxygenase	KI968714	COCVIDRAFT_35839	W7EMD2	GI:578491787|GI:953433439|EMBL-CDS:EUN29191.1|REFSEQ:XP_014558791.1	#0000FF	Bipolaris victoriae FI3.	W7EMD2	416	W7EMD2	Bipolaris victoriae FI3
2	497	Uncharacterized protein	KK207857	H103_04741	A0A022W142	GI:607916009|EMBL-CDS:EZF52007.1	#0000FF	Trichophyton rubrum CBS 288.86.	A0A022W142	418	A0A022W142	Trichophyton rubrum CBS 288.86
2	497	Uncharacterized protein	CH408030	CHGG_02447	Q2HBF7	GI:116206308|GI:88183044|EMBL-CDS:EAQ90512.1|REFSEQ:XP_001228963.1	#0000FF	Chaetomium globosum (strain ATCC 6205 / CBS 148.51 / DSM 1962 / NBRC6347 / NRRL 1970)	Q2HBF7	265	Q2HBF7	Chaetomium globosum CBS 148.51
2	497	Uncharacterized protein	KK208859	H105_04758	A0A022XRJ2	GI:607940042|EMBL-CDS:EZF73287.1	#0000FF	Trichophyton soudanense CBS 452.61.	A0A022XRJ2	418	A0A022XRJ2	Trichophyton soudanense CBS 452.61
2	497	Uncharacterized protein	KV441501	CC77DRAFT_568662	A0A177D4W4	GI:1027153878|GI:1070563994|EMBL-CDS:OAG14277.1|REFSEQ:XP_018379698.1	#0000FF	Alternaria alternata	A0A177D4W4	418	A0A177D4W4	Alternaria alternata
2	497	Uncharacterized protein	KV441644	IQ07DRAFT_566550	A0A178E5C2	GI:1029185973|EMBL-CDS:OAL50539.1	#0000FF	Pyrenochaeta sp. DS3sAY3a.	A0A178E5C2	379	A0A178E5C2	Pyrenochaeta sp. DS3sAY3a
2	497	Uncharacterized protein	LHPM01000012	A7C99_2254	A0A178F3Y9	GI:861303346|GI:1030002044|EMBL-CDS:OAL66858.1	#0000FF	Trichophyton rubrum	A0A178F3Y9	418	A0A178F3Y9	Trichophyton rubrum
2	497	Uncharacterized protein	GG700651	TERG_04504	F2SNJ5	GI:326462803|GI:327301517|EMBL-CDS:EGD88256.1|REFSEQ:XP_003235451.1	#0000FF	Trichophyton rubrum (strain ATCC MYA-4607 / CBS 118892)	F2SNJ5	418	F2SNJ5	Trichophyton rubrum CBS 118892
2	497	Uncharacterized protein	LAQI01000116	UCDDS831_g05601	A0A0G2E8P0	GI:821063677|EMBL-CDS:KKY18969.1	#0000FF	Diplodia seriata.	A0A0G2E8P0	320	A0A0G2E8P0	Diplodia seriata
2	497	Lytic polysaccharide monooxygenase	MNUE01000006	BKCO1_600090	A0A1J9RB08	GI:1103751290|EMBL-CDS:OJD37736.1	#0000FF	Diplodia corticola.	A0A1J9RB08	359	A0A1J9RB08	Diplodia corticola
2	497	Uncharacterized protein	KV878596	ASPSYDRAFT_505109	A0A1L9T330	GI:1111885335|EMBL-CDS:OJJ53852.1	#0000FF	Aspergillus sydowii CBS 593.65.	A0A1L9T330	400	A0A1L9T330	Aspergillus sydowii CBS 593.65
2	497	Uncharacterized protein	MSZU01000075	BK809_0003007	A0A1S8BL20	GI:1137654851|EMBL-CDS:OMP88250.1	#0000FF	Diplodia seriata.	A0A1S8BL20	365	A0A1S8BL20	Diplodia seriata
2	497	Uncharacterized protein	LT853692	ZT3D7_G1746	A0A1X7RH95	EMBL-CDS:SMQ46600.1	#0000FF	Zymoseptoria tritici ST99CH_3D7.	A0A1X7RH95	354	A0A1X7RH95	Zymoseptoria tritici ST99CH_3D7
2	497	WGS project CABT00000000 data| contig 2.17	CABT02000017	SMAC_04067	F7W0R2	GI:336266910|EMBL-CDS:CCC11364.1|REFSEQ:XP_003348222.1	#0000FF	Sordaria macrospora (strain ATCC MYA-333 / DSM 997 / K(L3346)	F7W0R2	392	F7W0R2	Sordaria macrospora k-hell
2	497	Uncharacterized protein	JPJY01001755	V496_08897	A0A094CH33	GI:682364305|EMBL-CDS:KFY51238.1	#0000FF	Pseudogymnoascus sp. VKM F-4515	A0A094CH33	408	A0A094CH33	Pseudogymnoascus sp. VKM F-4515 (FW-2607)
2	497	Uncharacterized protein	LAFY01004256	TI39_contig4297g00001	A0A0F4G823	GI:796694682|EMBL-CDS:KJX93528.1	#0000FF	Zymoseptoria brevis.	A0A0F4G823	275	A0A0F4G823	Zymoseptoria brevis
2	497	Uncharacterized protein	MDYN01000099	PENANT_c099G03356	A0A1V6PC68	GI:1168072360|GI:1168076402|EMBL-CDS:OQD74242.1|EMBL-CDS:OQD78009.1	#0000FF	Penicillium antarcticum.	A0A1V6PC68	233	A0A1V6PC68	Penicillium antarcticum
2	497	Lytic polysaccharide monooxygenase	LGLR01000295	TW65_07089	A0A0L1HJ04	GI:909988516|EMBL-CDS:KNG46067.1	#0000FF	Stemphylium lycopersici.	A0A0L1HJ04	422	A0A0L1HJ04	Stemphylium lycopersici
2	497	Uncharacterized protein	KV441715	IQ06DRAFT_356642	A0A178AMU8	GI:1028896475|EMBL-CDS:OAK98732.1	#0000FF	Stagonospora sp. SRC1lsM3a.	A0A178AMU8	405	A0A178AMU8	Stagonospora sp. SRC1lsM3a
2	497	Uncharacterized protein	KV441681	IQ07DRAFT_469063	A0A178DF00	GI:1029177985|EMBL-CDS:OAL42588.1	#0000FF	Pyrenochaeta sp. DS3sAY3a.	A0A178DF00	192	A0A178DF00	Pyrenochaeta sp. DS3sAY3a
2	497	Uncharacterized protein		AN8175	A0A1U8QW04	GI:40740007|GI:67902376|EMBL-CDS:EAA59197.1|REFSEQ:XP_681444.1	#0000FF	Emericella nidulans (strain FGSC A4 / ATCC 38163 / CBS 112.46 / NRRL194 / M139)	A0A1U8QW04	418	A0A1U8QW04	Aspergillus nidulans FGSC A4
2	497	Uncharacterized protein	MCFA01000239	BCR34DRAFT_497109	A0A1Y1YGS6	GI:1183371345|EMBL-CDS:ORX97179.1	#0000FF	Clohesyomyces aquaticus.	A0A1Y1YGS6	405	A0A1Y1YGS6	Clohesyomyces aquaticus
2	497	Uncharacterized protein	KB445639	COCSADRAFT_285519	M2TD50	GI:628062541|GI:451853878|EMBL-CDS:EMD67171.1|REFSEQ:XP_007696897.1	#0000FF	Cochliobolus sativus (strain ND90Pr / ATCC 201652)	M2TD50	423	M2TD50	Bipolaris sorokiniana ND90Pr
2	497	Uncharacterized protein	BN001302	ANIA_08175	Q5AU55	GI:67902376|EMBL-CDS:CBF74037.1|REFSEQ:XP_681444.1	#0000FF	Emericella nidulans (strain FGSC A4 / ATCC 38163 / CBS 112.46 / NRRL194 / M139)	Q5AU55	418	Q5AU55	Aspergillus nidulans FGSC A4
2	497	Uncharacterized protein	JPJV01000758	V493_01976	A0A094D6D4	GI:682331152|EMBL-CDS:KFY30342.1	#0000FF	Pseudogymnoascus sp. VKM F-4281	A0A094D6D4	419	A0A094D6D4	Pseudogymnoascus sp. VKM F-4281 (FW-2241)
2	497	Str. FM013	HG793193	PCAMFM013_S060g000019	A0A0G4PXB4	GI:902265741|EMBL-CDS:CRL30809.1	#0000FF	Penicillium camemberti FM 013.	A0A0G4PXB4	284	A0A0G4PXB4	Penicillium camemberti FM 013
2	497	Uncharacterized protein	JYNV01000290	ST47_g9151	A0A162Y0V4	GI:1020698936|EMBL-CDS:KZM19774.1	#0000FF	Didymella rabiei	A0A162Y0V4	446	A0A162Y0V4	Ascochyta rabiei
2	497	Uncharacterized protein	KV441636	IQ07DRAFT_496337	A0A178EKS8	GI:1029192088|EMBL-CDS:OAL56646.1	#0000FF	Pyrenochaeta sp. DS3sAY3a.	A0A178EKS8	328	A0A178EKS8	Pyrenochaeta sp. DS3sAY3a
2	497	Uncharacterized protein	MNBE01000638	PENSUB_7257	A0A1Q5TMU9	GI:1120655620|EMBL-CDS:OKP01550.1	#0000FF	Penicillium subrubescens.	A0A1Q5TMU9	226	A0A1Q5TMU9	Penicillium subrubescens
2	497	Uncharacterized protein	LT854253	ZT1E4_G1729	A0A2H1FNQ3	EMBL-CDS:SMR42951.1	#0000FF	Zymoseptoria tritici ST99CH_1E4.	A0A2H1FNQ3	352	A0A2H1FNQ3	Zymoseptoria tritici ST99CH_1E4
2	497	Uncharacterized protein	KV441706	IQ06DRAFT_73286	A0A178B996	GI:1028903660|EMBL-CDS:OAL05909.1	#0000FF	Stagonospora sp. SRC1lsM3a.	A0A178B996	390	A0A178B996	Stagonospora sp. SRC1lsM3a
2	497	Uncharacterized protein	KV441653	IQ07DRAFT_143090	A0A178DU77	GI:1029182257|EMBL-CDS:OAL46832.1	#0000FF	Pyrenochaeta sp. DS3sAY3a.	A0A178DU77	410	A0A178DU77	Pyrenochaeta sp. DS3sAY3a
2	497	Uncharacterized protein	LXJU01000135	PENARI_c135G11868	A0A1F5L0F0	GI:1083152110|EMBL-CDS:OGE46693.1	#0000FF	Penicillium arizonense.	A0A1F5L0F0	284	A0A1F5L0F0	Penicillium arizonense
2	497	Uncharacterized protein	LT882676	ZT1A5_G1719	A0A1Y6L708	EMBL-CDS:SMY20284.1	#0000FF	Zymoseptoria tritici ST99CH_1A5.	A0A1Y6L708	418	A0A1Y6L708	Zymoseptoria tritici ST99CH_1A5
2	497	Uncharacterized protein	KB445575	COCHEDRAFT_1021112	M2THY3	GI:451999793|GI:451993647|EMBL-CDS:EMD86119.1|EMBL-CDS:EMD92255.1	#0000FF	Cochliobolus heterostrophus (strain C5 / ATCC 48332 / race O)	M2THY3	412	M2THY3	Bipolaris maydis C5
2	497	Uncharacterized protein	LCTW02000119	MMYC01_205582	A0A175W479	GI:1003742686|EMBL-CDS:KXX78473.1	#0000FF	Madurella mycetomatis.	A0A175W479	271	A0A175W479	Madurella mycetomatis
2	497	Uncharacterized protein	KB733448	COCC4DRAFT_30612	N4XS06	GI:928526118|GI:477590874|EMBL-CDS:ENI07947.1|REFSEQ:XP_014081856.1	#0000FF	Cochliobolus heterostrophus (strain C4 / ATCC 48331 / race T)	N4XS06	412	N4XS06	Bipolaris maydis ATCC 48331
2	497	Uncharacterized protein	AMGW01000003	A1O7_04758	W9W6I2	GI:628291777|GI:589977321|EMBL-CDS:EXJ60605.1|REFSEQ:XP_007756958.1	#0000FF	Cladophialophora yegresii CBS 114405.	W9W6I2	457	W9W6I2	Cladophialophora yegresii CBS 114405
2	497	Uncharacterized protein	KZ107857	B5807_10803	A0A1Y2LMJ5	GI:1188275519|EMBL-CDS:OSS44407.1	#0000FF	Epicoccum nigrum	A0A1Y2LMJ5	428	A0A1Y2LMJ5	Epicoccum nigrum
2	497	Uncharacterized protein	LT854273	ZT3D1_G1704	A0A2H1FUW7	EMBL-CDS:SMR45121.1	#0000FF	Zymoseptoria tritici ST99CH_3D1.	A0A2H1FUW7	352	A0A2H1FUW7	Zymoseptoria tritici ST99CH_3D1
2	497	Putative dna-directed rna polymerase protein	KB916791	UCRNP2_9466	R1G6R9	GI:615427645|GI:485916497|EMBL-CDS:EOD43831.1|REFSEQ:XP_007588705.1	#0000FF	Botryosphaeria parva (strain UCR-NP2)	R1G6R9	361	R1G6R9	Neofusicoccum parvum UCRNP2
2	497	Chitin binding domain-containing protein	KB644415	PDE_09441	S8BH68	GI:525588227|EMBL-CDS:EPS34477.1	#0000FF	Penicillium oxalicum (strain 114-2 / CGMCC 5302)	S8BH68	402	S8BH68	Penicillium oxalicum 114-2
2	497	Uncharacterized protein	MOOB01000119	PENNAL_c0119G02017	A0A1V6X544	GI:1168172506|EMBL-CDS:OQE70216.1	#0000FF	Penicillium nalgiovense.	A0A1V6X544	262	A0A1V6X544	Penicillium nalgiovense
2	497	Uncharacterized protein	DS231629	PTRG_11032	B2WM22	GI:189210062|GI:187977456|EMBL-CDS:EDU44082.1|REFSEQ:XP_001941363.1	#0000FF	Pyrenophora tritici-repentis (strain Pt-1C-BFP)	B2WM22	456	B2WM22	Pyrenophora tritici-repentis Pt-1C-BFP
2	497	Uncharacterized protein	KV455016	VE03_06281	A0A1B8DYC0	GI:1040527071|EMBL-CDS:OBT64131.1	#0000FF	Pseudogymnoascus sp. 23342-1-I1.	A0A1B8DYC0	384	A0A1B8DYC0	Pseudogymnoascus sp. 23342-1-I1
2	497	Uncharacterized protein	LXJU01000248	PENARI_c248G02190	A0A1F5KZN1	GI:1083151762|EMBL-CDS:OGE46458.1	#0000FF	Penicillium arizonense.	A0A1F5KZN1	284	A0A1F5KZN1	Penicillium arizonense
2	497	Uncharacterized protein	KZ107850	B5807_08989	A0A1Y2LTH8	GI:1188278014|EMBL-CDS:OSS46902.1	#0000FF	Epicoccum nigrum	A0A1Y2LTH8	420	A0A1Y2LTH8	Epicoccum nigrum
2	497	Uncharacterized protein	PDNA01000118	AJ80_06729	A0A2B7XUX4	EMBL-CDS:PGH12422.1	#0000FF	Polytolypa hystricis UAMH7299.	A0A2B7XUX4	456	A0A2B7XUX4	Polytolypa hystricis UAMH7299
2	497	Uncharacterized protein	KB822704	G647_03917	V9DDZ3	GI:671172036|GI:565935319|EMBL-CDS:ETI24548.1|REFSEQ:XP_008726484.1	#0000FF	Cladophialophora carrionii CBS 160.54.	V9DDZ3	456	V9DDZ3	Cladophialophora carrionii CBS 160.54
2	497	Uncharacterized protein	KN846958	PV04_04492	A0A0D2FKC3	GI:759292137|EMBL-CDS:KIW68553.1	#0000FF	Phialophora americana.	A0A0D2FKC3	414	A0A0D2FKC3	Phialophora americana
2	497	Uncharacterized protein	JPJV01000759	V493_01983	A0A094B4S5	GI:682331142|EMBL-CDS:KFY30335.1	#0000FF	Pseudogymnoascus sp. VKM F-4281	A0A094B4S5	398	A0A094B4S5	Pseudogymnoascus sp. VKM F-4281 (FW-2241)
2	497	Uncharacterized protein	GL538174	PTT_20365	E3SAY9	GI:330948040|GI:311315162|EMBL-CDS:EFQ84871.1|REFSEQ:XP_003307044.1	#0000FF	Pyrenophora teres f. teres (strain 0-1)	E3SAY9	493	E3SAY9	Pyrenophora teres f. teres 0-1
2	497	Predicted protein	FP929094	LEMA_P055860	E4ZML1	GI:396463268|GI:312212797|EMBL-CDS:CBX92880.1|REFSEQ:XP_003836245.1	#0000FF	Leptosphaeria maculans (strain JN3 / isolate v23.1.3 / raceAv1-4-5-6-7-8)	E4ZML1	380	E4ZML1	Leptosphaeria maculans JN3
2	497	Uncharacterized protein	KK088413	EURHEDRAFT_408887	A0A017SQN3	GI:599159524|EMBL-CDS:EYE98545.1	#0000FF	Aspergillus ruber CBS 135680.	A0A017SQN3	418	A0A017SQN3	Aspergillus ruber CBS 135680
2	497	Lytic polysaccharide monooxygenase	LGLR01000402	TW65_08908	A0A0L1HCS2	GI:909986576|EMBL-CDS:KNG44234.1	#0000FF	Stemphylium lycopersici.	A0A0L1HCS2	401	A0A0L1HCS2	Stemphylium lycopersici
2	497	Uncharacterized protein	KV441549	CC84DRAFT_1161434	A0A177CUR6	GI:1027150052|GI:1066276805|EMBL-CDS:OAG10499.1|REFSEQ:XP_018040864.1	#0000FF	Paraphaeosphaeria sporulosa.	A0A177CUR6	366	A0A177CUR6	Paraphaeosphaeria sporulosa
2	497	Glycoside hydrolase	LFIV01000130	CT0861_12827	A0A166QKR4	GI:1020432015|EMBL-CDS:KZL68056.1	#0000FF	Colletotrichum tofieldiae.	A0A166QKR4	414	A0A166QKR4	Colletotrichum tofieldiae
2	497	Lytic polysaccharide monooxygenase	KI963997	COCMIDRAFT_5928	W6Z4X1	GI:576931228|GI:627836882|EMBL-CDS:EUC44793.1|REFSEQ:XP_007688665.1	#0000FF	Bipolaris oryzae ATCC 44560.	W6Z4X1	418	W6Z4X1	Bipolaris oryzae ATCC 44560
2	497	Uncharacterized protein	KV878900	ASPGLDRAFT_48592	A0A1L9VH31	GI:1111923730|EMBL-CDS:OJJ83203.1	#0000FF	Aspergillus glaucus CBS 516.65.	A0A1L9VH31	418	A0A1L9VH31	Aspergillus glaucus CBS 516.65
2	497	Uncharacterized protein	MCFA01000001	BCR34DRAFT_471561	A0A1Y2ABI7	GI:1183394859|EMBL-CDS:ORY19854.1	#0000FF	Clohesyomyces aquaticus.	A0A1Y2ABI7	329	A0A1Y2ABI7	Clohesyomyces aquaticus
2	497	Uncharacterized protein	KZ107853	B5807_09682	A0A1Y2LQW9	GI:1188276699|EMBL-CDS:OSS45587.1	#0000FF	Epicoccum nigrum	A0A1Y2LQW9	332	A0A1Y2LQW9	Epicoccum nigrum
2	497	Uncharacterized protein	MVDW01000093	BST61_czeina93g000300	A0A2I0RLJ5	EMBL-CDS:PKR96433.1	#0000FF	Cercospora zeina.	A0A2I0RLJ5	425	A0A2I0RLJ5	Cercospora zeina
2	497	Related to spore coat protein SP96	FJOG01000073	PAC_19451	A0A1L7XWW6	EMBL-CDS:CZR69551.1	#0000FF	Phialocephala subalpina.	A0A1L7XWW6	425	A0A1L7XWW6	Phialocephala subalpina
2	497	Uncharacterized protein	KV441553	CC84DRAFT_801286	A0A177CDG0	GI:1027144289|GI:1066286601|EMBL-CDS:OAG04740.1|REFSEQ:XP_018035105.1	#0000FF	Paraphaeosphaeria sporulosa.	A0A177CDG0	408	A0A177CDG0	Paraphaeosphaeria sporulosa
2	497	Uncharacterized protein	LGRB01000008	CLCR_10210	A0A1C1CVI6	GI:1050187889|EMBL-CDS:OCT52520.1	#0000FF	Cladophialophora carrionii.	A0A1C1CVI6	456	A0A1C1CVI6	Cladophialophora carrionii
2	497	Uncharacterized protein	LXJU01000154	PENARI_c154G09697	A0A1F5L093	GI:1083152041|EMBL-CDS:OGE46643.1	#0000FF	Penicillium arizonense.	A0A1F5L093	284	A0A1F5L093	Penicillium arizonense
2	497	Str. FM013	HG793312	PCAMFM013_S3Jg000039	A0A0G4PY73	GI:902265140|EMBL-CDS:CRL31428.1	#0000FF	Penicillium camemberti FM 013.	A0A0G4PY73	274	A0A0G4PY73	Penicillium camemberti FM 013
2	497	Uncharacterized protein	LFZO01000001	AC579_8729	A0A139IW87	GI:1002224156|EMBL-CDS:KXT19005.1	#0000FF	Pseudocercospora musae.	A0A139IW87	409	A0A139IW87	Pseudocercospora musae
2	497	Viral capsid	JYNV01000004	ST47_g165	A0A163MGI6	GI:1020709021|EMBL-CDS:KZM28696.1	#0000FF	Didymella rabiei	A0A163MGI6	414	A0A163MGI6	Ascochyta rabiei
2	497	Glycoside hydrolase	KB725930	Cob_09157	N4VK12	GI:477531005|EMBL-CDS:ENH82730.1	#0000FF	Colletotrichum orbiculare (strain 104-T / ATCC 96160 / CBS 514.97 /LARS 414 / MAFF 240422)	N4VK12	422	N4VK12	Colletotrichum orbiculare MAFF 240422
2	497	Pc17g00010 protein	AM920432	Pc17g00010	B6HAT8	GI:255952432|GI:211586472|EMBL-CDS:CAP79288.1|REFSEQ:XP_002566969.1	#0000FF	Penicillium rubens (strain ATCC 28089 / DSM 1075 / NRRL 1951 /Wisconsin 54-1255)	B6HAT8	274	B6HAT8	Penicillium rubens Wisconsin 54-1255
2	497	Uncharacterized protein	EQ999976	BDCG_04446	C5GI60	GI:239612339|EMBL-CDS:EEQ89326.1	#0000FF	Ajellomyces dermatitidis (strain ER-3 / ATCC MYA-2586)	C5GI60	311	C5GI60	Blastomyces dermatitidis ER-3
2	497	Uncharacterized protein	CH445325	SNOG_00622	Q0V5U2	GI:111070997|GI:169595758|EMBL-CDS:EAT92117.1|REFSEQ:XP_001791303.1	#0000FF	Phaeosphaeria nodorum (strain SN15 / ATCC MYA-4574 / FGSC 10173)	Q0V5U2	407	Q0V5U2	Parastagonospora nodorum SN15
2	497	Uncharacterized protein	MLQL01000139	PENFLA_c139G01270	A0A1V6S3W2	GI:1168108421|EMBL-CDS:OQE08419.1	#0000FF	Penicillium flavigenum.	A0A1V6S3W2	274	A0A1V6S3W2	Penicillium flavigenum
2	497	Pc09g00200 protein	AM920424	Pc09g00200	B6GWL6	GI:211581502|GI:255930656|EMBL-CDS:CAP79267.1|REFSEQ:XP_002556886.1	#0000FF	Penicillium rubens (strain ATCC 28089 / DSM 1075 / NRRL 1951 /Wisconsin 54-1255)	B6GWL6	274	B6GWL6	Penicillium rubens Wisconsin 54-1255
2	497	Uncharacterized protein	LXJU01000182	PENARI_c182G08739	A0A1F5L0L9	GI:1083151947|EMBL-CDS:OGE46577.1	#0000FF	Penicillium arizonense.	A0A1F5L0L9	260	A0A1F5L0L9	Penicillium arizonense
2	497	Uncharacterized protein	KN832878	OIDMADRAFT_181089	A0A0C3DCK6	GI:751751482|EMBL-CDS:KIM99662.1	#0000FF	Oidiodendron maius Zn.	A0A0C3DCK6	404	A0A0C3DCK6	Oidiodendron maius Zn
2	497	Uncharacterized protein	LKMD01000100	CB0940_00582	A0A2G5I794	EMBL-CDS:PIB00678.1	#0000FF	Cercospora beticola	A0A2G5I794	419	A0A2G5I794	Cercospora beticola
2	497	Str. FM013	HG793181	PCAMFM013_S048g000056	A0A0G4PW21	GI:902266240|EMBL-CDS:CRL30344.1	#0000FF	Penicillium camemberti FM 013.	A0A0G4PW21	276	A0A0G4PW21	Penicillium camemberti FM 013
2	497	Uncharacterized protein	JYNV01000209	ST47_g6067	A0A163CY46	GI:1020702291|EMBL-CDS:KZM22775.1	#0000FF	Didymella rabiei	A0A163CY46	330	A0A163CY46	Ascochyta rabiei
2	497	Chitin-binding| domain 3	AZHD01000001	SPI_00846	A0A168AEY8	GI:1025681345|EMBL-CDS:OAA68651.1	#0000FF	Sporothrix insectorum RCEF 264.	A0A168AEY8	426	A0A168AEY8	Sporothrix insectorum RCEF 264
2	497	Uncharacterized protein	KV441707	IQ06DRAFT_97653	A0A178B534	GI:1028902209|EMBL-CDS:OAL04459.1	#0000FF	Stagonospora sp. SRC1lsM3a.	A0A178B534	407	A0A178B534	Stagonospora sp. SRC1lsM3a
2	497	Uncharacterized protein	CM001196	MYCGRDRAFT_32157	F9WYE4	GI:398410567|GI:339476517|EMBL-CDS:EGP91608.1|REFSEQ:XP_003856632.1	#0000FF	Zymoseptoria tritici (strain CBS 115943 / IPO323)	F9WYE4	208	F9WYE4	Zymoseptoria tritici IPO323
2	497	Uncharacterized protein	KB456260	SEPMUDRAFT_35015	N1QMR8	GI:1030127823|GI:453089617|EMBL-CDS:EMF17657.1|REFSEQ:XP_016765778.1	#0000FF	Sphaerulina musiva (strain SO2202)	N1QMR8	207	N1QMR8	Sphaerulina musiva SO2202
2	497	Uncharacterized protein	KB445641	COCSADRAFT_189304	M2ST98	GI:451852215|GI:628067969|EMBL-CDS:EMD65510.1|REFSEQ:XP_007698638.1	#0000FF	Cochliobolus sativus (strain ND90Pr / ATCC 201652)	M2ST98	430	M2ST98	Bipolaris sorokiniana ND90Pr
2	497	Putative chitin-domain 3 protein	KB933264	UCRPA7_6921	R8BEE3	GI:631245451|GI:500254032|EMBL-CDS:EON97679.1|REFSEQ:XP_007917647.1	#0000FF	Togninia minima (strain UCR-PA7)	R8BEE3	395	R8BEE3	Phaeoacremonium minimum UCRPA7
2	497	Uncharacterized protein	GG697346	GLRG_05009	E3QG30	GI:310794404|GI:827064705|EMBL-CDS:EFQ29865.1|REFSEQ:XP_008093885.1	#0000FF	Colletotrichum graminicola (strain M1.001 / M2 / FGSC 10212)	E3QG30	404	E3QG30	Colletotrichum graminicola M1.001
2	497	Lytic polysaccharide monooxygenase	KI968698	COCVIDRAFT_87444	W7ELZ1	GI:578494100|GI:953438067|EMBL-CDS:EUN31488.1|REFSEQ:XP_014561105.1	#0000FF	Bipolaris victoriae FI3.	W7ELZ1	425	W7ELZ1	Bipolaris victoriae FI3
2	497	Uncharacterized protein	CM002798	EN45_043280	A0A167YHT8	GI:1021546893|EMBL-CDS:KZN94139.1	#0000FF	Penicillium chrysogenum	A0A167YHT8	251	A0A167YHT8	Penicillium chrysogenum
2	497	Uncharacterized protein	CM002799	EN45_061710	A0A167SW75	GI:1021540306|EMBL-CDS:KZN87610.1	#0000FF	Penicillium chrysogenum	A0A167SW75	251	A0A167SW75	Penicillium chrysogenum
2	497	Uncharacterized protein	CM002799	EN45_064620	A0A167T5F5	GI:1021540597|EMBL-CDS:KZN87901.1	#0000FF	Penicillium chrysogenum	A0A167T5F5	251	A0A167T5F5	Penicillium chrysogenum
2	497	Uncharacterized protein	CM002798	EN45_041730	A0A167YDM3	GI:1021546739|EMBL-CDS:KZN93985.1	#0000FF	Penicillium chrysogenum	A0A167YDM3	251	A0A167YDM3	Penicillium chrysogenum
2	497	Uncharacterized protein	MLQL01000157	PENFLA_c157G07507	A0A1V6S1X4	GI:1168107590|EMBL-CDS:OQE07633.1	#0000FF	Penicillium flavigenum.	A0A1V6S1X4	251	A0A1V6S1X4	Penicillium flavigenum
2	497	Pc23g00050 protein	AM920438	Pc23g00050	B6HW64	GI:255951617|GI:211904196|EMBL-CDS:CAP79499.1|REFSEQ:XP_002566575.1	#0000FF	Penicillium rubens (strain ATCC 28089 / DSM 1075 / NRRL 1951 /Wisconsin 54-1255)	B6HW64	244	B6HW64	Penicillium rubens Wisconsin 54-1255
2	497	Glycoside hydrolase	KE148158	F503_00176	S3BWV0	GI:512189254|EMBL-CDS:EPE05022.1	#0000FF	Ophiostoma piceae (strain UAMH 11346)	S3BWV0	281	S3BWV0	Ophiostoma piceae UAMH 11346
2	497	Uncharacterized protein	KB445641	COCSADRAFT_355596	M2TB08	GI:451852757|GI:628068769|EMBL-CDS:EMD66052.1|REFSEQ:XP_007699038.1	#0000FF	Cochliobolus sativus (strain ND90Pr / ATCC 201652)	M2TB08	353	M2TB08	Bipolaris sorokiniana ND90Pr
2	497	Lytic polysaccharide monooxygenase	KI964540	COCCADRAFT_32142	W6Z519	GI:576924668|GI:628183714|EMBL-CDS:EUC38776.1|REFSEQ:XP_007706876.1	#0000FF	Bipolaris zeicola 26-R-13.	W6Z519	429	W6Z519	Bipolaris zeicola 26-R-13
2	497	Uncharacterized protein	CM002798	EN45_042480	A0A167YFL4	GI:1021546814|EMBL-CDS:KZN94060.1	#0000FF	Penicillium chrysogenum	A0A167YFL4	216	A0A167YFL4	Penicillium chrysogenum
2	497	Uncharacterized protein	KB908866	SETTUDRAFT_165829	R0JUZ9	GI:482804222|GI:636598991|EMBL-CDS:EOA81334.1|REFSEQ:XP_008030834.1	#0000FF	Setosphaeria turcica (strain 28A)	R0JUZ9	433	R0JUZ9	Exserohilum turcica Et28A
2	497	Uncharacterized protein	MLQL01000171	PENFLA_c171G00197	A0A1V6S020	GI:1168107312|EMBL-CDS:OQE07387.1	#0000FF	Penicillium flavigenum.	A0A1V6S020	210	A0A1V6S020	Penicillium flavigenum
2	497	Endoglucanase	JARH01001048	CFIO01_02495	A0A010QAG4	GI:615476306|GI:588891105|EMBL-CDS:EXF73725.1|REFSEQ:XP_007602693.1	#0000FF	Colletotrichum fioriniae PJ7.	A0A010QAG4	399	A0A010QAG4	Colletotrichum fioriniae PJ7
2	497	Lytic polysaccharide monooxygenase	JPDO01000064	M433DRAFT_62227	A0A150VBG5	GI:1005706882|EMBL-CDS:KYG47857.1	#0000FF	Acidomyces richmondensis BFW.	A0A150VBG5	207	A0A150VBG5	Acidomyces richmondensis BFW
2	497	Uncharacterized protein	CM002798	EN45_002330	A0A167V7W2	GI:1021542876|EMBL-CDS:KZN90122.1	#0000FF	Penicillium chrysogenum	A0A167V7W2	251	A0A167V7W2	Penicillium chrysogenum
2	497	Uncharacterized protein	AM944492	None	B5WYE8	GI:209570444|EMBL-CDS:CAQ16288.1	#0000FF	Colletotrichum graminicola	B5WYE8	325	B5WYE8	Colletotrichum graminicola
2	497	Uncharacterized protein	MUNK01000263	BTJ68_13259	A0A1Z5STF1	GI:1190778248|EMBL-CDS:OTA24038.1	#0000FF	Hortaea werneckii EXF-2000.	A0A1Z5STF1	663	A0A1Z5STF1	Hortaea werneckii EXF-2000
2	497	Endoglucanase	LTAN01000003	CH063_03636	H1VZ95	GI:1069490794|GI:1039273619|EMBL-CDS:CCF45557.1|EMBL-CDS:OBR11888.1|REFSEQ:XP_018160405.1	#0000FF	Colletotrichum higginsianum (strain IMI 349063)	H1VZ95	416	H1VZ95	Colletotrichum higginsianum IMI 349063
2	497	Uncharacterized protein	KL585004	M438DRAFT_349518	A0A074X2G1	GI:662522186|EMBL-CDS:KEQ79588.1	#0000FF	Aureobasidium pullulans EXF-150.	A0A074X2G1	419	A0A074X2G1	Aureobasidium pullulans EXF-150
2	497	Uncharacterized protein	FJUY01000014	RCC_08569	A0A2D3V4F7	EMBL-CDS:CZT22863.1	#0000FF	Ramularia collo-cygni.	A0A2D3V4F7	440	A0A2D3V4F7	Ramularia collo-cygni
2	497	Pc22g26710 protein	AM920437	Pc22g26710	B6HUA8	GI:255951540|GI:211593554|EMBL-CDS:CAP99959.1|REFSEQ:XP_002566537.1	#0000FF	Penicillium rubens (strain ATCC 28089 / DSM 1075 / NRRL 1951 /Wisconsin 54-1255)	B6HUA8	251	B6HUA8	Penicillium rubens Wisconsin 54-1255
2	497	Uncharacterized protein	DS985217	VDBG_04115	C9SFR1	GI:302416661|GI:261355578|EMBL-CDS:EEY18006.1|REFSEQ:XP_003006162.1	#0000FF	Verticillium alfalfae (strain VaMs.102 / ATCC MYA-4576 / FGSC 10136)	C9SFR1	418	C9SFR1	Verticillium alfalfae VaMs.102
2	497	Uncharacterized protein	KB445578	COCHEDRAFT_1178048	M2UPT1	GI:451997463|EMBL-CDS:EMD89928.1	#0000FF	Cochliobolus heterostrophus (strain C5 / ATCC 48332 / race O)	M2UPT1	349	M2UPT1	Bipolaris maydis C5
2	497	Uncharacterized protein	KB733445	COCC4DRAFT_185311	N4XDP1	GI:477592790|GI:928529944|EMBL-CDS:ENI09860.1|REFSEQ:XP_014083769.1	#0000FF	Cochliobolus heterostrophus (strain C4 / ATCC 48331 / race T)	N4XDP1	349	N4XDP1	Bipolaris maydis ATCC 48331
2	497	Uncharacterized protein	LVWM01000192	AUREO_031170	A0A1A7MK73	GI:1041761975|EMBL-CDS:OBW66811.1	#0000FF	Aureobasidium pullulans	A0A1A7MK73	419	A0A1A7MK73	Aureobasidium pullulans
2	497	Genomic scaffold| ProqFM164S02	HG792016	PROQFM164_S02g002838	W6QT35	GI:584413911|EMBL-CDS:CDM32687.1	#0000FF	Penicillium roqueforti (strain FM164)	W6QT35	251	W6QT35	Penicillium roqueforti FM164
2	497	Podospora anserina S mat+ genomic DNA chromosome 2| supercontig 2	CU640366	PODANS_2_8610	B2B6R6	GI:171693483|GI:681095765|GI:170946690|EMBL-CDS:CAP73493.1|EMBL-CDS:CDP25894.1|REFSEQ:XP_001911666.1	#0000FF	Podospora anserina (strain S / ATCC MYA-4624 / DSM 980 / FGSC 10383)	B2B6R6	248	B2B6R6	Podospora anserina S mat+
2	497	Uncharacterized protein	FP929123	LEMA_P119660	E4ZT44	GI:312214484|GI:396467368|EMBL-CDS:CBX94475.1|REFSEQ:XP_003837919.1	#0000FF	Leptosphaeria maculans (strain JN3 / isolate v23.1.3 / raceAv1-4-5-6-7-8)	E4ZT44	326	E4ZT44	Leptosphaeria maculans JN3
2	497	Uncharacterized protein	MUNK01000357	BTJ68_13784	A0A1Z5SPG7	GI:1190776472|EMBL-CDS:OTA22607.1	#0000FF	Hortaea werneckii EXF-2000.	A0A1Z5SPG7	475	A0A1Z5SPG7	Hortaea werneckii EXF-2000
2	497	Putative chitindomain 3	LCUC01000364	UCDDA912_g08310	A0A0G2HUG2	GI:821078037|EMBL-CDS:KKY31720.1	#0000FF	Diaporthe ampelina.	A0A0G2HUG2	396	A0A0G2HUG2	Diaporthe ampelina
2	497	Uncharacterized protein	KL584712	M436DRAFT_49674	A0A074WFT9	GI:662514387|GI:918808345|EMBL-CDS:KEQ71955.1|REFSEQ:XP_013426240.1	#0000FF	Aureobasidium namibiae CBS 147.97.	A0A074WFT9	348	A0A074WFT9	Aureobasidium namibiae CBS 147.97
2	497	Uncharacterized protein	KZ111540	M426DRAFT_72629	A0A1Y2W7K3	GI:1190916642|EMBL-CDS:OTB05772.1	#0000FF	Hypoxylon sp. CI-4A.	A0A1Y2W7K3	397	A0A1Y2W7K3	Hypoxylon sp. CI-4A
2	497	Pc20g12880 protein	AM920435	Pc20g12880	B6HGM9	GI:211588508|GI:255946011|EMBL-CDS:CAP86617.1|REFSEQ:XP_002563773.1	#0000FF	Penicillium rubens (strain ATCC 28089 / DSM 1075 / NRRL 1951 /Wisconsin 54-1255)	B6HGM9	279	B6HGM9	Penicillium rubens Wisconsin 54-1255
2	497	Uncharacterized protein	CH445342	SNOG_11232	Q0UAI2	GI:169616117|GI:160703117|EMBL-CDS:EAT81731.2|REFSEQ:XP_001801474.1	#0000FF	Phaeosphaeria nodorum (strain SN15 / ATCC MYA-4574 / FGSC 10173)	Q0UAI2	459	Q0UAI2	Parastagonospora nodorum SN15
2	497	Uncharacterized protein	CP003003	MYCTH_2301079	G2Q8W8	GI:367024547|GI:347008826|EMBL-CDS:AEO56313.1|REFSEQ:XP_003661558.1	#0000FF	Myceliophthora thermophila (strain ATCC 42464 / BCRC 31852 / DSM 1799)	G2Q8W8	278	G2Q8W8	Thermothelomyces thermophila ATCC 42464
2	497	Uncharacterized protein	KV875097	CONLIGDRAFT_681150	A0A1J7ISS1	GI:1102747888|EMBL-CDS:OIW30381.1	#0000FF	Coniochaeta ligniaria NRRL 30616.	A0A1J7ISS1	409	A0A1J7ISS1	Coniochaeta ligniaria NRRL 30616
2	497	Uncharacterized protein	CVQH01023305	BN1708_006560	A0A0G4ML76	EMBL-CDS:CRK34924.1|EMBL-CDS:CRK35905.1	#0000FF	Verticillium longisporum.	A0A0G4ML76	418	A0A0G4ML76	Verticillium longisporum
2	497	Uncharacterized protein	KL584750	AUEXF2481DRAFT_25442	A0A074YPC4	GI:915705216|GI:662542247|EMBL-CDS:KEQ99545.1|REFSEQ:XP_013348007.1	#0000FF	Aureobasidium subglaciale EXF-2481.	A0A074YPC4	420	A0A074YPC4	Aureobasidium subglaciale EXF-2481
2	497	Uncharacterized protein	KQ947444	LY89DRAFT_536991	A0A132B2X4	GI:972530095|GI:1069198552|EMBL-CDS:KUJ06746.1|REFSEQ:XP_018061101.1	#0000FF	Phialocephala scopiformis.	A0A132B2X4	389	A0A132B2X4	Phialocephala scopiformis
2	497	Lytic polysaccharide monooxygenase	KZ111251	K449DRAFT_434921	A0A1Y2TS56	GI:1190869090|EMBL-CDS:OTA61165.1	#0000FF	Hypoxylon sp. EC38.	A0A1Y2TS56	408	A0A1Y2TS56	Hypoxylon sp. EC38
2	497	Uncharacterized protein	KZ112486	M434DRAFT_31984	A0A1Y2V7A9	GI:1190902207|EMBL-CDS:OTA92317.1	#0000FF	Hypoxylon sp. CO27-5.	A0A1Y2V7A9	399	A0A1Y2V7A9	Hypoxylon sp. CO27-5
2	497	Uncharacterized protein	PHNV01000138	VD0003_g5066	A0A2J8DSI6	EMBL-CDS:PNH52232.1	#0000FF	Verticillium dahliae	A0A2J8DSI6	418	A0A2J8DSI6	Verticillium dahliae
2	497	Uncharacterized protein	DS572696	VDAG_01339	G2WU66	GI:697066667|GI:346974205|EMBL-CDS:EGY17657.1|REFSEQ:XP_009648520.1	#0000FF	Verticillium dahliae (strain VdLs.17 / ATCC MYA-4575 / FGSC 10137)	G2WU66	418	G2WU66	Verticillium dahliae VdLs.17
2	497	Uncharacterized protein	GG698900	NECHADRAFT_96270	C7YUA6	GI:256731419|GI:302911391|EMBL-CDS:EEU44769.1|REFSEQ:XP_003050482.1	#0000FF	Nectria haematococca (strain 77-13-4 / ATCC MYA-4622 / FGSC 9596 /MPVI)	C7YUA6	358	C7YUA6	[Nectria] haematococca mpVI 77-13-4
2	497	Uncharacterized protein	CM002799	EN45_064060	A0A167T3G3	GI:1021540541|EMBL-CDS:KZN87845.1	#0000FF	Penicillium chrysogenum	A0A167T3G3	162	A0A167T3G3	Penicillium chrysogenum
2	497	Uncharacterized protein	LXJU01000293	PENARI_c293G05879	A0A1F5L022	GI:1083151665|EMBL-CDS:OGE46406.1	#0000FF	Penicillium arizonense.	A0A1F5L022	230	A0A1F5L022	Penicillium arizonense
2	497	Uncharacterized protein	KV842044	CSPAE12_06734	A0A1S1VQJ0	GI:1093042382|EMBL-CDS:OHW94645.1	#0000FF	Colletotrichum incanum.	A0A1S1VQJ0	410	A0A1S1VQJ0	Colletotrichum incanum
2	497	Related to spore coat protein SP96	CAGA01000005	CPUR_01250	M1VZ28	EMBL-CDS:CCE27776.1	#0000FF	Claviceps purpurea (strain 20.1)	M1VZ28	420	M1VZ28	Claviceps purpurea 20.1
2	497	Related to spore coat protein SP96	FJVC01000385	RSE6_10438	A0A1E1MKG9	EMBL-CDS:CZT49570.1	#0000FF	Rhynchosporium secalis	A0A1E1MKG9	427	A0A1E1MKG9	Rhynchosporium secalis
2	497	Uncharacterized protein	LXJU01000221	PENARI_c221G03324	A0A1F5L015	GI:1083151835|EMBL-CDS:OGE46504.1	#0000FF	Penicillium arizonense.	A0A1F5L015	240	A0A1F5L015	Penicillium arizonense
2	497	Uncharacterized protein	GL385403	GGTG_12552	J3PGC7	GI:402074139|GI:685419723|EMBL-CDS:EJT69668.1|REFSEQ:XP_009228716.1	#0000FF	Gaeumannomyces graminis var. tritici (strain R3-111a-1)	J3PGC7	442	J3PGC7	Gaeumannomyces tritici R3-111a-1
2	497	Uncharacterized protein	JMSE01000515	CSUB01_03973	A0A066XKE9	GI:640925525|EMBL-CDS:KDN69407.1	#0000FF	Colletotrichum sublineola	A0A066XKE9	401	A0A066XKE9	Colletotrichum sublineola
2	497	Uncharacterized protein	KN714666	VP1G_00197	A0A194ULZ1	GI:972123714|EMBL-CDS:KUI52673.1	#0000FF	Valsa mali var. pyri.	A0A194ULZ1	397	A0A194ULZ1	Valsa mali var. pyri
2	497	Uncharacterized protein	CDHN01000001	VHEMI01005	A0A0A1T427	EMBL-CDS:CEJ80845.1	#0000FF	Torrubiella hemipterigena.	A0A0A1T427	388	A0A0A1T427	Torrubiella hemipterigena
2	497	Related to spore coat protein SP96	FJUX01000017	RAG0_04188	A0A1E1K826	EMBL-CDS:CZS94141.1	#0000FF	Rhynchosporium agropyri.	A0A1E1K826	432	A0A1E1K826	Rhynchosporium agropyri
2	497	Related to spore coat protein SP96	FJUW01000017	RCO7_07937	A0A1E1KNM2	EMBL-CDS:CZS99628.1	#0000FF	Rhynchosporium commune.	A0A1E1KNM2	427	A0A1E1KNM2	Rhynchosporium commune
2	497	Uncharacterized protein	MAVT02000480	DHEL01_v206116	A0A2P5HZ04	EMBL-CDS:POS75488.1	#0000FF	Diaporthe helianthi.	A0A2P5HZ04	406	A0A2P5HZ04	Diaporthe helianthi
2	497	Uncharacterized protein	JH650972	FOVG_07460	W9PGG7	GI:587744395|EMBL-CDS:EXA42111.1	#0000FF	Fusarium oxysporum f. sp. pisi HDV247.	W9PGG7	406	W9PGG7	Fusarium oxysporum f. sp. pisi HDV247
2	497	Uncharacterized protein	MCFA01000242	BCR34DRAFT_497237	A0A1Y1YGF4	GI:1183371221|EMBL-CDS:ORX97065.1	#0000FF	Clohesyomyces aquaticus.	A0A1Y1YGF4	313	A0A1Y1YGF4	Clohesyomyces aquaticus
2	497	Glycoside hydrolase	JHTR01000001	UV8b_149	A0A063CBT3	GI:632919369|EMBL-CDS:KDB18758.1	#0000FF	Ustilaginoidea virens.	A0A063CBT3	434	A0A063CBT3	Ustilaginoidea virens
2	497	Chitin-binding| domain 3	LAYC01000001	DCS_02642	A0A151GWQ0	GI:1008938516|EMBL-CDS:KYK61500.1	#0000FF	Drechmeria coniospora.	A0A151GWQ0	363	A0A151GWQ0	Drechmeria coniospora
2	497	Uncharacterized protein	CM002798	EN45_002070	A0A167V7B3	GI:1021542850|EMBL-CDS:KZN90096.1	#0000FF	Penicillium chrysogenum	A0A167V7B3	233	A0A167V7B3	Penicillium chrysogenum
2	497	Endoglucanase	LSBJ02000005	VFPPC_06028	A0A179FHD0	GI:1032858010|GI:1069532157|EMBL-CDS:OAQ64807.1|REFSEQ:XP_018142121.1	#0000FF	Pochonia chlamydosporia 170.	A0A179FHD0	411	A0A179FHD0	Pochonia chlamydosporia 170
2	497	Uncharacterized protein	KV459383	VE02_03941	A0A1B8FYC5	GI:1040552971|EMBL-CDS:OBT88594.1	#0000FF	Pseudogymnoascus sp. 03VT05.	A0A1B8FYC5	410	A0A1B8FYC5	Pseudogymnoascus sp. 03VT05
2	497	Lytic polysaccharide monooxygenase	KZ613838	K444DRAFT_644251	A0A2J6T4N8	EMBL-CDS:PMD57985.1	#0000FF	Meliniomyces bicolor E.	A0A2J6T4N8	429	A0A2J6T4N8	Meliniomyces bicolor E
2	497	Putative chitin-domain 3 protein	KB706009	UCREL1_3154	M7TT24	GI:471570814|GI:629649872|EMBL-CDS:EMR69820.1|REFSEQ:XP_007791086.1	#0000FF	Eutypa lata (strain UCR-EL1)	M7TT24	366	M7TT24	Eutypa lata UCREL1
2	497	Related to spore coat protein SP96	HF679026	FFUJ_13282	S0DX13	GI:517315121|EMBL-CDS:CCT67099.1	#0000FF	Gibberella fujikuroi (strain CBS 195.34 / IMI 58289 / NRRL A-6831)	S0DX13	404	S0DX13	Fusarium fujikuroi IMI 58289
2	497	Uncharacterized protein	BBTG02000004	UVI_02011140	A0A1B5L0I1	EMBL-CDS:GAO16476.1	#0000FF	Ustilaginoidea virens.	A0A1B5L0I1	426	A0A1B5L0I1	Ustilaginoidea virens
2	497	Uncharacterized protein	BDMC01000004	ANO14919_019730	A0A1V1SVJ0	EMBL-CDS:GAW12603.1	#0000FF	fungal sp. No.14919.	A0A1V1SVJ0	391	A0A1V1SVJ0	fungal sp. No.14919
2	497	Uncharacterized protein	ABDF02000081	TRIVIDRAFT_171588	G9MZK6	GI:927416850|GI:358382390|EMBL-CDS:EHK20062.1|REFSEQ:XP_013954256.1	#0000FF	Hypocrea virens (strain Gv29-8 / FGSC 10586)	G9MZK6	252	G9MZK6	Trichoderma virens Gv29-8
2	497	Uncharacterized protein	AYSA01000249	SBOR_5226	W9CC93	GI:563294039|EMBL-CDS:ESZ94362.1	#0000FF	Sclerotinia borealis F-4128.	W9CC93	404	W9CC93	Sclerotinia borealis F-4128
2	497	Uncharacterized protein	LKCW01000024	AK830_g2551	A0A0P7BTX9	GI:936415737|EMBL-CDS:KPM44057.1	#0000FF	Neonectria ditissima.	A0A0P7BTX9	388	A0A0P7BTX9	Neonectria ditissima
2	497	Uncharacterized protein	CP017814	sscle_01g004270	A0A1D9PSI5	GI:1095448693|GI:156063792|EMBL-CDS:APA05657.1|REFSEQ:XP_001597818.1	#0000FF	Sclerotinia sclerotiorum (strain ATCC 18683 / 1980 / Ss-1)	A0A1D9PSI5	426	A0A1D9PSI5	Sclerotinia sclerotiorum 1980 UF-70
2	497	GH61 polysaccharide monooxygenase	LVVK01000022	A0O28_0044820	A0A1T3C909	GI:1153485475|EMBL-CDS:OPB37570.1	#0000FF	Trichoderma guizhouense.	A0A1T3C909	419	A0A1T3C909	Trichoderma guizhouense
2	497	Uncharacterized protein	JPKD01003296	V501_10120	A0A094IX66	GI:682436702|EMBL-CDS:KFZ01258.1	#0000FF	Pseudogymnoascus sp. VKM F-4519	A0A094IX66	408	A0A094IX66	Pseudogymnoascus sp. VKM F-4519 (FW-2642)
2	497	Uncharacterized protein	MTQA01000226	FNYG_12709	A0A2K0VVA3	EMBL-CDS:PNP73960.1	#0000FF	Gibberella nygamai	A0A2K0VVA3	404	A0A2K0VVA3	Fusarium nygamai
2	497	Uncharacterized protein	MOOB01000085	PENNAL_c0085G00446	A0A1V6XFP1	GI:1168176319|EMBL-CDS:OQE73953.1	#0000FF	Penicillium nalgiovense.	A0A1V6XFP1	378	A0A1V6XFP1	Penicillium nalgiovense
2	497	Uncharacterized protein	CH476622	SS1G_02014	A7E9N4	GI:156063792|GI:154697348|EMBL-CDS:EDN97086.1|REFSEQ:XP_001597818.1	#0000FF	Sclerotinia sclerotiorum (strain ATCC 18683 / 1980 / Ss-1)	A7E9N4	426	A7E9N4	Sclerotinia sclerotiorum 1980 UF-70
2	497	Uncharacterized protein	FQ790345	BofuT4P90000026001	G2YMX6	GI:347838402|EMBL-CDS:CCD52974.1	#0000FF	Botryotinia fuckeliana (strain T4)	G2YMX6	412	G2YMX6	Botrytis cinerea T4
2	497	Uncharacterized protein	KE145372	GLAREA_11394	S3DDV5	GI:512195976|GI:636771109|EMBL-CDS:EPE24813.1|REFSEQ:XP_008087728.1	#0000FF	Glarea lozoyensis (strain ATCC 20868 / MF5171)	S3DDV5	404	S3DDV5	Glarea lozoyensis ATCC 20868
2	497	Pc19g00200 protein	AM920434	Pc19g00200	B6HD14	GI:211587248|GI:255943492|EMBL-CDS:CAP79436.1|REFSEQ:XP_002562514.1	#0000FF	Penicillium rubens (strain ATCC 28089 / DSM 1075 / NRRL 1951 /Wisconsin 54-1255)	B6HD14	212	B6HD14	Penicillium rubens Wisconsin 54-1255
2	497	Uncharacterized protein	KB446555	MYCFIDRAFT_184656	N1Q7S7	GI:452987981|GI:631373376|EMBL-CDS:EME87736.1|REFSEQ:XP_007921068.1	#0000FF	Pseudocercospora fijiensis (strain CIRAD86)	N1Q7S7	408	N1Q7S7	Pseudocercospora fijiensis CIRAD86
2	497	Uncharacterized protein	KI912116	PFICI_10947	W3WT73	GI:573057198|GI:630031946|EMBL-CDS:ETS77073.1|REFSEQ:XP_007837719.1	#0000FF	Pestalotiopsis fici (strain W106-1 / CGMCC3.15140)	W3WT73	393	W3WT73	Pestalotiopsis fici W106-1
2	497	Glycoside hydrolase	AZHA01000012	BBO_04560	A0A167E6Z6	GI:1025655929|EMBL-CDS:OAA43417.1	#0000FF	Cordyceps brongniartii RCEF 3172.	A0A167E6Z6	415	A0A167E6Z6	Cordyceps brongniartii RCEF 3172
2	497	Uncharacterized protein	CAUH01007405	BGHDH14_bgh02286	N1JQK7	EMBL-CDS:CCU83020.1	#0000FF	Blumeria graminis f. sp. hordei (strain DH14)	N1JQK7	453	N1JQK7	Blumeria graminis f. sp. hordei DH14
2	497	Chitin-binding| domain 3	AZGY01000005	AAL_02934	A0A168E4U0	GI:1024759439|EMBL-CDS:KZZ98416.1	#0000FF	Moelleriella libera RCEF 2490.	A0A168E4U0	410	A0A168E4U0	Moelleriella libera RCEF 2490
2	497	Uncharacterized protein	MABQ02000003	AU210_004107	A0A2H3HU36	EMBL-CDS:PCD41559.1	#0000FF	Fusarium oxysporum f. sp. radicis-cucumerinum.	A0A2H3HU36	409	A0A2H3HU36	Fusarium oxysporum f. sp. radicis-cucumerinum
2	497	Uncharacterized protein	KL584824	M437DRAFT_71720	A0A074W4Z0	GI:662510343|EMBL-CDS:KEQ67948.1	#0000FF	Aureobasidium melanogenum CBS 110374.	A0A074W4Z0	399	A0A074W4Z0	Aureobasidium melanogenum CBS 110374
2	497	Putative chitin-domain 3 protein	KB708011	BcDW1_8027	M7TPM4	GI:472238475|EMBL-CDS:EMR83340.1	#0000FF	Botryotinia fuckeliana (strain BcDW1)	M7TPM4	412	M7TPM4	Botrytis cinerea BcDW1
3	61	Uncharacterized protein	ABSU01000025	ARB_02206	D4B177	GI:291175204|GI:302499312|EMBL-CDS:EFE31012.1|REFSEQ:XP_003011652.1	#FFA500	Arthroderma benhamiae (strain ATCC MYA-4681 / CBS 112371)	D4B177	260	D4B177	Trichophyton benhamiae CBS 112371
3	61	Uncharacterized protein	ACYE01000022	TRV_00455	D4D061	GI:302667625|GI:291189502|EMBL-CDS:EFE44783.1|REFSEQ:XP_003025394.1	#FFA500	Trichophyton verrucosum (strain HKI 0517)	D4D061	260	D4D061	Trichophyton verrucosum HKI 0517
3	61	Uncharacterized protein	KK207697	H103_00563	A0A022WGI1	GI:607921630|EMBL-CDS:EZF57153.1	#FFA500	Trichophyton rubrum CBS 288.86.	A0A022WGI1	261	A0A022WGI1	Trichophyton rubrum CBS 288.86
3	61	Uncharacterized protein	KK208726	H105_00551	A0A022Y798	GI:607945583|EMBL-CDS:EZF78396.1	#FFA500	Trichophyton soudanense CBS 452.61.	A0A022Y798	261	A0A022Y798	Trichophyton soudanense CBS 452.61
3	61	Uncharacterized protein	LHPM01000007	A7C99_0291	A0A178F7I2	GI:1030003599|GI:861302301|EMBL-CDS:OAL68351.1	#FFA500	Trichophyton rubrum	A0A178F7I2	261	A0A178F7I2	Trichophyton rubrum
3	61	Uncharacterized protein	GG700659	TERG_08178	F2T040	GI:327293393|GI:326466509|EMBL-CDS:EGD91962.1|REFSEQ:XP_003231393.1	#FFA500	Trichophyton rubrum (strain ATCC MYA-4607 / CBS 118892)	F2T040	261	F2T040	Trichophyton rubrum CBS 118892
3	61	Uncharacterized protein	DS995710	MCYG_08713	C5G191	GI:296803440|GI:238838892|EMBL-CDS:EEQ28554.1|REFSEQ:XP_002842573.1	#FFA500	Arthroderma otae (strain ATCC MYA-4605 / CBS 113480)	C5G191	261	C5G191	Microsporum canis CBS 113480
3	61	Uncharacterized protein	AOKY01000028	H109_00321	A0A059JJ20	GI:633052236|EMBL-CDS:KDB27891.1	#FFA500	Trichophyton interdigitale MR816.	A0A059JJ20	261	A0A059JJ20	Trichophyton interdigitale MR816
3	61	Uncharacterized protein	LHPN01000020	A7D00_7189	A0A178FA63	GI:1030004260|EMBL-CDS:OAL68934.1	#FFA500	Trichophyton violaceum.	A0A178FA63	261	A0A178FA63	Trichophyton violaceum
3	61	Uncharacterized protein	GG698528	TESG_07268	F2S8N9	GI:326475929|EMBL-CDS:EGD99938.1	#FFA500	Trichophyton tonsurans (strain CBS 112818)	F2S8N9	290	F2S8N9	Trichophyton tonsurans CBS 112818
3	61	Uncharacterized protein	BFBS01016367	TMEN_6908	A0A2P2ET30	EMBL-CDS:GBF64219.1	#FFA500	Trichophyton mentagrophytes.	A0A2P2ET30	257	A0A2P2ET30	Trichophyton mentagrophytes
3	61	Endoglucanase	DS995754	TEQG_05812	F2PYN4	GI:326482967|EMBL-CDS:EGE06977.1	#FFA500	Trichophyton equinum (strain ATCC MYA-4606 / CBS 127.97)	F2PYN4	261	F2PYN4	Trichophyton equinum CBS 127.97
3	61	Endoglucanase	GG692432	HCDG_07680	C6HN99	GI:240274429|EMBL-CDS:EER37945.1	#FFA500	Ajellomyces capsulatus (strain H143)	C6HN99	295	C6HN99	Histoplasma capsulatum H143
3	61	Uncharacterized protein	FWEW01003840	None	A0A1W5DEA5	EMBL-CDS:SLM41361.1	#FFA500	Umbilicaria pustulata.	A0A1W5DEA5	237	A0A1W5DEA5	Umbilicaria pustulata
3	61	Uncharacterized protein	DS989827	MGYG_07246	E4V2H4	GI:315043742|GI:311345036|EMBL-CDS:EFR04239.1|REFSEQ:XP_003171247.1	#FFA500	Arthroderma gypseum (strain ATCC MYA-4604 / CBS 118893)	E4V2H4	260	E4V2H4	Nannizzia gypsea CBS 118893
3	61	Uncharacterized protein	NPHW01003930	Egran_03513	A0A232LXB4	GI:1227551414|EMBL-CDS:OXV08724.1	#FFA500	Elaphomyces granulatus.	A0A232LXB4	279	A0A232LXB4	Elaphomyces granulatus
3	61	Uncharacterized protein	PDNC01000051	GX51_04202	A0A2B7X330	EMBL-CDS:PGH03167.1	#FFA500	Emmonsia parva.	A0A2B7X330	285	A0A2B7X330	Emmonsia parva
3	61	Uncharacterized protein	PDNB01000120	AJ79_06636	A0A2B7XBJ4	EMBL-CDS:PGH06102.1	#FFA500	Helicocarpus griseus UAMH5409.	A0A2B7XBJ4	309	A0A2B7XBJ4	Helicocarpus griseus UAMH5409
3	61	Endoglucanase	EQ999977	BDCG_04726	C5GLV0	GI:239612619|EMBL-CDS:EEQ89606.1	#FFA500	Ajellomyces dermatitidis (strain ER-3 / ATCC MYA-2586)	C5GLV0	285	C5GLV0	Blastomyces dermatitidis ER-3
3	61	Uncharacterized protein	LDEV01002710	EMPG_16576	A0A0H1B935	GI:824365275|EMBL-CDS:KLJ07949.1	#FFA500	Emmonsia parva UAMH 139.	A0A0H1B935	291	A0A0H1B935	Emmonsia parva UAMH 139
3	61	Endoglucanase	GG749504	BDDG_08677	F2TR69	GI:327356875|EMBL-CDS:EGE85732.1	#FFA500	Ajellomyces dermatitidis (strain ATCC 18188 / CBS 674.68)	F2TR69	285	F2TR69	Blastomyces dermatitidis ATCC 18188
3	61	Uncharacterized protein	GL538381	BDFG_03482	T5BXX5	GI:531984199|EMBL-CDS:EQL34786.1	#FFA500	Blastomyces dermatitidis ATCC 26199.	T5BXX5	285	T5BXX5	Blastomyces dermatitidis ATCC 26199
3	61	Endoglucanase	GG657466	BDBG_07609	A0A179UWN7	GI:261191598|GI:1033931379|EMBL-CDS:OAT12233.1|REFSEQ:XP_002622207.1	#FFA500	Blastomyces gilchristii (strain SLH14081)	A0A179UWN7	285	A0A179UWN7	Blastomyces gilchristii SLH14081
3	61	Uncharacterized protein	LGRN01000007	AJ78_00437	A0A1J9QUN1	GI:1103682898|EMBL-CDS:OJD19580.1	#FFA500	Emergomyces pasteuriana Ep9510.	A0A1J9QUN1	295	A0A1J9QUN1	Emergomyces pasteuriana Ep9510
3	61	Endoglucanase	BAUL01000085	PVAR5_2886	V5G053	EMBL-CDS:GAD94262.1	#FFA500	Byssochlamys spectabilis (strain No. 5 / NBRC 109023)	V5G053	298	V5G053	Byssochlamys spectabilis No. 5
3	61	Uncharacterized protein	LGUA01001528	ACJ72_07264	A0A1B7NNS1	GI:1035635377|EMBL-CDS:OAX78428.1	#FFA500	Emmonsia sp. CAC-2015a.	A0A1B7NNS1	296	A0A1B7NNS1	Emmonsia sp. CAC-2015a
3	61	Uncharacterized protein	ACFW01000030	CPC735_000010	C5NZW8	GI:240111597|GI:303318124|GI:303323802|GI:240108745|EMBL-CDS:EER26919.1|EMBL-CDS:EER29745.1|REFSEQ:XP_003069064.1|REFSEQ:XP_003071890.1	#FFA500	Coccidioides posadasii (strain C735)	C5NZW8	333	C5NZW8	Coccidioides posadasii C735 delta SOWgp
3	61	Uncharacterized protein	DS268114	CPAG_08635	A0A0J6FPN1	GI:855538250|EMBL-CDS:KMM72338.1	#FFA500	Coccidioides posadasii RMSCC 3488.	A0A0J6FPN1	374	A0A0J6FPN1	Coccidioides posadasii RMSCC 3488
3	61	Uncharacterized protein	DS016981	CIHG_00053	A0A0J8RBL4	GI:875634546|EMBL-CDS:KMU82267.1	#FFA500	Coccidioides immitis H538.4.	A0A0J8RBL4	366	A0A0J8RBL4	Coccidioides immitis H538.4
3	61	Uncharacterized protein	GL636491	CPSG_04247	E9D3Q8	GI:320036763|EMBL-CDS:EFW18701.1	#FFA500	Coccidioides posadasii (strain RMSCC 757 / Silveira)	E9D3Q8	387	E9D3Q8	Coccidioides posadasii str. Silveira
3	61	Uncharacterized protein	GG704916	CIMG_03033	J3KAG2	GI:767021996|GI:815876127|EMBL-CDS:EAS32009.3|REFSEQ:XP_001243592.2	#FFA500	Coccidioides immitis (strain RS)	J3KAG2	325	J3KAG2	Coccidioides immitis RS
3	61	Uncharacterized protein	KN305540	PABG_12278	A0A0A5IGM3	GI:719931217|EMBL-CDS:KGY14884.1	#FFA500	Paracoccidioides brasiliensis (strain Pb03)	A0A0A5IGM3	509	A0A0A5IGM3	Paracoccidioides brasiliensis Pb03
3	61	Uncharacterized protein	DS028097	CIRG_06877	A0A0J6YEW0	GI:859413604|EMBL-CDS:KMP07196.1	#FFA500	Coccidioides immitis RMSCC 2394.	A0A0J6YEW0	366	A0A0J6YEW0	Coccidioides immitis RMSCC 2394
3	61	Uncharacterized protein	DS268159	CISG_06831	A0A0J8QYX3	GI:875284342|EMBL-CDS:KMU78069.1	#FFA500	Coccidioides immitis RMSCC 3703.	A0A0J8QYX3	366	A0A0J8QYX3	Coccidioides immitis RMSCC 3703
3	61	Uncharacterized protein	MCFA01000018	BCR34DRAFT_597734	A0A1Y2A1X7	GI:1183391385|EMBL-CDS:ORY16454.1	#FFA500	Clohesyomyces aquaticus.	A0A1Y2A1X7	330	A0A1Y2A1X7	Clohesyomyces aquaticus
3	61	Uncharacterized protein	CH476656	HCAG_02158	A6QXQ1	GI:154282383|GI:150410167|EMBL-CDS:EDN05555.1|REFSEQ:XP_001541987.1	#FFA500	Ajellomyces capsulatus (strain NAm1 / WU24)	A6QXQ1	264	A6QXQ1	Histoplasma capsulatum NAm1
3	61	Uncharacterized protein	JH767558	W97_01465	R7YKB1	GI:494825026|GI:667826781|EMBL-CDS:EON62244.1|REFSEQ:XP_007777561.1	#FFA500	Coniosporium apollinis (strain CBS 100218)	R7YKB1	340	R7YKB1	Coniosporium apollinis CBS 100218
3	61	Uncharacterized protein	LCZI01000581	EMCG_08465	A0A0G2JAH2	GI:821509328|EMBL-CDS:KKZ65726.1	#FFA500	Emmonsia crescens UAMH 3008.	A0A0G2JAH2	293	A0A0G2JAH2	Emmonsia crescens UAMH 3008
3	61	Uncharacterized protein	PDNA01000035	AJ80_03258	A0A2B7YLH5	EMBL-CDS:PGH21467.1	#FFA500	Polytolypa hystricis UAMH7299.	A0A2B7YLH5	345	A0A2B7YLH5	Polytolypa hystricis UAMH7299
3	61	Uncharacterized protein	LZYO01000735	ACO22_07894	A0A1D2J3F2	GI:1059597986|EMBL-CDS:ODH12811.1	#FFA500	Paracoccidioides brasiliensis.	A0A1D2J3F2	293	A0A1D2J3F2	Paracoccidioides brasiliensis
3	61	Uncharacterized protein	LYUC01000115	GX48_07192	A0A1E2XVV6	GI:1059634283|EMBL-CDS:ODH46736.1	#FFA500	Paracoccidioides brasiliensis.	A0A1E2XVV6	296	A0A1E2XVV6	Paracoccidioides brasiliensis
3	61	Uncharacterized protein	GG663364	HCBG_01252	C0NED6	GI:225561327|EMBL-CDS:EEH09607.1	#FFA500	Ajellomyces capsulatus (strain G186AR / H82 / ATCC MYA-2454 / RMSCC2432)	C0NED6	343	C0NED6	Histoplasma capsulatum G186AR
3	61	Endoglucanase	DS990638	HCEG_03294	F0UF67	GI:325090769|EMBL-CDS:EGC44079.1	#FFA500	Ajellomyces capsulatus (strain H88)	F0UF67	394	F0UF67	Histoplasma capsulatum H88
3	61	Lytic polysaccharide monooxygenase	KV407456	L228DRAFT_244922	A0A165HX75	GI:1069602924|GI:1018271958|EMBL-CDS:KZF24053.1|REFSEQ:XP_018189608.1	#FFA500	Xylona heveae TC161.	A0A165HX75	235	A0A165HX75	Xylona heveae TC161
3	61	Uncharacterized protein	LGTZ01001012	ACJ73_06059	A0A1J9QQU9	GI:1103687096|EMBL-CDS:OJD22595.1	#FFA500	Blastomyces percursus.	A0A1J9QQU9	288	A0A1J9QQU9	Blastomyces percursus
3	61	Uncharacterized protein	KN275965	PADG_06584	C1GH48	GI:734683854|GI:226295085|EMBL-CDS:EEH50505.1|REFSEQ:XP_010762156.1	#FFA500	Paracoccidioides brasiliensis (strain Pb18)	C1GH48	296	C1GH48	Paracoccidioides brasiliensis Pb18
3	61	Uncharacterized protein	KB445562	BAUCODRAFT_283706	M2MLI4	GI:627814665|GI:449296238|EMBL-CDS:EMC92258.1|REFSEQ:XP_007680680.1	#FFA500	Baudoinia panamericana (strain UAMH 10762)	M2MLI4	249	M2MLI4	Baudoinia panamericana UAMH 10762
3	61	Uncharacterized protein	PDND01000190	GX50_07100	A0A2B7ZAA3	EMBL-CDS:PGH30123.1	#FFA500	Emmonsia crescens.	A0A2B7ZAA3	293	A0A2B7ZAA3	Emmonsia crescens
3	61	Uncharacterized protein	LFZN01000259	AC578_7625	A0A139GX83	GI:1002198718|EMBL-CDS:KXS94762.1	#FFA500	Mycosphaerella eumusae.	A0A139GX83	260	A0A139GX83	Mycosphaerella eumusae
3	61	Lytic polysaccharide monooxygenase	MNUE01000022	BKCO1_2200081	A0A1J9QZU7	GI:1103748146|EMBL-CDS:OJD34622.1	#FFA500	Diplodia corticola.	A0A1J9QZU7	383	A0A1J9QZU7	Diplodia corticola
3	61	Uncharacterized protein	LAQI01000179	UCDDS831_g07465	A0A0G2DYC9	GI:821060357|EMBL-CDS:KKY15862.1	#FFA500	Diplodia seriata.	A0A0G2DYC9	384	A0A0G2DYC9	Diplodia seriata
3	61	Uncharacterized protein	KB446557	MYCFIDRAFT_195305	M3B475	GI:631380844|GI:452984421|EMBL-CDS:EME84178.1|REFSEQ:XP_007924802.1	#FFA500	Pseudocercospora fijiensis (strain CIRAD86)	M3B475	260	M3B475	Pseudocercospora fijiensis CIRAD86
3	61	Uncharacterized protein	AHHD01000455	MPH_10635	K2RCE1	GI:407918969|EMBL-CDS:EKG12228.1	#FFA500	Macrophomina phaseolina (strain MS6)	K2RCE1	385	K2RCE1	Macrophomina phaseolina MS6
3	61	Uncharacterized protein	LT853694	ZT3D7_G3742	A0A1X7RME4	EMBL-CDS:SMQ48592.1	#FFA500	Zymoseptoria tritici ST99CH_3D7.	A0A1X7RME4	328	A0A1X7RME4	Zymoseptoria tritici ST99CH_3D7
3	61	Uncharacterized protein	LT882678	ZT1A5_G3725	A0A1Y6LCW9	EMBL-CDS:SMY22286.1	#FFA500	Zymoseptoria tritici ST99CH_1A5.	A0A1Y6LCW9	328	A0A1Y6LCW9	Zymoseptoria tritici ST99CH_1A5
3	61	Uncharacterized protein	LT854275	ZT3D1_G3686	A0A2H1G7S0	EMBL-CDS:SMR49589.1	#FFA500	Zymoseptoria tritici ST99CH_3D1.	A0A2H1G7S0	328	A0A2H1G7S0	Zymoseptoria tritici ST99CH_3D1
3	61	Putative endoglucanase protein	KB916349	UCRNP2_6019	R1GG36	GI:615416647|GI:485921556|EMBL-CDS:EOD47246.1|REFSEQ:XP_007585288.1	#FFA500	Botryosphaeria parva (strain UCR-NP2)	R1GG36	353	R1GG36	Neofusicoccum parvum UCRNP2
3	61	Uncharacterized protein	KN294038	PAAG_08796	C1HDF5	GI:295657445|GI:226283961|EMBL-CDS:EEH39527.1|REFSEQ:XP_002789291.1	#FFA500	Paracoccidioides lutzii (strain ATCC MYA-826 / Pb01)	C1HDF5	260	C1HDF5	Paracoccidioides lutzii Pb01
3	61	Uncharacterized protein	CM001198	MYCGRDRAFT_38707	F9X5L3	GI:339474417|GI:398406136|EMBL-CDS:EGP89510.1|REFSEQ:XP_003854534.1	#FFA500	Zymoseptoria tritici (strain CBS 115943 / IPO323)	F9X5L3	233	F9X5L3	Zymoseptoria tritici IPO323
3	61	Uncharacterized protein	NAJO01000018	B0A48_09990	A0A1V8T3L8	GI:1172590725|EMBL-CDS:OQO05894.1	#FFA500	Rachicladosporium antarcticum.	A0A1V8T3L8	292	A0A1V8T3L8	Rachicladosporium antarcticum
3	61	Uncharacterized protein	LAFY01004225	TI39_contig4266g00004	A0A0F4G8S3	GI:796694914|EMBL-CDS:KJX93729.1	#FFA500	Zymoseptoria brevis.	A0A0F4G8S3	307	A0A0F4G8S3	Zymoseptoria brevis
4	55	Uncharacterized protein	LYXU01000001	FPOA_02411	A0A1B8B6W8	GI:1040035748|EMBL-CDS:OBS28473.1	#008000	Fusarium poae.	A0A1B8B6W8	398	A0A1B8B6W8	Fusarium poae
4	55	Uncharacterized protein	NQOC01000001	FGRA07_00707	A0A2H3HBL2	EMBL-CDS:PCD39436.1	#008000	Gibberella zeae	A0A2H3HBL2	391	A0A2H3HBL2	Fusarium graminearum
4	55	Uncharacterized protein	LN649229	None	A0A2L2TNI6	EMBL-CDS:CEI66317.1	#008000	Fusarium venenatum.	A0A2L2TNI6	398	A0A2L2TNI6	Fusarium venenatum
4	55	Uncharacterized protein	MAVT02001254	DHEL01_v210128	A0A2P5HMK4	EMBL-CDS:POS71476.1	#008000	Diaporthe helianthi.	A0A2P5HMK4	360	A0A2P5HMK4	Diaporthe helianthi
4	55	Uncharacterized protein	HG970332	FGRAMPH1_01T05817	I1RFE8	GI:699043726|GI:558857774|GI:758191927|EMBL-CDS:CEF74713.1|REFSEQ:XP_011318342.1	#008000	Gibberella zeae (strain PH-1 / ATCC MYA-4620 / FGSC 9075 / NRRL 31084)	I1RFE8	391	I1RFE8	Fusarium graminearum PH-1
4	55	Uncharacterized protein	CH408029	CHGG_01267	Q2HET7	GI:116181278|GI:88185564|EMBL-CDS:EAQ93032.1|REFSEQ:XP_001220488.1	#008000	Chaetomium globosum (strain ATCC 6205 / CBS 148.51 / DSM 1962 / NBRC6347 / NRRL 1970)	Q2HET7	441	Q2HET7	Chaetomium globosum CBS 148.51
4	55	Uncharacterized protein	AFNW01000054	FPSE_01985	K3VQU5	GI:685852693|GI:408398764|EMBL-CDS:EKJ77892.1|REFSEQ:XP_009253379.1	#008000	Fusarium pseudograminearum (strain CS3096)	K3VQU5	391	K3VQU5	Fusarium pseudograminearum CS3096
4	55	Uncharacterized protein	CM001233	MGG_05070	G4N458	GI:351644917|GI:389629864|EMBL-CDS:EHA52778.1|REFSEQ:XP_003712585.1	#008000	Magnaporthe oryzae (strain 70-15 / ATCC MYA-4617 / FGSC 8958)	G4N458	407	G4N458	Magnaporthe oryzae 70-15
4	55	Uncharacterized protein	JH792938	OOU_Y34scaffold00174g87	L7IKN7	GI:440474373|EMBL-CDS:ELQ43122.1	#008000	Magnaporthe oryzae (strain Y34)	L7IKN7	404	L7IKN7	Magnaporthe oryzae Y34
4	55	Uncharacterized protein	JH795229	OOW_P131scaffold00266g5	L7JJT8	GI:440488392|EMBL-CDS:ELQ68119.1	#008000	Magnaporthe oryzae (strain P131)	L7JJT8	404	L7JJT8	Magnaporthe oryzae P131
4	55	Uncharacterized protein	LCUC01000692	UCDDA912_g10510	A0A0G2F474	GI:821075561|EMBL-CDS:KKY29572.1	#008000	Diaporthe ampelina.	A0A0G2F474	245	A0A0G2F474	Diaporthe ampelina
4	55	Uncharacterized protein	GL385398	GGTG_08038	J3P3F1	GI:402078928|GI:685410559|EMBL-CDS:EJT74193.1|REFSEQ:XP_009224137.1	#008000	Gaeumannomyces graminis var. tritici (strain R3-111a-1)	J3P3F1	407	J3P3F1	Gaeumannomyces tritici R3-111a-1
4	55	Uncharacterized protein	LCTW02000075	MMYC01_202410	A0A175W8T5	GI:1003744322|EMBL-CDS:KXX79871.1	#008000	Madurella mycetomatis.	A0A175W8T5	384	A0A175W8T5	Madurella mycetomatis
4	55	Uncharacterized protein	CP003002	MYCTH_2295431	G2Q4Y4	GI:367019362|GI:347006233|EMBL-CDS:AEO53721.1|REFSEQ:XP_003658966.1	#008000	Myceliophthora thermophila (strain ATCC 42464 / BCRC 31852 / DSM 1799)	G2Q4Y4	188	G2Q4Y4	Thermothelomyces thermophila ATCC 42464
4	55	Uncharacterized protein	MNUE01000034	BKCO1_34000119	A0A1J9QVK0	GI:1103746526|EMBL-CDS:OJD33014.1	#008000	Diplodia corticola.	A0A1J9QVK0	411	A0A1J9QVK0	Diplodia corticola
4	55	Uncharacterized protein	MSZU01000084	BK809_0004349	A0A1S8BEC2	GI:1137652270|EMBL-CDS:OMP85678.1	#008000	Diplodia seriata.	A0A1S8BEC2	413	A0A1S8BEC2	Diplodia seriata
4	55	Uncharacterized protein	KL584830	M437DRAFT_28992	A0A074WMU2	GI:662506165|EMBL-CDS:KEQ63776.1	#008000	Aureobasidium melanogenum CBS 110374.	A0A074WMU2	357	A0A074WMU2	Aureobasidium melanogenum CBS 110374
4	55	Uncharacterized protein	KB916395	UCRNP2_6442	R1GLD9	GI:485920965|GI:615417971|EMBL-CDS:EOD46824.1|REFSEQ:XP_007585707.1	#008000	Botryosphaeria parva (strain UCR-NP2)	R1GLD9	420	R1GLD9	Neofusicoccum parvum UCRNP2
4	55	Uncharacterized protein	KL584757	AUEXF2481DRAFT_667076	A0A074YJF4	GI:915695675|GI:662538874|EMBL-CDS:KEQ96179.1|REFSEQ:XP_013344755.1	#008000	Aureobasidium subglaciale EXF-2481.	A0A074YJF4	385	A0A074YJF4	Aureobasidium subglaciale EXF-2481
4	55	Uncharacterized protein	KL584705	M436DRAFT_12732	A0A074X0W5	GI:662518096|GI:918821462|EMBL-CDS:KEQ75657.1|REFSEQ:XP_013429373.1	#008000	Aureobasidium namibiae CBS 147.97.	A0A074X0W5	204	A0A074X0W5	Aureobasidium namibiae CBS 147.97
4	55	Uncharacterized protein	CP003009	THITE_2023982	G2QVT1	GI:346997459|GI:367039635|EMBL-CDS:AEO63862.1|REFSEQ:XP_003650198.1	#008000	Thielavia terrestris (strain ATCC 38088 / NRRL 8126)	G2QVT1	376	G2QVT1	Thielavia terrestris NRRL 8126
4	55	Uncharacterized protein	CP003002	MYCTH_2299757	G2PZJ4	GI:367023280|GI:347008192|EMBL-CDS:AEO55680.1|REFSEQ:XP_003660925.1	#008000	Myceliophthora thermophila (strain ATCC 42464 / BCRC 31852 / DSM 1799)	G2PZJ4	405	G2PZJ4	Thermothelomyces thermophila ATCC 42464
4	55	Uncharacterized protein	LCTW02000351	MMYC01_200458	A0A175VTF3	GI:1003747931|GI:1003737556|EMBL-CDS:KXX74451.1|EMBL-CDS:KXX83021.1	#008000	Madurella mycetomatis.	A0A175VTF3	355	A0A175VTF3	Madurella mycetomatis
4	55	Podospora anserina S mat+ genomic DNA chromosome 4| supercontig 4	CU633895	PODANS_4_4790	B2AQA8	GI:170941397|GI:171682876|GI:681098895|EMBL-CDS:CAP67048.1|EMBL-CDS:CDP28790.1|REFSEQ:XP_001906381.1	#008000	Podospora anserina (strain S / ATCC MYA-4624 / DSM 980 / FGSC 10383)	B2AQA8	516	B2AQA8	Podospora anserina S mat+
4	55	Uncharacterized protein	KB933188	UCRPA7_5633	R8BHQ3	GI:500255489|GI:631242894|EMBL-CDS:EON98853.1|REFSEQ:XP_007916369.1	#008000	Togninia minima (strain UCR-PA7)	R8BHQ3	859	R8BHQ3	Phaeoacremonium minimum UCRPA7
4	55	Uncharacterized protein	CH408034	CHGG_09436	Q2GRG8	GI:116203103|GI:88177954|EMBL-CDS:EAQ85422.1|REFSEQ:XP_001227363.1	#008000	Chaetomium globosum (strain ATCC 6205 / CBS 148.51 / DSM 1962 / NBRC6347 / NRRL 1970)	Q2GRG8	388	Q2GRG8	Chaetomium globosum CBS 148.51
4	55	Uncharacterized protein	CP003013	THITE_2029285	G2RCI4	GI:367053153|GI:347004220|EMBL-CDS:AEO70619.1|REFSEQ:XP_003656955.1	#008000	Thielavia terrestris (strain ATCC 38088 / NRRL 8126)	G2RCI4	260	G2RCI4	Thielavia terrestris NRRL 8126
4	55	Uncharacterized protein	JH717901	FOZG_10177	W9KB60	GI:587692023|EMBL-CDS:EWZ38628.1	#008000	Fusarium oxysporum Fo47.	W9KB60	360	W9KB60	Fusarium oxysporum Fo47
4	55	WGS project CABT00000000 data| contig 2.4	CABT02000004	SMAC_01500	F7VR04	GI:336275827|EMBL-CDS:CCC07937.1|REFSEQ:XP_003352667.1	#008000	Sordaria macrospora (strain ATCC MYA-333 / DSM 997 / K(L3346)	F7VR04	567	F7VR04	Sordaria macrospora k-hell
4	55	Uncharacterized protein	GL891382	NEUTE1DRAFT_53322	F8MZR0	GI:698997426|GI:336463807|EMBL-CDS:EGO52047.1|REFSEQ:XP_009855694.1	#008000	Neurospora tetrasperma (strain FGSC 2508 / ATCC MYA-4615 / P0657)	F8MZR0	522	F8MZR0	Neurospora tetrasperma FGSC 2508
4	55	Uncharacterized protein	DS022253	FVEG_09332	W7MQV2	GI:1092973536|GI:584140661|EMBL-CDS:EWG49995.1|REFSEQ:XP_018756186.1	#008000	Gibberella moniliformis (strain M3125 / FGSC 7600)	W7MQV2	402	W7MQV2	Fusarium verticillioides 7600
4	55	Lytic polysaccharide monooxygenase	KN389776	GE21DRAFT_1888	A0A0B0DIE8	GI:725976345|EMBL-CDS:KHE79834.1	#008000	Neurospora crassa.	A0A0B0DIE8	542	A0A0B0DIE8	Neurospora crassa
4	55	Related to spore coat protein SP96	FCQH01000012	FMAN_08181	A0A1L7TTZ5	EMBL-CDS:CVL02060.1	#008000	Fusarium mangiferae	A0A1L7TTZ5	402	A0A1L7TTZ5	Fusarium mangiferae
4	55	Uncharacterized protein	MABQ02000005	AU210_008506	A0A2H3GZV2	EMBL-CDS:PCD35951.1	#008000	Fusarium oxysporum f. sp. radicis-cucumerinum.	A0A2H3GZV2	360	A0A2H3GZV2	Fusarium oxysporum f. sp. radicis-cucumerinum
4	55	Related to spore coat protein SP96	FMJY01000001	FRV6_01259	A0A2H3SKP3	EMBL-CDS:SCO77047.1	#008000	Fusarium oxysporum	A0A2H3SKP3	386	A0A2H3SKP3	Fusarium oxysporum
4	55	Uncharacterized protein	MTQA01000317	FNYG_14174	A0A2K0UTJ6	EMBL-CDS:PNP61086.1	#008000	Gibberella nygamai	A0A2K0UTJ6	382	A0A2K0UTJ6	Fusarium nygamai
4	55	Uncharacterized protein	KB726312	FOC4_g10008988	N1S7G8	GI:475673414|EMBL-CDS:EMT70525.1	#008000	Fusarium oxysporum f. sp. cubense (strain race 4)	N1S7G8	360	N1S7G8	Fusarium oxysporum f. sp. cubense race 4
4	55	Uncharacterized protein	CM002236	NCU00822	Q7SEB2	GI:85112556|GI:28926144|EMBL-CDS:EAA35129.1|REFSEQ:XP_964365.1	#008000	Neurospora crassa (strain ATCC 24698 / 74-OR23-1A / CBS 708.71 / DSM1257 / FGSC 987)	Q7SEB2	542	Q7SEB2	Neurospora crassa OR74A
4	55	Uncharacterized protein	JH650971	FOVG_06948	W9PLV5	GI:587748493|EMBL-CDS:EXA46209.1	#008000	Fusarium oxysporum f. sp. pisi HDV247.	W9PLV5	386	W9PLV5	Fusarium oxysporum f. sp. pisi HDV247
4	55	Uncharacterized protein	JH658371	FOQG_05891	X0CM30	GI:590064360|EMBL-CDS:EXK91884.1	#008000	Fusarium oxysporum f. sp. raphani 54005.	X0CM30	386	X0CM30	Fusarium oxysporum f. sp. raphani 54005
4	55	Uncharacterized protein	JH658285	FOIG_09010	X0KQT0	GI:591467763|EMBL-CDS:EXL99134.1	#008000	Fusarium oxysporum f. sp. cubense tropical race 4 54006.	X0KQT0	360	X0KQT0	Fusarium oxysporum f. sp. cubense tropical race 4
4	55	Related to spore coat protein SP96	FJOF01000011	FPRO_08625	A0A1L7W4L2	EMBL-CDS:CZR47251.1	#008000	Fusarium proliferatum (strain ET1)	A0A1L7W4L2	415	A0A1L7W4L2	Fusarium proliferatum ET1
4	55	Uncharacterized protein	GL890999	NEUTE2DRAFT_134115	G4U984	GI:350295880|EMBL-CDS:EGZ76857.1	#008000	Neurospora tetrasperma (strain FGSC 2509 / P0656)	G4U984	539	G4U984	Neurospora tetrasperma FGSC 2509
4	55	Uncharacterized protein	JH717843	FOYG_08878	W9IHJ7	GI:587669620|EMBL-CDS:EWY91961.1	#008000	Fusarium oxysporum FOSC 3-a.	W9IHJ7	399	W9IHJ7	Fusarium oxysporum FOSC 3-a
4	55	Uncharacterized protein	JH659332	FOMG_07471	X0A9B4	GI:590038861|EMBL-CDS:EXK40719.1	#008000	Fusarium oxysporum f. sp. melonis 26406.	X0A9B4	399	X0A9B4	Fusarium oxysporum f. sp. melonis 26406
4	55	Uncharacterized protein	JH657942	FOTG_10060	X0L806	GI:591492483|EMBL-CDS:EXM22079.1	#008000	Fusarium oxysporum f. sp. vasinfectum 25433.	X0L806	399	X0L806	Fusarium oxysporum f. sp. vasinfectum 25433
4	55	Uncharacterized protein	DS231708	FOXG_10683	A0A0D2Y332	GI:1070343877|GI:902738933|EMBL-CDS:KNB10502.1|REFSEQ:XP_018248547.1	#008000	Fusarium oxysporum f. sp. lycopersici (strain 4287 / CBS 123668 / FGSC9935 / NRRL 34936)	A0A0D2Y332	399	A0A0D2Y332	Fusarium oxysporum f. sp. lycopersici 4287
4	55	Spore coat protein SP96	JRVG01000123	LW93_14905	A0A0J0BYE6	GI:829106595|EMBL-CDS:KLO83237.1	#008000	Gibberella fujikuroi	A0A0J0BYE6	409	A0A0J0BYE6	Fusarium fujikuroi
4	55	Uncharacterized protein	LKCW01000018	AK830_g1976	A0A0P7B4J0	GI:936416253|EMBL-CDS:KPM44544.1	#008000	Neonectria ditissima.	A0A0P7B4J0	424	A0A0P7B4J0	Neonectria ditissima
4	55	Related to spore coat protein SP96	FMJU01000002	FFC1_03623	A0A2H3RL76	GI:829150942|GI:829130194|EMBL-CDS:SCN80622.1	#008000	Gibberella fujikuroi	A0A2H3RL76	409	A0A2H3RL76	Fusarium fujikuroi
4	55	Uncharacterized protein	GG698912	NECHADRAFT_44080	C7ZAA0	GI:302892941|GI:256726277|EMBL-CDS:EEU39639.1|REFSEQ:XP_003045352.1	#008000	Nectria haematococca (strain 77-13-4 / ATCC MYA-4622 / FGSC 9596 /MPVI)	C7ZAA0	384	C7ZAA0	[Nectria] haematococca mpVI 77-13-4
4	55	Uncharacterized protein	KB730034	FOC1_g10009901	N4UFC5	GI:477522416|EMBL-CDS:ENH74483.1	#008000	Fusarium oxysporum f. sp. cubense (strain race 1)	N4UFC5	399	N4UFC5	Fusarium oxysporum f. sp. cubense race 1
4	55	Related to spore coat protein SP96	HF679027	FFUJ_08038	S0E2S6	GI:517318029|EMBL-CDS:CCT69101.1	#008000	Gibberella fujikuroi (strain CBS 195.34 / IMI 58289 / NRRL A-6831)	S0E2S6	409	S0E2S6	Fusarium fujikuroi IMI 58289
4	55	Uncharacterized protein	AFQF01003139	FOXB_12585	F9G1Q3	GI:342875025|EMBL-CDS:EGU76897.1	#008000	Fusarium oxysporum (strain Fo5176)	F9G1Q3	386	F9G1Q3	Fusarium oxysporum Fo5176
4	55	Uncharacterized protein	KK033200	FOPG_10370	X0IN19	GI:591441855|EMBL-CDS:EXL74474.1	#008000	Fusarium oxysporum f. sp. conglutinans race 2 54008.	X0IN19	386	X0IN19	Fusarium oxysporum f. sp. conglutinans race 2 5400
5	35	Uncharacterized protein	KZ303486	COEREDRAFT_79042	A0A2G5BM89	EMBL-CDS:PIA19767.1	#FF00FF	Coemansia reversa (strain ATCC 12441 / NRRL 1564)	A0A2G5BM89	382	A0A2G5BM89	Coemansia reversa NRRL 1564
5	35	Uncharacterized protein	KZ303486	COEREDRAFT_84377	A0A2G5BL84	EMBL-CDS:PIA19768.1	#FF00FF	Coemansia reversa (strain ATCC 12441 / NRRL 1564)	A0A2G5BL84	374	A0A2G5BL84	Coemansia reversa NRRL 1564
5	35	Uncharacterized protein	MCFD01000006	DL89DRAFT_148402	A0A1Y1W954	GI:1183340915|EMBL-CDS:ORX69858.1	#FF00FF	Linderina pennispora.	A0A1Y1W954	241	A0A1Y1W954	Linderina pennispora
5	35	Uncharacterized protein	KZ303486	COEREDRAFT_79027	A0A2G5BL69	EMBL-CDS:PIA19750.1	#FF00FF	Coemansia reversa (strain ATCC 12441 / NRRL 1564)	A0A2G5BL69	410	A0A2G5BL69	Coemansia reversa NRRL 1564
5	35	Uncharacterized protein	LSSK01000075	AX774_g951	A0A1R1PWZ7	GI:1134548500|EMBL-CDS:OMH85500.1	#FF00FF	Zancudomyces culisetae	A0A1R1PWZ7	270	A0A1R1PWZ7	Zancudomyces culisetae
5	35	Uncharacterized protein	LSSL01000449	AYI68_g1258	A0A1R0H661	GI:1132469177|EMBL-CDS:OLY84574.1	#FF00FF	Smittium mucronatum.	A0A1R0H661	529	A0A1R0H661	Smittium mucronatum
5	35	Uncharacterized protein	KZ303486	COEREDRAFT_79034	A0A2G5BL74	EMBL-CDS:PIA19756.1	#FF00FF	Coemansia reversa (strain ATCC 12441 / NRRL 1564)	A0A2G5BL74	436	A0A2G5BL74	Coemansia reversa NRRL 1564
5	35	Uncharacterized protein	LSSK01001564	AX774_g7188	A0A1R1PEK9	GI:1134540907|EMBL-CDS:OMH79396.1	#FF00FF	Zancudomyces culisetae	A0A1R1PEK9	267	A0A1R1PEK9	Zancudomyces culisetae
5	35	Uncharacterized protein	LSSK01000171	AX774_g1850	A0A1R1PUM9	GI:1134547523|EMBL-CDS:OMH84619.1	#FF00FF	Zancudomyces culisetae	A0A1R1PUM9	281	A0A1R1PUM9	Zancudomyces culisetae
5	35	Uncharacterized protein	KZ303486	COEREDRAFT_84355	A0A2G5BL52	EMBL-CDS:PIA19744.1	#FF00FF	Coemansia reversa (strain ATCC 12441 / NRRL 1564)	A0A2G5BL52	229	A0A2G5BL52	Coemansia reversa NRRL 1564
5	35	Uncharacterized protein	LSSK01000171	AX774_g1851	A0A1R1PUG8	GI:1134547524|EMBL-CDS:OMH84620.1	#FF00FF	Zancudomyces culisetae	A0A1R1PUG8	267	A0A1R1PUG8	Zancudomyces culisetae
5	35	Uncharacterized protein	LSSK01000061	AX774_g776	A0A1R1PXG3	GI:1134548679|EMBL-CDS:OMH85665.1	#FF00FF	Zancudomyces culisetae	A0A1R1PXG3	267	A0A1R1PXG3	Zancudomyces culisetae
5	35	Uncharacterized protein	KZ303486	COEREDRAFT_84276	A0A2G5BKX0	EMBL-CDS:PIA19653.1	#FF00FF	Coemansia reversa (strain ATCC 12441 / NRRL 1564)	A0A2G5BKX0	726	A0A2G5BKX0	Coemansia reversa NRRL 1564
5	35	Uncharacterized protein	LSSN01004744	AYI70_g9975	A0A1R1X8Q0	GI:1134797037|EMBL-CDS:OMJ10996.1	#FF00FF	Smittium culicis.	A0A1R1X8Q0	569	A0A1R1X8Q0	Smittium culicis
5	35	Uncharacterized protein	LSSM01005306	AYI69_g9208	A0A1R1XE77	GI:1134801026|EMBL-CDS:OMJ12932.1	#FF00FF	Smittium culicis.	A0A1R1XE77	564	A0A1R1XE77	Smittium culicis
5	35	Uncharacterized protein	MCFD01000006	DL89DRAFT_267112	A0A1Y1W8Q0	GI:1183340940|EMBL-CDS:ORX69883.1	#FF00FF	Linderina pennispora.	A0A1Y1W8Q0	347	A0A1Y1W8Q0	Linderina pennispora
5	35	Uncharacterized protein	MCFD01000030	DL89DRAFT_114581	A0A1Y1VVT6	GI:1183336340|EMBL-CDS:ORX65412.1	#FF00FF	Linderina pennispora.	A0A1Y1VVT6	340	A0A1Y1VVT6	Linderina pennispora
5	35	Uncharacterized protein	MCFD01000006	DL89DRAFT_267120	A0A1Y1W8P1	GI:1183340944|EMBL-CDS:ORX69887.1	#FF00FF	Linderina pennispora.	A0A1Y1W8P1	353	A0A1Y1W8P1	Linderina pennispora
5	35	Uncharacterized protein	MCFD01000030	DL89DRAFT_325682	A0A1Y1VW31	GI:1183336341|EMBL-CDS:ORX65413.1	#FF00FF	Linderina pennispora.	A0A1Y1VW31	459	A0A1Y1VW31	Linderina pennispora
5	35	Uncharacterized protein	KZ303486	COEREDRAFT_79028	A0A2G5BL86	EMBL-CDS:PIA19751.1	#FF00FF	Coemansia reversa (strain ATCC 12441 / NRRL 1564)	A0A2G5BL86	385	A0A2G5BL86	Coemansia reversa NRRL 1564
5	35	Uncharacterized protein	KZ303486	COEREDRAFT_79025	A0A2G5BL47	EMBL-CDS:PIA19745.1	#FF00FF	Coemansia reversa (strain ATCC 12441 / NRRL 1564)	A0A2G5BL47	211	A0A2G5BL47	Coemansia reversa NRRL 1564
5	35	Uncharacterized protein	KZ303486	COEREDRAFT_36584	A0A2G5BL04	EMBL-CDS:PIA19652.1	#FF00FF	Coemansia reversa (strain ATCC 12441 / NRRL 1564)	A0A2G5BL04	211	A0A2G5BL04	Coemansia reversa NRRL 1564
5	35	Uncharacterized protein	MCFD01000140	DL89DRAFT_327209	A0A1Y1VRN5	GI:1183334525|EMBL-CDS:ORX63927.1	#FF00FF	Linderina pennispora.	A0A1Y1VRN5	421	A0A1Y1VRN5	Linderina pennispora
5	35	Uncharacterized protein	MCFD01000015	DL89DRAFT_270165	A0A1Y1VZD4	GI:1183337620|EMBL-CDS:ORX66637.1	#FF00FF	Linderina pennispora.	A0A1Y1VZD4	333	A0A1Y1VZD4	Linderina pennispora
5	35	Uncharacterized protein	MCFD01000015	DL89DRAFT_325023	A0A1Y1W031	GI:1183337618|EMBL-CDS:ORX66635.1	#FF00FF	Linderina pennispora.	A0A1Y1W031	324	A0A1Y1W031	Linderina pennispora
5	35	Uncharacterized protein	MCFD01000015	DL89DRAFT_205660	A0A1Y1W058	GI:1183337619|EMBL-CDS:ORX66636.1	#FF00FF	Linderina pennispora.	A0A1Y1W058	198	A0A1Y1W058	Linderina pennispora
5	35	Uncharacterized protein	LSSM01000318	AYI69_g1187	A0A1R1YQY5	GI:1134826115|EMBL-CDS:OMJ29319.1	#FF00FF	Smittium culicis.	A0A1R1YQY5	387	A0A1R1YQY5	Smittium culicis
5	35	Uncharacterized protein	LSSK01000608	AX774_g3789	A0A1R1PP23	GI:1134545184|EMBL-CDS:OMH82717.1	#FF00FF	Zancudomyces culisetae	A0A1R1PP23	527	A0A1R1PP23	Zancudomyces culisetae
5	35	Uncharacterized protein	MCFD01000140	DL89DRAFT_288741	A0A1Y1VRL6	GI:1183334526|EMBL-CDS:ORX63928.1	#FF00FF	Linderina pennispora.	A0A1Y1VRL6	319	A0A1Y1VRL6	Linderina pennispora
5	35	Uncharacterized protein	LSSN01004435	AYI70_g9670	A0A1R1XA58	GI:1134798180|EMBL-CDS:OMJ11520.1	#FF00FF	Smittium culicis.	A0A1R1XA58	387	A0A1R1XA58	Smittium culicis
5	35	Uncharacterized protein	LSSN01003927	AYI70_g9063	A0A1R1XD45	GI:1134800194|EMBL-CDS:OMJ12526.1	#FF00FF	Smittium culicis.	A0A1R1XD45	368	A0A1R1XD45	Smittium culicis
5	35	Uncharacterized protein	MCFD01000015	DL89DRAFT_65749	A0A1Y1W0J7	GI:1183337617|EMBL-CDS:ORX66634.1	#FF00FF	Linderina pennispora.	A0A1Y1W0J7	335	A0A1Y1W0J7	Linderina pennispora
5	35	Uncharacterized protein	LSSL01000479	AYI68_g1359	A0A1R0H5W8	GI:1132469054|EMBL-CDS:OLY84481.1	#FF00FF	Smittium mucronatum.	A0A1R0H5W8	443	A0A1R0H5W8	Smittium mucronatum
5	35	Uncharacterized protein	MCFD01000015	DL89DRAFT_65774	A0A1Y1VZF8	GI:1183337622|EMBL-CDS:ORX66639.1	#FF00FF	Linderina pennispora.	A0A1Y1VZF8	229	A0A1Y1VZF8	Linderina pennispora
5	35	Uncharacterized protein	MCFD01000015	DL89DRAFT_210111	A0A1Y1VZE9	GI:1183337616|EMBL-CDS:ORX66633.1	#FF00FF	Linderina pennispora.	A0A1Y1VZE9	193	A0A1Y1VZE9	Linderina pennispora
6	29	Lytic polysaccharide monooxygenase	KZ111255	K449DRAFT_436008	A0A1Y2TPR3	GI:1190867641|EMBL-CDS:OTA59749.1	#808080	Hypoxylon sp. EC38.	A0A1Y2TPR3	330	A0A1Y2TPR3	Hypoxylon sp. EC38
6	29	Endoglucanase	KB020924	CGGC5_10995	L2FRR2	GI:596700907|GI:429853318|EMBL-CDS:ELA28398.1|REFSEQ:XP_007282540.1	#808080	Colletotrichum gloeosporioides (strain Nara gc5)	L2FRR2	195	L2FRR2	Colletotrichum gloeosporioides Nara gc5
6	29	Endoglucanase	AMYD01000313	CGLO_01444	T0MBD9	GI:530479072|EMBL-CDS:EQB58330.1	#808080	Colletotrichum gloeosporioides (strain Cg-14)	T0MBD9	370	T0MBD9	Colletotrichum gloeosporioides Cg-14
6	29	Uncharacterized protein	KV842098	CSPAE12_08965	A0A1S1VJR2	GI:1093040280|EMBL-CDS:OHW92597.1	#808080	Colletotrichum incanum.	A0A1S1VJR2	356	A0A1S1VJR2	Colletotrichum incanum
6	29	Uncharacterized protein	KZ112966	K445DRAFT_307938	A0A1Y2WN21	GI:1190922356|EMBL-CDS:OTB11110.1	#808080	Daldinia sp. EC12.	A0A1Y2WN21	378	A0A1Y2WN21	Daldinia sp. EC12
6	29	Uncharacterized protein	KN714708	VP1G_05406	A0A194V2G7	GI:972129390|EMBL-CDS:KUI58103.1	#808080	Valsa mali var. pyri.	A0A194V2G7	406	A0A194V2G7	Valsa mali var. pyri
6	29	Uncharacterized protein	CM003099	VM1G_02154	A0A194VQQ4	GI:972140275|EMBL-CDS:KUI66524.1	#808080	Valsa mali.	A0A194VQQ4	407	A0A194VQQ4	Valsa mali
6	29	Uncharacterized protein	MCFJ01000016	BCR38DRAFT_327089	A0A1Y2DHF0	GI:1183434353|EMBL-CDS:ORY58566.1	#808080	Pseudomassariella vexata.	A0A1Y2DHF0	236	A0A1Y2DHF0	Pseudomassariella vexata
6	29	Endoglucanase	MAVT02000985	DHEL01_v209098	A0A2P5HQI5	EMBL-CDS:POS72507.1	#808080	Diaporthe helianthi.	A0A2P5HQI5	314	A0A2P5HQI5	Diaporthe helianthi
6	29	Uncharacterized protein	KZ111523	M426DRAFT_34279	A0A1Y2WL60	GI:1190920553|EMBL-CDS:OTB09666.1	#808080	Hypoxylon sp. CI-4A.	A0A1Y2WL60	230	A0A1Y2WL60	Hypoxylon sp. CI-4A
6	29	Endoglucanase	LFIV01000049	CT0861_06798	A0A166U829	GI:1020437430|EMBL-CDS:KZL73072.1	#808080	Colletotrichum tofieldiae.	A0A166U829	440	A0A166U829	Colletotrichum tofieldiae
6	29	Uncharacterized protein	BDMC01000034	ANO14919_097820	A0A1V1THC1	EMBL-CDS:GAW20281.1	#808080	fungal sp. No.14919.	A0A1V1THC1	428	A0A1V1THC1	fungal sp. No.14919
6	29	Endoglucanase	LTAN01000008	CH063_04591	H1UW01	GI:1069506892|GI:1039266557|EMBL-CDS:CCF32152.1|EMBL-CDS:OBR04831.1|REFSEQ:XP_018153349.1	#808080	Colletotrichum higginsianum (strain IMI 349063)	H1UW01	431	H1UW01	Colletotrichum higginsianum IMI 349063
6	29	Endoglucanase	JARH01000559	CFIO01_02093	A0A010S434	GI:615458287|GI:588898243|EMBL-CDS:EXF79358.1|REFSEQ:XP_007597059.1	#808080	Colletotrichum fioriniae PJ7.	A0A010S434	400	A0A010S434	Colletotrichum fioriniae PJ7
6	29	Uncharacterized protein	LCUC01000218	UCDDA912_g05990	A0A0G2FIV3	GI:821080519|EMBL-CDS:KKY34056.1	#808080	Diaporthe ampelina.	A0A0G2FIV3	308	A0A0G2FIV3	Diaporthe ampelina
6	29	Endoglucanase	JEMN01001108	CNYM01_06076	A0A135TI78	GI:996613439|EMBL-CDS:KXH47799.1	#808080	Colletotrichum nymphaeae SA-01.	A0A135TI78	464	A0A135TI78	Colletotrichum nymphaeae SA-01
6	29	Endoglucanase	MJBS01000111	CORC01_10843	A0A1G4AXP8	GI:1088685417|EMBL-CDS:OHE93822.1	#808080	Colletotrichum orchidophilum.	A0A1G4AXP8	457	A0A1G4AXP8	Colletotrichum orchidophilum
6	29	Putative chitin-domain 3 protein	KB706518	UCREL1_5887	M7SSC5	GI:471566972|GI:629660267|EMBL-CDS:EMR67112.1|REFSEQ:XP_007793790.1	#808080	Eutypa lata (strain UCR-EL1)	M7SSC5	398	M7SSC5	Eutypa lata UCREL1
6	29	Endoglucanase	JFFI01002402	CSAL01_00416	A0A135SG37	GI:996592281|EMBL-CDS:KXH34835.1	#808080	Colletotrichum salicis.	A0A135SG37	475	A0A135SG37	Colletotrichum salicis
6	29	Uncharacterized protein	KZ112492	M434DRAFT_32295	A0A1Y2V343	GI:1190901775|EMBL-CDS:OTA91902.1	#808080	Hypoxylon sp. CO27-5.	A0A1Y2V343	375	A0A1Y2V343	Hypoxylon sp. CO27-5
6	29	Endoglucanase	JFBX01000099	CSIM01_07372	A0A135TPQ0	GI:996616220|EMBL-CDS:KXH50148.1	#808080	Colletotrichum simmondsii.	A0A135TPQ0	468	A0A135TPQ0	Colletotrichum simmondsii
6	29	Uncharacterized protein	MPGH01000011	CCHL11_02186	A0A1Q8S6V8	GI:1128271041|EMBL-CDS:OLN97101.1	#808080	Colletotrichum chlorophyti.	A0A1Q8S6V8	411	A0A1Q8S6V8	Colletotrichum chlorophyti
6	29	Endoglucanase	GG697423	GLRG_11538	E3QZX2	GI:310801517|GI:827078081|EMBL-CDS:EFQ36410.1|REFSEQ:XP_008100430.1	#808080	Colletotrichum graminicola (strain M1.001 / M2 / FGSC 10212)	E3QZX2	413	E3QZX2	Colletotrichum graminicola M1.001
6	29	Glycoside hydrolase	KB725912	Cob_00666	N4VHE9	GI:477531475|EMBL-CDS:ENH83182.1	#808080	Colletotrichum orbiculare (strain 104-T / ATCC 96160 / CBS 514.97 /LARS 414 / MAFF 240422)	N4VHE9	401	N4VHE9	Colletotrichum orbiculare MAFF 240422
6	29	Putative endoglucanase	DF977475	SAMD00023353_3000560	A0A1W2TJ80	GI:949388751|EMBL-CDS:GAP88260.2	#808080	Rosellinia necatrix	A0A1W2TJ80	398	A0A1W2TJ80	Rosellinia necatrix
6	29	Uncharacterized protein	KI912116	PFICI_11451	W3WWR3	GI:630033351|GI:573057702|EMBL-CDS:ETS77577.1|REFSEQ:XP_007838223.1	#808080	Pestalotiopsis fici (strain W106-1 / CGMCC3.15140)	W3WWR3	401	W3WWR3	Pestalotiopsis fici W106-1
6	29	Putative endoglucanase	JMSE01001468	CSUB01_08136	A0A066WZI0	GI:640915989|EMBL-CDS:KDN60824.1	#808080	Colletotrichum sublineola	A0A066WZI0	384	A0A066WZI0	Colletotrichum sublineola
6	29	Uncharacterized protein	GL876976	MAPG_09370	A0A0H2U3E1	GI:835899471|EMBL-CDS:KLU90845.1	#808080	Magnaporthiopsis poae (strain ATCC 64411 / 73-15)	A0A0H2U3E1	417	A0A0H2U3E1	Magnaporthiopsis poae ATCC 64411
6	29	Uncharacterized protein	GL385395	GGTG_02563	J3NMQ7	GI:402087692|GI:685399474|EMBL-CDS:EJT82590.1|REFSEQ:XP_009218599.1	#808080	Gaeumannomyces graminis var. tritici (strain R3-111a-1)	J3NMQ7	416	J3NMQ7	Gaeumannomyces tritici R3-111a-1
7	27	Uncharacterized protein	NKHZ01000057	CAC42_256	A0A2K1QNF1	EMBL-CDS:PNS16522.1	#00FFFF	Elsinoe sp. CQ-2017a.	A0A2K1QNF1	462	A0A2K1QNF1	Elsinoe sp. CQ-2017a
7	27	Uncharacterized protein	NAEU01000346	B0A51_08584	A0A1V8UKF7	GI:1172612796|EMBL-CDS:OQO24198.1	#00FFFF	Rachicladosporium sp. CCFEE 5018.	A0A1V8UKF7	450	A0A1V8UKF7	Rachicladosporium sp. CCFEE 5018
7	27	Uncharacterized protein	NHZQ01000419	B9Z65_1918	A0A2P7YLD0	EMBL-CDS:PSK36735.1	#00FFFF	Elsinoe australis.	A0A2P7YLD0	447	A0A2P7YLD0	Elsinoe australis
7	27	Uncharacterized protein	LKMD01000106	CB0940_09675	A0A2G5HGQ1	EMBL-CDS:PIA91766.1	#00FFFF	Cercospora beticola	A0A2G5HGQ1	368	A0A2G5HGQ1	Cercospora beticola
7	27	Uncharacterized protein	LT854260	ZT1E4_G8332	A0A2H1GT18	EMBL-CDS:SMR56735.1	#00FFFF	Zymoseptoria tritici ST99CH_1E4.	A0A2H1GT18	388	A0A2H1GT18	Zymoseptoria tritici ST99CH_1E4
7	27	Uncharacterized protein	LT854280	ZT3D1_G8219	A0A2H1H1A6	EMBL-CDS:SMR59588.1	#00FFFF	Zymoseptoria tritici ST99CH_3D1.	A0A2H1H1A6	388	A0A2H1H1A6	Zymoseptoria tritici ST99CH_3D1
7	27	Uncharacterized protein	FJUY01000012	RCC_07817	A0A2D3VIT0	EMBL-CDS:CZT21949.1	#00FFFF	Ramularia collo-cygni.	A0A2D3VIT0	363	A0A2D3VIT0	Ramularia collo-cygni
7	27	Uncharacterized protein	NAJO01000001	B0A48_00631	A0A1V8TV60	GI:1172600453|EMBL-CDS:OQO15248.1	#00FFFF	Rachicladosporium antarcticum.	A0A1V8TV60	421	A0A1V8TV60	Rachicladosporium antarcticum
7	27	Uncharacterized protein	KB446540	DOTSEDRAFT_53974	M2YM09	GI:452841114|EMBL-CDS:EME43051.1	#00FFFF	Dothistroma septosporum (strain NZE10 / CBS 128990)	M2YM09	373	M2YM09	Dothistroma septosporum NZE10
7	27	Uncharacterized protein	LAFY01000404	TI39_contig412g00024	A0A0F4GMU8	GI:796707081|EMBL-CDS:KJX98402.1	#00FFFF	Zymoseptoria brevis.	A0A0F4GMU8	396	A0A0F4GMU8	Zymoseptoria brevis
7	27	Uncharacterized protein	NAJO01000002	B0A48_00850	A0A1V8TRJ8	GI:1172599141|EMBL-CDS:OQO13975.1	#00FFFF	Rachicladosporium antarcticum.	A0A1V8TRJ8	422	A0A1V8TRJ8	Rachicladosporium antarcticum
7	27	Uncharacterized protein	LT853699	ZT3D7_G8304	A0A1X7S146	EMBL-CDS:SMQ53151.1	#00FFFF	Zymoseptoria tritici ST99CH_3D7.	A0A1X7S146	390	A0A1X7S146	Zymoseptoria tritici ST99CH_3D7
7	27	Uncharacterized protein	LT882683	ZT1A5_G8227	A0A1Y6LQX0	EMBL-CDS:SMY26783.1	#00FFFF	Zymoseptoria tritici ST99CH_1A5.	A0A1Y6LQX0	390	A0A1Y6LQX0	Zymoseptoria tritici ST99CH_1A5
7	27	Uncharacterized protein	KB445559	BAUCODRAFT_216599	M2N5B9	GI:627811213|GI:449297943|EMBL-CDS:EMC93960.1|REFSEQ:XP_007678954.1	#00FFFF	Baudoinia panamericana (strain UAMH 10762)	M2N5B9	424	M2N5B9	Baudoinia panamericana UAMH 10762
7	27	Uncharacterized protein	LFZN01000044	AC578_5058	A0A139HIP9	GI:1002206736|EMBL-CDS:KXT02257.1	#00FFFF	Mycosphaerella eumusae.	A0A139HIP9	379	A0A139HIP9	Mycosphaerella eumusae
7	27	Uncharacterized protein	LFZO01000219	AC579_4938	A0A139I944	GI:1002216072|EMBL-CDS:KXT11139.1	#00FFFF	Pseudocercospora musae.	A0A139I944	376	A0A139I944	Pseudocercospora musae
7	27	Uncharacterized protein	MVDW01000112	BST61_czeina112g000110	A0A2I0RK78	EMBL-CDS:PKR95951.1	#00FFFF	Cercospora zeina.	A0A2I0RK78	355	A0A2I0RK78	Cercospora zeina
7	27	Uncharacterized protein		CFP56_30739	A0A2P4IWA6	EMBL-CDS:POE72800.1	#00FFFF	Quercus suber	A0A2P4IWA6	447	A0A2P4IWA6	Quercus suber
7	27	Uncharacterized protein	KB446559	MYCFIDRAFT_215607	M3AYE3	GI:631386452|GI:452982429|EMBL-CDS:EME82188.1|REFSEQ:XP_007927606.1	#00FFFF	Pseudocercospora fijiensis (strain CIRAD86)	M3AYE3	390	M3AYE3	Pseudocercospora fijiensis CIRAD86
7	27	Uncharacterized protein		CFP56_30084	A0A2P4K3B8	EMBL-CDS:POE87495.1	#00FFFF	Quercus suber	A0A2P4K3B8	451	A0A2P4K3B8	Quercus suber
7	27	Uncharacterized protein	KN847533	PV09_02226	A0A0D1Z358	GI:759230407|GI:1022785913|EMBL-CDS:KIW07382.1|REFSEQ:XP_016217251.1	#00FFFF	Verruconis gallopava.	A0A0D1Z358	421	A0A0D1Z358	Verruconis gallopava
7	27	Uncharacterized protein	DF938582	ANO11243_020070	A0A0S6XC04	GI:752280334|EMBL-CDS:GAM84016.1	#00FFFF	fungal sp. No.11243.	A0A0S6XC04	423	A0A0S6XC04	fungal sp. No.11243
7	27	Uncharacterized protein	MUNK01000103	BTJ68_08814	A0A1Z5T7E0	GI:1190786615|EMBL-CDS:OTA31947.1	#00FFFF	Hortaea werneckii EXF-2000.	A0A1Z5T7E0	404	A0A1Z5T7E0	Hortaea werneckii EXF-2000
7	27	Uncharacterized protein	KB456265	SEPMUDRAFT_10541	N1QGL6	GI:1030136235|GI:453083574|EMBL-CDS:EMF11619.1|REFSEQ:XP_016759740.1	#00FFFF	Sphaerulina musiva (strain SO2202)	N1QGL6	205	N1QGL6	Sphaerulina musiva SO2202
7	27	Uncharacterized protein	KL584982	M438DRAFT_273391	A0A074XGX7	GI:662527308|EMBL-CDS:KEQ84688.1	#00FFFF	Aureobasidium pullulans EXF-150.	A0A074XGX7	190	A0A074XGX7	Aureobasidium pullulans EXF-150
7	27	Uncharacterized protein	MUNK01000175	BTJ68_10770	A0A1Z5SZN7	GI:1190782304|EMBL-CDS:OTA27755.1	#00FFFF	Hortaea werneckii EXF-2000.	A0A1Z5SZN7	407	A0A1Z5SZN7	Hortaea werneckii EXF-2000
7	27	Uncharacterized protein	CM001203	MYCGRDRAFT_46444	F9XGU1	GI:339470355|GI:398394036|EMBL-CDS:EGP85453.1|REFSEQ:XP_003850477.1	#00FFFF	Zymoseptoria tritici (strain CBS 115943 / IPO323)	F9XGU1	175	F9XGU1	Zymoseptoria tritici IPO323
8	25	Uncharacterized protein	MCFE01000070	K493DRAFT_209738	A0A1Y1YTL2	GI:1183375776|EMBL-CDS:ORY01380.1	#FFC0CB	Basidiobolus meristosporus CBS 931.73.	A0A1Y1YTL2	186	A0A1Y1YTL2	Basidiobolus meristosporus CBS 931.73
8	25	Uncharacterized protein	MCFE01000063	K493DRAFT_312233	A0A1Y1YW79	GI:1183376375|EMBL-CDS:ORY01957.1	#FFC0CB	Basidiobolus meristosporus CBS 931.73.	A0A1Y1YW79	320	A0A1Y1YW79	Basidiobolus meristosporus CBS 931.73
8	25	Uncharacterized protein	MCFE01000063	K493DRAFT_298154	A0A1Y1YV99	GI:1183376376|EMBL-CDS:ORY01958.1	#FFC0CB	Basidiobolus meristosporus CBS 931.73.	A0A1Y1YV99	325	A0A1Y1YV99	Basidiobolus meristosporus CBS 931.73
8	25	Uncharacterized protein	MCFE01000565	K493DRAFT_319760	A0A1Y1XLT4	GI:1183359291|EMBL-CDS:ORX86720.1	#FFC0CB	Basidiobolus meristosporus CBS 931.73.	A0A1Y1XLT4	371	A0A1Y1XLT4	Basidiobolus meristosporus CBS 931.73
8	25	Uncharacterized protein	MCFE01000028	K493DRAFT_161077	A0A1Y1Z4G4	GI:1183379618|EMBL-CDS:ORY05086.1	#FFC0CB	Basidiobolus meristosporus CBS 931.73.	A0A1Y1Z4G4	163	A0A1Y1Z4G4	Basidiobolus meristosporus CBS 931.73
8	25	Uncharacterized protein	MCFE01000249	K493DRAFT_224181	A0A1Y1Y510	GI:1183366842|EMBL-CDS:ORX93068.1	#FFC0CB	Basidiobolus meristosporus CBS 931.73.	A0A1Y1Y510	289	A0A1Y1Y510	Basidiobolus meristosporus CBS 931.73
8	25	Uncharacterized protein	MCFE01000616	K493DRAFT_320145	A0A1Y1XEQ1	GI:1183356614|GI:1183356613|EMBL-CDS:ORX84215.1|EMBL-CDS:ORX84216.1	#FFC0CB	Basidiobolus meristosporus CBS 931.73.	A0A1Y1XEQ1	317	A0A1Y1XEQ1	Basidiobolus meristosporus CBS 931.73
8	25	Putative endoglucanase	MCFE01000058	K493DRAFT_159796	A0A1Y1YWD5	GI:1183376746|EMBL-CDS:ORY02311.1	#FFC0CB	Basidiobolus meristosporus CBS 931.73.	A0A1Y1YWD5	167	A0A1Y1YWD5	Basidiobolus meristosporus CBS 931.73
8	25	Uncharacterized protein	MCFE01000443	K493DRAFT_318664	A0A1Y1XUN7	GI:1183362445|EMBL-CDS:ORX89433.1	#FFC0CB	Basidiobolus meristosporus CBS 931.73.	A0A1Y1XUN7	319	A0A1Y1XUN7	Basidiobolus meristosporus CBS 931.73
8	25	Uncharacterized protein	MCFE01000338	K493DRAFT_143849	A0A1Y1XZI6	GI:1183364570|EMBL-CDS:ORX91149.1	#FFC0CB	Basidiobolus meristosporus CBS 931.73.	A0A1Y1XZI6	165	A0A1Y1XZI6	Basidiobolus meristosporus CBS 931.73
8	25	Uncharacterized protein	MCFE01000103	K493DRAFT_313382	A0A1Y1YM50	GI:1183373353|EMBL-CDS:ORX99071.1	#FFC0CB	Basidiobolus meristosporus CBS 931.73.	A0A1Y1YM50	312	A0A1Y1YM50	Basidiobolus meristosporus CBS 931.73
8	25	Uncharacterized protein	MCFE01000107	K493DRAFT_257904	A0A1Y1YM25	GI:1183373076|EMBL-CDS:ORX98806.1	#FFC0CB	Basidiobolus meristosporus CBS 931.73.	A0A1Y1YM25	314	A0A1Y1YM25	Basidiobolus meristosporus CBS 931.73
8	25	Uncharacterized protein	MCFE01000107	K493DRAFT_213751	A0A1Y1YLD5	GI:1183373075|EMBL-CDS:ORX98805.1	#FFC0CB	Basidiobolus meristosporus CBS 931.73.	A0A1Y1YLD5	307	A0A1Y1YLD5	Basidiobolus meristosporus CBS 931.73
8	25	Uncharacterized protein	MCFE01000017	K493DRAFT_310658	A0A1Y1Z7T9	GI:1183380900|EMBL-CDS:ORY06332.1	#FFC0CB	Basidiobolus meristosporus CBS 931.73.	A0A1Y1Z7T9	284	A0A1Y1Z7T9	Basidiobolus meristosporus CBS 931.73
8	25	Uncharacterized protein	MCFE01000312	K493DRAFT_166756	A0A1Y1Y118	GI:1183365201|EMBL-CDS:ORX91668.1	#FFC0CB	Basidiobolus meristosporus CBS 931.73.	A0A1Y1Y118	133	A0A1Y1Y118	Basidiobolus meristosporus CBS 931.73
8	25	Uncharacterized protein	MCFE01000456	K493DRAFT_140280	A0A1Y1XU98	GI:1183362287|EMBL-CDS:ORX89320.1	#FFC0CB	Basidiobolus meristosporus CBS 931.73.	A0A1Y1XU98	162	A0A1Y1XU98	Basidiobolus meristosporus CBS 931.73
8	25	Putative endoglucanase	MCFE01000076	K493DRAFT_157363	A0A1Y1YSD9	GI:1183375317|EMBL-CDS:ORY00942.1	#FFC0CB	Basidiobolus meristosporus CBS 931.73.	A0A1Y1YSD9	165	A0A1Y1YSD9	Basidiobolus meristosporus CBS 931.73
8	25	Uncharacterized protein	MCFE01000324	K493DRAFT_149391	A0A1Y1Y091	GI:1183364859|EMBL-CDS:ORX91389.1	#FFC0CB	Basidiobolus meristosporus CBS 931.73.	A0A1Y1Y091	162	A0A1Y1Y091	Basidiobolus meristosporus CBS 931.73
8	25	Uncharacterized protein	MCFE01000324	K493DRAFT_304119	A0A1Y1Y055	GI:1183364860|EMBL-CDS:ORX91390.1	#FFC0CB	Basidiobolus meristosporus CBS 931.73.	A0A1Y1Y055	274	A0A1Y1Y055	Basidiobolus meristosporus CBS 931.73
8	25	Uncharacterized protein	MCFE01000737	K493DRAFT_131130	A0A1Y1X3W8	GI:1183352536|EMBL-CDS:ORX80507.1	#FFC0CB	Basidiobolus meristosporus CBS 931.73.	A0A1Y1X3W8	160	A0A1Y1X3W8	Basidiobolus meristosporus CBS 931.73
8	25	Putative endoglucanase	MCFE01000178	K493DRAFT_144605	A0A1Y1YBK8	GI:1183369396|EMBL-CDS:ORX95368.1	#FFC0CB	Basidiobolus meristosporus CBS 931.73.	A0A1Y1YBK8	163	A0A1Y1YBK8	Basidiobolus meristosporus CBS 931.73
8	25	Uncharacterized protein	MCFE01000613	K493DRAFT_360723	A0A1Y1XF48	GI:1183356762|EMBL-CDS:ORX84353.1	#FFC0CB	Basidiobolus meristosporus CBS 931.73.	A0A1Y1XF48	202	A0A1Y1XF48	Basidiobolus meristosporus CBS 931.73
8	25	Uncharacterized protein	MCFE01000640	K493DRAFT_140519	A0A1Y1XCR5	GI:1183355836|EMBL-CDS:ORX83507.1	#FFC0CB	Basidiobolus meristosporus CBS 931.73.	A0A1Y1XCR5	162	A0A1Y1XCR5	Basidiobolus meristosporus CBS 931.73
8	25	Putative endoglucanase	MCFE01000183	K493DRAFT_139594	A0A1Y1YB79	GI:1183369204|EMBL-CDS:ORX95193.1	#FFC0CB	Basidiobolus meristosporus CBS 931.73.	A0A1Y1YB79	162	A0A1Y1YB79	Basidiobolus meristosporus CBS 931.73
8	25	Putative endoglucanase	MCFE01000286	K493DRAFT_146143	A0A1Y1Y3U7	GI:1183365898|EMBL-CDS:ORX92264.1	#FFC0CB	Basidiobolus meristosporus CBS 931.73.	A0A1Y1Y3U7	162	A0A1Y1Y3U7	Basidiobolus meristosporus CBS 931.73
9	24	Putative dna-directed rna polymerase	LCUC01000068	UCDDA912_g02229	A0A0G2FV60	GI:821084407|EMBL-CDS:KKY37794.1	#FF69B4	Diaporthe ampelina.	A0A0G2FV60	399	A0A0G2FV60	Diaporthe ampelina
9	24	Uncharacterized protein	MCFJ01000019	BCR38DRAFT_354325	A0A1Y2DDT7	GI:1183433206|EMBL-CDS:ORY57428.1	#FF69B4	Pseudomassariella vexata.	A0A1Y2DDT7	382	A0A1Y2DDT7	Pseudomassariella vexata
9	24	Dna-directed rna polymerase	KE148146	F503_05957	S3CD57	GI:512195106|EMBL-CDS:EPE10862.1	#FF69B4	Ophiostoma piceae (strain UAMH 11346)	S3CD57	449	S3CD57	Ophiostoma piceae UAMH 11346
9	24	Putative dna-directed rna polymerase protein	KB706129	UCREL1_3862	M7SRN2	GI:629652565|GI:471569843|EMBL-CDS:EMR69119.1|REFSEQ:XP_007791795.1	#FF69B4	Eutypa lata (strain UCR-EL1)	M7SRN2	378	M7SRN2	Eutypa lata UCREL1
9	24	Putative dna-directed rna polymerase protein	KB706154	UCREL1_4074	M7TG14	GI:471569568|GI:629653355|EMBL-CDS:EMR68901.1|REFSEQ:XP_007792003.1	#FF69B4	Eutypa lata (strain UCR-EL1)	M7TG14	393	M7TG14	Eutypa lata UCREL1
9	24	Uncharacterized protein	KZ112927	K445DRAFT_43751	A0A1Y2XFL4	GI:1190932007|EMBL-CDS:OTB20722.1	#FF69B4	Daldinia sp. EC12.	A0A1Y2XFL4	351	A0A1Y2XFL4	Daldinia sp. EC12
9	24	Lytic polysaccharide monooxygenase	KZ111249	K449DRAFT_444791	A0A1Y2TT86	GI:1190869781|EMBL-CDS:OTA61833.1	#FF69B4	Hypoxylon sp. EC38.	A0A1Y2TT86	403	A0A1Y2TT86	Hypoxylon sp. EC38
9	24	Uncharacterized protein	KZ111634	M426DRAFT_33109	A0A1Y2VNP6	GI:1190909890|EMBL-CDS:OTA99113.1	#FF69B4	Hypoxylon sp. CI-4A.	A0A1Y2VNP6	228	A0A1Y2VNP6	Hypoxylon sp. CI-4A
9	24	Uncharacterized protein	AXCR01000004	SPSK_07563	A0A0F2MGY6	GI:1026951759|GI:780598361|EMBL-CDS:KJR88907.1|REFSEQ:XP_016591583.1	#FF69B4	Sporothrix schenckii 1099-18.	A0A0F2MGY6	441	A0A0F2MGY6	Sporothrix schenckii 1099-18
9	24	Uncharacterized protein	KI440843	HMPREF1624_02928	U7Q4N7	GI:550809763|EMBL-CDS:ERT01676.1	#FF69B4	Sporothrix schenckii (strain ATCC 58251 / de Perez 2211183)	U7Q4N7	441	U7Q4N7	Sporothrix schenckii ATCC 58251
9	24	Uncharacterized protein	KI912118	PFICI_12514	W3WNS3	GI:573055659|GI:630036174|EMBL-CDS:ETS75570.1|REFSEQ:XP_007839286.1	#FF69B4	Pestalotiopsis fici (strain W106-1 / CGMCC3.15140)	W3WNS3	401	W3WNS3	Pestalotiopsis fici W106-1
9	24	Uncharacterized protein	AWTV01000006	SPBR_02843	A0A0C2F2Q5	GI:748542845|EMBL-CDS:KIH93149.1	#FF69B4	Sporothrix brasiliensis 5110.	A0A0C2F2Q5	441	A0A0C2F2Q5	Sporothrix brasiliensis 5110
9	24	Uncharacterized protein	KZ112700	M434DRAFT_38353	A0A1Y2UC99	GI:1190888297|EMBL-CDS:OTA79295.1	#FF69B4	Hypoxylon sp. CO27-5.	A0A1Y2UC99	411	A0A1Y2UC99	Hypoxylon sp. CO27-5
9	24	Uncharacterized protein	GL629997	CMQ_5494	F0XT02	GI:930136300|GI:320586403|EMBL-CDS:EFW99073.1|REFSEQ:XP_014168556.1	#FF69B4	Grosmannia clavigera (strain kw1407 / UAMH 11150)	F0XT02	402	F0XT02	Grosmannia clavigera kw1407
9	24	Uncharacterized protein	CM003102	VM1G_05323	A0A194VZW4	GI:972143505|EMBL-CDS:KUI69754.1	#FF69B4	Valsa mali.	A0A194VZW4	520	A0A194VZW4	Valsa mali
9	24	Uncharacterized protein	BDMC01000032	ANO14919_094880	A0A1V1TGX9	EMBL-CDS:GAW19994.1	#FF69B4	fungal sp. No.14919.	A0A1V1TGX9	434	A0A1V1TGX9	fungal sp. No.14919
9	24	Uncharacterized protein	AZHD01000001	SPI_00478	A0A168A5R7	GI:1025680977|EMBL-CDS:OAA68283.1	#FF69B4	Sporothrix insectorum RCEF 264.	A0A168A5R7	466	A0A168A5R7	Sporothrix insectorum RCEF 264
9	24	Uncharacterized protein	KN714682	VP1G_03013	A0A194UVK5	GI:972126811|EMBL-CDS:KUI55646.1	#FF69B4	Valsa mali var. pyri.	A0A194UVK5	514	A0A194UVK5	Valsa mali var. pyri
9	24	Uncharacterized protein	KN714826	VP1G_09788	A0A194VF91	GI:972134313|EMBL-CDS:KUI62682.1	#FF69B4	Valsa mali var. pyri.	A0A194VF91	394	A0A194VF91	Valsa mali var. pyri
9	24	Uncharacterized protein	CM003106	VM1G_08601	A0A194W958	GI:972146578|EMBL-CDS:KUI72827.1	#FF69B4	Valsa mali.	A0A194W958	401	A0A194W958	Valsa mali
9	24	Uncharacterized protein	MAVT02002557	DHEL01_v212410	A0A2P5HG17	EMBL-CDS:POS69196.1	#FF69B4	Diaporthe helianthi.	A0A2P5HG17	506	A0A2P5HG17	Diaporthe helianthi
9	24	Putative glycoside hydrolase	LCUC01000345	UCDDA912_g07974	A0A0G2FD42	GI:821078407|EMBL-CDS:KKY32071.1	#FF69B4	Diaporthe ampelina.	A0A0G2FD42	381	A0A0G2FD42	Diaporthe ampelina
9	24	Uncharacterized protein	MAVT02002701	DHEL01_v212521	A0A2P5HFS0	EMBL-CDS:POS69085.1	#FF69B4	Diaporthe helianthi.	A0A2P5HFS0	402	A0A2P5HFS0	Diaporthe helianthi
9	24	Uncharacterized protein	KQ964246	Micbo1qcDRAFT_217333	A0A136JEP4	GI:1000226619|EMBL-CDS:KXJ95620.1	#FF69B4	Microdochium bolleyi.	A0A136JEP4	463	A0A136JEP4	Microdochium bolleyi
10	23	Uncharacterized protein	KI894010	I206_03723	A0A1B9I4F5	GI:1101828101|GI:1045456928|EMBL-CDS:OCF50402.1|REFSEQ:XP_019011621.1	#808000	Kwoniella pini CBS 10737.	A0A1B9I4F5	379	A0A1B9I4F5	Kwoniella pini CBS 10737
10	23	Uncharacterized protein	KI894023	I302_06774	A0A1B9FYG0	GI:1102541459|GI:1045429440|EMBL-CDS:OCF23790.1|REFSEQ:XP_019044860.1	#808000	Kwoniella bestiolae CBS 10118.	A0A1B9FYG0	378	A0A1B9FYG0	Kwoniella bestiolae CBS 10118
10	23	Uncharacterized protein	KI669463	L486_05063	A0A1B9IQB9	GI:1045464634|EMBL-CDS:OCF57604.1	#808000	Kwoniella mangroviensis CBS 10435.	A0A1B9IQB9	373	A0A1B9IQB9	Kwoniella mangroviensis CBS 10435
10	23	Uncharacterized protein	AWGJ01000002	L202_01757	A0A1E3I4U4	GI:1101784501|GI:1062136942|EMBL-CDS:ODN83660.1|REFSEQ:XP_018997660.1	#808000	Cryptococcus amylolentus CBS 6039.	A0A1E3I4U4	436	A0A1E3I4U4	Cryptococcus amylolentus CBS 6039
10	23	Uncharacterized protein	MEKH01000002	I350_01739	A0A1E3KDU5	GI:1062164543|EMBL-CDS:ODO11136.1	#808000	Cryptococcus amylolentus CBS 6273.	A0A1E3KDU5	436	A0A1E3KDU5	Cryptococcus amylolentus CBS 6273
10	23	Uncharacterized protein	KI894033	I303_06074	A0A1A6A149	GI:1069908608|GI:1039709927|EMBL-CDS:OBR83791.1|REFSEQ:XP_018261633.1	#808000	Kwoniella dejecticola CBS 10117.	A0A1A6A149	305	A0A1A6A149	Kwoniella dejecticola CBS 10117
10	23	Uncharacterized protein	KV700129	I316_05655	A0A1B9GNQ0	GI:1045438519|EMBL-CDS:OCF32734.1	#808000	Kwoniella heveanensis BCC8398.	A0A1B9GNQ0	423	A0A1B9GNQ0	Kwoniella heveanensis BCC8398
10	23	Uncharacterized protein	AWGH01000020	L198_06105	A0A1E3IQH7	GI:1102232682|GI:1062144136|EMBL-CDS:ODN90788.1|REFSEQ:XP_019029890.1	#808000	Tsuchiyaea wingfieldii CBS 7118.	A0A1E3IQH7	432	A0A1E3IQH7	Tsuchiyaea wingfieldii CBS 7118
10	23	Uncharacterized protein	AMKX01000317	C356_04536	A0A225Y769	GI:1214801082|EMBL-CDS:OWZ37762.1	#808000	Cryptococcus neoformans var. grubii c45.	A0A225Y769	417	A0A225Y769	Cryptococcus neoformans var. grubii c45
10	23	Uncharacterized protein	KI669522	I317_02098	A0A1B9HL21	GI:1045450362|EMBL-CDS:OCF43992.1	#808000	Kwoniella heveanensis CBS 569.	A0A1B9HL21	423	A0A1B9HL21	Kwoniella heveanensis CBS 569
10	23	Uncharacterized protein	AMKP01000022	C365_04361	A0A226BE71	GI:1214842931|EMBL-CDS:OWZ77102.1	#808000	Cryptococcus neoformans var. grubii Bt85.	A0A226BE71	417	A0A226BE71	Cryptococcus neoformans var. grubii Bt85
10	23	Uncharacterized protein	CP003827	CNAG_03405	J9VQT7	GI:799336350|GI:405121860|EMBL-CDS:AFR96628.1|REFSEQ:XP_012051237.1	#808000	Cryptococcus neoformans var. grubii serotype A (strain H99 / ATCC208821 / CBS 10515 / FGSC 9487)	J9VQT7	417	J9VQT7	Cryptococcus neoformans var. grubii H99
10	23	Uncharacterized protein	KQ410561	CNBG_2203	A0A095C6I2	GI:686624631|EMBL-CDS:KGB76365.1	#808000	Cryptococcus gattii serotype B (strain R265)	A0A095C6I2	329	A0A095C6I2	Cryptococcus gattii VGII R265
10	23	Unplaced genomic scaffold supercont1.4| whole genome shotgun sequence	KN847899	I313_02022	A0A0D0T7D2	GI:757335837|EMBL-CDS:KIR41862.1	#808000	Cryptococcus gattii VGII Ram5.	A0A0D0T7D2	329	A0A0D0T7D2	Cryptococcus gattii VGII Ram5
10	23	Uncharacterized protein	AWGK01000018	L203_04267	A0A1E3IC21	GI:1062139454|EMBL-CDS:ODN86149.1	#808000	Cryptococcus depauperatus CBS 7841.	A0A1E3IC21	359	A0A1E3IC21	Cryptococcus depauperatus CBS 7841
10	23	Uncharacterized protein	AWGL01000011	L204_04628	A0A1E3J1F6	GI:1062147859|EMBL-CDS:ODN94495.1	#808000	Cryptococcus depauperatus CBS 7855.	A0A1E3J1F6	359	A0A1E3J1F6	Cryptococcus depauperatus CBS 7855
10	23	Unplaced genomic scaffold supercont1.201| whole genome shotgun sequence	KN848749	I306_05351	A0A0D0Y8E9	GI:757371902|EMBL-CDS:KIR77615.1	#808000	Cryptococcus gattii EJB2.	A0A0D0Y8E9	303	A0A0D0Y8E9	Cryptococcus gattii EJB2
10	23	Unplaced genomic scaffold supercont2.2| whole genome shotgun sequence	KN848856	I308_00902	A0A0D0YZZ8	GI:757383477|EMBL-CDS:KIR88821.1	#808000	Cryptococcus gattii VGIV IND107.	A0A0D0YZZ8	302	A0A0D0YZZ8	Cryptococcus gattii VGIV IND107
10	23	Uncharacterized protein	CP000292	CGB_G4290C	E6R9M7	GI:321261247|GI:317461816|EMBL-CDS:ADV23556.1|REFSEQ:XP_003195343.1	#808000	Cryptococcus gattii serotype B (strain WM276 / ATCC MYA-4071)	E6R9M7	303	E6R9M7	Cryptococcus gattii WM276
10	23	Uncharacterized protein	AAEY01000038	CNBG3000	Q55PB2	GI:134114143|GI:50256954|EMBL-CDS:EAL19672.1|REFSEQ:XP_774319.1	#808000	Cryptococcus neoformans var. neoformans serotype D (strain B-3501A)	Q55PB2	428	Q55PB2	Cryptococcus neoformans var. neoformans B-3501A
10	23	Uncharacterized protein	AE017347	CNG01780	Q5KE44	GI:57228145|GI:58269506|EMBL-CDS:AAW44602.1|REFSEQ:XP_571909.1	#808000	Cryptococcus neoformans var. neoformans serotype D (strain JEC21 /ATCC MYA-565)	Q5KE44	428	Q5KE44	Cryptococcus neoformans var. neoformans JEC21
10	23	Uncharacterized protein	MCFC01000001	BCR39DRAFT_460379	A0A1Y2BLQ2	GI:1183411209|EMBL-CDS:ORY35689.1	#808000	Naematelia encephala.	A0A1Y2BLQ2	273	A0A1Y2BLQ2	Naematelia encephala
10	23	Uncharacterized protein	NBSH01000004	BD324DRAFT_578018	A0A1Y1UMI7	GI:1183308165|EMBL-CDS:ORX38345.1	#808000	Kockovaella imperatae.	A0A1Y1UMI7	343	A0A1Y1UMI7	Kockovaella imperatae
11	18	Uncharacterized protein	JPKE01001797	V502_04584	A0A094IAL8	GI:682461255|EMBL-CDS:KFZ17481.1	#FA8072	Pseudogymnoascus sp. VKM F-4520	A0A094IAL8	457	A0A094IAL8	Pseudogymnoascus sp. VKM F-4520 (FW-2644)
11	18	Uncharacterized protein	JPJY01000310	V496_02129	A0A094G316	GI:682383936|EMBL-CDS:KFY66252.1	#FA8072	Pseudogymnoascus sp. VKM F-4515	A0A094G316	270	A0A094G316	Pseudogymnoascus sp. VKM F-4515 (FW-2607)
11	18	Uncharacterized protein	FJOG01000030	PAC_15208	A0A1L7XJW8	EMBL-CDS:CZR65308.1	#FA8072	Phialocephala subalpina.	A0A1L7XJW8	291	A0A1L7XJW8	Phialocephala subalpina
11	18	Uncharacterized protein	FJOG01000002	PAC_01984	A0A1L7WH98	EMBL-CDS:CZR52107.1	#FA8072	Phialocephala subalpina.	A0A1L7WH98	234	A0A1L7WH98	Phialocephala subalpina
11	18	Uncharacterized protein	JH767576	W97_05088	R7YVZ3	GI:494829116|GI:667833988|EMBL-CDS:EON65846.1|REFSEQ:XP_007781163.1	#FA8072	Coniosporium apollinis (strain CBS 100218)	R7YVZ3	303	R7YVZ3	Coniosporium apollinis CBS 100218
11	18	Uncharacterized protein	KB445640	COCSADRAFT_24530	M2TC61	GI:451853123|GI:628064253|EMBL-CDS:EMD66417.1|REFSEQ:XP_007697441.1	#FA8072	Cochliobolus sativus (strain ND90Pr / ATCC 201652)	M2TC61	330	M2TC61	Bipolaris sorokiniana ND90Pr
11	18	Uncharacterized protein	KB445570	COCHEDRAFT_1046206	M2UCV3	GI:451992330|GI:452003912|EMBL-CDS:EMD84831.1|EMBL-CDS:EMD96369.1	#FA8072	Cochliobolus heterostrophus (strain C5 / ATCC 48332 / race O)	M2UCV3	122	M2UCV3	Bipolaris maydis C5
11	18	Uncharacterized protein	KB733494	COCC4DRAFT_92460	N4WFB0	GI:477581840|GI:928508147|EMBL-CDS:ENH98958.1|REFSEQ:XP_014072877.1	#FA8072	Cochliobolus heterostrophus (strain C4 / ATCC 48331 / race T)	N4WFB0	122	N4WFB0	Bipolaris maydis ATCC 48331
11	18	Uncharacterized protein	JYNV01000296	ST47_g9565	A0A162WZY8	GI:1020698418|EMBL-CDS:KZM19289.1	#FA8072	Didymella rabiei	A0A162WZY8	332	A0A162WZY8	Ascochyta rabiei
11	18	Lytic polysaccharide monooxygenase	KI968828	COCVIDRAFT_42199	W7ECK7	GI:953418831|GI:578484381|EMBL-CDS:EUN21907.1|REFSEQ:XP_014551487.1	#FA8072	Bipolaris victoriae FI3.	W7ECK7	285	W7ECK7	Bipolaris victoriae FI3
11	18	Uncharacterized protein	KB445641	COCSADRAFT_48501	M2SET5	GI:628067444|GI:451852518|EMBL-CDS:EMD65813.1|REFSEQ:XP_007698450.1	#FA8072	Cochliobolus sativus (strain ND90Pr / ATCC 201652)	M2SET5	123	M2SET5	Bipolaris sorokiniana ND90Pr
11	18	Uncharacterized protein	KB908482	SETTUDRAFT_36346	R0KSQ9	GI:482814164|GI:636579901|EMBL-CDS:EOA90842.1|REFSEQ:XP_008021289.1	#FA8072	Setosphaeria turcica (strain 28A)	R0KSQ9	287	R0KSQ9	Exserohilum turcica Et28A
11	18	Lytic polysaccharide monooxygenase	KI965116	COCCADRAFT_10408	W6XNI3	GI:576912126|GI:628246631|EMBL-CDS:EUC26810.1|REFSEQ:XP_007718883.1	#FA8072	Bipolaris zeicola 26-R-13.	W6XNI3	248	W6XNI3	Bipolaris zeicola 26-R-13
11	18	Uncharacterized protein	KB908814	SETTUDRAFT_61484	R0JS32	GI:636593707|GI:482806871|EMBL-CDS:EOA83923.1|REFSEQ:XP_008028192.1	#FA8072	Setosphaeria turcica (strain 28A)	R0JS32	122	R0JS32	Exserohilum turcica Et28A
11	18	Lytic polysaccharide monooxygenase	KI964170	COCMIDRAFT_30669	W6YXT5	GI:576926636|GI:627920831|EMBL-CDS:EUC40374.1|REFSEQ:XP_007693097.1	#FA8072	Bipolaris oryzae ATCC 44560.	W6YXT5	220	W6YXT5	Bipolaris oryzae ATCC 44560
11	18	Uncharacterized protein	KB445587	COCHEDRAFT_1038311	M2UCA6	GI:451993159|EMBL-CDS:EMD85633.1	#FA8072	Cochliobolus heterostrophus (strain C5 / ATCC 48332 / race O)	M2UCA6	124	M2UCA6	Bipolaris maydis C5
11	18	Uncharacterized protein	KB733492	COCC4DRAFT_95266	N4WXK8	GI:477581949|GI:928508345|EMBL-CDS:ENH99065.1|REFSEQ:XP_014072976.1	#FA8072	Cochliobolus heterostrophus (strain C4 / ATCC 48331 / race T)	N4WXK8	124	N4WXK8	Bipolaris maydis ATCC 48331
11	18	Uncharacterized protein	KV441637	IQ07DRAFT_660626	A0A178EK18	GI:1029191595|EMBL-CDS:OAL56154.1	#FA8072	Pyrenochaeta sp. DS3sAY3a.	A0A178EK18	317	A0A178EK18	Pyrenochaeta sp. DS3sAY3a
12	16	Uncharacterized protein	KB908814	SETTUDRAFT_92647	R0IFU3	GI:482806869|GI:636594061|EMBL-CDS:EOA83921.1|REFSEQ:XP_008028369.1	#EE82EE	Setosphaeria turcica (strain 28A)	R0IFU3	344	R0IFU3	Exserohilum turcica Et28A
12	16	Lytic polysaccharide monooxygenase	KI964137	COCMIDRAFT_40918	W6YT94	GI:627919553|GI:576927120|EMBL-CDS:EUC40825.1|REFSEQ:XP_007692672.1	#EE82EE	Bipolaris oryzae ATCC 44560.	W6YT94	327	W6YT94	Bipolaris oryzae ATCC 44560
12	16	Uncharacterized protein	KB908626	SETTUDRAFT_110770	R0KCJ7	GI:482809084|GI:636590301|EMBL-CDS:EOA85932.1|REFSEQ:XP_008026489.1	#EE82EE	Setosphaeria turcica (strain 28A)	R0KCJ7	315	R0KCJ7	Exserohilum turcica Et28A
12	16	Lytic polysaccharide monooxygenase	KI968880	COCVIDRAFT_115435	W7E9X2	GI:578483299|GI:953416759|EMBL-CDS:EUN20877.1|REFSEQ:XP_014550451.1	#EE82EE	Bipolaris victoriae FI3.	W7E9X2	344	W7E9X2	Bipolaris victoriae FI3
12	16	Uncharacterized protein	KB445641	COCSADRAFT_355161	M2SU39	GI:451852515|GI:628068405|EMBL-CDS:EMD65810.1|REFSEQ:XP_007698856.1	#EE82EE	Cochliobolus sativus (strain ND90Pr / ATCC 201652)	M2SU39	267	M2SU39	Bipolaris sorokiniana ND90Pr
12	16	Uncharacterized protein	KB908482	SETTUDRAFT_101501	R0J1J0	GI:482814172|GI:636580463|EMBL-CDS:EOA90850.1|REFSEQ:XP_008021570.1	#EE82EE	Setosphaeria turcica (strain 28A)	R0J1J0	345	R0J1J0	Exserohilum turcica Et28A
12	16	Uncharacterized protein	KB733492	COCC4DRAFT_66801	N4WIL2	GI:928508325|GI:477581943|EMBL-CDS:ENH99059.1|REFSEQ:XP_014072966.1	#EE82EE	Cochliobolus heterostrophus (strain C4 / ATCC 48331 / race T)	N4WIL2	308	N4WIL2	Bipolaris maydis ATCC 48331
12	16	Uncharacterized protein	KV441707	IQ06DRAFT_323878	A0A178B4M1	GI:1028902717|EMBL-CDS:OAL04967.1	#EE82EE	Stagonospora sp. SRC1lsM3a.	A0A178B4M1	398	A0A178B4M1	Stagonospora sp. SRC1lsM3a
12	16	Uncharacterized protein	JYNV01000296	ST47_g9566	A0A162WZU6	GI:1020698415|EMBL-CDS:KZM19286.1	#EE82EE	Didymella rabiei	A0A162WZU6	326	A0A162WZU6	Ascochyta rabiei
12	16	Uncharacterized protein	KB445640	COCSADRAFT_84949	M2SVU4	GI:451853126|GI:628065763|EMBL-CDS:EMD66420.1|REFSEQ:XP_007697919.1	#EE82EE	Cochliobolus sativus (strain ND90Pr / ATCC 201652)	M2SVU4	267	M2SVU4	Bipolaris sorokiniana ND90Pr
12	16	Uncharacterized protein	KB445584	COCHEDRAFT_22861	M2UFC2	GI:451994141|EMBL-CDS:EMD86612.1	#EE82EE	Cochliobolus heterostrophus (strain C5 / ATCC 48332 / race O)	M2UFC2	270	M2UFC2	Bipolaris maydis C5
12	16	Uncharacterized protein	KB445570	COCHEDRAFT_1121170	M2V8T4	GI:451992333|GI:452003915|EMBL-CDS:EMD84834.1|EMBL-CDS:EMD96372.1	#EE82EE	Cochliobolus heterostrophus (strain C5 / ATCC 48332 / race O)	M2V8T4	344	M2V8T4	Bipolaris maydis C5
12	16	Uncharacterized protein	KB733461	COCC4DRAFT_62842	N4X919	GI:928516256|GI:477585930|EMBL-CDS:ENI03016.1|REFSEQ:XP_014076925.1	#EE82EE	Cochliobolus heterostrophus (strain C4 / ATCC 48331 / race T)	N4X919	270	N4X919	Bipolaris maydis ATCC 48331
12	16	Uncharacterized protein	KB445587	COCHEDRAFT_75573	M2UCI5	GI:451993153|EMBL-CDS:EMD85627.1	#EE82EE	Cochliobolus heterostrophus (strain C5 / ATCC 48332 / race O)	M2UCI5	345	M2UCI5	Bipolaris maydis C5
12	16	Uncharacterized protein	KV441662	IQ07DRAFT_248702	A0A178DLG8	GI:1029179751|EMBL-CDS:OAL44335.1	#EE82EE	Pyrenochaeta sp. DS3sAY3a.	A0A178DLG8	419	A0A178DLG8	Pyrenochaeta sp. DS3sAY3a
12	16	Uncharacterized protein	KV441520	CC77DRAFT_899745	A0A177D205	GI:1070566206|GI:1027152804|EMBL-CDS:OAG13222.1|REFSEQ:XP_018378643.1	#EE82EE	Alternaria alternata	A0A177D205	337	A0A177D205	Alternaria alternata
13	13	Uncharacterized protein	MVNX01000046	BUE80_DR005430	A0A2H3FEE5	EMBL-CDS:PBP23819.1	#006400	Diplocarpon rosae.	A0A2H3FEE5	341	A0A2H3FEE5	Diplocarpon rosae
13	13	Uncharacterized protein	LCUC01000066	UCDDA912_g02120	A0A0G2HSW9	GI:821084518|EMBL-CDS:KKY37903.1	#006400	Diaporthe ampelina.	A0A0G2HSW9	233	A0A0G2HSW9	Diaporthe ampelina
13	13	Endoglucanase	JEMN01001803	CNYM01_09125	A0A135RT28	GI:996579564|EMBL-CDS:KXH26866.1	#006400	Colletotrichum nymphaeae SA-01.	A0A135RT28	296	A0A135RT28	Colletotrichum nymphaeae SA-01
13	13	Endoglucanase	JFBX01000672	CSIM01_04043	A0A135S684	GI:996587367|EMBL-CDS:KXH31424.1	#006400	Colletotrichum simmondsii.	A0A135S684	296	A0A135S684	Colletotrichum simmondsii
13	13	Endoglucanase	JARH01000758	CFIO01_10921	A0A010RH27	GI:588895434|GI:615465165|EMBL-CDS:EXF77149.1|REFSEQ:XP_007599200.1	#006400	Colletotrichum fioriniae PJ7.	A0A010RH27	296	A0A010RH27	Colletotrichum fioriniae PJ7
13	13	Uncharacterized protein	KI912111	PFICI_04342	W3XB99	GI:573062815|GI:630014257|EMBL-CDS:ETS82466.1|REFSEQ:XP_007831114.1	#006400	Pestalotiopsis fici (strain W106-1 / CGMCC3.15140)	W3XB99	307	W3XB99	Pestalotiopsis fici W106-1
13	13	Endoglucanase	JFFI01001930	CSAL01_11417	A0A135TMP8	GI:996615163|EMBL-CDS:KXH49387.1	#006400	Colletotrichum salicis.	A0A135TMP8	296	A0A135TMP8	Colletotrichum salicis
13	13	Endoglucanase	MAVT02000500	DHEL01_v206256	A0A2P5HYL4	EMBL-CDS:POS75344.1	#006400	Diaporthe helianthi.	A0A2P5HYL4	309	A0A2P5HYL4	Diaporthe helianthi
13	13	Uncharacterized protein	MZNU01000297	B2J93_6511	A0A218YZ05	GI:1209029737|EMBL-CDS:OWP01037.1	#006400	Marssonina coronariae.	A0A218YZ05	298	A0A218YZ05	Marssonina coronariae
13	13	Uncharacterized protein	AMYD01003210	CGLO_14025	T0L5Q9	GI:530464539|EMBL-CDS:EQB46896.1	#006400	Colletotrichum gloeosporioides (strain Cg-14)	T0L5Q9	309	T0L5Q9	Colletotrichum gloeosporioides Cg-14
13	13	Endoglucanase	MJBS01000022	CORC01_03639	A0A1G4BI28	GI:1088692755|EMBL-CDS:OHF01072.1	#006400	Colletotrichum orchidophilum.	A0A1G4BI28	271	A0A1G4BI28	Colletotrichum orchidophilum
13	13	Uncharacterized protein	KB021258	CGGC5_2157	L2FFQ2	GI:596721955|GI:429849159|EMBL-CDS:ELA24573.1|REFSEQ:XP_007286415.1	#006400	Colletotrichum gloeosporioides (strain Nara gc5)	L2FFQ2	305	L2FFQ2	Colletotrichum gloeosporioides Nara gc5
13	13	Uncharacterized protein	JH921428	MBM_00055	K1X758	GI:406867905|GI:597569775|EMBL-CDS:EKD20942.1|REFSEQ:XP_007287944.1	#006400	Marssonina brunnea f. sp. multigermtubi (strain MB_m1)	K1X758	307	K1X758	Marssonina brunnea f. sp. 'multigermtubi' MB_m1
14	13	Uncharacterized protein	MCGR01000025	BCR35DRAFT_304434	A0A1Y2FBK5	GI:1183456187|EMBL-CDS:ORY80245.1	#00FF00	Leucosporidium creatinivorum.	A0A1Y2FBK5	425	A0A1Y2FBK5	Leucosporidium creatinivorum
14	13	SPOSA6832_03854-mRNA-1:cds	CENE01000020	SPOSA6832_03854	A0A0D6EQ27	EMBL-CDS:CEQ42069.1	#00FF00	Sporidiobolus salmonicolor	A0A0D6EQ27	370	A0A0D6EQ27	Sporidiobolus salmonicolor
14	13	SPOSA6832_00091-mRNA-1:cds	CENE01000001	SPOSA6832_00091	A0A0D6EFB5	EMBL-CDS:CEQ38644.1	#00FF00	Sporidiobolus salmonicolor	A0A0D6EFB5	441	A0A0D6EFB5	Sporidiobolus salmonicolor
14	13	Uncharacterized protein	GL541643	MVLG_00047	U5GXX2	GI:634354634|EMBL-CDS:-|EMBL-CDS:KDE09641.1	#00FF00	Microbotryum lychnidis-dioicae (strain p1A1 Lamole / MvSl-1064)	U5GXX2	401	U5GXX2	Microbotryum lychnidis-dioicae p1A1 Lamole
14	13	Uncharacterized protein	MCGR01000025	BCR35DRAFT_279187	A0A1Y2F9Y0	GI:1183456186|EMBL-CDS:ORY80244.1	#00FF00	Leucosporidium creatinivorum.	A0A1Y2F9Y0	453	A0A1Y2F9Y0	Leucosporidium creatinivorum
14	13	BQ2448_463 protein	FMSP01000003	BQ2448_463	A0A238F2I3	EMBL-CDS:SCV68342.1	#00FF00	Microbotryum intermedium.	A0A238F2I3	382	A0A238F2I3	Microbotryum intermedium
14	13	BY PROTMAP: gi|472587353|gb|EMS24852.1| endoglucanase [Rhodosporidium toruloides NP11] gi|647401282|emb|CDR47410.1| RHTO0S14e03334g1_1 [Rhodosporidium toruloides]	CWKI01000002	BN2166_0014680	A0A0K3CAD0	EMBL-CDS:CTR05607.1	#00FF00	Rhodosporidium toruloides	A0A0K3CAD0	474	A0A0K3CAD0	Rhodotorula toruloides
14	13	Endoglucanase	KB722644	RHTO_05032	M7WW86	GI:1022843746|GI:472587353|EMBL-CDS:EMS24852.1|REFSEQ:XP_016275971.1	#00FF00	Rhodosporidium toruloides (strain NP11)	472587353|EMS24852.1|M7WW86	472	M7WW86	Rhodotorula toruloides NP11
14	13	RHTO0S14e03334g1_1	LK052949	RHTO0S_14e03334g	A0A061BK73	GI:647401282|EMBL-CDS:CDR47410.1	#00FF00	Rhodosporidium toruloides	647401282|CDR47410.1|A0A061BK73	472	A0A061BK73	Rhodotorula toruloides
14	13	Putative endoglucanase	KQ954516	RHOSPDRAFT_21856	A0A120E688	GI:983144103|EMBL-CDS:KWU42108.1	#00FF00	Rhodotorula sp. JG-1b.	A0A120E688	203	A0A120E688	Rhodotorula sp. JG-1b
14	13	Uncharacterized protein	KQ474073	RHOBADRAFT_50565	A0A194SEV2	GI:939616030|GI:1069918121|EMBL-CDS:KPV78046.1|REFSEQ:XP_018274095.1	#00FF00	Rhodotorula graminis (strain WP1)	A0A194SEV2	502	A0A194SEV2	Rhodotorula graminis WP1
15	13	Uncharacterized protein	MCFL01000019	BCR44DRAFT_33888	A0A1Y2HN78	GI:1183512806|EMBL-CDS:ORZ36038.1	#B259B2	Catenaria anguillulae PL171.	A0A1Y2HN78	335	A0A1Y2HN78	Catenaria anguillulae PL171
15	13	Uncharacterized protein	GG745343	AMAG_09045	A0A0L0SNP2	GI:909138522|EMBL-CDS:KNE63984.1	#B259B2	Allomyces macrogynus ATCC 38327.	A0A0L0SNP2	340	A0A0L0SNP2	Allomyces macrogynus ATCC 38327
15	13	Uncharacterized protein	GG745353	AMAG_12002	A0A0L0SZ17	GI:909143185|EMBL-CDS:KNE67549.1	#B259B2	Allomyces macrogynus ATCC 38327.	A0A0L0SZ17	341	A0A0L0SZ17	Allomyces macrogynus ATCC 38327
15	13	Uncharacterized protein	MCFL01000049	BCR44DRAFT_1416547	A0A1Y2HCF5	GI:1183508933|EMBL-CDS:ORZ32195.1	#B259B2	Catenaria anguillulae PL171.	A0A1Y2HCF5	350	A0A1Y2HCF5	Catenaria anguillulae PL171
15	13	Uncharacterized protein	MCFL01000027	BCR44DRAFT_120912	A0A1Y2HLQ1	GI:1183511383|EMBL-CDS:ORZ34623.1	#B259B2	Catenaria anguillulae PL171.	A0A1Y2HLQ1	350	A0A1Y2HLQ1	Catenaria anguillulae PL171
15	13	Uncharacterized protein	MCFL01000027	BCR44DRAFT_1373749	A0A1Y2HKM7	GI:1183511294|EMBL-CDS:ORZ34534.1	#B259B2	Catenaria anguillulae PL171.	A0A1Y2HKM7	162	A0A1Y2HKM7	Catenaria anguillulae PL171
15	13	Uncharacterized protein	MCFL01000016	BCR44DRAFT_49531	A0A1Y2HTS3	GI:1183513323|EMBL-CDS:ORZ36552.1	#B259B2	Catenaria anguillulae PL171.	A0A1Y2HTS3	328	A0A1Y2HTS3	Catenaria anguillulae PL171
15	13	Uncharacterized protein	GG745377	AMAG_16637	A0A0L0TBS2	GI:909149719|EMBL-CDS:KNE72145.1	#B259B2	Allomyces macrogynus ATCC 38327.	A0A0L0TBS2	353	A0A0L0TBS2	Allomyces macrogynus ATCC 38327
15	13	Uncharacterized protein	MCFL01000027	BCR44DRAFT_1390396	A0A1Y2HJ77	GI:1183511375|EMBL-CDS:ORZ34615.1	#B259B2	Catenaria anguillulae PL171.	A0A1Y2HJ77	226	A0A1Y2HJ77	Catenaria anguillulae PL171
15	13	Uncharacterized protein	MCFL01000027	BCR44DRAFT_1390395	A0A1Y2HJ85	GI:1183511385|EMBL-CDS:ORZ34625.1	#B259B2	Catenaria anguillulae PL171.	A0A1Y2HJ85	174	A0A1Y2HJ85	Catenaria anguillulae PL171
15	13	Uncharacterized protein	MCFL01000049	BCR44DRAFT_104152	A0A1Y2HC66	GI:1183508935|EMBL-CDS:ORZ32197.1	#B259B2	Catenaria anguillulae PL171.	A0A1Y2HC66	168	A0A1Y2HC66	Catenaria anguillulae PL171
15	13	Uncharacterized protein	GG745371	AMAG_20341	A0A0L0T9D7	GI:909148439|EMBL-CDS:KNE71362.1	#B259B2	Allomyces macrogynus ATCC 38327.	A0A0L0T9D7	274	A0A0L0T9D7	Allomyces macrogynus ATCC 38327
15	13	Uncharacterized protein	MCFL01000027	BCR44DRAFT_52168	A0A1Y2HLF9	GI:1183511293|EMBL-CDS:ORZ34533.1	#B259B2	Catenaria anguillulae PL171.	A0A1Y2HLF9	302	A0A1Y2HLF9	Catenaria anguillulae PL171
16	11	Uncharacterized protein	MCFF01000013	BCR41DRAFT_351103	A0A1Y2GR35	GI:1183496338|EMBL-CDS:ORZ19994.1	#003366	Lobosporangium transversale.	A0A1Y2GR35	226	A0A1Y2GR35	Lobosporangium transversale
16	11	Uncharacterized protein	MCFF01000013	BCR41DRAFT_286931	A0A1Y2GVB5	GI:1183496333|EMBL-CDS:ORZ19989.1	#003366	Lobosporangium transversale.	A0A1Y2GVB5	170	A0A1Y2GVB5	Lobosporangium transversale
16	11	Uncharacterized protein	MCFF01000013	BCR41DRAFT_385582	A0A1Y2GR39	GI:1183496334|GI:1183496337|EMBL-CDS:ORZ19990.1|EMBL-CDS:ORZ19993.1	#003366	Lobosporangium transversale.	A0A1Y2GR39	287	A0A1Y2GR39	Lobosporangium transversale
16	11	Uncharacterized protein	MCFF01000013	BCR41DRAFT_351098	A0A1Y2GR53	GI:1183496331|EMBL-CDS:ORZ19987.1	#003366	Lobosporangium transversale.	A0A1Y2GR53	228	A0A1Y2GR53	Lobosporangium transversale
16	11	Uncharacterized protein	MCFF01000028	BCR41DRAFT_387756	A0A1Y2GHU6	GI:1183487585|EMBL-CDS:ORZ11301.1	#003366	Lobosporangium transversale.	A0A1Y2GHU6	231	A0A1Y2GHU6	Lobosporangium transversale
16	11	Uncharacterized protein	MCFF01000013	BCR41DRAFT_421114	A0A1Y2GR85	GI:1183496336|GI:1183496335|EMBL-CDS:ORZ19991.1|EMBL-CDS:ORZ19992.1	#003366	Lobosporangium transversale.	A0A1Y2GR85	277	A0A1Y2GR85	Lobosporangium transversale
16	11	Uncharacterized protein	MCFF01000013	BCR41DRAFT_404514	A0A1Y2GSN0	GI:1183496332|EMBL-CDS:ORZ19988.1	#003366	Lobosporangium transversale.	A0A1Y2GSN0	220	A0A1Y2GSN0	Lobosporangium transversale
16	11	Lytic polysaccharide monooxygenase	KV442017	K457DRAFT_133609	A0A197KD41	GI:1032653335|EMBL-CDS:OAQ34606.1	#003366	Mortierella elongata AG-77.	A0A197KD41	270	A0A197KD41	Mortierella elongata AG-77
16	11	Lytic polysaccharide monooxygenase	KV442025	K457DRAFT_108082	A0A197K4A6	GI:1032651036|EMBL-CDS:OAQ32315.1	#003366	Mortierella elongata AG-77.	A0A197K4A6	222	A0A197K4A6	Mortierella elongata AG-77
16	11	Uncharacterized protein	KV442032	K457DRAFT_136589	A0A197K3B9	GI:1032649668|EMBL-CDS:OAQ30954.1	#003366	Mortierella elongata AG-77.	A0A197K3B9	235	A0A197K3B9	Mortierella elongata AG-77
16	11	Uncharacterized protein	MCFF01000013	BCR41DRAFT_351109	A0A1Y2GTE1	GI:1183496344|EMBL-CDS:ORZ20000.1	#003366	Lobosporangium transversale.	A0A1Y2GTE1	224	A0A1Y2GTE1	Lobosporangium transversale
17	10	Uncharacterized protein	JEMT01016915	RirG_098080	A0A015KNT4	GI:595481046|EMBL-CDS:EXX69229.1	#7FFFBF	Rhizophagus irregularis DAOM 197198w.	A0A015KNT4	386	A0A015KNT4	Rhizophagus irregularis DAOM 197198w
17	10	Uncharacterized protein	LLXL01000321	RhiirA1_411247	A0A2I1ELD3	EMBL-CDS:PKC08704.1|EMBL-CDS:PKC72847.1|EMBL-CDS:PKK74173.1|EMBL-CDS:PKY22927.1	#7FFFBF	Rhizophagus irregularis.	A0A2I1ELD3	386	A0A2I1ELD3	Rhizophagus irregularis
17	10	Uncharacterized protein	LLXI01000329	RhiirA4_400001	A0A2I1GD36	EMBL-CDS:PKY44537.1	#7FFFBF	Rhizophagus irregularis.	A0A2I1GD36	386	A0A2I1GD36	Rhizophagus irregularis
17	10	Lytic polysaccharide monooxygenase/carbohydrate-binding module family 19 protein	AUPC02000160	GLOIN_2v1641442	U9U409	GI:552930718|EMBL-CDS:ESA14427.1|EMBL-CDS:POG68037.1	#7FFFBF	Rhizophagus irregularis (strain DAOM 181602 / DAOM 197198 / MUCL43194)	U9U409	386	U9U409	Rhizophagus irregularis DAOM 181602=DAOM 197198
17	10	Endoglucanase	BDIQ01000017	RIR_0274400	A0A2H5R7V3	EMBL-CDS:GBC14149.1	#7FFFBF	Rhizophagus irregularis (strain DAOM 181602 / DAOM 197198 / MUCL43194)	A0A2H5R7V3	353	A0A2H5R7V3	Rhizophagus irregularis DAOM 181602=DAOM 197198
17	10	Uncharacterized protein		g	A0A1D1Z5X3	EMBL-CDS:JAT62212.1	#7FFFBF	Anthurium amnicola.	A0A1D1Z5X3	339	A0A1D1Z5X3	Anthurium amnicola
17	10	Uncharacterized protein		g	A0A1D1ZGA4	EMBL-CDS:JAT65984.1	#7FFFBF	Anthurium amnicola.	A0A1D1ZGA4	311	A0A1D1ZGA4	Anthurium amnicola
17	10	Uncharacterized protein	KE560903	O9G_001685	A0A075AXA7	GI:528894779|EMBL-CDS:EPZ34955.1	#7FFFBF	Rozella allomycis CSF55.	A0A075AXA7	315	A0A075AXA7	Rozella allomycis CSF55
17	10	Uncharacterized protein	KU305754	None	A0A140D079	GI:995975443|EMBL-CDS:AMJ52392.1	#7FFFBF	Rhizophagus clarus.	A0A140D079	346	A0A140D079	Rhizophagus clarus
17	10	Uncharacterized protein		g	A0A1D1Z390	EMBL-CDS:JAT61370.1	#7FFFBF	Anthurium amnicola.	A0A1D1Z390	268	A0A1D1Z390	Anthurium amnicola
18	10	Putative endoglucanase	MCFE01000191	K493DRAFT_139122	A0A1Y1YA99	GI:1183368926|EMBL-CDS:ORX94941.1	#8000FF	Basidiobolus meristosporus CBS 931.73.	A0A1Y1YA99	179	A0A1Y1YA99	Basidiobolus meristosporus CBS 931.73
18	10	Uncharacterized protein	MCFE01000050	K493DRAFT_143958	A0A1Y1YYI1	GI:1183334745|GI:1183377541|EMBL-CDS:ORX64103.1|EMBL-CDS:ORY03081.1	#8000FF	Basidiobolus meristosporus CBS 931.73.	A0A1Y1YYI1	170	A0A1Y1YYI1	Basidiobolus meristosporus CBS 931.73
18	10	Putative endoglucanase	MCFE01000081	K493DRAFT_323657	A0A1Y1YSN1	GI:1183374942|EMBL-CDS:ORY00585.1	#8000FF	Basidiobolus meristosporus CBS 931.73.	A0A1Y1YSN1	179	A0A1Y1YSN1	Basidiobolus meristosporus CBS 931.73
18	10	Putative endoglucanase	MCFE01000191	K493DRAFT_154765	A0A1Y1YA98	GI:1183368925|EMBL-CDS:ORX94940.1	#8000FF	Basidiobolus meristosporus CBS 931.73.	A0A1Y1YA98	166	A0A1Y1YA98	Basidiobolus meristosporus CBS 931.73
18	10	Putative endoglucanase	MCFE01001112	K493DRAFT_147956	A0A1Y1W1G8	GI:1183338350|EMBL-CDS:ORX67350.1	#8000FF	Basidiobolus meristosporus CBS 931.73.	A0A1Y1W1G8	171	A0A1Y1W1G8	Basidiobolus meristosporus CBS 931.73
18	10	Uncharacterized protein	MCFE01000060	K493DRAFT_154364	A0A1Y1YVX8	GI:1183376580|EMBL-CDS:ORY02151.1	#8000FF	Basidiobolus meristosporus CBS 931.73.	A0A1Y1YVX8	170	A0A1Y1YVX8	Basidiobolus meristosporus CBS 931.73
18	10	Putative endoglucanase	MCFE01000732	K493DRAFT_157156	A0A1Y1X4D5	GI:1183352725|EMBL-CDS:ORX80677.1	#8000FF	Basidiobolus meristosporus CBS 931.73.	A0A1Y1X4D5	179	A0A1Y1X4D5	Basidiobolus meristosporus CBS 931.73
18	10	Uncharacterized protein	MCFE01000697	K493DRAFT_145586	A0A1Y1X783	GI:1183353731|EMBL-CDS:ORX81582.1	#8000FF	Basidiobolus meristosporus CBS 931.73.	A0A1Y1X783	170	A0A1Y1X783	Basidiobolus meristosporus CBS 931.73
18	10	Uncharacterized protein	MCFE01000167	K493DRAFT_140750	A0A1Y1YDM6	GI:1183369892|EMBL-CDS:ORX95826.1	#8000FF	Basidiobolus meristosporus CBS 931.73.	A0A1Y1YDM6	142	A0A1Y1YDM6	Basidiobolus meristosporus CBS 931.73
18	10	Putative endoglucanase	MCFE01000194	K493DRAFT_157239	A0A1Y1YA05	GI:1183368812|EMBL-CDS:ORX94837.1	#8000FF	Basidiobolus meristosporus CBS 931.73.	A0A1Y1YA05	171	A0A1Y1YA05	Basidiobolus meristosporus CBS 931.73
19	9	Uncharacterized protein	KQ964627	CONCODRAFT_10335	A0A137NXI2	GI:1000776193|EMBL-CDS:KXN67570.1	#B25900	Conidiobolus coronatus (strain ATCC 28846 / CBS 209.66 / NRRL 28638)	A0A137NXI2	221	A0A137NXI2	Conidiobolus coronatus NRRL 28638
19	9	Uncharacterized protein	KQ964627	CONCODRAFT_42689	A0A137NXR2	GI:1000776188|EMBL-CDS:KXN67565.1	#B25900	Conidiobolus coronatus (strain ATCC 28846 / CBS 209.66 / NRRL 28638)	A0A137NXR2	205	A0A137NXR2	Conidiobolus coronatus NRRL 28638
19	9	Uncharacterized protein	KQ964627	CONCODRAFT_42719	A0A137NXT7	GI:1000776190|EMBL-CDS:KXN67567.1	#B25900	Conidiobolus coronatus (strain ATCC 28846 / CBS 209.66 / NRRL 28638)	A0A137NXT7	154	A0A137NXT7	Conidiobolus coronatus NRRL 28638
19	9	Uncharacterized protein	KQ964627	CONCODRAFT_10336	A0A137NY27	GI:1000776194|EMBL-CDS:KXN67571.1	#B25900	Conidiobolus coronatus (strain ATCC 28846 / CBS 209.66 / NRRL 28638)	A0A137NY27	204	A0A137NY27	Conidiobolus coronatus NRRL 28638
19	9	Uncharacterized protein	KQ964627	CONCODRAFT_28503	A0A137NXP4	GI:1000776189|EMBL-CDS:KXN67566.1	#B25900	Conidiobolus coronatus (strain ATCC 28846 / CBS 209.66 / NRRL 28638)	A0A137NXP4	174	A0A137NXP4	Conidiobolus coronatus NRRL 28638
19	9	Uncharacterized protein	KQ964627	CONCODRAFT_42713	A0A137NY91	GI:1000776192|EMBL-CDS:KXN67569.1	#B25900	Conidiobolus coronatus (strain ATCC 28846 / CBS 209.66 / NRRL 28638)	A0A137NY91	152	A0A137NY91	Conidiobolus coronatus NRRL 28638
19	9	Uncharacterized protein	KQ964596	CONCODRAFT_42107	A0A137NZ48	GI:1000776757|EMBL-CDS:KXN68103.1	#B25900	Conidiobolus coronatus (strain ATCC 28846 / CBS 209.66 / NRRL 28638)	A0A137NZ48	210	A0A137NZ48	Conidiobolus coronatus NRRL 28638
19	9	Uncharacterized protein	KQ964596	CONCODRAFT_79921	A0A137NZT3	GI:1000776753|EMBL-CDS:KXN68099.1	#B25900	Conidiobolus coronatus (strain ATCC 28846 / CBS 209.66 / NRRL 28638)	A0A137NZT3	213	A0A137NZT3	Conidiobolus coronatus NRRL 28638
19	9	Uncharacterized protein	KQ964596	CONCODRAFT_42091	A0A137NZ34	GI:1000776754|EMBL-CDS:KXN68100.1	#B25900	Conidiobolus coronatus (strain ATCC 28846 / CBS 209.66 / NRRL 28638)	A0A137NZ34	213	A0A137NZ34	Conidiobolus coronatus NRRL 28638
20	9	Uncharacterized protein	GL377318	SCHCODRAFT_238682	D8QLA8	GI:300099812|GI:302672888|EMBL-CDS:EFI91228.1|REFSEQ:XP_003026131.1	#592C00	Schizophyllum commune (strain H4-8 / FGSC 9210)	D8QLA8	264	D8QLA8	Schizophyllum commune H4-8
20	9	Uncharacterized protein	KN881832	FISHEDRAFT_43052	A0A0D7AD09	GI:761927418|EMBL-CDS:KIY48555.1	#592C00	Fistulina hepatica ATCC 64428.	A0A0D7AD09	334	A0A0D7AD09	Fistulina hepatica ATCC 64428
20	9	Uncharacterized protein	GL377304	SCHCODRAFT_256354	D8PYP3	GI:300107326|GI:302687903|EMBL-CDS:EFI98728.1|REFSEQ:XP_003033631.1	#592C00	Schizophyllum commune (strain H4-8 / FGSC 9210)	D8PYP3	446	D8PYP3	Schizophyllum commune H4-8
20	9	Uncharacterized protein	GL377316	SCHCODRAFT_62159	D8QK94	GI:300100257|GI:302673776|EMBL-CDS:EFI91671.1|REFSEQ:XP_003026574.1	#592C00	Schizophyllum commune (strain H4-8 / FGSC 9210)	D8QK94	203	D8QK94	Schizophyllum commune H4-8
20	9	Uncharacterized protein	GL377306	SCHCODRAFT_85194	D8Q4M7	GI:302684969|GI:300105858|EMBL-CDS:EFI97262.1|REFSEQ:XP_003032165.1	#592C00	Schizophyllum commune (strain H4-8 / FGSC 9210)	D8Q4M7	327	D8Q4M7	Schizophyllum commune H4-8
20	9	Uncharacterized protein	GL377325	SCHCODRAFT_83710	D8QMF2	GI:302672371|GI:300099550|EMBL-CDS:EFI90973.1|REFSEQ:XP_003025876.1	#592C00	Schizophyllum commune (strain H4-8 / FGSC 9210)	D8QMF2	431	D8QMF2	Schizophyllum commune H4-8
20	9	Uncharacterized protein	GL377308	SCHCODRAFT_235734	D8QAT3	GI:302680533|GI:300103639|EMBL-CDS:EFI95045.1|REFSEQ:XP_003029948.1	#592C00	Schizophyllum commune (strain H4-8 / FGSC 9210)	D8QAT3	271	D8QAT3	Schizophyllum commune H4-8
20	9	Uncharacterized protein	GL377309	SCHCODRAFT_43113	D8QAT9	GI:300103229|GI:302679714|EMBL-CDS:EFI94636.1|REFSEQ:XP_003029539.1	#592C00	Schizophyllum commune (strain H4-8 / FGSC 9210)	D8QAT9	188	D8QAT9	Schizophyllum commune H4-8
20	9	Uncharacterized protein	GL377309	SCHCODRAFT_16695	D8QB70	GI:300102891|GI:302679038|EMBL-CDS:EFI94298.1|REFSEQ:XP_003029201.1	#592C00	Schizophyllum commune (strain H4-8 / FGSC 9210)	D8QB70	322	D8QB70	Schizophyllum commune H4-8
21	8	Putative endoglucanase	MCFA01000052	BCR34DRAFT_482815	A0A1Y1ZQ86	GI:1183387160|EMBL-CDS:ORY12364.1	#800000	Clohesyomyces aquaticus.	A0A1Y1ZQ86	227	A0A1Y1ZQ86	Clohesyomyces aquaticus
21	8	Uncharacterized protein	CH445335	SNOG_07498	Q0UL66	GI:169608826|GI:160701725|EMBL-CDS:EAT84964.2|REFSEQ:XP_001797832.1	#800000	Phaeosphaeria nodorum (strain SN15 / ATCC MYA-4574 / FGSC 10173)	Q0UL66	783	Q0UL66	Parastagonospora nodorum SN15
21	8	Uncharacterized protein	KZ107842	B5807_04873	A0A1Y2M4R3	GI:1188281549|EMBL-CDS:OSS50437.1	#800000	Epicoccum nigrum	A0A1Y2M4R3	702	A0A1Y2M4R3	Epicoccum nigrum
21	8	Uncharacterized protein	KV441553	CC84DRAFT_1148414	A0A177CEE9	GI:1066287479|GI:1027144728|EMBL-CDS:OAG05179.1|REFSEQ:XP_018035544.1	#800000	Paraphaeosphaeria sporulosa.	A0A177CEE9	226	A0A177CEE9	Paraphaeosphaeria sporulosa
21	8	Predicted protein	FP929105	LEMA_P044550	E4ZQ19	GI:396464617|GI:312213472|EMBL-CDS:CBX93554.1|REFSEQ:XP_003836919.1	#800000	Leptosphaeria maculans (strain JN3 / isolate v23.1.3 / raceAv1-4-5-6-7-8)	E4ZQ19	1157	E4ZQ19	Leptosphaeria maculans JN3
21	8	Uncharacterized protein	KV441636	IQ07DRAFT_594013	A0A178EKC5	GI:1029191940|EMBL-CDS:OAL56498.1	#800000	Pyrenochaeta sp. DS3sAY3a.	A0A178EKC5	1521	A0A178EKC5	Pyrenochaeta sp. DS3sAY3a
21	8	Uncharacterized protein	KV441716	IQ06DRAFT_307187	A0A178AKC2	GI:1028895766|EMBL-CDS:OAK98026.1	#800000	Stagonospora sp. SRC1lsM3a.	A0A178AKC2	786	A0A178AKC2	Stagonospora sp. SRC1lsM3a
21	8	Uncharacterized protein	JYNV01000244	ST47_g7387	A0A163B042	GI:1020700855|EMBL-CDS:KZM21495.1	#800000	Didymella rabiei	A0A163B042	1084	A0A163B042	Ascochyta rabiei
22	7	Endoglucanase	JH921449	MBM_08343	K1W8W0	GI:406860567|GI:597586351|EMBL-CDS:EKD13625.1|REFSEQ:XP_007296232.1	#0080FF	Marssonina brunnea f. sp. multigermtubi (strain MB_m1)	K1W8W0	395	K1W8W0	Marssonina brunnea f. sp. 'multigermtubi' MB_m1
22	7	Uncharacterized protein	FJUX01000069	RAG0_10935	A0A1E1L1Z9	EMBL-CDS:CZT04510.1	#0080FF	Rhynchosporium agropyri.	A0A1E1L1Z9	380	A0A1E1L1Z9	Rhynchosporium agropyri
22	7	Uncharacterized protein	FJUW01000051	RCO7_03684	A0A1E1LGA0	EMBL-CDS:CZT09560.1	#0080FF	Rhynchosporium commune.	A0A1E1LGA0	380	A0A1E1LGA0	Rhynchosporium commune
22	7	Uncharacterized protein	FJVC01000174	RSE6_04640	A0A1E1M5U1	EMBL-CDS:CZT44470.1	#0080FF	Rhynchosporium secalis	A0A1E1M5U1	380	A0A1E1M5U1	Rhynchosporium secalis
22	7	Uncharacterized protein	MZNU01000230	B2J93_65	A0A218Z357	GI:1209031383|EMBL-CDS:OWP02489.1	#0080FF	Marssonina coronariae.	A0A218Z357	378	A0A218Z357	Marssonina coronariae
22	7	Endoglucanase	MVNX01000157	BUE80_DR010729	A0A2H3EHX2	EMBL-CDS:PBP18186.1	#0080FF	Diplocarpon rosae.	A0A2H3EHX2	377	A0A2H3EHX2	Diplocarpon rosae
22	7	Endoglucanase	MVNX01000018	BUE80_DR002576	A0A2H3FUD7	EMBL-CDS:PBP26324.1	#0080FF	Diplocarpon rosae.	A0A2H3FUD7	376	A0A2H3FUD7	Diplocarpon rosae
23	6	Uncharacterized protein	KN832875	OIDMADRAFT_179013	A0A0C3HH84	GI:751753514|EMBL-CDS:KIN01692.1	#404040	Oidiodendron maius Zn.	A0A0C3HH84	430	A0A0C3HH84	Oidiodendron maius Zn
23	6	Uncharacterized protein	FQ790296	BofuT4P25000005001	G2Y7W2	GI:347832993|EMBL-CDS:CCD48690.1	#404040	Botryotinia fuckeliana (strain T4)	G2Y7W2	499	G2Y7W2	Botrytis cinerea T4
23	6	Putative exo-beta glucanase protein	KB707930	BcDW1_6603	M7UMA0	GI:472239963|EMBL-CDS:EMR84747.1	#404040	Botryotinia fuckeliana (strain BcDW1)	M7UMA0	499	M7UMA0	Botrytis cinerea BcDW1
23	6	Uncharacterized protein	AYSA01000070	SBOR_1848	W9CPI5	GI:563297622|EMBL-CDS:ESZ97766.1	#404040	Sclerotinia borealis F-4128.	W9CPI5	487	W9CPI5	Sclerotinia borealis F-4128
23	6	Uncharacterized protein	CP017827	sscle_14g100430	A0A1D9QL11	GI:156048352|GI:1095458322|EMBL-CDS:APA15273.1|REFSEQ:XP_001590143.1	#404040	Sclerotinia sclerotiorum (strain ATCC 18683 / 1980 / Ss-1)	A0A1D9QL11	515	A0A1D9QL11	Sclerotinia sclerotiorum 1980 UF-70
23	6	Uncharacterized protein	CH476632	SS1G_08907	A7EUA0	GI:154693304|GI:156048352|EMBL-CDS:EDN93042.1|REFSEQ:XP_001590143.1	#404040	Sclerotinia sclerotiorum (strain ATCC 18683 / 1980 / Ss-1)	A7EUA0	515	A7EUA0	Sclerotinia sclerotiorum 1980 UF-70
24	5	Uncharacterized protein	AHHD01000427	MPH_10105	K2QS88	GI:407919530|EMBL-CDS:EKG12761.1	#FF4040	Macrophomina phaseolina (strain MS6)	K2QS88	424	K2QS88	Macrophomina phaseolina MS6
24	5	Putative chitin-binding domain 3 protein	KB915668	UCRNP2_155	R1GXE9	GI:485929682|GI:615398474|EMBL-CDS:EOD53021.1|REFSEQ:XP_007579483.1	#FF4040	Botryosphaeria parva (strain UCR-NP2)	R1GXE9	400	R1GXE9	Neofusicoccum parvum UCRNP2
24	5	Putative chitin-binding domain 3	LAQI01000017	UCDDS831_g00594	A0A0G2F0R3	GI:821072931|EMBL-CDS:KKY27881.1	#FF4040	Diplodia seriata.	A0A0G2F0R3	417	A0A0G2F0R3	Diplodia seriata
24	5	Uncharacterized protein	MSZU01000113	BK809_0000914	A0A1S8B5B9	GI:1137649288|EMBL-CDS:OMP82725.1	#FF4040	Diplodia seriata.	A0A1S8B5B9	420	A0A1S8B5B9	Diplodia seriata
24	5	Chitin-binding domain 3 protein	MNUE01000056	BKCO1_5600063	A0A1J9QPA9	GI:1103744240|EMBL-CDS:OJD30750.1	#FF4040	Diplodia corticola.	A0A1J9QPA9	409	A0A1J9QPA9	Diplodia corticola
25	5	Uncharacterized protein	FN430336	GSTUM_00009379001	D5GK59	GI:296422324|GI:295636933|EMBL-CDS:CAZ84902.1|REFSEQ:XP_002840711.1	#40FF40	Tuber melanosporum (strain Mel28)	D5GK59	411	D5GK59	Tuber melanosporum Mel28
25	5	Uncharacterized protein	HF936105	PCON_01196	U4L4M3	GI:549056284|GI:549045402|EMBL-CDS:CCX04980.1|EMBL-CDS:CCX14970.1	#40FF40	Pyronema omphalodes (strain CBS 100304)	U4L4M3	424	U4L4M3	Pyronema omphalodes CBS 100304
25	5	Uncharacterized protein	FN430376	GSTUM_00011916001	D5GPM0	GI:295638534|GI:296425486|EMBL-CDS:CAZ86463.1|REFSEQ:XP_002842272.1	#40FF40	Tuber melanosporum (strain Mel28)	D5GPM0	407	D5GPM0	Tuber melanosporum Mel28
25	5	Uncharacterized protein	LN891010	GSTUAT00004049001	A0A292PWE1	EMBL-CDS:CUS11866.1	#40FF40	Tuber aestivum	A0A292PWE1	413	A0A292PWE1	Tuber aestivum
25	5	Uncharacterized protein	LN891026	GSTUAT00004640001	A0A292PUQ7	EMBL-CDS:CUS11276.1	#40FF40	Tuber aestivum	A0A292PUQ7	390	A0A292PUQ7	Tuber aestivum
26	5	Uncharacterized protein	KQ964645	CONCODRAFT_10657	A0A137NX39	GI:1000775917|EMBL-CDS:KXN67312.1	#4040FF	Conidiobolus coronatus (strain ATCC 28846 / CBS 209.66 / NRRL 28638)	A0A137NX39	287	A0A137NX39	Conidiobolus coronatus NRRL 28638
26	5	Uncharacterized protein	KQ964645	CONCODRAFT_43007	A0A137NWU7	GI:1000775915|EMBL-CDS:KXN67310.1	#4040FF	Conidiobolus coronatus (strain ATCC 28846 / CBS 209.66 / NRRL 28638)	A0A137NWU7	147	A0A137NWU7	Conidiobolus coronatus NRRL 28638
26	5	Uncharacterized protein	KQ964645	CONCODRAFT_28559	A0A137NXB3	GI:1000775913|EMBL-CDS:KXN67308.1	#4040FF	Conidiobolus coronatus (strain ATCC 28846 / CBS 209.66 / NRRL 28638)	A0A137NXB3	176	A0A137NXB3	Conidiobolus coronatus NRRL 28638
26	5	Putative endoglucanase	KQ964645	CONCODRAFT_26548	A0A137NX81	GI:1000775906|EMBL-CDS:KXN67301.1	#4040FF	Conidiobolus coronatus (strain ATCC 28846 / CBS 209.66 / NRRL 28638)	A0A137NX81	179	A0A137NX81	Conidiobolus coronatus NRRL 28638
26	5	Uncharacterized protein	KQ964645	CONCODRAFT_61151	A0A137NXD6	GI:1000775914|EMBL-CDS:KXN67309.1	#4040FF	Conidiobolus coronatus (strain ATCC 28846 / CBS 209.66 / NRRL 28638)	A0A137NXD6	419	A0A137NXD6	Conidiobolus coronatus NRRL 28638
27	4	Uncharacterized protein	NAJO01000043	B0A48_15173	A0A1V8SIG2	GI:1172583405|EMBL-CDS:OQN98827.1	#004040	Rachicladosporium antarcticum.	A0A1V8SIG2	463	A0A1V8SIG2	Rachicladosporium antarcticum
27	4	Uncharacterized protein	NAJO01000005	B0A48_02981	A0A1V8TLT0	GI:1172597411|EMBL-CDS:OQO12339.1	#004040	Rachicladosporium antarcticum.	A0A1V8TLT0	463	A0A1V8TLT0	Rachicladosporium antarcticum
27	4	Uncharacterized protein	NAEU01000094	B0A51_03854	A0A1V8UZN9	GI:1172618759|EMBL-CDS:OQO29150.1	#004040	Rachicladosporium sp. CCFEE 5018.	A0A1V8UZN9	463	A0A1V8UZN9	Rachicladosporium sp. CCFEE 5018
27	4	Uncharacterized protein	NAEU01001494	B0A51_16733	A0A1V8TPN0	GI:1172598322|EMBL-CDS:OQO13201.1	#004040	Rachicladosporium sp. CCFEE 5018.	A0A1V8TPN0	184	A0A1V8TPN0	Rachicladosporium sp. CCFEE 5018
28	4	Putative endoglucanase	LAQI01000270	UCDDS831_g08802	A0A0G2DTZ7	GI:821057888|EMBL-CDS:KKY13691.1	#400040	Diplodia seriata.	A0A0G2DTZ7	680	A0A0G2DTZ7	Diplodia seriata
28	4	Extracellular protein	MNUE01000031	BKCO1_310008	A0A1J9QY81	GI:1103746844|EMBL-CDS:OJD33329.1	#400040	Diplodia corticola.	A0A1J9QY81	720	A0A1J9QY81	Diplodia corticola
28	4	Putative endoglucanase protein	KB916340	UCRNP2_5894	R1GMX4	GI:615416256|GI:485921698|EMBL-CDS:EOD47354.1|REFSEQ:XP_007585164.1	#400040	Botryosphaeria parva (strain UCR-NP2)	R1GMX4	217	R1GMX4	Neofusicoccum parvum UCRNP2
28	4	Endoglucanase| putative	AHHD01000042	MPH_01030	K2S9U9	GI:407928816|EMBL-CDS:EKG21662.1	#400040	Macrophomina phaseolina (strain MS6)	K2S9U9	521	K2S9U9	Macrophomina phaseolina MS6
29	4	Uncharacterized protein	MCFF01000064	BCR41DRAFT_426301	A0A1Y2G7I8	GI:1183477898|EMBL-CDS:ORZ00039.1	#404000	Lobosporangium transversale.	A0A1Y2G7I8	239	A0A1Y2G7I8	Lobosporangium transversale
29	4	Uncharacterized protein	KV442011	K457DRAFT_885987	A0A197KHM2	GI:1032655378|EMBL-CDS:OAQ36643.1	#404000	Mortierella elongata AG-77.	A0A197KHM2	236	A0A197KHM2	Mortierella elongata AG-77
29	4	Uncharacterized protein	KV442020	K457DRAFT_14758	A0A197K8N7	GI:1032652264|EMBL-CDS:OAQ33538.1	#404000	Mortierella elongata AG-77.	A0A197K8N7	238	A0A197K8N7	Mortierella elongata AG-77
29	4	Uncharacterized protein	MCFF01000010	BCR41DRAFT_420662	A0A1Y2GTW4	GI:1183499277|EMBL-CDS:ORZ22921.1	#404000	Lobosporangium transversale.	A0A1Y2GTW4	236	A0A1Y2GTW4	Lobosporangium transversale
30	4	Uncharacterized protein	KQ954470	RHOSPDRAFT_32559	A0A109FJP4	GI:983147678|EMBL-CDS:KWU45637.1	#804040	Rhodotorula sp. JG-1b.	A0A109FJP4	357	A0A109FJP4	Rhodotorula sp. JG-1b
30	4	FGENESH: predicted gene_8.329 protein	CWKI01000008	BN2166_0044740	A0A0K3CI17	EMBL-CDS:CTR08613.1	#804040	Rhodosporidium toruloides	A0A0K3CI17	374	A0A0K3CI17	Rhodotorula toruloides
30	4	Uncharacterized protein	MCGR01000003	BCR35DRAFT_328665	A0A1Y2G5X9	GI:1183466976|EMBL-CDS:ORY90911.1	#804040	Leucosporidium creatinivorum.	A0A1Y2G5X9	406	A0A1Y2G5X9	Leucosporidium creatinivorum
30	4	Uncharacterized protein	KQ474075	RHOBADRAFT_6848	A0A194S8A3	GI:939614804|GI:1069920558|EMBL-CDS:KPV76822.1|REFSEQ:XP_018272871.1	#804040	Rhodotorula graminis (strain WP1)	A0A194S8A3	203	A0A194S8A3	Rhodotorula graminis WP1
31	3	Uncharacterized protein	CM001234	MGG_13619	G4N9K9	GI:389639766|GI:351643335|EMBL-CDS:EHA51197.1|REFSEQ:XP_003717516.1	#408040	Magnaporthe oryzae (strain 70-15 / ATCC MYA-4617 / FGSC 8958)	G4N9K9	348	G4N9K9	Magnaporthe oryzae 70-15
31	3	Uncharacterized protein	JH793247	OOU_Y34scaffold00694g10	L7HXI4	GI:440466405|EMBL-CDS:ELQ35674.1	#408040	Magnaporthe oryzae (strain Y34)	L7HXI4	1387	L7HXI4	Magnaporthe oryzae Y34
31	3	Uncharacterized protein	JH795610	OOW_P131scaffold01178g3	L7J042	GI:440480884|EMBL-CDS:ELQ61523.1	#408040	Magnaporthe oryzae (strain P131)	L7J042	553	L7J042	Magnaporthe oryzae P131
32	3	Uncharacterized protein	FJUX01000017	RAG0_04247	A0A1E1K875	EMBL-CDS:CZS94191.1	#404080	Rhynchosporium agropyri.	A0A1E1K875	467	A0A1E1K875	Rhynchosporium agropyri
32	3	Uncharacterized protein	FJUW01000017	RCO7_07896	A0A1E1KNH4	EMBL-CDS:CZS99551.1	#404080	Rhynchosporium commune.	A0A1E1KNH4	459	A0A1E1KNH4	Rhynchosporium commune
32	3	Uncharacterized protein	FJVC01000383	RSE6_10382	A0A1E1MKA4	EMBL-CDS:CZT49521.1	#404080	Rhynchosporium secalis	A0A1E1MKA4	459	A0A1E1MKA4	Rhynchosporium secalis
33	3	Uncharacterized protein	KI966410	DRE_00371	W7I5E1	GI:582959201|EMBL-CDS:EWC47403.1	#40FFFF	Drechslerella stenobrocha 248.	W7I5E1	443	W7I5E1	Drechslerella stenobrocha 248
33	3	Uncharacterized protein	AQGS01000443	H072_6402	S8BKQ6	GI:748508227|GI:526198995|EMBL-CDS:EPS39968.1|REFSEQ:XP_011112199.1	#40FFFF	Dactylellina haptotyla (strain CBS 200.50)	S8BKQ6	420	S8BKQ6	Dactylellina haptotyla CBS 200.50
33	3	Uncharacterized protein	ADOT01000016	AOL_s00007g365	G1X256	GI:345570204|GI:748486561|EMBL-CDS:EGX53029.1|REFSEQ:XP_011118568.1	#40FFFF	Arthrobotrys oligospora (strain ATCC 24927 / CBS 115.81 / DSM 1491)	G1X256	425	G1X256	Arthrobotrys oligospora ATCC 24927
34	3	Uncharacterized protein	KI966418	DRE_04314	W7HQD5	GI:582958161|EMBL-CDS:EWC46371.1	#FF40FF	Drechslerella stenobrocha 248.	W7HQD5	435	W7HQD5	Drechslerella stenobrocha 248
34	3	Uncharacterized protein	AQGS01000025	H072_1087	S8APQ0	GI:526204753|GI:748482985|EMBL-CDS:EPS44930.1|REFSEQ:XP_011107079.1	#FF40FF	Dactylellina haptotyla (strain CBS 200.50)	S8APQ0	453	S8APQ0	Dactylellina haptotyla CBS 200.50
34	3	Uncharacterized protein	ADOT01000310	AOL_s00210g374	G1XSL5	GI:345560808|GI:748527234|EMBL-CDS:EGX43927.1|REFSEQ:XP_011127477.1	#FF40FF	Arthrobotrys oligospora (strain ATCC 24927 / CBS 115.81 / DSM 1491)	G1XSL5	441	G1XSL5	Arthrobotrys oligospora ATCC 24927
35	3	Uncharacterized protein	GG745332	AMAG_04871	A0A0L0S6I5	GI:909131326|EMBL-CDS:KNE58045.1	#FF0040	Allomyces macrogynus ATCC 38327.	A0A0L0S6I5	499	A0A0L0S6I5	Allomyces macrogynus ATCC 38327
35	3	Uncharacterized protein	GG745334	AMAG_03551	A0A0L0SA14	GI:909132764|EMBL-CDS:KNE59234.1	#FF0040	Allomyces macrogynus ATCC 38327.	A0A0L0SA14	372	A0A0L0SA14	Allomyces macrogynus ATCC 38327
35	3	Uncharacterized protein	GG745334	AMAG_03551	A0A0L0S9F2	GI:909132763|EMBL-CDS:KNE59233.1	#FF0040	Allomyces macrogynus ATCC 38327.	A0A0L0S9F2	316	A0A0L0S9F2	Allomyces macrogynus ATCC 38327
36	3	Uncharacterized protein	JH792995	OOU_Y34scaffold00468g1	L7I9G9	GI:440470855|EMBL-CDS:ELQ39898.1	#40FF00	Magnaporthe oryzae (strain Y34)	L7I9G9	194	L7I9G9	Magnaporthe oryzae Y34
36	3	Uncharacterized protein	JH794978	OOW_P131scaffold00107g1	L7JNQ3	GI:440490313|EMBL-CDS:ELQ69881.1	#40FF00	Magnaporthe oryzae (strain P131)	L7JNQ3	173	L7JNQ3	Magnaporthe oryzae P131
36	3	Uncharacterized protein	CM001231	MGG_13719	G4MP46	GI:351648446|GI:389622527|EMBL-CDS:EHA56305.1|REFSEQ:XP_003708917.1	#40FF00	Magnaporthe oryzae (strain 70-15 / ATCC MYA-4617 / FGSC 8958)	G4MP46	363	G4MP46	Magnaporthe oryzae 70-15
37	3	Uncharacterized protein	KQ964932	CONCODRAFT_30031	A0A137NRA8	GI:1000773572|EMBL-CDS:KXN65254.1	#0040FF	Conidiobolus coronatus (strain ATCC 28846 / CBS 209.66 / NRRL 28638)	A0A137NRA8	162	A0A137NRA8	Conidiobolus coronatus NRRL 28638
37	3	Uncharacterized protein	KQ964760	CONCODRAFT_27827	A0A137NTY4	GI:1000774648|EMBL-CDS:KXN66158.1	#0040FF	Conidiobolus coronatus (strain ATCC 28846 / CBS 209.66 / NRRL 28638)	A0A137NTY4	178	A0A137NTY4	Conidiobolus coronatus NRRL 28638
37	3	Uncharacterized protein	KQ964760	CONCODRAFT_21216	A0A137NTU5	GI:1000774649|EMBL-CDS:KXN66159.1	#0040FF	Conidiobolus coronatus (strain ATCC 28846 / CBS 209.66 / NRRL 28638)	A0A137NTU5	178	A0A137NTU5	Conidiobolus coronatus NRRL 28638
38	3	Uncharacterized protein	MCFE01000441	K493DRAFT_305715	A0A1Y1XUP9	GI:1183362520|EMBL-CDS:ORX89497.1	#FF8040	Basidiobolus meristosporus CBS 931.73.	A0A1Y1XUP9	208	A0A1Y1XUP9	Basidiobolus meristosporus CBS 931.73
38	3	Uncharacterized protein	MCFE01000426	K493DRAFT_232620	A0A1Y1XVG8	GI:1183362824|EMBL-CDS:ORX89739.1	#FF8040	Basidiobolus meristosporus CBS 931.73.	A0A1Y1XVG8	213	A0A1Y1XVG8	Basidiobolus meristosporus CBS 931.73
38	3	Uncharacterized protein	MCFE01000386	K493DRAFT_230891	A0A1Y1XX35	GI:1183363549|EMBL-CDS:ORX90310.1	#FF8040	Basidiobolus meristosporus CBS 931.73.	A0A1Y1XX35	210	A0A1Y1XX35	Basidiobolus meristosporus CBS 931.73
39	2	Uncharacterized protein	LSBH01000004	VFPBJ_05318	A0A179GQZ3	GI:1032873013|EMBL-CDS:OAQ79733.1	#40FF80	Purpureocillium lilacinum.	A0A179GQZ3	505	A0A179GQZ3	Purpureocillium lilacinum
39	2	Uncharacterized protein	LSBI01000006	VFPFJ_07329	A0A179HFS8	GI:1069605480|GI:1032882155|EMBL-CDS:OAQ88864.1|REFSEQ:XP_018177583.1	#40FF80	Purpureocillium lilacinum.	A0A179HFS8	444	A0A179HFS8	Purpureocillium lilacinum
40	2	Uncharacterized protein	CM001233	MGG_15266	G4N2X6	GI:389631158|GI:351645564|EMBL-CDS:EHA53425.1|REFSEQ:XP_003713232.1	#8040FF	Magnaporthe oryzae (strain 70-15 / ATCC MYA-4617 / FGSC 8958)	G4N2X6	323	G4N2X6	Magnaporthe oryzae 70-15
40	2	Uncharacterized protein	JH795465	OOW_P131scaffold01380g2	L7IV62	GI:440478334|EMBL-CDS:ELQ59175.1	#8040FF	Magnaporthe oryzae (strain P131)	L7IV62	323	L7IV62	Magnaporthe oryzae P131
41	2	Uncharacterized protein	LN891070	GSTUAT00006135001	A0A292PQH0	EMBL-CDS:CUS09776.1	#00FF40	Tuber aestivum	A0A292PQH0	223	A0A292PQH0	Tuber aestivum
41	2	Uncharacterized protein	FN430351	GSTUM_00010365001	D5GLR1	GI:296423491|GI:295637524|EMBL-CDS:CAZ85478.1|REFSEQ:XP_002841287.1	#00FF40	Tuber melanosporum (strain Mel28)	D5GLR1	223	D5GLR1	Tuber melanosporum Mel28
42	2	Uncharacterized protein	MAVT02001356	DHEL01_v210455	A0A2P5HLP9	EMBL-CDS:POS71156.1	#4000FF	Diaporthe helianthi.	A0A2P5HLP9	258	A0A2P5HLP9	Diaporthe helianthi
42	2	Uncharacterized protein	LCUC01000331	UCDDA912_g07732	A0A0G2HAQ4	GI:821078643|EMBL-CDS:KKY32293.1	#4000FF	Diaporthe ampelina.	A0A0G2HAQ4	259	A0A0G2HAQ4	Diaporthe ampelina
43	2	Uncharacterized protein	CH476626	SS1G_05257	A7EIW4	GI:156055810|GI:154703041|EMBL-CDS:EDO02780.1|REFSEQ:XP_001593829.1	#FF4000	Sclerotinia sclerotiorum (strain ATCC 18683 / 1980 / Ss-1)	A7EIW4	342	A7EIW4	Sclerotinia sclerotiorum 1980 UF-70
43	2	Uncharacterized protein	CP017821	sscle_08g065330	A0A1D9QAW0	GI:1095454806|EMBL-CDS:APA11763.1	#FF4000	Sclerotinia sclerotiorum (strain ATCC 18683 / 1980 / Ss-1)	A0A1D9QAW0	341	A0A1D9QAW0	Sclerotinia sclerotiorum 1980 UF-70
44	2	Uncharacterized protein	NKHZ01000029	CAC42_7691	A0A2K1QXE9	EMBL-CDS:PNS19724.1	#000040	Elsinoe sp. CQ-2017a.	A0A2K1QXE9	400	A0A2K1QXE9	Elsinoe sp. CQ-2017a
44	2	Uncharacterized protein	NHZQ01000412	B9Z65_2148	A0A2P7YN67	EMBL-CDS:PSK37406.1	#000040	Elsinoe australis.	A0A2P7YN67	427	A0A2P7YN67	Elsinoe australis
45	2	Uncharacterized protein	LN890970	GSTUAT00002294001	A0A292Q3Q3	EMBL-CDS:CUS13585.1	#400000	Tuber aestivum	A0A292Q3Q3	428	A0A292Q3Q3	Tuber aestivum
45	2	Uncharacterized protein	FN430109	GSTUM_00005818001	D5GCC5	GI:296416629|GI:295633872|EMBL-CDS:CAZ82168.1|REFSEQ:XP_002837977.1	#400000	Tuber melanosporum (strain Mel28)	D5GCC5	358	D5GCC5	Tuber melanosporum Mel28
46	2	Uncharacterized protein	FN430220	GSTUM_00007120001	D5GFW8	GI:296419226|GI:295635226|EMBL-CDS:CAZ83411.1|REFSEQ:XP_002839220.1	#004000	Tuber melanosporum (strain Mel28)	D5GFW8	217	D5GFW8	Tuber melanosporum Mel28
46	2	Uncharacterized protein	LN891032	GSTUAT00004848001	A0A292PX44	EMBL-CDS:CUS11050.1	#004000	Tuber aestivum	A0A292PX44	191	A0A292PX44	Tuber aestivum
47	2	Putative endoglucanase	MCFE01000536	K493DRAFT_143344	A0A1Y1XRF3	GI:1183361002|EMBL-CDS:ORX88341.1	#008040	Basidiobolus meristosporus CBS 931.73.	A0A1Y1XRF3	175	A0A1Y1XRF3	Basidiobolus meristosporus CBS 931.73
47	2	Uncharacterized protein	MCFE01000023	K493DRAFT_204203	A0A1Y1Z739	GI:1183380173|EMBL-CDS:ORY05625.1	#008040	Basidiobolus meristosporus CBS 931.73.	A0A1Y1Z739	198	A0A1Y1Z739	Basidiobolus meristosporus CBS 931.73
48	2	Uncharacterized protein	HF936526	PCON_03607	U4LR33	GI:549043141|EMBL-CDS:CCX34395.1	#400080	Pyronema omphalodes (strain CBS 100304)	U4LR33	308	U4LR33	Pyronema omphalodes CBS 100304
48	2	Uncharacterized protein	LN891029	GSTUAT00004769001	A0A292PXG5	EMBL-CDS:CUS11170.1	#400080	Tuber aestivum	A0A292PXG5	459	A0A292PXG5	Tuber aestivum
	1	Uncharacterized protein	AHHD01000163	MPH_03242	K2SAE7	GI:407926412|EMBL-CDS:EKG19379.1		Macrophomina phaseolina (strain MS6)	K2SAE7	160	K2SAE7	Macrophomina phaseolina MS6
	1	Uncharacterized protein	KI912116	PFICI_10729	W3WSL8	GI:630031337|GI:573056980|EMBL-CDS:ETS76855.1|REFSEQ:XP_007837501.1		Pestalotiopsis fici (strain W106-1 / CGMCC3.15140)	W3WSL8	409	W3WSL8	Pestalotiopsis fici W106-1
	1	Lytic polysaccharide monooxygenase	MNUE01000032	BKCO1_3200077	A0A1J9RZH9	GI:1103746710|EMBL-CDS:OJD33196.1		Diplodia corticola.	A0A1J9RZH9	416	A0A1J9RZH9	Diplodia corticola
	1	Podospora anserina S mat+ genomic DNA chromosome 2| supercontig 2	CU640366	PODANS_2_7840	B2B6I0	GI:681095679|GI:171693311|GI:170946604|EMBL-CDS:CAP73406.1|EMBL-CDS:CDP25808.1|REFSEQ:XP_001911580.1		Podospora anserina (strain S / ATCC MYA-4624 / DSM 980 / FGSC 10383)	B2B6I0	321	B2B6I0	Podospora anserina S mat+
	1	Uncharacterized protein	AHHD01000715	MPH_13695	K2R8S1	GI:407915768|EMBL-CDS:EKG09287.1		Macrophomina phaseolina (strain MS6)	K2R8S1	392	K2R8S1	Macrophomina phaseolina MS6
	1	Endoglucanase	KE145370	GLAREA_02301	S3DIK9	GI:636766809|GI:512197553|EMBL-CDS:EPE26388.1|REFSEQ:XP_008085578.1		Glarea lozoyensis (strain ATCC 20868 / MF5171)	S3DIK9	262	S3DIK9	Glarea lozoyensis ATCC 20868
	1	Genomic scaffold| ProqFM164S01	HG792015	PROQFM164_S01g002229	W6PW14	GI:584416711|EMBL-CDS:CDM28418.1		Penicillium roqueforti (strain FM164)	W6PW14	121	W6PW14	Penicillium roqueforti FM164
	1	Uncharacterized protein	AMYD01000704	CGLO_03386	T0KLU2	GI:530476741|EMBL-CDS:EQB56592.1		Colletotrichum gloeosporioides (strain Cg-14)	T0KLU2	277	T0KLU2	Colletotrichum gloeosporioides Cg-14
	1	Uncharacterized protein	BABT02000061	E5Q_02042	G7DXS8	GI:953452427|GI:658166415|EMBL-CDS:GAA95388.1|REFSEQ:XP_014569766.1		Mixia osmundae (strain CBS 9802 / IAM 14324 / JCM 22182 / KY 12970)	G7DXS8	282	G7DXS8	Mixia osmundae IAM 14324
	1	Uncharacterized protein	LN483142	None	A0A0F7SKL3	GI:820655094|EMBL-CDS:CED82682.1		Phaffia rhodozyma	A0A0F7SKL3	613	A0A0F7SKL3	Xanthophyllomyces dendrorhous
	1	Uncharacterized protein	BABT02000026	E5Q_00684	G7DTX7	GI:658167040|GI:953453509|EMBL-CDS:GAA94037.1|REFSEQ:XP_014570307.1		Mixia osmundae (strain CBS 9802 / IAM 14324 / JCM 22182 / KY 12970)	G7DTX7	327	G7DTX7	Mixia osmundae IAM 14324
	1	ARAD1D20262p	HG937694	GNLVRS02_ARAD1D20262g	A0A060TG46	EMBL-CDS:CDP37822.1		Blastobotrys adeninivorans	A0A060TG46	245	A0A060TG46	Blastobotrys adeninivorans
	1	Uncharacterized protein	MCFL01000057	BCR44DRAFT_1392493	A0A1Y2HCB0	GI:1183508354|EMBL-CDS:ORZ31624.1		Catenaria anguillulae PL171.	A0A1Y2HCB0	180	A0A1Y2HCB0	Catenaria anguillulae PL171
	1	Uncharacterized protein	ADOT01000163	AOL_s00091g16	G1XHW4	GI:748513770|GI:345564300|EMBL-CDS:EGX47272.1|REFSEQ:XP_011124076.1		Arthrobotrys oligospora (strain ATCC 24927 / CBS 115.81 / DSM 1491)	G1XHW4	448	G1XHW4	Arthrobotrys oligospora ATCC 24927
	1	Lytic polysaccharide monooxygenase	KV407466	L228DRAFT_285944	A0A164ZUH7	GI:1069630661|GI:1018267122|EMBL-CDS:KZF19541.1|REFSEQ:XP_018185096.1		Xylona heveae TC161.	A0A164ZUH7	338	A0A164ZUH7	Xylona heveae TC161
	1	Uncharacterized protein	KQ964604	CONCODRAFT_28191	A0A137NYT9	GI:1000776583|EMBL-CDS:KXN67937.1		Conidiobolus coronatus (strain ATCC 28846 / CBS 209.66 / NRRL 28638)	A0A137NYT9	177	A0A137NYT9	Conidiobolus coronatus NRRL 28638
	1	Similar to extracellular protein| putative [Metarhizium acridum CQMa 102] acc. no. EFY86242	HF935560	PCON_10378	U4LI86	GI:549050144|EMBL-CDS:CCX31247.1		Pyronema omphalodes (strain CBS 100304)	U4LI86	408	U4LI86	Pyronema omphalodes CBS 100304
	1	Uncharacterized protein	GG745338	AMAG_06273	A0A0L0SG10	GI:909135404|EMBL-CDS:KNE61448.1		Allomyces macrogynus ATCC 38327.	A0A0L0SG10	408	A0A0L0SG10	Allomyces macrogynus ATCC 38327
	1	Uncharacterized protein	HF935349	PCON_06882	U4L4R1	GI:549053767|EMBL-CDS:CCX07293.1		Pyronema omphalodes (strain CBS 100304)	U4L4R1	181	U4L4R1	Pyronema omphalodes CBS 100304
	1	Uncharacterized protein	KN847700	PV09_09779	A0A0D1YCI6	GI:759221255|GI:1022820657|EMBL-CDS:KIV98396.1|REFSEQ:XP_016208266.1		Verruconis gallopava.	A0A0D1YCI6	310	A0A0D1YCI6	Verruconis gallopava
	1	Putative endoglucanase	HM001233	107	E2EYZ3	GI:300835038|EMBL-CDS:ADK37848.1		Entomophthora planchoniana.	E2EYZ3	191	E2EYZ3	Entomophthora planchoniana
	1	Uncharacterized protein	KN847575	PV09_08738	A0A0D2AKN0	GI:1022815524|GI:1022815528|GI:759222542|GI:759222543|EMBL-CDS:KIV99558.1|EMBL-CDS:KIV99559.1|REFSEQ:XP_016209428.1|REFSEQ:XP_016209429.1		Verruconis gallopava.	A0A0D2AKN0	294	A0A0D2AKN0	Verruconis gallopava
	1	Putative endoglucanase	MCFE01000029	K493DRAFT_140138	A0A1Y1Z480	GI:1183379524|EMBL-CDS:ORY04996.1		Basidiobolus meristosporus CBS 931.73.	A0A1Y1Z480	175	A0A1Y1Z480	Basidiobolus meristosporus CBS 931.73
	1	Uncharacterized protein	BABT02000165	E5Q_05684	G7E835	EMBL-CDS:GAA98995.1		Mixia osmundae (strain CBS 9802 / IAM 14324 / JCM 22182 / KY 12970)	G7E835	397	G7E835	Mixia osmundae IAM 14324
	1	Endoglucanase	LFIW01002754	CI238_02951	A0A166LJT5	GI:1020426529|EMBL-CDS:KZL63607.1		Colletotrichum incanum.	A0A166LJT5	111	A0A166LJT5	Colletotrichum incanum
	1	Uncharacterized protein	HF935349	PCON_06880	U4KZ33	GI:549053765|EMBL-CDS:CCX07291.1		Pyronema omphalodes (strain CBS 100304)	U4KZ33	268	U4KZ33	Pyronema omphalodes CBS 100304
	1	Uncharacterized protein	KQ964419	CONCODRAFT_167137	A0A137PIQ5	GI:1000783746|EMBL-CDS:KXN74877.1		Conidiobolus coronatus (strain ATCC 28846 / CBS 209.66 / NRRL 28638)	A0A137PIQ5	226	A0A137PIQ5	Conidiobolus coronatus NRRL 28638
	1	Predicted protein		NAEGRDRAFT_70554	D2VNM8	GI:284087768|EMBL-CDS:EFC41435.1		Naegleria gruberi	D2VNM8	480	D2VNM8	Naegleria gruberi
	1	Uncharacterized protein	CVQH01022172	BN1708_016119	A0A0G4ME50	EMBL-CDS:CRK32497.1		Verticillium longisporum.	A0A0G4ME50	366	A0A0G4ME50	Verticillium longisporum
	1	Putative endoglucanase	KQ964633	CONCODRAFT_42798	A0A137NXM3	GI:1000776114|EMBL-CDS:KXN67497.1		Conidiobolus coronatus (strain ATCC 28846 / CBS 209.66 / NRRL 28638)	A0A137NXM3	194	A0A137NXM3	Conidiobolus coronatus NRRL 28638
	1	Uncharacterized protein	KJ694717	None	A0A059WU06	GI:636674993|EMBL-CDS:AIA15627.1		uncultured bacterium.	A0A059WU06	198	A0A059WU06	uncultured bacterium
	1	WGS project CABT00000000 data| contig 2.57	CABT02000057	SMAC_08398	F7WA19	EMBL-CDS:CCC14087.1		Sordaria macrospora (strain ATCC MYA-333 / DSM 997 / K(L3346)	F7WA19	1250	F7WA19	Sordaria macrospora k-hell
	1	Uncharacterized protein	MCFL01000116	BCR44DRAFT_115004	A0A1Y2H5X1	GI:1183506600|EMBL-CDS:ORZ29929.1		Catenaria anguillulae PL171.	A0A1Y2H5X1	157	A0A1Y2H5X1	Catenaria anguillulae PL171
	1	Uncharacterized protein	MOOB01000987	PENNAL_c0987G02300	A0A1V6TLD9	GI:1168127910|EMBL-CDS:OQE27205.1		Penicillium nalgiovense.	A0A1V6TLD9	114	A0A1V6TLD9	Penicillium nalgiovense
	1	Uncharacterized protein	MCFD01000002	DL89DRAFT_209859	A0A1Y1WHL2	GI:1183343974|EMBL-CDS:ORX72865.1		Linderina pennispora.	A0A1Y1WHL2	163	A0A1Y1WHL2	Linderina pennispora
	1	Putative chitin-binding domain 3 protein	KB916059	UCRNP2_3528	R1GDM3	GI:615408957|GI:485925026|EMBL-CDS:EOD49695.1|REFSEQ:XP_007582824.1		Botryosphaeria parva (strain UCR-NP2)	R1GDM3	233	R1GDM3	Neofusicoccum parvum UCRNP2
	1	Uncharacterized protein	KQ965800	M427DRAFT_102281	A0A139A3Y7	GI:1001607730|EMBL-CDS:KXS11537.1		Gonapodya prolifera JEL478.	A0A139A3Y7	113	A0A139A3Y7	Gonapodya prolifera JEL478
	1	Uncharacterized protein	KQ964444	CONCODRAFT_77581	A0A137PDE0	GI:1000781784|EMBL-CDS:KXN72951.1		Conidiobolus coronatus (strain ATCC 28846 / CBS 209.66 / NRRL 28638)	A0A137PDE0	319	A0A137PDE0	Conidiobolus coronatus NRRL 28638
	1	Uncharacterized protein	JPKA01000759	V498_04026	A0A094FTI9	GI:682427029|EMBL-CDS:KFY94159.1		Pseudogymnoascus sp. VKM F-4517	A0A094FTI9	106	A0A094FTI9	Pseudogymnoascus sp. VKM F-4517 (FW-2822)
	1	Uncharacterized protein	KE561029	O9G_004439	A0A075AYQ4	GI:528893545|EMBL-CDS:EPZ33847.1		Rozella allomycis CSF55.	A0A075AYQ4	159	A0A075AYQ4	Rozella allomycis CSF55
	1	Uncharacterized protein	NPFK01000100	PENO1_042840	A0A2H3IF29	EMBL-CDS:PCH01453.1		Penicillium occitanis.	A0A2H3IF29	108	A0A2H3IF29	Penicillium occitanis
	1	Uncharacterized protein	HF935349	PCON_06881	U4KYH3	GI:549053766|EMBL-CDS:CCX07292.1		Pyronema omphalodes (strain CBS 100304)	U4KYH3	153	U4KYH3	Pyronema omphalodes CBS 100304
	1	Uncharacterized protein	KZ303486	COEREDRAFT_33908	A0A2G5BL62	EMBL-CDS:PIA19743.1		Coemansia reversa (strain ATCC 12441 / NRRL 1564)	A0A2G5BL62	105	A0A2G5BL62	Coemansia reversa NRRL 1564
	1	Uncharacterized protein	KQ257453	SPPG_02907	A0A0L0HMW5	GI:1026966695|GI:907096913|EMBL-CDS:KND02442.1|REFSEQ:XP_016610481.1		Spizellomyces punctatus DAOM BR117.	A0A0L0HMW5	317	A0A0L0HMW5	Spizellomyces punctatus DAOM BR117
	1	Uncharacterized protein	MCFE01000321	K493DRAFT_304060	A0A1Y1Y0A1	GI:1183364925|EMBL-CDS:ORX91443.1		Basidiobolus meristosporus CBS 931.73.	A0A1Y1Y0A1	202	A0A1Y1Y0A1	Basidiobolus meristosporus CBS 931.73
	1	Uncharacterized protein	JMKJ01000110	DI09_19p80	A0A098VWT5	GI:914963989|GI:692169769|EMBL-CDS:KGG52226.1|REFSEQ:XP_013238691.1		Mitosporidium daphniae.	A0A098VWT5	209	A0A098VWT5	Mitosporidium daphniae
	1	Lytic polysaccharide monooxygenase	KQ965735	M427DRAFT_374335	A0A139AV70	GI:1001616643|EMBL-CDS:KXS20385.1		Gonapodya prolifera JEL478.	A0A139AV70	199	A0A139AV70	Gonapodya prolifera JEL478
	1	Uncharacterized protein	GL877060	MAPG_11960	A0A0H2UCZ9	GI:835902388|EMBL-CDS:KLU93021.1		Magnaporthiopsis poae (strain ATCC 64411 / 73-15)	A0A0H2UCZ9	76	A0A0H2UCZ9	Magnaporthiopsis poae ATCC 64411
	1	Uncharacterized protein	KQ964519	CONCODRAFT_26497	A0A137P4F8	GI:1000778657|EMBL-CDS:KXN69907.1		Conidiobolus coronatus (strain ATCC 28846 / CBS 209.66 / NRRL 28638)	A0A137P4F8	129	A0A137P4F8	Conidiobolus coronatus NRRL 28638
	1	Uncharacterized protein	KQ965800	M427DRAFT_102285	A0A139A419	GI:1001607734|EMBL-CDS:KXS11541.1		Gonapodya prolifera JEL478.	A0A139A419	131	A0A139A419	Gonapodya prolifera JEL478
	1	Uncharacterized protein	DF938591	ANO11243_076230	A0A0S6XSF5	GI:752274894|EMBL-CDS:GAM89584.1		fungal sp. No.11243.	A0A0S6XSF5	372	A0A0S6XSF5	fungal sp. No.11243
	1	Uncharacterized protein	KQ964434	CONCODRAFT_27807	A0A137PF12	GI:1000782453|EMBL-CDS:KXN73599.1		Conidiobolus coronatus (strain ATCC 28846 / CBS 209.66 / NRRL 28638)	A0A137PF12	172	A0A137PF12	Conidiobolus coronatus NRRL 28638
	1	Lytic polysaccharide monooxygenase	KV442017	K457DRAFT_50239	A0A197KB26	GI:1032653112|EMBL-CDS:OAQ34383.1		Mortierella elongata AG-77.	A0A197KB26	106	A0A197KB26	Mortierella elongata AG-77
	1	Podospora anserina S mat+ genomic DNA chromosome 1| supercontig 1	CU633438	PODANS_1_5310	B2AAV6	GI:170948054|GI:171695624|GI:681092454|EMBL-CDS:CAP60218.1|EMBL-CDS:CDP22859.1|REFSEQ:XP_001912736.1		Podospora anserina (strain S / ATCC MYA-4624 / DSM 980 / FGSC 10383)	B2AAV6	289	B2AAV6	Podospora anserina S mat+
	1	Uncharacterized protein	MCFD01000030	DL89DRAFT_207678	A0A1Y1VVV1	GI:1183336339|EMBL-CDS:ORX65411.1		Linderina pennispora.	A0A1Y1VVV1	141	A0A1Y1VVV1	Linderina pennispora
	1	Uncharacterized protein	AHHD01000541	MPH_12937	K2RZW3	GI:407916630|EMBL-CDS:EKG09975.1		Macrophomina phaseolina (strain MS6)	K2RZW3	229	K2RZW3	Macrophomina phaseolina MS6
	1	Uncharacterized protein	MTSL01000176	PSACC_02787	A0A2H9TI14	EMBL-CDS:PJF17401.1		Paramicrosporidium saccamoebae.	A0A2H9TI14	154	A0A2H9TI14	Paramicrosporidium saccamoebae
	1	Uncharacterized protein	MCFD01000013	DL89DRAFT_218844	A0A1Y1W154	GI:1183338210|EMBL-CDS:ORX67212.1		Linderina pennispora.	A0A1Y1W154	167	A0A1Y1W154	Linderina pennispora
	1	Uncharacterized protein	MCFL01000020	BCR44DRAFT_24814	A0A1Y2HMQ0	GI:1183512623|EMBL-CDS:ORZ35856.1		Catenaria anguillulae PL171.	A0A1Y2HMQ0	316	A0A1Y2HMQ0	Catenaria anguillulae PL171
	1	Uncharacterized protein	KB707697	BcDW1_769	M7UA34	GI:472245979|EMBL-CDS:EMR90530.1		Botryotinia fuckeliana (strain BcDW1)	M7UA34	342	M7UA34	Botrytis cinerea BcDW1
	1	Uncharacterized protein	LCZI01000617	EMCG_08586	A0A0G2I5R5	GI:821509146|EMBL-CDS:KKZ65580.1		Emmonsia crescens UAMH 3008.	A0A0G2I5R5	99	A0A0G2I5R5	Emmonsia crescens UAMH 3008
	1	Putative chitin-domain 3 protein	DF977523	SAMD00023353_7800220	A0A1W2TUL4	GI:949384677|EMBL-CDS:GAP92305.1		Rosellinia necatrix	A0A1W2TUL4	243	A0A1W2TUL4	Rosellinia necatrix
	1	Uncharacterized protein	GG745340	AMAG_07510	A0A0L0SID0	GI:909136471|EMBL-CDS:KNE62276.1		Allomyces macrogynus ATCC 38327.	A0A0L0SID0	225	A0A0L0SID0	Allomyces macrogynus ATCC 38327
	1	Uncharacterized protein	MCFD01000030	DL89DRAFT_270951	A0A1Y1VVV9	GI:1183336338|EMBL-CDS:ORX65410.1		Linderina pennispora.	A0A1Y1VVV9	163	A0A1Y1VVV9	Linderina pennispora
	1	Uncharacterized protein	DF938581	ANO11243_017910	A0A0S6XD73	GI:752281822|EMBL-CDS:GAM83801.1		fungal sp. No.11243.	A0A0S6XD73	705	A0A0S6XD73	fungal sp. No.11243
	1	Uncharacterized protein	BDMC01000012	ANO14919_048120	A0A1V1T3L2	EMBL-CDS:GAW15403.1		fungal sp. No.14919.	A0A1V1T3L2	295	A0A1V1T3L2	fungal sp. No.14919
	1	Uncharacterized protein	KE561209	O9G_000076	A0A075ANT9	GI:528891115|EMBL-CDS:EPZ31597.1		Rozella allomycis CSF55.	A0A075ANT9	159	A0A075ANT9	Rozella allomycis CSF55
	1	Uncharacterized protein	MCFL01000020	BCR44DRAFT_41925	A0A1Y2HRX8	GI:1183512649|EMBL-CDS:ORZ35882.1		Catenaria anguillulae PL171.	A0A1Y2HRX8	227	A0A1Y2HRX8	Catenaria anguillulae PL171
	1	Uncharacterized protein	AHHD01000163	MPH_03241	K2RX84	GI:407926411|EMBL-CDS:EKG19378.1		Macrophomina phaseolina (strain MS6)	K2RX84	237	K2RX84	Macrophomina phaseolina MS6
	1	Pc03g00070 protein	AM920418	Pc03g00070	B6GVQ6	GI:255930030|GI:211580795|EMBL-CDS:CAP78969.1|REFSEQ:XP_002556576.1		Penicillium rubens (strain ATCC 28089 / DSM 1075 / NRRL 1951 /Wisconsin 54-1255)	B6GVQ6	130	B6GVQ6	Penicillium rubens Wisconsin 54-1255
	1	NCU01380_JW258_CDS/1-1301			zzz1738					628	zzz1738
	1	NCU01380_JW246_CDS/1-1247			zzz1739					628	zzz1739
	1	NCU01380_JW242_CDS/1-1230			zzz1740					628	zzz1740
	1	NCU01380_JW22_CDS/1-1183			zzz1741					628	zzz1741
	1	NCU01380_JW228_CDS/1-1296			zzz1742					628	zzz1742
	1	NCU01380_JW224_CDS/1-1209			zzz1743					628	zzz1743
	1	NCU01380_JW222_CDS/1-1219			zzz1744					628	zzz1744
	1	NCU01380_JW220_CDS/1-1456			zzz1745					628	zzz1745
	1	NCU01380_JW199_CDS/1-1212			zzz1746					628	zzz1746
	1	NCU01380_JW193_CDS/1-1423			zzz1747					628	zzz1747
	1	NCU01380_JW179_CDS/1-1251			zzz1748					628	zzz1748
	1	NCU01380_D112_CDS/1-1304			zzz1749					628	zzz1749
	1	NCU01380_D111_CDS/1-1292			zzz1750					628	zzz1750
	1	NCU01380_CAMH1105_CDS/1-1179			zzz1751					628	zzz1751
	1	NCU01380_AKFA6_CDS/1-1155			zzz1752					628	zzz1752
	1	NCU01380_AKFA31_CDS/1-1155			zzz1753					628	zzz1753
	1	NCU01380_AKFA2_CDS/1-1215			zzz1754					628	zzz1754
	1	NCU01380_AKFA24_CDS/1-1392			zzz1755					628	zzz1755
	1	NCU01380_AKFA20_CDS/1-1209			zzz1756					628	zzz1756
	1	NCU01380_AKFA16_CDS/1-1185			zzz1757					628	zzz1757
	1	NCU01380_AKFA12_CDS/1-1203			zzz1758					628	zzz1758
	1	NCU01380_AKFA10_CDS/1-1182			zzz1759					628	zzz1759
	1	NCU01380_P4479_CDS/1-1364			zzz1760					628	zzz1760
	1	NCU01380_P4489_CDS/1-1285			zzz1761					628	zzz1761
	1	NCU01380_D113_CDS/1-1200			zzz1762					628	zzz1762
	1	NCU01380_JW148_CDS/1-1120			zzz1763					628	zzz1763
	1	NCU01380_JW196_CDS/1-1227			zzz1764					628	zzz1764
	1	NCU01380_JW204_CDS/1-1325			zzz1765					628	zzz1765
	1	NCU01380_P4476_CDS/1-1211			zzz1766					628	zzz1766
	1	NCU01380_P4471_CDS/1-1218			zzz1767					628	zzz1767
	1	NCU01380_P4468_CDS/1-1274			zzz1768					628	zzz1768
	1	NCU01380_P4452_CDS/1-1230			zzz1769					628	zzz1769
	1	NCU01380_P4463_CDS/1-1407			zzz1770					628	zzz1770
	1	NCU01380_2489_CDS/1-1242			zzz1771					628	zzz1771
	1	NCU01380_2489_mRNA/1-1242			zzz1772					628	zzz1772
	1	NCU01380_JW75_CDS/1-1376			zzz1773					628	zzz1773
	1	Uncharacterized protein	GL988041	CTHT_0029290	G0S841	GI:340959907|GI:576039022|EMBL-CDS:EGS21088.1|REFSEQ:XP_006693384.1		Chaetomium thermophilum (strain DSM 1495 / CBS 144.50 / IMI 039719)	G0S841	200	G0S841	Chaetomium thermophilum var. thermophilum DSM 1495
	1	Uncharacterized protein	CP003009	THITE_120654	G2QTD0	GI:346996344|GI:367037405|EMBL-CDS:AEO62747.1|REFSEQ:XP_003649083.1		Thielavia terrestris (strain ATCC 38088 / NRRL 8126)	G2QTD0	207	G2QTD0	Thielavia terrestris NRRL 8126
	1	Uncharacterized protein	KE720795	EPUS_01253	U1GE47	GI:629636180|GI:539440423|EMBL-CDS:ERF75887.1|REFSEQ:XP_007786736.1		Endocarpon pusillum (strain Z07020 / HMAS-L-300199)	U1GE47	357	U1GE47	Endocarpon pusillum Z07020
	1	Uncharacterized protein	KN847534	PV09_02307	A0A0D1XUZ5	GI:1022786091|GI:759229615|EMBL-CDS:KIW06591.1|REFSEQ:XP_016216460.1		Verruconis gallopava.	A0A0D1XUZ5	399	A0A0D1XUZ5	Verruconis gallopava
	1	Uncharacterized protein	KB445550	BAUCODRAFT_52546	M2NA95	GI:627797961|GI:449305137|EMBL-CDS:EMD01144.1|REFSEQ:XP_007672328.1		Baudoinia panamericana (strain UAMH 10762)	M2NA95	211	M2NA95	Baudoinia panamericana UAMH 10762
	1	Uncharacterized protein	MSZU01000039	BK809_0000011	A0A1S8BQ56	GI:1137656005|EMBL-CDS:OMP89368.1		Diplodia seriata.	A0A1S8BQ56	398	A0A1S8BQ56	Diplodia seriata
	1	Chitin-binding domain 3	AHHD01000082	MPH_02027	K2S6Z1	GI:407927786|EMBL-CDS:EKG20672.1		Macrophomina phaseolina (strain MS6)	K2S6Z1	402	K2S6Z1	Macrophomina phaseolina MS6
	1	Uncharacterized protein	CH408033	CHGG_07679	Q2GWH5	GI:116199047|GI:88178958|EMBL-CDS:EAQ86426.1|REFSEQ:XP_001225335.1		Chaetomium globosum (strain ATCC 6205 / CBS 148.51 / DSM 1962 / NBRC6347 / NRRL 1970)	Q2GWH5	345	Q2GWH5	Chaetomium globosum CBS 148.51
	1	Uncharacterized protein	LXFE01000294	NEOLI_001382	A0A1U7LT66	GI:1127424052|EMBL-CDS:OLL25865.1		Neolecta irregularis DAH-3.	A0A1U7LT66	334	A0A1U7LT66	Neolecta irregularis DAH-3
	1	Uncharacterized protein	NJEV01000050	CDD83_8024	A0A2C6AJX9	EMBL-CDS:PHH92310.1		Cordyceps sp. RAO-2017.	A0A2C6AJX9	136	A0A2C6AJX9	Cordyceps sp. RAO-2017
	1	Putative endoglucanase	MCFI01000012	BCR37DRAFT_348511	A0A1Y2FC12	GI:1183456812|EMBL-CDS:ORY80866.1		Protomyces lactucaedebilis.	A0A1Y2FC12	189	A0A1Y2FC12	Protomyces lactucaedebilis
	1	Uncharacterized protein	CH445334	SNOG_06890	Q0UMX4	GI:169607663|GI:160701462|EMBL-CDS:EAT85541.2|REFSEQ:XP_001797251.1		Phaeosphaeria nodorum (strain SN15 / ATCC MYA-4574 / FGSC 10173)	Q0UMX4	360	Q0UMX4	Parastagonospora nodorum SN15
